# Supplementary material for: Proteomics of Fusobacterium nucleatum within a model developing oral microbial community
Source: PubMed Central journal article supplement (PMC4234264; doi:10.1002/mbo3.204), 2014-08-25

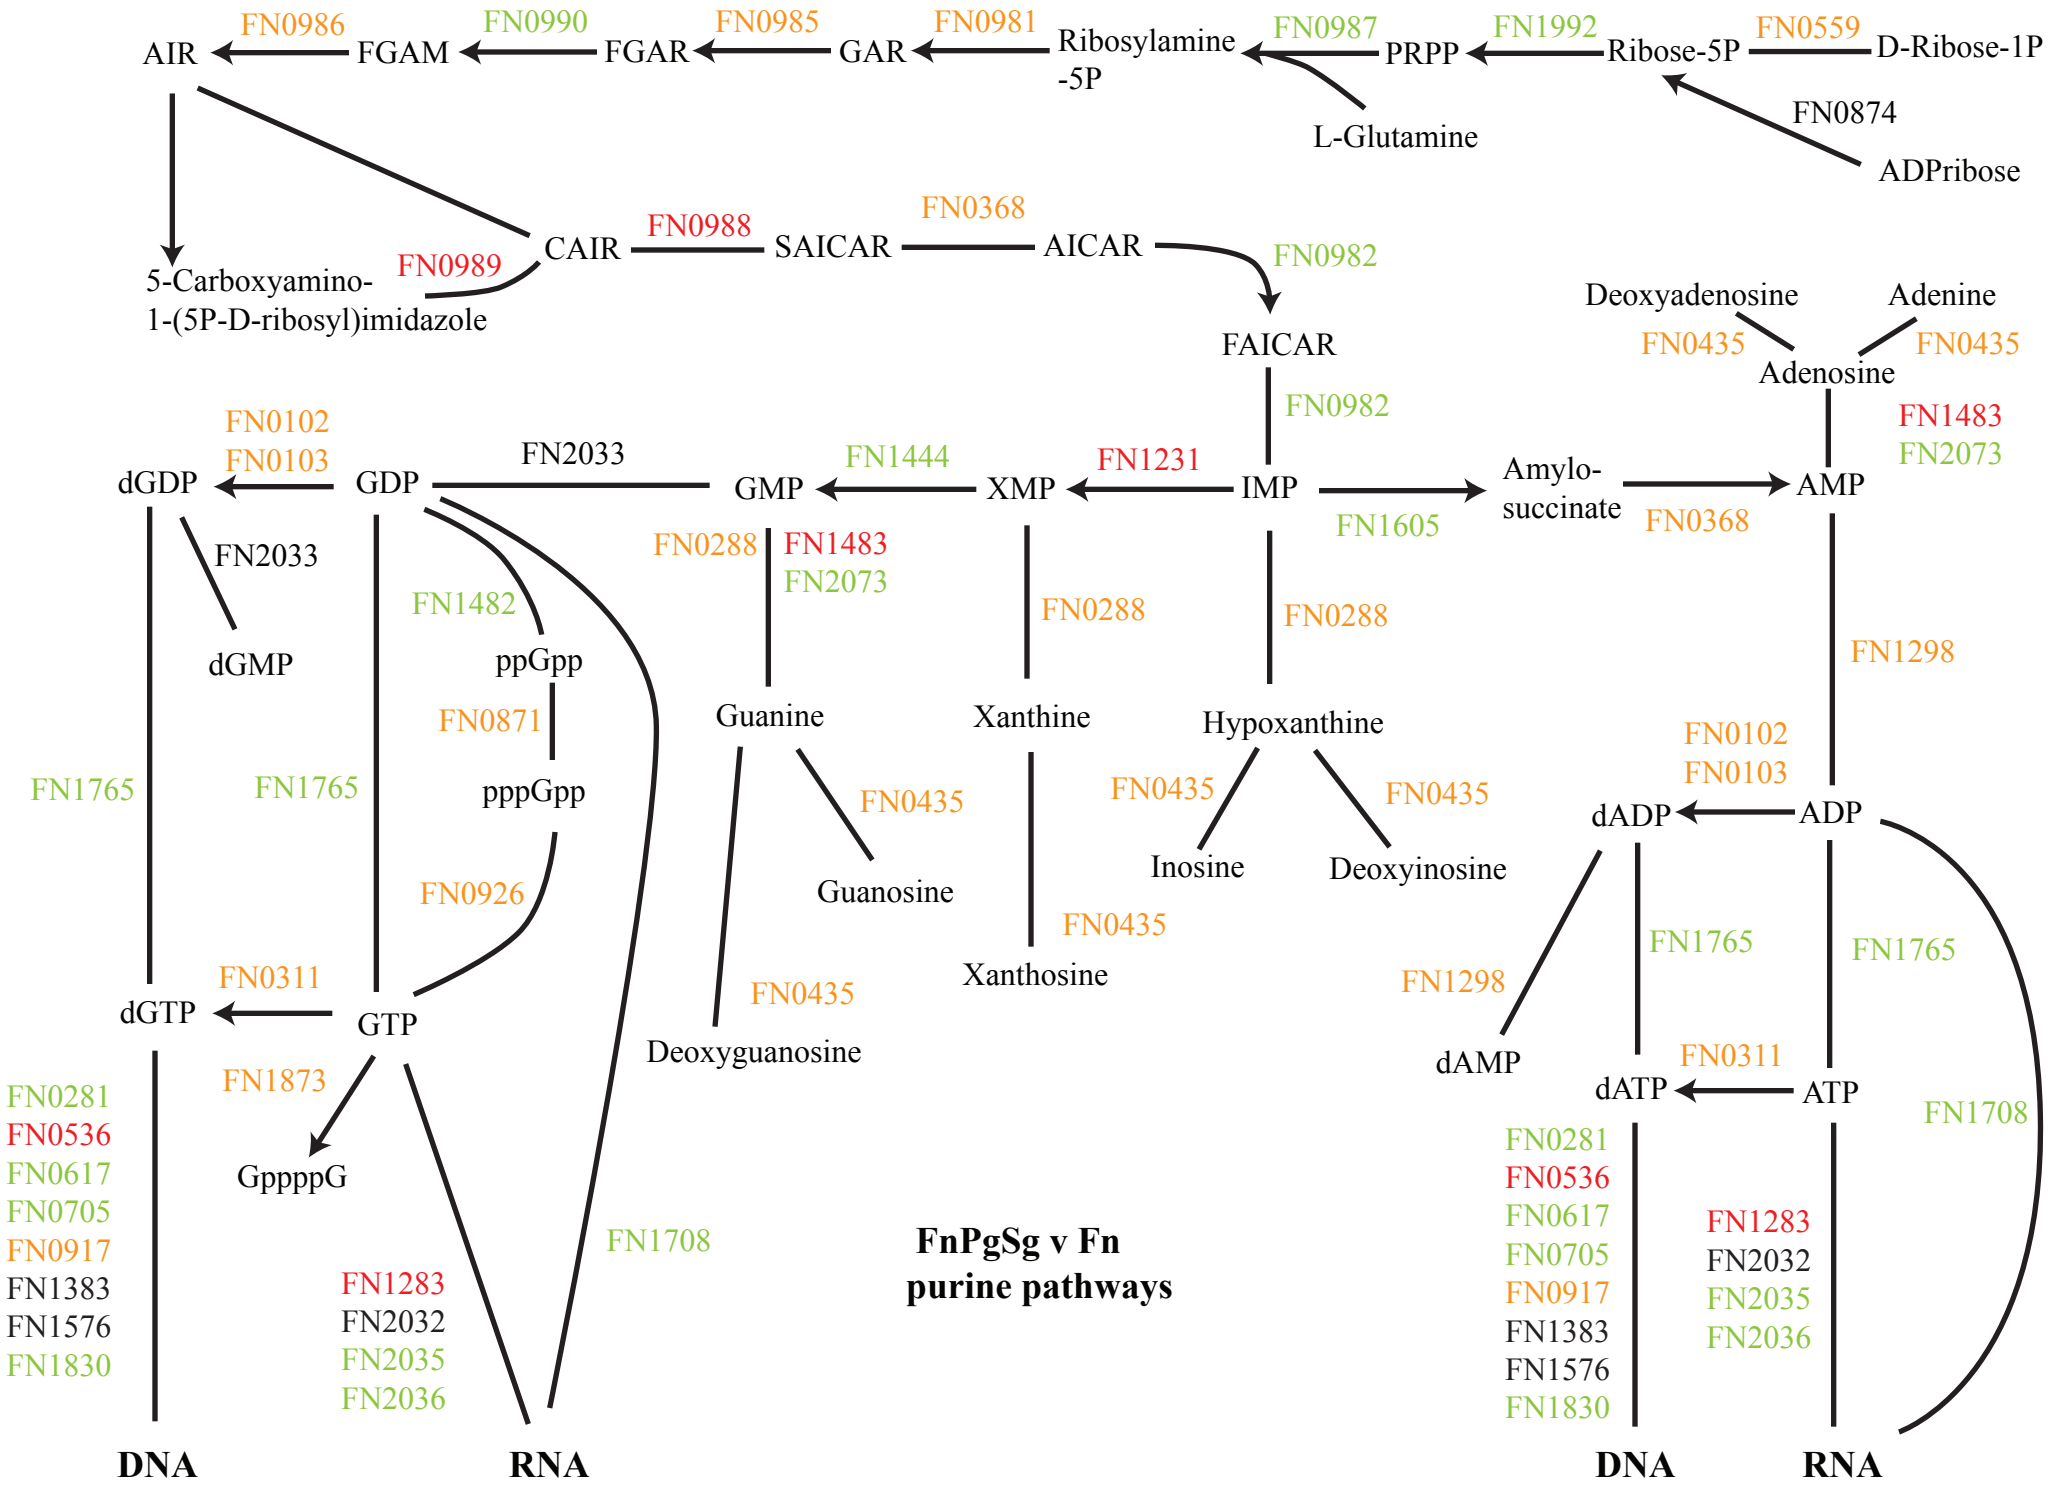

**FnPgSg v Fn purine pathways**

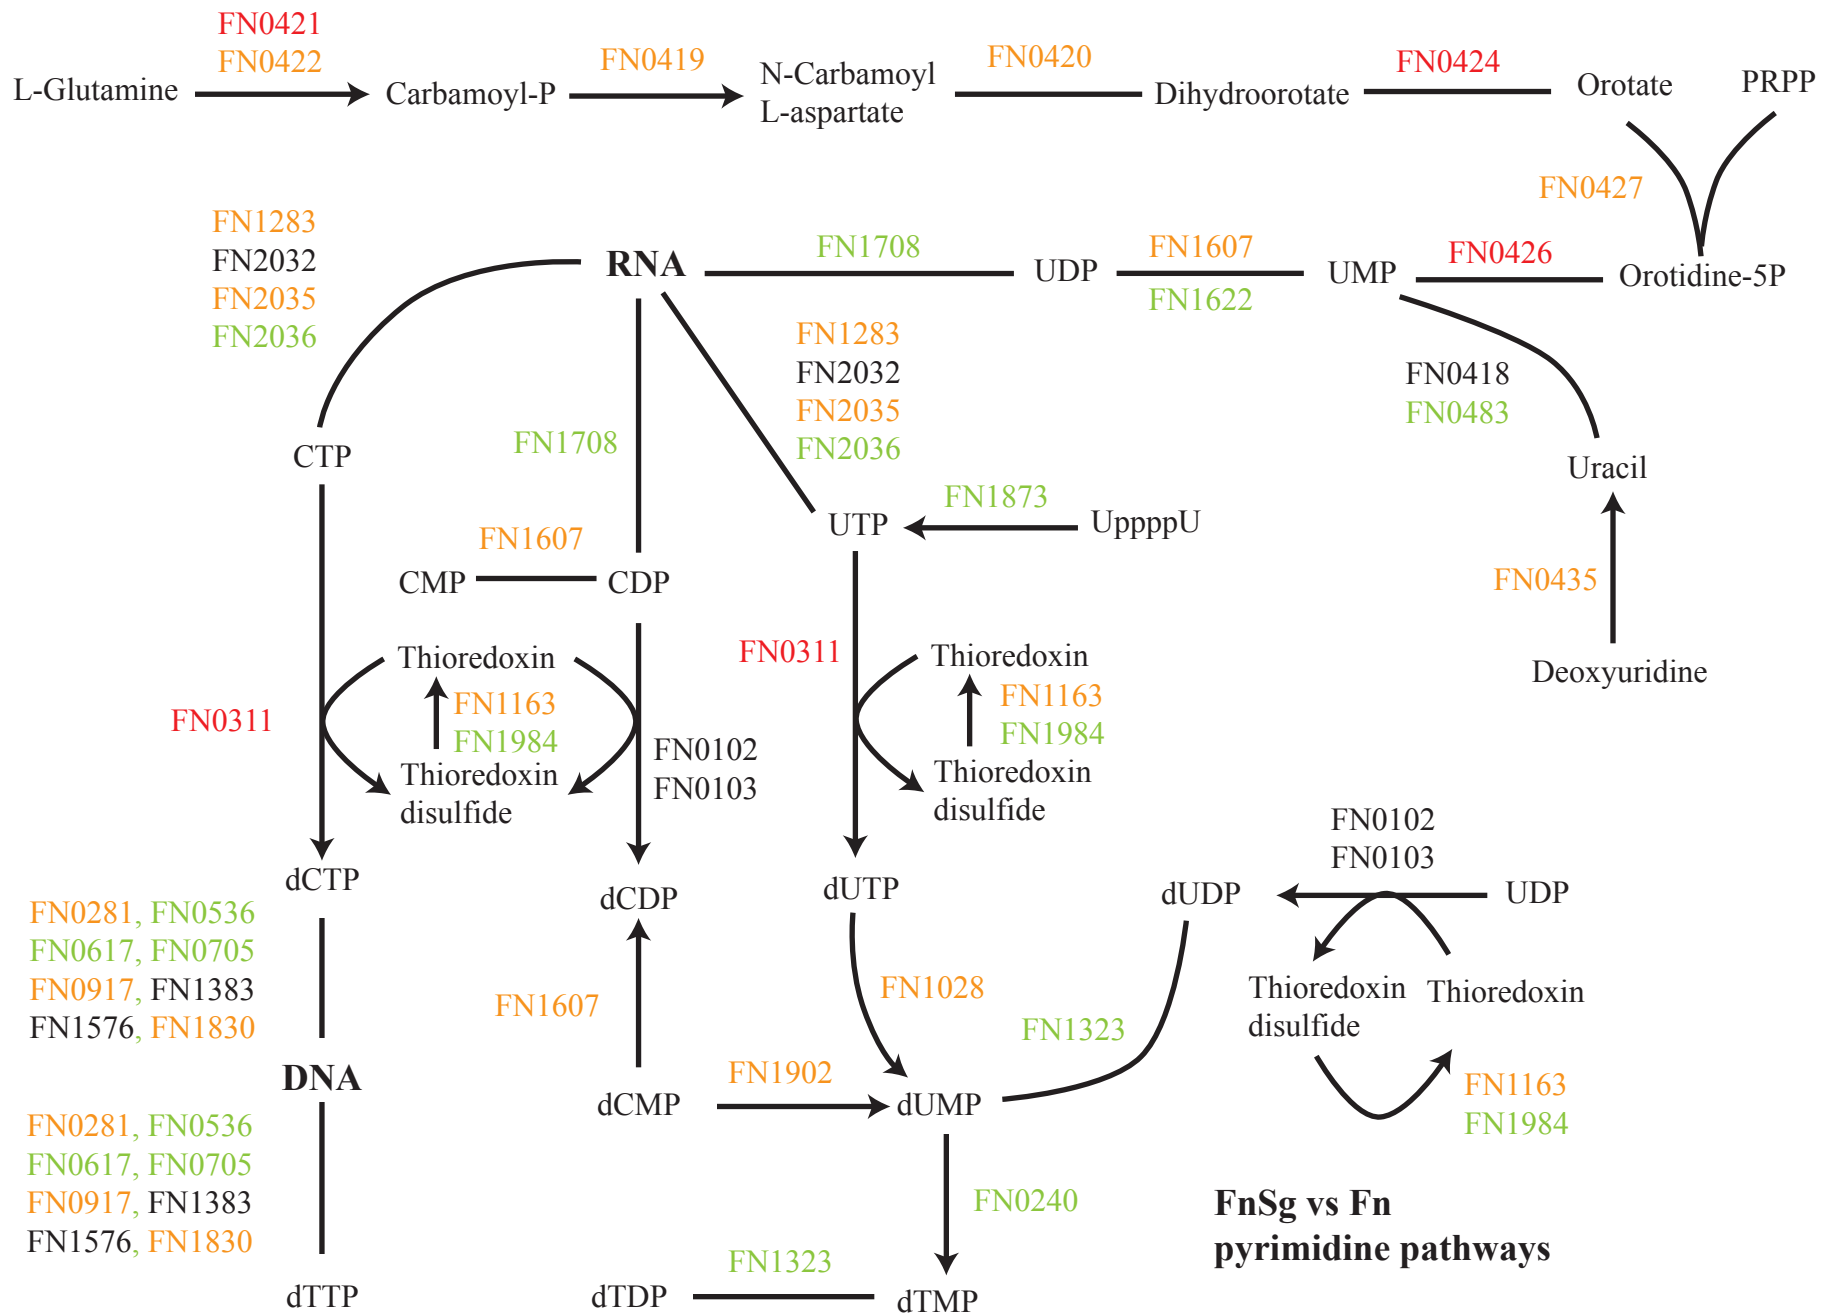

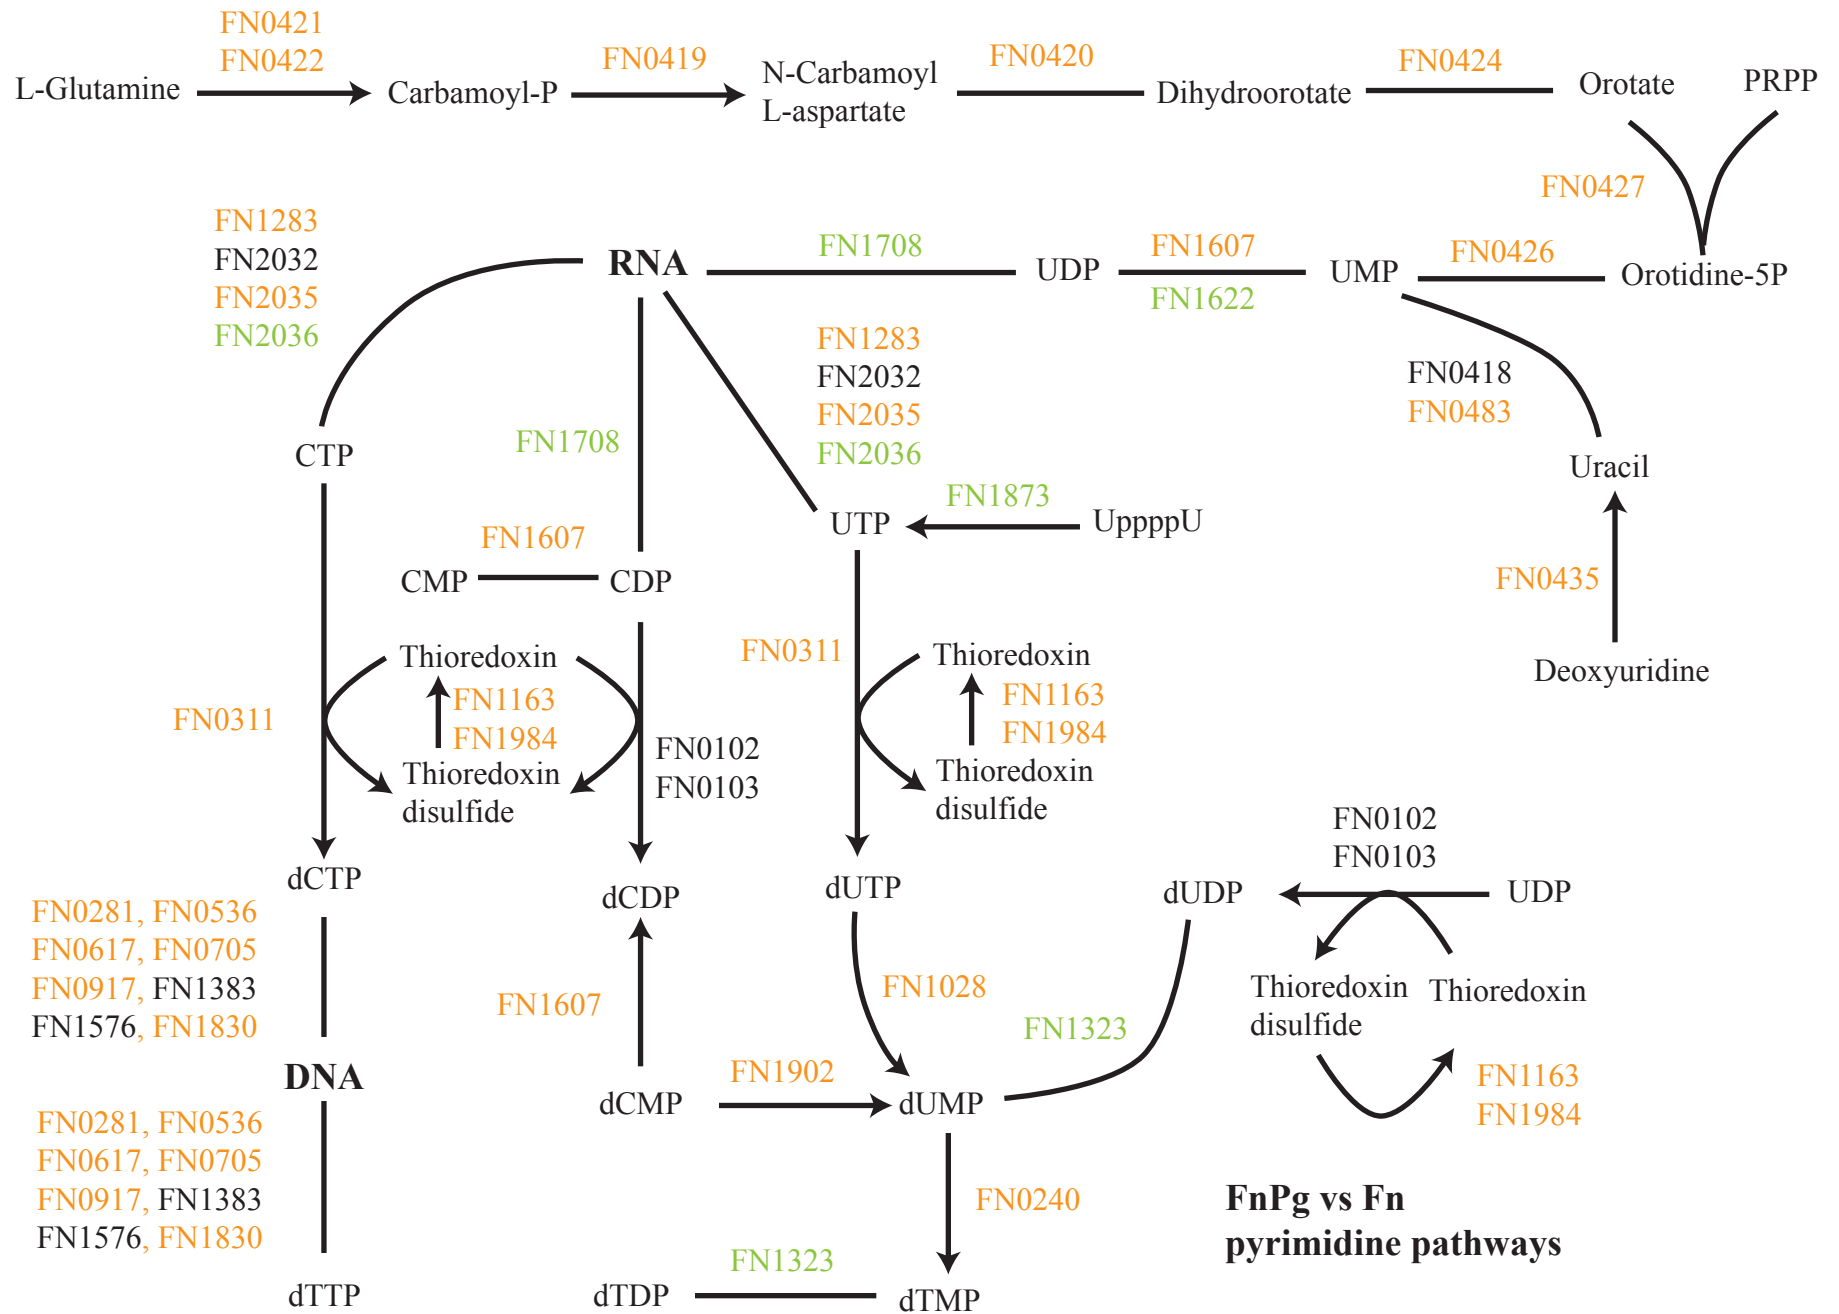

**FnPg vs Fn pyrimidine pathways**

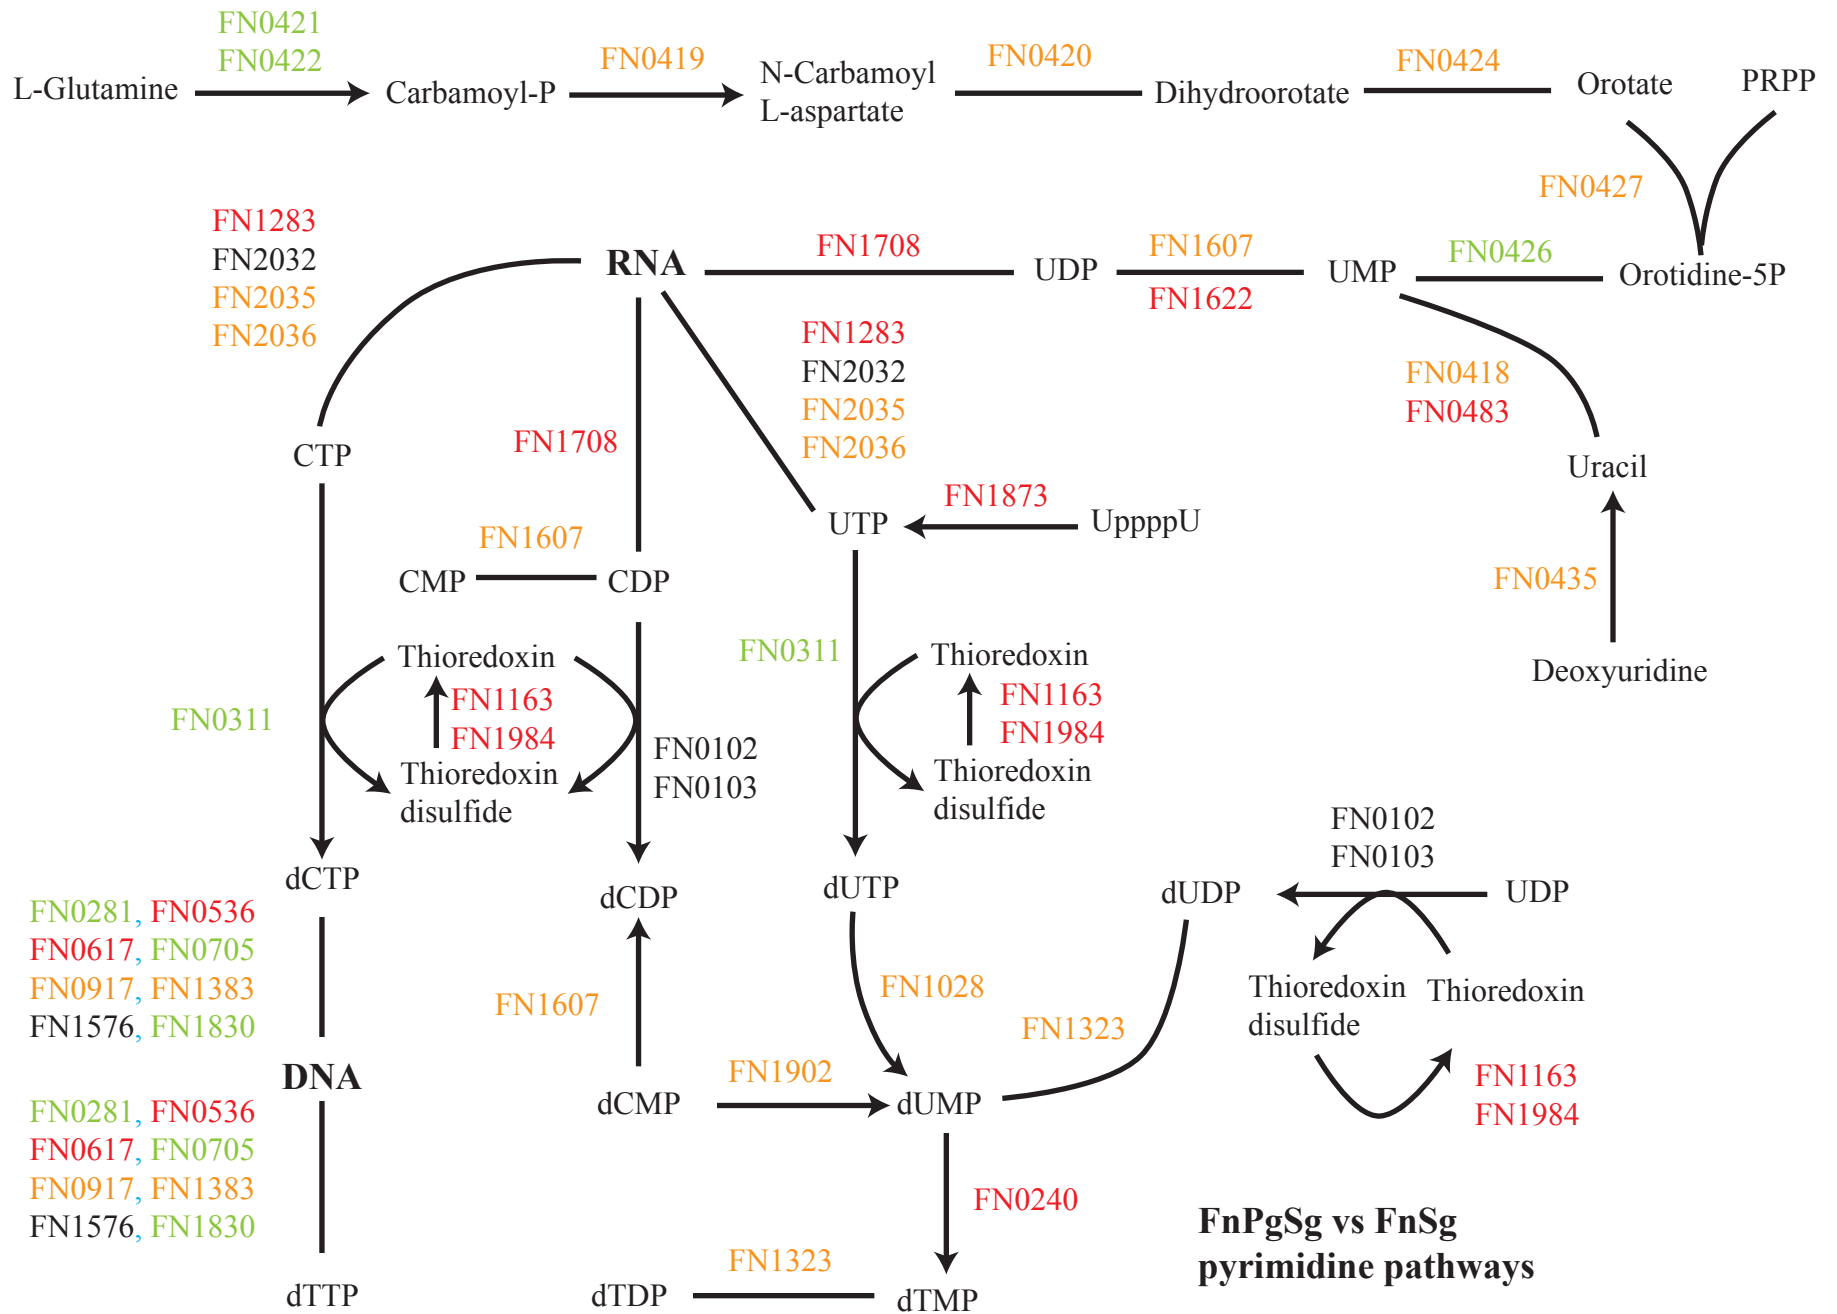

**FnPgSg vs FnSg pyrimidine pathways**

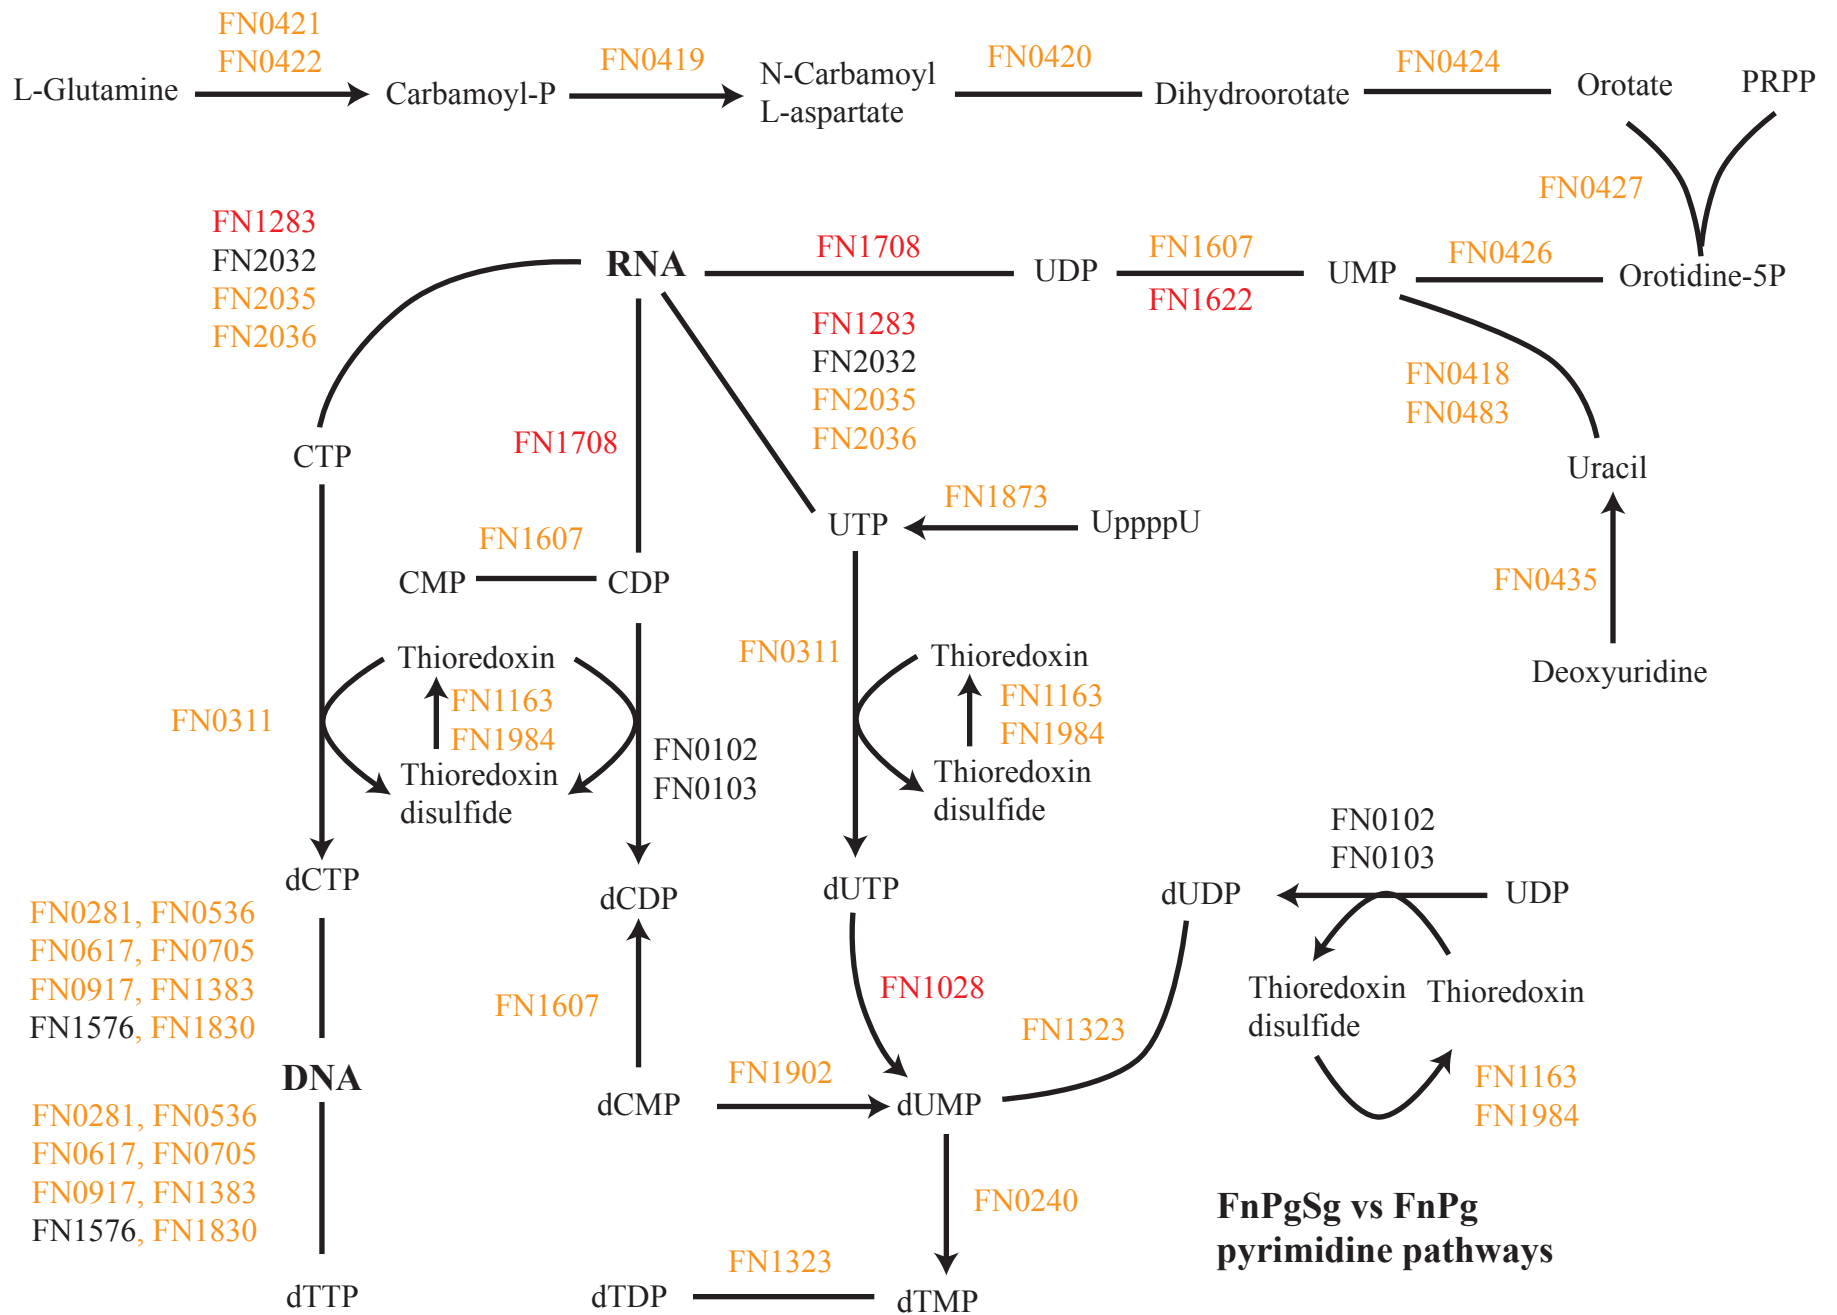

**FnPgSg vs FnPg pyrimidine pathways**

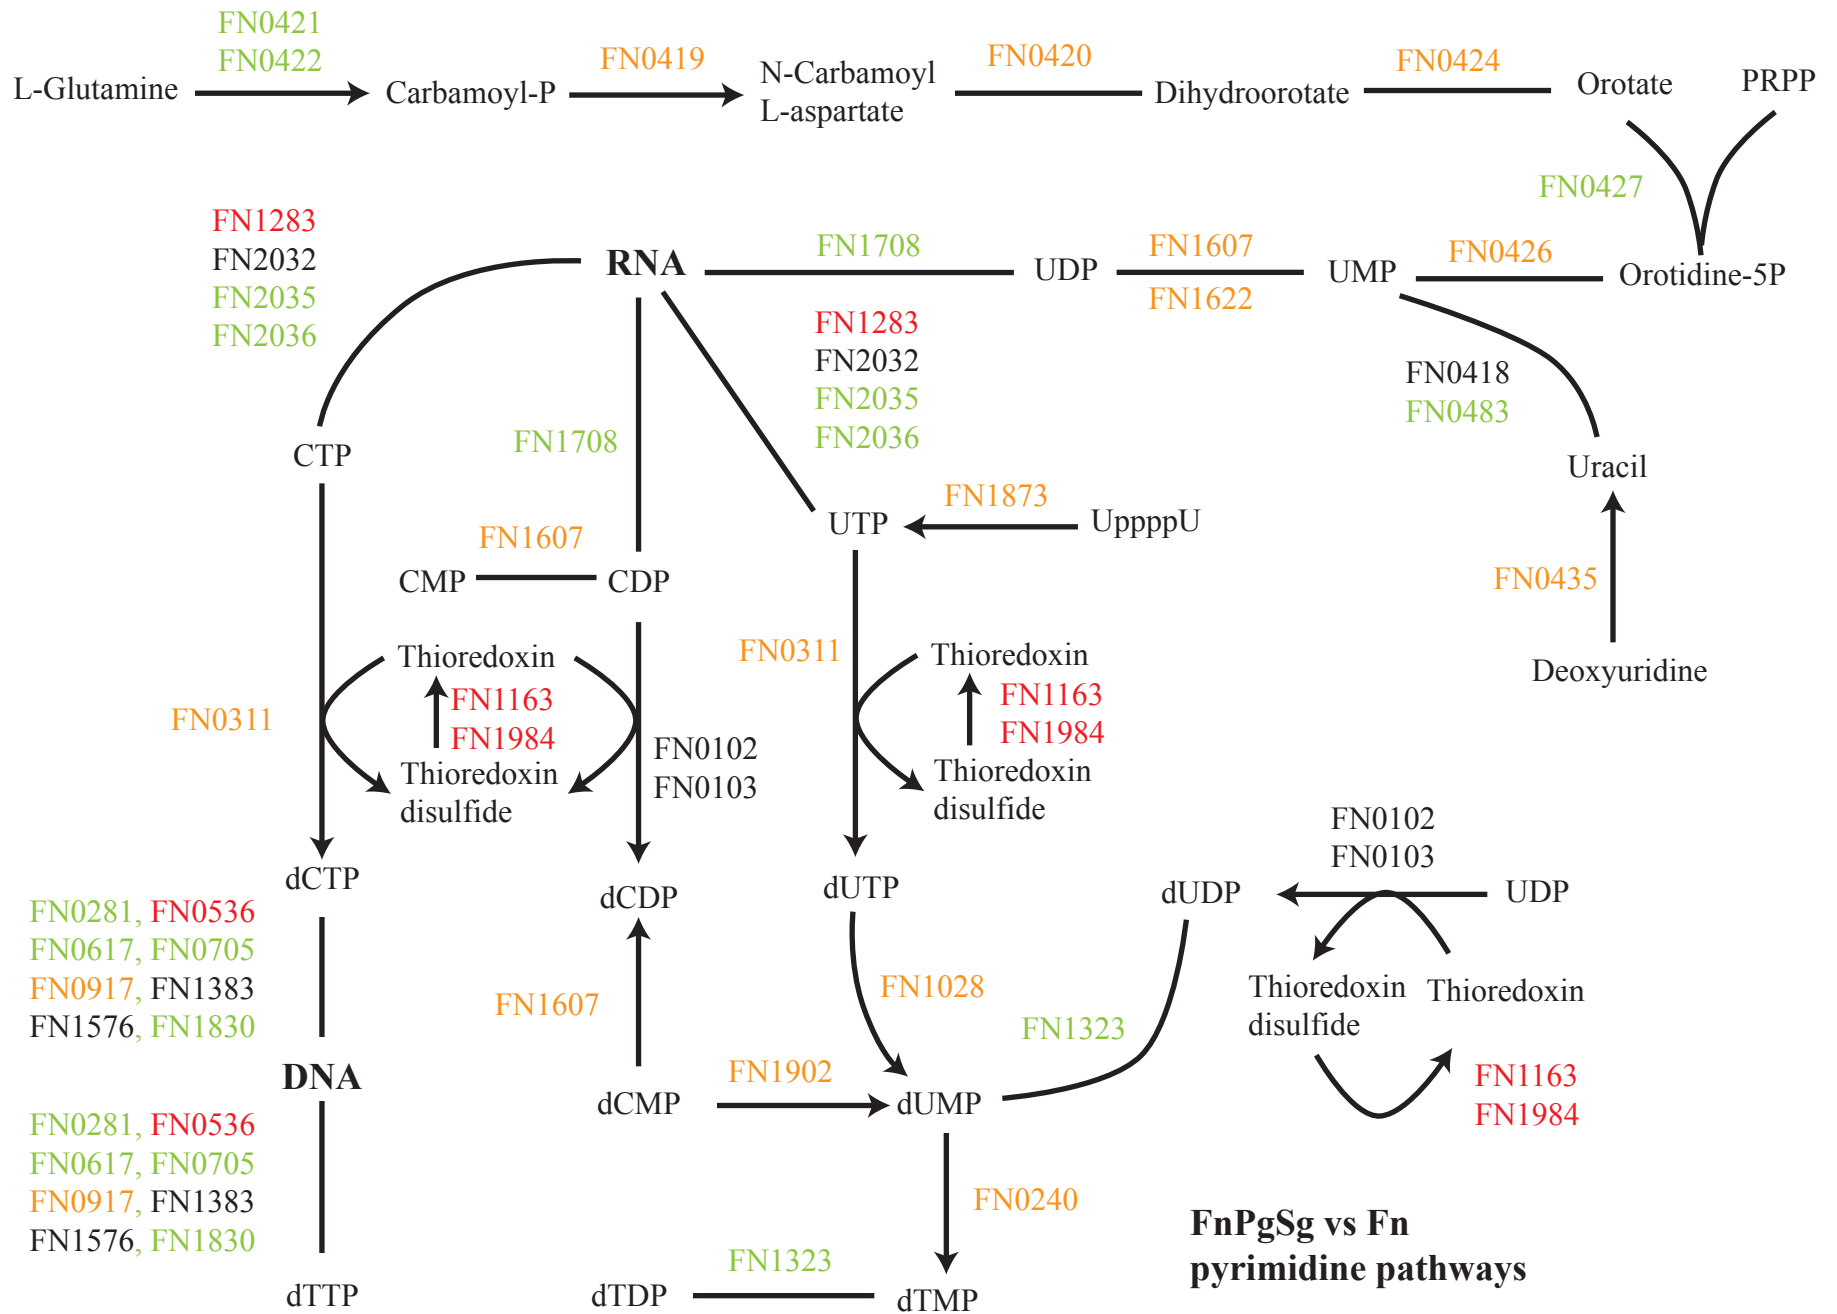

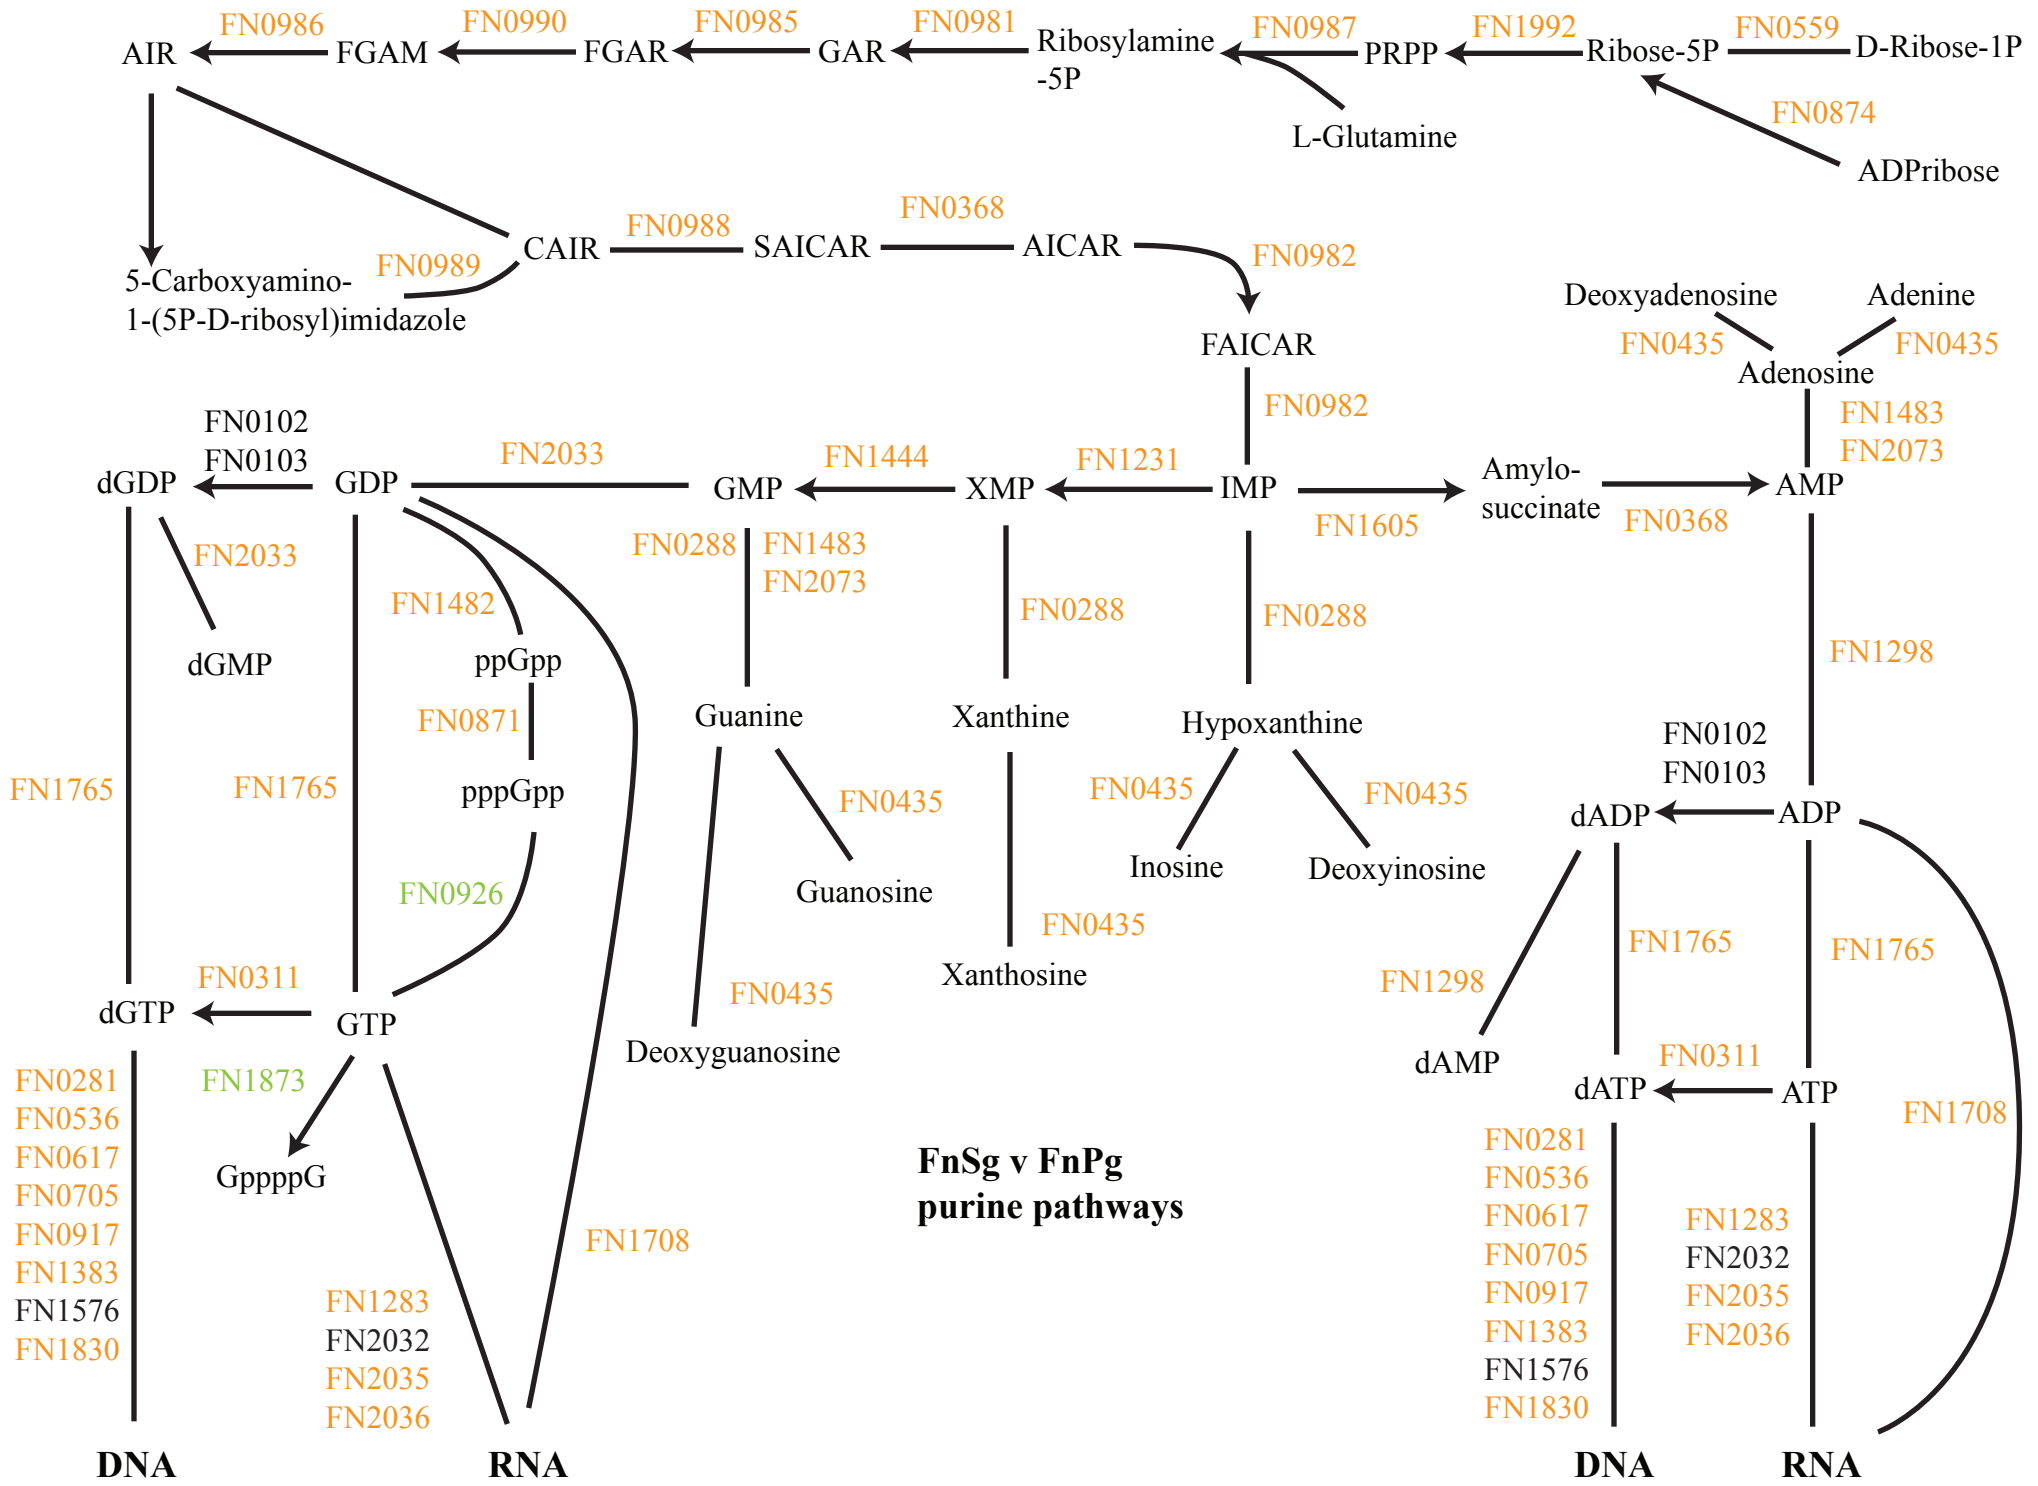

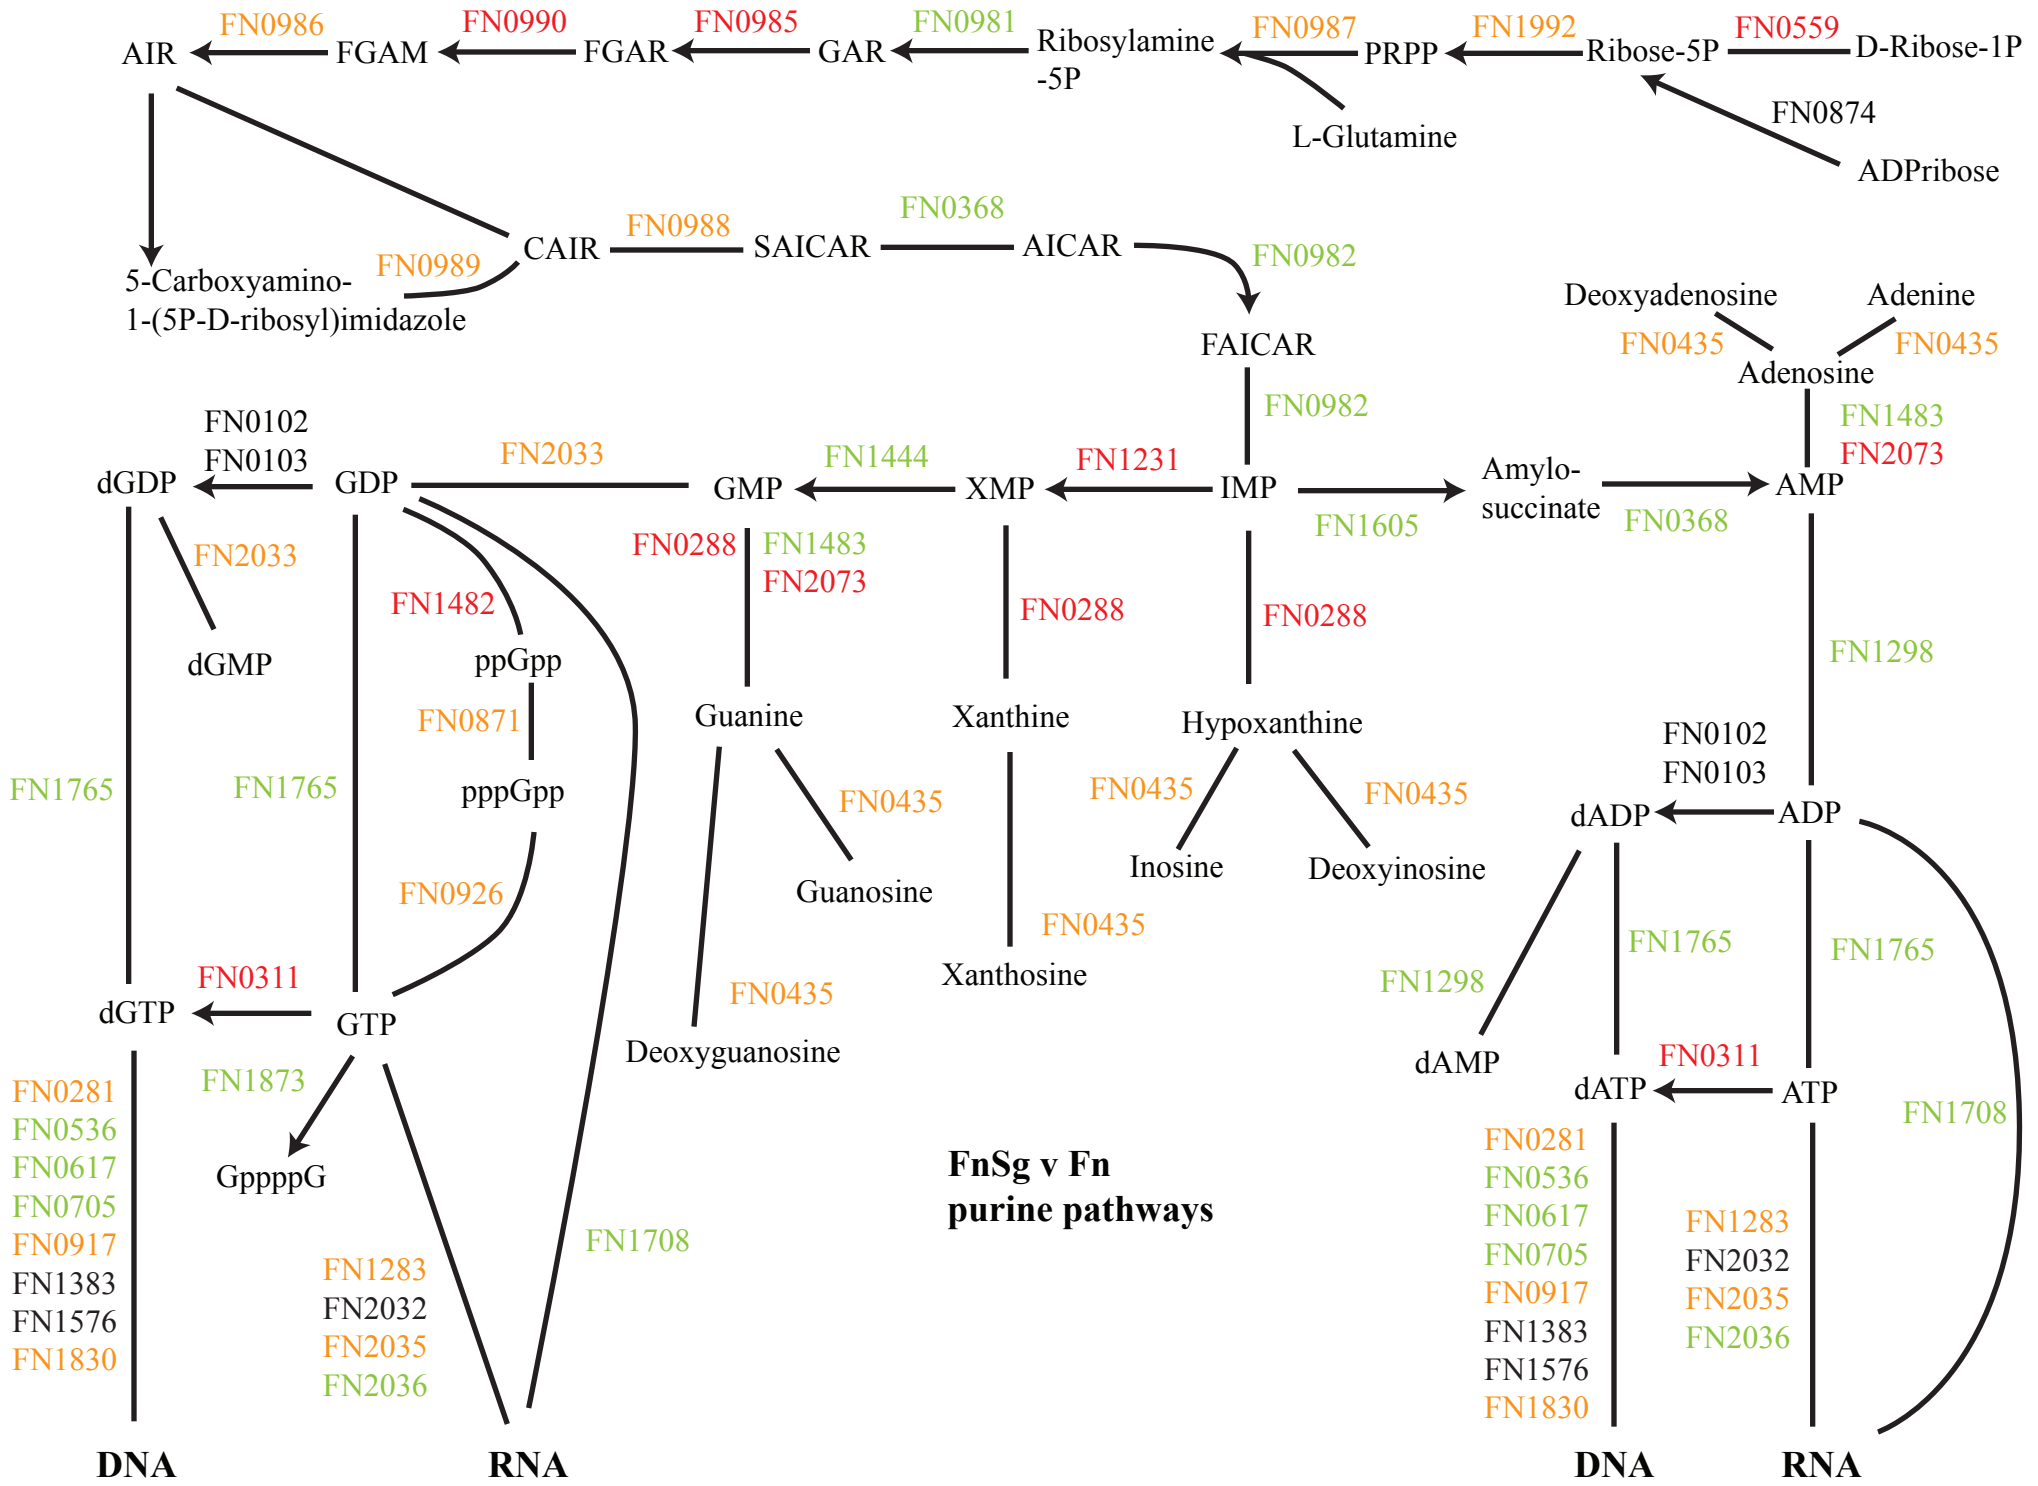



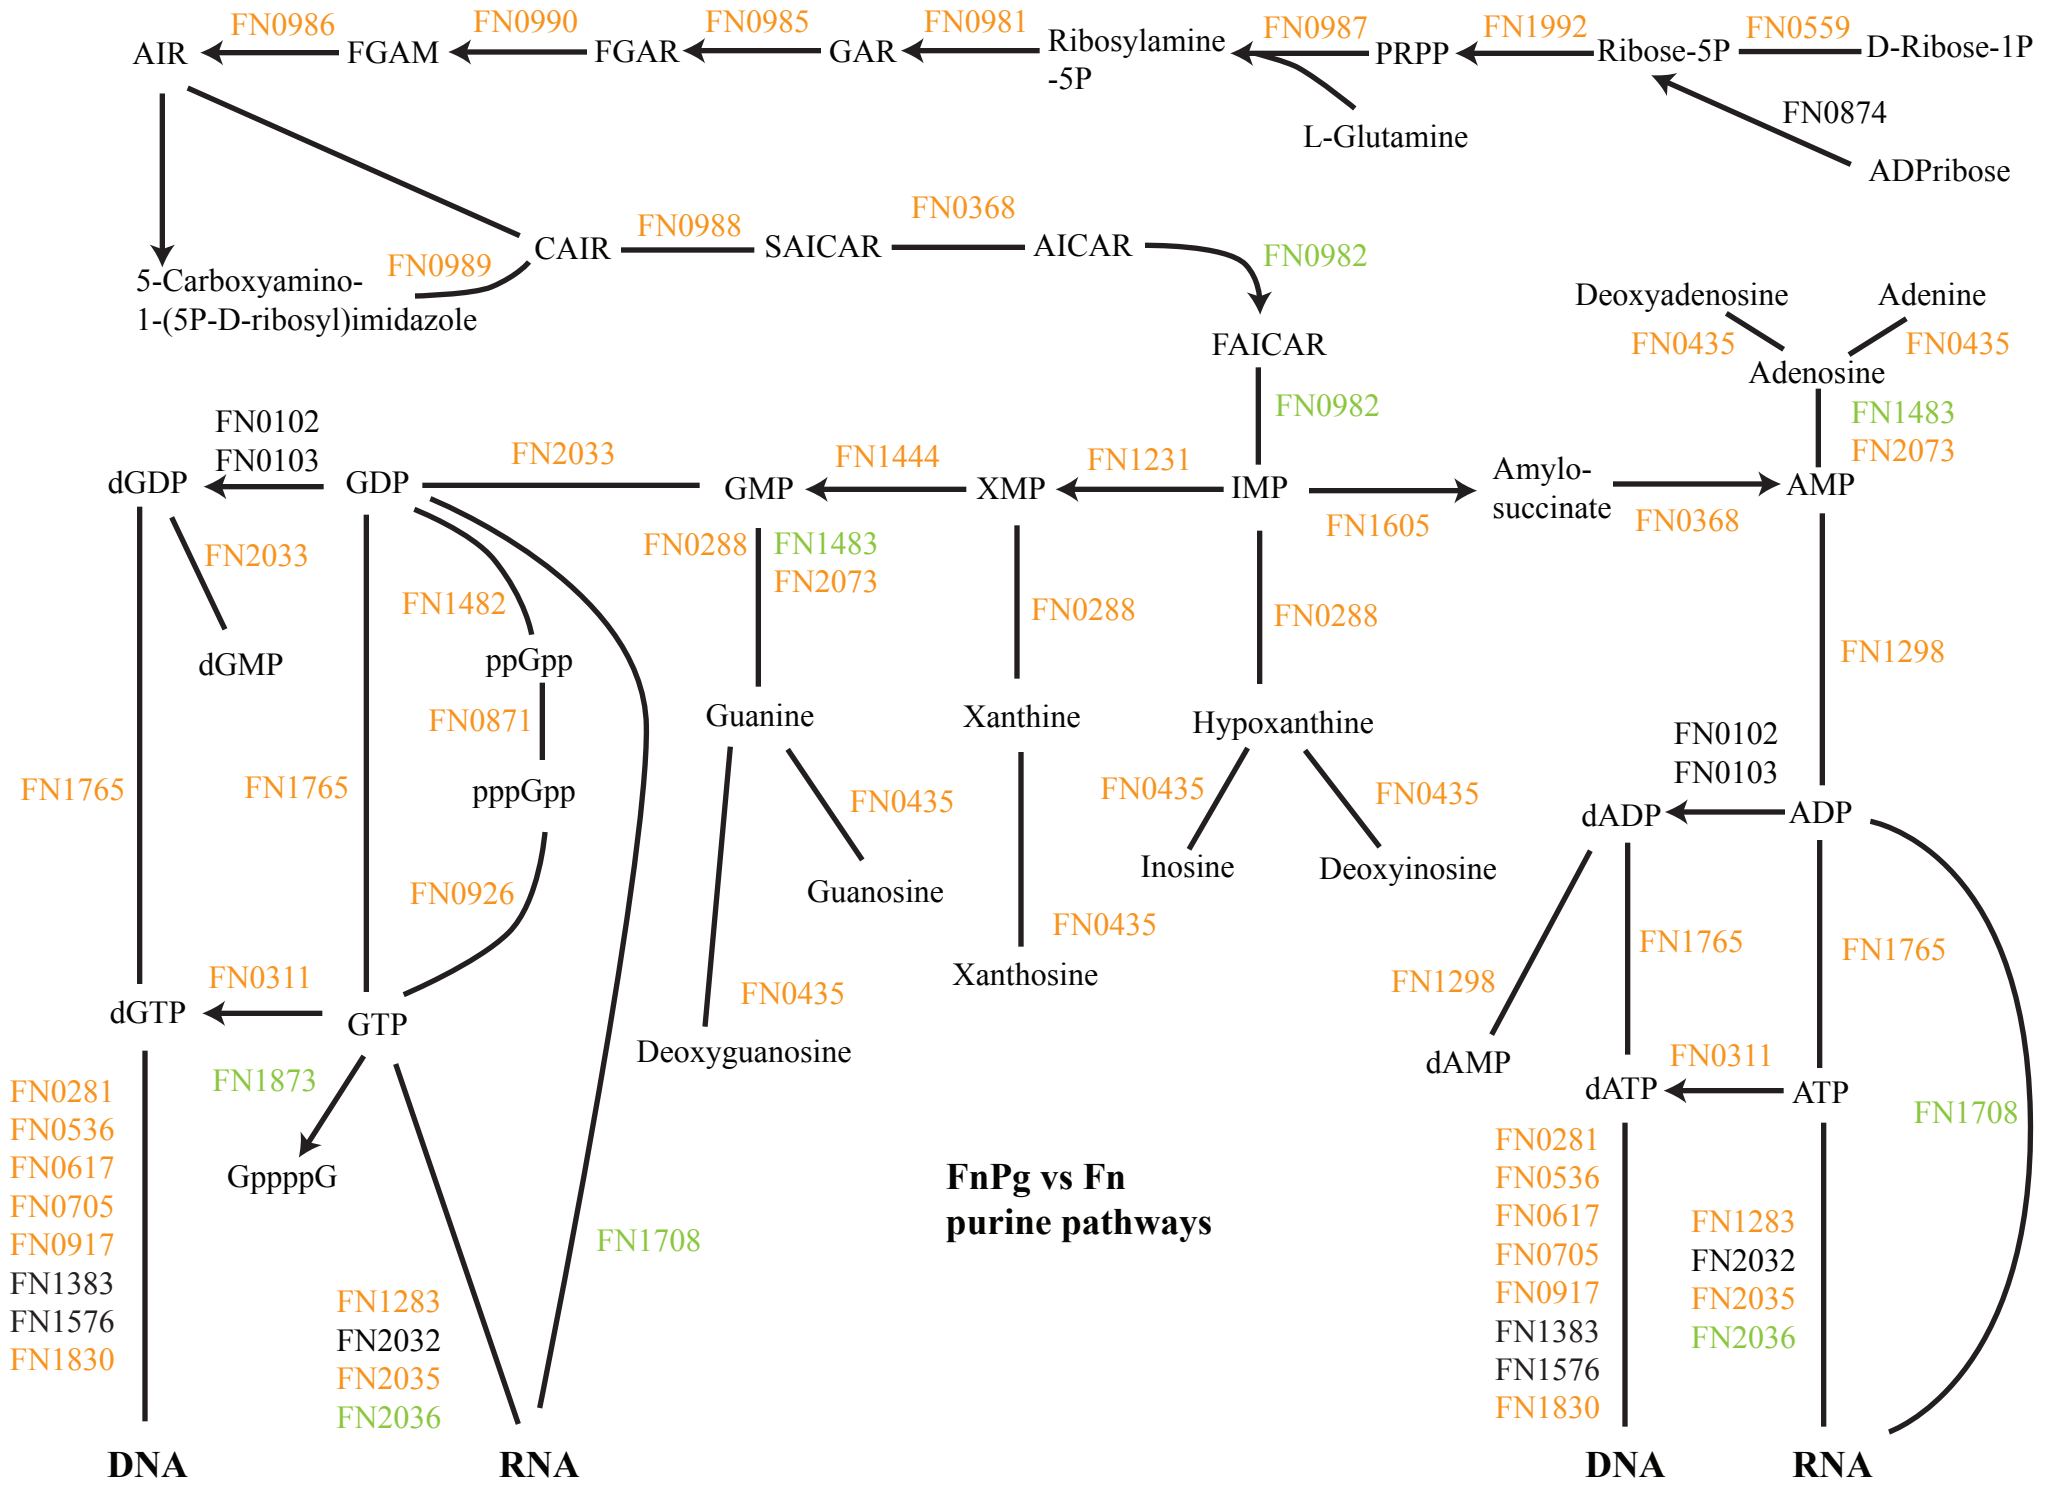



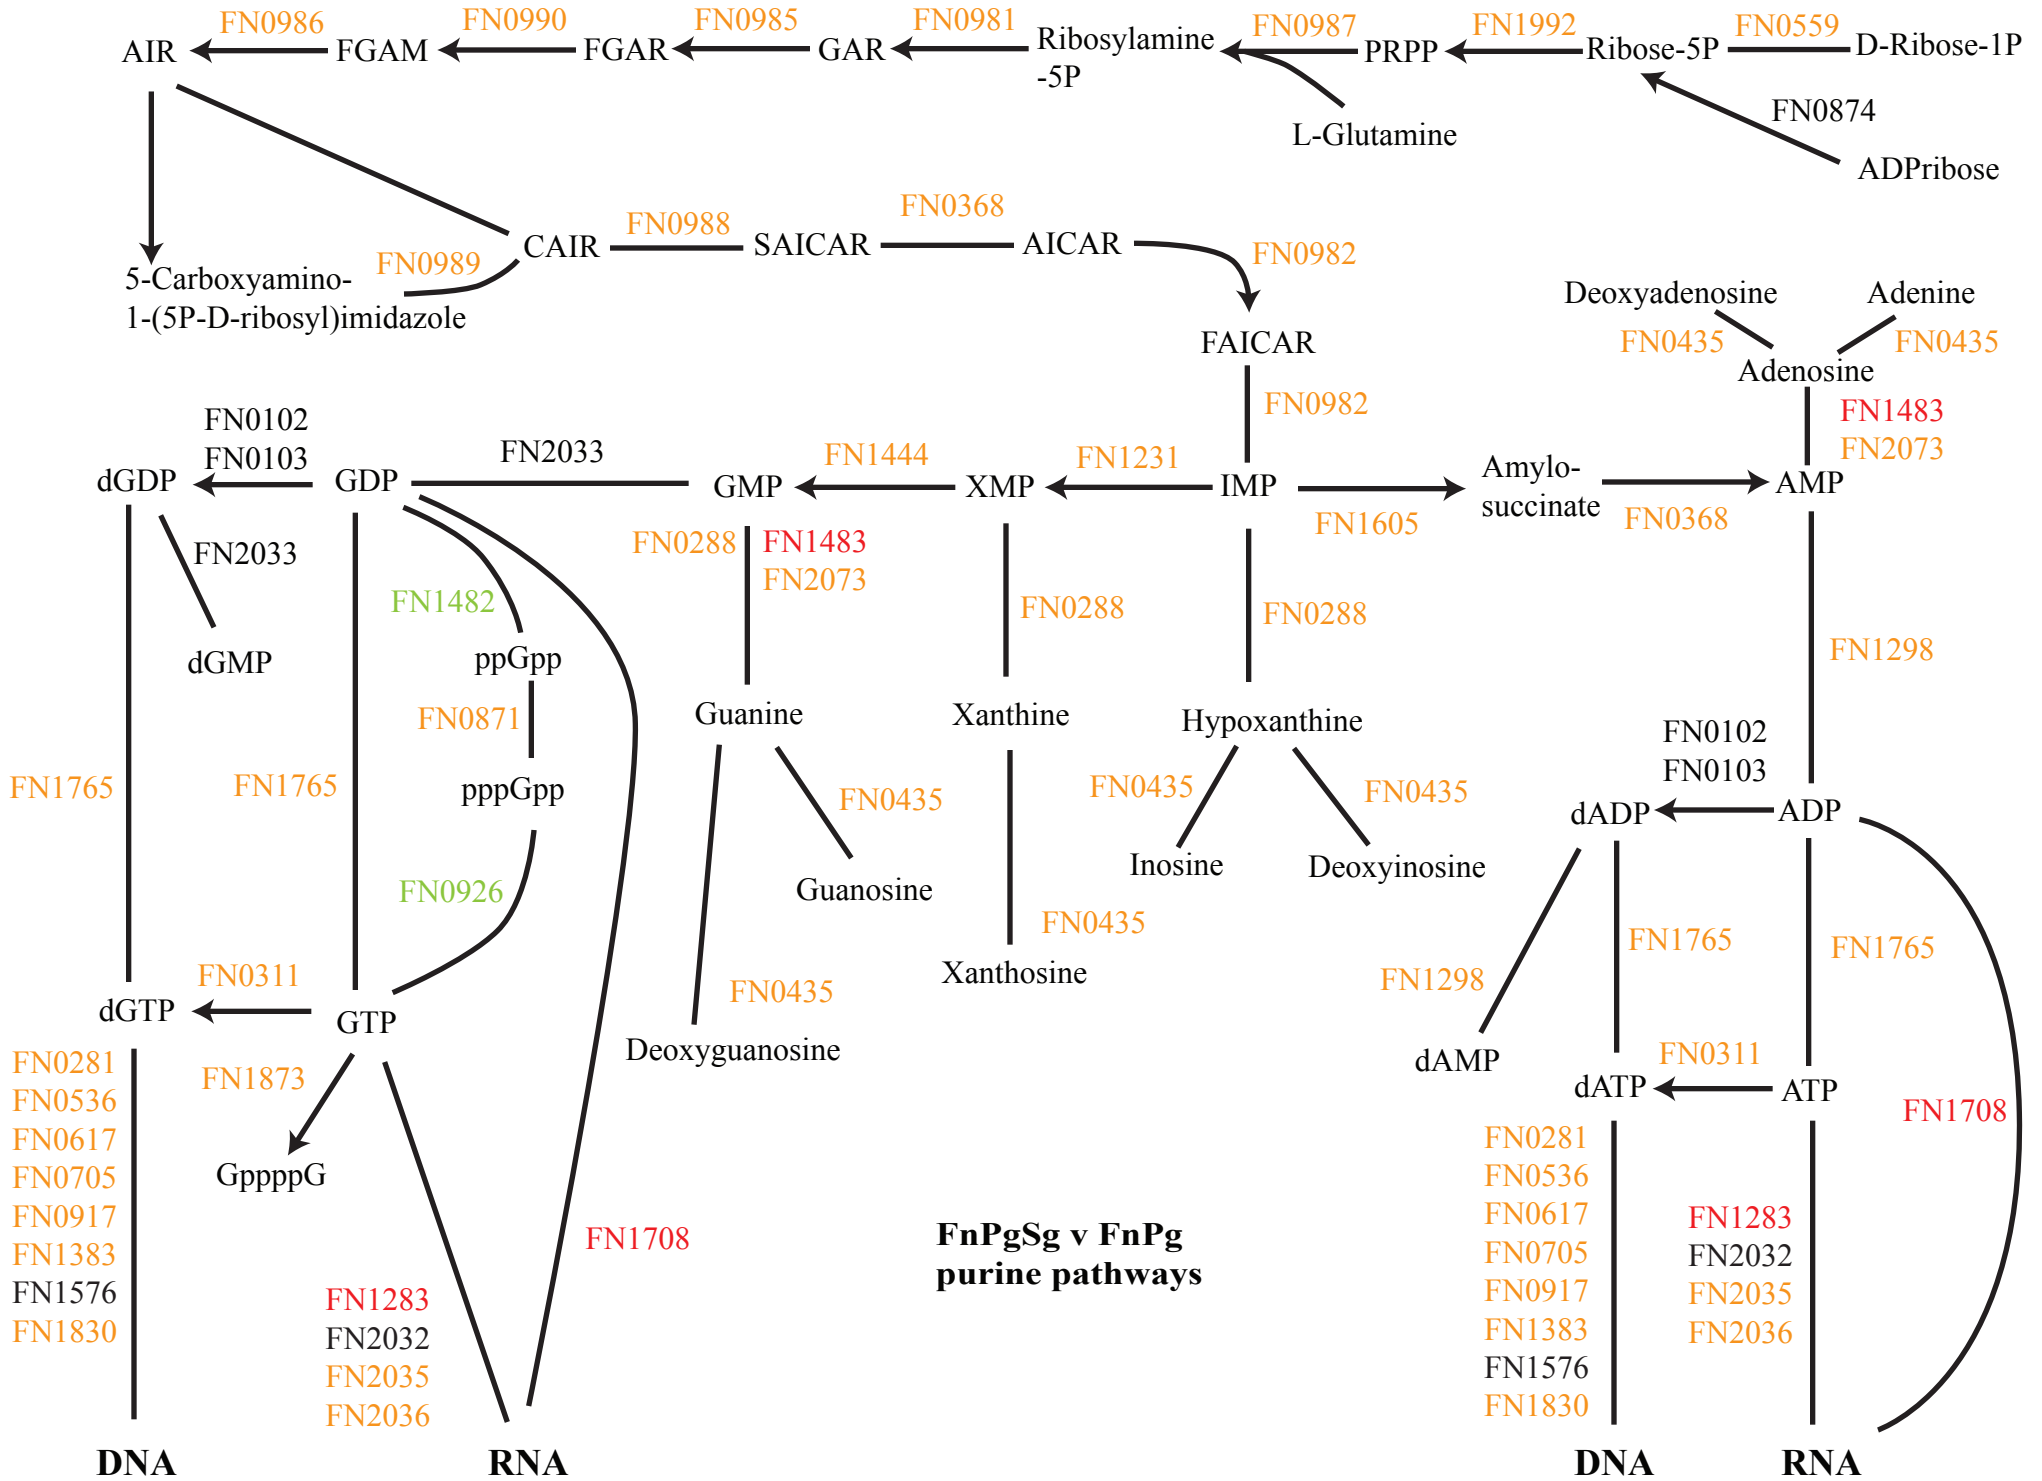

Supplement: mbo30003-0729-sd1.pdf [file mbo30003-0729-sd1.pdf]
