# Supplementary material for: Proteomics of Fusobacterium nucleatum within a model developing oral microbial community
Source: PubMed Central journal article supplement (PMC4234264; doi:10.1002/mbo3.204), 2014-08-25
Supplement: mbo30003-0729-sd3.pdf [file mbo30003-0729-sd3.pdf]

Fn Summary Table FnPg vs Fn FnSg vs Fn FnPgSg vs Fn FnPgSg vs FnPg FnSg vs FnPg FnPgSg vs FnSg Fn Coverage

| ORF                                                            | FnPg vs Fn |        |          |          | FnSg vs Fn |        |          |          | FnPgSg vs Fn |        |          |          | FnPgSg vs FnPg |        |          |          | FnSg vs FnPg |        |          |          | FnPgSg vs FnSg |        |          |          | Log <sub>2</sub> Ratios |     |       |       |    |    |    |   |   |   |   |  |
|----------------------------------------------------------------|------------|--------|----------|----------|------------|--------|----------|----------|--------------|--------|----------|----------|----------------|--------|----------|----------|--------------|--------|----------|----------|----------------|--------|----------|----------|-------------------------|-----|-------|-------|----|----|----|---|---|---|---|--|
|                                                                | Ratio      | Sum    | q-Val    | p-Val    | Ratio      | Sum    | q-Val    | p-Val    | Ratio        | Sum    | q-Val    | p-Val    | Ratio          | Sum    | q-Val    | p-Val    | Ratio        | Sum    | q-Val    | p-Val    | Ratio          | Sum    | q-Val    | p-Val    | Ratio                   | Sum | q-Val | p-Val | -6 | -4 | -2 | 0 | 2 | 4 | 6 |  |
| <b>FN0001</b>                                                  | -0.861     | 8.211  | 5.373e-2 | 9.891e-2 | -0.721     | 8.536  | 3.344e-3 | 1.286e-2 | -1.995       | 6.873  | 5.464e-4 | 1.117e-3 | -1.135         | 6.216  | 1e-1     | 2.195e-1 | 0.140        | 7.675  | 3.783e-1 | 7.944e-1 | -1.275         | 6.541  | 7.573e-4 | 1.334e-3 |                         |     |       |       |    |    |    |   |   |   |   |  |
| AAL94214.1  Chromosomal replication initiator protein dnaA     |            |        |          |          |            |        |          |          |              |        |          |          |                |        |          |          |              |        |          |          |                |        |          |          |                         |     |       |       |    |    |    |   |   |   |   |  |
| <b>FN0004</b>                                                  | -0.611     | 11.841 |          |          | -1.041     | 11.595 | 1.344e-4 | 2.314e-4 | 0.743        | 12.991 | 1.429e-2 | 6.168e-2 | 1.354          | 12.583 |          |          | -0.430       | 10.984 |          |          | 1.784          | 12.338 | 4.439e-3 | 1.286e-2 |                         |     |       |       |    |    |    |   |   |   |   |  |
| AAL94217.1  Inner membrane protein                             |            |        |          |          |            |        |          |          |              |        |          |          |                |        |          |          |              |        |          |          |                |        |          |          |                         |     |       |       |    |    |    |   |   |   |   |  |
| <b>FN0005</b>                                                  | -2.353     | 9.381  | 1.156e-3 | 5.965e-4 | -1.546     | 10.372 | 4.85e-4  | 1.179e-3 | 0.049        | 11.579 | 1.256e-1 | 7.273e-1 | 2.402          | 9.430  | 1.077e-4 | 9.734e-6 | 0.807        | 8.020  | 9.688e-2 | 8.044e-2 | 1.595          | 10.422 | 8.613e-5 | 7.124e-5 |                         |     |       |       |    |    |    |   |   |   |   |  |
| AAL94218.1  Jag protein                                        |            |        |          |          |            |        |          |          |              |        |          |          |                |        |          |          |              |        |          |          |                |        |          |          |                         |     |       |       |    |    |    |   |   |   |   |  |
| <b>FN0006</b>                                                  | -0.118     | 8.902  |          |          | 0.271      | 9.476  | 6.231e-3 | 2.671e-2 | -0.914       | 7.902  | 1.152e-3 | 2.895e-3 | -0.797         | 7.988  |          |          | 0.389        | 9.358  |          |          | -1.186         | 8.562  | 7.973e-6 | 1.958e-6 |                         |     |       |       |    |    |    |   |   |   |   |  |
| AAL94219.1  Thiophene and furan oxidation protein THDF         |            |        |          |          |            |        |          |          |              |        |          |          |                |        |          |          |              |        |          |          |                |        |          |          |                         |     |       |       |    |    |    |   |   |   |   |  |
| <b>FN0007</b>                                                  | -1.490     | 8.166  | 7.004e-4 | 2.603e-4 | -0.993     | 8.847  | 3.101e-3 | 1.17e-2  | -1.690       | 7.762  | 1.687e-4 | 2.265e-4 | -0.200         | 6.476  | 1.591e-1 | 4.339e-1 | 0.497        | 7.357  | 1.598e-1 | 2.137e-1 | -0.696         | 7.157  | 2.992e-2 | 1.242e-1 |                         |     |       |       |    |    |    |   |   |   |   |  |
| AAL94220.1  Glucose inhibited division protein A               |            |        |          |          |            |        |          |          |              |        |          |          |                |        |          |          |              |        |          |          |                |        |          |          |                         |     |       |       |    |    |    |   |   |   |   |  |
| <b>FN0008</b>                                                  |            |        |          |          |            |        |          |          |              |        |          |          |                |        |          |          | -0.559       | 7.026  |          |          |                |        |          |          |                         |     |       |       |    |    |    |   |   |   |   |  |
| AAL94221.1  Quinolinate synthetase A                           |            |        |          |          |            |        |          |          |              |        |          |          |                |        |          |          |              |        |          |          |                |        |          |          |                         |     |       |       |    |    |    |   |   |   |   |  |
| <b>FN0009</b>                                                  |            |        |          |          |            |        |          |          |              |        |          |          |                |        |          |          | -0.306       | 9.594  |          |          |                |        |          |          |                         |     |       |       |    |    |    |   |   |   |   |  |
| AAL94222.1  L-aspartate oxidase                                |            |        |          |          |            |        |          |          |              |        |          |          |                |        |          |          |              |        |          |          |                |        |          |          |                         |     |       |       |    |    |    |   |   |   |   |  |
| <b>FN0017</b>                                                  |            |        |          |          | -0.525     | 5.744  | 3.621e-3 | 1.424e-2 |              |        |          |          |                |        |          |          |              |        |          |          |                |        |          |          |                         |     |       |       |    |    |    |   |   |   |   |  |
| AAL94230.1  Hypothetical protein                               |            |        |          |          |            |        |          |          |              |        |          |          |                |        |          |          |              |        |          |          |                |        |          |          |                         |     |       |       |    |    |    |   |   |   |   |  |
| <b>FN0018</b>                                                  | -1.322     | 10.369 |          |          | -1.340     | 10.536 | 7.478e-5 | 1.095e-4 | -0.591       | 10.897 | 1.44e-4  | 1.826e-4 | 0.731          | 9.778  |          |          | -0.018       | 9.214  |          |          | 0.749          | 9.945  | 1.226e-4 | 1.125e-4 |                         |     |       |       |    |    |    |   |   |   |   |  |
| AAL94231.1  Hypothetical protein                               |            |        |          |          |            |        |          |          |              |        |          |          |                |        |          |          |              |        |          |          |                |        |          |          |                         |     |       |       |    |    |    |   |   |   |   |  |
| <b>FN0019</b>                                                  |            |        |          |          | 0.493      | 4.631  |          |          | 0.483        | 4.232  |          |          |                |        |          |          |              |        |          |          | -0.010         | 5.114  |          |          |                         |     |       |       |    |    |    |   |   |   |   |  |
| AAL94232.1  Transcription-repair coupling factor               |            |        |          |          |            |        |          |          |              |        |          |          |                |        |          |          |              |        |          |          |                |        |          |          |                         |     |       |       |    |    |    |   |   |   |   |  |
| <b>FN0021</b>                                                  |            |        |          |          |            |        |          |          |              |        |          |          |                |        |          |          |              |        |          |          |                |        |          |          |                         |     |       |       |    |    |    |   |   |   |   |  |
| AAL94234.1  4-diphosphocytidyl-2-C-methyl-D-erythritol kinase  |            |        |          |          |            |        |          |          |              |        |          |          |                |        |          |          |              |        |          |          |                |        |          |          |                         |     |       |       |    |    |    |   |   |   |   |  |
| <b>FN0022</b>                                                  | 0.356      | 12.744 | 2.373e-1 | 6.936e-1 | -2.619     | 9.954  | 5.088e-7 | 5.976e-8 | -0.906       | 11.279 | 2.08e-3  | 6.345e-3 | -1.261         | 11.838 | 1.31e-1  | 3.315e-1 | -2.975       | 10.310 | 1.469e-1 | 1.814e-1 | 1.713          | 9.048  | 4.072e-3 | 1.141e-2 |                         |     |       |       |    |    |    |   |   |   |   |  |
| AAL94235.1  Hypothetical protein                               |            |        |          |          |            |        |          |          |              |        |          |          |                |        |          |          |              |        |          |          |                |        |          |          |                         |     |       |       |    |    |    |   |   |   |   |  |
| <b>FN0023</b>                                                  |            |        |          |          |            |        |          |          |              |        |          |          | 0.322          | 7.241  |          |          | 0.355        | 7.459  |          |          | -0.033         | 7.781  |          |          |                         |     |       |       |    |    |    |   |   |   |   |  |
| AAL94236.1  Short-chain fatty acids transporter                |            |        |          |          |            |        |          |          |              |        |          |          |                |        |          |          |              |        |          |          |                |        |          |          |                         |     |       |       |    |    |    |   |   |   |   |  |
| <b>FN0024</b>                                                  | -2.410     | 10.338 | 2.211e-4 | 4.451e-5 | -2.296     | 10.636 |          |          | -1.508       | 11.036 | 3.217e-4 | 5.553e-4 | 0.902          | 8.830  | 3.244e-2 | 4.269e-2 | 0.113        | 8.227  |          |          | 0.788          | 9.128  |          |          |                         |     |       |       |    |    |    |   |   |   |   |  |
| AAL94237.1  Hypothetical exported 24-amino acid repeat protein |            |        |          |          |            |        |          |          |              |        |          |          |                |        |          |          |              |        |          |          |                |        |          |          |                         |     |       |       |    |    |    |   |   |   |   |  |
| <b>FN0025</b>                                                  | -2.614     | 8.229  |          |          | -2.514     | 8.514  |          |          | -2.155       | 8.484  |          |          | 0.459          | 6.074  |          |          | 0.100        | 5.900  |          |          | 0.359          | 6.359  |          |          |                         |     |       |       |    |    |    |   |   |   |   |  |
| AAL94238.1  Hypothetical exported 24-amino acid repeat protein |            |        |          |          |            |        |          |          |              |        |          |          |                |        |          |          |              |        |          |          |                |        |          |          |                         |     |       |       |    |    |    |   |   |   |   |  |
| <b>FN0026</b>                                                  |            |        |          |          |            |        |          |          | 0.872        | 9.200  | 1.2e-2   | 5.066e-2 |                |        |          |          |              |        |          |          |                |        |          |          |                         |     |       |       |    |    |    |   |   |   |   |  |
| AAL94239.1  Hypothetical exported 24-amino acid repeat protein |            |        |          |          |            |        |          |          |              |        |          |          |                |        |          |          |              |        |          |          |                |        |          |          |                         |     |       |       |    |    |    |   |   |   |   |  |
| <b>FN0029</b>                                                  |            |        |          |          |            |        |          |          | -0.920       | 5.564  |          |          |                |        |          |          |              |        |          |          |                |        |          |          |                         |     |       |       |    |    |    |   |   |   |   |  |
| AAL94242.1  Flavodoxin                                         |            |        |          |          |            |        |          |          |              |        |          |          |                |        |          |          |              |        |          |          |                |        |          |          |                         |     |       |       |    |    |    |   |   |   |   |  |

Show detected proteins only  
 Show all proteins  
 Filter by category:

Proteins found: 1424

Enter (or paste) list of ORFs

Find ORFs

Test Cutoff

q-Value .005

p-Value

Dot Plots

Dot Plots

| Signif | Direction | Applies To   |
|--------|-----------|--------------|
| yes    | +         | ratios, bars |
| no     | n/a       | bars         |
| yes    | -         | ratios, bars |
| yes    | +         | p-, q-Values |
| yes    | -         | p-, q-Values |

FnPg vs Fn —

FnPgSg vs Fn —

FnSg vs FnPg —

FnPgSg vs FnSg —

FnSg vs Fn —

FnPgSg vs FnPg —

FnPgSg vs FnSg —

Fn Summary Table

FnPg vs Fn

FnSg vs Fn

FnPgSg vs Fn

FnPgSg vs FnPg

FnSg vs FnPg

FnPgSg vs FnSg

Fn Coverage

| ORF           | FnPg vs Fn                                                                |        |          |          | FnSg vs Fn |        |          |          | FnPgSg vs Fn |        |          |           | FnPgSg vs FnPg |        |          |          | FnSg vs FnPg |        |          |          | FnPgSg vs FnSg |        |          |          | Log <sub>2</sub> Ratios |     |       |       |    |    |    |   |   |   |   |  |  |  |  |  |  |  |  |  |
|---------------|---------------------------------------------------------------------------|--------|----------|----------|------------|--------|----------|----------|--------------|--------|----------|-----------|----------------|--------|----------|----------|--------------|--------|----------|----------|----------------|--------|----------|----------|-------------------------|-----|-------|-------|----|----|----|---|---|---|---|--|--|--|--|--|--|--|--|--|
|               | Ratio                                                                     | Sum    | q-Val    | p-Val    | Ratio      | Sum    | q-Val    | p-Val    | Ratio        | Sum    | q-Val    | p-Val     | Ratio          | Sum    | q-Val    | p-Val    | Ratio        | Sum    | q-Val    | p-Val    | Ratio          | Sum    | q-Val    | p-Val    | Ratio                   | Sum | q-Val | p-Val | -6 | -4 | -2 | 0 | 2 | 4 | 6 |  |  |  |  |  |  |  |  |  |
| <b>FN0030</b> | 0.941                                                                     | 12.742 | 2.833e-2 | 4.197e-2 | 0.770      | 12.755 | 3.016e-4 | 6.467e-4 | -0.029       | 11.568 | 1.437e-1 | 8.494e-1  | -0.969         | 12.713 | 2.885e-2 | 3.595e-2 | -0.171       | 13.696 | 2.765e-1 | 4.991e-1 | -0.799         | 12.726 | 5.533e-4 | 8.615e-4 |                         |     |       |       |    |    |    |   |   |   |   |  |  |  |  |  |  |  |  |  |
|               | AAL94243.1   5-nitroimidazole antibiotic resistance protein               |        |          |          |            |        |          |          |              |        |          |           |                |        |          |          |              |        |          |          |                |        |          |          |                         |     |       |       |    |    |    |   |   |   |   |  |  |  |  |  |  |  |  |  |
| <b>FN0031</b> | 1.926                                                                     | 7.752  | 6.48e-3  | 6.475e-3 | 1.640      | 7.650  | 3.089e-6 | 9.391e-7 | 0.497        | 6.119  | 3.703e-2 | 1.839e-1  | -1.429         | 8.250  | 8.203e-3 | 5.576e-3 | -0.287       | 9.576  | 1.584e-1 | 2.104e-1 | -1.142         | 8.147  | 1.66e-3  | 3.674e-3 |                         |     |       |       |    |    |    |   |   |   |   |  |  |  |  |  |  |  |  |  |
|               | AAL94244.1   unknown                                                      |        |          |          |            |        |          |          |              |        |          |           |                |        |          |          |              |        |          |          |                |        |          |          |                         |     |       |       |    |    |    |   |   |   |   |  |  |  |  |  |  |  |  |  |
| <b>FN0033</b> | -0.537                                                                    | 12.649 | 5.583e-2 | 1.044e-1 | -0.389     | 12.980 | 1.059e-7 | 6.028e-9 | -1.022       | 11.959 | 2.845e-8 | 7.664e-10 | -0.485         | 11.626 | 1.056e-1 | 2.401e-1 | 0.147        | 12.444 | 3.222e-1 | 6.206e-1 | -0.633         | 11.958 | 1.07e-6  | 1.34e-7  |                         |     |       |       |    |    |    |   |   |   |   |  |  |  |  |  |  |  |  |  |
|               | AAL94246.1   unknown                                                      |        |          |          |            |        |          |          |              |        |          |           |                |        |          |          |              |        |          |          |                |        |          |          |                         |     |       |       |    |    |    |   |   |   |   |  |  |  |  |  |  |  |  |  |
| <b>FN0034</b> | 0.033                                                                     | 9.683  | 2.871e-1 | 8.979e-1 | -0.699     | 9.136  | 2.259e-5 | 1.945e-5 | 0.619        | 10.066 | 1.553e-3 | 4.415e-3  | 0.587          | 10.302 | 3.262e-2 | 4.304e-2 | -0.732       | 9.168  | 1.017e-1 | 8.763e-2 | 1.319          | 9.755  | 6.41e-4  | 1.067e-3 |                         |     |       |       |    |    |    |   |   |   |   |  |  |  |  |  |  |  |  |  |
|               | AAL94247.1   unknown                                                      |        |          |          |            |        |          |          |              |        |          |           |                |        |          |          |              |        |          |          |                |        |          |          |                         |     |       |       |    |    |    |   |   |   |   |  |  |  |  |  |  |  |  |  |
| <b>FN0038</b> |                                                                           |        |          |          |            |        |          |          |              |        |          |           |                |        |          |          |              |        |          |          |                |        |          |          |                         |     |       |       |    |    |    |   |   |   |   |  |  |  |  |  |  |  |  |  |
|               | AAL94251.1   unknown                                                      |        |          |          |            |        |          |          |              |        |          |           |                |        |          |          |              |        |          |          |                |        |          |          |                         |     |       |       |    |    |    |   |   |   |   |  |  |  |  |  |  |  |  |  |
| <b>FN0039</b> | 0.032                                                                     | 6.887  |          |          | 0.521      | 7.561  | 7.269e-4 | 2.007e-3 |              |        |          |           |                |        |          |          | 0.489        | 7.593  |          |          |                |        |          |          |                         |     |       |       |    |    |    |   |   |   |   |  |  |  |  |  |  |  |  |  |
|               | AAL94252.1   DNA primase (bacterial type) and small primase-like proteins |        |          |          |            |        |          |          |              |        |          |           |                |        |          |          |              |        |          |          |                |        |          |          |                         |     |       |       |    |    |    |   |   |   |   |  |  |  |  |  |  |  |  |  |
| <b>FN0040</b> | 0.040                                                                     | 18.005 | 2.345e-1 | 6.828e-1 | 0.442      | 18.592 | 1.777e-5 | 1.378e-5 | -0.097       | 17.664 | 1.467e-2 | 6.352e-2  | -0.137         | 17.908 | 1.011e-1 | 2.234e-1 | 0.402        | 18.632 | 2.871e-2 | 8.462e-3 | -0.539         | 18.495 | 1.488e-5 | 5.633e-6 |                         |     |       |       |    |    |    |   |   |   |   |  |  |  |  |  |  |  |  |  |
|               | AAL94253.1   Asparaginyl-tRNA synthetase                                  |        |          |          |            |        |          |          |              |        |          |           |                |        |          |          |              |        |          |          |                |        |          |          |                         |     |       |       |    |    |    |   |   |   |   |  |  |  |  |  |  |  |  |  |
| <b>FN0041</b> | -0.530                                                                    | 6.145  |          |          |            |        |          |          | -0.402       | 6.068  | 5.601e-2 | 2.941e-1  | 0.127          | 5.742  |          |          |              |        |          |          |                |        |          |          |                         |     |       |       |    |    |    |   |   |   |   |  |  |  |  |  |  |  |  |  |
|               | AAL94254.1   unknown                                                      |        |          |          |            |        |          |          |              |        |          |           |                |        |          |          |              |        |          |          |                |        |          |          |                         |     |       |       |    |    |    |   |   |   |   |  |  |  |  |  |  |  |  |  |
| <b>FN0043</b> | -0.908                                                                    | 6.908  |          |          |            |        |          |          | -1.806       | 5.806  |          |           | -0.898         | 5.102  |          |          |              |        |          |          |                |        |          |          |                         |     |       |       |    |    |    |   |   |   |   |  |  |  |  |  |  |  |  |  |
|               | AAL94256.1   Hypothetical exported 24-amino acid repeat protein           |        |          |          |            |        |          |          |              |        |          |           |                |        |          |          |              |        |          |          |                |        |          |          |                         |     |       |       |    |    |    |   |   |   |   |  |  |  |  |  |  |  |  |  |
| <b>FN0045</b> |                                                                           |        |          |          | -0.622     | 6.237  |          |          |              |        |          |           |                |        |          |          |              |        |          |          |                |        |          |          |                         |     |       |       |    |    |    |   |   |   |   |  |  |  |  |  |  |  |  |  |
|               | AAL94258.1   Shikimate 5-dehydrogenase                                    |        |          |          |            |        |          |          |              |        |          |           |                |        |          |          |              |        |          |          |                |        |          |          |                         |     |       |       |    |    |    |   |   |   |   |  |  |  |  |  |  |  |  |  |
| <b>FN0046</b> | 0.453                                                                     | 5.099  |          |          |            |        |          |          | 1.136        | 5.579  |          |           | 0.683          | 6.236  |          |          |              |        |          |          |                |        |          |          |                         |     |       |       |    |    |    |   |   |   |   |  |  |  |  |  |  |  |  |  |
|               | AAL94259.1   3-dehydroquininate dehydratase                               |        |          |          |            |        |          |          |              |        |          |           |                |        |          |          |              |        |          |          |                |        |          |          |                         |     |       |       |    |    |    |   |   |   |   |  |  |  |  |  |  |  |  |  |
| <b>FN0047</b> | -0.754                                                                    | 12.407 | 6.949e-3 | 7.143e-3 | -0.690     | 12.656 | 1.944e-4 | 3.696e-4 | -0.392       | 12.565 | 8.829e-4 | 2.036e-3  | 0.362          | 12.015 | 5.7e-2   | 9.732e-2 | 0.064        | 11.902 | 3.588e-1 | 7.305e-1 | 0.298          | 12.263 | 7.296e-5 | 5.701e-5 |                         |     |       |       |    |    |    |   |   |   |   |  |  |  |  |  |  |  |  |  |
|               | AAL94260.1   Exodeoxyribonuclease III                                     |        |          |          |            |        |          |          |              |        |          |           |                |        |          |          |              |        |          |          |                |        |          |          |                         |     |       |       |    |    |    |   |   |   |   |  |  |  |  |  |  |  |  |  |
| <b>FN0048</b> | -1.806                                                                    | 9.090  | 4.751e-4 | 1.424e-4 | -0.904     | 10.176 | 7.755e-4 | 2.196e-3 | -1.375       | 9.318  | 4.649e-4 | 9.091e-4  | 0.432          | 7.715  | 1.458e-2 | 1.347e-2 | 0.902        | 8.370  | 7.266e-3 | 1.077e-3 | -0.470         | 8.802  | 1.982e-5 | 9.147e-6 |                         |     |       |       |    |    |    |   |   |   |   |  |  |  |  |  |  |  |  |  |
|               | AAL94261.1   4-nitrophenylphosphatase                                     |        |          |          |            |        |          |          |              |        |          |           |                |        |          |          |              |        |          |          |                |        |          |          |                         |     |       |       |    |    |    |   |   |   |   |  |  |  |  |  |  |  |  |  |
| <b>FN0049</b> | 2.461                                                                     | 6.414  |          |          | 3.827      | 7.964  |          |          |              |        |          |           |                |        |          |          | 1.366        | 10.425 | 1.414e-2 | 2.841e-3 |                |        |          |          |                         |     |       |       |    |    |    |   |   |   |   |  |  |  |  |  |  |  |  |  |
|               | AAL94262.1   Hypothetical protein                                         |        |          |          |            |        |          |          |              |        |          |           |                |        |          |          |              |        |          |          |                |        |          |          |                         |     |       |       |    |    |    |   |   |   |   |  |  |  |  |  |  |  |  |  |
| <b>FN0050</b> | -2.087                                                                    | 19.021 | 5.604e-5 | 5.869e-6 | -2.906     | 18.386 | 8.882e-5 | 1.311e-4 | -0.308       | 20.596 | 2.719e-2 | 1.28e-1   | 1.779          | 18.713 | 7.945e-3 | 5.254e-3 | -0.820       | 16.299 | 8.04e-2  | 5.463e-2 | 2.598          | 18.078 | 2.221e-3 | 5.272e-3 |                         |     |       |       |    |    |    |   |   |   |   |  |  |  |  |  |  |  |  |  |
|               | AAL94263.1   Fumarate reductase flavoprotein subunit                      |        |          |          |            |        |          |          |              |        |          |           |                |        |          |          |              |        |          |          |                |        |          |          |                         |     |       |       |    |    |    |   |   |   |   |  |  |  |  |  |  |  |  |  |
| <b>FN0052</b> | -1.633                                                                    | 9.711  |          |          |            |        |          |          | -0.988       | 10.152 | 5.96e-5  | 5.203e-5  | 0.645          | 8.723  |          |          |              |        |          |          |                |        |          |          |                         |     |       |       |    |    |    |   |   |   |   |  |  |  |  |  |  |  |  |  |
|               | AAL94265.1   Arsenate reductase                                           |        |          |          |            |        |          |          |              |        |          |           |                |        |          |          |              |        |          |          |                |        |          |          |                         |     |       |       |    |    |    |   |   |   |   |  |  |  |  |  |  |  |  |  |
| <b>FN0054</b> | -0.656                                                                    | 14.433 | 4.46e-2  | 7.663e-2 | -0.304     | 14.970 | 6.079e-6 | 2.647e-6 | 0.180        | 15.065 | 7.739e-4 | 1.728e-3  | 0.836          | 14.613 | 2.865e-2 | 3.557e-2 | 0.352        | 14.314 | 1.918e-1 | 2.926e-1 | 0.484          | 15.149 | 1.567e-4 | 1.577e-4 |                         |     |       |       |    |    |    |   |   |   |   |  |  |  |  |  |  |  |  |  |
|               | AAL94267.1   Tyrosyl-tRNA synthetase                                      |        |          |          |            |        |          |          |              |        |          |           |                |        |          |          |              |        |          |          |                |        |          |          |                         |     |       |       |    |    |    |   |   |   |   |  |  |  |  |  |  |  |  |  |

Show detected proteins only  
 Show all proteins  
 Filter by category:

Proteins found: 1424

Enter (or paste) list of ORFs

Find ORFs

Test Cutoff

q-Value .005

p-Value

Dot Plots

| Signif | Direction | Applies To   |
|--------|-----------|--------------|
| yes    | +         | ratios, bars |
| no     | n/a       | bars         |
| yes    | -         | ratios, bars |
| yes    | +         | p-, q-Values |
| yes    | -         | p-, q-Values |

FnPg vs Fn — — FnSg vs Fn  
 FnPgSg vs Fn — — FnPgSg vs FnPg  
 FnSg vs FnPg — — FnPgSg vs FnSg

Fn Summary Table FnPg vs Fn FnSg vs Fn FnPgSg vs Fn FnPgSg vs FnPg FnSg vs FnPg FnPgSg vs FnSg Fn Coverage

| ORF                                                                               | FnPg vs Fn |        |          |          | FnSg vs Fn |        |          |          | FnPgSg vs Fn |        |          |          | FnPgSg vs FnPg |        |          |          | FnSg vs FnPg |        |          |          | FnPgSg vs FnSg |        |          |          | Log <sub>2</sub> Ratios |     |       |       |    |    |    |   |   |   |   |  |
|-----------------------------------------------------------------------------------|------------|--------|----------|----------|------------|--------|----------|----------|--------------|--------|----------|----------|----------------|--------|----------|----------|--------------|--------|----------|----------|----------------|--------|----------|----------|-------------------------|-----|-------|-------|----|----|----|---|---|---|---|--|
|                                                                                   | Ratio      | Sum    | q-Val    | p-Val    | Ratio      | Sum    | q-Val    | p-Val    | Ratio        | Sum    | q-Val    | p-Val    | Ratio          | Sum    | q-Val    | p-Val    | Ratio        | Sum    | q-Val    | p-Val    | Ratio          | Sum    | q-Val    | p-Val    | Ratio                   | Sum | q-Val | p-Val | -6 | -4 | -2 | 0 | 2 | 4 | 6 |  |
| <b>FN0058</b>                                                                     | -0.140     | 15.152 | 1.373e-1 | 3.386e-1 | 0.314      | 15.791 | 8.433e-2 | 4.894e-1 | -0.885       | 14.203 | 1.496e-3 | 5.701e-6 | -0.746         | 14.267 | 1.756e-2 | 1.775e-2 | 0.454        | 15.651 | 2.212e-1 | 3.627e-1 | -1.200         | 14.906 | 2.644e-2 | 1.08e-1  |                         |     |       |       |    |    |    |   |   |   |   |  |
| AAL94271.1   Cysteine desulfhydrase                                               |            |        |          |          |            |        |          |          |              |        |          |          |                |        |          |          |              |        |          |          |                |        |          |          |                         |     |       |       |    |    |    |   |   |   |   |  |
| <b>FN0059</b>                                                                     | -1.187     | 10.292 | 1.566e-3 | 9.088e-4 | -0.273     | 11.390 | 6.53e-2  | 3.713e-1 | -0.329       | 10.946 | 5.812e-3 | 2.184e-2 | 0.859          | 9.963  | 9.856e-4 | 2.352e-4 | 0.914        | 10.203 | 1.057e-1 | 9.419e-2 | -0.055         | 11.061 | 1.66e-1  | 8.61e-1  |                         |     |       |       |    |    |    |   |   |   |   |  |
| AAL94272.1   NifU protein                                                         |            |        |          |          |            |        |          |          |              |        |          |          |                |        |          |          |              |        |          |          |                |        |          |          |                         |     |       |       |    |    |    |   |   |   |   |  |
| <b>FN0060</b>                                                                     | -1.856     | 8.478  | 1.087e-3 | 5.368e-4 | -2.452     | 8.067  |          |          | -0.809       | 9.321  | 1.62e-5  | 6.499e-6 | 1.047          | 7.669  | 1.152e-2 | 9.384e-3 | -0.596       | 6.211  |          |          | 1.643          | 7.258  |          |          |                         |     |       |       |    |    |    |   |   |   |   |  |
| AAL94273.1   D-alanyl-D-alanine carboxypeptidase                                  |            |        |          |          |            |        |          |          |              |        |          |          |                |        |          |          |              |        |          |          |                |        |          |          |                         |     |       |       |    |    |    |   |   |   |   |  |
| <b>FN0061</b>                                                                     | 0.092      | 12.784 | 2.844e-1 | 8.859e-1 | 0.005      | 12.882 | 1.523e-1 | 9.547e-1 | 0.017        | 12.506 | 1.065e-1 | 6.032e-1 | -0.075         | 12.801 | 2.744e-1 | 9.066e-1 | -0.086       | 12.974 | 4.062e-1 | 8.929e-1 | 0.012          | 12.899 | 1.725e-1 | 9.02e-1  |                         |     |       |       |    |    |    |   |   |   |   |  |
| AAL94274.1   Thermostable carboxypeptidase 1                                      |            |        |          |          |            |        |          |          |              |        |          |          |                |        |          |          |              |        |          |          |                |        |          |          |                         |     |       |       |    |    |    |   |   |   |   |  |
| <b>FN0062</b>                                                                     | -0.934     | 6.104  |          |          |            |        |          |          | 0.342        | 7.177  | 3.453e-2 | 1.697e-1 | 1.277          | 6.447  |          |          |              |        |          |          |                |        |          |          |                         |     |       |       |    |    |    |   |   |   |   |  |
| AAL94275.1   Hypothetical cytosolic protein                                       |            |        |          |          |            |        |          |          |              |        |          |          |                |        |          |          |              |        |          |          |                |        |          |          |                         |     |       |       |    |    |    |   |   |   |   |  |
| <b>FN0063</b>                                                                     |            |        |          |          |            |        |          |          |              |        |          |          |                |        |          |          |              |        |          |          |                |        |          |          |                         |     |       |       |    |    |    |   |   |   |   |  |
| AAL94276.1   unknown                                                              |            |        |          |          |            |        |          |          |              |        |          |          |                |        |          |          |              |        |          |          |                |        |          |          |                         |     |       |       |    |    |    |   |   |   |   |  |
| <b>FN0065</b>                                                                     | -1.267     | 13.695 | 4.057e-4 | 1.097e-4 | -0.894     | 14.252 | 2.279e-4 | 4.492e-4 | -0.753       | 14.005 | 4.603e-4 | 8.975e-4 | 0.513          | 12.942 | 1.35e-3  | 3.901e-4 | 0.372        | 12.985 | 1.016e-1 | 8.749e-2 | 0.141          | 13.499 | 7.609e-2 | 3.562e-1 |                         |     |       |       |    |    |    |   |   |   |   |  |
| AAL94278.1   Transcription accessory protein (S1 RNA binding domain)              |            |        |          |          |            |        |          |          |              |        |          |          |                |        |          |          |              |        |          |          |                |        |          |          |                         |     |       |       |    |    |    |   |   |   |   |  |
| <b>FN0066</b>                                                                     |            |        |          |          |            |        |          |          |              |        |          |          |                |        |          |          |              |        |          |          |                |        |          |          |                         |     |       |       |    |    |    |   |   |   |   |  |
| AAL94279.1   Two component system histidine kinase                                |            |        |          |          |            |        |          |          |              |        |          |          |                |        |          |          |              |        |          |          |                |        |          |          |                         |     |       |       |    |    |    |   |   |   |   |  |
| <b>FN0067</b>                                                                     | -0.988     | 17.171 | 2.064e-3 | 1.353e-3 | -1.276     | 17.068 | 1.701e-5 | 1.293e-5 | -0.530       | 17.426 | 2.072e-5 | 9.503e-6 | 0.458          | 16.642 | 2.677e-2 | 3.218e-2 | -0.288       | 16.080 | 1.432e-1 | 1.712e-1 | 0.746          | 16.538 | 2.253e-5 | 1.099e-5 |                         |     |       |       |    |    |    |   |   |   |   |  |
| AAL94280.1   Isoleucyl-tRNA synthetase                                            |            |        |          |          |            |        |          |          |              |        |          |          |                |        |          |          |              |        |          |          |                |        |          |          |                         |     |       |       |    |    |    |   |   |   |   |  |
| <b>FN0069</b>                                                                     | 0.373      | 15.301 | 6.215e-2 | 1.221e-1 | -0.019     | 15.094 | 1.435e-1 | 8.903e-1 | -0.085       | 14.640 | 7.328e-2 | 3.959e-1 | -0.457         | 15.217 | 5.162e-2 | 8.355e-2 | -0.392       | 15.467 | 1.169e-1 | 1.137e-1 | -0.066         | 15.009 | 1.227e-1 | 6.048e-1 |                         |     |       |       |    |    |    |   |   |   |   |  |
| AAL94282.1   Glycyl-tRNA synthetase alpha chain                                   |            |        |          |          |            |        |          |          |              |        |          |          |                |        |          |          |              |        |          |          |                |        |          |          |                         |     |       |       |    |    |    |   |   |   |   |  |
| <b>FN0070</b>                                                                     | -0.301     | 17.538 | 4.828e-2 | 8.539e-2 | 0.067      | 18.090 | 2.792e-2 | 1.478e-1 | -0.461       | 17.173 | 1.237e-4 | 1.47e-4  | -0.161         | 17.077 | 1.322e-1 | 3.363e-1 | 0.368        | 17.790 | 7.383e-2 | 4.585e-2 | -0.528         | 17.629 | 5.561e-4 | 8.676e-4 |                         |     |       |       |    |    |    |   |   |   |   |  |
| AAL94283.1   Glycyl-tRNA synthetase beta chain                                    |            |        |          |          |            |        |          |          |              |        |          |          |                |        |          |          |              |        |          |          |                |        |          |          |                         |     |       |       |    |    |    |   |   |   |   |  |
| <b>FN0071</b>                                                                     | -0.392     | 6.392  |          |          | -0.296     | 6.671  |          |          |              |        |          |          |                |        |          |          | 0.095        | 6.280  |          |          |                |        |          |          |                         |     |       |       |    |    |    |   |   |   |   |  |
| AAL94284.1   GTP cyclohydrolase I                                                 |            |        |          |          |            |        |          |          |              |        |          |          |                |        |          |          |              |        |          |          |                |        |          |          |                         |     |       |       |    |    |    |   |   |   |   |  |
| <b>FN0072</b>                                                                     | 0.159      | 12.943 | 2.316e-1 | 6.721e-1 | 0.620      | 13.588 | 2.807e-4 | 5.872e-4 | -0.484       | 12.097 | 7.448e-5 | 7.088e-5 | -0.643         | 12.460 | 9.599e-2 | 2.054e-1 | 0.461        | 13.747 | 1.498e-1 | 1.899e-1 | -1.103         | 13.105 | 8.499e-5 | 6.994e-5 |                         |     |       |       |    |    |    |   |   |   |   |  |
| AAL94285.1   2-amino-4-hydroxy-6-hydroxymethylidihydropteridine pyrophosphokinase |            |        |          |          |            |        |          |          |              |        |          |          |                |        |          |          |              |        |          |          |                |        |          |          |                         |     |       |       |    |    |    |   |   |   |   |  |
| <b>FN0073</b>                                                                     | -0.702     | 10.009 | 6.226e-2 | 1.224e-1 | -0.528     | 10.367 | 2.285e-2 | 1.186e-1 | -1.025       | 9.482  | 1.825e-5 | 7.944e-6 | -0.323         | 8.984  | 1.884e-1 | 5.471e-1 | 0.174        | 9.665  | 3.632e-1 | 7.446e-1 | -0.496         | 9.342  | 5.559e-2 | 2.512e-1 |                         |     |       |       |    |    |    |   |   |   |   |  |
| AAL94286.1   Dihydropteroate synthase                                             |            |        |          |          |            |        |          |          |              |        |          |          |                |        |          |          |              |        |          |          |                |        |          |          |                         |     |       |       |    |    |    |   |   |   |   |  |
| <b>FN0074</b>                                                                     | -0.272     | 8.272  |          |          | -0.234     | 8.494  | 9.103e-2 | 5.322e-1 | -0.710       | 7.629  |          |          | -0.439         | 7.561  |          |          | 0.038        | 8.222  |          |          | -0.476         | 7.784  |          |          |                         |     |       |       |    |    |    |   |   |   |   |  |
| AAL94287.1   Ethanolamine utilization protein eutS                                |            |        |          |          |            |        |          |          |              |        |          |          |                |        |          |          |              |        |          |          |                |        |          |          |                         |     |       |       |    |    |    |   |   |   |   |  |
| <b>FN0076</b>                                                                     |            |        |          |          |            |        |          |          |              |        |          |          |                |        |          |          |              |        |          |          |                |        |          |          |                         |     |       |       |    |    |    |   |   |   |   |  |
| AAL94289.1   Ethanolamine two-component response regulator                        |            |        |          |          |            |        |          |          |              |        |          |          |                |        |          |          |              |        |          |          |                |        |          |          |                         |     |       |       |    |    |    |   |   |   |   |  |
| <b>FN0077</b>                                                                     | -1.392     | 4.561  |          |          | 0.632      | 6.769  |          |          |              |        |          |          |                |        |          |          | 2.023        | 5.378  |          |          |                |        |          |          |                         |     |       |       |    |    |    |   |   |   |   |  |
| AAL94290.1   Ethanolamine two-component sensor kinase                             |            |        |          |          |            |        |          |          |              |        |          |          |                |        |          |          |              |        |          |          |                |        |          |          |                         |     |       |       |    |    |    |   |   |   |   |  |

Show detected proteins only  
 Show all proteins  
 Filter by category:

Proteins found: 1424

Enter (or paste) list of ORFs

Test Cutoff

| Signif | Direction | Applies To   |
|--------|-----------|--------------|
| yes    | +         | ratios, bars |
| no     | n/a       | bars         |
| yes    | -         | ratios, bars |
| yes    | +         | p-, q-Values |
| yes    | -         | p-, q-Values |

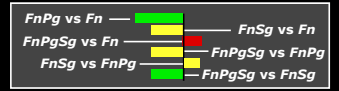

Fn Summary Table   FnPg vs Fn   FnSg vs Fn   FnPgSg vs Fn   FnPgSg vs FnPg   FnSg vs FnPg   FnPgSg vs FnSg   Fn Coverage

| ORF           | FnPg vs Fn                                                    |        |          |          | FnSg vs Fn |        |          |          | FnPgSg vs Fn |        |          |          | FnPgSg vs FnPg |        |          |          | FnSg vs FnPg |        |          |          | FnPgSg vs FnSg |        |          |          | Log <sub>2</sub> Ratios |     |       |       |    |    |    |   |   |   |   |  |
|---------------|---------------------------------------------------------------|--------|----------|----------|------------|--------|----------|----------|--------------|--------|----------|----------|----------------|--------|----------|----------|--------------|--------|----------|----------|----------------|--------|----------|----------|-------------------------|-----|-------|-------|----|----|----|---|---|---|---|--|
|               | Ratio                                                         | Sum    | q-Val    | p-Val    | Ratio      | Sum    | q-Val    | p-Val    | Ratio        | Sum    | q-Val    | p-Val    | Ratio          | Sum    | q-Val    | p-Val    | Ratio        | Sum    | q-Val    | p-Val    | Ratio          | Sum    | q-Val    | p-Val    | Ratio                   | Sum | q-Val | p-Val | -6 | -4 | -2 | 0 | 2 | 4 | 6 |  |
| <b>FN0078</b> | 1.882                                                         | 7.835  |          |          | 1.437      | 7.574  |          |          | -0.209       | 5.540  |          |          | -2.092         | 7.626  | 8.903e-4 | 2.004e-4 | -0.445       | 9.457  | 4.438e-2 | 1.819e-2 | -1.646         | 7.365  | 7.87e-5  | 6.302e-5 |                         |     |       |       |    |    |    |   |   |   |   |  |
|               | AAL94291.1   Ethanolamine utilization protein eutA            |        |          |          |            |        |          |          |              |        |          |          |                |        |          |          |              |        |          |          |                |        |          |          |                         |     |       |       |    |    |    |   |   |   |   |  |
| <b>FN0079</b> | 0.842                                                         | 14.037 | 1.25e-1  | 3.005e-1 | 1.007      | 14.387 | 4.635e-5 | 5.506e-5 | -1.622       | 11.369 | 8.866e-5 | 9.085e-5 | -2.464         | 12.415 | 5.957e-2 | 1.037e-1 | 0.165        | 15.228 | 3.665e-1 | 7.552e-1 | -2.629         | 12.764 | 5.808e-5 | 4.252e-5 |                         |     |       |       |    |    |    |   |   |   |   |  |
|               | AAL94292.1   Ethanolamine ammonia-lyase heavy chain           |        |          |          |            |        |          |          |              |        |          |          |                |        |          |          |              |        |          |          |                |        |          |          |                         |     |       |       |    |    |    |   |   |   |   |  |
| <b>FN0080</b> | 0.902                                                         | 14.623 | 4.69e-4  | 1.392e-4 | 0.180      | 14.085 | 3.374e-2 | 1.823e-1 | -0.932       | 12.585 | 9.368e-4 | 2.197e-3 | -1.834         | 13.691 | 3.228e-6 | 6.998e-8 | -0.723       | 14.987 | 3.075e-3 | 2.684e-4 | -1.112         | 13.153 | 5.42e-4  | 8.365e-4 |                         |     |       |       |    |    |    |   |   |   |   |  |
|               | AAL94293.1   Ethanolamine ammonia-lyase light chain           |        |          |          |            |        |          |          |              |        |          |          |                |        |          |          |              |        |          |          |                |        |          |          |                         |     |       |       |    |    |    |   |   |   |   |  |
| <b>FN0081</b> | 1.042                                                         | 14.363 | 7.517e-2 | 1.565e-1 | 1.350      | 14.856 | 2.767e-3 | 1.014e-2 | -1.614       | 11.503 | 3.069e-5 | 1.767e-5 | -2.656         | 12.749 | 3.831e-2 | 5.419e-2 | 0.308        | 15.898 | 2.664e-1 | 4.741e-1 | -2.964         | 13.242 | 1.679e-3 | 3.728e-3 |                         |     |       |       |    |    |    |   |   |   |   |  |
|               | AAL94294.1   Ethanolamine utilization protein eutL            |        |          |          |            |        |          |          |              |        |          |          |                |        |          |          |              |        |          |          |                |        |          |          |                         |     |       |       |    |    |    |   |   |   |   |  |
| <b>FN0082</b> | 1.056                                                         | 8.758  |          |          | 1.343      | 9.229  |          |          | 0.534        | 8.032  |          |          | -0.522         | 9.292  |          |          | 0.287        | 10.285 |          |          | -0.809         | 9.763  | 2.699e-2 | 1.106e-1 |                         |     |       |       |    |    |    |   |   |   |   |  |
|               | AAL94295.1   Ethanolamine utilization protein eutM            |        |          |          |            |        |          |          |              |        |          |          |                |        |          |          |              |        |          |          |                |        |          |          |                         |     |       |       |    |    |    |   |   |   |   |  |
| <b>FN0083</b> | 1.151                                                         | 15.460 | 6.376e-2 | 1.263e-1 | 0.714      | 15.208 | 2.881e-3 | 1.066e-2 | -0.929       | 13.177 | 1.214e-3 | 3.115e-3 | -2.079         | 14.531 | 4.203e-2 | 6.167e-2 | -0.436       | 16.359 | 2.349e-1 | 3.977e-1 | -1.643         | 14.280 | 1.247e-3 | 2.574e-3 |                         |     |       |       |    |    |    |   |   |   |   |  |
|               | AAL94296.1   Ethanolamine utilization protein eutM precursor  |        |          |          |            |        |          |          |              |        |          |          |                |        |          |          |              |        |          |          |                |        |          |          |                         |     |       |       |    |    |    |   |   |   |   |  |
| <b>FN0084</b> | 0.119                                                         | 10.872 | 4.019e-2 | 6.639e-2 | -0.211     | 10.727 | 3.136e-2 | 1.681e-1 | -0.929       | 9.620  | 4.369e-4 | 8.395e-4 | -1.048         | 9.943  | 4.175e-3 | 1.977e-3 | -0.329       | 10.846 | 8.358e-2 | 5.918e-2 | -0.719         | 9.798  | 4.306e-3 | 1.232e-2 |                         |     |       |       |    |    |    |   |   |   |   |  |
|               | AAL94297.1   Acetaldehyde dehydrogenase (acetylating)         |        |          |          |            |        |          |          |              |        |          |          |                |        |          |          |              |        |          |          |                |        |          |          |                         |     |       |       |    |    |    |   |   |   |   |  |
| <b>FN0086</b> |                                                               |        |          |          |            |        |          |          |              |        |          |          |                |        |          |          |              |        |          |          |                |        |          |          |                         |     |       |       |    |    |    |   |   |   |   |  |
|               | AAL94299.1   Hypothetical protein                             |        |          |          |            |        |          |          |              |        |          |          |                |        |          |          |              |        |          |          |                |        |          |          |                         |     |       |       |    |    |    |   |   |   |   |  |
| <b>FN0087</b> |                                                               |        |          |          |            |        |          |          |              |        |          |          |                |        |          |          | -1.925       | 6.569  |          |          |                |        |          |          |                         |     |       |       |    |    |    |   |   |   |   |  |
|               | AAL94300.1   Ethanolamine utilization protein eutN            |        |          |          |            |        |          |          |              |        |          |          |                |        |          |          |              |        |          |          |                |        |          |          |                         |     |       |       |    |    |    |   |   |   |   |  |
| <b>FN0088</b> |                                                               |        |          |          | 0.686      | 5.654  |          |          |              |        |          |          |                |        |          |          |              |        |          |          |                |        |          |          |                         |     |       |       |    |    |    |   |   |   |   |  |
|               | AAL94301.1   Hypothetical protein                             |        |          |          |            |        |          |          |              |        |          |          |                |        |          |          |              |        |          |          |                |        |          |          |                         |     |       |       |    |    |    |   |   |   |   |  |
| <b>FN0089</b> |                                                               |        |          |          |            |        |          |          |              |        |          |          |                |        |          |          |              |        |          |          |                |        |          |          |                         |     |       |       |    |    |    |   |   |   |   |  |
|               | AAL94302.1   Ethanolamine permease                            |        |          |          |            |        |          |          |              |        |          |          |                |        |          |          |              |        |          |          |                |        |          |          |                         |     |       |       |    |    |    |   |   |   |   |  |
| <b>FN0090</b> |                                                               |        |          |          |            |        |          |          |              |        |          |          |                |        |          |          | -0.576       | 6.001  | 1.706e-1 | 2.397e-1 |                |        |          |          |                         |     |       |       |    |    |    |   |   |   |   |  |
|               | AAL94303.1   Ethanolamine utilization protein eutQ            |        |          |          |            |        |          |          |              |        |          |          |                |        |          |          |              |        |          |          |                |        |          |          |                         |     |       |       |    |    |    |   |   |   |   |  |
| <b>FN0091</b> |                                                               |        |          |          |            |        |          |          |              |        |          |          |                |        |          |          |              |        |          |          |                |        |          |          |                         |     |       |       |    |    |    |   |   |   |   |  |
|               | AAL94304.1   Phosphoserine phosphatase                        |        |          |          |            |        |          |          |              |        |          |          |                |        |          |          |              |        |          |          |                |        |          |          |                         |     |       |       |    |    |    |   |   |   |   |  |
| <b>FN0092</b> | 0.492                                                         | 10.680 | 1.89e-1  | 5.192e-1 | 0.830      | 11.203 | 1.614e-5 | 1.197e-5 | -1.780       | 8.204  | 3.482e-5 | 2.242e-5 | -2.272         | 8.900  | 7.374e-2 | 1.389e-1 | 0.338        | 11.695 | 2.975e-1 | 5.529e-1 | -2.611         | 9.423  | 1.505e-6 | 2e-7     |                         |     |       |       |    |    |    |   |   |   |   |  |
|               | AAL94305.1   NADPH-dependent butanol dehydrogenase            |        |          |          |            |        |          |          |              |        |          |          |                |        |          |          |              |        |          |          |                |        |          |          |                         |     |       |       |    |    |    |   |   |   |   |  |
| <b>FN0093</b> | -0.842                                                        | 16.090 | 4.414e-3 | 3.817e-3 | -1.914     | 15.202 | 4.362e-4 | 1.028e-3 | -0.043       | 16.685 | 1.195e-1 | 6.867e-1 | 0.798          | 16.047 | 1.861e-4 | 2.318e-5 | -1.072       | 14.361 | 1.411e-3 | 6.286e-5 | 1.871          | 15.159 | 1.909e-5 | 8.535e-6 |                         |     |       |       |    |    |    |   |   |   |   |  |
|               | AAL94306.1   Thioredoxin                                      |        |          |          |            |        |          |          |              |        |          |          |                |        |          |          |              |        |          |          |                |        |          |          |                         |     |       |       |    |    |    |   |   |   |   |  |
| <b>FN0100</b> | -1.317                                                        | 9.040  | 1.103e-2 | 1.274e-2 | -1.531     | 9.011  | 2.386e-3 | 8.457e-3 | -0.431       | 9.723  | 2.228e-2 | 1.019e-1 | 0.886          | 8.609  | 3.179e-3 | 1.339e-3 | -0.214       | 7.693  | 1.124e-1 | 1.056e-1 | 1.100          | 8.579  | 1.371e-4 | 1.308e-4 |                         |     |       |       |    |    |    |   |   |   |   |  |
|               | AAL94309.1   Flavodoxins/hemoproteins                         |        |          |          |            |        |          |          |              |        |          |          |                |        |          |          |              |        |          |          |                |        |          |          |                         |     |       |       |    |    |    |   |   |   |   |  |
| <b>FN0102</b> |                                                               |        |          |          |            |        |          |          | -0.826       | 6.687  | 7.66e-3  | 3.016e-2 |                |        |          |          |              |        |          |          |                |        |          |          |                         |     |       |       |    |    |    |   |   |   |   |  |
|               | AAL94311.1   Ribonucleoside-diphosphate reductase alpha chain |        |          |          |            |        |          |          |              |        |          |          |                |        |          |          |              |        |          |          |                |        |          |          |                         |     |       |       |    |    |    |   |   |   |   |  |

Show detected proteins only  
 Show all proteins  
 Filter by category:

Proteins found: 1424

Test Cutoff

| Signif | Direction | Applies To   |
|--------|-----------|--------------|
| yes    | +         | ratios, bars |
| no     | n/a       | bars         |
| yes    | -         | ratios, bars |
| yes    | +         | p-, q-Values |
| yes    | -         | p-, q-Values |

FnPg vs Fn — █ — FnSg vs Fn

FnPgSg vs Fn — █ — FnPgSg vs FnPg

FnSg vs FnPg — █ — FnPgSg vs FnSg

Fn Summary Table    FnPg vs Fn    FnSg vs Fn    FnPgSg vs Fn    FnPgSg vs FnPg    FnSg vs FnPg    FnPgSg vs FnSg    Fn Coverage

| ORF           | FnPg vs Fn                                                   |        |          |          | FnSg vs Fn |        |          |          | FnPgSg vs Fn |        |          |          | FnPgSg vs FnPg |        |          |          | FnSg vs FnPg |        |          |          | FnPgSg vs FnSg |        |          |          | Log <sub>2</sub> Ratios |     |       |       |    |    |    |   |   |   |   |  |
|---------------|--------------------------------------------------------------|--------|----------|----------|------------|--------|----------|----------|--------------|--------|----------|----------|----------------|--------|----------|----------|--------------|--------|----------|----------|----------------|--------|----------|----------|-------------------------|-----|-------|-------|----|----|----|---|---|---|---|--|
|               | Ratio                                                        | Sum    | q-Val    | p-Val    | Ratio      | Sum    | q-Val    | p-Val    | Ratio        | Sum    | q-Val    | p-Val    | Ratio          | Sum    | q-Val    | p-Val    | Ratio        | Sum    | q-Val    | p-Val    | Ratio          | Sum    | q-Val    | p-Val    | Ratio                   | Sum | q-Val | p-Val | -6 | -4 | -2 | 0 | 2 | 4 | 6 |  |
| <b>FN0103</b> |                                                              |        |          |          |            |        |          |          | -1.146       | 5.146  |          |          |                |        |          |          |              |        |          |          |                |        |          |          |                         |     |       |       |    |    |    |   |   |   |   |  |
|               | AAL94312.1   Ribonucleoside-diphosphate reductase beta chain |        |          |          |            |        |          |          |              |        |          |          |                |        |          |          |              |        |          |          |                |        |          |          |                         |     |       |       |    |    |    |   |   |   |   |  |
| <b>FN0106</b> | 0.481                                                        | 13.751 | 4.514e-3 | 3.942e-3 | 0.078      | 13.533 | 4.921e-2 | 2.742e-1 | 0.122        | 13.189 | 3.395e-2 | 1.665e-1 | -0.359         | 13.873 | 1.242e-2 | 1.048e-2 | -0.403       | 14.014 | 2.89e-2  | 8.559e-3 | 0.044          | 13.655 | 1.123e-1 | 5.472e-1 |                         |     |       |       |    |    |    |   |   |   |   |  |
|               | AAL94315.1   Hypothetical protein                            |        |          |          |            |        |          |          |              |        |          |          |                |        |          |          |              |        |          |          |                |        |          |          |                         |     |       |       |    |    |    |   |   |   |   |  |
| <b>FN0108</b> | 1.611                                                        | 7.947  | 4.839e-3 | 4.367e-3 | 1.487      | 8.008  | 9.4e-4   | 2.763e-3 | 0.104        | 6.236  |          |          | -1.507         | 8.051  |          |          | -0.124       | 9.619  | 2.944e-1 | 5.448e-1 | -1.384         | 8.112  |          |          |                         |     |       |       |    |    |    |   |   |   |   |  |
|               | AAL94317.1   Microcin C7 self-immunity protein mccF          |        |          |          |            |        |          |          |              |        |          |          |                |        |          |          |              |        |          |          |                |        |          |          |                         |     |       |       |    |    |    |   |   |   |   |  |
| <b>FN0110</b> | 0.226                                                        | 17.666 | 1.41e-1  | 3.503e-1 | -0.130     | 17.494 | 4.738e-3 | 1.946e-2 | -0.076       | 17.160 | 6.415e-2 | 3.414e-1 | -0.302         | 17.590 | 1.079e-1 | 2.49e-1  | -0.357       | 17.720 | 1.514e-1 | 1.94e-1  | 0.054          | 17.418 | 1.069e-1 | 5.177e-1 |                         |     |       |       |    |    |    |   |   |   |   |  |
|               | AAL94319.1   Seryl-tRNA synthetase                           |        |          |          |            |        |          |          |              |        |          |          |                |        |          |          |              |        |          |          |                |        |          |          |                         |     |       |       |    |    |    |   |   |   |   |  |
| <b>FN0111</b> |                                                              |        |          |          |            |        |          |          |              |        |          |          |                |        |          |          |              |        |          |          |                |        |          |          |                         |     |       |       |    |    |    |   |   |   |   |  |
|               | AAL94320.1   unknown                                         |        |          |          |            |        |          |          |              |        |          |          |                |        |          |          |              |        |          |          |                |        |          |          |                         |     |       |       |    |    |    |   |   |   |   |  |
| <b>FN0113</b> | 0.647                                                        | 11.693 | 1.201e-2 | 1.411e-2 | 1.648      | 12.879 | 2.225e-5 | 1.905e-5 | -1.470       | 9.373  | 3.872e-5 | 2.807e-5 | -2.117         | 10.223 | 2.542e-3 | 9.639e-4 | 1.001        | 13.526 | 1.855e-3 | 1.012e-4 | -3.118         | 11.409 | 3.382e-6 | 5.898e-7 |                         |     |       |       |    |    |    |   |   |   |   |  |
|               | AAL94322.1   Heat-inducible transcription repressor hrca     |        |          |          |            |        |          |          |              |        |          |          |                |        |          |          |              |        |          |          |                |        |          |          |                         |     |       |       |    |    |    |   |   |   |   |  |
| <b>FN0114</b> | -0.198                                                       | 13.784 | 6.152e-3 | 6.025e-3 | -0.075     | 14.091 | 1.259e-1 | 7.656e-1 | 0.309        | 14.087 | 1.204e-2 | 5.086e-2 | 0.507          | 14.093 | 1.711e-2 | 1.713e-2 | 0.123        | 13.893 | 3.326e-1 | 6.506e-1 | 0.384          | 14.400 | 3.79e-2  | 1.627e-1 |                         |     |       |       |    |    |    |   |   |   |   |  |
|               | AAL94323.1   GrpE protein                                    |        |          |          |            |        |          |          |              |        |          |          |                |        |          |          |              |        |          |          |                |        |          |          |                         |     |       |       |    |    |    |   |   |   |   |  |
| <b>FN0116</b> | 0.278                                                        | 20.274 | 1.647e-1 | 4.297e-1 | 0.796      | 20.976 | 2.799e-2 | 1.482e-1 | 0.016        | 19.808 | 1.367e-1 | 8.016e-1 | -0.263         | 20.290 | 1.638e-1 | 4.51e-1  | 0.517        | 21.255 | 1.923e-1 | 2.94e-1  | -0.780         | 20.992 | 3.583e-2 | 1.525e-1 |                         |     |       |       |    |    |    |   |   |   |   |  |
|               | AAL94325.1   Chaperone protein dnaK                          |        |          |          |            |        |          |          |              |        |          |          |                |        |          |          |              |        |          |          |                |        |          |          |                         |     |       |       |    |    |    |   |   |   |   |  |
| <b>FN0117</b> | 1.094                                                        | 6.521  |          |          | 1.687      | 7.298  |          |          |              |        |          |          |                |        |          |          | 0.593        | 8.392  |          |          |                |        |          |          |                         |     |       |       |    |    |    |   |   |   |   |  |
|               | AAL94326.1   O6-methylguanine-DNA methyltransferase          |        |          |          |            |        |          |          |              |        |          |          |                |        |          |          |              |        |          |          |                |        |          |          |                         |     |       |       |    |    |    |   |   |   |   |  |
| <b>FN0118</b> | -0.984                                                       | 12.145 | 2.653e-3 | 1.89e-3  | -0.444     | 12.870 | 2.452e-3 | 8.742e-3 | -0.308       | 12.617 | 5.011e-6 | 1.143e-6 | 0.675          | 11.837 | 1.078e-2 | 8.521e-3 | 0.540        | 11.886 | 3.846e-2 | 1.406e-2 | 0.135          | 12.562 | 4.615e-2 | 2.036e-1 |                         |     |       |       |    |    |    |   |   |   |   |  |
|               | AAL94327.1   Chaperone protein dnaJ                          |        |          |          |            |        |          |          |              |        |          |          |                |        |          |          |              |        |          |          |                |        |          |          |                         |     |       |       |    |    |    |   |   |   |   |  |
| <b>FN0119</b> | 1.972                                                        | 9.137  |          |          | 2.217      | 9.566  | 7.543e-3 | 3.351e-2 |              |        |          |          |                |        |          |          | 0.245        | 11.539 |          |          |                |        |          |          |                         |     |       |       |    |    |    |   |   |   |   |  |
|               | AAL94328.1   Flavodoxin                                      |        |          |          |            |        |          |          |              |        |          |          |                |        |          |          |              |        |          |          |                |        |          |          |                         |     |       |       |    |    |    |   |   |   |   |  |
| <b>FN0123</b> | -0.480                                                       | 5.124  |          |          | -0.005     | 5.782  | 1.538e-1 | 9.655e-1 |              |        |          |          |                |        |          |          | 0.474        | 5.303  |          |          |                |        |          |          |                         |     |       |       |    |    |    |   |   |   |   |  |
|               | AAL94332.1   ATPase                                          |        |          |          |            |        |          |          |              |        |          |          |                |        |          |          |              |        |          |          |                |        |          |          |                         |     |       |       |    |    |    |   |   |   |   |  |
| <b>FN0127</b> |                                                              |        |          |          |            |        |          |          |              |        |          |          |                |        |          |          | 0.209        | 5.302  |          |          |                |        |          |          |                         |     |       |       |    |    |    |   |   |   |   |  |
|               | AAL94333.1   Fe-S oxidoreductase                             |        |          |          |            |        |          |          |              |        |          |          |                |        |          |          |              |        |          |          |                |        |          |          |                         |     |       |       |    |    |    |   |   |   |   |  |
| <b>FN0128</b> | -0.982                                                       | 9.077  | 3.37e-3  | 2.639e-3 | -0.987     | 9.255  | 6.848e-3 | 2.989e-2 | -1.639       | 8.215  | 3.046e-4 | 5.156e-4 | -0.658         | 7.437  | 8.064e-3 | 5.4e-3   | -0.006       | 8.274  | 4.311e-1 | 9.893e-1 | -0.652         | 7.616  | 6.216e-2 | 2.842e-1 |                         |     |       |       |    |    |    |   |   |   |   |  |
|               | AAL94334.1   Spermidine/putrescine-binding protein           |        |          |          |            |        |          |          |              |        |          |          |                |        |          |          |              |        |          |          |                |        |          |          |                         |     |       |       |    |    |    |   |   |   |   |  |
| <b>FN0129</b> |                                                              |        |          |          |            |        |          |          |              |        |          |          |                |        |          |          |              |        |          |          |                |        |          |          |                         |     |       |       |    |    |    |   |   |   |   |  |
|               | AAL94335.1   Urease accessory protein ureG                   |        |          |          |            |        |          |          |              |        |          |          |                |        |          |          |              |        |          |          |                |        |          |          |                         |     |       |       |    |    |    |   |   |   |   |  |
| <b>FN0130</b> | -1.187                                                       | 7.187  |          |          | -0.093     | 8.466  |          |          | -0.159       | 8.012  |          |          | 1.028          | 7.028  |          |          | 1.094        | 7.279  |          |          | -0.066         | 8.307  | 1.747e-1 | 9.157e-1 |                         |     |       |       |    |    |    |   |   |   |   |  |
|               | AAL94336.1   ABC transporter ATP-binding protein             |        |          |          |            |        |          |          |              |        |          |          |                |        |          |          |              |        |          |          |                |        |          |          |                         |     |       |       |    |    |    |   |   |   |   |  |
| <b>FN0132</b> | -0.378                                                       | 5.575  |          |          | -0.484     | 5.654  |          |          | 0.425        | 6.174  |          |          | 0.803          | 5.999  | 3.244e-2 | 4.268e-2 | -0.105       | 5.275  |          |          | 0.908          | 6.078  |          |          |                         |     |       |       |    |    |    |   |   |   |   |  |
|               | AAL93916.1   Hemolysin                                       |        |          |          |            |        |          |          |              |        |          |          |                |        |          |          |              |        |          |          |                |        |          |          |                         |     |       |       |    |    |    |   |   |   |   |  |

Show detected proteins only  
 Show all proteins  
 Filter by category:

Proteins found:  
1424

Enter (or paste) list of ORFs

Find ORFs

Test Cutoff

q-Value p-Value

.005

Dot Plots

Dot Plots

| Signif | Direction | Applies To   |
|--------|-----------|--------------|
| yes    | +         | ratios, bars |
| no     | n/a       | bars         |
| yes    | -         | ratios, bars |
| yes    | +         | p-, q-Values |
| yes    | -         | p-, q-Values |

FnPg vs Fn

FnPgSg vs Fn

FnSg vs FnPg

FnPgSg vs FnSg

FnSg vs Fn

FnPgSg vs FnPg

FnPgSg vs FnSg

Fn Summary Table FnPg vs Fn FnSg vs Fn FnPgSg vs Fn FnPgSg vs FnPg FnSg vs FnPg FnPgSg vs FnSg Fn Coverage

| ORF           | FnPg vs Fn                                                     |        |          |          | FnSg vs Fn |        |          |          | FnPgSg vs Fn |        |          |          | FnPgSg vs FnPg |        |          |          | FnSg vs FnPg |        |          |          | FnPgSg vs FnSg |        |          |          | Log <sub>2</sub> Ratios |     |       |       |    |    |    |   |   |   |   |  |
|---------------|----------------------------------------------------------------|--------|----------|----------|------------|--------|----------|----------|--------------|--------|----------|----------|----------------|--------|----------|----------|--------------|--------|----------|----------|----------------|--------|----------|----------|-------------------------|-----|-------|-------|----|----|----|---|---|---|---|--|
|               | Ratio                                                          | Sum    | q-Val    | p-Val    | Ratio      | Sum    | q-Val    | p-Val    | Ratio        | Sum    | q-Val    | p-Val    | Ratio          | Sum    | q-Val    | p-Val    | Ratio        | Sum    | q-Val    | p-Val    | Ratio          | Sum    | q-Val    | p-Val    | Ratio                   | Sum | q-Val | p-Val | -6 | -4 | -2 | 0 | 2 | 4 | 6 |  |
| <b>FN0147</b> | -0.966                                                         | 10.162 | 1.213e-2 | 1.427e-2 | -0.653     | 10.659 | 7.029e-4 | 1.917e-3 | -0.837       | 10.087 | 3.929e-6 | 8.249e-7 | 0.129          | 9.325  | 2.133e-1 | 6.501e-1 | 0.313        | 9.694  | 1.912e-1 | 2.911e-1 | -0.184         | 9.822  | 2.855e-2 | 1.178e-1 |                         |     |       |       |    |    |    |   |   |   |   |  |
|               | AAL94353.1   PLSX protein                                      |        |          |          |            |        |          |          |              |        |          |          |                |        |          |          |              |        |          |          |                |        |          |          |                         |     |       |       |    |    |    |   |   |   |   |  |
| <b>FN0148</b> | -0.177                                                         | 16.026 | 5.895e-2 | 1.129e-1 | -0.203     | 16.184 | 7.082e-2 | 4.05e-1  | -0.054       | 15.945 | 3.576e-2 | 1.767e-1 | 0.123          | 15.972 | 1.034e-1 | 2.317e-1 | -0.026       | 16.008 | 4.133e-1 | 9.196e-1 | 0.149          | 16.131 | 1.1e-1   | 5.344e-1 |                         |     |       |       |    |    |    |   |   |   |   |  |
|               | AAL94354.1   3-oxoacyl-[acyl-carrier-protein] synthase III     |        |          |          |            |        |          |          |              |        |          |          |                |        |          |          |              |        |          |          |                |        |          |          |                         |     |       |       |    |    |    |   |   |   |   |  |
| <b>FN0149</b> | -0.210                                                         | 15.914 | 1.751e-1 | 4.672e-1 | -1.231     | 15.077 | 7.309e-4 | 2.022e-3 | -0.142       | 15.778 | 8.342e-2 | 4.585e-1 | 0.068          | 15.772 | 2.541e-1 | 8.167e-1 | -1.021       | 14.867 | 7.968e-2 | 5.358e-2 | 1.089          | 14.935 | 1.855e-3 | 4.21e-3  |                         |     |       |       |    |    |    |   |   |   |   |  |
|               | AAL94355.1   Malonyl-CoA-[acyl-carrier-protein] transacylase   |        |          |          |            |        |          |          |              |        |          |          |                |        |          |          |              |        |          |          |                |        |          |          |                         |     |       |       |    |    |    |   |   |   |   |  |
| <b>FN0150</b> | -0.746                                                         | 11.656 | 8.561e-4 | 3.661e-4 | -1.071     | 11.516 | 6.755e-5 | 9.361e-5 | -0.199       | 12.000 | 1.166e-2 | 4.904e-2 | 0.548          | 11.458 | 3.038e-3 | 1.249e-3 | -0.325       | 10.769 | 6.703e-2 | 3.818e-2 | 0.873          | 11.317 | 2.254e-4 | 2.589e-4 |                         |     |       |       |    |    |    |   |   |   |   |  |
|               | AAL94356.1   Acyl carrier protein                              |        |          |          |            |        |          |          |              |        |          |          |                |        |          |          |              |        |          |          |                |        |          |          |                         |     |       |       |    |    |    |   |   |   |   |  |
| <b>FN0151</b> | -0.793                                                         | 19.262 | 5.296e-2 | 9.695e-2 | -0.661     | 19.578 | 7.627e-3 | 3.394e-2 | -0.016       | 19.835 | 1.398e-1 | 8.225e-1 | 0.776          | 19.246 | 5.85e-2  | 1.01e-1  | 0.132        | 18.786 | 3.797e-1 | 7.991e-1 | 0.645          | 19.562 | 9.456e-3 | 3.276e-2 |                         |     |       |       |    |    |    |   |   |   |   |  |
|               | AAL94357.1   3-oxoacyl-[acyl-carrier-protein] synthase         |        |          |          |            |        |          |          |              |        |          |          |                |        |          |          |              |        |          |          |                |        |          |          |                         |     |       |       |    |    |    |   |   |   |   |  |
| <b>FN0152</b> | 0.663                                                          | 5.337  |          |          | 0.571      | 5.429  |          |          | 0.444        | 4.915  |          |          | -0.219         | 5.781  |          |          | -0.092       | 6.092  |          |          | -0.126         | 5.874  |          |          |                         |     |       |       |    |    |    |   |   |   |   |  |
|               | AAL94358.1   Ribonuclease III                                  |        |          |          |            |        |          |          |              |        |          |          |                |        |          |          |              |        |          |          |                |        |          |          |                         |     |       |       |    |    |    |   |   |   |   |  |
| <b>FN0153</b> |                                                                |        |          |          |            |        |          |          |              |        |          |          |                |        |          |          |              |        |          |          |                |        |          |          |                         |     |       |       |    |    |    |   |   |   |   |  |
|               | AAL94359.1   Oxygen-independent coproporphyrinogen III oxidase |        |          |          |            |        |          |          |              |        |          |          |                |        |          |          |              |        |          |          |                |        |          |          |                         |     |       |       |    |    |    |   |   |   |   |  |
| <b>FN0154</b> |                                                                |        |          |          |            |        |          |          | -0.307       | 5.666  |          |          |                |        |          |          |              |        |          |          |                |        |          |          |                         |     |       |       |    |    |    |   |   |   |   |  |
|               | AAL94360.1   Ribonuclease G                                    |        |          |          |            |        |          |          |              |        |          |          |                |        |          |          |              |        |          |          |                |        |          |          |                         |     |       |       |    |    |    |   |   |   |   |  |
| <b>FN0155</b> |                                                                |        |          |          | -1.221     | 5.865  |          |          | -0.070       | 6.627  |          |          |                |        |          |          |              |        |          |          | 1.151          | 5.795  |          |          |                         |     |       |       |    |    |    |   |   |   |   |  |
|               | AAL94361.1   Hypothetical protein                              |        |          |          |            |        |          |          |              |        |          |          |                |        |          |          |              |        |          |          |                |        |          |          |                         |     |       |       |    |    |    |   |   |   |   |  |
| <b>FN0156</b> | -0.497                                                         | 7.347  | 1.051e-1 | 2.418e-1 | -0.196     | 7.832  | 1.188e-1 | 7.161e-1 | 0.307        | 7.947  | 1.625e-4 | 2.15e-4  | 0.804          | 7.654  | 4.903e-2 | 7.721e-2 | 0.301        | 7.335  | 3.425e-1 | 6.801e-1 | 0.503          | 8.139  | 7.204e-2 | 3.354e-1 |                         |     |       |       |    |    |    |   |   |   |   |  |
|               | AAL94362.1   Phosphopantetheine adenylyltransferase            |        |          |          |            |        |          |          |              |        |          |          |                |        |          |          |              |        |          |          |                |        |          |          |                         |     |       |       |    |    |    |   |   |   |   |  |
| <b>FN0157</b> |                                                                |        |          |          | -0.237     | 6.014  | 1.592e-3 | 5.208e-3 |              |        |          |          |                |        |          |          |              |        |          |          |                |        |          |          |                         |     |       |       |    |    |    |   |   |   |   |  |
|               | AAL94363.1   DNA repair protein RadA                           |        |          |          |            |        |          |          |              |        |          |          |                |        |          |          |              |        |          |          |                |        |          |          |                         |     |       |       |    |    |    |   |   |   |   |  |
| <b>FN0158</b> | -0.530                                                         | 9.206  | 3.161e-2 | 4.837e-2 | 0.623      | 10.543 | 2.694e-3 | 9.808e-3 | -0.730       | 8.802  | 5.307e-3 | 1.963e-2 | -0.200         | 8.476  | 1.591e-1 | 4.339e-1 | 1.153        | 10.013 | 6.506e-3 | 8.764e-4 | -1.353         | 9.813  | 4.684e-4 | 6.842e-4 |                         |     |       |       |    |    |    |   |   |   |   |  |
|               | AAL94364.1   DNA-binding protein                               |        |          |          |            |        |          |          |              |        |          |          |                |        |          |          |              |        |          |          |                |        |          |          |                         |     |       |       |    |    |    |   |   |   |   |  |
| <b>FN0161</b> |                                                                |        |          |          |            |        |          |          |              |        |          |          |                |        |          |          |              |        |          |          |                |        |          |          |                         |     |       |       |    |    |    |   |   |   |   |  |
|               | AAL94367.1   RNA-directed DNA polymerase                       |        |          |          |            |        |          |          |              |        |          |          |                |        |          |          |              |        |          |          |                |        |          |          |                         |     |       |       |    |    |    |   |   |   |   |  |
| <b>FN0164</b> | -0.769                                                         | 15.858 | 1.169e-3 | 6.076e-4 | -0.239     | 16.573 | 5.724e-2 | 3.226e-1 | -1.297       | 15.126 | 3.319e-4 | 5.799e-4 | -0.528         | 14.561 | 2.508e-2 | 2.927e-2 | 0.530        | 15.804 | 1.25e-1  | 1.294e-1 | -1.058         | 15.276 | 1.113e-2 | 3.991e-2 |                         |     |       |       |    |    |    |   |   |   |   |  |
|               | AAL94370.1   Anhydro-N-acetylmuramyl-tripeptide amidase        |        |          |          |            |        |          |          |              |        |          |          |                |        |          |          |              |        |          |          |                |        |          |          |                         |     |       |       |    |    |    |   |   |   |   |  |
| <b>FN0170</b> | 0.112                                                          | 13.730 | 2.35e-1  | 6.85e-1  | 0.706      | 14.509 | 8.89e-3  | 4.064e-2 | 0.137        | 13.551 | 1.406e-3 | 3.848e-3 | 0.025          | 13.867 | 2.779e-1 | 9.227e-1 | 0.594        | 14.620 | 9.347e-2 | 7.553e-2 | -0.569         | 14.645 | 1.633e-2 | 6.229e-2 |                         |     |       |       |    |    |    |   |   |   |   |  |
|               | AAL94376.1   GTP-binding protein                               |        |          |          |            |        |          |          |              |        |          |          |                |        |          |          |              |        |          |          |                |        |          |          |                         |     |       |       |    |    |    |   |   |   |   |  |
| <b>FN0173</b> | -0.778                                                         | 10.805 | 8.21e-2  | 1.76e-1  | 0.018      | 11.786 | 1.478e-1 | 9.213e-1 | 0.284        | 11.663 | 6.328e-3 | 2.416e-2 | 1.062          | 11.089 | 4.654e-2 | 7.143e-2 | 0.796        | 11.007 | 1.436e-1 | 1.723e-1 | 0.266          | 12.069 | 4.161e-2 | 1.811e-1 |                         |     |       |       |    |    |    |   |   |   |   |  |
|               | AAL94379.1   Hypothetical protein                              |        |          |          |            |        |          |          |              |        |          |          |                |        |          |          |              |        |          |          |                |        |          |          |                         |     |       |       |    |    |    |   |   |   |   |  |
| <b>FN0174</b> | -0.124                                                         | 12.708 | 7.411e-2 | 1.536e-1 | -0.094     | 12.923 | 4.424e-2 | 2.442e-1 | 0.849        | 13.478 | 3.396e-3 | 1.143e-2 | 0.973          | 13.558 | 1.273e-2 | 1.087e-2 | 0.030        | 12.799 | 1.465e-1 | 1.801e-1 | 0.943          | 13.772 | 4.162e-3 | 1.176e-2 |                         |     |       |       |    |    |    |   |   |   |   |  |
|               | AAL94380.1   Enoyl-[acyl-carrier-protein] reductase            |        |          |          |            |        |          |          |              |        |          |          |                |        |          |          |              |        |          |          |                |        |          |          |                         |     |       |       |    |    |    |   |   |   |   |  |

Show detected proteins only  
 Show all proteins

Filter by category:  
GO: amino acid transport

Proteins found: 1424

Enter (or paste) list of ORFs

Find ORFs

Test Cutoff

q-Value p-Value

.005

Dot Plots

| Signif | Direction | Applies To   |
|--------|-----------|--------------|
| yes    | +         | ratios, bars |
| no     | n/a       | bars         |
| yes    | -         | ratios, bars |
| yes    | +         | p-, q-Values |
| yes    | -         | p-, q-Values |

FnPg vs Fn — █ — FnSg vs Fn

FnPgSg vs Fn — █ — FnPgSg vs FnPg

FnSg vs FnPg — █ — FnPgSg vs FnSg

Fn Summary Table

FnPg vs Fn

FnSg vs Fn

FnPgSg vs Fn

FnPgSg vs FnPg

FnSg vs FnPg

FnPgSg vs FnSg

Fn Coverage

| ORF                                                  | FnPg vs Fn    |        |          |          | FnSg vs Fn    |        |          |          | FnPgSg vs Fn  |        |          |          | FnPgSg vs FnPg |        |          |          | FnSg vs FnPg |        |          |          | FnPgSg vs FnSg |        |          |          | Log <sub>2</sub> Ratios |     |       |       |    |    |    |   |   |   |   |  |
|------------------------------------------------------|---------------|--------|----------|----------|---------------|--------|----------|----------|---------------|--------|----------|----------|----------------|--------|----------|----------|--------------|--------|----------|----------|----------------|--------|----------|----------|-------------------------|-----|-------|-------|----|----|----|---|---|---|---|--|
|                                                      | Ratio         | Sum    | q-Val    | p-Val    | Ratio         | Sum    | q-Val    | p-Val    | Ratio         | Sum    | q-Val    | p-Val    | Ratio          | Sum    | q-Val    | p-Val    | Ratio        | Sum    | q-Val    | p-Val    | Ratio          | Sum    | q-Val    | p-Val    | Ratio                   | Sum | q-Val | p-Val | -6 | -4 | -2 | 0 | 2 | 4 | 6 |  |
| <b>FN0175</b>                                        | -0.146        | 8.119  | 1.763e-1 | 4.719e-1 | <b>0.907</b>  | 9.357  | 1.103e-3 | 3.347e-3 | -0.214        | 7.848  |          |          | -0.068         | 7.905  |          |          | 1.054        | 9.211  | 6.296e-3 | 8.271e-4 | -1.121         | 9.143  |          |          |                         |     |       |       |    |    |    |   |   |   |   |  |
| AAL94381.1   Cell division inhibitor MinC            |               |        |          |          |               |        |          |          |               |        |          |          |                |        |          |          |              |        |          |          |                |        |          |          |                         |     |       |       |    |    |    |   |   |   |   |  |
| <b>FN0176</b>                                        | 0.146         | 15.160 | 7.733e-2 | 1.624e-1 | <b>0.785</b>  | 15.983 | 1.232e-4 | 2.054e-4 | 0.209         | 15.019 | 2.682e-2 | 1.26e-1  | 0.063          | 15.369 | 2.052e-1 | 6.188e-1 | <b>0.638</b> | 16.129 | 3.194e-3 | 2.913e-4 | <b>-0.576</b>  | 16.192 | 7.056e-4 | 1.212e-3 |                         |     |       |       |    |    |    |   |   |   |   |  |
| AAL94382.1   Cell division inhibitor MinD            |               |        |          |          |               |        |          |          |               |        |          |          |                |        |          |          |              |        |          |          |                |        |          |          |                         |     |       |       |    |    |    |   |   |   |   |  |
| <b>FN0177</b>                                        | -1.762        | 5.841  |          |          |               |        |          |          | -0.050        | 7.349  | 1.285e-1 | 7.461e-1 | 1.712          | 5.790  |          |          |              |        |          |          |                |        |          |          |                         |     |       |       |    |    |    |   |   |   |   |  |
| AAL94383.1   Cell division inhibitor MinE            |               |        |          |          |               |        |          |          |               |        |          |          |                |        |          |          |              |        |          |          |                |        |          |          |                         |     |       |       |    |    |    |   |   |   |   |  |
| <b>FN0178</b>                                        | <b>-1.229</b> | 11.977 | 5.813e-4 | 1.931e-4 | <b>-1.525</b> | 11.866 | 9.301e-7 | 1.343e-7 | <b>-0.978</b> | 12.024 | 3.175e-5 | 1.88e-5  | 0.251          | 10.999 | 7.306e-2 | 1.371e-1 | -0.296       | 10.637 | 1.257e-1 | 1.31e-1  | <b>0.546</b>   | 10.888 | 1.39e-3  | 2.937e-3 |                         |     |       |       |    |    |    |   |   |   |   |  |
| AAL94384.1   UNC-44 ankyrins                         |               |        |          |          |               |        |          |          |               |        |          |          |                |        |          |          |              |        |          |          |                |        |          |          |                         |     |       |       |    |    |    |   |   |   |   |  |
| <b>FN0179</b>                                        | 1.260         | 11.281 | 9.709e-2 | 2.186e-1 | -0.200        | 10.006 | 8.015e-2 | 4.63e-1  | -0.461        | 9.357  | 1.498e-2 | 6.506e-2 | -1.721         | 10.821 | 8.15e-2  | 1.602e-1 | -1.460       | 11.266 | 1.493e-1 | 1.882e-1 | -0.260         | 9.545  | 9.701e-2 | 4.647e-1 |                         |     |       |       |    |    |    |   |   |   |   |  |
| AAL94385.1   Ankyrin repeat proteins                 |               |        |          |          |               |        |          |          |               |        |          |          |                |        |          |          |              |        |          |          |                |        |          |          |                         |     |       |       |    |    |    |   |   |   |   |  |
| <b>FN0180</b>                                        |               |        |          |          |               |        |          |          |               |        |          |          |                |        |          |          |              |        |          |          | 0.708          | 5.680  |          |          |                         |     |       |       |    |    |    |   |   |   |   |  |
| AAL94386.1   Tetratricopeptide repeat family protein |               |        |          |          |               |        |          |          |               |        |          |          |                |        |          |          |              |        |          |          |                |        |          |          |                         |     |       |       |    |    |    |   |   |   |   |  |
| <b>FN0181</b>                                        | 0.337         | 9.382  | 1.942e-1 | 5.371e-1 | 0.505         | 9.734  | 1.944e-2 | 9.927e-2 | -0.669        | 8.172  | 3.035e-2 | 1.456e-1 | -1.006         | 8.713  | 8.424e-2 | 1.682e-1 | 0.168        | 10.072 | 3.454e-1 | 6.89e-1  | <b>-1.174</b>  | 9.065  | 1.618e-3 | 3.554e-3 |                         |     |       |       |    |    |    |   |   |   |   |  |
| AAL94387.1   Hypothetical protein                    |               |        |          |          |               |        |          |          |               |        |          |          |                |        |          |          |              |        |          |          |                |        |          |          |                         |     |       |       |    |    |    |   |   |   |   |  |
| <b>FN0182</b>                                        | 1.741         | 13.880 | 9.767e-2 | 2.203e-1 | <b>3.099</b>  | 15.422 | 3.534e-7 | 3.74e-8  | -0.020        | 11.915 | 1.551e-1 | 9.294e-1 | -1.761         | 13.860 | 9.97e-2  | 2.183e-1 | 1.358        | 17.164 | 6.972e-2 | 4.109e-2 | <b>-3.119</b>  | 15.402 | 1.447e-5 | 5.349e-6 |                         |     |       |       |    |    |    |   |   |   |   |  |
| AAL94388.1   Sarcosine oxidase alpha subunit         |               |        |          |          |               |        |          |          |               |        |          |          |                |        |          |          |              |        |          |          |                |        |          |          |                         |     |       |       |    |    |    |   |   |   |   |  |
| <b>FN0183</b>                                        | 0.669         | 14.512 | 1.728e-1 | 4.589e-1 | <b>1.523</b>  | 15.550 | 3.969e-5 | 4.325e-5 | 0.222         | 13.861 | 4.094e-2 | 2.068e-1 | -0.448         | 14.734 | 1.98e-1  | 5.877e-1 | 0.853        | 16.220 | 1.397e-1 | 1.623e-1 | <b>-1.301</b>  | 15.772 | 4.587e-5 | 3.095e-5 |                         |     |       |       |    |    |    |   |   |   |   |  |
| AAL94389.1   Glycerol-3-phosphate dehydrogenase      |               |        |          |          |               |        |          |          |               |        |          |          |                |        |          |          |              |        |          |          |                |        |          |          |                         |     |       |       |    |    |    |   |   |   |   |  |
| <b>FN0185</b>                                        | -0.190        | 8.139  | 2.186e-1 | 6.238e-1 | 0.084         | 8.597  | 1.319e-1 | 8.073e-1 | -0.703        | 7.422  | 3.725e-2 | 1.852e-1 | -0.513         | 7.436  | 6.967e-3 | 4.177e-3 | 0.274        | 8.408  | 8.045e-3 | 1.272e-3 | <b>-0.787</b>  | 7.895  | 3.582e-4 | 4.845e-4 |                         |     |       |       |    |    |    |   |   |   |   |  |
| AAL94391.1   Hypothetical protein                    |               |        |          |          |               |        |          |          |               |        |          |          |                |        |          |          |              |        |          |          |                |        |          |          |                         |     |       |       |    |    |    |   |   |   |   |  |
| <b>FN0188</b>                                        |               |        |          |          |               |        |          |          |               |        |          |          |                |        |          |          |              |        |          |          |                |        |          |          |                         |     |       |       |    |    |    |   |   |   |   |  |
| AAL94394.1   Peptide methionine sulfoxide reductase  |               |        |          |          |               |        |          |          |               |        |          |          |                |        |          |          |              |        |          |          |                |        |          |          |                         |     |       |       |    |    |    |   |   |   |   |  |
| <b>FN0189</b>                                        |               |        |          |          |               |        |          |          |               |        |          |          | -1.400         | 7.244  |          |          | -0.627       | 8.202  |          |          | <b>-0.773</b>  | 6.802  | 4.787e-3 | 1.42e-2  |                         |     |       |       |    |    |    |   |   |   |   |  |
| AAL94395.1   Two-component response regulator yesN   |               |        |          |          |               |        |          |          |               |        |          |          |                |        |          |          |              |        |          |          |                |        |          |          |                         |     |       |       |    |    |    |   |   |   |   |  |
| <b>FN0190</b>                                        | -0.711        | 5.687  |          |          | -0.535        | 6.047  |          |          |               |        |          |          |                |        |          |          | 0.175        | 5.336  | 3.371e-1 | 6.64e-1  |                |        |          |          |                         |     |       |       |    |    |    |   |   |   |   |  |
| AAL94396.1   Two-component sensor kinase yesM        |               |        |          |          |               |        |          |          |               |        |          |          |                |        |          |          |              |        |          |          |                |        |          |          |                         |     |       |       |    |    |    |   |   |   |   |  |
| <b>FN0191</b>                                        | 0.135         | 9.220  | 2.069e-1 | 5.817e-1 | 0.605         | 9.874  | 1.279e-2 | 6.207e-2 | -0.956        | 7.924  | 5.339e-3 | 1.977e-2 | -1.092         | 8.263  | 2.389e-2 | 2.73e-2  | 0.470        | 10.009 | 1.254e-1 | 1.304e-1 | <b>-1.562</b>  | 8.917  | 2.196e-3 | 5.195e-3 |                         |     |       |       |    |    |    |   |   |   |   |  |
| AAL94397.1   helix-turn-helix DNA-binding protein    |               |        |          |          |               |        |          |          |               |        |          |          |                |        |          |          |              |        |          |          |                |        |          |          |                         |     |       |       |    |    |    |   |   |   |   |  |
| <b>FN0192</b>                                        | -2.863        | 10.863 |          |          | <b>-2.532</b> | 11.379 | 5.468e-5 | 6.886e-5 | <b>-1.560</b> | 11.963 | 2.817e-4 | 4.648e-4 | 1.303          | 9.303  |          |          | 0.331        | 8.516  |          |          | <b>0.972</b>   | 9.819  | 7.334e-4 | 1.277e-3 |                         |     |       |       |    |    |    |   |   |   |   |  |
| AAL94398.1   Dipeptide-binding protein               |               |        |          |          |               |        |          |          |               |        |          |          |                |        |          |          |              |        |          |          |                |        |          |          |                         |     |       |       |    |    |    |   |   |   |   |  |
| <b>FN0197</b>                                        |               |        |          |          | -0.162        | 4.806  |          |          |               |        |          |          |                |        |          |          |              |        |          |          |                |        |          |          |                         |     |       |       |    |    |    |   |   |   |   |  |
| AAL94403.1   Methyltransferase                       |               |        |          |          |               |        |          |          |               |        |          |          |                |        |          |          |              |        |          |          |                |        |          |          |                         |     |       |       |    |    |    |   |   |   |   |  |
| <b>FN0198</b>                                        |               |        |          |          |               |        |          |          | 0.119         | 5.211  | 1.087e-1 | 6.173e-1 |                |        |          |          |              |        |          |          |                |        |          |          |                         |     |       |       |    |    |    |   |   |   |   |  |
| AAL94404.1   Transcriptional regulatory protein      |               |        |          |          |               |        |          |          |               |        |          |          |                |        |          |          |              |        |          |          |                |        |          |          |                         |     |       |       |    |    |    |   |   |   |   |  |

Show detected proteins only  
 Show all proteins

Filter by category:  
GO: amino acid transport

Proteins found: 1424

Enter (or paste) list of ORFs

Find ORFs

Test Cutoff

q-Value p-Value

.005

Dot Plots

| Signif | Direction | Applies To   |
|--------|-----------|--------------|
| yes    | +         | ratios, bars |
| no     | n/a       | bars         |
| yes    | -         | ratios, bars |
| yes    | +         | p-, q-Values |
| yes    | -         | p-, q-Values |

FnPg vs Fn — █ — FnSg vs Fn

FnPgSg vs Fn — █ — FnPgSg vs FnPg

FnSg vs FnPg — █ — FnPgSg vs FnSg

Fn Summary Table

FnPg vs Fn

FnSg vs Fn

FnPgSg vs Fn

FnPgSg vs FnPg

FnSg vs FnPg

FnPgSg vs FnSg

Fn Coverage

| ORF                                                                          | FnPg vs Fn |        |          |          | FnSg vs Fn |        |          |          | FnPgSg vs Fn |        |          |          | FnPgSg vs FnPg |        |          |          | FnSg vs FnPg |        |          |          | FnPgSg vs FnSg |        |          |          | Log <sub>2</sub> Ratios |     |       |       |    |    |    |   |   |   |   |  |
|------------------------------------------------------------------------------|------------|--------|----------|----------|------------|--------|----------|----------|--------------|--------|----------|----------|----------------|--------|----------|----------|--------------|--------|----------|----------|----------------|--------|----------|----------|-------------------------|-----|-------|-------|----|----|----|---|---|---|---|--|
|                                                                              | Ratio      | Sum    | q-Val    | p-Val    | Ratio      | Sum    | q-Val    | p-Val    | Ratio        | Sum    | q-Val    | p-Val    | Ratio          | Sum    | q-Val    | p-Val    | Ratio        | Sum    | q-Val    | p-Val    | Ratio          | Sum    | q-Val    | p-Val    | Ratio                   | Sum | q-Val | p-Val | -6 | -4 | -2 | 0 | 2 | 4 | 6 |  |
| <b>FN0199</b>                                                                | 0.589      | 11.112 | 1.742e-3 | 1.054e-3 | 0.776      | 11.484 | 1.755e-4 | 3.272e-4 | 0.034        | 10.353 | 1.476e-1 | 8.765e-1 | -0.556         | 11.146 | 2.543e-2 | 2.985e-2 | 0.187        | 12.073 | 9.129e-2 | 7.165e-2 | -0.742         | 11.518 | 3.161e-3 | 8.198e-3 |                         |     |       |       |    |    |    |   |   |   |   |  |
| AAL94405.1   Hypothetical protein                                            |            |        |          |          |            |        |          |          |              |        |          |          |                |        |          |          |              |        |          |          |                |        |          |          |                         |     |       |       |    |    |    |   |   |   |   |  |
| <b>FN0200</b>                                                                | -1.336     | 20.587 | 1.877e-2 | 2.497e-2 | -2.133     | 19.975 | 1.742e-7 | 1.324e-8 | -1.580       | 20.140 | 6.631e-7 | 7.146e-8 | -0.244         | 19.007 | 2.26e-1  | 6.999e-1 | -0.797       | 18.638 | 2.076e-2 | 3.302e-1 | 0.553          | 18.395 | 8.884e-6 | 2.354e-6 |                         |     |       |       |    |    |    |   |   |   |   |  |
| AAL94406.1   Biotin carboxyl carrier protein of glutaconyl-CoA decarboxylase |            |        |          |          |            |        |          |          |              |        |          |          |                |        |          |          |              |        |          |          |                |        |          |          |                         |     |       |       |    |    |    |   |   |   |   |  |
| <b>FN0202</b>                                                                | -0.590     | 19.813 | 2.697e-3 | 1.932e-3 | -0.967     | 19.622 | 6.741e-5 | 9.332e-5 | 0.046        | 20.246 | 1.346e-1 | 7.871e-1 | 0.637          | 19.860 | 3.092e-2 | 3.975e-2 | -0.376       | 19.031 | 1.858e-2 | 4.165e-3 | 1.013          | 19.668 | 4.71e-3  | 1.39e-2  |                         |     |       |       |    |    |    |   |   |   |   |  |
| AAL94408.1   Glutaconate CoA-transferase subunit A                           |            |        |          |          |            |        |          |          |              |        |          |          |                |        |          |          |              |        |          |          |                |        |          |          |                         |     |       |       |    |    |    |   |   |   |   |  |
| <b>FN0203</b>                                                                | 0.084      | 21.144 | 2.282e-1 | 6.59e-1  | -0.582     | 20.663 | 7.506e-4 | 2.098e-3 | -0.570       | 20.287 | 9.913e-4 | 2.364e-3 | -0.654         | 20.575 | 3.03e-2  | 3.86e-2  | -0.666       | 20.747 | 6.635e-2 | 3.747e-2 | 0.012          | 20.093 | 1.755e-1 | 9.207e-1 |                         |     |       |       |    |    |    |   |   |   |   |  |
| AAL94409.1   Glutaconate CoA-transferase subunit B                           |            |        |          |          |            |        |          |          |              |        |          |          |                |        |          |          |              |        |          |          |                |        |          |          |                         |     |       |       |    |    |    |   |   |   |   |  |
| <b>FN0204</b>                                                                | -0.493     | 21.327 | 1.772e-2 | 2.309e-2 | -0.312     | 21.692 | 7.16e-3  | 3.155e-2 | -0.211       | 21.405 | 4.17e-3  | 1.466e-2 | 0.282          | 21.116 | 5.991e-2 | 1.045e-1 | 0.181        | 21.199 | 1.987e-1 | 3.098e-1 | 0.101          | 21.482 | 7.827e-2 | 3.674e-1 |                         |     |       |       |    |    |    |   |   |   |   |  |
| AAL94410.1   Glutaconyl-CoA decarboxylase A subunit                          |            |        |          |          |            |        |          |          |              |        |          |          |                |        |          |          |              |        |          |          |                |        |          |          |                         |     |       |       |    |    |    |   |   |   |   |  |
| <b>FN0206</b>                                                                | -0.444     | 12.567 | 1.01e-1  | 2.3e-1   | -1.164     | 12.032 | 2.516e-4 | 5.09e-4  | -0.994       | 11.813 | 1.258e-6 | 1.822e-7 | -0.550         | 11.572 | 1.166e-1 | 2.787e-1 | -0.719       | 11.587 | 1.542e-1 | 2.005e-1 | 0.170          | 11.038 | 5.194e-2 | 2.327e-1 |                         |     |       |       |    |    |    |   |   |   |   |  |
| AAL94412.1   Activator of (R)-2-hydroxyglutaryl-CoA dehydratase              |            |        |          |          |            |        |          |          |              |        |          |          |                |        |          |          |              |        |          |          |                |        |          |          |                         |     |       |       |    |    |    |   |   |   |   |  |
| <b>FN0207</b>                                                                | -0.327     | 19.040 | 1.127e-1 | 2.635e-1 | -0.565     | 18.986 | 1.392e-5 | 9.757e-6 | -0.338       | 18.825 | 8.945e-5 | 9.205e-5 | -0.011         | 18.701 | 2.878e-1 | 9.689e-1 | -0.238       | 18.659 | 2.657e-1 | 4.725e-1 | 0.227          | 18.648 | 1.91e-4  | 2.051e-4 |                         |     |       |       |    |    |    |   |   |   |   |  |
| AAL94413.1   (R)-2-hydroxyglutaryl-CoA dehydratase alpha-subunit             |            |        |          |          |            |        |          |          |              |        |          |          |                |        |          |          |              |        |          |          |                |        |          |          |                         |     |       |       |    |    |    |   |   |   |   |  |
| <b>FN0208</b>                                                                | -0.455     | 17.834 | 2.923e-3 | 2.161e-3 | -0.732     | 17.742 | 3.443e-4 | 7.682e-4 | -0.233       | 17.852 | 4.31e-4  | 8.251e-4 | 0.222          | 17.601 | 1.793e-2 | 1.826e-2 | -0.277       | 17.287 | 5.334e-2 | 2.581e-2 | 0.499          | 17.509 | 8.199e-4 | 1.491e-3 |                         |     |       |       |    |    |    |   |   |   |   |  |
| AAL94414.1   (R)-2-hydroxyglutaryl-CoA dehydratase beta-subunit              |            |        |          |          |            |        |          |          |              |        |          |          |                |        |          |          |              |        |          |          |                |        |          |          |                         |     |       |       |    |    |    |   |   |   |   |  |
| <b>FN0209</b>                                                                | -0.386     | 17.986 | 7.596e-4 | 2.975e-4 | -0.604     | 17.952 | 5.39e-3  | 2.255e-2 | -0.455       | 17.713 | 3.089e-5 | 1.788e-5 | -0.069         | 17.531 | 8.653e-2 | 1.75e-1  | -0.218       | 17.566 | 1.837e-1 | 2.717e-1 | 0.149          | 17.497 | 9.177e-2 | 4.371e-1 |                         |     |       |       |    |    |    |   |   |   |   |  |
| AAL94415.1   Hypothetical cytosolic protein                                  |            |        |          |          |            |        |          |          |              |        |          |          |                |        |          |          |              |        |          |          |                |        |          |          |                         |     |       |       |    |    |    |   |   |   |   |  |
| <b>FN0212</b>                                                                | -0.009     | 9.149  | 3.045e-1 | 9.76e-1  | -0.493     | 8.850  | 1.5e-3   | 4.861e-3 | -0.593       | 8.361  | 5.343e-3 | 1.979e-2 | -0.584         | 8.556  | 8.801e-2 | 1.795e-1 | -0.484       | 8.841  | 1.657e-1 | 2.279e-1 | -0.101         | 8.257  | 1.233e-1 | 6.084e-1 |                         |     |       |       |    |    |    |   |   |   |   |  |
| AAL94418.1   Hypothetical protein                                            |            |        |          |          |            |        |          |          |              |        |          |          |                |        |          |          |              |        |          |          |                |        |          |          |                         |     |       |       |    |    |    |   |   |   |   |  |
| <b>FN0214</b>                                                                |            |        |          |          |            |        |          |          |              |        |          |          |                |        |          |          |              |        |          |          |                |        |          |          |                         |     |       |       |    |    |    |   |   |   |   |  |
| AAL94420.1   Crossover junction endodeoxyribonuclease ruvC                   |            |        |          |          |            |        |          |          |              |        |          |          |                |        |          |          |              |        |          |          |                |        |          |          |                         |     |       |       |    |    |    |   |   |   |   |  |
| <b>FN0218</b>                                                                | 0.516      | 14.609 | 6.593e-2 | 1.321e-1 | -0.964     | 13.314 | 7.957e-5 | 1.179e-4 | -1.149       | 12.740 | 1.827e-4 | 2.538e-4 | -1.665         | 13.460 | 1.814e-2 | 1.856e-2 | -1.480       | 13.829 | 4.689e-2 | 2.01e-2  | -0.185         | 12.164 | 4.958e-2 | 2.207e-1 |                         |     |       |       |    |    |    |   |   |   |   |  |
| AAL94424.1   Anthranilate synthase component II                              |            |        |          |          |            |        |          |          |              |        |          |          |                |        |          |          |              |        |          |          |                |        |          |          |                         |     |       |       |    |    |    |   |   |   |   |  |
| <b>FN0219</b>                                                                | 0.304      | 4.866  |          |          | 1.435      | 6.180  |          |          | 0.986        | 5.344  |          |          | 0.682          | 5.852  |          |          | 1.130        | 6.485  |          |          | -0.448         | 7.166  |          |          |                         |     |       |       |    |    |    |   |   |   |   |  |
| AAL94425.1   Autolysin response regulator                                    |            |        |          |          |            |        |          |          |              |        |          |          |                |        |          |          |              |        |          |          |                |        |          |          |                         |     |       |       |    |    |    |   |   |   |   |  |
| <b>FN0221</b>                                                                | 0.220      | 11.462 | 3.049e-2 | 4.613e-2 | -0.581     | 10.846 | 2.334e-5 | 2.036e-5 | 0.683        | 11.721 | 9.094e-3 | 3.691e-2 | 0.463          | 12.145 | 4.803e-2 | 7.484e-2 | -0.801       | 11.066 | 1.214e-2 | 2.271e-3 | 1.264          | 11.528 | 4.095e-3 | 1.15e-2  |                         |     |       |       |    |    |    |   |   |   |   |  |
| AAL94427.1   Carbon starvation protein A                                     |            |        |          |          |            |        |          |          |              |        |          |          |                |        |          |          |              |        |          |          |                |        |          |          |                         |     |       |       |    |    |    |   |   |   |   |  |
| <b>FN0224</b>                                                                | -0.910     | 8.992  | 1.518e-2 | 1.886e-2 | -1.410     | 8.676  | 1.294e-3 | 4.071e-3 | -0.636       | 9.062  | 7.015e-3 | 2.723e-2 | 0.274          | 8.356  | 1.616e-1 | 4.431e-1 | -0.500       | 7.766  | 1.859e-1 | 2.773e-1 | 0.774          | 8.040  | 1.765e-2 | 6.82e-2  |                         |     |       |       |    |    |    |   |   |   |   |  |
| AAL94430.1   Excinuclease ABC subunit B                                      |            |        |          |          |            |        |          |          |              |        |          |          |                |        |          |          |              |        |          |          |                |        |          |          |                         |     |       |       |    |    |    |   |   |   |   |  |
| <b>FN0225</b>                                                                |            |        |          |          |            |        |          |          |              |        |          |          |                |        |          |          | -0.507       | 3.677  |          |          |                |        |          |          |                         |     |       |       |    |    |    |   |   |   |   |  |
| AAL94431.1   Gluconate permease                                              |            |        |          |          |            |        |          |          |              |        |          |          |                |        |          |          |              |        |          |          |                |        |          |          |                         |     |       |       |    |    |    |   |   |   |   |  |
| <b>FN0226</b>                                                                | -0.258     | 12.152 | 4.659e-3 | 4.129e-3 | -1.034     | 11.561 | 2.8e-4   | 5.852e-4 | -0.441       | 11.765 | 3.279e-6 | 6.51e-7  | -0.183         | 11.711 | 1.556e-2 | 1.502e-2 | -0.776       | 11.303 | 3.264e-3 | 3.059e-4 | 0.592          | 11.120 | 1.971e-3 | 4.537e-3 |                         |     |       |       |    |    |    |   |   |   |   |  |
| AAL94432.1   Pyridoxal phosphate biosynthetic protein pdxA                   |            |        |          |          |            |        |          |          |              |        |          |          |                |        |          |          |              |        |          |          |                |        |          |          |                         |     |       |       |    |    |    |   |   |   |   |  |

Show detected proteins only

Show all proteins

Filter by category:

GO: amino acid transport

Proteins found: 1424

Enter (or paste) list of ORFs

Find ORFs

Test

q-Value

p-Value

Cutoff

.005

Dot Plots

Dot Plots

| Signif | Direction | Applies To   |
|--------|-----------|--------------|
| yes    | +         | ratios, bars |
| no     | n/a       | bars         |
| yes    | -         | ratios, bars |
| yes    | +         | p-, q-Values |
| yes    | -         | p-, q-Values |

FnPg vs Fn

FnPgSg vs Fn

FnSg vs FnPg

FnSg vs Fn

FnPgSg vs FnPg

FnPgSg vs FnSg



Fn Summary Table

FnPg vs Fn

FnSg vs Fn

FnPgSg vs Fn

FnPgSg vs FnPg

FnSg vs FnPg

FnPgSg vs FnSg

Fn Coverage

| ORF           | FnPg vs Fn                                             |        |          |          | FnSg vs Fn |        |          |          | FnPgSg vs Fn |        |          |          | FnPgSg vs FnPg |        |          |          | FnSg vs FnPg |        |          |          | FnPgSg vs FnSg |        |          |          | Log <sub>2</sub> Ratios |     |       |       |    |    |    |   |   |   |   |  |
|---------------|--------------------------------------------------------|--------|----------|----------|------------|--------|----------|----------|--------------|--------|----------|----------|----------------|--------|----------|----------|--------------|--------|----------|----------|----------------|--------|----------|----------|-------------------------|-----|-------|-------|----|----|----|---|---|---|---|--|
|               | Ratio                                                  | Sum    | q-Val    | p-Val    | Ratio      | Sum    | q-Val    | p-Val    | Ratio        | Sum    | q-Val    | p-Val    | Ratio          | Sum    | q-Val    | p-Val    | Ratio        | Sum    | q-Val    | p-Val    | Ratio          | Sum    | q-Val    | p-Val    | Ratio                   | Sum | q-Val | p-Val | -6 | -4 | -2 | 0 | 2 | 4 | 6 |  |
| <b>FN0227</b> |                                                        |        |          |          |            |        |          |          |              |        |          |          |                |        |          | 0.230    | 4.414        |        |          |          |                |        |          |          |                         |     |       |       |    |    |    |   |   |   |   |  |
|               | AAL94433.1   Hypothetical protein                      |        |          |          |            |        |          |          |              |        |          |          |                |        |          |          |              |        |          |          |                |        |          |          |                         |     |       |       |    |    |    |   |   |   |   |  |
| <b>FN0233</b> | -0.178                                                 | 12.478 | 1.701e-1 | 4.491e-1 | -0.734     | 12.106 | 2.775e-4 | 5.783e-4 | -0.444       | 12.009 | 2.958e-3 | 9.715e-3 | -0.266         | 12.035 | 1.317e-1 | 3.341e-1 | -0.557       | 11.929 | 1.174e-1 | 1.145e-1 | 0.291          | 11.663 | 6.601e-3 | 2.126e-2 |                         |     |       |       |    |    |    |   |   |   |   |  |
|               | AAL94439.1   Hypothetical protein                      |        |          |          |            |        |          |          |              |        |          |          |                |        |          |          |              |        |          |          |                |        |          |          |                         |     |       |       |    |    |    |   |   |   |   |  |
| <b>FN0234</b> | -0.582                                                 | 7.501  |          |          | -0.310     | 7.958  | 1.264e-2 | 6.125e-2 |              |        |          |          |                |        |          |          | 0.272        | 7.375  |          |          |                |        |          |          |                         |     |       |       |    |    |    |   |   |   |   |  |
|               | AAL94440.1   unknown                                   |        |          |          |            |        |          |          |              |        |          |          |                |        |          |          |              |        |          |          |                |        |          |          |                         |     |       |       |    |    |    |   |   |   |   |  |
| <b>FN0235</b> |                                                        |        |          |          |            |        |          |          |              |        |          |          |                |        |          |          |              |        |          |          |                |        |          |          |                         |     |       |       |    |    |    |   |   |   |   |  |
|               | AAL94441.1   ABC transporter ATP-binding protein       |        |          |          |            |        |          |          |              |        |          |          |                |        |          |          |              |        |          |          |                |        |          |          |                         |     |       |       |    |    |    |   |   |   |   |  |
| <b>FN0236</b> | 0.731                                                  | 16.378 | 1.67e-1  | 4.38e-1  | -1.222     | 14.608 | 2.996e-4 | 6.409e-4 | -0.360       | 15.082 | 2.733e-3 | 8.803e-3 | -1.091         | 16.017 | 1.278e-1 | 3.191e-1 | -1.954       | 15.340 | 1.515e-1 | 1.943e-1 | 0.862          | 14.248 | 6.066e-4 | 9.851e-4 |                         |     |       |       |    |    |    |   |   |   |   |  |
|               | AAL94442.1   ABC transporter substrate-binding protein |        |          |          |            |        |          |          |              |        |          |          |                |        |          |          |              |        |          |          |                |        |          |          |                         |     |       |       |    |    |    |   |   |   |   |  |
| <b>FN0237</b> |                                                        |        |          |          |            |        |          |          |              |        |          |          |                |        |          |          |              |        |          |          |                |        |          |          |                         |     |       |       |    |    |    |   |   |   |   |  |
|               | AAL94443.1   ABC transporter permease protein          |        |          |          |            |        |          |          |              |        |          |          |                |        |          |          |              |        |          |          |                |        |          |          |                         |     |       |       |    |    |    |   |   |   |   |  |
| <b>FN0238</b> | -0.136                                                 | 10.982 | 2.095e-1 | 5.91e-1  | -1.033     | 10.270 | 1.535e-4 | 2.777e-4 | -0.547       | 10.368 | 8.482e-3 | 3.398e-2 | -0.410         | 10.436 | 1.077e-1 | 2.483e-1 | -0.897       | 10.134 | 8.445e-2 | 6.049e-2 | 0.486          | 9.723  | 2.967e-2 | 1.23e-1  |                         |     |       |       |    |    |    |   |   |   |   |  |
|               | AAL94444.1   Hypothetical protein                      |        |          |          |            |        |          |          |              |        |          |          |                |        |          |          |              |        |          |          |                |        |          |          |                         |     |       |       |    |    |    |   |   |   |   |  |
| <b>FN0240</b> | -0.078                                                 | 13.135 | 1.549e-1 | 3.959e-1 | -0.797     | 12.601 | 8.865e-4 | 2.574e-3 | -0.155       | 12.854 | 3.066e-2 | 1.474e-1 | -0.077         | 12.981 | 1.268e-1 | 3.154e-1 | -0.719       | 12.523 | 2.403e-2 | 6.248e-3 | 0.642          | 12.446 | 3.401e-3 | 8.998e-3 |                         |     |       |       |    |    |    |   |   |   |   |  |
|               | AAL94446.1   Thymidylate synthase                      |        |          |          |            |        |          |          |              |        |          |          |                |        |          |          |              |        |          |          |                |        |          |          |                         |     |       |       |    |    |    |   |   |   |   |  |
| <b>FN0241</b> | 0.165                                                  | 9.300  | 2.215e-1 | 6.345e-1 | 0.394      | 9.714  | 2.811e-2 | 1.489e-1 | -1.298       | 7.633  | 8.746e-3 | 3.524e-2 | -1.464         | 8.002  | 2.475e-2 | 2.871e-2 | 0.229        | 9.879  | 2.275e-1 | 3.785e-1 | -1.693         | 8.416  | 6.776e-4 | 1.148e-3 |                         |     |       |       |    |    |    |   |   |   |   |  |
|               | AAL94447.1   Dihydrofolate reductase                   |        |          |          |            |        |          |          |              |        |          |          |                |        |          |          |              |        |          |          |                |        |          |          |                         |     |       |       |    |    |    |   |   |   |   |  |
| <b>FN0242</b> | -0.011                                                 | 12.011 |          |          | 0.936      | 13.142 | 2.68e-3  | 9.744e-3 | -1.748       | 10.070 | 2.019e-5 | 9.157e-6 | -1.737         | 10.263 |          |          | 0.947        | 13.131 |          |          | -2.684         | 11.394 | 8.481e-4 | 1.565e-3 |                         |     |       |       |    |    |    |   |   |   |   |  |
|               | AAL94448.1   Trk system potassium uptake protein trkA  |        |          |          |            |        |          |          |              |        |          |          |                |        |          |          |              |        |          |          |                |        |          |          |                         |     |       |       |    |    |    |   |   |   |   |  |
| <b>FN0243</b> | 0.210                                                  | 9.190  |          |          | 0.487      | 9.651  | 5.927e-2 | 3.348e-1 | -2.031       | 6.746  |          |          | -2.241         | 7.160  |          |          | 0.276        | 9.862  |          |          | -2.517         | 7.621  |          |          |                         |     |       |       |    |    |    |   |   |   |   |  |
|               | AAL94449.1   Poly(A) polymerase                        |        |          |          |            |        |          |          |              |        |          |          |                |        |          |          |              |        |          |          |                |        |          |          |                         |     |       |       |    |    |    |   |   |   |   |  |
| <b>FN0244</b> | -1.191                                                 | 7.835  |          |          | -1.640     | 7.571  |          |          |              |        |          |          |                |        |          |          | -0.449       | 6.379  |          |          |                |        |          |          |                         |     |       |       |    |    |    |   |   |   |   |  |
|               | AAL94450.1   COP associated protein                    |        |          |          |            |        |          |          |              |        |          |          |                |        |          |          |              |        |          |          |                |        |          |          |                         |     |       |       |    |    |    |   |   |   |   |  |
| <b>FN0245</b> | -0.922                                                 | 6.922  |          |          | -0.330     | 7.699  | 2.374e-3 | 8.403e-3 | -1.235       | 6.405  |          |          | -0.313         | 5.687  |          |          | 0.592        | 6.777  |          |          | -0.905         | 6.464  |          |          |                         |     |       |       |    |    |    |   |   |   |   |  |
|               | AAL94451.1   Copper-exporting ATPase                   |        |          |          |            |        |          |          |              |        |          |          |                |        |          |          |              |        |          |          |                |        |          |          |                         |     |       |       |    |    |    |   |   |   |   |  |
| <b>FN0247</b> | -1.109                                                 | 14.471 | 1.669e-2 | 2.132e-2 | -0.290     | 15.475 | 6.662e-8 | 3.15e-9  | -0.127       | 15.249 | 9.125e-2 | 5.071e-1 | 0.982          | 14.343 | 2.788e-2 | 3.415e-2 | 0.819        | 14.365 | 8.486e-2 | 6.112e-2 | 0.163          | 15.347 | 9.41e-2  | 4.493e-1 |                         |     |       |       |    |    |    |   |   |   |   |  |
|               | AAL94453.1   Hypothetical cytosolic protein            |        |          |          |            |        |          |          |              |        |          |          |                |        |          |          |              |        |          |          |                |        |          |          |                         |     |       |       |    |    |    |   |   |   |   |  |
| <b>FN0248</b> |                                                        |        |          |          |            |        |          |          |              |        |          |          | -2.120         | 8.664  |          |          | 0.180        | 11.149 |          |          | -2.300         | 9.029  |          |          |                         |     |       |       |    |    |    |   |   |   |   |  |
|               | AAL94454.1   Hypothetical Exported Protein             |        |          |          |            |        |          |          |              |        |          |          |                |        |          |          |              |        |          |          |                |        |          |          |                         |     |       |       |    |    |    |   |   |   |   |  |
| <b>FN0249</b> | -1.626                                                 | 14.269 | 5.543e-3 | 5.222e-3 | -1.817     | 14.263 | 4.337e-4 | 1.021e-3 | -0.813       | 14.879 | 2.894e-5 | 1.594e-5 | 0.814          | 13.456 | 5.184e-2 | 8.412e-2 | -0.190       | 12.637 | 3.647e-1 | 7.496e-1 | 1.004          | 13.451 | 5.799e-3 | 1.815e-2 |                         |     |       |       |    |    |    |   |   |   |   |  |
|               | AAL94455.1   unknown                                   |        |          |          |            |        |          |          |              |        |          |          |                |        |          |          |              |        |          |          |                |        |          |          |                         |     |       |       |    |    |    |   |   |   |   |  |
| <b>FN0250</b> | -0.589                                                 | 13.778 | 8.361e-2 | 1.803e-1 | -0.996     | 13.556 | 3.358e-3 | 1.293e-2 | 0.063        | 14.226 | 5.06e-2  | 2.621e-1 | 0.652          | 13.840 | 7.563e-2 | 1.439e-1 | -0.406       | 12.967 | 2.74e-1  | 4.926e-1 | 1.058          | 13.619 | 4.575e-3 | 1.338e-2 |                         |     |       |       |    |    |    |   |   |   |   |  |
|               | AAL94456.1   unknown                                   |        |          |          |            |        |          |          |              |        |          |          |                |        |          |          |              |        |          |          |                |        |          |          |                         |     |       |       |    |    |    |   |   |   |   |  |

Show detected proteins only

Show all proteins

Filter by category:

GO: amino acid transport

Proteins found: 1424

Enter (or paste) list of ORFs

Find ORFs

Test

q-Value

p-Value

Cutoff

.005

Dot Plots

Dot Plots

| Signif | Direction | Applies To   |
|--------|-----------|--------------|
| yes    | +         | ratios, bars |
| no     | n/a       | bars         |
| yes    | -         | ratios, bars |
| yes    | +         | p-, q-Values |
| yes    | -         | p-, q-Values |

FnPg vs Fn

FnPgSg vs Fn

FnSg vs FnPg

FnPgSg vs FnSg

FnSg vs Fn

FnPgSg vs FnPg

FnSg vs FnPg

Fn Summary Table

FnPg vs Fn

FnSg vs Fn

FnPgSg vs Fn

FnPgSg vs FnPg

FnSg vs FnPg

FnPgSg vs FnSg

Fn Coverage

| ORF                                                           | FnPg vs Fn    |        |          |          | FnSg vs Fn    |        |          |          | FnPgSg vs Fn  |        |          |          | FnPgSg vs FnPg |        |          |          | FnSg vs FnPg |        |          |          | FnPgSg vs FnSg |        |           |           | Log <sub>2</sub> Ratios |     |       |       |    |    |    |   |   |   |   |  |
|---------------------------------------------------------------|---------------|--------|----------|----------|---------------|--------|----------|----------|---------------|--------|----------|----------|----------------|--------|----------|----------|--------------|--------|----------|----------|----------------|--------|-----------|-----------|-------------------------|-----|-------|-------|----|----|----|---|---|---|---|--|
|                                                               | Ratio         | Sum    | q-Val    | p-Val    | Ratio         | Sum    | q-Val    | p-Val    | Ratio         | Sum    | q-Val    | p-Val    | Ratio          | Sum    | q-Val    | p-Val    | Ratio        | Sum    | q-Val    | p-Val    | Ratio          | Sum    | q-Val     | p-Val     | Ratio                   | Sum | q-Val | p-Val | -6 | -4 | -2 | 0 | 2 | 4 | 6 |  |
| <b>FN0251</b>                                                 | -0.361        | 15.648 | 1.844e-1 | 5.025e-1 | <b>-2.496</b> | 13.698 | 1.488e-4 | 2.659e-4 | -0.104        | 15.702 | 1.066e-1 | 6.041e-1 | 0.257          | 15.544 | 2.138e-1 | 6.518e-1 | -2.135       | 13.336 | 1.251e-1 | 1.297e-1 | <b>2.392</b>   | 13.594 | 2.816e-3  | 7.096e-3  |                         |     |       |       |    |    |    |   |   |   |   |  |
| AAL94457.1   Hypothetical membrane-spanning Protein           |               |        |          |          |               |        |          |          |               |        |          |          |                |        |          |          |              |        |          |          |                |        |           |           |                         |     |       |       |    |    |    |   |   |   |   |  |
| <b>FN0252</b>                                                 | 1.100         | 17.889 | 6.173e-2 | 1.209e-1 | <b>0.575</b>  | 17.548 | 2.44e-4  | 4.894e-4 | <b>-0.338</b> | 16.247 | 1.241e-3 | 3.212e-3 | -1.438         | 17.551 | 5.197e-2 | 8.444e-2 | -0.525       | 18.648 | 1.974e-1 | 3.071e-1 | <b>-0.913</b>  | 17.211 | 3.001e-5  | 1.622e-5  |                         |     |       |       |    |    |    |   |   |   |   |  |
| AAL94458.1   unknown                                          |               |        |          |          |               |        |          |          |               |        |          |          |                |        |          |          |              |        |          |          |                |        |           |           |                         |     |       |       |    |    |    |   |   |   |   |  |
| <b>FN0253</b>                                                 | -0.332        | 15.532 |          |          | 0.460         | 16.509 | 4.768e-2 | 2.649e-1 | 0.155         | 15.816 | 2.243e-2 | 1.027e-1 | 0.488          | 15.687 |          |          | 0.792        | 16.177 |          |          | -0.305         | 16.664 | 8.723e-2  | 4.134e-1  |                         |     |       |       |    |    |    |   |   |   |   |  |
| AAL94459.1   Outer membrane protein                           |               |        |          |          |               |        |          |          |               |        |          |          |                |        |          |          |              |        |          |          |                |        |           |           |                         |     |       |       |    |    |    |   |   |   |   |  |
| <b>FN0254</b>                                                 | <b>-0.864</b> | 19.214 | 3.416e-3 | 2.688e-3 | <b>-1.035</b> | 19.228 | 3.087e-6 | 9.382e-7 | <b>-1.120</b> | 18.754 | 4.687e-4 | 9.187e-4 | -0.256         | 18.094 | 1.078e-1 | 2.488e-1 | -0.171       | 18.364 | 2.091e-1 | 3.337e-1 | -0.085         | 18.108 | 1.214e-1  | 5.977e-1  |                         |     |       |       |    |    |    |   |   |   |   |  |
| AAL94460.1   Fusobacterium outer membrane protein family      |               |        |          |          |               |        |          |          |               |        |          |          |                |        |          |          |              |        |          |          |                |        |           |           |                         |     |       |       |    |    |    |   |   |   |   |  |
| <b>FN0258</b>                                                 | -1.074        | 6.733  | 3.329e-2 | 5.181e-2 | -1.188        | 6.803  |          |          | -1.444        | 6.159  |          |          | -0.370         | 5.289  |          |          | -0.115       | 5.730  |          |          | -0.256         | 5.359  |           |           |                         |     |       |       |    |    |    |   |   |   |   |  |
| AAL94464.1   Zinc-transporting ATPase                         |               |        |          |          |               |        |          |          |               |        |          |          |                |        |          |          |              |        |          |          |                |        |           |           |                         |     |       |       |    |    |    |   |   |   |   |  |
| <b>FN0259</b>                                                 |               |        |          |          |               |        |          |          |               |        |          |          |                |        |          |          |              |        |          |          |                |        |           |           |                         |     |       |       |    |    |    |   |   |   |   |  |
| AAL94465.1   Zinc-transporting ATPase                         |               |        |          |          |               |        |          |          |               |        |          |          |                |        |          |          |              |        |          |          |                |        |           |           |                         |     |       |       |    |    |    |   |   |   |   |  |
| <b>FN0260</b>                                                 |               |        |          |          |               |        |          |          |               |        |          |          |                |        |          |          |              |        |          |          |                |        |           |           |                         |     |       |       |    |    |    |   |   |   |   |  |
| AAL94466.1   Transcriptional repressor smtB                   |               |        |          |          |               |        |          |          |               |        |          |          |                |        |          |          |              |        |          |          |                |        |           |           |                         |     |       |       |    |    |    |   |   |   |   |  |
| <b>FN0261</b>                                                 | -1.252        | 9.331  |          |          | <b>-1.840</b> | 8.927  | 1.912e-5 | 1.542e-5 | <b>-1.556</b> | 8.822  | 3.891e-5 | 2.839e-5 | -0.304         | 7.774  |          |          | -0.588       | 7.675  |          |          | 0.284          | 7.370  | 4.485e-2  | 1.971e-1  |                         |     |       |       |    |    |    |   |   |   |   |  |
| AAL94467.1   Pyruvate formate-lyase activating enzyme         |               |        |          |          |               |        |          |          |               |        |          |          |                |        |          |          |              |        |          |          |                |        |           |           |                         |     |       |       |    |    |    |   |   |   |   |  |
| <b>FN0262</b>                                                 | <b>-1.824</b> | 23.015 | 4.137e-3 | 3.483e-3 | <b>-2.335</b> | 22.689 | 1.237e-5 | 8.314e-6 | <b>-0.198</b> | 24.438 | 9.858e-4 | 2.347e-3 | 1.627          | 22.818 | 9.508e-3 | 6.973e-3 | -0.511       | 20.865 | 2.411e-1 | 4.134e-1 | <b>2.137</b>   | 22.492 | 8.649e-11 | 5.458e-13 |                         |     |       |       |    |    |    |   |   |   |   |  |
| AAL94468.1   Formate acetyltransferase                        |               |        |          |          |               |        |          |          |               |        |          |          |                |        |          |          |              |        |          |          |                |        |           |           |                         |     |       |       |    |    |    |   |   |   |   |  |
| <b>FN0263</b>                                                 | -0.370        | 16.995 | 1.843e-1 | 5.019e-1 | <b>-1.850</b> | 15.700 | 1.178e-5 | 7.68e-6  | <b>-1.266</b> | 15.895 | 2.808e-5 | 1.515e-5 | -0.896         | 15.729 | 1.265e-1 | 3.142e-1 | -1.480       | 15.329 | 1.508e-1 | 1.925e-1 | <b>0.584</b>   | 14.433 | 4.604e-3  | 1.349e-2  |                         |     |       |       |    |    |    |   |   |   |   |  |
| AAL94469.1   Peptidyl-prolyl cis-trans isomerase              |               |        |          |          |               |        |          |          |               |        |          |          |                |        |          |          |              |        |          |          |                |        |           |           |                         |     |       |       |    |    |    |   |   |   |   |  |
| <b>FN0264</b>                                                 | -0.911        | 16.196 | 1.619e-2 | 2.05e-2  | <b>-0.960</b> | 16.331 | 3.951e-3 | 1.586e-2 | <b>-0.264</b> | 16.639 | 2.791e-3 | 9.033e-3 | 0.647          | 15.932 | 4.078e-2 | 5.91e-2  | -0.049       | 15.420 | 4.096e-1 | 9.058e-1 | 0.696          | 16.067 | 1.196e-2  | 4.339e-2  |                         |     |       |       |    |    |    |   |   |   |   |  |
| AAL94470.1   Hypothetical protein                             |               |        |          |          |               |        |          |          |               |        |          |          |                |        |          |          |              |        |          |          |                |        |           |           |                         |     |       |       |    |    |    |   |   |   |   |  |
| <b>FN0265</b>                                                 | -1.308        | 8.227  |          |          | <b>-1.763</b> | 7.956  | 4.807e-4 | 1.165e-3 | -2.080        | 7.250  |          |          | -0.773         | 6.146  |          |          | -0.455       | 6.649  |          |          | -0.318         | 5.876  |           |           |                         |     |       |       |    |    |    |   |   |   |   |  |
| AAL94471.1   Cell division protein ftsX                       |               |        |          |          |               |        |          |          |               |        |          |          |                |        |          |          |              |        |          |          |                |        |           |           |                         |     |       |       |    |    |    |   |   |   |   |  |
| <b>FN0266</b>                                                 | -1.145        | 7.145  |          |          |               |        |          |          | -2.100        | 5.985  |          |          | -0.956         | 5.044  |          |          |              |        |          |          |                |        |           |           |                         |     |       |       |    |    |    |   |   |   |   |  |
| AAL94472.1   membrane protein related to metalloendopeptidase |               |        |          |          |               |        |          |          |               |        |          |          |                |        |          |          |              |        |          |          |                |        |           |           |                         |     |       |       |    |    |    |   |   |   |   |  |
| <b>FN0267</b>                                                 | -0.759        | 5.929  |          |          | -0.436        | 6.436  |          |          |               |        |          |          |                |        |          |          | 0.323        | 5.677  |          |          |                |        |           |           |                         |     |       |       |    |    |    |   |   |   |   |  |
| AAL94473.1   ATP-NAD kinase                                   |               |        |          |          |               |        |          |          |               |        |          |          |                |        |          |          |              |        |          |          |                |        |           |           |                         |     |       |       |    |    |    |   |   |   |   |  |
| <b>FN0268</b>                                                 | -0.137        | 7.964  |          |          | 0.250         | 8.535  |          |          | -2.006        | 5.891  |          |          | -1.869         | 5.958  |          |          | 0.386        | 8.398  |          |          | -2.256         | 6.529  |           |           |                         |     |       |       |    |    |    |   |   |   |   |  |
| AAL94474.1   DNA repair protein recN                          |               |        |          |          |               |        |          |          |               |        |          |          |                |        |          |          |              |        |          |          |                |        |           |           |                         |     |       |       |    |    |    |   |   |   |   |  |
| <b>FN0270</b>                                                 |               |        |          |          | <b>-1.169</b> | 5.872  | 7.405e-4 | 2.059e-3 | <b>-1.136</b> | 5.516  | 2.84e-4  | 4.698e-4 |                |        |          |          |              |        |          |          | 0.033          | 4.735  | 1.521e-1  | 7.763e-1  |                         |     |       |       |    |    |    |   |   |   |   |  |
| AAL94476.1   GTP-binding protein era                          |               |        |          |          |               |        |          |          |               |        |          |          |                |        |          |          |              |        |          |          |                |        |           |           |                         |     |       |       |    |    |    |   |   |   |   |  |
| <b>FN0271</b>                                                 | 0.783         | 6.832  |          |          | 0.093         | 6.327  | 1.263e-1 | 7.684e-1 | -0.923        | 4.923  |          |          | -1.705         | 5.909  |          |          | -0.690       | 7.110  |          |          | -1.016         | 5.404  |           |           |                         |     |       |       |    |    |    |   |   |   |   |  |
| AAL94477.1   Enoyl-CoA hydratase                              |               |        |          |          |               |        |          |          |               |        |          |          |                |        |          |          |              |        |          |          |                |        |           |           |                         |     |       |       |    |    |    |   |   |   |   |  |

Show detected proteins only  
 Show all proteins  
 Filter by category:

Proteins found: 1424

Enter (or paste) list of ORFs

Find ORFs

Test Cutoff

q-Value p-Value

.005

Dot Plots

| Signif | Direction | Applies To   |
|--------|-----------|--------------|
| yes    | +         | ratios, bars |
| no     | n/a       | bars         |
| yes    | -         | ratios, bars |
| yes    | +         | p-, q-Values |
| yes    | -         | p-, q-Values |

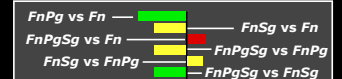

Fn Summary Table FnPg vs Fn FnSg vs Fn FnPgSg vs Fn FnPgSg vs FnPg FnSg vs FnPg FnPgSg vs FnSg Fn Coverage

| ORF           | FnPg vs Fn                                                        |        |          |          | FnSg vs Fn |        |          |          | FnPgSg vs Fn |        |          |          | FnPgSg vs FnPg |        |          |          | FnSg vs FnPg |        |          |          | FnPgSg vs FnSg |        |          |          | Log <sub>2</sub> Ratios |     |       |       |    |    |    |   |   |   |   |  |
|---------------|-------------------------------------------------------------------|--------|----------|----------|------------|--------|----------|----------|--------------|--------|----------|----------|----------------|--------|----------|----------|--------------|--------|----------|----------|----------------|--------|----------|----------|-------------------------|-----|-------|-------|----|----|----|---|---|---|---|--|
|               | Ratio                                                             | Sum    | q-Val    | p-Val    | Ratio      | Sum    | q-Val    | p-Val    | Ratio        | Sum    | q-Val    | p-Val    | Ratio          | Sum    | q-Val    | p-Val    | Ratio        | Sum    | q-Val    | p-Val    | Ratio          | Sum    | q-Val    | p-Val    | Ratio                   | Sum | q-Val | p-Val | -6 | -4 | -2 | 0 | 2 | 4 | 6 |  |
| <b>FN0272</b> | -0.713                                                            | 4.713  |          |          | 0.588      | 6.199  |          |          |              |        |          |          |                |        |          |          | 1.301        | 5.486  |          |          |                |        |          |          |                         |     |       |       |    |    |    |   |   |   |   |  |
|               | AAL94478.1   Acetoacetate:butyrate/acetate coenzyme A transferase |        |          |          |            |        |          |          |              |        |          |          |                |        |          |          |              |        |          |          |                |        |          |          |                         |     |       |       |    |    |    |   |   |   |   |  |
| <b>FN0273</b> |                                                                   |        |          |          |            |        |          |          |              |        |          |          |                |        |          |          | -1.074       | 7.111  |          |          |                |        |          |          |                         |     |       |       |    |    |    |   |   |   |   |  |
|               | AAL94479.1   Butyrate-acetoacetate CoA-transferase subunit B      |        |          |          |            |        |          |          |              |        |          |          |                |        |          |          |              |        |          |          |                |        |          |          |                         |     |       |       |    |    |    |   |   |   |   |  |
| <b>FN0276</b> | 1.319                                                             | 9.021  |          |          | 1.928      | 9.815  |          |          | -1.749       | 5.749  |          |          | -3.068         | 7.272  |          |          | 0.609        | 11.134 |          |          | -3.677         | 8.066  |          |          |                         |     |       |       |    |    |    |   |   |   |   |  |
|               | AAL94482.1   Sodium-dependent phosphate transporter               |        |          |          |            |        |          |          |              |        |          |          |                |        |          |          |              |        |          |          |                |        |          |          |                         |     |       |       |    |    |    |   |   |   |   |  |
| <b>FN0277</b> | -0.304                                                            | 7.393  | 7.804e-2 | 1.644e-1 | -0.494     | 7.388  | 2.194e-2 | 1.134e-1 | -0.579       | 6.914  | 1.193e-2 | 5.032e-2 | -0.275         | 6.814  | 1.447e-2 | 1.332e-2 | -0.190       | 7.083  | 2.604e-2 | 4.596e-1 | -0.085         | 6.808  | 1.476e-1 | 7.491e-1 |                         |     |       |       |    |    |    |   |   |   |   |  |
|               | AAL94483.1   Hypothetical protein                                 |        |          |          |            |        |          |          |              |        |          |          |                |        |          |          |              |        |          |          |                |        |          |          |                         |     |       |       |    |    |    |   |   |   |   |  |
| <b>FN0278</b> | -0.096                                                            | 16.203 | 9.868e-2 | 2.233e-1 | -0.560     | 15.924 | 4.407e-5 | 5.09e-5  | 0.277        | 16.373 | 2.187e-2 | 9.985e-2 | 0.373          | 16.480 | 3.447e-2 | 4.684e-2 | -0.464       | 15.828 | 2.93e-2  | 8.761e-3 | 0.837          | 16.201 | 3.591e-3 | 9.653e-3 |                         |     |       |       |    |    |    |   |   |   |   |  |
|               | AAL94484.1   Xaa-His dipeptidase                                  |        |          |          |            |        |          |          |              |        |          |          |                |        |          |          |              |        |          |          |                |        |          |          |                         |     |       |       |    |    |    |   |   |   |   |  |
| <b>FN0279</b> | 0.946                                                             | 13.128 | 1.364e-1 | 3.36e-1  | 1.561      | 13.927 | 1.692e-4 | 3.134e-4 | -0.558       | 11.420 | 6.44e-6  | 1.66e-6  | -1.504         | 12.570 | 1.006e-1 | 2.215e-1 | 0.615        | 14.873 | 1.932e-1 | 2.964e-1 | -2.119         | 13.369 | 1.953e-4 | 2.115e-4 |                         |     |       |       |    |    |    |   |   |   |   |  |
|               | AAL94485.1   Lipoprotein                                          |        |          |          |            |        |          |          |              |        |          |          |                |        |          |          |              |        |          |          |                |        |          |          |                         |     |       |       |    |    |    |   |   |   |   |  |
| <b>FN0280</b> | -0.987                                                            | 13.362 | 4.062e-2 | 6.736e-2 | -0.787     | 13.745 | 4.364e-5 | 5.015e-5 | -0.804       | 13.341 | 7.714e-6 | 2.203e-6 | 0.183          | 12.558 | 2.323e-1 | 7.252e-1 | 0.199        | 12.759 | 3.492e-1 | 7.006e-1 | -0.017         | 12.941 | 1.276e-1 | 6.33e-1  |                         |     |       |       |    |    |    |   |   |   |   |  |
|               | AAL94486.1   Hypothetical protein                                 |        |          |          |            |        |          |          |              |        |          |          |                |        |          |          |              |        |          |          |                |        |          |          |                         |     |       |       |    |    |    |   |   |   |   |  |
| <b>FN0281</b> | -0.491                                                            | 11.913 | 9.66e-2  | 2.172e-1 | 0.841      | 13.430 | 6.426e-3 | 2.77e-2  | -1.928       | 10.273 | 2.801e-5 | 1.509e-5 | -1.437         | 9.985  | 5.448e-2 | 9.099e-2 | 1.332        | 12.939 | 2.707e-2 | 7.662e-3 | -2.769         | 11.502 | 1.689e-3 | 3.756e-3 |                         |     |       |       |    |    |    |   |   |   |   |  |
|               | AAL94487.1   DNA polymerase III alpha subunit                     |        |          |          |            |        |          |          |              |        |          |          |                |        |          |          |              |        |          |          |                |        |          |          |                         |     |       |       |    |    |    |   |   |   |   |  |
| <b>FN0282</b> | -0.017                                                            | 10.968 | 2.942e-1 | 9.293e-1 | 0.138      | 11.307 | 6.655e-2 | 3.789e-1 | -0.165       | 10.616 | 8.002e-2 | 4.372e-1 | -0.148         | 10.803 | 1.813e-1 | 5.182e-1 | 0.154        | 11.290 | 2.31e-1  | 3.874e-1 | -0.302         | 11.142 | 3.537e-2 | 1.503e-1 |                         |     |       |       |    |    |    |   |   |   |   |  |
|               | AAL94488.1   Hypothetical protein                                 |        |          |          |            |        |          |          |              |        |          |          |                |        |          |          |              |        |          |          |                |        |          |          |                         |     |       |       |    |    |    |   |   |   |   |  |
| <b>FN0283</b> | -1.392                                                            | 8.035  |          |          | -1.636     | 7.976  |          |          | -1.932       | 7.291  |          |          | -0.541         | 6.103  |          |          | -0.244       | 6.584  |          |          | -0.296         | 6.044  |          |          |                         |     |       |       |    |    |    |   |   |   |   |  |
|               | AAL94489.1   tRNA (Guanine-N1) -methyltransferase                 |        |          |          |            |        |          |          |              |        |          |          |                |        |          |          |              |        |          |          |                |        |          |          |                         |     |       |       |    |    |    |   |   |   |   |  |
| <b>FN0284</b> | 1.792                                                             | 9.609  |          |          | 1.667      | 9.668  | 1.303e-3 | 4.103e-3 | 0.337        | 7.950  | 7.893e-2 | 4.305e-1 | -1.455         | 9.946  |          |          | -0.125       | 11.460 |          |          | -1.330         | 10.005 | 2.036e-3 | 4.722e-3 |                         |     |       |       |    |    |    |   |   |   |   |  |
|               | AAL94490.1   16S rRNA processing protein rimM                     |        |          |          |            |        |          |          |              |        |          |          |                |        |          |          |              |        |          |          |                |        |          |          |                         |     |       |       |    |    |    |   |   |   |   |  |
| <b>FN0285</b> | 2.474                                                             | 7.035  |          |          |            |        |          |          | 1.943        | 6.300  |          |          | -0.531         | 8.978  |          |          |              |        |          |          |                |        |          |          |                         |     |       |       |    |    |    |   |   |   |   |  |
|               | AAL94491.1   RNA binding protein                                  |        |          |          |            |        |          |          |              |        |          |          |                |        |          |          |              |        |          |          |                |        |          |          |                         |     |       |       |    |    |    |   |   |   |   |  |
| <b>FN0287</b> | 0.047                                                             | 7.354  |          |          | -0.460     | 7.032  | 2.728e-2 | 1.441e-1 | -0.675       | 6.428  | 2.962e-4 | 4.968e-4 | -0.722         | 6.679  |          |          | -0.507       | 7.079  |          |          | -0.215         | 6.357  | 1.081e-1 | 5.241e-1 |                         |     |       |       |    |    |    |   |   |   |   |  |
|               | AAL94493.1   Dimethyladenosine transferase                        |        |          |          |            |        |          |          |              |        |          |          |                |        |          |          |              |        |          |          |                |        |          |          |                         |     |       |       |    |    |    |   |   |   |   |  |
| <b>FN0288</b> | 0.806                                                             | 10.873 | 8.985e-2 | 1.977e-1 | 0.674      | 10.925 | 4.516e-5 | 5.287e-5 | 0.338        | 10.201 | 3.316e-2 | 1.618e-1 | -0.468         | 11.210 | 1.418e-1 | 3.721e-1 | -0.132       | 11.731 | 3.674e-1 | 7.582e-1 | -0.336         | 11.262 | 2.47e-2  | 1.002e-1 |                         |     |       |       |    |    |    |   |   |   |   |  |
|               | AAL94494.1   Hypoxanthine-guanine phosphoribosyltransferase       |        |          |          |            |        |          |          |              |        |          |          |                |        |          |          |              |        |          |          |                |        |          |          |                         |     |       |       |    |    |    |   |   |   |   |  |
| <b>FN0290</b> |                                                                   |        |          |          |            |        |          |          |              |        |          |          |                |        |          |          |              |        |          |          |                |        |          |          |                         |     |       |       |    |    |    |   |   |   |   |  |
|               | AAL94496.1   Hemolysin                                            |        |          |          |            |        |          |          |              |        |          |          |                |        |          |          |              |        |          |          |                |        |          |          |                         |     |       |       |    |    |    |   |   |   |   |  |
| <b>FN0291</b> | 1.345                                                             | 5.298  |          |          | 0.253      | 4.391  |          |          | 0.270        | 4.019  |          |          | -1.075         | 5.568  |          |          | -1.092       | 5.736  |          |          | 0.017          | 4.661  |          |          |                         |     |       |       |    |    |    |   |   |   |   |  |
|               | AAL94497.1   Hemolysin                                            |        |          |          |            |        |          |          |              |        |          |          |                |        |          |          |              |        |          |          |                |        |          |          |                         |     |       |       |    |    |    |   |   |   |   |  |
| <b>FN0294</b> | -0.806                                                            | 15.296 | 8.268e-3 | 9.034e-3 | -1.901     | 14.385 | 2.457e-5 | 2.192e-5 | -0.403       | 15.495 | 3.238e-4 | 5.605e-4 | 0.403          | 14.893 | 5.492e-2 | 9.217e-2 | -1.095       | 13.579 | 4.651e-2 | 1.98e-2  | 1.498          | 13.983 | 4.768e-4 | 7.007e-4 |                         |     |       |       |    |    |    |   |   |   |   |  |
|               | AAL94500.1   Transketolase subunit A                              |        |          |          |            |        |          |          |              |        |          |          |                |        |          |          |              |        |          |          |                |        |          |          |                         |     |       |       |    |    |    |   |   |   |   |  |

Show detected proteins only  
 Show all proteins  
 Filter by category:

Proteins found: 1424

Test Cutoff

| Signif | Direction | Applies To   |
|--------|-----------|--------------|
| yes    | +         | ratios, bars |
| no     | n/a       | bars         |
| yes    | -         | ratios, bars |
| yes    | +         | p-, q-Values |
| yes    | -         | p-, q-Values |

FnPg vs Fn — █ — FnSg vs Fn

FnPgSg vs Fn — █ — FnPgSg vs FnPg

FnSg vs FnPg — █ — FnPgSg vs FnSg

Fn Summary Table

FnPg vs Fn

FnSg vs Fn

FnPgSg vs FnPg

FnPgSg vs FnPg

FnSg vs FnPg

FnPgSg vs FnSg

Fn Coverage

| ORF                                                                                     | FnPg vs Fn |        |          |          | FnSg vs Fn |        |          |          | FnPgSg vs FnPg |        |          |          | FnPgSg vs FnPg |        |          |          | FnSg vs FnPg |        |          |          | FnPgSg vs FnSg |        |          |          | Log <sub>2</sub> Ratios |     |       |       |    |    |    |   |   |   |   |  |
|-----------------------------------------------------------------------------------------|------------|--------|----------|----------|------------|--------|----------|----------|----------------|--------|----------|----------|----------------|--------|----------|----------|--------------|--------|----------|----------|----------------|--------|----------|----------|-------------------------|-----|-------|-------|----|----|----|---|---|---|---|--|
|                                                                                         | Ratio      | Sum    | q-Val    | p-Val    | Ratio      | Sum    | q-Val    | p-Val    | Ratio          | Sum    | q-Val    | p-Val    | Ratio          | Sum    | q-Val    | p-Val    | Ratio        | Sum    | q-Val    | p-Val    | Ratio          | Sum    | q-Val    | p-Val    | Ratio                   | Sum | q-Val | p-Val | -6 | -4 | -2 | 0 | 2 | 4 | 6 |  |
| <b>FN0295</b><br>AAL94501.1  Transketolase                                              | 0.025      | 14.942 | 2.939e-1 | 9.281e-1 | -0.904     | 14.198 | 1.199e-4 | 1.978e-4 | -0.486         | 14.228 | 1.671e-3 | 4.845e-3 | -0.510         | 14.457 | 8.978e-2 | 1.851e-1 | -0.929       | 14.223 | 9.08e-2  | 7.081e-2 | 0.418          | 13.712 | 3.996e-3 | 1.113e-2 |                         |     |       |       |    |    |    |   |   |   |   |  |
| <b>FN0296</b><br>AAL94502.1  Hypothetical cytosolic protein                             | 0.286      | 11.332 | 1.34e-1  | 3.283e-1 | 0.166      | 11.396 | 6.794e-4 | 1.83e-3  | 0.648          | 11.491 | 2.681e-3 | 8.596e-3 | 0.363          | 11.980 | 8.364e-2 | 1.664e-1 | -0.120       | 11.682 | 3.291e-1 | 6.404e-1 | 0.483          | 12.045 | 5.828e-3 | 1.827e-2 |                         |     |       |       |    |    |    |   |   |   |   |  |
| <b>FN0297</b><br>AAL94503.1  ATPase associated with chromosome architecture/replication | 0.274      | 7.325  | 2.215e-1 | 6.344e-1 | 1.165      | 8.400  | 1.973e-3 | 6.701e-3 | -0.481         | 6.366  |          |          | -0.755         | 6.844  |          |          | 0.890        | 8.674  | 8.369e-2 | 5.936e-2 | -1.646         | 7.919  |          |          |                         |     |       |       |    |    |    |   |   |   |   |  |
| <b>FN0298</b><br>AAL94504.1  Histidyl-tRNA synthetase                                   | 0.398      | 15.651 | 1.757e-1 | 4.697e-1 | 0.466      | 15.903 | 6.287e-4 | 1.652e-3 | -0.036         | 15.012 | 9.846e-2 | 5.526e-1 | -0.434         | 15.615 | 1.604e-1 | 4.385e-1 | 0.068        | 16.301 | 4.025e-1 | 8.796e-1 | -0.502         | 15.867 | 7.901e-8 | 2.493e-9 |                         |     |       |       |    |    |    |   |   |   |   |  |
| <b>FN0299</b><br>AAL94505.1  Aspartyl-tRNA synthetase                                   | -0.529     | 15.954 | 6.556e-2 | 1.311e-1 | -0.265     | 16.401 | 6.204e-4 | 1.623e-3 | -0.090         | 16.188 | 1.752e-2 | 7.775e-2 | 0.439          | 15.864 | 9.365e-2 | 1.976e-1 | 0.263        | 15.873 | 2.449e-1 | 4.227e-1 | 0.175          | 16.311 | 3.052e-3 | 7.844e-3 |                         |     |       |       |    |    |    |   |   |   |   |  |
| <b>FN0305</b><br>AAL94511.1  Iron(III) dicitrate-binding protein                        |            |        |          |          |            |        |          |          | -0.100         | 3.649  |          |          |                |        |          |          |              |        |          |          |                |        |          |          |                         |     |       |       |    |    |    |   |   |   |   |  |
| <b>FN0307</b><br>AAL94513.1  Iron(III) dicitrate transport ATP-binding protein fecE     |            |        |          |          |            |        |          |          |                |        |          |          |                |        |          |          |              |        |          |          |                |        |          |          |                         |     |       |       |    |    |    |   |   |   |   |  |
| <b>FN0308</b><br>AAL94514.1  Iron(III)-binding protein                                  | -0.517     | 16.825 | 1.128e-3 | 5.716e-4 | 0.247      | 17.772 | 2.211e-3 | 7.692e-3 | -0.343         | 16.795 | 1.812e-2 | 8.08e-2  | 0.174          | 16.482 | 1.426e-1 | 3.748e-1 | 0.763        | 17.256 | 1.419e-3 | 6.376e-5 | -0.590         | 17.429 | 3.99e-3  | 1.11e-2  |                         |     |       |       |    |    |    |   |   |   |   |  |
| <b>FN0309</b><br>AAL94515.1  Iron(III)-transport system permease protein sfuB           |            |        |          |          |            |        |          |          | -0.359         | 6.220  |          |          |                |        |          |          |              |        |          |          |                |        |          |          |                         |     |       |       |    |    |    |   |   |   |   |  |
| <b>FN0310</b><br>AAL94516.1  Iron(III)-transport ATP-binding protein sfuC               | -0.888     | 13.719 | 1.399e-2 | 1.701e-2 | -1.748     | 13.044 | 7.401e-6 | 3.645e-6 | -0.601         | 13.803 | 3.806e-3 | 1.311e-2 | 0.287          | 13.118 | 1.467e-1 | 3.896e-1 | -0.860       | 12.155 | 1.081e-1 | 9.826e-2 | 1.147          | 12.443 | 4.279e-3 | 1.222e-2 |                         |     |       |       |    |    |    |   |   |   |   |  |
| <b>FN0311</b><br>AAL94517.1  Anaerobic ribonucleoside-triphosphate reductase            | -0.932     | 13.015 | 1.996e-2 | 2.706e-2 | 0.278      | 14.409 | 2.202e-3 | 7.657e-3 | -0.226         | 13.517 | 1.285e-2 | 5.469e-2 | 0.706          | 12.789 | 4.3e-2   | 6.368e-2 | 1.210        | 13.477 | 2.582e-2 | 7.09e-3  | -0.504         | 14.183 | 8.717e-4 | 1.621e-3 |                         |     |       |       |    |    |    |   |   |   |   |  |
| <b>FN0313</b><br>AAL94519.1  16S rRNA m(5)C 967 methyltransferase                       | -0.943     | 8.558  |          |          | -0.127     | 9.558  | 1.263e-1 | 7.682e-1 | -2.327         | 6.970  |          |          | -1.384         | 6.231  |          |          | 0.816        | 8.615  |          |          | -2.199         | 7.231  |          |          |                         |     |       |       |    |    |    |   |   |   |   |  |
| <b>FN0314</b><br>AAL94520.1  Caffeoyl-CoA O-methyltransferase                           |            |        |          |          |            |        |          |          |                |        |          |          |                |        |          |          | 0.280        | 6.465  |          |          |                |        |          |          |                         |     |       |       |    |    |    |   |   |   |   |  |
| <b>FN0315</b><br>AAL94521.1  Transcriptional regulator, AraC family                     |            |        |          |          |            |        |          |          |                |        |          |          |                |        |          |          | -0.369       | 6.459  |          |          |                |        |          |          |                         |     |       |       |    |    |    |   |   |   |   |  |
| <b>FN0316</b><br>AAL94522.1  Hypothetical protein                                       | -0.584     | 9.667  |          |          | -1.888     | 8.548  | 1.29e-3  | 4.053e-3 | -0.223         | 9.825  | 4.806e-2 | 2.474e-1 | 0.361          | 9.445  |          |          | -1.304       | 7.964  |          |          | 1.665          | 8.325  | 5.114e-4 | 7.712e-4 |                         |     |       |       |    |    |    |   |   |   |   |  |
| <b>FN0317</b><br>AAL94523.1  Tryptophan synthase beta chain                             | 0.441      | 8.024  | 1.622e-1 | 4.21e-1  | 1.397      | 9.164  | 1.666e-6 | 3.453e-7 | -0.857         | 6.522  | 1.105e-2 | 4.61e-2  | -1.298         | 7.167  | 6.799e-2 | 1.241e-1 | 0.956        | 9.605  | 7.221e-2 | 4.392e-2 | -2.254         | 8.308  | 2.366e-4 | 2.776e-4 |                         |     |       |       |    |    |    |   |   |   |   |  |
| <b>FN0319</b><br>AAL94525.1  Citrate (pro-3S)-lyase ligase                              | -0.418     | 6.033  |          |          | -0.061     | 6.574  | 1.346e-1 | 8.262e-1 | -0.766         | 5.481  |          |          | -0.348         | 5.267  |          |          | 0.357        | 6.156  |          |          | -0.705         | 5.808  |          |          |                         |     |       |       |    |    |    |   |   |   |   |  |

Show detected proteins only  
 Show all proteins  
 Filter by category:

Proteins found:  
1424

Enter (or paste) list of ORFs  
Find ORFs

**Test**      **Cutoff**  
     

Dot Plots

| Signif | Direction | Applies To   |
|--------|-----------|--------------|
| yes    | +         | ratios, bars |
| no     | n/a       | bars         |
| yes    | -         | ratios, bars |
| yes    | +         | p-, q-Values |
| yes    | -         | p-, q-Values |

FnPg vs Fn — █ — FnSg vs Fn  
 FnPgSg vs FnPg — █ — FnPgSg vs FnPg  
 FnSg vs FnPg — █ — FnPgSg vs FnSg

Fn Summary Table    FnPg vs Fn    FnSg vs Fn    FnPgSg vs FnPg    FnPgSg vs FnPg    FnSg vs FnPg    FnPgSg vs FnSg    Fn Coverage

| ORF                                                                                    | FnPg vs Fn    |        |          |          | FnSg vs Fn    |        |          |          | FnPgSg vs FnPg |        |          |          | FnPgSg vs FnPg |        |          |          | FnSg vs FnPg |        |          |          | FnPgSg vs FnSg |        |          |          | Log <sub>2</sub> Ratios |       |       |       |    |    |    |   |   |   |   |  |  |  |  |  |  |  |  |  |  |  |  |  |
|----------------------------------------------------------------------------------------|---------------|--------|----------|----------|---------------|--------|----------|----------|----------------|--------|----------|----------|----------------|--------|----------|----------|--------------|--------|----------|----------|----------------|--------|----------|----------|-------------------------|-------|-------|-------|----|----|----|---|---|---|---|--|--|--|--|--|--|--|--|--|--|--|--|--|
|                                                                                        | Ratio         | Sum    | q-Val    | p-Val    | Ratio         | Sum    | q-Val    | p-Val    | Ratio          | Sum    | q-Val    | p-Val    | Ratio          | Sum    | q-Val    | p-Val    | Ratio        | Sum    | q-Val    | p-Val    | Ratio          | Sum    | q-Val    | p-Val    | Ratio                   | Sum   | q-Val | p-Val | -6 | -4 | -2 | 0 | 2 | 4 | 6 |  |  |  |  |  |  |  |  |  |  |  |  |  |
| <b>FN0320</b><br>AAL94526.1   Hypothetical cytosolic protein                           | -0.089        | 9.430  | 1.812e-1 | 4.901e-1 | <b>-1.308</b> | 8.395  | 3.111e-4 | 6.747e-4 | <b>0.484</b>   | 9.799  | 1.113e-5 | 3.673e-6 | 0.573          | 9.914  | 9.886e-3 | 7.411e-3 | -1.219       | 8.306  | 9.754e-3 | 1.653e-3 | <b>1.792</b>   | 8.879  | 1.383e-4 | 1.325e-4 |                         |       |       |       |    |    |    |   |   |   |   |  |  |  |  |  |  |  |  |  |  |  |  |  |
| <b>FN0321</b><br>AAL94527.1   Heat shock protein htpG                                  | 0.268         | 13.895 | 1.544e-1 | 3.944e-1 | <b>0.889</b>  | 14.701 | 4.346e-3 | 1.766e-2 | 0.075          | 13.499 | 8.253e-2 | 4.529e-1 | -0.193         | 13.971 | 1.807e-1 | 5.161e-1 | 0.621        | 14.969 | 8.387e-2 | 5.963e-2 | -0.814         | 14.776 | 6.964e-3 | 2.27e-2  |                         |       |       |       |    |    |    |   |   |   |   |  |  |  |  |  |  |  |  |  |  |  |  |  |
| <b>FN0322</b><br>AAL94528.1   Fructose-bisphosphate aldolase                           | 0.176         | 21.395 | 1.898e-1 | 5.221e-1 | 0.336         | 21.739 | 1.279e-2 | 6.211e-2 | 0.111          | 21.126 | 3.666e-2 | 1.818e-1 | -0.065         | 21.505 | 2.509e-1 | 8.028e-1 | 0.160        | 21.915 | 2.94e-1  | 5.436e-1 | -0.225         | 21.849 | 3.356e-2 | 1.415e-1 |                         |       |       |       |    |    |    |   |   |   |   |  |  |  |  |  |  |  |  |  |  |  |  |  |
| <b>FN0325</b><br>AAL94529.1   LSU ribosomal protein L20P                               | -4.103        | 8.182  |          |          | -4.235        | 8.235  |          |          | <b>1.139</b>   | 13.220 | 2.875e-3 | 9.372e-3 | 5.242          | 9.320  |          |          |              |        |          |          | -0.132         | 4.132  |          |          | 5.373                   | 9.373 |       |       |    |    |    |   |   |   |   |  |  |  |  |  |  |  |  |  |  |  |  |  |
| <b>FN0326</b><br>AAL94530.1   LSU ribosomal protein L35P                               |               |        |          |          |               |        |          |          | 1.302          | 7.274  |          |          |                |        |          |          |              |        |          |          |                |        |          |          |                         |       |       |       |    |    |    |   |   |   |   |  |  |  |  |  |  |  |  |  |  |  |  |  |
| <b>FN0327</b><br>AAL94531.1   Bacterial Protein Translation Initiation Factor 3 (IF-3) | -2.002        | 11.049 |          |          | <b>-1.747</b> | 11.489 | 4.453e-4 | 1.056e-3 | <b>-1.855</b>  | 10.992 | 1.798e-4 | 2.48e-4  | 0.147          | 9.194  |          |          | 0.255        | 9.487  |          |          | -0.108         | 9.634  | 1.507e-1 | 7.677e-1 |                         |       |       |       |    |    |    |   |   |   |   |  |  |  |  |  |  |  |  |  |  |  |  |  |
| <b>FN0329</b><br>AAL94533.1   LSU ribosomal protein L13P                               | -0.359        | 18.255 | 9.469e-2 | 2.116e-1 | <b>-0.950</b> | 17.849 | 1.405e-4 | 2.458e-4 | <b>-0.651</b>  | 17.760 | 3.448e-4 | 6.117e-4 | -0.292         | 17.604 | 1.452e-1 | 3.843e-1 | -0.590       | 17.490 | 1.37e-1  | 1.557e-1 | 0.299          | 17.198 | 7.56e-3  | 2.512e-2 |                         |       |       |       |    |    |    |   |   |   |   |  |  |  |  |  |  |  |  |  |  |  |  |  |
| <b>FN0330</b><br>AAL94534.1   SSU ribosomal protein S9P                                | <b>-1.152</b> | 12.311 | 2.453e-3 | 1.701e-3 | <b>-1.857</b> | 11.791 | 2.129e-4 | 4.128e-4 | <b>0.826</b>   | 14.085 | 1.409e-4 | 1.774e-4 | <b>1.977</b>   | 13.137 | 1.227e-4 | 1.328e-5 | -0.705       | 10.639 | 1.334e-1 | 1.474e-1 | <b>2.682</b>   | 12.617 | 1.481e-5 | 5.583e-6 |                         |       |       |       |    |    |    |   |   |   |   |  |  |  |  |  |  |  |  |  |  |  |  |  |
| <b>FN0331</b><br>AAL94535.1   Hypothetical protein                                     | -1.077        | 11.208 | 3.941e-2 | 6.465e-2 | -0.199        | 12.270 | 2.748e-2 | 1.452e-1 | <b>-0.216</b>  | 11.866 | 1.345e-6 | 2.051e-7 | 0.862          | 10.992 | 6.879e-2 | 1.261e-1 | 0.878        | 11.193 | 1.185e-1 | 1.166e-1 | -0.016         | 12.055 | 1.707e-1 | 8.905e-1 |                         |       |       |       |    |    |    |   |   |   |   |  |  |  |  |  |  |  |  |  |  |  |  |  |
| <b>FN0332</b><br>AAL94536.1   Magnesium and cobalt transport protein corA              |               |        |          |          |               |        |          |          |                |        |          |          | 0.102          | 5.717  |          |          | 0.740        | 6.539  |          |          | -0.638         | 6.641  |          |          |                         |       |       |       |    |    |    |   |   |   |   |  |  |  |  |  |  |  |  |  |  |  |  |  |
| <b>FN0333</b><br>AAL94537.1   Glycerol uptake operon antiterminator regulatory protein |               |        |          |          |               |        |          |          |                |        |          |          |                |        |          |          | -0.137       | 6.047  |          |          |                |        |          |          |                         |       |       |       |    |    |    |   |   |   |   |  |  |  |  |  |  |  |  |  |  |  |  |  |
| <b>FN0334</b><br>AAL94538.1   Aspartate/aromatic aminotransferase                      | -0.173        | 14.224 | 1.787e-1 | 4.807e-1 | <b>0.615</b>  | 15.196 | 1.787e-3 | 5.959e-3 | <b>-0.088</b>  | 14.104 | 2.244e-3 | 6.939e-3 | 0.084          | 14.135 | 2.331e-1 | 7.288e-1 | 0.788        | 15.023 | 3.433e-2 | 1.159e-2 | <b>-0.704</b>  | 15.108 | 2.038e-3 | 4.73e-3  |                         |       |       |       |    |    |    |   |   |   |   |  |  |  |  |  |  |  |  |  |  |  |  |  |
| <b>FN0335</b><br>AAL94539.1   Outer membrane porin F                                   | -0.593        | 20.284 | 5.665e-2 | 1.066e-1 | <b>0.528</b>  | 21.589 | 2.478e-3 | 8.853e-3 | <b>-0.800</b>  | 19.873 | 1.018e-4 | 1.121e-4 | -0.207         | 19.484 | 1.993e-1 | 5.932e-1 | 1.121        | 20.996 | 2.564e-2 | 7.002e-3 | <b>-1.328</b>  | 20.789 | 8.524e-4 | 1.576e-3 |                         |       |       |       |    |    |    |   |   |   |   |  |  |  |  |  |  |  |  |  |  |  |  |  |
| <b>FN0336</b><br>AAL94540.1   Hypothetical protein                                     | -1.726        | 11.635 |          |          | <b>-1.423</b> | 12.122 | 2.481e-4 | 5e-4     | <b>-0.757</b>  | 12.400 | 1.222e-3 | 3.141e-3 | 0.969          | 10.878 |          |          | 0.303        | 10.396 |          |          | 0.666          | 11.366 | 9.5e-3   | 3.294e-2 |                         |       |       |       |    |    |    |   |   |   |   |  |  |  |  |  |  |  |  |  |  |  |  |  |
| <b>FN0341</b><br>AAL94545.1   transport protein                                        | -0.776        | 11.420 |          |          | <b>-2.957</b> | 9.423  | 2.092e-4 | 4.04e-4  | <b>0.452</b>   | 12.443 | 1.446e-3 | 4.002e-3 | 1.228          | 11.871 |          |          | -2.181       | 8.648  |          |          | <b>3.408</b>   | 9.875  | 2.655e-6 | 4.131e-7 |                         |       |       |       |    |    |    |   |   |   |   |  |  |  |  |  |  |  |  |  |  |  |  |  |
| <b>FN0342</b><br>AAL94546.1   Peptidyl-prolyl cis-trans isomerase                      | -0.221        | 10.720 | 2.038e-1 | 5.707e-1 | -0.833        | 10.292 | 1.718e-2 | 8.673e-2 | 0.166          | 10.903 | 8.716e-2 | 4.817e-1 | 0.387          | 10.885 | 1.069e-1 | 2.45e-1  | -0.612       | 10.071 | 1.795e-1 | 2.61e-1  | 0.999          | 10.458 | 9.333e-3 | 3.225e-2 |                         |       |       |       |    |    |    |   |   |   |   |  |  |  |  |  |  |  |  |  |  |  |  |  |
| <b>FN0343</b><br>AAL94547.1   Hypothetical protein                                     |               |        |          |          |               |        |          |          |                |        |          |          |                |        |          |          |              |        |          |          |                |        |          |          |                         |       |       |       |    |    |    |   |   |   |   |  |  |  |  |  |  |  |  |  |  |  |  |  |

Show detected proteins only  
 Show all proteins  
 Filter by category:

Proteins found: 1424

Test      Cutoff

| Signif | Direction | Applies To   |
|--------|-----------|--------------|
| yes    | +         | ratios, bars |
| no     | n/a       | bars         |
| yes    | -         | ratios, bars |
| yes    | +         | p-, q-Values |
| yes    | -         | p-, q-Values |

FnPg vs Fn — █ — FnSg vs Fn

FnPgSg vs FnPg — █ — FnPgSg vs FnPg

FnSg vs FnPg — █ — FnPgSg vs FnSg

Fn Summary Table

FnPg vs Fn

FnSg vs Fn

FnPgSg vs Fn

FnPgSg vs FnPg

FnSg vs FnPg

FnPgSg vs FnSg

Fn Coverage

| ORF           | FnPg vs Fn                                                   |        |          |          | FnSg vs Fn |        |          |          | FnPgSg vs Fn |        |          |          | FnPgSg vs FnPg |        |          |          | FnSg vs FnPg |        |          |          | FnPgSg vs FnSg |        |          |          | Log <sub>2</sub> Ratios |     |       |       |    |    |    |   |   |   |   |  |
|---------------|--------------------------------------------------------------|--------|----------|----------|------------|--------|----------|----------|--------------|--------|----------|----------|----------------|--------|----------|----------|--------------|--------|----------|----------|----------------|--------|----------|----------|-------------------------|-----|-------|-------|----|----|----|---|---|---|---|--|
|               | Ratio                                                        | Sum    | q-Val    | p-Val    | Ratio      | Sum    | q-Val    | p-Val    | Ratio        | Sum    | q-Val    | p-Val    | Ratio          | Sum    | q-Val    | p-Val    | Ratio        | Sum    | q-Val    | p-Val    | Ratio          | Sum    | q-Val    | p-Val    | Ratio                   | Sum | q-Val | p-Val | -6 | -4 | -2 | 0 | 2 | 4 | 6 |  |
| <b>FN0344</b> |                                                              |        |          |          | -2.069     | 5.239  |          |          |              |        |          |          |                |        |          |          |              |        |          |          |                |        |          |          |                         |     |       |       |    |    |    |   |   |   |   |  |
|               | AAL94548.1   Methyltransferase                               |        |          |          |            |        |          |          |              |        |          |          |                |        |          |          |              |        |          |          |                |        |          |          |                         |     |       |       |    |    |    |   |   |   |   |  |
| <b>FN0347</b> | -1.193                                                       | 12.183 | 1.878e-2 | 2.499e-2 | -0.674     | 12.887 | 4.826e-4 | 1.171e-3 | -1.941       | 11.232 | 2.077e-4 | 3.076e-4 | -0.747         | 10.242 | 1.255e-1 | 3.104e-1 | 0.519        | 11.693 | 1.886e-1 | 2.841e-1 | -1.266         | 10.946 | 1.861e-4 | 1.979e-4 |                         |     |       |       |    |    |    |   |   |   |   |  |
|               | AAL94551.1   Phosphatidylserine decarboxylase                |        |          |          |            |        |          |          |              |        |          |          |                |        |          |          |              |        |          |          |                |        |          |          |                         |     |       |       |    |    |    |   |   |   |   |  |
| <b>FN0348</b> | -0.459                                                       | 16.128 | 5.352e-2 | 9.837e-2 | -0.391     | 16.381 | 1.208e-2 | 5.806e-2 | -0.598       | 15.785 | 1.01e-3  | 2.422e-3 | -0.139         | 15.529 | 2.036e-1 | 6.118e-1 | 0.069        | 15.922 | 3.841e-1 | 8.143e-1 | -0.208         | 15.783 | 6.699e-2 | 3.091e-1 |                         |     |       |       |    |    |    |   |   |   |   |  |
|               | AAL94552.1   Nicotinate phosphoribosyltransferase            |        |          |          |            |        |          |          |              |        |          |          |                |        |          |          |              |        |          |          |                |        |          |          |                         |     |       |       |    |    |    |   |   |   |   |  |
| <b>FN0349</b> | 1.092                                                        | 7.766  | 3.465e-2 | 5.461e-2 | 1.812      | 8.670  | 3.665e-3 | 1.446e-2 | 0.087        | 6.557  |          |          | -1.005         | 7.853  |          |          | 0.720        | 9.762  | 9.009e-2 | 6.962e-2 | -1.725         | 8.757  |          |          |                         |     |       |       |    |    |    |   |   |   |   |  |
|               | AAL94553.1   D-Tyr-tRNA <sup>Tyr</sup> deacylase             |        |          |          |            |        |          |          |              |        |          |          |                |        |          |          |              |        |          |          |                |        |          |          |                         |     |       |       |    |    |    |   |   |   |   |  |
| <b>FN0351</b> | -0.512                                                       | 14.137 | 1.493e-1 | 3.774e-1 | -2.482     | 12.351 | 3.184e-4 | 6.951e-4 | -0.271       | 14.174 | 1.764e-2 | 7.835e-2 | 0.241          | 13.866 | 2.225e-1 | 6.861e-1 | -1.971       | 11.839 | 1.408e-1 | 1.652e-1 | 2.212          | 12.080 | 7.791e-6 | 1.885e-6 |                         |     |       |       |    |    |    |   |   |   |   |  |
|               | AAL94555.1   unknown                                         |        |          |          |            |        |          |          |              |        |          |          |                |        |          |          |              |        |          |          |                |        |          |          |                         |     |       |       |    |    |    |   |   |   |   |  |
| <b>FN0352</b> | 0.044                                                        | 11.266 | 2.911e-1 | 9.157e-1 | -0.286     | 11.121 | 3.59e-2  | 1.95e-1  | -0.787       | 10.231 | 4.061e-3 | 1.419e-2 | -0.831         | 10.479 | 8.637e-2 | 1.745e-1 | -0.330       | 11.164 | 2.681e-1 | 4.782e-1 | -0.501         | 10.333 | 1.264e-2 | 4.63e-2  |                         |     |       |       |    |    |    |   |   |   |   |  |
|               | AAL94556.1   NA+/H+ antiporter NHAC                          |        |          |          |            |        |          |          |              |        |          |          |                |        |          |          |              |        |          |          |                |        |          |          |                         |     |       |       |    |    |    |   |   |   |   |  |
| <b>FN0355</b> | -0.213                                                       | 15.127 | 1.534e-1 | 3.911e-1 | -0.041     | 15.483 | 1.287e-1 | 7.85e-1  | -0.606       | 14.529 | 2.716e-4 | 4.432e-4 | -0.394         | 14.520 | 1.029e-1 | 2.298e-1 | 0.172        | 15.270 | 2.916e-1 | 5.374e-1 | -0.566         | 14.877 | 1.074e-2 | 3.819e-2 |                         |     |       |       |    |    |    |   |   |   |   |  |
|               | AAL94558.1   S-adenosylmethionine synthetase                 |        |          |          |            |        |          |          |              |        |          |          |                |        |          |          |              |        |          |          |                |        |          |          |                         |     |       |       |    |    |    |   |   |   |   |  |
| <b>FN0356</b> | -0.716                                                       | 10.040 | 4.226e-2 | 7.109e-2 | -2.283     | 8.658  |          |          | -1.801       | 8.752  | 2.524e-7 | 1.913e-8 | -1.084         | 8.239  | 6.211e-2 | 1.098e-1 | -1.566       | 7.942  |          |          | 0.482          | 6.858  |          |          |                         |     |       |       |    |    |    |   |   |   |   |  |
|               | AAL94559.1   Lactoylglutathione lyase                        |        |          |          |            |        |          |          |              |        |          |          |                |        |          |          |              |        |          |          |                |        |          |          |                         |     |       |       |    |    |    |   |   |   |   |  |
| <b>FN0357</b> | -0.326                                                       | 7.596  | 1.831e-1 | 4.972e-1 | -0.449     | 7.657  | 4.661e-2 | 2.584e-1 | -0.138       | 7.580  | 1.187e-1 | 6.818e-1 | 0.188          | 7.458  | 2.124e-1 | 6.466e-1 | -0.124       | 7.331  | 3.745e-1 | 7.816e-1 | 0.311          | 7.519  | 4.074e-2 | 1.768e-1 |                         |     |       |       |    |    |    |   |   |   |   |  |
|               | AAL94560.1   ATP synthase epsilon chain, sodium ion specific |        |          |          |            |        |          |          |              |        |          |          |                |        |          |          |              |        |          |          |                |        |          |          |                         |     |       |       |    |    |    |   |   |   |   |  |
| <b>FN0358</b> | -0.929                                                       | 17.355 | 1.835e-7 | 2.97e-9  | -0.347     | 18.121 | 1.156e-2 | 5.518e-2 | -0.992       | 17.088 | 2.477e-7 | 1.823e-8 | -0.063         | 16.363 | 2.578e-2 | 3.046e-2 | 0.581        | 17.192 | 6.231e-2 | 3.35e-2  | -0.644         | 17.129 | 8.106e-3 | 2.734e-2 |                         |     |       |       |    |    |    |   |   |   |   |  |
|               | AAL94561.1   ATP synthase beta chain, sodium ion specific    |        |          |          |            |        |          |          |              |        |          |          |                |        |          |          |              |        |          |          |                |        |          |          |                         |     |       |       |    |    |    |   |   |   |   |  |
| <b>FN0359</b> | -0.634                                                       | 11.962 | 2.378e-2 | 3.367e-2 | -0.269     | 12.511 | 2.135e-3 | 7.37e-3  | -0.584       | 11.809 | 1.868e-4 | 2.623e-4 | 0.050          | 11.378 | 2.594e-1 | 8.397e-1 | 0.365        | 11.877 | 1.394e-1 | 1.615e-1 | -0.314         | 11.927 | 4.047e-3 | 1.132e-2 |                         |     |       |       |    |    |    |   |   |   |   |  |
|               | AAL94562.1   ATP synthase gamma chain, sodium ion specific   |        |          |          |            |        |          |          |              |        |          |          |                |        |          |          |              |        |          |          |                |        |          |          |                         |     |       |       |    |    |    |   |   |   |   |  |
| <b>FN0360</b> | 0.202                                                        | 13.804 | 2.111e-3 | 1.401e-3 | 0.487      | 14.273 | 2.811e-3 | 1.034e-2 | 0.041        | 13.439 | 8.798e-2 | 4.868e-1 | -0.161         | 13.845 | 2.234e-2 | 2.484e-2 | 0.285        | 14.476 | 7.053e-2 | 4.199e-2 | -0.446         | 14.314 | 3.751e-3 | 1.022e-2 |                         |     |       |       |    |    |    |   |   |   |   |  |
|               | AAL94563.1   ATP synthase alpha chain, sodium ion specific   |        |          |          |            |        |          |          |              |        |          |          |                |        |          |          |              |        |          |          |                |        |          |          |                         |     |       |       |    |    |    |   |   |   |   |  |
| <b>FN0361</b> | -0.808                                                       | 10.031 | 2.108e-2 | 2.895e-2 | -0.759     | 10.265 | 9.707e-3 | 4.517e-2 | -0.550       | 10.085 | 2.28e-4  | 3.525e-4 | 0.258          | 9.481  | 1.512e-1 | 4.057e-1 | 0.049        | 9.456  | 4.111e-1 | 9.113e-1 | 0.209          | 9.714  | 1.088e-1 | 5.281e-1 |                         |     |       |       |    |    |    |   |   |   |   |  |
|               | AAL94564.1   ATP synthase delta chain, sodium ion specific   |        |          |          |            |        |          |          |              |        |          |          |                |        |          |          |              |        |          |          |                |        |          |          |                         |     |       |       |    |    |    |   |   |   |   |  |
| <b>FN0362</b> | -0.554                                                       | 10.462 |          |          | -0.065     | 11.135 | 1.364e-1 | 8.393e-1 | -0.536       | 10.276 | 3.621e-2 | 1.792e-1 | 0.017          | 9.926  |          |          | 0.489        | 10.582 |          |          | -0.471         | 10.599 | 2.038e-2 | 8.06e-2  |                         |     |       |       |    |    |    |   |   |   |   |  |
|               | AAL94565.1   ATP synthase B chain, sodium ion specific       |        |          |          |            |        |          |          |              |        |          |          |                |        |          |          |              |        |          |          |                |        |          |          |                         |     |       |       |    |    |    |   |   |   |   |  |
| <b>FN0364</b> | 1.724                                                        | 5.677  |          |          |            |        |          |          | 1.071        | 4.820  |          |          | -0.653         | 6.748  |          |          |              |        |          |          |                |        |          |          |                         |     |       |       |    |    |    |   |   |   |   |  |
|               | AAL94567.1   ATP synthase A chain, sodium ion specific       |        |          |          |            |        |          |          |              |        |          |          |                |        |          |          |              |        |          |          |                |        |          |          |                         |     |       |       |    |    |    |   |   |   |   |  |
| <b>FN0366</b> | -0.510                                                       | 15.695 | 5.096e-3 | 4.671e-3 | -0.416     | 15.974 | 6.335e-3 | 2.724e-2 | 0.100        | 16.101 | 4.609e-2 | 2.361e-1 | 0.610          | 15.795 | 2.972e-3 | 1.209e-3 | 0.094        | 15.463 | 2.964e-1 | 5.5e-1   | 0.516          | 16.073 | 2.89e-3  | 7.328e-3 |                         |     |       |       |    |    |    |   |   |   |   |  |
|               | AAL94569.1   Phosphoglucosamine mutase                       |        |          |          |            |        |          |          |              |        |          |          |                |        |          |          |              |        |          |          |                |        |          |          |                         |     |       |       |    |    |    |   |   |   |   |  |
| <b>FN0368</b> | 0.324                                                        | 13.237 | 1.183e-1 | 2.803e-1 | -0.530     | 12.567 | 2.842e-3 | 1.048e-2 | 0.078        | 12.788 | 7.982e-2 | 4.36e-1  | -0.245         | 13.315 | 1.467e-1 | 3.897e-1 | -0.854       | 12.891 | 8.103e-2 | 5.551e-2 | 0.609          | 12.646 | 2.347e-3 | 5.658e-3 |                         |     |       |       |    |    |    |   |   |   |   |  |
|               | AAL94571.1   Adenylosuccinate lyase                          |        |          |          |            |        |          |          |              |        |          |          |                |        |          |          |              |        |          |          |                |        |          |          |                         |     |       |       |    |    |    |   |   |   |   |  |

Show detected proteins only  
 Show all proteins  
 Filter by category:

Proteins found: 1424

Enter (or paste) list of ORFs

Find ORFs

Test Cutoff

q-Value .005

p-Value

Dot Plots

| Signif | Direction | Applies To   |
|--------|-----------|--------------|
| yes    | +         | ratios, bars |
| no     | n/a       | bars         |
| yes    | -         | ratios, bars |
| yes    | +         | p-, q-Values |
| yes    | -         | p-, q-Values |

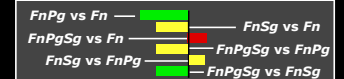

Fn Summary Table

FnPg vs Fn

FnSg vs Fn

FnPgSg vs Fn

FnPgSg vs FnPg

FnSg vs FnPg

FnPgSg vs FnSg

Fn Coverage

| ORF           | FnPg vs Fn                                                      |        |          |          | FnSg vs Fn |        |          |          | FnPgSg vs Fn |        |          |          | FnPgSg vs FnPg |        |          |          | FnSg vs FnPg |        |          |          | FnPgSg vs FnSg |        |          |          | Log <sub>2</sub> Ratios |     |       |       |    |    |    |   |   |   |   |  |
|---------------|-----------------------------------------------------------------|--------|----------|----------|------------|--------|----------|----------|--------------|--------|----------|----------|----------------|--------|----------|----------|--------------|--------|----------|----------|----------------|--------|----------|----------|-------------------------|-----|-------|-------|----|----|----|---|---|---|---|--|
|               | Ratio                                                           | Sum    | q-Val    | p-Val    | Ratio      | Sum    | q-Val    | p-Val    | Ratio        | Sum    | q-Val    | p-Val    | Ratio          | Sum    | q-Val    | p-Val    | Ratio        | Sum    | q-Val    | p-Val    | Ratio          | Sum    | q-Val    | p-Val    | Ratio                   | Sum | q-Val | p-Val | -6 | -4 | -2 | 0 | 2 | 4 | 6 |  |
| <b>FN0370</b> | -0.675                                                          | 10.059 | 6.105e-2 | 1.189e-1 | -0.772     | 10.147 | 5.368e-3 | 2.244e-2 | -1.004       | 9.526  | 2.752e-3 | 8.88e-3  | -0.329         | 9.055  | 1.841e-1 | 5.298e-1 | -0.097       | 9.472  | 3.919e-1 | 8.415e-1 | -0.233         | 9.143  | 1.014e-1 | 4.882e-1 |                         |     |       |       |    |    |    |   |   |   |   |  |
|               | AAL94573.1   Signal peptidase I                                 |        |          |          |            |        |          |          |              |        |          |          |                |        |          |          |              |        |          |          |                |        |          |          |                         |     |       |       |    |    |    |   |   |   |   |  |
| <b>FN0371</b> | -1.635                                                          | 11.082 | 9.831e-3 | 1.113e-2 | -2.901     | 10.001 |          |          | 0.167        | 12.681 | 6.273e-2 | 3.331e-1 | 1.802          | 11.250 | 5.343e-3 | 2.773e-3 | -1.266       | 8.366  |          |          | 3.068          | 10.169 |          |          |                         |     |       |       |    |    |    |   |   |   |   |  |
|               | AAL94574.1   Hypothetical protein                               |        |          |          |            |        |          |          |              |        |          |          |                |        |          |          |              |        |          |          |                |        |          |          |                         |     |       |       |    |    |    |   |   |   |   |  |
| <b>FN0374</b> | 1.120                                                           | 5.425  | 2.593e-2 | 3.754e-2 | 2.077      | 6.567  |          |          |              |        |          |          |                |        |          |          | 0.957        | 7.687  |          |          |                |        |          |          |                         |     |       |       |    |    |    |   |   |   |   |  |
|               | AAL94577.1   Single-stranded-DNA-specific exonuclease recJ      |        |          |          |            |        |          |          |              |        |          |          |                |        |          |          |              |        |          |          |                |        |          |          |                         |     |       |       |    |    |    |   |   |   |   |  |
| <b>FN0375</b> | 0.509                                                           | 17.587 | 7.141e-3 | 7.429e-3 | 1.101      | 18.363 | 1.719e-3 | 5.694e-3 | 0.529        | 17.403 | 1.105e-3 | 2.734e-3 | 0.020          | 18.116 | 2.581e-1 | 8.339e-1 | 0.592        | 18.873 | 3.983e-2 | 1.494e-2 | -0.572         | 18.893 | 5.766e-3 | 1.801e-2 |                         |     |       |       |    |    |    |   |   |   |   |  |
|               | AAL94578.1   Iron(III)-binding protein                          |        |          |          |            |        |          |          |              |        |          |          |                |        |          |          |              |        |          |          |                |        |          |          |                         |     |       |       |    |    |    |   |   |   |   |  |
| <b>FN0376</b> | 0.466                                                           | 12.667 | 1.783e-2 | 2.329e-2 | 1.150      | 13.536 | 3.241e-4 | 7.114e-4 | -0.708       | 11.289 | 6.328e-5 | 5.649e-5 | -1.174         | 11.959 | 4.776e-3 | 2.368e-3 | 0.684        | 14.002 | 6.587e-3 | 8.96e-4  | -1.858         | 12.828 | 2.183e-4 | 2.474e-4 |                         |     |       |       |    |    |    |   |   |   |   |  |
|               | AAL94579.1   Iron(III)-transport ATP-binding protein sfuC       |        |          |          |            |        |          |          |              |        |          |          |                |        |          |          |              |        |          |          |                |        |          |          |                         |     |       |       |    |    |    |   |   |   |   |  |
| <b>FN0377</b> |                                                                 |        |          |          | -1.332     | 5.976  |          |          | 1.124        | 8.044  |          |          |                |        |          |          |              |        |          |          | 2.456          | 7.100  |          |          |                         |     |       |       |    |    |    |   |   |   |   |  |
|               | AAL94580.1   Iron(III)-transport system permease protein sfuB   |        |          |          |            |        |          |          |              |        |          |          |                |        |          |          |              |        |          |          |                |        |          |          |                         |     |       |       |    |    |    |   |   |   |   |  |
| <b>FN0378</b> |                                                                 |        |          |          | -0.339     | 6.134  | 7.115e-2 | 4.071e-1 | 0.286        | 6.371  | 8.949e-2 | 4.962e-1 |                |        |          |          |              |        |          |          | 0.625          | 6.421  | 6.098e-2 | 2.782e-1 |                         |     |       |       |    |    |    |   |   |   |   |  |
|               | AAL94581.1   UDP-glucose 4-epimerase                            |        |          |          |            |        |          |          |              |        |          |          |                |        |          |          |              |        |          |          |                |        |          |          |                         |     |       |       |    |    |    |   |   |   |   |  |
| <b>FN0379</b> | -0.651                                                          | 6.644  | 4.499e-2 | 7.757e-2 | -1.155     | 6.325  |          |          | -0.107       | 6.985  | 1.231e-1 | 7.105e-1 | 0.544          | 6.537  | 9.755e-2 | 2.107e-1 | -0.504       | 5.674  |          |          | 1.048          | 6.218  |          |          |                         |     |       |       |    |    |    |   |   |   |   |  |
|               | AAL94582.1   Hypothetical protein                               |        |          |          |            |        |          |          |              |        |          |          |                |        |          |          |              |        |          |          |                |        |          |          |                         |     |       |       |    |    |    |   |   |   |   |  |
| <b>FN0380</b> | -2.167                                                          | 7.337  |          |          |            |        |          |          | -1.707       | 7.592  |          |          | 0.459          | 5.629  |          |          |              |        |          |          |                |        |          |          |                         |     |       |       |    |    |    |   |   |   |   |  |
|               | AAL94583.1   unknown                                            |        |          |          |            |        |          |          |              |        |          |          |                |        |          |          |              |        |          |          |                |        |          |          |                         |     |       |       |    |    |    |   |   |   |   |  |
| <b>FN0381</b> |                                                                 |        |          |          |            |        |          |          | 0.286        | 8.570  | 4.251e-3 | 1.502e-2 |                |        |          |          |              |        |          |          |                |        |          |          |                         |     |       |       |    |    |    |   |   |   |   |  |
|               | AAL94584.1   unknown                                            |        |          |          |            |        |          |          |              |        |          |          |                |        |          |          |              |        |          |          |                |        |          |          |                         |     |       |       |    |    |    |   |   |   |   |  |
| <b>FN0382</b> |                                                                 |        |          |          |            |        |          |          |              |        |          |          |                |        |          |          |              |        |          |          |                |        |          |          |                         |     |       |       |    |    |    |   |   |   |   |  |
|               | AAL94585.1   Hypothetical protein                               |        |          |          |            |        |          |          |              |        |          |          |                |        |          |          |              |        |          |          |                |        |          |          |                         |     |       |       |    |    |    |   |   |   |   |  |
| <b>FN0383</b> |                                                                 |        |          |          |            |        |          |          |              |        |          |          |                |        |          |          |              |        |          |          |                |        |          |          |                         |     |       |       |    |    |    |   |   |   |   |  |
|               | AAL94586.1   Lipopolysaccharide N-acetylglucosaminyltransferase |        |          |          |            |        |          |          |              |        |          |          |                |        |          |          |              |        |          |          |                |        |          |          |                         |     |       |       |    |    |    |   |   |   |   |  |
| <b>FN0384</b> | -3.389                                                          | 7.467  |          |          | -3.317     | 7.723  | 2.241e-4 | 4.398e-4 | -1.709       | 8.942  | 4.412e-4 | 8.5e-4   | 1.679          | 5.758  |          |          | 0.071        | 4.334  |          |          | 1.608          | 6.013  | 2.007e-5 | 9.367e-6 |                         |     |       |       |    |    |    |   |   |   |   |  |
|               | AAL94587.1   Hypothetical protein                               |        |          |          |            |        |          |          |              |        |          |          |                |        |          |          |              |        |          |          |                |        |          |          |                         |     |       |       |    |    |    |   |   |   |   |  |
| <b>FN0385</b> |                                                                 |        |          |          |            |        |          |          |              |        |          |          |                |        |          |          |              |        |          |          |                |        |          |          |                         |     |       |       |    |    |    |   |   |   |   |  |
|               | AAL94588.1   Hypothetical protein                               |        |          |          |            |        |          |          |              |        |          |          |                |        |          |          |              |        |          |          |                |        |          |          |                         |     |       |       |    |    |    |   |   |   |   |  |
| <b>FN0386</b> |                                                                 |        |          |          |            |        |          |          |              |        |          |          |                |        |          |          |              |        |          |          |                |        |          |          |                         |     |       |       |    |    |    |   |   |   |   |  |
|               | AAL94589.1   Hypothetical protein                               |        |          |          |            |        |          |          |              |        |          |          |                |        |          |          |              |        |          |          |                |        |          |          |                         |     |       |       |    |    |    |   |   |   |   |  |
| <b>FN0387</b> | -2.777                                                          | 11.772 | 7.82e-5  | 9.377e-6 | -2.598     | 12.135 | 2.352e-4 | 4.672e-4 | -1.823       | 12.522 | 3.938e-5 | 2.918e-5 | 0.954          | 9.949  | 9.124e-4 | 2.082e-4 | 0.178        | 9.358  | 3.829e-1 | 8.102e-1 | 0.776          | 10.312 | 4.616e-2 | 2.036e-1 |                         |     |       |       |    |    |    |   |   |   |   |  |
|               | AAL94590.1   Fusobacterium outer membrane protein family        |        |          |          |            |        |          |          |              |        |          |          |                |        |          |          |              |        |          |          |                |        |          |          |                         |     |       |       |    |    |    |   |   |   |   |  |
| <b>FN0390</b> | 1.070                                                           | 11.829 | 5.147e-2 | 9.318e-2 | 0.760      | 11.704 | 2.097e-3 | 7.21e-3  | 1.213        | 11.769 | 2.133e-3 | 6.538e-3 | 0.143          | 13.042 | 2.207e-1 | 6.789e-1 | -0.310       | 12.774 | 2.522e-1 | 4.404e-1 | 0.453          | 12.917 | 1.121e-2 | 4.025e-2 |                         |     |       |       |    |    |    |   |   |   |   |  |
|               | AAL94593.1   Hypothetical protein                               |        |          |          |            |        |          |          |              |        |          |          |                |        |          |          |              |        |          |          |                |        |          |          |                         |     |       |       |    |    |    |   |   |   |   |  |

Show detected proteins only

Show all proteins

Filter by category:

GO: amino acid transport

Proteins found: 1424

Enter (or paste) list of ORFs

Find ORFs

Test Cutoff

q-Value .005

p-Value

Dot Plots

Dot Plots

| Signif | Direction | Applies To   |
|--------|-----------|--------------|
| yes    | +         | ratios, bars |
| no     | n/a       | bars         |
| yes    | -         | ratios, bars |
| yes    | +         | p-, q-Values |
| yes    | -         | p-, q-Values |

FnPg vs Fn

FnPgSg vs Fn

FnSg vs FnPg

FnPgSg vs FnSg

FnSg vs Fn

FnPgSg vs FnPg

FnPgSg vs FnSg

Fn Summary Table FnPg vs Fn FnSg vs Fn FnPgSg vs Fn FnPgSg vs FnPg FnSg vs FnPg FnPgSg vs FnSg Fn Coverage

| ORF                                                                           | FnPg vs Fn    |               |                 |                 | FnSg vs Fn    |        |          |          | FnPgSg vs Fn  |        |          |          | FnPgSg vs FnPg |        |          |          | FnSg vs FnPg |        |          |          | FnPgSg vs FnSg |        |          |          | Log <sub>2</sub> Ratios |     |       |       |    |    |    |   |   |   |   |  |
|-------------------------------------------------------------------------------|---------------|---------------|-----------------|-----------------|---------------|--------|----------|----------|---------------|--------|----------|----------|----------------|--------|----------|----------|--------------|--------|----------|----------|----------------|--------|----------|----------|-------------------------|-----|-------|-------|----|----|----|---|---|---|---|--|
|                                                                               | Ratio         | Sum           | q-Val           | p-Val           | Ratio         | Sum    | q-Val    | p-Val    | Ratio         | Sum    | q-Val    | p-Val    | Ratio          | Sum    | q-Val    | p-Val    | Ratio        | Sum    | q-Val    | p-Val    | Ratio          | Sum    | q-Val    | p-Val    | Ratio                   | Sum | q-Val | p-Val | -6 | -4 | -2 | 0 | 2 | 4 | 6 |  |
| <b>FN0391</b>                                                                 | 0.598         | 9.079         | 1.75e-1         | 4.7e-1          | <b>0.573</b>  | 9.238  | 6.047e-5 | 7.95e-5  | -0.312        | 7.965  | 2.99e-3  | 9.845e-3 | -0.910         | 8.767  | 1.328e-1 | 3.384e-1 | -0.025       | 9.836  | 4.26e-1  | 9.689e-1 | <b>-0.885</b>  | 8.926  | 3.102e-4 | 4.034e-4 |                         |     |       |       |    |    |    |   |   |   |   |  |
| AAL94594.1   Hydrolase (HAD superfamily)                                      |               |               |                 |                 |               |        |          |          |               |        |          |          |                |        |          |          |              |        |          |          |                |        |          |          |                         |     |       |       |    |    |    |   |   |   |   |  |
| <b>FN0392</b>                                                                 | -1.819        | 6.462         |                 |                 | <b>-1.839</b> | 6.626  | 3.636e-5 | 3.78e-5  | <b>-1.162</b> | 6.915  | 6.901e-6 | 1.857e-6 | 0.656          | 5.300  |          |          | -0.021       | 4.808  |          |          | 0.677          | 5.464  | 5.732e-3 | 1.788e-2 |                         |     |       |       |    |    |    |   |   |   |   |  |
| AAL94595.1   Oxygen-independent coproporphyrinogen III oxidase                |               |               |                 |                 |               |        |          |          |               |        |          |          |                |        |          |          |              |        |          |          |                |        |          |          |                         |     |       |       |    |    |    |   |   |   |   |  |
| <b>FN0393</b>                                                                 | 0.932         | 7.413         | 1.252e-2        | 1.484e-2        | <b>1.616</b>  | 8.281  | 3.461e-3 | 1.344e-2 | <b>-0.799</b> | 5.478  | 6.439e-5 | 5.787e-5 | -1.731         | 6.615  | 7.869e-3 | 5.162e-3 | 0.683        | 9.213  | 7.93e-2  | 5.305e-2 | <b>-2.414</b>  | 7.482  | 3.101e-3 | 8.002e-3 |                         |     |       |       |    |    |    |   |   |   |   |  |
| AAL94596.1   Polysaccharide deacetylase                                       |               |               |                 |                 |               |        |          |          |               |        |          |          |                |        |          |          |              |        |          |          |                |        |          |          |                         |     |       |       |    |    |    |   |   |   |   |  |
| <b>FN0394</b>                                                                 | 0.531         | 7.684         | 1.818e-1        | 4.925e-1        | -0.481        | 6.856  |          |          | -0.889        | 6.059  |          |          | -1.421         | 6.795  |          |          | -1.012       | 7.388  |          |          | -0.409         | 5.967  |          |          |                         |     |       |       |    |    |    |   |   |   |   |  |
| AAL94597.1   Outer membrane protein                                           |               |               |                 |                 |               |        |          |          |               |        |          |          |                |        |          |          |              |        |          |          |                |        |          |          |                         |     |       |       |    |    |    |   |   |   |   |  |
| <b>FN0396</b>                                                                 | <b>0.402</b>  | <b>24.004</b> | <b>5.688e-4</b> | <b>1.869e-4</b> | 0.640         | 24.426 | 9.475e-3 | 4.386e-2 | <b>0.388</b>  | 23.786 | 1.779e-4 | 2.444e-4 | -0.014         | 24.392 | 2.315e-1 | 7.221e-1 | 0.238        | 24.828 | 1.754e-1 | 2.514e-1 | -0.252         | 24.814 | 5.178e-2 | 2.319e-1 |                         |     |       |       |    |    |    |   |   |   |   |  |
| AAL94599.1   Dipeptide-binding protein                                        |               |               |                 |                 |               |        |          |          |               |        |          |          |                |        |          |          |              |        |          |          |                |        |          |          |                         |     |       |       |    |    |    |   |   |   |   |  |
| <b>FN0397</b>                                                                 | -0.052        | 10.905        |                 |                 | -0.015        | 11.126 | 1.467e-1 | 9.138e-1 | 0.292         | 11.044 | 9.168e-3 | 3.727e-2 | 0.344          | 11.196 |          |          | 0.037        | 11.074 |          |          | 0.307          | 11.418 | 7.009e-3 | 2.287e-2 |                         |     |       |       |    |    |    |   |   |   |   |  |
| AAL94600.1   Dipeptide transport system permease protein dppB                 |               |               |                 |                 |               |        |          |          |               |        |          |          |                |        |          |          |              |        |          |          |                |        |          |          |                         |     |       |       |    |    |    |   |   |   |   |  |
| <b>FN0398</b>                                                                 | <b>-1.058</b> | <b>11.387</b> | <b>8.884e-4</b> | <b>3.919e-4</b> | <b>-0.502</b> | 12.128 | 1.843e-3 | 6.179e-3 | <b>-0.506</b> | 11.735 | 2.89e-3  | 9.437e-3 | 0.552          | 10.881 | 6.125e-3 | 3.399e-3 | 0.556        | 11.070 | 3.375e-2 | 1.123e-2 | -0.005         | 11.622 | 1.823e-1 | 9.645e-1 |                         |     |       |       |    |    |    |   |   |   |   |  |
| AAL94601.1   Dipeptide transport system permease protein dppC                 |               |               |                 |                 |               |        |          |          |               |        |          |          |                |        |          |          |              |        |          |          |                |        |          |          |                         |     |       |       |    |    |    |   |   |   |   |  |
| <b>FN0399</b>                                                                 | -0.543        | 15.278        | 1.413e-2        | 1.723e-2        | -0.236        | 15.770 | 3.738e-2 | 2.036e-1 | -0.367        | 15.250 | 9.994e-3 | 4.12e-2  | 0.176          | 14.911 | 1.494e-1 | 3.993e-1 | 0.307        | 15.227 | 1.549e-1 | 2.022e-1 | -0.132         | 15.402 | 1.068e-1 | 5.174e-1 |                         |     |       |       |    |    |    |   |   |   |   |  |
| AAL94602.1   Dipeptide transport ATP-binding protein dppD                     |               |               |                 |                 |               |        |          |          |               |        |          |          |                |        |          |          |              |        |          |          |                |        |          |          |                         |     |       |       |    |    |    |   |   |   |   |  |
| <b>FN0400</b>                                                                 | <b>-0.684</b> | <b>17.806</b> | <b>3.158e-3</b> | <b>2.414e-3</b> | <b>-0.487</b> | 18.187 | 6.672e-4 | 1.787e-3 | <b>-1.174</b> | 17.112 | 1.348e-4 | 1.662e-4 | -0.490         | 16.632 | 1.36e-2  | 1.205e-2 | 0.197        | 17.503 | 1.169e-1 | 1.136e-1 | <b>-0.687</b>  | 17.013 | 2.663e-4 | 3.311e-4 |                         |     |       |       |    |    |    |   |   |   |   |  |
| AAL94603.1   Dipeptide transport ATP-binding protein dppF                     |               |               |                 |                 |               |        |          |          |               |        |          |          |                |        |          |          |              |        |          |          |                |        |          |          |                         |     |       |       |    |    |    |   |   |   |   |  |
| <b>FN0405</b>                                                                 | -0.284        | 12.911        | 1.443e-1        | 3.61e-1         | -0.293        | 13.086 | 7.528e-3 | 3.343e-2 | <b>0.742</b>  | 13.733 | 4.952e-3 | 1.804e-2 | 1.026          | 13.653 | 1.135e-2 | 9.178e-3 | -0.009       | 12.802 | 4.281e-1 | 9.774e-1 | <b>1.035</b>   | 13.828 | 3.145e-3 | 8.145e-3 |                         |     |       |       |    |    |    |   |   |   |   |  |
| AAL94608.1   Tryptophanyl-tRNA synthetase                                     |               |               |                 |                 |               |        |          |          |               |        |          |          |                |        |          |          |              |        |          |          |                |        |          |          |                         |     |       |       |    |    |    |   |   |   |   |  |
| <b>FN0406</b>                                                                 | <b>-1.164</b> | <b>11.391</b> | <b>1.616e-7</b> | <b>2.24e-9</b>  | <b>-1.516</b> | 11.223 | 5.528e-4 | 1.399e-3 | <b>-0.395</b> | 11.956 | 2.87e-3  | 9.355e-3 | 0.769          | 10.997 | 6.987e-3 | 4.197e-3 | -0.352       | 10.060 | 1.482e-1 | 1.851e-1 | <b>1.121</b>   | 10.829 | 8.129e-4 | 1.473e-3 |                         |     |       |       |    |    |    |   |   |   |   |  |
| AAL94609.1   Alanine racemase, biosynthetic                                   |               |               |                 |                 |               |        |          |          |               |        |          |          |                |        |          |          |              |        |          |          |                |        |          |          |                         |     |       |       |    |    |    |   |   |   |   |  |
| <b>FN0407</b>                                                                 | -2.102        | 10.887        |                 |                 | <b>-1.735</b> | 11.438 | 4.116e-5 | 4.583e-5 | 0.167         | 12.951 | 3.356e-2 | 1.642e-1 | 2.268          | 11.053 |          |          | 0.367        | 9.336  |          |          | <b>1.902</b>   | 11.604 | 3.189e-4 | 4.188e-4 |                         |     |       |       |    |    |    |   |   |   |   |  |
| AAL94610.1   Hypothetical protein                                             |               |               |                 |                 |               |        |          |          |               |        |          |          |                |        |          |          |              |        |          |          |                |        |          |          |                         |     |       |       |    |    |    |   |   |   |   |  |
| <b>FN0408</b>                                                                 | -0.747        | 12.388        | 5.938e-2        | 1.142e-1        | -0.129        | 13.191 | 4.838e-2 | 2.692e-1 | -0.372        | 12.560 | 6.445e-3 | 2.47e-2  | 0.375          | 12.016 | 1.543e-1 | 4.166e-1 | 0.618        | 12.444 | 1.478e-1 | 1.84e-1  | -0.243         | 12.819 | 1.574e-2 | 5.965e-2 |                         |     |       |       |    |    |    |   |   |   |   |  |
| AAL94611.1   Acetyl-coenzyme A carboxylase carboxyl transferase subunit beta  |               |               |                 |                 |               |        |          |          |               |        |          |          |                |        |          |          |              |        |          |          |                |        |          |          |                         |     |       |       |    |    |    |   |   |   |   |  |
| <b>FN0409</b>                                                                 | <b>-1.080</b> | <b>17.074</b> | <b>1.773e-3</b> | <b>1.08e-3</b>  | <b>-0.987</b> | 17.352 | 2.609e-6 | 6.883e-7 | 0.047         | 17.998 | 1.012e-1 | 5.699e-1 | <b>1.127</b>   | 17.122 | 9.283e-4 | 2.139e-4 | 0.093        | 16.272 | 2.99e-1  | 5.569e-1 | <b>1.034</b>   | 17.399 | 9.59e-4  | 1.833e-3 |                         |     |       |       |    |    |    |   |   |   |   |  |
| AAL94612.1   Acetyl-coenzyme A carboxylase carboxyl transferase subunit alpha |               |               |                 |                 |               |        |          |          |               |        |          |          |                |        |          |          |              |        |          |          |                |        |          |          |                         |     |       |       |    |    |    |   |   |   |   |  |
| <b>FN0410</b>                                                                 | <b>-0.698</b> | <b>13.649</b> | <b>2.14e-4</b>  | <b>4.225e-5</b> | <b>-0.464</b> | 14.068 | 6.416e-4 | 1.696e-3 | <b>-0.330</b> | 13.814 | 1.17e-5  | 3.94e-6  | <b>0.368</b>   | 13.319 | 1.163e-3 | 3.104e-4 | 0.234        | 13.369 | 4.817e-2 | 2.113e-2 | 0.134          | 13.738 | 2.035e-2 | 8.044e-2 |                         |     |       |       |    |    |    |   |   |   |   |  |
| AAL94613.1   6-phosphofructokinase                                            |               |               |                 |                 |               |        |          |          |               |        |          |          |                |        |          |          |              |        |          |          |                |        |          |          |                         |     |       |       |    |    |    |   |   |   |   |  |
| <b>FN0411</b>                                                                 |               |               |                 |                 | 0.597         | 7.565  |          |          |               |        |          |          |                |        |          |          |              |        |          |          |                |        |          |          |                         |     |       |       |    |    |    |   |   |   |   |  |
| AAL94614.1   putative alpha helix protein                                     |               |               |                 |                 |               |        |          |          |               |        |          |          |                |        |          |          |              |        |          |          |                |        |          |          |                         |     |       |       |    |    |    |   |   |   |   |  |
| <b>FN0412</b>                                                                 |               |               |                 |                 |               |        |          |          |               |        |          |          |                |        |          |          |              |        |          |          |                |        |          |          |                         |     |       |       |    |    |    |   |   |   |   |  |
| AAL94615.1   Recombination protein recR                                       |               |               |                 |                 |               |        |          |          |               |        |          |          |                |        |          |          |              |        |          |          |                |        |          |          |                         |     |       |       |    |    |    |   |   |   |   |  |

Show detected proteins only  
 Show all proteins  
 Filter by category:

Proteins found: 1424

Test Cutoff

| Signif | Direction | Applies To   |
|--------|-----------|--------------|
| yes    | +         | ratios, bars |
| no     | n/a       | bars         |
| yes    | -         | ratios, bars |
| yes    | +         | p-, q-Values |
| yes    | -         | p-, q-Values |

FnPg vs Fn — █ — FnSg vs Fn

FnPgSg vs Fn — █ — FnPgSg vs FnPg

FnSg vs FnPg — █ — FnPgSg vs FnSg



Fn Summary Table   FnPg vs Fn   FnSg vs Fn   FnPgSg vs Fn   FnPgSg vs FnPg   FnSg vs FnPg   FnPgSg vs FnSg   Fn Coverage

| ORF           | FnPg vs Fn                                                                |        |          |          | FnSg vs Fn |        |          |          | FnPgSg vs Fn |        |          |          | FnPgSg vs FnPg |        |          |          | FnSg vs FnPg |        |          |          | FnPgSg vs FnSg |        |          |          | Log <sub>2</sub> Ratios |     |       |       |    |    |    |   |   |   |   |
|---------------|---------------------------------------------------------------------------|--------|----------|----------|------------|--------|----------|----------|--------------|--------|----------|----------|----------------|--------|----------|----------|--------------|--------|----------|----------|----------------|--------|----------|----------|-------------------------|-----|-------|-------|----|----|----|---|---|---|---|
|               | Ratio                                                                     | Sum    | q-Val    | p-Val    | Ratio      | Sum    | q-Val    | p-Val    | Ratio        | Sum    | q-Val    | p-Val    | Ratio          | Sum    | q-Val    | p-Val    | Ratio        | Sum    | q-Val    | p-Val    | Ratio          | Sum    | q-Val    | p-Val    | Ratio                   | Sum | q-Val | p-Val | -6 | -4 | -2 | 0 | 2 | 4 | 6 |
| <b>FN0413</b> | 0.938                                                                     | 4.669  |          |          |            |        |          |          | 0.236        | 3.764  |          |          | -0.701         | 4.905  |          |          |              |        |          |          |                |        |          |          |                         |     |       |       |    |    |    |   |   |   |   |
|               | AAL94616.1   unknown                                                      |        |          |          |            |        |          |          |              |        |          |          |                |        |          |          |              |        |          |          |                |        |          |          |                         |     |       |       |    |    |    |   |   |   |   |
| <b>FN0414</b> |                                                                           |        |          |          |            |        |          |          |              |        |          |          |                |        |          |          |              |        |          |          | 0.779          | 4.779  |          |          |                         |     |       |       |    |    |    |   |   |   |   |
|               | AAL94617.1   ATP-dependent helicase HEPA                                  |        |          |          |            |        |          |          |              |        |          |          |                |        |          |          |              |        |          |          |                |        |          |          |                         |     |       |       |    |    |    |   |   |   |   |
| <b>FN0416</b> | -1.077                                                                    | 8.326  |          |          |            |        |          |          | -1.240       | 7.959  | 1.825e-3 | 5.409e-3 | -0.163         | 7.086  |          |          |              |        |          |          |                |        |          |          |                         |     |       |       |    |    |    |   |   |   |   |
|               | AAL94619.1   Type III restriction-modification system methylation subunit |        |          |          |            |        |          |          |              |        |          |          |                |        |          |          |              |        |          |          |                |        |          |          |                         |     |       |       |    |    |    |   |   |   |   |
| <b>FN0417</b> | -1.788                                                                    | 9.867  |          |          | -2.598     | 9.242  |          |          | -2.222       | 9.230  | 1.308e-4 | 1.591e-4 | -0.434         | 7.645  |          |          | -0.810       | 7.453  |          |          | 0.376          | 7.020  |          |          |                         |     |       |       |    |    |    |   |   |   |   |
|               | AAL94620.1   Type III restriction-modification system restriction subunit |        |          |          |            |        |          |          |              |        |          |          |                |        |          |          |              |        |          |          |                |        |          |          |                         |     |       |       |    |    |    |   |   |   |   |
| <b>FN0418</b> |                                                                           |        |          |          |            |        |          |          |              |        |          |          | -3.964         | 8.168  |          |          | 0.413        | 12.730 |          |          | -4.377         | 8.766  |          |          |                         |     |       |       |    |    |    |   |   |   |   |
|               | AAL94621.1   Uracil phosphoribosyltransferase                             |        |          |          |            |        |          |          |              |        |          |          |                |        |          |          |              |        |          |          |                |        |          |          |                         |     |       |       |    |    |    |   |   |   |   |
| <b>FN0419</b> | 0.272                                                                     | 7.477  |          |          | -0.540     | 6.849  |          |          | -0.696       | 6.305  |          |          | -0.968         | 6.780  | 1.024e-2 | 7.839e-3 | -0.812       | 7.121  | 3.494e-2 | 1.199e-2 | -0.156         | 6.153  | 1.149e-1 | 5.614e-1 |                         |     |       |       |    |    |    |   |   |   |   |
|               | AAL94622.1   Aspartate carbamoyltransferase                               |        |          |          |            |        |          |          |              |        |          |          |                |        |          |          |              |        |          |          |                |        |          |          |                         |     |       |       |    |    |    |   |   |   |   |
| <b>FN0420</b> | 1.054                                                                     | 8.770  | 1.263e-1 | 3.048e-1 | 1.325      | 9.226  | 7.44e-3  | 3.298e-2 | -2.171       | 5.341  |          |          | -3.225         | 6.599  |          |          | 0.271        | 10.280 | 3.414e-1 | 6.767e-1 | -3.496         | 7.055  |          |          |                         |     |       |       |    |    |    |   |   |   |   |
|               | AAL94623.1   Dihydroorotase                                               |        |          |          |            |        |          |          |              |        |          |          |                |        |          |          |              |        |          |          |                |        |          |          |                         |     |       |       |    |    |    |   |   |   |   |
| <b>FN0421</b> | 0.774                                                                     | 9.870  |          |          | 0.333      | 9.614  | 2.941e-3 | 1.095e-2 | -1.542       | 7.350  | 3.29e-5  | 2.008e-5 | -2.316         | 8.328  |          |          | -0.441       | 10.388 |          |          | -1.876         | 8.072  | 3.952e-5 | 2.469e-5 |                         |     |       |       |    |    |    |   |   |   |   |
|               | AAL94624.1   Carbamoyl-phosphate synthase small chain                     |        |          |          |            |        |          |          |              |        |          |          |                |        |          |          |              |        |          |          |                |        |          |          |                         |     |       |       |    |    |    |   |   |   |   |
| <b>FN0422</b> | -0.715                                                                    | 13.950 | 9.791e-2 | 2.211e-1 | 0.151      | 15.001 | 2.346e-2 | 1.22e-1  | -1.107       | 13.354 | 2.957e-4 | 4.957e-4 | -0.392         | 12.843 | 2.026e-1 | 6.076e-1 | 0.866        | 14.286 | 1.306e-1 | 1.411e-1 | -1.258         | 13.894 | 5.972e-4 | 9.625e-4 |                         |     |       |       |    |    |    |   |   |   |   |
|               | AAL94625.1   Carbamoyl-phosphate synthase large chain                     |        |          |          |            |        |          |          |              |        |          |          |                |        |          |          |              |        |          |          |                |        |          |          |                         |     |       |       |    |    |    |   |   |   |   |
| <b>FN0423</b> | 0.481                                                                     | 7.519  |          |          | 1.262      | 8.485  | 7.005e-4 | 1.908e-3 | -0.906       | 5.929  | 1.149e-2 | 4.821e-2 | -1.386         | 6.614  |          |          | 0.781        | 8.966  |          |          | -2.168         | 7.580  | 3.677e-7 | 3.48e-8  |                         |     |       |       |    |    |    |   |   |   |   |
|               | AAL94626.1   Dihydroorotate dehydrogenase electron transfer subunit       |        |          |          |            |        |          |          |              |        |          |          |                |        |          |          |              |        |          |          |                |        |          |          |                         |     |       |       |    |    |    |   |   |   |   |
| <b>FN0424</b> | 0.993                                                                     | 5.667  | 1.049e-1 | 2.411e-1 | 1.988      | 6.847  | 1.193e-3 | 3.68e-3  | -0.650       | 3.820  |          |          | -1.643         | 5.017  |          |          | 0.995        | 7.839  | 8.033e-2 | 5.452e-2 | -2.638         | 6.196  |          |          |                         |     |       |       |    |    |    |   |   |   |   |
|               | AAL94627.1   Dihydroorotate dehydrogenase                                 |        |          |          |            |        |          |          |              |        |          |          |                |        |          |          |              |        |          |          |                |        |          |          |                         |     |       |       |    |    |    |   |   |   |   |
| <b>FN0426</b> | 1.087                                                                     | 9.071  | 1.221e-1 | 2.916e-1 | 1.669      | 9.837  | 1.307e-4 | 2.226e-4 | 0.490        | 8.271  | 2.317e-2 | 1.066e-1 | -0.596         | 9.561  | 1.705e-1 | 4.762e-1 | 0.582        | 10.924 | 2.025e-1 | 3.186e-1 | -1.179         | 10.328 | 4.122e-4 | 5.785e-4 |                         |     |       |       |    |    |    |   |   |   |   |
|               | AAL94629.1   Orotidine 5'-phosphate decarboxylase                         |        |          |          |            |        |          |          |              |        |          |          |                |        |          |          |              |        |          |          |                |        |          |          |                         |     |       |       |    |    |    |   |   |   |   |
| <b>FN0427</b> | -0.092                                                                    | 11.470 | 1.324e-1 | 3.233e-1 | -0.086     | 11.660 | 7.203e-2 | 4.125e-1 | -0.336       | 11.021 | 1.975e-3 | 5.97e-3  | -0.244         | 11.133 | 4.001e-2 | 5.756e-2 | 0.006        | 11.569 | 4.234e-1 | 9.585e-1 | -0.251         | 11.324 | 1.969e-2 | 7.742e-2 |                         |     |       |       |    |    |    |   |   |   |   |
|               | AAL94630.1   Orotate phosphoribosyltransferase                            |        |          |          |            |        |          |          |              |        |          |          |                |        |          |          |              |        |          |          |                |        |          |          |                         |     |       |       |    |    |    |   |   |   |   |
| <b>FN0430</b> | -1.332                                                                    | 14.971 | 4.591e-3 | 4.041e-3 | -0.701     | 15.787 | 1.786e-4 | 3.339e-4 | -0.602       | 15.497 | 3.365e-4 | 5.911e-4 | 0.730          | 14.369 | 3.995e-2 | 5.745e-2 | 0.631        | 14.454 | 9.84e-2  | 8.267e-2 | 0.099          | 15.184 | 7.447e-2 | 3.479e-1 |                         |     |       |       |    |    |    |   |   |   |   |
|               | AAL94633.1   LSU ribosomal protein L19P                                   |        |          |          |            |        |          |          |              |        |          |          |                |        |          |          |              |        |          |          |                |        |          |          |                         |     |       |       |    |    |    |   |   |   |   |
| <b>FN0435</b> | 0.230                                                                     | 11.661 | 2.416e-1 | 7.102e-1 | 0.052      | 11.668 | 1.009e-1 | 5.961e-1 | -0.657       | 10.570 | 3.348e-2 | 1.637e-1 | -0.888         | 11.004 | 1.248e-1 | 3.081e-1 | -0.178       | 11.898 | 3.704e-1 | 7.682e-1 | -0.710         | 11.011 | 3.245e-2 | 1.362e-1 |                         |     |       |       |    |    |    |   |   |   |   |
|               | AAL94634.1   Purine nucleoside phosphorylase                              |        |          |          |            |        |          |          |              |        |          |          |                |        |          |          |              |        |          |          |                |        |          |          |                         |     |       |       |    |    |    |   |   |   |   |
| <b>FN0436</b> | 1.228                                                                     | 11.009 | 3.199e-2 | 4.913e-2 | 1.333      | 11.299 | 1.074e-2 | 5.071e-2 | -0.470       | 9.107  | 3.133e-2 | 1.512e-1 | -1.698         | 10.539 | 2.224e-2 | 2.468e-2 | 0.105        | 12.527 | 3.77e-1  | 7.9e-1   | -1.804         | 10.829 | 8.356e-3 | 2.832e-2 |                         |     |       |       |    |    |    |   |   |   |   |
|               | AAL94635.1   regulator of kinase autophosphorylation inhibitor            |        |          |          |            |        |          |          |              |        |          |          |                |        |          |          |              |        |          |          |                |        |          |          |                         |     |       |       |    |    |    |   |   |   |   |
| <b>FN0437</b> | 0.279                                                                     | 7.134  | 2.359e-1 | 6.883e-1 | 0.806      | 7.847  | 7.057e-4 | 1.927e-3 | -0.598       | 6.054  | 4.03e-2  | 2.03e-1  | -0.877         | 6.536  | 1.355e-1 | 3.493e-1 | 0.528        | 8.125  | 2.155e-1 | 3.488e-1 | -1.404         | 7.249  | 2.962e-3 | 7.557e-3 |                         |     |       |       |    |    |    |   |   |   |   |
|               | AAL94636.1   kinase autophosphorylation inhibitor KipI                    |        |          |          |            |        |          |          |              |        |          |          |                |        |          |          |              |        |          |          |                |        |          |          |                         |     |       |       |    |    |    |   |   |   |   |

Show detected proteins only

Show all proteins

Filter by category:

GO: amino acid transport

Proteins found: 1424

Enter (or paste) list of ORFs

Find ORFs

Test      Cutoff

q-Value      .005

p-Value

Dot Plots

Dot Plots

| Signif | Direction | Applies To   |
|--------|-----------|--------------|
| yes    | +         | ratios, bars |
| no     | n/a       | bars         |
| yes    | -         | ratios, bars |
| yes    | +         | p-, q-Values |
| yes    | -         | p-, q-Values |

FnPg vs Fn — █ — FnSg vs Fn

FnPgSg vs Fn — █ — FnPgSg vs FnPg

FnSg vs FnPg — █ — FnPgSg vs FnSg

Fn Summary Table

FnPg vs Fn

FnSg vs Fn

FnPgSg vs Fn

FnPgSg vs FnPg

FnSg vs FnPg

FnPgSg vs FnSg

Fn Coverage

| ORF           | FnPg vs Fn                                                                    |        |          |          | FnSg vs Fn |        |          |          | FnPgSg vs Fn |        |          |          | FnPgSg vs FnPg |        |          |          | FnSg vs FnPg |        |          |          | FnPgSg vs FnSg |        |          |          | Log <sub>2</sub> Ratios |     |       |       |    |    |    |   |   |   |
|---------------|-------------------------------------------------------------------------------|--------|----------|----------|------------|--------|----------|----------|--------------|--------|----------|----------|----------------|--------|----------|----------|--------------|--------|----------|----------|----------------|--------|----------|----------|-------------------------|-----|-------|-------|----|----|----|---|---|---|
|               | Ratio                                                                         | Sum    | q-Val    | p-Val    | Ratio      | Sum    | q-Val    | p-Val    | Ratio        | Sum    | q-Val    | p-Val    | Ratio          | Sum    | q-Val    | p-Val    | Ratio        | Sum    | q-Val    | p-Val    | Ratio          | Sum    | q-Val    | p-Val    | Ratio                   | Sum | q-Val | p-Val | -6 | -4 | -2 | 0 | 2 | 4 |
| <b>FN0438</b> | AAL94637.1   transporter protein                                              |        |          |          |            |        |          |          |              |        |          |          |                |        |          |          |              |        |          |          |                |        |          |          |                         |     |       |       |    |    |    |   |   |   |
| <b>FN0439</b> | 0.336                                                                         | 12.037 | 2.36e-1  | 6.889e-1 | -0.040     | 11.845 | 1.436e-1 | 8.912e-1 | -0.011       | 11.486 | 1.562e-1 | 9.369e-1 | -0.348         | 12.026 | 2.208e-1 | 6.794e-1 | -0.376       | 12.182 | 3.377e-1 | 6.657e-1 | 0.029          | 11.834 | 1.751e-1 | 9.185e-1 |                         |     |       |       |    |    |    |   |   |   |
|               | AAL94638.1   Lactam utilization protein LAMB                                  |        |          |          |            |        |          |          |              |        |          |          |                |        |          |          |              |        |          |          |                |        |          |          |                         |     |       |       |    |    |    |   |   |   |
| <b>FN0445</b> | AAL94641.1   Hypothetical protein                                             |        |          |          |            |        |          |          |              |        |          |          |                |        |          |          |              |        |          |          |                |        |          |          |                         |     |       |       |    |    |    |   |   |   |
| <b>FN0446</b> | -1.008                                                                        | 7.281  | 6.665e-5 | 7.553e-6 | 0.027      | 8.501  | 1.438e-1 | 8.924e-1 | -0.567       | 7.518  | 1.677e-4 | 2.247e-4 | 0.441          | 6.714  | 7.506e-3 | 4.744e-3 | 1.035        | 7.493  | 5.234e-2 | 2.483e-2 | -0.594         | 7.934  | 1.861e-2 | 7.25e-2  |                         |     |       |       |    |    |    |   |   |   |
|               | AAL94642.1   Hypothetical protein                                             |        |          |          |            |        |          |          |              |        |          |          |                |        |          |          |              |        |          |          |                |        |          |          |                         |     |       |       |    |    |    |   |   |   |
| <b>FN0447</b> | 0.262                                                                         | 4.908  |          |          | 1.685      | 6.516  | 9.326e-4 | 2.737e-3 | -0.221       | 4.221  |          |          | -0.483         | 4.687  |          |          | 1.424        | 6.778  |          |          | -1.907         | 6.295  |          |          |                         |     |       |       |    |    |    |   |   |   |
|               | AAL94643.1   NIFS protein                                                     |        |          |          |            |        |          |          |              |        |          |          |                |        |          |          |              |        |          |          |                |        |          |          |                         |     |       |       |    |    |    |   |   |   |
| <b>FN0448</b> | AAL94644.1   DNA-repair protein                                               |        |          |          |            |        |          |          |              |        |          |          |                |        |          |          |              |        |          |          |                |        |          |          |                         |     |       |       |    |    |    |   |   |   |
| <b>FN0450</b> | -1.177                                                                        | 9.532  | 4.1e-2   | 6.82e-2  | -0.482     | 10.411 | 4.827e-2 | 2.685e-1 | -0.980       | 9.525  | 1.959e-2 | 8.824e-2 | 0.197          | 8.552  | 9.774e-2 | 2.114e-1 | 0.695        | 9.234  | 9.329e-2 | 7.519e-2 | -0.497         | 9.431  | 3.205e-2 | 1.343e-1 |                         |     |       |       |    |    |    |   |   |   |
|               | AAL94646.1   ABC transporter ATP-binding protein                              |        |          |          |            |        |          |          |              |        |          |          |                |        |          |          |              |        |          |          |                |        |          |          |                         |     |       |       |    |    |    |   |   |   |
| <b>FN0451</b> | -0.516                                                                        | 6.131  |          |          | -0.319     | 6.512  | 3.795e-2 | 2.069e-1 | -0.864       | 5.579  |          |          | -0.348         | 5.267  |          |          | 0.197        | 5.996  |          |          | -0.545         | 5.649  |          |          |                         |     |       |       |    |    |    |   |   |   |
|               | AAL94647.1   Hypothetical protein                                             |        |          |          |            |        |          |          |              |        |          |          |                |        |          |          |              |        |          |          |                |        |          |          |                         |     |       |       |    |    |    |   |   |   |
| <b>FN0452</b> | -0.429                                                                        | 18.476 | 1.721e-1 | 4.565e-1 | -1.837     | 17.252 | 5.216e-6 | 2.031e-6 | 0.015        | 18.716 | 9.886e-2 | 5.552e-1 | 0.444          | 18.490 | 1.609e-1 | 4.405e-1 | -1.408       | 16.823 | 1.636e-1 | 2.228e-1 | 1.852          | 17.267 | 8.434e-5 | 6.921e-5 |                         |     |       |       |    |    |    |   |   |   |
|               | AAL94648.1   Glucosamine--fructose-6-phosphate aminotransferase (isomerizing) |        |          |          |            |        |          |          |              |        |          |          |                |        |          |          |              |        |          |          |                |        |          |          |                         |     |       |       |    |    |    |   |   |   |
| <b>FN0453</b> | 0.787                                                                         | 16.502 | 9.092e-3 | 1.012e-2 | 0.296      | 16.195 | 2.768e-3 | 1.014e-2 | -0.220       | 15.291 | 4.987e-3 | 1.819e-2 | -1.007         | 16.282 | 7.377e-3 | 4.603e-3 | -0.491       | 16.982 | 5.095e-2 | 2.353e-2 | -0.516         | 15.975 | 4.527e-4 | 6.539e-4 |                         |     |       |       |    |    |    |   |   |   |
|               | AAL94649.1   Xaa-Pro aminopeptidase                                           |        |          |          |            |        |          |          |              |        |          |          |                |        |          |          |              |        |          |          |                |        |          |          |                         |     |       |       |    |    |    |   |   |   |
| <b>FN0454</b> | 0.855                                                                         | 13.882 | 7.932e-2 | 1.68e-1  | 1.417      | 14.629 | 1.243e-3 | 3.873e-3 | -0.507       | 12.316 | 4.712e-5 | 3.749e-5 | -1.363         | 13.375 | 5.399e-2 | 8.967e-2 | 0.562        | 15.484 | 1.351e-1 | 1.513e-1 | -1.924         | 14.121 | 1.148e-3 | 2.325e-3 |                         |     |       |       |    |    |    |   |   |   |
|               | AAL94650.1   Aldehyde dehydrogenase B                                         |        |          |          |            |        |          |          |              |        |          |          |                |        |          |          |              |        |          |          |                |        |          |          |                         |     |       |       |    |    |    |   |   |   |
| <b>FN0455</b> | 1.074                                                                         | 16.135 | 4.143e-3 | 3.49e-3  | 1.718      | 16.964 | 4.709e-4 | 1.134e-3 | 1.180        | 16.037 | 2.472e-3 | 7.79e-3  | 0.106          | 17.315 | 1.844e-1 | 5.307e-1 | 0.644        | 18.038 | 1.388e-2 | 2.762e-3 | -0.538         | 18.144 | 3.535e-3 | 9.458e-3 |                         |     |       |       |    |    |    |   |   |   |
|               | AAL94651.1   Rubrerythrin                                                     |        |          |          |            |        |          |          |              |        |          |          |                |        |          |          |              |        |          |          |                |        |          |          |                         |     |       |       |    |    |    |   |   |   |
| <b>FN0456</b> | -2.394                                                                        | 10.091 | 2.686e-4 | 6.088e-5 | -2.542     | 10.127 | 1.164e-5 | 7.519e-6 | -1.123       | 11.157 | 2.866e-5 | 1.568e-5 | 1.270          | 8.967  | 1.495e-3 | 4.502e-4 | -0.148       | 7.733  | 3.022e-1 | 5.655e-1 | 1.418          | 9.004  | 1.978e-5 | 9.115e-6 |                         |     |       |       |    |    |    |   |   |   |
|               | AAL94652.1   Hypothetical cytosolic protein                                   |        |          |          |            |        |          |          |              |        |          |          |                |        |          |          |              |        |          |          |                |        |          |          |                         |     |       |       |    |    |    |   |   |   |
| <b>FN0458</b> | 1.533                                                                         | 5.806  | 2.136e-2 | 2.941e-2 | 0.808      | 5.266  | 1.363e-2 | 6.682e-2 | 0.645        | 4.714  |          |          | -0.888         | 6.451  |          |          | -0.725       | 6.798  | 1.092e-1 | 1.002e-1 | -0.163         | 5.910  |          |          |                         |     |       |       |    |    |    |   |   |   |
|               | AAL94654.1   Hypothetical Exported Protein                                    |        |          |          |            |        |          |          |              |        |          |          |                |        |          |          |              |        |          |          |                |        |          |          |                         |     |       |       |    |    |    |   |   |   |
| <b>FN0459</b> | AAL94655.1   Hypothetical exported 24-amino acid repeat protein               |        |          |          |            |        |          |          |              |        |          |          |                |        |          |          |              |        |          |          |                |        |          |          |                         |     |       |       |    |    |    |   |   |   |
| <b>FN0460</b> | -0.196                                                                        | 11.810 |          |          | -2.267     | 9.924  | 2.218e-5 | 1.897e-5 | -1.497       | 10.305 | 6.626e-5 | 6.025e-5 | -1.301         | 10.313 |          |          | -2.071       | 9.728  |          |          | 0.770          | 8.427  | 5.348e-3 | 1.637e-2 |                         |     |       |       |    |    |    |   |   |   |
|               | AAL94656.1   Delta-aminolevulinic acid dehydratase                            |        |          |          |            |        |          |          |              |        |          |          |                |        |          |          |              |        |          |          |                |        |          |          |                         |     |       |       |    |    |    |   |   |   |
| <b>FN0461</b> | 0.389                                                                         | 16.697 | 1.504e-1 | 3.809e-1 | -0.447     | 16.045 | 3.707e-5 | 3.893e-5 | -0.409       | 15.695 | 3.45e-4  | 6.121e-4 | -0.798         | 16.288 | 8.224e-2 | 1.623e-1 | -0.836       | 16.434 | 1.356e-1 | 1.524e-1 | 0.038          | 15.636 | 1.155e-1 | 5.651e-1 |                         |     |       |       |    |    |    |   |   |   |
|               | AAL94657.1   Probable sigma(54) modulation protein                            |        |          |          |            |        |          |          |              |        |          |          |                |        |          |          |              |        |          |          |                |        |          |          |                         |     |       |       |    |    |    |   |   |   |

Show detected proteins only

Show all proteins

Filter by category:

GO: amino acid transport

Proteins found: 1424

Enter (or paste) list of ORFs

Find ORFs

Test Cutoff

q-Value .005

p-Value

Dot Plots

Dot Plots

| Signif | Direction | Applies To   |
|--------|-----------|--------------|
| yes    | +         | ratios, bars |
| no     | n/a       | bars         |
| yes    | -         | ratios, bars |
| yes    | +         | p-, q-Values |
| yes    | -         | p-, q-Values |

FnPg vs Fn

FnPgSg vs Fn

FnSg vs FnPg

FnPgSg vs FnSg

FnSg vs Fn

FnPgSg vs FnPg

FnPgSg vs FnSg

Fn Summary Table FnPg vs Fn FnSg vs Fn FnPgSg vs Fn FnPgSg vs FnPg FnSg vs FnPg FnPgSg vs FnSg Fn Coverage

| ORF                                                                  | FnPg vs Fn |        |          |          | FnSg vs Fn |        |          |          | FnPgSg vs Fn |        |          |           | FnPgSg vs FnPg |        |          |          | FnSg vs FnPg |        |          |          | FnPgSg vs FnSg |        |          |          | Log <sub>2</sub> Ratios |     |       |       |    |    |    |   |   |   |   |  |
|----------------------------------------------------------------------|------------|--------|----------|----------|------------|--------|----------|----------|--------------|--------|----------|-----------|----------------|--------|----------|----------|--------------|--------|----------|----------|----------------|--------|----------|----------|-------------------------|-----|-------|-------|----|----|----|---|---|---|---|--|
|                                                                      | Ratio      | Sum    | q-Val    | p-Val    | Ratio      | Sum    | q-Val    | p-Val    | Ratio        | Sum    | q-Val    | p-Val     | Ratio          | Sum    | q-Val    | p-Val    | Ratio        | Sum    | q-Val    | p-Val    | Ratio          | Sum    | q-Val    | p-Val    | Ratio                   | Sum | q-Val | p-Val | -6 | -4 | -2 | 0 | 2 | 4 | 6 |  |
| <b>FN0462</b><br>AAL94658.1   DNA mismatch repair protein mutL       | 0.045      | 11.170 | 2.852e-1 | 8.896e-1 | 1.070      | 12.379 | 5.154e-3 | 2.142e-2 | -1.400       | 9.521  | 1.37e-6  | 2.122e-7  | -1.445         | 9.770  | 3.763e-2 | 5.285e-2 | 1.025        | 12.425 | 4.38e-2  | 1.773e-2 | -2.470         | 10.980 | 2.488e-3 | 6.106e-3 |                         |     |       |       |    |    |    |   |   |   |   |  |
| <b>FN0465</b><br>AAL94661.1   Hypothetical protein                   | 0.270      | 16.294 | 2.351e-1 | 6.853e-1 | -0.612     | 15.596 | 3.061e-3 | 1.151e-2 | -1.256       | 14.564 | 4.782e-4 | 9.431e-4  | -1.526         | 15.038 | 8.973e-2 | 1.849e-1 | -0.882       | 15.866 | 2.019e-1 | 3.172e-1 | -0.644         | 14.340 | 1.392e-2 | 5.177e-2 |                         |     |       |       |    |    |    |   |   |   |   |  |
| <b>FN0466</b><br>AAL94662.1   Lysyl-tRNA synthetase                  | 0.383      | 17.561 | 5.203e-2 | 9.458e-2 | 0.347      | 17.710 | 9.443e-3 | 4.369e-2 | -0.060       | 16.914 | 1.128e-1 | 6.434e-1  | -0.443         | 17.501 | 4.501e-2 | 6.802e-2 | -0.036       | 18.093 | 3.916e-1 | 8.402e-1 | -0.408         | 17.650 | 9.611e-3 | 3.34e-2  |                         |     |       |       |    |    |    |   |   |   |   |  |
| <b>FN0469</b><br>AAL94665.1   Copper homeostasis protein cutC        |            |        |          |          |            |        |          |          |              |        |          |           |                |        |          |          |              |        |          |          |                |        |          |          |                         |     |       |       |    |    |    |   |   |   |   |  |
| <b>FN0470</b><br>AAL94666.1   Putative efflux pump component MtrF    | -0.034     | 18.282 | 2.706e-1 | 8.272e-1 | -0.411     | 18.091 | 3.507e-3 | 1.366e-2 | -0.264       | 17.849 | 9.081e-3 | 3.685e-2  | -0.229         | 18.019 | 9.585e-2 | 2.049e-1 | -0.376       | 18.056 | 9.883e-2 | 8.33e-2  | 0.147          | 17.827 | 4.969e-2 | 2.213e-1 |                         |     |       |       |    |    |    |   |   |   |   |  |
| <b>FN0472</b><br>AAL94668.1   Flavodoxin                             | 1.659      | 24.440 | 5.982e-3 | 5.795e-3 | 1.030      | 23.996 | 1.242e-7 | 7.722e-9 | 1.747        | 24.324 | 1.612e-8 | 2.726e-10 | 0.089          | 26.187 | 1.916e-1 | 5.605e-1 | -0.628       | 25.655 | 6.442e-2 | 3.553e-2 | 0.717          | 25.743 | 1.814e-7 | 9.116e-9 |                         |     |       |       |    |    |    |   |   |   |   |  |
| <b>FN0474</b><br>AAL94670.1   Acriflavin resistance protein B        |            |        |          |          | -0.688     | 5.449  |          |          |              |        |          |           |                |        |          |          |              |        |          |          |                |        |          |          |                         |     |       |       |    |    |    |   |   |   |   |  |
| <b>FN0475</b><br>AAL94671.1   MIAB protein                           | -1.548     | 10.467 |          |          | -1.090     | 11.110 | 3.04e-4  | 6.535e-4 | -2.051       | 9.760  | 1.464e-4 | 1.867e-4  | -0.503         | 8.416  |          |          | 0.458        | 9.562  |          |          | -0.961         | 9.059  | 1.569e-3 | 3.417e-3 |                         |     |       |       |    |    |    |   |   |   |   |  |
| <b>FN0476</b><br>AAL94672.1   Transcription termination factor rho   | -0.244     | 11.690 | 1.564e-1 | 4.011e-1 | 0.309      | 12.427 | 8.648e-3 | 3.932e-2 | 0.349        | 12.079 | 2.206e-3 | 6.801e-3  | 0.593          | 12.038 | 4.505e-2 | 6.809e-2 | 0.553        | 12.183 | 9.89e-2  | 8.341e-2 | 0.040          | 12.776 | 1.414e-1 | 7.123e-1 |                         |     |       |       |    |    |    |   |   |   |   |  |
| <b>FN0477</b><br>AAL94673.1   Cell wall endopeptidase family M23/M37 | -2.372     | 10.157 | 4.722e-6 | 2.484e-7 | -1.264     | 11.449 | 3.036e-6 | 9.079e-7 | -2.734       | 9.591  | 5.255e-6 | 1.223e-6  | -0.362         | 7.423  | 1.064e-2 | 8.346e-3 | 1.108        | 9.077  | 4.597e-3 | 5.034e-4 | -1.470         | 8.715  | 3.416e-4 | 4.569e-4 |                         |     |       |       |    |    |    |   |   |   |   |  |
| <b>FN0478</b><br>AAL94674.1   GcpE protein                           | 1.361      | 8.814  |          |          | 1.215      | 8.853  | 5.409e-8 | 1.765e-9 | -0.326       | 6.924  | 2.915e-2 | 1.388e-1  | -1.686         | 8.489  |          |          | -0.145       | 10.214 |          |          | -1.541         | 8.528  | 4.136e-4 | 5.812e-4 |                         |     |       |       |    |    |    |   |   |   |   |  |
| <b>FN0479</b><br>AAL94675.1   RNA polymerase sigma-E factor          |            |        |          |          |            |        |          |          |              |        |          |           |                |        |          |          |              |        |          |          |                |        |          |          |                         |     |       |       |    |    |    |   |   |   |   |  |
| <b>FN0480</b><br>AAL94676.1   unknown                                |            |        |          |          |            |        |          |          |              |        |          |           |                |        |          |          |              |        |          |          |                |        |          |          |                         |     |       |       |    |    |    |   |   |   |   |  |
| <b>FN0481</b><br>AAL94677.1   unknown                                | -0.697     | 7.616  |          |          | -1.008     | 7.489  | 1.335e-2 | 6.525e-2 |              |        |          |           |                |        |          |          | -0.311       | 6.792  |          |          |                |        |          |          |                         |     |       |       |    |    |    |   |   |   |   |  |
| <b>FN0482</b><br>AAL94678.1   LSU ribosomal protein L31P             | -2.778     | 7.948  |          |          |            |        |          |          | 0.455        | 10.977 | 2.631e-2 | 1.232e-1  | 3.233          | 8.403  |          |          |              |        |          |          |                |        |          |          |                         |     |       |       |    |    |    |   |   |   |   |  |
| <b>FN0483</b><br>AAL94679.1   Uracil phosphoribosyltransferase       | -1.016     | 13.224 | 8.106e-3 | 8.797e-3 | -1.286     | 13.140 | 8.803e-6 | 4.795e-6 | -0.298       | 13.739 | 1.011e-3 | 2.428e-3  | 0.718          | 12.927 | 2.902e-2 | 3.626e-2 | -0.269       | 12.123 | 2.504e-1 | 4.361e-1 | 0.988          | 12.842 | 4.783e-5 | 3.29e-5  |                         |     |       |       |    |    |    |   |   |   |   |  |
| <b>FN0484</b><br>AAL94680.1   Lipase                                 | -0.959     | 5.603  |          |          | -0.185     | 6.561  |          |          | -1.179       | 5.179  |          |           | -0.220         | 4.424  |          |          | 0.773        | 5.602  |          |          | -0.994         | 5.382  |          |          |                         |     |       |       |    |    |    |   |   |   |   |  |

Show detected proteins only  
 Show all proteins  
 Filter by category:

Proteins found: 1424

Test Cutoff

| Signif | Direction | Applies To   |
|--------|-----------|--------------|
| yes    | +         | ratios, bars |
| no     | n/a       | bars         |
| yes    | -         | ratios, bars |
| yes    | +         | p-, q-Values |
| yes    | -         | p-, q-Values |

FnPg vs Fn

FnPgSg vs Fn

FnSg vs FnPg

FnPgSg vs FnSg

Fn Summary Table

FnPg vs Fn

FnSg vs Fn

FnPgSg vs Fn

FnPgSg vs FnPg

FnSg vs FnPg

FnPgSg vs FnSg

Fn Coverage

| ORF                                                                           | FnPg vs Fn |        |          |          | FnSg vs Fn |        |          |          | FnPgSg vs Fn |        |          |          | FnPgSg vs FnPg |        |          |          | FnSg vs FnPg |        |          |          | FnPgSg vs FnSg |        |          |          | Log <sub>2</sub> Ratios |     |       |       |    |    |    |   |   |   |   |  |
|-------------------------------------------------------------------------------|------------|--------|----------|----------|------------|--------|----------|----------|--------------|--------|----------|----------|----------------|--------|----------|----------|--------------|--------|----------|----------|----------------|--------|----------|----------|-------------------------|-----|-------|-------|----|----|----|---|---|---|---|--|
|                                                                               | Ratio      | Sum    | q-Val    | p-Val    | Ratio      | Sum    | q-Val    | p-Val    | Ratio        | Sum    | q-Val    | p-Val    | Ratio          | Sum    | q-Val    | p-Val    | Ratio        | Sum    | q-Val    | p-Val    | Ratio          | Sum    | q-Val    | p-Val    | Ratio                   | Sum | q-Val | p-Val | -6 | -4 | -2 | 0 | 2 | 4 | 6 |  |
| <b>FN0487</b><br>AAL94683.1   2-hydroxyglutarate dehydrogenase                | -0.121     | 20.283 | 2.279e-1 | 6.579e-1 | -0.012     | 20.576 | 1.472e-1 | 9.17e-1  | -0.002       | 20.199 | 1.601e-1 | 9.651e-1 | 0.119          | 20.282 | 2.164e-1 | 6.62e-1  | 0.108        | 20.456 | 3.514e-1 | 7.074e-1 | 0.010          | 20.575 | 1.767e-1 | 9.282e-1 |                         |     |       |       |    |    |    |   |   |   |   |  |
| <b>FN0488</b><br>AAL94684.1   NAD-specific glutamate dehydrogenase            | 0.305      | 23.556 | 1.465e-1 | 3.683e-1 | 0.468      | 23.904 | 5.984e-3 | 2.547e-2 | 0.232        | 23.279 | 6.43e-3  | 2.463e-2 | -0.073         | 23.789 | 2.513e-1 | 8.049e-1 | 0.163        | 24.209 | 3.054e-1 | 5.741e-1 | -0.236         | 24.136 | 2.745e-2 | 1.127e-1 |                         |     |       |       |    |    |    |   |   |   |   |  |
| <b>FN0489</b><br>AAL94685.1   Prolipoprotein diacylglycerol transferase       | -1.186     | 8.105  |          |          | -1.567     | 7.907  |          |          | 0.489        | 9.576  | 9.597e-3 | 3.936e-2 | 1.675          | 8.594  |          |          | -0.382       | 6.722  |          |          | 2.057          | 8.397  |          |          |                         |     |       |       |    |    |    |   |   |   |   |  |
| <b>FN0490</b><br>AAL94686.1   Integral membrane protein                       |            |        |          |          |            |        |          |          |              |        |          |          |                |        |          |          |              |        |          |          |                |        |          |          |                         |     |       |       |    |    |    |   |   |   |   |  |
| <b>FN0491</b><br>AAL94687.1   Alanine racemase                                | 1.570      | 13.188 | 5.768e-1 | 1.094e-1 | 1.725      | 13.527 | 1.111e-3 | 3.377e-3 | -0.523       | 10.891 | 3.977e-2 | 1.999e-1 | -2.093         | 12.665 | 5.09e-2  | 8.176e-2 | 0.155        | 15.097 | 3.622e-1 | 7.414e-1 | -2.248         | 13.004 | 2.198e-3 | 5.202e-3 |                         |     |       |       |    |    |    |   |   |   |   |  |
| <b>FN0493</b><br>AAL94689.1   Hypothetical protein                            | -0.264     | 8.762  | 1.677e-1 | 4.405e-1 | -0.771     | 8.440  | 8.499e-3 | 3.853e-2 | -2.267       | 6.556  | 9.329e-4 | 2.185e-3 | -2.003         | 6.496  | 3.013e-2 | 3.827e-2 | -0.507       | 8.176  | 1.956e-1 | 3.031e-1 | -1.495         | 6.173  | 1.472e-2 | 5.518e-2 |                         |     |       |       |    |    |    |   |   |   |   |  |
| <b>FN0494</b><br>AAL94690.1   Short chain dehydrogenase                       | -1.417     | 17.059 | 1.5e-4   | 2.529e-5 | -2.331     | 16.329 | 9.05e-6  | 5.001e-6 | -0.350       | 17.923 | 1.919e-3 | 5.765e-3 | 1.067          | 16.710 | 9.095e-4 | 2.072e-4 | -0.915       | 14.912 | 3.853e-2 | 1.411e-2 | 1.982          | 15.979 | 3.216e-5 | 1.793e-5 |                         |     |       |       |    |    |    |   |   |   |   |  |
| <b>FN0495</b><br>AAL94691.1   Acetyl-CoA acetyltransferase                    | 1.116      | 25.792 | 5.159e-5 | 5.034e-6 | 0.783      | 25.644 | 2.586e-6 | 6.78e-7  | 0.423        | 24.896 | 3.67e-5  | 2.497e-5 | -0.693         | 26.215 | 5.156e-5 | 2.831e-6 | -0.333       | 26.760 | 6.737e-4 | 1.257e-5 | -0.360         | 26.067 | 8.608e-6 | 2.227e-6 |                         |     |       |       |    |    |    |   |   |   |   |  |
| <b>FN0496</b><br>AAL94692.1   unknown                                         |            |        |          |          |            |        |          |          |              |        |          |          |                |        |          |          |              |        |          |          |                |        |          |          |                         |     |       |       |    |    |    |   |   |   |   |  |
| <b>FN0497</b><br>AAL94693.1   Plasmid addiction system poison protein         |            |        |          |          |            |        |          |          |              |        |          |          |                |        |          |          |              |        |          |          |                |        |          |          |                         |     |       |       |    |    |    |   |   |   |   |  |
| <b>FN0501</b><br>AAL94697.1   Ornithine decarboxylase                         | 0.635      | 16.730 | 9.468e-2 | 2.115e-1 | 1.084      | 17.363 | 2.303e-4 | 4.551e-4 | -0.572       | 15.318 | 1.268e-3 | 3.314e-3 | -1.208         | 16.157 | 5.254e-2 | 8.588e-2 | 0.449        | 17.998 | 1.558e-1 | 2.044e-1 | -1.656         | 16.791 | 3.928e-4 | 5.439e-4 |                         |     |       |       |    |    |    |   |   |   |   |  |
| <b>FN0502</b><br>AAL94698.1   Phosphoheptose isomerase                        | 1.032      | 7.887  |          |          | 1.003      | 8.044  |          |          | 1.159        | 7.811  | 1.78e-5  | 7.62e-6  | 0.127          | 9.046  |          |          | -0.028       | 9.075  |          |          | 0.155          | 9.203  |          |          |                         |     |       |       |    |    |    |   |   |   |   |  |
| <b>FN0503</b><br>AAL94699.1   Transcriptional regulatory protein, LYSR family | -0.592     | 11.037 | 4.431e-2 | 7.591e-2 | -0.224     | 11.590 | 8.655e-3 | 3.936e-2 | -0.137       | 11.289 | 2.524e-2 | 1.175e-1 | 0.456          | 10.900 | 7.943e-2 | 1.543e-1 | 0.369        | 10.998 | 1.683e-1 | 2.34e-1  | 0.087          | 11.453 | 4.988e-4 | 7.451e-4 |                         |     |       |       |    |    |    |   |   |   |   |  |
| <b>FN0504</b><br>AAL94700.1   Arginine permease                               |            |        |          |          |            |        |          |          |              |        |          |          |                |        |          |          |              |        |          |          |                |        |          |          |                         |     |       |       |    |    |    |   |   |   |   |  |
| <b>FN0505</b><br>AAL94701.1   Anthranilate synthase component II              | 0.947      | 11.277 | 7.569e-2 | 1.579e-1 | -0.293     | 10.222 | 3.952e-2 | 2.162e-1 | -0.498       | 9.628  | 3.89e-4  | 7.23e-4  | -1.445         | 10.779 | 5.441e-2 | 9.08e-2  | -1.240       | 11.169 | 1.138e-1 | 1.081e-1 | -0.205         | 9.723  | 8.974e-2 | 4.265e-1 |                         |     |       |       |    |    |    |   |   |   |   |  |
| <b>FN0506</b><br>AAL94702.1   Arginyl-tRNA synthetase                         | -0.638     | 14.994 | 2.51e-2  | 3.606e-2 | -1.284     | 14.532 | 3.941e-5 | 4.277e-5 | 0.209        | 15.637 | 4.281e-2 | 2.173e-1 | 0.847          | 15.202 | 1.271e-2 | 1.085e-2 | -0.647       | 13.894 | 1.081e-1 | 9.817e-2 | 1.493          | 14.740 | 1.575e-3 | 3.434e-3 |                         |     |       |       |    |    |    |   |   |   |   |  |
| <b>FN0511</b><br>AAL94707.1   D-lactate dehydrogenase                         | 0.404      | 11.177 | 2.162e-1 | 6.149e-1 | 0.593      | 11.550 | 2.722e-3 | 9.935e-3 | -0.866       | 9.704  | 2.724e-3 | 8.769e-3 | -1.270         | 10.311 | 1.143e-1 | 2.706e-1 | 0.189        | 11.954 | 3.714e-1 | 7.714e-1 | -1.458         | 10.684 | 1.359e-3 | 2.857e-3 |                         |     |       |       |    |    |    |   |   |   |   |  |

Show detected proteins only  
 Show all proteins  
 Filter by category:

Proteins found: 1424

Enter (or paste) list of ORFs

Find ORFs

Test Cutoff

q-Value .005

p-Value

Dot Plots

| Signif | Direction | Applies To   |
|--------|-----------|--------------|
| yes    | +         | ratios, bars |
| no     | n/a       | bars         |
| yes    | -         | ratios, bars |
| yes    | +         | p-, q-Values |
| yes    | -         | p-, q-Values |



Fn Summary Table

FnPg vs Fn

FnSg vs Fn

FnPgSg vs Fn

FnPgSg vs FnPg

FnSg vs FnPg

FnPgSg vs FnSg

Fn Coverage

| ORF                                                             | FnPg vs Fn |        |          |          | FnSg vs Fn |        |          |          | FnPgSg vs Fn |        |          |          | FnPgSg vs FnPg |        |          |          | FnSg vs FnPg |        |          |          | FnPgSg vs FnSg |        |          |          | Log <sub>2</sub> Ratios |     |       |       |    |    |    |   |   |   |   |  |
|-----------------------------------------------------------------|------------|--------|----------|----------|------------|--------|----------|----------|--------------|--------|----------|----------|----------------|--------|----------|----------|--------------|--------|----------|----------|----------------|--------|----------|----------|-------------------------|-----|-------|-------|----|----|----|---|---|---|---|--|
|                                                                 | Ratio      | Sum    | q-Val    | p-Val    | Ratio      | Sum    | q-Val    | p-Val    | Ratio        | Sum    | q-Val    | p-Val    | Ratio          | Sum    | q-Val    | p-Val    | Ratio        | Sum    | q-Val    | p-Val    | Ratio          | Sum    | q-Val    | p-Val    | Ratio                   | Sum | q-Val | p-Val | -6 | -4 | -2 | 0 | 2 | 4 | 6 |  |
| <b>FN0512</b>                                                   | 0.714      | 15.779 | 4.243e-4 | 1.178e-4 | 0.226      | 15.475 | 1.275e-3 | 3.995e-3 | 0.175        | 15.036 | 4.996e-3 | 1.823e-2 | -0.540         | 15.954 | 2.949e-7 | 1.311e-9 | -0.489       | 16.189 | 2.394e-3 | 1.65e-4  | -0.051         | 15.650 | 4.334e-2 | 1.896e-1 |                         |     |       |       |    |    |    |   |   |   |   |  |
| AAL94708.1   Flavoprotein                                       |            |        |          |          |            |        |          |          |              |        |          |          |                |        |          |          |              |        |          |          |                |        |          |          |                         |     |       |       |    |    |    |   |   |   |   |  |
| <b>FN0513</b>                                                   | -1.712     | 8.768  | 1.029e-3 | 4.909e-4 | -1.158     | 9.508  | 5.895e-4 | 1.519e-3 | 0.391        | 10.668 | 3.591e-5 | 2.388e-5 | 2.104          | 9.160  | 5.135e-4 | 9.2e-5   | 0.555        | 7.795  | 1.212e-1 | 1.219e-1 | 1.549          | 9.899  | 2.193e-4 | 2.491e-4 |                         |     |       |       |    |    |    |   |   |   |   |  |
| AAL94709.1   Flavodoxin                                         |            |        |          |          |            |        |          |          |              |        |          |          |                |        |          |          |              |        |          |          |                |        |          |          |                         |     |       |       |    |    |    |   |   |   |   |  |
| <b>FN0515</b>                                                   | -0.928     | 4.098  |          |          | 0.321      | 5.532  | 6.431e-2 | 3.652e-1 |              |        |          |          |                |        |          |          | 1.249        | 4.604  |          |          |                |        |          |          |                         |     |       |       |    |    |    |   |   |   |   |  |
| AAL94711.1   Acriflavin resistance protein D                    |            |        |          |          |            |        |          |          |              |        |          |          |                |        |          |          |              |        |          |          |                |        |          |          |                         |     |       |       |    |    |    |   |   |   |   |  |
| <b>FN0516</b>                                                   |            |        |          |          |            |        |          |          |              |        |          |          |                |        |          |          |              |        |          |          |                |        |          |          |                         |     |       |       |    |    |    |   |   |   |   |  |
| AAL94712.1   Acriflavin resistance protein E                    |            |        |          |          |            |        |          |          |              |        |          |          |                |        |          |          |              |        |          |          |                |        |          |          |                         |     |       |       |    |    |    |   |   |   |   |  |
| <b>FN0517</b>                                                   |            |        |          |          |            |        |          |          |              |        |          |          |                |        |          |          | 0.979        | 5.808  |          |          |                |        |          |          |                         |     |       |       |    |    |    |   |   |   |   |  |
| AAL94713.1   Outer membrane protein toIC                        |            |        |          |          |            |        |          |          |              |        |          |          |                |        |          |          |              |        |          |          |                |        |          |          |                         |     |       |       |    |    |    |   |   |   |   |  |
| <b>FN0519</b>                                                   | 0.080      | 6.962  | 2.602e-1 | 7.842e-1 | -0.386     | 6.680  | 6.403e-2 | 3.635e-1 | -1.396       | 5.281  |          |          | -1.477         | 5.566  |          |          | -0.466       | 6.760  | 1.258e-1 | 1.313e-1 | -1.010         | 5.284  |          |          |                         |     |       |       |    |    |    |   |   |   |   |  |
| AAL94715.1   Hypothetical exported 24-amino acid repeat protein |            |        |          |          |            |        |          |          |              |        |          |          |                |        |          |          |              |        |          |          |                |        |          |          |                         |     |       |       |    |    |    |   |   |   |   |  |
| <b>FN0522</b>                                                   | 0.833      | 5.810  |          |          | 1.464      | 6.626  | 2.139e-3 | 7.388e-3 | -0.444       | 4.329  |          |          | -1.278         | 5.366  |          |          | 0.631        | 7.459  |          |          | -1.908         | 6.182  |          |          |                         |     |       |       |    |    |    |   |   |   |   |  |
| AAL94718.1   Exonuclease SBCC                                   |            |        |          |          |            |        |          |          |              |        |          |          |                |        |          |          |              |        |          |          |                |        |          |          |                         |     |       |       |    |    |    |   |   |   |   |  |
| <b>FN0523</b>                                                   | -2.435     | 6.514  |          |          | -1.612     | 7.522  | 1.603e-3 | 5.249e-3 |              |        |          |          |                |        |          |          | 0.823        | 5.086  |          |          |                |        |          |          |                         |     |       |       |    |    |    |   |   |   |   |  |
| AAL94719.1   Exonuclease SBCE                                   |            |        |          |          |            |        |          |          |              |        |          |          |                |        |          |          |              |        |          |          |                |        |          |          |                         |     |       |       |    |    |    |   |   |   |   |  |
| <b>FN0524</b>                                                   |            |        |          |          |            |        |          |          |              |        |          |          | 1.188          | 7.161  | 1.317e-3 | 3.751e-4 | 0.131        | 6.289  | 3.37e-1  | 6.635e-1 | 1.057          | 7.477  | 3.061e-3 | 7.872e-3 |                         |     |       |       |    |    |    |   |   |   |   |  |
| AAL94720.1   DNA helicase II                                    |            |        |          |          |            |        |          |          |              |        |          |          |                |        |          |          |              |        |          |          |                |        |          |          |                         |     |       |       |    |    |    |   |   |   |   |  |
| <b>FN0525</b>                                                   | -1.036     | 14.898 | 3.154e-2 | 4.824e-2 | -0.149     | 15.969 | 6.84e-2  | 3.902e-1 | -0.997       | 14.733 | 2.544e-5 | 1.291e-5 | 0.038          | 13.901 | 2.818e-1 | 9.405e-1 | 0.887        | 14.933 | 9.659e-2 | 8.002e-2 | -0.848         | 14.972 | 6.896e-3 | 2.242e-2 |                         |     |       |       |    |    |    |   |   |   |   |  |
| AAL94721.1   Penicillin-binding protein                         |            |        |          |          |            |        |          |          |              |        |          |          |                |        |          |          |              |        |          |          |                |        |          |          |                         |     |       |       |    |    |    |   |   |   |   |  |
| <b>FN0526</b>                                                   | 0.310      | 11.406 |          |          | 0.275      | 11.555 | 8.998e-3 | 4.123e-2 | -0.169       | 10.723 | 3.901e-2 | 1.955e-1 | -0.479         | 11.237 |          |          | -0.035       | 11.865 |          |          | -0.443         | 11.386 | 4.394e-3 | 1.267e-2 |                         |     |       |       |    |    |    |   |   |   |   |  |
| AAL94722.1   Florfenicol resistance protein                     |            |        |          |          |            |        |          |          |              |        |          |          |                |        |          |          |              |        |          |          |                |        |          |          |                         |     |       |       |    |    |    |   |   |   |   |  |
| <b>FN0527</b>                                                   | 0.950      | 9.787  | 6.384e-3 | 6.342e-3 | 1.118      | 10.139 | 1.279e-3 | 4.01e-3  | -0.976       | 7.656  | 7.51e-4  | 1.665e-3 | -1.927         | 8.810  | 5.171e-3 | 2.646e-3 | 0.168        | 11.089 | 2.08e-1  | 3.312e-1 | -2.095         | 9.163  | 1.056e-3 | 2.084e-3 |                         |     |       |       |    |    |    |   |   |   |   |  |
| AAL94723.1   Alanyl-tRNA synthetase                             |            |        |          |          |            |        |          |          |              |        |          |          |                |        |          |          |              |        |          |          |                |        |          |          |                         |     |       |       |    |    |    |   |   |   |   |  |
| <b>FN0528</b>                                                   | -2.764     | 18.819 | 1.531e-3 | 8.813e-4 | -5.943     | 15.825 | 2.971e-6 | 8.705e-7 | -0.907       | 20.473 | 7.938e-5 | 7.754e-5 | 1.857          | 17.912 | 9.068e-3 | 6.487e-3 | -3.178       | 13.061 | 1.321e-1 | 1.446e-1 | 5.036          | 14.918 | 2e-4     | 2.185e-4 |                         |     |       |       |    |    |    |   |   |   |   |  |
| AAL94724.1   Cold shock protein                                 |            |        |          |          |            |        |          |          |              |        |          |          |                |        |          |          |              |        |          |          |                |        |          |          |                         |     |       |       |    |    |    |   |   |   |   |  |
| <b>FN0535</b>                                                   | 0.648      | 10.623 | 3.787e-3 | 3.085e-3 | -0.144     | 10.016 | 6.605e-2 | 3.758e-1 | 1.124        | 10.896 | 7.88e-5  | 7.674e-5 | 0.476          | 11.748 | 1.946e-3 | 6.75e-4  | -0.792       | 10.664 | 1.084e-2 | 1.924e-3 | 1.268          | 11.141 | 2.193e-4 | 2.491e-4 |                         |     |       |       |    |    |    |   |   |   |   |  |
| AAL94731.1   Hypothetical protein                               |            |        |          |          |            |        |          |          |              |        |          |          |                |        |          |          |              |        |          |          |                |        |          |          |                         |     |       |       |    |    |    |   |   |   |   |  |
| <b>FN0536</b>                                                   | -0.352     | 15.236 | 7.724e-2 | 1.622e-1 | -0.290     | 15.482 | 2.938e-3 | 1.093e-2 | 0.227        | 15.611 | 3.896e-5 | 2.846e-5 | 0.579          | 15.463 | 3.396e-2 | 4.578e-2 | 0.062        | 15.130 | 3.784e-1 | 7.947e-1 | 0.517          | 15.709 | 9.179e-4 | 1.732e-3 |                         |     |       |       |    |    |    |   |   |   |   |  |
| AAL94732.1   DNA polymerase III, beta chain                     |            |        |          |          |            |        |          |          |              |        |          |          |                |        |          |          |              |        |          |          |                |        |          |          |                         |     |       |       |    |    |    |   |   |   |   |  |
| <b>FN0540</b>                                                   | -0.944     | 11.020 | 4.112e-2 | 6.849e-2 | -0.525     | 11.624 | 7.07e-4  | 1.932e-3 | -0.795       | 10.965 | 1.277e-4 | 1.538e-4 | 0.149          | 10.225 | 2.428e-1 | 7.688e-1 | 0.419        | 10.679 | 2.342e-1 | 3.957e-1 | -0.270         | 10.828 | 1.773e-2 | 6.856e-2 |                         |     |       |       |    |    |    |   |   |   |   |  |
| AAL94736.1   Glutamate-1-semialdehyde 2,1-aminomutase           |            |        |          |          |            |        |          |          |              |        |          |          |                |        |          |          |              |        |          |          |                |        |          |          |                         |     |       |       |    |    |    |   |   |   |   |  |
| <b>FN0541</b>                                                   |            |        |          |          | -0.612     | 7.079  | 5.117e-2 | 2.862e-1 |              |        |          |          |                |        |          |          |              |        |          |          |                |        |          |          |                         |     |       |       |    |    |    |   |   |   |   |  |
| AAL94737.1   polysaccharide deacetylase                         |            |        |          |          |            |        |          |          |              |        |          |          |                |        |          |          |              |        |          |          |                |        |          |          |                         |     |       |       |    |    |    |   |   |   |   |  |

Show detected proteins only

Show all proteins

Filter by category:

GO: amino acid transport

Proteins found: 1424

Enter (or paste) list of ORFs

Find ORFs

**Test**      **Cutoff**

q-Value      .005

p-Value

Dot Plots

Dot Plots

| Signif | Direction | Applies To   |
|--------|-----------|--------------|
| yes    | +         | ratios, bars |
| no     | n/a       | bars         |
| yes    | -         | ratios, bars |
| yes    | +         | p-, q-Values |
| yes    | -         | p-, q-Values |

FnPg vs Fn — █ — FnSg vs Fn

FnPgSg vs Fn — █ — FnPgSg vs FnPg

FnSg vs FnPg — █ — FnPgSg vs FnSg

Fn Summary Table   FnPg vs Fn   FnSg vs Fn   FnPgSg vs Fn   FnPgSg vs FnPg   FnSg vs FnPg   FnPgSg vs FnSg   Fn Coverage

| ORF                                                            | FnPg vs Fn |        |          |          | FnSg vs Fn |        |          |          | FnPgSg vs Fn |        |          |          | FnPgSg vs FnPg |        |          |          | FnSg vs FnPg |        |          |          | FnPgSg vs FnSg |        |          |          | Log <sub>2</sub> Ratios |     |       |       |    |    |    |   |   |   |   |  |
|----------------------------------------------------------------|------------|--------|----------|----------|------------|--------|----------|----------|--------------|--------|----------|----------|----------------|--------|----------|----------|--------------|--------|----------|----------|----------------|--------|----------|----------|-------------------------|-----|-------|-------|----|----|----|---|---|---|---|--|
|                                                                | Ratio      | Sum    | q-Val    | p-Val    | Ratio      | Sum    | q-Val    | p-Val    | Ratio        | Sum    | q-Val    | p-Val    | Ratio          | Sum    | q-Val    | p-Val    | Ratio        | Sum    | q-Val    | p-Val    | Ratio          | Sum    | q-Val    | p-Val    | Ratio                   | Sum | q-Val | p-Val | -6 | -4 | -2 | 0 | 2 | 4 | 6 |  |
| <b>FN0542</b>                                                  | 0.849      | 8.771  | 1.668e-1 | 4.372e-1 | 1.042      | 9.148  | 2.806e-3 | 1.032e-2 | 0.228        | 7.946  |          |          | -0.621         | 9.000  |          |          | 0.192        | 9.997  | 3.784e-1 | 7.949e-1 | -0.813         | 9.376  |          |          |                         |     |       |       |    |    |    |   |   |   |   |  |
| AAL94738.1   Beta 1,4 glucosyltransferase                      |            |        |          |          |            |        |          |          |              |        |          |          |                |        |          |          |              |        |          |          |                |        |          |          |                         |     |       |       |    |    |    |   |   |   |   |  |
| <b>FN0543</b>                                                  | -1.094     | 10.321 | 2.493e-2 | 3.574e-2 | -1.605     | 9.994  | 5.674e-6 | 2.34e-6  | -0.931       | 10.280 | 3.401e-5 | 1.141e-5 | 0.163          | 9.390  | 2.35e-1  | 7.363e-1 | -0.511       | 8.900  | 2.444e-1 | 4.214e-1 | 0.674          | 9.063  | 1.376e-3 | 2.901e-3 |                         |     |       |       |    |    |    |   |   |   |   |  |
| AAL94739.1   Lipopolysaccharide heptosyltransferase-1          |            |        |          |          |            |        |          |          |              |        |          |          |                |        |          |          |              |        |          |          |                |        |          |          |                         |     |       |       |    |    |    |   |   |   |   |  |
| <b>FN0544</b>                                                  |            |        |          |          |            |        |          |          |              |        |          |          |                |        |          |          |              |        |          |          |                |        |          |          |                         |     |       |       |    |    |    |   |   |   |   |  |
| AAL94740.1   ADP-heptose:LPS heptosyltransferase II            |            |        |          |          |            |        |          |          |              |        |          |          |                |        |          |          |              |        |          |          |                |        |          |          |                         |     |       |       |    |    |    |   |   |   |   |  |
| <b>FN0546</b>                                                  | -0.281     | 5.451  |          |          |            |        |          |          |              |        |          |          |                |        |          |          |              |        |          |          |                |        |          |          |                         |     |       |       |    |    |    |   |   |   |   |  |
| AAL94742.1   Lipopolysaccharide core biosynthesis protein rfaQ |            |        |          |          |            |        |          |          |              |        |          |          |                |        |          |          |              |        |          |          |                |        |          |          |                         |     |       |       |    |    |    |   |   |   |   |  |
| <b>FN0547</b>                                                  | -1.334     | 16.732 | 7.476e-3 | 7.902e-3 | -0.434     | 17.816 | 9.961e-5 | 1.555e-4 | -0.841       | 17.021 | 1.858e-3 | 5.534e-3 | 0.493          | 15.891 | 9.93e-2  | 2.168e-1 | 0.900        | 16.482 | 6.395e-2 | 3.507e-2 | -0.407         | 16.976 | 1.557e-2 | 5.891e-2 |                         |     |       |       |    |    |    |   |   |   |   |  |
| AAL94743.1   RecA protein                                      |            |        |          |          |            |        |          |          |              |        |          |          |                |        |          |          |              |        |          |          |                |        |          |          |                         |     |       |       |    |    |    |   |   |   |   |  |
| <b>FN0549</b>                                                  |            |        |          |          | 1.632      | 5.769  |          |          |              |        |          |          |                |        |          |          |              |        |          |          |                |        |          |          |                         |     |       |       |    |    |    |   |   |   |   |  |
| AAL94745.1   O-sialoglycoprotein endopeptidase                 |            |        |          |          |            |        |          |          |              |        |          |          |                |        |          |          |              |        |          |          |                |        |          |          |                         |     |       |       |    |    |    |   |   |   |   |  |
| <b>FN0550</b>                                                  |            |        |          |          |            |        |          |          |              |        |          |          | -0.696         | 9.240  |          |          | -1.381       | 8.739  | 1.179e-1 | 1.155e-1 | 0.685          | 8.043  |          |          |                         |     |       |       |    |    |    |   |   |   |   |  |
| AAL94746.1   hypothetical Protein                              |            |        |          |          |            |        |          |          |              |        |          |          |                |        |          |          |              |        |          |          |                |        |          |          |                         |     |       |       |    |    |    |   |   |   |   |  |
| <b>FN0552</b>                                                  | 0.538      | 8.751  | 4.343e-2 | 7.384e-2 | 0.596      | 8.994  | 2.955e-2 | 1.574e-1 | -1.197       | 6.812  |          |          | -1.736         | 7.554  |          |          | 0.058        | 9.532  | 3.897e-2 | 8.338e-1 | -1.794         | 7.797  |          |          |                         |     |       |       |    |    |    |   |   |   |   |  |
| AAL94748.1   Serine racemase                                   |            |        |          |          |            |        |          |          |              |        |          |          |                |        |          |          |              |        |          |          |                |        |          |          |                         |     |       |       |    |    |    |   |   |   |   |  |
| <b>FN0553</b>                                                  | 0.711      | 13.762 | 9.265e-2 | 2.057e-1 | 1.235      | 14.471 | 3.442e-3 | 1.334e-2 | -0.155       | 12.692 | 3.125e-2 | 1.508e-1 | -0.866         | 13.607 | 8.074e-2 | 1.58e-1  | 0.524        | 15.182 | 1.491e-1 | 1.876e-1 | -1.390         | 14.316 | 3.49e-3  | 9.303e-3 |                         |     |       |       |    |    |    |   |   |   |   |  |
| AAL94749.1   D-serine dehydratase                              |            |        |          |          |            |        |          |          |              |        |          |          |                |        |          |          |              |        |          |          |                |        |          |          |                         |     |       |       |    |    |    |   |   |   |   |  |
| <b>FN0554</b>                                                  | 1.694      | 6.477  |          |          | 1.980      | 6.947  |          |          | -0.705       | 3.875  |          |          | -2.399         | 5.773  |          |          | 0.286        | 8.642  | 2.214e-1 | 3.633e-1 | -2.684         | 6.243  |          |          |                         |     |       |       |    |    |    |   |   |   |   |  |
| AAL94750.1   D-serine permease                                 |            |        |          |          |            |        |          |          |              |        |          |          |                |        |          |          |              |        |          |          |                |        |          |          |                         |     |       |       |    |    |    |   |   |   |   |  |
| <b>FN0555</b>                                                  |            |        |          |          |            |        |          |          |              |        |          |          |                |        |          |          |              |        |          |          |                |        |          |          |                         |     |       |       |    |    |    |   |   |   |   |  |
| AAL94751.1   Transcriptional regulator, MerR family            |            |        |          |          |            |        |          |          |              |        |          |          |                |        |          |          |              |        |          |          |                |        |          |          |                         |     |       |       |    |    |    |   |   |   |   |  |
| <b>FN0556</b>                                                  | -0.194     | 12.234 | 2.387e-1 | 6.989e-1 | -0.711     | 11.901 | 3.251e-4 | 7.142e-4 | -2.016       | 10.209 | 3.889e-5 | 2.836e-5 | -1.821         | 10.218 | 6.762e-2 | 1.232e-1 | -0.517       | 11.707 | 2.519e-1 | 4.396e-1 | -1.304         | 9.886  | 1.066e-3 | 2.11e-3  |                         |     |       |       |    |    |    |   |   |   |   |  |
| AAL94752.1   unknown                                           |            |        |          |          |            |        |          |          |              |        |          |          |                |        |          |          |              |        |          |          |                |        |          |          |                         |     |       |       |    |    |    |   |   |   |   |  |
| <b>FN0557</b>                                                  | 1.582      | 12.845 | 4.794e-2 | 8.458e-2 | 2.218      | 13.666 | 4.033e-3 | 1.624e-2 | -0.995       | 10.065 | 2.426e-3 | 7.614e-3 | -2.576         | 11.851 | 3.589e-2 | 4.95e-2  | 0.637        | 15.248 | 1.458e-1 | 1.784e-1 | -3.213         | 12.672 | 3.976e-3 | 1.105e-2 |                         |     |       |       |    |    |    |   |   |   |   |  |
| AAL94753.1   unknown                                           |            |        |          |          |            |        |          |          |              |        |          |          |                |        |          |          |              |        |          |          |                |        |          |          |                         |     |       |       |    |    |    |   |   |   |   |  |
| <b>FN0558</b>                                                  | 2.171      | 14.188 |          |          | 0.685      | 12.886 | 1.435e-2 | 7.097e-2 | -1.116       | 10.697 | 1.296e-4 | 1.57e-4  | -3.288         | 13.072 |          |          | -1.486       | 15.058 |          |          | -1.801         | 11.770 | 4.484e-3 | 1.303e-2 |                         |     |       |       |    |    |    |   |   |   |   |  |
| AAL94754.1   TraT complement resistance protein precursor      |            |        |          |          |            |        |          |          |              |        |          |          |                |        |          |          |              |        |          |          |                |        |          |          |                         |     |       |       |    |    |    |   |   |   |   |  |
| <b>FN0559</b>                                                  | 0.991      | 14.564 | 4.928e-2 | 8.779e-2 | 0.719      | 14.477 | 4.336e-6 | 1.524e-6 | 0.204        | 13.574 | 4.672e-2 | 2.397e-1 | -0.786         | 14.769 | 6.733e-2 | 1.224e-1 | -0.272       | 15.468 | 2.57e-1  | 4.516e-1 | -0.515         | 14.682 | 5.467e-3 | 1.683e-2 |                         |     |       |       |    |    |    |   |   |   |   |  |
| AAL94755.1   Phosphoglucomutase                                |            |        |          |          |            |        |          |          |              |        |          |          |                |        |          |          |              |        |          |          |                |        |          |          |                         |     |       |       |    |    |    |   |   |   |   |  |
| <b>FN0560</b>                                                  |            |        |          |          |            |        |          |          |              |        |          |          |                |        |          |          |              |        |          |          |                |        |          |          |                         |     |       |       |    |    |    |   |   |   |   |  |
| AAL94756.1   Oxygen-independent coproporphyrinogen III oxidase |            |        |          |          |            |        |          |          |              |        |          |          |                |        |          |          |              |        |          |          |                |        |          |          |                         |     |       |       |    |    |    |   |   |   |   |  |
| <b>FN0561</b>                                                  | -0.125     | 11.120 | 1.507e-1 | 3.821e-1 | -0.899     | 10.531 | 3.948e-5 | 4.288e-5 | -0.851       | 10.190 | 1.578e-5 | 6.215e-6 | -0.726         | 10.269 | 1.729e-2 | 1.737e-2 | -0.774       | 10.406 | 4.26e-2  | 1.684e-2 | 0.048          | 9.680  | 8.862e-2 | 4.206e-1 |                         |     |       |       |    |    |    |   |   |   |   |  |
| AAL94757.1   Proline synthetase associated protein             |            |        |          |          |            |        |          |          |              |        |          |          |                |        |          |          |              |        |          |          |                |        |          |          |                         |     |       |       |    |    |    |   |   |   |   |  |

Show detected proteins only

Show all proteins

Filter by category:

GO: amino acid transport

Proteins found: 1424

Enter (or paste) list of ORFs

Find ORFs

Test Cutoff

q-Value p-Value

.005

Dot Plots

| Signif | Direction | Applies To   |
|--------|-----------|--------------|
| yes    | +         | ratios, bars |
| no     | n/a       | bars         |
| yes    | -         | ratios, bars |
| yes    | +         | p-, q-Values |
| yes    | -         | p-, q-Values |

FnPg vs Fn —

FnPgSg vs Fn —

FnSg vs FnPg —

FnSg vs Fn —

FnPgSg vs FnPg —

FnPgSg vs FnSg —

Fn Summary Table FnPg vs Fn FnSg vs Fn FnPgSg vs Fn FnPgSg vs FnPg FnSg vs FnPg FnPgSg vs FnSg Fn Coverage

| ORF                                                                                 | FnPg vs Fn |        |          |          | FnSg vs Fn |        |          |          | FnPgSg vs Fn |        |          |          | FnPgSg vs FnPg |        |          |          | FnSg vs FnPg |        |          |          | FnPgSg vs FnSg |        |          |          | Log <sub>2</sub> Ratios |     |       |       |    |    |    |   |   |   |   |  |
|-------------------------------------------------------------------------------------|------------|--------|----------|----------|------------|--------|----------|----------|--------------|--------|----------|----------|----------------|--------|----------|----------|--------------|--------|----------|----------|----------------|--------|----------|----------|-------------------------|-----|-------|-------|----|----|----|---|---|---|---|--|
|                                                                                     | Ratio      | Sum    | q-Val    | p-Val    | Ratio      | Sum    | q-Val    | p-Val    | Ratio        | Sum    | q-Val    | p-Val    | Ratio          | Sum    | q-Val    | p-Val    | Ratio        | Sum    | q-Val    | p-Val    | Ratio          | Sum    | q-Val    | p-Val    | Ratio                   | Sum | q-Val | p-Val | -6 | -4 | -2 | 0 | 2 | 4 | 6 |  |
| <b>FN0562</b>                                                                       | -0.332     | 13.764 | 6.792e-2 | 1.372e-1 | -0.432     | 13.848 | 6.443e-3 | 2.779e-2 | 0.267        | 14.159 | 8.121e-3 | 3.229e-2 | 0.599          | 14.030 | 1.887e-2 | 1.958e-2 | -0.100       | 13.516 | 3.412e-1 | 6.762e-1 | 0.699          | 14.114 | 1.092e-3 | 2.181e-3 |                         |     |       |       |    |    |    |   |   |   |   |  |
| AAL94758.1   Hypothetical cytosolic protein                                         |            |        |          |          |            |        |          |          |              |        |          |          |                |        |          |          |              |        |          |          |                |        |          |          |                         |     |       |       |    |    |    |   |   |   |   |  |
| <b>FN0563</b>                                                                       | -1.631     | 7.755  | 9.49e-3  | 1.066e-2 | -1.280     | 8.291  | 6.724e-8 | 3.251e-9 | -1.470       | 7.713  | 5.619e-4 | 1.157e-3 | 0.162          | 6.285  | 2.466e-1 | 7.849e-1 | 0.351        | 6.660  | 2.811e-1 | 5.104e-1 | -0.190         | 6.821  | 8.957e-2 | 4.256e-1 |                         |     |       |       |    |    |    |   |   |   |   |  |
| AAL94759.1   putative tRNA (5-methylaminomethyl-2-thiouridylate) -methyltransferase |            |        |          |          |            |        |          |          |              |        |          |          |                |        |          |          |              |        |          |          |                |        |          |          |                         |     |       |       |    |    |    |   |   |   |   |  |
| <b>FN0574</b>                                                                       |            |        |          |          |            |        |          |          | 0.236        | 3.764  |          |          |                |        |          |          |              |        |          |          |                |        |          |          |                         |     |       |       |    |    |    |   |   |   |   |  |
| AAL94770.1   Hypothetical cytosolic protein                                         |            |        |          |          |            |        |          |          |              |        |          |          |                |        |          |          |              |        |          |          |                |        |          |          |                         |     |       |       |    |    |    |   |   |   |   |  |
| <b>FN0576</b>                                                                       | -0.794     | 11.518 | 4.822e-3 | 4.344e-3 | 0.165      | 12.661 | 8.411e-2 | 4.88e-1  | -1.044       | 11.064 | 9.375e-4 | 2.199e-3 | -0.250         | 10.474 | 1.173e-1 | 2.812e-1 | 0.959        | 11.867 | 6.031e-2 | 3.168e-2 | -1.209         | 11.617 | 6.242e-3 | 1.987e-2 |                         |     |       |       |    |    |    |   |   |   |   |  |
| AAL94772.1   hypothetical protein                                                   |            |        |          |          |            |        |          |          |              |        |          |          |                |        |          |          |              |        |          |          |                |        |          |          |                         |     |       |       |    |    |    |   |   |   |   |  |
| <b>FN0577</b>                                                                       | 1.068      | 5.851  |          |          | 1.419      | 6.387  |          |          |              |        |          |          |                |        |          |          | 0.351        | 7.455  |          |          |                |        |          |          |                         |     |       |       |    |    |    |   |   |   |   |  |
| AAL94773.1   Hypothetical protein                                                   |            |        |          |          |            |        |          |          |              |        |          |          |                |        |          |          |              |        |          |          |                |        |          |          |                         |     |       |       |    |    |    |   |   |   |   |  |
| <b>FN0579</b>                                                                       | 1.502      | 18.883 | 2.34e-2  | 3.3e-2   | 0.552      | 18.117 | 1.224e-2 | 5.897e-2 | -0.091       | 17.086 | 9.155e-3 | 3.72e-2  | -1.593         | 18.792 | 2.565e-2 | 3.024e-2 | -0.950       | 19.619 | 8.566e-2 | 6.238e-2 | -0.643         | 18.026 | 1.183e-2 | 4.285e-2 |                         |     |       |       |    |    |    |   |   |   |   |  |
| AAL94775.1   Hypothetical cytosolic protein                                         |            |        |          |          |            |        |          |          |              |        |          |          |                |        |          |          |              |        |          |          |                |        |          |          |                         |     |       |       |    |    |    |   |   |   |   |  |
| <b>FN0580</b>                                                                       | -2.833     | 6.833  |          |          | -1.525     | 8.325  | 2.408e-4 | 4.815e-4 |              |        |          |          |                |        |          |          | 1.308        | 5.492  |          |          |                |        |          |          |                         |     |       |       |    |    |    |   |   |   |   |  |
| AAL94776.1   Penicillin-binding protein                                             |            |        |          |          |            |        |          |          |              |        |          |          |                |        |          |          |              |        |          |          |                |        |          |          |                         |     |       |       |    |    |    |   |   |   |   |  |
| <b>FN0581</b>                                                                       | -1.229     | 7.229  |          |          | -0.356     | 8.287  |          |          | -1.448       | 6.807  |          |          | -0.219         | 5.781  |          |          | 0.873        | 7.058  |          |          | -1.092         | 6.839  |          |          |                         |     |       |       |    |    |    |   |   |   |   |  |
| AAL94777.1   Lipoprotein releasing system transmembrane protein lolE                |            |        |          |          |            |        |          |          |              |        |          |          |                |        |          |          |              |        |          |          |                |        |          |          |                         |     |       |       |    |    |    |   |   |   |   |  |
| <b>FN0582</b>                                                                       | -1.440     | 9.780  |          |          | -0.387     | 11.018 | 1.503e-2 | 7.478e-2 | -1.230       | 9.787  | 1.291e-3 | 3.398e-3 | 0.210          | 8.550  |          |          | 1.053        | 9.578  |          |          | -0.843         | 9.788  | 7.256e-3 | 2.388e-2 |                         |     |       |       |    |    |    |   |   |   |   |  |
| AAL94778.1   Lipoprotein releasing system ATP-binding protein lolD                  |            |        |          |          |            |        |          |          |              |        |          |          |                |        |          |          |              |        |          |          |                |        |          |          |                         |     |       |       |    |    |    |   |   |   |   |  |
| <b>FN0583</b>                                                                       | 1.304      | 7.480  |          |          | 0.411      | 6.772  |          |          |              |        |          |          |                |        |          |          | -0.893       | 8.076  |          |          |                |        |          |          |                         |     |       |       |    |    |    |   |   |   |   |  |
| AAL94779.1   Hypothetical Exported Protein                                          |            |        |          |          |            |        |          |          |              |        |          |          |                |        |          |          |              |        |          |          |                |        |          |          |                         |     |       |       |    |    |    |   |   |   |   |  |
| <b>FN0585</b>                                                                       | 0.893      | 7.198  | 1.115e-1 | 2.601e-1 | 0.034      | 6.524  | 1.367e-1 | 8.413e-1 | -1.050       | 5.050  |          |          | -1.944         | 6.148  |          |          | -0.859       | 7.417  | 1.832e-1 | 2.703e-1 | -1.085         | 5.473  |          |          |                         |     |       |       |    |    |    |   |   |   |   |  |
| AAL94781.1   Two-component response regulator czcR                                  |            |        |          |          |            |        |          |          |              |        |          |          |                |        |          |          |              |        |          |          |                |        |          |          |                         |     |       |       |    |    |    |   |   |   |   |  |
| <b>FN0586</b>                                                                       | 0.879      | 6.522  |          |          | 0.459      | 6.286  | 5.033e-2 | 2.811e-1 | -0.720       | 4.720  |          |          | -1.599         | 5.802  |          |          | -0.420       | 7.165  |          |          | -1.178         | 5.567  |          |          |                         |     |       |       |    |    |    |   |   |   |   |  |
| AAL94782.1   Two-component sensor kinase czcS                                       |            |        |          |          |            |        |          |          |              |        |          |          |                |        |          |          |              |        |          |          |                |        |          |          |                         |     |       |       |    |    |    |   |   |   |   |  |
| <b>FN0590</b>                                                                       | 0.905      | 8.602  | 1.142e-1 | 2.679e-1 | 1.373      | 9.254  | 1.808e-3 | 6.042e-3 | -1.114       | 6.380  | 3.959e-3 | 1.375e-2 | -2.019         | 7.489  | 6.446e-2 | 1.154e-1 | 0.468        | 10.160 | 2.207e-1 | 3.614e-1 | -2.486         | 8.141  | 1.893e-3 | 4.316e-3 |                         |     |       |       |    |    |    |   |   |   |   |  |
| AAL94786.1   N-acyl-L-amino acid amidohydrolase                                     |            |        |          |          |            |        |          |          |              |        |          |          |                |        |          |          |              |        |          |          |                |        |          |          |                         |     |       |       |    |    |    |   |   |   |   |  |
| <b>FN0592</b>                                                                       | -0.593     | 12.849 | 8.665e-4 | 3.742e-4 | -0.258     | 13.368 | 5.754e-2 | 3.244e-1 | -0.765       | 12.472 | 9.214e-4 | 2.15e-3  | -0.173         | 12.083 | 1.066e-1 | 2.44e-1  | 0.335        | 12.775 | 1.947e-1 | 3.006e-1 | -0.508         | 12.602 | 3.992e-2 | 1.727e-1 |                         |     |       |       |    |    |    |   |   |   |   |  |
| AAL94788.1   ATP-dependent DNA helicase pcrA                                        |            |        |          |          |            |        |          |          |              |        |          |          |                |        |          |          |              |        |          |          |                |        |          |          |                         |     |       |       |    |    |    |   |   |   |   |  |
| <b>FN0593</b>                                                                       | -0.011     | 11.085 | 2.828e-1 | 8.792e-1 | -0.312     | 10.969 | 3.579e-3 | 1.403e-2 | 0.036        | 10.928 | 1.128e-1 | 6.434e-1 | 0.047          | 11.121 | 1.803e-1 | 5.145e-1 | -0.301       | 10.957 | 3.108e-2 | 9.699e-3 | 0.348          | 11.005 | 3.27e-3  | 8.556e-3 |                         |     |       |       |    |    |    |   |   |   |   |  |
| AAL94789.1   UDP-3-O-[3-hydroxymyristoyl] N-acetylglucosamine deacetylase           |            |        |          |          |            |        |          |          |              |        |          |          |                |        |          |          |              |        |          |          |                |        |          |          |                         |     |       |       |    |    |    |   |   |   |   |  |
| <b>FN0594</b>                                                                       | 4.420      | 10.596 |          |          | 3.705      | 10.066 |          |          | 0.014        | 5.986  |          |          | -4.406         | 10.610 |          |          | -0.715       | 14.485 |          |          | -3.691         | 10.080 |          |          |                         |     |       |       |    |    |    |   |   |   |   |  |
| AAL94790.1   (3R)-hydroxymyristoyl-[acyl carrier protein] dehydratase               |            |        |          |          |            |        |          |          |              |        |          |          |                |        |          |          |              |        |          |          |                |        |          |          |                         |     |       |       |    |    |    |   |   |   |   |  |
| <b>FN0595</b>                                                                       | 0.421      | 9.089  |          |          | -0.840     | 8.012  | 5.036e-5 | 6.152e-5 | 0.824        | 9.288  | 5.432e-2 | 2.84e-1  | 0.403          | 9.913  |          |          | -1.261       | 8.433  |          |          | 1.664          | 8.836  | 3.179e-2 | 1.33e-1  |                         |     |       |       |    |    |    |   |   |   |   |  |
| AAL94791.1   Acyl-[acyl-carrier-protein]-UDP-N-acetylglucosamine O-acyltransferase  |            |        |          |          |            |        |          |          |              |        |          |          |                |        |          |          |              |        |          |          |                |        |          |          |                         |     |       |       |    |    |    |   |   |   |   |  |

Show detected proteins only  
 Show all proteins  
 Filter by category:

Proteins found: 1424

Enter (or paste) list of ORFs

Find ORFs

Test Cutoff

q-Value .005

p-Value

Dot Plots

Dot Plots

| Signif | Direction | Applies To   |
|--------|-----------|--------------|
| yes    | +         | ratios, bars |
| no     | n/a       | bars         |
| yes    | -         | ratios, bars |
| yes    | +         | p-, q-Values |
| yes    | -         | p-, q-Values |

FnPg vs Fn —

FnPgSg vs Fn —

FnSg vs FnPg —

FnSg vs Fn —

FnPgSg vs FnPg —

FnPgSg vs FnSg —

Fn Summary Table

FnPg vs Fn

FnSg vs Fn

FnPgSg vs Fn

FnPgSg vs FnPg

FnSg vs FnPg

FnPgSg vs FnSg

Fn Coverage

| ORF                                                             | FnPg vs Fn |        |          |          | FnSg vs Fn |        |          |           | FnPgSg vs Fn |        |          |          | FnPgSg vs FnPg |        |          |          | FnSg vs FnPg |        |          |          | FnPgSg vs FnSg |        |          |          | Log <sub>2</sub> Ratios |     |       |       |    |    |    |   |   |   |   |  |
|-----------------------------------------------------------------|------------|--------|----------|----------|------------|--------|----------|-----------|--------------|--------|----------|----------|----------------|--------|----------|----------|--------------|--------|----------|----------|----------------|--------|----------|----------|-------------------------|-----|-------|-------|----|----|----|---|---|---|---|--|
|                                                                 | Ratio      | Sum    | q-Val    | p-Val    | Ratio      | Sum    | q-Val    | p-Val     | Ratio        | Sum    | q-Val    | p-Val    | Ratio          | Sum    | q-Val    | p-Val    | Ratio        | Sum    | q-Val    | p-Val    | Ratio          | Sum    | q-Val    | p-Val    | Ratio                   | Sum | q-Val | p-Val | -6 | -4 | -2 | 0 | 2 | 4 | 6 |  |
| <b>FN0596</b>                                                   | -0.887     | 9.143  | 1.623e-2 | 2.057e-2 | -0.667     | 9.548  | 3.358e-3 | 1.293e-2  | -1.328       | 8.498  |          |          | -0.441         | 7.815  |          |          | 0.221        | 8.661  | 2.788e-1 | 5.048e-1 | -0.661         | 8.220  |          |          |                         |     |       |       |    |    |    |   |   |   |   |  |
| AAL94792.1   Hypothetical protein                               |            |        |          |          |            |        |          |           |              |        |          |          |                |        |          |          |              |        |          |          |                |        |          |          |                         |     |       |       |    |    |    |   |   |   |   |  |
| <b>FN0597</b>                                                   | -0.057     | 10.396 | 2.393e-1 | 7.015e-1 | -0.322     | 10.315 | 2.133e-2 | 1.099e-1  | -1.240       | 9.009  | 1.167e-3 | 2.945e-3 | -1.184         | 9.156  | 2.985e-3 | 1.217e-3 | -0.266       | 10.258 | 1.98e-2  | 4.58e-3  | -0.918         | 9.075  | 1.111e-3 | 2.232e-3 |                         |     |       |       |    |    |    |   |   |   |   |  |
| AAL94793.1   Lipid-A-disaccharide synthase                      |            |        |          |          |            |        |          |           |              |        |          |          |                |        |          |          |              |        |          |          |                |        |          |          |                         |     |       |       |    |    |    |   |   |   |   |  |
| <b>FN0598</b>                                                   | -1.214     | 8.786  | 2.897e-3 | 2.133e-3 | -0.762     | 9.422  | 2.596e-3 | 9.369e-3  | -0.350       | 9.446  | 1.566e-2 | 6.843e-2 | 0.864          | 8.436  | 1.403e-2 | 1.267e-2 | 0.452        | 8.208  | 1.233e-1 | 1.26e-1  | 0.412          | 9.072  | 2.045e-3 | 4.748e-3 |                         |     |       |       |    |    |    |   |   |   |   |  |
| AAL94794.1   Phospholipid-lipopolysaccharide ABC transporter    |            |        |          |          |            |        |          |           |              |        |          |          |                |        |          |          |              |        |          |          |                |        |          |          |                         |     |       |       |    |    |    |   |   |   |   |  |
| <b>FN0600</b>                                                   | -0.134     | 12.447 | 2.673e-1 | 8.134e-1 | -0.004     | 12.761 | 1.483e-1 | 9.256e-1  | 0.162        | 12.539 | 5.949e-2 | 3.142e-1 | 0.296          | 12.609 | 2.003e-1 | 5.977e-1 | 0.130        | 12.627 | 3.857e-1 | 8.196e-1 | 0.166          | 12.923 | 6.675e-2 | 3.078e-1 |                         |     |       |       |    |    |    |   |   |   |   |  |
| AAL94796.1   Hypothetical protein                               |            |        |          |          |            |        |          |           |              |        |          |          |                |        |          |          |              |        |          |          |                |        |          |          |                         |     |       |       |    |    |    |   |   |   |   |  |
| <b>FN0601</b>                                                   |            |        |          |          |            |        |          |           |              |        |          |          |                |        |          |          |              |        |          |          |                |        |          |          |                         |     |       |       |    |    |    |   |   |   |   |  |
| AAL94797.1   Hypothetical exported 24-amino acid repeat protein |            |        |          |          |            |        |          |           |              |        |          |          |                |        |          |          |              |        |          |          |                |        |          |          |                         |     |       |       |    |    |    |   |   |   |   |  |
| <b>FN0602</b>                                                   | -0.450     | 14.400 | 1.856e-2 | 2.459e-2 | -1.050     | 13.985 | 1.203e-5 | 7.965e-6  | -0.483       | 14.163 | 1.868e-4 | 2.623e-4 | -0.033         | 13.917 | 2.575e-1 | 8.315e-1 | -0.600       | 13.535 | 6.163e-2 | 3.287e-2 | 0.567          | 13.502 | 1.503e-4 | 1.489e-4 |                         |     |       |       |    |    |    |   |   |   |   |  |
| AAL94798.1   Hypothetical protein                               |            |        |          |          |            |        |          |           |              |        |          |          |                |        |          |          |              |        |          |          |                |        |          |          |                         |     |       |       |    |    |    |   |   |   |   |  |
| <b>FN0603</b>                                                   | 0.608      | 5.392  |          |          | 1.234      | 6.202  |          |           |              |        |          |          |                |        |          |          | 0.626        | 6.810  |          |          |                |        |          |          |                         |     |       |       |    |    |    |   |   |   |   |  |
| AAL94799.1   Transcriptional regulatory protein, LYSR family    |            |        |          |          |            |        |          |           |              |        |          |          |                |        |          |          |              |        |          |          |                |        |          |          |                         |     |       |       |    |    |    |   |   |   |   |  |
| <b>FN0605</b>                                                   |            |        |          |          |            |        |          |           |              |        |          |          |                |        |          |          |              |        |          |          |                |        |          |          |                         |     |       |       |    |    |    |   |   |   |   |  |
| AAL94801.1   Aspartate aminotransferase                         |            |        |          |          |            |        |          |           |              |        |          |          |                |        |          |          |              |        |          |          |                |        |          |          |                         |     |       |       |    |    |    |   |   |   |   |  |
| <b>FN0608</b>                                                   | 1.321      | 12.367 | 3.34e-2  | 5.204e-2 | 1.631      | 12.861 | 3.087e-8 | 6.398e-10 | 0.080        | 10.922 | 2.224e-2 | 1.017e-1 | -1.241         | 12.447 | 3.975e-2 | 5.704e-2 | 0.310        | 14.182 | 1.945e-1 | 2.999e-1 | -1.551         | 12.941 | 4.05e-8  | 1.022e-9 |                         |     |       |       |    |    |    |   |   |   |   |  |
| AAL94804.1   Exoribonuclease II                                 |            |        |          |          |            |        |          |           |              |        |          |          |                |        |          |          |              |        |          |          |                |        |          |          |                         |     |       |       |    |    |    |   |   |   |   |  |
| <b>FN0609</b>                                                   |            |        |          |          |            |        |          |           |              |        |          |          |                |        |          |          | 0.782        | 6.137  |          |          |                |        |          |          |                         |     |       |       |    |    |    |   |   |   |   |  |
| AAL94805.1   Small protein B                                    |            |        |          |          |            |        |          |           |              |        |          |          |                |        |          |          |              |        |          |          |                |        |          |          |                         |     |       |       |    |    |    |   |   |   |   |  |
| <b>FN0610</b>                                                   | -0.386     | 15.997 | 1.266e-1 | 3.055e-1 | -0.706     | 15.862 | 7.534e-6 | 3.747e-6  | -0.543       | 15.636 | 2.075e-4 | 3.071e-4 | -0.157         | 15.454 | 2.281e-1 | 7.085e-1 | -0.320       | 15.476 | 2.7e-1   | 4.828e-1 | 0.163          | 15.319 | 2.146e-2 | 8.568e-2 |                         |     |       |       |    |    |    |   |   |   |   |  |
| AAL94806.1   unknown                                            |            |        |          |          |            |        |          |           |              |        |          |          |                |        |          |          |              |        |          |          |                |        |          |          |                         |     |       |       |    |    |    |   |   |   |   |  |
| <b>FN0611</b>                                                   | 0.008      | 18.655 | 2.588e-1 | 7.784e-1 | 0.328      | 19.160 | 3.215e-3 | 1.223e-2  | -0.494       | 17.949 | 1.756e-3 | 5.151e-3 | -0.502         | 18.161 | 8.272e-3 | 5.665e-3 | 0.320        | 19.168 | 3.881e-2 | 1.429e-2 | -0.822         | 18.665 | 2.054e-4 | 2.268e-4 |                         |     |       |       |    |    |    |   |   |   |   |  |
| AAL94807.1   Threonyl-tRNA synthetase                           |            |        |          |          |            |        |          |           |              |        |          |          |                |        |          |          |              |        |          |          |                |        |          |          |                         |     |       |       |    |    |    |   |   |   |   |  |
| <b>FN0612</b>                                                   | -1.943     | 12.544 | 1.296e-3 | 7.08e-4  | -1.557     | 13.116 | 7.648e-4 | 2.154e-3  | -0.449       | 13.835 | 3.803e-2 | 1.897e-1 | 1.495          | 12.095 | 3.393e-2 | 4.572e-2 | 0.387        | 11.172 | 2.415e-1 | 4.143e-1 | 1.108          | 12.667 | 2.04e-2  | 8.069e-2 |                         |     |       |       |    |    |    |   |   |   |   |  |
| AAL94808.1   Hypothetical protein                               |            |        |          |          |            |        |          |           |              |        |          |          |                |        |          |          |              |        |          |          |                |        |          |          |                         |     |       |       |    |    |    |   |   |   |   |  |
| <b>FN0614</b>                                                   |            |        |          |          |            |        |          |           |              |        |          |          |                |        |          |          |              |        |          |          |                |        |          |          |                         |     |       |       |    |    |    |   |   |   |   |  |
| AAL94810.1   Export ABC transporter                             |            |        |          |          |            |        |          |           |              |        |          |          |                |        |          |          |              |        |          |          |                |        |          |          |                         |     |       |       |    |    |    |   |   |   |   |  |
| <b>FN0615</b>                                                   |            |        |          |          |            |        |          |           |              |        |          |          |                |        |          |          |              |        |          |          |                |        |          |          |                         |     |       |       |    |    |    |   |   |   |   |  |
| AAL94811.1   Export ABC transporter                             |            |        |          |          |            |        |          |           |              |        |          |          |                |        |          |          |              |        |          |          |                |        |          |          |                         |     |       |       |    |    |    |   |   |   |   |  |
| <b>FN0616</b>                                                   | -3.077     | 8.692  |          |          |            |        |          |           | -0.494       | 11.072 | 1.783e-2 | 7.93e-2  | 2.583          | 8.198  |          |          |              |        |          |          |                |        |          |          |                         |     |       |       |    |    |    |   |   |   |   |  |
| AAL94812.1   Hypothetical protein                               |            |        |          |          |            |        |          |           |              |        |          |          |                |        |          |          |              |        |          |          |                |        |          |          |                         |     |       |       |    |    |    |   |   |   |   |  |
| <b>FN0617</b>                                                   | 0.513      | 16.384 | 1.465e-1 | 3.681e-1 | -1.376     | 14.679 | 5.643e-6 | 2.319e-6  | -0.472       | 15.195 | 9.75e-5  | 1.048e-4 | -0.985         | 15.912 | 8.778e-2 | 1.788e-1 | -1.889       | 15.192 | 9.783e-2 | 8.183e-2 | 0.904          | 14.207 | 8.709e-6 | 2.273e-6 |                         |     |       |       |    |    |    |   |   |   |   |  |
| AAL94813.1   DNA polymerase III, beta chain                     |            |        |          |          |            |        |          |           |              |        |          |          |                |        |          |          |              |        |          |          |                |        |          |          |                         |     |       |       |    |    |    |   |   |   |   |  |

Show detected proteins only  
 Show all proteins  
 Filter by category:

Proteins found: 1424

Enter (or paste) list of ORFs

Find ORFs

Test Cutoff

q-Value .005

p-Value

Dot Plots

| Signif | Direction | Applies To   |
|--------|-----------|--------------|
| yes    | +         | ratios, bars |
| no     | n/a       | bars         |
| yes    | -         | ratios, bars |
| yes    | +         | p-, q-Values |
| yes    | -         | p-, q-Values |

FnPg vs Fn █ █ FnSg vs Fn  
 FnPgSg vs Fn █ █ FnPgSg vs FnPg  
 FnSg vs FnPg █ █ FnPgSg vs FnSg



Fn Summary Table

FnPg vs Fn

FnSg vs Fn

FnPgSg vs Fn

FnPgSg vs FnPg

FnSg vs FnPg

FnPgSg vs FnSg

Fn Coverage

| ORF                                                                           | FnPg vs Fn |        |          |          | FnSg vs Fn |        |          |          | FnPgSg vs Fn |        |          |          | FnPgSg vs FnPg |        |          |          | FnSg vs FnPg |        |          |          | FnPgSg vs FnSg |        |          |          | Log <sub>2</sub> Ratios |     |       |       |    |    |    |   |   |   |   |  |
|-------------------------------------------------------------------------------|------------|--------|----------|----------|------------|--------|----------|----------|--------------|--------|----------|----------|----------------|--------|----------|----------|--------------|--------|----------|----------|----------------|--------|----------|----------|-------------------------|-----|-------|-------|----|----|----|---|---|---|---|--|
|                                                                               | Ratio      | Sum    | q-Val    | p-Val    | Ratio      | Sum    | q-Val    | p-Val    | Ratio        | Sum    | q-Val    | p-Val    | Ratio          | Sum    | q-Val    | p-Val    | Ratio        | Sum    | q-Val    | p-Val    | Ratio          | Sum    | q-Val    | p-Val    | Ratio                   | Sum | q-Val | p-Val | -6 | -4 | -2 | 0 | 2 | 4 | 6 |  |
| <b>FN0618</b>                                                                 | -0.465     | 14.090 | 1.212e-1 | 2.89e-2  | -0.791     | 13.948 | 2.997e-3 | 1.121e-2 | -1.074       | 13.277 | 4.123e-5 | 3.105e-5 | -0.609         | 13.016 | 1.303e-1 | 3.288e-1 | -0.326       | 13.483 | 2.987e-1 | 5.562e-1 | -0.283         | 12.874 | 5.864e-2 | 2.664e-1 |                         |     |       |       |    |    |    |   |   |   |   |  |
| AAL94814.1   Spermidine/putrescine-binding protein                            |            |        |          |          |            |        |          |          |              |        |          |          |                |        |          |          |              |        |          |          |                |        |          |          |                         |     |       |       |    |    |    |   |   |   |   |  |
| <b>FN0619</b>                                                                 | -1.035     | 8.489  | 3.386e-2 | 5.301e-2 | -1.120     | 8.589  | 4.304e-4 | 1.011e-3 | -0.843       | 8.477  |          |          | 0.192          | 7.646  |          |          | -0.085       | 7.554  | 4.027e-1 | 8.801e-1 | 0.277          | 7.746  |          |          |                         |     |       |       |    |    |    |   |   |   |   |  |
| AAL94815.1   Small-conductance mechanosensitive channel                       |            |        |          |          |            |        |          |          |              |        |          |          |                |        |          |          |              |        |          |          |                |        |          |          |                         |     |       |       |    |    |    |   |   |   |   |  |
| <b>FN0621</b>                                                                 | -0.074     | 11.610 | 2.679e-1 | 8.158e-1 | -0.505     | 11.363 | 2.115e-3 | 7.286e-3 | 0.032        | 11.512 | 1.478e-1 | 8.778e-1 | 0.106          | 11.642 | 2.437e-1 | 7.723e-1 | -0.431       | 11.289 | 1.955e-1 | 3.027e-1 | 0.537          | 11.395 | 2.307e-2 | 9.287e-2 |                         |     |       |       |    |    |    |   |   |   |   |  |
| AAL94817.1   4-hydroxybutyrate coenzyme A transferase                         |            |        |          |          |            |        |          |          |              |        |          |          |                |        |          |          |              |        |          |          |                |        |          |          |                         |     |       |       |    |    |    |   |   |   |   |  |
| <b>FN0622</b>                                                                 | 2.520      | 7.838  | 4.561e-2 | 7.908e-2 | 3.782      | 9.284  | 1.265e-3 | 3.955e-3 | -0.586       | 4.529  | 1.697e-4 | 2.285e-4 | -3.105         | 7.252  | 4.485e-2 | 6.767e-2 | 1.262        | 11.804 | 4.144e-2 | 1.602e-2 | -4.367         | 8.699  | 1.66e-3  | 3.674e-3 |                         |     |       |       |    |    |    |   |   |   |   |  |
| AAL94818.1   8-oxoguanine DNA glycosylase                                     |            |        |          |          |            |        |          |          |              |        |          |          |                |        |          |          |              |        |          |          |                |        |          |          |                         |     |       |       |    |    |    |   |   |   |   |  |
| <b>FN0625</b>                                                                 | -0.443     | 9.165  |          |          | -0.989     | 8.803  |          |          | 0.628        | 10.033 | 2.237e-2 | 1.024e-1 | 1.071          | 9.793  |          |          | -0.547       | 8.360  |          |          | 1.618          | 9.431  |          |          |                         |     |       |       |    |    |    |   |   |   |   |  |
| AAL94821.1   Aspartate aminotransferase                                       |            |        |          |          |            |        |          |          |              |        |          |          |                |        |          |          |              |        |          |          |                |        |          |          |                         |     |       |       |    |    |    |   |   |   |   |  |
| <b>FN0626</b>                                                                 |            |        |          |          |            |        |          |          |              |        |          |          |                |        |          |          |              |        |          |          |                |        |          |          |                         |     |       |       |    |    |    |   |   |   |   |  |
| AAL94822.1   Hypothetical cytosolic protein                                   |            |        |          |          |            |        |          |          |              |        |          |          |                |        |          |          |              |        |          |          |                |        |          |          |                         |     |       |       |    |    |    |   |   |   |   |  |
| <b>FN0627</b>                                                                 | -1.099     | 14.249 | 1.614e-2 | 2.042e-2 | -0.867     | 14.665 | 2.127e-4 | 4.124e-4 | 0.549        | 15.693 | 1.368e-4 | 1.7e-4   | 1.648          | 14.798 | 6.612e-3 | 3.834e-3 | 0.231        | 13.566 | 3.026e-1 | 5.665e-1 | 1.417          | 15.214 | 4.805e-7 | 4.851e-8 |                         |     |       |       |    |    |    |   |   |   |   |  |
| AAL94823.1   Glucosamine--fructose-6-phosphate aminotransferase (isomerizing) |            |        |          |          |            |        |          |          |              |        |          |          |                |        |          |          |              |        |          |          |                |        |          |          |                         |     |       |       |    |    |    |   |   |   |   |  |
| <b>FN0628</b>                                                                 |            |        |          |          | -0.018     | 5.529  | 1.536e-1 | 9.644e-1 | 1.666        | 6.825  | 6.355e-4 | 1.355e-3 |                |        |          |          |              |        |          |          | 1.684          | 7.195  | 1.338e-4 | 1.266e-4 |                         |     |       |       |    |    |    |   |   |   |   |  |
| AAL94824.1   Glucosamine--fructose-6-phosphate aminotransferase (isomerizing) |            |        |          |          |            |        |          |          |              |        |          |          |                |        |          |          |              |        |          |          |                |        |          |          |                         |     |       |       |    |    |    |   |   |   |   |  |
| <b>FN0629</b>                                                                 | -0.251     | 8.251  |          |          | 0.344      | 9.031  | 4.925e-2 | 2.745e-1 | 1.101        | 9.400  | 3.787e-4 | 6.97e-4  | 1.353          | 9.353  |          |          | 0.595        | 8.780  |          |          | 0.757          | 10.133 | 5.895e-3 | 1.853e-2 |                         |     |       |       |    |    |    |   |   |   |   |  |
| AAL94825.1   PTS system, IID component                                        |            |        |          |          |            |        |          |          |              |        |          |          |                |        |          |          |              |        |          |          |                |        |          |          |                         |     |       |       |    |    |    |   |   |   |   |  |
| <b>FN0630</b>                                                                 |            |        |          |          |            |        |          |          | 0.839        | 8.337  |          |          |                |        |          |          |              |        |          |          |                |        |          |          |                         |     |       |       |    |    |    |   |   |   |   |  |
| AAL94826.1   PTS system, IIC component                                        |            |        |          |          |            |        |          |          |              |        |          |          |                |        |          |          |              |        |          |          |                |        |          |          |                         |     |       |       |    |    |    |   |   |   |   |  |
| <b>FN0631</b>                                                                 | -0.334     | 8.509  |          |          | -0.404     | 8.623  | 5.102e-3 | 2.117e-2 | -0.712       | 7.927  | 6.122e-3 | 2.322e-2 | -0.378         | 7.797  |          |          | -0.070       | 8.289  |          |          | -0.308         | 7.911  | 5.295e-2 | 2.379e-1 |                         |     |       |       |    |    |    |   |   |   |   |  |
| AAL94827.1   PTS system, IIB component                                        |            |        |          |          |            |        |          |          |              |        |          |          |                |        |          |          |              |        |          |          |                |        |          |          |                         |     |       |       |    |    |    |   |   |   |   |  |
| <b>FN0633</b>                                                                 | 0.570      | 7.244  |          |          | 0.057      | 6.916  | 7.709e-2 | 4.439e-1 | -0.507       | 5.963  | 5.275e-2 | 2.747e-1 | -1.077         | 6.737  |          |          | -0.513       | 7.485  |          |          | -0.564         | 6.408  | 5.091e-2 | 2.275e-1 |                         |     |       |       |    |    |    |   |   |   |   |  |
| AAL94829.1   Replication protein                                              |            |        |          |          |            |        |          |          |              |        |          |          |                |        |          |          |              |        |          |          |                |        |          |          |                         |     |       |       |    |    |    |   |   |   |   |  |
| <b>FN0634</b>                                                                 | -0.481     | 14.010 | 1.474e-1 | 3.711e-1 | -2.139     | 12.536 | 1.339e-4 | 2.301e-4 | -0.464       | 13.823 | 1.253e-3 | 3.257e-3 | 0.016          | 13.546 | 2.897e-1 | 9.78e-1  | -1.658       | 12.056 | 1.414e-1 | 1.665e-1 | 1.675          | 12.072 | 3.101e-5 | 1.7e-5   |                         |     |       |       |    |    |    |   |   |   |   |  |
| AAL94830.1   GTP-binding protein TypA/BipA                                    |            |        |          |          |            |        |          |          |              |        |          |          |                |        |          |          |              |        |          |          |                |        |          |          |                         |     |       |       |    |    |    |   |   |   |   |  |
| <b>FN0636</b>                                                                 |            |        |          |          |            |        |          |          |              |        |          |          |                |        |          |          |              |        |          |          |                |        |          |          |                         |     |       |       |    |    |    |   |   |   |   |  |
| AAL94832.1   Hypothetical protein                                             |            |        |          |          |            |        |          |          |              |        |          |          |                |        |          |          |              |        |          |          |                |        |          |          |                         |     |       |       |    |    |    |   |   |   |   |  |
| <b>FN0637</b>                                                                 |            |        |          |          |            |        |          |          | -0.561       | 5.319  | 7.934e-3 | 3.142e-2 |                |        |          |          |              |        |          |          |                |        |          |          |                         |     |       |       |    |    |    |   |   |   |   |  |
| AAL94833.1   Hypothetical exported 24-amino acid repeat protein               |            |        |          |          |            |        |          |          |              |        |          |          |                |        |          |          |              |        |          |          |                |        |          |          |                         |     |       |       |    |    |    |   |   |   |   |  |
| <b>FN0643</b>                                                                 | 0.764      | 9.037  | 6.087e-2 | 1.184e-1 | 0.129      | 8.587  | 1.19e-1  | 7.175e-1 | -0.252       | 7.818  | 3.311e-2 | 1.615e-1 | -1.016         | 8.785  | 4.744e-2 | 7.347e-2 | -0.635       | 9.351  | 1.48e-1  | 1.846e-1 | -0.381         | 8.335  | 7.704e-2 | 3.611e-1 |                         |     |       |       |    |    |    |   |   |   |   |  |
| AAL94839.1   hypothetical DNA-binding protein                                 |            |        |          |          |            |        |          |          |              |        |          |          |                |        |          |          |              |        |          |          |                |        |          |          |                         |     |       |       |    |    |    |   |   |   |   |  |
| <b>FN0644</b>                                                                 | -0.006     | 11.352 | 2.955e-1 | 9.351e-1 | -0.635     | 10.907 | 3.776e-3 | 1.502e-2 | -0.400       | 10.754 | 3.796e-2 | 1.893e-1 | -0.395         | 10.952 | 9.26e-2  | 1.941e-1 | -0.629       | 10.902 | 4.995e-2 | 2.264e-2 | 0.235          | 10.507 | 1.079e-1 | 5.229e-1 |                         |     |       |       |    |    |    |   |   |   |   |  |
| AAL94840.1   Uroporphyrin-III C-methyltransferase                             |            |        |          |          |            |        |          |          |              |        |          |          |                |        |          |          |              |        |          |          |                |        |          |          |                         |     |       |       |    |    |    |   |   |   |   |  |

Show detected proteins only  
 Show all proteins

Filter by category:

GO: amino acid transport

Proteins found:  
1424

Enter (or paste) list of ORFs

Find ORFs

Test

q-Value

p-Value

Cutoff

.005

Dot Plots

Dot Plots

| Signif | Direction | Applies To   |
|--------|-----------|--------------|
| yes    | +         | ratios, bars |
| no     | n/a       | bars         |
| yes    | -         | ratios, bars |
| yes    | +         | p-, q-Values |
| yes    | -         | p-, q-Values |

FnPg vs Fn — █ — FnSg vs Fn  
FnPgSg vs Fn — █ — FnPgSg vs FnPg  
FnSg vs FnPg — █ — FnPgSg vs FnSg

Fn Summary Table

FnPg vs Fn

FnSg vs Fn

FnPgSg vs Fn

FnPgSg vs FnPg

FnSg vs FnPg

FnPgSg vs FnSg

Fn Coverage

| ORF           | FnPg vs Fn                                                           |        |          |          | FnSg vs Fn |        |          |          | FnPgSg vs Fn |        |          |          | FnPgSg vs FnPg |        |          |          | FnSg vs FnPg |        |          |          | FnPgSg vs FnSg |        |          |          | Log <sub>2</sub> Ratios |     |       |       |    |    |    |   |   |   |   |  |
|---------------|----------------------------------------------------------------------|--------|----------|----------|------------|--------|----------|----------|--------------|--------|----------|----------|----------------|--------|----------|----------|--------------|--------|----------|----------|----------------|--------|----------|----------|-------------------------|-----|-------|-------|----|----|----|---|---|---|---|--|
|               | Ratio                                                                | Sum    | q-Val    | p-Val    | Ratio      | Sum    | q-Val    | p-Val    | Ratio        | Sum    | q-Val    | p-Val    | Ratio          | Sum    | q-Val    | p-Val    | Ratio        | Sum    | q-Val    | p-Val    | Ratio          | Sum    | q-Val    | p-Val    | Ratio                   | Sum | q-Val | p-Val | -6 | -4 | -2 | 0 | 2 | 4 | 6 |  |
| <b>FN0645</b> | -0.441                                                               | 6.247  | 1.22e-1  | 2.915e-1 | -0.851     | 6.021  |          |          | -0.577       | 5.907  | 9.526e-3 | 3.902e-2 | -0.136         | 5.670  | 2.437e-1 | 7.726e-1 | -0.410       | 5.580  |          |          | 0.275          | 5.444  |          |          |                         |     |       |       |    |    |    |   |   |   |   |  |
|               | AAL94841.1   Porphobilinogen deaminase                               |        |          |          |            |        |          |          |              |        |          |          |                |        |          |          |              |        |          |          |                |        |          |          |                         |     |       |       |    |    |    |   |   |   |   |  |
| <b>FN0646</b> |                                                                      |        |          |          |            |        |          |          |              |        |          |          |                |        |          |          |              |        |          |          | 2.069          | 5.239  |          |          |                         |     |       |       |    |    |    |   |   |   |   |  |
|               | AAL94842.1   Glutamyl-tRNA reductase                                 |        |          |          |            |        |          |          |              |        |          |          |                |        |          |          |              |        |          |          |                |        |          |          |                         |     |       |       |    |    |    |   |   |   |   |  |
| <b>FN0647</b> |                                                                      |        |          |          |            |        |          |          |              |        |          |          |                |        |          |          |              |        |          |          |                |        |          |          |                         |     |       |       |    |    |    |   |   |   |   |  |
|               | AAL94843.1   transcriptional regulator                               |        |          |          |            |        |          |          |              |        |          |          |                |        |          |          |              |        |          |          |                |        |          |          |                         |     |       |       |    |    |    |   |   |   |   |  |
| <b>FN0649</b> |                                                                      |        |          |          |            |        |          |          |              |        |          |          |                |        |          |          |              |        |          |          |                |        |          |          |                         |     |       |       |    |    |    |   |   |   |   |  |
|               | AAL94845.1   Exoenzymes regulatory protein aepA precursor            |        |          |          |            |        |          |          |              |        |          |          |                |        |          |          |              |        |          |          |                |        |          |          |                         |     |       |       |    |    |    |   |   |   |   |  |
| <b>FN0651</b> |                                                                      |        |          |          |            |        |          |          |              |        |          |          |                |        |          |          |              |        |          |          |                |        |          |          |                         |     |       |       |    |    |    |   |   |   |   |  |
|               | AAL94847.1   Ribosomal large subunit pseudouridine synthase D        |        |          |          |            |        |          |          |              |        |          |          |                |        |          |          |              |        |          |          |                |        |          |          |                         |     |       |       |    |    |    |   |   |   |   |  |
| <b>FN0652</b> | 1.042                                                                | 23.635 | 5.399e-2 | 9.959e-2 | 1.685      | 24.463 | 5.153e-4 | 1.277e-3 | -0.162       | 22.228 | 2.716e-2 | 1.279e-1 | -1.204         | 23.474 | 5.014e-2 | 7.989e-2 | 0.643        | 25.505 | 9.371e-2 | 7.596e-2 | -1.847         | 24.301 | 4.383e-4 | 6.266e-4 |                         |     |       |       |    |    |    |   |   |   |   |  |
|               | AAL94848.1   Glyceraldehyde 3-phosphate dehydrogenase                |        |          |          |            |        |          |          |              |        |          |          |                |        |          |          |              |        |          |          |                |        |          |          |                         |     |       |       |    |    |    |   |   |   |   |  |
| <b>FN0653</b> | 0.280                                                                | 11.739 | 1.59e-1  | 4.101e-1 | 0.939      | 12.582 | 4.025e-3 | 1.62e-2  | -1.204       | 10.051 | 6.921e-4 | 1.509e-3 | -1.484         | 10.535 | 2.845e-2 | 3.52e-2  | 0.659        | 12.862 | 8.06e-2  | 5.492e-2 | -2.143         | 11.378 | 1.208e-3 | 2.477e-3 |                         |     |       |       |    |    |    |   |   |   |   |  |
|               | AAL94849.1   unknown                                                 |        |          |          |            |        |          |          |              |        |          |          |                |        |          |          |              |        |          |          |                |        |          |          |                         |     |       |       |    |    |    |   |   |   |   |  |
| <b>FN0654</b> | -0.077                                                               | 18.744 | 2.383e-1 | 6.975e-1 | 0.924      | 19.929 | 7.066e-4 | 1.93e-3  | -0.605       | 18.012 | 6.725e-4 | 1.457e-3 | -0.528         | 18.139 | 5.338e-2 | 8.806e-2 | 1.001        | 19.852 | 7.062e-3 | 1.02e-3  | -1.529         | 19.324 | 2.485e-4 | 2.983e-4 |                         |     |       |       |    |    |    |   |   |   |   |  |
|               | AAL94850.1   Phosphoglycerate kinase                                 |        |          |          |            |        |          |          |              |        |          |          |                |        |          |          |              |        |          |          |                |        |          |          |                         |     |       |       |    |    |    |   |   |   |   |  |
| <b>FN0655</b> | -2.886                                                               | 9.805  |          |          | -2.362     | 10.514 | 8.012e-4 | 2.282e-3 | -0.599       | 11.889 | 1.606e-2 | 7.04e-2  | 2.287          | 9.206  |          |          | 0.524        | 7.628  |          |          | 1.763          | 9.915  | 4.916e-3 | 1.47e-2  |                         |     |       |       |    |    |    |   |   |   |   |  |
|               | AAL94851.1   unknown                                                 |        |          |          |            |        |          |          |              |        |          |          |                |        |          |          |              |        |          |          |                |        |          |          |                         |     |       |       |    |    |    |   |   |   |   |  |
| <b>FN0656</b> |                                                                      |        |          |          |            |        |          |          | -1.318       | 11.420 | 1.331e-3 | 3.554e-3 |                |        |          |          |              |        |          |          |                |        |          |          |                         |     |       |       |    |    |    |   |   |   |   |  |
|               | AAL94852.1   Hypothetical protein                                    |        |          |          |            |        |          |          |              |        |          |          |                |        |          |          |              |        |          |          |                |        |          |          |                         |     |       |       |    |    |    |   |   |   |   |  |
| <b>FN0657</b> | 1.009                                                                | 7.910  |          |          | 2.260      | 9.346  |          |          |              |        |          |          |                |        |          |          | 1.251        | 10.355 |          |          |                |        |          |          |                         |     |       |       |    |    |    |   |   |   |   |  |
|               | AAL94853.1   Acetyltransferase                                       |        |          |          |            |        |          |          |              |        |          |          |                |        |          |          |              |        |          |          |                |        |          |          |                         |     |       |       |    |    |    |   |   |   |   |  |
| <b>FN0658</b> | -1.362                                                               | 13.326 | 3.023e-4 | 7.136e-5 | -1.617     | 13.256 | 5.919e-5 | 7.705e-5 | 0.052        | 14.536 | 4.079e-2 | 2.059e-1 | 1.414          | 13.378 | 1.064e-6 | 1.419e-8 | -0.254       | 11.894 | 2.477e-3 | 1.78e-4  | 1.668          | 13.308 | 4.392e-6 | 8.367e-7 |                         |     |       |       |    |    |    |   |   |   |   |  |
|               | AAL94854.1   ABC transporter substrate-binding protein               |        |          |          |            |        |          |          |              |        |          |          |                |        |          |          |              |        |          |          |                |        |          |          |                         |     |       |       |    |    |    |   |   |   |   |  |
| <b>FN0660</b> | -0.313                                                               | 7.005  | 6.954e-2 | 1.414e-1 | -0.733     | 6.770  | 1.002e-2 | 4.685e-2 | -0.653       | 6.461  | 3.459e-3 | 1.168e-2 | -0.340         | 6.351  | 1.009e-1 | 2.225e-1 | -0.419       | 6.456  | 1.751e-1 | 2.506e-1 | 0.080          | 6.117  | 1.598e-1 | 8.224e-1 |                         |     |       |       |    |    |    |   |   |   |   |  |
|               | AAL94856.1   ABC transporter ATP-binding protein                     |        |          |          |            |        |          |          |              |        |          |          |                |        |          |          |              |        |          |          |                |        |          |          |                         |     |       |       |    |    |    |   |   |   |   |  |
| <b>FN0662</b> | 0.384                                                                | 11.041 | 2.322e-1 | 6.744e-1 | 0.581      | 11.423 | 6.587e-4 | 1.756e-3 | 0.263        | 10.716 | 1.425e-2 | 6.149e-2 | -0.121         | 11.303 | 2.691e-1 | 8.829e-1 | 0.198        | 11.806 | 3.768e-1 | 7.893e-1 | -0.318         | 11.685 | 2.059e-3 | 4.791e-3 |                         |     |       |       |    |    |    |   |   |   |   |  |
|               | AAL94858.1   Formiminoglutamase                                      |        |          |          |            |        |          |          |              |        |          |          |                |        |          |          |              |        |          |          |                |        |          |          |                         |     |       |       |    |    |    |   |   |   |   |  |
| <b>FN0664</b> | -1.329                                                               | 13.462 | 7.1e-3   | 7.367e-3 | -0.313     | 14.662 | 9.048e-2 | 5.286e-1 | -0.587       | 14.000 | 2.851e-3 | 9.277e-3 | 0.742          | 12.874 | 5.797e-2 | 9.97e-2  | 1.016        | 13.333 | 1.705e-1 | 2.394e-1 | -0.274         | 14.075 | 1.307e-1 | 6.503e-1 |                         |     |       |       |    |    |    |   |   |   |   |  |
|               | AAL94860.1   2-nitropropane dioxygenase                              |        |          |          |            |        |          |          |              |        |          |          |                |        |          |          |              |        |          |          |                |        |          |          |                         |     |       |       |    |    |    |   |   |   |   |  |
| <b>FN0666</b> |                                                                      |        |          |          | -1.071     | 6.290  | 1.61e-4  | 2.956e-4 |              |        |          |          |                |        |          |          |              |        |          |          |                |        |          |          |                         |     |       |       |    |    |    |   |   |   |   |  |
|               | AAL94862.1   Hypothetical protein                                    |        |          |          |            |        |          |          |              |        |          |          |                |        |          |          |              |        |          |          |                |        |          |          |                         |     |       |       |    |    |    |   |   |   |   |  |
| <b>FN0668</b> | -0.885                                                               | 9.350  | 3.602e-2 | 5.742e-2 | -0.869     | 9.550  | 1.004e-6 | 1.511e-7 | -1.596       | 8.436  | 1.109e-3 | 2.747e-3 | -0.710         | 7.754  | 1.171e-1 | 2.803e-1 | 0.016        | 8.665  | 4.265e-1 | 9.708e-1 | -0.727         | 7.955  | 1.69e-2  | 6.487e-2 |                         |     |       |       |    |    |    |   |   |   |   |  |
|               | AAL94864.1   High-affinity zinc uptake system protein znuA precursor |        |          |          |            |        |          |          |              |        |          |          |                |        |          |          |              |        |          |          |                |        |          |          |                         |     |       |       |    |    |    |   |   |   |   |  |

Show detected proteins only

Show all proteins

Filter by category:

GO: amino acid transport

Proteins found: 1424

Enter (or paste) list of ORFs

Find ORFs

Test

q-Value

p-Value

Cutoff

.005

Dot Plots

Dot Plots

| Signif | Direction | Applies To   |
|--------|-----------|--------------|
| yes    | +         | ratios, bars |
| no     | n/a       | bars         |
| yes    | -         | ratios, bars |
| yes    | +         | p-, q-Values |
| yes    | -         | p-, q-Values |

FnPg vs Fn

FnPgSg vs Fn

FnSg vs FnPg

FnPgSg vs FnSg

FnSg vs Fn

FnPgSg vs FnPg

FnPgSg vs FnSg

Fn Summary Table FnPg vs Fn FnSg vs Fn FnPgSg vs Fn FnPgSg vs FnPg FnSg vs FnPg FnPgSg vs FnSg Fn Coverage

| ORF           | FnPg vs Fn                                              |        |          |          | FnSg vs Fn |        |          |          | FnPgSg vs Fn |        |          |           | FnPgSg vs FnPg |        |          |          | FnSg vs FnPg |        |          |          | FnPgSg vs FnSg |        |          |          | Log <sub>2</sub> Ratios |     |       |       |    |    |    |   |   |   |   |  |  |  |  |  |  |  |  |
|---------------|---------------------------------------------------------|--------|----------|----------|------------|--------|----------|----------|--------------|--------|----------|-----------|----------------|--------|----------|----------|--------------|--------|----------|----------|----------------|--------|----------|----------|-------------------------|-----|-------|-------|----|----|----|---|---|---|---|--|--|--|--|--|--|--|--|
|               | Ratio                                                   | Sum    | q-Val    | p-Val    | Ratio      | Sum    | q-Val    | p-Val    | Ratio        | Sum    | q-Val    | p-Val     | Ratio          | Sum    | q-Val    | p-Val    | Ratio        | Sum    | q-Val    | p-Val    | Ratio          | Sum    | q-Val    | p-Val    | Ratio                   | Sum | q-Val | p-Val | -6 | -4 | -2 | 0 | 2 | 4 | 6 |  |  |  |  |  |  |  |  |
| <b>FN0672</b> |                                                         |        |          |          |            |        |          |          |              |        |          |           | 0.629          | 6.629  |          |          | 0.958        | 7.142  |          |          | -0.328         | 7.772  |          |          |                         |     |       |       |    |    |    |   |   |   |   |  |  |  |  |  |  |  |  |
|               | AAL94868.1   ATPase                                     |        |          |          |            |        |          |          |              |        |          |           |                |        |          |          |              |        |          |          |                |        |          |          |                         |     |       |       |    |    |    |   |   |   |   |  |  |  |  |  |  |  |  |
| <b>FN0675</b> | 0.293                                                   | 20.681 | 2.319e-1 | 6.732e-1 | 1.552      | 22.124 | 6.365e-3 | 2.739e-2 | -0.047       | 20.137 | 9.545e-2 | 5.335e-1  | -0.340         | 20.634 | 2.088e-1 | 6.325e-1 | 1.259        | 22.417 | 7.412e-2 | 4.62e-2  | -1.599         | 22.077 | 7.717e-3 | 2.578e-2 |                         |     |       |       |    |    |    |   |   |   |   |  |  |  |  |  |  |  |  |
|               | AAL94871.1   60 kDa chaperonin GROEL                    |        |          |          |            |        |          |          |              |        |          |           |                |        |          |          |              |        |          |          |                |        |          |          |                         |     |       |       |    |    |    |   |   |   |   |  |  |  |  |  |  |  |  |
| <b>FN0676</b> | -2.238                                                  | 13.222 |          |          | -2.415     | 13.229 | 3.02e-4  | 6.479e-4 | -1.245       | 14.012 | 5.316e-4 | 1.079e-3  | 0.993          | 11.977 |          |          | -0.177       | 10.991 |          |          | 1.171          | 11.985 | 2.937e-4 | 3.755e-4 |                         |     |       |       |    |    |    |   |   |   |   |  |  |  |  |  |  |  |  |
|               | AAL94872.1   10 kDa chaperonin GROES                    |        |          |          |            |        |          |          |              |        |          |           |                |        |          |          |              |        |          |          |                |        |          |          |                         |     |       |       |    |    |    |   |   |   |   |  |  |  |  |  |  |  |  |
| <b>FN0677</b> | -0.452                                                  | 12.428 | 7.458e-2 | 1.549e-1 | -0.420     | 12.645 | 9.004e-4 | 2.623e-3 | -1.849       | 10.827 | 1.647e-5 | 6.684e-6  | -1.397         | 10.579 | 3.454e-2 | 4.698e-2 | 0.032        | 12.193 | 4.123e-1 | 9.158e-1 | -1.430         | 10.796 | 9.163e-5 | 7.743e-5 |                         |     |       |       |    |    |    |   |   |   |   |  |  |  |  |  |  |  |  |
|               | AAL94873.1   Hypothetical protein                       |        |          |          |            |        |          |          |              |        |          |           |                |        |          |          |              |        |          |          |                |        |          |          |                         |     |       |       |    |    |    |   |   |   |   |  |  |  |  |  |  |  |  |
| <b>FN0678</b> | -2.001                                                  | 10.975 | 3.84e-3  | 3.143e-3 | -0.741     | 12.419 | 6.85e-5  | 9.561e-5 | -0.784       | 11.988 | 9.635e-5 | 1.029e-4  | 1.217          | 10.191 | 3.294e-2 | 4.369e-2 | 1.260        | 10.418 | 6.35e-2  | 3.463e-2 | -0.043         | 11.635 | 1.3e-1   | 6.463e-1 |                         |     |       |       |    |    |    |   |   |   |   |  |  |  |  |  |  |  |  |
|               | AAL94874.1   Ser/Thr protein kinase                     |        |          |          |            |        |          |          |              |        |          |           |                |        |          |          |              |        |          |          |                |        |          |          |                         |     |       |       |    |    |    |   |   |   |   |  |  |  |  |  |  |  |  |
| <b>FN0679</b> | -0.047                                                  | 8.116  | 2.976e-1 | 9.447e-1 | -1.004     | 7.344  |          |          | -2.037       | 5.922  |          |           | -1.990         | 6.079  |          |          | -0.957       | 7.297  |          |          | -1.033         | 5.307  |          |          |                         |     |       |       |    |    |    |   |   |   |   |  |  |  |  |  |  |  |  |
|               | AAL94875.1   GTPase                                     |        |          |          |            |        |          |          |              |        |          |           |                |        |          |          |              |        |          |          |                |        |          |          |                         |     |       |       |    |    |    |   |   |   |   |  |  |  |  |  |  |  |  |
| <b>FN0680</b> |                                                         |        |          |          |            |        |          |          |              |        |          |           | -0.422         | 5.578  |          |          | 0.608        | 6.793  |          |          | -1.031         | 6.370  |          |          |                         |     |       |       |    |    |    |   |   |   |   |  |  |  |  |  |  |  |  |
|               | AAL94876.1   Ribulose-phosphate 3-epimerase             |        |          |          |            |        |          |          |              |        |          |           |                |        |          |          |              |        |          |          |                |        |          |          |                         |     |       |       |    |    |    |   |   |   |   |  |  |  |  |  |  |  |  |
| <b>FN0681</b> | 0.072                                                   | 16.439 | 2.266e-1 | 6.533e-1 | -0.045     | 16.507 | 1.015e-1 | 6.006e-1 | -0.629       | 15.534 | 5.92e-4  | 1.237e-3  | -0.701         | 15.810 | 2.402e-2 | 2.75e-2  | -0.117       | 16.579 | 2.764e-1 | 4.986e-1 | -0.585         | 15.877 | 2.382e-3 | 5.769e-3 |                         |     |       |       |    |    |    |   |   |   |   |  |  |  |  |  |  |  |  |
|               | AAL94877.1   Transcriptional regulator, MarR family     |        |          |          |            |        |          |          |              |        |          |           |                |        |          |          |              |        |          |          |                |        |          |          |                         |     |       |       |    |    |    |   |   |   |   |  |  |  |  |  |  |  |  |
| <b>FN0682</b> | -0.287                                                  | 8.933  | 1.441e-1 | 3.602e-1 | 0.352      | 9.756  | 1.795e-2 | 9.098e-2 | -0.398       | 8.618  | 4.682e-2 | 2.403e-1  | -0.111         | 8.535  | 2.443e-1 | 7.748e-1 | 0.639        | 9.469  | 6.915e-2 | 4.046e-2 | -0.750         | 9.358  | 8.597e-3 | 2.928e-2 |                         |     |       |       |    |    |    |   |   |   |   |  |  |  |  |  |  |  |  |
|               | AAL94878.1   Fibronectin-binding protein-like protein A |        |          |          |            |        |          |          |              |        |          |           |                |        |          |          |              |        |          |          |                |        |          |          |                         |     |       |       |    |    |    |   |   |   |   |  |  |  |  |  |  |  |  |
| <b>FN0684</b> |                                                         |        |          |          |            |        |          |          |              |        |          |           | -2.867         | 6.240  |          |          | -0.796       | 8.495  | 1.86e-1  | 2.775e-1 | -2.070         | 5.628  |          |          |                         |     |       |       |    |    |    |   |   |   |   |  |  |  |  |  |  |  |  |
|               | AAL94880.1   Prismane protein                           |        |          |          |            |        |          |          |              |        |          |           |                |        |          |          |              |        |          |          |                |        |          |          |                         |     |       |       |    |    |    |   |   |   |   |  |  |  |  |  |  |  |  |
| <b>FN0685</b> | 1.715                                                   | 11.795 |          |          | 1.229      | 11.493 | 8.405e-3 | 3.802e-2 | -1.816       | 8.059  | 3.693e-5 | 2.531e-5  | -3.531         | 9.978  |          |          | -0.486       | 13.208 |          |          | -3.046         | 9.677  | 4.206e-3 | 1.193e-2 |                         |     |       |       |    |    |    |   |   |   |   |  |  |  |  |  |  |  |  |
|               | AAL94881.1   Sodium/pantothenate symporter              |        |          |          |            |        |          |          |              |        |          |           |                |        |          |          |              |        |          |          |                |        |          |          |                         |     |       |       |    |    |    |   |   |   |   |  |  |  |  |  |  |  |  |
| <b>FN0688</b> | -0.814                                                  | 10.428 |          |          | 0.481      | 11.908 | 1.35e-4  | 2.328e-4 | -2.434       | 8.604  | 1.698e-8 | 3.432e-10 | -1.621         | 7.994  |          |          | 1.295        | 11.094 |          |          | -2.916         | 9.474  | 1.716e-5 | 7.086e-6 |                         |     |       |       |    |    |    |   |   |   |   |  |  |  |  |  |  |  |  |
|               | AAL94884.1   Hypothetical protein                       |        |          |          |            |        |          |          |              |        |          |           |                |        |          |          |              |        |          |          |                |        |          |          |                         |     |       |       |    |    |    |   |   |   |   |  |  |  |  |  |  |  |  |
| <b>FN0689</b> | -1.400                                                  | 15.034 | 7.674e-3 | 8.181e-3 | -0.705     | 15.913 | 7.982e-3 | 3.579e-2 | -1.277       | 14.954 | 3.587e-5 | 2.382e-5  | 0.123          | 13.758 | 2.44e-1  | 7.739e-1 | 0.695        | 14.514 | 1.458e-1 | 1.783e-1 | -0.571         | 14.637 | 3.858e-2 | 1.661e-1 |                         |     |       |       |    |    |    |   |   |   |   |  |  |  |  |  |  |  |  |
|               | AAL94885.1   Hypothetical protein                       |        |          |          |            |        |          |          |              |        |          |           |                |        |          |          |              |        |          |          |                |        |          |          |                         |     |       |       |    |    |    |   |   |   |   |  |  |  |  |  |  |  |  |
| <b>FN0692</b> |                                                         |        |          |          | -1.624     | 7.070  | 3.245e-3 | 1.238e-2 | -2.211       | 6.096  |          |           |                |        |          |          |              |        |          |          | -0.587         | 4.860  |          |          |                         |     |       |       |    |    |    |   |   |   |   |  |  |  |  |  |  |  |  |
|               | AAL94888.1   Nitrogen regulation protein NIFR3          |        |          |          |            |        |          |          |              |        |          |           |                |        |          |          |              |        |          |          |                |        |          |          |                         |     |       |       |    |    |    |   |   |   |   |  |  |  |  |  |  |  |  |
| <b>FN0693</b> | -0.715                                                  | 9.438  |          |          |            |        |          |          | -1.515       | 8.434  |          |           | -0.800         | 7.923  |          |          |              |        |          |          |                |        |          |          |                         |     |       |       |    |    |    |   |   |   |   |  |  |  |  |  |  |  |  |
|               | AAL94889.1   DNA mismatch repair protein mutS           |        |          |          |            |        |          |          |              |        |          |           |                |        |          |          |              |        |          |          |                |        |          |          |                         |     |       |       |    |    |    |   |   |   |   |  |  |  |  |  |  |  |  |
| <b>FN0694</b> | -1.205                                                  | 11.775 | 2.013e-3 | 1.303e-3 | -0.540     | 12.624 | 2.427e-3 | 8.634e-3 | -0.881       | 11.895 | 4.819e-4 | 9.525e-4  | 0.324          | 10.894 | 2.604e-2 | 3.092e-2 | 0.664        | 11.419 | 5.857e-4 | 8.19e-6  | -0.341         | 11.743 | 4.346e-3 | 1.248e-2 |                         |     |       |       |    |    |    |   |   |   |   |  |  |  |  |  |  |  |  |
|               | AAL94890.1   S-layer protein                            |        |          |          |            |        |          |          |              |        |          |           |                |        |          |          |              |        |          |          |                |        |          |          |                         |     |       |       |    |    |    |   |   |   |   |  |  |  |  |  |  |  |  |
| <b>FN0695</b> | -0.255                                                  | 9.735  | 1.841e-1 | 5.011e-1 | 0.494      | 10.669 | 8.939e-3 | 4.09e-2  | -0.332       | 9.455  | 4.54e-2  | 2.321e-1  | -0.077         | 9.403  | 2.599e-1 | 8.421e-1 | 0.749        | 10.414 | 7.742e-2 | 5.045e-2 | -0.826         | 10.337 | 9.512e-4 | 1.814e-3 |                         |     |       |       |    |    |    |   |   |   |   |  |  |  |  |  |  |  |  |
|               | AAL94891.1   ABC transporter ATP-binding protein        |        |          |          |            |        |          |          |              |        |          |           |                |        |          |          |              |        |          |          |                |        |          |          |                         |     |       |       |    |    |    |   |   |   |   |  |  |  |  |  |  |  |  |

Show detected proteins only  
 Show all proteins  
 Filter by category:

Proteins found: 1424

Test Cutoff

| Signif | Direction | Applies To   |
|--------|-----------|--------------|
| yes    | +         | ratios, bars |
| no     | n/a       | bars         |
| yes    | -         | ratios, bars |
| yes    | +         | p-, q-Values |
| yes    | -         | p-, q-Values |

FnPg vs Fn — █ — FnSg vs Fn

FnPgSg vs Fn — █ — FnPgSg vs FnPg

FnSg vs FnPg — █ — FnPgSg vs FnSg

Fn Summary Table   FnPg vs Fn   FnSg vs Fn   FnPgSg vs Fn   FnPgSg vs FnPg   FnSg vs FnPg   FnPgSg vs FnSg   Fn Coverage

| ORF                                                           | FnPg vs Fn |        |          |          | FnSg vs Fn |        |          |          | FnPgSg vs Fn |        |          |          | FnPgSg vs FnPg |        |          |          | FnSg vs FnPg |        |          |          | FnPgSg vs FnSg |        |          |          | Log <sub>2</sub> Ratios |     |       |       |    |    |    |   |   |   |   |  |
|---------------------------------------------------------------|------------|--------|----------|----------|------------|--------|----------|----------|--------------|--------|----------|----------|----------------|--------|----------|----------|--------------|--------|----------|----------|----------------|--------|----------|----------|-------------------------|-----|-------|-------|----|----|----|---|---|---|---|--|
|                                                               | Ratio      | Sum    | q-Val    | p-Val    | Ratio      | Sum    | q-Val    | p-Val    | Ratio        | Sum    | q-Val    | p-Val    | Ratio          | Sum    | q-Val    | p-Val    | Ratio        | Sum    | q-Val    | p-Val    | Ratio          | Sum    | q-Val    | p-Val    | Ratio                   | Sum | q-Val | p-Val | -6 | -4 | -2 | 0 | 2 | 4 | 6 |  |
| <b>FN0697</b>                                                 | -0.888     | 15.023 | 2.426e-3 | 1.676e-3 | -0.654     | 15.441 | 2.525e-4 | 5.114e-4 | -0.279       | 15.429 | 1.298e-3 | 3.428e-3 | 0.610          | 14.744 | 8.259e-3 | 5.648e-3 | 0.234        | 14.553 | 1.472e-1 | 1.822e-1 | 0.376          | 15.163 | 2.452e-3 | 5.992e-3 |                         |     |       |       |    |    |    |   |   |   |   |  |
| AAL94893.1   Alanyl-tRNA synthetase                           |            |        |          |          |            |        |          |          |              |        |          |          |                |        |          |          |              |        |          |          |                |        |          |          |                         |     |       |       |    |    |    |   |   |   |   |  |
| <b>FN0699</b>                                                 | -2.041     | 12.095 | 2.411e-4 | 5.118e-5 | -2.538     | 11.782 | 4.124e-5 | 4.597e-5 | -0.586       | 13.346 | 2.026e-3 | 6.156e-3 | 1.455          | 11.509 | 6.894e-3 | 4.104e-3 | -0.498       | 9.741  | 1.948e-1 | 3.009e-1 | 1.952          | 11.196 | 1.933e-4 | 2.085e-4 |                         |     |       |       |    |    |    |   |   |   |   |  |
| AAL94895.1   Protein translocase subunit secD                 |            |        |          |          |            |        |          |          |              |        |          |          |                |        |          |          |              |        |          |          |                |        |          |          |                         |     |       |       |    |    |    |   |   |   |   |  |
| <b>FN0700</b>                                                 | -1.970     | 10.170 | 8.457e-4 | 3.581e-4 | -3.208     | 9.117  | 4.85e-4  | 1.179e-3 | -1.124       | 10.813 | 1.864e-3 | 5.557e-3 | 0.847          | 9.046  | 2.532e-2 | 2.968e-2 | -1.237       | 7.147  | 8.815e-2 | 6.643e-2 | 2.084          | 7.994  | 3.144e-6 | 5.274e-7 |                         |     |       |       |    |    |    |   |   |   |   |  |
| AAL94896.1   Protein translocase subunit secF                 |            |        |          |          |            |        |          |          |              |        |          |          |                |        |          |          |              |        |          |          |                |        |          |          |                         |     |       |       |    |    |    |   |   |   |   |  |
| <b>FN0701</b>                                                 | -0.323     | 15.171 | 7.1e-4   | 2.664e-4 | -0.888     | 14.791 | 1.253e-5 | 8.483e-6 | -0.241       | 15.049 | 4.958e-4 | 9.89e-4  | 0.082          | 14.930 | 7.371e-2 | 1.388e-1 | -0.565       | 14.468 | 2.414e-3 | 1.68e-4  | 0.647          | 14.550 | 8.241e-5 | 6.706e-5 |                         |     |       |       |    |    |    |   |   |   |   |  |
| AAL94897.1   Methyltransferase                                |            |        |          |          |            |        |          |          |              |        |          |          |                |        |          |          |              |        |          |          |                |        |          |          |                         |     |       |       |    |    |    |   |   |   |   |  |
| <b>FN0705</b>                                                 | -0.948     | 13.356 | 6.438e-3 | 6.416e-3 | -0.554     | 13.935 | 1.123e-4 | 1.815e-4 | -0.928       | 13.173 | 3.658e-5 | 2.481e-5 | 0.020          | 12.428 | 2.809e-1 | 9.364e-1 | 0.395        | 12.987 | 1.301e-1 | 1.401e-1 | -0.375         | 13.007 | 1.004e-3 | 1.947e-3 |                         |     |       |       |    |    |    |   |   |   |   |  |
| AAL94901.1   DNA polymerase I                                 |            |        |          |          |            |        |          |          |              |        |          |          |                |        |          |          |              |        |          |          |                |        |          |          |                         |     |       |       |    |    |    |   |   |   |   |  |
| <b>FN0706</b>                                                 |            |        |          |          | -1.443     | 5.443  |          |          | -0.664       | 5.834  |          |          |                |        |          |          |              |        |          |          | 0.779          | 4.779  |          |          |                         |     |       |       |    |    |    |   |   |   |   |  |
| AAL94902.1   Hypothetical cytosolic protein                   |            |        |          |          |            |        |          |          |              |        |          |          |                |        |          |          |              |        |          |          |                |        |          |          |                         |     |       |       |    |    |    |   |   |   |   |  |
| <b>FN0707</b>                                                 | -0.919     | 8.340  | 2.628e-2 | 3.818e-2 | -1.677     | 7.767  | 9.49e-4  | 2.796e-3 | -1.492       | 7.564  | 1.176e-3 | 2.978e-3 | -0.572         | 6.849  | 1.271e-1 | 3.164e-1 | -0.758       | 6.848  | 1.654e-1 | 2.271e-1 | 0.185          | 6.275  | 1.028e-1 | 4.958e-1 |                         |     |       |       |    |    |    |   |   |   |   |  |
| AAL94903.1   Riboflavin kinase                                |            |        |          |          |            |        |          |          |              |        |          |          |                |        |          |          |              |        |          |          |                |        |          |          |                         |     |       |       |    |    |    |   |   |   |   |  |
| <b>FN0710</b>                                                 | -0.325     | 11.975 | 3.353e-2 | 5.231e-2 | -0.551     | 11.934 | 2.344e-3 | 8.271e-3 | -0.639       | 11.457 | 1.889e-3 | 5.652e-3 | -0.314         | 11.337 | 5.238e-2 | 8.549e-2 | -0.226       | 11.609 | 1.391e-1 | 1.607e-1 | -0.088         | 11.295 | 1.796e-2 | 6.956e-2 |                         |     |       |       |    |    |    |   |   |   |   |  |
| AAL94906.1   Hypothetical protein                             |            |        |          |          |            |        |          |          |              |        |          |          |                |        |          |          |              |        |          |          |                |        |          |          |                         |     |       |       |    |    |    |   |   |   |   |  |
| <b>FN0711</b>                                                 | 0.574      | 7.601  |          |          | 1.073      | 8.284  | 1.013e-2 | 4.741e-2 | -0.279       | 6.543  | 6.685e-2 | 3.574e-1 | -0.854         | 7.321  |          |          | 0.499        | 8.858  |          |          | -1.353         | 8.005  | 8.191e-3 | 2.767e-2 |                         |     |       |       |    |    |    |   |   |   |   |  |
| AAL94907.1   Phosphopantothenate--cysteine ligase             |            |        |          |          |            |        |          |          |              |        |          |          |                |        |          |          |              |        |          |          |                |        |          |          |                         |     |       |       |    |    |    |   |   |   |   |  |
| <b>FN0714</b>                                                 |            |        |          |          |            |        |          |          |              |        |          |          |                |        |          |          | 0.579        | 6.868  | 8.837e-2 | 6.68e-2  |                |        |          |          |                         |     |       |       |    |    |    |   |   |   |   |  |
| AAL94910.1   NADH oxidase                                     |            |        |          |          |            |        |          |          |              |        |          |          |                |        |          |          |              |        |          |          |                |        |          |          |                         |     |       |       |    |    |    |   |   |   |   |  |
| <b>FN0715</b>                                                 | 0.137      | 14.316 | 2.68e-1  | 8.164e-1 | 0.029      | 14.392 | 9.823e-2 | 5.789e-1 | 0.854        | 14.829 | 4.094e-3 | 1.433e-2 | 0.717          | 15.170 | 8.524e-2 | 1.711e-1 | -0.108       | 14.529 | 3.952e-1 | 8.53e-1  | 0.825          | 15.246 | 4.6e-3   | 1.348e-2 |                         |     |       |       |    |    |    |   |   |   |   |  |
| AAL94911.1   Hypothetical protein                             |            |        |          |          |            |        |          |          |              |        |          |          |                |        |          |          |              |        |          |          |                |        |          |          |                         |     |       |       |    |    |    |   |   |   |   |  |
| <b>FN0716</b>                                                 | -0.970     | 11.302 | 2.889e-2 | 4.303e-2 | -0.235     | 12.221 | 2.347e-2 | 1.221e-1 | -1.301       | 10.767 | 1.141e-3 | 2.855e-3 | -0.331         | 10.001 | 1.889e-1 | 5.491e-1 | 0.735        | 11.251 | 1.181e-1 | 1.158e-1 | -1.066         | 10.920 | 1.651e-5 | 6.648e-6 |                         |     |       |       |    |    |    |   |   |   |   |  |
| AAL94912.1   hypothetical protein                             |            |        |          |          |            |        |          |          |              |        |          |          |                |        |          |          |              |        |          |          |                |        |          |          |                         |     |       |       |    |    |    |   |   |   |   |  |
| <b>FN0717</b>                                                 |            |        |          |          | -0.747     | 5.391  |          |          | -0.553       | 5.197  |          |          |                |        |          |          |              |        |          |          | 0.194          | 4.838  |          |          |                         |     |       |       |    |    |    |   |   |   |   |  |
| AAL94913.1   Ribosomal small subunit pseudouridine synthase A |            |        |          |          |            |        |          |          |              |        |          |          |                |        |          |          |              |        |          |          |                |        |          |          |                         |     |       |       |    |    |    |   |   |   |   |  |
| <b>FN0719</b>                                                 |            |        |          |          |            |        |          |          |              |        |          |          |                |        |          |          |              |        |          |          |                |        |          |          |                         |     |       |       |    |    |    |   |   |   |   |  |
| AAL94915.1   Hypothetical cytosolic protein                   |            |        |          |          |            |        |          |          |              |        |          |          |                |        |          |          |              |        |          |          |                |        |          |          |                         |     |       |       |    |    |    |   |   |   |   |  |
| <b>FN0720</b>                                                 | -1.271     | 13.663 | 1.901e-4 | 3.531e-5 | -1.166     | 13.952 | 2.368e-3 | 8.377e-3 | -1.880       | 12.850 | 7.657e-5 | 7.375e-5 | -0.610         | 11.783 | 2.682e-2 | 3.226e-2 | 0.104        | 12.681 | 3.747e-1 | 7.823e-1 | -0.714         | 12.072 | 4.008e-2 | 1.736e-1 |                         |     |       |       |    |    |    |   |   |   |   |  |
| AAL94916.1   Protein Translation Elongation Factor P (EF-P)   |            |        |          |          |            |        |          |          |              |        |          |          |                |        |          |          |              |        |          |          |                |        |          |          |                         |     |       |       |    |    |    |   |   |   |   |  |
| <b>FN0721</b>                                                 | -2.523     | 10.323 | 1.122e-3 | 5.666e-4 | -1.317     | 11.714 | 9.684e-7 | 1.428e-7 | -1.131       | 11.511 | 2.317e-4 | 3.61e-4  | 1.392          | 9.191  | 9.474e-3 | 6.935e-3 | 1.207        | 9.191  | 5.226e-2 | 2.476e-2 | 0.185          | 10.583 | 4.316e-2 | 1.888e-1 |                         |     |       |       |    |    |    |   |   |   |   |  |
| AAL94917.1   Hypothetical protein                             |            |        |          |          |            |        |          |          |              |        |          |          |                |        |          |          |              |        |          |          |                |        |          |          |                         |     |       |       |    |    |    |   |   |   |   |  |
| <b>FN0722</b>                                                 | -0.674     | 7.275  | 4.278e-2 | 7.23e-2  | -0.475     | 7.658  | 1.291e-2 | 6.278e-2 | -1.872       | 5.872  |          |          | -1.198         | 5.402  |          |          | 0.199        | 6.984  | 3.202e-1 | 6.151e-1 | -1.397         | 5.786  |          |          |                         |     |       |       |    |    |    |   |   |   |   |  |
| AAL94918.1   WD-repeat family protein                         |            |        |          |          |            |        |          |          |              |        |          |          |                |        |          |          |              |        |          |          |                |        |          |          |                         |     |       |       |    |    |    |   |   |   |   |  |

Show detected proteins only  
 Show all proteins  
 Filter by category:

Proteins found: 1424

Enter (or paste) list of ORFs

Find ORFs

Test   Cutoff

q-Value   .005

p-Value

Dot Plots  
Dot Plots

| Signif | Direction | Applies To   |
|--------|-----------|--------------|
| yes    | +         | ratios, bars |
| no     | n/a       | bars         |
| yes    | -         | ratios, bars |
| yes    | +         | p-, q-Values |
| yes    | -         | p-, q-Values |



Fn Summary Table

FnPg vs Fn

FnSg vs Fn

FnPgSg vs FnPg

FnPgSg vs FnPg

FnSg vs FnPg

FnPgSg vs FnSg

Fn Coverage

| ORF           | FnPg vs Fn                                                      |        |          |          | FnSg vs Fn |        |          |          | FnPgSg vs FnPg |        |          |          | FnSg vs FnPg |        |          |          | FnPgSg vs FnSg |        |          |          | Log <sub>2</sub> Ratios |        |          |          |          |   |   |  |  |
|---------------|-----------------------------------------------------------------|--------|----------|----------|------------|--------|----------|----------|----------------|--------|----------|----------|--------------|--------|----------|----------|----------------|--------|----------|----------|-------------------------|--------|----------|----------|----------|---|---|--|--|
|               | Ratio                                                           | Sum    | q-Val    | p-Val    | Ratio      | Sum    | q-Val    | p-Val    | Ratio          | Sum    | q-Val    | p-Val    | Ratio        | Sum    | q-Val    | p-Val    | Ratio          | Sum    | q-Val    | p-Val    | -6                      | -4     | -2       | 0        | 2        | 4 | 6 |  |  |
| <b>FN0723</b> |                                                                 |        |          |          |            |        |          |          |                |        |          |          |              |        |          |          | 0.230          | 4.414  |          |          |                         |        |          |          |          |   |   |  |  |
|               | AAL94919.1   Hypothetical protein                               |        |          |          |            |        |          |          |                |        |          |          |              |        |          |          |                |        |          |          |                         |        |          |          |          |   |   |  |  |
| <b>FN0724</b> | 0.527                                                           | 10.961 | 1.99e-3  | 1.28e-3  | 0.725      | 11.343 | 9.616e-3 | 4.466e-2 | 0.344          | 10.574 | 1.666e-2 | 7.341e-2 | -0.183       | 11.305 | 9.02e-2  | 1.864e-1 | 0.198          | 11.870 | 2.208e-1 | 3.618e-1 | -0.381                  | 11.687 | 3.506e-2 | 1.488e-1 |          |   |   |  |  |
|               | AAL94920.1   Flavodoxin                                         |        |          |          |            |        |          |          |                |        |          |          |              |        |          |          |                |        |          |          |                         |        |          |          |          |   |   |  |  |
| <b>FN0725</b> | 0.639                                                           | 7.469  | 1.276e-1 | 3.087e-1 | 1.581      | 8.595  | 3.629e-3 | 1.428e-2 | 0.016          | 6.642  | 1.604e-1 | 9.67e-1  | -0.623       | 7.485  | 1.33e-1  | 3.392e-1 | 0.942          | 9.234  | 8.216e-2 | 5.711e-2 | -1.565                  | 8.611  | 3.401e-3 | 8.996e-3 |          |   |   |  |  |
|               | AAL94921.1   Molybdopterin biosynthesis MoeB protein            |        |          |          |            |        |          |          |                |        |          |          |              |        |          |          |                |        |          |          |                         |        |          |          |          |   |   |  |  |
| <b>FN0728</b> | 0.390                                                           | 10.411 | 3.142e-3 | 2.396e-3 | 0.434      | 10.640 | 5.332e-4 | 1.337e-3 | 0.298          | 10.116 | 9.09e-4  | 2.113e-3 | -0.092       | 10.709 | 2.338e-2 | 2.648e-2 | 0.044          | 11.030 | 2.072e-2 | 4.912e-3 | -0.136                  | 10.938 | 2.482e-3 | 6.088e-3 |          |   |   |  |  |
|               | AAL94924.1   Hypothetical protein                               |        |          |          |            |        |          |          |                |        |          |          |              |        |          |          |                |        |          |          |                         |        |          |          |          |   |   |  |  |
| <b>FN0729</b> | -0.595                                                          | 15.069 | 5.641e-2 | 1.06e-1  | -1.268     | 14.581 | 6.792e-5 | 9.439e-5 | -0.521         | 14.939 | 6.743e-4 | 1.462e-3 | 0.074        | 14.548 | 2.571e-1 | 8.297e-1 | -0.672         | 13.985 | 1.529e-1 | 1.974e-1 | 0.747                   | 14.060 | 2.999e-3 | 7.674e-3 |          |   |   |  |  |
|               | AAL94925.1   Phosphoglycerate mutase                            |        |          |          |            |        |          |          |                |        |          |          |              |        |          |          |                |        |          |          |                         |        |          |          |          |   |   |  |  |
| <b>FN0731</b> | 0.969                                                           | 9.971  | 6.08e-2  | 1.182e-1 | -0.446     | 8.740  | 2.745e-2 | 1.451e-1 | -0.059         | 8.739  | 7.61e-2  | 4.131e-1 | -1.028       | 9.912  | 6.179e-2 | 1.091e-1 | -1.416         | 9.709  | 8.692e-2 | 6.439e-2 | 0.387                   | 8.681  | 4.482e-2 | 1.97e-1  |          |   |   |  |  |
|               | AAL94927.1   Hypothetical protein                               |        |          |          |            |        |          |          |                |        |          |          |              |        |          |          |                |        |          |          |                         |        |          |          |          |   |   |  |  |
| <b>FN0733</b> | -0.641                                                          | 13.087 | 1.256e-2 | 1.49e-2  | -1.280     | 12.632 | 1.505e-5 | 1.085e-5 | 0.483          | 14.007 | 3.863e-5 | 2.793e-5 | 1.123        | 13.570 | 3.011e-3 | 1.233e-3 | -0.640         | 11.992 | 7.913e-2 | 5.28e-2  | 1.763                   | 13.115 | 3.459e-6 | 6.111e-7 |          |   |   |  |  |
|               | AAL94929.1   Peptidase T                                        |        |          |          |            |        |          |          |                |        |          |          |              |        |          |          |                |        |          |          |                         |        |          |          |          |   |   |  |  |
| <b>FN0734</b> |                                                                 |        |          |          | -1.617     | 5.582  | 5.426e-5 | 6.813e-5 |                |        |          |          |              |        |          |          |                |        |          |          |                         |        |          |          |          |   |   |  |  |
|               | AAL94930.1   Fe-S oxidoreductase                                |        |          |          |            |        |          |          |                |        |          |          |              |        |          |          |                |        |          |          |                         |        |          |          |          |   |   |  |  |
| <b>FN0735</b> | 0.018                                                           | 13.715 | 3.04e-1  | 9.736e-1 | -1.818     | 12.063 | 7.361e-6 | 3.616e-6 | -0.054         | 13.439 | 1.183e-1 | 6.795e-1 | -0.072       | 13.661 | 2.727e-1 | 8.987e-1 | -1.836         | 12.081 | 1.241e-1 | 1.275e-1 | 1.765                   | 12.009 | 7.314e-4 | 1.272e-3 |          |   |   |  |  |
|               | AAL94931.1   Cell surface protein                               |        |          |          |            |        |          |          |                |        |          |          |              |        |          |          |                |        |          |          |                         |        |          |          |          |   |   |  |  |
| <b>FN0736</b> |                                                                 |        |          |          |            |        |          |          |                |        |          |          |              | 0.349  | 5.716    | 1.385e-1 | 3.605e-1       | 1.465  | 7.017    | 7.327e-3 | 1.095e-3                | -1.116 | 7.366    | 1.799e-3 | 4.056e-3 |   |   |  |  |
|               | AAL94932.1   Methyltransferase                                  |        |          |          |            |        |          |          |                |        |          |          |              |        |          |          |                |        |          |          |                         |        |          |          |          |   |   |  |  |
| <b>FN0737</b> |                                                                 |        |          |          |            |        |          |          |                |        |          |          |              | -0.908 | 8.707    |          |                |        |          |          |                         |        |          |          |          |   |   |  |  |
|               | AAL94933.1   Hypothetical protein                               |        |          |          |            |        |          |          |                |        |          |          |              |        |          |          |                |        |          |          |                         |        |          |          |          |   |   |  |  |
| <b>FN0738</b> | -0.806                                                          | 11.548 | 7.814e-4 | 3.119e-4 | -0.943     | 11.505 | 2.79e-3  | 1.024e-2 | -1.700         | 10.360 | 5.852e-5 | 5.076e-5 | -0.894       | 9.757  | 9.526e-3 | 6.993e-3 | -0.137         | 10.699 | 3.267e-1 | 6.335e-1 | -0.757                  | 9.805  | 2.537e-2 | 1.032e-1 |          |   |   |  |  |
|               | AAL94934.1   Hypothetical exported 24-amino acid repeat protein |        |          |          |            |        |          |          |                |        |          |          |              |        |          |          |                |        |          |          |                         |        |          |          |          |   |   |  |  |
| <b>FN0739</b> | -0.513                                                          | 15.451 | 1.985e-3 | 1.275e-3 | -0.733     | 15.416 | 5.84e-4  | 1.501e-3 | 0.591          | 16.351 | 9.206e-5 | 9.607e-5 | 1.104        | 16.041 | 5.335e-4 | 9.82e-5  | -0.219         | 14.903 | 1.404e-1 | 1.64e-1  | 1.323                   | 16.007 | 3.31e-5  | 1.872e-5 |          |   |   |  |  |
|               | AAL94935.1   Formiminotetrahydrofolate cyclodeaminase           |        |          |          |            |        |          |          |                |        |          |          |              |        |          |          |                |        |          |          |                         |        |          |          |          |   |   |  |  |
| <b>FN0740</b> | -0.223                                                          | 17.608 | 2.153e-1 | 6.116e-1 | 0.434      | 18.450 | 1.528e-2 | 7.616e-2 | -0.616         | 17.012 | 1.28e-4  | 1.542e-4 | -0.393       | 16.992 | 1.717e-1 | 4.807e-1 | 0.658          | 18.227 | 1.348e-1 | 1.506e-1 | -1.050                  | 17.835 | 4.295e-3 | 1.228e-2 |          |   |   |  |  |
|               | AAL94936.1   Imidazolonepropionase                              |        |          |          |            |        |          |          |                |        |          |          |              |        |          |          |                |        |          |          |                         |        |          |          |          |   |   |  |  |
| <b>FN0741</b> | -0.254                                                          | 18.286 | 1.884e-1 | 5.171e-1 | -0.038     | 18.686 | 1.211e-1 | 7.32e-1  | 0.288          | 18.624 | 2.784e-3 | 9.005e-3 | 0.542        | 18.574 | 8.821e-2 | 1.802e-1 | 0.216          | 18.432 | 3.115e-1 | 5.908e-1 | 0.326                   | 18.975 | 7.731e-3 | 2.584e-2 |          |   |   |  |  |
|               | AAL94937.1   Glutamate formiminotransferase                     |        |          |          |            |        |          |          |                |        |          |          |              |        |          |          |                |        |          |          |                         |        |          |          |          |   |   |  |  |
| <b>FN0742</b> | -0.400                                                          | 12.066 |          |          | -0.576     | 12.074 | 7.048e-3 | 3.095e-2 | -0.460         | 11.802 | 2.817e-2 | 1.334e-1 | -0.060       | 11.605 |          |          | -0.176         | 11.674 |          |          | 0.116                   | 11.614 | 1.398e-1 | 7.029e-1 |          |   |   |  |  |
|               | AAL94938.1   unknown                                            |        |          |          |            |        |          |          |                |        |          |          |              |        |          |          |                |        |          |          |                         |        |          |          |          |   |   |  |  |
| <b>FN0743</b> |                                                                 |        |          |          | -1.291     | 5.907  | 1.824e-4 | 3.424e-4 | 0.211          | 7.022  | 5.456e-3 | 2.028e-2 |              |        |          |          |                |        |          |          | 1.503                   | 6.119  | 4.719e-5 | 3.226e-5 |          |   |   |  |  |
|               | AAL94939.1   ATP-dependent helicase, DinG family                |        |          |          |            |        |          |          |                |        |          |          |              |        |          |          |                |        |          |          |                         |        |          |          |          |   |   |  |  |

Show detected proteins only  
 Show all proteins  
 Filter by category:

Proteins found: 1424

**Test**      **Cutoff**

| Signif | Direction | Applies To   |
|--------|-----------|--------------|
| yes    | +         | ratios, bars |
| no     | n/a       | bars         |
| yes    | -         | ratios, bars |
| yes    | +         | p-, q-Values |
| yes    | -         | p-, q-Values |

FnPg vs Fn — █ — Fn vs Fn

FnPgSg vs FnPg — █ — FnPgSg vs FnPg

FnSg vs FnPg — █ — FnPgSg vs FnSg

Fn Summary Table FnPg vs Fn FnSg vs Fn FnPgSg vs Fn FnPgSg vs FnPg FnSg vs FnPg FnPgSg vs FnSg Fn Coverage

| ORF           | FnPg vs Fn                                                                 |        |          |          | FnSg vs Fn |        |          |          | FnPgSg vs Fn |        |          |          | FnPgSg vs FnPg |        |          |          | FnSg vs FnPg |        |          |          | FnPgSg vs FnSg |        |          |          | Log <sub>2</sub> Ratios |     |       |       |    |    |    |   |   |   |   |  |
|---------------|----------------------------------------------------------------------------|--------|----------|----------|------------|--------|----------|----------|--------------|--------|----------|----------|----------------|--------|----------|----------|--------------|--------|----------|----------|----------------|--------|----------|----------|-------------------------|-----|-------|-------|----|----|----|---|---|---|---|--|
|               | Ratio                                                                      | Sum    | q-Val    | p-Val    | Ratio      | Sum    | q-Val    | p-Val    | Ratio        | Sum    | q-Val    | p-Val    | Ratio          | Sum    | q-Val    | p-Val    | Ratio        | Sum    | q-Val    | p-Val    | Ratio          | Sum    | q-Val    | p-Val    | Ratio                   | Sum | q-Val | p-Val | -6 | -4 | -2 | 0 | 2 | 4 | 6 |  |
| <b>FN0745</b> | -0.804                                                                     | 14.359 | 2.971e-2 | 4.461e-2 | -0.104     | 15.243 | 1.099e-1 | 6.559e-1 | -0.765       | 14.194 | 3.351e-3 | 1.126e-2 | 0.039          | 13.594 | 2.765e-1 | 9.162e-1 | 0.700        | 14.439 | 1.084e-1 | 9.875e-2 | -0.661         | 14.479 | 1.661e-2 | 6.357e-2 |                         |     |       |       |    |    |    |   |   |   |   |  |
|               | AAL94941.1   metal dependent phosphohydrolase                              |        |          |          |            |        |          |          |              |        |          |          |                |        |          |          |              |        |          |          |                |        |          |          |                         |     |       |       |    |    |    |   |   |   |   |  |
| <b>FN0746</b> | 0.470                                                                      | 7.371  |          |          | 0.239      | 7.325  |          |          |              |        |          |          |                |        |          |          | -0.231       | 7.795  | 3.577e-1 | 7.271e-1 |                |        |          |          |                         |     |       |       |    |    |    |   |   |   |   |  |
|               | AAL94942.1   Hypothetical Metal-Binding Protein                            |        |          |          |            |        |          |          |              |        |          |          |                |        |          |          |              |        |          |          |                |        |          |          |                         |     |       |       |    |    |    |   |   |   |   |  |
| <b>FN0749</b> |                                                                            |        |          |          |            |        |          |          | -0.864       | 5.579  |          |          |                |        |          |          |              |        |          |          |                |        |          |          |                         |     |       |       |    |    |    |   |   |   |   |  |
|               | AAL94945.1   Hypothetical protein                                          |        |          |          |            |        |          |          |              |        |          |          |                |        |          |          |              |        |          |          |                |        |          |          |                         |     |       |       |    |    |    |   |   |   |   |  |
| <b>FN0750</b> | -0.814                                                                     | 9.463  | 6.976e-3 | 7.184e-3 | 0.682      | 11.143 | 3.125e-5 | 3.036e-5 | -1.869       | 8.204  | 2.312e-4 | 3.598e-4 | -1.055         | 7.594  | 2.892e-2 | 3.608e-2 | 1.496        | 10.329 | 3.169e-3 | 2.864e-4 | -2.551         | 9.274  | 5.349e-5 | 3.806e-5 |                         |     |       |       |    |    |    |   |   |   |   |  |
|               | AAL94946.1   Hypothetical protein                                          |        |          |          |            |        |          |          |              |        |          |          |                |        |          |          |              |        |          |          |                |        |          |          |                         |     |       |       |    |    |    |   |   |   |   |  |
| <b>FN0751</b> | -0.553                                                                     | 8.549  | 4.505e-2 | 7.772e-2 | 0.312      | 9.598  | 2.544e-2 | 1.334e-1 | -0.623       | 8.276  | 2.707e-3 | 8.698e-3 | -0.070         | 7.927  | 2.538e-1 | 8.153e-1 | 0.864        | 9.045  | 4.183e-2 | 1.629e-2 | -0.934         | 8.976  | 4.039e-3 | 1.129e-2 |                         |     |       |       |    |    |    |   |   |   |   |  |
|               | AAL94947.1   L-asparaginase I                                              |        |          |          |            |        |          |          |              |        |          |          |                |        |          |          |              |        |          |          |                |        |          |          |                         |     |       |       |    |    |    |   |   |   |   |  |
| <b>FN0752</b> | -0.408                                                                     | 8.171  | 1.659e-1 | 4.341e-1 | 0.104      | 8.868  | 3.433e-2 | 1.859e-1 | -1.588       | 6.788  | 1.331e-4 | 1.632e-4 | -1.180         | 6.584  | 1.005e-1 | 2.212e-1 | 0.512        | 8.460  | 2.058e-1 | 3.26e-1  | -1.692         | 7.280  | 3.767e-5 | 2.284e-5 |                         |     |       |       |    |    |    |   |   |   |   |  |
|               | AAL94948.1   Proline iminopeptidase                                        |        |          |          |            |        |          |          |              |        |          |          |                |        |          |          |              |        |          |          |                |        |          |          |                         |     |       |       |    |    |    |   |   |   |   |  |
| <b>FN0753</b> | 0.623                                                                      | 12.598 | 6.089e-3 | 5.94e-3  | -0.116     | 12.044 | 8.057e-2 | 4.656e-1 | 1.007        | 12.778 | 5.188e-4 | 1.047e-3 | 0.384          | 13.604 | 4.261e-4 | 6.832e-5 | -0.738       | 12.667 | 7.267e-4 | 1.671e-5 | 1.122          | 13.051 | 3.642e-7 | 3.4e-8   |                         |     |       |       |    |    |    |   |   |   |   |  |
|               | AAL94949.1   Glutamyl-tRNA(Gln) amidotransferase subunit B                 |        |          |          |            |        |          |          |              |        |          |          |                |        |          |          |              |        |          |          |                |        |          |          |                         |     |       |       |    |    |    |   |   |   |   |  |
| <b>FN0754</b> | -0.166                                                                     | 13.764 | 1.542e-1 | 3.937e-1 | -0.420     | 13.694 | 9.565e-3 | 4.437e-2 | -0.034       | 13.692 | 1.354e-1 | 7.925e-1 | 0.132          | 13.730 | 1.904e-1 | 5.553e-1 | -0.254       | 13.528 | 2.054e-1 | 3.252e-1 | 0.386          | 13.660 | 2.115e-2 | 8.418e-2 |                         |     |       |       |    |    |    |   |   |   |   |  |
|               | AAL94950.1   Glutamyl-tRNA(Gln) amidotransferase subunit A                 |        |          |          |            |        |          |          |              |        |          |          |                |        |          |          |              |        |          |          |                |        |          |          |                         |     |       |       |    |    |    |   |   |   |   |  |
| <b>FN0755</b> | -0.990                                                                     | 10.984 | 4.575e-3 | 4.019e-3 | -1.054     | 11.105 | 7.568e-4 | 2.122e-3 | -0.741       | 11.029 | 1.173e-3 | 2.969e-3 | 0.249          | 10.243 | 6.245e-2 | 1.106e-1 | -0.064       | 10.115 | 2.386e-1 | 4.074e-1 | 0.313          | 10.364 | 1.69e-2  | 6.487e-2 |                         |     |       |       |    |    |    |   |   |   |   |  |
|               | AAL94951.1   Glutamyl-tRNA(Gln) amidotransferase subunit C                 |        |          |          |            |        |          |          |              |        |          |          |                |        |          |          |              |        |          |          |                |        |          |          |                         |     |       |       |    |    |    |   |   |   |   |  |
| <b>FN0758</b> | -0.636                                                                     | 15.014 | 6.197e-4 | 2.131e-4 | -0.123     | 15.712 | 8.126e-2 | 4.7e-1   | -0.951       | 14.496 | 1.389e-4 | 1.738e-4 | -0.315         | 14.064 | 2.591e-2 | 3.069e-2 | 0.513        | 15.076 | 8.518e-2 | 6.162e-2 | -0.828         | 14.761 | 7.804e-3 | 2.615e-2 |                         |     |       |       |    |    |    |   |   |   |   |  |
|               | AAL94954.1   Rod shape-determining protein mreB                            |        |          |          |            |        |          |          |              |        |          |          |                |        |          |          |              |        |          |          |                |        |          |          |                         |     |       |       |    |    |    |   |   |   |   |  |
| <b>FN0761</b> | 1.146                                                                      | 9.350  |          |          | 0.070      | 8.459  | 1.305e-1 | 7.978e-1 | -0.342       | 7.659  | 4.446e-2 | 2.267e-1 | -1.488         | 9.008  |          |          | -1.076       | 9.604  |          |          | -0.412         | 8.116  | 3.712e-2 | 1.588e-1 |                         |     |       |       |    |    |    |   |   |   |   |  |
|               | AAL94957.1   Bvg accessory factor                                          |        |          |          |            |        |          |          |              |        |          |          |                |        |          |          |              |        |          |          |                |        |          |          |                         |     |       |       |    |    |    |   |   |   |   |  |
| <b>FN0765</b> | -0.706                                                                     | 6.321  |          |          | -2.020     | 5.190  |          |          | -1.411       | 5.411  |          |          | -0.705         | 4.909  |          |          | -1.315       | 4.485  |          |          | 0.609          | 3.779  |          |          |                         |     |       |       |    |    |    |   |   |   |   |  |
|               | AAL94961.1   tRNA (5-methylaminomethyl-2-thiouridylate) -methyltransferase |        |          |          |            |        |          |          |              |        |          |          |                |        |          |          |              |        |          |          |                |        |          |          |                         |     |       |       |    |    |    |   |   |   |   |  |
| <b>FN0766</b> |                                                                            |        |          |          |            |        |          |          | 0.488        | 8.871  |          |          |                |        |          |          |              |        |          |          |                |        |          |          |                         |     |       |       |    |    |    |   |   |   |   |  |
|               | AAL94962.1   Large-conductance mechanosensitive channel                    |        |          |          |            |        |          |          |              |        |          |          |                |        |          |          |              |        |          |          |                |        |          |          |                         |     |       |       |    |    |    |   |   |   |   |  |
| <b>FN0768</b> | -1.501                                                                     | 5.501  |          |          |            |        |          |          | -1.399       | 5.399  |          |          | 0.102          | 4.102  |          |          |              |        |          |          |                |        |          |          |                         |     |       |       |    |    |    |   |   |   |   |  |
|               | AAL94964.1   Hemin receptor                                                |        |          |          |            |        |          |          |              |        |          |          |                |        |          |          |              |        |          |          |                |        |          |          |                         |     |       |       |    |    |    |   |   |   |   |  |
| <b>FN0771</b> |                                                                            |        |          |          | -1.844     | 6.738  |          |          |              |        |          |          |                |        |          |          |              |        |          |          |                |        |          |          |                         |     |       |       |    |    |    |   |   |   |   |  |
|               | AAL94967.1   Oxygen-independent coproporphyrinogen III oxidase             |        |          |          |            |        |          |          |              |        |          |          |                |        |          |          |              |        |          |          |                |        |          |          |                         |     |       |       |    |    |    |   |   |   |   |  |
| <b>FN0772</b> |                                                                            |        |          |          |            |        |          |          |              |        |          |          |                |        |          |          |              |        |          |          |                |        |          |          |                         |     |       |       |    |    |    |   |   |   |   |  |
|               | AAL94968.1   Flavodoxin                                                    |        |          |          |            |        |          |          |              |        |          |          |                |        |          |          |              |        |          |          |                |        |          |          |                         |     |       |       |    |    |    |   |   |   |   |  |
| <b>FN0774</b> | -1.485                                                                     | 13.578 | 9.811e-4 | 4.556e-4 | -3.087     | 12.161 | 1.752e-5 | 1.35e-5  | -0.436       | 14.423 | 9.202e-3 | 3.744e-2 | 1.049          | 13.142 | 9.962e-3 | 7.501e-3 | -1.602       | 10.676 | 4.351e-2 | 1.752e-2 | 2.651          | 11.725 | 1.671e-3 | 3.706e-3 |                         |     |       |       |    |    |    |   |   |   |   |  |
|               | AAL94970.1   Hypothetical cytosolic protein                                |        |          |          |            |        |          |          |              |        |          |          |                |        |          |          |              |        |          |          |                |        |          |          |                         |     |       |       |    |    |    |   |   |   |   |  |

Show detected proteins only  
 Show all proteins  
 Filter by category:

Proteins found: 1424

Enter (or paste) list of ORFs

Find ORFs

Test Cutoff

q-Value p-Value

.005

Dot Plots

| Signif | Direction | Applies To   |
|--------|-----------|--------------|
| yes    | +         | ratios, bars |
| no     | n/a       | bars         |
| yes    | -         | ratios, bars |
| yes    | +         | p-, q-Values |
| yes    | -         | p-, q-Values |

FnPg vs Fn — — FnSg vs Fn  
 FnPgSg vs Fn — — FnPgSg vs FnPg  
 FnSg vs FnPg — — FnPgSg vs FnSg

Fn Summary Table   FnPg vs Fn   FnSg vs Fn   FnPgSg vs Fn   FnPgSg vs FnPg   FnSg vs FnPg   FnPgSg vs FnSg   Fn Coverage

| ORF           | FnPg vs Fn                                                |        |          |          | FnSg vs Fn |        |          |          | FnPgSg vs Fn |        |          |          | FnPgSg vs FnPg |        |          |          | FnSg vs FnPg |        |          |          | FnPgSg vs FnSg |        |          |          | Log <sub>2</sub> Ratios |     |       |       |    |    |    |   |   |   |   |  |  |  |  |  |  |  |  |  |  |
|---------------|-----------------------------------------------------------|--------|----------|----------|------------|--------|----------|----------|--------------|--------|----------|----------|----------------|--------|----------|----------|--------------|--------|----------|----------|----------------|--------|----------|----------|-------------------------|-----|-------|-------|----|----|----|---|---|---|---|--|--|--|--|--|--|--|--|--|--|
|               | Ratio                                                     | Sum    | q-Val    | p-Val    | Ratio      | Sum    | q-Val    | p-Val    | Ratio        | Sum    | q-Val    | p-Val    | Ratio          | Sum    | q-Val    | p-Val    | Ratio        | Sum    | q-Val    | p-Val    | Ratio          | Sum    | q-Val    | p-Val    | Ratio                   | Sum | q-Val | p-Val | -6 | -4 | -2 | 0 | 2 | 4 | 6 |  |  |  |  |  |  |  |  |  |  |
| <b>FN0775</b> | -0.365                                                    | 16.737 | 1.277e-1 | 3.09e-1  | -0.491     | 16.796 | 1.102e-4 | 1.771e-4 | -0.699       | 16.200 | 1.849e-6 | 3.037e-7 | -0.334         | 16.039 | 1.62e-1  | 4.443e-1 | -0.126       | 16.431 | 3.637e-1 | 7.462e-1 | -0.208         | 16.097 | 4.753e-3 | 1.406e-2 |                         |     |       |       |    |    |    |   |   |   |   |  |  |  |  |  |  |  |  |  |  |
|               | AAL94971.1   Aspartyl aminopeptidase                      |        |          |          |            |        |          |          |              |        |          |          |                |        |          |          |              |        |          |          |                |        |          |          |                         |     |       |       |    |    |    |   |   |   |   |  |  |  |  |  |  |  |  |  |  |
| <b>FN0776</b> | -0.544                                                    | 12.818 | 9.877e-3 | 1.119e-2 | 0.001      | 13.548 | 1.573e-1 | 9.918e-1 | -0.808       | 12.351 | 1.605e-3 | 4.605e-3 | -0.264         | 12.011 | 1.524e-2 | 1.451e-2 | 0.545        | 13.004 | 2.901e-3 | 2.384e-4 | -0.809         | 12.740 | 1.938e-5 | 8.774e-6 |                         |     |       |       |    |    |    |   |   |   |   |  |  |  |  |  |  |  |  |  |  |
|               | AAL94972.1   Aspartate-ammonia ligase                     |        |          |          |            |        |          |          |              |        |          |          |                |        |          |          |              |        |          |          |                |        |          |          |                         |     |       |       |    |    |    |   |   |   |   |  |  |  |  |  |  |  |  |  |  |
| <b>FN0777</b> | -0.718                                                    | 11.661 | 1.643e-2 | 2.09e-2  | 0.035      | 12.600 | 1.364e-1 | 8.395e-1 | 0.357        | 12.533 | 1.327e-2 | 5.67e-2  | 1.076          | 12.019 | 1.108e-4 | 1.037e-5 | 0.754        | 11.881 | 1.469e-2 | 2.998e-3 | 0.322          | 12.957 | 6.432e-3 | 2.06e-2  |                         |     |       |       |    |    |    |   |   |   |   |  |  |  |  |  |  |  |  |  |  |
|               | AAL94973.1   GTP-binding protein lepA                     |        |          |          |            |        |          |          |              |        |          |          |                |        |          |          |              |        |          |          |                |        |          |          |                         |     |       |       |    |    |    |   |   |   |   |  |  |  |  |  |  |  |  |  |  |
| <b>FN0778</b> | -1.013                                                    | 9.000  | 3.391e-2 | 5.311e-2 | -0.442     | 9.755  | 5.398e-4 | 1.358e-3 | -1.087       | 8.721  |          |          | -0.074         | 7.912  |          |          | 0.571        | 8.742  | 1.696e-1 | 2.373e-1 | -0.645         | 8.667  |          |          |                         |     |       |       |    |    |    |   |   |   |   |  |  |  |  |  |  |  |  |  |  |
|               | AAL94974.1   Methyltransferase                            |        |          |          |            |        |          |          |              |        |          |          |                |        |          |          |              |        |          |          |                |        |          |          |                         |     |       |       |    |    |    |   |   |   |   |  |  |  |  |  |  |  |  |  |  |
| <b>FN0779</b> |                                                           |        |          |          |            |        |          |          |              |        |          |          |                |        |          |          | 0.819        | 5.648  |          |          |                |        |          |          |                         |     |       |       |    |    |    |   |   |   |   |  |  |  |  |  |  |  |  |  |  |
|               | AAL94975.1   Putative GTPases (G3E family)                |        |          |          |            |        |          |          |              |        |          |          |                |        |          |          |              |        |          |          |                |        |          |          |                         |     |       |       |    |    |    |   |   |   |   |  |  |  |  |  |  |  |  |  |  |
| <b>FN0783</b> | 0.114                                                     | 23.085 | 1.388e-1 | 3.433e-1 | -0.196     | 22.959 | 1.153e-2 | 5.503e-2 | 0.931        | 23.698 | 4.028e-3 | 1.405e-2 | 0.817          | 24.016 | 1.433e-2 | 1.31e-2  | -0.310       | 23.073 | 8.181e-2 | 5.661e-2 | 1.127          | 23.890 | 3.135e-3 | 8.112e-3 |                         |     |       |       |    |    |    |   |   |   |   |  |  |  |  |  |  |  |  |  |  |
|               | AAL94979.1   acyl-CoA dehydrogenase                       |        |          |          |            |        |          |          |              |        |          |          |                |        |          |          |              |        |          |          |                |        |          |          |                         |     |       |       |    |    |    |   |   |   |   |  |  |  |  |  |  |  |  |  |  |
| <b>FN0784</b> | -0.300                                                    | 22.413 | 8.082e-2 | 1.723e-1 | -0.325     | 22.572 | 7.081e-3 | 3.113e-2 | -0.082       | 22.427 | 9.113e-2 | 5.064e-1 | 0.218          | 22.331 | 1.348e-1 | 3.467e-1 | -0.025       | 22.273 | 4.104e-1 | 9.089e-1 | 0.243          | 22.490 | 3.765e-2 | 1.615e-1 |                         |     |       |       |    |    |    |   |   |   |   |  |  |  |  |  |  |  |  |  |  |
|               | AAL94980.1   Electron transfer flavoprotein beta-subunit  |        |          |          |            |        |          |          |              |        |          |          |                |        |          |          |              |        |          |          |                |        |          |          |                         |     |       |       |    |    |    |   |   |   |   |  |  |  |  |  |  |  |  |  |  |
| <b>FN0785</b> | 0.019                                                     | 21.833 | 2.747e-1 | 8.446e-1 | -0.067     | 21.932 | 1.008e-1 | 5.956e-1 | -0.348       | 21.263 | 1.182e-3 | 2.999e-3 | -0.366         | 21.485 | 1.978e-2 | 2.089e-2 | -0.085       | 21.951 | 2.939e-1 | 5.434e-1 | -0.281         | 21.584 | 2.38e-2  | 9.609e-2 |                         |     |       |       |    |    |    |   |   |   |   |  |  |  |  |  |  |  |  |  |  |
|               | AAL94981.1   Electron transfer flavoprotein alpha-subunit |        |          |          |            |        |          |          |              |        |          |          |                |        |          |          |              |        |          |          |                |        |          |          |                         |     |       |       |    |    |    |   |   |   |   |  |  |  |  |  |  |  |  |  |  |
| <b>FN0788</b> | 0.597                                                     | 9.459  | 5.714e-3 | 5.441e-3 | 0.484      | 9.531  | 9.059e-3 | 4.156e-2 | 0.016        | 8.675  | 1.563e-1 | 9.377e-1 | -0.581         | 9.475  | 1.342e-2 | 1.181e-2 | -0.113       | 10.128 | 2.482e-2 | 4.307e-1 | -0.468         | 9.547  | 1.429e-2 | 5.336e-2 |                         |     |       |       |    |    |    |   |   |   |   |  |  |  |  |  |  |  |  |  |  |
|               | AAL94984.1   unknown                                      |        |          |          |            |        |          |          |              |        |          |          |                |        |          |          |              |        |          |          |                |        |          |          |                         |     |       |       |    |    |    |   |   |   |   |  |  |  |  |  |  |  |  |  |  |
| <b>FN0790</b> | -1.542                                                    | 6.739  | 1.755e-3 | 1.065e-3 | -0.605     | 7.860  | 1.985e-5 | 1.632e-5 | -1.717       | 6.361  |          |          | -0.174         | 5.022  |          |          | 0.937        | 6.318  | 3.515e-2 | 1.213e-2 | -1.111         | 6.143  |          |          |                         |     |       |       |    |    |    |   |   |   |   |  |  |  |  |  |  |  |  |  |  |
|               | AAL94986.1   Xylose repressor                             |        |          |          |            |        |          |          |              |        |          |          |                |        |          |          |              |        |          |          |                |        |          |          |                         |     |       |       |    |    |    |   |   |   |   |  |  |  |  |  |  |  |  |  |  |
| <b>FN0791</b> | -0.142                                                    | 18.534 | 1.267e-1 | 3.059e-1 | -0.247     | 18.614 | 2.21e-2  | 1.143e-1 | -0.404       | 18.068 | 1.095e-3 | 2.699e-3 | -0.262         | 18.129 | 7.291e-2 | 1.367e-1 | -0.105       | 18.471 | 3.015e-1 | 5.636e-1 | -0.157         | 18.209 | 6.807e-2 | 3.146e-1 |                         |     |       |       |    |    |    |   |   |   |   |  |  |  |  |  |  |  |  |  |  |
|               | AAL94987.1   Histidine ammonia-lyase                      |        |          |          |            |        |          |          |              |        |          |          |                |        |          |          |              |        |          |          |                |        |          |          |                         |     |       |       |    |    |    |   |   |   |   |  |  |  |  |  |  |  |  |  |  |
| <b>FN0792</b> | 0.041                                                     | 20.440 | 2.873e-1 | 8.985e-1 | 0.238      | 20.822 | 5.849e-4 | 1.504e-3 | -0.341       | 19.854 | 2.672e-4 | 4.339e-4 | -0.382         | 20.099 | 1.319e-1 | 3.348e-1 | 0.197        | 20.863 | 2.865e-1 | 5.241e-1 | -0.579         | 20.481 | 3.913e-5 | 2.429e-5 |                         |     |       |       |    |    |    |   |   |   |   |  |  |  |  |  |  |  |  |  |  |
|               | AAL94988.1   Urocanate hydratase                          |        |          |          |            |        |          |          |              |        |          |          |                |        |          |          |              |        |          |          |                |        |          |          |                         |     |       |       |    |    |    |   |   |   |   |  |  |  |  |  |  |  |  |  |  |
| <b>FN0793</b> | -0.749                                                    | 7.919  |          |          |            |        |          |          | 0.585        | 9.049  |          |          | 1.334          | 8.504  |          |          |              |        |          |          |                |        |          |          |                         |     |       |       |    |    |    |   |   |   |   |  |  |  |  |  |  |  |  |  |  |
|               | AAL94989.1   Sodium/glutamate symport carrier protein     |        |          |          |            |        |          |          |              |        |          |          |                |        |          |          |              |        |          |          |                |        |          |          |                         |     |       |       |    |    |    |   |   |   |   |  |  |  |  |  |  |  |  |  |  |
| <b>FN0794</b> | 0.570                                                     | 7.244  |          |          | 1.117      | 7.976  | 1.338e-4 | 2.299e-4 | -0.428       | 6.043  |          |          | -0.998         | 6.816  |          |          | 0.547        | 8.545  |          |          | -1.545         | 7.548  |          |          |                         |     |       |       |    |    |    |   |   |   |   |  |  |  |  |  |  |  |  |  |  |
|               | AAL94990.1   Hypothetical protein                         |        |          |          |            |        |          |          |              |        |          |          |                |        |          |          |              |        |          |          |                |        |          |          |                         |     |       |       |    |    |    |   |   |   |   |  |  |  |  |  |  |  |  |  |  |
| <b>FN0796</b> | -0.165                                                    | 15.072 | 1.399e-1 | 3.468e-1 | -0.217     | 15.204 | 1.154e-3 | 3.536e-3 | -0.552       | 14.481 | 1.323e-4 | 1.618e-4 | -0.387         | 14.519 | 6.494e-2 | 1.166e-1 | -0.052       | 15.039 | 3.704e-1 | 7.68e-1  | -0.335         | 14.652 | 5.547e-4 | 8.644e-4 |                         |     |       |       |    |    |    |   |   |   |   |  |  |  |  |  |  |  |  |  |  |
|               | AAL94992.1   Pyruvate,phosphate dikinase                  |        |          |          |            |        |          |          |              |        |          |          |                |        |          |          |              |        |          |          |                |        |          |          |                         |     |       |       |    |    |    |   |   |   |   |  |  |  |  |  |  |  |  |  |  |
| <b>FN0798</b> | -0.232                                                    | 7.274  | 2.163e-1 | 6.154e-1 | 1.292      | 8.982  | 2.66e-2  | 1.401e-1 | 0.280        | 7.582  | 1.017e-1 | 5.729e-1 | 0.512          | 7.554  | 1.03e-1  | 2.302e-1 | 1.523        | 8.750  | 1.185e-1 | 1.167e-1 | -1.012         | 9.262  | 4.355e-2 | 1.907e-1 |                         |     |       |       |    |    |    |   |   |   |   |  |  |  |  |  |  |  |  |  |  |
|               | AAL94994.1   Fructose-1,6-bisphosphatase                  |        |          |          |            |        |          |          |              |        |          |          |                |        |          |          |              |        |          |          |                |        |          |          |                         |     |       |       |    |    |    |   |   |   |   |  |  |  |  |  |  |  |  |  |  |
| <b>FN0799</b> | 0.417                                                     | 8.365  | 1.651e-1 | 4.315e-1 | 0.442      | 8.575  | 8.966e-3 | 4.105e-2 | -0.172       | 7.573  |          |          | -0.589         | 8.193  |          |          | 0.025        | 8.992  | 4.223e-1 | 9.542e-1 | -0.614         | 8.403  |          |          |                         |     |       |       |    |    |    |   |   |   |   |  |  |  |  |  |  |  |  |  |  |
|               | AAL94995.1   Isoamylase                                   |        |          |          |            |        |          |          |              |        |          |          |                |        |          |          |              |        |          |          |                |        |          |          |                         |     |       |       |    |    |    |   |   |   |   |  |  |  |  |  |  |  |  |  |  |

Show detected proteins only  
 Show all proteins

Filter by category:  
GO: amino acid transport

Proteins found: 1424

Enter (or paste) list of ORFs

Find ORFs

Test Cutoff

q-Value p-Value

.005

Dot Plots

| Signif | Direction | Applies To   |
|--------|-----------|--------------|
| yes    | +         | ratios, bars |
| no     | n/a       | bars         |
| yes    | -         | ratios, bars |
| yes    | +         | p-, q-Values |
| yes    | -         | p-, q-Values |

FnPg vs Fn — ■ — FnSg vs Fn

FnPgSg vs Fn — ■ — FnPgSg vs FnPg

FnSg vs FnPg — ■ — FnPgSg vs FnSg

Fn Summary Table

FnPg vs Fn

FnSg vs Fn

FnPgSg vs Fn

FnPgSg vs FnPg

FnSg vs FnPg

FnPgSg vs FnSg

Fn Coverage

| ORF                                                                         | FnPg vs Fn |        |          |          | FnSg vs Fn |        |          |          | FnPgSg vs Fn |        |          |          | FnPgSg vs FnPg |        |          |          | FnSg vs FnPg |        |          |          | FnPgSg vs FnSg |        |          |          | Log <sub>2</sub> Ratios |     |       |       |    |    |    |   |   |   |   |  |
|-----------------------------------------------------------------------------|------------|--------|----------|----------|------------|--------|----------|----------|--------------|--------|----------|----------|----------------|--------|----------|----------|--------------|--------|----------|----------|----------------|--------|----------|----------|-------------------------|-----|-------|-------|----|----|----|---|---|---|---|--|
|                                                                             | Ratio      | Sum    | q-Val    | p-Val    | Ratio      | Sum    | q-Val    | p-Val    | Ratio        | Sum    | q-Val    | p-Val    | Ratio          | Sum    | q-Val    | p-Val    | Ratio        | Sum    | q-Val    | p-Val    | Ratio          | Sum    | q-Val    | p-Val    | Ratio                   | Sum | q-Val | p-Val | -6 | -4 | -2 | 0 | 2 | 4 | 6 |  |
| <b>FN0800</b><br>AAL94996.1   Amino acid-binding protein                    | -0.203     | 10.414 | 2.558e-1 | 7.663e-1 | 0.133      | 10.934 | 4.685e-2 | 2.599e-1 | 1.398        | 11.810 | 1.159e-3 | 2.917e-3 | 1.601          | 11.811 | 1.504e-2 | 1.419e-2 | 0.336        | 10.731 | 3.194e-1 | 6.127e-1 | 1.264          | 12.332 | 1.287e-3 | 2.673e-3 |                         |     |       |       |    |    |    |   |   |   |   |  |
| <b>FN0801</b><br>AAL94997.1   Amino acid transport ATP-binding protein      | 0.663      | 7.677  |          |          | 0.906      | 8.105  | 6.488e-6 | 2.993e-6 |              |        |          |          |                |        |          |          | 0.243        | 8.768  |          |          |                |        |          |          |                         |     |       |       |    |    |    |   |   |   |   |  |
| <b>FN0802</b><br>AAL94998.1   Amino acid transport system permease protein  |            |        |          |          |            |        |          |          |              |        |          |          |                |        |          |          |              |        |          |          |                |        |          |          |                         |     |       |       |    |    |    |   |   |   |   |  |
| <b>FN0803</b><br>AAL94999.1   Cytochrome C-TYPE biogenesis protein ccdA     | -1.108     | 12.619 | 9.426e-3 | 1.057e-2 | -1.679     | 12.233 | 1.802e-3 | 6.016e-3 | -1.139       | 12.385 | 3.573e-3 | 1.215e-2 | -0.030         | 11.480 | 2.651e-1 | 8.648e-1 | -0.571       | 11.124 | 6.377e-2 | 3.49e-2  | 0.540          | 11.094 | 4.987e-3 | 1.498e-2 |                         |     |       |       |    |    |    |   |   |   |   |  |
| <b>FN0805</b><br>AAL95001.1   Hypothetical protein                          | 1.098      | 6.525  |          |          | 0.966      | 6.577  |          |          | -0.640       | 4.583  |          |          | -1.738         | 5.884  | 1.516e-3 | 4.597e-4 | -0.132       | 7.675  | 1.304e-1 | 1.407e-1 | -1.606         | 5.937  | 1.328e-4 | 1.252e-4 |                         |     |       |       |    |    |    |   |   |   |   |  |
| <b>FN0806</b><br>AAL95002.1   SpoIID homolog                                | -0.933     | 12.992 | 3.472e-3 | 2.747e-3 | -0.810     | 13.300 | 1.075e-3 | 3.245e-3 | -0.680       | 13.041 | 1.185e-3 | 3.01e-3  | 0.253          | 12.312 | 5.498e-2 | 9.234e-2 | 0.123        | 12.367 | 1.288e-1 | 1.374e-1 | 0.130          | 12.620 | 6.766e-2 | 3.125e-1 |                         |     |       |       |    |    |    |   |   |   |   |  |
| <b>FN0807</b><br>AAL95003.1   3-deoxy-manno-octulosonate cytidyltransferase | -0.123     | 10.335 | 2.081e-1 | 5.857e-1 | -1.467     | 9.175  | 3.587e-3 | 1.407e-2 | -0.330       | 9.925  | 4.398e-2 | 2.24e-1  | -0.207         | 10.006 | 2.849e-2 | 3.526e-2 | -1.344       | 9.052  | 1.066e-3 | 3.371e-5 | 1.138          | 8.846  | 1.433e-4 | 1.392e-4 |                         |     |       |       |    |    |    |   |   |   |   |  |
| <b>FN0808</b><br>AAL95004.1   Phosphoglycerate mutase                       | 0.194      | 12.115 | 7.773e-2 | 1.635e-1 | 0.309      | 12.415 | 3.683e-3 | 1.456e-2 | -0.392       | 11.325 | 4.92e-3  | 1.79e-2  | -0.586         | 11.723 | 1.062e-2 | 8.316e-3 | 0.115        | 12.609 | 2.173e-1 | 3.531e-1 | -0.701         | 12.023 | 5.939e-4 | 9.545e-4 |                         |     |       |       |    |    |    |   |   |   |   |  |
| <b>FN0809</b><br>AAL95005.1   23S rRNA methyltransferase                    | -1.688     | 7.688  |          |          | -0.780     | 8.780  |          |          | -1.127       | 8.045  |          |          | 0.561          | 6.561  |          |          | 0.908        | 7.092  |          |          | -0.346         | 7.654  |          |          |                         |     |       |       |    |    |    |   |   |   |   |  |
| <b>FN0810</b><br>AAL95006.1   Low-specificity threonine aldolase            | -0.040     | 11.620 | 2.449e-1 | 7.231e-1 | 0.027      | 11.872 | 1.541e-1 | 9.681e-1 | -1.644       | 9.813  | 1.044e-4 | 1.167e-4 | -1.603         | 9.977  | 3.696e-3 | 1.683e-3 | 0.068        | 11.832 | 4.141e-1 | 9.228e-1 | -1.671         | 10.229 | 4.747e-2 | 2.101e-1 |                         |     |       |       |    |    |    |   |   |   |   |  |
| <b>FN0811</b><br>AAL95007.1   Hypothetical protein                          |            |        |          |          |            |        |          |          |              |        |          |          |                |        |          |          |              |        |          |          |                |        |          |          |                         |     |       |       |    |    |    |   |   |   |   |  |
| <b>FN0813</b><br>AAL95009.1   Transcriptional regulator, TetR family        | 1.746      | 8.898  |          |          | 2.271      | 9.608  | 2.515e-6 | 6.469e-7 | -0.317       | 6.632  | 9.265e-2 | 5.159e-1 | -2.063         | 8.581  |          |          | 0.526        | 11.354 |          |          | -2.588         | 9.291  | 1.507e-4 | 1.494e-4 |                         |     |       |       |    |    |    |   |   |   |   |  |
| <b>FN0814</b><br>AAL95010.1   Propionate CoA-transferase                    | -3.939     | 13.406 | 4.364e-6 | 2.23e-7  | -4.936     | 12.593 | 2.075e-5 | 1.732e-5 | -0.729       | 16.413 | 3.378e-5 | 2.113e-5 | 3.210          | 12.677 | 1.028e-4 | 8.812e-6 | -0.998       | 8.654  | 1.97e-1  | 3.062e-1 | 4.207          | 11.864 | 3.637e-5 | 2.161e-5 |                         |     |       |       |    |    |    |   |   |   |   |  |
| <b>FN0815</b><br>AAL95011.1   Propionate permease                           |            |        |          |          |            |        |          |          | 0.171        | 11.483 | 1.807e-2 | 8.055e-2 |                |        |          |          |              |        |          |          |                |        |          |          |                         |     |       |       |    |    |    |   |   |   |   |  |
| <b>FN0816</b><br>AAL95012.1   dehydrogenase with MaoC-like domain           | -2.404     | 13.956 |          |          |            |        |          |          | -1.830       | 14.326 | 1.691e-5 | 6.994e-6 | 0.574          | 12.126 |          |          |              |        |          |          |                |        |          |          |                         |     |       |       |    |    |    |   |   |   |   |  |
| <b>FN0818</b><br>AAL95014.1   DNA-binding protein HU                        | -0.807     | 19.104 | 2.353e-2 | 3.323e-2 | -2.046     | 18.049 | 3.655e-5 | 3.81e-5  | -0.030       | 19.677 | 1.22e-1  | 7.032e-1 | 0.777          | 19.073 | 3.084e-2 | 3.959e-2 | -1.239       | 17.242 | 9.136e-2 | 7.177e-2 | 2.016          | 18.019 | 2.237e-5 | 1.089e-5 |                         |     |       |       |    |    |    |   |   |   |   |  |
| <b>FN0819</b><br>AAL95015.1   Tetratricopeptide repeat family protein       | -0.455     | 11.840 | 4.324e-2 | 7.337e-2 | -0.439     | 12.040 | 2.865e-3 | 1.059e-2 | -0.003       | 12.089 | 1.633e-1 | 9.878e-1 | 0.453          | 11.837 | 6.012e-2 | 1.051e-1 | 0.016        | 11.585 | 4.201e-1 | 9.459e-1 | 0.437          | 12.038 | 1.701e-2 | 6.535e-2 |                         |     |       |       |    |    |    |   |   |   |   |  |

Show detected proteins only

Show all proteins

Filter by category:

GO: amino acid transport

Proteins found:

1424

Enter (or paste) list of ORFs

Find ORFs

**Test**      **Cutoff**

q-Value

p-Value

.005

Dot Plots

Dot Plots

| Signif | Direction | Applies To   |
|--------|-----------|--------------|
| yes    | +         | ratios, bars |
| no     | n/a       | bars         |
| yes    | -         | ratios, bars |
| yes    | +         | p-, q-Values |
| yes    | -         | p-, q-Values |

— FnPg vs Fn      — FnSg vs Fn  
— FnPgSg vs Fn      — FnPgSg vs FnPg  
— FnSg vs FnPg      — FnPgSg vs FnSg



Fn Summary Table

FnPg vs Fn

FnSg vs Fn

FnPgSg vs Fn

FnPgSg vs FnPg

FnSg vs FnPg

FnPgSg vs FnSg

Fn Coverage

| ORF           | FnPg vs Fn                                         |        |          |          | FnSg vs Fn |        |          |          | FnPgSg vs Fn |        |          |          | FnPgSg vs FnPg |        |          |          | FnSg vs FnPg |        |          |          | FnPgSg vs FnSg |        |          |          | Log <sub>2</sub> Ratios |     |       |       |    |    |    |   |   |   |   |  |
|---------------|----------------------------------------------------|--------|----------|----------|------------|--------|----------|----------|--------------|--------|----------|----------|----------------|--------|----------|----------|--------------|--------|----------|----------|----------------|--------|----------|----------|-------------------------|-----|-------|-------|----|----|----|---|---|---|---|--|
|               | Ratio                                              | Sum    | q-Val    | p-Val    | Ratio      | Sum    | q-Val    | p-Val    | Ratio        | Sum    | q-Val    | p-Val    | Ratio          | Sum    | q-Val    | p-Val    | Ratio        | Sum    | q-Val    | p-Val    | Ratio          | Sum    | q-Val    | p-Val    | Ratio                   | Sum | q-Val | p-Val | -6 | -4 | -2 | 0 | 2 | 4 | 6 |  |
| <b>FN0820</b> | -0.033                                             | 14.729 | 2.787e-1 | 8.615e-1 | -0.261     | 14.685 | 3.42e-2  | 1.851e-1 | -0.244       | 14.313 | 7.001e-3 | 2.717e-2 | -0.211         | 14.484 | 1.36e-1  | 3.515e-1 | -0.228       | 14.652 | 2.305e-1 | 3.862e-1 | 0.017          | 14.440 | 1.768e-1 | 9.29e-1  |                         |     |       |       |    |    |    |   |   |   |   |  |
|               | AAL95016.1  Mercuric reductase                     |        |          |          |            |        |          |          |              |        |          |          |                |        |          |          |              |        |          |          |                |        |          |          |                         |     |       |       |    |    |    |   |   |   |   |  |
| <b>FN0821</b> | -0.301                                             | 13.129 | 1.883e-1 | 5.166e-1 | -1.906     | 11.708 | 3.531e-5 | 3.619e-5 | -1.142       | 12.084 | 2.269e-4 | 3.499e-4 | -0.841         | 11.986 | 1.092e-1 | 2.534e-1 | -1.605       | 11.407 | 1.204e-1 | 1.202e-1 | 0.764          | 10.566 | 4.059e-3 | 1.136e-2 |                         |     |       |       |    |    |    |   |   |   |   |  |
|               | AAL95017.1  Hypothetical protein                   |        |          |          |            |        |          |          |              |        |          |          |                |        |          |          |              |        |          |          |                |        |          |          |                         |     |       |       |    |    |    |   |   |   |   |  |
| <b>FN0823</b> | 1.149                                              | 9.558  | 2.902e-2 | 4.329e-2 | 2.457      | 11.051 | 2.501e-6 | 6.407e-7 | 0.170        | 8.375  | 8.063e-2 | 4.41e-1  | -0.979         | 9.728  | 4.119e-2 | 5.994e-2 | 1.308        | 12.200 | 8.822e-3 | 1.439e-3 | -2.287         | 11.221 | 8.633e-6 | 2.239e-6 |                         |     |       |       |    |    |    |   |   |   |   |  |
|               | AAL95019.1  GTP-binding protein hflX               |        |          |          |            |        |          |          |              |        |          |          |                |        |          |          |              |        |          |          |                |        |          |          |                         |     |       |       |    |    |    |   |   |   |   |  |
| <b>FN0824</b> |                                                    |        |          |          |            |        |          |          |              |        |          |          |                |        |          |          |              |        |          |          |                |        |          |          |                         |     |       |       |    |    |    |   |   |   |   |  |
|               | AAL95020.1  hypothetical cytosolic protein         |        |          |          |            |        |          |          |              |        |          |          |                |        |          |          |              |        |          |          |                |        |          |          |                         |     |       |       |    |    |    |   |   |   |   |  |
| <b>FN0825</b> | -1.068                                             | 12.189 | 1.567e-2 | 1.965e-2 | -1.849     | 11.592 | 1.905e-6 | 4.211e-7 | -1.529       | 11.525 | 7.45e-5  | 7.091e-5 | -0.461         | 10.661 | 1.347e-1 | 3.462e-1 | -0.782       | 10.524 | 1.472e-1 | 1.822e-1 | 0.321          | 10.063 | 2.875e-2 | 1.187e-1 |                         |     |       |       |    |    |    |   |   |   |   |  |
|               | AAL95021.1  Hypothetical cytosolic protein         |        |          |          |            |        |          |          |              |        |          |          |                |        |          |          |              |        |          |          |                |        |          |          |                         |     |       |       |    |    |    |   |   |   |   |  |
| <b>FN0826</b> | -1.809                                             | 9.442  | 4.137e-4 | 1.131e-4 | -1.468     | 9.967  | 3.602e-4 | 8.111e-4 | -0.526       | 10.521 | 1.786e-3 | 5.264e-3 | 1.282          | 8.916  | 4.308e-3 | 2.06e-3  | 0.340        | 8.158  | 2.634e-1 | 4.668e-1 | 0.942          | 9.440  | 4.821e-3 | 1.433e-2 |                         |     |       |       |    |    |    |   |   |   |   |  |
|               | AAL95022.1  periplasmic component of efflux system |        |          |          |            |        |          |          |              |        |          |          |                |        |          |          |              |        |          |          |                |        |          |          |                         |     |       |       |    |    |    |   |   |   |   |  |
| <b>FN0827</b> | -2.166                                             | 9.449  | 9.592e-3 | 1.08e-2  | -0.594     | 11.207 | 1.769e-2 | 8.952e-2 | -1.579       | 9.833  | 4.789e-3 | 1.733e-2 | 0.587          | 7.870  | 6.144e-3 | 3.415e-3 | 1.573        | 9.040  | 6.343e-3 | 8.378e-4 | -0.986         | 9.627  | 1.874e-3 | 4.262e-3 |                         |     |       |       |    |    |    |   |   |   |   |  |
|               | AAL95023.1  ABC transporter ATP-binding protein    |        |          |          |            |        |          |          |              |        |          |          |                |        |          |          |              |        |          |          |                |        |          |          |                         |     |       |       |    |    |    |   |   |   |   |  |
| <b>FN0828</b> |                                                    |        |          |          | -1.864     | 6.988  | 2.085e-4 | 4.025e-4 | -1.647       | 6.817  |          |          |                |        |          |          |              |        |          |          | 0.217          | 5.341  |          |          |                         |     |       |       |    |    |    |   |   |   |   |  |
|               | AAL95024.1  ABC transporter permease protein       |        |          |          |            |        |          |          |              |        |          |          |                |        |          |          |              |        |          |          |                |        |          |          |                         |     |       |       |    |    |    |   |   |   |   |  |
| <b>FN0830</b> | 1.059                                              | 11.207 | 1.03e-3  | 4.918e-4 | 1.224      | 11.557 | 1.181e-4 | 1.94e-4  | -1.340       | 8.606  | 4.172e-3 | 1.467e-2 | -2.398         | 9.868  | 1.125e-3 | 2.942e-4 | 0.165        | 12.616 | 1.271e-1 | 1.338e-1 | -2.563         | 10.218 | 3.223e-4 | 4.247e-4 |                         |     |       |       |    |    |    |   |   |   |   |  |
|               | AAL95026.1  Hypothetical protein                   |        |          |          |            |        |          |          |              |        |          |          |                |        |          |          |              |        |          |          |                |        |          |          |                         |     |       |       |    |    |    |   |   |   |   |  |
| <b>FN0831</b> |                                                    |        |          |          |            |        |          |          |              |        |          |          |                |        |          |          |              |        |          |          |                |        |          |          |                         |     |       |       |    |    |    |   |   |   |   |  |
|               | AAL95027.1  Hemin receptor                         |        |          |          |            |        |          |          |              |        |          |          |                |        |          |          |              |        |          |          |                |        |          |          |                         |     |       |       |    |    |    |   |   |   |   |  |
| <b>FN0832</b> | 0.110                                              | 12.638 | 2.816e-1 | 8.741e-1 | -1.488     | 11.225 | 9.803e-5 | 1.524e-4 | 0.226        | 12.551 | 1.779e-2 | 7.913e-2 | 0.117          | 12.865 | 2.631e-1 | 8.56e-1  | -1.597       | 11.335 | 1.593e-1 | 2.126e-1 | 1.714          | 11.452 | 1.427e-4 | 1.383e-4 |                         |     |       |       |    |    |    |   |   |   |   |  |
|               | AAL95028.1  Hypothetical protein                   |        |          |          |            |        |          |          |              |        |          |          |                |        |          |          |              |        |          |          |                |        |          |          |                         |     |       |       |    |    |    |   |   |   |   |  |
| <b>FN0833</b> | -3.561                                             | 8.205  |          |          | -1.099     | 10.852 | 1.368e-3 | 4.349e-3 | -2.045       | 9.517  | 7.314e-4 | 1.613e-3 | 1.516          | 6.160  |          |          | 2.462        | 7.291  |          |          | -0.946         | 8.807  | 1.439e-2 | 5.376e-2 |                         |     |       |       |    |    |    |   |   |   |   |  |
|               | AAL95029.1  Hypothetical protein                   |        |          |          |            |        |          |          |              |        |          |          |                |        |          |          |              |        |          |          |                |        |          |          |                         |     |       |       |    |    |    |   |   |   |   |  |
| <b>FN0834</b> | -0.508                                             | 10.209 | 1.577e-1 | 4.055e-1 | -1.783     | 9.118  | 2.469e-5 | 2.207e-5 | -0.963       | 9.550  | 1.062e-5 | 3.442e-6 | -0.455         | 9.246  | 1.962e-1 | 5.8e-1   | -1.275       | 8.610  | 1.84e-1  | 2.724e-1 | 0.820          | 8.155  | 1.883e-3 | 4.288e-3 |                         |     |       |       |    |    |    |   |   |   |   |  |
|               | AAL95030.1  Hypothetical Exported Protein          |        |          |          |            |        |          |          |              |        |          |          |                |        |          |          |              |        |          |          |                |        |          |          |                         |     |       |       |    |    |    |   |   |   |   |  |
| <b>FN0835</b> |                                                    |        |          |          |            |        |          |          |              |        |          |          |                |        |          |          |              |        |          |          |                |        |          |          |                         |     |       |       |    |    |    |   |   |   |   |  |
|               | AAL95031.1  Hypothetical protein                   |        |          |          |            |        |          |          |              |        |          |          |                |        |          |          |              |        |          |          |                |        |          |          |                         |     |       |       |    |    |    |   |   |   |   |  |
| <b>FN0836</b> | 1.061                                              | 8.887  | 5.62e-2  | 1.054e-1 | -0.069     | 7.941  | 9.826e-2 | 5.79e-1  | 0.384        | 8.006  | 7.241e-2 | 3.906e-1 | -0.677         | 9.270  | 1.011e-1 | 2.233e-1 | -1.130       | 9.002  | 1.078e-1 | 9.769e-2 | 0.453          | 8.325  | 7.05e-2  | 3.273e-1 |                         |     |       |       |    |    |    |   |   |   |   |  |
|               | AAL95032.1  Hypothetical protein                   |        |          |          |            |        |          |          |              |        |          |          |                |        |          |          |              |        |          |          |                |        |          |          |                         |     |       |       |    |    |    |   |   |   |   |  |
| <b>FN0837</b> |                                                    |        |          |          |            |        |          |          |              |        |          |          |                |        |          |          |              |        |          |          |                |        |          |          |                         |     |       |       |    |    |    |   |   |   |   |  |
|               | AAL95033.1  Integrase/recombinase                  |        |          |          |            |        |          |          |              |        |          |          |                |        |          |          |              |        |          |          |                |        |          |          |                         |     |       |       |    |    |    |   |   |   |   |  |
| <b>FN0846</b> | 0.094                                              | 13.359 | 1.674e-1 | 4.394e-1 | -0.255     | 13.195 | 1.815e-2 | 9.21e-2  | -1.032       | 12.029 | 1.323e-3 | 3.524e-3 | -1.126         | 12.326 | 1.663e-3 | 5.269e-4 | -0.348       | 13.288 | 3.225e-2 | 1.035e-2 | -0.778         | 12.163 | 1.024e-3 | 2e-3     |                         |     |       |       |    |    |    |   |   |   |   |  |
|               | AAL95042.1  Hypothetical Exported Protein          |        |          |          |            |        |          |          |              |        |          |          |                |        |          |          |              |        |          |          |                |        |          |          |                         |     |       |       |    |    |    |   |   |   |   |  |

Show detected proteins only  
 Show all proteins  
 Filter by category:

Proteins found: 1424

Enter (or paste) list of ORFs

Find ORFs

Test Cutoff

q-Value .005

p-Value

Dot Plots

| Signif | Direction | Applies To   |
|--------|-----------|--------------|
| yes    | +         | ratios, bars |
| no     | n/a       | bars         |
| yes    | -         | ratios, bars |
| yes    | +         | p-, q-Values |
| yes    | -         | p-, q-Values |

FnPg vs Fn — █ — FnSg vs Fn  
 FnPgSg vs Fn — █ — FnPgSg vs FnPg  
 FnSg vs FnPg — █ — FnPgSg vs FnSg

Fn Summary Table

FnPg vs Fn

FnSg vs Fn

FnPgSg vs Fn

FnPgSg vs FnPg

FnSg vs FnPg

FnPgSg vs FnSg

Fn Coverage

| ORF           | FnPg vs Fn                                           |        |          |          | FnSg vs Fn |        |          |          | FnPgSg vs Fn |        |          |          | FnPgSg vs FnPg |        |          |          | FnSg vs FnPg |        |          |          | FnPgSg vs FnSg |        |          |          | Log <sub>2</sub> Ratios |     |       |       |    |    |    |   |   |   |   |  |
|---------------|------------------------------------------------------|--------|----------|----------|------------|--------|----------|----------|--------------|--------|----------|----------|----------------|--------|----------|----------|--------------|--------|----------|----------|----------------|--------|----------|----------|-------------------------|-----|-------|-------|----|----|----|---|---|---|---|--|
|               | Ratio                                                | Sum    | q-Val    | p-Val    | Ratio      | Sum    | q-Val    | p-Val    | Ratio        | Sum    | q-Val    | p-Val    | Ratio          | Sum    | q-Val    | p-Val    | Ratio        | Sum    | q-Val    | p-Val    | Ratio          | Sum    | q-Val    | p-Val    | Ratio                   | Sum | q-Val | p-Val | -6 | -4 | -2 | 0 | 2 | 4 | 6 |  |
| <b>FN0847</b> | -1.659                                               | 7.659  |          |          | -1.184     | 8.319  | 7.413e-5 | 1.081e-4 | -1.892       | 7.222  | 1.49e-5  | 5.662e-6 | -0.233         | 5.767  |          |          | 0.475        | 6.660  |          |          | -0.708         | 6.427  | 4.613e-3 | 1.353e-2 |                         |     |       |       |    |    |    |   |   |   |   |  |
|               | AAL95043.1   TPR-repeat-containing proteins          |        |          |          |            |        |          |          |              |        |          |          |                |        |          |          |              |        |          |          |                |        |          |          |                         |     |       |       |    |    |    |   |   |   |   |  |
| <b>FN0848</b> |                                                      |        |          |          |            |        |          |          |              |        |          |          |                |        |          |          |              |        |          |          |                |        |          |          |                         |     |       |       |    |    |    |   |   |   |   |  |
|               | AAL95044.1   Hypothetical protein                    |        |          |          |            |        |          |          |              |        |          |          |                |        |          |          |              |        |          |          |                |        |          |          |                         |     |       |       |    |    |    |   |   |   |   |  |
| <b>FN0849</b> | 0.764                                                | 11.033 | 3.726e-3 | 3.018e-3 | 0.565      | 11.018 | 1.443e-3 | 4.635e-3 | -0.787       | 9.278  | 3.527e-3 | 1.196e-2 | -1.551         | 10.246 | 3.315e-6 | 7.371e-8 | -0.199       | 11.782 | 7.91e-2  | 5.276e-2 | -1.352         | 10.231 | 4.431e-4 | 6.356e-4 |                         |     |       |       |    |    |    |   |   |   |   |  |
|               | AAL95045.1   8-amino-7-oxononanoate synthase         |        |          |          |            |        |          |          |              |        |          |          |                |        |          |          |              |        |          |          |                |        |          |          |                         |     |       |       |    |    |    |   |   |   |   |  |
| <b>FN0850</b> | 0.248                                                | 9.184  | 1.255e-1 | 3.022e-1 | 1.012      | 10.133 | 2.691e-5 | 2.476e-5 | -1.330       | 7.402  | 1.025e-4 | 1.134e-4 | -1.578         | 7.854  | 1.143e-2 | 9.277e-3 | 0.764        | 10.380 | 3.355e-2 | 1.111e-2 | -2.342         | 8.803  | 3.762e-5 | 2.279e-5 |                         |     |       |       |    |    |    |   |   |   |   |  |
|               | AAL95046.1   Hypothetical cytosolic protein          |        |          |          |            |        |          |          |              |        |          |          |                |        |          |          |              |        |          |          |                |        |          |          |                         |     |       |       |    |    |    |   |   |   |   |  |
| <b>FN0853</b> | 0.961                                                | 12.611 | 6.882e-3 | 7.045e-3 | 0.915      | 12.750 | 1.01e-3  | 3.013e-3 | -0.782       | 10.665 | 6.092e-6 | 1.522e-6 | -1.742         | 11.830 | 4.891e-3 | 2.447e-3 | -0.045       | 13.711 | 3.647e-1 | 7.496e-1 | -1.697         | 11.969 | 6.011e-4 | 9.718e-4 |                         |     |       |       |    |    |    |   |   |   |   |  |
|               | AAL95049.1   Glycogen synthase                       |        |          |          |            |        |          |          |              |        |          |          |                |        |          |          |              |        |          |          |                |        |          |          |                         |     |       |       |    |    |    |   |   |   |   |  |
| <b>FN0854</b> | 1.630                                                | 13.097 | 4.36e-3  | 3.751e-3 | 1.493      | 13.145 | 4.839e-5 | 5.831e-5 | 0.226        | 11.489 | 3.804e-2 | 1.898e-1 | -1.404         | 13.323 | 6.587e-3 | 3.811e-3 | -0.137       | 14.775 | 2.379e-1 | 4.056e-1 | -1.267         | 13.371 | 5.758e-5 | 4.202e-5 |                         |     |       |       |    |    |    |   |   |   |   |  |
|               | AAL95050.1   Glucose-1-phosphate adenylyltransferase |        |          |          |            |        |          |          |              |        |          |          |                |        |          |          |              |        |          |          |                |        |          |          |                         |     |       |       |    |    |    |   |   |   |   |  |
| <b>FN0855</b> | 0.488                                                | 14.558 | 6.521e-2 | 1.302e-1 | 1.104      | 15.358 | 5.2e-5   | 6.425e-5 | -0.839       | 13.027 | 4.245e-7 | 3.817e-8 | -1.327         | 13.719 | 2.082e-2 | 2.247e-2 | 0.616        | 15.846 | 5.671e-2 | 2.86e-2  | -1.942         | 14.519 | 3.09e-5  | 1.691e-5 |                         |     |       |       |    |    |    |   |   |   |   |  |
|               | AAL95051.1   Glucose-1-phosphate adenylyltransferase |        |          |          |            |        |          |          |              |        |          |          |                |        |          |          |              |        |          |          |                |        |          |          |                         |     |       |       |    |    |    |   |   |   |   |  |
| <b>FN0856</b> | 1.224                                                | 13.568 | 1.528e-4 | 2.598e-5 | 0.971      | 13.500 | 1.32e-4  | 2.256e-4 | -0.627       | 11.514 | 7.566e-3 | 2.973e-2 | -1.851         | 12.942 | 1.324e-3 | 3.785e-4 | -0.253       | 14.724 | 4.334e-2 | 1.739e-2 | -1.598         | 12.873 | 7.824e-5 | 6.253e-5 |                         |     |       |       |    |    |    |   |   |   |   |  |
|               | AAL95052.1   1,4-alpha-glucan branching enzyme       |        |          |          |            |        |          |          |              |        |          |          |                |        |          |          |              |        |          |          |                |        |          |          |                         |     |       |       |    |    |    |   |   |   |   |  |
| <b>FN0857</b> | 0.317                                                | 15.822 | 9.16e-2  | 2.026e-1 | 0.743      | 16.433 | 5.978e-5 | 7.818e-5 | -0.346       | 14.955 | 3.947e-3 | 1.37e-2  | -0.663         | 15.476 | 3.839e-2 | 5.435e-2 | 0.426        | 16.750 | 8.631e-2 | 6.341e-2 | -1.089         | 16.087 | 3.235e-6 | 5.507e-7 |                         |     |       |       |    |    |    |   |   |   |   |  |
|               | AAL95053.1   Glycogen phosphorylase                  |        |          |          |            |        |          |          |              |        |          |          |                |        |          |          |              |        |          |          |                |        |          |          |                         |     |       |       |    |    |    |   |   |   |   |  |
| <b>FN0858</b> | 1.039                                                | 10.442 | 1.199e-3 | 6.356e-4 | 1.165      | 10.752 | 1.401e-2 | 6.904e-2 | -2.182       | 7.017  | 4.324e-4 | 8.285e-4 | -3.221         | 8.261  | 6.376e-4 | 1.248e-4 | 0.125        | 11.791 | 3.54e-1  | 7.155e-1 | -3.346         | 8.570  | 6.341e-3 | 2.025e-2 |                         |     |       |       |    |    |    |   |   |   |   |  |
|               | AAL95054.1   4-alpha-glucanotransferase              |        |          |          |            |        |          |          |              |        |          |          |                |        |          |          |              |        |          |          |                |        |          |          |                         |     |       |       |    |    |    |   |   |   |   |  |
| <b>FN0865</b> | 2.292                                                | 12.857 | 9.565e-2 | 2.144e-1 | 2.373      | 13.122 | 4.153e-6 | 1.431e-6 | -0.763       | 9.598  | 1.47e-2  | 6.369e-2 | -3.055         | 12.095 | 8.846e-2 | 1.809e-1 | 0.081        | 15.415 | 4.125e-1 | 9.168e-1 | -3.136         | 12.360 | 3.176e-6 | 5.356e-7 |                         |     |       |       |    |    |    |   |   |   |   |  |
|               | AAL95061.1   unknown                                 |        |          |          |            |        |          |          |              |        |          |          |                |        |          |          |              |        |          |          |                |        |          |          |                         |     |       |       |    |    |    |   |   |   |   |  |
| <b>FN0867</b> | -2.181                                               | 12.264 | 1.015e-4 | 1.38e-5  | -1.510     | 13.119 | 1.533e-6 | 3.026e-7 | -0.731       | 13.510 | 4.801e-5 | 3.853e-5 | 1.450          | 11.533 | 1.722e-3 | 5.555e-4 | 0.670        | 10.938 | 2.326e-2 | 5.917e-3 | 0.779          | 12.388 | 2.152e-4 | 2.424e-4 |                         |     |       |       |    |    |    |   |   |   |   |  |
|               | AAL95063.1   Long-chain-fatty-acid--CoA ligase       |        |          |          |            |        |          |          |              |        |          |          |                |        |          |          |              |        |          |          |                |        |          |          |                         |     |       |       |    |    |    |   |   |   |   |  |
| <b>FN0868</b> |                                                      |        |          |          | -0.117     | 6.117  |          |          |              |        |          |          |                |        |          |          |              |        |          |          |                |        |          |          |                         |     |       |       |    |    |    |   |   |   |   |  |
|               | AAL95064.1   ATPases of the PP superfamily           |        |          |          |            |        |          |          |              |        |          |          |                |        |          |          |              |        |          |          |                |        |          |          |                         |     |       |       |    |    |    |   |   |   |   |  |
| <b>FN0869</b> | -0.713                                               | 4.713  |          |          | 0.239      | 5.851  |          |          | -1.027       | 4.197  |          |          | -0.313         | 3.687  |          |          | 0.953        | 5.137  |          |          | -1.266         | 4.824  |          |          |                         |     |       |       |    |    |    |   |   |   |   |  |
|               | AAL95065.1   Hydrolase (HAD superfamily)             |        |          |          |            |        |          |          |              |        |          |          |                |        |          |          |              |        |          |          |                |        |          |          |                         |     |       |       |    |    |    |   |   |   |   |  |
| <b>FN0870</b> |                                                      |        |          |          |            |        |          |          | 0.817        | 6.040  |          |          |                |        |          |          |              |        |          |          |                |        |          |          |                         |     |       |       |    |    |    |   |   |   |   |  |
|               | AAL95066.1   Rhodanese-related sulfurtransferases    |        |          |          |            |        |          |          |              |        |          |          |                |        |          |          |              |        |          |          |                |        |          |          |                         |     |       |       |    |    |    |   |   |   |   |  |
| <b>FN0871</b> | 0.193                                                | 7.807  |          |          | -0.520     | 7.278  | 2.177e-2 | 1.125e-1 | -0.535       | 6.875  |          |          | -0.728         | 7.272  |          |          | -0.713       | 7.471  |          |          | -0.015         | 6.743  |          |          |                         |     |       |       |    |    |    |   |   |   |   |  |
|               | AAL95067.1   3-dehydroquinate synthase               |        |          |          |            |        |          |          |              |        |          |          |                |        |          |          |              |        |          |          |                |        |          |          |                         |     |       |       |    |    |    |   |   |   |   |  |
| <b>FN0873</b> | 1.534                                                | 10.390 | 7.542e-2 | 1.571e-1 | 1.275      | 10.316 | 2.23e-3  | 7.777e-3 | -0.043       | 8.609  | 1.209e-1 | 6.963e-1 | -1.577         | 10.347 | 7.887e-2 | 1.527e-1 | -0.259       | 11.850 | 3.409e-1 | 6.754e-1 | -1.318         | 10.273 | 3.073e-3 | 7.913e-3 |                         |     |       |       |    |    |    |   |   |   |   |  |
|               | AAL95069.1   Protease IV                             |        |          |          |            |        |          |          |              |        |          |          |                |        |          |          |              |        |          |          |                |        |          |          |                         |     |       |       |    |    |    |   |   |   |   |  |

Show detected proteins only  
 Show all proteins

Filter by category:  
GO: amino acid transport

Proteins found: 1424

Enter (or paste) list of ORFs

Find ORFs

Test Cutoff

q-Value p-Value

.005

Dot Plots

| Signif | Direction | Applies To   |
|--------|-----------|--------------|
| yes    | +         | ratios, bars |
| no     | n/a       | bars         |
| yes    | -         | ratios, bars |
| yes    | +         | p-, q-Values |
| yes    | -         | p-, q-Values |

FnPg vs Fn — █ — FnSg vs Fn

FnPgSg vs Fn — █ — FnPgSg vs FnPg

FnSg vs FnPg — █ — FnPgSg vs FnSg

| ORF           | FnPg vs Fn                                                    |        |          |          | FnSg vs Fn |        |          |          | FnPgSg vs Fn |        |          |          | FnPgSg vs FnPg |        |          |          | FnSg vs FnPg |        |          |          | FnPgSg vs FnSg |        |          |          | Log <sub>2</sub> Ratios |       |       |       |    |    |    |   |   |   |   |
|---------------|---------------------------------------------------------------|--------|----------|----------|------------|--------|----------|----------|--------------|--------|----------|----------|----------------|--------|----------|----------|--------------|--------|----------|----------|----------------|--------|----------|----------|-------------------------|-------|-------|-------|----|----|----|---|---|---|---|
|               | Ratio                                                         | Sum    | q-Val    | p-Val    | Ratio      | Sum    | q-Val    | p-Val    | Ratio        | Sum    | q-Val    | p-Val    | Ratio          | Sum    | q-Val    | p-Val    | Ratio        | Sum    | q-Val    | p-Val    | Ratio          | Sum    | q-Val    | p-Val    | Ratio                   | Sum   | q-Val | p-Val | -6 | -4 | -2 | 0 | 2 | 4 | 6 |
| <b>FN0874</b> |                                                               |        |          |          |            |        |          |          |              |        |          |          |                |        |          | -1.230   | 5.874        |        |          |          |                |        |          |          |                         |       |       |       |    |    |    |   |   |   |   |
|               | AAL95070.1   Phosphohydrolase (MUTT/NUDIX family protein)     |        |          |          |            |        |          |          |              |        |          |          |                |        |          |          |              |        |          |          |                |        |          |          |                         |       |       |       |    |    |    |   |   |   |   |
| <b>FN0875</b> |                                                               |        |          |          |            |        |          |          |              |        |          |          |                |        |          |          |              |        |          |          |                |        |          |          | -0.449                  | 5.481 |       |       |    |    |    |   |   |   |   |
|               | AAL95071.1   23S rRNA methyltransferase                       |        |          |          |            |        |          |          |              |        |          |          |                |        |          |          |              |        |          |          |                |        |          |          |                         |       |       |       |    |    |    |   |   |   |   |
| <b>FN0878</b> | -0.755                                                        | 8.025  | 4.545e-2 | 7.868e-2 | 0.183      | 9.147  | 5.429e-2 | 3.049e-1 | 0.358        | 8.934  | 1.732e-2 | 7.67e-2  | 1.112          | 8.383  | 1.551e-2 | 1.494e-2 | 0.937        | 8.392  | 6.663e-2 | 3.776e-2 | 0.175          | 9.505  | 2.076e-2 | 8.236e-2 |                         |       |       |       |    |    |    |   |   |   |   |
|               | AAL95074.1   Transcriptional regulator, GntR family           |        |          |          |            |        |          |          |              |        |          |          |                |        |          |          |              |        |          |          |                |        |          |          |                         |       |       |       |    |    |    |   |   |   |   |
| <b>FN0884</b> |                                                               |        |          |          |            |        |          |          |              |        |          |          |                |        |          |          |              |        |          |          |                |        |          |          |                         |       |       |       |    |    |    |   |   |   |   |
|               | AAL95079.1   Hemin transport system permease protein hmuU     |        |          |          |            |        |          |          |              |        |          |          |                |        |          |          |              |        |          |          |                |        |          |          |                         |       |       |       |    |    |    |   |   |   |   |
| <b>FN0885</b> |                                                               |        |          |          |            |        |          |          |              |        |          |          |                |        |          |          |              |        |          |          |                |        |          |          |                         |       |       |       |    |    |    |   |   |   |   |
|               | AAL95081.1   Hemin-binding periplasmic protein hmuT precursor |        |          |          |            |        |          |          |              |        |          |          |                |        |          |          |              |        |          |          |                |        |          |          |                         |       |       |       |    |    |    |   |   |   |   |
| <b>FN0886</b> |                                                               |        |          |          |            |        |          |          |              | -2.221 | 5.391    |          |                |        |          |          |              |        |          |          |                |        |          |          |                         |       |       |       |    |    |    |   |   |   |   |
|               | AAL95082.1   Hemin receptor                                   |        |          |          |            |        |          |          |              |        |          |          |                |        |          |          |              |        |          |          |                |        |          |          |                         |       |       |       |    |    |    |   |   |   |   |
| <b>FN0887</b> | -1.252                                                        | 11.062 | 2.731e-3 | 1.965e-3 | -1.043     | 11.455 | 8.556e-6 | 4.576e-6 | -0.665       | 11.445 | 1.368e-3 | 3.7e-3   | 0.587          | 10.397 | 3.454e-2 | 4.699e-2 | 0.209        | 10.204 | 2.359e-1 | 4.001e-1 | 0.378          | 10.791 | 1.65e-2  | 6.304e-2 |                         |       |       |       |    |    |    |   |   |   |   |
|               | AAL95083.1   Oligoendopeptidase F                             |        |          |          |            |        |          |          |              |        |          |          |                |        |          |          |              |        |          |          |                |        |          |          |                         |       |       |       |    |    |    |   |   |   |   |
| <b>FN0888</b> | -1.032                                                        | 9.253  | 3.171e-3 | 2.428e-3 |            |        |          |          | -0.277       | 9.804  | 4.042e-2 | 2.037e-1 | 0.754          | 8.976  | 3.335e-2 | 4.452e-2 |              |        |          |          |                |        |          |          |                         |       |       |       |    |    |    |   |   |   |   |
|               | AAL95084.1   Uracil permease                                  |        |          |          |            |        |          |          |              |        |          |          |                |        |          |          |              |        |          |          |                |        |          |          |                         |       |       |       |    |    |    |   |   |   |   |
| <b>FN0889</b> | 1.569                                                         | 8.230  | 9.02e-2  | 1.987e-1 | -0.253     | 6.592  |          |          |              |        |          |          |                |        |          |          |              | -1.822 | 8.162    |          |                |        |          |          |                         |       |       |       |    |    |    |   |   |   |   |
|               | AAL95085.1   hypothetical protein                             |        |          |          |            |        |          |          |              |        |          |          |                |        |          |          |              |        |          |          |                |        |          |          |                         |       |       |       |    |    |    |   |   |   |   |
| <b>FN0892</b> |                                                               |        |          |          |            |        |          |          |              |        |          |          |                |        |          |          |              |        |          |          |                |        |          |          |                         |       |       |       |    |    |    |   |   |   |   |
|               | AAL95088.1   Phosphoserine phosphatase                        |        |          |          |            |        |          |          |              |        |          |          |                |        |          |          |              |        |          |          |                |        |          |          |                         |       |       |       |    |    |    |   |   |   |   |
| <b>FN0893</b> | -1.479                                                        | 7.093  |          |          | -0.571     | 8.186  |          |          | -0.745       | 7.623  | 5.864e-3 | 2.207e-2 | 0.733          | 6.348  |          |          | 0.908        | 6.707  |          |          | -0.174         | 7.440  |          |          |                         |       |       |       |    |    |    |   |   |   |   |
|               | AAL95089.1   Hypothetical protein                             |        |          |          |            |        |          |          |              |        |          |          |                |        |          |          |              |        |          |          |                |        |          |          |                         |       |       |       |    |    |    |   |   |   |   |
| <b>FN0896</b> | -0.599                                                        | 8.237  | 6.117e-2 | 1.193e-1 | -1.044     | 7.977  | 1.496e-4 | 2.678e-4 | -0.412       | 8.220  | 1.307e-2 | 5.572e-2 | 0.187          | 7.824  | 2.098e-1 | 6.365e-1 | -0.444       | 7.378  | 2.198e-1 | 3.593e-1 | 0.631          | 7.565  | 1.248e-2 | 4.56e-2  |                         |       |       |       |    |    |    |   |   |   |   |
|               | AAL95092.1   Hypothetical protein                             |        |          |          |            |        |          |          |              |        |          |          |                |        |          |          |              |        |          |          |                |        |          |          |                         |       |       |       |    |    |    |   |   |   |   |
| <b>FN0898</b> |                                                               |        |          |          |            |        |          |          |              |        |          |          |                |        |          |          |              | 0.373  | 5.202    |          |                |        |          |          |                         |       |       |       |    |    |    |   |   |   |   |
|               | AAL95094.1   Hypothetical protein                             |        |          |          |            |        |          |          |              |        |          |          |                |        |          |          |              |        |          |          |                |        |          |          |                         |       |       |       |    |    |    |   |   |   |   |
| <b>FN0900</b> | -0.025                                                        | 5.001  | 2.996e-1 | 9.537e-1 | 1.716      | 6.927  |          |          |              |        |          |          |                |        |          |          |              | 1.742  | 6.902    |          |                |        |          |          |                         |       |       |       |    |    |    |   |   |   |   |
|               | AAL95096.1   Metal dependent hydrolase                        |        |          |          |            |        |          |          |              |        |          |          |                |        |          |          |              |        |          |          |                |        |          |          |                         |       |       |       |    |    |    |   |   |   |   |
| <b>FN0901</b> | 0.456                                                         | 5.883  |          |          | 1.053      | 6.665  |          |          |              |        |          |          |                |        |          |          |              | 0.597  | 7.121    |          |                |        |          |          |                         |       |       |       |    |    |    |   |   |   |   |
|               | AAL95097.1   DNA polymerase, bacteriophage-type               |        |          |          |            |        |          |          |              |        |          |          |                |        |          |          |              |        |          |          |                |        |          |          |                         |       |       |       |    |    |    |   |   |   |   |
| <b>FN0902</b> |                                                               |        |          |          |            |        |          |          |              |        |          |          |                |        |          |          |              |        |          |          |                |        |          |          |                         |       |       |       |    |    |    |   |   |   |   |
|               | AAL95098.1   5-formyltetrahydrofolate cyclo-ligase            |        |          |          |            |        |          |          |              |        |          |          |                |        |          |          |              |        |          |          |                |        |          |          |                         |       |       |       |    |    |    |   |   |   |   |
| <b>FN0903</b> | 0.985                                                         | 8.149  | 1.034e-2 | 1.181e-2 | 0.982      | 8.331  | 4.677e-4 | 1.124e-3 | 0.458        | 7.418  | 3.434e-3 | 1.158e-2 | -0.527         | 8.607  | 2.865e-2 | 3.556e-2 | -0.003       | 9.315  | 4.299e-1 | 9.845e-1 | -0.524         | 8.788  | 7.871e-4 | 1.408e-3 |                         |       |       |       |    |    |    |   |   |   |   |
|               | AAL95099.1   Polysialic acid capsule expression protein kpsF  |        |          |          |            |        |          |          |              |        |          |          |                |        |          |          |              |        |          |          |                |        |          |          |                         |       |       |       |    |    |    |   |   |   |   |

Show detected proteins only  
 Show all proteins  
 Filter by category:

Proteins found: 1424

Enter (or paste) list of ORFs

**Test**      **Cutoff**

q-Value      .005

p-Value

Dot Plots  
 Dot Plots

| Signif | Direction | Applies To   |
|--------|-----------|--------------|
| yes    | +         | ratios, bars |
| no     | n/a       | bars         |
| yes    | -         | ratios, bars |
| yes    | +         | p-, q-Values |
| yes    | -         | p-, q-Values |

FnPg vs Fn ■      FnSg vs Fn ■  
 FnPgSg vs FnPg ■      FnPgSg vs FnPg ■  
 FnSg vs FnPg ■      FnPgSg vs FnSg ■

Fn Summary Table

FnPg vs Fn

FnSg vs Fn

FnPgSg vs Fn

FnPgSg vs FnPg

FnSg vs FnPg

FnPgSg vs FnSg

Fn Coverage

| ORF           | FnPg vs Fn                                                                          |        |          |          | FnSg vs Fn |        |          |          | FnPgSg vs Fn |        |          |          | FnPgSg vs FnPg |        |          |          | FnSg vs FnPg |        |          |          | FnPgSg vs FnSg |        |          |          | Log <sub>2</sub> Ratios |     |       |       |    |    |    |   |   |   |   |
|---------------|-------------------------------------------------------------------------------------|--------|----------|----------|------------|--------|----------|----------|--------------|--------|----------|----------|----------------|--------|----------|----------|--------------|--------|----------|----------|----------------|--------|----------|----------|-------------------------|-----|-------|-------|----|----|----|---|---|---|---|
|               | Ratio                                                                               | Sum    | q-Val    | p-Val    | Ratio      | Sum    | q-Val    | p-Val    | Ratio        | Sum    | q-Val    | p-Val    | Ratio          | Sum    | q-Val    | p-Val    | Ratio        | Sum    | q-Val    | p-Val    | Ratio          | Sum    | q-Val    | p-Val    | Ratio                   | Sum | q-Val | p-Val | -6 | -4 | -2 | 0 | 2 | 4 | 6 |
| <b>FN0904</b> | AAL95100.1   NAD(FAD)-utilizing dehydrogenases                                      |        |          |          |            |        |          |          |              |        |          |          |                |        |          |          |              |        |          |          |                |        |          |          |                         |     |       |       |    |    |    |   |   |   |   |
| <b>FN0905</b> |                                                                                     |        |          |          |            |        |          |          | -0.658       | 7.805  | 1.363e-4 | 1.691e-4 |                |        |          |          |              |        |          |          |                |        |          |          |                         |     |       |       |    |    |    |   |   |   |   |
| <b>FN0906</b> | AAL95101.1   Hypothetical protein                                                   |        |          |          |            |        |          |          |              |        |          |          |                |        |          |          |              |        |          |          |                |        |          |          |                         |     |       |       |    |    |    |   |   |   |   |
| <b>FN0906</b> | -0.153                                                                              | 9.234  | 8.966e-2 | 1.971e-1 | 0.421      | 9.992  | 3.309e-3 | 1.269e-2 | -1.134       | 8.049  | 5.811e-4 | 1.208e-3 | -0.981         | 8.100  | 3.369e-3 | 1.468e-3 | 0.573        | 9.839  | 1.33e-2  | 2.589e-3 | -1.555         | 8.858  | 7.235e-5 | 5.64e-5  |                         |     |       |       |    |    |    |   |   |   |   |
| <b>FN0908</b> | AAL95102.1   Glycerol-3-phosphate dehydrogenase [NAD(P)+]                           |        |          |          |            |        |          |          |              |        |          |          |                |        |          |          |              |        |          |          |                |        |          |          |                         |     |       |       |    |    |    |   |   |   |   |
| <b>FN0908</b> | -0.956                                                                              | 8.770  |          |          | -1.015     | 8.896  | 5.304e-4 | 1.328e-3 | -0.797       | 8.726  | 1.811e-3 | 5.357e-3 | 0.159          | 7.973  |          |          | -0.058       | 7.940  |          |          | 0.218          | 8.099  | 9.648e-2 | 4.619e-1 |                         |     |       |       |    |    |    |   |   |   |   |
| <b>FN0909</b> | AAL95104.1   Tpl protein                                                            |        |          |          |            |        |          |          |              |        |          |          |                |        |          |          |              |        |          |          |                |        |          |          |                         |     |       |       |    |    |    |   |   |   |   |
| <b>FN0909</b> | AAL95105.1   DNA repair protein radC                                                |        |          |          |            |        |          |          |              |        |          |          |                |        |          |          |              |        |          |          |                |        |          |          |                         |     |       |       |    |    |    |   |   |   |   |
| <b>FN0910</b> | 0.050                                                                               | 5.950  |          |          | -0.352     | 5.732  | 9.654e-2 | 5.678e-1 |              |        |          |          |                |        |          |          | -0.402       | 5.782  |          |          |                |        |          |          |                         |     |       |       |    |    |    |   |   |   |   |
| <b>FN0911</b> | AAL95106.1   Nicotinate-nucleotide--dimethylbenzimidazole phosphoribosyltransferase |        |          |          |            |        |          |          |              |        |          |          |                |        |          |          |              |        |          |          |                |        |          |          |                         |     |       |       |    |    |    |   |   |   |   |
| <b>FN0911</b> | -0.258                                                                              | 6.598  |          |          | -0.764     | 6.276  | 1.296e-3 | 4.076e-3 | -0.519       | 6.133  |          |          | -0.261         | 6.079  |          |          | -0.506       | 6.018  |          |          | 0.246          | 5.757  |          |          |                         |     |       |       |    |    |    |   |   |   |   |
| <b>FN0912</b> | AAL95107.1   Alpha-ribazole-5'-phosphate phosphatase                                |        |          |          |            |        |          |          |              |        |          |          |                |        |          |          |              |        |          |          |                |        |          |          |                         |     |       |       |    |    |    |   |   |   |   |
| <b>FN0912</b> | AAL95108.1   Cobalamin [5'-phosphate] synthase                                      |        |          |          |            |        |          |          |              |        |          |          |                |        |          |          |              |        |          |          |                |        |          |          |                         |     |       |       |    |    |    |   |   |   |   |
| <b>FN0913</b> | 0.177                                                                               | 6.466  |          |          | -0.237     | 6.237  |          |          | -1.458       | 4.628  |          |          | -1.635         | 5.009  |          |          | -0.414       | 6.414  |          |          | -1.221         | 4.779  |          |          |                         |     |       |       |    |    |    |   |   |   |   |
| <b>FN0913</b> | AAL95109.1   Cobinamide kinase                                                      |        |          |          |            |        |          |          |              |        |          |          |                |        |          |          |              |        |          |          |                |        |          |          |                         |     |       |       |    |    |    |   |   |   |   |
| <b>FN0915</b> | 0.563                                                                               | 10.087 | 1.446e-1 | 3.619e-1 | 1.056      | 10.765 | 3.335e-3 | 1.282e-2 | 0.092        | 9.413  | 1.574e-3 | 4.491e-3 | -0.471         | 10.179 | 1.562e-1 | 4.232e-1 | 0.493        | 11.328 | 1.881e-1 | 2.829e-1 | -0.964         | 10.857 | 5.083e-3 | 1.535e-2 |                         |     |       |       |    |    |    |   |   |   |   |
| <b>FN0915</b> | AAL95111.1   PTS system, N-acetylglucosamine-specific IIA component                 |        |          |          |            |        |          |          |              |        |          |          |                |        |          |          |              |        |          |          |                |        |          |          |                         |     |       |       |    |    |    |   |   |   |   |
| <b>FN0916</b> | -0.426                                                                              | 14.600 | 6.671e-2 | 1.341e-1 | -0.058     | 15.153 | 8.072e-2 | 4.666e-1 | 0.625        | 15.448 | 5.657e-3 | 2.116e-2 | 1.052          | 15.226 | 7.365e-3 | 4.589e-3 | 0.368        | 14.727 | 1.485e-1 | 1.858e-1 | 0.683          | 15.778 | 5.564e-3 | 1.721e-2 |                         |     |       |       |    |    |    |   |   |   |   |
| <b>FN0916</b> | AAL95112.1   Hypothetical Exported Protein                                          |        |          |          |            |        |          |          |              |        |          |          |                |        |          |          |              |        |          |          |                |        |          |          |                         |     |       |       |    |    |    |   |   |   |   |
| <b>FN0917</b> | -1.434                                                                              | 5.434  |          |          | 0.180      | 7.233  | 1.004e-1 | 5.928e-1 | -1.390       | 5.275  |          |          | 0.044          | 4.044  |          |          | 1.614        | 5.799  |          |          | -1.570         | 5.843  |          |          |                         |     |       |       |    |    |    |   |   |   |   |
| <b>FN0917</b> | AAL95113.1   Hypothetical protein                                                   |        |          |          |            |        |          |          |              |        |          |          |                |        |          |          |              |        |          |          |                |        |          |          |                         |     |       |       |    |    |    |   |   |   |   |
| <b>FN0920</b> | 0.123                                                                               | 6.521  |          |          |            |        |          |          | -0.352       | 5.842  |          |          | -0.475         | 6.169  |          |          |              |        |          |          |                |        |          |          |                         |     |       |       |    |    |    |   |   |   |   |
| <b>FN0920</b> | AAL95116.1   Protease HTPX                                                          |        |          |          |            |        |          |          |              |        |          |          |                |        |          |          |              |        |          |          |                |        |          |          |                         |     |       |       |    |    |    |   |   |   |   |
| <b>FN0921</b> | 2.442                                                                               | 8.542  |          |          | 1.838      | 8.123  | 1.24e-4  | 2.07e-4  | 0.422        | 6.319  | 4.465e-2 | 2.278e-1 | -2.019         | 8.964  |          |          | -0.604       | 10.565 |          |          | -1.416         | 8.545  | 2.97e-4  | 3.811e-4 |                         |     |       |       |    |    |    |   |   |   |   |
| <b>FN0921</b> | AAL95117.1   Hypothetical protein                                                   |        |          |          |            |        |          |          |              |        |          |          |                |        |          |          |              |        |          |          |                |        |          |          |                         |     |       |       |    |    |    |   |   |   |   |
| <b>FN0922</b> | AAL95118.1   Homoserine kinase                                                      |        |          |          |            |        |          |          |              |        |          |          |                |        |          |          |              |        |          |          |                |        |          |          |                         |     |       |       |    |    |    |   |   |   |   |
| <b>FN0923</b> | AAL95119.1   Cardiolipin synthetase                                                 |        |          |          |            |        |          |          |              |        |          |          |                |        |          |          |              |        |          |          |                |        |          |          |                         |     |       |       |    |    |    |   |   |   |   |
| <b>FN0924</b> | AAL95120.1   Hypothetical protein                                                   |        |          |          |            |        |          |          |              |        |          |          |                |        |          |          |              |        |          |          |                |        |          |          |                         |     |       |       |    |    |    |   |   |   |   |

Show detected proteins only  
 Show all proteins  
 Filter by category:

Proteins found: 1424

Enter (or paste) list of ORFs

Find ORFs

Test Cutoff

q-Value .005

p-Value

Dot Plots

| Signif | Direction | Applies To   |
|--------|-----------|--------------|
| yes    | +         | ratios, bars |
| no     | n/a       | bars         |
| yes    | -         | ratios, bars |
| yes    | +         | p-, q-Values |
| yes    | -         |              |

FnPg vs Fn — █ — FnSg vs Fn  
 FnPgSg vs Fn — █ — FnPgSg vs FnPg  
 FnSg vs FnPg — █ — FnPgSg vs FnSg

Fn Summary Table

FnPg vs Fn

FnSg vs Fn

FnPgSg vs Fn

FnPgSg vs FnPg

FnSg vs FnPg

FnPgSg vs FnSg

Fn Coverage

| ORF                                                       | FnPg vs Fn |        |          |          | FnSg vs Fn |        |          |          | FnPgSg vs Fn |        |          |          | FnPgSg vs FnPg |        |          |          | FnSg vs FnPg |        |          |          | FnPgSg vs FnSg |        |          |          | Log <sub>2</sub> Ratios |     |       |       |    |    |    |   |   |   |   |  |
|-----------------------------------------------------------|------------|--------|----------|----------|------------|--------|----------|----------|--------------|--------|----------|----------|----------------|--------|----------|----------|--------------|--------|----------|----------|----------------|--------|----------|----------|-------------------------|-----|-------|-------|----|----|----|---|---|---|---|--|
|                                                           | Ratio      | Sum    | q-Val    | p-Val    | Ratio      | Sum    | q-Val    | p-Val    | Ratio        | Sum    | q-Val    | p-Val    | Ratio          | Sum    | q-Val    | p-Val    | Ratio        | Sum    | q-Val    | p-Val    | Ratio          | Sum    | q-Val    | p-Val    | Ratio                   | Sum | q-Val | p-Val | -6 | -4 | -2 | 0 | 2 | 4 | 6 |  |
| <b>FN0925</b>                                             | -1.009     | 6.179  |          |          | -0.349     | 7.023  | 7.453e-2 | 4.28e-1  | -0.431       | 6.553  | 2.228e-2 | 1.019e-1 | 0.578          | 5.748  |          |          | 0.660        | 6.014  |          |          | -0.082         | 6.592  | 1.654e-1 | 8.574e-1 |                         |     |       |       |    |    |    |   |   |   |   |  |
| AAL95121.1   Hypothetical protein                         |            |        |          |          |            |        |          |          |              |        |          |          |                |        |          |          |              |        |          |          |                |        |          |          |                         |     |       |       |    |    |    |   |   |   |   |  |
| <b>FN0926</b>                                             | 2.552      | 8.283  |          |          | 2.328      | 8.244  |          |          | 0.381        | 5.908  |          |          | -2.171         | 8.664  | 1.13e-4  | 1.085e-5 | -0.223       | 10.796 | 1e-3     | 2.979e-5 | -1.947         | 8.625  | 5.59e-5  | 4.037e-5 |                         |     |       |       |    |    |    |   |   |   |   |  |
| AAL95122.1   GTP pyrophosphokinase                        |            |        |          |          |            |        |          |          |              |        |          |          |                |        |          |          |              |        |          |          |                |        |          |          |                         |     |       |       |    |    |    |   |   |   |   |  |
| <b>FN0928</b>                                             | 0.234      | 6.410  |          |          | -0.189     | 6.172  |          |          | -0.420       | 5.552  |          |          | -0.654         | 5.990  |          |          | -0.423       | 6.406  |          |          | -0.231         | 5.752  | 1.363e-1 | 6.826e-1 |                         |     |       |       |    |    |    |   |   |   |   |  |
| AAL95124.1   O-sialoglycoprotein endopeptidase            |            |        |          |          |            |        |          |          |              |        |          |          |                |        |          |          |              |        |          |          |                |        |          |          |                         |     |       |       |    |    |    |   |   |   |   |  |
| <b>FN0929</b>                                             |            |        |          |          |            |        |          |          |              |        |          |          | -1.182         | 7.271  |          |          | 0.453        | 9.091  | 2.564e-2 | 7.001e-3 | -1.635         | 7.908  |          |          |                         |     |       |       |    |    |    |   |   |   |   |  |
| AAL95125.1   ATP/GTP hydrolase                            |            |        |          |          |            |        |          |          |              |        |          |          |                |        |          |          |              |        |          |          |                |        |          |          |                         |     |       |       |    |    |    |   |   |   |   |  |
| <b>FN0930</b>                                             | -1.586     | 6.895  | 6.277e-3 | 6.195e-3 | -2.011     | 6.654  |          |          |              |        |          |          |                |        |          |          | -0.425       | 5.068  |          |          |                |        |          |          |                         |     |       |       |    |    |    |   |   |   |   |  |
| AAL95126.1   Glycerol-3-phosphate cytidyltransferase      |            |        |          |          |            |        |          |          |              |        |          |          |                |        |          |          |              |        |          |          |                |        |          |          |                         |     |       |       |    |    |    |   |   |   |   |  |
| <b>FN0932</b>                                             | -0.282     | 8.096  |          |          | -0.123     | 8.440  | 1.146e-1 | 6.879e-1 | -1.612       | 6.563  | 8.808e-5 | 8.998e-5 | -1.329         | 6.485  |          |          | 0.159        | 8.158  |          |          | -1.489         | 6.828  | 1.288e-2 | 4.732e-2 |                         |     |       |       |    |    |    |   |   |   |   |  |
| AAL95128.1   Hypothetical protein                         |            |        |          |          |            |        |          |          |              |        |          |          |                |        |          |          |              |        |          |          |                |        |          |          |                         |     |       |       |    |    |    |   |   |   |   |  |
| <b>FN0933</b>                                             |            |        |          |          |            |        |          |          |              |        |          |          |                |        |          |          |              |        |          |          |                |        |          |          |                         |     |       |       |    |    |    |   |   |   |   |  |
| AAL95129.1   3-phosphoshikimate 1-carboxyvinyltransferase |            |        |          |          |            |        |          |          |              |        |          |          |                |        |          |          |              |        |          |          |                |        |          |          |                         |     |       |       |    |    |    |   |   |   |   |  |
| <b>FN0934</b>                                             | 1.256      | 7.529  |          |          | 1.772      | 8.230  | 2.848e-3 | 1.051e-2 |              |        |          |          |                |        |          |          | 0.517        | 9.486  |          |          |                |        |          |          |                         |     |       |       |    |    |    |   |   |   |   |  |
| AAL95130.1   Chorismate synthase                          |            |        |          |          |            |        |          |          |              |        |          |          |                |        |          |          |              |        |          |          |                |        |          |          |                         |     |       |       |    |    |    |   |   |   |   |  |
| <b>FN0938</b>                                             |            |        |          |          |            |        |          |          |              |        |          |          |                |        |          |          | -0.128       | 11.165 |          |          |                |        |          |          |                         |     |       |       |    |    |    |   |   |   |   |  |
| AAL95134.1   Hypothetical protein                         |            |        |          |          |            |        |          |          |              |        |          |          |                |        |          |          |              |        |          |          |                |        |          |          |                         |     |       |       |    |    |    |   |   |   |   |  |
| <b>FN0940</b>                                             |            |        |          |          |            |        |          |          |              |        |          |          | -1.827         | 8.888  |          |          | -1.050       | 9.850  |          |          | -0.777         | 8.022  | 3.662e-3 | 9.905e-3 |                         |     |       |       |    |    |    |   |   |   |   |  |
| AAL95136.1   Hypothetical protein                         |            |        |          |          |            |        |          |          |              |        |          |          |                |        |          |          |              |        |          |          |                |        |          |          |                         |     |       |       |    |    |    |   |   |   |   |  |
| <b>FN0941</b>                                             | 1.593      | 10.529 | 3.764e-3 | 3.06e-3  | 0.983      | 10.104 | 7.167e-3 | 3.159e-2 | 0.493        | 9.225  | 3.183e-3 | 1.059e-2 | -1.101         | 11.022 | 6.863e-3 | 4.075e-3 | -0.610       | 11.697 | 5.384e-2 | 2.631e-2 | -0.490         | 10.596 | 2.751e-2 | 1.13e-1  |                         |     |       |       |    |    |    |   |   |   |   |  |
| AAL95137.1   Gamma-glutamyltranspeptidase                 |            |        |          |          |            |        |          |          |              |        |          |          |                |        |          |          |              |        |          |          |                |        |          |          |                         |     |       |       |    |    |    |   |   |   |   |  |
| <b>FN0943</b>                                             | 1.943      | 8.232  |          |          | 1.376      | 7.849  | 8.893e-3 | 4.065e-2 | -0.898       | 5.187  | 1.816e-4 | 2.518e-4 | -2.841         | 7.334  |          |          | -0.567       | 9.792  |          |          | -2.274         | 6.951  | 6.423e-3 | 2.057e-2 |                         |     |       |       |    |    |    |   |   |   |   |  |
| AAL95139.1   Sensory Transduction Protein Kinase          |            |        |          |          |            |        |          |          |              |        |          |          |                |        |          |          |              |        |          |          |                |        |          |          |                         |     |       |       |    |    |    |   |   |   |   |  |
| <b>FN0944</b>                                             |            |        |          |          |            |        |          |          |              |        |          |          |                |        |          |          |              |        |          |          |                |        |          |          |                         |     |       |       |    |    |    |   |   |   |   |  |
| AAL95140.1   Na <sup>+</sup> driven multidrug efflux pump |            |        |          |          |            |        |          |          |              |        |          |          |                |        |          |          |              |        |          |          |                |        |          |          |                         |     |       |       |    |    |    |   |   |   |   |  |
| <b>FN0947</b>                                             | -0.292     | 12.982 | 1.46e-1  | 3.666e-1 | -1.150     | 12.309 | 8.938e-4 | 2.6e-3   | 0.067        | 13.138 | 1.119e-1 | 6.376e-1 | 0.359          | 13.050 | 1.111e-1 | 2.599e-1 | -0.858       | 12.017 | 1.148e-1 | 1.099e-1 | 1.217          | 12.376 | 2.641e-4 | 3.269e-4 |                         |     |       |       |    |    |    |   |   |   |   |  |
| AAL95143.1   Hypothetical protein                         |            |        |          |          |            |        |          |          |              |        |          |          |                |        |          |          |              |        |          |          |                |        |          |          |                         |     |       |       |    |    |    |   |   |   |   |  |
| <b>FN0949</b>                                             | -1.101     | 15.535 | 5.008e-2 | 8.975e-2 | -2.512     | 14.308 | 4.18e-5  | 4.698e-5 | -0.722       | 15.710 | 1.517e-4 | 1.958e-4 | 0.379          | 14.813 | 1.925e-1 | 5.644e-1 | -1.411       | 13.207 | 1.839e-1 | 2.72e-1  | 1.790          | 13.586 | 6.204e-6 | 1.333e-6 |                         |     |       |       |    |    |    |   |   |   |   |  |
| AAL95145.1   DNA helicase                                 |            |        |          |          |            |        |          |          |              |        |          |          |                |        |          |          |              |        |          |          |                |        |          |          |                         |     |       |       |    |    |    |   |   |   |   |  |
| <b>FN0951</b>                                             | -0.699     | 7.680  | 6.285e-2 | 1.24e-1  | -1.474     | 7.089  |          |          |              |        |          |          |                |        |          |          | -0.775       | 6.390  |          |          |                |        |          |          |                         |     |       |       |    |    |    |   |   |   |   |  |
| AAL95147.1   Precorrin-3B C17-methyltransferase           |            |        |          |          |            |        |          |          |              |        |          |          |                |        |          |          |              |        |          |          |                |        |          |          |                         |     |       |       |    |    |    |   |   |   |   |  |
| <b>FN0952</b>                                             |            |        |          |          |            |        |          |          |              |        |          |          |                |        |          |          |              |        |          |          |                |        |          |          |                         |     |       |       |    |    |    |   |   |   |   |  |
| AAL95148.1   Cobalamin biosynthesis protein G             |            |        |          |          |            |        |          |          |              |        |          |          |                |        |          |          |              |        |          |          |                |        |          |          |                         |     |       |       |    |    |    |   |   |   |   |  |

Show detected proteins only  
 Show all proteins  
 Filter by category:

Proteins found: 1424

Enter (or paste) list of ORFs

Find ORFs

Test Cutoff

q-Value p-Value

.005

Dot Plots

Dot Plots

| Signif | Direction | Applies To   |
|--------|-----------|--------------|
| yes    | +         | ratios, bars |
| no     | n/a       | bars         |
| yes    | -         | ratios, bars |
| yes    | +         | p-, q-Values |
| yes    | -         | p-, q-Values |

FnPg vs Fn — █ — Fn vs Fn  
 FnPgSg vs Fn — █ — FnPgSg vs FnPg  
 FnSg vs FnPg — █ — FnPgSg vs FnSg  
 FnPgSg vs FnSg — █ — FnPgSg vs FnSg

Fn Summary Table

FnPg vs Fn

FnSg vs Fn

FnPgSg vs Fn

FnPgSg vs FnPg

FnSg vs FnPg

FnPgSg vs FnSg

Fn Coverage

| ORF           | FnPg vs Fn                                                            |        |          |          | FnSg vs Fn |        |          |          | FnPgSg vs Fn |        |          |          | FnPgSg vs FnPg |        |          |          | FnSg vs FnPg |        |          |          | FnPgSg vs FnSg |        |          |          | Log <sub>2</sub> Ratios |     |       |       |    |    |    |   |   |   |   |  |
|---------------|-----------------------------------------------------------------------|--------|----------|----------|------------|--------|----------|----------|--------------|--------|----------|----------|----------------|--------|----------|----------|--------------|--------|----------|----------|----------------|--------|----------|----------|-------------------------|-----|-------|-------|----|----|----|---|---|---|---|--|
|               | Ratio                                                                 | Sum    | q-Val    | p-Val    | Ratio      | Sum    | q-Val    | p-Val    | Ratio        | Sum    | q-Val    | p-Val    | Ratio          | Sum    | q-Val    | p-Val    | Ratio        | Sum    | q-Val    | p-Val    | Ratio          | Sum    | q-Val    | p-Val    | Ratio                   | Sum | q-Val | p-Val | -6 | -4 | -2 | 0 | 2 | 4 | 6 |  |
| <b>FN0957</b> | 0.610                                                                 | 8.568  | 5.36e-2  | 9.857e-2 | -0.807     | 7.335  | 1.344e-2 | 6.575e-2 | 0.546        | 8.300  | 2.589e-2 | 1.21e-1  | -0.064         | 9.114  | 2.587e-1 | 8.367e-1 | -1.418       | 7.945  | 3.972e-2 | 1.487e-2 | 1.354          | 7.881  | 5.589e-3 | 1.731e-2 |                         |     |       |       |    |    |    |   |   |   |   |  |
|               | AAL95153.1  Precorrin-4 C11-methyltransferase                         |        |          |          |            |        |          |          |              |        |          |          |                |        |          |          |              |        |          |          |                |        |          |          |                         |     |       |       |    |    |    |   |   |   |   |  |
| <b>FN0958</b> | 0.088                                                                 | 9.464  |          |          | -1.973     | 7.588  |          |          |              |        |          |          |                |        |          |          | -2.061       | 7.676  |          |          |                |        |          |          |                         |     |       |       |    |    |    |   |   |   |   |  |
|               | AAL95154.1  unknown                                                   |        |          |          |            |        |          |          |              |        |          |          |                |        |          |          |              |        |          |          |                |        |          |          |                         |     |       |       |    |    |    |   |   |   |   |  |
| <b>FN0959</b> | -1.417                                                                | 8.838  | 6.722e-3 | 6.814e-3 | -2.898     | 7.542  |          |          | -1.205       | 8.846  | 2.769e-3 | 8.945e-3 | 0.212          | 7.633  | 2.124e-1 | 6.467e-1 | -1.481       | 6.125  |          |          | 1.692          | 6.336  |          |          |                         |     |       |       |    |    |    |   |   |   |   |  |
|               | AAL95155.1  Precorrin-2 C20-methyltransferase                         |        |          |          |            |        |          |          |              |        |          |          |                |        |          |          |              |        |          |          |                |        |          |          |                         |     |       |       |    |    |    |   |   |   |   |  |
| <b>FN0961</b> | 1.043                                                                 | 6.383  | 5.123e-2 | 9.257e-2 | 1.938      | 7.463  |          |          |              |        |          |          |                |        |          |          | 0.896        | 8.505  |          |          |                |        |          |          |                         |     |       |       |    |    |    |   |   |   |   |  |
|               | AAL95157.1  Hypothetical protein                                      |        |          |          |            |        |          |          |              |        |          |          |                |        |          |          |              |        |          |          |                |        |          |          |                         |     |       |       |    |    |    |   |   |   |   |  |
| <b>FN0962</b> | -0.529                                                                | 10.719 | 3.717e-3 | 3.008e-3 | -1.888     | 9.545  | 1.759e-5 | 1.358e-5 | -1.249       | 9.795  | 3.758e-5 | 2.628e-5 | -0.721         | 9.470  | 7.793e-3 | 5.072e-3 | -1.359       | 9.016  | 5.476e-3 | 6.561e-4 | 0.638          | 8.295  | 9.328e-3 | 3.223e-2 |                         |     |       |       |    |    |    |   |   |   |   |  |
|               | AAL95158.1  Hypothetical cytosolic protein                            |        |          |          |            |        |          |          |              |        |          |          |                |        |          |          |              |        |          |          |                |        |          |          |                         |     |       |       |    |    |    |   |   |   |   |  |
| <b>FN0964</b> |                                                                       |        |          |          |            |        |          |          |              |        |          |          | 0.098          | 5.465  |          |          | 0.321        | 5.873  | 2.515e-2 | 6.763e-3 | -0.223         | 5.970  |          |          |                         |     |       |       |    |    |    |   |   |   |   |  |
|               | AAL95160.1  Precorrin-8W decarboxylase                                |        |          |          |            |        |          |          |              |        |          |          |                |        |          |          |              |        |          |          |                |        |          |          |                         |     |       |       |    |    |    |   |   |   |   |  |
| <b>FN0965</b> | 0.981                                                                 | 10.948 | 4.022e-3 | 3.349e-3 | 0.869      | 11.020 | 6.598e-3 | 2.859e-2 | 0.503        | 10.266 | 2.95e-2  | 1.408e-1 | -0.478         | 11.451 | 4.843e-2 | 7.579e-2 | -0.112       | 12.001 | 3.106e-1 | 5.882e-1 | -0.366         | 11.523 | 5.008e-2 | 2.233e-1 |                         |     |       |       |    |    |    |   |   |   |   |  |
|               | AAL95161.1  D-3-phosphoglycerate dehydrogenase                        |        |          |          |            |        |          |          |              |        |          |          |                |        |          |          |              |        |          |          |                |        |          |          |                         |     |       |       |    |    |    |   |   |   |   |  |
| <b>FN0966</b> |                                                                       |        |          |          |            |        |          |          |              |        |          |          |                |        |          |          | 0.645        | 3.999  |          |          |                |        |          |          |                         |     |       |       |    |    |    |   |   |   |   |  |
|               | AAL95162.1  Precorrin-6Y C5,15-methyltransferase (decarboxylating)    |        |          |          |            |        |          |          |              |        |          |          |                |        |          |          |              |        |          |          |                |        |          |          |                         |     |       |       |    |    |    |   |   |   |   |  |
| <b>FN0967</b> |                                                                       |        |          |          |            |        |          |          |              |        |          |          | -1.575         | 4.949  |          |          | -0.769       | 5.939  |          |          | -0.806         | 4.364  |          |          |                         |     |       |       |    |    |    |   |   |   |   |  |
|               | AAL95163.1  CbiD protein                                              |        |          |          |            |        |          |          |              |        |          |          |                |        |          |          |              |        |          |          |                |        |          |          |                         |     |       |       |    |    |    |   |   |   |   |  |
| <b>FN0970</b> | -0.918                                                                | 8.166  |          |          | -1.208     | 8.061  | 2.347e-3 | 8.283e-3 | -0.337       | 8.543  | 4.225e-3 | 1.49e-2  | 0.581          | 7.829  |          |          | -0.290       | 7.143  |          |          | 0.871          | 7.724  | 8.098e-3 | 2.731e-2 |                         |     |       |       |    |    |    |   |   |   |   |  |
|               | AAL95166.1  Precorrin-8X methylmutase                                 |        |          |          |            |        |          |          |              |        |          |          |                |        |          |          |              |        |          |          |                |        |          |          |                         |     |       |       |    |    |    |   |   |   |   |  |
| <b>FN0971</b> |                                                                       |        |          |          |            |        |          |          |              |        |          |          |                |        |          |          |              |        |          |          |                |        |          |          |                         |     |       |       |    |    |    |   |   |   |   |  |
|               | AAL95167.1  hypothetical cytosolic protein                            |        |          |          |            |        |          |          |              |        |          |          |                |        |          |          |              |        |          |          |                |        |          |          |                         |     |       |       |    |    |    |   |   |   |   |  |
| <b>FN0972</b> |                                                                       |        |          |          |            |        |          |          |              |        |          |          |                |        |          |          | 0.608        | 8.205  | 2.417e-1 | 4.149e-1 |                |        |          |          |                         |     |       |       |    |    |    |   |   |   |   |  |
|               | AAL95168.1  Cobyrinic acid a,c-diamide synthase                       |        |          |          |            |        |          |          |              |        |          |          |                |        |          |          |              |        |          |          |                |        |          |          |                         |     |       |       |    |    |    |   |   |   |   |  |
| <b>FN0974</b> |                                                                       |        |          |          |            |        |          |          |              |        |          |          |                |        |          |          |              |        |          |          |                |        |          |          |                         |     |       |       |    |    |    |   |   |   |   |  |
|               | AAL95170.1  Lactoylglutathione lyase                                  |        |          |          |            |        |          |          |              |        |          |          |                |        |          |          |              |        |          |          |                |        |          |          |                         |     |       |       |    |    |    |   |   |   |   |  |
| <b>FN0976</b> | 0.212                                                                 | 10.842 | 8.715e-3 | 9.619e-3 | 0.356      | 11.171 | 3.725e-2 | 2.029e-1 | 0.098        | 10.525 | 2.476e-2 | 1.149e-1 | -0.113         | 10.941 | 1.466e-2 | 1.36e-2  | 0.144        | 11.383 | 2.891e-1 | 5.31e-1  | -0.258         | 11.269 | 6.759e-2 | 3.121e-1 |                         |     |       |       |    |    |    |   |   |   |   |  |
|               | AAL95172.1  Hypothetical protein                                      |        |          |          |            |        |          |          |              |        |          |          |                |        |          |          |              |        |          |          |                |        |          |          |                         |     |       |       |    |    |    |   |   |   |   |  |
| <b>FN0977</b> | 0.466                                                                 | 7.027  |          |          | 1.904      | 8.650  |          |          | 0.906        | 7.263  |          |          | 0.440          | 7.934  | 1.22e-1  | 2.977e-1 | 1.438        | 9.116  | 2.056e-2 | 4.855e-3 | -0.998         | 9.556  | 4.871e-3 | 1.453e-2 |                         |     |       |       |    |    |    |   |   |   |   |  |
|               | AAL95173.1  Cobyrinic acid synthase                                   |        |          |          |            |        |          |          |              |        |          |          |                |        |          |          |              |        |          |          |                |        |          |          |                         |     |       |       |    |    |    |   |   |   |   |  |
| <b>FN0981</b> | -0.541                                                                | 13.269 | 9.925e-2 | 2.25e-1  | -1.046     | 12.949 | 1.416e-3 | 4.534e-3 | 0.225        | 13.832 | 1.476e-2 | 6.401e-2 | 0.767          | 13.495 | 5.68e-2  | 9.683e-2 | -0.504       | 12.408 | 2.381e-1 | 4.061e-1 | 1.271          | 13.175 | 2.399e-4 | 2.832e-4 |                         |     |       |       |    |    |    |   |   |   |   |  |
|               | AAL95177.1  Phosphoribosylamine--glycine ligase                       |        |          |          |            |        |          |          |              |        |          |          |                |        |          |          |              |        |          |          |                |        |          |          |                         |     |       |       |    |    |    |   |   |   |   |  |
| <b>FN0982</b> | -0.982                                                                | 15.812 | 3.046e-3 | 2.291e-3 | -0.717     | 16.261 | 7.407e-5 | 1.079e-4 | -0.629       | 15.961 | 6.087e-4 | 1.282e-3 | 0.353          | 15.183 | 5.256e-2 | 8.594e-2 | 0.265        | 15.280 | 1.408e-1 | 1.651e-1 | 0.088          | 15.633 | 8.976e-2 | 4.266e-1 |                         |     |       |       |    |    |    |   |   |   |   |  |
|               | AAL95178.1  Phosphoribosylaminoimidazolecarboxamide formyltransferase |        |          |          |            |        |          |          |              |        |          |          |                |        |          |          |              |        |          |          |                |        |          |          |                         |     |       |       |    |    |    |   |   |   |   |  |

Show detected proteins only  
 Show all proteins  
 Filter by category:

Proteins found: 1424

Enter (or paste) list of ORFs

Find ORFs

Test Cutoff

q-Value p-Value

.005

Dot Plots

| Signif | Direction | Applies To   |
|--------|-----------|--------------|
| yes    | +         | ratios, bars |
| no     | n/a       | bars         |
| yes    | -         | ratios, bars |
| yes    | +         | p-, q-Values |
| yes    | -         | p-, q-Values |

FnPg vs Fn — █ — FnSg vs Fn  
 FnPgSg vs Fn — █ — FnPgSg vs FnPg  
 FnSg vs FnPg — █ — FnPgSg vs FnSg

Fn Summary Table

FnPg vs Fn

FnSg vs Fn

FnPgSg vs Fn

FnPgSg vs FnPg

FnSg vs FnPg

FnPgSg vs FnSg

Fn Coverage

| ORF                                                                                        | FnPg vs Fn |        |          |          | FnSg vs Fn |        |          |          | FnPgSg vs Fn |        |          |          | FnPgSg vs FnPg |        |          |          | FnSg vs FnPg |        |          |          | FnPgSg vs FnSg |        |          |          | Log <sub>2</sub> Ratios |     |       |       |    |    |    |   |   |   |   |  |
|--------------------------------------------------------------------------------------------|------------|--------|----------|----------|------------|--------|----------|----------|--------------|--------|----------|----------|----------------|--------|----------|----------|--------------|--------|----------|----------|----------------|--------|----------|----------|-------------------------|-----|-------|-------|----|----|----|---|---|---|---|--|
|                                                                                            | Ratio      | Sum    | q-Val    | p-Val    | Ratio      | Sum    | q-Val    | p-Val    | Ratio        | Sum    | q-Val    | p-Val    | Ratio          | Sum    | q-Val    | p-Val    | Ratio        | Sum    | q-Val    | p-Val    | Ratio          | Sum    | q-Val    | p-Val    | Ratio                   | Sum | q-Val | p-Val | -6 | -4 | -2 | 0 | 2 | 4 | 6 |  |
| <b>FN0983</b><br>AAL95179.1   Hypothetical protein                                         | -0.487     | 14.330 | 1.85e-2  | 2.448e-2 | -0.131     | 14.870 | 3.37e-2  | 1.821e-1 | -0.751       | 13.862 | 3.496e-5 | 2.26e-5  | -0.264         | 13.579 | 9.395e-2 | 1.985e-1 | 0.355        | 14.383 | 8.978e-2 | 6.911e-2 | -0.620         | 14.119 | 1.557e-3 | 3.386e-3 |                         |     |       |       |    |    |    |   |   |   |   |  |
| <b>FN0984</b><br>AAL95180.1   Tetracenomycin polyketide synthesis O-methyltransferase tcmP | 0.262      | 9.711  | 6.168e-2 | 1.208e-1 | 1.135      | 10.768 | 2.169e-6 | 5.104e-7 | -1.455       | 7.790  | 2.059e-4 | 3.036e-4 | -1.717         | 8.256  | 5.642e-3 | 3.003e-3 | 0.873        | 11.030 | 5.226e-3 | 6.098e-4 | -2.590         | 9.313  | 3.545e-5 | 2.077e-5 |                         |     |       |       |    |    |    |   |   |   |   |  |
| <b>FN0985</b><br>AAL95181.1   Phosphoribosylglycinamide formyltransferase                  | -0.225     | 6.225  |          |          | 0.877      | 7.512  | 3.077e-3 | 1.159e-2 | 0.822        | 7.069  | 5.329e-3 | 1.973e-2 | 1.047          | 7.047  |          |          | 1.102        | 7.287  |          |          | -0.055         | 8.334  | 1.523e-1 | 7.774e-1 |                         |     |       |       |    |    |    |   |   |   |   |  |
| <b>FN0986</b><br>AAL95182.1   Phosphoribosylformylglycinamide cyclo-ligase                 | 0.244      | 14.606 | 2.176e-1 | 6.201e-1 | 0.475      | 15.021 | 3.343e-2 | 1.805e-1 | 0.300        | 14.458 | 9.588e-3 | 3.932e-2 | 0.056          | 14.906 | 2.727e-1 | 8.988e-1 | 0.231        | 15.265 | 3.259e-1 | 6.311e-1 | -0.175         | 15.321 | 1.11e-1  | 5.399e-1 |                         |     |       |       |    |    |    |   |   |   |   |  |
| <b>FN0987</b><br>AAL95183.1   Amidophosphoribosyltransferase                               | -0.757     | 13.564 | 8.981e-2 | 1.976e-1 | 0.022      | 14.528 | 1.348e-1 | 8.278e-1 | -0.848       | 13.270 | 1.14e-3  | 2.853e-3 | -0.090         | 12.716 | 2.716e-1 | 8.939e-1 | 0.779        | 13.771 | 1.482e-1 | 1.851e-1 | -0.870         | 13.680 | 1.512e-4 | 1.5e-4   |                         |     |       |       |    |    |    |   |   |   |   |  |
| <b>FN0988</b><br>AAL95184.1   Phosphoribosylamidoimidazole-succinocarboxamide synthase     | -0.446     | 16.009 | 5.721e-2 | 1.081e-1 | -0.386     | 16.254 | 1.078e-2 | 5.092e-2 | 0.276        | 16.528 | 9.733e-4 | 2.308e-3 | 0.723          | 16.285 | 2.183e-2 | 2.406e-2 | 0.060        | 15.807 | 3.888e-1 | 8.305e-1 | 0.662          | 16.530 | 2.478e-3 | 6.075e-3 |                         |     |       |       |    |    |    |   |   |   |   |  |
| <b>FN0989</b><br>AAL95185.1   Phosphoribosylaminoimidazole carboxylase catalytic subunit   | 0.155      | 14.899 | 8.33e-2  | 1.794e-1 | 0.205      | 15.133 | 7.669e-2 | 4.414e-1 | 0.366        | 14.907 | 2.992e-3 | 9.854e-3 | 0.212          | 15.265 | 5.29e-2  | 8.682e-2 | 0.050        | 15.288 | 3.92e-1  | 8.416e-1 | 0.162          | 15.499 | 1.027e-1 | 4.95e-1  |                         |     |       |       |    |    |    |   |   |   |   |  |
| <b>FN0990</b><br>AAL95186.1   Phosphoribosylformylglycinamide synthase                     | -0.490     | 20.379 | 9.099e-2 | 2.009e-1 | 0.344      | 21.397 | 1.098e-5 | 6.798e-6 | -0.210       | 20.455 | 1.551e-3 | 4.408e-3 | 0.279          | 20.169 | 1.644e-1 | 4.532e-1 | 0.834        | 20.908 | 7.738e-2 | 5.039e-2 | -0.554         | 21.187 | 4.339e-5 | 2.86e-5  |                         |     |       |       |    |    |    |   |   |   |   |  |
| <b>FN0991</b><br>AAL95187.1   CDP-diacylglycerol--serine O-phosphatidyltransferase         | 0.655      | 8.967  | 1.629e-2 | 2.067e-2 | 0.565      | 9.062  | 8.382e-3 | 3.79e-2  | 0.894        | 9.003  | 2.917e-3 | 9.545e-3 | 0.239          | 9.861  | 2.17e-2  | 2.385e-2 | -0.090       | 9.717  | 2.554e-1 | 4.478e-1 | 0.329          | 9.956  | 8.242e-3 | 2.788e-2 |                         |     |       |       |    |    |    |   |   |   |   |  |
| <b>FN0992</b><br>AAL95188.1   ADP-heptose:LPS heptosyltransferase II                       | -1.170     | 9.310  | 1.187e-2 | 1.391e-2 | -0.278     | 10.387 | 6.06e-3  | 2.585e-2 | -0.556       | 9.721  | 1.545e-3 | 4.381e-3 | 0.614          | 8.754  | 6.609e-2 | 1.194e-1 | 0.892        | 9.216  | 6.184e-2 | 3.307e-2 | -0.278         | 9.830  | 1.901e-2 | 7.43e-2  |                         |     |       |       |    |    |    |   |   |   |   |  |
| <b>FN0994</b><br>AAL95190.1   Hypothetical protein                                         | -0.521     | 13.603 | 1.042e-1 | 2.392e-1 | -0.481     | 13.827 | 1.253e-2 | 6.059e-2 | 0.167        | 14.088 | 6.077e-4 | 1.279e-3 | 0.689          | 13.770 | 7.093e-2 | 1.315e-1 | 0.040        | 13.306 | 4.174e-1 | 9.355e-1 | 0.649          | 13.995 | 7.483e-3 | 2.481e-2 |                         |     |       |       |    |    |    |   |   |   |   |  |
| <b>FN0997</b><br>AAL95193.1   Hypothetical protein                                         | 0.196      | 10.477 | 2.442e-1 | 7.205e-1 | 0.845      | 11.311 | 3.85e-3  | 1.54e-2  | -0.204       | 9.873  | 5.1e-2   | 2.645e-1 | -0.400         | 10.273 | 1.803e-1 | 5.145e-1 | 0.649        | 11.507 | 1.465e-1 | 1.803e-1 | -1.049         | 11.106 | 2.015e-3 | 4.662e-3 |                         |     |       |       |    |    |    |   |   |   |   |  |
| <b>FN0998</b><br>AAL95194.1   Dipeptide-binding protein                                    | -0.464     | 14.207 | 8.798e-2 | 1.924e-1 | 0.938      | 15.794 | 2.681e-5 | 2.464e-5 | -0.900       | 13.567 | 7.919e-4 | 1.777e-3 | -0.437         | 13.307 | 1.323e-1 | 3.367e-1 | 1.402        | 15.330 | 2.05e-2  | 4.831e-3 | -1.839         | 14.893 | 1.011e-5 | 2.998e-6 |                         |     |       |       |    |    |    |   |   |   |   |  |
| <b>FN0999</b><br>AAL95195.1   Deblocking aminopeptidase                                    | 1.169      | 10.601 | 1.08e-1  | 2.5e-1   | 0.532      | 10.149 | 6.355e-3 | 2.734e-2 | -1.794       | 7.434  | 1.731e-3 | 5.06e-3  | -2.963         | 8.807  | 6.27e-2  | 1.112e-1 | -0.636       | 11.318 | 2.471e-1 | 4.279e-1 | -2.326         | 8.355  | 1.002e-5 | 2.944e-6 |                         |     |       |       |    |    |    |   |   |   |   |  |
| <b>FN1000</b><br>AAL95196.1   Biotin synthase                                              | -1.723     | 10.632 |          |          |            |        |          |          | -0.673       | 11.477 | 3.788e-4 | 6.974e-4 | 1.050          | 9.958  |          |          |              |        |          |          |                |        |          |          |                         |     |       |       |    |    |    |   |   |   |   |  |
| <b>FN1001</b><br>AAL95197.1   Dethiobiotin synthetase                                      | 0.363      | 10.024 | 1.78e-1  | 4.78e-1  | 0.526      | 10.371 | 7.727e-4 | 2.185e-3 | -0.383       | 9.074  | 1.276e-2 | 5.425e-2 | -0.746         | 9.641  | 1.053e-1 | 2.39e-1  | 0.163        | 10.734 | 3.475e-1 | 6.953e-1 | -0.909         | 9.988  | 4.845e-4 | 7.161e-4 |                         |     |       |       |    |    |    |   |   |   |   |  |
| <b>FN1002</b><br>AAL95198.1   Adenosylmethionine-8-amino-7-oxononanoate aminotransferase   | 0.038      | 12.127 | 2.916e-1 | 9.176e-1 | -1.433     | 10.841 | 7.26e-5  | 1.046e-4 | -0.790       | 11.096 | 8.906e-4 | 2.059e-3 | -0.828         | 11.337 | 7.835e-2 | 1.513e-1 | -1.471       | 10.879 | 8.808e-2 | 6.632e-2 | 0.643          | 10.051 | 1.64e-3  | 3.618e-3 |                         |     |       |       |    |    |    |   |   |   |   |  |

Show detected proteins only  
 Show all proteins  
 Filter by category:

Proteins found: 1424

Enter (or paste) list of ORFs

Find ORFs

Test Cutoff

q-Value .005

p-Value

Dot Plots

| Signif | Direction | Applies To   |
|--------|-----------|--------------|
| yes    | +         | ratios, bars |
| no     | n/a       | bars         |
| yes    | -         | ratios, bars |
| yes    | +         | p-, q-Values |
| yes    | -         | p-, q-Values |



Fn Summary Table FnPg vs Fn FnSg vs Fn FnPgSg vs Fn FnPgSg vs FnPg FnSg vs FnPg FnPgSg vs FnSg Fn Coverage

| ORF           | FnPg vs Fn                                                 |        |          |          | FnSg vs Fn    |        |          |          | FnPgSg vs Fn  |        |          |          | FnPgSg vs FnPg |        |          |          | FnSg vs FnPg |        |          |          | FnPgSg vs FnSg |        |          |          | Log <sub>2</sub> Ratios |     |       |       |    |    |    |   |   |   |   |  |
|---------------|------------------------------------------------------------|--------|----------|----------|---------------|--------|----------|----------|---------------|--------|----------|----------|----------------|--------|----------|----------|--------------|--------|----------|----------|----------------|--------|----------|----------|-------------------------|-----|-------|-------|----|----|----|---|---|---|---|--|
|               | Ratio                                                      | Sum    | q-Val    | p-Val    | Ratio         | Sum    | q-Val    | p-Val    | Ratio         | Sum    | q-Val    | p-Val    | Ratio          | Sum    | q-Val    | p-Val    | Ratio        | Sum    | q-Val    | p-Val    | Ratio          | Sum    | q-Val    | p-Val    | Ratio                   | Sum | q-Val | p-Val | -6 | -4 | -2 | 0 | 2 | 4 | 6 |  |
| <b>FN1003</b> | 2.452                                                      | 12.779 | 1.031e-1 | 2.361e-1 | <b>1.665</b>  | 12.176 | 3.113e-4 | 6.751e-4 | 0.334         | 10.456 | 1.132e-2 | 4.74e-2  | -2.119         | 13.112 | 1.106e-1 | 2.583e-1 | -0.787       | 14.629 | 2.781e-1 | 5.028e-1 | <b>-1.332</b>  | 12.510 | 3.394e-4 | 4.533e-4 |                         |     |       |       |    |    |    |   |   |   |   |  |
|               | AAL95199.1  Outer membrane protein P1 precursor            |        |          |          |               |        |          |          |               |        |          |          |                |        |          |          |              |        |          |          |                |        |          |          |                         |     |       |       |    |    |    |   |   |   |   |  |
| <b>FN1004</b> | -0.043                                                     | 8.170  | 2.818e-1 | 8.748e-1 | 0.192         | 8.589  | 1.141e-1 | 6.845e-1 | -0.465        | 7.544  | 4.058e-2 | 2.047e-1 | -0.423         | 7.705  | 1.482e-2 | 1.385e-2 | 0.234        | 8.546  | 3.101e-1 | 5.867e-1 | -0.657         | 8.123  | 5.251e-2 | 2.356e-1 |                         |     |       |       |    |    |    |   |   |   |   |  |
|               | AAL95200.1  Transcriptional regulator, TetR family         |        |          |          |               |        |          |          |               |        |          |          |                |        |          |          |              |        |          |          |                |        |          |          |                         |     |       |       |    |    |    |   |   |   |   |  |
| <b>FN1005</b> | -1.383                                                     | 11.558 |          |          | <b>-0.969</b> | 12.157 | 4.793e-4 | 1.161e-3 | <b>-1.648</b> | 11.090 | 2.823e-5 | 1.529e-5 | -0.264         | 9.910  |          |          | 0.414        | 10.773 |          |          | -0.678         | 10.509 | 1.288e-2 | 4.73e-2  |                         |     |       |       |    |    |    |   |   |   |   |  |
|               | AAL95201.1  Hypothetical protein                           |        |          |          |               |        |          |          |               |        |          |          |                |        |          |          |              |        |          |          |                |        |          |          |                         |     |       |       |    |    |    |   |   |   |   |  |
| <b>FN1006</b> |                                                            |        |          |          |               |        |          |          |               |        |          |          |                |        |          |          | -0.900       | 8.070  |          |          |                |        |          |          |                         |     |       |       |    |    |    |   |   |   |   |  |
|               | AAL95202.1  Acetyltransferase                              |        |          |          |               |        |          |          |               |        |          |          |                |        |          |          |              |        |          |          |                |        |          |          |                         |     |       |       |    |    |    |   |   |   |   |  |
| <b>FN1008</b> |                                                            |        |          |          |               |        |          |          |               |        |          |          |                |        |          |          |              |        |          |          |                |        |          |          |                         |     |       |       |    |    |    |   |   |   |   |  |
|               | AAL95204.1  Hypothetical protein                           |        |          |          |               |        |          |          |               |        |          |          |                |        |          |          |              |        |          |          |                |        |          |          |                         |     |       |       |    |    |    |   |   |   |   |  |
| <b>FN1009</b> |                                                            |        |          |          |               |        |          |          |               |        |          |          |                |        |          |          |              |        |          |          |                |        |          |          |                         |     |       |       |    |    |    |   |   |   |   |  |
|               | AAL95205.1  Hypothetical protein                           |        |          |          |               |        |          |          |               |        |          |          |                |        |          |          |              |        |          |          |                |        |          |          |                         |     |       |       |    |    |    |   |   |   |   |  |
| <b>FN1010</b> | 0.010                                                      | 14.731 | 3.047e-1 | 9.77e-1  | <b>-0.758</b> | 14.147 | 2.453e-4 | 4.93e-4  | 0.075         | 14.592 | 3.787e-2 | 1.888e-1 | 0.065          | 14.806 | 2.626e-1 | 8.539e-1 | -0.769       | 14.158 | 1.418e-1 | 1.676e-1 | <b>0.833</b>   | 14.222 | 6.179e-4 | 1.013e-3 |                         |     |       |       |    |    |    |   |   |   |   |  |
|               | AAL95206.1  Hypothetical cytosolic protein                 |        |          |          |               |        |          |          |               |        |          |          |                |        |          |          |              |        |          |          |                |        |          |          |                         |     |       |       |    |    |    |   |   |   |   |  |
| <b>FN1011</b> | -0.119                                                     | 7.081  | 2.358e-1 | 6.877e-1 | -0.124        | 7.260  | 1.113e-1 | 6.653e-1 | -1.140        | 5.855  |          |          | -1.022         | 5.940  |          |          | -0.006       | 7.141  | 4.221e-1 | 9.536e-1 | -1.016         | 6.119  |          |          |                         |     |       |       |    |    |    |   |   |   |   |  |
|               | AAL95207.1  MGPA protein                                   |        |          |          |               |        |          |          |               |        |          |          |                |        |          |          |              |        |          |          |                |        |          |          |                         |     |       |       |    |    |    |   |   |   |   |  |
| <b>FN1012</b> | 0.540                                                      | 9.286  | 1.597e-2 | 2.014e-2 | <b>0.830</b>  | 9.761  | 3.931e-3 | 1.577e-2 | <b>-0.881</b> | 7.661  | 8.138e-4 | 1.838e-3 | <b>-1.421</b>  | 8.405  | 4.169e-3 | 1.973e-3 | 0.290        | 10.301 | 1.471e-1 | 1.82e-1  | <b>-1.711</b>  | 8.880  | 1.899e-3 | 4.333e-3 |                         |     |       |       |    |    |    |   |   |   |   |  |
|               | AAL95208.1  HPR(Ser) kinase                                |        |          |          |               |        |          |          |               |        |          |          |                |        |          |          |              |        |          |          |                |        |          |          |                         |     |       |       |    |    |    |   |   |   |   |  |
| <b>FN1014</b> | -0.074                                                     | 8.992  |          |          | 0.418         | 9.669  | 4.723e-2 | 2.622e-1 | <b>-1.798</b> | 7.064  | 2.864e-3 | 9.327e-3 | -1.725         | 7.194  |          |          | 0.492        | 9.595  |          |          | -2.216         | 7.871  | 6.417e-3 | 2.054e-2 |                         |     |       |       |    |    |    |   |   |   |   |  |
|               | AAL95210.1  Folypolyglutamate synthase                     |        |          |          |               |        |          |          |               |        |          |          |                |        |          |          |              |        |          |          |                |        |          |          |                         |     |       |       |    |    |    |   |   |   |   |  |
| <b>FN1015</b> | 0.151                                                      | 9.565  |          |          | -1.189        | 8.409  | 6.532e-3 | 2.825e-2 | -0.513        | 8.696  | 2.865e-2 | 1.361e-1 | -0.665         | 9.051  |          |          | -1.341       | 8.560  |          |          | 0.676          | 7.895  | 7.405e-3 | 2.448e-2 |                         |     |       |       |    |    |    |   |   |   |   |  |
|               | AAL95211.1  5'-methylthioadenosine nucleosidase            |        |          |          |               |        |          |          |               |        |          |          |                |        |          |          |              |        |          |          |                |        |          |          |                         |     |       |       |    |    |    |   |   |   |   |  |
| <b>FN1016</b> | -0.913                                                     | 8.474  | 4.779e-2 | 8.424e-2 | 0.269         | 9.840  | 1.155e-2 | 5.513e-2 | <b>-1.958</b> | 7.224  | 1.7e-7   | 8.462e-9 | -1.045         | 6.515  | 1.04e-1  | 2.341e-1 | 1.182        | 8.927  | 5.703e-2 | 2.886e-2 | <b>-2.227</b>  | 7.881  | 4.995e-4 | 7.466e-4 |                         |     |       |       |    |    |    |   |   |   |   |  |
|               | AAL95212.1  Lipid A biosynthesis lauroyl acyltransferase   |        |          |          |               |        |          |          |               |        |          |          |                |        |          |          |              |        |          |          |                |        |          |          |                         |     |       |       |    |    |    |   |   |   |   |  |
| <b>FN1017</b> | -0.810                                                     | 13.336 | 2.757e-2 | 4.055e-2 | <b>-0.888</b> | 13.443 | 3.443e-4 | 7.683e-4 | <b>-0.389</b> | 13.554 | 1.469e-3 | 4.093e-3 | 0.421          | 12.947 | 1.035e-1 | 2.322e-1 | -0.078       | 12.632 | 3.919e-1 | 8.413e-1 | 0.499          | 13.054 | 7.066e-3 | 2.31e-2  |                         |     |       |       |    |    |    |   |   |   |   |  |
|               | AAL95213.1  Hypothetical Exported Protein                  |        |          |          |               |        |          |          |               |        |          |          |                |        |          |          |              |        |          |          |                |        |          |          |                         |     |       |       |    |    |    |   |   |   |   |  |
| <b>FN1019</b> | <b>1.988</b>                                               | 22.716 | 7.01e-4  | 2.607e-4 | <b>1.342</b>  | 22.254 | 4.353e-5 | 4.996e-5 | <b>1.629</b>  | 22.153 | 4.008e-4 | 7.532e-4 | -0.359         | 24.345 | 8.252e-3 | 5.639e-3 | -0.646       | 24.242 | 7.914e-3 | 1.238e-3 | 0.287          | 23.883 | 8.102e-3 | 2.732e-2 |                         |     |       |       |    |    |    |   |   |   |   |  |
|               | AAL95215.1  3-hydroxybutyryl-CoA dehydrogenase             |        |          |          |               |        |          |          |               |        |          |          |                |        |          |          |              |        |          |          |                |        |          |          |                         |     |       |       |    |    |    |   |   |   |   |  |
| <b>FN1020</b> | <b>1.393</b>                                               | 17.148 | 8.937e-5 | 1.135e-5 | 1.016         | 16.956 | 7.01e-3  | 3.075e-2 | <b>0.845</b>  | 16.396 | 4.69e-3  | 1.689e-2 | -0.548         | 17.993 | 1.455e-2 | 1.343e-2 | -0.377       | 18.349 | 1.128e-1 | 1.064e-1 | -0.171         | 17.801 | 1.036e-1 | 5.001e-1 |                         |     |       |       |    |    |    |   |   |   |   |  |
|               | AAL95216.1  3-hydroxybutyryl-CoA dehydratase               |        |          |          |               |        |          |          |               |        |          |          |                |        |          |          |              |        |          |          |                |        |          |          |                         |     |       |       |    |    |    |   |   |   |   |  |
| <b>FN1022</b> |                                                            |        |          |          |               |        |          |          | -1.792        | 9.007  | 6.154e-3 | 2.337e-2 |                |        |          |          |              |        |          |          |                |        |          |          |                         |     |       |       |    |    |    |   |   |   |   |  |
|               | AAL95218.1  Calcium-transporting ATPase                    |        |          |          |               |        |          |          |               |        |          |          |                |        |          |          |              |        |          |          |                |        |          |          |                         |     |       |       |    |    |    |   |   |   |   |  |
| <b>FN1023</b> |                                                            |        |          |          |               |        |          |          |               |        |          |          | -1.178         | 6.997  |          |          | 0.351        | 8.711  |          |          | -1.530         | 7.533  |          |          |                         |     |       |       |    |    |    |   |   |   |   |  |
|               | AAL95219.1  5-Nitroimidazole antibiotic resistance protein |        |          |          |               |        |          |          |               |        |          |          |                |        |          |          |              |        |          |          |                |        |          |          |                         |     |       |       |    |    |    |   |   |   |   |  |

Show detected proteins only  
 Show all proteins  
 Filter by category:

Proteins found: 1424

**Test** **Cutoff**

| Signif | Direction | Applies To   |
|--------|-----------|--------------|
| yes    | +         | ratios, bars |
| no     | n/a       | bars         |
| yes    | -         | ratios, bars |
| yes    | +         | p-, q-Values |
| yes    | -         | p-, q-Values |

*FnPg vs Fn* — ■ — *FnSg vs Fn*  
*FnPgSg vs Fn* — ■ — *FnPgSg vs FnPg*  
*FnSg vs FnPg* — ■ — *FnPgSg vs FnSg*  
■ — *FnPgSg vs FnSg*



Fn Summary Table   FnPg vs Fn   FnSg vs Fn   FnPgSg vs Fn   FnPgSg vs FnPg   FnSg vs FnPg   FnPgSg vs FnSg   Fn Coverage

| ORF           | FnPg vs Fn                                                   |        |          |          | FnSg vs Fn |        |          |          | FnPgSg vs Fn |        |          |          | FnPgSg vs FnPg |        |          |          | FnSg vs FnPg |        |          |          | FnPgSg vs FnSg |        |          |          | Log <sub>2</sub> Ratios |     |       |       |    |    |    |   |   |   |   |  |
|---------------|--------------------------------------------------------------|--------|----------|----------|------------|--------|----------|----------|--------------|--------|----------|----------|----------------|--------|----------|----------|--------------|--------|----------|----------|----------------|--------|----------|----------|-------------------------|-----|-------|-------|----|----|----|---|---|---|---|--|
|               | Ratio                                                        | Sum    | q-Val    | p-Val    | Ratio      | Sum    | q-Val    | p-Val    | Ratio        | Sum    | q-Val    | p-Val    | Ratio          | Sum    | q-Val    | p-Val    | Ratio        | Sum    | q-Val    | p-Val    | Ratio          | Sum    | q-Val    | p-Val    | Ratio                   | Sum | q-Val | p-Val | -6 | -4 | -2 | 0 | 2 | 4 | 6 |  |
| <b>FN1024</b> | -0.259                                                       | 20.496 | 5.749e-2 | 1.089e-1 | -0.340     | 20.600 | 1.236e-2 | 5.962e-2 | -0.164       | 20.387 | 8.373e-2 | 4.604e-1 | 0.096          | 20.332 | 2.291e-1 | 7.125e-1 | -0.080       | 20.340 | 3.402e-1 | 6.731e-1 | 0.176          | 20.436 | 1.063e-1 | 5.144e-1 |                         |     |       |       |    |    |    |   |   |   |   |  |
|               | AAL95220.1   DNA-binding protein HU                          |        |          |          |            |        |          |          |              |        |          |          |                |        |          |          |              |        |          |          |                |        |          |          |                         |     |       |       |    |    |    |   |   |   |   |  |
| <b>FN1025</b> | 0.257                                                        | 8.083  |          |          | -0.683     | 7.327  |          |          | 0.114        | 7.736  | 6.586e-2 | 3.515e-1 | -0.143         | 8.197  |          |          | -0.940       | 7.584  |          |          | 0.797          | 7.441  |          |          |                         |     |       |       |    |    |    |   |   |   |   |  |
|               | AAL95221.1   Guanine-hypoxanthine permease                   |        |          |          |            |        |          |          |              |        |          |          |                |        |          |          |              |        |          |          |                |        |          |          |                         |     |       |       |    |    |    |   |   |   |   |  |
| <b>FN1026</b> |                                                              |        |          |          | -1.144     | 6.314  |          |          |              |        |          |          |                |        |          |          |              |        |          |          |                |        |          |          |                         |     |       |       |    |    |    |   |   |   |   |  |
|               | AAL95222.1   tRNA pseudouridine synthase A                   |        |          |          |            |        |          |          |              |        |          |          |                |        |          |          |              |        |          |          |                |        |          |          |                         |     |       |       |    |    |    |   |   |   |   |  |
| <b>FN1028</b> | -0.690                                                       | 10.293 | 4.263e-2 | 7.194e-2 | -0.896     | 10.271 | 8.173e-3 | 3.679e-2 | -0.275       | 10.505 | 5.765e-2 | 3.036e-1 | 0.415          | 10.018 | 9.453e-4 | 2.2e-4   | -0.206       | 9.581  | 2.31e-1  | 3.874e-1 | 0.622          | 9.997  | 9.951e-3 | 3.482e-2 |                         |     |       |       |    |    |    |   |   |   |   |  |
|               | AAL95224.1   Deoxyridine 5'-triphosphate nucleotidohydrolase |        |          |          |            |        |          |          |              |        |          |          |                |        |          |          |              |        |          |          |                |        |          |          |                         |     |       |       |    |    |    |   |   |   |   |  |
| <b>FN1029</b> | -0.677                                                       | 13.217 | 6.642e-4 | 2.383e-4 | -1.376     | 12.703 | 1.812e-5 | 1.419e-5 | -0.888       | 12.803 | 6.058e-4 | 1.274e-3 | -0.211         | 12.329 | 9.931e-2 | 2.169e-1 | -0.699       | 12.026 | 5.539e-4 | 7.104e-6 | 0.488          | 11.815 | 1.641e-2 | 6.267e-2 |                         |     |       |       |    |    |    |   |   |   |   |  |
|               | AAL95225.1   Zinc protease                                   |        |          |          |            |        |          |          |              |        |          |          |                |        |          |          |              |        |          |          |                |        |          |          |                         |     |       |       |    |    |    |   |   |   |   |  |
| <b>FN1030</b> | 2.719                                                        | 6.451  |          |          | 2.408      | 6.323  |          |          | 1.236        | 4.764  |          |          | -1.483         | 7.687  |          |          | -0.312       | 9.043  |          |          | -1.171         | 7.560  |          |          |                         |     |       |       |    |    |    |   |   |   |   |  |
|               | AAL95226.1   Hypothetical membrane-spanning protein          |        |          |          |            |        |          |          |              |        |          |          |                |        |          |          |              |        |          |          |                |        |          |          |                         |     |       |       |    |    |    |   |   |   |   |  |
| <b>FN1031</b> | 0.330                                                        | 6.840  |          |          | 0.112      | 6.807  |          |          | -1.211       | 5.096  |          |          | -1.541         | 5.629  |          |          | -0.218       | 7.137  |          |          | -1.323         | 5.596  |          |          |                         |     |       |       |    |    |    |   |   |   |   |  |
|               | AAL95227.1   Hypothetical membrane-spanning protein          |        |          |          |            |        |          |          |              |        |          |          |                |        |          |          |              |        |          |          |                |        |          |          |                         |     |       |       |    |    |    |   |   |   |   |  |
| <b>FN1033</b> | -0.493                                                       | 12.379 | 2.38e-2  | 3.371e-2 | -0.763     | 12.293 | 2.02e-3  | 6.894e-3 | -1.756       | 10.912 | 9.872e-4 | 2.351e-3 | -1.263         | 10.623 | 3.927e-5 | 1.921e-6 | -0.270       | 11.800 | 1.251e-1 | 1.298e-1 | -0.993         | 10.538 | 4.381e-3 | 1.262e-2 |                         |     |       |       |    |    |    |   |   |   |   |  |
|               | AAL95229.1   Methyltransferase                               |        |          |          |            |        |          |          |              |        |          |          |                |        |          |          |              |        |          |          |                |        |          |          |                         |     |       |       |    |    |    |   |   |   |   |  |
| <b>FN1034</b> |                                                              |        |          |          |            |        |          |          |              |        |          |          |                |        |          |          |              |        |          |          | -1.092         | 5.480  |          |          |                         |     |       |       |    |    |    |   |   |   |   |  |
|               | AAL95230.1   Transcriptional regulator, TetR family          |        |          |          |            |        |          |          |              |        |          |          |                |        |          |          |              |        |          |          |                |        |          |          |                         |     |       |       |    |    |    |   |   |   |   |  |
| <b>FN1035</b> |                                                              |        |          |          |            |        |          |          |              |        |          |          |                |        |          |          |              |        |          |          |                |        |          |          |                         |     |       |       |    |    |    |   |   |   |   |  |
|               | AAL95231.1   Iron-sulfur flavoprotein                        |        |          |          |            |        |          |          |              |        |          |          |                |        |          |          |              |        |          |          |                |        |          |          |                         |     |       |       |    |    |    |   |   |   |   |  |
| <b>FN1036</b> |                                                              |        |          |          |            |        |          |          |              |        |          |          |                |        |          |          |              |        |          |          |                |        |          |          |                         |     |       |       |    |    |    |   |   |   |   |  |
|               | AAL95232.1   Hypothetical protein                            |        |          |          |            |        |          |          |              |        |          |          |                |        |          |          |              |        |          |          |                |        |          |          |                         |     |       |       |    |    |    |   |   |   |   |  |
| <b>FN1037</b> |                                                              |        |          |          |            |        |          |          |              |        |          |          | -2.220         | 5.594  |          |          | 0.102        | 8.100  |          |          | -2.322         | 5.880  |          |          |                         |     |       |       |    |    |    |   |   |   |   |  |
|               | AAL95233.1   Hypothetical cytosolic protein                  |        |          |          |            |        |          |          |              |        |          |          |                |        |          |          |              |        |          |          |                |        |          |          |                         |     |       |       |    |    |    |   |   |   |   |  |
| <b>FN1041</b> |                                                              |        |          |          |            |        |          |          |              |        |          |          | -0.327         | 6.701  | 1.623e-1 | 4.455e-1 | 0.452        | 7.665  | 1.624e-1 | 2.198e-1 | -0.779         | 7.337  | 4.189e-3 | 1.186e-2 |                         |     |       |       |    |    |    |   |   |   |   |  |
|               | AAL95237.1   Acetyltransferase                               |        |          |          |            |        |          |          |              |        |          |          |                |        |          |          |              |        |          |          |                |        |          |          |                         |     |       |       |    |    |    |   |   |   |   |  |
| <b>FN1042</b> | -2.915                                                       | 10.932 | 2.608e-4 | 5.805e-5 | -2.845     | 11.186 | 1.938e-5 | 1.574e-5 | -2.360       | 11.283 | 1.743e-4 | 2.372e-4 | 0.555          | 8.572  | 1.808e-2 | 1.847e-2 | 0.070        | 8.271  | 3.84e-1  | 8.14e-1  | 0.485          | 8.826  | 2.127e-2 | 8.474e-2 |                         |     |       |       |    |    |    |   |   |   |   |  |
|               | AAL95238.1   S1 RNA binding domain                           |        |          |          |            |        |          |          |              |        |          |          |                |        |          |          |              |        |          |          |                |        |          |          |                         |     |       |       |    |    |    |   |   |   |   |  |
| <b>FN1045</b> |                                                              |        |          |          |            |        |          |          |              |        |          |          |                |        |          |          |              |        |          |          |                |        |          |          |                         |     |       |       |    |    |    |   |   |   |   |  |
|               | AAL95241.1   Hypothetical protein                            |        |          |          |            |        |          |          |              |        |          |          |                |        |          |          |              |        |          |          |                |        |          |          |                         |     |       |       |    |    |    |   |   |   |   |  |
| <b>FN1048</b> |                                                              |        |          |          |            |        |          |          |              |        |          |          |                |        |          |          |              |        |          |          | -0.186         | 3.744  |          |          |                         |     |       |       |    |    |    |   |   |   |   |  |
|               | AAL95244.1   Hypothetical membrane-spanning protein          |        |          |          |            |        |          |          |              |        |          |          |                |        |          |          |              |        |          |          |                |        |          |          |                         |     |       |       |    |    |    |   |   |   |   |  |
| <b>FN1050</b> | 0.963                                                        | 7.139  |          |          |            |        |          |          |              |        |          |          |                |        |          |          |              |        |          |          |                |        |          |          |                         |     |       |       |    |    |    |   |   |   |   |  |
|               | AAL95246.1   Lactoylglutathione lyase                        |        |          |          |            |        |          |          |              |        |          |          |                |        |          |          |              |        |          |          |                |        |          |          |                         |     |       |       |    |    |    |   |   |   |   |  |

Show detected proteins only

Show all proteins

Filter by category:

GO: amino acid transport

Proteins found: 1424

Enter (or paste) list of ORFs

Find ORFs

Test

q-Value

p-Value

Cutoff

.005

Dot Plots

Dot Plots

| Signif | Direction | Applies To   |
|--------|-----------|--------------|
| yes    | +         | ratios, bars |
| no     | n/a       | bars         |
| yes    | -         | ratios, bars |
| yes    | +         | p-, q-Values |
| yes    | -         | p-, q-Values |

FnPg vs Fn

FnPgSg vs Fn

FnSg vs FnPg

FnPgSg vs FnSg

FnSg vs Fn

FnPgSg vs FnPg

FnPgSg vs FnSg

Fn Summary Table

FnPg vs Fn

FnSg vs Fn

FnPgSg vs FnPg

FnPgSg vs FnPg

FnSg vs FnPg

FnPgSg vs FnSg

Fn Coverage

| ORF           | FnPg vs Fn                                             |        |          |          | FnSg vs Fn |        |          |          | FnPgSg vs FnPg |        |          |          | FnPgSg vs FnPg |        |          |          | FnSg vs FnPg |        |          |          | FnPgSg vs FnSg |        |          |          | Log <sub>2</sub> Ratios |     |       |       |    |    |    |   |   |   |
|---------------|--------------------------------------------------------|--------|----------|----------|------------|--------|----------|----------|----------------|--------|----------|----------|----------------|--------|----------|----------|--------------|--------|----------|----------|----------------|--------|----------|----------|-------------------------|-----|-------|-------|----|----|----|---|---|---|
|               | Ratio                                                  | Sum    | q-Val    | p-Val    | Ratio      | Sum    | q-Val    | p-Val    | Ratio          | Sum    | q-Val    | p-Val    | Ratio          | Sum    | q-Val    | p-Val    | Ratio        | Sum    | q-Val    | p-Val    | Ratio          | Sum    | q-Val    | p-Val    | Ratio                   | Sum | q-Val | p-Val | -6 | -4 | -2 | 0 | 2 | 4 |
| <b>FN1053</b> | AAL95249.1   Hypothetical protein                      |        |          |          |            |        |          |          |                |        |          |          |                |        |          |          |              |        |          |          |                |        |          |          |                         |     |       |       |    |    |    |   |   |   |
| <b>FN1055</b> | 0.210                                                  | 11.779 | 1.959e-1 | 5.433e-1 | 0.291      | 12.045 | 8.966e-3 | 4.105e-2 | -0.421         | 10.944 | 7.886e-3 | 3.12e-2  | -0.631         | 11.357 | 8.252e-2 | 1.631e-1 | 0.082        | 12.254 | 3.757e-1 | 7.855e-1 | -0.712         | 11.624 | 6.778e-4 | 1.149e-3 |                         |     |       |       |    |    |    |   |   |   |
|               | AAL95251.1   Cysteine synthase                         |        |          |          |            |        |          |          |                |        |          |          |                |        |          |          |              |        |          |          |                |        |          |          |                         |     |       |       |    |    |    |   |   |   |
| <b>FN1057</b> |                                                        |        |          |          | 0.533      | 6.990  | 7.972e-2 | 4.603e-1 |                |        |          |          |                |        |          |          |              |        |          |          |                |        |          |          |                         |     |       |       |    |    |    |   |   |   |
|               | AAL95253.1   Diamine acetyltransferase                 |        |          |          |            |        |          |          |                |        |          |          |                |        |          |          |              |        |          |          |                |        |          |          |                         |     |       |       |    |    |    |   |   |   |
| <b>FN1060</b> | 0.259                                                  | 9.702  | 2.678e-2 | 3.909e-2 | 0.612      | 10.239 | 1.057e-3 | 3.183e-3 | -0.041         | 9.198  | 1.263e-1 | 7.317e-1 | -0.300         | 9.661  | 1.346e-2 | 1.186e-2 | 0.353        | 10.498 | 1.031e-2 | 1.79e-3  | -0.653         | 10.198 | 8.286e-4 | 1.513e-3 |                         |     |       |       |    |    |    |   |   |   |
|               | AAL95256.1   hypothetical cytosolic protein            |        |          |          |            |        |          |          |                |        |          |          |                |        |          |          |              |        |          |          |                |        |          |          |                         |     |       |       |    |    |    |   |   |   |
| <b>FN1062</b> | -0.585                                                 | 12.657 | 2.795e-2 | 4.127e-2 | -1.435     | 11.992 | 5.281e-4 | 1.32e-3  | 0.379          | 13.417 | 1.426e-3 | 3.923e-3 | 0.964          | 13.036 | 6.708e-3 | 3.924e-3 | -0.849       | 11.407 | 7.556e-2 | 4.801e-2 | 1.814          | 12.371 | 3.726e-5 | 2.245e-5 |                         |     |       |       |    |    |    |   |   |   |
|               | AAL95258.1   Hydrolase                                 |        |          |          |            |        |          |          |                |        |          |          |                |        |          |          |              |        |          |          |                |        |          |          |                         |     |       |       |    |    |    |   |   |   |
| <b>FN1063</b> | 1.195                                                  | 8.197  | 1.172e-1 | 2.768e-1 | 1.285      | 8.472  | 8.544e-3 | 3.876e-2 | -1.399         | 5.399  |          |          | -2.594         | 6.798  |          |          | 0.090        | 9.667  | 4.069e-1 | 8.958e-1 | -2.684         | 7.073  |          |          |                         |     |       |       |    |    |    |   |   |   |
|               | AAL95259.1   N-acyl-L-amino acid amidohydrolase        |        |          |          |            |        |          |          |                |        |          |          |                |        |          |          |              |        |          |          |                |        |          |          |                         |     |       |       |    |    |    |   |   |   |
| <b>FN1066</b> | -0.017                                                 | 6.272  | 3.01e-1  | 9.601e-1 | 0.902      | 7.375  | 1.146e-5 | 7.309e-6 | 0.018          | 6.103  | 1.388e-1 | 8.16e-1  | 0.035          | 6.290  | 2.769e-1 | 9.179e-1 | 0.919        | 7.358  | 5.128e-2 | 2.383e-2 | -0.884         | 7.393  | 2.037e-5 | 9.641e-6 |                         |     |       |       |    |    |    |   |   |   |
|               | AAL95262.1   Exodeoxyribonuclease VII large subunit    |        |          |          |            |        |          |          |                |        |          |          |                |        |          |          |              |        |          |          |                |        |          |          |                         |     |       |       |    |    |    |   |   |   |
| <b>FN1067</b> | -1.650                                                 | 11.075 | 8.144e-4 | 3.35e-4  | -0.182     | 12.727 | 3.395e-2 | 1.836e-1 | -1.263         | 11.258 | 4.003e-4 | 7.519e-4 | 0.386          | 9.812  | 1.109e-1 | 2.592e-1 | 1.468        | 11.077 | 6.324e-3 | 8.334e-4 | -1.081         | 11.464 | 3.276e-4 | 4.341e-4 |                         |     |       |       |    |    |    |   |   |   |
|               | AAL95263.1   Tetratricopeptide repeat family protein   |        |          |          |            |        |          |          |                |        |          |          |                |        |          |          |              |        |          |          |                |        |          |          |                         |     |       |       |    |    |    |   |   |   |
| <b>FN1068</b> |                                                        |        |          |          |            |        |          |          |                |        |          |          |                |        |          |          | 0.658        | 7.502  | 1.579e-1 | 2.093e-1 |                |        |          |          |                         |     |       |       |    |    |    |   |   |   |
|               | AAL95264.1   Smf protein                               |        |          |          |            |        |          |          |                |        |          |          |                |        |          |          |              |        |          |          |                |        |          |          |                         |     |       |       |    |    |    |   |   |   |
| <b>FN1069</b> | -0.652                                                 | 12.442 | 4.102e-4 | 1.116e-4 | -1.288     | 11.991 | 5.692e-4 | 1.452e-3 | -0.952         | 11.939 | 2.083e-4 | 3.089e-4 | -0.299         | 11.491 | 1.064e-2 | 8.34e-3  | -0.636       | 11.338 | 7.169e-2 | 4.331e-2 | 0.337          | 11.039 | 5.03e-2  | 2.244e-1 |                         |     |       |       |    |    |    |   |   |   |
|               | AAL95265.1   DNA topoisomerase I                       |        |          |          |            |        |          |          |                |        |          |          |                |        |          |          |              |        |          |          |                |        |          |          |                         |     |       |       |    |    |    |   |   |   |
| <b>FN1070</b> | -1.251                                                 | 7.591  |          |          | -1.303     | 7.724  | 9.517e-4 | 2.805e-3 | -0.598         | 8.041  | 3.333e-3 | 1.118e-2 | 0.653          | 6.993  |          |          | -0.052       | 6.472  |          |          | 0.705          | 7.125  | 9.987e-3 | 3.497e-2 |                         |     |       |       |    |    |    |   |   |   |
|               | AAL95266.1   Glucose inhibited division protein A      |        |          |          |            |        |          |          |                |        |          |          |                |        |          |          |              |        |          |          |                |        |          |          |                         |     |       |       |    |    |    |   |   |   |
| <b>FN1071</b> |                                                        |        |          |          | -0.484     | 4.484  |          |          | 0.295          | 4.875  |          |          |                |        |          |          |              |        |          |          |                |        | 0.779    | 4.779    |                         |     |       |       |    |    |    |   |   |   |
|               | AAL95267.1   Integrase/recombinase                     |        |          |          |            |        |          |          |                |        |          |          |                |        |          |          |              |        |          |          |                |        |          |          |                         |     |       |       |    |    |    |   |   |   |
| <b>FN1072</b> | -0.740                                                 | 11.295 | 5.045e-3 | 4.61e-3  | -1.506     | 10.713 | 3.42e-4  | 7.616e-4 | -1.230         | 10.601 | 5.007e-5 | 4.1e-5   | -0.490         | 10.065 | 5.198e-2 | 8.445e-2 | -0.766       | 9.973  | 7.671e-2 | 4.95e-2  | 0.276          | 9.483  | 8.59e-2  | 4.065e-1 |                         |     |       |       |    |    |    |   |   |   |
|               | AAL95268.1   GTP-binding protein                       |        |          |          |            |        |          |          |                |        |          |          |                |        |          |          |              |        |          |          |                |        |          |          |                         |     |       |       |    |    |    |   |   |   |
| <b>FN1073</b> | -1.142                                                 | 6.312  |          |          | -0.586     | 7.052  | 3.602e-3 | 1.414e-2 | -1.682         | 5.567  |          |          | -0.541         | 4.629  |          |          | 0.556        | 5.911  |          |          | -1.097         | 5.370  |          |          |                         |     |       |       |    |    |    |   |   |   |
|               | AAL95269.1   Hypothetical protein                      |        |          |          |            |        |          |          |                |        |          |          |                |        |          |          |              |        |          |          |                |        |          |          |                         |     |       |       |    |    |    |   |   |   |
| <b>FN1074</b> | -0.644                                                 | 9.742  | 1.966e-2 | 2.653e-2 | -0.271     | 10.300 | 1.087e-2 | 5.138e-2 | -0.890         | 9.292  | 1.448e-3 | 4.01e-3  | -0.246         | 8.852  | 1.45e-1  | 3.834e-1 | 0.373        | 9.655  | 1.244e-1 | 1.284e-1 | -0.619         | 9.409  | 3.889e-3 | 1.073e-2 |                         |     |       |       |    |    |    |   |   |   |
|               | AAL95270.1   Signal recognition particle receptor FtsY |        |          |          |            |        |          |          |                |        |          |          |                |        |          |          |              |        |          |          |                |        |          |          |                         |     |       |       |    |    |    |   |   |   |
| <b>FN1075</b> | AAL95271.1   Hypothetical protein                      |        |          |          |            |        |          |          |                |        |          |          |                |        |          |          |              |        |          |          |                |        |          |          |                         |     |       |       |    |    |    |   |   |   |
| <b>FN1077</b> | 2.041                                                  | 8.217  |          |          | 0.234      | 6.594  |          |          | 2.394          | 8.366  |          |          | 0.353          | 10.611 |          |          | -1.808       | 8.636  |          |          | 2.160          | 8.988  | 2.331e-4 | 2.717e-4 |                         |     |       |       |    |    |    |   |   |   |
|               | AAL95273.1   Hypothetical protein                      |        |          |          |            |        |          |          |                |        |          |          |                |        |          |          |              |        |          |          |                |        |          |          |                         |     |       |       |    |    |    |   |   |   |

Show detected proteins only

Show all proteins

Filter by category:

GO: amino acid transport

Proteins found: 1424

Enter (or paste) list of ORFs

Find ORFs

Test

q-Value

p-Value

Cutoff

.005

Dot Plots

Dot Plots

| Signif | Direction | Applies To   |
|--------|-----------|--------------|
| yes    | +         | ratios, bars |
| no     | n/a       | bars         |
| yes    | -         | ratios, bars |
| yes    | +         | p-, q-Values |
| yes    | -         | p-, q-Values |

FnPg vs Fn

FnPgSg vs FnPg

FnSg vs FnPg

FnSg vs Fn

FnPgSg vs FnSg

FnPg vs Fn

FnPgSg vs FnPg

FnSg vs FnPg

FnPgSg vs FnSg

Fn Summary Table

FnPg vs Fn

FnSg vs Fn

FnPgSg vs Fn

FnPgSg vs FnPg

FnSg vs FnPg

FnPgSg vs FnSg

Fn Coverage

| ORF           | FnPg vs Fn                                                                         |        |          |          | FnSg vs Fn    |        |          |          | FnPgSg vs Fn  |        |          |          | FnPgSg vs FnPg |        |          |          | FnSg vs FnPg |        |          |          | FnPgSg vs FnSg |        |          |          | Log <sub>2</sub> Ratios |     |       |       |    |    |    |   |   |   |
|---------------|------------------------------------------------------------------------------------|--------|----------|----------|---------------|--------|----------|----------|---------------|--------|----------|----------|----------------|--------|----------|----------|--------------|--------|----------|----------|----------------|--------|----------|----------|-------------------------|-----|-------|-------|----|----|----|---|---|---|
|               | Ratio                                                                              | Sum    | q-Val    | p-Val    | Ratio         | Sum    | q-Val    | p-Val    | Ratio         | Sum    | q-Val    | p-Val    | Ratio          | Sum    | q-Val    | p-Val    | Ratio        | Sum    | q-Val    | p-Val    | Ratio          | Sum    | q-Val    | p-Val    | Ratio                   | Sum | q-Val | p-Val | -6 | -4 | -2 | 0 | 2 | 4 |
| <b>FN1078</b> | 0.316                                                                              | 15.414 | 5.335e-2 | 9.794e-2 | -0.089        | 15.193 | 5.043e-2 | 2.817e-1 | -0.160        | 14.734 | 5.6e-2   | 2.94e-1  | -0.476         | 15.254 | 3.081e-2 | 3.954e-2 | -0.405       | 15.509 | 8.587e-2 | 6.27e-2  | -0.071         | 15.034 | 1.212e-1 | 5.969e-1 |                         |     |       |       |    |    |    |   |   |   |
|               | AAL95274.1   Hypothetical exported 24-amino acid repeat protein                    |        |          |          |               |        |          |          |               |        |          |          |                |        |          |          |              |        |          |          |                |        |          |          |                         |     |       |       |    |    |    |   |   |   |
| <b>FN1079</b> | 0.523                                                                              | 18.003 | 1.197e-1 | 2.843e-1 | <b>0.970</b>  | 18.635 | 7.349e-4 | 2.037e-3 | <b>0.561</b>  | 17.838 | 1.771e-3 | 5.207e-3 | 0.039          | 18.565 | 2.765e-1 | 9.161e-1 | 0.447        | 19.158 | 1.624e-1 | 2.199e-1 | <b>-0.408</b>  | 19.196 | 3.785e-3 | 1.035e-2 |                         |     |       |       |    |    |    |   |   |   |
|               | AAL95275.1   Neutrophil-activating protein A                                       |        |          |          |               |        |          |          |               |        |          |          |                |        |          |          |              |        |          |          |                |        |          |          |                         |     |       |       |    |    |    |   |   |   |
| <b>FN1080</b> | <b>-0.972</b>                                                                      | 4.632  | 3.24e-3  | 2.504e-3 | 0.710         | 6.498  | 5.753e-3 | 2.432e-2 | -0.224        | 5.175  | 3.174e-2 | 1.536e-1 | <b>0.748</b>   | 4.408  | 3.152e-3 | 1.322e-3 | 1.682        | 5.526  | 2.047e-2 | 4.82e-3  | -0.934         | 6.274  | 5.287e-3 | 1.613e-2 |                         |     |       |       |    |    |    |   |   |   |
|               | AAL95276.1   Export ABC transporter                                                |        |          |          |               |        |          |          |               |        |          |          |                |        |          |          |              |        |          |          |                |        |          |          |                         |     |       |       |    |    |    |   |   |   |
| <b>FN1081</b> | -0.113                                                                             | 10.309 |          |          |               |        |          |          | <b>-0.891</b> | 9.327  | 1.83e-3  | 5.426e-3 | -0.778         | 9.418  |          |          |              |        |          |          |                |        |          |          |                         |     |       |       |    |    |    |   |   |   |
|               | AAL95277.1   unknown                                                               |        |          |          |               |        |          |          |               |        |          |          |                |        |          |          |              |        |          |          |                |        |          |          |                         |     |       |       |    |    |    |   |   |   |
| <b>FN1082</b> |                                                                                    |        |          |          |               |        |          |          |               |        |          |          |                |        |          |          |              |        |          |          |                |        |          |          |                         |     |       |       |    |    |    |   |   |   |
|               | AAL95278.1   unknown                                                               |        |          |          |               |        |          |          |               |        |          |          |                |        |          |          |              |        |          |          |                |        |          |          |                         |     |       |       |    |    |    |   |   |   |
| <b>FN1084</b> | <b>-1.661</b>                                                                      | 11.727 | 1.27e-3  | 6.878e-4 | <b>-2.644</b> | 10.928 | 5.242e-4 | 1.307e-3 | -0.039        | 13.144 | 1.443e-1 | 8.537e-1 | 1.622          | 11.687 | 7.835e-3 | 5.122e-3 | -0.983       | 9.267  | 8.285e-2 | 5.811e-2 | <b>2.604</b>   | 10.889 | 2.093e-3 | 4.89e-3  |                         |     |       |       |    |    |    |   |   |   |
|               | AAL95280.1   unknown                                                               |        |          |          |               |        |          |          |               |        |          |          |                |        |          |          |              |        |          |          |                |        |          |          |                         |     |       |       |    |    |    |   |   |   |
| <b>FN1085</b> | <b>1.380</b>                                                                       | 12.544 | 3.034e-3 | 2.278e-3 | <b>1.003</b>  | 12.351 | 6.321e-4 | 1.663e-3 | 0.163         | 11.123 | 7.055e-2 | 3.794e-1 | <b>-1.217</b>  | 12.707 | 1.667e-3 | 5.287e-4 | -0.378       | 13.731 | 5.469e-2 | 2.697e-2 | <b>-0.840</b>  | 12.514 | 7.008e-4 | 1.201e-3 |                         |     |       |       |    |    |    |   |   |   |
|               | AAL95281.1   4-methyl-5(B-hydroxyethyl)-thiazole monophosphate biosynthesis enzyme |        |          |          |               |        |          |          |               |        |          |          |                |        |          |          |              |        |          |          |                |        |          |          |                         |     |       |       |    |    |    |   |   |   |
| <b>FN1086</b> | -0.345                                                                             | 5.960  |          |          | 1.114         | 7.603  | 7.851e-3 | 3.51e-2  | 0.388         | 6.489  | 5.178e-2 | 2.69e-1  | 0.733          | 6.348  |          |          | 1.459        | 7.258  |          |          | -0.726         | 7.992  | 2.121e-2 | 8.449e-2 |                         |     |       |       |    |    |    |   |   |   |
|               | AAL95282.1   Transporter                                                           |        |          |          |               |        |          |          |               |        |          |          |                |        |          |          |              |        |          |          |                |        |          |          |                         |     |       |       |    |    |    |   |   |   |
| <b>FN1088</b> | -0.324                                                                             | 9.206  | 8.026e-2 | 1.707e-1 | <b>0.353</b>  | 10.067 | 7.738e-4 | 2.19e-3  | <b>0.379</b>  | 9.704  | 3.74e-3  | 1.283e-2 | 0.703          | 9.585  | 1.4e-2   | 1.262e-2 | 0.677        | 9.744  | 4.406e-2 | 1.794e-2 | 0.025          | 10.446 | 1.533e-1 | 7.834e-1 |                         |     |       |       |    |    |    |   |   |   |
|               | AAL95284.1   NADH oxidase                                                          |        |          |          |               |        |          |          |               |        |          |          |                |        |          |          |              |        |          |          |                |        |          |          |                         |     |       |       |    |    |    |   |   |   |
| <b>FN1089</b> | 2.082                                                                              | 12.161 | 1.92e-2  | 2.572e-2 | <b>2.829</b>  | 13.093 | 6.809e-4 | 1.836e-3 | -0.071        | 9.804  | 1.148e-1 | 6.566e-1 | -2.153         | 12.090 | 2.185e-2 | 2.41e-2  | 0.747        | 15.175 | 5.694e-2 | 2.879e-2 | <b>-2.901</b>  | 13.022 | 8.523e-4 | 1.576e-3 |                         |     |       |       |    |    |    |   |   |   |
|               | AAL95285.1   ATP-binding protein (contains P-loop)                                 |        |          |          |               |        |          |          |               |        |          |          |                |        |          |          |              |        |          |          |                |        |          |          |                         |     |       |       |    |    |    |   |   |   |
| <b>FN1091</b> | <b>-1.787</b>                                                                      | 7.371  | 8.297e-4 | 3.461e-4 | <b>-0.843</b> | 8.500  | 2.384e-3 | 8.445e-3 | <b>-0.748</b> | 8.207  | 3.136e-4 | 5.364e-4 | 1.040          | 6.623  | 9.028e-3 | 6.443e-3 | 0.944        | 6.713  | 7.9e-2   | 5.261e-2 | 0.095          | 7.752  | 1.414e-1 | 7.125e-1 |                         |     |       |       |    |    |    |   |   |   |
|               | AAL95287.1   Sigma factor sigB regulation protein rsbU                             |        |          |          |               |        |          |          |               |        |          |          |                |        |          |          |              |        |          |          |                |        |          |          |                         |     |       |       |    |    |    |   |   |   |
| <b>FN1092</b> | 0.197                                                                              | 10.888 | 2.661e-1 | 8.086e-1 | <b>0.908</b>  | 11.784 | 1.32e-3  | 4.169e-3 | -0.497        | 9.991  | 4.951e-2 | 2.558e-1 | -0.693         | 10.392 | 1.753e-1 | 4.947e-1 | 0.711        | 11.981 | 1.841e-1 | 2.727e-1 | <b>-1.405</b>  | 11.288 | 3.51e-3  | 9.371e-3 |                         |     |       |       |    |    |    |   |   |   |
|               | AAL95288.1   Hypothetical protein                                                  |        |          |          |               |        |          |          |               |        |          |          |                |        |          |          |              |        |          |          |                |        |          |          |                         |     |       |       |    |    |    |   |   |   |
| <b>FN1093</b> | <b>-1.444</b>                                                                      | 11.607 | 7.89e-4  | 3.171e-4 | <b>-1.931</b> | 11.305 | 1.177e-4 | 1.931e-4 | <b>-0.599</b> | 12.248 | 8.443e-6 | 2.533e-6 | 0.845          | 11.009 | 6.844e-3 | 4.056e-3 | -0.487       | 9.861  | 1.025e-1 | 8.896e-2 | <b>1.332</b>   | 10.706 | 8.764e-4 | 1.633e-3 |                         |     |       |       |    |    |    |   |   |   |
|               | AAL95289.1   Hypothetical protein                                                  |        |          |          |               |        |          |          |               |        |          |          |                |        |          |          |              |        |          |          |                |        |          |          |                         |     |       |       |    |    |    |   |   |   |
| <b>FN1094</b> |                                                                                    |        |          |          |               |        |          |          |               |        |          |          |                |        |          |          | -0.782       | 9.491  |          |          |                |        |          |          |                         |     |       |       |    |    |    |   |   |   |
|               | AAL95290.1   Dolichol-phosphate mannosyltransferase                                |        |          |          |               |        |          |          |               |        |          |          |                |        |          |          |              |        |          |          |                |        |          |          |                         |     |       |       |    |    |    |   |   |   |
| <b>FN1095</b> |                                                                                    |        |          |          |               |        |          |          |               |        |          |          |                |        |          |          |              |        |          |          |                |        |          |          |                         |     |       |       |    |    |    |   |   |   |
|               | AAL95291.1   unknown                                                               |        |          |          |               |        |          |          |               |        |          |          |                |        |          |          |              |        |          |          |                |        |          |          |                         |     |       |       |    |    |    |   |   |   |
| <b>FN1096</b> | -0.169                                                                             | 10.967 | 2.421e-1 | 7.121e-1 | <b>-0.910</b> | 10.411 | 7.755e-4 | 2.196e-3 | -0.245        | 10.688 | 7.222e-2 | 3.895e-1 | -0.076         | 10.723 | 2.707e-1 | 8.896e-1 | -0.741       | 10.242 | 1.873e-1 | 2.807e-1 | 0.666          | 10.166 | 3.181e-2 | 1.332e-1 |                         |     |       |       |    |    |    |   |   |   |
|               | AAL95292.1   Hypothetical protein                                                  |        |          |          |               |        |          |          |               |        |          |          |                |        |          |          |              |        |          |          |                |        |          |          |                         |     |       |       |    |    |    |   |   |   |
| <b>FN1097</b> | -1.064                                                                             | 11.373 |          |          | -3.311        | 9.311  |          |          | <b>-2.213</b> | 10.020 | 2.738e-3 | 8.822e-3 | -1.149         | 9.161  |          |          | -2.247       | 8.247  |          |          | 1.098          | 7.098  |          |          |                         |     |       |       |    |    |    |   |   |   |
|               | AAL95293.1   Hypothetical protein                                                  |        |          |          |               |        |          |          |               |        |          |          |                |        |          |          |              |        |          |          |                |        |          |          |                         |     |       |       |    |    |    |   |   |   |

Show detected proteins only  
 Show all proteins  
 Filter by category:

Proteins found: 1424

Enter (or paste) list of ORFs

Find ORFs

Test Cutoff

q-Value .005

p-Value

Dot Plots

| Signif | Direction | Applies To   |
|--------|-----------|--------------|
| yes    | +         | ratios, bars |
| no     | n/a       | bars         |
| yes    | -         | ratios, bars |
| yes    | +         | p-, q-Values |
| yes    | -         | p-, q-Values |

FnPg vs Fn — █ — FnSg vs Fn  
 FnPgSg vs Fn — █ — FnPgSg vs FnPg  
 FnSg vs FnPg — █ — FnPgSg vs FnSg

Fn Summary Table

FnPg vs Fn

FnSg vs Fn

FnPgSg vs Fn

FnPgSg vs FnPg

FnSg vs FnPg

FnPgSg vs FnSg

Fn Coverage

| ORF           | FnPg vs Fn                                           |        |          |          | FnSg vs Fn |        |          |          | FnPgSg vs Fn |        |          |          | FnPgSg vs FnPg |        |          |          | FnSg vs FnPg |        |          |          | FnPgSg vs FnSg |        |          |          | Log <sub>2</sub> Ratios |       |       |       |    |    |    |   |   |   |   |  |
|---------------|------------------------------------------------------|--------|----------|----------|------------|--------|----------|----------|--------------|--------|----------|----------|----------------|--------|----------|----------|--------------|--------|----------|----------|----------------|--------|----------|----------|-------------------------|-------|-------|-------|----|----|----|---|---|---|---|--|
|               | Ratio                                                | Sum    | q-Val    | p-Val    | Ratio      | Sum    | q-Val    | p-Val    | Ratio        | Sum    | q-Val    | p-Val    | Ratio          | Sum    | q-Val    | p-Val    | Ratio        | Sum    | q-Val    | p-Val    | Ratio          | Sum    | q-Val    | p-Val    | Ratio                   | Sum   | q-Val | p-Val | -6 | -4 | -2 | 0 | 2 | 4 | 6 |  |
| <b>FN1101</b> |                                                      |        |          |          | 0.305      | 5.695  |          |          | -0.916       | 4.086  |          |          |                |        |          |          |              |        |          |          |                |        |          |          | -1.221                  | 4.779 |       |       |    |    |    |   |   |   |   |  |
|               | AAL95297.1   ATPase                                  |        |          |          |            |        |          |          |              |        |          |          |                |        |          |          |              |        |          |          |                |        |          |          |                         |       |       |       |    |    |    |   |   |   |   |  |
| <b>FN1102</b> |                                                      |        |          |          | -2.018     | 8.662  |          |          |              |        |          |          |                |        |          |          |              |        |          |          |                |        |          |          |                         |       |       |       |    |    |    |   |   |   |   |  |
|               | AAL95298.1   tRNA 2'phosphotransferase               |        |          |          |            |        |          |          |              |        |          |          |                |        |          |          |              |        |          |          |                |        |          |          |                         |       |       |       |    |    |    |   |   |   |   |  |
| <b>FN1103</b> | -1.735                                               | 11.758 | 2.231e-4 | 4.514e-5 | -0.839     | 12.838 | 1.675e-4 | 3.098e-4 | -2.179       | 11.110 | 1.714e-5 | 7.156e-6 | -0.444         | 9.579  | 6.127e-2 | 1.078e-1 | 0.896        | 11.103 | 2.65e-2  | 7.402e-3 | -1.340         | 10.659 | 5.227e-4 | 7.95e-4  |                         |       |       |       |    |    |    |   |   |   |   |  |
|               | AAL95299.1   Excinuclease ABC subunit A              |        |          |          |            |        |          |          |              |        |          |          |                |        |          |          |              |        |          |          |                |        |          |          |                         |       |       |       |    |    |    |   |   |   |   |  |
| <b>FN1104</b> |                                                      |        |          |          |            |        |          |          |              |        |          |          |                |        |          |          |              |        |          |          |                |        |          |          |                         |       |       |       |    |    |    |   |   |   |   |  |
|               | AAL95300.1   Holliday junction DNA helicase ruvA     |        |          |          |            |        |          |          |              |        |          |          |                |        |          |          |              |        |          |          |                |        |          |          |                         |       |       |       |    |    |    |   |   |   |   |  |
| <b>FN1105</b> | -0.290                                               | 13.052 | 1.489e-1 | 3.76e-1  | -1.252     | 12.275 | 5.963e-4 | 1.541e-3 | -0.344       | 12.794 | 7.461e-3 | 2.925e-2 | -0.054         | 12.708 | 2.666e-1 | 8.714e-1 | -0.962       | 11.985 | 1.112e-1 | 1.035e-1 | 0.907          | 11.931 | 7.415e-7 | 8.423e-8 |                         |       |       |       |    |    |    |   |   |   |   |  |
|               | AAL95301.1   Hypothetical protein                    |        |          |          |            |        |          |          |              |        |          |          |                |        |          |          |              |        |          |          |                |        |          |          |                         |       |       |       |    |    |    |   |   |   |   |  |
| <b>FN1106</b> | -0.657                                               | 12.631 | 1.085e-3 | 5.357e-4 | -0.775     | 12.697 | 3.518e-4 | 7.885e-4 | -1.220       | 11.864 | 3.345e-4 | 5.862e-4 | -0.563         | 11.411 | 1.249e-2 | 1.057e-2 | -0.118       | 12.041 | 2.593e-1 | 4.571e-1 | -0.445         | 11.477 | 1.421e-2 | 5.298e-2 |                         |       |       |       |    |    |    |   |   |   |   |  |
|               | AAL95302.1   L-serine dehydratase                    |        |          |          |            |        |          |          |              |        |          |          |                |        |          |          |              |        |          |          |                |        |          |          |                         |       |       |       |    |    |    |   |   |   |   |  |
| <b>FN1111</b> |                                                      |        |          |          | 0.485      | 7.453  |          |          | -0.122       | 6.457  |          |          |                |        |          |          |              |        |          |          | -0.607         | 7.330  | 2.488e-3 | 6.108e-3 |                         |       |       |       |    |    |    |   |   |   |   |  |
|               | AAL95307.1   Dipeptide-binding protein               |        |          |          |            |        |          |          |              |        |          |          |                |        |          |          |              |        |          |          |                |        |          |          |                         |       |       |       |    |    |    |   |   |   |   |  |
| <b>FN1117</b> | -0.613                                               | 10.930 | 8.015e-1 | 1.704e-1 | -1.871     | 9.855  | 8.249e-4 | 2.362e-3 | 0.673        | 12.012 | 2.563e-3 | 8.139e-3 | 1.286          | 11.603 | 1.516e-2 | 1.439e-2 | -1.259       | 9.243  | 1.266e-1 | 1.329e-1 | 2.544          | 10.529 | 1.757e-5 | 7.374e-6 |                         |       |       |       |    |    |    |   |   |   |   |  |
|               | AAL95313.1   LSU ribosomal protein L21P              |        |          |          |            |        |          |          |              |        |          |          |                |        |          |          |              |        |          |          |                |        |          |          |                         |       |       |       |    |    |    |   |   |   |   |  |
| <b>FN1119</b> | -0.859                                               | 13.803 | 3.573e-2 | 5.682e-2 | -2.497     | 12.350 | 1.089e-5 | 6.706e-6 | 0.519        | 14.977 | 6.182e-4 | 1.308e-3 | 1.378          | 14.322 | 9.072e-3 | 6.491e-3 | -1.638       | 11.491 | 1.031e-1 | 8.995e-2 | 3.015          | 12.869 | 2.552e-5 | 1.297e-5 |                         |       |       |       |    |    |    |   |   |   |   |  |
|               | AAL95315.1   LSU ribosomal protein L27P              |        |          |          |            |        |          |          |              |        |          |          |                |        |          |          |              |        |          |          |                |        |          |          |                         |       |       |       |    |    |    |   |   |   |   |  |
| <b>FN1120</b> | 0.799                                                | 15.297 | 6.978e-3 | 7.186e-3 | 0.750      | 15.433 | 8.342e-4 | 2.394e-3 | -0.154       | 14.141 | 5.19e-2  | 2.697e-1 | -0.953         | 15.144 | 1.162e-2 | 9.5e-3   | -0.049       | 16.232 | 3.515e-1 | 7.078e-1 | -0.904         | 15.279 | 1.126e-5 | 3.526e-6 |                         |       |       |       |    |    |    |   |   |   |   |  |
|               | AAL95316.1   Phosphoenolpyruvate carboxykinase (ATP) |        |          |          |            |        |          |          |              |        |          |          |                |        |          |          |              |        |          |          |                |        |          |          |                         |       |       |       |    |    |    |   |   |   |   |  |
| <b>FN1121</b> | -0.372                                               | 12.103 | 4.579e-2 | 7.952e-2 | -0.163     | 12.497 | 2.032e-2 | 1.042e-1 | 0.155        | 12.426 | 3.124e-2 | 1.507e-1 | 0.527          | 12.258 | 2.112e-2 | 2.294e-2 | 0.209        | 12.124 | 1.857e-1 | 2.765e-1 | 0.318          | 12.651 | 5.013e-3 | 1.509e-2 |                         |       |       |       |    |    |    |   |   |   |   |  |
|               | AAL95317.1   hypothetical cytosolic protein          |        |          |          |            |        |          |          |              |        |          |          |                |        |          |          |              |        |          |          |                |        |          |          |                         |       |       |       |    |    |    |   |   |   |   |  |
| <b>FN1122</b> | -2.018                                               | 13.763 | 2.365e-3 | 1.621e-3 | -1.834     | 14.132 | 2.495e-4 | 5.036e-4 | -0.692       | 14.885 | 3.039e-3 | 1.003e-2 | 1.326          | 13.071 | 2.949e-4 | 4.086e-5 | 0.184        | 12.114 | 2.358e-1 | 3.999e-1 | 1.142          | 13.439 | 4.401e-4 | 6.299e-4 |                         |       |       |       |    |    |    |   |   |   |   |  |
|               | AAL95318.1   Long-chain-fatty-acid--CoA ligase       |        |          |          |            |        |          |          |              |        |          |          |                |        |          |          |              |        |          |          |                |        |          |          |                         |       |       |       |    |    |    |   |   |   |   |  |
| <b>FN1123</b> | -2.046                                               | 7.413  | 5.593e-5 | 5.847e-6 | -1.550     | 8.094  | 1.478e-3 | 4.775e-3 | 0.332        | 9.587  | 7.741e-2 | 4.211e-1 | 2.377          | 7.745  | 2.844e-2 | 3.518e-2 | 0.496        | 6.048  | 2.256e-1 | 3.737e-1 | 1.882          | 8.425  | 1.103e-2 | 3.946e-2 |                         |       |       |       |    |    |    |   |   |   |   |  |
|               | AAL95319.1   Thioredoxin-like protein                |        |          |          |            |        |          |          |              |        |          |          |                |        |          |          |              |        |          |          |                |        |          |          |                         |       |       |       |    |    |    |   |   |   |   |  |
| <b>FN1124</b> | -1.027                                               | 16.457 | 1.293e-3 | 7.057e-4 | -0.264     | 17.404 | 3.451e-5 | 3.499e-5 | -0.247       | 17.032 | 5.061e-3 | 1.852e-2 | 0.779          | 16.209 | 1.569e-3 | 4.833e-4 | 0.763        | 16.378 | 1.047e-2 | 1.829e-3 | 0.016          | 17.157 | 1.577e-1 | 8.097e-1 |                         |       |       |       |    |    |    |   |   |   |   |  |
|               | AAL95320.1   Outer membrane porin F                  |        |          |          |            |        |          |          |              |        |          |          |                |        |          |          |              |        |          |          |                |        |          |          |                         |       |       |       |    |    |    |   |   |   |   |  |
| <b>FN1125</b> | 0.845                                                | 11.386 | 1.311e-1 | 3.194e-1 | 1.202      | 11.928 | 1.85e-3  | 6.205e-3 | 0.472        | 10.810 | 1.275e-3 | 3.34e-3  | -0.372         | 11.858 | 1.974e-1 | 5.849e-1 | 0.357        | 12.772 | 2.829e-1 | 5.15e-1  | -0.730         | 12.400 | 5.505e-3 | 1.698e-2 |                         |       |       |       |    |    |    |   |   |   |   |  |
|               | AAL95321.1   LemA protein                            |        |          |          |            |        |          |          |              |        |          |          |                |        |          |          |              |        |          |          |                |        |          |          |                         |       |       |       |    |    |    |   |   |   |   |  |
| <b>FN1127</b> | 1.087                                                | 11.860 | 2.91e-2  | 4.344e-2 | 0.590      | 11.548 | 8.464e-4 | 2.436e-3 | -0.015       | 10.554 | 1.511e-1 | 9.013e-1 | -1.102         | 11.845 | 3.37e-2  | 4.523e-2 | -0.497       | 12.635 | 1.423e-1 | 1.688e-1 | -0.605         | 11.533 | 1.751e-4 | 1.824e-4 |                         |       |       |       |    |    |    |   |   |   |   |  |
|               | AAL95323.1   Hypothetical membrane-spanning protein  |        |          |          |            |        |          |          |              |        |          |          |                |        |          |          |              |        |          |          |                |        |          |          |                         |       |       |       |    |    |    |   |   |   |   |  |
| <b>FN1128</b> | 0.334                                                | 16.075 | 1.092e-1 | 2.535e-1 | -0.399     | 15.526 | 2.826e-4 | 5.924e-4 | -0.418       | 15.119 | 4.669e-4 | 9.141e-4 | -0.752         | 15.657 | 4.541e-2 | 6.888e-2 | -0.734       | 15.860 | 9.162e-2 | 7.223e-2 | -0.018         | 15.108 | 1.414e-1 | 7.122e-1 |                         |       |       |       |    |    |    |   |   |   |   |  |
|               | AAL95324.1   Acylamino-acid-releasing enzyme         |        |          |          |            |        |          |          |              |        |          |          |                |        |          |          |              |        |          |          |                |        |          |          |                         |       |       |       |    |    |    |   |   |   |   |  |

Show detected proteins only

Show all proteins

Filter by category:

GO: amino acid transport

Proteins found: 1424

Enter (or paste) list of ORFs

Find ORFs

Test

q-Value

p-Value

Cutoff

.005

Dot Plots

Dot Plots

| Signif | Direction | Applies To   |
|--------|-----------|--------------|
| yes    | +         | ratios, bars |
| no     | n/a       | bars         |
| yes    | -         | ratios, bars |
| yes    | +         | p-, q-Values |
| yes    | -         | p-, q-Values |

FnPg vs Fn

FnPgSg vs Fn

FnSg vs FnPg

FnPgSg vs FnSg

FnSg vs Fn

FnPgSg vs FnPg

FnSg vs FnPg

FnPgSg vs FnSg

Fn Summary Table

FnPg vs Fn

FnSg vs Fn

FnPgSg vs FnPg

FnPgSg vs FnPg

FnSg vs FnPg

FnPgSg vs FnSg

Fn Coverage

| ORF           | FnPg vs Fn                                                       |        |          |          | FnSg vs Fn |        |          |          | FnPgSg vs FnPg |        |          |          | FnPgSg vs FnPg |        |          |          | FnSg vs FnPg |        |          |          | FnPgSg vs FnSg |        |          |          | Log <sub>2</sub> Ratios |     |       |       |    |    |    |   |   |   |   |  |
|---------------|------------------------------------------------------------------|--------|----------|----------|------------|--------|----------|----------|----------------|--------|----------|----------|----------------|--------|----------|----------|--------------|--------|----------|----------|----------------|--------|----------|----------|-------------------------|-----|-------|-------|----|----|----|---|---|---|---|--|
|               | Ratio                                                            | Sum    | q-Val    | p-Val    | Ratio      | Sum    | q-Val    | p-Val    | Ratio          | Sum    | q-Val    | p-Val    | Ratio          | Sum    | q-Val    | p-Val    | Ratio        | Sum    | q-Val    | p-Val    | Ratio          | Sum    | q-Val    | p-Val    | Ratio                   | Sum | q-Val | p-Val | -6 | -4 | -2 | 0 | 2 | 4 | 6 |  |
| <b>FN1129</b> | -1.843                                                           | 7.013  |          |          | -1.502     | 7.539  | 2.65e-4  | 5.444e-4 | -1.290         | 7.362  | 1.808e-4 | 2.501e-4 | 0.553          | 5.723  |          |          | 0.341        | 5.696  |          |          | 0.212          | 6.249  | 1.142e-1 | 5.575e-1 |                         |     |       |       |    |    |    |   |   |   |   |  |
|               | AAL95325.1   Chromosome partition protein smc                    |        |          |          |            |        |          |          |                |        |          |          |                |        |          |          |              |        |          |          |                |        |          |          |                         |     |       |       |    |    |    |   |   |   |   |  |
| <b>FN1130</b> | -1.596                                                           | 6.239  |          |          | -0.550     | 7.469  |          |          | -0.816         | 6.816  |          |          | 0.780          | 5.424  |          |          | 1.045        | 5.874  |          |          | -0.265         | 6.654  |          |          |                         |     |       |       |    |    |    |   |   |   |   |  |
|               | AAL95326.1   Tetraacyldisaccharide 4'-kinase                     |        |          |          |            |        |          |          |                |        |          |          |                |        |          |          |              |        |          |          |                |        |          |          |                         |     |       |       |    |    |    |   |   |   |   |  |
| <b>FN1131</b> | 0.502                                                            | 6.899  |          |          | -0.484     | 6.098  |          |          | -1.512         | 4.682  |          |          | -2.014         | 5.387  |          |          | -0.985       | 6.600  |          |          | -1.028         | 4.586  |          |          |                         |     |       |       |    |    |    |   |   |   |   |  |
|               | AAL95327.1   Hypothetical protein                                |        |          |          |            |        |          |          |                |        |          |          |                |        |          |          |              |        |          |          |                |        |          |          |                         |     |       |       |    |    |    |   |   |   |   |  |
| <b>FN1133</b> | 0.535                                                            | 10.186 | 1.525e-1 | 3.881e-1 | 0.040      | 9.875  | 1.23e-1  | 7.452e-1 | 0.110          | 9.557  | 7.076e-2 | 3.807e-1 | -0.425         | 10.296 | 1.69e-1  | 4.706e-1 | -0.495       | 10.411 | 2.427e-1 | 4.173e-1 | 0.070          | 9.985  | 1.316e-1 | 6.553e-1 |                         |     |       |       |    |    |    |   |   |   |   |  |
|               | AAL95329.1   N-acetylglucosamine-6-phosphate deacetylase         |        |          |          |            |        |          |          |                |        |          |          |                |        |          |          |              |        |          |          |                |        |          |          |                         |     |       |       |    |    |    |   |   |   |   |  |
| <b>FN1134</b> | -0.750                                                           | 10.293 | 1.882e-2 | 2.506e-2 | -2.614     | 8.614  |          |          | -0.962         | 9.877  | 3.515e-4 | 6.284e-4 | -0.212         | 9.331  | 1.827e-1 | 5.238e-1 | -1.864       | 7.864  |          |          | 1.652          | 7.652  |          |          |                         |     |       |       |    |    |    |   |   |   |   |  |
|               | AAL95330.1   Hypothetical cytosolic protein                      |        |          |          |            |        |          |          |                |        |          |          |                |        |          |          |              |        |          |          |                |        |          |          |                         |     |       |       |    |    |    |   |   |   |   |  |
| <b>FN1135</b> | 0.232                                                            | 15.087 | 2.28e-1  | 6.583e-1 | -0.530     | 14.510 | 1.273e-3 | 3.987e-3 | -0.346         | 14.305 | 2.104e-4 | 3.139e-4 | -0.578         | 14.741 | 1.373e-1 | 3.561e-1 | -0.761       | 14.742 | 1.829e-1 | 2.695e-1 | 0.184          | 14.164 | 2.162e-2 | 8.642e-2 |                         |     |       |       |    |    |    |   |   |   |   |  |
|               | AAL95331.1   Phosphonates-binding protein                        |        |          |          |            |        |          |          |                |        |          |          |                |        |          |          |              |        |          |          |                |        |          |          |                         |     |       |       |    |    |    |   |   |   |   |  |
| <b>FN1136</b> | 1.345                                                            | 7.825  |          |          | 1.407      | 8.072  | 9.993e-4 | 2.976e-3 | 0.355          | 6.632  | 3.615e-5 | 2.421e-5 | -0.989         | 8.181  |          |          | 0.062        | 9.417  |          |          | -1.052         | 8.428  | 2.163e-3 | 5.096e-3 |                         |     |       |       |    |    |    |   |   |   |   |  |
|               | AAL95332.1   Phosphonates transport ATP-binding protein phnC     |        |          |          |            |        |          |          |                |        |          |          |                |        |          |          |              |        |          |          |                |        |          |          |                         |     |       |       |    |    |    |   |   |   |   |  |
| <b>FN1137</b> |                                                                  |        |          |          |            |        |          |          |                |        |          |          |                |        |          |          |              |        |          |          |                |        |          |          |                         |     |       |       |    |    |    |   |   |   |   |  |
|               | AAL95333.1   Phosphonates transport system permease protein phnE |        |          |          |            |        |          |          |                |        |          |          |                |        |          |          |              |        |          |          |                |        |          |          |                         |     |       |       |    |    |    |   |   |   |   |  |
| <b>FN1138</b> | -0.268                                                           | 18.871 | 1.05e-1  | 2.414e-1 | -0.681     | 18.642 | 6.319e-3 | 2.716e-2 | 0.417          | 19.352 | 2.834e-2 | 1.343e-1 | 0.684          | 19.288 | 3.659e-2 | 5.085e-2 | -0.414       | 18.374 | 1.623e-1 | 2.196e-1 | 1.098          | 19.059 | 4.851e-3 | 1.445e-2 |                         |     |       |       |    |    |    |   |   |   |   |  |
|               | AAL95334.1   Hypothetical cytosolic protein                      |        |          |          |            |        |          |          |                |        |          |          |                |        |          |          |              |        |          |          |                |        |          |          |                         |     |       |       |    |    |    |   |   |   |   |  |
| <b>FN1139</b> | 0.086                                                            | 12.492 | 2.847e-1 | 8.874e-1 | 1.010      | 13.601 | 1.441e-3 | 4.628e-3 | -2.980         | 9.223  | 1e-6     | 1.261e-7 | -3.066         | 9.513  | 5.823e-2 | 1.003e-1 | 0.924        | 13.686 | 1.044e-1 | 9.191e-2 | -3.989         | 10.621 | 4.891e-4 | 7.255e-4 |                         |     |       |       |    |    |    |   |   |   |   |  |
|               | AAL95335.1   Activator of (R)-2-hydroxyglutaryl-CoA dehydratase  |        |          |          |            |        |          |          |                |        |          |          |                |        |          |          |              |        |          |          |                |        |          |          |                         |     |       |       |    |    |    |   |   |   |   |  |
| <b>FN1140</b> | 1.396                                                            | 7.892  |          |          | 1.120      | 7.800  | 2.05e-2  | 1.052e-1 |                |        |          |          |                |        |          |          | -0.276       | 9.196  |          |          |                |        |          |          |                         |     |       |       |    |    |    |   |   |   |   |  |
|               | AAL95336.1   hypothetical protein                                |        |          |          |            |        |          |          |                |        |          |          |                |        |          |          |              |        |          |          |                |        |          |          |                         |     |       |       |    |    |    |   |   |   |   |  |
| <b>FN1142</b> | -1.475                                                           | 6.119  |          |          | -1.166     | 6.612  | 3.314e-4 | 7.316e-4 | -2.110         | 5.280  |          |          | -0.635         | 4.009  |          |          | 0.309        | 5.137  |          |          | -0.944         | 4.502  |          |          |                         |     |       |       |    |    |    |   |   |   |   |  |
|               | AAL95338.1   Oxygen-independent coproporphyrinogen III oxidase   |        |          |          |            |        |          |          |                |        |          |          |                |        |          |          |              |        |          |          |                |        |          |          |                         |     |       |       |    |    |    |   |   |   |   |  |
| <b>FN1143</b> | 0.301                                                            | 13.417 | 2.046e-1 | 5.737e-1 | 1.365      | 14.666 | 4.372e-3 | 1.777e-2 | 0.012          | 12.924 | 1.573e-1 | 9.45e-1  | -0.289         | 13.429 | 1.993e-1 | 5.93e-1  | 1.064        | 14.967 | 6.498e-2 | 3.608e-2 | -1.354         | 14.678 | 4.952e-3 | 1.485e-2 |                         |     |       |       |    |    |    |   |   |   |   |  |
|               | AAL95339.1   Glucosamine-6-phosphate isomerase                   |        |          |          |            |        |          |          |                |        |          |          |                |        |          |          |              |        |          |          |                |        |          |          |                         |     |       |       |    |    |    |   |   |   |   |  |
| <b>FN1144</b> | -2.024                                                           | 13.841 | 1.351e-3 | 7.472e-4 | -1.023     | 15.026 | 1.15e-5  | 7.354e-6 | -0.252         | 15.409 | 1.186e-3 | 3.015e-3 | 1.772          | 13.589 | 4.621e-3 | 2.264e-3 | 1.001        | 13.002 | 6.259e-2 | 3.377e-2 | 0.771          | 14.774 | 6.158e-5 | 4.586e-5 |                         |     |       |       |    |    |    |   |   |   |   |  |
|               | AAL95340.1   Hypothetical Exported Protein                       |        |          |          |            |        |          |          |                |        |          |          |                |        |          |          |              |        |          |          |                |        |          |          |                         |     |       |       |    |    |    |   |   |   |   |  |
| <b>FN1145</b> | -0.160                                                           | 8.872  | 2.423e-1 | 7.13e-1  | -0.261     | 8.956  | 8.845e-2 | 5.156e-1 | -0.030         | 8.799  | 1.475e-1 | 8.757e-1 | 0.131          | 8.843  | 2.379e-1 | 7.483e-1 | -0.101       | 8.796  | 3.956e-1 | 8.544e-1 | 0.231          | 8.926  | 1.092e-1 | 5.303e-1 |                         |     |       |       |    |    |    |   |   |   |   |  |
|               | AAL95341.1   Oligoendopeptidase F                                |        |          |          |            |        |          |          |                |        |          |          |                |        |          |          |              |        |          |          |                |        |          |          |                         |     |       |       |    |    |    |   |   |   |   |  |
| <b>FN1146</b> | -1.752                                                           | 7.831  |          |          |            |        |          |          | -0.320         | 9.059  | 1.974e-2 | 8.9e-2   | 1.432          | 7.511  |          |          |              |        |          |          |                |        |          |          |                         |     |       |       |    |    |    |   |   |   |   |  |
|               | AAL95342.1   Hypothetical exported 24-amino acid repeat protein  |        |          |          |            |        |          |          |                |        |          |          |                |        |          |          |              |        |          |          |                |        |          |          |                         |     |       |       |    |    |    |   |   |   |   |  |
| <b>FN1147</b> |                                                                  |        |          |          |            |        |          |          | 1.021          | 9.901  | 9.502e-3 | 3.89e-2  |                |        |          |          |              |        |          |          |                |        |          |          |                         |     |       |       |    |    |    |   |   |   |   |  |
|               | AAL95343.1   Hypothetical protein                                |        |          |          |            |        |          |          |                |        |          |          |                |        |          |          |              |        |          |          |                |        |          |          |                         |     |       |       |    |    |    |   |   |   |   |  |

Show detected proteins only

Show all proteins

Filter by category:

GO: amino acid transport

Proteins found: 1424

Enter (or paste) list of ORFs

Find ORFs

Test Cutoff

q-Value .005

p-Value

Dot Plots

Dot Plots

| Signif | Direction | Applies To   |
|--------|-----------|--------------|
| yes    | +         | ratios, bars |
| no     | n/a       | bars         |
| yes    | -         | ratios, bars |
| yes    | +         | p-, q-Values |
| yes    | -         | p-, q-Values |

FnPg vs Fn

FnPgSg vs FnPg

FnSg vs FnPg

FnSg vs Fn

FnPgSg vs FnSg

Fn Summary Table

FnPg vs Fn

FnSg vs Fn

FnPgSg vs Fn

FnPgSg vs FnPg

FnSg vs FnPg

FnPgSg vs FnSg

Fn Coverage

| ORF           | FnPg vs Fn                                                  |        |          |          | FnSg vs Fn |        |          |          | FnPgSg vs Fn |        |          |          | FnPgSg vs FnPg |        |          |          | FnSg vs FnPg |        |          |          | FnPgSg vs FnSg |        |          |          | Log <sub>2</sub> Ratios |     |       |       |    |    |    |   |   |   |   |  |
|---------------|-------------------------------------------------------------|--------|----------|----------|------------|--------|----------|----------|--------------|--------|----------|----------|----------------|--------|----------|----------|--------------|--------|----------|----------|----------------|--------|----------|----------|-------------------------|-----|-------|-------|----|----|----|---|---|---|---|--|
|               | Ratio                                                       | Sum    | q-Val    | p-Val    | Ratio      | Sum    | q-Val    | p-Val    | Ratio        | Sum    | q-Val    | p-Val    | Ratio          | Sum    | q-Val    | p-Val    | Ratio        | Sum    | q-Val    | p-Val    | Ratio          | Sum    | q-Val    | p-Val    | Ratio                   | Sum | q-Val | p-Val | -6 | -4 | -2 | 0 | 2 | 4 | 6 |  |
| <b>FN1148</b> | 0.121                                                       | 11.123 | 2.843e-1 | 8.857e-1 | 0.232      | 11.418 | 5.646e-3 | 2.379e-2 | -0.087       | 10.711 | 5.158e-2 | 2.678e-1 | -0.208         | 11.035 | 2.527e-1 | 8.105e-1 | 0.111        | 11.539 | 4.044e-1 | 8.864e-1 | -0.319         | 11.331 | 2.232e-3 | 5.304e-3 |                         |     |       |       |    |    |    |   |   |   |   |  |
|               | AAL95344.1   Serine/threonine sodium symporter              |        |          |          |            |        |          |          |              |        |          |          |                |        |          |          |              |        |          |          |                |        |          |          |                         |     |       |       |    |    |    |   |   |   |   |  |
| <b>FN1149</b> | -0.897                                                      | 7.170  | 1.237e-4 | 1.925e-5 | -0.203     | 8.048  | 2.973e-3 | 1.11e-2  | -1.099       | 6.764  | 5.055e-3 | 1.849e-2 | -0.202         | 6.072  | 2.01e-1  | 6.004e-1 | 0.693        | 7.151  | 2.336e-3 | 1.566e-4 | -0.895         | 6.949  | 1.095e-2 | 3.909e-2 |                         |     |       |       |    |    |    |   |   |   |   |  |
|               | AAL95345.1   ATP-dependent nuclease subunit A               |        |          |          |            |        |          |          |              |        |          |          |                |        |          |          |              |        |          |          |                |        |          |          |                         |     |       |       |    |    |    |   |   |   |   |  |
| <b>FN1150</b> | -1.199                                                      | 5.199  |          |          | -0.484     | 6.098  |          |          | -0.739       | 5.455  |          |          | 0.459          | 4.459  |          |          | 0.715        | 4.900  |          |          | -0.256         | 5.359  |          |          |                         |     |       |       |    |    |    |   |   |   |   |  |
|               | AAL95346.1   unknown                                        |        |          |          |            |        |          |          |              |        |          |          |                |        |          |          |              |        |          |          |                |        |          |          |                         |     |       |       |    |    |    |   |   |   |   |  |
| <b>FN1152</b> | -0.607                                                      | 13.861 | 5.176e-2 | 9.389e-2 | -0.662     | 13.990 | 9.151e-5 | 1.399e-4 | -0.040       | 14.224 | 9.982e-2 | 5.613e-1 | 0.567          | 13.821 | 6.229e-2 | 1.102e-1 | -0.055       | 13.383 | 4.011e-1 | 8.743e-1 | 0.622          | 13.950 | 1.393e-3 | 2.945e-3 |                         |     |       |       |    |    |    |   |   |   |   |  |
|               | AAL95348.1   Aspartate aminotransferase                     |        |          |          |            |        |          |          |              |        |          |          |                |        |          |          |              |        |          |          |                |        |          |          |                         |     |       |       |    |    |    |   |   |   |   |  |
| <b>FN1153</b> |                                                             |        |          |          |            |        |          |          | 0.032        | 10.393 | 1.326e-1 | 7.737e-1 |                |        |          |          |              |        |          |          |                |        |          |          |                         |     |       |       |    |    |    |   |   |   |   |  |
|               | AAL95349.1   Hypothetical protein                           |        |          |          |            |        |          |          |              |        |          |          |                |        |          |          |              |        |          |          |                |        |          |          |                         |     |       |       |    |    |    |   |   |   |   |  |
| <b>FN1154</b> | 1.123                                                       | 7.521  |          |          | 0.060      | 6.643  |          |          |              |        |          |          |                |        |          |          | -1.063       | 7.766  |          |          |                |        |          |          |                         |     |       |       |    |    |    |   |   |   |   |  |
|               | AAL95350.1   Ribonuclease BN                                |        |          |          |            |        |          |          |              |        |          |          |                |        |          |          |              |        |          |          |                |        |          |          |                         |     |       |       |    |    |    |   |   |   |   |  |
| <b>FN1155</b> |                                                             |        |          |          | -1.457     | 5.766  | 5.269e-3 | 2.197e-2 |              |        |          |          |                |        |          |          |              |        |          |          |                |        |          |          |                         |     |       |       |    |    |    |   |   |   |   |  |
|               | AAL95351.1   Cell division protein ftsI                     |        |          |          |            |        |          |          |              |        |          |          |                |        |          |          |              |        |          |          |                |        |          |          |                         |     |       |       |    |    |    |   |   |   |   |  |
| <b>FN1156</b> |                                                             |        |          |          |            |        |          |          |              |        |          |          |                |        |          |          |              |        |          |          |                |        |          |          |                         |     |       |       |    |    |    |   |   |   |   |  |
|               | AAL95352.1   Primosomal protein N'                          |        |          |          |            |        |          |          |              |        |          |          |                |        |          |          |              |        |          |          |                |        |          |          |                         |     |       |       |    |    |    |   |   |   |   |  |
| <b>FN1157</b> |                                                             |        |          |          |            |        |          |          | 0.980        | 7.065  | 1.114e-2 | 4.655e-2 |                |        |          |          |              |        |          |          |                |        |          |          |                         |     |       |       |    |    |    |   |   |   |   |  |
|               | AAL95353.1   Polypeptide deformylase                        |        |          |          |            |        |          |          |              |        |          |          |                |        |          |          |              |        |          |          |                |        |          |          |                         |     |       |       |    |    |    |   |   |   |   |  |
| <b>FN1159</b> | 0.507                                                       | 13.609 | 4.817e-2 | 8.513e-2 | 0.801      | 14.088 | 3.377e-4 | 7.494e-4 | -0.035       | 12.863 | 1.354e-1 | 7.929e-1 | -0.542         | 13.574 | 4.806e-2 | 7.492e-2 | 0.294        | 14.595 | 1.371e-1 | 1.56e-1  | -0.836         | 14.052 | 1.714e-4 | 1.773e-4 |                         |     |       |       |    |    |    |   |   |   |   |  |
|               | AAL95355.1   Fructose-1,6-bisphosphatase                    |        |          |          |            |        |          |          |              |        |          |          |                |        |          |          |              |        |          |          |                |        |          |          |                         |     |       |       |    |    |    |   |   |   |   |  |
| <b>FN1160</b> | -1.457                                                      | 4.627  |          |          | -0.124     | 6.144  | 7.389e-2 | 4.24e-1  | 0.227        | 6.107  | 1.842e-2 | 8.233e-2 | 1.684          | 4.854  |          |          | 1.333        | 4.687  |          |          | 0.352          | 6.372  | 1.012e-2 | 3.554e-2 |                         |     |       |       |    |    |    |   |   |   |   |  |
|               | AAL95356.1   SWF/SNF family helicase                        |        |          |          |            |        |          |          |              |        |          |          |                |        |          |          |              |        |          |          |                |        |          |          |                         |     |       |       |    |    |    |   |   |   |   |  |
| <b>FN1161</b> | -2.264                                                      | 5.434  |          |          | -0.986     | 6.896  | 3.008e-3 | 1.126e-2 | -1.389       | 6.104  |          |          | 0.874          | 4.044  |          |          | 1.278        | 4.632  |          |          | -0.403         | 5.507  |          |          |                         |     |       |       |    |    |    |   |   |   |   |  |
|               | AAL95357.1   Glutamate racemase                             |        |          |          |            |        |          |          |              |        |          |          |                |        |          |          |              |        |          |          |                |        |          |          |                         |     |       |       |    |    |    |   |   |   |   |  |
| <b>FN1162</b> | 1.679                                                       | 7.106  |          |          | 0.121      | 5.732  |          |          |              |        |          |          |                |        |          |          | -1.558       | 7.411  |          |          |                |        |          |          |                         |     |       |       |    |    |    |   |   |   |   |  |
|               | AAL95358.1   Hydroxyacylglutathione hydrolase               |        |          |          |            |        |          |          |              |        |          |          |                |        |          |          |              |        |          |          |                |        |          |          |                         |     |       |       |    |    |    |   |   |   |   |  |
| <b>FN1163</b> | 0.016                                                       | 11.964 | 3.015e-1 | 9.621e-1 | -0.499     | 11.635 | 1.334e-2 | 6.521e-2 | 0.429        | 12.174 | 1.094e-3 | 2.695e-3 | 0.413          | 12.393 | 9.506e-2 | 2.023e-1 | -0.514       | 11.650 | 1.768e-1 | 2.547e-1 | 0.927          | 12.063 | 3.219e-3 | 8.388e-3 |                         |     |       |       |    |    |    |   |   |   |   |  |
|               | AAL95359.1   Thioredoxin reductase                          |        |          |          |            |        |          |          |              |        |          |          |                |        |          |          |              |        |          |          |                |        |          |          |                         |     |       |       |    |    |    |   |   |   |   |  |
| <b>FN1164</b> | -1.042                                                      | 7.626  | 4.611e-5 | 4.151e-6 | -0.764     | 8.088  | 5.827e-4 | 1.496e-3 | -1.552       | 6.911  |          |          | -0.511         | 6.073  |          |          | 0.278        | 7.046  | 1.106e-1 | 1.026e-1 | -0.788         | 6.536  |          |          |                         |     |       |       |    |    |    |   |   |   |   |  |
|               | AAL95360.1   Glucokinase                                    |        |          |          |            |        |          |          |              |        |          |          |                |        |          |          |              |        |          |          |                |        |          |          |                         |     |       |       |    |    |    |   |   |   |   |  |
| <b>FN1165</b> | -0.474                                                      | 23.494 | 3.39e-4  | 8.379e-5 | 0.138      | 24.291 | 6.285e-2 | 3.564e-1 | 0.707        | 24.471 | 1.037e-4 | 1.155e-4 | 1.181          | 24.201 | 5.659e-5 | 3.271e-6 | 0.612        | 23.817 | 5.094e-2 | 2.352e-2 | 0.568          | 24.997 | 2.725e-3 | 6.819e-3 |                         |     |       |       |    |    |    |   |   |   |   |  |
|               | AAL95361.1   D-galactose-binding protein                    |        |          |          |            |        |          |          |              |        |          |          |                |        |          |          |              |        |          |          |                |        |          |          |                         |     |       |       |    |    |    |   |   |   |   |  |
| <b>FN1166</b> | -0.484                                                      | 15.297 | 6.935e-3 | 7.123e-3 | -0.107     | 15.858 | 4.275e-2 | 2.353e-1 | -0.912       | 14.665 | 6.242e-4 | 1.324e-3 | -0.428         | 14.385 | 5.173e-4 | 9.314e-5 | 0.377        | 15.375 | 1.558e-3 | 7.615e-5 | -0.805         | 14.946 | 1.643e-5 | 6.592e-6 |                         |     |       |       |    |    |    |   |   |   |   |  |
|               | AAL95362.1   Galactoside transport ATP-binding protein mgIA |        |          |          |            |        |          |          |              |        |          |          |                |        |          |          |              |        |          |          |                |        |          |          |                         |     |       |       |    |    |    |   |   |   |   |  |

Show detected proteins only  
 Show all proteins  
 Filter by category:

Proteins found: 1424

Enter (or paste) list of ORFs

Find ORFs

Test Cutoff

q-Value p-Value

.005

Dot Plots

| Signif | Direction | Applies To   |
|--------|-----------|--------------|
| yes    | +         | ratios, bars |
| no     | n/a       | bars         |
| yes    | -         | ratios, bars |
| yes    | +         | p-, q-Values |
| yes    | -         | p-, q-Values |

FnPg vs Fn — █ — FnSg vs Fn  
 FnPgSg vs Fn — █ — FnPgSg vs FnPg  
 FnSg vs FnPg — █ — FnPgSg vs FnSg

Fn Summary Table

FnPg vs Fn

FnSg vs Fn

FnPgSg vs Fn

FnPgSg vs FnPg

FnSg vs FnPg

FnPgSg vs FnSg

Fn Coverage

| ORF           | FnPg vs Fn                                                      |        |          |          | FnSg vs Fn |        |          |          | FnPgSg vs Fn |        |          |          | FnPgSg vs FnPg |        |          |          | FnSg vs FnPg |        |          |          | FnPgSg vs FnSg |        |          |          | Log <sub>2</sub> Ratios |       |          |          |    |    |    |   |   |   |   |  |
|---------------|-----------------------------------------------------------------|--------|----------|----------|------------|--------|----------|----------|--------------|--------|----------|----------|----------------|--------|----------|----------|--------------|--------|----------|----------|----------------|--------|----------|----------|-------------------------|-------|----------|----------|----|----|----|---|---|---|---|--|
|               | Ratio                                                           | Sum    | q-Val    | p-Val    | Ratio      | Sum    | q-Val    | p-Val    | Ratio        | Sum    | q-Val    | p-Val    | Ratio          | Sum    | q-Val    | p-Val    | Ratio        | Sum    | q-Val    | p-Val    | Ratio          | Sum    | q-Val    | p-Val    | Ratio                   | Sum   | q-Val    | p-Val    | -6 | -4 | -2 | 0 | 2 | 4 | 6 |  |
| <b>FN1167</b> |                                                                 |        |          |          | -1.960     | 9.059  | 1.49e-2  | 7.405e-2 | -0.858       | 9.773  | 4.028e-2 | 2.029e-1 |                |        |          |          |              |        |          |          |                |        |          |          | 1.102                   | 8.201 | 4.179e-3 | 1.182e-2 |    |    |    |   |   |   |   |  |
|               | AAL95363.1   Galactoside transport system permease protein mgIC |        |          |          |            |        |          |          |              |        |          |          |                |        |          |          |              |        |          |          |                |        |          |          |                         |       |          |          |    |    |    |   |   |   |   |  |
| <b>FN1169</b> | -0.356                                                          | 16.815 | 4.448e-2 | 7.633e-2 | -0.078     | 17.277 | 1.066e-1 | 6.339e-1 | -0.641       | 16.326 | 5.206e-5 | 4.348e-5 | -0.285         | 16.174 | 9.312e-2 | 1.958e-1 | 0.278        | 16.921 | 1.73e-1  | 2.456e-1 | -0.563         | 16.637 | 1.318e-2 | 4.862e-2 |                         |       |          |          |    |    |    |   |   |   |   |  |
|               | AAL95365.1   L-lactate dehydrogenase                            |        |          |          |            |        |          |          |              |        |          |          |                |        |          |          |              |        |          |          |                |        |          |          |                         |       |          |          |    |    |    |   |   |   |   |  |
| <b>FN1170</b> | 0.506                                                           | 25.229 | 7.054e-2 | 1.441e-1 | 0.364      | 25.271 | 8.773e-6 | 4.768e-6 | -0.301       | 24.218 | 6.627e-4 | 1.43e-3  | -0.807         | 24.928 | 4.348e-2 | 6.47e-2  | -0.142       | 25.777 | 3.064e-1 | 5.768e-1 | -0.665         | 24.970 | 2.019e-5 | 9.477e-6 |                         |       |          |          |    |    |    |   |   |   |   |  |
|               | AAL95366.1   Pyruvate-flavodoxin oxidoreductase                 |        |          |          |            |        |          |          |              |        |          |          |                |        |          |          |              |        |          |          |                |        |          |          |                         |       |          |          |    |    |    |   |   |   |   |  |
| <b>FN1171</b> | 0.209                                                           | 19.881 | 1.436e-1 | 3.589e-1 | -0.013     | 19.843 | 1.435e-1 | 8.903e-1 | -0.180       | 19.288 | 7.07e-3  | 2.748e-2 | -0.388         | 19.701 | 7.863e-2 | 1.521e-1 | -0.222       | 20.052 | 2.133e-1 | 3.435e-1 | -0.167         | 19.664 | 3.173e-2 | 1.328e-1 |                         |       |          |          |    |    |    |   |   |   |   |  |
|               | AAL95367.1   Acetate kinase                                     |        |          |          |            |        |          |          |              |        |          |          |                |        |          |          |              |        |          |          |                |        |          |          |                         |       |          |          |    |    |    |   |   |   |   |  |
| <b>FN1172</b> | -0.630                                                          | 18.578 | 1.192e-4 | 1.8e-5   | -0.600     | 18.793 | 4.171e-5 | 4.682e-5 | -0.131       | 18.873 | 1.678e-2 | 7.399e-2 | 0.499          | 18.447 | 2.845e-3 | 1.133e-3 | 0.030        | 18.163 | 3.338e-1 | 6.54e-1  | 0.469          | 18.661 | 7.401e-4 | 1.293e-3 |                         |       |          |          |    |    |    |   |   |   |   |  |
|               | AAL95368.1   Phosphate acetyltransferase                        |        |          |          |            |        |          |          |              |        |          |          |                |        |          |          |              |        |          |          |                |        |          |          |                         |       |          |          |    |    |    |   |   |   |   |  |
| <b>FN1176</b> |                                                                 |        |          |          |            |        |          |          |              |        |          |          |                |        |          |          |              |        |          |          |                |        |          |          |                         |       |          |          |    |    |    |   |   |   |   |  |
|               | AAL95372.1   Hypothetical cytosolic protein                     |        |          |          |            |        |          |          |              |        |          |          |                |        |          |          |              |        |          |          |                |        |          |          |                         |       |          |          |    |    |    |   |   |   |   |  |
| <b>FN1179</b> | 1.870                                                           | 6.653  |          |          | 0.101      | 5.069  |          |          |              |        |          |          |                |        |          |          | -1.769       | 6.939  |          |          |                |        |          |          |                         |       |          |          |    |    |    |   |   |   |   |  |
|               | AAL95375.1   ATP-dependent RNA helicase                         |        |          |          |            |        |          |          |              |        |          |          |                |        |          |          |              |        |          |          |                |        |          |          |                         |       |          |          |    |    |    |   |   |   |   |  |
| <b>FN1180</b> | 0.361                                                           | 7.191  |          |          | -0.700     | 6.314  |          |          |              |        |          |          |                |        |          |          | -1.061       | 6.676  |          |          |                |        |          |          |                         |       |          |          |    |    |    |   |   |   |   |  |
|               | AAL95376.1   Hypothetical protein                               |        |          |          |            |        |          |          |              |        |          |          |                |        |          |          |              |        |          |          |                |        |          |          |                         |       |          |          |    |    |    |   |   |   |   |  |
| <b>FN1181</b> | 1.353                                                           | 15.098 | 1.258e-1 | 3.03e-1  | -0.991     | 12.938 | 1.55e-4  | 2.816e-4 | -0.603       | 12.939 | 1.358e-3 | 3.661e-3 | -1.956         | 14.495 | 1.022e-1 | 2.275e-1 | -2.344       | 14.291 | 1.54e-1  | 2.001e-1 | 0.388          | 12.335 | 1.265e-2 | 4.632e-2 |                         |       |          |          |    |    |    |   |   |   |   |  |
|               | AAL95377.1   unknown                                            |        |          |          |            |        |          |          |              |        |          |          |                |        |          |          |              |        |          |          |                |        |          |          |                         |       |          |          |    |    |    |   |   |   |   |  |
| <b>FN1182</b> | 0.348                                                           | 7.204  |          |          | -0.935     | 6.105  |          |          |              |        |          |          |                |        |          |          | -1.284       | 6.453  |          |          |                |        |          |          |                         |       |          |          |    |    |    |   |   |   |   |  |
|               | AAL95378.1   Hypothetical protein                               |        |          |          |            |        |          |          |              |        |          |          |                |        |          |          |              |        |          |          |                |        |          |          |                         |       |          |          |    |    |    |   |   |   |   |  |
| <b>FN1183</b> | 1.050                                                           | 6.875  | 1.941e-2 | 2.608e-2 | 0.873      | 6.883  | 1.428e-2 | 7.06e-2  | -0.372       | 5.250  | 3.84e-2  | 1.919e-1 | -1.422         | 6.503  | 1.305e-2 | 1.13e-2  | -0.176       | 7.933  | 3.097e-1 | 5.857e-1 | -1.245         | 6.511  | 9.701e-3 | 3.377e-2 |                         |       |          |          |    |    |    |   |   |   |   |  |
|               | AAL95379.1   Hypothetical cytosolic protein                     |        |          |          |            |        |          |          |              |        |          |          |                |        |          |          |              |        |          |          |                |        |          |          |                         |       |          |          |    |    |    |   |   |   |   |  |
| <b>FN1184</b> |                                                                 |        |          |          |            |        |          |          |              |        |          |          |                |        |          |          |              |        |          |          |                |        |          |          |                         |       |          |          |    |    |    |   |   |   |   |  |
|               | AAL95380.1   Hypothetical protein                               |        |          |          |            |        |          |          |              |        |          |          |                |        |          |          |              |        |          |          |                |        |          |          |                         |       |          |          |    |    |    |   |   |   |   |  |
| <b>FN1185</b> | 0.578                                                           | 10.599 | 1.313e-1 | 3.2e-1   | -0.111     | 10.095 | 5.219e-2 | 2.924e-1 | -0.022       | 9.796  | 1.28e-1  | 7.429e-1 | -0.600         | 10.578 | 1.248e-1 | 3.079e-1 | -0.689       | 10.673 | 1.81e-1  | 2.649e-1 | 0.090          | 10.073 | 7.936e-2 | 3.729e-1 |                         |       |          |          |    |    |    |   |   |   |   |  |
|               | AAL95381.1   SIR2 family protein                                |        |          |          |            |        |          |          |              |        |          |          |                |        |          |          |              |        |          |          |                |        |          |          |                         |       |          |          |    |    |    |   |   |   |   |  |
| <b>FN1186</b> | 4.221                                                           | 12.526 | 4.992e-2 | 8.934e-2 | 4.461      | 12.950 | 1.95e-5  | 1.59e-5  | 0.571        | 8.672  | 1.738e-2 | 7.7e-2   | -3.651         | 13.097 | 5.602e-2 | 9.491e-2 | 0.240        | 17.171 | 3.387e-1 | 6.688e-1 | -3.890         | 13.521 | 1.311e-5 | 4.501e-6 |                         |       |          |          |    |    |    |   |   |   |   |  |
|               | AAL95382.1   Amidohydrolase                                     |        |          |          |            |        |          |          |              |        |          |          |                |        |          |          |              |        |          |          |                |        |          |          |                         |       |          |          |    |    |    |   |   |   |   |  |
| <b>FN1187</b> |                                                                 |        |          |          |            |        |          |          |              |        |          |          | -0.476         | 10.886 | 1.992e-1 | 5.927e-1 | 0.650        | 12.196 | 2.121e-1 | 3.408e-1 | -1.126         | 11.721 | 1.251e-2 | 4.572e-2 |                         |       |          |          |    |    |    |   |   |   |   |  |
|               | AAL95383.1   Amino acid-binding protein                         |        |          |          |            |        |          |          |              |        |          |          |                |        |          |          |              |        |          |          |                |        |          |          |                         |       |          |          |    |    |    |   |   |   |   |  |
| <b>FN1188</b> | -0.936                                                          | 11.845 | 5.604e-2 | 1.05e-1  | 0.226      | 13.192 | 1.158e-2 | 5.527e-2 | -0.774       | 11.803 | 1.582e-3 | 4.52e-3  | 0.162          | 11.071 | 2.475e-1 | 7.886e-1 | 1.162        | 12.256 | 7.563e-2 | 4.809e-2 | -1.000         | 12.418 | 2.38e-4  | 2.799e-4 |                         |       |          |          |    |    |    |   |   |   |   |  |
|               | AAL95384.1   Hypothetical protein                               |        |          |          |            |        |          |          |              |        |          |          |                |        |          |          |              |        |          |          |                |        |          |          |                         |       |          |          |    |    |    |   |   |   |   |  |
| <b>FN1189</b> | -0.482                                                          | 12.482 | 1.891e-3 | 1.186e-3 | -0.599     | 12.549 | 5.336e-3 | 2.229e-2 | -0.844       | 11.917 | 9.974e-5 | 1.086e-4 | -0.362         | 11.639 | 4.426e-4 | 7.239e-5 | -0.118       | 12.067 | 2.978e-1 | 5.538e-1 | -0.244         | 11.706 | 6.726e-2 | 3.104e-1 |                         |       |          |          |    |    |    |   |   |   |   |  |
|               | AAL95385.1   Hypothetical protein                               |        |          |          |            |        |          |          |              |        |          |          |                |        |          |          |              |        |          |          |                |        |          |          |                         |       |          |          |    |    |    |   |   |   |   |  |

Show detected proteins only  
 Show all proteins  
 Filter by category:

Proteins found: 1424

Enter (or paste) list of ORFs

Find ORFs

Test Cutoff

q-Value .005

p-Value

Dot Plots

| Signif | Direction | Applies To   |
|--------|-----------|--------------|
| yes    | +         | ratios, bars |
| no     | n/a       | bars         |
| yes    | -         | ratios, bars |
| yes    | +         | p-, q-Values |
| yes    | -         | p-, q-Values |

FnPg vs Fn — █ — FnSg vs Fn  
 FnPgSg vs Fn — █ — FnPgSg vs FnPg  
 FnSg vs FnPg — █ — FnPgSg vs FnSg

Fn Summary Table FnPg vs Fn FnSg vs Fn FnPgSg vs Fn FnPgSg vs FnPg FnSg vs FnPg FnPgSg vs FnSg Fn Coverage

| ORF           | FnPg vs Fn                                        |        |          |          | FnSg vs Fn |        |          |          | FnPgSg vs Fn |        |          |          | FnPgSg vs FnPg |        |          |          | FnSg vs FnPg |        |          |          | FnPgSg vs FnSg |        |          |          | Log <sub>2</sub> Ratios |     |       |       |    |    |    |   |   |   |   |  |
|---------------|---------------------------------------------------|--------|----------|----------|------------|--------|----------|----------|--------------|--------|----------|----------|----------------|--------|----------|----------|--------------|--------|----------|----------|----------------|--------|----------|----------|-------------------------|-----|-------|-------|----|----|----|---|---|---|---|--|
|               | Ratio                                             | Sum    | q-Val    | p-Val    | Ratio      | Sum    | q-Val    | p-Val    | Ratio        | Sum    | q-Val    | p-Val    | Ratio          | Sum    | q-Val    | p-Val    | Ratio        | Sum    | q-Val    | p-Val    | Ratio          | Sum    | q-Val    | p-Val    | Ratio                   | Sum | q-Val | p-Val | -6 | -4 | -2 | 0 | 2 | 4 | 6 |  |
| <b>FN1190</b> | -0.937                                            | 13.526 | 2.184e-5 | 1.409e-6 | 0.102      | 14.748 | 2.297e-3 | 8.066e-3 | -0.773       | 13.486 | 2.781e-5 | 1.491e-5 | 0.164          | 12.753 | 4.181e-2 | 6.12e-2  | 1.038        | 13.812 | 8.211e-5 | 4.721e-7 | -0.874         | 13.976 | 1.307e-5 | 4.48e-6  |                         |     |       |       |    |    |    |   |   |   |   |  |
|               | AAL95386.1   Probable cadmium-transporting ATPase |        |          |          |            |        |          |          |              |        |          |          |                |        |          |          |              |        |          |          |                |        |          |          |                         |     |       |       |    |    |    |   |   |   |   |  |
| <b>FN1191</b> | 0.044                                             | 10.940 |          |          | 1.230      | 12.311 | 5.734e-3 | 2.423e-2 | -1.310       | 9.382  | 1.205e-4 | 1.418e-4 | -1.354         | 9.630  |          |          | 1.187        | 12.355 |          |          | -2.540         | 11.001 | 3.237e-3 | 8.446e-3 |                         |     |       |       |    |    |    |   |   |   |   |  |
|               | AAL95387.1   unknown                              |        |          |          |            |        |          |          |              |        |          |          |                |        |          |          |              |        |          |          |                |        |          |          |                         |     |       |       |    |    |    |   |   |   |   |  |
| <b>FN1192</b> | 0.086                                             | 16.985 | 2.075e-1 | 5.839e-1 | 0.877      | 17.961 | 2.91e-3  | 1.08e-2  | 0.899        | 17.594 | 2.076e-4 | 3.074e-4 | 0.813          | 17.884 | 2.569e-3 | 9.785e-4 | 0.791        | 18.046 | 2.599e-2 | 7.173e-3 | 0.022          | 18.859 | 1.68e-1  | 8.733e-1 |                         |     |       |       |    |    |    |   |   |   |   |  |
|               | AAL95388.1   unknown                              |        |          |          |            |        |          |          |              |        |          |          |                |        |          |          |              |        |          |          |                |        |          |          |                         |     |       |       |    |    |    |   |   |   |   |  |
| <b>FN1198</b> | 0.382                                             | 9.619  | 6.09e-2  | 1.185e-1 | 1.280      | 10.701 | 1.881e-5 | 1.503e-5 | -0.032       | 9.001  | 8.343e-2 | 4.585e-1 | -0.414         | 9.587  | 5.934e-2 | 1.031e-1 | 0.898        | 11.084 | 1.113e-2 | 2.001e-3 | -1.312         | 10.670 | 5.405e-5 | 3.859e-5 |                         |     |       |       |    |    |    |   |   |   |   |  |
|               | AAL95394.1   Transporter                          |        |          |          |            |        |          |          |              |        |          |          |                |        |          |          |              |        |          |          |                |        |          |          |                         |     |       |       |    |    |    |   |   |   |   |  |
| <b>FN1200</b> |                                                   |        |          |          |            |        |          |          |              |        |          |          | -5.133         | 12.533 |          |          | -0.742       | 17.108 |          |          | -4.391         | 11.975 | 5.214e-4 | 7.921e-4 |                         |     |       |       |    |    |    |   |   |   |   |  |
|               | AAL95396.1   Hypothetical protein                 |        |          |          |            |        |          |          |              |        |          |          |                |        |          |          |              |        |          |          |                |        |          |          |                         |     |       |       |    |    |    |   |   |   |   |  |
| <b>FN1201</b> |                                                   |        |          |          |            |        |          |          |              |        |          |          |                |        |          |          |              |        |          |          |                |        |          |          |                         |     |       |       |    |    |    |   |   |   |   |  |
|               | AAL95397.1   unknown                              |        |          |          |            |        |          |          |              |        |          |          |                |        |          |          |              |        |          |          |                |        |          |          |                         |     |       |       |    |    |    |   |   |   |   |  |
| <b>FN1202</b> | 1.492                                             | 8.053  |          |          | 1.295      | 8.041  |          |          | 0.633        | 6.991  |          |          | -0.858         | 8.687  | 6.926e-3 | 4.136e-3 | -0.197       | 9.533  | 2.819e-1 | 5.125e-1 | -0.662         | 8.674  | 3.534e-2 | 1.502e-1 |                         |     |       |       |    |    |    |   |   |   |   |  |
|               | AAL95398.1   NH(3)-dependent NAD(+) synthetase    |        |          |          |            |        |          |          |              |        |          |          |                |        |          |          |              |        |          |          |                |        |          |          |                         |     |       |       |    |    |    |   |   |   |   |  |
| <b>FN1203</b> | -0.717                                            | 6.710  |          |          | -0.412     | 7.199  |          |          |              |        |          |          |                |        |          |          | 0.305        | 6.482  | 2.465e-1 | 4.265e-1 |                |        |          |          |                         |     |       |       |    |    |    |   |   |   |   |  |
|               | AAL95399.1   GTP-binding protein                  |        |          |          |            |        |          |          |              |        |          |          |                |        |          |          |              |        |          |          |                |        |          |          |                         |     |       |       |    |    |    |   |   |   |   |  |
| <b>FN1204</b> | 0.388                                             | 7.090  | 7.563e-2 | 1.577e-1 | 0.512      | 7.398  | 1.83e-2  | 9.29e-2  |              |        |          |          |                |        |          |          | 0.124        | 7.786  | 2.531e-1 | 4.425e-1 |                |        |          |          |                         |     |       |       |    |    |    |   |   |   |   |  |
|               | AAL95400.1   Methyltransferase                    |        |          |          |            |        |          |          |              |        |          |          |                |        |          |          |              |        |          |          |                |        |          |          |                         |     |       |       |    |    |    |   |   |   |   |  |
| <b>FN1205</b> | -0.683                                            | 12.230 | 6.338e-2 | 1.254e-1 | -0.761     | 12.337 | 9.387e-3 | 4.337e-2 | -0.383       | 12.326 | 4.428e-3 | 1.578e-2 | 0.300          | 11.847 | 1.744e-1 | 4.912e-1 | -0.078       | 11.654 | 4.044e-1 | 8.864e-1 | 0.378          | 11.953 | 5.801e-2 | 2.633e-1 |                         |     |       |       |    |    |    |   |   |   |   |  |
|               | AAL95401.1   Protease                             |        |          |          |            |        |          |          |              |        |          |          |                |        |          |          |              |        |          |          |                |        |          |          |                         |     |       |       |    |    |    |   |   |   |   |  |
| <b>FN1206</b> |                                                   |        |          |          |            |        |          |          |              |        |          |          |                |        |          |          |              |        |          |          |                |        |          |          |                         |     |       |       |    |    |    |   |   |   |   |  |
|               | AAL95402.1   Hemolysin                            |        |          |          |            |        |          |          |              |        |          |          |                |        |          |          |              |        |          |          |                |        |          |          |                         |     |       |       |    |    |    |   |   |   |   |  |
| <b>FN1208</b> | -0.395                                            | 6.435  | 3.627e-2 | 5.794e-2 | 0.580      | 7.594  |          |          | -0.991       | 5.635  |          |          | -0.596         | 5.444  |          |          | 0.975        | 7.199  |          |          | -1.571         | 6.604  |          |          |                         |     |       |       |    |    |    |   |   |   |   |  |
|               | AAL95404.1   1-deoxyxylulose-5-phosphate synthase |        |          |          |            |        |          |          |              |        |          |          |                |        |          |          |              |        |          |          |                |        |          |          |                         |     |       |       |    |    |    |   |   |   |   |  |
| <b>FN1209</b> | -2.359                                            | 10.173 |          |          | -1.872     | 10.844 | 2.67e-3  | 9.698e-3 | -0.479       | 11.848 | 3.301e-2 | 1.609e-1 | 1.880          | 9.694  |          |          | 0.487        | 8.485  |          |          | 1.393          | 10.365 | 1.062e-2 | 3.767e-2 |                         |     |       |       |    |    |    |   |   |   |   |  |
|               | AAL95405.1   Hypothetical RNA binding protein     |        |          |          |            |        |          |          |              |        |          |          |                |        |          |          |              |        |          |          |                |        |          |          |                         |     |       |       |    |    |    |   |   |   |   |  |
| <b>FN1210</b> | -1.499                                            | 11.414 | 1.487e-2 | 1.838e-2 | -1.032     | 12.066 | 5.966e-3 | 2.538e-2 | -1.246       | 11.463 | 5.322e-3 | 1.97e-2  | 0.253          | 10.168 | 1.046e-1 | 2.361e-1 | 0.467        | 10.567 | 1.481e-1 | 1.847e-1 | -0.214         | 10.820 | 1.025e-1 | 4.939e-1 |                         |     |       |       |    |    |    |   |   |   |   |  |
|               | AAL95406.1   Metal dependent hydrolase            |        |          |          |            |        |          |          |              |        |          |          |                |        |          |          |              |        |          |          |                |        |          |          |                         |     |       |       |    |    |    |   |   |   |   |  |
| <b>FN1211</b> | -1.699                                            | 7.067  | 5.425e-4 | 1.742e-4 | -0.699     | 8.252  | 3.479e-3 | 1.353e-2 | -0.425       | 8.138  | 4.291e-2 | 2.179e-1 | 1.275          | 6.642  | 4.827e-2 | 7.542e-2 | 1.001        | 6.553  | 6.418e-2 | 3.53e-2  | 0.274          | 7.827  | 1.073e-1 | 5.2e-1   |                         |     |       |       |    |    |    |   |   |   |   |  |
|               | AAL95407.1   Cell division protein ftsI           |        |          |          |            |        |          |          |              |        |          |          |                |        |          |          |              |        |          |          |                |        |          |          |                         |     |       |       |    |    |    |   |   |   |   |  |
| <b>FN1213</b> | -1.264                                            | 11.300 | 7.2e-3   | 7.517e-3 | -0.421     | 12.327 | 2.328e-3 | 8.199e-3 | -0.785       | 11.575 | 2.858e-4 | 4.737e-4 | 0.479          | 10.515 | 1.034e-1 | 2.319e-1 | 0.842        | 11.063 | 8.008e-2 | 5.416e-2 | -0.364         | 11.542 | 5.795e-3 | 1.813e-2 |                         |     |       |       |    |    |    |   |   |   |   |  |
|               | AAL95409.1   Hypothetical protein                 |        |          |          |            |        |          |          |              |        |          |          |                |        |          |          |              |        |          |          |                |        |          |          |                         |     |       |       |    |    |    |   |   |   |   |  |
| <b>FN1214</b> |                                                   |        |          |          |            |        |          |          |              |        |          |          |                |        |          |          |              |        |          |          |                |        |          |          |                         |     |       |       |    |    |    |   |   |   |   |  |
|               | AAL95410.1   Fe-S oxidoreductase                  |        |          |          |            |        |          |          |              |        |          |          |                |        |          |          |              |        |          |          |                |        |          |          |                         |     |       |       |    |    |    |   |   |   |   |  |

Show detected proteins only

Show all proteins

Filter by category:

GO: amino acid transport

Proteins found: 1424

Enter (or paste) list of ORFs

Find ORFs

Test Cutoff

q-Value .005

p-Value

Dot Plots

Dot Plots

| Signif | Direction | Applies To   |
|--------|-----------|--------------|
| yes    | +         | ratios, bars |
| no     | n/a       | bars         |
| yes    | -         | ratios, bars |
| yes    | +         | p-, q-Values |
| yes    | -         | p-, q-Values |

FnPg vs Fn — █ — FnSg vs Fn

FnPgSg vs Fn — █ — FnPgSg vs FnPg

FnSg vs FnPg — █ — FnPgSg vs FnSg



Fn Summary Table FnPg vs Fn FnSg vs Fn FnPgSg vs Fn FnPgSg vs FnPg FnSg vs FnPg FnPgSg vs FnSg Fn Coverage

| ORF           | FnPg vs Fn                                                                      |        |          |          | FnSg vs Fn |        |          |          | FnPgSg vs Fn |        |          |          | FnPgSg vs FnPg |        |          |          | FnSg vs FnPg |        |          |          | FnPgSg vs FnSg |        |          |          | Log <sub>2</sub> Ratios |     |       |       |    |    |    |   |   |   |   |  |
|---------------|---------------------------------------------------------------------------------|--------|----------|----------|------------|--------|----------|----------|--------------|--------|----------|----------|----------------|--------|----------|----------|--------------|--------|----------|----------|----------------|--------|----------|----------|-------------------------|-----|-------|-------|----|----|----|---|---|---|---|--|
|               | Ratio                                                                           | Sum    | q-Val    | p-Val    | Ratio      | Sum    | q-Val    | p-Val    | Ratio        | Sum    | q-Val    | p-Val    | Ratio          | Sum    | q-Val    | p-Val    | Ratio        | Sum    | q-Val    | p-Val    | Ratio          | Sum    | q-Val    | p-Val    | Ratio                   | Sum | q-Val | p-Val | -6 | -4 | -2 | 0 | 2 | 4 | 6 |  |
| <b>FN1216</b> | -1.368                                                                          | 8.377  | 1.593e-2 | 2.007e-2 | -0.881     | 9.049  | 1.107e-2 | 5.249e-2 | -2.043       | 7.499  | 2.413e-3 | 7.568e-3 | -0.675         | 6.335  | 8.412e-2 | 1.678e-1 | 0.487        | 7.681  | 7.205e-2 | 4.373e-2 | -1.162         | 7.006  | 8.666e-3 | 2.956e-2 |                         |     |       |       |    |    |    |   |   |   |   |  |
|               | AAL95412.1   RRF2 family protein                                                |        |          |          |            |        |          |          |              |        |          |          |                |        |          |          |              |        |          |          |                |        |          |          |                         |     |       |       |    |    |    |   |   |   |   |  |
| <b>FN1217</b> | -1.747                                                                          | 7.361  |          |          | -0.122     | 9.171  | 9.118e-2 | 5.332e-1 | -2.308       | 6.597  | 1.333e-3 | 3.563e-3 | -0.561         | 5.054  |          |          | 1.625        | 7.424  |          |          | -2.186         | 6.863  | 7.813e-4 | 1.393e-3 |                         |     |       |       |    |    |    |   |   |   |   |  |
|               | AAL95413.1   Holliday junction DNA helicase ruvB                                |        |          |          |            |        |          |          |              |        |          |          |                |        |          |          |              |        |          |          |                |        |          |          |                         |     |       |       |    |    |    |   |   |   |   |  |
| <b>FN1218</b> |                                                                                 |        |          |          |            |        |          |          |              |        |          |          |                |        |          |          | 0.374        | 7.959  |          |          |                |        |          |          |                         |     |       |       |    |    |    |   |   |   |   |  |
|               | AAL95414.1   unknown                                                            |        |          |          |            |        |          |          |              |        |          |          |                |        |          |          |              |        |          |          |                |        |          |          |                         |     |       |       |    |    |    |   |   |   |   |  |
| <b>FN1219</b> | 0.350                                                                           | 7.953  | 5.396e-2 | 9.952e-2 | 0.075      | 7.863  | 9.847e-2 | 5.804e-1 | 0.422        | 7.821  | 3.929e-2 | 1.971e-1 | 0.072          | 8.375  | 2.487e-1 | 7.936e-1 | -0.275       | 8.213  | 1.35e-1  | 1.511e-1 | 0.347          | 8.285  | 5.689e-2 | 2.576e-1 |                         |     |       |       |    |    |    |   |   |   |   |  |
|               | AAL95415.1   Hypothetical protein                                               |        |          |          |            |        |          |          |              |        |          |          |                |        |          |          |              |        |          |          |                |        |          |          |                         |     |       |       |    |    |    |   |   |   |   |  |
| <b>FN1220</b> | -0.155                                                                          | 15.303 | 5.815e-2 | 1.107e-1 | 0.134      | 15.776 | 9.04e-2  | 5.281e-1 | 0.018        | 15.272 | 1.344e-1 | 7.861e-1 | 0.173          | 15.321 | 5.507e-2 | 9.256e-2 | 0.289        | 15.621 | 1.709e-1 | 2.404e-1 | -0.116         | 15.794 | 1.186e-1 | 5.823e-1 |                         |     |       |       |    |    |    |   |   |   |   |  |
|               | AAL95416.1   Cysteine synthase                                                  |        |          |          |            |        |          |          |              |        |          |          |                |        |          |          |              |        |          |          |                |        |          |          |                         |     |       |       |    |    |    |   |   |   |   |  |
| <b>FN1221</b> | 0.131                                                                           | 8.428  | 2.718e-1 | 8.321e-1 | 0.628      | 9.110  | 1.698e-2 | 8.559e-2 | 0.092        | 8.185  | 8.491e-2 | 4.678e-1 | -0.040         | 8.520  | 2.832e-1 | 9.47e-1  | 0.497        | 9.241  | 2.284e-1 | 3.808e-1 | -0.537         | 9.201  | 2.795e-2 | 1.15e-1  |                         |     |       |       |    |    |    |   |   |   |   |  |
|               | AAL95417.1   Hypothetical protein                                               |        |          |          |            |        |          |          |              |        |          |          |                |        |          |          |              |        |          |          |                |        |          |          |                         |     |       |       |    |    |    |   |   |   |   |  |
| <b>FN1222</b> | -1.403                                                                          | 8.987  | 3.455e-4 | 8.614e-5 | -2.965     | 7.609  |          |          | -1.412       | 8.774  | 5.603e-4 | 1.153e-3 | -0.009         | 7.575  | 2.889e-1 | 9.741e-1 | -1.562       | 6.206  |          |          | 1.553          | 6.197  |          |          |                         |     |       |       |    |    |    |   |   |   |   |  |
|               | AAL95418.1   Hypothetical protein                                               |        |          |          |            |        |          |          |              |        |          |          |                |        |          |          |              |        |          |          |                |        |          |          |                         |     |       |       |    |    |    |   |   |   |   |  |
| <b>FN1223</b> | 0.428                                                                           | 12.381 | 5.721e-2 | 1.081e-1 | -1.197     | 10.940 | 1.036e-5 | 6.173e-6 | 0.552        | 12.301 | 1.365e-4 | 1.694e-4 | 0.124          | 12.932 | 1.753e-1 | 4.947e-1 | -1.625       | 11.368 | 2.843e-2 | 8.322e-3 | 1.749          | 11.492 | 7.912e-6 | 1.933e-6 |                         |     |       |       |    |    |    |   |   |   |   |  |
|               | AAL95419.1   Oxygen-insensitive NAD(P)H nitroreductase                          |        |          |          |            |        |          |          |              |        |          |          |                |        |          |          |              |        |          |          |                |        |          |          |                         |     |       |       |    |    |    |   |   |   |   |  |
| <b>FN1224</b> | -0.623                                                                          | 13.846 | 5.546e-2 | 1.034e-1 | -1.022     | 13.632 | 4.285e-4 | 1.006e-3 | -0.646       | 13.620 | 8.024e-4 | 1.807e-3 | -0.022         | 13.201 | 2.847e-1 | 9.542e-1 | -0.398       | 13.009 | 2.364e-1 | 4.016e-1 | 0.376          | 12.987 | 2.757e-2 | 1.133e-1 |                         |     |       |       |    |    |    |   |   |   |   |  |
|               | AAL95420.1   2-dehydro-3-deoxyphosphooctonate aldolase                          |        |          |          |            |        |          |          |              |        |          |          |                |        |          |          |              |        |          |          |                |        |          |          |                         |     |       |       |    |    |    |   |   |   |   |  |
| <b>FN1225</b> | -0.240                                                                          | 13.494 | 1.81e-1  | 4.893e-1 | -0.427     | 13.491 | 1.198e-2 | 5.752e-2 | 0.346        | 13.875 | 9.908e-3 | 4.08e-2  | 0.586          | 13.839 | 5.862e-2 | 1.013e-1 | -0.187       | 13.251 | 3.249e-1 | 6.283e-1 | 0.773          | 13.837 | 6.241e-4 | 1.028e-3 |                         |     |       |       |    |    |    |   |   |   |   |  |
|               | AAL95421.1   UDP-N-acetylmuramoyl-L-alanyl-D-glutamate--meso-lanthionine ligase |        |          |          |            |        |          |          |              |        |          |          |                |        |          |          |              |        |          |          |                |        |          |          |                         |     |       |       |    |    |    |   |   |   |   |  |
| <b>FN1226</b> | -1.125                                                                          | 13.443 | 2.289e-2 | 3.208e-2 | 0.365      | 15.117 | 2.48e-2  | 1.297e-1 | -0.774       | 13.590 | 2.599e-7 | 2.069e-8 | 0.351          | 12.669 | 1.612e-1 | 4.415e-1 | 1.490        | 13.992 | 2.328e-2 | 5.925e-3 | -1.139         | 14.343 | 4.941e-3 | 1.48e-2  |                         |     |       |       |    |    |    |   |   |   |   |  |
|               | AAL95422.1   Uracil-DNA glycosylase                                             |        |          |          |            |        |          |          |              |        |          |          |                |        |          |          |              |        |          |          |                |        |          |          |                         |     |       |       |    |    |    |   |   |   |   |  |
| <b>FN1229</b> |                                                                                 |        |          |          |            |        |          |          |              |        |          |          |                |        |          |          |              |        |          |          |                |        |          |          |                         |     |       |       |    |    |    |   |   |   |   |  |
|               | AAL95425.1   Hypothetical protein                                               |        |          |          |            |        |          |          |              |        |          |          |                |        |          |          |              |        |          |          |                |        |          |          |                         |     |       |       |    |    |    |   |   |   |   |  |
| <b>FN1230</b> |                                                                                 |        |          |          |            |        |          |          | 0.003        | 11.544 | 1.62e-1  | 9.785e-1 |                |        |          |          |              |        |          |          |                |        |          |          |                         |     |       |       |    |    |    |   |   |   |   |  |
|               | AAL95426.1   Hypothetical cytosolic protein                                     |        |          |          |            |        |          |          |              |        |          |          |                |        |          |          |              |        |          |          |                |        |          |          |                         |     |       |       |    |    |    |   |   |   |   |  |
| <b>FN1231</b> | 0.451                                                                           | 18.536 | 1.967e-1 | 5.46e-1  | 0.921      | 19.191 | 1.093e-4 | 1.752e-4 | 0.337        | 18.219 | 1.457e-3 | 4.047e-3 | -0.113         | 18.873 | 2.642e-1 | 8.607e-1 | 0.471        | 19.642 | 2.362e-1 | 4.012e-1 | -0.584         | 19.529 | 3.977e-5 | 2.495e-5 |                         |     |       |       |    |    |    |   |   |   |   |  |
|               | AAL95427.1   Inosine-5'-monophosphate dehydrogenase                             |        |          |          |            |        |          |          |              |        |          |          |                |        |          |          |              |        |          |          |                |        |          |          |                         |     |       |       |    |    |    |   |   |   |   |  |
| <b>FN1233</b> |                                                                                 |        |          |          | 0.340      | 4.830  |          |          |              |        |          |          |                |        |          |          |              |        |          |          |                |        |          |          |                         |     |       |       |    |    |    |   |   |   |   |  |
|               | AAL95429.1   Putative NAD(P)H oxidoreductase                                    |        |          |          |            |        |          |          |              |        |          |          |                |        |          |          |              |        |          |          |                |        |          |          |                         |     |       |       |    |    |    |   |   |   |   |  |
| <b>FN1234</b> |                                                                                 |        |          |          | 0.160      | 8.625  |          |          | -1.190       | 6.887  | 2.012e-5 | 9.116e-6 |                |        |          |          |              |        |          |          | -1.350         | 7.435  |          |          |                         |     |       |       |    |    |    |   |   |   |   |  |
|               | AAL95430.1   Hypothetical protein                                               |        |          |          |            |        |          |          |              |        |          |          |                |        |          |          |              |        |          |          |                |        |          |          |                         |     |       |       |    |    |    |   |   |   |   |  |
| <b>FN1235</b> | 1.403                                                                           | 7.579  |          |          | 1.768      | 8.128  |          |          | 0.553        | 6.525  |          |          | -0.850         | 8.132  | 1.028e-1 | 2.297e-1 | 0.365        | 9.531  | 2.504e-1 | 4.362e-1 | -1.215         | 8.682  | 5.925e-3 | 1.866e-2 |                         |     |       |       |    |    |    |   |   |   |   |  |
|               | AAL95431.1   Ankyrin repeat proteins                                            |        |          |          |            |        |          |          |              |        |          |          |                |        |          |          |              |        |          |          |                |        |          |          |                         |     |       |       |    |    |    |   |   |   |   |  |

Show detected proteins only  
 Show all proteins  
 Filter by category:

Proteins found: 1424

Test Cutoff

| Signif | Direction | Applies To   |
|--------|-----------|--------------|
| yes    | +         | ratios, bars |
| no     | n/a       | bars         |
| yes    | -         | ratios, bars |
| yes    | +         | p-, q-Values |
| yes    | -         | p-, q-Values |

FnPg vs Fn — █ — FnSg vs Fn

FnPgSg vs Fn — █ — FnPgSg vs FnPg

FnSg vs FnPg — █ — FnPgSg vs FnSg

Fn Summary Table

FnPg vs Fn

FnSg vs Fn

FnPgSg vs Fn

FnPgSg vs FnPg

FnSg vs FnPg

FnPgSg vs FnSg

Fn Coverage

| ORF           | FnPg vs Fn                                                     |        |          |          | FnSg vs Fn |        |          |          | FnPgSg vs Fn |        |          |          | FnPgSg vs FnPg |        |          |          | FnSg vs FnPg |        |          |          | FnPgSg vs FnSg |        |          |          | Log <sub>2</sub> Ratios |     |       |       |    |    |    |   |   |   |   |  |
|---------------|----------------------------------------------------------------|--------|----------|----------|------------|--------|----------|----------|--------------|--------|----------|----------|----------------|--------|----------|----------|--------------|--------|----------|----------|----------------|--------|----------|----------|-------------------------|-----|-------|-------|----|----|----|---|---|---|---|--|
|               | Ratio                                                          | Sum    | q-Val    | p-Val    | Ratio      | Sum    | q-Val    | p-Val    | Ratio        | Sum    | q-Val    | p-Val    | Ratio          | Sum    | q-Val    | p-Val    | Ratio        | Sum    | q-Val    | p-Val    | Ratio          | Sum    | q-Val    | p-Val    | Ratio                   | Sum | q-Val | p-Val | -6 | -4 | -2 | 0 | 2 | 4 | 6 |  |
| <b>FN1237</b> | 1.575                                                          | 10.956 | 1.626e-3 | 9.569e-4 | 2.287      | 11.853 | 2.375e-4 | 4.73e-4  | 0.144        | 9.322  | 1.478e-2 | 6.409e-2 | -1.431         | 11.101 | 2.257e-3 | 8.196e-4 | 0.712        | 13.428 | 6.986e-3 | 9.988e-4 | -2.143         | 11.997 | 3.259e-4 | 4.31e-4  |                         |     |       |       |    |    |    |   |   |   |   |  |
|               | AAL95433.1   Choline kinase                                    |        |          |          |            |        |          |          |              |        |          |          |                |        |          |          |              |        |          |          |                |        |          |          |                         |     |       |       |    |    |    |   |   |   |   |  |
| <b>FN1238</b> |                                                                |        |          |          |            |        |          |          |              |        |          |          |                |        |          |          | -0.414       | 4.414  |          |          |                |        |          |          |                         |     |       |       |    |    |    |   |   |   |   |  |
|               | AAL95434.1   Hypothetical protein                              |        |          |          |            |        |          |          |              |        |          |          |                |        |          |          |              |        |          |          |                |        |          |          |                         |     |       |       |    |    |    |   |   |   |   |  |
| <b>FN1239</b> |                                                                |        |          |          |            |        |          |          |              |        |          |          |                |        |          |          |              |        |          |          |                |        |          |          |                         |     |       |       |    |    |    |   |   |   |   |  |
|               | AAL95435.1   Hypothetical protein                              |        |          |          |            |        |          |          |              |        |          |          |                |        |          |          |              |        |          |          |                |        |          |          |                         |     |       |       |    |    |    |   |   |   |   |  |
| <b>FN1240</b> | -1.829                                                         | 8.757  | 4.347e-4 | 1.226e-4 | -2.598     | 8.173  | 6.78e-5  | 9.412e-5 | -2.083       | 8.300  | 2.962e-5 | 1.66e-5  | -0.254         | 6.675  | 1.82e-1  | 5.212e-1 | -0.769       | 6.344  | 1.319e-1 | 1.439e-1 | 0.515          | 6.090  | 1.651e-2 | 6.312e-2 |                         |     |       |       |    |    |    |   |   |   |   |  |
|               | AAL95436.1   Lipopolysaccharide core biosynthesis protein rfaY |        |          |          |            |        |          |          |              |        |          |          |                |        |          |          |              |        |          |          |                |        |          |          |                         |     |       |       |    |    |    |   |   |   |   |  |
| <b>FN1241</b> | -0.139                                                         | 5.668  | 2.521e-1 | 7.514e-1 | 0.491      | 6.482  | 1.888e-2 | 9.616e-2 |              |        |          |          |                |        |          |          | 0.629        | 6.343  | 1.099e-1 | 1.014e-1 |                |        |          |          |                         |     |       |       |    |    |    |   |   |   |   |  |
|               | AAL95437.1   polysaccharide biosynthesis protein               |        |          |          |            |        |          |          |              |        |          |          |                |        |          |          |              |        |          |          |                |        |          |          |                         |     |       |       |    |    |    |   |   |   |   |  |
| <b>FN1242</b> | 0.657                                                          | 7.683  |          |          | 1.104      | 8.315  | 6.253e-5 | 8.35e-5  | -0.936       | 5.887  | 2.737e-3 | 8.818e-3 | -1.592         | 6.748  |          |          | 0.448        | 8.972  |          |          | -2.040         | 7.380  | 2.034e-5 | 9.613e-6 |                         |     |       |       |    |    |    |   |   |   |   |  |
|               | AAL95438.1   Polysaccharide deacetylase                        |        |          |          |            |        |          |          |              |        |          |          |                |        |          |          |              |        |          |          |                |        |          |          |                         |     |       |       |    |    |    |   |   |   |   |  |
| <b>FN1243</b> | 0.021                                                          | 7.594  |          |          | -0.234     | 7.523  | 3.163e-2 | 1.697e-1 | -0.940       | 6.429  | 2.902e-3 | 9.485e-3 | -0.961         | 6.654  |          |          | -0.255       | 7.544  |          |          | -0.706         | 6.584  | 4.124e-5 | 2.651e-5 |                         |     |       |       |    |    |    |   |   |   |   |  |
|               | AAL95439.1   Glycosyl transferase                              |        |          |          |            |        |          |          |              |        |          |          |                |        |          |          |              |        |          |          |                |        |          |          |                         |     |       |       |    |    |    |   |   |   |   |  |
| <b>FN1244</b> | 0.587                                                          | 8.322  | 1.745e-1 | 4.643e-1 | 0.771      | 8.692  | 3.719e-3 | 1.473e-2 | -1.254       | 6.278  | 2.128e-3 | 6.519e-3 | -1.841         | 7.068  | 8.382e-2 | 1.669e-1 | 0.185        | 9.278  | 3.677e-1 | 7.594e-1 | -2.025         | 7.437  | 1.644e-3 | 3.627e-3 |                         |     |       |       |    |    |    |   |   |   |   |  |
|               | AAL95440.1   Polysaccharide deacetylase                        |        |          |          |            |        |          |          |              |        |          |          |                |        |          |          |              |        |          |          |                |        |          |          |                         |     |       |       |    |    |    |   |   |   |   |  |
| <b>FN1245</b> | -2.175                                                         | 6.550  | 1.589e-2 | 2.001e-2 | -1.567     | 7.344  | 7.032e-3 | 3.087e-2 |              |        |          |          |                |        |          |          | 0.609        | 5.168  | 4.202e-3 | 4.429e-4 |                |        |          |          |                         |     |       |       |    |    |    |   |   |   |   |  |
|               | AAL95441.1   Glycosyl transferase                              |        |          |          |            |        |          |          |              |        |          |          |                |        |          |          |              |        |          |          |                |        |          |          |                         |     |       |       |    |    |    |   |   |   |   |  |
| <b>FN1246</b> | -0.372                                                         | 8.186  |          |          | -0.141     | 8.601  | 7.953e-2 | 4.591e-1 | -2.234       | 6.119  |          |          | -1.862         | 5.951  |          |          | 0.231        | 8.229  |          |          | -2.093         | 6.366  |          |          |                         |     |       |       |    |    |    |   |   |   |   |  |
|               | AAL95442.1   Lipooligosaccharide cholinephosphotransferase     |        |          |          |            |        |          |          |              |        |          |          |                |        |          |          |              |        |          |          |                |        |          |          |                         |     |       |       |    |    |    |   |   |   |   |  |
| <b>FN1247</b> | -0.619                                                         | 8.705  | 3.85e-2  | 6.267e-2 | 0.349      | 9.857  | 5.002e-2 | 2.792e-1 | -1.668       | 7.452  | 5.921e-4 | 1.237e-3 | -1.049         | 7.036  | 4.859e-2 | 7.617e-2 | 0.968        | 9.238  | 7.704e-2 | 4.994e-2 | -2.017         | 8.189  | 4.351e-3 | 1.25e-2  |                         |     |       |       |    |    |    |   |   |   |   |  |
|               | AAL95443.1   LOS biosynthesis enzyme LBGB                      |        |          |          |            |        |          |          |              |        |          |          |                |        |          |          |              |        |          |          |                |        |          |          |                         |     |       |       |    |    |    |   |   |   |   |  |
| <b>FN1248</b> |                                                                |        |          |          |            |        |          |          |              |        |          |          |                |        |          |          |              |        |          |          |                |        |          |          |                         |     |       |       |    |    |    |   |   |   |   |  |
|               | AAL95444.1   Hypothetical cytosolic protein                    |        |          |          |            |        |          |          |              |        |          |          |                |        |          |          |              |        |          |          |                |        |          |          |                         |     |       |       |    |    |    |   |   |   |   |  |
| <b>FN1250</b> | -1.376                                                         | 9.925  | 1.084e-3 | 5.351e-4 | -1.336     | 10.150 | 4.866e-4 | 1.184e-3 | -1.028       | 10.069 | 5.004e-4 | 1.001e-3 | 0.348          | 8.897  | 1.072e-1 | 2.464e-1 | 0.040        | 8.774  | 4.033e-1 | 8.823e-1 | 0.308          | 9.122  | 3.567e-2 | 1.518e-1 |                         |     |       |       |    |    |    |   |   |   |   |  |
|               | AAL95446.1   Guanine-hypoxanthine permease                     |        |          |          |            |        |          |          |              |        |          |          |                |        |          |          |              |        |          |          |                |        |          |          |                         |     |       |       |    |    |    |   |   |   |   |  |
| <b>FN1251</b> | -0.530                                                         | 6.145  |          |          | 0.025      | 6.884  | 1.53e-1  | 9.601e-1 | -0.127       | 6.344  | 8.453e-2 | 4.654e-1 | 0.403          | 6.018  |          |          | 0.555        | 6.354  |          |          | -0.152         | 6.757  | 1.525e-1 | 7.785e-1 |                         |     |       |       |    |    |    |   |   |   |   |  |
|               | AAL95447.1   High-affinity iron permease                       |        |          |          |            |        |          |          |              |        |          |          |                |        |          |          |              |        |          |          |                |        |          |          |                         |     |       |       |    |    |    |   |   |   |   |  |
| <b>FN1252</b> | -1.973                                                         | 17.489 | 1.155e-3 | 5.951e-4 | -1.187     | 18.460 | 1.159e-4 | 1.892e-4 | -0.402       | 18.857 | 4.009e-3 | 1.397e-2 | 1.571          | 17.087 | 3.862e-3 | 1.786e-3 | 0.786        | 16.487 | 5.381e-2 | 2.628e-2 | 0.785          | 18.058 | 1.531e-3 | 3.314e-3 |                         |     |       |       |    |    |    |   |   |   |   |  |
|               | AAL95448.1   34 kDa membrane antigen precursor                 |        |          |          |            |        |          |          |              |        |          |          |                |        |          |          |              |        |          |          |                |        |          |          |                         |     |       |       |    |    |    |   |   |   |   |  |
| <b>FN1253</b> | -0.833                                                         | 16.061 | 6.623e-2 | 1.328e-1 | -0.732     | 16.347 | 1.505e-4 | 2.701e-4 | -0.279       | 16.411 | 8.377e-3 | 3.349e-2 | 0.554          | 15.782 | 1.26e-1  | 3.123e-1 | 0.102        | 15.514 | 3.977e-1 | 8.62e-1  | 0.452          | 16.068 | 4.431e-3 | 1.282e-2 |                         |     |       |       |    |    |    |   |   |   |   |  |
|               | AAL95449.1   unknown                                           |        |          |          |            |        |          |          |              |        |          |          |                |        |          |          |              |        |          |          |                |        |          |          |                         |     |       |       |    |    |    |   |   |   |   |  |
| <b>FN1254</b> | -0.817                                                         | 12.908 | 2.362e-2 | 3.338e-2 | -1.036     | 12.873 | 8.79e-5  | 1.331e-4 | 0.021        | 13.541 | 1.426e-1 | 8.416e-1 | 0.837          | 12.928 | 2.476e-2 | 2.872e-2 | -0.219       | 12.056 | 3.057e-1 | 5.75e-1  | 1.056          | 12.894 | 2.61e-4  | 3.21e-4  |                         |     |       |       |    |    |    |   |   |   |   |  |
|               | AAL95450.1   Oxygen-insensitive NAD(P)H nitroreductase         |        |          |          |            |        |          |          |              |        |          |          |                |        |          |          |              |        |          |          |                |        |          |          |                         |     |       |       |    |    |    |   |   |   |   |  |

Show detected proteins only  
 Show all proteins

Proteins found:  
1424

Enter (or paste) list of ORFs

Find ORFs

Test

q-Value

p-Value

Cutoff

.005

Dot Plots

Dot Plots

| Signif | Direction | Applies To   |
|--------|-----------|--------------|
| yes    | +         | ratios, bars |
| no     | n/a       | bars         |
| yes    | -         | ratios, bars |
| yes    | +         | p-, q-Values |
| yes    | -         | p-, q-Values |

FnPg vs Fn — — FnSg vs Fn  
FnPgSg vs Fn — — FnPgSg vs FnPg  
FnSg vs FnPg — — FnPgSg vs FnSg

Fn Summary Table

FnPg vs Fn

FnSg vs Fn

FnPgSg vs Fn

FnPgSg vs FnPg

FnSg vs FnPg

FnPgSg vs FnSg

Fn Coverage

| ORF           | FnPg vs Fn                                               |        |          |          | FnSg vs Fn |        |          |          | FnPgSg vs Fn |        |          |          | FnPgSg vs FnPg |        |          |          | FnSg vs FnPg |        |          |          | FnPgSg vs FnSg |        |          |          | Log <sub>2</sub> Ratios |     |       |       |    |    |    |   |   |   |   |  |
|---------------|----------------------------------------------------------|--------|----------|----------|------------|--------|----------|----------|--------------|--------|----------|----------|----------------|--------|----------|----------|--------------|--------|----------|----------|----------------|--------|----------|----------|-------------------------|-----|-------|-------|----|----|----|---|---|---|---|--|
|               | Ratio                                                    | Sum    | q-Val    | p-Val    | Ratio      | Sum    | q-Val    | p-Val    | Ratio        | Sum    | q-Val    | p-Val    | Ratio          | Sum    | q-Val    | p-Val    | Ratio        | Sum    | q-Val    | p-Val    | Ratio          | Sum    | q-Val    | p-Val    | Ratio                   | Sum | q-Val | p-Val | -6 | -4 | -2 | 0 | 2 | 4 | 6 |  |
| <b>FN1255</b> | AAL95451.1  NagD protein                                 |        |          |          |            |        |          |          |              |        |          |          |                |        |          |          |              |        |          |          |                |        |          |          |                         |     |       |       |    |    |    |   |   |   |   |  |
| <b>FN1256</b> | -0.603                                                   | 4.603  |          |          |            |        |          |          | -0.558       | 4.443  |          |          | 0.044          | 4.044  |          |          |              |        |          |          |                |        |          |          |                         |     |       |       |    |    |    |   |   |   |   |  |
| <b>FN1258</b> | -0.787                                                   | 19.783 | 2.008e-3 | 1.297e-3 | -0.557     | 20.198 | 1.495e-4 | 2.677e-4 | -0.263       | 20.103 | 6.578e-5 | 5.964e-5 | 0.524          | 19.520 | 1.03e-2  | 7.915e-3 | 0.230        | 19.411 | 1.1e-1   | 1.015e-1 | 0.294          | 19.935 | 2.606e-3 | 6.457e-3 |                         |     |       |       |    |    |    |   |   |   |   |  |
| <b>FN1259</b> | AAL95454.1  C4-dicarboxylate-binding protein             |        |          |          |            |        |          |          |              |        |          |          |                |        |          |          |              |        |          |          |                |        |          |          |                         |     |       |       |    |    |    |   |   |   |   |  |
| <b>FN1259</b> | AAL95455.1  hypothetical protein                         |        |          |          |            |        |          |          |              |        |          |          |                |        |          |          |              |        |          |          |                |        |          |          |                         |     |       |       |    |    |    |   |   |   |   |  |
| <b>FN1260</b> |                                                          |        |          |          |            |        |          |          | -0.594       | 3.764  |          |          |                |        |          |          |              |        |          |          |                |        |          |          |                         |     |       |       |    |    |    |   |   |   |   |  |
| <b>FN1260</b> | AAL95456.1  Sensory Transduction Protein Kinase          |        |          |          |            |        |          |          |              |        |          |          |                |        |          |          |              |        |          |          |                |        |          |          |                         |     |       |       |    |    |    |   |   |   |   |  |
| <b>FN1261</b> | 1.385                                                    | 6.168  |          |          |            |        |          |          |              |        |          |          |                |        |          |          |              |        |          |          |                |        |          |          |                         |     |       |       |    |    |    |   |   |   |   |  |
| <b>FN1261</b> | AAL95457.1  Two-component response regulator             |        |          |          |            |        |          |          |              |        |          |          |                |        |          |          |              |        |          |          |                |        |          |          |                         |     |       |       |    |    |    |   |   |   |   |  |
| <b>FN1262</b> | 1.719                                                    | 6.924  |          |          | 1.407      | 6.796  |          |          |              |        |          |          |                |        |          |          | -0.313       | 8.516  |          |          |                |        |          |          |                         |     |       |       |    |    |    |   |   |   |   |  |
| <b>FN1262</b> | AAL95458.1  Integral membrane protein                    |        |          |          |            |        |          |          |              |        |          |          |                |        |          |          |              |        |          |          |                |        |          |          |                         |     |       |       |    |    |    |   |   |   |   |  |
| <b>FN1263</b> | -0.934                                                   | 8.230  | 4.534e-3 | 3.968e-3 | -0.159     | 9.189  | 1.724e-2 | 8.706e-2 | -0.555       | 8.405  | 3.136e-6 | 6.101e-7 | 0.379          | 7.675  | 5.1e-2   | 8.2e-2   | 0.775        | 8.255  | 1.612e-2 | 3.402e-3 | -0.396         | 8.634  | 4.722e-3 | 1.395e-2 |                         |     |       |       |    |    |    |   |   |   |   |  |
| <b>FN1263</b> | AAL95459.1  Cobalt chelatase                             |        |          |          |            |        |          |          |              |        |          |          |                |        |          |          |              |        |          |          |                |        |          |          |                         |     |       |       |    |    |    |   |   |   |   |  |
| <b>FN1264</b> |                                                          |        |          |          | -0.747     | 8.802  | 6.873e-3 | 3.003e-2 | -1.171       | 7.990  | 3.768e-3 | 1.295e-2 |                |        |          |          |              |        |          |          | -0.424         | 7.631  | 2.497e-4 | 3.004e-4 |                         |     |       |       |    |    |    |   |   |   |   |  |
| <b>FN1264</b> | AAL95460.1  Hypothetical protein                         |        |          |          |            |        |          |          |              |        |          |          |                |        |          |          |              |        |          |          |                |        |          |          |                         |     |       |       |    |    |    |   |   |   |   |  |
| <b>FN1265</b> | 0.033                                                    | 13.133 | 2.501e-1 | 7.434e-1 | -0.208     | 13.076 | 3.209e-2 | 1.724e-1 | -0.502       | 12.394 | 7.692e-3 | 3.031e-2 | -0.535         | 12.631 | 2.142e-2 | 2.341e-2 | -0.241       | 13.109 | 1.249e-1 | 1.294e-1 | -0.294         | 12.574 | 4.543e-2 | 2e-1     |                         |     |       |       |    |    |    |   |   |   |   |  |
| <b>FN1265</b> | AAL95461.1  Outer membrane protein                       |        |          |          |            |        |          |          |              |        |          |          |                |        |          |          |              |        |          |          |                |        |          |          |                         |     |       |       |    |    |    |   |   |   |   |  |
| <b>FN1266</b> | -0.752                                                   | 14.116 | 4.763e-3 | 4.265e-3 | -0.726     | 14.326 | 1.444e-3 | 4.639e-3 | -0.561       | 14.103 | 1.174e-3 | 2.972e-3 | 0.191          | 13.555 | 1.125e-1 | 2.645e-1 | 0.026        | 13.574 | 4.062e-1 | 8.932e-1 | 0.165          | 13.765 | 6.992e-2 | 3.243e-1 |                         |     |       |       |    |    |    |   |   |   |   |  |
| <b>FN1266</b> | AAL95462.1  UTP--glucose-1-phosphate uridylyltransferase |        |          |          |            |        |          |          |              |        |          |          |                |        |          |          |              |        |          |          |                |        |          |          |                         |     |       |       |    |    |    |   |   |   |   |  |
| <b>FN1267</b> | 0.132                                                    | 10.711 | 1.759e-1 | 4.702e-1 | -0.323     | 10.440 | 3.336e-2 | 1.8e-1   | -0.318       | 10.057 | 2.622e-7 | 2.119e-8 | -0.450         | 10.393 | 5.226e-2 | 8.518e-2 | -0.455       | 10.572 | 1.202e-1 | 1.199e-1 | 0.005          | 10.122 | 1.85e-1  | 9.817e-1 |                         |     |       |       |    |    |    |   |   |   |   |  |
| <b>FN1267</b> | AAL95463.1  Hypothetical protein                         |        |          |          |            |        |          |          |              |        |          |          |                |        |          |          |              |        |          |          |                |        |          |          |                         |     |       |       |    |    |    |   |   |   |   |  |
| <b>FN1268</b> | -0.507                                                   | 15.890 | 1.852e-2 | 2.451e-2 | -1.071     | 15.511 | 1.415e-3 | 4.529e-3 | -0.610       | 15.583 | 4.232e-3 | 1.493e-2 | -0.103         | 15.280 | 3.814e-2 | 5.386e-2 | -0.563       | 15.004 | 6.929e-4 | 1.394e-5 | 0.461          | 14.901 | 1.65e-4  | 1.688e-4 |                         |     |       |       |    |    |    |   |   |   |   |  |
| <b>FN1268</b> | AAL95464.1  Methionyl-tRNA synthetase                    |        |          |          |            |        |          |          |              |        |          |          |                |        |          |          |              |        |          |          |                |        |          |          |                         |     |       |       |    |    |    |   |   |   |   |  |
| <b>FN1269</b> | -2.042                                                   | 6.042  |          |          | -0.946     | 7.322  |          |          | -1.997       | 5.882  |          |          | 0.044          | 4.044  |          |          | 1.095        | 5.280  |          |          | -1.051         | 5.324  |          |          |                         |     |       |       |    |    |    |   |   |   |   |  |
| <b>FN1269</b> | AAL95465.1  Hypothetical lipoprotein                     |        |          |          |            |        |          |          |              |        |          |          |                |        |          |          |              |        |          |          |                |        |          |          |                         |     |       |       |    |    |    |   |   |   |   |  |
| <b>FN1270</b> | -2.654                                                   | 11.438 |          |          | -3.588     | 10.689 |          |          | 0.528        | 14.416 | 4.406e-4 | 8.485e-4 | 3.182          | 11.966 |          |          | -0.934       | 8.035  |          |          | 4.116          | 11.216 |          |          |                         |     |       |       |    |    |    |   |   |   |   |  |
| <b>FN1270</b> | AAL95466.1  Hypothetical cytosolic protein               |        |          |          |            |        |          |          |              |        |          |          |                |        |          |          |              |        |          |          |                |        |          |          |                         |     |       |       |    |    |    |   |   |   |   |  |
| <b>FN1271</b> | -0.989                                                   | 10.819 | 3.867e-2 | 6.304e-2 | -0.271     | 11.721 | 3.333e-2 | 1.799e-1 | -0.310       | 11.294 | 4.592e-3 | 1.648e-2 | 0.679          | 10.509 | 8.683e-2 | 1.759e-1 | 0.718        | 10.732 | 1.407e-1 | 1.649e-1 | -0.039         | 11.411 | 1.637e-1 | 8.465e-1 |                         |     |       |       |    |    |    |   |   |   |   |  |
| <b>FN1271</b> | AAL95467.1  Protease IV                                  |        |          |          |            |        |          |          |              |        |          |          |                |        |          |          |              |        |          |          |                |        |          |          |                         |     |       |       |    |    |    |   |   |   |   |  |
| <b>FN1273</b> | 0.174                                                    | 10.980 | 2.748e-1 | 8.449e-1 | 0.531      | 11.522 | 2.203e-2 | 1.139e-1 | -1.363       | 9.239  | 1.301e-2 | 5.546e-2 | -1.537         | 9.617  | 1.198e-1 | 2.898e-1 | 0.357        | 11.696 | 3.223e-1 | 6.208e-1 | -1.894         | 10.159 | 3.127e-7 | 2.423e-8 |                         |     |       |       |    |    |    |   |   |   |   |  |
| <b>FN1273</b> | AAL95469.1  Outer membrane protein toIC                  |        |          |          |            |        |          |          |              |        |          |          |                |        |          |          |              |        |          |          |                |        |          |          |                         |     |       |       |    |    |    |   |   |   |   |  |

Show detected proteins only  
 Show all proteins  
 Filter by category:

Proteins found: 1424

Enter (or paste) list of ORFs

Find ORFs

Test Cutoff

q-Value p-Value

.005

Dot Plots

| Signif | Direction | Applies To   |
|--------|-----------|--------------|
| yes    | +         | ratios, bars |
| no     | n/a       | bars         |
| yes    | -         | ratios, bars |
| yes    | +         | p-, q-Values |
| yes    | -         | p-, q-Values |

FnPg vs Fn — █ — FnSg vs Fn  
 FnPgSg vs Fn — █ — FnPgSg vs FnPg  
 FnSg vs FnPg — █ — FnPgSg vs FnSg

Fn Summary Table

FnPg vs Fn

FnSg vs Fn

FnPgSg vs Fn

FnPgSg vs FnPg

FnSg vs FnPg

FnPgSg vs FnSg

Fn Coverage

| ORF                                                                                    | FnPg vs Fn |        |          |          | FnSg vs Fn |        |          |          | FnPgSg vs Fn |        |          |          | FnPgSg vs FnPg |        |          |          | FnSg vs FnPg |        |          |          | FnPgSg vs FnSg |        |          |          | Log <sub>2</sub> Ratios |     |       |       |    |    |    |   |   |   |   |  |  |  |  |  |  |  |  |
|----------------------------------------------------------------------------------------|------------|--------|----------|----------|------------|--------|----------|----------|--------------|--------|----------|----------|----------------|--------|----------|----------|--------------|--------|----------|----------|----------------|--------|----------|----------|-------------------------|-----|-------|-------|----|----|----|---|---|---|---|--|--|--|--|--|--|--|--|
|                                                                                        | Ratio      | Sum    | q-Val    | p-Val    | Ratio      | Sum    | q-Val    | p-Val    | Ratio        | Sum    | q-Val    | p-Val    | Ratio          | Sum    | q-Val    | p-Val    | Ratio        | Sum    | q-Val    | p-Val    | Ratio          | Sum    | q-Val    | p-Val    | Ratio                   | Sum | q-Val | p-Val | -6 | -4 | -2 | 0 | 2 | 4 | 6 |  |  |  |  |  |  |  |  |
| <b>FN1274</b><br>AAL95470.1   Acriflavin resistance protein E                          | -2.178     | 9.111  | 8.321e-4 | 3.478e-4 | -1.250     | 10.223 | 5.095e-4 | 1.258e-3 | -1.745       | 9.340  | 4.319e-4 | 8.273e-4 | 0.433          | 7.366  | 1.519e-1 | 4.081e-1 | 0.927        | 8.045  | 1.006e-1 | 8.603e-2 | -0.494         | 8.478  | 8.989e-4 | 1.686e-3 |                         |     |       |       |    |    |    |   |   |   |   |  |  |  |  |  |  |  |  |
| <b>FN1275</b><br>AAL95471.1   Acriflavin resistance protein B                          | -1.966     | 9.836  | 2.602e-4 | 5.783e-5 | -1.572     | 10.413 | 2.811e-4 | 5.884e-4 | -1.300       | 10.297 | 7.017e-5 | 6.519e-5 | 0.666          | 8.536  | 4.553e-2 | 6.916e-2 | 0.393        | 8.448  | 1.715e-1 | 2.418e-1 | 0.273          | 9.113  | 3.324e-2 | 1.4e-1   |                         |     |       |       |    |    |    |   |   |   |   |  |  |  |  |  |  |  |  |
| <b>FN1276</b><br>AAL95472.1   Hypothetical protein                                     |            |        |          |          |            |        |          |          |              |        |          |          | -1.157         | 7.168  | 3.697e-3 | 1.684e-3 | 0.028        | 8.537  | 3.846e-1 | 8.16e-1  | -1.184         | 7.380  | 7.721e-4 | 1.37e-3  |                         |     |       |       |    |    |    |   |   |   |   |  |  |  |  |  |  |  |  |
| <b>FN1277</b><br>AAL95473.1   Aminoacyl-histidine dipeptidase                          | 0.370      | 15.287 | 1.416e-1 | 3.524e-1 | 0.267      | 15.369 | 6.773e-3 | 2.95e-2  | 0.072        | 14.785 | 6.748e-2 | 3.611e-1 | -0.298         | 15.359 | 1.58e-1  | 4.298e-1 | -0.103       | 15.739 | 3.686e-1 | 7.621e-1 | -0.195         | 15.440 | 1.632e-2 | 6.224e-2 |                         |     |       |       |    |    |    |   |   |   |   |  |  |  |  |  |  |  |  |
| <b>FN1278</b><br>AAL95474.1   Acetyltransferase                                        |            |        |          |          |            |        |          |          |              |        |          |          | 2.044          | 5.214  |          |          | 1.782        | 5.137  |          |          | 0.262          | 7.181  |          |          |                         |     |       |       |    |    |    |   |   |   |   |  |  |  |  |  |  |  |  |
| <b>FN1279</b><br>AAL95475.1   Zinc metallohydrolase, glyoxalase II family              | -0.542     | 12.225 | 3.008e-3 | 2.25e-3  | -0.890     | 12.061 | 1.02e-4  | 1.603e-4 | -0.736       | 11.827 | 8.152e-4 | 1.842e-3 | -0.194         | 11.489 | 8.004e-2 | 1.56e-1  | -0.348       | 11.520 | 6.965e-2 | 4.101e-2 | 0.154          | 11.326 | 2.489e-2 | 1.01e-1  |                         |     |       |       |    |    |    |   |   |   |   |  |  |  |  |  |  |  |  |
| <b>FN1280</b><br>AAL95476.1   Serine protease, V8 family                               | 2.279      | 9.432  | 9.521e-5 | 1.248e-5 | 3.038      | 10.375 | 3.156e-4 | 6.873e-4 | 0.286        | 7.234  | 1.051e-2 | 4.36e-2  | -1.994         | 9.717  | 5.39e-4  | 9.995e-5 | 0.758        | 12.654 | 2.161e-2 | 5.248e-3 | -2.752         | 10.660 | 5.523e-4 | 8.591e-4 |                         |     |       |       |    |    |    |   |   |   |   |  |  |  |  |  |  |  |  |
| <b>FN1281</b><br>AAL95477.1   Cysteine protease                                        | -0.305     | 8.518  | 8.875e-2 | 1.946e-1 | 0.629      | 9.636  | 4.332e-3 | 1.759e-2 |              |        |          |          |                |        |          |          | 0.934        | 9.331  | 1.248e-3 | 4.666e-5 |                |        |          |          |                         |     |       |       |    |    |    |   |   |   |   |  |  |  |  |  |  |  |  |
| <b>FN1282</b><br>AAL95478.1   LSU ribosomal protein L17P                               | 0.471      | 12.375 | 8.354e-2 | 1.801e-1 | 0.250      | 12.338 | 1.182e-2 | 5.664e-2 | 0.704        | 12.404 | 1.554e-5 | 6.064e-6 | 0.233          | 13.079 | 1.369e-1 | 3.545e-1 | -0.221       | 12.809 | 2.555e-1 | 4.482e-1 | 0.455          | 13.042 | 1.408e-3 | 2.984e-3 |                         |     |       |       |    |    |    |   |   |   |   |  |  |  |  |  |  |  |  |
| <b>FN1283</b><br>AAL95479.1   DNA-directed RNA polymerase alpha chain                  | -0.083     | 17.505 | 1.086e-1 | 2.515e-1 | 0.423      | 18.195 | 1.589e-2 | 7.951e-2 | 1.182        | 18.566 | 6.679e-6 | 1.76e-6  | 1.265          | 18.687 | 8.716e-5 | 6.423e-6 | 0.506        | 18.113 | 7.992e-2 | 5.392e-2 | 0.759          | 19.378 | 2.37e-3  | 5.732e-3 |                         |     |       |       |    |    |    |   |   |   |   |  |  |  |  |  |  |  |  |
| <b>FN1284</b><br>AAL95480.1   SSU ribosomal protein S4P                                | -0.803     | 18.736 | 3.716e-2 | 5.98e-2  | -1.208     | 18.516 | 3.448e-7 | 3.598e-8 | -0.356       | 18.980 | 3.92e-5  | 2.886e-5 | 0.448          | 18.380 | 1.071e-1 | 2.46e-1  | -0.404       | 17.713 | 2.38e-1  | 4.058e-1 | 0.852          | 18.160 | 1.686e-5 | 6.882e-6 |                         |     |       |       |    |    |    |   |   |   |   |  |  |  |  |  |  |  |  |
| <b>FN1285</b><br>AAL95481.1   SSU ribosomal protein S11P                               | 1.408      | 14.708 | 1.326e-1 | 3.242e-1 | -2.246     | 11.238 | 2.49e-5  | 2.234e-5 | 0.344        | 13.440 | 1.377e-3 | 3.737e-3 | -1.064         | 15.052 | 1.489e-1 | 3.973e-1 | -3.654       | 12.646 | 1.466e-1 | 1.806e-1 | 2.590          | 11.582 | 1.366e-4 | 1.301e-4 |                         |     |       |       |    |    |    |   |   |   |   |  |  |  |  |  |  |  |  |
| <b>FN1286</b><br>AAL95482.1   SSU ribosomal protein S13P                               | -2.940     | 14.401 | 1.158e-4 | 1.712e-5 | -2.156     | 15.369 | 1.562e-6 | 3.129e-7 | -1.897       | 15.240 | 3.128e-6 | 6.078e-7 | 1.043          | 12.504 | 1.179e-2 | 9.704e-3 | 0.784        | 12.429 | 2.419e-2 | 6.321e-3 | 0.259          | 13.472 | 4.274e-2 | 1.867e-1 |                         |     |       |       |    |    |    |   |   |   |   |  |  |  |  |  |  |  |  |
| <b>FN1287</b><br>AAL95483.1   Bacterial Protein Translation Initiation Factor 1 (IF-1) | -1.021     | 9.866  | 2.957e-2 | 4.434e-2 | -2.227     | 8.844  | 5.401e-5 | 6.771e-5 | -2.396       | 8.287  | 3.07e-5  | 1.768e-5 | -1.375         | 7.470  | 7.396e-2 | 1.394e-1 | -1.206       | 7.823  | 1.397e-1 | 1.624e-1 | -0.169         | 6.448  | 1.021e-1 | 4.92e-1  |                         |     |       |       |    |    |    |   |   |   |   |  |  |  |  |  |  |  |  |
| <b>FN1290</b><br>AAL95486.1   Hypothetical protein                                     | 0.645      | 10.431 | 1.852e-1 | 5.055e-1 | -0.935     | 9.035  | 3.475e-3 | 1.35e-2  | -1.483       | 8.099  | 2.174e-4 | 3.29e-4  | -2.128         | 8.949  | 9.586e-2 | 2.05e-1  | -1.581       | 9.681  | 1.784e-1 | 2.584e-1 | -0.547         | 7.552  | 4.987e-2 | 2.222e-1 |                         |     |       |       |    |    |    |   |   |   |   |  |  |  |  |  |  |  |  |
| <b>FN1293</b><br>AAL95489.1   Hypothetical protein                                     |            |        |          |          | -0.864     | 5.625  |          |          | -0.693       | 5.408  |          |          |                |        |          |          |              |        |          |          | 0.171          | 4.932  |          |          |                         |     |       |       |    |    |    |   |   |   |   |  |  |  |  |  |  |  |  |
| <b>FN1296</b><br>AAL95492.1   unknown                                                  |            |        |          |          |            |        |          |          | -1.566       | 7.856  | 5.053e-3 | 1.849e-2 |                |        |          |          |              |        |          |          |                |        |          |          |                         |     |       |       |    |    |    |   |   |   |   |  |  |  |  |  |  |  |  |

Show detected proteins only  
 Show all proteins  
 Filter by category:

Proteins found: 1424

Test Cutoff

| Signif | Direction | Applies To   |
|--------|-----------|--------------|
| yes    | +         | ratios, bars |
| no     | n/a       | bars         |
| yes    | -         | ratios, bars |
| yes    | +         | p-, q-Values |
| yes    | -         | p-, q-Values |

*FnPg vs Fn* — █ — *FnSg vs Fn*  
*FnPgSg vs Fn* — █ — *FnPgSg vs FnPg*  
*FnSg vs FnPg* — █ — *FnPgSg vs FnSg*

Fn Summary Table

FnPg vs Fn

FnSg vs Fn

FnPgSg vs Fn

FnPgSg vs FnPg

FnSg vs FnPg

FnPgSg vs FnSg

Fn Coverage

| ORF                                                               | FnPg vs Fn |        |          |          | FnSg vs Fn |        |          |          | FnPgSg vs Fn |        |          |          | FnPgSg vs FnPg |        |          |          | FnSg vs FnPg |        |          |          | FnPgSg vs FnSg |        |          |          | Log <sub>2</sub> Ratios |     |       |       |    |    |    |   |   |   |   |  |  |  |  |  |  |  |  |  |
|-------------------------------------------------------------------|------------|--------|----------|----------|------------|--------|----------|----------|--------------|--------|----------|----------|----------------|--------|----------|----------|--------------|--------|----------|----------|----------------|--------|----------|----------|-------------------------|-----|-------|-------|----|----|----|---|---|---|---|--|--|--|--|--|--|--|--|--|
|                                                                   | Ratio      | Sum    | q-Val    | p-Val    | Ratio      | Sum    | q-Val    | p-Val    | Ratio        | Sum    | q-Val    | p-Val    | Ratio          | Sum    | q-Val    | p-Val    | Ratio        | Sum    | q-Val    | p-Val    | Ratio          | Sum    | q-Val    | p-Val    | Ratio                   | Sum | q-Val | p-Val | -6 | -4 | -2 | 0 | 2 | 4 | 6 |  |  |  |  |  |  |  |  |  |
| <b>FN1297</b><br>AAL95493.1   Methionine aminopeptidase           | -0.841     | 9.444  | 4.337e-3 | 3.722e-3 | -0.261     | 10.208 | 5.042e-3 | 2.088e-2 | 0.451        | 10.532 | 6.444e-3 | 2.469e-2 | 1.292          | 9.895  | 1.69e-3  | 5.399e-4 | 0.580        | 9.368  | 2.583e-2 | 7.093e-3 | 0.712          | 10.659 | 2.065e-3 | 4.807e-3 |                         |     |       |       |    |    |    |   |   |   |   |  |  |  |  |  |  |  |  |  |
| <b>FN1298</b><br>AAL95494.1   Adenylate kinase                    | -0.719     | 13.058 | 7.377e-3 | 7.764e-3 | -1.411     | 12.551 | 2.195e-3 | 7.624e-3 | -0.430       | 13.144 | 1.609e-2 | 7.057e-2 | 0.289          | 12.628 | 1.183e-1 | 2.843e-1 | -0.692       | 11.831 | 1.109e-1 | 1.031e-1 | 0.982          | 12.121 | 1.02e-2  | 3.586e-2 |                         |     |       |       |    |    |    |   |   |   |   |  |  |  |  |  |  |  |  |  |
| <b>FN1299</b><br>AAL95495.1   dTDP-glucose 4,6-dehydratase        |            |        |          |          |            |        |          |          |              |        |          |          |                |        |          |          | -0.068       | 5.287  |          |          |                |        |          |          |                         |     |       |       |    |    |    |   |   |   |   |  |  |  |  |  |  |  |  |  |
| <b>FN1301</b><br>AAL95497.1   ABC transporter ATP-binding protein | -0.775     | 12.818 | 4.601e-2 | 8.006e-2 | -1.250     | 12.528 | 5.191e-6 | 2.015e-6 | -0.404       | 12.985 | 8.358e-4 | 1.9e-3   | 0.371          | 12.414 | 1.407e-1 | 3.68e-1  | -0.475       | 11.753 | 2.3e-1   | 3.849e-1 | 0.846          | 12.124 | 3.104e-4 | 4.039e-4 |                         |     |       |       |    |    |    |   |   |   |   |  |  |  |  |  |  |  |  |  |
| <b>FN1302</b><br>AAL95498.1   Hypothetical protein                | 0.143      | 17.191 | 2.688e-1 | 8.195e-1 | -1.858     | 15.374 | 1.188e-3 | 3.661e-3 | 0.595        | 17.439 | 1.779e-3 | 5.238e-3 | 0.452          | 17.786 | 1.5e-1   | 4.013e-1 | -2.002       | 15.517 | 1.294e-1 | 1.387e-1 | 2.453          | 15.969 | 4.184e-4 | 5.898e-4 |                         |     |       |       |    |    |    |   |   |   |   |  |  |  |  |  |  |  |  |  |
| <b>FN1303</b><br>AAL95499.1   hypothetical cytosolic protein      | -0.634     | 12.859 | 6.586e-4 | 2.35e-4  | -0.799     | 12.879 | 3.786e-5 | 4.019e-5 | -0.764       | 12.525 | 5.782e-5 | 4.994e-5 | -0.130         | 12.095 | 1.106e-1 | 2.58e-1  | -0.165       | 12.244 | 1.421e-1 | 1.683e-1 | 0.035          | 12.114 | 1.474e-1 | 7.479e-1 |                         |     |       |       |    |    |    |   |   |   |   |  |  |  |  |  |  |  |  |  |
| <b>FN1304</b><br>AAL95500.1   Single-strand DNA binding protein   | -0.297     | 14.350 | 3.374e-2 | 5.275e-2 | -0.525     | 14.306 | 1.29e-4  | 2.185e-4 | -0.135       | 14.308 | 1.864e-4 | 8.348e-2 | 0.162          | 14.215 | 1.013e-1 | 2.242e-1 | -0.228       | 14.009 | 1.296e-1 | 1.391e-1 | 0.391          | 14.171 | 1.726e-3 | 3.858e-3 |                         |     |       |       |    |    |    |   |   |   |   |  |  |  |  |  |  |  |  |  |
| <b>FN1305</b><br>AAL95501.1   Hypothetical cytosolic protein      | 0.390      | 11.020 | 1.948e-3 | 1.24e-3  | -0.035     | 10.780 | 1.491e-1 | 9.309e-1 | -0.462       | 9.965  | 2.969e-2 | 1.419e-1 | -0.851         | 10.558 | 1.935e-2 | 2.027e-2 | -0.424       | 11.170 | 1.855e-1 | 2.762e-1 | -0.427         | 10.319 | 8.954e-2 | 4.254e-1 |                         |     |       |       |    |    |    |   |   |   |   |  |  |  |  |  |  |  |  |  |
| <b>FN1306</b><br>AAL95502.1   Methyltransferase                   | 0.930      | 14.022 |          |          | 1.030      | 14.306 | 2.074e-3 | 7.116e-3 | -1.696       | 11.192 | 1.299e-5 | 4.587e-6 | -2.626         | 12.326 |          |          | 0.100        | 15.236 |          |          | -2.726         | 12.610 | 7.839e-4 | 1.4e-3   |                         |     |       |       |    |    |    |   |   |   |   |  |  |  |  |  |  |  |  |  |
| <b>FN1309</b><br>AAL95505.1   Hypothetical protein                | -1.262     | 15.446 | 2.089e-3 | 1.378e-3 | -1.337     | 15.556 | 2.779e-4 | 5.794e-4 | 0.143        | 16.647 | 2.402e-2 | 1.11e-1  | 1.405          | 15.589 | 4.227e-4 | 6.75e-5  | -0.074       | 14.294 | 3.691e-1 | 7.639e-1 | 1.479          | 15.699 | 4.567e-5 | 3.076e-5 |                         |     |       |       |    |    |    |   |   |   |   |  |  |  |  |  |  |  |  |  |
| <b>FN1311</b><br>AAL95507.1   Biopolymer transport exbD protein   |            |        |          |          |            |        |          |          |              |        |          |          |                |        |          |          |              |        |          |          |                |        |          |          |                         |     |       |       |    |    |    |   |   |   |   |  |  |  |  |  |  |  |  |  |
| <b>FN1312</b><br>AAL95508.1   Biopolymer transport exbB protein   |            |        |          |          |            |        |          |          |              |        |          |          |                |        |          |          |              |        |          |          |                |        |          |          |                         |     |       |       |    |    |    |   |   |   |   |  |  |  |  |  |  |  |  |  |
| <b>FN1313</b><br>AAL95509.1   Oligopeptide-binding protein oppA   | -0.725     | 12.654 | 8.857e-4 | 3.897e-4 | -0.678     | 12.885 | 1.501e-4 | 2.691e-4 | -0.522       | 12.653 | 1.252e-2 | 5.31e-2  | 0.203          | 12.132 | 1.645e-1 | 4.536e-1 | 0.047        | 12.160 | 3.583e-1 | 7.289e-1 | 0.157          | 12.363 | 1.121e-1 | 5.463e-1 |                         |     |       |       |    |    |    |   |   |   |   |  |  |  |  |  |  |  |  |  |
| <b>FN1315</b><br>AAL95511.1   Hypothetical protein                |            |        |          |          | -0.215     | 6.145  |          |          |              |        |          |          |                |        |          |          |              |        |          |          |                |        |          |          |                         |     |       |       |    |    |    |   |   |   |   |  |  |  |  |  |  |  |  |  |
| <b>FN1317</b><br>AAL95513.1   RNA polymerase sigma factor         | -0.425     | 7.763  | 6.64e-2  | 1.333e-1 | -0.766     | 7.607  | 6.868e-4 | 1.857e-3 |              |        |          |          |                |        |          |          | -0.341       | 7.182  | 1.95e-1  | 3.013e-1 |                |        |          |          |                         |     |       |       |    |    |    |   |   |   |   |  |  |  |  |  |  |  |  |  |
| <b>FN1318</b><br>AAL95514.1   RNA polymerase sigma factor rpoD    | -0.535     | 10.215 | 1.379e-2 | 1.671e-2 | -0.955     | 9.979  | 9.638e-4 | 2.849e-3 | -0.272       | 10.274 | 9.167e-3 | 3.726e-2 | 0.262          | 9.943  | 8.204e-2 | 1.617e-1 | -0.420       | 9.445  | 1.354e-1 | 1.52e-1  | 0.683          | 9.707  | 7.783e-3 | 2.606e-2 |                         |     |       |       |    |    |    |   |   |   |   |  |  |  |  |  |  |  |  |  |
| <b>FN1319</b><br>AAL95515.1   DNA primase                         | -0.561     | 7.146  | 7.728e-3 | 8.256e-3 | 0.640      | 8.531  | 4.834e-2 | 2.689e-1 | -0.848       | 6.655  | 8.414e-4 | 1.916e-3 | -0.286         | 6.298  | 7.803e-2 | 1.504e-1 | 1.201        | 7.970  | 1.214e-1 | 1.221e-1 | -1.487         | 7.683  | 2.276e-2 | 9.15e-2  |                         |     |       |       |    |    |    |   |   |   |   |  |  |  |  |  |  |  |  |  |

Show detected proteins only

Show all proteins

Filter by category:

GO: amino acid transport

Proteins found: 1424

Enter (or paste) list of ORFs

Find ORFs

Test Cutoff

q-Value .005

p-Value

Dot Plots

Dot Plots

| Signif | Direction | Applies To   |
|--------|-----------|--------------|
| yes    | +         | ratios, bars |
| no     | n/a       | bars         |
| yes    | -         | ratios, bars |
| yes    | +         | p-, q-Values |
| yes    | -         | p-, q-Values |

FnPg vs Fn —

FnPgSg vs Fn —

FnSg vs FnPg —

FnSg vs Fn —

FnPgSg vs FnPg —

FnPgSg vs FnSg —



Fn Summary Table FnPg vs Fn FnSg vs Fn FnPgSg vs Fn FnPgSg vs FnPg FnSg vs FnPg FnPgSg vs FnSg Fn Coverage

| ORF           | FnPg vs Fn                                                       |        |          |          | FnSg vs Fn |        |          |          | FnPgSg vs Fn |        |          |          | FnPgSg vs FnPg |        |          |          | FnSg vs FnPg |        |          |          | FnPgSg vs FnSg |        |          |          | Log <sub>2</sub> Ratios |       |       |       |    |    |    |   |   |   |   |  |
|---------------|------------------------------------------------------------------|--------|----------|----------|------------|--------|----------|----------|--------------|--------|----------|----------|----------------|--------|----------|----------|--------------|--------|----------|----------|----------------|--------|----------|----------|-------------------------|-------|-------|-------|----|----|----|---|---|---|---|--|
|               | Ratio                                                            | Sum    | q-Val    | p-Val    | Ratio      | Sum    | q-Val    | p-Val    | Ratio        | Sum    | q-Val    | p-Val    | Ratio          | Sum    | q-Val    | p-Val    | Ratio        | Sum    | q-Val    | p-Val    | Ratio          | Sum    | q-Val    | p-Val    | Ratio                   | Sum   | q-Val | p-Val | -6 | -4 | -2 | 0 | 2 | 4 | 6 |  |
| <b>FN1341</b> | -0.268                                                           | 7.438  |          |          | -0.459     | 7.432  | 2.206e-3 | 7.673e-3 | 0.410        | 7.913  | 2.967e-2 | 1.418e-1 | 0.678          | 7.848  |          |          | -0.191       | 7.163  |          |          | 0.869          | 7.842  | 9.887e-3 | 3.455e-2 |                         |       |       |       |    |    |    |   |   |   |   |  |
|               | AAL95537.1   Bacterial Peptide Chain Release Factor 2 (RF-2)     |        |          |          |            |        |          |          |              |        |          |          |                |        |          |          |              |        |          |          |                |        |          |          |                         |       |       |       |    |    |    |   |   |   |   |  |
| <b>FN1343</b> | 1.511                                                            | 9.473  |          |          | 0.735      | 8.881  |          |          |              |        |          |          |                |        |          |          | -0.776       | 10.392 |          |          |                |        |          |          |                         |       |       |       |    |    |    |   |   |   |   |  |
|               | AAL95539.1   seC-independent protein TATD                        |        |          |          |            |        |          |          |              |        |          |          |                |        |          |          |              |        |          |          |                |        |          |          |                         |       |       |       |    |    |    |   |   |   |   |  |
| <b>FN1345</b> |                                                                  |        |          |          |            |        |          |          |              |        |          |          |                |        |          |          |              |        |          |          |                |        |          |          |                         |       |       |       |    |    |    |   |   |   |   |  |
|               | AAL95541.1   2-hydroxy-6-oxo-6-phenylhexa-2,4-dienoate hydrolase |        |          |          |            |        |          |          |              |        |          |          |                |        |          |          |              |        |          |          |                |        |          |          |                         |       |       |       |    |    |    |   |   |   |   |  |
| <b>FN1346</b> |                                                                  |        |          |          |            |        |          |          |              |        |          |          |                |        |          |          | 1.590        | 6.945  |          |          |                |        |          |          |                         |       |       |       |    |    |    |   |   |   |   |  |
|               | AAL95542.1   Hypothetical cytosolic protein                      |        |          |          |            |        |          |          |              |        |          |          |                |        |          |          |              |        |          |          |                |        |          |          |                         |       |       |       |    |    |    |   |   |   |   |  |
| <b>FN1347</b> | -1.806                                                           | 7.591  | 1.867e-3 | 1.164e-3 | -2.035     | 7.547  | 5.083e-4 | 1.254e-3 | -1.168       | 8.025  | 8.866e-4 | 2.047e-3 | 0.638          | 6.423  | 1.853e-3 | 6.23e-4  | -0.229       | 5.740  | 6.766e-2 | 3.884e-2 | 0.867          | 6.378  | 5.785e-4 | 9.184e-4 |                         |       |       |       |    |    |    |   |   |   |   |  |
|               | AAL95543.1   Hypothetical cytosolic protein                      |        |          |          |            |        |          |          |              |        |          |          |                |        |          |          |              |        |          |          |                |        |          |          |                         |       |       |       |    |    |    |   |   |   |   |  |
| <b>FN1348</b> | -1.177                                                           | 8.158  | 1.437e-2 | 1.76e-2  | 0.261      | 9.781  | 3.153e-2 | 1.691e-1 | -0.313       | 8.818  | 1.086e-1 | 6.168e-1 | 0.864          | 7.845  | 1.433e-1 | 3.773e-1 | 1.438        | 8.604  | 2.334e-2 | 5.951e-3 | -0.574         | 9.468  | 7.142e-2 | 3.322e-1 |                         |       |       |       |    |    |    |   |   |   |   |  |
|               | AAL95544.1   ABC transporter ATP-binding protein                 |        |          |          |            |        |          |          |              |        |          |          |                |        |          |          |              |        |          |          |                |        |          |          |                         |       |       |       |    |    |    |   |   |   |   |  |
| <b>FN1349</b> | -2.532                                                           | 8.146  |          |          | -2.175     | 8.687  | 1.369e-4 | 2.374e-4 | -2.237       | 8.237  |          |          |                |        |          |          | 0.295        | 5.909  |          |          | 0.357          | 6.156  |          |          | -0.062                  | 6.451 |       |       |    |    |    |   |   |   |   |  |
|               | AAL95545.1   ABC transporter permease protein                    |        |          |          |            |        |          |          |              |        |          |          |                |        |          |          |              |        |          |          |                |        |          |          |                         |       |       |       |    |    |    |   |   |   |   |  |
| <b>FN1351</b> | -0.416                                                           | 11.067 | 8.498e-2 | 1.841e-1 | -0.432     | 11.235 | 3.188e-2 | 1.711e-1 | -1.101       | 10.178 | 6.715e-3 | 2.589e-2 | -0.686         | 9.966  | 2.08e-2  | 2.244e-2 | -0.016       | 10.820 | 4.085e-1 | 9.017e-1 | -0.670         | 10.134 | 7.207e-3 | 2.367e-2 |                         |       |       |       |    |    |    |   |   |   |   |  |
|               | AAL95547.1   15 kDa lipoprotein precursor                        |        |          |          |            |        |          |          |              |        |          |          |                |        |          |          |              |        |          |          |                |        |          |          |                         |       |       |       |    |    |    |   |   |   |   |  |
| <b>FN1352</b> | -0.521                                                           | 11.686 | 3.2e-3   | 2.46e-3  | -0.474     | 11.918 | 3.852e-3 | 1.541e-2 | -0.191       | 11.812 | 1.493e-2 | 6.484e-2 | 0.330          | 11.495 | 1.903e-2 | 1.981e-2 | 0.047        | 11.397 | 3.625e-1 | 7.424e-1 | 0.283          | 11.727 | 1.938e-2 | 7.597e-2 |                         |       |       |       |    |    |    |   |   |   |   |  |
|               | AAL95548.1   ABC transporter ATP-binding protein                 |        |          |          |            |        |          |          |              |        |          |          |                |        |          |          |              |        |          |          |                |        |          |          |                         |       |       |       |    |    |    |   |   |   |   |  |
| <b>FN1353</b> | -0.149                                                           | 7.764  |          |          | -0.205     | 7.892  | 1.059e-1 | 6.293e-1 | -0.576       | 7.133  | 5.372e-2 | 2.804e-1 | -0.427         | 7.188  |          |          | -0.056       | 7.743  |          |          | -0.371         | 7.316  | 5.968e-2 | 2.716e-1 |                         |       |       |       |    |    |    |   |   |   |   |  |
|               | AAL95549.1   ABC transporter permease protein                    |        |          |          |            |        |          |          |              |        |          |          |                |        |          |          |              |        |          |          |                |        |          |          |                         |       |       |       |    |    |    |   |   |   |   |  |
| <b>FN1354</b> | -0.116                                                           | 10.024 |          |          | -0.699     | 9.626  | 3.802e-3 | 1.516e-2 | -0.511       | 9.426  | 7.899e-3 | 3.126e-2 | -0.395         | 9.513  |          |          | -0.583       | 9.510  |          |          | 0.188          | 9.115  | 7.149e-2 | 3.325e-1 |                         |       |       |       |    |    |    |   |   |   |   |  |
|               | AAL95550.1   ABC transporter permease protein                    |        |          |          |            |        |          |          |              |        |          |          |                |        |          |          |              |        |          |          |                |        |          |          |                         |       |       |       |    |    |    |   |   |   |   |  |
| <b>FN1355</b> |                                                                  |        |          |          |            |        |          |          | -1.125       | 4.295  |          |          |                |        |          |          |              |        |          |          |                |        |          |          |                         |       |       |       |    |    |    |   |   |   |   |  |
|               | AAL95551.1   Integral membrane protein                           |        |          |          |            |        |          |          |              |        |          |          |                |        |          |          |              |        |          |          |                |        |          |          |                         |       |       |       |    |    |    |   |   |   |   |  |
| <b>FN1358</b> |                                                                  |        |          |          |            |        |          |          |              |        |          |          | -0.327         | 10.843 |          |          | -0.455       | 10.899 |          |          | 0.128          | 10.572 | 1.125e-1 | 5.481e-1 |                         |       |       |       |    |    |    |   |   |   |   |  |
|               | AAL95554.1   Hypothetical protein                                |        |          |          |            |        |          |          |              |        |          |          |                |        |          |          |              |        |          |          |                |        |          |          |                         |       |       |       |    |    |    |   |   |   |   |  |
| <b>FN1359</b> | 1.675                                                            | 16.313 | 6.126e-2 | 1.195e-1 | 2.297      | 17.119 | 1.388e-3 | 4.424e-3 | -0.764       | 13.669 | 1.43e-3  | 3.94e-3  | -2.440         | 15.548 | 5.137e-2 | 8.292e-2 | 0.621        | 18.794 | 1.536e-1 | 1.993e-1 | -3.061         | 16.354 | 1.608e-3 | 3.526e-3 |                         |       |       |       |    |    |    |   |   |   |   |  |
|               | AAL95555.1   Dipeptide-binding protein                           |        |          |          |            |        |          |          |              |        |          |          |                |        |          |          |              |        |          |          |                |        |          |          |                         |       |       |       |    |    |    |   |   |   |   |  |
| <b>FN1362</b> |                                                                  |        |          |          |            |        |          |          |              |        |          |          |                |        |          |          | 0.703        | 12.295 | 7.088e-2 | 4.238e-2 |                |        |          |          |                         |       |       |       |    |    |    |   |   |   |   |  |
|               | AAL95558.1   Dipeptide transport ATP-binding protein dppD        |        |          |          |            |        |          |          |              |        |          |          |                |        |          |          |              |        |          |          |                |        |          |          |                         |       |       |       |    |    |    |   |   |   |   |  |
| <b>FN1363</b> | 1.759                                                            | 8.809  | 3.939e-2 | 6.462e-2 | 2.705      | 9.941  | 2.934e-4 | 6.228e-4 | -1.279       | 5.568  | 1.554e-2 | 6.78e-2  | -3.037         | 7.531  | 3.106e-2 | 4.001e-2 | 0.947        | 11.699 | 5.358e-2 | 2.605e-2 | -3.984         | 8.662  | 7.381e-4 | 1.288e-3 |                         |       |       |       |    |    |    |   |   |   |   |  |
|               | AAL95559.1   Dipeptide transport ATP-binding protein dppF        |        |          |          |            |        |          |          |              |        |          |          |                |        |          |          |              |        |          |          |                |        |          |          |                         |       |       |       |    |    |    |   |   |   |   |  |
| <b>FN1364</b> | -1.345                                                           | 12.067 |          |          |            |        |          |          | -0.834       | 12.373 | 1.019e-3 | 2.451e-3 | 0.510          | 11.233 |          |          |              |        |          |          |                |        |          |          |                         |       |       |       |    |    |    |   |   |   |   |  |
|               | AAL95560.1   LSU ribosomal protein L32P                          |        |          |          |            |        |          |          |              |        |          |          |                |        |          |          |              |        |          |          |                |        |          |          |                         |       |       |       |    |    |    |   |   |   |   |  |

Show detected proteins only  
 Show all proteins

Filter by category:  
GO: amino acid transport

Proteins found: 1424

Enter (or paste) list of ORFs

Find ORFs

Test Cutoff

q-Value .005

p-Value

Dot Plots

Dot Plots

| Signif | Direction | Applies To   |
|--------|-----------|--------------|
| yes    | +         | ratios, bars |
| no     | n/a       | bars         |
| yes    | -         | ratios, bars |
| yes    | +         | p-, q-Values |
| yes    | -         | p-, q-Values |

FnPg vs Fn — █ — FnSg vs Fn

FnPgSg vs Fn — █ — FnPgSg vs FnPg

FnSg vs FnPg — █ — FnPgSg vs FnSg

Fn Summary Table

FnPg vs Fn

FnSg vs Fn

FnPgSg vs FnPg

FnPgSg vs FnPg

FnSg vs FnPg

FnPgSg vs FnSg

Fn Coverage

| ORF           | FnPg vs Fn                                          |        |          |          | FnSg vs Fn |        |          |          | FnPgSg vs FnPg |        |          |          | FnPgSg vs FnPg |        |          |          | FnSg vs FnPg |        |          |          | FnPgSg vs FnSg |        |          |          | Log <sub>2</sub> Ratios |     |       |       |    |    |    |   |   |   |   |  |
|---------------|-----------------------------------------------------|--------|----------|----------|------------|--------|----------|----------|----------------|--------|----------|----------|----------------|--------|----------|----------|--------------|--------|----------|----------|----------------|--------|----------|----------|-------------------------|-----|-------|-------|----|----|----|---|---|---|---|--|
|               | Ratio                                               | Sum    | q-Val    | p-Val    | Ratio      | Sum    | q-Val    | p-Val    | Ratio          | Sum    | q-Val    | p-Val    | Ratio          | Sum    | q-Val    | p-Val    | Ratio        | Sum    | q-Val    | p-Val    | Ratio          | Sum    | q-Val    | p-Val    | Ratio                   | Sum | q-Val | p-Val | -6 | -4 | -2 | 0 | 2 | 4 | 6 |  |
| <b>FN1365</b> | -0.595                                              | 14.347 | 8.129e-2 | 1.736e-1 | 0.155      | 15.281 | 6.373e-2 | 3.617e-1 | 0.213          | 14.951 | 5.136e-3 | 1.885e-2 | 0.808          | 14.560 | 4.973e-2 | 7.89e-2  | 0.750        | 14.686 | 1.07e-1  | 9.628e-2 | 0.059          | 15.494 | 1.367e-1 | 6.849e-1 |                         |     |       |       |    |    |    |   |   |   |   |  |
|               | AAL95561.1   GTP-binding protein                    |        |          |          |            |        |          |          |                |        |          |          |                |        |          |          |              |        |          |          |                |        |          |          |                         |     |       |       |    |    |    |   |   |   |   |  |
| <b>FN1366</b> | -0.402                                              | 15.015 | 2.211e-2 | 3.071e-2 | -0.778     | 14.823 | 8.148e-4 | 2.328e-3 | 0.931          | 16.145 | 5.722e-5 | 4.925e-5 | 1.333          | 15.947 | 1.247e-4 | 1.386e-5 | -0.376       | 14.422 | 1.007e-1 | 8.614e-2 | 1.709          | 15.755 | 1.438e-5 | 5.293e-6 |                         |     |       |       |    |    |    |   |   |   |   |  |
|               | AAL95562.1   Triosephosphate isomerase              |        |          |          |            |        |          |          |                |        |          |          |                |        |          |          |              |        |          |          |                |        |          |          |                         |     |       |       |    |    |    |   |   |   |   |  |
| <b>FN1368</b> |                                                     |        |          |          |            |        |          |          |                |        |          |          |                |        |          |          |              |        |          |          |                |        |          |          |                         |     |       |       |    |    |    |   |   |   |   |  |
|               | AAL95564.1   COMF operon protein 3                  |        |          |          |            |        |          |          |                |        |          |          |                |        |          |          |              |        |          |          |                |        |          |          |                         |     |       |       |    |    |    |   |   |   |   |  |
| <b>FN1371</b> |                                                     |        |          |          |            |        |          |          |                |        |          |          |                |        |          |          | 0.230        | 4.414  |          |          |                |        |          |          |                         |     |       |       |    |    |    |   |   |   |   |  |
|               | AAL95567.1   Ribonuclease HII                       |        |          |          |            |        |          |          |                |        |          |          |                |        |          |          |              |        |          |          |                |        |          |          |                         |     |       |       |    |    |    |   |   |   |   |  |
| <b>FN1373</b> |                                                     |        |          |          |            |        |          |          |                |        |          |          |                |        |          |          |              |        |          |          |                |        |          |          |                         |     |       |       |    |    |    |   |   |   |   |  |
|               | AAL95569.1   regulatory protein                     |        |          |          |            |        |          |          |                |        |          |          |                |        |          |          |              |        |          |          |                |        |          |          |                         |     |       |       |    |    |    |   |   |   |   |  |
| <b>FN1374</b> | -0.919                                              | 6.534  |          |          | -0.819     | 6.819  |          |          | -0.455         | 6.795  |          |          | 0.464          | 6.079  |          |          | 0.100        | 5.900  |          |          | 0.364          | 6.364  |          |          |                         |     |       |       |    |    |    |   |   |   |   |  |
|               | AAL95570.1   Transcriptional regulator              |        |          |          |            |        |          |          |                |        |          |          |                |        |          |          |              |        |          |          |                |        |          |          |                         |     |       |       |    |    |    |   |   |   |   |  |
| <b>FN1375</b> | 1.676                                               | 11.582 |          |          | 0.467      | 10.557 | 2.935e-2 | 1.562e-1 | -0.308         | 9.394  | 4.839e-3 | 1.754e-2 | -1.984         | 11.274 |          |          | -1.210       | 12.234 |          |          | -0.775         | 10.249 | 1.654e-2 | 6.324e-2 |                         |     |       |       |    |    |    |   |   |   |   |  |
|               | AAL95571.1   Citrate-sodium symport                 |        |          |          |            |        |          |          |                |        |          |          |                |        |          |          |              |        |          |          |                |        |          |          |                         |     |       |       |    |    |    |   |   |   |   |  |
| <b>FN1376</b> | -0.022                                              | 18.502 | 2.977e-1 | 9.453e-1 | 0.702      | 19.411 | 1.056e-2 | 4.97e-2  | -1.002         | 17.319 | 3.112e-4 | 5.309e-4 | -0.980         | 17.500 | 5.701e-2 | 9.735e-2 | 0.724        | 19.389 | 8.708e-2 | 6.465e-2 | -1.704         | 18.409 | 3.514e-3 | 9.385e-3 |                         |     |       |       |    |    |    |   |   |   |   |  |
|               | AAL95572.1   Oxaloacetate decarboxylase alpha chain |        |          |          |            |        |          |          |                |        |          |          |                |        |          |          |              |        |          |          |                |        |          |          |                         |     |       |       |    |    |    |   |   |   |   |  |
| <b>FN1377</b> |                                                     |        |          |          |            |        |          |          |                |        |          |          |                |        |          |          |              |        |          |          |                |        |          |          |                         |     |       |       |    |    |    |   |   |   |   |  |
|               | AAL95573.1   CITG protein                           |        |          |          |            |        |          |          |                |        |          |          |                |        |          |          |              |        |          |          |                |        |          |          |                         |     |       |       |    |    |    |   |   |   |   |  |
| <b>FN1378</b> | -0.796                                              | 9.834  | 7.855e-2 | 1.658e-1 | -0.568     | 10.247 |          |          | -0.500         | 9.927  | 1.515e-3 | 4.27e-3  | 0.296          | 9.334  | 2.048e-1 | 6.171e-1 | 0.229        | 9.451  |          |          | 0.068          | 9.747  |          |          |                         |     |       |       |    |    |    |   |   |   |   |  |
|               | AAL95574.1   Citrate lyase acyl carrier protein     |        |          |          |            |        |          |          |                |        |          |          |                |        |          |          |              |        |          |          |                |        |          |          |                         |     |       |       |    |    |    |   |   |   |   |  |
| <b>FN1379</b> | 0.395                                               | 15.728 | 2.098e-1 | 5.92e-1  | 0.954      | 16.471 | 1.937e-5 | 1.573e-5 | -0.144         | 14.985 | 3.171e-2 | 1.534e-1 | -0.539         | 15.584 | 1.748e-1 | 4.929e-1 | 0.559        | 16.866 | 2.039e-1 | 3.218e-1 | -1.098         | 16.327 | 2.599e-5 | 1.329e-5 |                         |     |       |       |    |    |    |   |   |   |   |  |
|               | AAL95575.1   Citrate lyase beta chain               |        |          |          |            |        |          |          |                |        |          |          |                |        |          |          |              |        |          |          |                |        |          |          |                         |     |       |       |    |    |    |   |   |   |   |  |
| <b>FN1380</b> | 0.460                                               | 17.821 | 2.113e-1 | 5.973e-1 | 0.865      | 18.410 | 1.552e-2 | 7.749e-2 | -0.006         | 17.151 | 1.519e-1 | 9.066e-1 | -0.467         | 17.815 | 1.994e-1 | 5.936e-1 | 0.404        | 18.871 | 3.009e-1 | 5.619e-1 | -0.871         | 18.404 | 1.935e-2 | 7.586e-2 |                         |     |       |       |    |    |    |   |   |   |   |  |
|               | AAL95576.1   Citrate lyase beta chain               |        |          |          |            |        |          |          |                |        |          |          |                |        |          |          |              |        |          |          |                |        |          |          |                         |     |       |       |    |    |    |   |   |   |   |  |
| <b>FN1381</b> |                                                     |        |          |          |            |        |          |          | -0.293         | 4.178  |          |          |                |        |          |          |              |        |          |          |                |        |          |          |                         |     |       |       |    |    |    |   |   |   |   |  |
|               | AAL95577.1   unknown                                |        |          |          |            |        |          |          |                |        |          |          |                |        |          |          |              |        |          |          |                |        |          |          |                         |     |       |       |    |    |    |   |   |   |   |  |
| <b>FN1382</b> |                                                     |        |          |          |            |        |          |          |                |        |          |          |                |        |          |          | -0.985       | 6.600  |          |          |                |        |          |          |                         |     |       |       |    |    |    |   |   |   |   |  |
|               | AAL95578.1   ATPase                                 |        |          |          |            |        |          |          |                |        |          |          |                |        |          |          |              |        |          |          |                |        |          |          |                         |     |       |       |    |    |    |   |   |   |   |  |
| <b>FN1383</b> |                                                     |        |          |          |            |        |          |          |                |        |          |          | -1.428         | 4.802  |          |          | 0.715        | 7.130  | 9.362e-2 | 7.579e-2 | -2.143         | 5.701  |          |          |                         |     |       |       |    |    |    |   |   |   |   |  |
|               | AAL95579.1   DNA polymerase III alpha subunit       |        |          |          |            |        |          |          |                |        |          |          |                |        |          |          |              |        |          |          |                |        |          |          |                         |     |       |       |    |    |    |   |   |   |   |  |
| <b>FN1385</b> | -1.567                                              | 4.737  |          |          | 0.228      | 6.718  | 1.125e-1 | 6.736e-1 |                |        |          |          |                |        |          |          | 1.796        | 5.150  |          |          |                |        |          |          |                         |     |       |       |    |    |    |   |   |   |   |  |
|               | AAL95581.1   Hypothetical protein                   |        |          |          |            |        |          |          |                |        |          |          |                |        |          |          |              |        |          |          |                |        |          |          |                         |     |       |       |    |    |    |   |   |   |   |  |
| <b>FN1386</b> | 0.648                                               | 6.271  |          |          | 1.846      | 7.654  | 2.145e-3 | 7.413e-3 | 1.058          | 6.478  | 6.956e-3 | 2.696e-2 | 0.411          | 7.330  |          |          | 1.199        | 8.302  |          |          | -0.788         | 8.713  | 1.139e-2 | 4.104e-2 |                         |     |       |       |    |    |    |   |   |   |   |  |
|               | AAL95582.1   SWF/SNF family helicase                |        |          |          |            |        |          |          |                |        |          |          |                |        |          |          |              |        |          |          |                |        |          |          |                         |     |       |       |    |    |    |   |   |   |   |  |

Show detected proteins only  
 Show all proteins  
 Filter by category:

Proteins found: 1424

Enter (or paste) list of ORFs

Find ORFs

Test Cutoff

q-Value p-Value

.005

Dot Plots

| Signif | Direction | Applies To   |
|--------|-----------|--------------|
| yes    | +         | ratios, bars |
| no     | n/a       | bars         |
| yes    | -         | ratios, bars |
| yes    | +         | p-, q-Values |
| yes    | -         | p-, q-Values |

FnPg vs Fn — — FnSg vs Fn  
 FnPgSg vs FnPg — — FnPgSg vs FnPg  
 FnSg vs FnPg — — FnPgSg vs FnSg



Fn Summary Table

FnPg vs Fn

FnSg vs Fn

FnPgSg vs Fn

FnPgSg vs FnPg

FnSg vs FnPg

FnPgSg vs FnSg

Fn Coverage

| ORF                                                         | FnPg vs Fn |        |          |          | FnSg vs Fn |        |          |           | FnPgSg vs Fn |        |          |          | FnPgSg vs FnPg |        |          |          | FnSg vs FnPg |        |          |          | FnPgSg vs FnSg |        |          |          | Log <sub>2</sub> Ratios |     |       |       |    |    |    |   |   |   |   |  |
|-------------------------------------------------------------|------------|--------|----------|----------|------------|--------|----------|-----------|--------------|--------|----------|----------|----------------|--------|----------|----------|--------------|--------|----------|----------|----------------|--------|----------|----------|-------------------------|-----|-------|-------|----|----|----|---|---|---|---|--|
|                                                             | Ratio      | Sum    | q-Val    | p-Val    | Ratio      | Sum    | q-Val    | p-Val     | Ratio        | Sum    | q-Val    | p-Val    | Ratio          | Sum    | q-Val    | p-Val    | Ratio        | Sum    | q-Val    | p-Val    | Ratio          | Sum    | q-Val    | p-Val    | Ratio                   | Sum | q-Val | p-Val | -6 | -4 | -2 | 0 | 2 | 4 | 6 |  |
| <b>FN1391</b>                                               | -1.043     | 12.722 | 2.913e-3 | 2.15e-3  | -1.705     | 12.244 | 3.054e-4 | 6.578e-4  | -1.264       | 12.297 | 8.207e-4 | 1.858e-3 | -0.221         | 11.457 | 1.331e-1 | 3.396e-1 | -0.662       | 11.201 | 7.426e-2 | 4.638e-2 | 0.441          | 10.980 | 2.531e-2 | 1.029e-1 |                         |     |       |       |    |    |    |   |   |   |   |  |
| AAL95584.1   Acetyltransferase                              |            |        |          |          |            |        |          |           |              |        |          |          |                |        |          |          |              |        |          |          |                |        |          |          |                         |     |       |       |    |    |    |   |   |   |   |  |
| <b>FN1392</b>                                               | -0.672     | 14.866 | 9.864e-2 | 2.232e-1 | -1.845     | 13.878 | 1.15e-8  | 1.589e-10 | -0.204       | 15.130 | 3.254e-3 | 1.087e-2 | 0.468          | 14.662 | 1.487e-1 | 3.967e-1 | -1.173       | 13.206 | 1.734e-1 | 2.466e-1 | 1.640          | 13.674 | 9.612e-5 | 8.249e-5 |                         |     |       |       |    |    |    |   |   |   |   |  |
| AAL95585.1   SSU ribosomal protein S16P                     |            |        |          |          |            |        |          |           |              |        |          |          |                |        |          |          |              |        |          |          |                |        |          |          |                         |     |       |       |    |    |    |   |   |   |   |  |
| <b>FN1393</b>                                               | -2.009     | 9.995  | 1.006e-3 | 4.741e-4 | -0.634     | 11.554 | 1.046e-3 | 3.141e-3  | -1.034       | 10.766 | 3.196e-4 | 5.504e-4 | 0.974          | 8.961  | 3.775e-2 | 5.309e-2 | 1.375        | 9.546  | 3.124e-2 | 9.79e-3  | -0.400         | 10.520 | 1.032e-2 | 3.637e-2 |                         |     |       |       |    |    |    |   |   |   |   |  |
| AAL95586.1   Signal recognition particle, subunit FFH/SRP54 |            |        |          |          |            |        |          |           |              |        |          |          |                |        |          |          |              |        |          |          |                |        |          |          |                         |     |       |       |    |    |    |   |   |   |   |  |
| <b>FN1397</b>                                               | -1.469     | 13.773 | 4.132e-3 | 3.477e-3 | -1.981     | 13.445 | 3.795e-6 | 1.258e-6  | -0.464       | 14.574 | 8.85e-3  | 3.573e-2 | 1.005          | 13.309 | 1.533e-2 | 1.465e-2 | -0.513       | 11.976 | 1.751e-1 | 2.505e-1 | 1.517          | 12.981 | 2.961e-3 | 7.552e-3 |                         |     |       |       |    |    |    |   |   |   |   |  |
| AAL95590.1   Glutaminase                                    |            |        |          |          |            |        |          |           |              |        |          |          |                |        |          |          |              |        |          |          |                |        |          |          |                         |     |       |       |    |    |    |   |   |   |   |  |
| <b>FN1398</b>                                               | -1.087     | 12.699 | 3.05e-2  | 4.617e-2 | -1.505     | 12.465 | 3.555e-3 | 1.391e-2  | 0.635        | 14.217 | 5.686e-3 | 2.129e-2 | 1.722          | 13.334 | 9.724e-3 | 7.22e-3  | -0.419       | 11.378 | 2.868e-1 | 5.25e-1  | 2.140          | 13.100 | 2.006e-7 | 1.127e-8 |                         |     |       |       |    |    |    |   |   |   |   |  |
| AAL95591.1   Amino acid carrier protein alST                |            |        |          |          |            |        |          |           |              |        |          |          |                |        |          |          |              |        |          |          |                |        |          |          |                         |     |       |       |    |    |    |   |   |   |   |  |
| <b>FN1399</b>                                               |            |        |          |          |            |        |          |           |              |        |          |          |                |        |          |          |              |        |          |          |                |        |          |          |                         |     |       |       |    |    |    |   |   |   |   |  |
| AAL95592.1   Hypothetical cytosolic protein                 |            |        |          |          |            |        |          |           |              |        |          |          |                |        |          |          |              |        |          |          |                |        |          |          |                         |     |       |       |    |    |    |   |   |   |   |  |
| <b>FN1400</b>                                               |            |        |          |          |            |        |          |           |              |        |          |          | 1.437          | 5.097  |          |          |              |        |          |          |                |        |          |          |                         |     |       |       |    |    |    |   |   |   |   |  |
| AAL95593.1   serine/threonine kinase                        |            |        |          |          |            |        |          |           |              |        |          |          |                |        |          |          |              |        |          |          |                |        |          |          |                         |     |       |       |    |    |    |   |   |   |   |  |
| <b>FN1406</b>                                               | 0.209      | 11.969 | 2.406e-1 | 7.065e-1 | 0.273      | 12.219 | 1.037e-2 | 4.869e-2  | -0.021       | 11.536 | 1.483e-1 | 8.813e-1 | -0.229         | 11.949 | 2.214e-1 | 6.816e-1 | 0.065        | 12.427 | 4.069e-1 | 8.956e-1 | -0.294         | 12.198 | 1.098e-2 | 3.923e-2 |                         |     |       |       |    |    |    |   |   |   |   |  |
| AAL95599.1   Histidine ammonia-lyase                        |            |        |          |          |            |        |          |           |              |        |          |          |                |        |          |          |              |        |          |          |                |        |          |          |                         |     |       |       |    |    |    |   |   |   |   |  |
| <b>FN1407</b>                                               | 1.487      | 8.513  |          |          | 1.445      | 8.655  | 9.711e-3 | 4.519e-2  | 0.617        | 7.439  | 6.913e-2 | 3.709e-1 | -0.870         | 9.130  |          |          | -0.042       | 10.142 |          |          | -0.828         | 9.272  | 3.635e-2 | 1.551e-1 |                         |     |       |       |    |    |    |   |   |   |   |  |
| AAL95600.1   Glutamate formiminotransferase                 |            |        |          |          |            |        |          |           |              |        |          |          |                |        |          |          |              |        |          |          |                |        |          |          |                         |     |       |       |    |    |    |   |   |   |   |  |
| <b>FN1411</b>                                               | 1.414      | 15.743 | 2.48e-2  | 3.551e-2 | 2.355      | 16.868 | 1.15e-8  | 1.52e-10  | 0.339        | 14.464 | 4.53e-2  | 2.315e-1 | -1.075         | 16.082 | 3.508e-2 | 4.799e-2 | 0.940        | 18.282 | 3.584e-2 | 1.251e-2 | -2.016         | 17.207 | 1.444e-4 | 1.406e-4 |                         |     |       |       |    |    |    |   |   |   |   |  |
| AAL95604.1   Threonine dehydratase                          |            |        |          |          |            |        |          |           |              |        |          |          |                |        |          |          |              |        |          |          |                |        |          |          |                         |     |       |       |    |    |    |   |   |   |   |  |
| <b>FN1412</b>                                               |            |        |          |          |            |        |          |           |              |        |          |          |                |        |          |          | -1.714       | 8.023  |          |          |                |        |          |          |                         |     |       |       |    |    |    |   |   |   |   |  |
| AAL95605.1   5-methylthioribose kinase                      |            |        |          |          |            |        |          |           |              |        |          |          |                |        |          |          |              |        |          |          |                |        |          |          |                         |     |       |       |    |    |    |   |   |   |   |  |
| <b>FN1413</b>                                               |            |        |          |          |            |        |          |           |              |        |          |          | -2.089         | 5.463  |          |          | -1.868       | 5.868  |          |          | -0.221         | 3.779  |          |          |                         |     |       |       |    |    |    |   |   |   |   |  |
| AAL95606.1   Translation initiation factor EIF-2B subunit 1 |            |        |          |          |            |        |          |           |              |        |          |          |                |        |          |          |              |        |          |          |                |        |          |          |                         |     |       |       |    |    |    |   |   |   |   |  |
| <b>FN1415</b>                                               |            |        |          |          |            |        |          |           |              |        |          |          |                |        |          |          | 0.144        | 7.257  |          |          |                |        |          |          |                         |     |       |       |    |    |    |   |   |   |   |  |
| AAL95608.1   NADH-dependent butanol dehydrogenase A         |            |        |          |          |            |        |          |           |              |        |          |          |                |        |          |          |              |        |          |          |                |        |          |          |                         |     |       |       |    |    |    |   |   |   |   |  |
| <b>FN1416</b>                                               |            |        |          |          |            |        |          |           |              |        |          |          | -2.338         | 6.832  |          |          | -2.677       | 6.677  |          |          | 0.339          | 4.339  |          |          |                         |     |       |       |    |    |    |   |   |   |   |  |
| AAL95609.1   Transcriptional regulator, GntR family         |            |        |          |          |            |        |          |           |              |        |          |          |                |        |          |          |              |        |          |          |                |        |          |          |                         |     |       |       |    |    |    |   |   |   |   |  |
| <b>FN1417</b>                                               | 1.041      | 5.824  |          |          | 0.839      | 5.807  |          |           | 0.032        | 4.612  |          |          | -1.009         | 5.856  |          |          | -0.201       | 6.848  | 2.65e-1  | 4.708e-1 | -0.807         | 5.839  |          |          |                         |     |       |       |    |    |    |   |   |   |   |  |
| AAL95610.1   L-fucose phosphate aldolase                    |            |        |          |          |            |        |          |           |              |        |          |          |                |        |          |          |              |        |          |          |                |        |          |          |                         |     |       |       |    |    |    |   |   |   |   |  |
| <b>FN1418</b>                                               | -0.352     | 4.431  |          |          | -0.696     | 4.271  |          |           |              |        |          |          |                |        |          |          | -0.344       | 3.919  |          |          |                |        |          |          |                         |     |       |       |    |    |    |   |   |   |   |  |
| AAL95611.1   Transcriptional regulator, GntR family         |            |        |          |          |            |        |          |           |              |        |          |          |                |        |          |          |              |        |          |          |                |        |          |          |                         |     |       |       |    |    |    |   |   |   |   |  |
| <b>FN1419</b>                                               | 3.256      | 21.695 | 2.928e-2 | 4.378e-2 | 2.422      | 21.045 | 1.67e-3  | 5.504e-3  | 2.033        | 20.268 | 1.133e-6 | 1.531e-7 | -1.223         | 23.727 | 6.688e-2 | 1.213e-1 | -0.834       | 24.301 | 1.532e-1 | 1.982e-1 | -0.389         | 23.078 | 3.057e-2 | 1.273e-1 |                         |     |       |       |    |    |    |   |   |   |   |  |
| AAL95612.1   Methionine gamma-lyase                         |            |        |          |          |            |        |          |           |              |        |          |          |                |        |          |          |              |        |          |          |                |        |          |          |                         |     |       |       |    |    |    |   |   |   |   |  |

Show detected proteins only  
 Show all proteins  
 Filter by category:

Proteins found: 1424

Enter (or paste) list of ORFs

Find ORFs

Test Cutoff

q-Value .005

p-Value

Dot Plots

| Signif | Direction | Applies To   |
|--------|-----------|--------------|
| yes    | +         | ratios, bars |
| no     | n/a       | bars         |
| yes    | -         | ratios, bars |
| yes    | +         | p-, q-Values |
| yes    | -         |              |

FnPg vs Fn — — FnSg vs Fn  
 FnPgSg vs Fn — — FnPgSg vs FnPg  
 FnSg vs FnPg — — FnPgSg vs FnSg



Fn Summary Table FnPg vs Fn FnSg vs Fn FnPgSg vs Fn FnPgSg vs FnPg FnSg vs FnPg FnPgSg vs FnSg Fn Coverage

| ORF                                                                                                                           | FnPg vs Fn |        |          |           | FnSg vs Fn |        |          |          | FnPgSg vs Fn |        |          |          | FnPgSg vs FnPg |        |          |          | FnSg vs FnPg |        |          |          | FnPgSg vs FnSg |        |          |          | Log <sub>2</sub> Ratios |     |       |       |    |    |    |   |   |   |   |  |
|-------------------------------------------------------------------------------------------------------------------------------|------------|--------|----------|-----------|------------|--------|----------|----------|--------------|--------|----------|----------|----------------|--------|----------|----------|--------------|--------|----------|----------|----------------|--------|----------|----------|-------------------------|-----|-------|-------|----|----|----|---|---|---|---|--|
|                                                                                                                               | Ratio      | Sum    | q-Val    | p-Val     | Ratio      | Sum    | q-Val    | p-Val    | Ratio        | Sum    | q-Val    | p-Val    | Ratio          | Sum    | q-Val    | p-Val    | Ratio        | Sum    | q-Val    | p-Val    | Ratio          | Sum    | q-Val    | p-Val    | Ratio                   | Sum | q-Val | p-Val | -6 | -4 | -2 | 0 | 2 | 4 | 6 |  |
| <b>FN1449</b>                                                                                                                 | -3.578     | 15.303 | 3.516e-7 | 7.114e-9  | -4.909     | 14.158 | 5.988e-6 | 2.575e-6 | -1.634       | 17.044 | 1.317e-4 | 1.608e-4 | 1.945          | 13.670 | 8.015e-3 | 5.339e-3 | -1.330       | 10.579 | 6.598e-2 | 3.709e-2 | 3.275          | 12.524 | 2.129e-3 | 4.994e-3 |                         |     |       |       |    |    |    |   |   |   |   |  |
| AAL95642.1   Fusobacterium outer membrane protein family                                                                      |            |        |          |           |            |        |          |          |              |        |          |          |                |        |          |          |              |        |          |          |                |        |          |          |                         |     |       |       |    |    |    |   |   |   |   |  |
| <b>FN1450</b>                                                                                                                 | -0.451     | 8.791  |          |           | 0.525      | 9.952  |          |          | -1.110       | 7.929  | 2.511e-7 | 1.888e-8 | -0.659         | 7.681  |          |          | 0.976        | 9.500  |          |          | -1.635         | 8.842  |          |          |                         |     |       |       |    |    |    |   |   |   |   |  |
| AAL95643.1   Integral membrane protein                                                                                        |            |        |          |           |            |        |          |          |              |        |          |          |                |        |          |          |              |        |          |          |                |        |          |          |                         |     |       |       |    |    |    |   |   |   |   |  |
| <b>FN1451</b>                                                                                                                 | -0.039     | 14.819 | 7.148e-2 | 1.465e-1  | 0.586      | 15.628 | 1.133e-4 | 1.837e-4 | -0.363       | 14.291 | 5.929e-3 | 2.236e-2 | -0.324         | 14.456 | 2.679e-2 | 3.221e-2 | 0.625        | 15.589 | 2.416e-3 | 1.684e-4 | -0.949         | 15.265 | 1.036e-4 | 9.063e-5 |                         |     |       |       |    |    |    |   |   |   |   |  |
| AAL95644.1   Cell division protein ftsZ                                                                                       |            |        |          |           |            |        |          |          |              |        |          |          |                |        |          |          |              |        |          |          |                |        |          |          |                         |     |       |       |    |    |    |   |   |   |   |  |
| <b>FN1452</b>                                                                                                                 | 0.036      | 13.611 | 2.74e-1  | 8.416e-1  | 0.362      | 14.120 | 6.061e-3 | 2.585e-2 | -0.615       | 12.755 | 3.825e-3 | 1.319e-2 | -0.652         | 12.996 | 1.991e-2 | 2.109e-2 | 0.325        | 14.157 | 8.838e-2 | 6.682e-2 | -0.977         | 13.505 | 2.168e-4 | 2.45e-4  |                         |     |       |       |    |    |    |   |   |   |   |  |
| AAL95645.1   Cell division protein ftsA                                                                                       |            |        |          |           |            |        |          |          |              |        |          |          |                |        |          |          |              |        |          |          |                |        |          |          |                         |     |       |       |    |    |    |   |   |   |   |  |
| <b>FN1454</b>                                                                                                                 | -0.702     | 9.486  |          |           | -0.589     | 9.784  | 4.074e-2 | 2.233e-1 | -0.302       | 9.682  | 5.884e-3 | 2.216e-2 | 0.400          | 9.184  |          |          | 0.113        | 9.082  |          |          | 0.287          | 9.481  | 1.131e-1 | 5.516e-1 |                         |     |       |       |    |    |    |   |   |   |   |  |
| AAL95647.1   D-alanine--D-alanine ligase                                                                                      |            |        |          |           |            |        |          |          |              |        |          |          |                |        |          |          |              |        |          |          |                |        |          |          |                         |     |       |       |    |    |    |   |   |   |   |  |
| <b>FN1455</b>                                                                                                                 | 0.157      | 8.630  | 1.9e-1   | 5.228e-1  | -0.013     | 8.644  | 1.432e-1 | 8.879e-1 | -0.511       | 7.759  | 2.654e-2 | 1.245e-1 | -0.668         | 8.119  | 5.658e-2 | 9.629e-2 | -0.170       | 8.801  | 2.695e-1 | 4.816e-1 | -0.498         | 8.134  | 3.193e-2 | 1.337e-1 |                         |     |       |       |    |    |    |   |   |   |   |  |
| AAL95648.1   UDP-N-acetylenolpyruvoylglucosamine reductase                                                                    |            |        |          |           |            |        |          |          |              |        |          |          |                |        |          |          |              |        |          |          |                |        |          |          |                         |     |       |       |    |    |    |   |   |   |   |  |
| <b>FN1456</b>                                                                                                                 | -0.507     | 11.985 | 4.608e-3 | 4.063e-3  | -0.316     | 12.360 | 2.725e-3 | 9.948e-3 | -0.648       | 11.640 | 7.203e-4 | 1.583e-3 | -0.141         | 11.337 | 1.179e-1 | 2.831e-1 | 0.191        | 11.853 | 6.143e-2 | 3.269e-2 | -0.332         | 11.712 | 1.046e-2 | 3.699e-2 |                         |     |       |       |    |    |    |   |   |   |   |  |
| AAL95649.1   UDP-N-acetylmuramate--alanine ligase                                                                             |            |        |          |           |            |        |          |          |              |        |          |          |                |        |          |          |              |        |          |          |                |        |          |          |                         |     |       |       |    |    |    |   |   |   |   |  |
| <b>FN1457</b>                                                                                                                 | -0.631     | 11.388 | 8.193e-2 | 1.755e-1  | -0.428     | 11.775 | 2.24e-2  | 1.161e-1 | -1.513       | 10.302 | 3.401e-6 | 6.872e-7 | -0.882         | 9.875  | 1.051e-1 | 2.38e-1  | 0.203        | 11.144 | 3.468e-1 | 6.931e-1 | -1.085         | 10.262 | 1.183e-2 | 4.286e-2 |                         |     |       |       |    |    |    |   |   |   |   |  |
| AAL95650.1   UDP-N-acetylglucosamine-N-acetylmuramyl-Pentapeptide pyrophosphoryl-undecaprenol N-acetylglucosamine transferase |            |        |          |           |            |        |          |          |              |        |          |          |                |        |          |          |              |        |          |          |                |        |          |          |                         |     |       |       |    |    |    |   |   |   |   |  |
| <b>FN1458</b>                                                                                                                 | 0.050      | 12.577 | 2.882e-1 | 9.029e-1  | -0.350     | 12.361 | 2.451e-2 | 1.28e-1  | -0.832       | 11.491 | 4.331e-5 | 3.325e-5 | -0.882         | 11.745 | 8.629e-2 | 1.743e-1 | -0.401       | 12.411 | 2.487e-1 | 4.318e-1 | -0.481         | 11.529 | 2.93e-2  | 1.213e-1 |                         |     |       |       |    |    |    |   |   |   |   |  |
| AAL95651.1   UDP-N-acetylmuramoylalanine--D-glutamate ligase                                                                  |            |        |          |           |            |        |          |          |              |        |          |          |                |        |          |          |              |        |          |          |                |        |          |          |                         |     |       |       |    |    |    |   |   |   |   |  |
| <b>FN1459</b>                                                                                                                 |            |        |          |           |            |        |          |          |              |        |          |          |                |        |          |          |              |        |          |          |                |        |          |          |                         |     |       |       |    |    |    |   |   |   |   |  |
| AAL95652.1   Phospho-N-acetylmuramoyl-pentapeptide-transferase                                                                |            |        |          |           |            |        |          |          |              |        |          |          |                |        |          |          |              |        |          |          |                |        |          |          |                         |     |       |       |    |    |    |   |   |   |   |  |
| <b>FN1461</b>                                                                                                                 | -0.759     | 10.290 | 5.368e-8 | 4.345e-10 | -1.210     | 10.023 | 5.029e-3 | 2.083e-2 | -1.278       | 9.567  | 2.113e-4 | 3.16e-4  | -0.519         | 9.012  | 1.223e-2 | 1.024e-2 | -0.451       | 9.264  | 1.945e-1 | 2.999e-1 | -0.068         | 8.745  | 1.704e-1 | 8.883e-1 |                         |     |       |       |    |    |    |   |   |   |   |  |
| AAL95654.1   Histidinol-phosphatase                                                                                           |            |        |          |           |            |        |          |          |              |        |          |          |                |        |          |          |              |        |          |          |                |        |          |          |                         |     |       |       |    |    |    |   |   |   |   |  |
| <b>FN1462</b>                                                                                                                 |            |        |          |           |            |        |          |          |              |        |          |          |                |        |          |          |              |        |          |          |                |        |          |          |                         |     |       |       |    |    |    |   |   |   |   |  |
| AAL95655.1   Transcriptional regulator, GntR family                                                                           |            |        |          |           |            |        |          |          |              |        |          |          |                |        |          |          |              |        |          |          |                |        |          |          |                         |     |       |       |    |    |    |   |   |   |   |  |
| <b>FN1463</b>                                                                                                                 | 0.182      | 16.609 | 1.215e-1 | 2.9e-1    | 0.404      | 17.015 | 5.54e-5  | 7.014e-5 | 0.642        | 16.865 | 5.185e-5 | 4.321e-5 | 0.460          | 17.251 | 2.016e-2 | 2.146e-2 | 0.222        | 17.197 | 1.422e-1 | 1.686e-1 | 0.238          | 17.657 | 9.733e-4 | 1.869e-3 |                         |     |       |       |    |    |    |   |   |   |   |  |
| AAL95656.1   pyridoxine biosynthesis protein                                                                                  |            |        |          |           |            |        |          |          |              |        |          |          |                |        |          |          |              |        |          |          |                |        |          |          |                         |     |       |       |    |    |    |   |   |   |   |  |
| <b>FN1464</b>                                                                                                                 | -0.124     | 15.788 | 2.528e-1 | 7.543e-1  | 0.524      | 16.620 | 6.288e-5 | 8.419e-5 | -0.738       | 14.970 | 2.936e-4 | 4.909e-4 | -0.614         | 15.050 | 1.163e-1 | 2.776e-1 | 0.648        | 16.496 | 1.192e-1 | 1.179e-1 | -1.262         | 15.882 | 8.35e-6  | 2.115e-6 |                         |     |       |       |    |    |    |   |   |   |   |  |
| AAL95657.1   1-deoxyxylulose-5-phosphate synthase                                                                             |            |        |          |           |            |        |          |          |              |        |          |          |                |        |          |          |              |        |          |          |                |        |          |          |                         |     |       |       |    |    |    |   |   |   |   |  |
| <b>FN1470</b>                                                                                                                 | -2.269     | 10.228 | 3.663e-4 | 9.386e-5  | -4.032     | 8.649  | 2.359e-4 | 4.691e-4 | -0.032       | 12.261 | 1.353e-1 | 7.919e-1 | 2.237          | 10.196 | 2.787e-4 | 3.797e-5 | -1.764       | 6.380  | 5.236e-2 | 2.485e-2 | 4.001          | 8.617  | 2.536e-4 | 3.074e-4 |                         |     |       |       |    |    |    |   |   |   |   |  |
| AAL95663.1   Hypothetical protein                                                                                             |            |        |          |           |            |        |          |          |              |        |          |          |                |        |          |          |              |        |          |          |                |        |          |          |                         |     |       |       |    |    |    |   |   |   |   |  |
| <b>FN1471</b>                                                                                                                 |            |        |          |           | -1.987     | 5.952  | 7.154e-3 | 3.152e-2 | -1.454       | 6.098  |          |          |                |        |          |          |              |        |          |          | 0.533          | 4.499  |          |          |                         |     |       |       |    |    |    |   |   |   |   |  |
| AAL95664.1   LACI-family transcription regulator                                                                              |            |        |          |           |            |        |          |          |              |        |          |          |                |        |          |          |              |        |          |          |                |        |          |          |                         |     |       |       |    |    |    |   |   |   |   |  |
| <b>FN1472</b>                                                                                                                 | -3.274     | 12.762 | 4.674e-4 | 1.384e-4  | -3.429     | 12.792 | 4.04e-4  | 9.34e-4  | -1.228       | 14.605 | 1.337e-3 | 3.577e-3 | 2.046          | 11.534 | 5.896e-3 | 3.207e-3 | -0.154       | 9.518  | 3.807e-1 | 8.026e-1 | 2.200          | 11.564 | 1.217e-7 | 4.607e-9 |                         |     |       |       |    |    |    |   |   |   |   |  |
| AAL95665.1   N-acetylneuraminate-binding protein                                                                              |            |        |          |           |            |        |          |          |              |        |          |          |                |        |          |          |              |        |          |          |                |        |          |          |                         |     |       |       |    |    |    |   |   |   |   |  |

Show detected proteins only  
 Show all proteins  
 Filter by category:

Proteins found: 1424

Test Cutoff

| Signif | Direction | Applies To   |
|--------|-----------|--------------|
| yes    | +         | ratios, bars |
| no     | n/a       | bars         |
| yes    | -         | ratios, bars |
| yes    | +         | p-, q-Values |
| yes    | -         | p-, q-Values |

FnPg vs Fn █ █

FnPgSg vs Fn █ █

FnSg vs FnPg █ █

FnPgSg vs FnSg █ █

Fn Summary Table

FnPg vs Fn

FnSg vs Fn

FnPgSg vs FnPg

FnPgSg vs FnPg

FnSg vs FnPg

FnPgSg vs FnSg

Fn Coverage

| ORF           | FnPg vs Fn                                                            |        |          |          | FnSg vs Fn |        |          |          | FnPgSg vs FnPg |        |          |          | FnPgSg vs FnPg |        |          |          | FnSg vs FnPg |        |          |          | FnPgSg vs FnSg |        |          |          | Log <sub>2</sub> Ratios |     |       |       |    |    |    |   |   |   |   |
|---------------|-----------------------------------------------------------------------|--------|----------|----------|------------|--------|----------|----------|----------------|--------|----------|----------|----------------|--------|----------|----------|--------------|--------|----------|----------|----------------|--------|----------|----------|-------------------------|-----|-------|-------|----|----|----|---|---|---|---|
|               | Ratio                                                                 | Sum    | q-Val    | p-Val    | Ratio      | Sum    | q-Val    | p-Val    | Ratio          | Sum    | q-Val    | p-Val    | Ratio          | Sum    | q-Val    | p-Val    | Ratio        | Sum    | q-Val    | p-Val    | Ratio          | Sum    | q-Val    | p-Val    | Ratio                   | Sum | q-Val | p-Val | -6 | -4 | -2 | 0 | 2 | 4 | 6 |
| <b>FN1474</b> | AAL95667.1   N-acetylmannosamine kinase                               |        |          |          |            |        |          |          |                |        |          |          |                |        |          |          |              |        |          |          |                |        |          |          |                         |     |       |       |    |    |    |   |   |   |   |
| <b>FN1475</b> | -1.481                                                                | 9.773  | 5.317e-3 | 4.94e-3  | -2.397     | 9.041  |          |          | 0.996          | 12.046 | 9.879e-4 | 2.354e-3 | 2.477          | 10.769 | 6.392e-4 | 1.253e-4 | -0.916       | 7.560  |          |          | 3.394          | 10.037 |          |          |                         |     |       |       |    |    |    |   |   |   |   |
|               | AAL95668.1   N-acetylneuraminate lyase                                |        |          |          |            |        |          |          |                |        |          |          |                |        |          |          |              |        |          |          |                |        |          |          |                         |     |       |       |    |    |    |   |   |   |   |
| <b>FN1476</b> |                                                                       |        |          |          |            |        |          |          | -0.949         | 7.937  | 1.144e-7 | 4.624e-9 |                |        |          |          |              |        |          |          |                |        |          |          |                         |     |       |       |    |    |    |   |   |   |   |
|               | AAL95669.1   N-acetylmannosamine-6-phosphate 2-epimerase              |        |          |          |            |        |          |          |                |        |          |          |                |        |          |          |              |        |          |          |                |        |          |          |                         |     |       |       |    |    |    |   |   |   |   |
| <b>FN1478</b> |                                                                       |        |          |          |            |        |          |          | -0.894         | 8.153  |          |          |                |        |          |          | -0.235       | 8.996  |          |          | -0.659         | 8.102  |          |          |                         |     |       |       |    |    |    |   |   |   |   |
|               | AAL95671.1   Hypothetical protein                                     |        |          |          |            |        |          |          |                |        |          |          |                |        |          |          |              |        |          |          |                |        |          |          |                         |     |       |       |    |    |    |   |   |   |   |
| <b>FN1479</b> | -0.899                                                                | 9.593  | 1.151e-2 | 1.341e-2 | -0.758     | 9.918  | 2.551e-4 | 5.183e-4 | -0.809         | 9.479  | 2.012e-3 | 6.102e-3 | 0.090          | 8.784  | 2.494e-1 | 7.965e-1 | 0.140        | 9.019  | 3.305e-1 | 6.446e-1 | -0.050         | 9.109  | 1.613e-1 | 8.319e-1 |                         |     |       |       |    |    |    |   |   |   |   |
|               | AAL95672.1   Hypothetical protein                                     |        |          |          |            |        |          |          |                |        |          |          |                |        |          |          |              |        |          |          |                |        |          |          |                         |     |       |       |    |    |    |   |   |   |   |
| <b>FN1480</b> | -0.025                                                                | 8.554  | 2.755e-1 | 8.479e-1 | 0.738      | 9.502  | 6.281e-4 | 1.649e-3 | -1.505         | 6.871  | 1.481e-3 | 4.139e-3 | -1.480         | 7.050  | 3.565e-3 | 1.595e-3 | 0.763        | 9.477  | 5.914e-3 | 7.434e-4 | -2.243         | 7.997  | 3.816e-5 | 2.332e-5 |                         |     |       |       |    |    |    |   |   |   |   |
|               | AAL95673.1   MG2+ transporter MGTE                                    |        |          |          |            |        |          |          |                |        |          |          |                |        |          |          |              |        |          |          |                |        |          |          |                         |     |       |       |    |    |    |   |   |   |   |
| <b>FN1481</b> | 0.921                                                                 | 6.728  | 7.301e-3 | 7.657e-3 | 0.319      | 6.311  | 1.055e-1 | 6.27e-1  | -0.802         | 4.802  |          |          | -1.722         | 5.926  |          |          | -0.602       | 7.232  | 1.709e-1 | 2.403e-1 | -1.121         | 5.509  |          |          |                         |     |       |       |    |    |    |   |   |   |   |
|               | AAL95674.1   Queuine tRNA-ribosyltransferase                          |        |          |          |            |        |          |          |                |        |          |          |                |        |          |          |              |        |          |          |                |        |          |          |                         |     |       |       |    |    |    |   |   |   |   |
| <b>FN1482</b> | -0.212                                                                | 11.556 | 1.174e-1 | 2.775e-1 | 0.667      | 12.619 | 3.33e-3  | 1.279e-2 | -1.728         | 9.836  | 1.616e-3 | 4.647e-3 | -1.516         | 9.828  | 1.034e-4 | 8.913e-6 | 0.879        | 12.407 | 3.005e-2 | 9.148e-3 | -2.395         | 10.891 | 8.523e-4 | 1.576e-3 |                         |     |       |       |    |    |    |   |   |   |   |
|               | AAL95675.1   Guanosine-3',5'-bis(Diphosphate) 3'-pyrophosphohydrolase |        |          |          |            |        |          |          |                |        |          |          |                |        |          |          |              |        |          |          |                |        |          |          |                         |     |       |       |    |    |    |   |   |   |   |
| <b>FN1483</b> | -0.713                                                                | 10.454 | 9.174e-4 | 4.111e-4 | -1.057     | 10.294 | 1.05e-4  | 1.663e-4 | 0.263          | 11.227 | 1.932e-3 | 5.818e-3 | 0.976          | 10.717 | 9.76e-5  | 7.935e-6 | -0.344       | 9.581  | 4.053e-2 | 1.54e-2  | 1.321          | 10.557 | 9.241e-6 | 2.527e-6 |                         |     |       |       |    |    |    |   |   |   |   |
|               | AAL95676.1   Adenine phosphoribosyltransferase                        |        |          |          |            |        |          |          |                |        |          |          |                |        |          |          |              |        |          |          |                |        |          |          |                         |     |       |       |    |    |    |   |   |   |   |
| <b>FN1484</b> |                                                                       |        |          |          | -0.972     | 6.825  | 5.444e-3 | 2.281e-2 | -0.856         | 6.553  | 8.42e-3  | 3.369e-2 |                |        |          |          |              |        |          |          | 0.116          | 5.969  | 1.375e-1 | 6.898e-1 |                         |     |       |       |    |    |    |   |   |   |   |
|               | AAL95677.1   Tetratricopeptide repeat family protein                  |        |          |          |            |        |          |          |                |        |          |          |                |        |          |          |              |        |          |          |                |        |          |          |                         |     |       |       |    |    |    |   |   |   |   |
| <b>FN1485</b> |                                                                       |        |          |          |            |        |          |          |                |        |          |          |                |        |          |          |              |        |          |          |                |        |          |          |                         |     |       |       |    |    |    |   |   |   |   |
|               | AAL95678.1   Transporter                                              |        |          |          |            |        |          |          |                |        |          |          |                |        |          |          |              |        |          |          |                |        |          |          |                         |     |       |       |    |    |    |   |   |   |   |
| <b>FN1486</b> |                                                                       |        |          |          | -0.572     | 5.216  |          |          | -0.555         | 4.844  | 4.252e-3 | 1.502e-2 |                |        |          |          |              |        |          |          | 0.017          | 4.661  |          |          |                         |     |       |       |    |    |    |   |   |   |   |
|               | AAL95679.1   magnesium and cobalt efflux protein CorC                 |        |          |          |            |        |          |          |                |        |          |          |                |        |          |          |              |        |          |          |                |        |          |          |                         |     |       |       |    |    |    |   |   |   |   |
| <b>FN1487</b> | -1.415                                                                | 14.595 | 4.163e-3 | 3.513e-3 | -0.972     | 15.222 | 1.898e-6 | 4.186e-7 | -0.519         | 15.287 | 6.114e-3 | 2.319e-2 | 0.896          | 14.076 | 2.117e-2 | 2.301e-2 | 0.443        | 13.807 | 1.471e-1 | 1.82e-1  | 0.453          | 14.703 | 2.011e-2 | 7.932e-2 |                         |     |       |       |    |    |    |   |   |   |   |
|               | AAL95681.1   Chorismate mutase                                        |        |          |          |            |        |          |          |                |        |          |          |                |        |          |          |              |        |          |          |                |        |          |          |                         |     |       |       |    |    |    |   |   |   |   |
| <b>FN1488</b> |                                                                       |        |          |          |            |        |          |          |                |        |          |          | -0.722         | 8.073  | 9.775e-2 | 2.114e-1 | -0.402       | 8.577  |          |          | -0.320         | 7.855  |          |          |                         |     |       |       |    |    |    |   |   |   |   |
|               | AAL95682.1   Methylenetetrahydrofolate dehydrogenase (NADP+)          |        |          |          |            |        |          |          |                |        |          |          |                |        |          |          |              |        |          |          |                |        |          |          |                         |     |       |       |    |    |    |   |   |   |   |
| <b>FN1489</b> | -0.585                                                                | 9.086  | 2.168e-2 | 2.997e-2 | -0.369     | 9.486  | 1.483e-2 | 7.364e-2 | -1.776         | 7.690  | 5.003e-4 | 1.001e-3 | -1.192         | 7.310  | 1.698e-2 | 1.695e-2 | 0.216        | 8.901  | 1.864e-1 | 2.785e-1 | -1.407         | 7.710  | 2.615e-3 | 6.485e-3 |                         |     |       |       |    |    |    |   |   |   |   |
|               | AAL95683.1   Methionyl-tRNA formyltransferase                         |        |          |          |            |        |          |          |                |        |          |          |                |        |          |          |              |        |          |          |                |        |          |          |                         |     |       |       |    |    |    |   |   |   |   |
| <b>FN1490</b> | 0.744                                                                 | 7.459  | 5.827e-2 | 1.111e-1 | 1.571      | 8.471  | 6.866e-3 | 2.999e-2 | -0.449         | 6.063  |          |          | -1.192         | 7.011  |          |          | 0.828        | 9.215  | 1.076e-1 | 9.738e-2 | -2.020         | 8.023  |          |          |                         |     |       |       |    |    |    |   |   |   |   |
|               | AAL95684.1   putative regulatory protein                              |        |          |          |            |        |          |          |                |        |          |          |                |        |          |          |              |        |          |          |                |        |          |          |                         |     |       |       |    |    |    |   |   |   |   |
| <b>FN1491</b> | -1.070                                                                | 7.713  |          |          | -0.293     | 8.675  |          |          |                |        |          |          |                |        |          |          | 0.777        | 7.605  |          |          |                |        |          |          |                         |     |       |       |    |    |    |   |   |   |   |
|               | AAL95685.1   PTS system, IIA component                                |        |          |          |            |        |          |          |                |        |          |          |                |        |          |          |              |        |          |          |                |        |          |          |                         |     |       |       |    |    |    |   |   |   |   |

Show detected proteins only  
 Show all proteins  
 Filter by category:

Proteins found: 1424

Enter (or paste) list of ORFs

Find ORFs

Test Cutoff

q-Value .005

p-Value

Dot Plots

| Signif | Direction | Applies To   |
|--------|-----------|--------------|
| yes    | +         | ratios, bars |
| no     | n/a       | bars         |
| yes    | -         | ratios, bars |
| yes    | +         | p-, q-Values |
| yes    | -         | p-, q-Values |

FnPg vs Fn — █ — FnSg vs Fn  
 FnPgSg vs FnPg — █ — FnPgSg vs FnPg  
 FnSg vs FnPg — █ — FnPgSg vs FnSg

Fn Summary Table

FnPg vs Fn

FnSg vs Fn

FnPgSg vs Fn

FnPgSg vs FnPg

FnSg vs FnPg

FnPgSg vs FnSg

Fn Coverage

| ORF           | FnPg vs Fn                                                         |        |          |          | FnSg vs Fn |        |          |          | FnPgSg vs Fn |        |          |          | FnPgSg vs FnPg |        |          |          | FnSg vs FnPg |        |          |          | FnPgSg vs FnSg |        |          |          | Log <sub>2</sub> Ratios |     |       |       |    |    |    |   |   |   |   |  |
|---------------|--------------------------------------------------------------------|--------|----------|----------|------------|--------|----------|----------|--------------|--------|----------|----------|----------------|--------|----------|----------|--------------|--------|----------|----------|----------------|--------|----------|----------|-------------------------|-----|-------|-------|----|----|----|---|---|---|---|--|
|               | Ratio                                                              | Sum    | q-Val    | p-Val    | Ratio      | Sum    | q-Val    | p-Val    | Ratio        | Sum    | q-Val    | p-Val    | Ratio          | Sum    | q-Val    | p-Val    | Ratio        | Sum    | q-Val    | p-Val    | Ratio          | Sum    | q-Val    | p-Val    | Ratio                   | Sum | q-Val | p-Val | -6 | -4 | -2 | 0 | 2 | 4 | 6 |  |
| <b>FN1492</b> | AAL95686.1   DNA repair protein recO                               |        |          |          |            |        |          |          |              |        |          |          |                |        |          |          |              |        |          |          |                |        |          |          |                         |     |       |       |    |    |    |   |   |   |   |  |
| <b>FN1493</b> | -1.101                                                             | 7.965  | 1.442e-2 | 1.768e-2 | -2.101     | 7.150  | 2.027e-3 | 6.924e-3 |              |        |          |          |                |        |          |          | -1.000       | 6.049  | 8.03e-3  | 1.268e-3 |                |        |          |          |                         |     |       |       |    |    |    |   |   |   |   |  |
|               | AAL95687.1   Hypothetical protein                                  |        |          |          |            |        |          |          |              |        |          |          |                |        |          |          |              |        |          |          |                |        |          |          |                         |     |       |       |    |    |    |   |   |   |   |  |
| <b>FN1494</b> | -1.569                                                             | 8.212  |          |          | -1.536     | 8.430  | 4.557e-4 | 1.088e-3 | -1.044       | 8.533  | 8.809e-7 | 1.048e-7 | 0.525          | 7.169  |          |          | 0.033        | 6.861  |          |          | 0.492          | 7.386  | 2.162e-2 | 8.641e-2 |                         |     |       |       |    |    |    |   |   |   |   |  |
|               | AAL95680.1   Rod shape-determining protein mreC                    |        |          |          |            |        |          |          |              |        |          |          |                |        |          |          |              |        |          |          |                |        |          |          |                         |     |       |       |    |    |    |   |   |   |   |  |
| <b>FN1496</b> | -1.569                                                             | 8.212  |          |          | -1.536     | 8.430  | 4.557e-4 | 1.088e-3 | -1.044       | 8.533  | 8.809e-7 | 1.048e-7 | 0.525          | 7.169  |          |          | 0.033        | 6.861  |          |          | 0.492          | 7.386  | 2.162e-2 | 8.641e-2 |                         |     |       |       |    |    |    |   |   |   |   |  |
|               | AAL95680.1   Rod shape-determining protein mreC                    |        |          |          |            |        |          |          |              |        |          |          |                |        |          |          |              |        |          |          |                |        |          |          |                         |     |       |       |    |    |    |   |   |   |   |  |
| <b>FN1499</b> | -0.356                                                             | 11.888 | 1.919e-1 | 5.294e-1 | -1.628     | 10.800 | 8.446e-4 | 2.429e-3 | 0.793        | 12.833 | 1.634e-3 | 4.711e-3 | 1.149          | 12.680 | 3.316e-2 | 4.413e-2 | -1.272       | 10.444 | 1.659e-1 | 2.285e-1 | 2.421          | 11.593 | 8.024e-4 | 1.446e-3 |                         |     |       |       |    |    |    |   |   |   |   |  |
|               | AAL93625.1   Cell surface protein                                  |        |          |          |            |        |          |          |              |        |          |          |                |        |          |          |              |        |          |          |                |        |          |          |                         |     |       |       |    |    |    |   |   |   |   |  |
| <b>FN1501</b> | AAL93627.1   Nickel transport ATP-binding protein nikD             |        |          |          |            |        |          |          |              |        |          |          |                |        |          |          |              |        |          |          |                |        |          |          |                         |     |       |       |    |    |    |   |   |   |   |  |
| <b>FN1504</b> | -1.567                                                             | 13.803 | 5.632e-5 | 5.926e-6 | -0.873     | 14.681 | 3.772e-3 | 1.5e-2   | -0.874       | 14.292 | 9.725e-5 | 1.044e-4 | 0.693          | 12.929 | 7.972e-3 | 5.287e-3 | 0.694        | 13.114 | 1.224e-1 | 1.242e-1 | -0.001         | 13.807 | 1.875e-1 | 9.983e-1 |                         |     |       |       |    |    |    |   |   |   |   |  |
|               | AAL93630.1   Nickel-binding protein                                |        |          |          |            |        |          |          |              |        |          |          |                |        |          |          |              |        |          |          |                |        |          |          |                         |     |       |       |    |    |    |   |   |   |   |  |
| <b>FN1505</b> | -0.020                                                             | 16.220 | 2.836e-1 | 8.827e-1 | -0.463     | 15.961 | 1.136e-3 | 3.469e-3 | -0.776       | 15.260 | 2.495e-4 | 3.975e-4 | -0.756         | 15.444 | 1.474e-2 | 1.372e-2 | -0.443       | 15.941 | 6.778e-2 | 3.897e-2 | -0.313         | 15.185 | 1.25e-2  | 4.571e-2 |                         |     |       |       |    |    |    |   |   |   |   |  |
|               | AAL93631.1   6,7-dimethyl-8-ribityllumazine synthase               |        |          |          |            |        |          |          |              |        |          |          |                |        |          |          |              |        |          |          |                |        |          |          |                         |     |       |       |    |    |    |   |   |   |   |  |
| <b>FN1506</b> | 0.684                                                              | 7.889  |          |          | -0.525     | 6.865  |          |          | 0.717        | 7.719  |          |          | 0.033          | 8.606  | 2.755e-1 | 9.117e-1 | -1.209       | 7.549  |          |          | 1.242          | 7.582  |          |          |                         |     |       |       |    |    |    |   |   |   |   |  |
|               | AAL93632.1   Diaminohydroxyphosphoribosylaminopyrimidine deaminase |        |          |          |            |        |          |          |              |        |          |          |                |        |          |          |              |        |          |          |                |        |          |          |                         |     |       |       |    |    |    |   |   |   |   |  |
| <b>FN1507</b> | AAL93633.1   Riboflavin synthase alpha chain                       |        |          |          |            |        |          |          |              |        |          |          |                |        |          |          |              |        |          |          |                |        |          |          |                         |     |       |       |    |    |    |   |   |   |   |  |
| <b>FN1508</b> | 0.227                                                              | 13.127 | 1.712e-1 | 4.533e-1 | -0.566     | 12.519 | 1.493e-2 | 7.418e-2 | 0.624        | 13.320 | 1.54e-4  | 1.998e-4 | 0.397          | 13.751 | 7.947e-2 | 1.544e-1 | -0.792       | 12.746 | 1.003e-1 | 8.55e-2  | 1.190          | 13.143 | 2.274e-3 | 5.431e-3 |                         |     |       |       |    |    |    |   |   |   |   |  |
|               | AAL93634.1   GTP cyclohydrolase II                                 |        |          |          |            |        |          |          |              |        |          |          |                |        |          |          |              |        |          |          |                |        |          |          |                         |     |       |       |    |    |    |   |   |   |   |  |
| <b>FN1512</b> |                                                                    |        |          |          |            |        |          |          | -1.700       | 5.249  | 5.512e-4 | 1.129e-3 |                |        |          |          |              |        |          |          |                |        |          |          |                         |     |       |       |    |    |    |   |   |   |   |  |
|               | AAL93638.1   hypothetical exported 24-amino acid repeat protein    |        |          |          |            |        |          |          |              |        |          |          |                |        |          |          |              |        |          |          |                |        |          |          |                         |     |       |       |    |    |    |   |   |   |   |  |
| <b>FN1517</b> | -0.545                                                             | 15.824 | 4.167e-2 | 6.973e-2 | -0.956     | 15.597 | 5.742e-4 | 1.469e-3 | -0.240       | 15.926 | 1.464e-2 | 6.337e-2 | 0.306          | 15.584 | 1.128e-1 | 2.654e-1 | -0.411       | 15.052 | 1.736e-1 | 2.47e-1  | 0.717          | 15.358 | 4.067e-5 | 2.59e-5  |                         |     |       |       |    |    |    |   |   |   |   |  |
|               | AAL93643.1   Leucyl-tRNA synthetase                                |        |          |          |            |        |          |          |              |        |          |          |                |        |          |          |              |        |          |          |                |        |          |          |                         |     |       |       |    |    |    |   |   |   |   |  |
| <b>FN1518</b> |                                                                    |        |          |          | -0.740     | 5.910  |          |          |              |        |          |          |                |        |          |          |              |        |          |          |                |        |          |          |                         |     |       |       |    |    |    |   |   |   |   |  |
|               | AAL93644.1   RNA polymerase sigma-H factor                         |        |          |          |            |        |          |          |              |        |          |          |                |        |          |          |              |        |          |          |                |        |          |          |                         |     |       |       |    |    |    |   |   |   |   |  |
| <b>FN1519</b> | -0.956                                                             | 8.357  |          |          | -0.504     | 8.993  | 1.798e-3 | 6.002e-3 | -0.052       | 9.057  | 8.335e-2 | 4.58e-1  | 0.904          | 8.305  |          |          | 0.452        | 8.038  |          |          | 0.452          | 8.942  | 2.137e-3 | 5.019e-3 |                         |     |       |       |    |    |    |   |   |   |   |  |
|               | AAL93645.1   23S rRNA methyltransferase                            |        |          |          |            |        |          |          |              |        |          |          |                |        |          |          |              |        |          |          |                |        |          |          |                         |     |       |       |    |    |    |   |   |   |   |  |
| <b>FN1520</b> | -1.151                                                             | 10.981 | 2.418e-2 | 3.44e-2  | -1.051     | 11.266 | 4.193e-5 | 4.721e-5 | 0.821        | 12.750 | 1.369e-3 | 3.704e-3 | 1.973          | 11.802 | 1.938e-3 | 6.702e-4 | 0.100        | 10.114 | 3.942e-1 | 8.496e-1 | 1.873          | 12.087 | 3.96e-4  | 5.496e-4 |                         |     |       |       |    |    |    |   |   |   |   |  |
|               | AAL93646.1   UDP-N-acetylglucosamine 1-carboxyvinyltransferase     |        |          |          |            |        |          |          |              |        |          |          |                |        |          |          |              |        |          |          |                |        |          |          |                         |     |       |       |    |    |    |   |   |   |   |  |
| <b>FN1521</b> | AAL93647.1   Dipeptide transport system permease protein dppB      |        |          |          |            |        |          |          |              |        |          |          |                |        |          |          |              |        |          |          |                |        |          |          |                         |     |       |       |    |    |    |   |   |   |   |  |

Show detected proteins only  
 Show all proteins  
 Filter by category:

Proteins found: 1424

Enter (or paste) list of ORFs

Find ORFs

Test Cutoff

q-Value .005

p-Value

Dot Plots

| Signif | Direction | Applies To   |
|--------|-----------|--------------|
| yes    | +         | ratios, bars |
| no     | n/a       | bars         |
| yes    | -         | ratios, bars |
| yes    | +         | p-, q-Values |
| yes    | -         | p-, q-Values |

FnPg vs Fn — █ — FnSg vs Fn  
 FnPgSg vs Fn — █ — FnPgSg vs FnPg  
 FnSg vs FnPg — █ — FnPgSg vs FnSg



Fn Summary Table   FnPg vs Fn   FnSg vs Fn   FnPgSg vs FnPg   FnPgSg vs FnPg   FnSg vs FnPg   FnPgSg vs FnSg   Fn Coverage

| ORF           | FnPg vs Fn    |               |          |          | FnSg vs Fn    |        |          |          | FnPgSg vs FnPg |        |          |          | FnPgSg vs FnPg |        |          |          | FnSg vs FnPg  |        |          |          | FnPgSg vs FnSg |        |          |          | Log <sub>2</sub> Ratios                                                |     |       |       |    |    |    |   |   |   |
|---------------|---------------|---------------|----------|----------|---------------|--------|----------|----------|----------------|--------|----------|----------|----------------|--------|----------|----------|---------------|--------|----------|----------|----------------|--------|----------|----------|------------------------------------------------------------------------|-----|-------|-------|----|----|----|---|---|---|
|               | Ratio         | Sum           | q-Val    | p-Val    | Ratio         | Sum    | q-Val    | p-Val    | Ratio          | Sum    | q-Val    | p-Val    | Ratio          | Sum    | q-Val    | p-Val    | Ratio         | Sum    | q-Val    | p-Val    | Ratio          | Sum    | q-Val    | p-Val    | Ratio                                                                  | Sum | q-Val | p-Val | -6 | -4 | -2 | 0 | 2 | 4 |
| <b>FN1545</b> | 2.272         | 11.903        | 7.697e-2 | 1.614e-1 | 0.334         | 10.149 | 2.383e-2 | 1.242e-1 | -0.225         | 9.202  | 7.222e-2 | 3.895e-1 | -2.497         | 11.678 | 7.813e-2 | 1.507e-1 | -1.939        | 12.421 | 1.475e-1 | 1.832e-1 | -0.558         | 9.924  | 5.84e-3  | 1.832e-2 | AAL93671.1   Ferredoxin like protein                                   |     |       |       |    |    |    |   |   |   |
| <b>FN1546</b> | 1.071         | 20.811        | 7.679e-2 | 1.609e-1 | <b>0.545</b>  | 20.470 | 5.559e-4 | 1.409e-3 | <b>0.606</b>   | 20.143 | 2.58e-4  | 4.147e-4 | -0.465         | 21.417 | 1.501e-1 | 4.019e-1 | -0.526        | 21.541 | 2.201e-1 | 3.6e-1   | 0.061          | 21.076 | 7.716e-2 | 3.617e-1 | AAL93672.1   Protein Translation Elongation Factor G (EF-G)            |     |       |       |    |    |    |   |   |   |
| <b>FN1547</b> | -0.720        | 14.595        | 5.234e-3 | 4.838e-3 | <b>-0.863</b> | 14.636 | 2.552e-5 | 2.31e-5  | <b>-0.316</b>  | 14.795 | 3.208e-5 | 1.915e-5 | 0.404          | 14.279 | 2.769e-2 | 3.382e-2 | -0.143        | 13.916 | 2.21e-1  | 3.623e-1 | <b>0.547</b>   | 14.320 | 3.02e-4  | 3.895e-4 | AAL93673.1   PTS permease for N-acetylglucosamine and glucose          |     |       |       |    |    |    |   |   |   |
| <b>FN1548</b> | <b>-0.490</b> | 10.041        | 8.847e-4 | 3.888e-4 | -0.370        | 10.345 | 7.522e-2 | 4.322e-1 | 0.477          | 10.804 | 3.204e-2 | 1.553e-1 | 0.967          | 10.518 | 3.4e-2   | 4.586e-2 | 0.120         | 9.855  | 3.86e-1  | 8.207e-1 | 0.847          | 10.823 | 2.627e-2 | 1.073e-1 | AAL93674.1   Hypothetical protein                                      |     |       |       |    |    |    |   |   |   |
| <b>FN1549</b> | -0.602        | 19.011        | 6.144e-3 | 6.014e-3 | -0.254        | 19.544 | 4.367e-2 | 2.407e-1 | <b>0.343</b>   | 19.753 | 2.978e-3 | 9.795e-3 | <b>0.945</b>   | 19.354 | 1.889e-3 | 6.427e-4 | 0.348         | 18.942 | 1.557e-1 | 2.042e-1 | 0.597          | 19.887 | 7.166e-3 | 2.351e-2 | AAL93675.1   Stomatin like protein                                     |     |       |       |    |    |    |   |   |   |
| <b>FN1552</b> | -1.922        | 5.922         |          |          | -0.844        | 7.184  |          |          |                |        |          |          |                |        |          |          | 1.078         | 5.262  |          |          |                |        |          |          | AAL93678.1   abortive phage resistance protein                         |     |       |       |    |    |    |   |   |   |
| <b>FN1553</b> | <b>-1.121</b> | 7.900         | 2.257e-3 | 1.526e-3 | -0.142        | 9.062  | 1.157e-1 | 6.955e-1 | -0.038         | 8.779  | 1.476e-1 | 8.762e-1 | 1.083          | 7.862  | 2.959e-2 | 3.729e-2 | 0.978         | 7.942  | 1.243e-1 | 1.279e-1 | 0.105          | 9.025  | 1.563e-1 | 8.012e-1 | AAL93679.1   abortive phage resistance protein                         |     |       |       |    |    |    |   |   |   |
| <b>FN1554</b> | <b>-0.887</b> | 16.740        | 1.18e-3  | 6.182e-4 | <b>-1.338</b> | 16.473 | 1.007e-4 | 1.577e-4 | <b>-0.953</b>  | 16.471 | 3.379e-4 | 5.945e-4 | -0.065         | 15.787 | 2.053e-1 | 6.193e-1 | -0.451        | 15.586 | 8.303e-2 | 5.837e-2 | 0.386          | 15.521 | 2.281e-2 | 9.171e-2 | AAL93680.1   Fusobacterium outer membrane protein family               |     |       |       |    |    |    |   |   |   |
| <b>FN1555</b> | -0.096        | 23.668        | 1.81e-2  | 2.377e-2 | 0.072         | 24.020 | 1.043e-2 | 4.901e-2 | <b>0.494</b>   | 24.054 | 7.898e-6 | 2.287e-6 | <b>0.590</b>   | 24.162 | 3.299e-5 | 1.409e-6 | <b>0.168</b>  | 23.924 | 2.456e-3 | 1.746e-4 | <b>0.422</b>   | 24.514 | 3.167e-5 | 1.753e-5 | AAL93681.1   Protein Translation Elongation Factor Tu                  |     |       |       |    |    |    |   |   |   |
| <b>FN1556</b> | <b>-0.929</b> | 20.112        | 1.178e-3 | 6.165e-4 | <b>-1.342</b> | 19.883 | 4.77e-4  | 1.154e-3 | 0.097          | 20.934 | 2.3e-2   | 1.057e-1 | <b>1.026</b>   | 20.209 | 1.398e-4 | 1.616e-5 | -0.413        | 18.954 | 9.26e-2  | 7.395e-2 | <b>1.439</b>   | 19.980 | 9.46e-5  | 8.076e-5 | AAL93682.1   Protein Translation Elongation Factor G (EF-G)            |     |       |       |    |    |    |   |   |   |
| <b>FN1557</b> | <b>0.863</b>  | <b>13.989</b> | 7.109e-7 | 1.726e-8 | <b>0.505</b>  | 13.816 | 6.96e-5  | 9.795e-5 | <b>2.045</b>   | 14.967 | 9.541e-5 | 1.014e-4 | <b>1.182</b>   | 16.033 | 9.898e-4 | 2.369e-4 | <b>-0.358</b> | 14.678 | 1.171e-3 | 4.066e-5 | <b>1.540</b>   | 15.860 | 1.154e-4 | 1.039e-4 | AAL93683.1   SSU ribosomal protein S7P                                 |     |       |       |    |    |    |   |   |   |
| <b>FN1558</b> |               |               |          |          |               |        |          |          |                |        |          |          | 0.138          | 13.531 |          |          |               |        |          |          |                |        |          |          | AAL93684.1   SSU ribosomal protein S12P                                |     |       |       |    |    |    |   |   |   |
| <b>FN1560</b> | -0.560        | 13.953        | 1.565e-1 | 4.016e-1 | <b>0.726</b>  | 15.424 | 1.205e-5 | 7.989e-6 | <b>-0.656</b>  | 13.653 | 1.924e-4 | 2.739e-4 | -0.096         | 13.297 | 2.736e-1 | 9.028e-1 | 1.286         | 14.864 | 8.326e-2 | 5.871e-2 | <b>-1.383</b>  | 14.767 | 9.93e-6  | 2.895e-6 | AAL93686.1   unknown                                                   |     |       |       |    |    |    |   |   |   |
| <b>FN1562</b> | -1.156        | 6.793         | 8.204e-3 | 8.941e-3 | -0.144        | 7.989  | 2.775e-2 | 1.468e-1 | -1.550         | 6.194  |          |          | -0.395         | 5.243  |          |          | 1.011         | 6.833  | 4.761e-2 | 2.068e-2 | -1.406         | 6.438  |          |          | AAL93688.1   Phospho-2-dehydro-3-deoxyheptonate aldolase               |     |       |       |    |    |    |   |   |   |
| <b>FN1576</b> |               |               |          |          |               |        |          |          |                |        |          |          |                |        |          |          |               |        |          |          |                |        |          |          | AAL93691.1   ATPases and helicase subunits involved in DNA replication |     |       |       |    |    |    |   |   |   |
| <b>FN1577</b> | 0.437         | 15.288        | 1.17e-1  | 2.763e-1 | <b>1.133</b>  | 16.169 | 4.636e-5 | 5.509e-5 | -0.079         | 14.568 | 3.613e-2 | 1.788e-1 | -0.517         | 15.208 | 1.011e-1 | 2.234e-1 | 0.696         | 16.606 | 7.488e-2 | 4.715e-2 | <b>-1.213</b>  | 16.089 | 2.63e-4  | 3.247e-4 | AAL93692.1   Rod shape-determining protein mreB                        |     |       |       |    |    |    |   |   |   |
| <b>FN1579</b> | -0.033        | 12.799        | 2.884e-1 | 9.037e-1 | 0.259         | 13.276 | 1.429e-2 | 7.063e-2 | <b>-0.459</b>  | 12.170 | 4.335e-3 | 1.539e-2 | -0.425         | 12.341 | 1.029e-1 | 2.3e-1   | 0.292         | 13.243 | 1.894e-1 | 2.863e-1 | <b>-0.718</b>  | 12.817 | 1.064e-3 | 2.105e-3 | AAL93694.1   CysteinyI-tRNA synthetase                                 |     |       |       |    |    |    |   |   |   |

Show detected proteins only

Show all proteins

Filter by category:

GO: amino acid transport

Proteins found: 1424

Enter (or paste) list of ORFs

Find ORFs

Test

q-Value

p-Value

Cutoff

.005

Dot Plots

Dot Plots

| Signif | Direction | Applies To   |
|--------|-----------|--------------|
| yes    | +         | ratios, bars |
| no     | n/a       | bars         |
| yes    | -         | ratios, bars |
| yes    | +         | p-, q-Values |
| yes    | -         | p-, q-Values |

FnPg vs Fn

FnPgSg vs FnPg

FnSg vs FnPg

FnSg vs Fn

FnPgSg vs FnSg

Fn Summary Table

FnPg vs Fn

FnSg vs Fn

FnPgSg vs Fn

FnPgSg vs FnPg

FnSg vs FnPg

FnPgSg vs FnSg

Fn Coverage

| ORF           | FnPg vs Fn                                                           |        |          |          | FnSg vs Fn |        |          |          | FnPgSg vs Fn |        |          |          | FnPgSg vs FnPg |        |          |          | FnSg vs FnPg |        |          |          | FnPgSg vs FnSg |        |          |          | Log <sub>2</sub> Ratios |     |       |       |    |    |    |   |   |   |   |  |
|---------------|----------------------------------------------------------------------|--------|----------|----------|------------|--------|----------|----------|--------------|--------|----------|----------|----------------|--------|----------|----------|--------------|--------|----------|----------|----------------|--------|----------|----------|-------------------------|-----|-------|-------|----|----|----|---|---|---|---|--|
|               | Ratio                                                                | Sum    | q-Val    | p-Val    | Ratio      | Sum    | q-Val    | p-Val    | Ratio        | Sum    | q-Val    | p-Val    | Ratio          | Sum    | q-Val    | p-Val    | Ratio        | Sum    | q-Val    | p-Val    | Ratio          | Sum    | q-Val    | p-Val    | Ratio                   | Sum | q-Val | p-Val | -6 | -4 | -2 | 0 | 2 | 4 | 6 |  |
| <b>FN1580</b> |                                                                      |        |          |          | -1.373     | 4.543  |          |          |              |        |          |          |                |        |          |          |              |        |          |          |                |        |          |          |                         |     |       |       |    |    |    |   |   |   |   |  |
|               | AAL933695.1   2-C-methyl-D-erythritol 4-phosphate cytidyltransferase |        |          |          |            |        |          |          |              |        |          |          |                |        |          |          |              |        |          |          |                |        |          |          |                         |     |       |       |    |    |    |   |   |   |   |  |
| <b>FN1581</b> | -0.576                                                               | 10.825 | 1.57e-2  | 1.97e-2  | 0.409      | 11.994 | 2.001e-2 | 1.025e-1 | -0.610       | 10.586 | 4.59e-3  | 1.647e-2 | -0.035         | 10.214 | 2.59e-1  | 8.38e-1  | 0.985        | 11.419 | 3.48e-2  | 1.189e-2 | -1.020         | 11.384 | 5.226e-3 | 1.589e-2 |                         |     |       |       |    |    |    |   |   |   |   |  |
|               | AAL933696.1   DNA mismatch repair protein mutS                       |        |          |          |            |        |          |          |              |        |          |          |                |        |          |          |              |        |          |          |                |        |          |          |                         |     |       |       |    |    |    |   |   |   |   |  |
| <b>FN1582</b> | 0.608                                                                | 8.310  |          |          | 0.568      | 8.455  |          |          |              |        |          |          |                |        |          |          | -0.040       | 9.063  |          |          |                |        |          |          |                         |     |       |       |    |    |    |   |   |   |   |  |
|               | AAL933697.1   Hypothetical protein                                   |        |          |          |            |        |          |          |              |        |          |          |                |        |          |          |              |        |          |          |                |        |          |          |                         |     |       |       |    |    |    |   |   |   |   |  |
| <b>FN1586</b> |                                                                      |        |          |          |            |        |          |          |              |        |          |          |                |        |          |          | -0.890       | 7.635  |          |          |                |        |          |          |                         |     |       |       |    |    |    |   |   |   |   |  |
|               | AAL933701.1   O-succinylbenzoate-CoA synthase                        |        |          |          |            |        |          |          |              |        |          |          |                |        |          |          |              |        |          |          |                |        |          |          |                         |     |       |       |    |    |    |   |   |   |   |  |
| <b>FN1589</b> | -1.771                                                               | 9.665  | 2.161e-3 | 1.443e-3 | -0.798     | 10.823 | 3.784e-3 | 1.506e-2 | -1.276       | 9.956  | 2.001e-3 | 6.064e-3 | 0.495          | 8.389  | 1.205e-1 | 2.925e-1 | 0.973        | 9.052  | 8.254e-2 | 5.765e-2 | -0.478         | 9.546  | 2.575e-2 | 1.687e-3 |                         |     |       |       |    |    |    |   |   |   |   |  |
|               | AAL933704.1   LexA repressor                                         |        |          |          |            |        |          |          |              |        |          |          |                |        |          |          |              |        |          |          |                |        |          |          |                         |     |       |       |    |    |    |   |   |   |   |  |
| <b>FN1590</b> |                                                                      |        |          |          |            |        |          |          |              |        |          |          |                |        |          |          | -0.431       | 4.397  |          |          |                |        |          |          |                         |     |       |       |    |    |    |   |   |   |   |  |
|               | AAL933705.1   Hypothetical lipoprotein                               |        |          |          |            |        |          |          |              |        |          |          |                |        |          |          |              |        |          |          |                |        |          |          |                         |     |       |       |    |    |    |   |   |   |   |  |
| <b>FN1591</b> | -0.869                                                               | 15.690 | 1.049e-3 | 5.071e-4 | -0.828     | 15.915 | 1.573e-3 | 5.135e-3 | -0.438       | 15.917 | 1.34e-4  | 1.648e-4 | 0.431          | 15.252 | 1.435e-2 | 1.313e-2 | 0.041        | 15.046 | 3.943e-1 | 8.498e-1 | 0.390          | 15.478 | 1.912e-2 | 7.478e-2 |                         |     |       |       |    |    |    |   |   |   |   |  |
|               | AAL933706.1   RNFB-related protein                                   |        |          |          |            |        |          |          |              |        |          |          |                |        |          |          |              |        |          |          |                |        |          |          |                         |     |       |       |    |    |    |   |   |   |   |  |
| <b>FN1592</b> |                                                                      |        |          |          |            |        |          |          |              |        |          |          | 0.344          | 7.745  |          |          | -1.208       | 6.378  |          |          | 1.552          | 6.722  |          |          |                         |     |       |       |    |    |    |   |   |   |   |  |
|               | AAL933707.1   Na(+)-translocating NADH-quinone reductase subunit D   |        |          |          |            |        |          |          |              |        |          |          |                |        |          |          |              |        |          |          |                |        |          |          |                         |     |       |       |    |    |    |   |   |   |   |  |
| <b>FN1594</b> | -0.519                                                               | 11.095 | 2.673e-2 | 3.9e-2   | -0.772     | 11.027 | 3.114e-4 | 6.754e-4 | 0.815        | 12.225 | 3.051e-5 | 1.748e-5 | 1.334          | 11.910 | 2.603e-3 | 9.967e-4 | -0.252       | 10.508 | 2.101e-1 | 3.36e-1  | 1.586          | 11.842 | 4.133e-5 | 2.661e-5 |                         |     |       |       |    |    |    |   |   |   |   |  |
|               | AAL933709.1   Nitrogen fixation protein RNFG                         |        |          |          |            |        |          |          |              |        |          |          |                |        |          |          |              |        |          |          |                |        |          |          |                         |     |       |       |    |    |    |   |   |   |   |  |
| <b>FN1595</b> | 0.081                                                                | 14.238 | 2.867e-1 | 8.961e-1 | -0.390     | 13.951 | 3.337e-3 | 1.283e-2 | 0.443        | 14.395 | 9.011e-4 | 2.09e-3  | 0.361          | 14.681 | 1.798e-1 | 5.125e-1 | -0.471       | 14.033 | 2.854e-1 | 5.215e-1 | 0.832          | 14.394 | 1.055e-4 | 9.263e-5 |                         |     |       |       |    |    |    |   |   |   |   |  |
|               | AAL933710.1   Na(+)-translocating NADH-quinone reductase subunit B   |        |          |          |            |        |          |          |              |        |          |          |                |        |          |          |              |        |          |          |                |        |          |          |                         |     |       |       |    |    |    |   |   |   |   |  |
| <b>FN1596</b> | -0.888                                                               | 19.764 | 2.767e-2 | 4.074e-2 | -1.721     | 19.116 | 5.396e-5 | 6.761e-5 | -0.538       | 19.910 | 1.288e-3 | 3.388e-3 | 0.350          | 19.226 | 1.36e-1  | 3.515e-1 | -0.833       | 18.228 | 1.435e-1 | 1.721e-1 | 1.183          | 18.578 | 2.504e-4 | 3.016e-4 |                         |     |       |       |    |    |    |   |   |   |   |  |
|               | AAL933711.1   Nitrogen fixation iron-sulphur protein RNFC            |        |          |          |            |        |          |          |              |        |          |          |                |        |          |          |              |        |          |          |                |        |          |          |                         |     |       |       |    |    |    |   |   |   |   |  |
| <b>FN1597</b> | 0.789                                                                | 8.764  |          |          |            |        |          |          | -1.886       | 5.886  |          |          | -2.674         | 6.878  |          |          |              |        |          |          |                |        |          |          |                         |     |       |       |    |    |    |   |   |   |   |  |
|               | AAL933712.1   Peptidyl-tRNA hydrolase                                |        |          |          |            |        |          |          |              |        |          |          |                |        |          |          |              |        |          |          |                |        |          |          |                         |     |       |       |    |    |    |   |   |   |   |  |
| <b>FN1600</b> | 0.594                                                                | 6.325  |          |          | -0.202     | 5.714  |          |          |              |        |          |          |                |        |          |          | -0.796       | 6.307  |          |          |                |        |          |          |                         |     |       |       |    |    |    |   |   |   |   |  |
|               | AAL933715.1   tRNA pseudouridine synthase A                          |        |          |          |            |        |          |          |              |        |          |          |                |        |          |          |              |        |          |          |                |        |          |          |                         |     |       |       |    |    |    |   |   |   |   |  |
| <b>FN1601</b> |                                                                      |        |          |          | 0.726      | 5.694  |          |          |              |        |          |          |                |        |          |          |              |        |          |          |                |        |          |          |                         |     |       |       |    |    |    |   |   |   |   |  |
|               | AAL933716.1   Hypothetical cytosolic protein                         |        |          |          |            |        |          |          |              |        |          |          |                |        |          |          |              |        |          |          |                |        |          |          |                         |     |       |       |    |    |    |   |   |   |   |  |
| <b>FN1602</b> |                                                                      |        |          |          |            |        |          |          |              |        |          |          |                |        |          |          |              |        |          |          |                |        |          |          |                         |     |       |       |    |    |    |   |   |   |   |  |
|               | AAL933717.1   Hypothetical cytosolic protein                         |        |          |          |            |        |          |          |              |        |          |          |                |        |          |          |              |        |          |          |                |        |          |          |                         |     |       |       |    |    |    |   |   |   |   |  |
| <b>FN1603</b> | -2.122                                                               | 7.031  |          |          | -2.466     | 6.871  | 4.153e-4 | 9.665e-4 | -1.777       | 7.171  | 2.058e-4 | 3.034e-4 | 0.345          | 5.253  |          |          | -0.344       | 4.749  |          |          | 0.688          | 5.094  | 4.226e-2 | 1.843e-1 |                         |     |       |       |    |    |    |   |   |   |   |  |
|               | AAL933718.1   2',3'-cyclic nucleotide 3'-phosphodiesterase           |        |          |          |            |        |          |          |              |        |          |          |                |        |          |          |              |        |          |          |                |        |          |          |                         |     |       |       |    |    |    |   |   |   |   |  |
| <b>FN1605</b> | -0.300                                                               | 16.736 | 7.979e-2 | 1.693e-1 | -0.305     | 16.915 | 9.648e-4 | 2.853e-3 | -0.533       | 16.299 | 3.651e-4 | 6.636e-4 | -0.233         | 16.203 | 1.305e-1 | 3.296e-1 | -0.006       | 16.615 | 4.282e-1 | 9.776e-1 | -0.227         | 16.382 | 1.356e-5 | 4.77e-6  |                         |     |       |       |    |    |    |   |   |   |   |  |
|               | AAL933720.1   Adenylosuccinate synthetase                            |        |          |          |            |        |          |          |              |        |          |          |                |        |          |          |              |        |          |          |                |        |          |          |                         |     |       |       |    |    |    |   |   |   |   |  |

Show detected proteins only

Show all proteins

Filter by category:

GO: amino acid transport

Proteins found: 1424

Enter (or paste) list of ORFs

Find ORFs

Test

q-Value

p-Value

Cutoff

.005

Dot Plots

Dot Plots

| Signif | Direction | Applies To   |
|--------|-----------|--------------|
| yes    | +         | ratios, bars |
| no     | n/a       | bars         |
| yes    | -         | ratios, bars |
| yes    | +         | p-, q-Values |
| yes    | -         | p-, q-Values |

FnPg vs Fn

FnPgSg vs Fn

FnSg vs FnPg

FnPgSg vs FnSg

FnSg vs Fn

FnPgSg vs FnPg



Fn Summary Table    FnPg vs Fn    FnSg vs Fn    FnPgSg vs FnPg    FnPgSg vs FnPg    FnSg vs FnPg    FnPgSg vs FnSg    Fn Coverage

| ORF           | FnPg vs Fn                                                |        |          |          | FnSg vs Fn |        |          |          | FnPgSg vs FnPg |        |          |          | FnPgSg vs FnPg |        |          |          | FnSg vs FnPg |        |          |          | FnPgSg vs FnSg |        |          |          | Log <sub>2</sub> Ratios |     |       |       |    |    |    |   |   |   |   |  |  |  |  |  |  |  |  |  |
|---------------|-----------------------------------------------------------|--------|----------|----------|------------|--------|----------|----------|----------------|--------|----------|----------|----------------|--------|----------|----------|--------------|--------|----------|----------|----------------|--------|----------|----------|-------------------------|-----|-------|-------|----|----|----|---|---|---|---|--|--|--|--|--|--|--|--|--|
|               | Ratio                                                     | Sum    | q-Val    | p-Val    | Ratio      | Sum    | q-Val    | p-Val    | Ratio          | Sum    | q-Val    | p-Val    | Ratio          | Sum    | q-Val    | p-Val    | Ratio        | Sum    | q-Val    | p-Val    | Ratio          | Sum    | q-Val    | p-Val    | Ratio                   | Sum | q-Val | p-Val | -6 | -4 | -2 | 0 | 2 | 4 | 6 |  |  |  |  |  |  |  |  |  |
| <b>FN1606</b> | -1.640                                                    | 10.113 | 4.178e-4 | 1.15e-4  | -0.891     | 11.047 | 8.397e-5 | 1.259e-4 | -1.934         | 9.616  | 5.688e-6 | 1.373e-6 | -0.294         | 8.179  | 1.352e-1 | 3.481e-1 | 0.749        | 9.406  | 4.704e-2 | 2.022e-2 | -1.043         | 9.113  | 2.985e-4 | 3.836e-4 |                         |     |       |       |    |    |    |   |   |   |   |  |  |  |  |  |  |  |  |  |
|               | AAL93721.1   3-deoxy-D-manno-octulosonic-acid transferase |        |          |          |            |        |          |          |                |        |          |          |                |        |          |          |              |        |          |          |                |        |          |          |                         |     |       |       |    |    |    |   |   |   |   |  |  |  |  |  |  |  |  |  |
| <b>FN1607</b> | -0.404                                                    | 8.668  | 4.08e-2  | 6.775e-2 | -0.342     | 8.914  | 5.076e-2 | 2.837e-1 | -1.077         | 7.792  |          |          | -0.673         | 7.592  |          |          | 0.062        | 8.510  | 3.944e-1 | 8.503e-1 | -0.734         | 7.838  |          |          |                         |     |       |       |    |    |    |   |   |   |   |  |  |  |  |  |  |  |  |  |
|               | AAL93722.1   Cytidylate kinase                            |        |          |          |            |        |          |          |                |        |          |          |                |        |          |          |              |        |          |          |                |        |          |          |                         |     |       |       |    |    |    |   |   |   |   |  |  |  |  |  |  |  |  |  |
| <b>FN1608</b> |                                                           |        |          |          |            |        |          |          |                |        |          |          |                |        |          |          | 0.087        | 6.271  |          |          |                |        |          |          |                         |     |       |       |    |    |    |   |   |   |   |  |  |  |  |  |  |  |  |  |
|               | AAL93723.1   Ribosomal protein L11 methyltransferase      |        |          |          |            |        |          |          |                |        |          |          |                |        |          |          |              |        |          |          |                |        |          |          |                         |     |       |       |    |    |    |   |   |   |   |  |  |  |  |  |  |  |  |  |
| <b>FN1609</b> | -2.360                                                    | 9.530  |          |          | -3.883     | 8.192  | 1.548e-4 | 2.81e-4  | -3.843         | 7.843  |          |          | -1.483         | 5.687  |          |          | -1.523       | 5.832  |          |          | 0.040          | 4.349  |          |          |                         |     |       |       |    |    |    |   |   |   |   |  |  |  |  |  |  |  |  |  |
|               | AAL93724.1   Hypothetical protein                         |        |          |          |            |        |          |          |                |        |          |          |                |        |          |          |              |        |          |          |                |        |          |          |                         |     |       |       |    |    |    |   |   |   |   |  |  |  |  |  |  |  |  |  |
| <b>FN1610</b> | 0.674                                                     | 9.850  | 5.91e-4  | 1.98e-4  | 0.512      | 9.873  | 4.198e-4 | 9.797e-4 | -0.837         | 8.135  | 3.9e-4   | 7.255e-4 | -1.511         | 9.013  | 3.332e-5 | 1.433e-6 | -0.161       | 10.547 | 3.236e-2 | 1.041e-2 | -1.349         | 9.036  | 1.228e-5 | 4.038e-6 |                         |     |       |       |    |    |    |   |   |   |   |  |  |  |  |  |  |  |  |  |
|               | AAL93725.1   33 kDa chaperonin                            |        |          |          |            |        |          |          |                |        |          |          |                |        |          |          |              |        |          |          |                |        |          |          |                         |     |       |       |    |    |    |   |   |   |   |  |  |  |  |  |  |  |  |  |
| <b>FN1611</b> |                                                           |        |          |          |            |        |          |          |                |        |          |          |                |        |          |          |              |        |          |          |                |        |          |          |                         |     |       |       |    |    |    |   |   |   |   |  |  |  |  |  |  |  |  |  |
|               | AAL93726.1   Competence protein                           |        |          |          |            |        |          |          |                |        |          |          |                |        |          |          |              |        |          |          |                |        |          |          |                         |     |       |       |    |    |    |   |   |   |   |  |  |  |  |  |  |  |  |  |
| <b>FN1613</b> | -0.193                                                    | 8.730  | 2.094e-1 | 2.87e-2  | -0.305     | 8.802  | 5.135e-2 | 2.873e-1 | -0.131         | 8.589  | 3.769e-2 | 1.877e-1 | 0.062          | 8.599  | 1.88e-1  | 5.455e-1 | -0.112       | 8.610  | 3.461e-1 | 6.909e-1 | 0.174          | 8.672  | 1.115e-1 | 5.429e-1 |                         |     |       |       |    |    |    |   |   |   |   |  |  |  |  |  |  |  |  |  |
|               | AAL93728.1   Hypothetical protein                         |        |          |          |            |        |          |          |                |        |          |          |                |        |          |          |              |        |          |          |                |        |          |          |                         |     |       |       |    |    |    |   |   |   |   |  |  |  |  |  |  |  |  |  |
| <b>FN1614</b> | -0.398                                                    | 10.108 | 6.677e-2 | 1.343e-1 | -1.318     | 9.373  | 3.635e-3 | 1.431e-2 | -0.923         | 9.380  | 6.385e-3 | 2.443e-2 | -0.524         | 9.186  | 2.064e-2 | 2.22e-2  | -0.920       | 8.975  | 2.841e-2 | 8.311e-3 | 0.395          | 8.451  | 5.26e-3  | 1.603e-2 |                         |     |       |       |    |    |    |   |   |   |   |  |  |  |  |  |  |  |  |  |
|               | AAL93729.1   MG(2+) chelatase family protein              |        |          |          |            |        |          |          |                |        |          |          |                |        |          |          |              |        |          |          |                |        |          |          |                         |     |       |       |    |    |    |   |   |   |   |  |  |  |  |  |  |  |  |  |
| <b>FN1616</b> | -0.145                                                    | 8.145  |          |          | -0.652     | 7.822  |          |          | 1.703          | 9.788  | 1.199e-2 | 5.059e-2 | 1.848          | 9.848  |          |          | -0.507       | 7.677  |          |          | 2.355          | 9.525  |          |          |                         |     |       |       |    |    |    |   |   |   |   |  |  |  |  |  |  |  |  |  |
|               | AAL93731.1   N utilization substance protein B            |        |          |          |            |        |          |          |                |        |          |          |                |        |          |          |              |        |          |          |                |        |          |          |                         |     |       |       |    |    |    |   |   |   |   |  |  |  |  |  |  |  |  |  |
| <b>FN1618</b> | 0.013                                                     | 10.298 | 3.024e-1 | 9.667e-1 | 0.513      | 10.982 | 2.119e-3 | 7.304e-3 | 0.513          | 10.595 | 1.399e-3 | 3.82e-3  | 0.500          | 10.812 | 6.944e-2 | 1.277e-1 | 0.500        | 10.996 | 1.242e-1 | 1.277e-1 | 0.001          | 11.496 | 1.87e-1  | 9.948e-1 |                         |     |       |       |    |    |    |   |   |   |   |  |  |  |  |  |  |  |  |  |
|               | AAL93733.1   Hypothetical protein                         |        |          |          |            |        |          |          |                |        |          |          |                |        |          |          |              |        |          |          |                |        |          |          |                         |     |       |       |    |    |    |   |   |   |   |  |  |  |  |  |  |  |  |  |
| <b>FN1619</b> | 1.079                                                     | 14.402 | 5.791e-3 | 5.542e-3 | 1.088      | 14.596 | 8.853e-3 | 4.044e-2 | 1.804          | 14.923 | 1.135e-3 | 2.836e-3 | 0.725          | 16.205 | 1.195e-2 | 8.997e-3 | 0.010        | 15.674 | 4.265e-1 | 9.71e-1  | 0.716          | 16.400 | 6.592e-3 | 2.122e-2 |                         |     |       |       |    |    |    |   |   |   |   |  |  |  |  |  |  |  |  |  |
|               | AAL93734.1   Hypothetical cytosolic protein               |        |          |          |            |        |          |          |                |        |          |          |                |        |          |          |              |        |          |          |                |        |          |          |                         |     |       |       |    |    |    |   |   |   |   |  |  |  |  |  |  |  |  |  |
| <b>FN1620</b> | -0.686                                                    | 18.440 | 3.672e-2 | 5.888e-2 | -1.141     | 18.170 | 5.5e-5   | 6.944e-5 | -0.186         | 18.736 | 7.55e-3  | 2.966e-2 | 0.500          | 18.254 | 7.539e-2 | 1.433e-1 | -0.455       | 17.483 | 1.904e-1 | 2.889e-1 | 0.955          | 17.983 | 4.72e-5  | 3.227e-5 |                         |     |       |       |    |    |    |   |   |   |   |  |  |  |  |  |  |  |  |  |
|               | AAL93735.1   SSU ribosomal protein S2P                    |        |          |          |            |        |          |          |                |        |          |          |                |        |          |          |              |        |          |          |                |        |          |          |                         |     |       |       |    |    |    |   |   |   |   |  |  |  |  |  |  |  |  |  |
| <b>FN1621</b> | -0.815                                                    | 20.738 | 1.155e-2 | 1.346e-2 | -1.772     | 19.966 | 2.151e-6 | 5.041e-7 | -0.264         | 21.085 | 1.658e-2 | 7.3e-2   | 0.551          | 20.474 | 3.868e-2 | 5.494e-2 | -0.957       | 19.151 | 7.665e-2 | 4.943e-2 | 1.508          | 19.702 | 1.141e-3 | 2.309e-3 |                         |     |       |       |    |    |    |   |   |   |   |  |  |  |  |  |  |  |  |  |
|               | AAL93736.1   Protein Translation Elongation Factor Ts     |        |          |          |            |        |          |          |                |        |          |          |                |        |          |          |              |        |          |          |                |        |          |          |                         |     |       |       |    |    |    |   |   |   |   |  |  |  |  |  |  |  |  |  |
| <b>FN1622</b> | -1.405                                                    | 14.538 | 1.889e-3 | 1.184e-3 | -1.300     | 14.828 | 2.136e-3 | 7.376e-3 | -0.173         | 15.566 | 1.593e-2 | 6.974e-2 | 1.232          | 14.365 | 1.129e-3 | 2.962e-4 | 0.105        | 13.423 | 3.79e-1  | 7.969e-1 | 1.127          | 14.655 | 3.045e-3 | 7.82e-3  |                         |     |       |       |    |    |    |   |   |   |   |  |  |  |  |  |  |  |  |  |
|               | AAL93737.1   Uridylate kinase                             |        |          |          |            |        |          |          |                |        |          |          |                |        |          |          |              |        |          |          |                |        |          |          |                         |     |       |       |    |    |    |   |   |   |   |  |  |  |  |  |  |  |  |  |
| <b>FN1623</b> | -1.639                                                    | 12.064 | 1.382e-3 | 7.695e-4 | -2.822     | 11.066 | 3.864e-4 | 8.838e-4 | -0.657         | 12.842 | 3.933e-3 | 1.364e-2 | 0.982          | 11.407 | 3.319e-3 | 1.433e-3 | -1.182       | 9.427  | 2.799e-2 | 8.104e-3 | 2.164          | 10.409 | 3.734e-6 | 6.834e-7 |                         |     |       |       |    |    |    |   |   |   |   |  |  |  |  |  |  |  |  |  |
|               | AAL93738.1   Ribosome Recycling Factor (RRF)              |        |          |          |            |        |          |          |                |        |          |          |                |        |          |          |              |        |          |          |                |        |          |          |                         |     |       |       |    |    |    |   |   |   |   |  |  |  |  |  |  |  |  |  |
| <b>FN1624</b> | -2.007                                                    | 10.926 |          |          | -2.311     | 10.807 |          |          | -0.341         | 12.388 | 6.462e-4 | 1.384e-3 | 1.666          | 10.584 |          |          | -0.304       | 8.800  |          |          | 1.969          | 10.465 |          |          |                         |     |       |       |    |    |    |   |   |   |   |  |  |  |  |  |  |  |  |  |
|               | AAL93739.1   Protein translocase subunit secY             |        |          |          |            |        |          |          |                |        |          |          |                |        |          |          |              |        |          |          |                |        |          |          |                         |     |       |       |    |    |    |   |   |   |   |  |  |  |  |  |  |  |  |  |
| <b>FN1625</b> | -1.012                                                    | 13.664 | 1.985e-2 | 2.686e-2 | -1.252     | 13.608 | 3.134e-5 | 3.048e-5 | -0.387         | 14.085 | 1.329e-3 | 3.546e-3 | 0.625          | 13.277 | 6.993e-2 | 1.29e-1  | -0.240       | 12.596 | 3.144e-1 | 5.987e-1 | 0.865          | 13.221 | 6.324e-5 | 4.749e-5 |                         |     |       |       |    |    |    |   |   |   |   |  |  |  |  |  |  |  |  |  |
|               | AAL93740.1   LSU ribosomal protein L15P                   |        |          |          |            |        |          |          |                |        |          |          |                |        |          |          |              |        |          |          |                |        |          |          |                         |     |       |       |    |    |    |   |   |   |   |  |  |  |  |  |  |  |  |  |

Show detected proteins only  
 Show all proteins  
 Filter by category:

Proteins found: 1424

Test      Cutoff

| Signif | Direction | Applies To   |
|--------|-----------|--------------|
| yes    | +         | ratios, bars |
| no     | n/a       | bars         |
| yes    | -         | ratios, bars |
| yes    | +         | p-, q-Values |
| yes    | -         | p-, q-Values |

FnPg vs Fn — █ — FnSg vs Fn

FnPgSg vs FnPg — █ — FnPgSg vs FnPg

FnSg vs FnPg — █ — FnPgSg vs FnSg

Fn Summary Table

FnPg vs Fn

FnSg vs Fn

FnPgSg vs Fn

FnPgSg vs FnPg

FnSg vs FnPg

FnPgSg vs FnSg

Fn Coverage

| ORF                                                     | FnPg vs Fn |        |          |          | FnSg vs Fn |        |          |          | FnPgSg vs Fn |        |          |          | FnPgSg vs FnPg |        |          |          | FnSg vs FnPg |        |          |          | FnPgSg vs FnSg |        |          |           | Log <sub>2</sub> Ratios |     |       |       |    |    |    |   |   |   |   |  |
|---------------------------------------------------------|------------|--------|----------|----------|------------|--------|----------|----------|--------------|--------|----------|----------|----------------|--------|----------|----------|--------------|--------|----------|----------|----------------|--------|----------|-----------|-------------------------|-----|-------|-------|----|----|----|---|---|---|---|--|
|                                                         | Ratio      | Sum    | q-Val    | p-Val    | Ratio      | Sum    | q-Val    | p-Val    | Ratio        | Sum    | q-Val    | p-Val    | Ratio          | Sum    | q-Val    | p-Val    | Ratio        | Sum    | q-Val    | p-Val    | Ratio          | Sum    | q-Val    | p-Val     | Ratio                   | Sum | q-Val | p-Val | -6 | -4 | -2 | 0 | 2 | 4 | 6 |  |
| <b>FN1626</b><br>AAL93741.1  LSU ribosomal protein L30P | -3.376     | 9.716  |          |          | -4.316     | 8.960  |          |          | -0.900       | 11.987 | 7.562e-5 | 7.244e-5 | 2.475          | 8.815  |          |          | -0.940       | 5.584  |          |          | 3.416          | 8.060  |          |           |                         |     |       |       |    |    |    |   |   |   |   |  |
| <b>FN1627</b><br>AAL93742.1  SSU ribosomal protein S5P  | -0.912     | 16.987 | 2.226e-4 | 4.499e-5 | -1.029     | 17.054 | 6.439e-6 | 2.95e-6  | 0.508        | 18.203 | 1.979e-2 | 8.923e-2 | 1.420          | 17.495 | 1.469e-2 | 1.365e-2 | -0.117       | 16.142 | 1.286e-1 | 1.369e-1 | 1.537          | 17.562 | 4.071e-3 | 1.141e-2  |                         |     |       |       |    |    |    |   |   |   |   |  |
| <b>FN1628</b><br>AAL93743.1  LSU ribosomal protein L18P | 0.419      | 15.521 |          |          | -3.678     | 11.608 |          |          | 0.274        | 15.172 | 3.376e-2 | 1.653e-1 | -0.145         | 15.795 |          |          | -4.097       | 12.028 |          |          | 3.952          | 11.883 |          |           |                         |     |       |       |    |    |    |   |   |   |   |  |
| <b>FN1629</b><br>AAL93744.1  LSU ribosomal protein L6P  | -0.876     | 17.655 | 3.913e-2 | 6.405e-2 | -1.720     | 16.996 | 1.419e-6 | 2.647e-7 | -1.235       | 17.092 | 1.41e-5  | 5.192e-6 | -0.359         | 16.420 | 1.793e-1 | 5.103e-1 | -0.844       | 16.119 | 1.659e-1 | 2.283e-1 | 0.485          | 15.761 | 4.258e-3 | 1.213e-2  |                         |     |       |       |    |    |    |   |   |   |   |  |
| <b>FN1630</b><br>AAL93745.1  SSU ribosomal protein S8P  | -0.713     | 13.210 | 1.009e-3 | 4.763e-4 | -0.930     | 13.178 | 2.757e-5 | 2.558e-5 | 0.382        | 14.101 | 6.248e-2 | 3.316e-1 | 1.095          | 13.592 | 4.901e-2 | 7.716e-2 | -0.217       | 12.465 | 6.395e-2 | 3.507e-2 | 1.312          | 13.560 | 1.543e-2 | 5.831e-2  |                         |     |       |       |    |    |    |   |   |   |   |  |
| <b>FN1631</b><br>AAL93746.1  SSU ribosomal protein S14P | -1.281     | 5.924  |          |          | -1.730     | 5.660  |          |          | 1.383        | 8.384  |          |          | 2.663          | 7.307  |          |          | -0.449       | 4.379  |          |          | 3.112          | 7.043  |          |           |                         |     |       |       |    |    |    |   |   |   |   |  |
| <b>FN1632</b><br>AAL93747.1  LSU ribosomal protein L5P  | -1.015     | 16.452 | 7.678e-4 | 3.029e-4 | -0.907     | 16.744 | 6.301e-5 | 8.445e-5 | -0.245       | 17.018 | 1.921e-3 | 5.772e-3 | 0.770          | 16.207 | 3.245e-4 | 4.639e-5 | 0.107        | 15.729 | 2.263e-2 | 3.754e-1 | 0.663          | 16.499 | 9.545e-4 | 1.822e-3  |                         |     |       |       |    |    |    |   |   |   |   |  |
| <b>FN1634</b><br>AAL93749.1  LSU ribosomal protein L24P | 0.794      | 11.224 |          |          | -1.227     | 9.388  |          |          | 0.349        | 10.575 | 2.107e-2 | 9.573e-2 | -0.445         | 11.573 |          |          | -2.020       | 10.182 |          |          | 1.575          | 9.737  |          |           |                         |     |       |       |    |    |    |   |   |   |   |  |
| <b>FN1635</b><br>AAL93750.1  LSU ribosomal protein L14P | -1.370     | 9.635  | 6.473e-5 | 7.232e-6 | -2.045     | 9.144  | 5.747e-6 | 2.393e-6 | 0.958        | 11.759 | 4.306e-3 | 1.526e-2 | 2.328          | 10.593 | 6.093e-3 | 3.372e-3 | -0.675       | 7.774  | 3.498e-2 | 1.201e-2 | 3.003          | 10.102 | 1.381e-3 | 2.914e-3  |                         |     |       |       |    |    |    |   |   |   |   |  |
| <b>FN1636</b><br>AAL93751.1  SSU ribosomal protein S17P | -1.670     | 10.912 | 5.613e-3 | 5.312e-3 | -0.115     | 12.651 | 8.779e-2 | 5.114e-1 | -1.114       | 11.264 | 2.879e-3 | 9.391e-3 | 0.556          | 9.799  | 1.266e-1 | 3.146e-1 | 1.554        | 10.981 | 3.977e-2 | 1.49e-2  | -0.998         | 11.537 | 5.464e-4 | 8.462e-4  |                         |     |       |       |    |    |    |   |   |   |   |  |
| <b>FN1637</b><br>AAL93752.1  LSU ribosomal protein L29P |            |        |          |          |            |        |          |          | -0.289       | 10.697 | 1.072e-1 | 6.077e-1 |                |        |          |          |              |        |          |          |                |        |          |           |                         |     |       |       |    |    |    |   |   |   |   |  |
| <b>FN1638</b><br>AAL93753.1  LSU ribosomal protein L16P | -2.223     | 14.563 | 2.355e-4 | 4.924e-5 | -3.449     | 13.521 | 2.494e-5 | 2.24e-5  | -0.088       | 16.494 | 2.375e-2 | 1.096e-1 | 2.135          | 14.475 | 1.758e-3 | 5.738e-4 | -1.226       | 11.299 | 9.84e-2  | 8.267e-2 | 3.360          | 13.433 | 1.988e-8 | 3.763e-10 |                         |     |       |       |    |    |    |   |   |   |   |  |
| <b>FN1639</b><br>AAL93754.1  SSU ribosomal protein S3P  | -0.602     | 19.260 | 3.975e-2 | 6.54e-2  | -1.073     | 18.973 | 3.058e-6 | 9.209e-7 | 0.286        | 19.945 | 1.71e-2  | 7.562e-2 | 0.889          | 19.546 | 1.293e-2 | 1.113e-2 | -0.471       | 18.371 | 1.656e-1 | 2.276e-1 | 1.360          | 19.260 | 1.117e-3 | 2.248e-3  |                         |     |       |       |    |    |    |   |   |   |   |  |
| <b>FN1640</b><br>AAL93755.1  LSU ribosomal protein L22P | -0.669     | 13.873 | 4.407e-2 | 7.534e-2 | -2.077     | 12.650 | 1.394e-6 | 2.562e-7 | 1.630        | 15.969 | 1.477e-3 | 4.125e-3 | 2.300          | 15.503 | 1.902e-3 | 6.501e-4 | -1.408       | 11.980 | 8.823e-2 | 6.657e-2 | 3.707          | 14.280 | 8.917e-4 | 1.669e-3  |                         |     |       |       |    |    |    |   |   |   |   |  |
| <b>FN1641</b><br>AAL93756.1  SSU ribosomal protein S19P | -0.944     | 14.982 | 3.583e-2 | 5.703e-2 | -3.818     | 12.292 | 1.272e-4 | 2.145e-4 | -0.028       | 15.694 | 1.364e-1 | 7.991e-1 | 0.916          | 14.954 | 4.351e-2 | 6.477e-2 | -2.874       | 11.348 | 9.194e-2 | 7.279e-2 | 3.790          | 12.264 | 8.772e-5 | 7.307e-5  |                         |     |       |       |    |    |    |   |   |   |   |  |
| <b>FN1642</b><br>AAL93757.1  LSU ribosomal protein L2P  | -1.187     | 17.039 | 2.304e-2 | 3.236e-2 | -1.562     | 16.848 | 1.176e-5 | 7.651e-6 | -1.107       | 16.915 | 2.324e-4 | 3.626e-4 | 0.080          | 15.932 | 2.689e-1 | 8.816e-1 | -0.375       | 15.662 | 3.009e-1 | 5.621e-1 | 0.455          | 15.741 | 5.236e-3 | 1.593e-2  |                         |     |       |       |    |    |    |   |   |   |   |  |
| <b>FN1643</b><br>AAL93758.1  LSU ribosomal protein L23P | 0.230      | 13.378 | 2.394e-1 | 7.017e-1 | -1.515     | 11.817 | 4.153e-5 | 4.649e-5 | -0.010       | 12.933 | 1.377e-1 | 8.084e-1 | -0.241         | 13.367 | 2.237e-1 | 6.907e-1 | -1.746       | 12.047 | 1.294e-1 | 1.385e-1 | 1.505          | 11.806 | 9.626e-6 | 2.727e-6  |                         |     |       |       |    |    |    |   |   |   |   |  |

Show detected proteins only  
 Show all proteins  
 Filter by category:

Proteins found: 1424

Enter (or paste) list of ORFs

Find ORFs

Test Cutoff

q-Value p-Value

.005

Dot Plots

| Signif | Direction | Applies To   |
|--------|-----------|--------------|
| yes    | +         | ratios, bars |
| no     | n/a       | bars         |
| yes    | -         | ratios, bars |
| yes    | +         | p-, q-Values |
| yes    | -         | p-, q-Values |

FnPg vs Fn —  
 FnPgSg vs Fn —  
 FnSg vs FnPg —  
 FnPgSg vs FnSg —



Fn Summary Table

FnPg vs Fn

FnSg vs Fn

FnPgSg vs Fn

FnPgSg vs FnPg

FnSg vs FnPg

FnPgSg vs FnSg

Fn Coverage

| ORF           | FnPg vs Fn                                                       |        |          |          | FnSg vs Fn |        |          |          | FnPgSg vs Fn |        |          |          | FnPgSg vs FnPg |        |          |          | FnSg vs FnPg |        |          |          | FnPgSg vs FnSg |        |          |          | Log <sub>2</sub> Ratios |     |       |       |    |    |    |   |   |   |   |  |  |  |  |  |  |  |
|---------------|------------------------------------------------------------------|--------|----------|----------|------------|--------|----------|----------|--------------|--------|----------|----------|----------------|--------|----------|----------|--------------|--------|----------|----------|----------------|--------|----------|----------|-------------------------|-----|-------|-------|----|----|----|---|---|---|---|--|--|--|--|--|--|--|
|               | Ratio                                                            | Sum    | q-Val    | p-Val    | Ratio      | Sum    | q-Val    | p-Val    | Ratio        | Sum    | q-Val    | p-Val    | Ratio          | Sum    | q-Val    | p-Val    | Ratio        | Sum    | q-Val    | p-Val    | Ratio          | Sum    | q-Val    | p-Val    | Ratio                   | Sum | q-Val | p-Val | -6 | -4 | -2 | 0 | 2 | 4 | 6 |  |  |  |  |  |  |  |
| <b>FN1670</b> | -1.175                                                           | 11.013 | 1.198e-3 | 6.347e-4 | -1.179     | 11.194 | 6.02e-5  | 7.896e-5 | -1.431       | 10.553 | 5.101e-5 | 4.216e-5 | -0.256         | 9.582  | 8.4e-2   | 1.675e-1 | -0.004       | 10.019 | 4.282e-1 | 9.776e-1 | -0.252         | 9.763  | 5.485e-2 | 2.474e-1 |                         |     |       |       |    |    |    |   |   |   |   |  |  |  |  |  |  |  |
|               | AAL93785.1   Choline kinase                                      |        |          |          |            |        |          |          |              |        |          |          |                |        |          |          |              |        |          |          |                |        |          |          |                         |     |       |       |    |    |    |   |   |   |   |  |  |  |  |  |  |  |
| <b>FN1671</b> |                                                                  |        |          |          |            |        |          |          |              |        |          |          |                |        |          |          |              |        |          |          |                |        |          |          |                         |     |       |       |    |    |    |   |   |   |   |  |  |  |  |  |  |  |
|               | AAL93786.1   hypothetical exported protein                       |        |          |          |            |        |          |          |              |        |          |          |                |        |          |          |              |        |          |          |                |        |          |          |                         |     |       |       |    |    |    |   |   |   |   |  |  |  |  |  |  |  |
| <b>FN1676</b> |                                                                  |        |          |          |            |        |          |          |              |        |          |          |                |        |          |          |              |        |          |          |                |        |          |          |                         |     |       |       |    |    |    |   |   |   |   |  |  |  |  |  |  |  |
|               | AAL93791.1   Transposase                                         |        |          |          |            |        |          |          |              |        |          |          |                |        |          |          |              |        |          |          |                |        |          |          |                         |     |       |       |    |    |    |   |   |   |   |  |  |  |  |  |  |  |
| <b>FN1679</b> | 0.384                                                            | 17.222 | 8.534e-2 | 1.851e-1 | 0.683      | 17.706 | 1.196e-4 | 1.972e-4 | 0.061        | 16.695 | 9.283e-2 | 5.17e-1  | -0.323         | 17.283 | 1.052e-1 | 2.385e-1 | 0.299        | 18.089 | 1.499e-1 | 1.9e-1   | -0.622         | 17.766 | 2.498e-4 | 3.005e-4 |                         |     |       |       |    |    |    |   |   |   |   |  |  |  |  |  |  |  |
|               | AAL93794.1   LPS biosynthesis protein WbpG                       |        |          |          |            |        |          |          |              |        |          |          |                |        |          |          |              |        |          |          |                |        |          |          |                         |     |       |       |    |    |    |   |   |   |   |  |  |  |  |  |  |  |
| <b>FN1683</b> | -1.996                                                           | 11.806 | 1.071e-4 | 1.503e-5 | -1.444     | 12.543 | 3.667e-5 | 3.829e-5 | -1.101       | 12.498 | 1.248e-3 | 3.237e-3 | 0.896          | 10.706 | 4.808e-2 | 7.497e-2 | 0.552        | 10.547 | 8.934e-2 | 6.837e-2 | 0.343          | 11.442 | 7.21e-2  | 3.357e-1 |                         |     |       |       |    |    |    |   |   |   |   |  |  |  |  |  |  |  |
|               | AAL93798.1   Acetyltransferase                                   |        |          |          |            |        |          |          |              |        |          |          |                |        |          |          |              |        |          |          |                |        |          |          |                         |     |       |       |    |    |    |   |   |   |   |  |  |  |  |  |  |  |
| <b>FN1684</b> | 0.315                                                            | 16.924 | 1.126e-1 | 2.633e-1 | -0.478     | 16.316 | 1.065e-2 | 5.019e-2 | 0.149        | 16.554 | 8.54e-3  | 3.426e-2 | -0.166         | 17.072 | 1.777e-1 | 5.042e-1 | -0.793       | 16.631 | 7.831e-2 | 5.166e-2 | 0.626          | 16.464 | 5.469e-3 | 1.683e-2 |                         |     |       |       |    |    |    |   |   |   |   |  |  |  |  |  |  |  |
|               | AAL93799.1   N-acetylneuraminate synthase                        |        |          |          |            |        |          |          |              |        |          |          |                |        |          |          |              |        |          |          |                |        |          |          |                         |     |       |       |    |    |    |   |   |   |   |  |  |  |  |  |  |  |
| <b>FN1685</b> | -0.127                                                           | 12.373 | 2.538e-1 | 7.584e-1 | -0.582     | 12.102 | 5.844e-3 | 2.477e-2 | -0.397       | 11.898 | 1.175e-2 | 4.947e-2 | -0.271         | 11.975 | 1.921e-1 | 5.627e-1 | -0.455       | 11.975 | 2.275e-1 | 3.784e-1 | 0.185          | 11.704 | 1.554e-2 | 5.879e-2 |                         |     |       |       |    |    |    |   |   |   |   |  |  |  |  |  |  |  |
|               | AAL93800.1   dTDP-4-dehydrorhamnose reductase                    |        |          |          |            |        |          |          |              |        |          |          |                |        |          |          |              |        |          |          |                |        |          |          |                         |     |       |       |    |    |    |   |   |   |   |  |  |  |  |  |  |  |
| <b>FN1686</b> | 0.226                                                            | 15.857 | 2.062e-1 | 5.79e-1  | 0.013      | 15.829 | 1.43e-1  | 8.869e-1 | 0.065        | 15.493 | 1.181e-1 | 6.782e-1 | -0.161         | 15.922 | 2.246e-1 | 6.942e-1 | -0.213       | 16.055 | 3.157e-1 | 6.022e-1 | 0.052          | 15.894 | 1.496e-1 | 7.61e-1  |                         |     |       |       |    |    |    |   |   |   |   |  |  |  |  |  |  |  |
|               | AAL93801.1   Spore coat polysaccharide biosynthesis protein spsF |        |          |          |            |        |          |          |              |        |          |          |                |        |          |          |              |        |          |          |                |        |          |          |                         |     |       |       |    |    |    |   |   |   |   |  |  |  |  |  |  |  |
| <b>FN1687</b> | -0.251                                                           | 15.505 | 7.081e-2 | 1.448e-1 | -0.434     | 15.507 | 1.237e-2 | 5.971e-2 | -0.132       | 15.420 | 7.712e-2 | 4.193e-1 | 0.119          | 15.373 | 1.23e-1  | 3.015e-1 | -0.183       | 15.256 | 1.884e-1 | 2.837e-1 | 0.302          | 15.375 | 3.05e-2  | 1.269e-1 |                         |     |       |       |    |    |    |   |   |   |   |  |  |  |  |  |  |  |
|               | AAL93802.1   Gluconate 5-dehydrogenase                           |        |          |          |            |        |          |          |              |        |          |          |                |        |          |          |              |        |          |          |                |        |          |          |                         |     |       |       |    |    |    |   |   |   |   |  |  |  |  |  |  |  |
| <b>FN1688</b> | 1.263                                                            | 13.004 | 9.311e-2 | 2.07e-1  | -0.403     | 11.523 | 5.263e-3 | 2.194e-2 | 0.776        | 12.314 | 4.389e-5 | 3.388e-5 | -0.486         | 13.781 | 1.738e-1 | 4.888e-1 | -1.666       | 12.786 | 1.371e-1 | 1.559e-1 | 1.180          | 12.300 | 2.947e-4 | 3.771e-4 |                         |     |       |       |    |    |    |   |   |   |   |  |  |  |  |  |  |  |
|               | AAL93803.1   Oxidoreductase                                      |        |          |          |            |        |          |          |              |        |          |          |                |        |          |          |              |        |          |          |                |        |          |          |                         |     |       |       |    |    |    |   |   |   |   |  |  |  |  |  |  |  |
| <b>FN1689</b> | -0.982                                                           | 17.502 | 4.804e-5 | 4.446e-6 | -1.273     | 17.395 | 6.858e-6 | 3.251e-6 | -0.178       | 18.102 | 1.501e-3 | 4.217e-3 | 0.804          | 17.324 | 1.119e-3 | 2.917e-4 | -0.291       | 16.414 | 5.993e-2 | 3.134e-2 | 1.095          | 17.218 | 1.834e-4 | 1.941e-4 |                         |     |       |       |    |    |    |   |   |   |   |  |  |  |  |  |  |  |
|               | AAL93804.1   UDP-N-acetylglucosamine 4,6-dehydratase             |        |          |          |            |        |          |          |              |        |          |          |                |        |          |          |              |        |          |          |                |        |          |          |                         |     |       |       |    |    |    |   |   |   |   |  |  |  |  |  |  |  |
| <b>FN1690</b> | -0.698                                                           | 11.765 | 3.028e-2 | 4.573e-2 | -0.929     | 11.719 | 4.889e-4 | 1.191e-3 | -1.672       | 10.587 | 3.332e-5 | 2.057e-5 | -0.975         | 10.093 | 4.943e-2 | 7.816e-2 | -0.231       | 11.021 | 2.826e-1 | 5.143e-1 | -0.743         | 10.046 | 5.163e-3 | 1.566e-2 |                         |     |       |       |    |    |    |   |   |   |   |  |  |  |  |  |  |  |
|               | AAL93805.1   Hypothetical protein                                |        |          |          |            |        |          |          |              |        |          |          |                |        |          |          |              |        |          |          |                |        |          |          |                         |     |       |       |    |    |    |   |   |   |   |  |  |  |  |  |  |  |
| <b>FN1692</b> | -1.382                                                           | 11.280 | 6.028e-4 | 2.042e-4 | -0.777     | 12.069 | 4.528e-4 | 1.079e-3 | -0.883       | 11.575 | 7.625e-3 | 3e-2     | 0.499          | 10.397 | 1.218e-1 | 2.969e-1 | 0.605        | 10.687 | 1.438e-3 | 6.615e-5 | -0.106         | 11.186 | 1.502e-1 | 7.645e-1 |                         |     |       |       |    |    |    |   |   |   |   |  |  |  |  |  |  |  |
|               | AAL93807.1   Glycosyl transferase                                |        |          |          |            |        |          |          |              |        |          |          |                |        |          |          |              |        |          |          |                |        |          |          |                         |     |       |       |    |    |    |   |   |   |   |  |  |  |  |  |  |  |
| <b>FN1693</b> | -0.295                                                           | 8.291  | 1.261e-1 | 3.04e-1  | -0.842     | 7.929  | 1.27e-3  | 3.976e-3 | -0.112       | 8.271  | 1.084e-1 | 6.151e-1 | 0.183          | 8.180  | 1.997e-1 | 5.95e-1  | -0.547       | 7.634  | 1.491e-1 | 1.877e-1 | 0.730          | 7.817  | 1.56e-2  | 5.904e-2 |                         |     |       |       |    |    |    |   |   |   |   |  |  |  |  |  |  |  |
|               | AAL93808.1   Hypothetical protein                                |        |          |          |            |        |          |          |              |        |          |          |                |        |          |          |              |        |          |          |                |        |          |          |                         |     |       |       |    |    |    |   |   |   |   |  |  |  |  |  |  |  |
| <b>FN1694</b> | -1.263                                                           | 12.735 | 6.092e-3 | 5.943e-3 | -1.700     | 12.483 | 1.062e-5 | 6.429e-6 | -0.393       | 13.401 | 3.491e-5 | 2.253e-5 | 0.870          | 12.342 | 2.391e-2 | 2.733e-2 | -0.437       | 11.220 | 1.945e-1 | 3.001e-1 | 1.307          | 12.090 | 2.917e-5 | 1.558e-5 |                         |     |       |       |    |    |    |   |   |   |   |  |  |  |  |  |  |  |
|               | AAL93809.1   UDP-N-acetyl-D-quinovosamine 4-epimerase            |        |          |          |            |        |          |          |              |        |          |          |                |        |          |          |              |        |          |          |                |        |          |          |                         |     |       |       |    |    |    |   |   |   |   |  |  |  |  |  |  |  |
| <b>FN1695</b> | -1.327                                                           | 8.752  | 3.036e-3 | 2.28e-3  | -0.820     | 9.444  | 1.831e-3 | 6.132e-3 | 0.292        | 10.167 | 2.494e-2 | 1.159e-1 | 1.619          | 9.044  | 2.539e-3 | 9.623e-4 | 0.507        | 8.117  | 1.551e-1 | 2.027e-1 | 1.111          | 9.736  | 1.35e-3  | 2.833e-3 |                         |     |       |       |    |    |    |   |   |   |   |  |  |  |  |  |  |  |
|               | AAL93810.1   Probable quinovosaminophosphotransferase            |        |          |          |            |        |          |          |              |        |          |          |                |        |          |          |              |        |          |          |                |        |          |          |                         |     |       |       |    |    |    |   |   |   |   |  |  |  |  |  |  |  |
| <b>FN1696</b> | -0.164                                                           | 14.848 | 1.569e-1 | 4.028e-1 | 0.243      | 15.439 | 1.068e-2 | 5.038e-2 | -0.144       | 14.664 | 1.379e-2 | 5.92e-2  | 0.020          | 14.703 | 2.774e-1 | 9.202e-1 | 0.407        | 15.275 | 9.183e-2 | 7.259e-2 | -0.387         | 15.295 | 3.749e-3 | 1.021e-2 |                         |     |       |       |    |    |    |   |   |   |   |  |  |  |  |  |  |  |
|               | AAL93811.1   UDP-N-acetylglucosamine 4,6-dehydratase             |        |          |          |            |        |          |          |              |        |          |          |                |        |          |          |              |        |          |          |                |        |          |          |                         |     |       |       |    |    |    |   |   |   |   |  |  |  |  |  |  |  |

Show detected proteins only  
 Show all proteins  
 Filter by category:

Proteins found: 1424

Enter (or paste) list of ORFs

Find ORFs

Test Cutoff

q-Value .005

p-Value

Dot Plots

| Signif | Direction | Applies To   |
|--------|-----------|--------------|
| yes    | +         | ratios, bars |
| no     | n/a       | bars         |
| yes    | -         | ratios, bars |
| yes    | +         | p-, q-Values |
| yes    | -         | p-, q-Values |



Fn Summary Table   FnPg vs Fn   FnSg vs Fn   FnPgSg vs Fn   FnPgSg vs FnPg   FnSg vs FnPg   FnPgSg vs FnSg   Fn Coverage

| ORF                                                    | FnPg vs Fn    |        |          |          | FnSg vs Fn    |        |          |          | FnPgSg vs Fn  |        |          |          | FnPgSg vs FnPg |        |          |          | FnSg vs FnPg |        |          |          | FnPgSg vs FnSg |        |          |          | Log <sub>2</sub> Ratios |     |       |       |    |    |    |   |   |   |   |  |  |  |  |  |  |  |  |  |  |
|--------------------------------------------------------|---------------|--------|----------|----------|---------------|--------|----------|----------|---------------|--------|----------|----------|----------------|--------|----------|----------|--------------|--------|----------|----------|----------------|--------|----------|----------|-------------------------|-----|-------|-------|----|----|----|---|---|---|---|--|--|--|--|--|--|--|--|--|--|
|                                                        | Ratio         | Sum    | q-Val    | p-Val    | Ratio         | Sum    | q-Val    | p-Val    | Ratio         | Sum    | q-Val    | p-Val    | Ratio          | Sum    | q-Val    | p-Val    | Ratio        | Sum    | q-Val    | p-Val    | Ratio          | Sum    | q-Val    | p-Val    | Ratio                   | Sum | q-Val | p-Val | -6 | -4 | -2 | 0 | 2 | 4 | 6 |  |  |  |  |  |  |  |  |  |  |
| <b>FN1697</b>                                          | -1.012        | 14.080 | 1.832e-2 | 2.416e-2 | <b>-0.736</b> | 14.540 | 1.497e-3 | 4.847e-3 | <b>-1.167</b> | 13.721 | 6.157e-4 | 1.301e-3 | -0.155         | 12.913 | 2.349e-1 | 7.36e-1  | 0.276        | 13.528 | 2.76e-1  | 4.976e-1 | <b>-0.430</b>  | 13.373 | 4.397e-3 | 1.269e-2 |                         |     |       |       |    |    |    |   |   |   |   |  |  |  |  |  |  |  |  |  |  |
| AAL93812.1   Hypothetical protein                      |               |        |          |          |               |        |          |          |               |        |          |          |                |        |          |          |              |        |          |          |                |        |          |          |                         |     |       |       |    |    |    |   |   |   |   |  |  |  |  |  |  |  |  |  |  |
| <b>FN1698</b>                                          | 0.660         | 13.812 | 6.211e-2 | 1.22e-1  | <b>1.236</b>  | 14.573 | 1.44e-4  | 2.542e-4 | -0.074        | 12.875 | 1.006e-1 | 5.662e-1 | -0.733         | 13.739 | 5.955e-2 | 1.036e-1 | 0.576        | 15.233 | 8.787e-2 | 6.597e-2 | <b>-1.310</b>  | 14.499 | 5.128e-5 | 3.6e-5   |                         |     |       |       |    |    |    |   |   |   |   |  |  |  |  |  |  |  |  |  |  |
| AAL93813.1   dTDP-4-dehydrohamnose reductase           |               |        |          |          |               |        |          |          |               |        |          |          |                |        |          |          |              |        |          |          |                |        |          |          |                         |     |       |       |    |    |    |   |   |   |   |  |  |  |  |  |  |  |  |  |  |
| <b>FN1700</b>                                          |               |        |          |          | -1.688        | 5.619  |          |          |               |        |          |          |                |        |          |          |              |        |          |          |                |        |          |          |                         |     |       |       |    |    |    |   |   |   |   |  |  |  |  |  |  |  |  |  |  |
| AAL93815.1   Hypothetical protein                      |               |        |          |          |               |        |          |          |               |        |          |          |                |        |          |          |              |        |          |          |                |        |          |          |                         |     |       |       |    |    |    |   |   |   |   |  |  |  |  |  |  |  |  |  |  |
| <b>FN1701</b>                                          | <b>-0.897</b> | 11.336 | 3.076e-3 | 2.325e-3 | -0.217        | 12.200 | 1.37e-2  | 6.722e-2 | <b>-1.255</b> | 10.774 | 1.84e-5  | 8.057e-6 | -0.358         | 10.081 | 5.329e-2 | 8.782e-2 | 0.680        | 11.303 | 1.601e-2 | 3.37e-3  | <b>-1.038</b>  | 10.946 | 1.166e-3 | 2.371e-3 |                         |     |       |       |    |    |    |   |   |   |   |  |  |  |  |  |  |  |  |  |  |
| AAL93816.1   ABC transporter ATP-binding protein       |               |        |          |          |               |        |          |          |               |        |          |          |                |        |          |          |              |        |          |          |                |        |          |          |                         |     |       |       |    |    |    |   |   |   |   |  |  |  |  |  |  |  |  |  |  |
| <b>FN1703</b>                                          | -0.139        | 14.496 | 2.479e-1 | 7.349e-1 | -0.011        | 14.808 | 1.465e-1 | 9.123e-1 | <b>-0.918</b> | 13.513 | 3.033e-5 | 1.73e-5  | -0.779         | 13.578 | 1.007e-1 | 2.219e-1 | 0.128        | 14.669 | 3.682e-1 | 7.608e-1 | <b>-0.907</b>  | 13.890 | 1.637e-3 | 3.608e-3 |                         |     |       |       |    |    |    |   |   |   |   |  |  |  |  |  |  |  |  |  |  |
| AAL93818.1   ADP-L-glycero-D-manno-heptose-6-epimerase |               |        |          |          |               |        |          |          |               |        |          |          |                |        |          |          |              |        |          |          |                |        |          |          |                         |     |       |       |    |    |    |   |   |   |   |  |  |  |  |  |  |  |  |  |  |
| <b>FN1704</b>                                          | -1.213        | 7.629  | 9.445e-3 | 1.06e-2  | <b>-0.812</b> | 8.215  | 4.075e-5 | 4.509e-5 | -1.512        | 7.127  |          |          | -0.299         | 6.117  |          |          | 0.401        | 7.002  | 1.814e-1 | 2.657e-1 | -0.700         | 6.703  |          |          |                         |     |       |       |    |    |    |   |   |   |   |  |  |  |  |  |  |  |  |  |  |
| AAL93819.1   Serine protease                           |               |        |          |          |               |        |          |          |               |        |          |          |                |        |          |          |              |        |          |          |                |        |          |          |                         |     |       |       |    |    |    |   |   |   |   |  |  |  |  |  |  |  |  |  |  |
| <b>FN1707</b>                                          |               |        |          |          |               |        |          |          |               |        |          |          |                |        |          |          |              |        |          |          |                |        |          |          |                         |     |       |       |    |    |    |   |   |   |   |  |  |  |  |  |  |  |  |  |  |
| AAL93822.1   Aldose 1-epimerase                        |               |        |          |          |               |        |          |          |               |        |          |          |                |        |          |          |              |        |          |          |                |        |          |          |                         |     |       |       |    |    |    |   |   |   |   |  |  |  |  |  |  |  |  |  |  |
| <b>FN1708</b>                                          | <b>-0.861</b> | 18.285 | 2.669e-5 | 1.839e-6 | <b>-0.649</b> | 18.681 | 3.79e-7  | 4.189e-8 | <b>-0.504</b> | 18.437 | 5.877e-6 | 1.441e-6 | <b>0.356</b>   | 17.781 | 5.334e-4 | 9.817e-5 | 0.212        | 17.821 | 1.129e-2 | 2.045e-3 | <b>0.145</b>   | 18.177 | 1.074e-3 | 2.131e-3 |                         |     |       |       |    |    |    |   |   |   |   |  |  |  |  |  |  |  |  |  |  |
| AAL93823.1   Polyribonucleotide nucleotidyltransferase |               |        |          |          |               |        |          |          |               |        |          |          |                |        |          |          |              |        |          |          |                |        |          |          |                         |     |       |       |    |    |    |   |   |   |   |  |  |  |  |  |  |  |  |  |  |
| <b>FN1711</b>                                          |               |        |          |          |               |        |          |          | <b>-2.157</b> | 5.706  | 2.347e-6 | 4.111e-7 |                |        |          |          |              |        |          |          |                |        |          |          |                         |     |       |       |    |    |    |   |   |   |   |  |  |  |  |  |  |  |  |  |  |
| AAL93826.1   Methyltransferase                         |               |        |          |          |               |        |          |          |               |        |          |          |                |        |          |          |              |        |          |          |                |        |          |          |                         |     |       |       |    |    |    |   |   |   |   |  |  |  |  |  |  |  |  |  |  |
| <b>FN1713</b>                                          | 0.483         | 6.436  |          |          | 1.188         | 7.325  |          |          |               |        |          |          |                |        |          |          | 0.705        | 7.808  |          |          |                |        |          |          |                         |     |       |       |    |    |    |   |   |   |   |  |  |  |  |  |  |  |  |  |  |
| AAL93828.1   tRNA (Uracil-5-) -methyltransferase       |               |        |          |          |               |        |          |          |               |        |          |          |                |        |          |          |              |        |          |          |                |        |          |          |                         |     |       |       |    |    |    |   |   |   |   |  |  |  |  |  |  |  |  |  |  |
| <b>FN1715</b>                                          |               |        |          |          |               |        |          |          |               |        |          |          |                |        |          |          | 1.695        | 5.050  |          |          |                |        |          |          |                         |     |       |       |    |    |    |   |   |   |   |  |  |  |  |  |  |  |  |  |  |
| AAL93830.1   ATPase                                    |               |        |          |          |               |        |          |          |               |        |          |          |                |        |          |          |              |        |          |          |                |        |          |          |                         |     |       |       |    |    |    |   |   |   |   |  |  |  |  |  |  |  |  |  |  |
| <b>FN1716</b>                                          |               |        |          |          |               |        |          |          |               |        |          |          |                |        |          |          |              |        |          |          |                |        |          |          |                         |     |       |       |    |    |    |   |   |   |   |  |  |  |  |  |  |  |  |  |  |
| AAL93831.1   Hypothetical protein                      |               |        |          |          |               |        |          |          |               |        |          |          |                |        |          |          |              |        |          |          |                |        |          |          |                         |     |       |       |    |    |    |   |   |   |   |  |  |  |  |  |  |  |  |  |  |
| <b>FN1717</b>                                          | <b>-2.038</b> | 10.431 | 1.683e-4 | 2.964e-5 | <b>-2.513</b> | 10.140 | 1.731e-5 | 1.326e-5 | <b>-2.442</b> | 9.822  | 2.502e-4 | 3.989e-4 | -0.404         | 7.988  | 1.247e-1 | 3.078e-1 | -0.475       | 8.102  | 1.956e-1 | 3.031e-1 | 0.071          | 7.697  | 1.593e-1 | 8.197e-1 |                         |     |       |       |    |    |    |   |   |   |   |  |  |  |  |  |  |  |  |  |  |
| AAL93832.1   NAD-dependent DNA ligase                  |               |        |          |          |               |        |          |          |               |        |          |          |                |        |          |          |              |        |          |          |                |        |          |          |                         |     |       |       |    |    |    |   |   |   |   |  |  |  |  |  |  |  |  |  |  |
| <b>FN1718</b>                                          | <b>-1.083</b> | 17.982 | 2.449e-4 | 5.252e-5 | <b>-1.084</b> | 18.165 | 3.61e-4  | 8.134e-4 | <b>-0.953</b> | 17.908 | 2.743e-4 | 4.488e-4 | 0.130          | 17.029 | 1.095e-1 | 2.543e-1 | -0.001       | 17.082 | 4.314e-1 | 9.907e-1 | 0.131          | 17.212 | 1.109e-2 | 3.973e-2 |                         |     |       |       |    |    |    |   |   |   |   |  |  |  |  |  |  |  |  |  |  |
| AAL93833.1   Protein translocase subunit secA          |               |        |          |          |               |        |          |          |               |        |          |          |                |        |          |          |              |        |          |          |                |        |          |          |                         |     |       |       |    |    |    |   |   |   |   |  |  |  |  |  |  |  |  |  |  |
| <b>FN1719</b>                                          | <b>-0.539</b> | 16.963 | 1.975e-3 | 1.266e-3 | -0.008        | 17.678 | 1.521e-1 | 9.536e-1 | <b>-0.715</b> | 16.583 | 3.33e-5  | 2.054e-5 | -0.176         | 16.248 | 7.711e-2 | 1.479e-1 | 0.530        | 17.139 | 6.164e-2 | 3.289e-2 | -0.707         | 16.963 | 6.007e-3 | 1.898e-2 |                         |     |       |       |    |    |    |   |   |   |   |  |  |  |  |  |  |  |  |  |  |
| AAL93834.1   Hypothetical protein                      |               |        |          |          |               |        |          |          |               |        |          |          |                |        |          |          |              |        |          |          |                |        |          |          |                         |     |       |       |    |    |    |   |   |   |   |  |  |  |  |  |  |  |  |  |  |
| <b>FN1722</b>                                          |               |        |          |          | -0.891        | 4.856  | 9.382e-3 | 4.335e-2 |               |        |          |          |                |        |          |          |              |        |          |          |                |        |          |          |                         |     |       |       |    |    |    |   |   |   |   |  |  |  |  |  |  |  |  |  |  |
| AAL93837.1   Glucose inhibited division protein B      |               |        |          |          |               |        |          |          |               |        |          |          |                |        |          |          |              |        |          |          |                |        |          |          |                         |     |       |       |    |    |    |   |   |   |   |  |  |  |  |  |  |  |  |  |  |
| <b>FN1723</b>                                          | <b>-1.008</b> | 12.769 | 4.075e-3 | 3.41e-3  | <b>-0.775</b> | 13.186 | 1.12e-3  | 3.41e-3  | -0.389        | 13.184 | 8.235e-3 | 3.282e-2 | 0.619          | 12.380 | 8.064e-3 | 5.4e-3   | 0.233        | 12.178 | 1.456e-1 | 1.778e-1 | 0.386          | 12.797 | 1.054e-2 | 3.733e-2 |                         |     |       |       |    |    |    |   |   |   |   |  |  |  |  |  |  |  |  |  |  |
| AAL93838.1   Glucose inhibited division protein A      |               |        |          |          |               |        |          |          |               |        |          |          |                |        |          |          |              |        |          |          |                |        |          |          |                         |     |       |       |    |    |    |   |   |   |   |  |  |  |  |  |  |  |  |  |  |

Show detected proteins only

Show all proteins

Filter by category:

GO: amino acid transport

Proteins found: 1424

Enter (or paste) list of ORFs

Find ORFs

Test

q-Value

p-Value

Cutoff

.005

Dot Plots

Dot Plots

| Signif | Direction | Applies To   |
|--------|-----------|--------------|
| yes    | +         | ratios, bars |
| no     | n/a       | bars         |
| yes    | -         | ratios, bars |
| yes    | +         | p-, q-Values |
| yes    | -         | p-, q-Values |

FnPg vs Fn

FnPgSg vs Fn

FnSg vs FnPg

FnSg vs Fn

FnPgSg vs FnPg

FnPgSg vs FnSg

Fn Summary Table

FnPg vs Fn

FnSg vs Fn

FnPgSg vs Fn

FnPgSg vs FnPg

FnSg vs FnPg

FnPgSg vs FnSg

Fn Coverage

| ORF                                                                    | FnPg vs Fn |        |          |          | FnSg vs Fn |        |          |          | FnPgSg vs Fn |        |          |          | FnPgSg vs FnPg |        |          |          | FnSg vs FnPg |        |          |          | FnPgSg vs FnSg |        |          |          | Log <sub>2</sub> Ratios |     |       |       |    |    |    |   |   |   |   |  |
|------------------------------------------------------------------------|------------|--------|----------|----------|------------|--------|----------|----------|--------------|--------|----------|----------|----------------|--------|----------|----------|--------------|--------|----------|----------|----------------|--------|----------|----------|-------------------------|-----|-------|-------|----|----|----|---|---|---|---|--|
|                                                                        | Ratio      | Sum    | q-Val    | p-Val    | Ratio      | Sum    | q-Val    | p-Val    | Ratio        | Sum    | q-Val    | p-Val    | Ratio          | Sum    | q-Val    | p-Val    | Ratio        | Sum    | q-Val    | p-Val    | Ratio          | Sum    | q-Val    | p-Val    | Ratio                   | Sum | q-Val | p-Val | -6 | -4 | -2 | 0 | 2 | 4 | 6 |  |
| <b>FN1724</b><br>AAL93839.1   Potassium uptake protein KtrA            | 0.576      | 8.057  |          |          | 1.009      | 8.673  |          |          | -0.577       | 6.699  |          |          | -1.154         | 7.479  | 1.061e-1 | 2.421e-1 | 0.432        | 9.250  | 2.942e-1 | 5.443e-1 | -1.586         | 8.096  | 2.555e-2 | 1.04e-1  |                         |     |       |       |    |    |    |   |   |   |   |  |
| <b>FN1727</b><br>AAL93842.1   Chloride channel protein                 |            |        |          |          |            |        |          |          |              |        |          |          |                |        |          |          |              |        |          |          | -0.318         | 5.086  |          |          |                         |     |       |       |    |    |    |   |   |   |   |  |
| <b>FN1728</b><br>AAL93843.1   Pyrrolidone-carboxylate peptidase        | -0.386     | 8.629  | 1.038e-3 | 4.983e-4 | -1.320     | 7.878  | 3.995e-6 | 1.353e-6 | -1.893       | 6.917  | 2.063e-6 | 3.481e-7 | -1.508         | 6.735  | 8.793e-5 | 6.524e-6 | -0.935       | 7.493  | 6.035e-4 | 8.891e-6 | -0.573         | 5.985  | 1.109e-3 | 2.227e-3 |                         |     |       |       |    |    |    |   |   |   |   |  |
| <b>FN1730</b><br>AAL93845.1   Para-aminobenzoate synthase component I  | -0.644     | 8.109  | 2.431e-2 | 3.463e-2 | 0.233      | 9.170  | 2.828e-3 | 1.042e-2 | -1.332       | 7.217  |          |          | -0.688         | 6.777  |          |          | 0.876        | 8.526  | 3.813e-2 | 1.386e-2 | -1.565         | 7.838  |          |          |                         |     |       |       |    |    |    |   |   |   |   |  |
| <b>FN1731</b><br>AAL93846.1   Anthranilate synthase component II       |            |        |          |          |            |        |          |          |              |        |          |          | 0.965          | 7.239  |          |          | -0.441       | 6.017  | 3.786e-2 | 1.37e-2  | 1.407          | 6.982  |          |          |                         |     |       |       |    |    |    |   |   |   |   |  |
| <b>FN1732</b><br>AAL93847.1   Hypothetical protein                     | 0.941      | 10.311 | 6.894e-2 | 1.399e-1 | 1.181      | 10.736 | 1.07e-3  | 3.228e-3 | -0.305       | 8.862  | 6.336e-2 | 3.367e-1 | -1.246         | 10.006 | 5.457e-2 | 9.121e-2 | 0.240        | 11.677 | 2.866e-1 | 5.244e-1 | -1.486         | 10.431 | 6.47e-4  | 1.081e-3 |                         |     |       |       |    |    |    |   |   |   |   |  |
| <b>FN1733</b><br>AAL93848.1   V-type sodium ATP synthase subunit D     |            |        |          |          |            |        |          |          |              |        |          |          |                |        |          |          | 0.983        | 7.168  |          |          |                |        |          |          |                         |     |       |       |    |    |    |   |   |   |   |  |
| <b>FN1734</b><br>AAL93849.1   V-type sodium ATP synthase subunit B     | 0.411      | 13.885 | 1.689e-3 | 1.008e-3 | 0.735      | 14.394 | 8.88e-5  | 1.348e-4 | 0.282        | 13.552 | 2.984e-2 | 1.427e-1 | -0.129         | 14.167 | 1.446e-1 | 3.821e-1 | 0.324        | 14.804 | 4.872e-3 | 5.482e-4 | -0.453         | 14.675 | 6.476e-3 | 2.077e-2 |                         |     |       |       |    |    |    |   |   |   |   |  |
| <b>FN1735</b><br>AAL93850.1   V-type sodium ATP synthase subunit A     | 0.738      | 12.791 | 8.608e-2 | 1.872e-1 | 1.703      | 13.940 | 3.393e-5 | 3.414e-5 | -0.552       | 11.297 | 1.147e-3 | 2.875e-3 | -1.290         | 12.238 | 5.271e-2 | 8.632e-2 | 0.965        | 14.678 | 5.033e-2 | 2.297e-2 | -2.255         | 13.388 | 7.896e-5 | 6.329e-5 |                         |     |       |       |    |    |    |   |   |   |   |  |
| <b>FN1736</b><br>AAL93851.1   V-type sodium ATP synthase subunit A     | 1.129      | 8.712  | 3.761e-2 | 6.075e-2 | 1.958      | 9.725  | 3.525e-5 | 3.611e-5 | -0.692       | 6.687  | 3.585e-4 | 6.464e-4 | -1.821         | 8.019  | 2.54e-2  | 2.981e-2 | 0.829        | 10.854 | 4.839e-2 | 2.131e-2 | -2.650         | 9.033  | 1.827e-5 | 7.893e-6 |                         |     |       |       |    |    |    |   |   |   |   |  |
| <b>FN1737</b><br>AAL93852.1   V-type sodium ATP synthase subunit G     | -0.822     | 5.498  | 5.269e-2 | 9.624e-2 | 0.730      | 7.235  | 8.316e-3 | 3.755e-2 |              |        |          |          |                |        |          |          | 1.553        | 6.413  | 3.046e-3 | 2.633e-4 |                |        |          |          |                         |     |       |       |    |    |    |   |   |   |   |  |
| <b>FN1738</b><br>AAL93853.1   V-type sodium ATP synthase subunit C     | 1.946      | 11.018 | 3.79e-2  | 6.138e-2 | 1.818      | 11.075 | 9.609e-5 | 1.487e-4 | -0.713       | 8.155  | 3.759e-3 | 1.291e-2 | -2.659         | 10.305 | 3.368e-2 | 4.519e-2 | -0.128       | 13.021 | 3.688e-1 | 7.629e-1 | -2.531         | 10.361 | 1.929e-4 | 2.079e-4 |                         |     |       |       |    |    |    |   |   |   |   |  |
| <b>FN1739</b><br>AAL93854.1   V-type sodium ATP synthase subunit E     | 0.306      | 5.733  |          |          | -0.103     | 5.508  |          |          | 1.461        | 6.684  |          |          | 1.155          | 7.194  | 8.725e-7 | 7.771e-9 | -0.410       | 5.814  |          |          | 1.565          | 6.969  |          |          |                         |     |       |       |    |    |    |   |   |   |   |  |
| <b>FN1740</b><br>AAL93855.1   V-type sodium ATP synthase subunit K     |            |        |          |          |            |        |          |          |              |        |          |          |                |        |          |          | -0.791       | 14.457 |          |          |                |        |          |          |                         |     |       |       |    |    |    |   |   |   |   |  |
| <b>FN1741</b><br>AAL93856.1   V-type sodium ATP synthase subunit I     | 0.670      | 9.257  | 8.139e-3 | 8.846e-3 | 0.833      | 9.603  | 2.926e-5 | 2.772e-5 | -1.416       | 6.966  | 4.968e-5 | 4.052e-5 | -2.087         | 7.840  | 2.797e-3 | 1.105e-3 | 0.162        | 10.274 | 1.494e-1 | 1.884e-1 | -2.249         | 8.187  | 3.242e-7 | 2.611e-8 |                         |     |       |       |    |    |    |   |   |   |   |  |
| <b>FN1742</b><br>AAL93857.1   V-type sodium ATP synthase subunit G     |            |        |          |          |            |        |          |          |              |        |          |          |                |        |          |          |              |        |          |          |                |        |          |          |                         |     |       |       |    |    |    |   |   |   |   |  |
| <b>FN1743</b><br>AAL93858.1   Multidrug-efflux transporter 2 regulator |            |        |          |          |            |        |          |          |              |        |          |          |                |        |          |          |              |        |          |          |                |        |          |          |                         |     |       |       |    |    |    |   |   |   |   |  |

Show detected proteins only  
 Show all proteins  
 Filter by category:

Proteins found: 1424

Enter (or paste) list of ORFs

Find ORFs

Test Cutoff

q-Value p-Value

.005

Dot Plots

| Signif | Direction | Applies To   |
|--------|-----------|--------------|
| yes    | +         | ratios, bars |
| no     | n/a       | bars         |
| yes    | -         | ratios, bars |
| yes    | +         | p-, q-Values |
| yes    | -         | p-, q-Values |

FnPg vs Fn — █ — FnSg vs Fn  
 FnPgSg vs Fn — █ — FnPgSg vs FnPg  
 FnSg vs FnPg — █ — FnPgSg vs FnSg

Fn Summary Table

FnPg vs Fn

FnSg vs Fn

FnPgSg vs Fn

FnPgSg vs FnPg

FnSg vs FnPg

FnPgSg vs FnSg

Fn Coverage

| ORF           | FnPg vs Fn                                                        |        |          |          | FnSg vs Fn    |        |          |          | FnPgSg vs Fn  |        |          |          | FnPgSg vs FnPg |        |          |          | FnSg vs FnPg |        |          |          | FnPgSg vs FnSg |        |          |          | Log <sub>2</sub> Ratios |     |       |       |    |    |    |   |   |   |   |  |  |  |  |  |  |  |  |  |  |  |  |
|---------------|-------------------------------------------------------------------|--------|----------|----------|---------------|--------|----------|----------|---------------|--------|----------|----------|----------------|--------|----------|----------|--------------|--------|----------|----------|----------------|--------|----------|----------|-------------------------|-----|-------|-------|----|----|----|---|---|---|---|--|--|--|--|--|--|--|--|--|--|--|--|
|               | Ratio                                                             | Sum    | q-Val    | p-Val    | Ratio         | Sum    | q-Val    | p-Val    | Ratio         | Sum    | q-Val    | p-Val    | Ratio          | Sum    | q-Val    | p-Val    | Ratio        | Sum    | q-Val    | p-Val    | Ratio          | Sum    | q-Val    | p-Val    | Ratio                   | Sum | q-Val | p-Val | -6 | -4 | -2 | 0 | 2 | 4 | 6 |  |  |  |  |  |  |  |  |  |  |  |  |
| <b>FN1745</b> | 2.072                                                             | 7.098  |          |          | <b>2.001</b>  | 7.212  | 1.028e-5 | 6.096e-6 | 0.611         | 5.434  | 2.23e-2  | 1.021e-1 | -1.461         | 7.709  |          |          | -0.070       | 9.284  |          |          | <b>-1.390</b>  | 7.823  | 8.096e-4 | 1.464e-3 |                         |     |       |       |    |    |    |   |   |   |   |  |  |  |  |  |  |  |  |  |  |  |  |
|               | AAL93860.1   Cystathionine gamma-synthase                         |        |          |          |               |        |          |          |               |        |          |          |                |        |          |          |              |        |          |          |                |        |          |          |                         |     |       |       |    |    |    |   |   |   |   |  |  |  |  |  |  |  |  |  |  |  |  |
| <b>FN1746</b> |                                                                   |        |          |          |               |        |          |          |               |        |          |          |                |        |          |          | 0.768        | 6.567  |          |          |                |        |          |          |                         |     |       |       |    |    |    |   |   |   |   |  |  |  |  |  |  |  |  |  |  |  |  |
|               | AAL93861.1   Cystathionine beta-lyase                             |        |          |          |               |        |          |          |               |        |          |          |                |        |          |          |              |        |          |          |                |        |          |          |                         |     |       |       |    |    |    |   |   |   |   |  |  |  |  |  |  |  |  |  |  |  |  |
| <b>FN1752</b> |                                                                   |        |          |          |               |        |          |          |               |        |          |          |                |        |          |          |              |        |          |          |                |        |          |          |                         |     |       |       |    |    |    |   |   |   |   |  |  |  |  |  |  |  |  |  |  |  |  |
|               | AAL93867.1   Regulatory protein TENI                              |        |          |          |               |        |          |          |               |        |          |          |                |        |          |          |              |        |          |          |                |        |          |          |                         |     |       |       |    |    |    |   |   |   |   |  |  |  |  |  |  |  |  |  |  |  |  |
| <b>FN1754</b> |                                                                   |        |          |          |               |        |          |          |               |        |          |          |                |        |          |          |              |        |          |          |                |        |          |          |                         |     |       |       |    |    |    |   |   |   |   |  |  |  |  |  |  |  |  |  |  |  |  |
|               | AAL93869.1   Thiazole biosynthesis protein thiG                   |        |          |          |               |        |          |          |               |        |          |          |                |        |          |          |              |        |          |          |                |        |          |          |                         |     |       |       |    |    |    |   |   |   |   |  |  |  |  |  |  |  |  |  |  |  |  |
| <b>FN1762</b> |                                                                   |        |          |          |               |        |          |          |               |        |          |          |                |        |          |          |              |        |          |          |                |        |          |          |                         |     |       |       |    |    |    |   |   |   |   |  |  |  |  |  |  |  |  |  |  |  |  |
|               | AAL93875.1   Protein yaaA                                         |        |          |          |               |        |          |          |               |        |          |          |                |        |          |          |              |        |          |          |                |        |          |          |                         |     |       |       |    |    |    |   |   |   |   |  |  |  |  |  |  |  |  |  |  |  |  |
| <b>FN1763</b> | 1.959                                                             | 10.009 | 1.247e-2 | 1.477e-2 | <b>2.008</b>  | 10.242 | 9.797e-6 | 5.649e-6 | -0.243        | 7.602  |          |          | -2.203         | 9.765  |          |          | 0.049        | 12.201 | 3.905e-1 | 8.363e-1 | -2.251         | 9.999  |          |          |                         |     |       |       |    |    |    |   |   |   |   |  |  |  |  |  |  |  |  |  |  |  |  |
|               | AAL93876.1   Hypothetical cytosolic protein                       |        |          |          |               |        |          |          |               |        |          |          |                |        |          |          |              |        |          |          |                |        |          |          |                         |     |       |       |    |    |    |   |   |   |   |  |  |  |  |  |  |  |  |  |  |  |  |
| <b>FN1764</b> | 0.187                                                             | 23.848 | 2.596e-1 | 7.817e-1 | <b>0.963</b>  | 24.808 | 9.803e-6 | 5.654e-6 | <b>-0.224</b> | 23.234 | 2.337e-4 | 3.655e-4 | -0.410         | 23.624 | 1.963e-1 | 5.803e-1 | 0.776        | 24.995 | 1.441e-1 | 1.735e-1 | <b>-1.186</b>  | 24.584 | 2.024e-7 | 1.149e-8 |                         |     |       |       |    |    |    |   |   |   |   |  |  |  |  |  |  |  |  |  |  |  |  |
|               | AAL93877.1   Enolase                                              |        |          |          |               |        |          |          |               |        |          |          |                |        |          |          |              |        |          |          |                |        |          |          |                         |     |       |       |    |    |    |   |   |   |   |  |  |  |  |  |  |  |  |  |  |  |  |
| <b>FN1765</b> | -1.291                                                            | 19.164 | 6.487e-3 | 6.485e-3 | <b>-0.922</b> | 19.718 | 1.549e-4 | 2.812e-4 | <b>-0.880</b> | 19.371 | 5.355e-5 | 4.511e-5 | 0.411          | 18.283 | 1.14e-1  | 2.698e-1 | 0.370        | 18.426 | 2.014e-1 | 3.161e-1 | 0.041          | 18.838 | 1.158e-1 | 5.666e-1 |                         |     |       |       |    |    |    |   |   |   |   |  |  |  |  |  |  |  |  |  |  |  |  |
|               | AAL93878.1   Pyruvate kinase                                      |        |          |          |               |        |          |          |               |        |          |          |                |        |          |          |              |        |          |          |                |        |          |          |                         |     |       |       |    |    |    |   |   |   |   |  |  |  |  |  |  |  |  |  |  |  |  |
| <b>FN1780</b> | -1.339                                                            | 8.610  | 5.36e-3  | 4.992e-3 | <b>-1.274</b> | 8.859  | 6.736e-5 | 9.32e-5  | -0.124        | 9.621  | 7.404e-2 | 4.005e-1 | 1.215          | 8.485  | 1.004e-2 | 7.598e-3 | 0.065        | 7.520  | 4.014e-1 | 8.754e-1 | <b>1.150</b>   | 8.735  | 1.46e-3  | 3.122e-3 |                         |     |       |       |    |    |    |   |   |   |   |  |  |  |  |  |  |  |  |  |  |  |  |
|               | AAL93879.1   Hypothetical protein                                 |        |          |          |               |        |          |          |               |        |          |          |                |        |          |          |              |        |          |          |                |        |          |          |                         |     |       |       |    |    |    |   |   |   |   |  |  |  |  |  |  |  |  |  |  |  |  |
| <b>FN1781</b> | -0.691                                                            | 18.542 | 1.231e-2 | 1.454e-2 | <b>-0.665</b> | 18.753 | 7.157e-5 | 1.022e-4 | <b>-0.570</b> | 18.459 | 1.946e-4 | 2.787e-4 | 0.121          | 17.972 | 1.867e-1 | 5.402e-1 | 0.027        | 18.062 | 4.073e-1 | 8.973e-1 | 0.095          | 18.183 | 5.114e-2 | 2.286e-1 |                         |     |       |       |    |    |    |   |   |   |   |  |  |  |  |  |  |  |  |  |  |  |  |
|               | AAL93880.1   LytB protein                                         |        |          |          |               |        |          |          |               |        |          |          |                |        |          |          |              |        |          |          |                |        |          |          |                         |     |       |       |    |    |    |   |   |   |   |  |  |  |  |  |  |  |  |  |  |  |  |
| <b>FN1783</b> |                                                                   |        |          |          |               |        |          |          |               |        |          |          |                |        |          |          | -0.552       | 6.552  |          |          |                |        |          |          |                         |     |       |       |    |    |    |   |   |   |   |  |  |  |  |  |  |  |  |  |  |  |  |
|               | AAL93882.1   Ethanolamine utilization protein eutJ                |        |          |          |               |        |          |          |               |        |          |          |                |        |          |          |              |        |          |          |                |        |          |          |                         |     |       |       |    |    |    |   |   |   |   |  |  |  |  |  |  |  |  |  |  |  |  |
| <b>FN1784</b> | -1.541                                                            | 8.185  |          |          | -0.466        | 9.445  | 1.392e-2 | 6.853e-2 | -2.082        | 7.441  |          |          | -0.541         | 6.103  |          |          | 1.075        | 7.903  |          |          | -1.616         | 7.363  |          |          |                         |     |       |       |    |    |    |   |   |   |   |  |  |  |  |  |  |  |  |  |  |  |  |
|               | AAL93883.1   unknown                                              |        |          |          |               |        |          |          |               |        |          |          |                |        |          |          |              |        |          |          |                |        |          |          |                         |     |       |       |    |    |    |   |   |   |   |  |  |  |  |  |  |  |  |  |  |  |  |
| <b>FN1785</b> | -1.171                                                            | 8.572  |          |          | -1.124        | 8.804  |          |          | 0.622         | 10.161 | 4.805e-2 | 2.473e-1 | 1.793          | 9.194  |          |          | 0.047        | 7.632  |          |          | 1.746          | 9.425  |          |          |                         |     |       |       |    |    |    |   |   |   |   |  |  |  |  |  |  |  |  |  |  |  |  |
|               | AAL93884.1   Hypothetical protein                                 |        |          |          |               |        |          |          |               |        |          |          |                |        |          |          |              |        |          |          |                |        |          |          |                         |     |       |       |    |    |    |   |   |   |   |  |  |  |  |  |  |  |  |  |  |  |  |
| <b>FN1786</b> | -1.607                                                            | 10.856 | 5.276e-3 | 4.89e-3  | <b>-0.867</b> | 11.781 | 8.295e-6 | 4.353e-6 | <b>-0.317</b> | 11.942 | 6.397e-4 | 1.366e-3 | 1.290          | 10.539 | 1.576e-2 | 1.535e-2 | 0.740        | 10.174 | 1.092e-1 | 1.002e-1 | <b>0.549</b>   | 11.463 | 6.926e-4 | 1.182e-3 |                         |     |       |       |    |    |    |   |   |   |   |  |  |  |  |  |  |  |  |  |  |  |  |
|               | AAL93885.1   ADP-heptose synthase                                 |        |          |          |               |        |          |          |               |        |          |          |                |        |          |          |              |        |          |          |                |        |          |          |                         |     |       |       |    |    |    |   |   |   |   |  |  |  |  |  |  |  |  |  |  |  |  |
| <b>FN1787</b> | <b>-2.139</b>                                                     | 10.221 | 8.616e-4 | 3.704e-4 | -2.366        | 10.179 |          |          | <b>-1.042</b> | 11.114 | 1.322e-3 | 3.521e-3 | 1.097          | 9.179  | 1.653e-2 | 1.635e-2 | -0.226       | 8.040  |          |          | 1.323          | 9.137  |          |          |                         |     |       |       |    |    |    |   |   |   |   |  |  |  |  |  |  |  |  |  |  |  |  |
|               | AAL93886.1   Tetratricopeptide repeat family protein              |        |          |          |               |        |          |          |               |        |          |          |                |        |          |          |              |        |          |          |                |        |          |          |                         |     |       |       |    |    |    |   |   |   |   |  |  |  |  |  |  |  |  |  |  |  |  |
| <b>FN1788</b> | 0.089                                                             | 9.167  | 2.6e-1   | 7.834e-1 | <b>-0.505</b> | 8.757  | 3.007e-3 | 1.126e-2 | 0.133         | 9.007  | 7.27e-2  | 3.924e-1 | 0.044          | 9.299  | 2.706e-1 | 8.895e-1 | -0.594       | 8.846  | 1.461e-1 | 1.792e-1 | 0.638          | 8.890  | 6.02e-3  | 1.903e-2 |                         |     |       |       |    |    |    |   |   |   |   |  |  |  |  |  |  |  |  |  |  |  |  |
|               | AAL93887.1   2C-methyl-D-erythritol 2,4-cyclodiphosphate synthase |        |          |          |               |        |          |          |               |        |          |          |                |        |          |          |              |        |          |          |                |        |          |          |                         |     |       |       |    |    |    |   |   |   |   |  |  |  |  |  |  |  |  |  |  |  |  |
| <b>FN1790</b> | 3.150                                                             | 7.103  |          |          | 3.530         | 7.668  |          |          | 1.328         | 5.077  |          |          | -1.822         | 8.430  | 1.002e-1 | 2.2e-1   | 0.381        | 10.817 | 3.163e-1 | 6.041e-1 | -2.203         | 8.995  | 1.027e-2 | 3.619e-2 |                         |     |       |       |    |    |    |   |   |   |   |  |  |  |  |  |  |  |  |  |  |  |  |
|               | AAL93889.1   Cob(I)alamin adenosyltransferase                     |        |          |          |               |        |          |          |               |        |          |          |                |        |          |          |              |        |          |          |                |        |          |          |                         |     |       |       |    |    |    |   |   |   |   |  |  |  |  |  |  |  |  |  |  |  |  |

Show detected proteins only

Show all proteins

Filter by category:

GO: amino acid transport

Proteins found: 1424

Enter (or paste) list of ORFs

Find ORFs

Test

q-Value

p-Value

Cutoff

.005

Dot Plots

Dot Plots

| Signif | Direction | Applies To   |
|--------|-----------|--------------|
| yes    | +         | ratios, bars |
| no     | n/a       | bars         |
| yes    | -         | ratios, bars |
| yes    | +         | p-, q-Values |
| yes    | -         | p-, q-Values |

FnPg vs Fn

FnPgSg vs Fn

FnSg vs FnPg

FnPgSg vs FnSg

FnSg vs Fn

FnPgSg vs FnPg

FnSg vs FnPg

FnPgSg vs FnSg



Fn Summary Table

FnPg vs Fn

FnSg vs Fn

FnPgSg vs Fn

FnPgSg vs FnPg

FnSg vs FnPg

FnPgSg vs FnSg

Fn Coverage

| ORF           | FnPg vs Fn                                                                |        |          |          | FnSg vs Fn |        |          |          | FnPgSg vs Fn |        |          |          | FnPgSg vs FnPg |        |          |          | FnSg vs FnPg |        |          |          | FnPgSg vs FnSg |        |          |          | Log <sub>2</sub> Ratios |     |       |       |    |    |    |   |   |   |
|---------------|---------------------------------------------------------------------------|--------|----------|----------|------------|--------|----------|----------|--------------|--------|----------|----------|----------------|--------|----------|----------|--------------|--------|----------|----------|----------------|--------|----------|----------|-------------------------|-----|-------|-------|----|----|----|---|---|---|
|               | Ratio                                                                     | Sum    | q-Val    | p-Val    | Ratio      | Sum    | q-Val    | p-Val    | Ratio        | Sum    | q-Val    | p-Val    | Ratio          | Sum    | q-Val    | p-Val    | Ratio        | Sum    | q-Val    | p-Val    | Ratio          | Sum    | q-Val    | p-Val    | Ratio                   | Sum | q-Val | p-Val | -6 | -4 | -2 | 0 | 2 | 4 |
| <b>FN1791</b> | AAL93890.1   Mutator MuT protein                                          |        |          |          |            |        |          |          |              |        |          |          |                |        |          |          |              |        |          |          |                |        |          |          |                         |     |       |       |    |    |    |   |   |   |
| <b>FN1792</b> | 0.744                                                                     | 22.973 | 7.001e-2 | 1.427e-1 | -0.244     | 22.170 | 3.243e-2 | 1.745e-1 | 2.062        | 24.088 | 8.106e-9 | 5.46e-11 | 1.318          | 25.036 | 7.919e-3 | 5.222e-3 | -0.988       | 22.914 | 1.031e-1 | 8.992e-2 | 2.306          | 24.232 | 4.189e-5 | 2.723e-5 |                         |     |       |       |    |    |    |   |   |   |
|               | AAL93891.1   Hypothetical protein                                         |        |          |          |            |        |          |          |              |        |          |          |                |        |          |          |              |        |          |          |                |        |          |          |                         |     |       |       |    |    |    |   |   |   |
| <b>FN1793</b> | 0.340                                                                     | 14.830 | 2.264e-1 | 6.524e-1 | 0.619      | 15.293 | 1.327e-4 | 2.272e-4 | -0.653       | 13.634 | 8.342e-5 | 8.319e-5 | -0.993         | 14.177 | 1.286e-1 | 3.223e-1 | 0.279        | 15.633 | 3.318e-1 | 6.484e-1 | -1.272         | 14.641 | 7.563e-5 | 5.977e-5 |                         |     |       |       |    |    |    |   |   |   |
|               | AAL93892.1   Phosphoenolpyruvate-protein phosphotransferase               |        |          |          |            |        |          |          |              |        |          |          |                |        |          |          |              |        |          |          |                |        |          |          |                         |     |       |       |    |    |    |   |   |   |
| <b>FN1794</b> | -2.237                                                                    | 12.907 | 4.652e-4 | 1.373e-4 | -2.139     | 13.189 | 5.94e-5  | 7.745e-5 | -0.325       | 14.614 | 2.967e-2 | 1.418e-1 | 1.911          | 12.582 | 1.253e-2 | 1.062e-2 | 0.097        | 10.952 | 3.806e-1 | 8.022e-1 | 1.814          | 12.863 | 2.338e-3 | 5.629e-3 |                         |     |       |       |    |    |    |   |   |   |
|               | AAL93893.1   Phosphocarrier protein HPr                                   |        |          |          |            |        |          |          |              |        |          |          |                |        |          |          |              |        |          |          |                |        |          |          |                         |     |       |       |    |    |    |   |   |   |
| <b>FN1795</b> | AAL93894.1   Hypothetical protein                                         |        |          |          |            |        |          |          |              |        |          |          |                |        |          |          |              |        |          |          |                |        |          |          |                         |     |       |       |    |    |    |   |   |   |
| <b>FN1796</b> |                                                                           |        |          |          | 0.194      | 5.806  |          |          |              |        |          |          |                |        |          |          |              |        |          |          |                |        |          |          |                         |     |       |       |    |    |    |   |   |   |
|               | AAL93895.1   unknown                                                      |        |          |          |            |        |          |          |              |        |          |          |                |        |          |          |              |        |          |          |                |        |          |          |                         |     |       |       |    |    |    |   |   |   |
| <b>FN1797</b> | -0.965                                                                    | 12.188 | 1.807e-2 | 2.372e-2 | -0.397     | 12.940 | 5.661e-3 | 2.387e-2 | -1.666       | 11.284 | 1.595e-5 | 6.328e-6 | -0.700         | 10.522 | 9.57e-2  | 2.044e-1 | 0.568        | 11.975 | 1.291e-1 | 1.38e-1  | -1.268         | 11.275 | 1.183e-3 | 2.414e-3 |                         |     |       |       |    |    |    |   |   |   |
|               | AAL93896.1   Spermidine/putrescine transport ATP-binding protein potA     |        |          |          |            |        |          |          |              |        |          |          |                |        |          |          |              |        |          |          |                |        |          |          |                         |     |       |       |    |    |    |   |   |   |
| <b>FN1798</b> | -0.529                                                                    | 7.173  |          |          | -1.055     | 6.832  |          |          | -1.273       | 6.225  |          |          | -0.744         | 5.900  |          |          | -0.526       | 6.303  |          |          | -0.219         | 5.558  | 9.413e-3 | 3.258e-2 |                         |     |       |       |    |    |    |   |   |   |
|               | AAL93897.1   Spermidine/putrescine transport system permease protein potB |        |          |          |            |        |          |          |              |        |          |          |                |        |          |          |              |        |          |          |                |        |          |          |                         |     |       |       |    |    |    |   |   |   |
| <b>FN1800</b> | -1.164                                                                    | 14.275 | 1.624e-3 | 9.55e-4  | -0.041     | 15.581 | 1.268e-1 | 7.719e-1 | -0.311       | 14.924 | 9.349e-3 | 3.815e-2 | 0.853          | 13.964 | 4.957e-3 | 2.494e-3 | 1.122        | 14.418 | 2.047e-2 | 4.821e-3 | -0.269         | 15.271 | 4.052e-2 | 1.758e-1 |                         |     |       |       |    |    |    |   |   |   |
|               | AAL93899.1   Peptidyl-prolyl cis-trans isomerase                          |        |          |          |            |        |          |          |              |        |          |          |                |        |          |          |              |        |          |          |                |        |          |          |                         |     |       |       |    |    |    |   |   |   |
| <b>FN1801</b> | 1.297                                                                     | 8.419  |          |          | 1.049      | 8.356  |          |          | -0.652       | 6.267  |          |          | -1.949         | 7.767  |          |          | -0.248       | 9.652  |          |          | -1.701         | 7.704  |          |          |                         |     |       |       |    |    |    |   |   |   |
|               | AAL93900.1   Sodium/glutamate symport carrier protein                     |        |          |          |            |        |          |          |              |        |          |          |                |        |          |          |              |        |          |          |                |        |          |          |                         |     |       |       |    |    |    |   |   |   |
| <b>FN1803</b> |                                                                           |        |          |          | 0.128      | 6.488  |          |          | 1.473        | 7.445  |          |          |                |        |          |          | 1.345        | 7.962  |          |          |                |        |          |          |                         |     |       |       |    |    |    |   |   |   |
|               | AAL93902.1   Transcriptional regulator, TetR family                       |        |          |          |            |        |          |          |              |        |          |          |                |        |          |          |              |        |          |          |                |        |          |          |                         |     |       |       |    |    |    |   |   |   |
| <b>FN1804</b> | 0.733                                                                     | 8.186  |          |          | 1.168      | 8.806  | 7.785e-3 | 3.476e-2 |              |        |          |          | 0.435          | 9.539  |          |          |              |        |          |          |                |        |          |          |                         |     |       |       |    |    |    |   |   |   |
|               | AAL93903.1   Aminoacyl-histidine dipeptidase                              |        |          |          |            |        |          |          |              |        |          |          |                |        |          |          |              |        |          |          |                |        |          |          |                         |     |       |       |    |    |    |   |   |   |
| <b>FN1807</b> | -0.405                                                                    | 17.120 | 4.755e-4 | 1.426e-4 | -1.080     | 16.630 | 3.196e-5 | 3.133e-5 | 0.029        | 17.351 | 5.788e-2 | 3.049e-1 | 0.435          | 17.149 | 1.233e-3 | 3.388e-4 | -0.674       | 16.225 | 3.372e-3 | 3.296e-4 | 1.109          | 16.659 | 1.354e-4 | 1.286e-4 |                         |     |       |       |    |    |    |   |   |   |
|               | AAL93906.1   Hypothetical protein                                         |        |          |          |            |        |          |          |              |        |          |          |                |        |          |          |              |        |          |          |                |        |          |          |                         |     |       |       |    |    |    |   |   |   |
| <b>FN1808</b> | -3.354                                                                    | 10.524 |          |          | -4.066     | 9.997  |          |          | -1.913       | 11.762 | 3.078e-4 | 5.231e-4 | 1.442          | 8.612  |          |          | -0.712       | 6.642  |          |          | 2.154          | 8.084  |          |          |                         |     |       |       |    |    |    |   |   |   |
|               | AAL93907.1   Hypothetical protein                                         |        |          |          |            |        |          |          |              |        |          |          |                |        |          |          |              |        |          |          |                |        |          |          |                         |     |       |       |    |    |    |   |   |   |
| <b>FN1809</b> | 0.046                                                                     | 8.944  | 2.993e-1 | 9.525e-1 | -0.448     | 8.634  | 4.384e-2 | 2.418e-1 | 0.257        | 8.951  | 5.993e-2 | 3.168e-1 | 0.210          | 9.201  | 2.412e-1 | 7.621e-1 | -0.495       | 8.680  | 3.109e-1 | 5.889e-1 | 0.705          | 8.891  | 8.761e-3 | 2.993e-2 |                         |     |       |       |    |    |    |   |   |   |
|               | AAL93908.1   Iron/zinc/copper-binding protein                             |        |          |          |            |        |          |          |              |        |          |          |                |        |          |          |              |        |          |          |                |        |          |          |                         |     |       |       |    |    |    |   |   |   |
| <b>FN1811</b> | -1.950                                                                    | 10.824 | 6.988e-4 | 2.593e-4 | -2.238     | 10.721 | 4.003e-5 | 4.383e-5 | -1.648       | 10.922 | 3.729e-5 | 2.584e-5 | 0.301          | 9.176  | 1.695e-1 | 4.725e-1 | -0.288       | 8.771  | 2.86e-1  | 5.229e-1 | 0.589          | 9.072  | 2.171e-2 | 8.683e-2 |                         |     |       |       |    |    |    |   |   |   |
|               | AAL93910.1   Manganese transport system ATP-binding protein mntA          |        |          |          |            |        |          |          |              |        |          |          |                |        |          |          |              |        |          |          |                |        |          |          |                         |     |       |       |    |    |    |   |   |   |
| <b>FN1812</b> | -0.764                                                                    | 14.623 | 7.852e-2 | 1.657e-1 | -2.463     | 13.109 | 6.056e-6 | 2.629e-6 | -0.884       | 14.299 | 1.088e-4 | 1.234e-4 | -0.120         | 13.739 | 2.616e-1 | 8.492e-1 | -1.699       | 12.344 | 1.422e-1 | 1.687e-1 | 1.579          | 12.225 | 6.106e-4 | 9.948e-4 |                         |     |       |       |    |    |    |   |   |   |
|               | AAL93911.1   Manganese-binding protein                                    |        |          |          |            |        |          |          |              |        |          |          |                |        |          |          |              |        |          |          |                |        |          |          |                         |     |       |       |    |    |    |   |   |   |

Show detected proteins only  
 Show all proteins  
 Filter by category:

Proteins found: 1424

Enter (or paste) list of ORFs

Find ORFs

Test Cutoff

q-Value .005

p-Value

Dot Plots

| Signif | Direction | Applies To   |
|--------|-----------|--------------|
| yes    | +         | ratios, bars |
| no     | n/a       | bars         |
| yes    | -         | ratios, bars |
| yes    | +         | p-, q-Values |
| yes    | -         | p-, q-Values |

FnPg vs Fn — █ — FnSg vs Fn  
 FnPgSg vs Fn — █ — FnPgSg vs FnPg  
 FnSg vs FnPg — █ — FnPgSg vs FnSg



Fn Summary Table   FnPg vs Fn   FnSg vs Fn   FnPgSg vs Fn   FnPgSg vs FnPg   FnSg vs FnPg   FnPgSg vs FnSg   Fn Coverage

| ORF                                                    | FnPg vs Fn |        |          |          | FnSg vs Fn |        |          |          | FnPgSg vs Fn |        |          |          | FnPgSg vs FnPg |        |          |          | FnSg vs FnPg |        |          |          | FnPgSg vs FnSg |        |          |          | Log <sub>2</sub> Ratios |     |       |       |    |    |    |   |   |   |   |  |  |  |
|--------------------------------------------------------|------------|--------|----------|----------|------------|--------|----------|----------|--------------|--------|----------|----------|----------------|--------|----------|----------|--------------|--------|----------|----------|----------------|--------|----------|----------|-------------------------|-----|-------|-------|----|----|----|---|---|---|---|--|--|--|
|                                                        | Ratio      | Sum    | q-Val    | p-Val    | Ratio      | Sum    | q-Val    | p-Val    | Ratio        | Sum    | q-Val    | p-Val    | Ratio          | Sum    | q-Val    | p-Val    | Ratio        | Sum    | q-Val    | p-Val    | Ratio          | Sum    | q-Val    | p-Val    | Ratio                   | Sum | q-Val | p-Val | -6 | -4 | -2 | 0 | 2 | 4 | 6 |  |  |  |
| <b>FN1813</b>                                          | -2.125     | 8.768  |          |          | -2.467     | 8.610  | 4.626e-5 | 5.489e-5 | -1.315       | 9.374  | 1.684e-4 | 2.261e-4 | 0.809          | 7.453  |          |          | -0.343       | 6.485  |          |          | 1.152          | 7.295  | 7.008e-6 | 1.596e-6 |                         |     |       |       |    |    |    |   |   |   |   |  |  |  |
| AAL93912.1   Manganese-binding protein                 |            |        |          |          |            |        |          |          |              |        |          |          |                |        |          |          |              |        |          |          |                |        |          |          |                         |     |       |       |    |    |    |   |   |   |   |  |  |  |
| <b>FN1814</b>                                          |            |        |          |          | -1.854     | 8.615  |          |          | -1.431       | 8.650  | 2.654e-3 | 8.491e-3 |                |        |          |          |              |        |          |          | 0.423          | 7.184  |          |          |                         |     |       |       |    |    |    |   |   |   |   |  |  |  |
| AAL93913.1   Hypothetical protein                      |            |        |          |          |            |        |          |          |              |        |          |          |                |        |          |          |              |        |          |          |                |        |          |          |                         |     |       |       |    |    |    |   |   |   |   |  |  |  |
| <b>FN1816</b>                                          | 0.093      | 6.397  | 2.275e-1 | 6.566e-1 | 1.563      | 8.052  |          |          | -0.306       | 5.795  | 3.338e-2 | 1.631e-1 | -0.398         | 6.092  | 4.697e-2 | 7.241e-2 | 1.470        | 8.145  |          |          | -1.868         | 7.746  |          |          |                         |     |       |       |    |    |    |   |   |   |   |  |  |  |
| AAL93915.1   unknown                                   |            |        |          |          |            |        |          |          |              |        |          |          |                |        |          |          |              |        |          |          |                |        |          |          |                         |     |       |       |    |    |    |   |   |   |   |  |  |  |
| <b>FN1817</b>                                          | -0.378     | 5.575  |          |          | -0.484     | 5.654  |          |          | 0.425        | 6.174  |          |          | 0.803          | 5.999  | 3.244e-2 | 4.268e-2 | -0.105       | 5.275  |          |          | 0.908          | 6.078  |          |          |                         |     |       |       |    |    |    |   |   |   |   |  |  |  |
| AAL93916.1   Hemolysin                                 |            |        |          |          |            |        |          |          |              |        |          |          |                |        |          |          |              |        |          |          |                |        |          |          |                         |     |       |       |    |    |    |   |   |   |   |  |  |  |
| <b>FN1819</b>                                          |            |        |          |          |            |        |          |          |              |        |          |          |                |        |          |          |              |        |          |          |                |        |          |          |                         |     |       |       |    |    |    |   |   |   |   |  |  |  |
| AAL93918.1   Export ABC transporter                    |            |        |          |          |            |        |          |          |              |        |          |          |                |        |          |          |              |        |          |          |                |        |          |          |                         |     |       |       |    |    |    |   |   |   |   |  |  |  |
| <b>FN1820</b>                                          |            |        |          |          |            |        |          |          |              |        |          |          |                |        |          |          |              |        |          |          |                |        |          |          |                         |     |       |       |    |    |    |   |   |   |   |  |  |  |
| AAL93919.1   Export ABC transporter                    |            |        |          |          |            |        |          |          |              |        |          |          |                |        |          |          |              |        |          |          |                |        |          |          |                         |     |       |       |    |    |    |   |   |   |   |  |  |  |
| <b>FN1822</b>                                          |            |        |          |          |            |        |          |          |              |        |          |          |                |        |          |          |              |        |          |          |                |        |          |          |                         |     |       |       |    |    |    |   |   |   |   |  |  |  |
| AAL93921.1   Flavodoxin                                |            |        |          |          |            |        |          |          |              |        |          |          |                |        |          |          |              |        |          |          |                |        |          |          |                         |     |       |       |    |    |    |   |   |   |   |  |  |  |
| <b>FN1825</b>                                          |            |        |          |          |            |        |          |          |              |        |          |          |                |        |          |          |              |        |          |          |                |        |          |          |                         |     |       |       |    |    |    |   |   |   |   |  |  |  |
| AAL93924.1   Hypothetical protein                      |            |        |          |          |            |        |          |          |              |        |          |          |                |        |          |          |              |        |          |          |                |        |          |          |                         |     |       |       |    |    |    |   |   |   |   |  |  |  |
| <b>FN1826</b>                                          | -1.242     | 11.001 | 8.325e-4 | 3.482e-4 | -1.115     | 11.313 | 5.451e-4 | 1.375e-3 | -0.410       | 11.630 | 5.195e-3 | 1.912e-2 | 0.832          | 10.592 | 3.215e-3 | 1.363e-3 | 0.127        | 10.071 | 1.876e-1 | 2.815e-1 | 0.705          | 10.903 | 1.813e-4 | 1.911e-4 |                         |     |       |       |    |    |    |   |   |   |   |  |  |  |
| AAL93925.1   Protease                                  |            |        |          |          |            |        |          |          |              |        |          |          |                |        |          |          |              |        |          |          |                |        |          |          |                         |     |       |       |    |    |    |   |   |   |   |  |  |  |
| <b>FN1827</b>                                          | -0.457     | 11.493 | 5.739e-2 | 1.087e-1 | 0.562      | 12.697 | 3.596e-3 | 1.412e-2 | -0.895       | 10.851 | 6.268e-3 | 2.389e-2 | -0.438         | 10.598 | 7.193e-2 | 1.341e-1 | 1.020        | 12.239 | 6.817e-3 | 9.539e-4 | -1.457         | 11.802 | 6.894e-4 | 1.175e-3 |                         |     |       |       |    |    |    |   |   |   |   |  |  |  |
| AAL93926.1   Replicative DNA helicase                  |            |        |          |          |            |        |          |          |              |        |          |          |                |        |          |          |              |        |          |          |                |        |          |          |                         |     |       |       |    |    |    |   |   |   |   |  |  |  |
| <b>FN1828</b>                                          | -0.343     | 13.069 | 1.914e-1 | 5.278e-1 | -1.611     | 11.985 | 1.875e-4 | 3.539e-4 | -1.285       | 11.923 | 1.042e-4 | 1.164e-4 | -0.942         | 11.784 | 1.199e-1 | 2.902e-1 | -1.269       | 11.642 | 1.606e-1 | 2.157e-1 | 0.327          | 10.700 | 1.534e-2 | 5.792e-2 |                         |     |       |       |    |    |    |   |   |   |   |  |  |  |
| AAL93927.1   LSU ribosomal protein L9P                 |            |        |          |          |            |        |          |          |              |        |          |          |                |        |          |          |              |        |          |          |                |        |          |          |                         |     |       |       |    |    |    |   |   |   |   |  |  |  |
| <b>FN1830</b>                                          | 0.319      | 10.276 | 1.633e-1 | 4.251e-1 | 0.831      | 10.973 | 7.067e-3 | 3.105e-2 | -0.965       | 8.788  | 1.069e-4 | 1.205e-4 | -1.284         | 9.311  | 4.641e-2 | 7.113e-2 | 0.512        | 11.292 | 1.423e-1 | 1.689e-1 | -1.796         | 10.007 | 3.083e-3 | 7.944e-3 |                         |     |       |       |    |    |    |   |   |   |   |  |  |  |
| AAL93929.1   DNA polymerase III subunits gamma and tau |            |        |          |          |            |        |          |          |              |        |          |          |                |        |          |          |              |        |          |          |                |        |          |          |                         |     |       |       |    |    |    |   |   |   |   |  |  |  |
| <b>FN1831</b>                                          | 0.505      | 12.687 | 8.971e-3 | 9.957e-3 | 0.765      | 13.132 | 3.158e-6 | 9.818e-7 | -0.796       | 11.183 | 3.185e-3 | 1.06e-2  | -1.301         | 11.892 | 9.341e-4 | 2.159e-4 | 0.260        | 13.637 | 5.632e-2 | 2.828e-2 | -1.561         | 12.336 | 2.961e-4 | 3.795e-4 |                         |     |       |       |    |    |    |   |   |   |   |  |  |  |
| AAL93930.1   Nitrogen assimilation regulatory protein  |            |        |          |          |            |        |          |          |              |        |          |          |                |        |          |          |              |        |          |          |                |        |          |          |                         |     |       |       |    |    |    |   |   |   |   |  |  |  |
| <b>FN1832</b>                                          |            |        |          |          |            |        |          |          |              |        |          |          |                |        |          |          |              |        |          |          | -0.771         | 5.159  |          |          |                         |     |       |       |    |    |    |   |   |   |   |  |  |  |
| AAL93931.1   TonB protein                              |            |        |          |          |            |        |          |          |              |        |          |          |                |        |          |          |              |        |          |          |                |        |          |          |                         |     |       |       |    |    |    |   |   |   |   |  |  |  |
| <b>FN1833</b>                                          |            |        |          |          |            |        |          |          |              |        |          |          | 0.448          | 8.623  |          |          |              |        |          |          |                |        |          |          |                         |     |       |       |    |    |    |   |   |   |   |  |  |  |
| AAL93932.1   Biopolymer transport exbD protein         |            |        |          |          |            |        |          |          |              |        |          |          |                |        |          |          |              |        |          |          |                |        |          |          |                         |     |       |       |    |    |    |   |   |   |   |  |  |  |
| <b>FN1834</b>                                          | -1.228     | 10.793 | 3.924e-4 | 1.042e-4 | -1.470     | 10.736 | 1.335e-5 | 9.22e-6  | -0.833       | 10.984 | 2.285e-4 | 3.536e-4 | 0.395          | 9.960  | 3.835e-2 | 5.428e-2 | -0.241       | 9.508  | 1.259e-1 | 1.314e-1 | 0.636          | 9.903  | 4.62e-3  | 1.356e-2 |                         |     |       |       |    |    |    |   |   |   |   |  |  |  |
| AAL93933.1   Biopolymer transport exbB protein         |            |        |          |          |            |        |          |          |              |        |          |          |                |        |          |          |              |        |          |          |                |        |          |          |                         |     |       |       |    |    |    |   |   |   |   |  |  |  |
| <b>FN1836</b>                                          | -1.370     | 12.374 | 6.756e-4 | 2.451e-4 | -1.081     | 12.848 | 2.971e-5 | 2.831e-5 | -0.525       | 13.016 | 6.48e-5  | 5.838e-5 | 0.846          | 11.849 | 6.353e-3 | 3.598e-3 | 0.289        | 11.477 | 1.511e-1 | 1.931e-1 | 0.556          | 12.323 | 9.94e-4  | 1.922e-3 |                         |     |       |       |    |    |    |   |   |   |   |  |  |  |
| AAL93935.1   Tetratricopeptide repeat family protein   |            |        |          |          |            |        |          |          |              |        |          |          |                |        |          |          |              |        |          |          |                |        |          |          |                         |     |       |       |    |    |    |   |   |   |   |  |  |  |

Show detected proteins only  
 Show all proteins  
 Filter by category:

Proteins found: 1424

Test Cutoff

| Signif | Direction | Applies To   |
|--------|-----------|--------------|
| yes    | +         | ratios, bars |
| no     | n/a       | bars         |
| yes    | -         | ratios, bars |
| yes    | +         | p-, q-Values |
| yes    | -         | p-, q-Values |

FnPg vs Fn — █ — FnSg vs Fn

FnPgSg vs Fn — █ — FnPgSg vs FnPg

FnSg vs FnPg — █ — FnPgSg vs FnSg





Fn Summary Table   FnPg vs Fn   FnSg vs Fn   FnPgSg vs Fn   FnPgSg vs FnPg   FnSg vs FnPg   FnPgSg vs FnSg   Fn Coverage

| ORF           | FnPg vs Fn                                                                  |        |          |          | FnSg vs Fn |        |          |          | FnPgSg vs Fn |        |          |          | FnPgSg vs FnPg |        |          |          | FnSg vs FnPg |        |          |          | FnPgSg vs FnSg |        |          |          | Log <sub>2</sub> Ratios |     |       |       |    |    |    |   |   |   |   |  |
|---------------|-----------------------------------------------------------------------------|--------|----------|----------|------------|--------|----------|----------|--------------|--------|----------|----------|----------------|--------|----------|----------|--------------|--------|----------|----------|----------------|--------|----------|----------|-------------------------|-----|-------|-------|----|----|----|---|---|---|---|--|
|               | Ratio                                                                       | Sum    | q-Val    | p-Val    | Ratio      | Sum    | q-Val    | p-Val    | Ratio        | Sum    | q-Val    | p-Val    | Ratio          | Sum    | q-Val    | p-Val    | Ratio        | Sum    | q-Val    | p-Val    | Ratio          | Sum    | q-Val    | p-Val    | Ratio                   | Sum | q-Val | p-Val | -6 | -4 | -2 | 0 | 2 | 4 | 6 |  |
| <b>FN1875</b> | 0.043                                                                       | 14.147 | 2.717e-1 | 8.319e-1 | 0.587      | 14.875 | 4.876e-3 | 2.011e-2 | -0.055       | 13.845 | 1.35e-1  | 7.898e-1 | -0.098         | 14.092 | 1.804e-1 | 5.147e-1 | 0.544        | 14.919 | 2.095e-2 | 4.997e-3 | -0.642         | 14.821 | 1.012e-3 | 1.968e-3 |                         |     |       |       |    |    |    |   |   |   |   |  |
|               | AAL93974.1  Peptidyl-prolyl cis-trans isomerase                             |        |          |          |            |        |          |          |              |        |          |          |                |        |          |          |              |        |          |          |                |        |          |          |                         |     |       |       |    |    |    |   |   |   |   |  |
| <b>FN1877</b> |                                                                             |        |          |          |            |        |          |          |              |        |          |          | 0.324          | 5.494  |          |          |              |        |          |          |                |        |          |          |                         |     |       |       |    |    |    |   |   |   |   |  |
|               | AAL93976.1  Guanine-hypoxanthine permease                                   |        |          |          |            |        |          |          |              |        |          |          |                |        |          |          |              |        |          |          |                |        |          |          |                         |     |       |       |    |    |    |   |   |   |   |  |
| <b>FN1878</b> |                                                                             |        |          |          |            |        |          |          | -1.230       | 5.874  |          |          |                |        |          |          |              |        |          |          |                |        |          |          |                         |     |       |       |    |    |    |   |   |   |   |  |
|               | AAL93977.1  unknown                                                         |        |          |          |            |        |          |          |              |        |          |          |                |        |          |          |              |        |          |          |                |        |          |          |                         |     |       |       |    |    |    |   |   |   |   |  |
| <b>FN1879</b> |                                                                             |        |          |          |            |        |          |          | -0.567       | 10.101 |          |          |                |        |          |          |              |        |          |          |                |        |          |          |                         |     |       |       |    |    |    |   |   |   |   |  |
|               | AAL93978.1  SSU ribosomal protein S20P                                      |        |          |          |            |        |          |          |              |        |          |          |                |        |          |          |              |        |          |          |                |        |          |          |                         |     |       |       |    |    |    |   |   |   |   |  |
| <b>FN1880</b> | 1.807                                                                       | 12.789 | 2.521e-6 | 1.122e-7 | 1.246      | 12.413 | 1.623e-3 | 5.324e-3 | 0.261        | 11.039 | 6.04e-2  | 3.195e-1 | -1.546         | 13.050 | 1.109e-3 | 2.871e-4 | -0.560       | 14.219 | 3.269e-2 | 1.06e-2  | -0.985         | 12.674 | 2.301e-3 | 5.514e-3 |                         |     |       |       |    |    |    |   |   |   |   |  |
|               | AAL93979.1  Oxygen-insensitive NAD(P)H nitroreductase                       |        |          |          |            |        |          |          |              |        |          |          |                |        |          |          |              |        |          |          |                |        |          |          |                         |     |       |       |    |    |    |   |   |   |   |  |
| <b>FN1881</b> |                                                                             |        |          |          |            |        |          |          |              |        |          |          | -0.635         | 6.009  |          |          | 0.309        | 7.137  |          |          | -0.944         | 6.502  |          |          |                         |     |       |       |    |    |    |   |   |   |   |  |
|               | AAL93980.1  Esterase                                                        |        |          |          |            |        |          |          |              |        |          |          |                |        |          |          |              |        |          |          |                |        |          |          |                         |     |       |       |    |    |    |   |   |   |   |  |
| <b>FN1884</b> | -0.444                                                                      | 11.353 |          |          |            |        |          |          | 0.857        | 12.449 | 9.932e-3 | 4.091e-2 | 1.301          | 12.209 |          |          |              |        |          |          |                |        |          |          |                         |     |       |       |    |    |    |   |   |   |   |  |
|               | AAL93983.1  unknown                                                         |        |          |          |            |        |          |          |              |        |          |          |                |        |          |          |              |        |          |          |                |        |          |          |                         |     |       |       |    |    |    |   |   |   |   |  |
| <b>FN1890</b> | 2.010                                                                       | 7.817  |          |          |            |        |          |          | 1.438        | 7.041  | 7.304e-4 | 1.61e-3  | -0.572         | 9.255  |          |          |              |        |          |          |                |        |          |          |                         |     |       |       |    |    |    |   |   |   |   |  |
|               | AAL93989.1  Hypothetical protein                                            |        |          |          |            |        |          |          |              |        |          |          |                |        |          |          |              |        |          |          |                |        |          |          |                         |     |       |       |    |    |    |   |   |   |   |  |
| <b>FN1891</b> | 0.939                                                                       | 8.361  | 1.275e-1 | 3.085e-1 | 1.317      | 8.923  | 3.924e-4 | 9.01e-4  | 0.151        | 7.369  | 1.013e-1 | 5.703e-1 | -0.788         | 8.512  | 1.377e-1 | 3.577e-1 | 0.377        | 9.862  | 2.765e-2 | 4.99e-1  | -1.166         | 9.074  | 2.615e-4 | 3.219e-4 |                         |     |       |       |    |    |    |   |   |   |   |  |
|               | AAL93990.1  Glycerophosphoryl diester phosphodiesterase                     |        |          |          |            |        |          |          |              |        |          |          |                |        |          |          |              |        |          |          |                |        |          |          |                         |     |       |       |    |    |    |   |   |   |   |  |
| <b>FN1893</b> | -0.583                                                                      | 18.694 | 1.202e-4 | 1.828e-5 | -0.896     | 18.566 | 4.388e-6 | 1.551e-6 | -1.052       | 18.021 | 3.598e-4 | 6.499e-4 | -0.469         | 17.642 | 1.688e-2 | 1.682e-2 | -0.312       | 17.983 | 1.168e-2 | 2.149e-3 | -0.156         | 17.514 | 5.534e-2 | 2.499e-1 |                         |     |       |       |    |    |    |   |   |   |   |  |
|               | AAL93991.1  Fusobacterium outer membrane protein family                     |        |          |          |            |        |          |          |              |        |          |          |                |        |          |          |              |        |          |          |                |        |          |          |                         |     |       |       |    |    |    |   |   |   |   |  |
| <b>FN1895</b> |                                                                             |        |          |          |            |        |          |          |              |        |          |          |                |        |          |          |              |        |          |          |                |        |          |          |                         |     |       |       |    |    |    |   |   |   |   |  |
|               | AAL93994.1  Hypothetical protein                                            |        |          |          |            |        |          |          |              |        |          |          |                |        |          |          |              |        |          |          |                |        |          |          |                         |     |       |       |    |    |    |   |   |   |   |  |
| <b>FN1898</b> | -1.157                                                                      | 10.576 | 1.509e-2 | 1.872e-2 | -0.046     | 11.871 | 1.335e-1 | 8.185e-1 | -0.600       | 10.928 | 5.152e-3 | 1.893e-2 | 0.557          | 9.976  | 1.009e-1 | 2.226e-1 | 1.111        | 10.714 | 5.218e-2 | 2.468e-2 | -0.554         | 11.271 | 1.264e-2 | 4.628e-2 |                         |     |       |       |    |    |    |   |   |   |   |  |
|               | AAL93997.1  Sugar transport ATP-binding protein                             |        |          |          |            |        |          |          |              |        |          |          |                |        |          |          |              |        |          |          |                |        |          |          |                         |     |       |       |    |    |    |   |   |   |   |  |
| <b>FN1899</b> | 0.060                                                                       | 15.420 | 2.563e-1 | 7.682e-1 | 0.424      | 15.968 | 6.625e-4 | 1.77e-3  | -0.635       | 14.521 | 4.938e-4 | 9.835e-4 | -0.695         | 14.785 | 3.412e-2 | 4.611e-2 | 0.364        | 16.028 | 1.089e-1 | 9.967e-2 | -1.058         | 15.333 | 1.374e-4 | 1.312e-4 |                         |     |       |       |    |    |    |   |   |   |   |  |
|               | AAL93998.1  Hypothetical lipoprotein                                        |        |          |          |            |        |          |          |              |        |          |          |                |        |          |          |              |        |          |          |                |        |          |          |                         |     |       |       |    |    |    |   |   |   |   |  |
| <b>FN1901</b> |                                                                             |        |          |          |            |        |          |          |              |        |          |          |                |        |          |          |              |        |          |          |                |        |          |          |                         |     |       |       |    |    |    |   |   |   |   |  |
|               | AAL94000.1  Transcription regulator, CRP family                             |        |          |          |            |        |          |          |              |        |          |          |                |        |          |          |              |        |          |          |                |        |          |          |                         |     |       |       |    |    |    |   |   |   |   |  |
| <b>FN1902</b> | -0.028                                                                      | 10.100 | 2.452e-1 | 7.242e-1 | -0.543     | 9.769  | 8.229e-3 | 3.709e-2 | -0.214       | 9.710  | 3.108e-2 | 1.498e-1 | -0.186         | 9.886  | 1.019e-1 | 2.263e-1 | -0.516       | 9.741  | 6.493e-2 | 3.603e-2 | 0.329          | 9.555  | 4.047e-2 | 1.755e-1 |                         |     |       |       |    |    |    |   |   |   |   |  |
|               | AAL94001.1  Deoxycytidylate deaminase                                       |        |          |          |            |        |          |          |              |        |          |          |                |        |          |          |              |        |          |          |                |        |          |          |                         |     |       |       |    |    |    |   |   |   |   |  |
| <b>FN1903</b> | -2.264                                                                      | 9.805  | 3.089e-3 | 2.337e-3 |            |        |          |          | 1.093        | 12.958 | 4.744e-5 | 3.787e-5 | 3.357          | 10.898 | 1.618e-4 | 1.943e-5 |              |        |          |          |                |        |          |          |                         |     |       |       |    |    |    |   |   |   |   |  |
|               | AAL94002.1  Coenzyme A disulfide reductase/ disulfide bond regulator domain |        |          |          |            |        |          |          |              |        |          |          |                |        |          |          |              |        |          |          |                |        |          |          |                         |     |       |       |    |    |    |   |   |   |   |  |
| <b>FN1905</b> |                                                                             |        |          |          | -0.069     | 4.069  |          |          | -0.290       | 3.460  |          |          |                |        |          |          |              |        |          |          | -0.221         | 3.779  |          |          |                         |     |       |       |    |    |    |   |   |   |   |  |
|               | AAL94004.1  outer membrane protein                                          |        |          |          |            |        |          |          |              |        |          |          |                |        |          |          |              |        |          |          |                |        |          |          |                         |     |       |       |    |    |    |   |   |   |   |  |

Show detected proteins only  
 Show all proteins  
 Filter by category:

Proteins found: 1424

Enter (or paste) list of ORFs

Find ORFs

Test Cutoff

q-Value .005

p-Value

Dot Plots

Dot Plots

| Signif | Direction | Applies To   |
|--------|-----------|--------------|
| yes    | +         | ratios, bars |
| no     | n/a       | bars         |
| yes    | -         | ratios, bars |
| yes    | +         | p-, q-Values |
| yes    | -         | p-, q-Values |

FnPg vs Fn — █ — FnSg vs Fn

FnPgSg vs Fn — █ — FnPgSg vs FnPg

FnSg vs FnPg — █ — FnPgSg vs FnSg

Fn Summary Table FnPg vs Fn FnSg vs Fn FnPgSg vs Fn FnPgSg vs FnPg FnSg vs FnPg FnPgSg vs FnSg Fn Coverage

| ORF                                                                        | FnPg vs Fn    |        |          |          | FnSg vs Fn    |        |          |          | FnPgSg vs Fn  |        |          |          | FnPgSg vs FnPg |        |          |          | FnSg vs FnPg  |        |          |          | FnPgSg vs FnSg |        |          |          | Log <sub>2</sub> Ratios |     |       |       |    |    |    |   |   |   |   |  |
|----------------------------------------------------------------------------|---------------|--------|----------|----------|---------------|--------|----------|----------|---------------|--------|----------|----------|----------------|--------|----------|----------|---------------|--------|----------|----------|----------------|--------|----------|----------|-------------------------|-----|-------|-------|----|----|----|---|---|---|---|--|
|                                                                            | Ratio         | Sum    | q-Val    | p-Val    | Ratio         | Sum    | q-Val    | p-Val    | Ratio         | Sum    | q-Val    | p-Val    | Ratio          | Sum    | q-Val    | p-Val    | Ratio         | Sum    | q-Val    | p-Val    | Ratio          | Sum    | q-Val    | p-Val    | Ratio                   | Sum | q-Val | p-Val | -6 | -4 | -2 | 0 | 2 | 4 | 6 |  |
| <b>FN1906</b>                                                              | 0.592         | 17.159 | 8.944e-2 | 1.965e-1 | <b>0.904</b>  | 17.655 | 3.077e-3 | 1.158e-2 | -0.001        | 16.361 | 1.635e-1 | 9.896e-1 | -0.593         | 17.157 | 9.311e-2 | 1.958e-1 | 0.312         | 18.247 | 2.136e-1 | 3.442e-1 | <b>-0.905</b>  | 17.654 | 2.89e-3  | 7.328e-3 |                         |     |       |       |    |    |    |   |   |   |   |  |
| AAL94005.1   Cytosol aminopeptidase                                        |               |        |          |          |               |        |          |          |               |        |          |          |                |        |          |          |               |        |          |          |                |        |          |          |                         |     |       |       |    |    |    |   |   |   |   |  |
| <b>FN1908</b>                                                              | 0.384         | 16.395 | 2.985e-2 | 4.49e-2  | <b>0.545</b>  | 16.741 | 6.616e-4 | 1.767e-3 | -0.372        | 15.435 | 6.722e-3 | 2.592e-2 | -0.756         | 16.023 | 1.28e-2  | 1.097e-2 | 0.161         | 17.125 | 1.713e-1 | 2.414e-1 | <b>-0.917</b>  | 16.369 | 6.053e-4 | 9.818e-4 |                         |     |       |       |    |    |    |   |   |   |   |  |
| AAL94007.1   Glycerophosphoryl diester phosphodiesterase                   |               |        |          |          |               |        |          |          |               |        |          |          |                |        |          |          |               |        |          |          |                |        |          |          |                         |     |       |       |    |    |    |   |   |   |   |  |
| <b>FN1909</b>                                                              | <b>-0.951</b> | 13.699 | 1.873e-3 | 1.17e-3  | <b>-1.182</b> | 13.653 | 2.194e-5 | 1.868e-5 | <b>-0.228</b> | 14.218 | 5.994e-4 | 1.256e-3 | 0.723          | 13.471 | 8.19e-3  | 5.559e-3 | -0.231        | 12.702 | 1.614e-1 | 2.176e-1 | <b>0.954</b>   | 13.425 | 3.667e-4 | 4.989e-4 |                         |     |       |       |    |    |    |   |   |   |   |  |
| AAL94008.1   UDP-3-O-[3-hydroxymyristoyl] glucosamine N-acyltransferase    |               |        |          |          |               |        |          |          |               |        |          |          |                |        |          |          |               |        |          |          |                |        |          |          |                         |     |       |       |    |    |    |   |   |   |   |  |
| <b>FN1910</b>                                                              | <b>-1.075</b> | 15.909 | 2.784e-3 | 2.019e-3 | <b>-1.868</b> | 15.301 | 2.212e-4 | 4.327e-4 | <b>0.532</b>  | 17.313 | 1.498e-3 | 4.204e-3 | <b>1.607</b>   | 16.441 | 1.193e-4 | 1.237e-5 | -0.793        | 14.225 | 6.115e-2 | 3.244e-2 | <b>2.400</b>   | 15.833 | 1.251e-5 | 4.166e-6 |                         |     |       |       |    |    |    |   |   |   |   |  |
| AAL94009.1   periplasmic protein                                           |               |        |          |          |               |        |          |          |               |        |          |          |                |        |          |          |               |        |          |          |                |        |          |          |                         |     |       |       |    |    |    |   |   |   |   |  |
| <b>FN1911</b>                                                              | 0.539         | 21.645 | 2.035e-2 | 2.771e-2 | -0.044        | 21.247 | 1.147e-1 | 6.882e-1 | 0.105         | 21.007 | 3.143e-2 | 1.518e-1 | -0.434         | 21.749 | 3.584e-2 | 4.941e-2 | -0.583        | 21.785 | 4.635e-2 | 1.968e-2 | 0.148          | 21.351 | 4.061e-2 | 1.762e-1 |                         |     |       |       |    |    |    |   |   |   |   |  |
| AAL94010.1   Outer membrane protein                                        |               |        |          |          |               |        |          |          |               |        |          |          |                |        |          |          |               |        |          |          |                |        |          |          |                         |     |       |       |    |    |    |   |   |   |   |  |
| <b>FN1912</b>                                                              | <b>-1.505</b> | 8.335  | 6.81e-4  | 2.483e-4 | <b>-1.482</b> | 8.543  | 3.111e-4 | 6.746e-4 | -2.460        | 7.175  |          |          | -0.955         | 5.874  |          |          | 0.023         | 7.038  | 4.131e-1 | 9.189e-1 | -0.979         | 6.082  |          |          |                         |     |       |       |    |    |    |   |   |   |   |  |
| AAL94011.1   Hypothetical protein                                          |               |        |          |          |               |        |          |          |               |        |          |          |                |        |          |          |               |        |          |          |                |        |          |          |                         |     |       |       |    |    |    |   |   |   |   |  |
| <b>FN1913</b>                                                              | -0.697        | 12.644 | 4.043e-2 | 6.692e-2 | <b>-0.721</b> | 12.805 | 9.018e-4 | 2.628e-3 | <b>-0.991</b> | 12.146 | 2.015e-4 | 2.936e-4 | -0.294         | 11.654 | 1.722e-1 | 4.826e-1 | -0.024        | 12.108 | 4.204e-1 | 9.471e-1 | -0.270         | 11.814 | 8.888e-3 | 3.045e-2 |                         |     |       |       |    |    |    |   |   |   |   |  |
| AAL94012.1   hydrolase (HD superfamily)                                    |               |        |          |          |               |        |          |          |               |        |          |          |                |        |          |          |               |        |          |          |                |        |          |          |                         |     |       |       |    |    |    |   |   |   |   |  |
| <b>FN1914</b>                                                              | 0.655         | 13.979 | 1.845e-1 | 5.025e-1 | -0.288        | 13.220 | 8.128e-3 | 3.655e-2 | <b>-0.623</b> | 12.497 | 1.233e-3 | 3.184e-3 | -1.278         | 13.356 | 1.248e-1 | 3.081e-1 | -0.943        | 13.875 | 2.323e-1 | 3.908e-1 | -0.335         | 12.597 | 1.324e-2 | 4.887e-2 |                         |     |       |       |    |    |    |   |   |   |   |  |
| AAL94013.1   Anti-sigma F factor antagonist                                |               |        |          |          |               |        |          |          |               |        |          |          |                |        |          |          |               |        |          |          |                |        |          |          |                         |     |       |       |    |    |    |   |   |   |   |  |
| <b>FN1917</b>                                                              | 0.608         | 4.561  |          |          | 1.633         | 5.771  |          |          |               |        |          |          |                |        |          |          | 1.025         | 6.379  |          |          |                |        |          |          |                         |     |       |       |    |    |    |   |   |   |   |  |
| AAL94016.1   tRNA delta(2)-isopentenylpyrophosphate transferase            |               |        |          |          |               |        |          |          |               |        |          |          |                |        |          |          |               |        |          |          |                |        |          |          |                         |     |       |       |    |    |    |   |   |   |   |  |
| <b>FN1918</b>                                                              | -0.558        | 11.698 | 7.937e-2 | 1.682e-1 | <b>0.327</b>  | 12.767 | 1.635e-5 | 1.22e-5  | 0.288         | 12.341 | 2.08e-2  | 9.434e-2 | 0.846          | 11.987 | 3.456e-2 | 4.702e-2 | 0.884         | 12.210 | 7.514e-2 | 4.748e-2 | -0.038         | 13.056 | 1.471e-1 | 7.463e-1 |                         |     |       |       |    |    |    |   |   |   |   |  |
| AAL94017.1   SPO0B-associated GTP-binding protein                          |               |        |          |          |               |        |          |          |               |        |          |          |                |        |          |          |               |        |          |          |                |        |          |          |                         |     |       |       |    |    |    |   |   |   |   |  |
| <b>FN1919</b>                                                              | <b>-2.878</b> | 8.684  | 3.404e-5 | 2.617e-6 | <b>-2.663</b> | 9.083  | 2.691e-6 | 7.264e-7 | <b>-2.787</b> | 8.571  | 1.538e-5 | 5.96e-6  | 0.091          | 5.897  | 2.678e-1 | 8.767e-1 | 0.215         | 6.205  | 3.322e-1 | 6.495e-1 | -0.124         | 6.296  | 1.559e-1 | 7.988e-1 |                         |     |       |       |    |    |    |   |   |   |   |  |
| AAL94018.1   Methyltransferase                                             |               |        |          |          |               |        |          |          |               |        |          |          |                |        |          |          |               |        |          |          |                |        |          |          |                         |     |       |       |    |    |    |   |   |   |   |  |
| <b>FN1920</b>                                                              |               |        |          |          |               |        |          |          |               |        |          |          |                |        |          |          | -1.354        | 5.354  |          |          |                |        |          |          |                         |     |       |       |    |    |    |   |   |   |   |  |
| AAL94019.1   tRNA (5-methylaminomethyl-2-thiouridylate) -methyltransferase |               |        |          |          |               |        |          |          |               |        |          |          |                |        |          |          |               |        |          |          |                |        |          |          |                         |     |       |       |    |    |    |   |   |   |   |  |
| <b>FN1922</b>                                                              | <b>0.598</b>  | 7.441  | 2.103e-6 | 7.977e-8 | <b>-0.162</b> | 6.865  | 2.667e-4 | 5.49e-4  | -0.377        | 6.262  |          |          | -0.975         | 7.064  |          |          | <b>-0.761</b> | 7.463  | 8.127e-6 | 2.336e-8 | -0.215         | 6.488  |          |          |                         |     |       |       |    |    |    |   |   |   |   |  |
| AAL94021.1   Hypothetical protein                                          |               |        |          |          |               |        |          |          |               |        |          |          |                |        |          |          |               |        |          |          |                |        |          |          |                         |     |       |       |    |    |    |   |   |   |   |  |
| <b>FN1923</b>                                                              |               |        |          |          | -0.788        | 3.958  |          |          |               |        |          |          |                |        |          |          |               |        |          |          |                |        |          |          |                         |     |       |       |    |    |    |   |   |   |   |  |
| AAL94022.1   Adenine-specific methyltransferase                            |               |        |          |          |               |        |          |          |               |        |          |          |                |        |          |          |               |        |          |          |                |        |          |          |                         |     |       |       |    |    |    |   |   |   |   |  |
| <b>FN1925</b>                                                              |               |        |          |          |               |        |          |          |               |        |          |          |                |        |          |          |               |        |          |          |                |        |          |          |                         |     |       |       |    |    |    |   |   |   |   |  |
| AAL94024.1   Arsenical pump membrane protein                               |               |        |          |          |               |        |          |          |               |        |          |          |                |        |          |          |               |        |          |          |                |        |          |          |                         |     |       |       |    |    |    |   |   |   |   |  |
| <b>FN1926</b>                                                              | 0.597         | 12.116 | 1.235e-1 | 2.962e-1 | <b>0.441</b>  | 12.145 | 1.104e-5 | 6.865e-6 | 0.306         | 11.621 | 2.064e-2 | 9.352e-2 | -0.291         | 12.422 | 1.894e-1 | 5.513e-1 | -0.156        | 12.741 | 3.582e-1 | 7.286e-1 | -0.135         | 12.450 | 6.65e-2  | 3.065e-1 |                         |     |       |       |    |    |    |   |   |   |   |  |
| AAL94025.1   Nitrogen regulatory IIA protein                               |               |        |          |          |               |        |          |          |               |        |          |          |                |        |          |          |               |        |          |          |                |        |          |          |                         |     |       |       |    |    |    |   |   |   |   |  |
| <b>FN1927</b>                                                              | 0.658         | 14.381 | 9.963e-2 | 2.262e-1 | <b>1.612</b>  | 15.520 | 5.807e-5 | 7.498e-5 | <b>-0.585</b> | 12.934 | 1.919e-3 | 5.766e-3 | -1.243         | 13.796 | 5.654e-2 | 9.618e-2 | 0.955         | 16.177 | 5.265e-2 | 2.513e-2 | <b>-2.197</b>  | 14.935 | 2.101e-4 | 2.342e-4 |                         |     |       |       |    |    |    |   |   |   |   |  |
| AAL94026.1   DEGV protein                                                  |               |        |          |          |               |        |          |          |               |        |          |          |                |        |          |          |               |        |          |          |                |        |          |          |                         |     |       |       |    |    |    |   |   |   |   |  |

Show detected proteins only  
 Show all proteins  
 Filter by category:

Proteins found: 1424

Test Cutoff

| Signif | Direction | Applies To   |
|--------|-----------|--------------|
| yes    | +         | ratios, bars |
| no     | n/a       | bars         |
| yes    | -         | ratios, bars |
| yes    | +         | p-, q-Values |
| yes    | -         | p-, q-Values |

FnPg vs Fn — █ — FnSg vs Fn

FnPgSg vs Fn — █ — FnPgSg vs FnPg

FnSg vs FnPg — █ — FnPgSg vs FnSg

Fn Summary Table

FnPg vs Fn

FnSg vs Fn

FnPgSg vs Fn

FnPgSg vs FnPg

FnSg vs FnPg

FnPgSg vs FnSg

Fn Coverage

| ORF           | FnPg vs Fn                                                              |        |          |          | FnSg vs Fn |        |          |          | FnPgSg vs Fn |        |          |          | FnPgSg vs FnPg |        |          |          | FnSg vs FnPg |        |          |          | FnPgSg vs FnSg |        |          |          | Log <sub>2</sub> Ratios |     |       |       |    |    |    |   |   |   |   |  |
|---------------|-------------------------------------------------------------------------|--------|----------|----------|------------|--------|----------|----------|--------------|--------|----------|----------|----------------|--------|----------|----------|--------------|--------|----------|----------|----------------|--------|----------|----------|-------------------------|-----|-------|-------|----|----|----|---|---|---|---|--|
|               | Ratio                                                                   | Sum    | q-Val    | p-Val    | Ratio      | Sum    | q-Val    | p-Val    | Ratio        | Sum    | q-Val    | p-Val    | Ratio          | Sum    | q-Val    | p-Val    | Ratio        | Sum    | q-Val    | p-Val    | Ratio          | Sum    | q-Val    | p-Val    | Ratio                   | Sum | q-Val | p-Val | -6 | -4 | -2 | 0 | 2 | 4 | 6 |  |
| <b>FN1928</b> | 1.094                                                                   | 8.521  |          |          | 0.431      | 8.043  |          |          | 0.186        | 7.409  |          |          | -0.908         | 8.707  |          |          | -0.663       | 9.137  |          |          | -0.245         | 8.229  | 1.09e-1  | 5.294e-1 |                         |     |       |       |    |    |    |   |   |   |   |  |
|               | AAL94027.1   Transcriptional regulator, MerR family                     |        |          |          |            |        |          |          |              |        |          |          |                |        |          |          |              |        |          |          |                |        |          |          |                         |     |       |       |    |    |    |   |   |   |   |  |
| <b>FN1929</b> | -0.664                                                                  | 11.498 | 1.087e-1 | 2.519e-1 | 0.184      | 12.529 | 1.035e-1 | 6.135e-1 | -1.330       | 10.628 | 1.076e-2 | 4.475e-2 | -0.666         | 10.168 | 1.428e-1 | 3.756e-1 | 0.847        | 11.866 | 1.253e-1 | 1.302e-1 | -1.513         | 11.200 | 7.144e-3 | 2.342e-2 |                         |     |       |       |    |    |    |   |   |   |   |  |
|               | AAL94028.1   Competence-damage protein cinA                             |        |          |          |            |        |          |          |              |        |          |          |                |        |          |          |              |        |          |          |                |        |          |          |                         |     |       |       |    |    |    |   |   |   |   |  |
| <b>FN1931</b> | 0.294                                                                   | 5.321  |          |          | 1.095      | 6.306  |          |          |              |        |          |          |                |        |          |          | 0.801        | 6.600  |          |          |                |        |          |          |                         |     |       |       |    |    |    |   |   |   |   |  |
|               | AAL94030.1   Protease                                                   |        |          |          |            |        |          |          |              |        |          |          |                |        |          |          |              |        |          |          |                |        |          |          |                         |     |       |       |    |    |    |   |   |   |   |  |
| <b>FN1933</b> | -1.191                                                                  | 6.775  | 1.782e-3 | 1.088e-3 | -0.669     | 7.482  | 2.596e-2 | 1.364e-1 | -0.152       | 7.611  | 5.258e-2 | 2.737e-1 | 1.040          | 6.623  | 9.028e-3 | 6.443e-3 | 0.522        | 6.291  | 2.27e-1  | 3.773e-1 | 0.517          | 7.330  | 5.416e-2 | 2.44e-1  |                         |     |       |       |    |    |    |   |   |   |   |  |
|               | AAL94032.1   Hypothetical protein                                       |        |          |          |            |        |          |          |              |        |          |          |                |        |          |          |              |        |          |          |                |        |          |          |                         |     |       |       |    |    |    |   |   |   |   |  |
| <b>FN1935</b> | -0.856                                                                  | 6.026  |          |          | -0.378     | 6.688  | 5.619e-2 | 3.163e-1 | -1.754       | 4.924  |          |          | -0.898         | 4.272  |          |          | 0.477        | 5.832  |          |          | -1.375         | 4.934  |          |          |                         |     |       |       |    |    |    |   |   |   |   |  |
|               | AAL94034.1   Adenine-specific methyltransferase                         |        |          |          |            |        |          |          |              |        |          |          |                |        |          |          |              |        |          |          |                |        |          |          |                         |     |       |       |    |    |    |   |   |   |   |  |
| <b>FN1939</b> | 0.385                                                                   | 8.111  |          |          | -0.375     | 7.536  | 5.459e-2 | 3.067e-1 | -0.314       | 7.208  | 2.067e-2 | 9.369e-2 | -0.699         | 7.797  |          |          | -0.760       | 7.920  |          |          | 0.061          | 7.221  | 1.685e-1 | 8.766e-1 |                         |     |       |       |    |    |    |   |   |   |   |  |
|               | AAL94038.1   Hypothetical protein                                       |        |          |          |            |        |          |          |              |        |          |          |                |        |          |          |              |        |          |          |                |        |          |          |                         |     |       |       |    |    |    |   |   |   |   |  |
| <b>FN1941</b> | 1.481                                                                   | 15.151 | 1.812e-4 | 3.292e-5 | 1.994      | 15.848 | 1.202e-3 | 3.715e-3 | -0.193       | 13.273 | 7.688e-3 | 3.029e-2 | -1.674         | 14.958 | 4.273e-6 | 1.14e-7  | 0.513        | 17.330 | 7.283e-2 | 4.464e-2 | -2.187         | 15.656 | 1.467e-3 | 3.14e-3  |                         |     |       |       |    |    |    |   |   |   |   |  |
|               | AAL94040.1   ClpB protein                                               |        |          |          |            |        |          |          |              |        |          |          |                |        |          |          |              |        |          |          |                |        |          |          |                         |     |       |       |    |    |    |   |   |   |   |  |
| <b>FN1942</b> | 1.174                                                                   | 5.735  |          |          | -0.373     | 4.373  |          |          |              |        |          |          |                |        |          |          | -1.547       | 5.547  |          |          |                |        |          |          |                         |     |       |       |    |    |    |   |   |   |   |  |
|               | AAL94041.1   putative DNA-binding protein                               |        |          |          |            |        |          |          |              |        |          |          |                |        |          |          |              |        |          |          |                |        |          |          |                         |     |       |       |    |    |    |   |   |   |   |  |
| <b>FN1943</b> | 2.132                                                                   | 22.304 | 3.643e-3 | 2.929e-3 | 1.724      | 22.081 | 1.794e-5 | 1.398e-5 | -0.290       | 19.679 | 1.37e-3  | 3.709e-3 | -2.422         | 22.014 | 5.062e-3 | 2.568e-3 | -0.408       | 24.213 | 8.632e-2 | 6.342e-2 | -2.014         | 21.791 | 6.105e-5 | 4.534e-5 |                         |     |       |       |    |    |    |   |   |   |   |  |
|               | AAL94042.1   Tryptophanase                                              |        |          |          |            |        |          |          |              |        |          |          |                |        |          |          |              |        |          |          |                |        |          |          |                         |     |       |       |    |    |    |   |   |   |   |  |
| <b>FN1948</b> |                                                                         |        |          |          |            |        |          |          |              |        |          |          |                |        |          |          | 0.350        | 6.149  |          |          |                |        |          |          |                         |     |       |       |    |    |    |   |   |   |   |  |
|               | AAL94044.1   Hypothetical protein                                       |        |          |          |            |        |          |          |              |        |          |          |                |        |          |          |              |        |          |          |                |        |          |          |                         |     |       |       |    |    |    |   |   |   |   |  |
| <b>FN1949</b> | 2.365                                                                   | 9.195  | 2.717e-2 | 3.982e-2 | 2.545      | 9.559  | 1.518e-7 | 1.049e-8 | -1.370       | 5.255  |          |          | -3.735         | 7.824  |          |          | 0.180        | 11.924 | 3.175e-1 | 6.074e-1 | -3.915         | 8.189  |          |          |                         |     |       |       |    |    |    |   |   |   |   |  |
|               | AAL94045.1   Xaa-Pro dipeptidase                                        |        |          |          |            |        |          |          |              |        |          |          |                |        |          |          |              |        |          |          |                |        |          |          |                         |     |       |       |    |    |    |   |   |   |   |  |
| <b>FN1950</b> |                                                                         |        |          |          |            |        |          |          | -3.486       | 8.201  |          |          |                |        |          |          |              |        |          |          |                |        |          |          |                         |     |       |       |    |    |    |   |   |   |   |  |
|               | AAL94046.1   Serine protease                                            |        |          |          |            |        |          |          |              |        |          |          |                |        |          |          |              |        |          |          |                |        |          |          |                         |     |       |       |    |    |    |   |   |   |   |  |
| <b>FN1951</b> |                                                                         |        |          |          | -0.914     | 4.914  |          |          |              |        |          |          |                |        |          |          |              |        |          |          |                |        |          |          |                         |     |       |       |    |    |    |   |   |   |   |  |
|               | AAL94047.1   ATPase associated with chromosome architecture/replication |        |          |          |            |        |          |          |              |        |          |          |                |        |          |          |              |        |          |          |                |        |          |          |                         |     |       |       |    |    |    |   |   |   |   |  |
| <b>FN1956</b> |                                                                         |        |          |          |            |        |          |          |              |        |          |          |                |        |          |          | -0.298       | 7.700  |          |          |                |        |          |          |                         |     |       |       |    |    |    |   |   |   |   |  |
|               | AAL94052.1   Hypothetical protein                                       |        |          |          |            |        |          |          |              |        |          |          |                |        |          |          |              |        |          |          |                |        |          |          |                         |     |       |       |    |    |    |   |   |   |   |  |
| <b>FN1964</b> | -0.609                                                                  | 9.042  | 5.524e-5 | 5.711e-6 | -1.125     | 8.710  | 1.536e-4 | 2.78e-4  | -0.805       | 8.642  | 6.811e-3 | 2.631e-2 | -0.196         | 8.237  | 1.749e-1 | 4.93e-1  | -0.516       | 8.101  | 3.728e-2 | 1.334e-2 | 0.320          | 7.906  | 7.999e-2 | 3.761e-1 |                         |     |       |       |    |    |    |   |   |   |   |  |
|               | AAL94054.1   O-linked GLCNAC transferase                                |        |          |          |            |        |          |          |              |        |          |          |                |        |          |          |              |        |          |          |                |        |          |          |                         |     |       |       |    |    |    |   |   |   |   |  |
| <b>FN1965</b> | 0.486                                                                   | 10.923 | 3.23e-2  | 4.977e-2 | 0.148      | 10.770 | 9.843e-2 | 5.801e-1 | 0.256        | 10.490 | 2.682e-2 | 1.26e-1  | -0.230         | 11.179 | 1.057e-1 | 2.403e-1 | -0.338       | 11.256 | 1.657e-1 | 2.279e-1 | 0.108          | 11.026 | 1.362e-1 | 6.822e-1 |                         |     |       |       |    |    |    |   |   |   |   |  |
|               | AAL94055.1   Tetratricopeptide repeat family protein                    |        |          |          |            |        |          |          |              |        |          |          |                |        |          |          |              |        |          |          |                |        |          |          |                         |     |       |       |    |    |    |   |   |   |   |  |
| <b>FN1966</b> | -0.851                                                                  | 10.944 | 7.543e-3 | 7.998e-3 | 0.307      | 12.286 | 1.663e-2 | 8.362e-2 | -0.059       | 11.533 | 1.202e-1 | 6.915e-1 | 0.792          | 10.885 | 9.561e-3 | 7.033e-3 | 1.158        | 11.435 | 6.287e-3 | 8.25e-4  | -0.366         | 12.227 | 8.625e-3 | 2.939e-2 |                         |     |       |       |    |    |    |   |   |   |   |  |
|               | AAL94056.1   Hypothetical protein                                       |        |          |          |            |        |          |          |              |        |          |          |                |        |          |          |              |        |          |          |                |        |          |          |                         |     |       |       |    |    |    |   |   |   |   |  |

Show detected proteins only

Show all proteins

Filter by category:

GO: amino acid transport

Proteins found:  
1424

Enter (or paste) list of ORFs

Find ORFs

Test

q-Value

p-Value

Cutoff

.005

Dot Plots

Dot Plots

| Signif | Direction | Applies To   |
|--------|-----------|--------------|
| yes    | +         | ratios, bars |
| no     | n/a       | bars         |
| yes    | -         | ratios, bars |
| yes    | +         | p-, q-Values |
| yes    | -         | p-, q-Values |

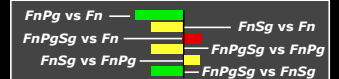

Fn Summary Table

FnPg vs Fn

FnSg vs Fn

FnPgSg vs Fn

FnPgSg vs FnPg

FnSg vs FnPg

FnPgSg vs FnSg

Fn Coverage

| ORF           | FnPg vs Fn                                                    |        |          |          | FnSg vs Fn |        |          |          | FnPgSg vs Fn |        |          |          | FnPgSg vs FnPg |        |          |          | FnSg vs FnPg |        |          |          | FnPgSg vs FnSg |        |          |          | Log <sub>2</sub> Ratios |     |       |       |    |    |    |   |   |   |   |  |
|---------------|---------------------------------------------------------------|--------|----------|----------|------------|--------|----------|----------|--------------|--------|----------|----------|----------------|--------|----------|----------|--------------|--------|----------|----------|----------------|--------|----------|----------|-------------------------|-----|-------|-------|----|----|----|---|---|---|---|--|
|               | Ratio                                                         | Sum    | q-Val    | p-Val    | Ratio      | Sum    | q-Val    | p-Val    | Ratio        | Sum    | q-Val    | p-Val    | Ratio          | Sum    | q-Val    | p-Val    | Ratio        | Sum    | q-Val    | p-Val    | Ratio          | Sum    | q-Val    | p-Val    | Ratio                   | Sum | q-Val | p-Val | -6 | -4 | -2 | 0 | 2 | 4 | 6 |  |
| <b>FN1970</b> |                                                               |        |          |          |            |        |          |          | 1.396        | 6.219  |          |          |                |        |          |          |              |        |          |          |                |        |          |          |                         |     |       |       |    |    |    |   |   |   |   |  |
|               | AAL94060.1   Hemin-binding periplasmic protein hmuT precursor |        |          |          |            |        |          |          |              |        |          |          |                |        |          |          |              |        |          |          |                |        |          |          |                         |     |       |       |    |    |    |   |   |   |   |  |
| <b>FN1971</b> | 0.778                                                         | 9.641  |          |          | -1.568     | 7.478  | 9.772e-4 | 2.897e-3 | 0.109        | 8.767  | 9.539e-2 | 5.332e-1 | -0.670         | 9.749  |          |          | -2.347       | 8.257  |          |          | 1.677          | 7.587  | 5.685e-4 | 8.956e-4 |                         |     |       |       |    |    |    |   |   |   |   |  |
|               | AAL94061.1   Hemin receptor                                   |        |          |          |            |        |          |          |              |        |          |          |                |        |          |          |              |        |          |          |                |        |          |          |                         |     |       |       |    |    |    |   |   |   |   |  |
| <b>FN1972</b> | 2.277                                                         | 9.584  |          |          | 1.441      | 8.932  | 1.657e-2 | 8.333e-2 | 0.231        | 7.335  | 4.225e-2 | 2.142e-1 | -2.046         | 9.816  |          |          | -0.837       | 11.209 |          |          | -1.209         | 9.164  | 2.551e-2 | 1.038e-1 |                         |     |       |       |    |    |    |   |   |   |   |  |
|               | AAL94062.1   unknown                                          |        |          |          |            |        |          |          |              |        |          |          |                |        |          |          |              |        |          |          |                |        |          |          |                         |     |       |       |    |    |    |   |   |   |   |  |
| <b>FN1973</b> | 2.182                                                         | 12.026 | 1.656e-3 | 9.815e-4 | 0.927      | 10.956 | 5.059e-3 | 2.097e-2 | 2.612        | 12.252 | 3.902e-5 | 2.856e-5 | 0.430          | 14.638 | 8.101e-3 | 5.447e-3 | -1.255       | 13.137 | 3.793e-3 | 3.849e-4 | 1.685          | 13.567 | 1.902e-5 | 8.481e-6 |                         |     |       |       |    |    |    |   |   |   |   |  |
|               | AAL94063.1   Translation initiation inhibitor                 |        |          |          |            |        |          |          |              |        |          |          |                |        |          |          |              |        |          |          |                |        |          |          |                         |     |       |       |    |    |    |   |   |   |   |  |
| <b>FN1974</b> |                                                               |        |          |          | -0.437     | 6.052  |          |          |              |        |          |          |                |        |          |          |              |        |          |          |                |        |          |          |                         |     |       |       |    |    |    |   |   |   |   |  |
|               | AAL94064.1   DNA/RNA helicase (DEAD/DEAH BOX family)          |        |          |          |            |        |          |          |              |        |          |          |                |        |          |          |              |        |          |          |                |        |          |          |                         |     |       |       |    |    |    |   |   |   |   |  |
| <b>FN1975</b> | -1.400                                                        | 13.702 | 4.849e-4 | 1.476e-4 | -0.734     | 14.551 | 6.127e-4 | 1.597e-3 | -0.653       | 14.244 | 1.97e-4  | 2.837e-4 | 0.746          | 13.048 | 2.137e-3 | 7.62e-4  | 0.665        | 13.152 | 5.242e-2 | 2.491e-2 | 0.081          | 13.898 | 1.217e-1 | 5.996e-1 |                         |     |       |       |    |    |    |   |   |   |   |  |
|               | AAL94065.1   ATP-dependent RNA helicase                       |        |          |          |            |        |          |          |              |        |          |          |                |        |          |          |              |        |          |          |                |        |          |          |                         |     |       |       |    |    |    |   |   |   |   |  |
| <b>FN1976</b> | -0.800                                                        | 10.426 | 7.915e-2 | 1.675e-1 | 0.411      | 11.821 | 1.555e-2 | 7.767e-2 | -1.202       | 9.819  | 9.477e-4 | 2.23e-3  | -0.403         | 9.223  | 2.016e-1 | 6.031e-1 | 1.211        | 11.021 | 6.886e-2 | 4.014e-2 | -1.613         | 10.618 | 9.677e-4 | 1.855e-3 |                         |     |       |       |    |    |    |   |   |   |   |  |
|               | AAL94066.1   4-amino-4-deoxychorismate lyase                  |        |          |          |            |        |          |          |              |        |          |          |                |        |          |          |              |        |          |          |                |        |          |          |                         |     |       |       |    |    |    |   |   |   |   |  |
| <b>FN1977</b> | 0.237                                                         | 6.286  |          |          | 0.169      | 6.403  | 1.065e-1 | 6.335e-1 | -0.923       | 4.923  |          |          | -1.160         | 5.364  |          |          | -0.068       | 6.640  |          |          | -1.092         | 5.480  |          |          |                         |     |       |       |    |    |    |   |   |   |   |  |
|               | AAL94067.1   Cell cycle protein MesJ                          |        |          |          |            |        |          |          |              |        |          |          |                |        |          |          |              |        |          |          |                |        |          |          |                         |     |       |       |    |    |    |   |   |   |   |  |
| <b>FN1978</b> | -1.935                                                        | 13.741 | 2.614e-3 | 1.852e-3 | -1.358     | 14.502 | 1.201e-5 | 7.948e-6 | -0.599       | 14.873 | 1.937e-4 | 2.766e-4 | 1.336          | 13.142 | 1.571e-2 | 1.528e-2 | 0.577        | 12.567 | 1.734e-1 | 2.467e-1 | 0.759          | 13.903 | 4.993e-4 | 7.463e-4 |                         |     |       |       |    |    |    |   |   |   |   |  |
|               | AAL94068.1   Cell division protein ftsH                       |        |          |          |            |        |          |          |              |        |          |          |                |        |          |          |              |        |          |          |                |        |          |          |                         |     |       |       |    |    |    |   |   |   |   |  |
| <b>FN1979</b> | -2.888                                                        | 10.456 | 2.983e-4 | 7.006e-5 |            |        |          |          | 1.316        | 14.456 | 1.183e-3 | 3.004e-3 | 4.204          | 11.772 | 2.512e-3 | 9.481e-4 |              |        |          |          |                |        |          |          |                         |     |       |       |    |    |    |   |   |   |   |  |
|               | AAL94069.1   SSU ribosomal protein S15P                       |        |          |          |            |        |          |          |              |        |          |          |                |        |          |          |              |        |          |          |                |        |          |          |                         |     |       |       |    |    |    |   |   |   |   |  |
| <b>FN1980</b> |                                                               |        |          |          |            |        |          |          |              |        |          |          |                |        |          |          |              |        |          |          | -0.244         | 4.517  |          |          |                         |     |       |       |    |    |    |   |   |   |   |  |
|               | AAL94070.1   Transporter                                      |        |          |          |            |        |          |          |              |        |          |          |                |        |          |          |              |        |          |          |                |        |          |          |                         |     |       |       |    |    |    |   |   |   |   |  |
| <b>FN1983</b> | -1.070                                                        | 16.582 | 6.53e-4  | 2.317e-4 | -1.088     | 16.748 | 5.663e-6 | 2.333e-6 | 0.554        | 18.002 | 2.665e-3 | 8.536e-3 | 1.624          | 17.136 | 1.102e-3 | 2.838e-4 | -0.019       | 15.679 | 4.017e-1 | 8.765e-1 | 1.642          | 17.302 | 4.642e-4 | 6.762e-4 |                         |     |       |       |    |    |    |   |   |   |   |  |
|               | AAL94073.1   Alkyl hydroperoxide reductase C22 protein        |        |          |          |            |        |          |          |              |        |          |          |                |        |          |          |              |        |          |          |                |        |          |          |                         |     |       |       |    |    |    |   |   |   |   |  |
| <b>FN1984</b> | 0.205                                                         | 16.782 | 1.926e-1 | 5.319e-1 | -0.591     | 16.170 | 4.172e-4 | 9.723e-4 | 0.514        | 16.887 | 2.091e-3 | 6.385e-3 | 0.309          | 17.296 | 1.223e-1 | 2.988e-1 | -0.796       | 16.375 | 1.125e-1 | 1.059e-1 | 1.105          | 16.684 | 5.058e-4 | 7.595e-4 |                         |     |       |       |    |    |    |   |   |   |   |  |
|               | AAL94074.1   Thioredoxin reductase                            |        |          |          |            |        |          |          |              |        |          |          |                |        |          |          |              |        |          |          |                |        |          |          |                         |     |       |       |    |    |    |   |   |   |   |  |
| <b>FN1985</b> | -0.583                                                        | 12.690 | 1.336e-1 | 3.273e-1 | -0.248     | 13.209 | 2.038e-2 | 1.046e-1 | -0.717       | 12.352 | 1.767e-3 | 5.194e-3 | -0.134         | 11.973 | 2.613e-1 | 8.482e-1 | 0.335        | 12.626 | 3.078e-1 | 5.806e-1 | -0.469         | 12.492 | 1.799e-3 | 4.055e-3 |                         |     |       |       |    |    |    |   |   |   |   |  |
|               | AAL94075.1   Inner membrane protein                           |        |          |          |            |        |          |          |              |        |          |          |                |        |          |          |              |        |          |          |                |        |          |          |                         |     |       |       |    |    |    |   |   |   |   |  |
| <b>FN1986</b> | -0.000                                                        | 16.421 | 3.094e-1 | 9.99e-1  | -0.445     | 16.161 | 1.66e-2  | 8.349e-2 | -0.356       | 15.861 | 2.635e-3 | 8.419e-3 | -0.356         | 16.065 | 6.746e-2 | 1.227e-1 | -0.445       | 16.160 | 1.209e-1 | 1.211e-1 | 0.089          | 15.805 | 1.387e-1 | 6.968e-1 |                         |     |       |       |    |    |    |   |   |   |   |  |
|               | AAL94076.1   Hypothetical protein                             |        |          |          |            |        |          |          |              |        |          |          |                |        |          |          |              |        |          |          |                |        |          |          |                         |     |       |       |    |    |    |   |   |   |   |  |
| <b>FN1987</b> | 2.122                                                         | 7.705  |          |          | -0.299     | 5.469  |          |          | -0.545       | 4.834  | 1.357e-3 | 3.658e-3 | -2.667         | 7.160  |          |          | -2.421       | 7.591  |          |          | -0.246         | 4.924  |          |          |                         |     |       |       |    |    |    |   |   |   |   |  |
|               | AAL94077.1   Transcriptional regulator, GntR family           |        |          |          |            |        |          |          |              |        |          |          |                |        |          |          |              |        |          |          |                |        |          |          |                         |     |       |       |    |    |    |   |   |   |   |  |
| <b>FN1988</b> | 3.596                                                         | 15.052 | 3.588e-2 | 5.713e-2 | 4.705      | 16.346 | 1.624e-3 | 5.33e-3  | 0.987        | 12.239 | 3.608e-4 | 6.525e-4 | -2.609         | 16.039 | 4.636e-2 | 7.101e-2 | 1.109        | 19.941 | 6.103e-2 | 3.232e-2 | -3.718         | 17.333 | 2.444e-3 | 5.965e-3 |                         |     |       |       |    |    |    |   |   |   |   |  |
|               | AAL94078.1   Tyrosine phenol-lyase                            |        |          |          |            |        |          |          |              |        |          |          |                |        |          |          |              |        |          |          |                |        |          |          |                         |     |       |       |    |    |    |   |   |   |   |  |

Show detected proteins only  
 Show all proteins  
 Filter by category:

Proteins found: 1424

Enter (or paste) list of ORFs

Find ORFs

Test Cutoff

q-Value .005

p-Value

Dot Plots

| Signif | Direction | Applies To   |
|--------|-----------|--------------|
| yes    | +         | ratios, bars |
| no     | n/a       | bars         |
| yes    | -         | ratios, bars |
| yes    | +         | p-, q-Values |
| yes    | -         | p-, q-Values |

FnPg vs Fn — █ — FnSg vs Fn  
 FnPgSg vs Fn — █ — FnPgSg vs FnPg  
 FnSg vs FnPg — █ — FnPgSg vs FnSg





Fn Summary Table FnPg vs Fn FnSg vs Fn FnPgSg vs Fn FnPgSg vs FnPg FnSg vs FnPg FnPgSg vs FnSg Fn Coverage

| ORF                                                                   | FnPg vs Fn |        |          |           | FnSg vs Fn |        |          |          | FnPgSg vs Fn |        |          |          | FnPgSg vs FnPg |        |          |          | FnSg vs FnPg |        |          |          | FnPgSg vs FnSg |        |          |           | Log <sub>2</sub> Ratios |     |       |       |    |    |    |   |   |   |   |  |
|-----------------------------------------------------------------------|------------|--------|----------|-----------|------------|--------|----------|----------|--------------|--------|----------|----------|----------------|--------|----------|----------|--------------|--------|----------|----------|----------------|--------|----------|-----------|-------------------------|-----|-------|-------|----|----|----|---|---|---|---|--|
|                                                                       | Ratio      | Sum    | q-Val    | p-Val     | Ratio      | Sum    | q-Val    | p-Val    | Ratio        | Sum    | q-Val    | p-Val    | Ratio          | Sum    | q-Val    | p-Val    | Ratio        | Sum    | q-Val    | p-Val    | Ratio          | Sum    | q-Val    | p-Val     | Ratio                   | Sum | q-Val | p-Val | -6 | -4 | -2 | 0 | 2 | 4 | 6 |  |
| <b>FN2018</b>                                                         | -1.837     | 9.299  | 1.959e-3 | 1.25e-3   | -1.817     | 9.504  | 3.3e-5   | 3.28e-5  | -0.729       | 10.204 | 3.476e-4 | 6.186e-4 | 1.108          | 8.570  | 2.515e-2 | 2.937e-2 | 0.021        | 7.667  | 4.257e-1 | 9.677e-1 | 1.088          | 8.775  | 2.493e-4 | 2.997e-4  |                         |     |       |       |    |    |    |   |   |   |   |  |
| AAL94108.1   Single-stranded-DNA-specific exonuclease recJ            |            |        |          |           |            |        |          |          |              |        |          |          |                |        |          |          |              |        |          |          |                |        |          |           |                         |     |       |       |    |    |    |   |   |   |   |  |
| <b>FN2019</b>                                                         | -0.242     | 10.866 |          |           | -3.061     | 8.231  |          |          | -0.674       | 10.230 | 1.126e-2 | 4.709e-2 | -0.432         | 10.192 |          |          | -2.820       | 7.990  |          |          | 2.387          | 7.557  |          |           |                         |     |       |       |    |    |    |   |   |   |   |  |
| AAL94109.1   Ribosome-binding factor A                                |            |        |          |           |            |        |          |          |              |        |          |          |                |        |          |          |              |        |          |          |                |        |          |           |                         |     |       |       |    |    |    |   |   |   |   |  |
| <b>FN2020</b>                                                         | -0.269     | 16.155 | 7.182e-3 | 7.491e-3  | 0.002      | 16.611 | 1.571e-1 | 9.905e-1 | -0.211       | 16.009 | 6.937e-5 | 6.416e-5 | 0.058          | 15.945 | 1.263e-1 | 3.136e-1 | 0.271        | 16.342 | 1.647e-1 | 2.254e-1 | -0.213         | 16.400 | 6.688e-2 | 3.084e-1  |                         |     |       |       |    |    |    |   |   |   |   |  |
| AAL94110.1   Bacterial Protein Translation Initiation Factor 2 (IF-2) |            |        |          |           |            |        |          |          |              |        |          |          |                |        |          |          |              |        |          |          |                |        |          |           |                         |     |       |       |    |    |    |   |   |   |   |  |
| <b>FN2022</b>                                                         | -1.021     | 12.451 | 1.198e-8 | 4.849e-11 | -0.330     | 13.326 | 4.754e-4 | 1.149e-3 | -0.503       | 12.765 | 7.657e-6 | 2.177e-6 | 0.518          | 11.948 | 3.487e-5 | 1.551e-6 | 0.690        | 12.305 | 3.297e-3 | 3.129e-4 | -0.172         | 12.823 | 3.686e-3 | 9.988e-3  |                         |     |       |       |    |    |    |   |   |   |   |  |
| AAL94112.1   N utilization substance protein A                        |            |        |          |           |            |        |          |          |              |        |          |          |                |        |          |          |              |        |          |          |                |        |          |           |                         |     |       |       |    |    |    |   |   |   |   |  |
| <b>FN2023</b>                                                         | 0.590      | 7.446  | 1.739e-1 | 4.628e-1  | 0.634      | 7.675  | 2.435e-3 | 8.665e-3 | 0.064        | 6.716  | 1.182e-1 | 6.787e-1 | -0.526         | 7.510  | 1.771e-1 | 5.018e-1 | 0.044        | 8.265  | 4.195e-1 | 9.433e-1 | -0.570         | 7.739  | 4.309e-3 | 1.233e-2  |                         |     |       |       |    |    |    |   |   |   |   |  |
| AAL94113.1   Hypothetical cytosolic protein                           |            |        |          |           |            |        |          |          |              |        |          |          |                |        |          |          |              |        |          |          |                |        |          |           |                         |     |       |       |    |    |    |   |   |   |   |  |
| <b>FN2030</b>                                                         | -2.984     | 13.505 | 3.26e-5  | 2.451e-6  | -2.696     | 13.977 | 1.006e-4 | 1.575e-4 | -0.842       | 15.443 | 1.972e-4 | 2.842e-4 | 2.142          | 12.663 | 2.631e-4 | 3.529e-5 | 0.288        | 10.993 | 2.211e-1 | 3.625e-1 | 1.854          | 13.135 | 1.219e-4 | 1.117e-4  |                         |     |       |       |    |    |    |   |   |   |   |  |
| AAL94115.1   Inorganic pyrophosphatase                                |            |        |          |           |            |        |          |          |              |        |          |          |                |        |          |          |              |        |          |          |                |        |          |           |                         |     |       |       |    |    |    |   |   |   |   |  |
| <b>FN2031</b>                                                         | -1.652     | 6.561  |          |           | -2.199     | 6.199  |          |          | -0.397       | 7.612  | 5.555e-2 | 2.913e-1 | 1.255          | 6.164  |          |          | -0.547       | 4.547  |          |          | 1.801          | 5.801  |          |           |                         |     |       |       |    |    |    |   |   |   |   |  |
| AAL94116.1   Thiamine biosynthesis lipoprotein appE                   |            |        |          |           |            |        |          |          |              |        |          |          |                |        |          |          |              |        |          |          |                |        |          |           |                         |     |       |       |    |    |    |   |   |   |   |  |
| <b>FN2033</b>                                                         | 0.225      | 8.498  |          |           | -0.528     | 7.929  |          |          |              |        |          |          |                |        |          |          | -0.753       | 8.154  |          |          |                |        |          |           |                         |     |       |       |    |    |    |   |   |   |   |  |
| AAL94118.1   Guanylate kinase                                         |            |        |          |           |            |        |          |          |              |        |          |          |                |        |          |          |              |        |          |          |                |        |          |           |                         |     |       |       |    |    |    |   |   |   |   |  |
| <b>FN2034</b>                                                         | -0.476     | 8.706  | 9.662e-2 | 2.172e-1  | -0.761     | 8.605  | 3.446e-3 | 1.336e-2 | 0.512        | 9.490  | 4.057e-3 | 1.417e-2 | 0.987          | 9.218  | 2.408e-2 | 2.759e-2 | -0.285       | 8.130  | 2.835e-1 | 5.167e-1 | 1.273          | 9.117  | 4.011e-5 | 2.53e-5   |                         |     |       |       |    |    |    |   |   |   |   |  |
| AAL94119.1   Protein yicC                                             |            |        |          |           |            |        |          |          |              |        |          |          |                |        |          |          |              |        |          |          |                |        |          |           |                         |     |       |       |    |    |    |   |   |   |   |  |
| <b>FN2035</b>                                                         | -0.356     | 18.018 | 2.15e-2  | 2.966e-2  | -0.199     | 18.360 | 1.235e-2 | 5.959e-2 | -0.320       | 17.851 | 1.616e-4 | 2.134e-4 | 0.036          | 17.698 | 2.41e-1  | 7.613e-1 | 0.157        | 18.004 | 1.824e-1 | 2.683e-1 | -0.121         | 18.040 | 4.997e-2 | 2.227e-1  |                         |     |       |       |    |    |    |   |   |   |   |  |
| AAL94120.1   DNA-directed RNA polymerase beta' chain                  |            |        |          |           |            |        |          |          |              |        |          |          |                |        |          |          |              |        |          |          |                |        |          |           |                         |     |       |       |    |    |    |   |   |   |   |  |
| <b>FN2036</b>                                                         | -0.901     | 17.232 | 3.329e-3 | 2.596e-3  | -0.392     | 17.925 | 8.896e-4 | 2.585e-3 | -0.543       | 17.386 | 4.911e-4 | 9.764e-4 | 0.358          | 16.689 | 6.347e-2 | 1.131e-1 | 0.508        | 17.024 | 6.91e-2  | 4.04e-2  | -0.151         | 17.382 | 1.088e-2 | 3.88e-2   |                         |     |       |       |    |    |    |   |   |   |   |  |
| AAL94121.1   DNA-directed RNA polymerase beta chain                   |            |        |          |           |            |        |          |          |              |        |          |          |                |        |          |          |              |        |          |          |                |        |          |           |                         |     |       |       |    |    |    |   |   |   |   |  |
| <b>FN2037</b>                                                         | 0.290      | 19.709 | 2.004e-1 | 5.588e-1  | -0.522     | 19.081 | 2.186e-2 | 1.13e-1  | 2.706        | 21.921 | 2.355e-5 | 1.146e-5 | 2.416          | 22.416 | 1.069e-3 | 2.693e-4 | -0.812       | 19.372 | 1.645e-1 | 2.249e-1 | 3.228          | 21.788 | 1.093e-6 | 1.38e-7   |                         |     |       |       |    |    |    |   |   |   |   |  |
| AAL94122.1   LSU ribosomal protein L12P (L7/L12)                      |            |        |          |           |            |        |          |          |              |        |          |          |                |        |          |          |              |        |          |          |                |        |          |           |                         |     |       |       |    |    |    |   |   |   |   |  |
| <b>FN2038</b>                                                         | -0.837     | 16.073 | 4.147e-2 | 6.929e-2  | -1.449     | 15.646 | 1.934e-3 | 6.543e-3 | 0.235        | 16.942 | 3.202e-2 | 1.552e-1 | 1.072          | 16.309 | 2.7e-2   | 3.258e-2 | -0.612       | 14.809 | 2.041e-1 | 3.221e-1 | 1.684          | 15.881 | 2.981e-9 | 3.763e-11 |                         |     |       |       |    |    |    |   |   |   |   |  |
| AAL94123.1   LSU ribosomal protein L10P                               |            |        |          |           |            |        |          |          |              |        |          |          |                |        |          |          |              |        |          |          |                |        |          |           |                         |     |       |       |    |    |    |   |   |   |   |  |
| <b>FN2039</b>                                                         | -0.613     | 16.846 | 1.035e-3 | 4.962e-4  | -0.652     | 16.992 | 1.718e-3 | 5.69e-3  | -0.291       | 16.964 | 2.548e-4 | 4.082e-4 | 0.322          | 16.555 | 3.595e-3 | 1.615e-3 | -0.039       | 16.379 | 3.701e-1 | 7.671e-1 | 0.361          | 16.701 | 1.01e-2  | 3.546e-2  |                         |     |       |       |    |    |    |   |   |   |   |  |
| AAL94124.1   LSU ribosomal protein L1P                                |            |        |          |           |            |        |          |          |              |        |          |          |                |        |          |          |              |        |          |          |                |        |          |           |                         |     |       |       |    |    |    |   |   |   |   |  |
| <b>FN2040</b>                                                         | -1.158     | 12.697 | 7.93e-3  | 8.544e-3  | -2.637     | 11.403 | 5.239e-4 | 1.306e-3 | 0.868        | 14.519 | 2.292e-4 | 3.552e-4 | 2.026          | 13.565 | 5.44e-4  | 1.016e-4 | -1.479       | 10.245 | 9.707e-2 | 8.072e-2 | 3.504          | 12.270 | 1.581e-4 | 1.596e-4  |                         |     |       |       |    |    |    |   |   |   |   |  |
| AAL94125.1   LSU ribosomal protein L11P                               |            |        |          |           |            |        |          |          |              |        |          |          |                |        |          |          |              |        |          |          |                |        |          |           |                         |     |       |       |    |    |    |   |   |   |   |  |
| <b>FN2041</b>                                                         | 0.560      | 12.042 | 1.587e-1 | 4.09e-1   | -1.140     | 10.526 | 2.006e-4 | 3.838e-4 | -0.606       | 10.671 | 3.983e-4 | 7.467e-4 | -1.166         | 11.436 | 9.352e-2 | 1.971e-1 | -1.700       | 11.086 | 1.258e-1 | 1.312e-1 | 0.534          | 9.920  | 3.5e-3   | 9.337e-3  |                         |     |       |       |    |    |    |   |   |   |   |  |
| AAL94126.1   Transcription antitermination protein nusG               |            |        |          |           |            |        |          |          |              |        |          |          |                |        |          |          |              |        |          |          |                |        |          |           |                         |     |       |       |    |    |    |   |   |   |   |  |
| <b>FN2045</b>                                                         |            |        |          |           |            |        |          |          |              |        |          |          |                |        |          |          | -0.556       | 7.969  |          |          |                |        |          |           |                         |     |       |       |    |    |    |   |   |   |   |  |
| AAL94129.1   Ferric uptake regulation protein                         |            |        |          |           |            |        |          |          |              |        |          |          |                |        |          |          |              |        |          |          |                |        |          |           |                         |     |       |       |    |    |    |   |   |   |   |  |

Show detected proteins only  
 Show all proteins  
 Filter by category:

Proteins found: 1424

Test Cutoff

| Signif | Direction | Applies To   |
|--------|-----------|--------------|
| yes    | +         | ratios, bars |
| no     | n/a       | bars         |
| yes    | -         | ratios, bars |
| yes    | +         | p-, q-Values |
| yes    | -         | p-, q-Values |

FnPg vs Fn █ FnSg vs Fn █

FnPgSg vs FnPg █ FnPgSg vs FnPg █

FnSg vs FnPg █ FnPgSg vs FnSg █



Fn Summary Table

FnPg vs Fn

FnSg vs Fn

FnPgSg vs Fn

FnPgSg vs FnPg

FnSg vs FnPg

FnPgSg vs FnSg

Fn Coverage

| ORF           | FnPg vs Fn                                                  |        |          |          | FnSg vs Fn |        |          |          | FnPgSg vs Fn |        |          |          | FnPgSg vs FnPg |        |          |          | FnSg vs FnPg |        |          |          | FnPgSg vs FnSg |        |          |          | Log <sub>2</sub> Ratios |     |       |       |    |    |    |   |   |   |   |  |
|---------------|-------------------------------------------------------------|--------|----------|----------|------------|--------|----------|----------|--------------|--------|----------|----------|----------------|--------|----------|----------|--------------|--------|----------|----------|----------------|--------|----------|----------|-------------------------|-----|-------|-------|----|----|----|---|---|---|---|--|
|               | Ratio                                                       | Sum    | q-Val    | p-Val    | Ratio      | Sum    | q-Val    | p-Val    | Ratio        | Sum    | q-Val    | p-Val    | Ratio          | Sum    | q-Val    | p-Val    | Ratio        | Sum    | q-Val    | p-Val    | Ratio          | Sum    | q-Val    | p-Val    | Ratio                   | Sum | q-Val | p-Val | -6 | -4 | -2 | 0 | 2 | 4 | 6 |  |
| <b>FN2069</b> | AAL94153.1   Amino acid carrier protein alST                |        |          |          |            |        |          |          |              |        |          |          |                |        |          |          |              |        |          |          |                |        |          |          |                         |     |       |       |    |    |    |   |   |   |   |  |
| <b>FN2070</b> | -0.830                                                      | 7.749  |          |          | -0.680     | 8.083  | 4.726e-6 | 1.736e-6 | -2.188       | 6.188  |          |          | -1.358         | 5.561  |          |          | 0.150        | 7.253  |          |          | -1.507         | 5.895  |          |          |                         |     |       |       |    |    |    |   |   |   |   |  |
|               | AAL94154.1   Cobyric acid synthase                          |        |          |          |            |        |          |          |              |        |          |          |                |        |          |          |              |        |          |          |                |        |          |          |                         |     |       |       |    |    |    |   |   |   |   |  |
| <b>FN2073</b> | 0.466                                                       | 9.147  | 1.814e-1 | 4.908e-1 | 1.727      | 10.592 | 2.867e-3 | 1.06e-2  | -0.859       | 7.618  | 1.318e-3 | 3.504e-3 | -1.325         | 8.288  | 8.984e-2 | 1.853e-1 | 1.261        | 11.058 | 5.149e-2 | 2.403e-2 | -2.586         | 9.733  | 2.449e-3 | 5.982e-3 |                         |     |       |       |    |    |    |   |   |   |   |  |
|               | AAL94157.1   Adenine phosphoribosyltransferase              |        |          |          |            |        |          |          |              |        |          |          |                |        |          |          |              |        |          |          |                |        |          |          |                         |     |       |       |    |    |    |   |   |   |   |  |
| <b>FN2074</b> |                                                             |        |          |          |            |        |          |          |              |        |          |          | 0.874          | 4.044  |          |          |              |        |          |          |                |        |          |          |                         |     |       |       |    |    |    |   |   |   |   |  |
|               | AAL94158.1   BsIM                                           |        |          |          |            |        |          |          |              |        |          |          |                |        |          |          |              |        |          |          |                |        |          |          |                         |     |       |       |    |    |    |   |   |   |   |  |
| <b>FN2075</b> | -1.552                                                      | 10.261 | 2.351e-6 | 9.778e-8 | -1.773     | 10.224 | 6.886e-4 | 1.864e-3 | -0.932       | 10.677 | 8.5e-4   | 1.941e-3 | 0.620          | 9.329  | 3.111e-2 | 4.011e-2 | -0.222       | 8.673  | 3.026e-2 | 5.664e-1 | 0.841          | 9.292  | 1.359e-2 | 5.034e-2 |                         |     |       |       |    |    |    |   |   |   |   |  |
|               | AAL94159.1   Hypothetical protein                           |        |          |          |            |        |          |          |              |        |          |          |                |        |          |          |              |        |          |          |                |        |          |          |                         |     |       |       |    |    |    |   |   |   |   |  |
| <b>FN2076</b> |                                                             |        |          |          |            |        |          |          |              |        |          |          |                |        |          |          |              |        |          |          |                |        |          |          |                         |     |       |       |    |    |    |   |   |   |   |  |
|               | AAL94160.1   MunI regulatory protein                        |        |          |          |            |        |          |          |              |        |          |          |                |        |          |          |              |        |          |          |                |        |          |          |                         |     |       |       |    |    |    |   |   |   |   |  |
| <b>FN2078</b> | -0.696                                                      | 3.866  |          |          | 0.627      | 5.373  |          |          |              |        |          |          |                |        |          |          | 1.323        | 4.677  |          |          |                |        |          |          |                         |     |       |       |    |    |    |   |   |   |   |  |
|               | AAL94162.1   Transcriptional regulator, DeoR family         |        |          |          |            |        |          |          |              |        |          |          |                |        |          |          |              |        |          |          |                |        |          |          |                         |     |       |       |    |    |    |   |   |   |   |  |
| <b>FN2081</b> |                                                             |        |          |          |            |        |          |          |              |        |          |          |                |        |          |          |              |        |          |          |                |        |          |          |                         |     |       |       |    |    |    |   |   |   |   |  |
|               | AAL94165.1   ABC transporter substrate-binding protein      |        |          |          |            |        |          |          |              |        |          |          |                |        |          |          |              |        |          |          |                |        |          |          |                         |     |       |       |    |    |    |   |   |   |   |  |
| <b>FN2082</b> | 0.066                                                       | 20.838 | 2.795e-1 | 8.648e-1 | 0.195      | 21.152 | 1.292e-2 | 6.282e-2 | 0.006        | 20.575 | 1.619e-1 | 9.778e-1 | -0.060         | 20.845 | 2.705e-1 | 8.89e-1  | 0.129        | 21.217 | 3.573e-1 | 7.257e-1 | -0.188         | 21.158 | 8.588e-2 | 4.064e-1 |                         |     |       |       |    |    |    |   |   |   |   |  |
|               | AAL94166.1   Formate--tetrahydrofolate ligase               |        |          |          |            |        |          |          |              |        |          |          |                |        |          |          |              |        |          |          |                |        |          |          |                         |     |       |       |    |    |    |   |   |   |   |  |
| <b>FN2093</b> | -0.816                                                      | 10.423 | 5.559e-2 | 1.038e-1 | -1.909     | 9.515  | 7.33e-5  | 1.061e-4 | -0.781       | 10.254 | 4.272e-3 | 1.511e-2 | 0.035          | 9.642  | 2.836e-1 | 9.489e-1 | -1.092       | 8.699  | 1.561e-1 | 2.051e-1 | 1.127          | 8.734  | 7.759e-3 | 2.596e-2 |                         |     |       |       |    |    |    |   |   |   |   |  |
|               | AAL94177.1   General secretion pathway protein G            |        |          |          |            |        |          |          |              |        |          |          |                |        |          |          |              |        |          |          |                |        |          |          |                         |     |       |       |    |    |    |   |   |   |   |  |
| <b>FN2098</b> |                                                             |        |          |          |            |        |          |          |              |        |          |          | -1.026         | 4.400  |          |          | 0.662        | 6.272  | 9.451e-2 | 7.707e-2 | -1.688         | 5.246  |          |          |                         |     |       |       |    |    |    |   |   |   |   |  |
|               | AAL94182.1   MRP-family nucleotide-binding protein          |        |          |          |            |        |          |          |              |        |          |          |                |        |          |          |              |        |          |          |                |        |          |          |                         |     |       |       |    |    |    |   |   |   |   |  |
| <b>FN2100</b> | -1.098                                                      | 11.054 | 2.063e-3 | 1.352e-3 | -1.352     | 10.984 | 5.926e-8 | 2.217e-9 | -0.577       | 11.371 | 6.915e-6 | 1.863e-6 | 0.521          | 10.477 | 2.095e-2 | 2.267e-2 | -0.254       | 9.886  | 1.564e-1 | 2.059e-1 | 0.775          | 10.407 | 3.135e-5 | 1.727e-5 |                         |     |       |       |    |    |    |   |   |   |   |  |
|               | AAL94184.1   Hypothetical protein                           |        |          |          |            |        |          |          |              |        |          |          |                |        |          |          |              |        |          |          |                |        |          |          |                         |     |       |       |    |    |    |   |   |   |   |  |
| <b>FN2102</b> | -0.535                                                      | 8.617  | 5.344e-2 | 9.817e-2 | 0.005      | 9.342  | 1.537e-1 | 9.65e-1  | -1.320       | 7.629  | 1.419e-3 | 3.898e-3 | -0.784         | 7.298  | 7.281e-2 | 1.364e-1 | 0.540        | 8.807  | 1.079e-1 | 9.792e-2 | -1.324         | 8.022  | 3.408e-3 | 9.02e-3  |                         |     |       |       |    |    |    |   |   |   |   |  |
|               | AAL94186.1   ABC transporter ATP-binding protein            |        |          |          |            |        |          |          |              |        |          |          |                |        |          |          |              |        |          |          |                |        |          |          |                         |     |       |       |    |    |    |   |   |   |   |  |
| <b>FN2103</b> | -0.584                                                      | 19.422 | 1.5e-2   | 1.858e-2 | -0.489     | 19.701 | 5.074e-4 | 1.251e-3 | -0.354       | 19.448 | 2.946e-4 | 4.93e-4  | 0.230          | 19.069 | 1.024e-1 | 2.28e-1  | 0.094        | 19.117 | 3.212e-1 | 6.177e-1 | 0.136          | 19.347 | 3.788e-2 | 1.626e-1 |                         |     |       |       |    |    |    |   |   |   |   |  |
|               | AAL94187.1   tricarboxylate-binding protein                 |        |          |          |            |        |          |          |              |        |          |          |                |        |          |          |              |        |          |          |                |        |          |          |                         |     |       |       |    |    |    |   |   |   |   |  |
| <b>FN2105</b> | -0.841                                                      | 6.455  |          |          |            |        |          |          | 0.010        | 7.103  | 1.571e-1 | 9.434e-1 | 0.851          | 6.466  |          |          |              |        |          |          |                |        |          |          |                         |     |       |       |    |    |    |   |   |   |   |  |
|               | AAL94189.1   tricarboxylate transport membrane protein RctA |        |          |          |            |        |          |          |              |        |          |          |                |        |          |          |              |        |          |          |                |        |          |          |                         |     |       |       |    |    |    |   |   |   |   |  |
| <b>FN2106</b> | 0.480                                                       | 15.105 | 1.619e-1 | 4.202e-1 | -0.528     | 14.281 | 5.001e-4 | 1.227e-3 | -0.334       | 14.087 | 9.885e-4 | 2.356e-3 | -0.814         | 14.771 | 1.085e-1 | 2.51e-1  | -1.009       | 14.761 | 1.525e-1 | 1.965e-1 | 0.194          | 13.947 | 7.47e-3  | 2.475e-2 |                         |     |       |       |    |    |    |   |   |   |   |  |
|               | AAL94190.1   Transporter                                    |        |          |          |            |        |          |          |              |        |          |          |                |        |          |          |              |        |          |          |                |        |          |          |                         |     |       |       |    |    |    |   |   |   |   |  |
| <b>FN2107</b> | -1.519                                                      | 11.505 | 5.936e-3 | 5.733e-3 | -2.959     | 10.249 | 4.61e-4  | 1.104e-3 | -0.627       | 12.192 | 4.277e-3 | 1.513e-2 | 0.891          | 10.878 | 5.318e-2 | 8.754e-2 | -1.441       | 8.730  | 1.394e-1 | 1.617e-1 | 2.332          | 9.622  | 2.264e-6 | 3.328e-7 |                         |     |       |       |    |    |    |   |   |   |   |  |
|               | AAL94191.1   Galactokinase                                  |        |          |          |            |        |          |          |              |        |          |          |                |        |          |          |              |        |          |          |                |        |          |          |                         |     |       |       |    |    |    |   |   |   |   |  |

Show detected proteins only

Show all proteins

Filter by category:

GO: amino acid transport

Proteins found: 1424

Enter (or paste) list of ORFs

Find ORFs

Test Cutoff

q-Value .005

p-Value

Dot Plots

Dot Plots

| Signif | Direction | Applies To   |
|--------|-----------|--------------|
| yes    | +         | ratios, bars |
| no     | n/a       | bars         |
| yes    | -         | ratios, bars |
| yes    | +         | p-, q-Values |
| yes    | -         | p-, q-Values |

FnPg vs Fn

FnPgSg vs Fn

FnSg vs FnPg

FnSg vs Fn

FnPgSg vs FnPg

FnPgSg vs FnSg

Fn Summary Table FnPg vs Fn FnSg vs Fn FnPgSg vs Fn FnPgSg vs FnPg FnSg vs FnPg FnPgSg vs FnSg Fn Coverage

| ORF           | FnPg vs Fn                                                      |        |          |          | FnSg vs Fn |        |          |          | FnPgSg vs Fn |        |          |          | FnPgSg vs FnPg |        |          |          | FnSg vs FnPg |        |          |          | FnPgSg vs FnSg |        |          |          | Log <sub>2</sub> Ratios |     |       |       |    |    |    |   |   |   |   |  |
|---------------|-----------------------------------------------------------------|--------|----------|----------|------------|--------|----------|----------|--------------|--------|----------|----------|----------------|--------|----------|----------|--------------|--------|----------|----------|----------------|--------|----------|----------|-------------------------|-----|-------|-------|----|----|----|---|---|---|---|--|
|               | Ratio                                                           | Sum    | q-Val    | p-Val    | Ratio      | Sum    | q-Val    | p-Val    | Ratio        | Sum    | q-Val    | p-Val    | Ratio          | Sum    | q-Val    | p-Val    | Ratio        | Sum    | q-Val    | p-Val    | Ratio          | Sum    | q-Val    | p-Val    | Ratio                   | Sum | q-Val | p-Val | -6 | -4 | -2 | 0 | 2 | 4 | 6 |  |
| <b>FN2108</b> | -0.937                                                          | 10.048 | 5.403e-3 | 5.046e-3 | -1.343     | 9.826  | 9.941e-4 | 2.957e-3 | -0.390       | 10.391 | 1.343e-2 | 5.75e-2  | 0.547          | 9.658  | 7.714e-3 | 4.98e-3  | -0.407       | 8.889  | 4.741e-2 | 2.051e-2 | 0.954          | 9.436  | 3.829e-4 | 5.266e-4 |                         |     |       |       |    |    |    |   |   |   |   |  |
|               | AAL94192.1   Galactose-1-phosphate uridylyltransferase          |        |          |          |            |        |          |          |              |        |          |          |                |        |          |          |              |        |          |          |                |        |          |          |                         |     |       |       |    |    |    |   |   |   |   |  |
| <b>FN2109</b> | 0.357                                                           | 12.048 | 5.849e-2 | 1.117e-1 | -0.173     | 11.703 | 9.735e-3 | 4.533e-2 | 0.186        | 11.674 | 2.964e-3 | 9.74e-3  | -0.171         | 12.235 | 1.342e-1 | 3.441e-1 | -0.530       | 12.060 | 7.629e-2 | 4.895e-2 | 0.359          | 11.889 | 8.152e-4 | 1.479e-3 |                         |     |       |       |    |    |    |   |   |   |   |  |
|               | AAL94193.1   UDP-glucose 4-epimerase                            |        |          |          |            |        |          |          |              |        |          |          |                |        |          |          |              |        |          |          |                |        |          |          |                         |     |       |       |    |    |    |   |   |   |   |  |
| <b>FN2116</b> | -1.796                                                          | 11.084 |          |          | -2.952     | 10.112 | 5.602e-6 | 2.29e-6  | -3.826       | 8.850  | 9.781e-5 | 1.053e-4 | -2.030         | 7.258  |          |          | -1.156       | 8.316  |          |          | -0.874         | 6.286  | 3.594e-2 | 1.531e-1 |                         |     |       |       |    |    |    |   |   |   |   |  |
|               | AAL94200.1   Hypothetical exported 24-amino acid repeat protein |        |          |          |            |        |          |          |              |        |          |          |                |        |          |          |              |        |          |          |                |        |          |          |                         |     |       |       |    |    |    |   |   |   |   |  |
| <b>FN2117</b> | -1.864                                                          | 7.034  |          |          | -1.371     | 7.711  |          |          |              |        |          |          |                |        |          |          | 0.493        | 5.847  |          |          |                |        |          |          |                         |     |       |       |    |    |    |   |   |   |   |  |
|               | AAL94201.1   Hypothetical exported 24-amino acid repeat protein |        |          |          |            |        |          |          |              |        |          |          |                |        |          |          |              |        |          |          |                |        |          |          |                         |     |       |       |    |    |    |   |   |   |   |  |
| <b>FN2118</b> | -2.982                                                          | 8.596  |          |          | -3.296     | 8.466  |          |          | -1.537       | 9.837  | 1.799e-4 | 2.482e-4 | 1.444          | 7.059  |          |          | -0.315       | 5.485  |          |          | 1.759          | 6.929  |          |          |                         |     |       |       |    |    |    |   |   |   |   |  |
|               | AAL94202.1   Hypothetical exported 24-amino acid repeat protein |        |          |          |            |        |          |          |              |        |          |          |                |        |          |          |              |        |          |          |                |        |          |          |                         |     |       |       |    |    |    |   |   |   |   |  |
| <b>FN2119</b> | 0.059                                                           | 10.437 |          |          | -1.111     | 9.452  | 7.31e-4  | 2.023e-3 | -0.938       | 9.237  | 1.852e-4 | 2.59e-4  | -0.996         | 9.500  |          |          | -1.170       | 9.511  |          |          | 0.173          | 8.514  | 1.09e-1  | 5.294e-1 |                         |     |       |       |    |    |    |   |   |   |   |  |
|               | AAL94203.1   Hypothetical exported 24-amino acid repeat protein |        |          |          |            |        |          |          |              |        |          |          |                |        |          |          |              |        |          |          |                |        |          |          |                         |     |       |       |    |    |    |   |   |   |   |  |
| <b>FN2120</b> |                                                                 |        |          |          |            |        |          |          |              |        |          |          |                |        |          |          |              |        |          |          |                |        |          |          |                         |     |       |       |    |    |    |   |   |   |   |  |
|               | AAL94204.1   Hypothetical exported 24-amino acid repeat protein |        |          |          |            |        |          |          |              |        |          |          |                |        |          |          |              |        |          |          |                |        |          |          |                         |     |       |       |    |    |    |   |   |   |   |  |
| <b>FN2121</b> | -1.562                                                          | 13.957 | 1.544e-2 | 1.929e-2 | -4.149     | 11.554 |          |          | -1.244       | 14.071 | 1.016e-5 | 3.242e-6 | 0.317          | 12.713 | 2.038e-1 | 6.13e-1  | -2.588       | 9.992  |          |          | 2.905          | 10.309 |          |          |                         |     |       |       |    |    |    |   |   |   |   |  |
|               | AAL94205.1   Hypothetical exported 24-amino acid repeat protein |        |          |          |            |        |          |          |              |        |          |          |                |        |          |          |              |        |          |          |                |        |          |          |                         |     |       |       |    |    |    |   |   |   |   |  |
| <b>FN2122</b> | 0.322                                                           | 17.106 | 6.198e-2 | 1.216e-1 | -0.033     | 16.936 | 3.383e-2 | 1.829e-1 | -0.165       | 16.415 | 1.034e-2 | 4.28e-2  | -0.487         | 16.941 | 3.608e-2 | 4.988e-2 | -0.355       | 17.257 | 1.096e-1 | 1.008e-1 | -0.132         | 16.770 | 1.905e-2 | 7.448e-2 |                         |     |       |       |    |    |    |   |   |   |   |  |
|               | AAL94206.1   Phenylalanyl-tRNA synthetase beta chain            |        |          |          |            |        |          |          |              |        |          |          |                |        |          |          |              |        |          |          |                |        |          |          |                         |     |       |       |    |    |    |   |   |   |   |  |
| <b>FN2123</b> | -0.043                                                          | 13.279 | 2.912e-1 | 9.161e-1 | 0.116      | 13.623 | 1.097e-1 | 6.545e-1 | -0.650       | 12.469 | 1.363e-3 | 3.681e-3 | -0.606         | 12.629 | 1.18e-1  | 2.833e-1 | 0.160        | 13.580 | 3.568e-1 | 7.243e-1 | -0.766         | 12.973 | 1.906e-2 | 7.453e-2 |                         |     |       |       |    |    |    |   |   |   |   |  |
|               | AAL94207.1   Phenylalanyl-tRNA synthetase alpha chain           |        |          |          |            |        |          |          |              |        |          |          |                |        |          |          |              |        |          |          |                |        |          |          |                         |     |       |       |    |    |    |   |   |   |   |  |
| <b>FN2125</b> | -1.221                                                          | 13.987 | 1.167e-2 | 1.362e-2 | -1.475     | 13.917 | 6.497e-5 | 8.833e-5 | -1.679       | 13.325 | 1.06e-5  | 3.434e-6 | -0.458         | 12.308 | 1.447e-1 | 3.824e-1 | -0.254       | 12.696 | 3.099e-1 | 5.864e-1 | -0.204         | 12.238 | 7.585e-3 | 2.523e-2 |                         |     |       |       |    |    |    |   |   |   |   |  |
|               | AAL94209.1   DNA gyrase subunit A                               |        |          |          |            |        |          |          |              |        |          |          |                |        |          |          |              |        |          |          |                |        |          |          |                         |     |       |       |    |    |    |   |   |   |   |  |
| <b>FN2126</b> | -1.937                                                          | 11.781 | 3.32e-4  | 8.134e-5 | -2.209     | 11.693 | 9.972e-5 | 1.558e-4 | -0.407       | 13.107 | 3.654e-4 | 6.646e-4 | 1.530          | 11.374 | 1.21e-4  | 1.281e-5 | -0.272       | 9.756  | 2.109e-1 | 3.38e-1  | 1.802          | 11.286 | 7.438e-5 | 5.847e-5 |                         |     |       |       |    |    |    |   |   |   |   |  |
|               | AAL94210.1   DNA gyrase subunit B                               |        |          |          |            |        |          |          |              |        |          |          |                |        |          |          |              |        |          |          |                |        |          |          |                         |     |       |       |    |    |    |   |   |   |   |  |
| <b>FN2128</b> |                                                                 |        |          |          |            |        |          |          |              |        |          |          |                |        |          |          |              |        |          |          |                |        |          |          |                         |     |       |       |    |    |    |   |   |   |   |  |
|               | AAL94212.1   RECF protein                                       |        |          |          |            |        |          |          |              |        |          |          |                |        |          |          |              |        |          |          |                |        |          |          |                         |     |       |       |    |    |    |   |   |   |   |  |

Show detected proteins only  
 Show all proteins

Filter by category:  
GO: amino acid transport

Proteins found: 1424

Enter (or paste) list of ORFs

Find ORFs

Test Cutoff

q-Value p-Value

.005

Dot Plots

| Signif | Direction | Applies To   |
|--------|-----------|--------------|
| yes    | +         | ratios, bars |
| no     | n/a       | bars         |
| yes    | -         | ratios, bars |
| yes    | +         | p-, q-Values |
| yes    | -         | p-, q-Values |

FnPg vs Fn — █ — FnSg vs Fn

FnPgSg vs Fn — █ — FnPgSg vs FnPg

FnSg vs FnPg — █ — FnPgSg vs FnSg
