# Supplementary material for: Proteomics of Fusobacterium nucleatum within a model developing oral microbial community
Source: PubMed Central journal article supplement (PMC4234264; doi:10.1002/mbo3.204), 2014-08-25
Supplement: mbo30003-0729-sd4.pdf [file mbo30003-0729-sd4.pdf]

| ORF    | Fn Summary Table |          |       | FnPg vs Fn |          |       | FnSg vs Fn |          |       | FnPgSg vs Fn |          |       | FnPgSg vs FnPg                                                 |          |      | FnSg vs FnPg |       |        | FnPgSg vs FnSg |        |       | Fn Coverage |        |        |  |
|--------|------------------|----------|-------|------------|----------|-------|------------|----------|-------|--------------|----------|-------|----------------------------------------------------------------|----------|------|--------------|-------|--------|----------------|--------|-------|-------------|--------|--------|--|
|        | Fn               |          |       | FnPg       |          |       | FnSg       |          |       | FnPgSg       |          |       | Description                                                    |          |      |              | Fn    |        | FnPg           |        | FnSg  |             | FnPgSg |        |  |
|        | n                | coverage | prob  | n          | coverage | prob  | n          | coverage | prob  | n            | coverage | prob  | n                                                              | coverage | prob | Description  | Rep I | Rep II | Rep I          | Rep II | Rep I | Rep II      | Rep I  | Rep II |  |
| FN0001 | 8                | 12.4%    | 1.000 | 7          | 7.7%     | 1.000 | 6          | 11.5%    | 1.000 | 6            | 12.2%    | 1.000 | AAL94214.1  Chromosomal replication initiator protein dnaA     |          |      |              |       |        |                |        |       |             |        |        |  |
|        | 9                | 14.0%    | 1.000 | 3          | 5.8%     | 1.000 | 9          | 12.9%    | 1.000 | 3            | 6.9%     | 0.998 |                                                                |          |      |              |       |        |                |        |       |             |        |        |  |
| FN0004 | 5                | 34.1%    | 1.000 | 2          | 11.2%    | 1.000 | 4          | 22.0%    | 1.000 | 3            | 18.0%    | 1.000 | AAL94217.1  Inner membrane protein                             |          |      |              |       |        |                |        |       |             |        |        |  |
|        | 3                | 18.0%    | 1.000 | 4          | 22.0%    | 1.000 | 3          | 15.1%    | 1.000 | 3            | 18.0%    | 1.000 |                                                                |          |      |              |       |        |                |        |       |             |        |        |  |
| FN0005 | 6                | 30.7%    | 1.000 | 4          | 25.8%    | 1.000 | 3          | 19.6%    | 1.000 | 5            | 30.1%    | 1.000 | AAL94218.1  Jag protein                                        |          |      |              |       |        |                |        |       |             |        |        |  |
|        | 7                | 30.7%    | 1.000 | 4          | 25.2%    | 1.000 | 6          | 34.4%    | 1.000 | 8            | 34.4%    | 1.000 |                                                                |          |      |              |       |        |                |        |       |             |        |        |  |
| FN0006 | 6                | 14.9%    | 1.000 | 2          | 5.1%     | 0.999 | 10         | 30.5%    | 1.000 | 6            | 20.9%    | 1.000 | AAL94219.1  Thiophene and furan oxidation protein THDF         |          |      |              |       |        |                |        |       |             |        |        |  |
|        | 7                | 21.8%    | 1.000 | 9          | 26.6%    | 1.000 | 11         | 32.7%    | 1.000 | 5            | 13.2%    | 1.000 |                                                                |          |      |              |       |        |                |        |       |             |        |        |  |
| FN0007 | 10               | 18.9%    | 1.000 | 5          | 7.0%     | 1.000 | 4          | 10.5%    | 1.000 | 6            | 14.2%    | 1.000 | AAL94220.1  Glucose inhibited division protein A               |          |      |              |       |        |                |        |       |             |        |        |  |
|        | 11               | 26.8%    | 1.000 | 6          | 13.4%    | 1.000 | 9          | 17.4%    | 1.000 | 3            | 7.6%     | 0.999 |                                                                |          |      |              |       |        |                |        |       |             |        |        |  |
| FN0008 | 0                | 0.0%     |       | 0          | 0.0%     | 0.000 | 3          | 16.1%    | 1.000 | 0            | 0.0%     |       | AAL94221.1  Quinolinate synthetase A                           |          |      |              |       |        |                |        |       |             |        |        |  |
|        | 0                | 0.0%     |       | 3          | 17.4%    | 1.000 | 3          | 17.4%    | 1.000 | 0            | 0.0%     |       |                                                                |          |      |              |       |        |                |        |       |             |        |        |  |
| FN0009 | 0                | 0.0%     |       | 0          | 0.0%     | 0.000 | 2          | 5.1%     | 0.997 | 2            | 11.5%    | 0.707 | AAL94222.1  L-aspartate oxidase                                |          |      |              |       |        |                |        |       |             |        |        |  |
|        | 0                | 0.0%     |       | 16         | 34.7%    | 1.000 | 14         | 32.6%    | 1.000 | 0            | 0.0%     | 0.000 |                                                                |          |      |              |       |        |                |        |       |             |        |        |  |
| FN0017 | 4                | 8.4%     | 1.000 | 0          | 0.0%     | 0.000 | 3          | 6.3%     | 0.999 | 0            | 0.0%     | 0.000 | AAL94230.1  Hypothetical protein                               |          |      |              |       |        |                |        |       |             |        |        |  |
|        | 4                | 8.7%     | 1.000 | 1          | 3.1%     | 0.753 | 4          | 13.5%    | 1.000 | 1            | 5.1%     | 0.320 |                                                                |          |      |              |       |        |                |        |       |             |        |        |  |
| FN0018 | 8                | 47.4%    | 1.000 | 2          | 9.6%     | 0.743 | 5          | 36.5%    | 1.000 | 8            | 55.1%    | 1.000 | AAL94231.1  Hypothetical protein                               |          |      |              |       |        |                |        |       |             |        |        |  |
|        | 10               | 48.1%    | 1.000 | 5          | 34.0%    | 1.000 | 6          | 35.9%    | 1.000 | 7            | 42.9%    | 1.000 |                                                                |          |      |              |       |        |                |        |       |             |        |        |  |
| FN0019 | 2                | 2.0%     | 0.455 | 2          | 3.5%     | 1.000 | 5          | 5.9%     | 0.997 | 0            | 0.0%     | 0.000 | AAL94232.1  Transcription-repair coupling factor               |          |      |              |       |        |                |        |       |             |        |        |  |
|        | 3                | 3.5%     | 0.869 | 2          | 2.0%     | 0.762 | 3          | 3.1%     | 0.993 | 4            | 6.2%     | 0.910 |                                                                |          |      |              |       |        |                |        |       |             |        |        |  |
| FN0021 | 1                | 7.8%     | 0.981 | 0          | 0.0%     | 0.000 | 1          | 3.1%     | 0.796 | 1            | 5.4%     | 0.539 | AAL94234.1  4-diphosphocytidyl-2-C-methyl-D-erythritol kinase  |          |      |              |       |        |                |        |       |             |        |        |  |
|        | 3                | 16.0%    | 1.000 | 2          | 8.5%     | 0.994 | 2          | 5.4%     | 0.996 | 1            | 3.1%     | 0.986 |                                                                |          |      |              |       |        |                |        |       |             |        |        |  |
| FN0022 | 8                | 64.5%    | 1.000 | 8          | 48.4%    | 1.000 | 3          | 17.2%    | 1.000 | 6            | 46.2%    | 1.000 | AAL94235.1  Hypothetical protein                               |          |      |              |       |        |                |        |       |             |        |        |  |
|        | 7                | 48.4%    | 1.000 | 3          | 33.3%    | 1.000 | 5          | 34.4%    | 1.000 | 6            | 46.2%    | 1.000 |                                                                |          |      |              |       |        |                |        |       |             |        |        |  |
| FN0023 | 1                | 3.0%     | 0.977 | 1          | 4.0%     | 0.984 | 1          | 2.0%     | 0.977 | 1            | 2.0%     | 0.966 | AAL94236.1  Short-chain fatty acids transporter                |          |      |              |       |        |                |        |       |             |        |        |  |
|        | 2                | 7.4%     | 0.812 | 3          | 7.8%     | 1.000 | 3          | 8.0%     | 0.999 | 3            | 9.8%     | 1.000 |                                                                |          |      |              |       |        |                |        |       |             |        |        |  |
| FN0024 | 14               | 45.6%    | 1.000 | 3          | 19.7%    | 1.000 | 2          | 14.5%    | 0.994 | 9            | 39.5%    | 1.000 | AAL94237.1  Hypothetical exported 24-amino acid repeat protein |          |      |              |       |        |                |        |       |             |        |        |  |
|        | 13               | 43.0%    | 1.000 | 8          | 46.1%    | 1.000 | 5          | 31.6%    | 1.000 | 7            | 36.0%    | 1.000 |                                                                |          |      |              |       |        |                |        |       |             |        |        |  |
| FN0025 | 6                | 33.1%    | 1.000 | 1          | 17.5%    | 0.271 | 0          | 0.0%     | 0.000 | 2            | 19.3%    | 0.997 | AAL94238.1  Hypothetical exported 24-amino acid repeat protein |          |      |              |       |        |                |        |       |             |        |        |  |
|        | 6                | 35.5%    | 1.000 | 3          | 21.7%    | 1.000 | 3          | 20.5%    | 0.994 | 3            | 23.5%    | 0.999 |                                                                |          |      |              |       |        |                |        |       |             |        |        |  |
| FN0026 | 3                | 20.0%    | 1.000 | 0          | 0.0%     | 0.000 | 0          | 0.0%     | 0.000 | 4            | 20.0%    | 1.000 | AAL94239.1  Hypothetical exported 24-amino acid repeat protein |          |      |              |       |        |                |        |       |             |        |        |  |
|        | 4                | 25.2%    | 1.000 | 2          | 14.8%    | 1.000 | 1          | 6.5%     | 0.917 | 3            | 14.8%    | 1.000 |                                                                |          |      |              |       |        |                |        |       |             |        |        |  |

Show detected proteins only  
 Show all proteins  
 Filter by category:

Proteins found:  
 1424

Enter (or paste) list of ORFs

| ORF    | Fn Summary Table |          |       | FnPg vs Fn |          |       | FnSg vs Fn |          |       | FnPgSg vs Fn |          |       | FnPgSg vs FnPg                                                            |          |      | FnSg vs FnPg |       |        | FnPgSg vs FnSg |        |       | Fn Coverage |        |        |  |
|--------|------------------|----------|-------|------------|----------|-------|------------|----------|-------|--------------|----------|-------|---------------------------------------------------------------------------|----------|------|--------------|-------|--------|----------------|--------|-------|-------------|--------|--------|--|
|        | Fn               |          |       | FnPg       |          |       | FnSg       |          |       | FnPgSg       |          |       | Description                                                               |          |      |              | Fn    |        | FnPg           |        | FnSg  |             | FnPgSg |        |  |
|        | n                | coverage | prob  | n          | coverage | prob  | n          | coverage | prob  | n            | coverage | prob  | n                                                                         | coverage | prob | Description  | Rep I | Rep II | Rep I          | Rep II | Rep I | Rep II      | Rep I  | Rep II |  |
| FN0029 | 4                | 32.2%    | 1.000 | 1          | 9.8%     | 0.981 | 1          | 9.8%     | 0.985 | 3            | 21.0%    | 0.998 | AAL94242.1   Flavodoxin                                                   |          |      |              |       |        |                |        |       |             |        |        |  |
|        | 5                | 49.7%    | 1.000 | 2          | 16.1%    | 0.999 | 2          | 16.1%    | 1.000 | 2            | 16.1%    | 0.999 |                                                                           |          |      |              |       |        |                |        |       |             |        |        |  |
| FN0030 | 13               | 63.9%    | 1.000 | 10         | 65.2%    | 1.000 | 12         | 67.7%    | 1.000 | 12           | 60.1%    | 1.000 | AAL94243.1   5-nitroimidazole antibiotic resistance protein               |          |      |              |       |        |                |        |       |             |        |        |  |
|        | 13               | 63.9%    | 1.000 | 20         | 77.2%    | 1.000 | 16         | 67.7%    | 1.000 | 15           | 77.8%    | 1.000 |                                                                           |          |      |              |       |        |                |        |       |             |        |        |  |
| FN0031 | 6                | 26.2%    | 1.000 | 8          | 34.3%    | 1.000 | 7          | 29.9%    | 1.000 | 4            | 15.1%    | 1.000 | AAL94244.1   unknown                                                      |          |      |              |       |        |                |        |       |             |        |        |  |
|        | 3                | 12.9%    | 1.000 | 9          | 30.6%    | 1.000 | 8          | 26.9%    | 1.000 | 6            | 28.0%    | 1.000 |                                                                           |          |      |              |       |        |                |        |       |             |        |        |  |
| FN0033 | 31               | 19.5%    | 1.000 | 26         | 17.1%    | 1.000 | 28         | 18.2%    | 1.000 | 26           | 17.8%    | 1.000 | AAL94246.1   unknown                                                      |          |      |              |       |        |                |        |       |             |        |        |  |
|        | 29               | 19.2%    | 1.000 | 26         | 19.1%    | 1.000 | 34         | 24.3%    | 1.000 | 21           | 14.1%    | 1.000 |                                                                           |          |      |              |       |        |                |        |       |             |        |        |  |
| FN0034 | 8                | 56.0%    | 1.000 | 6          | 46.8%    | 1.000 | 8          | 48.6%    | 1.000 | 8            | 56.0%    | 1.000 | AAL94247.1   unknown                                                      |          |      |              |       |        |                |        |       |             |        |        |  |
|        | 6                | 45.4%    | 1.000 | 8          | 42.1%    | 1.000 | 7          | 37.5%    | 1.000 | 9            | 56.5%    | 1.000 |                                                                           |          |      |              |       |        |                |        |       |             |        |        |  |
| FN0038 | 1                | 9.0%     | 0.975 | 5          | 32.0%    | 1.000 | 0          | 0.0%     | 0.000 | 1            | 9.0%     | 0.956 | AAL94251.1   unknown                                                      |          |      |              |       |        |                |        |       |             |        |        |  |
|        | 0                | 0.0%     | 0.000 | 0          | 0.0%     | 0.000 | 1          | 9.0%     | 0.978 | 1            | 9.0%     | 0.975 |                                                                           |          |      |              |       |        |                |        |       |             |        |        |  |
| FN0039 | 4                | 25.1%    | 1.000 | 1          | 10.9%    | 0.984 | 4          | 25.7%    | 1.000 | 2            | 16.4%    | 1.000 | AAL94252.1   DNA primase (bacterial type) and small primase-like proteins |          |      |              |       |        |                |        |       |             |        |        |  |
|        | 3                | 16.4%    | 1.000 | 5          | 28.4%    | 1.000 | 6          | 34.4%    | 1.000 | 2            | 16.4%    | 1.000 |                                                                           |          |      |              |       |        |                |        |       |             |        |        |  |
| FN0040 | 44               | 65.7%    | 1.000 | 33         | 60.1%    | 1.000 | 44         | 65.9%    | 1.000 | 45           | 63.8%    | 1.000 | AAL94253.1   Asparaginyl-tRNA synthetase                                  |          |      |              |       |        |                |        |       |             |        |        |  |
|        | 44               | 57.7%    | 1.000 | 42         | 67.2%    | 1.000 | 43         | 69.2%    | 1.000 | 43           | 64.4%    | 1.000 |                                                                           |          |      |              |       |        |                |        |       |             |        |        |  |
| FN0041 | 5                | 37.1%    | 1.000 | 2          | 25.8%    | 0.998 | 1          | 19.4%    | 0.974 | 3            | 30.6%    | 0.999 | AAL94254.1   unknown                                                      |          |      |              |       |        |                |        |       |             |        |        |  |
|        | 5                | 37.1%    | 1.000 | 3          | 33.9%    | 1.000 | 0          | 0.0%     | 0.000 | 3            | 33.9%    | 1.000 |                                                                           |          |      |              |       |        |                |        |       |             |        |        |  |
| FN0043 | 7                | 34.2%    | 1.000 | 0          | 0.0%     | 0.000 | 1          | 10.1%    | 0.985 | 3            | 25.3%    | 1.000 | AAL94256.1   Hypothetical exported 24-amino acid repeat protein           |          |      |              |       |        |                |        |       |             |        |        |  |
|        | 4                | 24.1%    | 1.000 | 4          | 27.8%    | 1.000 | 2          | 8.2%     | 0.999 | 1            | 6.3%     | 0.438 |                                                                           |          |      |              |       |        |                |        |       |             |        |        |  |
| FN0045 | 5                | 34.1%    | 1.000 | 1          | 5.2%     | 0.622 | 2          | 11.6%    | 0.996 | 1            | 6.4%     | 0.982 | AAL94258.1   Shikimate 5-dehydrogenase                                    |          |      |              |       |        |                |        |       |             |        |        |  |
|        | 3                | 15.7%    | 1.000 | 2          | 11.2%    | 0.999 | 3          | 25.3%    | 1.000 | 2            | 13.7%    | 0.977 |                                                                           |          |      |              |       |        |                |        |       |             |        |        |  |
| FN0046 | 3                | 17.7%    | 1.000 | 4          | 42.9%    | 1.000 | 1          | 10.2%    | 0.985 | 2            | 21.1%    | 0.993 | AAL94259.1   3-dehydroquinate dehydratase                                 |          |      |              |       |        |                |        |       |             |        |        |  |
|        | 3                | 30.6%    | 1.000 | 1          | 10.2%    | 0.972 | 2          | 16.3%    | 0.997 | 3            | 36.7%    | 0.995 |                                                                           |          |      |              |       |        |                |        |       |             |        |        |  |
| FN0047 | 15               | 36.4%    | 1.000 | 14         | 39.5%    | 1.000 | 17         | 60.5%    | 1.000 | 15           | 51.8%    | 1.000 | AAL94260.1   Exodeoxyribonuclease III                                     |          |      |              |       |        |                |        |       |             |        |        |  |
|        | 14               | 39.5%    | 1.000 | 18         | 55.7%    | 1.000 | 19         | 59.7%    | 1.000 | 13           | 46.2%    | 1.000 |                                                                           |          |      |              |       |        |                |        |       |             |        |        |  |
| FN0048 | 9                | 27.4%    | 1.000 | 4          | 10.3%    | 1.000 | 9          | 19.8%    | 1.000 | 5            | 19.4%    | 1.000 | AAL94261.1   4-nitrophenylphosphatase                                     |          |      |              |       |        |                |        |       |             |        |        |  |
|        | 9                | 25.4%    | 1.000 | 9          | 32.1%    | 1.000 | 11         | 36.9%    | 1.000 | 7            | 19.4%    | 1.000 |                                                                           |          |      |              |       |        |                |        |       |             |        |        |  |
| FN0049 | 2                | 9.3%     | 0.985 | 4          | 35.2%    | 1.000 | 5          | 56.2%    | 1.000 | 0            | 0.0%     | 0.000 | AAL94262.1   Hypothetical protein                                         |          |      |              |       |        |                |        |       |             |        |        |  |
|        | 3                | 29.0%    | 1.000 | 7          | 51.9%    | 1.000 | 9          | 56.2%    | 1.000 | 2            | 9.3%     | 0.994 |                                                                           |          |      |              |       |        |                |        |       |             |        |        |  |
| FN0050 | 40               | 55.9%    | 1.000 | 27         | 45.0%    | 1.000 | 30         | 55.9%    | 1.000 | 37           | 59.9%    | 1.000 | AAL94263.1   Fumarate reductase flavoprotein subunit                      |          |      |              |       |        |                |        |       |             |        |        |  |
|        | 39               | 62.5%    | 1.000 | 38         | 59.3%    | 1.000 | 29         | 53.2%    | 1.000 | 41           | 57.7%    | 1.000 |                                                                           |          |      |              |       |        |                |        |       |             |        |        |  |

Show detected proteins only  
 Show all proteins  
 Filter by category:

Proteins found:  
 1424

Enter (or paste) list of ORFs

| ORF    | Fn Summary Table |          |       | FnPg vs Fn |          |       | FnSg vs Fn |          |       | FnPgSg vs Fn |          |       | FnPgSg vs FnPg                                                                   |          |      | FnSg vs FnPg |       |        | FnPgSg vs FnSg |        |       | Fn Coverage |        |        |  |
|--------|------------------|----------|-------|------------|----------|-------|------------|----------|-------|--------------|----------|-------|----------------------------------------------------------------------------------|----------|------|--------------|-------|--------|----------------|--------|-------|-------------|--------|--------|--|
|        | Fn               |          |       | FnPg       |          |       | FnSg       |          |       | FnPgSg       |          |       | Description                                                                      |          |      |              | Fn    |        | FnPg           |        | FnSg  |             | FnPgSg |        |  |
|        | n                | coverage | prob  | n          | coverage | prob  | n          | coverage | prob  | n            | coverage | prob  | n                                                                                | coverage | prob | Description  | Rep I | Rep II | Rep I          | Rep II | Rep I | Rep II      | Rep I  | Rep II |  |
| FN0052 | 10               | 60.8%    | 1.000 | 4          | 29.2%    | 1.000 | 0          | 0.0%     | 0.000 | 5            | 36.7%    | 1.000 | AAL94265.1  Arsenate reductase                                                   |          |      |              |       |        |                |        |       |             |        |        |  |
|        | 11               | 60.8%    | 1.000 | 2          | 18.3%    | 1.000 | 1          | 8.3%     | 0.984 | 8            | 49.2%    | 1.000 |                                                                                  |          |      |              |       |        |                |        |       |             |        |        |  |
| FN0054 | 30               | 45.1%    | 1.000 | 25         | 50.2%    | 1.000 | 26         | 51.5%    | 1.000 | 30           | 56.4%    | 1.000 | AAL94267.1  Tyrosyl-tRNA synthetase                                              |          |      |              |       |        |                |        |       |             |        |        |  |
|        | 33               | 49.0%    | 1.000 | 32         | 55.9%    | 1.000 | 28         | 51.5%    | 1.000 | 30           | 51.5%    | 1.000 |                                                                                  |          |      |              |       |        |                |        |       |             |        |        |  |
| FN0058 | 23               | 45.6%    | 1.000 | 15         | 46.3%    | 1.000 | 22         | 52.1%    | 1.000 | 26           | 64.0%    | 1.000 | AAL94271.1  Cysteine desulfhydrase                                               |          |      |              |       |        |                |        |       |             |        |        |  |
|        | 19               | 39.5%    | 1.000 | 25         | 64.2%    | 1.000 | 33         | 75.1%    | 1.000 | 19           | 55.7%    | 1.000 |                                                                                  |          |      |              |       |        |                |        |       |             |        |        |  |
| FN0059 | 8                | 64.1%    | 1.000 | 4          | 48.4%    | 1.000 | 8          | 56.2%    | 1.000 | 7            | 63.3%    | 1.000 | AAL94272.1  NifU protein                                                         |          |      |              |       |        |                |        |       |             |        |        |  |
|        | 6                | 72.7%    | 1.000 | 6          | 56.2%    | 1.000 | 10         | 72.7%    | 1.000 | 6            | 56.2%    | 1.000 |                                                                                  |          |      |              |       |        |                |        |       |             |        |        |  |
| FN0060 | 9                | 25.3%    | 1.000 | 3          | 8.7%     | 0.999 | 0          | 0.0%     | 0.000 | 8            | 23.9%    | 1.000 | AAL94273.1  D-alanyl-D-alanine carboxypeptidase                                  |          |      |              |       |        |                |        |       |             |        |        |  |
|        | 8                | 20.7%    | 1.000 | 6          | 22.3%    | 1.000 | 3          | 11.1%    | 1.000 | 6            | 19.0%    | 1.000 |                                                                                  |          |      |              |       |        |                |        |       |             |        |        |  |
| FN0061 | 26               | 46.0%    | 1.000 | 13         | 22.8%    | 1.000 | 24         | 38.3%    | 1.000 | 24           | 42.7%    | 1.000 | AAL94274.1  Thermostable carboxypeptidase 1                                      |          |      |              |       |        |                |        |       |             |        |        |  |
|        | 27               | 46.0%    | 1.000 | 28         | 44.0%    | 1.000 | 23         | 33.5%    | 1.000 | 21           | 38.5%    | 1.000 |                                                                                  |          |      |              |       |        |                |        |       |             |        |        |  |
| FN0062 | 4                | 25.0%    | 1.000 | 1          | 11.5%    | 0.345 | 0          | 0.0%     |       | 4            | 25.0%    | 1.000 | AAL94275.1  Hypothetical cytosolic protein                                       |          |      |              |       |        |                |        |       |             |        |        |  |
|        | 4                | 27.1%    | 1.000 | 4          | 27.1%    | 1.000 | 0          | 0.0%     |       | 4            | 25.0%    | 1.000 |                                                                                  |          |      |              |       |        |                |        |       |             |        |        |  |
| FN0063 | 0                | 0.0%     |       | 0          | 0.0%     | 0.000 | 1          | 10.0%    | 0.984 | 0            | 0.0%     |       | AAL94276.1  unknown                                                              |          |      |              |       |        |                |        |       |             |        |        |  |
|        | 0                | 0.0%     |       | 1          | 8.2%     | 0.939 | 3          | 13.6%    | 1.000 | 0            | 0.0%     |       |                                                                                  |          |      |              |       |        |                |        |       |             |        |        |  |
| FN0065 | 35               | 43.0%    | 1.000 | 19         | 28.4%    | 1.000 | 23         | 30.2%    | 1.000 | 29           | 38.5%    | 1.000 | AAL94278.1  Transcription accessory protein (S1 RNA binding domain)              |          |      |              |       |        |                |        |       |             |        |        |  |
|        | 36               | 44.5%    | 1.000 | 30         | 39.4%    | 1.000 | 32         | 44.7%    | 1.000 | 29           | 36.5%    | 1.000 |                                                                                  |          |      |              |       |        |                |        |       |             |        |        |  |
| FN0066 | 0                | 0.0%     |       | 0          | 0.0%     | 0.000 | 2          | 3.4%     | 0.643 | 1            | 2.7%     | 0.744 | AAL94279.1  Two component system histidine kinase                                |          |      |              |       |        |                |        |       |             |        |        |  |
|        | 0                | 0.0%     |       | 2          | 3.1%     | 0.995 | 3          | 3.4%     | 1.000 | 2            | 2.6%     | 0.935 |                                                                                  |          |      |              |       |        |                |        |       |             |        |        |  |
| FN0067 | 53               | 54.4%    | 1.000 | 46         | 50.9%    | 1.000 | 43         | 48.3%    | 1.000 | 51           | 53.8%    | 1.000 | AAL94280.1  Isoleucyl-tRNA synthetase                                            |          |      |              |       |        |                |        |       |             |        |        |  |
|        | 56               | 56.8%    | 1.000 | 52         | 53.7%    | 1.000 | 47         | 52.6%    | 1.000 | 53           | 45.8%    | 1.000 |                                                                                  |          |      |              |       |        |                |        |       |             |        |        |  |
| FN0069 | 24               | 60.3%    | 1.000 | 18         | 50.3%    | 1.000 | 25         | 60.3%    | 1.000 | 27           | 59.0%    | 1.000 | AAL94282.1  Glycyl-tRNA synthetase alpha chain                                   |          |      |              |       |        |                |        |       |             |        |        |  |
|        | 23               | 57.2%    | 1.000 | 29         | 60.3%    | 1.000 | 27         | 60.3%    | 1.000 | 25           | 51.0%    | 1.000 |                                                                                  |          |      |              |       |        |                |        |       |             |        |        |  |
| FN0070 | 55               | 50.7%    | 1.000 | 43         | 48.3%    | 1.000 | 54         | 53.5%    | 1.000 | 50           | 53.9%    | 1.000 | AAL94283.1  Glycyl-tRNA synthetase beta chain                                    |          |      |              |       |        |                |        |       |             |        |        |  |
|        | 55               | 50.1%    | 1.000 | 62         | 64.0%    | 1.000 | 54         | 62.4%    | 1.000 | 47           | 50.4%    | 1.000 |                                                                                  |          |      |              |       |        |                |        |       |             |        |        |  |
| FN0071 | 2                | 8.6%     | 0.995 | 0          | 0.0%     | 0.000 | 3          | 14.4%    | 0.997 | 2            | 7.5%     | 0.621 | AAL94284.1  GTP cyclohydrolase I                                                 |          |      |              |       |        |                |        |       |             |        |        |  |
|        | 3                | 14.4%    | 1.000 | 4          | 21.4%    | 1.000 | 2          | 10.7%    | 0.994 | 0            | 0.0%     | 0.000 |                                                                                  |          |      |              |       |        |                |        |       |             |        |        |  |
| FN0072 | 10               | 47.4%    | 1.000 | 7          | 23.4%    | 1.000 | 16         | 52.2%    | 1.000 | 11           | 39.8%    | 1.000 | AAL94285.1  2-amino-4-hydroxy-6-hydroxymethylidihydropteridine pyrophosphokinase |          |      |              |       |        |                |        |       |             |        |        |  |
|        | 9                | 37.6%    | 1.000 | 16         | 52.2%    | 1.000 | 16         | 52.2%    | 1.000 | 10           | 38.7%    | 1.000 |                                                                                  |          |      |              |       |        |                |        |       |             |        |        |  |
| FN0073 | 11               | 47.7%    | 1.000 | 5          | 29.6%    | 1.000 | 7          | 32.1%    | 1.000 | 7            | 30.0%    | 1.000 | AAL94286.1  Dihydropteroate synthase                                             |          |      |              |       |        |                |        |       |             |        |        |  |
|        | 10               | 45.8%    | 1.000 | 10         | 44.0%    | 1.000 | 9          | 41.5%    | 1.000 | 9            | 40.4%    | 1.000 |                                                                                  |          |      |              |       |        |                |        |       |             |        |        |  |

 Show detected proteins only  
 Show all proteins

 Filter by category:

 Proteins found:  
 1424

 Enter (or  
 paste) list  
 of ORFs

Find ORFs

Dot Plots Dot Plots

| ORF    | Fn Summary Table |          |       | FnPg vs Fn |          |       | FnSg vs Fn |          |       | FnPgSg vs Fn |          |       | FnPgSg vs FnPg                                              |          |      | FnSg vs FnPg |       |        | FnPgSg vs FnSg |        |       | Fn Coverage |        |        |  |
|--------|------------------|----------|-------|------------|----------|-------|------------|----------|-------|--------------|----------|-------|-------------------------------------------------------------|----------|------|--------------|-------|--------|----------------|--------|-------|-------------|--------|--------|--|
|        | Fn               |          |       | FnPg       |          |       | FnSg       |          |       | FnPgSg       |          |       | Description                                                 |          |      |              | Fn    |        | FnPg           |        | FnSg  |             | FnPgSg |        |  |
|        | n                | coverage | prob  | n          | coverage | prob  | n          | coverage | prob  | n            | coverage | prob  | n                                                           | coverage | prob | Description  | Rep I | Rep II | Rep I          | Rep II | Rep I | Rep II      | Rep I  | Rep II |  |
| FN0074 | 5                | 41.8%    | 1.000 | 2          | 34.4%    | 0.990 | 3          | 30.3%    | 0.998 | 5            | 40.2%    | 1.000 | AAL94287.1  Ethanolamine utilization protein eutS           |          |      |              |       |        |                |        |       |             |        |        |  |
|        | 5                | 41.8%    | 1.000 | 7          | 57.4%    | 1.000 | 4          | 30.3%    | 1.000 | 2            | 10.7%    | 0.992 |                                                             |          |      |              |       |        |                |        |       |             |        |        |  |
| FN0076 | 1                | 5.7%     | 0.395 | 0          | 0.0%     | 0.000 | 0          | 0.0%     | 0.000 | 0            | 0.0%     |       | AAL94289.1  Ethanolamine two-component response regulator   |          |      |              |       |        |                |        |       |             |        |        |  |
|        | 0                | 0.0%     | 0.000 | 3          | 37.5%    | 1.000 | 1          | 5.7%     | 0.985 | 0            | 0.0%     |       |                                                             |          |      |              |       |        |                |        |       |             |        |        |  |
| FN0077 | 1                | 3.9%     | 0.267 | 1          | 3.9%     | 0.265 | 1          | 3.9%     | 0.347 | 1            | 3.9%     | 0.395 | AAL94290.1  Ethanolamine two-component sensor kinase        |          |      |              |       |        |                |        |       |             |        |        |  |
|        | 4                | 10.2%    | 1.000 | 3          | 12.1%    | 0.850 | 6          | 17.7%    | 1.000 | 0            | 0.0%     | 0.000 |                                                             |          |      |              |       |        |                |        |       |             |        |        |  |
| FN0078 | 2                | 7.8%     | 0.981 | 11         | 25.8%    | 1.000 | 11         | 35.3%    | 1.000 | 4            | 11.6%    | 0.997 | AAL94291.1  Ethanolamine utilization protein eutA           |          |      |              |       |        |                |        |       |             |        |        |  |
|        | 3                | 11.6%    | 1.000 | 11         | 31.1%    | 1.000 | 9          | 26.7%    | 1.000 | 3            | 8.6%     | 0.895 |                                                             |          |      |              |       |        |                |        |       |             |        |        |  |
| FN0079 | 13               | 33.6%    | 1.000 | 11         | 34.5%    | 1.000 | 26         | 60.7%    | 1.000 | 15           | 44.4%    | 1.000 | AAL94292.1  Ethanolamine ammonia-lyase heavy chain          |          |      |              |       |        |                |        |       |             |        |        |  |
|        | 12               | 31.6%    | 1.000 | 29         | 55.4%    | 1.000 | 22         | 53.6%    | 1.000 | 8            | 28.8%    | 1.000 |                                                             |          |      |              |       |        |                |        |       |             |        |        |  |
| FN0080 | 20               | 45.1%    | 1.000 | 16         | 29.8%    | 1.000 | 20         | 43.4%    | 1.000 | 14           | 38.3%    | 1.000 | AAL94293.1  Ethanolamine ammonia-lyase light chain          |          |      |              |       |        |                |        |       |             |        |        |  |
|        | 16               | 36.6%    | 1.000 | 23         | 46.4%    | 1.000 | 18         | 40.3%    | 1.000 | 16           | 44.1%    | 1.000 |                                                             |          |      |              |       |        |                |        |       |             |        |        |  |
| FN0081 | 10               | 72.4%    | 1.000 | 5          | 41.9%    | 1.000 | 10         | 71.9%    | 1.000 | 7            | 52.5%    | 1.000 | AAL94294.1  Ethanolamine utilization protein eutL           |          |      |              |       |        |                |        |       |             |        |        |  |
|        | 10               | 72.4%    | 1.000 | 13         | 88.9%    | 1.000 | 14         | 85.7%    | 1.000 | 10           | 72.4%    | 1.000 |                                                             |          |      |              |       |        |                |        |       |             |        |        |  |
| FN0082 | 2                | 23.0%    | 0.999 | 2          | 23.0%    | 1.000 | 6          | 37.8%    | 1.000 | 6            | 50.0%    | 1.000 | AAL94295.1  Ethanolamine utilization protein eutM           |          |      |              |       |        |                |        |       |             |        |        |  |
|        | 4                | 32.4%    | 1.000 | 5          | 37.2%    | 1.000 | 6          | 40.5%    | 1.000 | 6            | 46.6%    | 1.000 |                                                             |          |      |              |       |        |                |        |       |             |        |        |  |
| FN0083 | 4                | 53.2%    | 1.000 | 4          | 39.4%    | 1.000 | 5          | 66.0%    | 1.000 | 7            | 75.5%    | 1.000 | AAL94296.1  Ethanolamine utilization protein eutM precursor |          |      |              |       |        |                |        |       |             |        |        |  |
|        | 3                | 53.2%    | 1.000 | 5          | 62.8%    | 1.000 | 4          | 53.2%    | 1.000 | 6            | 66.0%    | 1.000 |                                                             |          |      |              |       |        |                |        |       |             |        |        |  |
| FN0084 | 13               | 39.2%    | 1.000 | 10         | 31.7%    | 1.000 | 10         | 31.2%    | 1.000 | 12           | 30.6%    | 1.000 | AAL94297.1  Acetaldehyde dehydrogenase (acetylating)        |          |      |              |       |        |                |        |       |             |        |        |  |
|        | 11               | 34.8%    | 1.000 | 15         | 34.0%    | 1.000 | 17         | 55.2%    | 1.000 | 8            | 18.5%    | 1.000 |                                                             |          |      |              |       |        |                |        |       |             |        |        |  |
| FN0086 | 2                | 12.8%    | 0.696 | 4          | 28.2%    | 1.000 | 1          | 9.2%     | 0.845 | 0            | 0.0%     | 0.000 | AAL94299.1  Hypothetical protein                            |          |      |              |       |        |                |        |       |             |        |        |  |
|        | 1                | 4.1%     | 0.428 | 2          | 9.2%     | 0.922 | 2          | 13.3%    | 0.915 | 1            | 7.2%     | 0.679 |                                                             |          |      |              |       |        |                |        |       |             |        |        |  |
| FN0087 | 2                | 32.9%    | 0.999 | 3          | 51.2%    | 1.000 | 2          | 39.0%    | 0.994 | 2            | 39.0%    | 0.996 | AAL94300.1  Ethanolamine utilization protein eutN           |          |      |              |       |        |                |        |       |             |        |        |  |
|        | 2                | 28.0%    | 0.968 | 2          | 32.9%    | 0.990 | 3          | 57.3%    | 1.000 | 2            | 35.4%    | 0.688 |                                                             |          |      |              |       |        |                |        |       |             |        |        |  |
| FN0088 | 2                | 21.6%    | 0.999 | 2          | 10.8%    | 0.992 | 2          | 17.1%    | 0.786 | 0            | 0.0%     | 0.000 | AAL94301.1  Hypothetical protein                            |          |      |              |       |        |                |        |       |             |        |        |  |
|        | 3                | 21.6%    | 0.999 | 2          | 18.9%    | 0.989 | 3          | 25.2%    | 1.000 | 2            | 8.1%     | 0.889 |                                                             |          |      |              |       |        |                |        |       |             |        |        |  |
| FN0089 | 1                | 7.2%     | 0.363 | 1          | 7.2%     | 0.917 | 1          | 7.2%     | 0.665 | 3            | 20.8%    | 0.916 | AAL94302.1  Ethanolamine permease                           |          |      |              |       |        |                |        |       |             |        |        |  |
|        | 1                | 7.2%     | 0.329 | 1          | 7.2%     | 0.953 | 1          | 7.2%     | 0.985 | 2            | 13.3%    | 0.845 |                                                             |          |      |              |       |        |                |        |       |             |        |        |  |
| FN0090 | 1                | 8.7%     | 0.481 | 4          | 31.5%    | 1.000 | 3          | 28.2%    | 1.000 | 1            | 10.7%    | 0.983 | AAL94303.1  Ethanolamine utilization protein eutQ           |          |      |              |       |        |                |        |       |             |        |        |  |
|        | 2                | 19.5%    | 0.992 | 3          | 25.5%    | 1.000 | 3          | 24.8%    | 1.000 | 2            | 17.4%    | 0.643 |                                                             |          |      |              |       |        |                |        |       |             |        |        |  |
| FN0091 | 2                | 5.5%     | 0.990 | 3          | 10.1%    | 1.000 | 1          | 3.8%     | 0.826 | 2            | 5.7%     | 0.694 | AAL94304.1  Phosphoserine phosphatase                       |          |      |              |       |        |                |        |       |             |        |        |  |
|        | 2                | 6.3%     | 0.927 | 2          | 9.3%     | 0.991 | 2          | 6.6%     | 0.996 | 2            | 6.8%     | 0.988 |                                                             |          |      |              |       |        |                |        |       |             |        |        |  |

Show detected proteins only  
 Show all proteins  
 Filter by category:

Proteins found:  
 1424

Enter (or paste) list of ORFs

| ORF    | Fn Summary Table |          |       | FnPg vs Fn |          |       | FnSg vs Fn |          |       | FnPgSg vs Fn |          |       | FnPgSg vs FnPg                                               |          |      | FnSg vs FnPg |       |        | FnPgSg vs FnSg |        |       | Fn Coverage |        |        |  |
|--------|------------------|----------|-------|------------|----------|-------|------------|----------|-------|--------------|----------|-------|--------------------------------------------------------------|----------|------|--------------|-------|--------|----------------|--------|-------|-------------|--------|--------|--|
|        | Fn               |          |       | FnPg       |          |       | FnSg       |          |       | FnPgSg       |          |       | Description                                                  |          |      |              | Fn    |        | FnPg           |        | FnSg  |             | FnPgSg |        |  |
|        | n                | coverage | prob  | n          | coverage | prob  | n          | coverage | prob  | n            | coverage | prob  | n                                                            | coverage | prob | Description  | Rep I | Rep II | Rep I          | Rep II | Rep I | Rep II      | Rep I  | Rep II |  |
| FN0092 | 5                | 15.9%    | 1.000 | 6          | 22.8%    | 1.000 | 13         | 47.3%    | 1.000 | 3            | 15.6%    | 1.000 | AAL94305.1  NADPH-dependent butanol dehydrogenase            |          |      |              |       |        |                |        |       |             |        |        |  |
|        | 6                | 18.5%    | 1.000 | 17         | 53.5%    | 1.000 | 13         | 40.3%    | 1.000 | 7            | 27.2%    | 1.000 |                                                              |          |      |              |       |        |                |        |       |             |        |        |  |
| FN0093 | 10               | 77.7%    | 1.000 | 11         | 69.9%    | 1.000 | 5          | 58.3%    | 1.000 | 10           | 67.0%    | 1.000 | AAL94306.1  Thioredoxin                                      |          |      |              |       |        |                |        |       |             |        |        |  |
|        | 9                | 73.8%    | 1.000 | 10         | 80.6%    | 1.000 | 6          | 58.3%    | 1.000 | 9            | 73.8%    | 1.000 |                                                              |          |      |              |       |        |                |        |       |             |        |        |  |
| FN0100 | 9                | 41.9%    | 1.000 | 5          | 32.1%    | 1.000 | 5          | 24.2%    | 1.000 | 13           | 54.9%    | 1.000 | AAL94309.1  Flavodoxins/hemoproteins                         |          |      |              |       |        |                |        |       |             |        |        |  |
|        | 11               | 45.1%    | 1.000 | 8          | 35.3%    | 1.000 | 7          | 39.5%    | 1.000 | 8            | 38.6%    | 1.000 |                                                              |          |      |              |       |        |                |        |       |             |        |        |  |
| FN0102 | 7                | 11.9%    | 1.000 | 1          | 2.6%     | 0.932 | 1          | 2.6%     | 0.985 | 3            | 6.8%     | 0.994 | AAL94311.1  Ribonucleoside-diphosphate reductase alpha chain |          |      |              |       |        |                |        |       |             |        |        |  |
|        | 7                | 11.8%    | 1.000 | 1          | 1.3%     | 0.551 | 2          | 5.7%     | 0.997 | 6            | 11.3%    | 1.000 |                                                              |          |      |              |       |        |                |        |       |             |        |        |  |
| FN0103 | 4                | 15.5%    | 1.000 | 1          | 4.9%     | 0.685 | 0          | 0.0%     | 0.000 | 4            | 16.4%    | 1.000 | AAL94312.1  Ribonucleoside-diphosphate reductase beta chain  |          |      |              |       |        |                |        |       |             |        |        |  |
|        | 3                | 12.4%    | 0.996 | 0          | 0.0%     | 0.000 | 1          | 4.0%     | 0.306 | 1            | 2.6%     | 0.922 |                                                              |          |      |              |       |        |                |        |       |             |        |        |  |
| FN0106 | 12               | 65.0%    | 1.000 | 9          | 55.7%    | 1.000 | 11         | 65.0%    | 1.000 | 9            | 65.0%    | 1.000 | AAL94315.1  Hypothetical protein                             |          |      |              |       |        |                |        |       |             |        |        |  |
|        | 11               | 65.0%    | 1.000 | 11         | 65.0%    | 1.000 | 10         | 65.0%    | 1.000 | 10           | 65.0%    | 1.000 |                                                              |          |      |              |       |        |                |        |       |             |        |        |  |
| FN0108 | 4                | 24.9%    | 1.000 | 5          | 30.2%    | 1.000 | 9          | 42.9%    | 1.000 | 5            | 24.9%    | 1.000 | AAL94317.1  Microcin C7 self-immunity protein mccF           |          |      |              |       |        |                |        |       |             |        |        |  |
|        | 5                | 19.5%    | 1.000 | 9          | 45.3%    | 1.000 | 10         | 37.0%    | 1.000 | 2            | 14.2%    | 0.975 |                                                              |          |      |              |       |        |                |        |       |             |        |        |  |
| FN0110 | 38               | 60.4%    | 1.000 | 39         | 62.3%    | 1.000 | 40         | 74.3%    | 1.000 | 40           | 64.9%    | 1.000 | AAL94319.1  Seryl-tRNA synthetase                            |          |      |              |       |        |                |        |       |             |        |        |  |
|        | 39               | 60.1%    | 1.000 | 43         | 71.2%    | 1.000 | 42         | 73.1%    | 1.000 | 48           | 72.4%    | 1.000 |                                                              |          |      |              |       |        |                |        |       |             |        |        |  |
| FN0111 | 2                | 45.1%    | 0.999 | 1          | 19.8%    | 0.290 | 0          | 0.0%     |       | 0            | 0.0%     | 0.000 | AAL94320.1  unknown                                          |          |      |              |       |        |                |        |       |             |        |        |  |
|        | 2                | 45.1%    | 0.999 | 3          | 60.4%    | 0.997 | 0          | 0.0%     |       | 1            | 12.1%    | 0.514 |                                                              |          |      |              |       |        |                |        |       |             |        |        |  |
| FN0113 | 10               | 34.5%    | 1.000 | 10         | 29.1%    | 1.000 | 24         | 56.1%    | 1.000 | 8            | 28.8%    | 1.000 | AAL94322.1  Heat-inducible transcription repressor hrcA      |          |      |              |       |        |                |        |       |             |        |        |  |
|        | 10               | 30.2%    | 1.000 | 19         | 44.7%    | 1.000 | 23         | 50.4%    | 1.000 | 10           | 41.0%    | 1.000 |                                                              |          |      |              |       |        |                |        |       |             |        |        |  |
| FN0114 | 17               | 40.2%    | 1.000 | 15         | 51.8%    | 1.000 | 11         | 34.2%    | 1.000 | 12           | 34.7%    | 1.000 | AAL94323.1  GrpE protein                                     |          |      |              |       |        |                |        |       |             |        |        |  |
|        | 18               | 40.2%    | 1.000 | 13         | 39.2%    | 1.000 | 16         | 58.8%    | 1.000 | 13           | 34.7%    | 1.000 |                                                              |          |      |              |       |        |                |        |       |             |        |        |  |
| FN0116 | 51               | 61.3%    | 1.000 | 36         | 55.7%    | 1.000 | 54         | 69.7%    | 1.000 | 54           | 65.7%    | 1.000 | AAL94325.1  Chaperone protein dnaK                           |          |      |              |       |        |                |        |       |             |        |        |  |
|        | 55               | 64.3%    | 1.000 | 66         | 75.3%    | 1.000 | 64         | 72.0%    | 1.000 | 59           | 71.5%    | 1.000 |                                                              |          |      |              |       |        |                |        |       |             |        |        |  |
| FN0117 | 2                | 14.1%    | 0.987 | 1          | 6.5%     | 0.726 | 7          | 32.9%    | 1.000 | 0            | 0.0%     |       | AAL94326.1  O6-methylguanine-DNA methyltransferase           |          |      |              |       |        |                |        |       |             |        |        |  |
|        | 4                | 12.9%    | 1.000 | 5          | 25.9%    | 1.000 | 12         | 47.6%    | 1.000 | 0            | 0.0%     |       |                                                              |          |      |              |       |        |                |        |       |             |        |        |  |
| FN0118 | 18               | 39.5%    | 1.000 | 7          | 12.5%    | 1.000 | 10         | 18.4%    | 1.000 | 13           | 25.0%    | 1.000 | AAL94327.1  Chaperone protein dnaJ                           |          |      |              |       |        |                |        |       |             |        |        |  |
|        | 20               | 41.1%    | 1.000 | 16         | 37.8%    | 1.000 | 11         | 32.4%    | 1.000 | 15           | 28.8%    | 1.000 |                                                              |          |      |              |       |        |                |        |       |             |        |        |  |
| FN0119 | 4                | 26.2%    | 1.000 | 2          | 17.7%    | 0.997 | 5          | 41.5%    | 1.000 | 2            | 21.3%    | 0.999 | AAL94328.1  Flavodoxin                                       |          |      |              |       |        |                |        |       |             |        |        |  |
|        | 4                | 26.2%    | 1.000 | 9          | 64.6%    | 1.000 | 13         | 68.3%    | 1.000 | 2            | 15.2%    | 0.988 |                                                              |          |      |              |       |        |                |        |       |             |        |        |  |
| FN0123 | 5                | 9.9%     | 1.000 | 1          | 4.8%     | 0.970 | 3          | 11.5%    | 1.000 | 2            | 4.8%     | 0.823 | AAL94332.1  ATPase                                           |          |      |              |       |        |                |        |       |             |        |        |  |
|        | 5                | 12.3%    | 1.000 | 5          | 11.9%    | 1.000 | 5          | 13.7%    | 1.000 | 1            | 1.8%     | 0.343 |                                                              |          |      |              |       |        |                |        |       |             |        |        |  |

Show detected proteins only  
 Show all proteins  
 Filter by category:

Proteins found:  
1424

Enter (or paste) list of ORFs

Find ORFs

[Dot Plots](#) [Dot Plots](#)

| ORF    | Fn Summary Table |          |       | FnPg vs Fn |          |       | FnSg vs Fn |          |       | FnPgSg vs Fn |          |       | FnPgSg vs FnPg                                                 |          |      | FnSg vs FnPg |       |        | FnPgSg vs FnSg |        |       | Fn Coverage |        |        |  |
|--------|------------------|----------|-------|------------|----------|-------|------------|----------|-------|--------------|----------|-------|----------------------------------------------------------------|----------|------|--------------|-------|--------|----------------|--------|-------|-------------|--------|--------|--|
|        | Fn               |          |       | FnPg       |          |       | FnSg       |          |       | FnPgSg       |          |       | Description                                                    |          |      |              | Fn    |        | FnPg           |        | FnSg  |             | FnPgSg |        |  |
|        | n                | coverage | prob  | n          | coverage | prob  | n          | coverage | prob  | n            | coverage | prob  | n                                                              | coverage | prob | Description  | Rep I | Rep II | Rep I          | Rep II | Rep I | Rep II      | Rep I  | Rep II |  |
| FN0127 | 1                | 3.2%     | 0.977 | 3          | 19.7%    | 0.999 | 4          | 23.6%    | 1.000 | 2            | 8.8%     | 0.994 | AAL94333.1   Fe-S oxidoreductase                               |          |      |              |       |        |                |        |       |             |        |        |  |
|        | 1                | 3.2%     | 0.964 | 1          | 4.9%     | 0.983 | 4          | 21.8%    | 1.000 | 2            | 6.7%     | 0.991 |                                                                |          |      |              |       |        |                |        |       |             |        |        |  |
| FN0128 | 8                | 31.8%    | 1.000 | 8          | 30.3%    | 1.000 | 3          | 16.9%    | 0.999 | 6            | 22.6%    | 1.000 | AAL94334.1   Spermidine/putrescine-binding protein             |          |      |              |       |        |                |        |       |             |        |        |  |
|        | 7                | 28.0%    | 1.000 | 7          | 29.6%    | 1.000 | 11         | 36.6%    | 1.000 | 5            | 19.1%    | 1.000 |                                                                |          |      |              |       |        |                |        |       |             |        |        |  |
| FN0129 | 3                | 21.6%    | 0.990 | 1          | 10.8%    | 0.303 | 1          | 4.8%     | 0.465 | 1            | 3.9%     | 0.471 | AAL94335.1   Urease accessory protein ureG                     |          |      |              |       |        |                |        |       |             |        |        |  |
|        | 2                | 11.3%    | 0.896 | 0          | 0.0%     | 0.000 | 2          | 12.6%    | 0.912 | 2            | 11.3%    | 0.998 |                                                                |          |      |              |       |        |                |        |       |             |        |        |  |
| FN0130 | 5                | 26.5%    | 1.000 | 1          | 6.0%     | 0.981 | 4          | 22.8%    | 1.000 | 4            | 16.4%    | 1.000 | AAL94336.1   ABC transporter ATP-binding protein               |          |      |              |       |        |                |        |       |             |        |        |  |
|        | 2                | 12.3%    | 1.000 | 3          | 19.0%    | 1.000 | 11         | 39.6%    | 1.000 | 5            | 26.5%    | 1.000 |                                                                |          |      |              |       |        |                |        |       |             |        |        |  |
| FN0132 | 0                | 0.0%     | 0.000 | 3          | 2.0%     | 0.000 | 0          | 0.0%     | 0.000 | 12           | 6.9%     | 0.000 | AAL93916.1   Hemolysin                                         |          |      |              |       |        |                |        |       |             |        |        |  |
|        | 5                | 2.5%     | 0.000 | 8          | 4.8%     | 0.258 | 6          | 2.8%     | 0.000 | 4            | 2.0%     | 0.000 |                                                                |          |      |              |       |        |                |        |       |             |        |        |  |
| FN0147 | 12               | 37.7%    | 1.000 | 7          | 25.0%    | 1.000 | 11         | 43.4%    | 1.000 | 7            | 32.2%    | 1.000 | AAL94353.1   PLSX protein                                      |          |      |              |       |        |                |        |       |             |        |        |  |
|        | 12               | 39.8%    | 1.000 | 8          | 34.3%    | 1.000 | 9          | 34.3%    | 1.000 | 7            | 31.9%    | 1.000 |                                                                |          |      |              |       |        |                |        |       |             |        |        |  |
| FN0148 | 17               | 57.9%    | 1.000 | 13         | 54.0%    | 1.000 | 18         | 65.5%    | 1.000 | 17           | 61.6%    | 1.000 | AAL94354.1   3-oxoacyl-[acyl-carrier-protein] synthase III     |          |      |              |       |        |                |        |       |             |        |        |  |
|        | 17               | 54.9%    | 1.000 | 17         | 58.5%    | 1.000 | 15         | 59.5%    | 1.000 | 16           | 59.5%    | 1.000 |                                                                |          |      |              |       |        |                |        |       |             |        |        |  |
| FN0149 | 23               | 65.9%    | 1.000 | 18         | 56.2%    | 1.000 | 18         | 64.9%    | 1.000 | 27           | 74.6%    | 1.000 | AAL94355.1   Malonyl-CoA-[acyl-carrier-protein] transacylase   |          |      |              |       |        |                |        |       |             |        |        |  |
|        | 19               | 65.2%    | 1.000 | 21         | 70.2%    | 1.000 | 15         | 60.9%    | 1.000 | 26           | 74.6%    | 1.000 |                                                                |          |      |              |       |        |                |        |       |             |        |        |  |
| FN0150 | 6                | 21.3%    | 1.000 | 4          | 21.3%    | 1.000 | 3          | 21.3%    | 1.000 | 6            | 21.3%    | 1.000 | AAL94356.1   Acyl carrier protein                              |          |      |              |       |        |                |        |       |             |        |        |  |
|        | 4                | 21.3%    | 1.000 | 3          | 18.7%    | 1.000 | 3          | 18.7%    | 1.000 | 6            | 21.3%    | 1.000 |                                                                |          |      |              |       |        |                |        |       |             |        |        |  |
| FN0151 | 27               | 72.6%    | 1.000 | 21         | 65.1%    | 1.000 | 28         | 80.4%    | 1.000 | 29           | 79.4%    | 1.000 | AAL94357.1   3-oxoacyl-[acyl-carrier-protein] synthase         |          |      |              |       |        |                |        |       |             |        |        |  |
|        | 27               | 72.6%    | 1.000 | 34         | 80.4%    | 1.000 | 26         | 78.0%    | 1.000 | 29           | 68.3%    | 1.000 |                                                                |          |      |              |       |        |                |        |       |             |        |        |  |
| FN0152 | 3                | 17.5%    | 0.988 | 2          | 10.3%    | 0.851 | 2          | 10.3%    | 0.999 | 2            | 6.8%     | 0.998 | AAL94358.1   Ribonuclease III                                  |          |      |              |       |        |                |        |       |             |        |        |  |
|        | 3                | 10.3%    | 0.999 | 4          | 17.1%    | 1.000 | 3          | 13.7%    | 1.000 | 4            | 14.1%    | 1.000 |                                                                |          |      |              |       |        |                |        |       |             |        |        |  |
| FN0153 | 0                | 0.0%     | 0.000 | 0          | 0.0%     | 0.000 | 1          | 2.3%     | 0.832 | 0            | 0.0%     |       | AAL94359.1   Oxygen-independent coproporphyrinogen III oxidase |          |      |              |       |        |                |        |       |             |        |        |  |
|        | 1                | 2.6%     | 0.325 | 1          | 2.3%     | 0.852 | 4          | 23.3%    | 1.000 | 0            | 0.0%     |       |                                                                |          |      |              |       |        |                |        |       |             |        |        |  |
| FN0154 | 3                | 9.6%     | 0.768 | 1          | 3.7%     | 0.452 | 2          | 5.2%     | 0.760 | 2            | 3.5%     | 0.669 | AAL94360.1   Ribonuclease G                                    |          |      |              |       |        |                |        |       |             |        |        |  |
|        | 2                | 7.2%     | 0.832 | 1          | 3.7%     | 0.983 | 2          | 5.7%     | 0.956 | 3            | 7.6%     | 0.738 |                                                                |          |      |              |       |        |                |        |       |             |        |        |  |
| FN0155 | 6                | 16.5%    | 1.000 | 1          | 4.8%     | 0.941 | 0          | 0.0%     | 0.000 | 8            | 21.8%    | 1.000 | AAL94361.1   Hypothetical protein                              |          |      |              |       |        |                |        |       |             |        |        |  |
|        | 1                | 2.4%     | 0.760 | 0          | 0.0%     | 0.000 | 5          | 13.6%    | 1.000 | 3            | 7.5%     | 0.998 |                                                                |          |      |              |       |        |                |        |       |             |        |        |  |
| FN0156 | 5                | 36.2%    | 1.000 | 4          | 33.1%    | 1.000 | 3          | 20.2%    | 0.997 | 7            | 48.5%    | 1.000 | AAL94362.1   Phosphopantetheine adenylyltransferase            |          |      |              |       |        |                |        |       |             |        |        |  |
|        | 5                | 29.4%    | 1.000 | 7          | 41.1%    | 1.000 | 6          | 31.9%    | 1.000 | 5            | 33.1%    | 1.000 |                                                                |          |      |              |       |        |                |        |       |             |        |        |  |
| FN0157 | 5                | 11.7%    | 1.000 | 2          | 5.3%     | 0.975 | 5          | 10.0%    | 1.000 | 2            | 8.4%     | 0.830 | AAL94363.1   DNA repair protein RadA                           |          |      |              |       |        |                |        |       |             |        |        |  |
|        | 4                | 8.6%     | 1.000 | 1          | 1.8%     | 0.786 | 5          | 11.9%    | 1.000 | 1            | 1.8%     | 0.489 |                                                                |          |      |              |       |        |                |        |       |             |        |        |  |

Show detected proteins only  
 Show all proteins  
 Filter by category:

Proteins found:  
1424

Enter (or paste) list of ORFs

Find ORFs

[Dot Plots](#) [Dot Plots](#)



| ORF    | Fn Summary Table |          |       | FnPg vs Fn |          |       | FnSg vs Fn |          |       | FnPgSg vs Fn |          |       | FnPgSg vs FnPg                                         |          |      | FnSg vs FnPg |       |        | FnPgSg vs FnSg |        |       | Fn Coverage |        |        |  |
|--------|------------------|----------|-------|------------|----------|-------|------------|----------|-------|--------------|----------|-------|--------------------------------------------------------|----------|------|--------------|-------|--------|----------------|--------|-------|-------------|--------|--------|--|
|        | Fn               |          |       | FnPg       |          |       | FnSg       |          |       | FnPgSg       |          |       | Description                                            |          |      |              | Fn    |        | FnPg           |        | FnSg  |             | FnPgSg |        |  |
|        | n                | coverage | prob  | n          | coverage | prob  | n          | coverage | prob  | n            | coverage | prob  | n                                                      | coverage | prob | Description  | Rep I | Rep II | Rep I          | Rep II | Rep I | Rep II      | Rep I  | Rep II |  |
| FN0158 | 9                | 35.0%    | 1.000 | 6          | 20.3%    | 1.000 | 11         | 40.1%    | 1.000 | 8            | 29.8%    | 1.000 | AAL94364.1  DNA-binding protein                        |          |      |              |       |        |                |        |       |             |        |        |  |
|        | 12               | 42.4%    | 1.000 | 7          | 26.9%    | 1.000 | 12         | 42.1%    | 1.000 | 7            | 26.1%    | 1.000 |                                                        |          |      |              |       |        |                |        |       |             |        |        |  |
| FN0161 | 1                | 3.4%     | 0.969 | 0          | 0.0%     | 0.000 | 1          | 4.3%     | 0.305 | 1            | 2.3%     | 0.535 | AAL94367.1  RNA-directed DNA polymerase                |          |      |              |       |        |                |        |       |             |        |        |  |
|        | 0                | 0.0%     | 0.000 | 0          | 0.0%     | 0.000 | 3          | 4.6%     | 0.863 | 1            | 3.4%     | 0.485 |                                                        |          |      |              |       |        |                |        |       |             |        |        |  |
| FN0164 | 22               | 67.4%    | 1.000 | 19         | 63.2%    | 1.000 | 24         | 66.3%    | 1.000 | 22           | 61.1%    | 1.000 | AAL94370.1  Anhydro-N-acetylmuramyl-tripeptide amidase |          |      |              |       |        |                |        |       |             |        |        |  |
|        | 24               | 67.4%    | 1.000 | 23         | 66.0%    | 1.000 | 22         | 66.0%    | 1.000 | 21           | 62.8%    | 1.000 |                                                        |          |      |              |       |        |                |        |       |             |        |        |  |
| FN0170 | 17               | 41.8%    | 1.000 | 14         | 38.2%    | 1.000 | 36         | 80.5%    | 1.000 | 27           | 61.6%    | 1.000 | AAL94376.1  GTP-binding protein                        |          |      |              |       |        |                |        |       |             |        |        |  |
|        | 22               | 49.8%    | 1.000 | 32         | 65.0%    | 1.000 | 28         | 56.6%    | 1.000 | 22           | 52.5%    | 1.000 |                                                        |          |      |              |       |        |                |        |       |             |        |        |  |
| FN0173 | 11               | 27.3%    | 1.000 | 5          | 15.8%    | 1.000 | 19         | 32.5%    | 1.000 | 13           | 28.9%    | 1.000 | AAL94379.1  Hypothetical protein                       |          |      |              |       |        |                |        |       |             |        |        |  |
|        | 11               | 18.9%    | 1.000 | 16         | 36.4%    | 1.000 | 12         | 23.6%    | 1.000 | 9            | 18.9%    | 1.000 |                                                        |          |      |              |       |        |                |        |       |             |        |        |  |
| FN0174 | 11               | 41.5%    | 1.000 | 8          | 35.2%    | 1.000 | 12         | 45.3%    | 1.000 | 15           | 44.0%    | 1.000 | AAL94380.1  Enoyl-[acyl-carrier-protein] reductase     |          |      |              |       |        |                |        |       |             |        |        |  |
|        | 14               | 48.7%    | 1.000 | 15         | 50.6%    | 1.000 | 14         | 50.9%    | 1.000 | 16           | 44.0%    | 1.000 |                                                        |          |      |              |       |        |                |        |       |             |        |        |  |
| FN0175 | 5                | 25.9%    | 1.000 | 5          | 25.5%    | 1.000 | 6          | 42.1%    | 1.000 | 2            | 16.7%    | 1.000 | AAL94381.1  Cell division inhibitor MinC               |          |      |              |       |        |                |        |       |             |        |        |  |
|        | 4                | 25.9%    | 1.000 | 6          | 38.4%    | 1.000 | 9          | 51.4%    | 1.000 | 3            | 16.7%    | 1.000 |                                                        |          |      |              |       |        |                |        |       |             |        |        |  |
| FN0176 | 19               | 75.4%    | 1.000 | 14         | 44.7%    | 1.000 | 20         | 61.4%    | 1.000 | 19           | 69.7%    | 1.000 | AAL94382.1  Cell division inhibitor MinD               |          |      |              |       |        |                |        |       |             |        |        |  |
|        | 20               | 68.2%    | 1.000 | 22         | 72.7%    | 1.000 | 21         | 77.7%    | 1.000 | 19           | 63.6%    | 1.000 |                                                        |          |      |              |       |        |                |        |       |             |        |        |  |
| FN0177 | 5                | 49.5%    | 1.000 | 3          | 27.3%    | 1.000 | 1          | 11.1%    | 0.985 | 6            | 49.5%    | 1.000 | AAL94383.1  Cell division inhibitor MinE               |          |      |              |       |        |                |        |       |             |        |        |  |
|        | 4                | 42.4%    | 1.000 | 0          | 0.0%     | 0.000 | 1          | 17.2%    | 0.433 | 5            | 49.5%    | 1.000 |                                                        |          |      |              |       |        |                |        |       |             |        |        |  |
| FN0178 | 12               | 48.8%    | 1.000 | 7          | 35.9%    | 1.000 | 8          | 36.8%    | 1.000 | 12           | 39.6%    | 1.000 | AAL94384.1  UNC-44 ankyrins                            |          |      |              |       |        |                |        |       |             |        |        |  |
|        | 11               | 45.1%    | 1.000 | 9          | 35.3%    | 1.000 | 7          | 32.2%    | 1.000 | 11           | 39.9%    | 1.000 |                                                        |          |      |              |       |        |                |        |       |             |        |        |  |
| FN0179 | 9                | 27.2%    | 1.000 | 12         | 37.0%    | 1.000 | 8          | 29.1%    | 1.000 | 10           | 30.2%    | 1.000 | AAL94385.1  Ankyrin repeat proteins                    |          |      |              |       |        |                |        |       |             |        |        |  |
|        | 8                | 22.5%    | 1.000 | 10         | 30.2%    | 1.000 | 12         | 37.5%    | 1.000 | 6            | 19.9%    | 1.000 |                                                        |          |      |              |       |        |                |        |       |             |        |        |  |
| FN0180 | 2                | 19.0%    | 0.998 | 2          | 27.8%    | 0.999 | 3          | 40.5%    | 0.994 | 3            | 32.9%    | 1.000 | AAL94386.1  Tetratricopeptide repeat family protein    |          |      |              |       |        |                |        |       |             |        |        |  |
|        | 2                | 19.0%    | 0.981 | 2          | 33.5%    | 0.988 | 4          | 45.6%    | 1.000 | 2            | 12.0%    | 0.999 |                                                        |          |      |              |       |        |                |        |       |             |        |        |  |
| FN0181 | 5                | 51.8%    | 1.000 | 3          | 40.4%    | 1.000 | 6          | 45.6%    | 1.000 | 4            | 31.6%    | 1.000 | AAL94387.1  Hypothetical protein                       |          |      |              |       |        |                |        |       |             |        |        |  |
|        | 5                | 51.8%    | 1.000 | 7          | 57.0%    | 1.000 | 7          | 57.0%    | 1.000 | 5            | 31.6%    | 1.000 |                                                        |          |      |              |       |        |                |        |       |             |        |        |  |
| FN0182 | 11               | 26.4%    | 1.000 | 10         | 37.5%    | 1.000 | 30         | 57.0%    | 1.000 | 15           | 48.7%    | 1.000 | AAL94388.1  Sarcosine oxidase alpha subunit            |          |      |              |       |        |                |        |       |             |        |        |  |
|        | 14               | 43.0%    | 1.000 | 33         | 58.2%    | 1.000 | 30         | 58.9%    | 1.000 | 12           | 36.3%    | 1.000 |                                                        |          |      |              |       |        |                |        |       |             |        |        |  |
| FN0183 | 28               | 50.4%    | 1.000 | 12         | 30.3%    | 1.000 | 40         | 67.3%    | 1.000 | 26           | 49.8%    | 1.000 | AAL94389.1  Glycerol-3-phosphate dehydrogenase         |          |      |              |       |        |                |        |       |             |        |        |  |
|        | 27               | 47.6%    | 1.000 | 42         | 66.3%    | 1.000 | 38         | 63.5%    | 1.000 | 26           | 55.0%    | 1.000 |                                                        |          |      |              |       |        |                |        |       |             |        |        |  |
| FN0185 | 6                | 17.8%    | 1.000 | 3          | 9.2%     | 1.000 | 5          | 11.2%    | 1.000 | 7            | 20.8%    | 1.000 | AAL94391.1  Hypothetical protein                       |          |      |              |       |        |                |        |       |             |        |        |  |
|        | 10               | 24.0%    | 1.000 | 9          | 24.0%    | 1.000 | 8          | 26.8%    | 1.000 | 6            | 16.2%    | 1.000 |                                                        |          |      |              |       |        |                |        |       |             |        |        |  |

Show detected proteins only  
 Show all proteins  
 Filter by category:

Proteins found:  
 1424

Enter (or paste) list of ORFs

| ORF    | Fn Summary Table |          |       | FnPg vs Fn |          |       | FnSg vs Fn |          |       | FnPgSg vs Fn |          |       | FnPgSg vs FnPg                                                              |          |      | FnSg vs FnPg |       |        | FnPgSg vs FnSg |        |       | Fn Coverage |        |        |  |
|--------|------------------|----------|-------|------------|----------|-------|------------|----------|-------|--------------|----------|-------|-----------------------------------------------------------------------------|----------|------|--------------|-------|--------|----------------|--------|-------|-------------|--------|--------|--|
|        | Fn               |          |       | FnPg       |          |       | FnSg       |          |       | FnPgSg       |          |       | Description                                                                 |          |      |              | Fn    |        | FnPg           |        | FnSg  |             | FnPgSg |        |  |
|        | n                | coverage | prob  | n          | coverage | prob  | n          | coverage | prob  | n            | coverage | prob  | n                                                                           | coverage | prob | Description  | Rep I | Rep II | Rep I          | Rep II | Rep I | Rep II      | Rep I  | Rep II |  |
| FN0188 | 3                | 13.4%    | 1.000 | 2          | 10.7%    | 0.486 | 2          | 7.4%     | 0.979 | 0            | 0.0%     | 0.000 | AAL94394.1  Peptide methionine sulfoxide reductase                          |          |      |              |       |        |                |        |       |             |        |        |  |
|        | 2                | 6.4%     | 0.987 | 0          | 0.0%     | 0.000 | 0          | 0.0%     | 0.000 | 1            | 4.0%     | 0.953 |                                                                             |          |      |              |       |        |                |        |       |             |        |        |  |
| FN0189 | 2                | 8.4%     | 0.963 | 1          | 6.9%     | 0.984 | 8          | 38.7%    | 1.000 | 4            | 13.0%    | 1.000 | AAL94395.1  Two-component response regulator yesN                           |          |      |              |       |        |                |        |       |             |        |        |  |
|        | 1                | 5.0%     | 0.293 | 7          | 34.9%    | 1.000 | 5          | 16.9%    | 1.000 | 3            | 7.7%     | 0.998 |                                                                             |          |      |              |       |        |                |        |       |             |        |        |  |
| FN0190 | 2                | 5.6%     | 0.998 | 3          | 7.6%     | 1.000 | 4          | 10.7%    | 1.000 | 1            | 2.9%     | 0.418 | AAL94396.1  Two-component sensor kinase yesM                                |          |      |              |       |        |                |        |       |             |        |        |  |
|        | 6                | 13.4%    | 1.000 | 3          | 7.1%     | 1.000 | 3          | 11.2%    | 1.000 | 2            | 5.6%     | 0.991 |                                                                             |          |      |              |       |        |                |        |       |             |        |        |  |
| FN0191 | 4                | 11.1%    | 1.000 | 4          | 12.4%    | 1.000 | 8          | 19.1%    | 1.000 | 5            | 13.0%    | 1.000 | AAL94397.1  helix-turn-helix DNA-binding protein                            |          |      |              |       |        |                |        |       |             |        |        |  |
|        | 4                | 10.9%    | 1.000 | 9          | 23.1%    | 1.000 | 11         | 32.7%    | 1.000 | 5            | 13.2%    | 1.000 |                                                                             |          |      |              |       |        |                |        |       |             |        |        |  |
| FN0192 | 20               | 35.9%    | 1.000 | 2          | 4.3%     | 0.996 | 7          | 20.4%    | 1.000 | 14           | 28.2%    | 1.000 | AAL94398.1  Dipeptide-binding protein                                       |          |      |              |       |        |                |        |       |             |        |        |  |
|        | 22               | 40.2%    | 1.000 | 7          | 13.6%    | 1.000 | 14         | 40.0%    | 1.000 | 13           | 27.2%    | 1.000 |                                                                             |          |      |              |       |        |                |        |       |             |        |        |  |
| FN0197 | 2                | 7.1%     | 0.998 | 1          | 2.6%     | 0.943 | 0          | 0.0%     | 0.000 | 2            | 7.1%     | 0.988 | AAL94403.1  Methyltransferase                                               |          |      |              |       |        |                |        |       |             |        |        |  |
|        | 3                | 7.1%     | 0.996 | 1          | 4.5%     | 0.928 | 3          | 7.1%     | 0.998 | 2            | 5.6%     | 0.985 |                                                                             |          |      |              |       |        |                |        |       |             |        |        |  |
| FN0198 | 3                | 7.0%     | 0.998 | 2          | 5.0%     | 0.850 | 1          | 2.9%     | 0.377 | 5            | 8.0%     | 1.000 | AAL94404.1  Transcriptional regulatory protein                              |          |      |              |       |        |                |        |       |             |        |        |  |
|        | 3                | 5.3%     | 0.999 | 2          | 5.3%     | 0.606 | 2          | 5.2%     | 0.990 | 4            | 6.7%     | 1.000 |                                                                             |          |      |              |       |        |                |        |       |             |        |        |  |
| FN0199 | 5                | 47.0%    | 1.000 | 3          | 38.0%    | 1.000 | 3          | 38.0%    | 1.000 | 7            | 54.0%    | 1.000 | AAL94405.1  Hypothetical protein                                            |          |      |              |       |        |                |        |       |             |        |        |  |
|        | 4                | 27.0%    | 1.000 | 5          | 51.0%    | 1.000 | 6          | 51.0%    | 1.000 | 4            | 38.0%    | 1.000 |                                                                             |          |      |              |       |        |                |        |       |             |        |        |  |
| FN0200 | 14               | 58.2%    | 1.000 | 11         | 59.7%    | 1.000 | 7          | 50.7%    | 1.000 | 10           | 47.8%    | 1.000 | AAL94406.1  Biotin carboxyl carrier protein of glutaconyl-CoA decarboxylase |          |      |              |       |        |                |        |       |             |        |        |  |
|        | 11               | 58.2%    | 1.000 | 9          | 56.7%    | 1.000 | 10         | 56.7%    | 1.000 | 9            | 54.5%    | 1.000 |                                                                             |          |      |              |       |        |                |        |       |             |        |        |  |
| FN0202 | 36               | 73.5%    | 1.000 | 28         | 68.8%    | 1.000 | 29         | 81.3%    | 1.000 | 34           | 73.8%    | 1.000 | AAL94408.1  Glutaconate CoA-transferase subunit A                           |          |      |              |       |        |                |        |       |             |        |        |  |
|        | 34               | 75.4%    | 1.000 | 30         | 72.0%    | 1.000 | 25         | 67.0%    | 1.000 | 33           | 65.1%    | 1.000 |                                                                             |          |      |              |       |        |                |        |       |             |        |        |  |
| FN0203 | 34               | 86.5%    | 1.000 | 31         | 77.5%    | 1.000 | 21         | 80.9%    | 1.000 | 30           | 84.6%    | 1.000 | AAL94409.1  Glutaconate CoA-transferase subunit B                           |          |      |              |       |        |                |        |       |             |        |        |  |
|        | 33               | 76.4%    | 1.000 | 32         | 89.9%    | 1.000 | 25         | 82.4%    | 1.000 | 33           | 86.5%    | 1.000 |                                                                             |          |      |              |       |        |                |        |       |             |        |        |  |
| FN0204 | 80               | 80.3%    | 1.000 | 55         | 72.4%    | 1.000 | 57         | 78.4%    | 1.000 | 66           | 78.3%    | 1.000 | AAL94410.1  Glutaconyl-CoA decarboxylase A subunit                          |          |      |              |       |        |                |        |       |             |        |        |  |
|        | 76               | 75.3%    | 1.000 | 66         | 83.6%    | 1.000 | 59         | 80.3%    | 1.000 | 66           | 78.3%    | 1.000 |                                                                             |          |      |              |       |        |                |        |       |             |        |        |  |
| FN0206 | 13               | 51.3%    | 1.000 | 8          | 41.9%    | 1.000 | 9          | 33.6%    | 1.000 | 10           | 41.5%    | 1.000 | AAL94412.1  Activator of (R)-2-hydroxyglutaryl-CoA dehydratase              |          |      |              |       |        |                |        |       |             |        |        |  |
|        | 14               | 54.7%    | 1.000 | 12         | 55.8%    | 1.000 | 11         | 46.8%    | 1.000 | 7            | 41.5%    | 1.000 |                                                                             |          |      |              |       |        |                |        |       |             |        |        |  |
| FN0207 | 44               | 77.8%    | 1.000 | 34         | 65.8%    | 1.000 | 43         | 78.3%    | 1.000 | 51           | 80.5%    | 1.000 | AAL94413.1  (R)-2-hydroxyglutaryl-CoA dehydratase alpha-subunit             |          |      |              |       |        |                |        |       |             |        |        |  |
|        | 42               | 80.8%    | 1.000 | 46         | 78.7%    | 1.000 | 39         | 74.9%    | 1.000 | 50           | 81.7%    | 1.000 |                                                                             |          |      |              |       |        |                |        |       |             |        |        |  |
| FN0208 | 26               | 53.1%    | 1.000 | 29         | 63.4%    | 1.000 | 27         | 62.0%    | 1.000 | 28           | 56.8%    | 1.000 | AAL94414.1  (R)-2-hydroxyglutaryl-CoA dehydratase beta-subunit              |          |      |              |       |        |                |        |       |             |        |        |  |
|        | 25               | 55.0%    | 1.000 | 30         | 57.6%    | 1.000 | 26         | 55.0%    | 1.000 | 31           | 58.1%    | 1.000 |                                                                             |          |      |              |       |        |                |        |       |             |        |        |  |
| FN0209 | 22               | 79.7%    | 1.000 | 21         | 68.0%    | 1.000 | 21         | 80.7%    | 1.000 | 22           | 80.2%    | 1.000 | AAL94415.1  Hypothetical cytosolic protein                                  |          |      |              |       |        |                |        |       |             |        |        |  |
|        | 23               | 79.7%    | 1.000 | 25         | 81.2%    | 1.000 | 23         | 80.7%    | 1.000 | 24           | 80.2%    | 1.000 |                                                                             |          |      |              |       |        |                |        |       |             |        |        |  |

Show detected proteins only  
 Show all proteins  
 Filter by category:

Proteins found:  
1424

Enter (or paste) list of ORFs

Find ORFs

[Dot Plots](#) [Dot Plots](#)



| ORF    | Fn Summary Table |          |       | FnPg vs Fn |          |       | FnSg vs Fn |          |       | FnPgSg vs Fn |          |       | FnPgSg vs FnPg                                             |          |      | FnSg vs FnPg |       |        | FnPgSg vs FnSg |        |       | Fn Coverage |        |        |  |
|--------|------------------|----------|-------|------------|----------|-------|------------|----------|-------|--------------|----------|-------|------------------------------------------------------------|----------|------|--------------|-------|--------|----------------|--------|-------|-------------|--------|--------|--|
|        | Fn               |          |       | FnPg       |          |       | FnSg       |          |       | FnPgSg       |          |       | Description                                                |          |      |              | Fn    |        | FnPg           |        | FnSg  |             | FnPgSg |        |  |
|        | n                | coverage | prob  | n          | coverage | prob  | n          | coverage | prob  | n            | coverage | prob  | n                                                          | coverage | prob | Description  | Rep I | Rep II | Rep I          | Rep II | Rep I | Rep II      | Rep I  | Rep II |  |
| FN0212 | 10               | 42.2%    | 1.000 | 7          | 42.2%    | 1.000 | 5          | 22.2%    | 1.000 | 8            | 41.1%    | 1.000 | AAL94418.1   Hypothetical protein                          |          |      |              |       |        |                |        |       |             |        |        |  |
|        | 6                | 30.6%    | 1.000 | 5          | 27.2%    | 1.000 | 6          | 27.2%    | 1.000 | 7            | 35.6%    | 1.000 |                                                            |          |      |              |       |        |                |        |       |             |        |        |  |
| FN0214 | 1                | 15.8%    | 0.436 | 3          | 35.8%    | 0.960 | 0          | 0.0%     | 0.000 | 1            | 15.8%    | 0.974 | AAL94420.1   Crossover junction endodeoxyribonuclease ruvC |          |      |              |       |        |                |        |       |             |        |        |  |
|        | 0                | 0.0%     | 0.000 | 0          | 0.0%     | 0.000 | 1          | 4.7%     | 0.287 | 0            | 0.0%     | 0.000 |                                                            |          |      |              |       |        |                |        |       |             |        |        |  |
| FN0218 | 15               | 46.7%    | 1.000 | 13         | 49.5%    | 1.000 | 12         | 45.3%    | 1.000 | 13           | 41.9%    | 1.000 | AAL94424.1   Anthranilate synthase component II            |          |      |              |       |        |                |        |       |             |        |        |  |
|        | 14               | 46.7%    | 1.000 | 19         | 54.3%    | 1.000 | 15         | 58.8%    | 1.000 | 11           | 41.9%    | 1.000 |                                                            |          |      |              |       |        |                |        |       |             |        |        |  |
| FN0219 | 3                | 13.3%    | 0.987 | 2          | 5.4%     | 0.736 | 1          | 5.4%     | 0.981 | 2            | 8.3%     | 0.999 | AAL94425.1   Autolysin response regulator                  |          |      |              |       |        |                |        |       |             |        |        |  |
|        | 2                | 9.6%     | 0.985 | 3          | 15.8%    | 0.998 | 6          | 23.3%    | 1.000 | 3            | 12.5%    | 1.000 |                                                            |          |      |              |       |        |                |        |       |             |        |        |  |
| FN0221 | 6                | 12.2%    | 1.000 | 9          | 25.9%    | 1.000 | 6          | 13.5%    | 1.000 | 8            | 17.3%    | 1.000 | AAL94427.1   Carbon starvation protein A                   |          |      |              |       |        |                |        |       |             |        |        |  |
|        | 7                | 12.2%    | 1.000 | 9          | 16.9%    | 1.000 | 6          | 15.0%    | 1.000 | 7            | 15.8%    | 1.000 |                                                            |          |      |              |       |        |                |        |       |             |        |        |  |
| FN0224 | 7                | 10.9%    | 1.000 | 9          | 17.3%    | 1.000 | 4          | 11.6%    | 1.000 | 7            | 11.3%    | 1.000 | AAL94430.1   Excinuclease ABC subunit B                    |          |      |              |       |        |                |        |       |             |        |        |  |
|        | 6                | 12.5%    | 1.000 | 8          | 17.5%    | 1.000 | 12         | 19.3%    | 1.000 | 7            | 9.8%     | 1.000 |                                                            |          |      |              |       |        |                |        |       |             |        |        |  |
| FN0225 | 2                | 8.8%     | 0.826 | 2          | 6.4%     | 0.928 | 0          | 0.0%     | 0.000 | 1            | 2.0%     | 0.951 | AAL94431.1   Gluconate permease                            |          |      |              |       |        |                |        |       |             |        |        |  |
|        | 1                | 2.0%     | 0.877 | 3          | 10.8%    | 0.962 | 3          | 8.2%     | 0.987 | 1            | 2.0%     | 0.694 |                                                            |          |      |              |       |        |                |        |       |             |        |        |  |
| FN0226 | 13               | 58.4%    | 1.000 | 12         | 41.0%    | 1.000 | 8          | 37.7%    | 1.000 | 13           | 44.0%    | 1.000 | AAL94432.1   Pyridoxal phosphate biosynthetic protein pdxA |          |      |              |       |        |                |        |       |             |        |        |  |
|        | 12               | 47.0%    | 1.000 | 12         | 46.1%    | 1.000 | 11         | 49.4%    | 1.000 | 10           | 45.2%    | 1.000 |                                                            |          |      |              |       |        |                |        |       |             |        |        |  |
| FN0227 | 0                | 0.0%     | 0.000 | 0          | 0.0%     | 0.000 | 2          | 6.4%     | 0.995 | 2            | 6.4%     | 0.713 | AAL94433.1   Hypothetical protein                          |          |      |              |       |        |                |        |       |             |        |        |  |
|        | 1                | 1.6%     | 0.651 | 4          | 12.9%    | 0.987 | 4          | 11.1%    | 1.000 | 2            | 6.8%     | 0.672 |                                                            |          |      |              |       |        |                |        |       |             |        |        |  |
| FN0233 | 14               | 38.7%    | 1.000 | 11         | 29.9%    | 1.000 | 11         | 25.8%    | 1.000 | 16           | 42.1%    | 1.000 | AAL94439.1   Hypothetical protein                          |          |      |              |       |        |                |        |       |             |        |        |  |
|        | 16               | 26.7%    | 1.000 | 7          | 22.6%    | 1.000 | 10         | 25.8%    | 1.000 | 13           | 38.7%    | 1.000 |                                                            |          |      |              |       |        |                |        |       |             |        |        |  |
| FN0234 | 5                | 36.7%    | 1.000 | 2          | 7.5%     | 0.991 | 5          | 36.7%    | 1.000 | 0            | 0.0%     | 0.000 | AAL94440.1   unknown                                       |          |      |              |       |        |                |        |       |             |        |        |  |
|        | 6                | 37.4%    | 1.000 | 4          | 29.3%    | 1.000 | 7          | 49.0%    | 1.000 | 1            | 7.5%     | 0.688 |                                                            |          |      |              |       |        |                |        |       |             |        |        |  |
| FN0235 | 2                | 12.0%    | 0.987 | 6          | 23.6%    | 1.000 | 2          | 9.5%     | 0.679 | 0            | 0.0%     | 0.000 | AAL94441.1   ABC transporter ATP-binding protein           |          |      |              |       |        |                |        |       |             |        |        |  |
|        | 1                | 5.4%     | 0.890 | 0          | 0.0%     | 0.000 | 0          | 0.0%     | 0.000 | 1            | 2.9%     | 0.561 |                                                            |          |      |              |       |        |                |        |       |             |        |        |  |
| FN0236 | 19               | 55.1%    | 1.000 | 29         | 65.3%    | 1.000 | 15         | 47.6%    | 1.000 | 25           | 65.6%    | 1.000 | AAL94442.1   ABC transporter substrate-binding protein     |          |      |              |       |        |                |        |       |             |        |        |  |
|        | 21               | 62.6%    | 1.000 | 18         | 68.9%    | 1.000 | 18         | 56.3%    | 1.000 | 20           | 56.3%    | 1.000 |                                                            |          |      |              |       |        |                |        |       |             |        |        |  |
| FN0237 | 0                | 0.0%     |       | 3          | 23.7%    | 0.999 | 0          | 0.0%     | 0.000 | 2            | 11.6%    | 0.993 | AAL94443.1   ABC transporter permease protein              |          |      |              |       |        |                |        |       |             |        |        |  |
|        | 0                | 0.0%     |       | 0          | 0.0%     | 0.000 | 1          | 3.3%     | 0.958 | 1            | 6.2%     | 0.722 |                                                            |          |      |              |       |        |                |        |       |             |        |        |  |
| FN0238 | 8                | 25.5%    | 1.000 | 10         | 24.8%    | 1.000 | 8          | 27.1%    | 1.000 | 6            | 15.8%    | 1.000 | AAL94444.1   Hypothetical protein                          |          |      |              |       |        |                |        |       |             |        |        |  |
|        | 8                | 25.5%    | 1.000 | 10         | 29.7%    | 1.000 | 9          | 25.8%    | 1.000 | 6            | 18.1%    | 1.000 |                                                            |          |      |              |       |        |                |        |       |             |        |        |  |
| FN0240 | 14               | 38.2%    | 1.000 | 11         | 34.9%    | 1.000 | 13         | 40.0%    | 1.000 | 14           | 44.0%    | 1.000 | AAL94446.1   Thymidylate synthase                          |          |      |              |       |        |                |        |       |             |        |        |  |
|        | 13               | 30.9%    | 1.000 | 19         | 52.7%    | 1.000 | 12         | 33.8%    | 1.000 | 18           | 47.3%    | 1.000 |                                                            |          |      |              |       |        |                |        |       |             |        |        |  |

Show detected proteins only  
 Show all proteins  
 Filter by category:

Proteins found:  
 1424

Enter (or paste) list of ORFs

| ORF    | Fn Summary Table |          |       | FnPg vs Fn |          |       | FnSg vs Fn |          |       | FnPgSg vs Fn |          |       | FnPgSg vs FnPg                                          |          |      | FnSg vs FnPg |       |        | FnPgSg vs FnSg |        |       | Fn Coverage |        |        |  |
|--------|------------------|----------|-------|------------|----------|-------|------------|----------|-------|--------------|----------|-------|---------------------------------------------------------|----------|------|--------------|-------|--------|----------------|--------|-------|-------------|--------|--------|--|
|        | Fn               |          |       | FnPg       |          |       | FnSg       |          |       | FnPgSg       |          |       | Description                                             |          |      |              | Fn    |        | FnPg           |        | FnSg  |             | FnPgSg |        |  |
|        | n                | coverage | prob  | n          | coverage | prob  | n          | coverage | prob  | n            | coverage | prob  | n                                                       | coverage | prob | Description  | Rep I | Rep II | Rep I          | Rep II | Rep I | Rep II      | Rep I  | Rep II |  |
| FN0241 | 5                | 36.6%    | 1.000 | 3          | 15.2%    | 1.000 | 9          | 53.0%    | 1.000 | 6            | 42.1%    | 1.000 | AAL94447.1  Dihydrofolate reductase                     |          |      |              |       |        |                |        |       |             |        |        |  |
|        | 5                | 29.9%    | 1.000 | 11         | 65.9%    | 1.000 | 13         | 59.8%    | 1.000 | 4            | 25.0%    | 1.000 |                                                         |          |      |              |       |        |                |        |       |             |        |        |  |
| FN0242 | 14               | 33.4%    | 1.000 | 2          | 5.3%     | 1.000 | 19         | 44.7%    | 1.000 | 7            | 16.8%    | 1.000 | AAL94448.1  Trk system potassium uptake protein trkA    |          |      |              |       |        |                |        |       |             |        |        |  |
|        | 17               | 38.3%    | 1.000 | 16         | 40.3%    | 1.000 | 22         | 46.9%    | 1.000 | 5            | 13.5%    | 1.000 |                                                         |          |      |              |       |        |                |        |       |             |        |        |  |
| FN0243 | 4                | 13.7%    | 1.000 | 1          | 4.2%     | 0.984 | 8          | 22.4%    | 1.000 | 1            | 2.4%     | 0.471 | AAL94449.1  Poly(A) polymerase                          |          |      |              |       |        |                |        |       |             |        |        |  |
|        | 3                | 10.9%    | 1.000 | 9          | 25.7%    | 1.000 | 17         | 41.2%    | 1.000 | 4            | 8.9%     | 1.000 |                                                         |          |      |              |       |        |                |        |       |             |        |        |  |
| FN0244 | 4                | 53.6%    | 1.000 | 2          | 35.7%    | 0.999 | 4          | 53.6%    | 0.999 | 2            | 50.0%    | 0.999 | AAL94450.1  COP associated protein                      |          |      |              |       |        |                |        |       |             |        |        |  |
|        | 5                | 53.6%    | 1.000 | 3          | 53.6%    | 0.999 | 2          | 32.1%    | 0.992 | 2            | 50.0%    | 0.995 |                                                         |          |      |              |       |        |                |        |       |             |        |        |  |
| FN0245 | 7                | 8.8%     | 1.000 | 0          | 0.0%     | 0.000 | 5          | 7.5%     | 1.000 | 4            | 7.2%     | 1.000 | AAL94451.1  Copper-exporting ATPase                     |          |      |              |       |        |                |        |       |             |        |        |  |
|        | 7                | 10.1%    | 1.000 | 6          | 8.5%     | 1.000 | 9          | 14.2%    | 1.000 | 0            | 0.0%     | 0.000 |                                                         |          |      |              |       |        |                |        |       |             |        |        |  |
| FN0247 | 26               | 79.8%    | 1.000 | 11         | 54.8%    | 1.000 | 17         | 72.6%    | 1.000 | 19           | 63.9%    | 1.000 | AAL94453.1  Hypothetical cytosolic protein              |          |      |              |       |        |                |        |       |             |        |        |  |
|        | 25               | 72.2%    | 1.000 | 21         | 77.6%    | 1.000 | 20         | 76.4%    | 1.000 | 15           | 51.3%    | 1.000 |                                                         |          |      |              |       |        |                |        |       |             |        |        |  |
| FN0248 | 1                | 4.5%     | 0.309 | 1          | 9.1%     | 0.564 | 9          | 36.7%    | 1.000 | 5            | 16.9%    | 1.000 | AAL94454.1  Hypothetical Exported Protein               |          |      |              |       |        |                |        |       |             |        |        |  |
|        | 0                | 0.0%     | 0.000 | 11         | 38.0%    | 1.000 | 13         | 37.3%    | 1.000 | 2            | 7.8%     | 1.000 |                                                         |          |      |              |       |        |                |        |       |             |        |        |  |
| FN0249 | 14               | 39.5%    |       | 9          | 39.5%    |       | 8          | 39.5%    |       | 14           | 39.5%    |       | AAL94455.1  unknown                                     |          |      |              |       |        |                |        |       |             |        |        |  |
|        | 13               | 39.5%    |       | 9          | 39.5%    |       | 10         | 39.5%    |       | 14           | 39.5%    |       |                                                         |          |      |              |       |        |                |        |       |             |        |        |  |
| FN0250 | 13               | 57.0%    |       | 12         | 54.7%    |       | 10         | 58.7%    |       | 11           | 56.4%    |       | AAL94456.1  unknown                                     |          |      |              |       |        |                |        |       |             |        |        |  |
|        | 12               | 57.0%    |       | 10         | 58.7%    |       | 9          | 54.2%    |       | 10           | 56.4%    |       |                                                         |          |      |              |       |        |                |        |       |             |        |        |  |
| FN0251 | 11               | 47.6%    |       | 6          | 42.9%    |       | 9          | 58.7%    |       | 12           | 53.2%    |       | AAL94457.1  Hypothetical membrane-spanning Protein      |          |      |              |       |        |                |        |       |             |        |        |  |
|        | 10               | 46.8%    |       | 10         | 58.7%    |       | 7          | 53.2%    |       | 12           | 52.4%    |       |                                                         |          |      |              |       |        |                |        |       |             |        |        |  |
| FN0252 | 9                | 54.9%    |       | 8          | 45.1%    |       | 7          | 48.8%    |       | 8            | 54.9%    |       | AAL94458.1  unknown                                     |          |      |              |       |        |                |        |       |             |        |        |  |
|        | 8                | 48.8%    |       | 7          | 54.9%    |       | 5          | 45.1%    |       | 7            | 45.1%    |       |                                                         |          |      |              |       |        |                |        |       |             |        |        |  |
| FN0253 | 15               | 70.2%    |       | 0          | 0.0%     | 1.000 | 9          | 70.2%    |       | 16           | 70.2%    |       | AAL94459.1  Outer membrane protein                      |          |      |              |       |        |                |        |       |             |        |        |  |
|        | 13               | 70.2%    |       | 12         | 70.2%    | 0.000 | 9          | 70.2%    |       | 13           | 52.3%    |       |                                                         |          |      |              |       |        |                |        |       |             |        |        |  |
| FN0254 | 67               | 50.7%    | 1.000 | 38         | 32.1%    | 1.000 | 59         | 48.2%    | 1.000 | 51           | 43.6%    | 1.000 | AAL94460.1  Fusobacterium outer membrane protein family |          |      |              |       |        |                |        |       |             |        |        |  |
|        | 74               | 51.5%    | 1.000 | 74         | 56.1%    | 1.000 | 61         | 54.5%    | 1.000 | 56           | 43.3%    | 1.000 |                                                         |          |      |              |       |        |                |        |       |             |        |        |  |
| FN0258 | 8                | 14.7%    | 1.000 | 3          | 8.3%     | 1.000 | 1          | 2.8%     | 0.984 | 1            | 3.1%     | 0.982 | AAL94464.1  Zinc-transporting ATPase                    |          |      |              |       |        |                |        |       |             |        |        |  |
|        | 5                | 9.3%     | 1.000 | 4          | 9.4%     | 1.000 | 5          | 14.3%    | 1.000 | 4            | 10.9%    | 1.000 |                                                         |          |      |              |       |        |                |        |       |             |        |        |  |
| FN0259 | 2                | 26.0%    | 0.999 | 2          | 26.0%    | 0.998 | 0          | 0.0%     |       | 4            | 56.2%    | 1.000 | AAL94465.1  Zinc-transporting ATPase                    |          |      |              |       |        |                |        |       |             |        |        |  |
|        | 2                | 26.0%    | 1.000 | 0          | 0.0%     | 0.000 | 0          | 0.0%     |       | 5            | 57.5%    | 1.000 |                                                         |          |      |              |       |        |                |        |       |             |        |        |  |
| FN0260 | 2                | 22.4%    | 0.979 | 1          | 12.8%    | 0.955 | 0          | 0.0%     | 0.000 | 1            | 12.0%    | 0.982 | AAL94466.1  Transcriptional repressor smtB              |          |      |              |       |        |                |        |       |             |        |        |  |
|        | 3                | 22.4%    | 0.995 | 1          | 12.0%    | 0.364 | 1          | 9.6%     | 0.690 | 1            | 9.6%     | 0.655 |                                                         |          |      |              |       |        |                |        |       |             |        |        |  |

Show detected proteins only  
 Show all proteins  
 Filter by category:

Proteins found:  
 1424

Enter (or paste) list of ORFs

| ORF    | Fn Summary Table |          |       | FnPg vs Fn |          |       | FnSg vs Fn |          |       | FnPgSg vs Fn |          |       | FnPgSg vs FnPg                                                    |          |      | FnSg vs FnPg |        |       | FnPgSg vs FnSg |       |        | Fn Coverage |        |  |  |
|--------|------------------|----------|-------|------------|----------|-------|------------|----------|-------|--------------|----------|-------|-------------------------------------------------------------------|----------|------|--------------|--------|-------|----------------|-------|--------|-------------|--------|--|--|
|        | Fn               |          |       | FnPg       |          |       | FnSg       |          |       | FnPgSg       |          |       | Description                                                       |          |      |              | Fn     |       | FnPg           |       | FnSg   |             | FnPgSg |  |  |
|        | n                | coverage | prob  | n          | coverage | prob  | n          | coverage | prob  | n            | coverage | prob  | n                                                                 | coverage | prob | Rep I        | Rep II | Rep I | Rep II         | Rep I | Rep II | Rep I       | Rep II |  |  |
| FN0261 | 12               | 37.9%    | 1.000 | 4          | 16.0%    | 1.000 | 7          | 23.5%    | 1.000 | 6            | 25.1%    | 1.000 | AAL94467.1  Pyruvate formate-lyase activating enzyme              |          |      |              |        |       |                |       |        |             |        |  |  |
|        | 8                | 28.4%    | 1.000 | 2          | 4.9%     | 1.000 | 4          | 10.7%    | 1.000 | 6            | 31.7%    | 1.000 |                                                                   |          |      |              |        |       |                |       |        |             |        |  |  |
| FN0262 | 98               | 78.3%    | 1.000 | 86         | 75.4%    | 1.000 | 77         | 82.6%    | 1.000 | 103          | 81.7%    | 1.000 | AAL94468.1  Formate acetyltransferase                             |          |      |              |        |       |                |       |        |             |        |  |  |
|        | 103              | 80.1%    | 1.000 | 74         | 77.5%    | 1.000 | 80         | 79.7%    | 1.000 | 104          | 81.8%    | 1.000 |                                                                   |          |      |              |        |       |                |       |        |             |        |  |  |
| FN0263 | 22               | 66.7%    | 1.000 | 19         | 60.6%    | 1.000 | 18         | 63.2%    | 1.000 | 25           | 66.2%    | 1.000 | AAL94469.1  Peptidyl-prolyl cis-trans isomerase                   |          |      |              |        |       |                |       |        |             |        |  |  |
|        | 22               | 65.4%    | 1.000 | 20         | 62.8%    | 1.000 | 17         | 61.5%    | 1.000 | 19           | 64.1%    | 1.000 |                                                                   |          |      |              |        |       |                |       |        |             |        |  |  |
| FN0264 | 15               | 74.4%    | 1.000 | 9          | 68.2%    | 1.000 | 11         | 74.4%    | 1.000 | 13           | 72.1%    | 1.000 | AAL94470.1  Hypothetical protein                                  |          |      |              |        |       |                |       |        |             |        |  |  |
|        | 14               | 74.4%    | 1.000 | 11         | 77.5%    | 1.000 | 9          | 40.3%    | 1.000 | 12           | 72.1%    | 1.000 |                                                                   |          |      |              |        |       |                |       |        |             |        |  |  |
| FN0265 | 4                | 16.9%    | 1.000 | 0          | 0.0%     | 0.000 | 4          | 14.0%    | 1.000 | 4            | 21.4%    | 0.998 | AAL94471.1  Cell division protein ftsX                            |          |      |              |        |       |                |       |        |             |        |  |  |
|        | 6                | 20.1%    | 1.000 | 5          | 16.9%    | 1.000 | 4          | 22.1%    | 1.000 | 2            | 8.1%     | 0.995 |                                                                   |          |      |              |        |       |                |       |        |             |        |  |  |
| FN0266 | 4                | 13.2%    | 1.000 | 1          | 2.7%     | 0.955 | 2          | 6.9%     | 1.000 | 0            | 0.0%     | 0.000 | AAL94472.1  membrane protein related to metalloendopeptidase      |          |      |              |        |       |                |       |        |             |        |  |  |
|        | 4                | 13.2%    | 1.000 | 6          | 16.6%    | 0.995 | 2          | 2.7%     | 0.998 | 3            | 14.1%    | 0.876 |                                                                   |          |      |              |        |       |                |       |        |             |        |  |  |
| FN0267 | 5                | 19.1%    | 1.000 | 1          | 9.0%     | 0.697 | 0          | 0.0%     | 0.000 | 2            | 10.1%    | 0.922 | AAL94473.1  ATP-NAD kinase                                        |          |      |              |        |       |                |       |        |             |        |  |  |
|        | 6                | 35.6%    | 1.000 | 5          | 24.0%    | 1.000 | 5          | 21.3%    | 1.000 | 1            | 10.9%    | 0.340 |                                                                   |          |      |              |        |       |                |       |        |             |        |  |  |
| FN0268 | 8                | 19.7%    | 1.000 | 5          | 17.9%    | 1.000 | 2          | 7.5%     | 0.985 | 2            | 5.9%     | 0.965 | AAL94474.1  DNA repair protein recN                               |          |      |              |        |       |                |       |        |             |        |  |  |
|        | 10               | 21.0%    | 1.000 | 2          | 4.1%     | 0.798 | 11         | 24.7%    | 1.000 | 3            | 9.9%     | 0.883 |                                                                   |          |      |              |        |       |                |       |        |             |        |  |  |
| FN0270 | 4                | 12.2%    | 1.000 | 0          | 0.0%     | 0.000 | 3          | 9.8%     | 1.000 | 4            | 12.2%    | 0.989 | AAL94476.1  GTP-binding protein era                               |          |      |              |        |       |                |       |        |             |        |  |  |
|        | 5                | 12.2%    | 1.000 | 2          | 7.4%     | 0.999 | 4          | 18.2%    | 1.000 | 3            | 12.2%    | 0.997 |                                                                   |          |      |              |        |       |                |       |        |             |        |  |  |
| FN0271 | 4                | 21.2%    | 1.000 | 1          | 10.2%    | 0.972 | 3          | 8.7%     | 0.998 | 4            | 23.5%    | 1.000 | AAL94477.1  Enoyl-CoA hydratase                                   |          |      |              |        |       |                |       |        |             |        |  |  |
|        | 4                | 21.2%    | 1.000 | 7          | 25.0%    | 1.000 | 6          | 30.3%    | 1.000 | 0            | 0.0%     | 0.000 |                                                                   |          |      |              |        |       |                |       |        |             |        |  |  |
| FN0272 | 2                | 3.8%     | 0.955 | 2          | 3.8%     | 1.000 | 6          | 24.3%    | 1.000 | 2            | 10.0%    | 0.937 | AAL94478.1  Acetoacetate: butyrate/acetate coenzyme A transferase |          |      |              |        |       |                |       |        |             |        |  |  |
|        | 3                | 16.7%    | 0.999 | 3          | 18.0%    | 0.974 | 5          | 15.9%    | 1.000 | 0            | 0.0%     | 0.000 |                                                                   |          |      |              |        |       |                |       |        |             |        |  |  |
| FN0273 | 1                | 6.8%     | 0.467 | 0          | 0.0%     | 0.000 | 4          | 17.4%    | 1.000 | 1            | 4.6%     | 0.989 | AAL94479.1  Butyrate-acetoacetate CoA-transferase subunit B       |          |      |              |        |       |                |       |        |             |        |  |  |
|        | 0                | 0.0%     | 0.000 | 6          | 32.4%    | 1.000 | 6          | 28.3%    | 1.000 | 2            | 11.4%    | 0.912 |                                                                   |          |      |              |        |       |                |       |        |             |        |  |  |
| FN0276 | 2                | 2.7%     | 0.999 | 2          | 2.7%     | 0.999 | 10         | 18.5%    | 1.000 | 3            | 8.4%     | 1.000 | AAL94482.1  Sodium-dependent phosphate transporter                |          |      |              |        |       |                |       |        |             |        |  |  |
|        | 3                | 5.3%     | 1.000 | 9          | 18.3%    | 1.000 | 12         | 21.7%    | 1.000 | 2            | 5.1%     | 0.985 |                                                                   |          |      |              |        |       |                |       |        |             |        |  |  |
| FN0277 | 6                | 20.3%    | 1.000 | 3          | 19.0%    | 1.000 | 4          | 22.1%    | 1.000 | 4            | 14.1%    | 1.000 | AAL94483.1  Hypothetical protein                                  |          |      |              |        |       |                |       |        |             |        |  |  |
|        | 6                | 22.4%    | 1.000 | 6          | 24.1%    | 1.000 | 7          | 32.1%    | 1.000 | 4            | 13.8%    | 1.000 |                                                                   |          |      |              |        |       |                |       |        |             |        |  |  |
| FN0278 | 35               | 71.9%    | 1.000 | 30         | 61.7%    | 1.000 | 31         | 69.7%    | 1.000 | 34           | 70.8%    | 1.000 | AAL94484.1  Xaa-His dipeptidase                                   |          |      |              |        |       |                |       |        |             |        |  |  |
|        | 32               | 64.2%    | 1.000 | 39         | 79.4%    | 1.000 | 34         | 73.0%    | 1.000 | 36           | 74.1%    | 1.000 |                                                                   |          |      |              |        |       |                |       |        |             |        |  |  |
| FN0279 | 8                | 38.5%    | 1.000 | 8          | 41.5%    | 1.000 | 15         | 71.9%    | 1.000 | 7            | 35.4%    | 1.000 | AAL94485.1  Lipoprotein                                           |          |      |              |        |       |                |       |        |             |        |  |  |
|        | 11               | 55.8%    | 1.000 | 16         | 68.5%    | 1.000 | 14         | 68.5%    | 1.000 | 7            | 35.4%    | 1.000 |                                                                   |          |      |              |        |       |                |       |        |             |        |  |  |

Show detected proteins only

Show all proteins

Filter by category:

GO: amino acid transport

Proteins found:  
1424

Enter (or  
paste) list  
of ORFs

Find ORFs

Dot Plots

| ORF    | Fn Summary Table |          |       | FnPg vs Fn |          |       | FnSg vs Fn |          |       | FnPgSg vs Fn |          |       | FnPgSg vs FnPg                                                          |          |      | FnSg vs FnPg |       |        | FnPgSg vs FnSg |        |       | Fn Coverage |        |        |  |
|--------|------------------|----------|-------|------------|----------|-------|------------|----------|-------|--------------|----------|-------|-------------------------------------------------------------------------|----------|------|--------------|-------|--------|----------------|--------|-------|-------------|--------|--------|--|
|        | Fn               |          |       | FnPg       |          |       | FnSg       |          |       | FnPgSg       |          |       | Description                                                             |          |      |              | Fn    |        | FnPg           |        | FnSg  |             | FnPgSg |        |  |
|        | n                | coverage | prob  | n          | coverage | prob  | n          | coverage | prob  | n            | coverage | prob  | n                                                                       | coverage | prob | Description  | Rep I | Rep II | Rep I          | Rep II | Rep I | Rep II      | Rep I  | Rep II |  |
| FN0280 | 19               | 40.3%    | 1.000 | 10         | 28.3%    | 1.000 | 17         | 38.6%    | 1.000 | 13           | 36.3%    | 1.000 | AAL94486.1   Hypothetical protein                                       |          |      |              |       |        |                |        |       |             |        |        |  |
|        | 18               | 38.4%    | 1.000 | 22         | 41.2%    | 1.000 | 18         | 36.3%    | 1.000 | 13           | 37.7%    | 1.000 |                                                                         |          |      |              |       |        |                |        |       |             |        |        |  |
| FN0281 | 23               | 18.9%    | 1.000 | 9          | 8.5%     | 1.000 | 33         | 27.6%    | 1.000 | 9            | 8.5%     | 1.000 | AAL94487.1   DNA polymerase III alpha subunit                           |          |      |              |       |        |                |        |       |             |        |        |  |
|        | 19               | 15.5%    | 1.000 | 30         | 25.4%    | 1.000 | 48         | 36.5%    | 1.000 | 8            | 8.8%     | 1.000 |                                                                         |          |      |              |       |        |                |        |       |             |        |        |  |
| FN0282 | 11               | 47.6%    | 1.000 | 5          | 26.2%    | 1.000 | 9          | 38.5%    | 1.000 | 9            | 46.5%    | 1.000 | AAL94488.1   Hypothetical protein                                       |          |      |              |       |        |                |        |       |             |        |        |  |
|        | 10               | 47.6%    | 1.000 | 11         | 54.5%    | 1.000 | 12         | 59.4%    | 1.000 | 11           | 55.1%    | 1.000 |                                                                         |          |      |              |       |        |                |        |       |             |        |        |  |
| FN0283 | 1                | 8.0%     | 0.979 | 1          | 5.9%     | 0.829 | 1          | 10.5%    | 0.985 | 1            | 4.6%     | 0.989 | AAL94489.1   tRNA (Guanine-N1)-methyltransferase                        |          |      |              |       |        |                |        |       |             |        |        |  |
|        | 3                | 15.5%    | 1.000 | 5          | 31.9%    | 1.000 | 4          | 31.1%    | 1.000 | 3            | 20.6%    | 0.999 |                                                                         |          |      |              |       |        |                |        |       |             |        |        |  |
| FN0284 | 5                | 28.3%    | 1.000 | 0          | 0.0%     | 0.000 | 10         | 61.8%    | 1.000 | 3            | 14.5%    | 1.000 | AAL94490.1   16S rRNA processing protein rimM                           |          |      |              |       |        |                |        |       |             |        |        |  |
|        | 4                | 28.3%    | 1.000 | 8          | 40.5%    | 1.000 | 7          | 43.9%    | 1.000 | 7            | 38.2%    | 1.000 |                                                                         |          |      |              |       |        |                |        |       |             |        |        |  |
| FN0285 | 3                | 32.9%    | 1.000 | 1          | 21.5%    | 0.984 | 1          | 19.0%    | 0.896 | 7            | 63.3%    | 1.000 | AAL94491.1   RNA binding protein                                        |          |      |              |       |        |                |        |       |             |        |        |  |
|        | 1                | 11.4%    | 0.391 | 5          | 58.2%    | 1.000 | 1          | 16.5%    | 0.974 | 5            | 46.8%    | 1.000 |                                                                         |          |      |              |       |        |                |        |       |             |        |        |  |
| FN0287 | 4                | 21.2%    | 1.000 | 1          | 3.0%     | 0.406 | 4          | 22.3%    | 1.000 | 5            | 26.1%    | 1.000 | AAL94493.1   Dimethyladenosine transferase                              |          |      |              |       |        |                |        |       |             |        |        |  |
|        | 5                | 25.8%    | 1.000 | 7          | 29.2%    | 1.000 | 9          | 50.0%    | 1.000 | 4            | 15.2%    | 0.998 |                                                                         |          |      |              |       |        |                |        |       |             |        |        |  |
| FN0288 | 10               | 52.0%    | 1.000 | 7          | 36.6%    | 1.000 | 9          | 47.4%    | 1.000 | 9            | 46.3%    | 1.000 | AAL94494.1   Hypoxanthine-guanine phosphoribosyltransferase             |          |      |              |       |        |                |        |       |             |        |        |  |
|        | 8                | 40.0%    | 1.000 | 12         | 49.1%    | 1.000 | 8          | 41.7%    | 1.000 | 8            | 33.7%    | 1.000 |                                                                         |          |      |              |       |        |                |        |       |             |        |        |  |
| FN0290 | 0                | 0.0%     | 0.000 | 0          | 0.0%     | 0.000 | 0          | 0.0%     | 0.000 | 1            | 2.5%     | 0.465 | AAL94496.1   Hemolysin                                                  |          |      |              |       |        |                |        |       |             |        |        |  |
|        | 1                | 2.5%     | 0.278 | 1          | 2.5%     | 0.618 | 1          | 2.5%     | 0.541 | 3            | 6.6%     | 0.904 |                                                                         |          |      |              |       |        |                |        |       |             |        |        |  |
| FN0291 | 1                | 0.8%     | 0.278 | 2          | 1.2%     | 0.897 | 0          | 0.0%     | 0.000 | 4            | 2.9%     | 0.965 | AAL94497.1   Hemolysin                                                  |          |      |              |       |        |                |        |       |             |        |        |  |
|        | 3                | 2.9%     | 0.857 | 6          | 5.1%     | 1.000 | 4          | 4.3%     | 0.980 | 3            | 1.9%     | 0.768 |                                                                         |          |      |              |       |        |                |        |       |             |        |        |  |
| FN0294 | 19               | 73.7%    | 1.000 | 14         | 57.8%    | 1.000 | 13         | 57.0%    | 1.000 | 18           | 75.2%    | 1.000 | AAL94500.1   Transketolase subunit A                                    |          |      |              |       |        |                |        |       |             |        |        |  |
|        | 20               | 75.9%    | 1.000 | 20         | 77.4%    | 1.000 | 15         | 63.7%    | 1.000 | 14           | 68.5%    | 1.000 |                                                                         |          |      |              |       |        |                |        |       |             |        |        |  |
| FN0295 | 11               | 58.3%    | 1.000 | 15         | 64.7%    | 1.000 | 11         | 60.8%    | 1.000 | 12           | 68.3%    | 1.000 | AAL94501.1   Transketolase                                              |          |      |              |       |        |                |        |       |             |        |        |  |
|        | 13               | 58.6%    | 1.000 | 14         | 63.8%    | 1.000 | 16         | 67.3%    | 1.000 | 11           | 61.2%    | 1.000 |                                                                         |          |      |              |       |        |                |        |       |             |        |        |  |
| FN0296 | 9                | 32.5%    | 1.000 | 9          | 27.5%    | 1.000 | 8          | 27.1%    | 1.000 | 11           | 34.1%    | 1.000 | AAL94502.1   Hypothetical cytosolic protein                             |          |      |              |       |        |                |        |       |             |        |        |  |
|        | 9                | 32.9%    | 1.000 | 11         | 36.5%    | 1.000 | 9          | 30.6%    | 1.000 | 10           | 29.8%    | 1.000 |                                                                         |          |      |              |       |        |                |        |       |             |        |        |  |
| FN0297 | 4                | 14.5%    | 1.000 | 3          | 9.8%     | 1.000 | 7          | 23.6%    | 1.000 | 1            | 4.2%     | 0.989 | AAL94503.1   ATPase associated with chromosome architecture/replication |          |      |              |       |        |                |        |       |             |        |        |  |
|        | 6                | 22.1%    | 1.000 | 10         | 23.3%    | 1.000 | 11         | 28.5%    | 1.000 | 4            | 15.2%    | 0.999 |                                                                         |          |      |              |       |        |                |        |       |             |        |        |  |
| FN0298 | 30               | 56.9%    | 1.000 | 26         | 43.1%    | 1.000 | 38         | 63.4%    | 1.000 | 33           | 63.9%    | 1.000 | AAL94504.1   Histidyl-tRNA synthetase                                   |          |      |              |       |        |                |        |       |             |        |        |  |
|        | 30               | 60.8%    | 1.000 | 46         | 76.0%    | 1.000 | 34         | 61.3%    | 1.000 | 31           | 51.6%    | 1.000 |                                                                         |          |      |              |       |        |                |        |       |             |        |        |  |
| FN0299 | 39               | 57.6%    | 1.000 | 27         | 40.2%    | 1.000 | 33         | 54.1%    | 1.000 | 38           | 58.1%    | 1.000 | AAL94505.1   Aspartyl-tRNA synthetase                                   |          |      |              |       |        |                |        |       |             |        |        |  |
|        | 39               | 54.7%    | 1.000 | 41         | 62.7%    | 1.000 | 42         | 66.4%    | 1.000 | 40           | 64.2%    | 1.000 |                                                                         |          |      |              |       |        |                |        |       |             |        |        |  |

Show detected proteins only  
 Show all proteins  
 Filter by category:

Proteins found:  
 1424

Enter (or paste) list of ORFs

|        |    | Fn Summary Table |       |      | FnPg vs Fn |       |      | FnSg vs Fn |       |        | FnPgSg vs Fn |       |                                                                     | FnPgSg vs FnPg |        |       | FnSg vs FnPg |       |        | FnPgSg vs FnSg |        |  | Fn Coverage |  |  |  |
|--------|----|------------------|-------|------|------------|-------|------|------------|-------|--------|--------------|-------|---------------------------------------------------------------------|----------------|--------|-------|--------------|-------|--------|----------------|--------|--|-------------|--|--|--|
| ORF    | Fn |                  |       | FnPg |            |       | FnSg |            |       | FnPgSg |              |       | Description                                                         | Fn             |        | FnPg  |              | FnSg  |        | FnPgSg         |        |  |             |  |  |  |
|        | n  | coverage         | prob  | n    | coverage   | prob  | n    | coverage   | prob  | n      | coverage     | prob  |                                                                     | Rep I          | Rep II | Rep I | Rep II       | Rep I | Rep II | Rep I          | Rep II |  |             |  |  |  |
| FN0305 | 1  | 3.9%             | 0.848 | 2    | 6.2%       | 0.992 | 1    | 3.9%       | 0.605 | 3      | 8.3%         | 0.996 | AAL94511.1   Iron(III) dicitrate-binding protein                    |                |        |       |              |       |        |                |        |  |             |  |  |  |
|        | 3  | 10.1%            | 1.000 | 1    | 3.9%       | 0.983 | 1    | 3.9%       | 0.984 | 3      | 15.5%        | 0.997 |                                                                     |                |        |       |              |       |        |                |        |  |             |  |  |  |
| FN0307 | 0  | 0.0%             |       | 0    | 0.0%       |       | 0    | 0.0%       |       | 1      | 6.4%         | 0.950 | AAL94513.1   Iron(III) dicitrate transport ATP-binding protein fecE |                |        |       |              |       |        |                |        |  |             |  |  |  |
|        | 0  | 0.0%             |       | 0    | 0.0%       |       | 0    | 0.0%       |       | 3      | 15.9%        | 0.877 |                                                                     |                |        |       |              |       |        |                |        |  |             |  |  |  |
| FN0308 | 32 | 61.9%            | 1.000 | 23   | 65.9%      | 1.000 | 29   | 69.6%      | 1.000 | 32     | 66.5%        | 1.000 | AAL94514.1   Iron(III)-binding protein                              |                |        |       |              |       |        |                |        |  |             |  |  |  |
|        | 33 | 58.5%            | 1.000 | 28   | 69.6%      | 1.000 | 31   | 74.4%      | 1.000 | 33     | 71.3%        | 1.000 |                                                                     |                |        |       |              |       |        |                |        |  |             |  |  |  |
| FN0309 | 2  | 2.0%             | 0.999 | 2    | 8.0%       | 0.540 | 0    | 0.0%       |       | 3      | 8.2%         | 1.000 | AAL94515.1   Iron(III)-transport system permease protein sfuB       |                |        |       |              |       |        |                |        |  |             |  |  |  |
|        | 3  | 6.6%             | 1.000 | 1    | 4.6%       | 0.982 | 0    | 0.0%       |       | 4      | 10.0%        | 1.000 |                                                                     |                |        |       |              |       |        |                |        |  |             |  |  |  |
| FN0310 | 20 | 54.5%            | 1.000 | 15   | 46.6%      | 1.000 | 14   | 57.9%      | 1.000 | 20     | 57.9%        | 1.000 | AAL94516.1   Iron(III)-transport ATP-binding protein sfuC           |                |        |       |              |       |        |                |        |  |             |  |  |  |
|        | 19 | 54.5%            | 1.000 | 19   | 65.4%      | 1.000 | 14   | 51.1%      | 1.000 | 18     | 56.2%        | 1.000 |                                                                     |                |        |       |              |       |        |                |        |  |             |  |  |  |
| FN0311 | 28 | 37.5%            | 1.000 | 14   | 22.7%      | 1.000 | 29   | 39.8%      | 1.000 | 29     | 40.9%        | 1.000 | AAL94517.1   Anaerobic ribonucleoside-triphosphate reductase        |                |        |       |              |       |        |                |        |  |             |  |  |  |
|        | 27 | 37.0%            | 1.000 | 29   | 37.8%      | 1.000 | 28   | 38.7%      | 1.000 | 27     | 36.3%        | 1.000 |                                                                     |                |        |       |              |       |        |                |        |  |             |  |  |  |
| FN0313 | 4  | 10.3%            | 1.000 | 2    | 5.1%       | 0.742 | 8    | 18.6%      | 1.000 | 4      | 12.4%        | 1.000 | AAL94519.1   16S rRNA m(5)C 967 methyltransferase                   |                |        |       |              |       |        |                |        |  |             |  |  |  |
|        | 4  | 9.7%             | 1.000 | 6    | 14.7%      | 1.000 | 7    | 17.5%      | 1.000 | 2      | 4.1%         | 0.875 |                                                                     |                |        |       |              |       |        |                |        |  |             |  |  |  |
| FN0314 | 1  | 14.0%            | 0.804 | 0    | 0.0%       | 0.000 | 3    | 17.7%      | 1.000 | 2      | 12.6%        | 0.999 | AAL94520.1   Caffeoyl-CoA O-methyltransferase                       |                |        |       |              |       |        |                |        |  |             |  |  |  |
|        | 1  | 7.0%             | 0.981 | 4    | 23.3%      | 1.000 | 3    | 19.1%      | 1.000 | 1      | 5.6%         | 0.981 |                                                                     |                |        |       |              |       |        |                |        |  |             |  |  |  |
| FN0315 | 2  | 9.3%             | 0.858 | 2    | 3.6%       | 1.000 | 3    | 9.6%       | 1.000 | 0      | 0.0%         | 0.000 | AAL94521.1   Transcriptional regulator, AraC family                 |                |        |       |              |       |        |                |        |  |             |  |  |  |
|        | 1  | 3.2%             | 0.904 | 6    | 19.6%      | 1.000 | 6    | 20.6%      | 1.000 | 1      | 3.9%         | 0.967 |                                                                     |                |        |       |              |       |        |                |        |  |             |  |  |  |
| FN0316 | 6  | 42.4%            | 1.000 | 4    | 27.2%      | 1.000 | 3    | 13.9%      | 1.000 | 6      | 44.4%        | 1.000 | AAL94522.1   Hypothetical protein                                   |                |        |       |              |       |        |                |        |  |             |  |  |  |
|        | 7  | 41.7%            | 1.000 | 1    | 6.0%       | 0.983 | 3    | 23.2%      | 1.000 | 5      | 39.1%        | 1.000 |                                                                     |                |        |       |              |       |        |                |        |  |             |  |  |  |
| FN0317 | 7  | 22.8%            | 1.000 | 5    | 33.9%      | 1.000 | 12   | 47.1%      | 1.000 | 3      | 12.4%        | 1.000 | AAL94523.1   Tryptophan synthase beta chain                         |                |        |       |              |       |        |                |        |  |             |  |  |  |
|        | 5  | 20.8%            | 1.000 | 12   | 51.6%      | 1.000 | 17   | 53.9%      | 1.000 | 5      | 21.5%        | 1.000 |                                                                     |                |        |       |              |       |        |                |        |  |             |  |  |  |
| FN0319 | 7  | 25.2%            | 1.000 | 2    | 13.0%      | 0.987 | 4    | 21.2%      | 1.000 | 2      | 7.0%         | 1.000 | AAL94525.1   Citrate (pro-3S)-lyase ligase                          |                |        |       |              |       |        |                |        |  |             |  |  |  |
|        | 5  | 14.8%            | 1.000 | 3    | 12.8%      | 1.000 | 6    | 19.1%      | 1.000 | 3      | 17.7%        | 1.000 |                                                                     |                |        |       |              |       |        |                |        |  |             |  |  |  |
| FN0320 | 9  | 40.0%            | 1.000 | 5    | 32.8%      | 1.000 | 4    | 28.3%      | 1.000 | 10     | 41.7%        | 1.000 | AAL94526.1   Hypothetical cytosolic protein                         |                |        |       |              |       |        |                |        |  |             |  |  |  |
|        | 8  | 35.0%            | 1.000 | 8    | 35.6%      | 1.000 | 3    | 17.8%      | 1.000 | 10     | 48.3%        | 1.000 |                                                                     |                |        |       |              |       |        |                |        |  |             |  |  |  |
| FN0321 | 29 | 47.3%            | 1.000 | 21   | 38.4%      | 1.000 | 35   | 52.2%      | 1.000 | 32     | 49.8%        | 1.000 | AAL94527.1   Heat shock protein htpG                                |                |        |       |              |       |        |                |        |  |             |  |  |  |
|        | 23 | 40.0%            | 1.000 | 39   | 54.4%      | 1.000 | 41   | 58.6%      | 1.000 | 26     | 46.0%        | 1.000 |                                                                     |                |        |       |              |       |        |                |        |  |             |  |  |  |
| FN0322 | 39 | 72.5%            | 1.000 | 36   | 75.9%      | 1.000 | 33   | 82.7%      | 1.000 | 37     | 73.2%        | 1.000 | AAL94528.1   Fructose-bisphosphate aldolase                         |                |        |       |              |       |        |                |        |  |             |  |  |  |
|        | 40 | 76.9%            | 1.000 | 33   | 78.0%      | 1.000 | 26   | 76.3%      | 1.000 | 37     | 76.3%        | 1.000 |                                                                     |                |        |       |              |       |        |                |        |  |             |  |  |  |
| FN0325 | 9  | 32.8%            | 1.000 | 3    | 20.7%      | 0.999 | 0    | 0.0%       | 0.000 | 9      | 32.8%        | 1.000 | AAL94529.1   LSU ribosomal protein L20P                             |                |        |       |              |       |        |                |        |  |             |  |  |  |
|        | 9  | 32.8%            | 1.000 | 2    | 19.8%      | 0.858 | 3    | 31.0%      | 0.998 | 11     | 39.7%        | 1.000 |                                                                     |                |        |       |              |       |        |                |        |  |             |  |  |  |

Show detected proteins only  
 Show all proteins  
 Filter by category:

Proteins found:  
 1424

Enter (or paste) list of ORFs

| ORF    | Fn Summary Table |          |       | FnPg vs Fn |          |       | FnSg vs Fn |          |       | FnPgSg vs Fn |          |       | FnPgSg vs FnPg                                                       |          |      | FnSg vs FnPg |       |        | FnPgSg vs FnSg |        |       | Fn Coverage |        |        |  |
|--------|------------------|----------|-------|------------|----------|-------|------------|----------|-------|--------------|----------|-------|----------------------------------------------------------------------|----------|------|--------------|-------|--------|----------------|--------|-------|-------------|--------|--------|--|
|        | Fn               |          |       | FnPg       |          |       | FnSg       |          |       | FnPgSg       |          |       | Description                                                          |          |      |              | Fn    |        | FnPg           |        | FnSg  |             | FnPgSg |        |  |
|        | n                | coverage | prob  | n          | coverage | prob  | n          | coverage | prob  | n            | coverage | prob  | n                                                                    | coverage | prob | Description  | Rep I | Rep II | Rep I          | Rep II | Rep I | Rep II      | Rep I  | Rep II |  |
| FN0326 | 3                | 19.1%    | 0.999 | 2          | 19.1%    | 0.907 | 0          | 0.0%     | 0.000 | 5            | 32.4%    | 1.000 | AAL94530.1  LSU ribosomal protein L35P                               |          |      |              |       |        |                |        |       |             |        |        |  |
|        | 2                | 19.1%    | 0.988 | 2          | 32.4%    | 0.995 | 1          | 14.7%    | 0.935 | 5            | 32.4%    | 1.000 |                                                                      |          |      |              |       |        |                |        |       |             |        |        |  |
| FN0327 | 6                | 17.6%    | 1.000 | 2          | 11.7%    | 0.968 | 3          | 13.8%    | 1.000 | 4            | 21.3%    | 1.000 | AAL94531.1  Bacterial Protein Translation Initiation Factor 3 (IF-3) |          |      |              |       |        |                |        |       |             |        |        |  |
|        | 6                | 17.6%    | 1.000 | 4          | 17.0%    | 1.000 | 5          | 26.6%    | 1.000 | 4            | 16.5%    | 1.000 |                                                                      |          |      |              |       |        |                |        |       |             |        |        |  |
| FN0329 | 25               | 75.0%    | 1.000 | 22         | 65.3%    | 1.000 | 19         | 72.9%    | 1.000 | 17           | 65.3%    | 1.000 | AAL94533.1  LSU ribosomal protein L13P                               |          |      |              |       |        |                |        |       |             |        |        |  |
|        | 24               | 72.2%    | 1.000 | 20         | 75.7%    | 1.000 | 19         | 72.9%    | 1.000 | 21           | 68.8%    | 1.000 |                                                                      |          |      |              |       |        |                |        |       |             |        |        |  |
| FN0330 | 11               | 51.9%    | 1.000 | 5          | 21.1%    | 1.000 | 5          | 36.1%    | 1.000 | 15           | 61.7%    | 1.000 | AAL94534.1  SSU ribosomal protein S9P                                |          |      |              |       |        |                |        |       |             |        |        |  |
|        | 11               | 60.2%    | 1.000 | 9          | 51.1%    | 1.000 | 6          | 48.1%    | 1.000 | 15           | 58.6%    | 1.000 |                                                                      |          |      |              |       |        |                |        |       |             |        |        |  |
| FN0331 | 18               | 52.0%    | 1.000 | 6          | 25.2%    | 1.000 | 14         | 38.9%    | 1.000 | 16           | 54.4%    | 1.000 | AAL94535.1  Hypothetical protein                                     |          |      |              |       |        |                |        |       |             |        |        |  |
|        | 22               | 65.3%    | 1.000 | 15         | 48.3%    | 1.000 | 17         | 68.1%    | 1.000 | 13           | 50.5%    | 1.000 |                                                                      |          |      |              |       |        |                |        |       |             |        |        |  |
| FN0332 | 1                | 4.8%     | 0.434 | 1          | 2.6%     | 0.952 | 5          | 18.5%    | 1.000 | 3            | 13.7%    | 0.998 | AAL94536.1  Magnesium and cobalt transport protein corA              |          |      |              |       |        |                |        |       |             |        |        |  |
|        | 2                | 10.0%    | 1.000 | 5          | 16.8%    | 1.000 | 4          | 14.8%    | 1.000 | 0            | 0.0%     | 0.000 |                                                                      |          |      |              |       |        |                |        |       |             |        |        |  |
| FN0333 | 2                | 14.5%    | 0.983 | 2          | 9.1%     | 0.942 | 4          | 26.9%    | 1.000 | 1            | 8.6%     | 0.975 | AAL94537.1  Glycerol uptake operon antiterminator regulatory protein |          |      |              |       |        |                |        |       |             |        |        |  |
|        | 2                | 14.5%    | 0.992 | 4          | 26.3%    | 1.000 | 3          | 27.4%    | 0.999 | 1            | 8.6%     | 0.986 |                                                                      |          |      |              |       |        |                |        |       |             |        |        |  |
| FN0334 | 27               | 61.4%    | 1.000 | 18         | 46.0%    | 1.000 | 33         | 68.4%    | 1.000 | 24           | 53.7%    | 1.000 | AAL94538.1  Aspartate/aromatic aminotransferase                      |          |      |              |       |        |                |        |       |             |        |        |  |
|        | 28               | 61.2%    | 1.000 | 30         | 69.4%    | 1.000 | 31         | 66.3%    | 1.000 | 20           | 45.3%    | 1.000 |                                                                      |          |      |              |       |        |                |        |       |             |        |        |  |
| FN0335 | 23               | 81.4%    | 1.000 | 22         | 75.0%    | 1.000 | 25         | 81.4%    | 1.000 | 22           | 78.5%    | 1.000 | AAL94539.1  Outer membrane porin F                                   |          |      |              |       |        |                |        |       |             |        |        |  |
|        | 25               | 81.4%    | 1.000 | 22         | 81.4%    | 1.000 | 24         | 81.4%    | 1.000 | 19           | 77.3%    | 1.000 |                                                                      |          |      |              |       |        |                |        |       |             |        |        |  |
| FN0336 | 14               | 51.7%    | 1.000 | 1          | 10.4%    | 0.984 | 10         | 44.6%    | 1.000 | 12           | 47.1%    | 1.000 | AAL94540.1  Hypothetical protein                                     |          |      |              |       |        |                |        |       |             |        |        |  |
|        | 15               | 51.7%    | 1.000 | 11         | 45.0%    | 1.000 | 10         | 45.8%    | 1.000 | 13           | 50.8%    | 1.000 |                                                                      |          |      |              |       |        |                |        |       |             |        |        |  |
| FN0341 | 5                | 10.2%    | 1.000 | 2          | 7.7%     | 0.999 | 3          | 10.2%    | 0.999 | 6            | 12.2%    | 1.000 | AAL94545.1  transport protein                                        |          |      |              |       |        |                |        |       |             |        |        |  |
|        | 5                | 10.2%    | 1.000 | 7          | 18.3%    | 1.000 | 4          | 15.6%    | 1.000 | 5            | 10.9%    | 1.000 |                                                                      |          |      |              |       |        |                |        |       |             |        |        |  |
| FN0342 | 7                | 58.7%    | 1.000 | 5          | 53.9%    | 1.000 | 6          | 53.9%    | 1.000 | 11           | 83.8%    | 1.000 | AAL94546.1  Peptidyl-prolyl cis-trans isomerase                      |          |      |              |       |        |                |        |       |             |        |        |  |
|        | 7                | 71.3%    | 1.000 | 5          | 53.9%    | 1.000 | 5          | 44.3%    | 1.000 | 11           | 69.5%    | 1.000 |                                                                      |          |      |              |       |        |                |        |       |             |        |        |  |
| FN0343 | 3                | 18.3%    | 0.998 | 0          | 0.0%     |       | 1          | 9.4%     | 0.385 | 0            | 0.0%     | 0.000 | AAL94547.1  Hypothetical protein                                     |          |      |              |       |        |                |        |       |             |        |        |  |
|        | 1                | 4.9%     | 0.942 | 0          | 0.0%     |       | 1          | 6.2%     | 0.498 | 1            | 6.2%     | 0.324 |                                                                      |          |      |              |       |        |                |        |       |             |        |        |  |
| FN0344 | 2                | 7.4%     | 0.993 | 2          | 4.7%     | 0.989 | 1          | 4.7%     | 0.974 | 1            | 2.9%     | 0.421 | AAL94548.1  Methyltransferase                                        |          |      |              |       |        |                |        |       |             |        |        |  |
|        | 5                | 15.3%    | 1.000 | 1          | 3.2%     | 0.930 | 3          | 9.0%     | 1.000 | 1            | 2.4%     | 0.821 |                                                                      |          |      |              |       |        |                |        |       |             |        |        |  |
| FN0347 | 18               | 43.7%    | 1.000 | 6          | 18.0%    | 1.000 | 18         | 43.7%    | 1.000 | 12           | 32.3%    | 1.000 | AAL94551.1  Phosphatidylserine decarboxylase                         |          |      |              |       |        |                |        |       |             |        |        |  |
|        | 20               | 44.0%    | 1.000 | 23         | 50.7%    | 1.000 | 17         | 42.3%    | 1.000 | 9            | 29.7%    | 1.000 |                                                                      |          |      |              |       |        |                |        |       |             |        |        |  |
| FN0348 | 34               | 62.7%    | 1.000 | 16         | 36.9%    | 1.000 | 29         | 56.3%    | 1.000 | 29           | 62.1%    | 1.000 | AAL94552.1  Nicotinate phosphoribosyltransferase                     |          |      |              |       |        |                |        |       |             |        |        |  |
|        | 35               | 61.7%    | 1.000 | 35         | 60.9%    | 1.000 | 27         | 55.1%    | 1.000 | 32           | 67.1%    | 1.000 |                                                                      |          |      |              |       |        |                |        |       |             |        |        |  |

Show detected proteins only  
 Show all proteins  
 Filter by category:

Proteins found:  
1424

Enter (or paste) list of ORFs

Find ORFs

[Dot Plots](#) [Dot Plots](#)



| ORF    | Fn Summary Table |          |       | FnPg vs Fn |          |       | FnSg vs Fn |          |       | FnPgSg vs Fn |          |       | FnPgSg vs FnPg                                              |          |      | FnSg vs FnPg |       |        | FnPgSg vs FnSg |        |       | Fn Coverage |        |        |  |
|--------|------------------|----------|-------|------------|----------|-------|------------|----------|-------|--------------|----------|-------|-------------------------------------------------------------|----------|------|--------------|-------|--------|----------------|--------|-------|-------------|--------|--------|--|
|        | Fn               |          |       | FnPg       |          |       | FnSg       |          |       | FnPgSg       |          |       | Description                                                 |          |      |              | Fn    |        | FnPg           |        | FnSg  |             | FnPgSg |        |  |
|        | n                | coverage | prob  | n          | coverage | prob  | n          | coverage | prob  | n            | coverage | prob  | n                                                           | coverage | prob | Description  | Rep I | Rep II | Rep I          | Rep II | Rep I | Rep II      | Rep I  | Rep II |  |
| FN0349 | 3                | 30.5%    | 0.999 | 4          | 30.5%    | 1.000 | 5          | 41.6%    | 1.000 | 4            | 31.2%    | 1.000 | AAL94553.1  D-Tyr-tRNA <sup>Tyr</sup> deacylase             |          |      |              |       |        |                |        |       |             |        |        |  |
|        | 3                | 30.5%    | 0.998 | 7          | 53.2%    | 1.000 | 5          | 51.3%    | 1.000 | 2            | 10.4%    | 0.981 |                                                             |          |      |              |       |        |                |        |       |             |        |        |  |
| FN0351 | 17               | 66.7%    | 1.000 | 12         | 53.5%    | 1.000 | 7          | 52.1%    | 1.000 | 16           | 64.6%    | 1.000 | AAL94555.1  unknown                                         |          |      |              |       |        |                |        |       |             |        |        |  |
|        | 19               | 66.7%    | 1.000 | 7          | 54.2%    | 1.000 | 7          | 57.6%    | 1.000 | 13           | 68.8%    | 1.000 |                                                             |          |      |              |       |        |                |        |       |             |        |        |  |
| FN0352 | 4                | 5.9%     | 1.000 | 3          | 5.9%     | 1.000 | 6          | 11.1%    | 1.000 | 6            | 12.2%    | 1.000 | AAL94556.1  NA <sup>+</sup> /H <sup>+</sup> antiporter NHAC |          |      |              |       |        |                |        |       |             |        |        |  |
|        | 5                | 5.9%     | 1.000 | 7          | 13.5%    | 1.000 | 5          | 11.1%    | 1.000 | 4            | 12.2%    | 1.000 |                                                             |          |      |              |       |        |                |        |       |             |        |        |  |
| FN0355 | 26               | 49.6%    | 1.000 | 14         | 34.2%    | 1.000 | 24         | 43.3%    | 1.000 | 26           | 52.2%    | 1.000 | AAL94558.1  S-adenosylmethionine synthetase                 |          |      |              |       |        |                |        |       |             |        |        |  |
|        | 26               | 52.0%    | 1.000 | 27         | 47.5%    | 1.000 | 26         | 51.7%    | 1.000 | 21           | 46.0%    | 1.000 |                                                             |          |      |              |       |        |                |        |       |             |        |        |  |
| FN0356 | 3                | 19.5%    | 1.000 | 4          | 23.6%    | 1.000 | 3          | 20.3%    | 1.000 | 5            | 38.2%    | 1.000 | AAL94559.1  Lactoylglutathione lyase                        |          |      |              |       |        |                |        |       |             |        |        |  |
|        | 4                | 30.1%    | 1.000 | 4          | 30.1%    | 1.000 | 2          | 12.2%    | 1.000 | 4            | 27.6%    | 1.000 |                                                             |          |      |              |       |        |                |        |       |             |        |        |  |
| FN0357 | 5                | 57.5%    | 1.000 | 3          | 36.6%    | 0.999 | 4          | 36.6%    | 1.000 | 4            | 35.8%    | 1.000 | AAL94560.1  ATP synthase epsilon chain, sodium ion specific |          |      |              |       |        |                |        |       |             |        |        |  |
|        | 3                | 35.8%    | 1.000 | 7          | 46.3%    | 1.000 | 6          | 58.2%    | 1.000 | 4            | 35.8%    | 1.000 |                                                             |          |      |              |       |        |                |        |       |             |        |        |  |
| FN0358 | 32               | 74.7%    | 1.000 | 29         | 72.5%    | 1.000 | 36         | 81.4%    | 1.000 | 28           | 70.6%    | 1.000 | AAL94561.1  ATP synthase beta chain, sodium ion specific    |          |      |              |       |        |                |        |       |             |        |        |  |
|        | 30               | 71.6%    | 1.000 | 33         | 82.5%    | 1.000 | 36         | 81.6%    | 1.000 | 29           | 70.6%    | 1.000 |                                                             |          |      |              |       |        |                |        |       |             |        |        |  |
| FN0359 | 15               | 46.1%    | 1.000 | 9          | 38.3%    | 1.000 | 13         | 54.3%    | 1.000 | 10           | 47.2%    | 1.000 | AAL94562.1  ATP synthase gamma chain, sodium ion specific   |          |      |              |       |        |                |        |       |             |        |        |  |
|        | 15               | 51.4%    | 1.000 | 13         | 52.1%    | 1.000 | 14         | 53.9%    | 1.000 | 12           | 44.7%    | 1.000 |                                                             |          |      |              |       |        |                |        |       |             |        |        |  |
| FN0360 | 22               | 32.0%    | 1.000 | 18         | 28.6%    | 1.000 | 23         | 31.0%    | 1.000 | 25           | 37.0%    | 1.000 | AAL94563.1  ATP synthase alpha chain, sodium ion specific   |          |      |              |       |        |                |        |       |             |        |        |  |
|        | 22               | 31.2%    | 1.000 | 26         | 36.4%    | 1.000 | 24         | 34.6%    | 1.000 | 26           | 39.8%    | 1.000 |                                                             |          |      |              |       |        |                |        |       |             |        |        |  |
| FN0361 | 11               | 37.4%    | 1.000 | 5          | 14.9%    | 1.000 | 7          | 27.6%    | 1.000 | 9            | 33.3%    | 1.000 | AAL94564.1  ATP synthase delta chain, sodium ion specific   |          |      |              |       |        |                |        |       |             |        |        |  |
|        | 8                | 24.1%    | 1.000 | 5          | 25.9%    | 1.000 | 10         | 39.7%    | 1.000 | 6            | 19.0%    | 1.000 |                                                             |          |      |              |       |        |                |        |       |             |        |        |  |
| FN0362 | 9                | 28.2%    | 1.000 | 1          | 7.4%     | 0.984 | 6          | 21.5%    | 1.000 | 7            | 25.8%    | 1.000 | AAL94565.1  ATP synthase B chain, sodium ion specific       |          |      |              |       |        |                |        |       |             |        |        |  |
|        | 7                | 33.7%    | 1.000 | 6          | 20.9%    | 1.000 | 8          | 28.2%    | 1.000 | 8            | 26.4%    | 1.000 |                                                             |          |      |              |       |        |                |        |       |             |        |        |  |
| FN0364 | 1                | 11.0%    | 0.709 | 1          | 11.0%    | 0.721 | 1          | 11.0%    | 0.733 | 3            | 35.3%    | 0.992 | AAL94567.1  ATP synthase A chain, sodium ion specific       |          |      |              |       |        |                |        |       |             |        |        |  |
|        | 3                | 28.4%    | 0.876 | 4          | 40.4%    | 1.000 | 2          | 23.4%    | 0.998 | 3            | 28.4%    | 1.000 |                                                             |          |      |              |       |        |                |        |       |             |        |        |  |
| FN0366 | 39               | 62.2%    | 1.000 | 20         | 39.2%    | 1.000 | 35         | 60.2%    | 1.000 | 35           | 62.2%    | 1.000 | AAL94569.1  Phosphoglucosamine mutase                       |          |      |              |       |        |                |        |       |             |        |        |  |
|        | 42               | 64.4%    | 1.000 | 38         | 63.5%    | 1.000 | 28         | 55.8%    | 1.000 | 32           | 58.2%    | 1.000 |                                                             |          |      |              |       |        |                |        |       |             |        |        |  |
| FN0368 | 16               | 30.2%    | 1.000 | 7          | 14.9%    | 1.000 | 16         | 32.7%    | 1.000 | 16           | 30.2%    | 1.000 | AAL94571.1  Adenylosuccinate lyase                          |          |      |              |       |        |                |        |       |             |        |        |  |
|        | 15               | 30.0%    | 1.000 | 29         | 41.7%    | 1.000 | 21         | 34.0%    | 1.000 | 12           | 21.6%    | 1.000 |                                                             |          |      |              |       |        |                |        |       |             |        |        |  |
| FN0370 | 13               | 49.0%    | 1.000 | 4          | 19.9%    | 1.000 | 10         | 39.5%    | 1.000 | 9            | 31.5%    | 1.000 | AAL94573.1  Signal peptidase I                              |          |      |              |       |        |                |        |       |             |        |        |  |
|        | 16               | 42.3%    | 1.000 | 12         | 40.9%    | 1.000 | 8          | 27.6%    | 1.000 | 12           | 32.2%    | 1.000 |                                                             |          |      |              |       |        |                |        |       |             |        |        |  |
| FN0371 | 14               | 36.1%    | 1.000 | 6          | 20.8%    | 1.000 | 3          | 22.4%    | 1.000 | 16           | 45.1%    | 1.000 | AAL94574.1  Hypothetical protein                            |          |      |              |       |        |                |        |       |             |        |        |  |
|        | 14               | 36.1%    | 1.000 | 5          | 22.7%    | 1.000 | 2          | 14.1%    | 0.999 | 14           | 34.1%    | 1.000 |                                                             |          |      |              |       |        |                |        |       |             |        |        |  |

Show detected proteins only  
 Show all proteins  
 Filter by category:

Proteins found:  
1424

Enter (or paste) list of ORFs

Find ORFs

[Dot Plots](#) [Dot Plots](#)

| ORF    | Fn Summary Table |          |       | FnPg vs Fn |          |       | FnSg vs Fn |          |       | FnPgSg vs Fn |          |       | FnPgSg vs FnPg                                                 |          |      | FnSg vs FnPg |       |        | FnPgSg vs FnSg |        |       | Fn Coverage |        |        |  |
|--------|------------------|----------|-------|------------|----------|-------|------------|----------|-------|--------------|----------|-------|----------------------------------------------------------------|----------|------|--------------|-------|--------|----------------|--------|-------|-------------|--------|--------|--|
|        | Fn               |          |       | FnPg       |          |       | FnSg       |          |       | FnPgSg       |          |       | Description                                                    |          |      |              | Fn    |        | FnPg           |        | FnSg  |             | FnPgSg |        |  |
|        | n                | coverage | prob  | n          | coverage | prob  | n          | coverage | prob  | n            | coverage | prob  | n                                                              | coverage | prob | Description  | Rep I | Rep II | Rep I          | Rep II | Rep I | Rep II      | Rep I  | Rep II |  |
| FN0374 | 3                | 5.0%     | 0.956 | 5          | 9.5%     | 1.000 | 2          | 4.0%     | 0.998 | 2            | 2.1%     | 0.999 | AAL94577.1  Single-stranded-DNA-specific exonuclease recJ      |          |      |              |       |        |                |        |       |             |        |        |  |
|        | 4                | 4.1%     | 1.000 | 4          | 5.9%     | 1.000 | 8          | 9.0%     | 1.000 | 2            | 2.3%     | 0.748 |                                                                |          |      |              |       |        |                |        |       |             |        |        |  |
| FN0375 | 35               | 80.4%    | 1.000 | 33         | 73.3%    | 1.000 | 34         | 85.2%    | 1.000 | 35           | 83.2%    | 1.000 | AAL94578.1  Iron(III)-binding protein                          |          |      |              |       |        |                |        |       |             |        |        |  |
|        | 37               | 79.3%    | 1.000 | 33         | 85.2%    | 1.000 | 30         | 82.4%    | 1.000 | 37           | 83.8%    | 1.000 |                                                                |          |      |              |       |        |                |        |       |             |        |        |  |
| FN0376 | 12               | 35.8%    | 1.000 | 12         | 33.4%    | 1.000 | 23         | 53.9%    | 1.000 | 10           | 34.2%    | 1.000 | AAL94579.1  Iron(III)-transport ATP-binding protein sfuC       |          |      |              |       |        |                |        |       |             |        |        |  |
|        | 12               | 35.8%    | 1.000 | 22         | 50.4%    | 1.000 | 20         | 43.9%    | 1.000 | 13           | 41.5%    | 1.000 |                                                                |          |      |              |       |        |                |        |       |             |        |        |  |
| FN0377 | 2                | 6.5%     | 0.999 | 2          | 9.5%     | 0.981 | 0          | 0.0%     | 0.000 | 6            | 15.6%    | 1.000 | AAL94580.1  Iron(III)-transport system permease protein sfuB   |          |      |              |       |        |                |        |       |             |        |        |  |
|        | 4                | 6.5%     | 1.000 | 1          | 4.4%     | 0.893 | 4          | 7.8%     | 1.000 | 3            | 8.4%     | 0.999 |                                                                |          |      |              |       |        |                |        |       |             |        |        |  |
| FN0378 | 4                | 10.2%    | 1.000 | 1          | 7.1%     | 0.405 | 3          | 16.4%    | 0.995 | 3            | 12.0%    | 1.000 | AAL94581.1  UDP-glucose 4-epimerase                            |          |      |              |       |        |                |        |       |             |        |        |  |
|        | 4                | 10.2%    | 1.000 | 2          | 7.1%     | 0.999 | 5          | 17.0%    | 1.000 | 4            | 14.2%    | 1.000 |                                                                |          |      |              |       |        |                |        |       |             |        |        |  |
| FN0379 | 8                | 19.7%    | 1.000 | 5          | 13.9%    | 1.000 | 1          | 7.1%     | 0.805 | 7            | 25.1%    | 1.000 | AAL94582.1  Hypothetical protein                               |          |      |              |       |        |                |        |       |             |        |        |  |
|        | 3                | 13.2%    | 1.000 | 4          | 13.9%    | 0.900 | 4          | 15.6%    | 1.000 | 5            | 21.0%    | 1.000 |                                                                |          |      |              |       |        |                |        |       |             |        |        |  |
| FN0380 | 8                | 31.4%    | 1.000 | 2          | 7.9%     | 0.999 | 1          | 3.0%     | 0.959 | 2            | 7.3%     | 1.000 | AAL94583.1  unknown                                            |          |      |              |       |        |                |        |       |             |        |        |  |
|        | 3                | 14.5%    | 1.000 | 6          | 21.8%    | 1.000 | 2          | 7.3%     | 0.987 | 5            | 17.8%    | 1.000 |                                                                |          |      |              |       |        |                |        |       |             |        |        |  |
| FN0381 | 7                | 27.3%    | 1.000 | 2          | 7.1%     | 0.973 | 1          | 5.7%     | 0.343 | 6            | 25.5%    | 1.000 | AAL94584.1  unknown                                            |          |      |              |       |        |                |        |       |             |        |        |  |
|        | 6                | 23.0%    | 1.000 | 2          | 8.9%     | 0.956 | 0          | 0.0%     | 0.000 | 7            | 28.7%    | 1.000 |                                                                |          |      |              |       |        |                |        |       |             |        |        |  |
| FN0382 | 4                | 12.5%    | 1.000 | 0          | 0.0%     | 0.000 | 0          | 0.0%     | 0.000 | 1            | 4.4%     | 0.988 | AAL94585.1  Hypothetical protein                               |          |      |              |       |        |                |        |       |             |        |        |  |
|        | 5                | 12.5%    | 1.000 | 0          | 0.0%     | 0.000 | 1          | 4.7%     | 0.860 | 0            | 0.0%     | 0.000 |                                                                |          |      |              |       |        |                |        |       |             |        |        |  |
| FN0383 | 3                | 7.2%     | 1.000 | 1          | 2.3%     | 0.388 | 1          | 4.7%     | 0.391 | 1            | 2.3%     | 0.989 | AAL94586.1  Lipopolysaccharide N-acetylglucosaminyltransferase |          |      |              |       |        |                |        |       |             |        |        |  |
|        | 4                | 9.7%     | 1.000 | 0          | 0.0%     | 0.000 | 2          | 4.2%     | 0.648 | 1            | 2.3%     | 0.982 |                                                                |          |      |              |       |        |                |        |       |             |        |        |  |
| FN0384 | 11               | 12.8%    | 1.000 | 3          | 4.7%     | 1.000 | 3          | 7.9%     | 0.910 | 8            | 14.5%    | 1.000 | AAL94587.1  Hypothetical protein                               |          |      |              |       |        |                |        |       |             |        |        |  |
|        | 12               | 16.3%    | 1.000 | 0          | 0.0%     | 0.000 | 3          | 6.5%     | 1.000 | 8            | 12.8%    | 1.000 |                                                                |          |      |              |       |        |                |        |       |             |        |        |  |
| FN0385 | 1                | 3.9%     | 0.737 | 0          | 0.0%     | 0.000 | 0          | 0.0%     |       | 1            | 3.9%     | 0.605 | AAL94588.1  Hypothetical protein                               |          |      |              |       |        |                |        |       |             |        |        |  |
|        | 0                | 0.0%     | 0.000 | 3          | 9.8%     | 0.999 | 0          | 0.0%     |       | 0            | 0.0%     | 0.000 |                                                                |          |      |              |       |        |                |        |       |             |        |        |  |
| FN0386 | 3                | 12.6%    | 1.000 | 0          | 0.0%     |       | 0          | 0.0%     |       | 1            | 5.9%     | 0.939 | AAL94589.1  Hypothetical protein                               |          |      |              |       |        |                |        |       |             |        |        |  |
|        | 4                | 12.6%    | 1.000 | 0          | 0.0%     |       | 0          | 0.0%     |       | 0            | 0.0%     | 0.000 |                                                                |          |      |              |       |        |                |        |       |             |        |        |  |
| FN0387 | 27               | 22.6%    | 1.000 | 7          | 8.4%     | 1.000 | 5          | 6.1%     | 1.000 | 15           | 9.2%     | 1.000 | AAL94590.1  Fusobacterium outer membrane protein family        |          |      |              |       |        |                |        |       |             |        |        |  |
|        | 23               | 18.4%    | 1.000 | 11         | 9.6%     | 1.000 | 20         | 14.4%    | 1.000 | 19           | 15.6%    | 1.000 |                                                                |          |      |              |       |        |                |        |       |             |        |        |  |
| FN0390 | 9                | 52.6%    | 1.000 | 8          | 31.6%    | 1.000 | 9          | 54.1%    | 1.000 | 12           | 54.1%    | 1.000 | AAL94593.1  Hypothetical protein                               |          |      |              |       |        |                |        |       |             |        |        |  |
|        | 8                | 36.8%    | 1.000 | 12         | 60.9%    | 1.000 | 10         | 60.9%    | 1.000 | 11           | 60.9%    | 1.000 |                                                                |          |      |              |       |        |                |        |       |             |        |        |  |
| FN0391 | 9                | 37.5%    | 1.000 | 4          | 22.5%    | 1.000 | 9          | 36.0%    | 1.000 | 8            | 31.8%    | 1.000 | AAL94594.1  Hydrolase (HAD superfamily)                        |          |      |              |       |        |                |        |       |             |        |        |  |
|        | 8                | 37.5%    | 1.000 | 12         | 32.6%    | 1.000 | 10         | 39.7%    | 1.000 | 9            | 39.3%    | 1.000 |                                                                |          |      |              |       |        |                |        |       |             |        |        |  |

Show detected proteins only  
 Show all proteins  
 Filter by category:

Proteins found:  
 1424

Enter (or paste) list of ORFs

| ORF    | Fn Summary Table |          |       | FnPg vs Fn |          |       | FnSg vs Fn |          |       | FnPgSg vs Fn |          |       | FnPgSg vs FnPg                                                               |          |      | FnSg vs FnPg |       |        | FnPgSg vs FnSg |        |       | Fn Coverage |        |        |  |
|--------|------------------|----------|-------|------------|----------|-------|------------|----------|-------|--------------|----------|-------|------------------------------------------------------------------------------|----------|------|--------------|-------|--------|----------------|--------|-------|-------------|--------|--------|--|
|        | Fn               |          |       | FnPg       |          |       | FnSg       |          |       | FnPgSg       |          |       | Description                                                                  |          |      |              | Fn    |        | FnPg           |        | FnSg  |             | FnPgSg |        |  |
|        | n                | coverage | prob  | n          | coverage | prob  | n          | coverage | prob  | n            | coverage | prob  | n                                                                            | coverage | prob | Description  | Rep I | Rep II | Rep I          | Rep II | Rep I | Rep II      | Rep I  | Rep II |  |
| FN0392 | 9                | 23.2%    | 1.000 | 1          | 4.4%     | 0.669 | 5          | 23.9%    | 1.000 | 5            | 14.1%    | 1.000 | AAL94595.1  Oxygen-independent coproporphyrinogen III oxidase                |          |      |              |       |        |                |        |       |             |        |        |  |
|        | 8                | 21.5%    | 1.000 | 4          | 16.5%    | 1.000 | 3          | 7.1%     | 0.998 | 6            | 12.1%    | 1.000 |                                                                              |          |      |              |       |        |                |        |       |             |        |        |  |
| FN0393 | 4                | 8.5%     | 1.000 | 6          | 18.2%    | 1.000 | 14         | 25.3%    | 1.000 | 3            | 7.2%     | 0.997 | AAL94596.1  Polysaccharide deacetylase                                       |          |      |              |       |        |                |        |       |             |        |        |  |
|        | 5                | 12.9%    | 1.000 | 11         | 23.9%    | 1.000 | 14         | 31.4%    | 1.000 | 3            | 7.7%     | 0.999 |                                                                              |          |      |              |       |        |                |        |       |             |        |        |  |
| FN0394 | 7                | 30.5%    | 1.000 | 3          | 19.5%    | 0.999 | 4          | 22.4%    | 1.000 | 3            | 13.4%    | 1.000 | AAL94597.1  Outer membrane protein                                           |          |      |              |       |        |                |        |       |             |        |        |  |
|        | 5                | 20.7%    | 1.000 | 10         | 39.0%    | 1.000 | 2          | 9.3%     | 0.861 | 2            | 7.7%     | 0.559 |                                                                              |          |      |              |       |        |                |        |       |             |        |        |  |
| FN0396 | 58               | 74.2%    | 1.000 | 52         | 69.5%    | 1.000 | 68         | 83.6%    | 1.000 | 57           | 77.9%    | 1.000 | AAL94599.1  Dipeptide-binding protein                                        |          |      |              |       |        |                |        |       |             |        |        |  |
|        | 59               | 74.2%    | 1.000 | 61         | 79.1%    | 1.000 | 60         | 78.7%    | 1.000 | 59           | 77.7%    | 1.000 |                                                                              |          |      |              |       |        |                |        |       |             |        |        |  |
| FN0397 | 6                | 23.4%    | 1.000 | 1          | 4.2%     | 0.984 | 8          | 26.6%    | 1.000 | 6            | 12.0%    | 1.000 | AAL94600.1  Dipeptide transport system permease protein dppB                 |          |      |              |       |        |                |        |       |             |        |        |  |
|        | 5                | 12.0%    | 1.000 | 5          | 12.7%    | 1.000 | 4          | 12.0%    | 1.000 | 7            | 14.9%    | 1.000 |                                                                              |          |      |              |       |        |                |        |       |             |        |        |  |
| FN0398 | 7                | 9.3%     | 1.000 | 6          | 8.7%     | 1.000 | 8          | 20.1%    | 1.000 | 8            | 23.9%    | 1.000 | AAL94601.1  Dipeptide transport system permease protein dppC                 |          |      |              |       |        |                |        |       |             |        |        |  |
|        | 7                | 9.3%     | 1.000 | 7          | 14.2%    | 1.000 | 7          | 8.7%     | 1.000 | 7            | 10.0%    | 1.000 |                                                                              |          |      |              |       |        |                |        |       |             |        |        |  |
| FN0399 | 14               | 45.4%    | 1.000 | 17         | 54.9%    | 1.000 | 20         | 54.9%    | 1.000 | 21           | 64.8%    | 1.000 | AAL94602.1  Dipeptide transport ATP-binding protein dppD                     |          |      |              |       |        |                |        |       |             |        |        |  |
|        | 15               | 45.4%    | 1.000 | 21         | 63.3%    | 1.000 | 21         | 63.3%    | 1.000 | 22           | 51.0%    | 1.000 |                                                                              |          |      |              |       |        |                |        |       |             |        |        |  |
| FN0400 | 34               | 61.2%    | 1.000 | 29         | 61.9%    | 1.000 | 35         | 73.4%    | 1.000 | 31           | 68.1%    | 1.000 | AAL94603.1  Dipeptide transport ATP-binding protein dppF                     |          |      |              |       |        |                |        |       |             |        |        |  |
|        | 33               | 57.5%    | 1.000 | 38         | 72.5%    | 1.000 | 33         | 70.9%    | 1.000 | 26           | 60.6%    | 1.000 |                                                                              |          |      |              |       |        |                |        |       |             |        |        |  |
| FN0405 | 20               | 60.6%    | 1.000 | 12         | 42.5%    | 1.000 | 11         | 42.8%    | 1.000 | 22           | 66.8%    | 1.000 | AAL94608.1  Tryptophanyl-tRNA synthetase                                     |          |      |              |       |        |                |        |       |             |        |        |  |
|        | 16               | 45.5%    | 1.000 | 17         | 58.5%    | 1.000 | 11         | 42.5%    | 1.000 | 18           | 55.7%    | 1.000 |                                                                              |          |      |              |       |        |                |        |       |             |        |        |  |
| FN0406 | 10               | 30.2%    | 1.000 | 8          | 27.7%    | 1.000 | 7          | 30.2%    | 1.000 | 14           | 47.7%    | 1.000 | AAL94609.1  Alanine racemase, biosynthetic                                   |          |      |              |       |        |                |        |       |             |        |        |  |
|        | 14               | 36.7%    | 1.000 | 8          | 25.4%    | 1.000 | 11         | 36.7%    | 1.000 | 8            | 27.1%    | 1.000 |                                                                              |          |      |              |       |        |                |        |       |             |        |        |  |
| FN0407 | 12               | 42.5%    | 1.000 | 2          | 21.3%    | 0.994 | 7          | 44.3%    | 1.000 | 10           | 48.3%    | 1.000 | AAL94610.1  Hypothetical protein                                             |          |      |              |       |        |                |        |       |             |        |        |  |
|        | 11               | 42.5%    | 1.000 | 6          | 36.2%    | 1.000 | 6          | 39.7%    | 1.000 | 10           | 44.3%    | 1.000 |                                                                              |          |      |              |       |        |                |        |       |             |        |        |  |
| FN0408 | 15               | 50.7%    | 1.000 | 7          | 24.3%    | 1.000 | 13         | 50.3%    | 1.000 | 13           | 48.4%    | 1.000 | AAL94611.1  Acetyl-coenzyme A carboxylase carboxyl transferase subunit beta  |          |      |              |       |        |                |        |       |             |        |        |  |
|        | 14               | 45.4%    | 1.000 | 13         | 46.7%    | 1.000 | 12         | 44.4%    | 1.000 | 15           | 48.7%    | 1.000 |                                                                              |          |      |              |       |        |                |        |       |             |        |        |  |
| FN0409 | 32               | 66.5%    | 1.000 | 19         | 55.6%    | 1.000 | 27         | 77.6%    | 1.000 | 29           | 61.3%    | 1.000 | AAL94612.1  Acetyl-coenzyme A carboxylase carboxyl transferase subunit alpha |          |      |              |       |        |                |        |       |             |        |        |  |
|        | 32               | 70.3%    | 1.000 | 33         | 79.9%    | 1.000 | 30         | 81.2%    | 1.000 | 32           | 70.0%    | 1.000 |                                                                              |          |      |              |       |        |                |        |       |             |        |        |  |
| FN0410 | 19               | 46.5%    | 1.000 | 14         | 44.4%    | 1.000 | 15         | 53.5%    | 1.000 | 16           | 45.9%    | 1.000 | AAL94613.1  6-phosphofructokinase                                            |          |      |              |       |        |                |        |       |             |        |        |  |
|        | 22               | 54.7%    | 1.000 | 20         | 50.5%    | 1.000 | 14         | 51.7%    | 1.000 | 16           | 44.4%    | 1.000 |                                                                              |          |      |              |       |        |                |        |       |             |        |        |  |
| FN0411 | 2                | 18.4%    | 0.988 | 2          | 18.4%    | 0.995 | 3          | 48.0%    | 1.000 | 1            | 9.2%     | 0.988 | AAL94614.1  putative alpha helix protein                                     |          |      |              |       |        |                |        |       |             |        |        |  |
|        | 3                | 18.4%    | 0.999 | 2          | 18.4%    | 0.992 | 2          | 18.4%    | 0.999 | 1            | 9.2%     | 0.986 |                                                                              |          |      |              |       |        |                |        |       |             |        |        |  |
| FN0412 | 2                | 18.8%    | 0.977 | 2          | 21.8%    | 0.714 | 0          | 0.0%     | 0.000 | 1            | 4.6%     | 0.580 | AAL94615.1  Recombination protein recR                                       |          |      |              |       |        |                |        |       |             |        |        |  |
|        | 3                | 26.4%    | 0.999 | 0          | 0.0%     | 0.000 | 1          | 7.1%     | 0.343 | 2            | 12.2%    | 0.988 |                                                                              |          |      |              |       |        |                |        |       |             |        |        |  |

Show detected proteins only  
 Show all proteins  
 Filter by category:

Proteins found:  
 1424

Enter (or paste) list of ORFs

| ORF    | Fn Summary Table |          |       | FnPg vs Fn |          |       | FnSg vs Fn |          |       | FnPgSg vs Fn |          |       | FnPgSg vs FnPg                                                            |          |      | FnSg vs FnPg |       |        | FnPgSg vs FnSg |        |       | Fn Coverage |        |        |  |
|--------|------------------|----------|-------|------------|----------|-------|------------|----------|-------|--------------|----------|-------|---------------------------------------------------------------------------|----------|------|--------------|-------|--------|----------------|--------|-------|-------------|--------|--------|--|
|        | Fn               |          |       | FnPg       |          |       | FnSg       |          |       | FnPgSg       |          |       | Description                                                               |          |      |              | Fn    |        | FnPg           |        | FnSg  |             | FnPgSg |        |  |
|        | n                | coverage | prob  | n          | coverage | prob  | n          | coverage | prob  | n            | coverage | prob  | n                                                                         | coverage | prob | Description  | Rep I | Rep II | Rep I          | Rep II | Rep I | Rep II      | Rep I  | Rep II |  |
| FN0413 | 3                | 17.3%    | 0.754 | 3          | 23.0%    | 0.999 | 0          | 0.0%     | 0.000 | 3            | 14.8%    | 0.985 | AAL94616.1   unknown                                                      |          |      |              |       |        |                |        |       |             |        |        |  |
|        | 2                | 9.7%     | 0.644 | 3          | 14.8%    | 0.910 | 1          | 9.7%     | 0.896 | 1            | 5.1%     | 0.719 |                                                                           |          |      |              |       |        |                |        |       |             |        |        |  |
| FN0414 | 0                | 0.0%     | 0.000 | 1          | 2.1%     | 0.838 | 1          | 1.3%     | 0.385 | 3            | 4.0%     | 0.905 | AAL94617.1   ATP-dependent helicase HEPA                                  |          |      |              |       |        |                |        |       |             |        |        |  |
|        | 1                | 0.9%     | 0.315 | 1          | 2.5%     | 0.271 | 3          | 2.6%     | 0.872 | 1            | 1.8%     | 0.591 |                                                                           |          |      |              |       |        |                |        |       |             |        |        |  |
| FN0416 | 11               | 20.0%    | 1.000 | 7          | 15.4%    | 1.000 | 1          | 4.0%     | 0.378 | 6            | 14.1%    | 1.000 | AAL94619.1   Type III restriction-modification system methylation subunit |          |      |              |       |        |                |        |       |             |        |        |  |
|        | 11               | 25.0%    | 1.000 | 1          | 2.3%     | 0.432 | 1          | 2.3%     | 0.539 | 5            | 10.3%    | 1.000 |                                                                           |          |      |              |       |        |                |        |       |             |        |        |  |
| FN0417 | 16               | 19.6%    | 1.000 | 5          | 7.8%     | 1.000 | 2          | 3.9%     | 0.930 | 9            | 12.6%    | 1.000 | AAL94620.1   Type III restriction-modification system restriction subunit |          |      |              |       |        |                |        |       |             |        |        |  |
|        | 18               | 22.8%    | 1.000 | 0          | 0.0%     | 0.000 | 5          | 7.6%     | 1.000 | 5            | 5.9%     | 1.000 |                                                                           |          |      |              |       |        |                |        |       |             |        |        |  |
| FN0418 | 2                | 18.1%    | 0.984 | 2          | 15.3%    | 0.986 | 14         | 68.4%    | 1.000 | 3            | 16.9%    | 0.966 | AAL94621.1   Uracil phosphoribosyltransferase                             |          |      |              |       |        |                |        |       |             |        |        |  |
|        | 2                | 16.4%    | 0.989 | 13         | 65.5%    | 1.000 | 13         | 65.5%    | 1.000 | 0            | 0.0%     | 0.000 |                                                                           |          |      |              |       |        |                |        |       |             |        |        |  |
| FN0419 | 4                | 17.4%    | 1.000 | 4          | 25.0%    | 1.000 | 3          | 14.1%    | 0.999 | 3            | 14.1%    | 0.989 | AAL94622.1   Aspartate carbamoyltransferase                               |          |      |              |       |        |                |        |       |             |        |        |  |
|        | 2                | 10.9%    | 0.999 | 7          | 31.9%    | 1.000 | 6          | 36.8%    | 1.000 | 4            | 25.0%    | 1.000 |                                                                           |          |      |              |       |        |                |        |       |             |        |        |  |
| FN0420 | 6                | 15.3%    | 1.000 | 3          | 12.2%    | 1.000 | 12         | 39.1%    | 1.000 | 3            | 5.6%     | 1.000 | AAL94623.1   Dihydroorotase                                               |          |      |              |       |        |                |        |       |             |        |        |  |
|        | 5                | 12.2%    | 1.000 | 13         | 41.6%    | 1.000 | 12         | 38.4%    | 1.000 | 2            | 6.1%     | 0.957 |                                                                           |          |      |              |       |        |                |        |       |             |        |        |  |
| FN0421 | 10               | 43.9%    | 1.000 | 2          | 8.9%     | 0.983 | 11         | 38.8%    | 1.000 | 5            | 20.7%    | 1.000 | AAL94624.1   Carbamoyl-phosphate synthase small chain                     |          |      |              |       |        |                |        |       |             |        |        |  |
|        | 11               | 28.8%    | 1.000 | 14         | 53.4%    | 1.000 | 8          | 31.8%    | 1.000 | 5            | 19.6%    | 1.000 |                                                                           |          |      |              |       |        |                |        |       |             |        |        |  |
| FN0422 | 26               | 30.5%    | 1.000 | 8          | 10.9%    | 1.000 | 37         | 42.1%    | 1.000 | 25           | 31.9%    | 1.000 | AAL94625.1   Carbamoyl-phosphate synthase large chain                     |          |      |              |       |        |                |        |       |             |        |        |  |
|        | 31               | 41.1%    | 1.000 | 33         | 35.7%    | 1.000 | 40         | 40.7%    | 1.000 | 21           | 29.4%    | 1.000 |                                                                           |          |      |              |       |        |                |        |       |             |        |        |  |
| FN0423 | 4                | 18.5%    | 1.000 | 1          | 7.7%     | 0.966 | 10         | 38.2%    | 1.000 | 4            | 16.2%    | 1.000 | AAL94626.1   Dihydroorotate dehydrogenase electron transfer subunit       |          |      |              |       |        |                |        |       |             |        |        |  |
|        | 6                | 32.8%    | 1.000 | 10         | 34.7%    | 1.000 | 11         | 42.1%    | 1.000 | 4            | 12.0%    | 1.000 |                                                                           |          |      |              |       |        |                |        |       |             |        |        |  |
| FN0424 | 3                | 11.5%    | 0.997 | 3          | 20.4%    | 1.000 | 8          | 33.9%    | 1.000 | 3            | 17.1%    | 1.000 | AAL94627.1   Dihydroorotate dehydrogenase                                 |          |      |              |       |        |                |        |       |             |        |        |  |
|        | 3                | 11.5%    | 1.000 | 7          | 31.6%    | 1.000 | 10         | 34.9%    | 1.000 | 2            | 12.5%    | 0.989 |                                                                           |          |      |              |       |        |                |        |       |             |        |        |  |
| FN0426 | 5                | 27.0%    | 1.000 | 5          | 28.7%    | 1.000 | 9          | 50.2%    | 1.000 | 9            | 46.8%    | 1.000 | AAL94629.1   Orotidine 5'-phosphate decarboxylase                         |          |      |              |       |        |                |        |       |             |        |        |  |
|        | 4                | 20.3%    | 1.000 | 16         | 63.7%    | 1.000 | 11         | 54.9%    | 1.000 | 5            | 24.5%    | 1.000 |                                                                           |          |      |              |       |        |                |        |       |             |        |        |  |
| FN0427 | 7                | 37.4%    | 1.000 | 5          | 20.9%    | 1.000 | 7          | 32.2%    | 1.000 | 6            | 33.2%    | 1.000 | AAL94630.1   Orotate phosphoribosyltransferase                            |          |      |              |       |        |                |        |       |             |        |        |  |
|        | 9                | 37.4%    | 1.000 | 12         | 55.5%    | 1.000 | 8          | 33.6%    | 1.000 | 8            | 37.0%    | 1.000 |                                                                           |          |      |              |       |        |                |        |       |             |        |        |  |
| FN0430 | 12               | 57.8%    | 1.000 | 5          | 37.1%    | 1.000 | 8          | 55.2%    | 1.000 | 10           | 53.4%    | 1.000 | AAL94633.1   LSU ribosomal protein L19P                                   |          |      |              |       |        |                |        |       |             |        |        |  |
|        | 12               | 57.8%    | 1.000 | 9          | 55.2%    | 1.000 | 8          | 57.8%    | 1.000 | 9            | 47.4%    | 1.000 |                                                                           |          |      |              |       |        |                |        |       |             |        |        |  |
| FN0435 | 11               | 44.0%    | 1.000 | 7          | 46.5%    | 1.000 | 11         | 55.2%    | 1.000 | 10           | 48.5%    | 1.000 | AAL94634.1   Purine nucleoside phosphorylase                              |          |      |              |       |        |                |        |       |             |        |        |  |
|        | 10               | 44.0%    | 1.000 | 19         | 57.7%    | 1.000 | 12         | 54.8%    | 1.000 | 5            | 28.6%    | 1.000 |                                                                           |          |      |              |       |        |                |        |       |             |        |        |  |
| FN0436 | 7                | 21.4%    | 1.000 | 8          | 19.0%    | 1.000 | 11         | 28.9%    | 1.000 | 5            | 14.9%    | 1.000 | AAL94635.1   regulator of kinase autophosphorylation inhibitor            |          |      |              |       |        |                |        |       |             |        |        |  |
|        | 6                | 21.4%    | 1.000 | 12         | 35.4%    | 1.000 | 15         | 46.7%    | 1.000 | 8            | 21.4%    | 1.000 |                                                                           |          |      |              |       |        |                |        |       |             |        |        |  |

Show detected proteins only  
 Show all proteins  
 Filter by category:

Proteins found:  
 1424

Enter (or paste) list of ORFs

| ORF    | Fn Summary Table |          |       | FnPg vs Fn |          |       | FnSg vs Fn |          |       | FnPgSg vs Fn |          |       | FnPgSg vs FnPg                                                               |          |      | FnSg vs FnPg |       |        | FnPgSg vs FnSg |        |       | Fn Coverage |       |        |        |  |
|--------|------------------|----------|-------|------------|----------|-------|------------|----------|-------|--------------|----------|-------|------------------------------------------------------------------------------|----------|------|--------------|-------|--------|----------------|--------|-------|-------------|-------|--------|--------|--|
|        | Fn               |          |       | FnPg       |          |       | FnSg       |          |       | FnPgSg       |          |       | Description                                                                  |          |      |              |       |        | Fn             |        | FnPg  |             | FnSg  |        | FnPgSg |  |
|        | n                | coverage | prob  | n          | coverage | prob  | n          | coverage | prob  | n            | coverage | prob  | n                                                                            | coverage | prob | Description  | Rep I | Rep II | Rep I          | Rep II | Rep I | Rep II      | Rep I | Rep II |        |  |
| FN0437 | 3                | 17.9%    | 1.000 | 3          | 21.8%    | 1.000 | 7          | 42.7%    | 1.000 | 3            | 17.9%    | 1.000 | AAL94636.1  kinase autophosphorylation inhibitor KipI                        |          |      |              |       |        |                |        |       |             |       |        |        |  |
|        | 3                | 17.9%    | 1.000 | 6          | 32.4%    | 1.000 | 7          | 42.7%    | 1.000 | 4            | 22.9%    | 1.000 |                                                                              |          |      |              |       |        |                |        |       |             |       |        |        |  |
| FN0438 | 2                | 12.4%    | 0.992 | 0          | 0.0%     | 0.000 | 1          | 4.3%     | 0.985 | 1            | 4.3%     | 0.989 | AAL94637.1  transporter protein                                              |          |      |              |       |        |                |        |       |             |       |        |        |  |
|        | 3                | 10.9%    | 1.000 | 2          | 4.3%     | 1.000 | 1          | 4.3%     | 0.985 | 2            | 10.9%    | 0.995 |                                                                              |          |      |              |       |        |                |        |       |             |       |        |        |  |
| FN0439 | 11               | 49.0%    | 1.000 | 5          | 30.0%    | 1.000 | 10         | 48.2%    | 1.000 | 13           | 58.0%    | 1.000 | AAL94638.1  Lactam utilization protein LAMB                                  |          |      |              |       |        |                |        |       |             |       |        |        |  |
|        | 11               | 54.1%    | 1.000 | 20         | 70.4%    | 1.000 | 14         | 63.0%    | 1.000 | 12           | 58.0%    | 1.000 |                                                                              |          |      |              |       |        |                |        |       |             |       |        |        |  |
| FN0445 | 4                | 18.5%    | 1.000 | 1          | 2.7%     | 0.420 | 2          | 8.9%     | 0.881 | 5            | 29.5%    | 1.000 | AAL94641.1  Hypothetical protein                                             |          |      |              |       |        |                |        |       |             |       |        |        |  |
|        | 4                | 14.4%    | 1.000 | 2          | 9.6%     | 0.934 | 4          | 22.3%    | 1.000 | 3            | 12.3%    | 0.995 |                                                                              |          |      |              |       |        |                |        |       |             |       |        |        |  |
| FN0446 | 8                | 7.7%     | 1.000 | 5          | 5.2%     | 1.000 | 6          | 7.8%     | 1.000 | 8            | 10.2%    | 1.000 | AAL94642.1  Hypothetical protein                                             |          |      |              |       |        |                |        |       |             |       |        |        |  |
|        | 6                | 8.2%     | 1.000 | 5          | 6.7%     | 0.999 | 9          | 10.7%    | 1.000 | 4            | 6.9%     | 1.000 |                                                                              |          |      |              |       |        |                |        |       |             |       |        |        |  |
| FN0447 | 4                | 13.8%    | 1.000 | 2          | 3.9%     | 0.992 | 5          | 18.8%    | 1.000 | 3            | 10.2%    | 1.000 | AAL94643.1  NIFS protein                                                     |          |      |              |       |        |                |        |       |             |       |        |        |  |
|        | 3                | 10.2%    | 0.995 | 4          | 13.1%    | 1.000 | 6          | 12.5%    | 1.000 | 2            | 7.3%     | 0.993 |                                                                              |          |      |              |       |        |                |        |       |             |       |        |        |  |
| FN0448 | 1                | 2.5%     | 0.400 | 0          | 0.0%     | 0.000 | 2          | 6.7%     | 0.932 | 2            | 5.1%     | 0.970 | AAL94644.1  DNA-repair protein                                               |          |      |              |       |        |                |        |       |             |       |        |        |  |
|        | 1                | 3.6%     | 0.384 | 0          | 0.0%     | 0.000 | 2          | 5.3%     | 0.779 | 3            | 11.0%    | 0.673 |                                                                              |          |      |              |       |        |                |        |       |             |       |        |        |  |
| FN0450 | 10               | 16.5%    | 1.000 | 8          | 11.9%    | 1.000 | 12         | 18.8%    | 1.000 | 12           | 24.1%    | 1.000 | AAL94646.1  ABC transporter ATP-binding protein                              |          |      |              |       |        |                |        |       |             |       |        |        |  |
|        | 16               | 26.7%    | 1.000 | 12         | 20.6%    | 1.000 | 15         | 23.2%    | 1.000 | 8            | 14.3%    | 1.000 |                                                                              |          |      |              |       |        |                |        |       |             |       |        |        |  |
| FN0451 | 4                | 20.1%    | 1.000 | 2          | 10.4%    | 1.000 | 3          | 17.1%    | 1.000 | 1            | 6.7%     | 0.492 | AAL94647.1  Hypothetical protein                                             |          |      |              |       |        |                |        |       |             |       |        |        |  |
|        | 4                | 25.0%    | 1.000 | 3          | 20.1%    | 0.999 | 5          | 28.7%    | 1.000 | 3            | 15.9%    | 0.998 |                                                                              |          |      |              |       |        |                |        |       |             |       |        |        |  |
| FN0452 | 50               | 54.4%    | 1.000 | 43         | 52.1%    | 1.000 | 27         | 49.9%    | 1.000 | 51           | 62.6%    | 1.000 | AAL94648.1  Glucosamine--fructose-6-phosphate aminotransferase (isomerizing) |          |      |              |       |        |                |        |       |             |       |        |        |  |
|        | 48               | 56.5%    | 1.000 | 28         | 50.2%    | 1.000 | 29         | 45.5%    | 1.000 | 48           | 59.0%    | 1.000 |                                                                              |          |      |              |       |        |                |        |       |             |       |        |        |  |
| FN0453 | 27               | 44.3%    | 1.000 | 30         | 48.3%    | 1.000 | 33         | 52.7%    | 1.000 | 36           | 51.5%    | 1.000 | AAL94649.1  Xaa-Pro aminopeptidase                                           |          |      |              |       |        |                |        |       |             |       |        |        |  |
|        | 25               | 42.0%    | 1.000 | 39         | 54.1%    | 1.000 | 38         | 57.0%    | 1.000 | 37           | 57.0%    | 1.000 |                                                                              |          |      |              |       |        |                |        |       |             |       |        |        |  |
| FN0454 | 21               | 51.9%    | 1.000 | 18         | 47.3%    | 1.000 | 28         | 60.9%    | 1.000 | 19           | 48.1%    | 1.000 | AAL94650.1  Aldehyde dehydrogenase B                                         |          |      |              |       |        |                |        |       |             |       |        |        |  |
|        | 19               | 49.3%    | 1.000 | 29         | 64.8%    | 1.000 | 30         | 71.1%    | 1.000 | 19           | 53.0%    | 1.000 |                                                                              |          |      |              |       |        |                |        |       |             |       |        |        |  |
| FN0455 | 10               | 60.9%    | 1.000 | 13         | 66.5%    | 1.000 | 11         | 62.6%    | 1.000 | 12           | 66.5%    | 1.000 | AAL94651.1  Rubrerythrin                                                     |          |      |              |       |        |                |        |       |             |       |        |        |  |
|        | 9                | 59.2%    | 1.000 | 12         | 66.5%    | 1.000 | 9          | 54.7%    | 1.000 | 13           | 66.5%    | 1.000 |                                                                              |          |      |              |       |        |                |        |       |             |       |        |        |  |
| FN0456 | 14               | 44.2%    | 1.000 | 4          | 12.9%    | 1.000 | 4          | 15.0%    | 1.000 | 11           | 31.3%    | 1.000 | AAL94652.1  Hypothetical cytosolic protein                                   |          |      |              |       |        |                |        |       |             |       |        |        |  |
|        | 16               | 40.5%    | 1.000 | 8          | 23.2%    | 1.000 | 7          | 25.3%    | 1.000 | 11           | 28.9%    | 1.000 |                                                                              |          |      |              |       |        |                |        |       |             |       |        |        |  |
| FN0458 | 3                | 14.2%    | 0.994 | 4          | 16.0%    | 1.000 | 3          | 12.7%    | 0.964 | 1            | 3.3%     | 0.528 | AAL94654.1  Hypothetical Exported Protein                                    |          |      |              |       |        |                |        |       |             |       |        |        |  |
|        | 3                | 13.8%    | 1.000 | 5          | 22.5%    | 1.000 | 5          | 24.7%    | 1.000 | 3            | 13.1%    | 0.999 |                                                                              |          |      |              |       |        |                |        |       |             |       |        |        |  |
| FN0459 | 4                | 20.3%    | 1.000 | 0          | 0.0%     | 0.000 | 2          | 7.0%     | 0.950 | 1            | 2.8%     | 0.343 | AAL94655.1  Hypothetical exported 24-amino acid repeat protein               |          |      |              |       |        |                |        |       |             |       |        |        |  |
|        | 4                | 20.3%    | 1.000 | 2          | 8.0%     | 0.839 | 2          | 8.0%     | 0.994 | 1            | 10.5%    | 0.315 |                                                                              |          |      |              |       |        |                |        |       |             |       |        |        |  |

Show detected proteins only  
 Show all proteins  
 Filter by category:

Proteins found:  
 1424

Enter (or paste) list of ORFs

| ORF    | Fn Summary Table |          |       | FnPg vs Fn |          |       | FnSg vs Fn |          |       | FnPgSg vs Fn |          |       | FnPgSg vs FnPg                                     |          |      | FnSg vs FnPg |       |        | FnPgSg vs FnSg |        |       | Fn Coverage |        |        |  |
|--------|------------------|----------|-------|------------|----------|-------|------------|----------|-------|--------------|----------|-------|----------------------------------------------------|----------|------|--------------|-------|--------|----------------|--------|-------|-------------|--------|--------|--|
|        | Fn               |          |       | FnPg       |          |       | FnSg       |          |       | FnPgSg       |          |       | Description                                        |          |      |              | Fn    |        | FnPg           |        | FnSg  |             | FnPgSg |        |  |
|        | n                | coverage | prob  | n          | coverage | prob  | n          | coverage | prob  | n            | coverage | prob  | n                                                  | coverage | prob | Description  | Rep I | Rep II | Rep I          | Rep II | Rep I | Rep II      | Rep I  | Rep II |  |
| FN0460 | 12               | 48.1%    | 1.000 | 2          | 14.6%    | 0.994 | 5          | 20.5%    | 1.000 | 9            | 28.9%    | 1.000 | AAL94656.1  Delta-aminolevulinic acid dehydratase  |          |      |              |       |        |                |        |       |             |        |        |  |
|        | 12               | 39.8%    | 1.000 | 15         | 50.6%    | 1.000 | 9          | 31.4%    | 1.000 | 9            | 37.3%    | 1.000 |                                                    |          |      |              |       |        |                |        |       |             |        |        |  |
| FN0461 | 17               | 59.1%    | 1.000 | 19         | 63.0%    | 1.000 | 18         | 70.2%    | 1.000 | 18           | 65.7%    | 1.000 | AAL94657.1  Probable sigma(54) modulation protein  |          |      |              |       |        |                |        |       |             |        |        |  |
|        | 21               | 71.3%    | 1.000 | 18         | 72.9%    | 1.000 | 17         | 75.1%    | 1.000 | 19           | 70.2%    | 1.000 |                                                    |          |      |              |       |        |                |        |       |             |        |        |  |
| FN0462 | 15               | 26.3%    | 1.000 | 10         | 14.8%    | 1.000 | 28         | 49.8%    | 1.000 | 9            | 20.7%    | 1.000 | AAL94658.1  DNA mismatch repair protein mutL       |          |      |              |       |        |                |        |       |             |        |        |  |
|        | 15               | 24.9%    | 1.000 | 23         | 41.7%    | 1.000 | 27         | 52.7%    | 1.000 | 7            | 14.2%    | 1.000 |                                                    |          |      |              |       |        |                |        |       |             |        |        |  |
| FN0465 | 20               | 41.2%    | 1.000 | 15         | 35.6%    | 1.000 | 21         | 49.5%    | 1.000 | 20           | 44.4%    | 1.000 | AAL94661.1  Hypothetical protein                   |          |      |              |       |        |                |        |       |             |        |        |  |
|        | 22               | 42.9%    | 1.000 | 18         | 45.9%    | 1.000 | 17         | 45.6%    | 1.000 | 20           | 42.4%    | 1.000 |                                                    |          |      |              |       |        |                |        |       |             |        |        |  |
| FN0466 | 45               | 51.7%    | 1.000 | 45         | 48.1%    | 1.000 | 52         | 64.1%    | 1.000 | 47           | 55.4%    | 1.000 | AAL94662.1  Lysyl-tRNA synthetase                  |          |      |              |       |        |                |        |       |             |        |        |  |
|        | 42               | 48.7%    | 1.000 | 52         | 60.6%    | 1.000 | 48         | 59.0%    | 1.000 | 49           | 56.4%    | 1.000 |                                                    |          |      |              |       |        |                |        |       |             |        |        |  |
| FN0469 | 1                | 10.4%    | 0.981 | 0          | 0.0%     | 0.000 | 1          | 5.0%     | 0.306 | 1            | 4.5%     | 0.979 | AAL94665.1  Copper homeostasis protein cutC        |          |      |              |       |        |                |        |       |             |        |        |  |
|        | 1                | 10.4%    | 0.982 | 0          | 0.0%     | 0.000 | 3          | 15.3%    | 1.000 | 1            | 4.5%     | 0.943 |                                                    |          |      |              |       |        |                |        |       |             |        |        |  |
| FN0470 | 17               | 16.4%    | 1.000 | 13         | 17.6%    | 1.000 | 15         | 16.6%    | 1.000 | 18           | 16.4%    | 1.000 | AAL94666.1  Putative efflux pump component MtrF    |          |      |              |       |        |                |        |       |             |        |        |  |
|        | 16               | 13.7%    | 1.000 | 14         | 16.6%    | 1.000 | 14         | 16.6%    | 1.000 | 18           | 16.4%    | 1.000 |                                                    |          |      |              |       |        |                |        |       |             |        |        |  |
| FN0472 | 13               | 56.3%    | 1.000 | 18         | 61.7%    | 1.000 | 14         | 60.5%    | 1.000 | 18           | 61.7%    | 1.000 | AAL94668.1  Flavodoxin                             |          |      |              |       |        |                |        |       |             |        |        |  |
|        | 16               | 59.9%    | 1.000 | 16         | 60.5%    | 1.000 | 11         | 56.9%    | 1.000 | 15           | 59.9%    | 1.000 |                                                    |          |      |              |       |        |                |        |       |             |        |        |  |
| FN0474 | 1                | 1.5%     | 0.289 | 1          | 1.7%     | 0.654 | 4          | 7.8%     | 0.997 | 0            | 0.0%     | 0.000 | AAL94670.1  Acriflavin resistance protein B        |          |      |              |       |        |                |        |       |             |        |        |  |
|        | 4                | 5.4%     | 1.000 | 2          | 2.0%     | 0.521 | 2          | 4.5%     | 0.808 | 2            | 4.0%     | 0.662 |                                                    |          |      |              |       |        |                |        |       |             |        |        |  |
| FN0475 | 12               | 24.8%    | 1.000 | 1          | 3.7%     | 0.645 | 10         | 27.6%    | 1.000 | 6            | 11.7%    | 1.000 | AAL94671.1  MIAB protein                           |          |      |              |       |        |                |        |       |             |        |        |  |
|        | 12               | 25.5%    | 1.000 | 12         | 25.5%    | 1.000 | 10         | 21.8%    | 1.000 | 8            | 19.8%    | 1.000 |                                                    |          |      |              |       |        |                |        |       |             |        |        |  |
| FN0476 | 16               | 42.1%    | 1.000 | 11         | 31.7%    | 1.000 | 17         | 40.4%    | 1.000 | 16           | 40.4%    | 1.000 | AAL94672.1  Transcription termination factor rho   |          |      |              |       |        |                |        |       |             |        |        |  |
|        | 14               | 39.5%    | 1.000 | 23         | 47.2%    | 1.000 | 19         | 43.3%    | 1.000 | 17           | 43.8%    | 1.000 |                                                    |          |      |              |       |        |                |        |       |             |        |        |  |
| FN0477 | 11               | 39.3%    | 1.000 | 5          | 20.9%    | 1.000 | 7          | 35.8%    | 1.000 | 7            | 27.1%    | 1.000 | AAL94673.1  Cell wall endopeptidase family M23/M37 |          |      |              |       |        |                |        |       |             |        |        |  |
|        | 10               | 39.3%    | 1.000 | 5          | 23.7%    | 1.000 | 15         | 49.2%    | 1.000 | 6            | 27.4%    | 1.000 |                                                    |          |      |              |       |        |                |        |       |             |        |        |  |
| FN0478 | 7                | 27.4%    | 1.000 | 2          | 10.7%    | 0.998 | 9          | 28.2%    | 1.000 | 5            | 20.1%    | 1.000 | AAL94674.1  GcpE protein                           |          |      |              |       |        |                |        |       |             |        |        |  |
|        | 6                | 24.6%    | 1.000 | 13         | 40.1%    | 1.000 | 13         | 37.3%    | 1.000 | 5            | 18.4%    | 1.000 |                                                    |          |      |              |       |        |                |        |       |             |        |        |  |
| FN0479 | 1                | 8.7%     | 0.942 | 1          | 14.8%    | 0.839 | 5          | 37.6%    | 1.000 | 1            | 12.1%    | 0.768 | AAL94675.1  RNA polymerase sigma-E factor          |          |      |              |       |        |                |        |       |             |        |        |  |
|        | 2                | 16.1%    | 0.999 | 2          | 16.1%    | 1.000 | 7          | 42.3%    | 1.000 | 1            | 8.7%     | 0.321 |                                                    |          |      |              |       |        |                |        |       |             |        |        |  |
| FN0480 | 0                | 0.0%     |       | 1          | 18.8%    | 0.508 | 0          | 0.0%     | 0.000 | 0            | 0.0%     |       | AAL94676.1  unknown                                |          |      |              |       |        |                |        |       |             |        |        |  |
|        | 0                | 0.0%     |       | 0          | 0.0%     | 0.000 | 4          | 59.4%    | 1.000 | 0            | 0.0%     |       |                                                    |          |      |              |       |        |                |        |       |             |        |        |  |
| FN0481 | 3                | 20.5%    | 0.906 | 0          | 0.0%     | 0.000 | 3          | 21.2%    | 1.000 | 2            | 13.6%    | 0.993 | AAL94677.1  unknown                                |          |      |              |       |        |                |        |       |             |        |        |  |
|        | 3                | 19.7%    | 0.999 | 5          | 34.1%    | 1.000 | 5          | 27.3%    | 1.000 | 1            | 6.8%     | 0.961 |                                                    |          |      |              |       |        |                |        |       |             |        |        |  |

Show detected proteins only  
 Show all proteins  
 Filter by category:

Proteins found:  
 1424

Enter (or paste) list of ORFs



| ORF    | Fn Summary Table |          |       | FnPg vs Fn |          |       | FnSg vs Fn |          |       | FnPgSg vs Fn |          |       | FnPgSg vs FnPg                                              |          |      | FnSg vs FnPg |       |        | FnPgSg vs FnSg |        |       | Fn Coverage |        |        |  |
|--------|------------------|----------|-------|------------|----------|-------|------------|----------|-------|--------------|----------|-------|-------------------------------------------------------------|----------|------|--------------|-------|--------|----------------|--------|-------|-------------|--------|--------|--|
|        | Fn               |          |       | FnPg       |          |       | FnSg       |          |       | FnPgSg       |          |       | Description                                                 |          |      |              | Fn    |        | FnPg           |        | FnSg  |             | FnPgSg |        |  |
|        | n                | coverage | prob  | n          | coverage | prob  | n          | coverage | prob  | n            | coverage | prob  | n                                                           | coverage | prob | Description  | Rep I | Rep II | Rep I          | Rep II | Rep I | Rep II      | Rep I  | Rep II |  |
| FN0482 | 3                | 48.1%    | 1.000 | 0          | 0.0%     | 0.000 | 2          | 39.5%    | 0.992 | 5            | 39.5%    | 1.000 | AAL94678.1  LSU ribosomal protein L31P                      |          |      |              |       |        |                |        |       |             |        |        |  |
|        | 3                | 48.1%    | 1.000 | 3          | 51.9%    | 0.999 | 1          | 12.3%    | 0.985 | 3            | 12.3%    | 1.000 |                                                             |          |      |              |       |        |                |        |       |             |        |        |  |
| FN0483 | 11               | 51.9%    | 1.000 | 9          | 50.0%    | 1.000 | 14         | 63.1%    | 1.000 | 13           | 57.5%    | 1.000 | AAL94679.1  Uracil phosphoribosyltransferase                |          |      |              |       |        |                |        |       |             |        |        |  |
|        | 11               | 51.9%    | 1.000 | 22         | 74.8%    | 1.000 | 9          | 45.8%    | 1.000 | 16           | 61.7%    | 1.000 |                                                             |          |      |              |       |        |                |        |       |             |        |        |  |
| FN0484 | 4                | 22.9%    | 1.000 | 0          | 0.0%     | 0.000 | 3          | 12.1%    | 0.996 | 3            | 9.6%     | 0.999 | AAL94680.1  Lipase                                          |          |      |              |       |        |                |        |       |             |        |        |  |
|        | 2                | 7.5%     | 0.931 | 3          | 13.8%    | 0.998 | 1          | 3.8%     | 0.962 | 2            | 3.8%     | 0.999 |                                                             |          |      |              |       |        |                |        |       |             |        |        |  |
| FN0487 | 52               | 71.3%    | 1.000 | 41         | 59.8%    | 1.000 | 39         | 70.7%    | 1.000 | 50           | 64.8%    | 1.000 | AAL94683.1  2-hydroxyglutarate dehydrogenase                |          |      |              |       |        |                |        |       |             |        |        |  |
|        | 53               | 69.2%    | 1.000 | 40         | 68.0%    | 1.000 | 38         | 74.0%    | 1.000 | 51           | 63.0%    | 1.000 |                                                             |          |      |              |       |        |                |        |       |             |        |        |  |
| FN0488 | 56               | 61.5%    | 1.000 | 45         | 66.7%    | 1.000 | 52         | 72.9%    | 1.000 | 49           | 66.7%    | 1.000 | AAL94684.1  NAD-specific glutamate dehydrogenase            |          |      |              |       |        |                |        |       |             |        |        |  |
|        | 52               | 59.5%    | 1.000 | 60         | 81.3%    | 1.000 | 56         | 76.5%    | 1.000 | 50           | 68.3%    | 1.000 |                                                             |          |      |              |       |        |                |        |       |             |        |        |  |
| FN0489 | 4                | 17.4%    | 1.000 | 1          | 9.4%     | 0.984 | 2          | 17.0%    | 1.000 | 3            | 17.0%    | 1.000 | AAL94685.1  Prolipoprotein diacylglyceryl transferase       |          |      |              |       |        |                |        |       |             |        |        |  |
|        | 4                | 17.4%    | 1.000 | 3          | 17.0%    | 1.000 | 3          | 17.0%    | 1.000 | 3            | 17.0%    | 1.000 |                                                             |          |      |              |       |        |                |        |       |             |        |        |  |
| FN0490 | 2                | 3.8%     | 0.999 | 0          | 0.0%     | 0.000 | 0          | 0.0%     |       | 0            | 0.0%     | 0.000 | AAL94686.1  Integral membrane protein                       |          |      |              |       |        |                |        |       |             |        |        |  |
|        | 3                | 3.8%     | 1.000 | 2          | 13.5%    | 0.495 | 0          | 0.0%     |       | 1            | 3.5%     | 0.986 |                                                             |          |      |              |       |        |                |        |       |             |        |        |  |
| FN0491 | 14               | 29.2%    | 1.000 | 13         | 33.4%    | 1.000 | 21         | 56.3%    | 1.000 | 13           | 28.4%    | 1.000 | AAL94687.1  Alanine racemase                                |          |      |              |       |        |                |        |       |             |        |        |  |
|        | 9                | 19.5%    | 1.000 | 23         | 50.4%    | 1.000 | 22         | 59.9%    | 1.000 | 13           | 33.4%    | 1.000 |                                                             |          |      |              |       |        |                |        |       |             |        |        |  |
| FN0493 | 6                | 13.3%    | 1.000 | 6          | 16.5%    | 1.000 | 6          | 16.5%    | 1.000 | 4            | 20.7%    | 1.000 | AAL94689.1  Hypothetical protein                            |          |      |              |       |        |                |        |       |             |        |        |  |
|        | 7                | 23.6%    | 1.000 | 4          | 11.0%    | 1.000 | 5          | 13.6%    | 1.000 | 3            | 10.7%    | 0.985 |                                                             |          |      |              |       |        |                |        |       |             |        |        |  |
| FN0494 | 19               | 56.0%    | 1.000 | 9          | 36.2%    | 1.000 | 13         | 55.6%    | 1.000 | 17           | 53.1%    | 1.000 | AAL94690.1  Short chain dehydrogenase                       |          |      |              |       |        |                |        |       |             |        |        |  |
|        | 16               | 56.0%    | 1.000 | 14         | 57.6%    | 1.000 | 10         | 53.1%    | 1.000 | 17           | 56.0%    | 1.000 |                                                             |          |      |              |       |        |                |        |       |             |        |        |  |
| FN0495 | 55               | 84.1%    | 1.000 | 59         | 85.6%    | 1.000 | 56         | 90.3%    | 1.000 | 58           | 88.8%    | 1.000 | AAL94691.1  Acetyl-CoA acetyltransferase                    |          |      |              |       |        |                |        |       |             |        |        |  |
|        | 56               | 85.1%    | 1.000 | 62         | 93.5%    | 1.000 | 59         | 92.8%    | 1.000 | 58           | 88.8%    | 1.000 |                                                             |          |      |              |       |        |                |        |       |             |        |        |  |
| FN0496 | 2                | 26.0%    | 0.999 | 2          | 37.0%    | 0.989 | 0          | 0.0%     |       | 0            | 0.0%     |       | AAL94692.1  unknown                                         |          |      |              |       |        |                |        |       |             |        |        |  |
|        | 4                | 42.5%    | 1.000 | 1          | 16.4%    | 0.982 | 0          | 0.0%     |       | 0            | 0.0%     |       |                                                             |          |      |              |       |        |                |        |       |             |        |        |  |
| FN0497 | 1                | 12.2%    | 0.483 | 0          | 0.0%     |       | 0          | 0.0%     | 0.000 | 2            | 27.8%    | 0.940 | AAL94693.1  Plasmid addiction system poison protein         |          |      |              |       |        |                |        |       |             |        |        |  |
|        | 1                | 12.2%    | 0.860 | 0          | 0.0%     |       | 1          | 12.2%    | 0.665 | 3            | 27.8%    | 0.993 |                                                             |          |      |              |       |        |                |        |       |             |        |        |  |
| FN0501 | 33               | 47.0%    | 1.000 | 31         | 44.6%    | 1.000 | 50         | 57.0%    | 1.000 | 29           | 42.0%    | 1.000 | AAL94697.1  Ornithine decarboxylase                         |          |      |              |       |        |                |        |       |             |        |        |  |
|        | 35               | 46.0%    | 1.000 | 51         | 57.1%    | 1.000 | 49         | 61.7%    | 1.000 | 29           | 42.8%    | 1.000 |                                                             |          |      |              |       |        |                |        |       |             |        |        |  |
| FN0502 | 3                | 21.6%    | 0.996 | 2          | 18.0%    | 0.997 | 2          | 18.0%    | 0.999 | 8            | 40.7%    | 1.000 | AAL94698.1  Phosphoheptose isomerase                        |          |      |              |       |        |                |        |       |             |        |        |  |
|        | 3                | 21.6%    | 1.000 | 8          | 52.6%    | 1.000 | 4          | 37.1%    | 1.000 | 7            | 31.4%    | 1.000 |                                                             |          |      |              |       |        |                |        |       |             |        |        |  |
| FN0503 | 12               | 41.4%    | 1.000 | 6          | 29.8%    | 1.000 | 11         | 46.4%    | 1.000 | 11           | 41.7%    | 1.000 | AAL94699.1  Transcriptional regulatory protein, LYSR family |          |      |              |       |        |                |        |       |             |        |        |  |
|        | 12               | 38.7%    | 1.000 | 10         | 40.7%    | 1.000 | 13         | 49.0%    | 1.000 | 10           | 39.1%    | 1.000 |                                                             |          |      |              |       |        |                |        |       |             |        |        |  |

Show detected proteins only  
 Show all proteins  
 Filter by category:

Proteins found:  
 1424

Enter (or paste) list of ORFs

|        | Fn Summary Table |          |       | FnPg vs Fn |          |       | FnSg vs Fn |          |       | FnPgSg vs Fn |          |       | FnPgSg vs FnPg                                                 |       |        | FnSg vs FnPg |        |       | FnPgSg vs FnSg |        |        | Fn Coverage |  |  |  |
|--------|------------------|----------|-------|------------|----------|-------|------------|----------|-------|--------------|----------|-------|----------------------------------------------------------------|-------|--------|--------------|--------|-------|----------------|--------|--------|-------------|--|--|--|
| ORF    | Fn               |          |       | FnPg       |          |       | FnSg       |          |       | FnPgSg       |          |       | Description                                                    | Fn    |        | FnPg         |        | FnSg  |                | FnPgSg |        |             |  |  |  |
|        | n                | coverage | prob  | n          | coverage | prob  | n          | coverage | prob  | n            | coverage | prob  |                                                                | Rep I | Rep II | Rep I        | Rep II | Rep I | Rep II         | Rep I  | Rep II |             |  |  |  |
| FN0504 | 2                | 8.6%     | 0.986 | 1          | 3.8%     | 0.436 | 0          | 0.0%     |       | 1            | 2.2%     | 0.989 | AAL94700.1  Arginine permease                                  |       |        |              |        |       |                |        |        |             |  |  |  |
|        | 2                | 5.5%     | 0.937 | 1          | 7.1%     | 0.819 | 0          | 0.0%     |       | 3            | 5.5%     | 0.900 |                                                                |       |        |              |        |       |                |        |        |             |  |  |  |
| FN0505 | 10               | 49.0%    | 1.000 | 7          | 30.5%    | 1.000 | 4          | 22.6%    | 1.000 | 11           | 58.0%    | 1.000 | AAL94701.1  Anthranilate synthase component II                 |       |        |              |        |       |                |        |        |             |  |  |  |
|        | 10               | 58.0%    | 1.000 | 14         | 64.6%    | 1.000 | 10         | 55.1%    | 1.000 | 8            | 39.9%    | 1.000 |                                                                |       |        |              |        |       |                |        |        |             |  |  |  |
| FN0506 | 38               | 57.5%    | 1.000 | 19         | 32.3%    | 1.000 | 20         | 37.6%    | 1.000 | 37           | 62.6%    | 1.000 | AAL94702.1  Arginyl-tRNA synthetase                            |       |        |              |        |       |                |        |        |             |  |  |  |
|        | 32               | 54.5%    | 1.000 | 33         | 47.8%    | 1.000 | 27         | 50.4%    | 1.000 | 34           | 56.6%    | 1.000 |                                                                |       |        |              |        |       |                |        |        |             |  |  |  |
| FN0511 | 13               | 48.4%    | 1.000 | 6          | 27.2%    | 1.000 | 16         | 52.8%    | 1.000 | 7            | 24.5%    | 1.000 | AAL94707.1  D-lactate dehydrogenase                            |       |        |              |        |       |                |        |        |             |  |  |  |
|        | 12               | 45.4%    | 1.000 | 19         | 53.1%    | 1.000 | 18         | 54.0%    | 1.000 | 8            | 28.1%    | 1.000 |                                                                |       |        |              |        |       |                |        |        |             |  |  |  |
| FN0512 | 23               | 59.8%    | 1.000 | 26         | 49.9%    | 1.000 | 30         | 59.6%    | 1.000 | 24           | 57.3%    | 1.000 | AAL94708.1  Flavoprotein                                       |       |        |              |        |       |                |        |        |             |  |  |  |
|        | 25               | 66.5%    | 1.000 | 31         | 63.8%    | 1.000 | 33         | 59.8%    | 1.000 | 25           | 57.6%    | 1.000 |                                                                |       |        |              |        |       |                |        |        |             |  |  |  |
| FN0513 | 5                | 54.9%    | 1.000 | 4          | 43.7%    | 1.000 | 4          | 34.5%    | 1.000 | 6            | 54.9%    | 1.000 | AAL94709.1  Flavodoxin                                         |       |        |              |        |       |                |        |        |             |  |  |  |
|        | 6                | 54.9%    | 1.000 | 4          | 54.9%    | 1.000 | 5          | 43.7%    | 1.000 | 6            | 54.9%    | 1.000 |                                                                |       |        |              |        |       |                |        |        |             |  |  |  |
| FN0515 | 3                | 4.6%     | 0.991 | 0          | 0.0%     | 0.000 | 3          | 3.0%     | 0.987 | 2            | 1.9%     | 0.982 | AAL94711.1  Acriflavin resistance protein D                    |       |        |              |        |       |                |        |        |             |  |  |  |
|        | 3                | 6.8%     | 0.999 | 3          | 3.9%     | 0.963 | 7          | 9.0%     | 1.000 | 1            | 1.3%     | 0.446 |                                                                |       |        |              |        |       |                |        |        |             |  |  |  |
| FN0516 | 2                | 13.7%    | 0.703 | 2          | 10.4%    | 0.983 | 0          | 0.0%     |       | 1            | 6.7%     | 0.892 | AAL94712.1  Acriflavin resistance protein E                    |       |        |              |        |       |                |        |        |             |  |  |  |
|        | 1                | 3.1%     | 0.408 | 4          | 14.6%    | 0.997 | 0          | 0.0%     |       | 1            | 2.8%     | 0.656 |                                                                |       |        |              |        |       |                |        |        |             |  |  |  |
| FN0517 | 1                | 4.5%     | 0.977 | 1          | 6.9%     | 0.353 | 5          | 18.3%    | 1.000 | 1            | 1.8%     | 0.378 | AAL94713.1  Outer membrane protein tolC                        |       |        |              |        |       |                |        |        |             |  |  |  |
|        | 1                | 2.7%     | 0.921 | 5          | 16.7%    | 1.000 | 4          | 14.3%    | 1.000 | 1            | 2.2%     | 0.300 |                                                                |       |        |              |        |       |                |        |        |             |  |  |  |
| FN0519 | 4                | 9.9%     | 1.000 | 4          | 12.8%    | 1.000 | 6          | 12.5%    | 1.000 | 1            | 4.4%     | 0.722 | AAL94715.1  Hypothetical exported 24-amino acid repeat protein |       |        |              |        |       |                |        |        |             |  |  |  |
|        | 6                | 19.0%    | 1.000 | 5          | 19.5%    | 1.000 | 4          | 14.0%    | 1.000 | 3            | 12.5%    | 1.000 |                                                                |       |        |              |        |       |                |        |        |             |  |  |  |
| FN0522 | 4                | 6.1%     | 1.000 | 2          | 3.9%     | 0.961 | 7          | 11.0%    | 1.000 | 2            | 2.4%     | 0.834 | AAL94718.1  Exonuclease SBCC                                   |       |        |              |        |       |                |        |        |             |  |  |  |
|        | 3                | 2.9%     | 0.991 | 7          | 7.4%     | 1.000 | 10         | 13.1%    | 1.000 | 3            | 2.6%     | 0.930 |                                                                |       |        |              |        |       |                |        |        |             |  |  |  |
| FN0523 | 5                | 23.4%    | 1.000 | 3          | 11.7%    | 0.987 | 3          | 14.1%    | 1.000 | 2            | 12.0%    | 0.638 | AAL94719.1  Exonuclease SBCCD                                  |       |        |              |        |       |                |        |        |             |  |  |  |
|        | 5                | 15.8%    | 1.000 | 0          | 0.0%     | 0.000 | 4          | 14.1%    | 1.000 | 2            | 3.8%     | 1.000 |                                                                |       |        |              |        |       |                |        |        |             |  |  |  |
| FN0524 | 1                | 1.5%     | 0.572 | 4          | 5.8%     | 0.998 | 4          | 6.2%     | 1.000 | 9            | 10.2%    | 1.000 | AAL94720.1  DNA helicase II                                    |       |        |              |        |       |                |        |        |             |  |  |  |
|        | 2                | 2.3%     | 0.980 | 3          | 2.8%     | 0.999 | 10         | 11.4%    | 1.000 | 5            | 5.4%     | 1.000 |                                                                |       |        |              |        |       |                |        |        |             |  |  |  |
| FN0525 | 29               | 41.2%    | 1.000 | 13         | 27.1%    | 1.000 | 35         | 47.9%    | 1.000 | 26           | 41.0%    | 1.000 | AAL94721.1  Penicillin-binding protein                         |       |        |              |        |       |                |        |        |             |  |  |  |
|        | 32               | 44.6%    | 1.000 | 34         | 42.7%    | 1.000 | 30         | 47.5%    | 1.000 | 26           | 39.9%    | 1.000 |                                                                |       |        |              |        |       |                |        |        |             |  |  |  |
| FN0526 | 12               | 36.0%    | 1.000 | 1          | 7.0%     | 0.984 | 9          | 31.8%    | 1.000 | 9            | 33.8%    | 1.000 | AAL94722.1  Florfenicol resistance protein                     |       |        |              |        |       |                |        |        |             |  |  |  |
|        | 9                | 35.2%    | 1.000 | 12         | 43.3%    | 1.000 | 11         | 35.2%    | 1.000 | 6            | 28.2%    | 1.000 |                                                                |       |        |              |        |       |                |        |        |             |  |  |  |
| FN0527 | 11               | 32.7%    | 1.000 | 9          | 31.4%    | 1.000 | 12         | 43.7%    | 1.000 | 9            | 25.7%    | 1.000 | AAL94723.1  Alanyl-tRNA synthetase                             |       |        |              |        |       |                |        |        |             |  |  |  |
|        | 9                | 25.5%    | 1.000 | 15         | 48.3%    | 1.000 | 17         | 52.5%    | 1.000 | 4            | 8.6%     | 1.000 |                                                                |       |        |              |        |       |                |        |        |             |  |  |  |

Show detected proteins only  
 Show all proteins  
 Filter by category:

Proteins found:  
 1424

Enter (or paste) list of ORFs

| ORF    | Fn Summary Table |          |       | FnPg vs Fn |          |       | FnSg vs Fn |          |       | FnPgSg vs Fn |          |       | FnPgSg vs FnPg                                                |          |      | FnSg vs FnPg |       |        | FnPgSg vs FnSg |        |       | Fn Coverage |        |        |  |
|--------|------------------|----------|-------|------------|----------|-------|------------|----------|-------|--------------|----------|-------|---------------------------------------------------------------|----------|------|--------------|-------|--------|----------------|--------|-------|-------------|--------|--------|--|
|        | Fn               |          |       | FnPg       |          |       | FnSg       |          |       | FnPgSg       |          |       | Description                                                   |          |      |              | Fn    |        | FnPg           |        | FnSg  |             | FnPgSg |        |  |
|        | n                | coverage | prob  | n          | coverage | prob  | n          | coverage | prob  | n            | coverage | prob  | n                                                             | coverage | prob | Description  | Rep I | Rep II | Rep I          | Rep II | Rep I | Rep II      | Rep I  | Rep II |  |
| FN0528 | 13               | 78.9%    | 1.000 | 8          | 76.1%    | 1.000 | 4          | 70.4%    | 1.000 | 14           | 78.9%    | 1.000 | AAL94724.1  Cold shock protein                                |          |      |              |       |        |                |        |       |             |        |        |  |
|        | 13               | 78.9%    | 1.000 | 5          | 70.4%    | 1.000 | 5          | 70.4%    | 1.000 | 14           | 78.9%    | 1.000 |                                                               |          |      |              |       |        |                |        |       |             |        |        |  |
| FN0535 | 5                | 25.0%    | 1.000 | 5          | 19.3%    | 1.000 | 6          | 25.0%    | 1.000 | 6            | 25.0%    | 1.000 | AAL94731.1  Hypothetical protein                              |          |      |              |       |        |                |        |       |             |        |        |  |
|        | 9                | 42.2%    | 1.000 | 7          | 30.2%    | 1.000 | 5          | 25.0%    | 1.000 | 8            | 37.0%    | 1.000 |                                                               |          |      |              |       |        |                |        |       |             |        |        |  |
| FN0536 | 28               | 63.8%    | 1.000 | 24         | 53.0%    | 1.000 | 21         | 53.8%    | 1.000 | 25           | 61.2%    | 1.000 | AAL94732.1  DNA polymerase III, beta chain                    |          |      |              |       |        |                |        |       |             |        |        |  |
|        | 28               | 60.4%    | 1.000 | 30         | 65.6%    | 1.000 | 24         | 56.2%    | 1.000 | 27           | 65.9%    | 1.000 |                                                               |          |      |              |       |        |                |        |       |             |        |        |  |
| FN0540 | 15               | 39.6%    | 1.000 | 9          | 28.8%    | 1.000 | 12         | 34.3%    | 1.000 | 16           | 46.8%    | 1.000 | AAL94736.1  Glutamate-1-semialdehyde 2,1-aminomutase          |          |      |              |       |        |                |        |       |             |        |        |  |
|        | 15               | 41.2%    | 1.000 | 17         | 53.0%    | 1.000 | 19         | 52.8%    | 1.000 | 13           | 37.6%    | 1.000 |                                                               |          |      |              |       |        |                |        |       |             |        |        |  |
| FN0541 | 5                | 12.3%    | 1.000 | 2          | 12.8%    | 0.988 | 6          | 16.5%    | 1.000 | 2            | 2.8%     | 0.997 | AAL94737.1  polysaccharide deacetylase                        |          |      |              |       |        |                |        |       |             |        |        |  |
|        | 7                | 15.1%    | 1.000 | 1          | 2.6%     | 0.914 | 7          | 22.5%    | 1.000 | 2            | 6.8%     | 0.985 |                                                               |          |      |              |       |        |                |        |       |             |        |        |  |
| FN0542 | 4                | 20.9%    | 1.000 | 3          | 19.0%    | 1.000 | 8          | 33.5%    | 1.000 | 5            | 26.6%    | 1.000 | AAL94738.1  Beta 1,4 glucosyltransferase                      |          |      |              |       |        |                |        |       |             |        |        |  |
|        | 4                | 21.7%    | 1.000 | 10         | 47.5%    | 1.000 | 8          | 32.3%    | 1.000 | 2            | 8.4%     | 1.000 |                                                               |          |      |              |       |        |                |        |       |             |        |        |  |
| FN0543 | 14               | 38.8%    | 1.000 | 5          | 21.4%    | 1.000 | 6          | 26.7%    | 1.000 | 10           | 32.2%    | 1.000 | AAL94739.1  Lipopolysaccharide heptosyltransferase-1          |          |      |              |       |        |                |        |       |             |        |        |  |
|        | 12               | 29.0%    | 1.000 | 12         | 36.8%    | 1.000 | 11         | 37.4%    | 1.000 | 10           | 31.0%    | 1.000 |                                                               |          |      |              |       |        |                |        |       |             |        |        |  |
| FN0544 | 2                | 13.2%    | 0.999 | 1          | 6.4%     | 0.381 | 1          | 2.3%     | 0.428 | 1            | 6.4%     | 0.715 | AAL94740.1  ADP-heptose:LPS heptosyltransferase II            |          |      |              |       |        |                |        |       |             |        |        |  |
|        | 2                | 12.9%    | 0.997 | 3          | 11.4%    | 0.978 | 2          | 8.8%     | 0.989 | 1            | 6.4%     | 0.919 |                                                               |          |      |              |       |        |                |        |       |             |        |        |  |
| FN0546 | 3                | 9.9%     | 0.997 | 1          | 4.2%     | 0.695 | 1          | 3.0%     | 0.288 | 1            | 3.0%     | 0.905 | AAL94742.1  Lipopolysaccharide core biosynthesis protein rfaQ |          |      |              |       |        |                |        |       |             |        |        |  |
|        | 2                | 5.7%     | 0.982 | 5          | 16.1%    | 1.000 | 2          | 6.6%     | 0.822 | 1            | 3.0%     | 0.425 |                                                               |          |      |              |       |        |                |        |       |             |        |        |  |
| FN0547 | 23               | 51.4%    | 1.000 | 15         | 45.7%    | 1.000 | 17         | 50.7%    | 1.000 | 21           | 65.9%    | 1.000 | AAL94743.1  RecA protein                                      |          |      |              |       |        |                |        |       |             |        |        |  |
|        | 23               | 54.9%    | 1.000 | 21         | 56.4%    | 1.000 | 17         | 44.6%    | 1.000 | 22           | 61.2%    | 1.000 |                                                               |          |      |              |       |        |                |        |       |             |        |        |  |
| FN0549 | 2                | 7.6%     | 0.920 | 0          | 0.0%     | 0.000 | 2          | 7.3%     | 0.997 | 2            | 7.6%     | 0.955 | AAL94745.1  O-sialoglycoprotein endopeptidase                 |          |      |              |       |        |                |        |       |             |        |        |  |
|        | 3                | 12.0%    | 0.999 | 2          | 8.5%     | 0.997 | 5          | 17.0%    | 1.000 | 1            | 3.2%     | 0.339 |                                                               |          |      |              |       |        |                |        |       |             |        |        |  |
| FN0550 | 2                | 11.3%    | 0.998 | 7          | 69.5%    | 1.000 | 5          | 31.9%    | 1.000 | 5            | 39.0%    | 1.000 | AAL94746.1  hypothetical Protein                              |          |      |              |       |        |                |        |       |             |        |        |  |
|        | 0                | 0.0%     | 0.000 | 7          | 52.5%    | 1.000 | 6          | 38.3%    | 1.000 | 2            | 25.5%    | 0.982 |                                                               |          |      |              |       |        |                |        |       |             |        |        |  |
| FN0552 | 6                | 30.1%    | 1.000 | 5          | 27.9%    | 1.000 | 8          | 33.1%    | 1.000 | 4            | 14.4%    | 1.000 | AAL94748.1  Serine racemase                                   |          |      |              |       |        |                |        |       |             |        |        |  |
|        | 8                | 39.8%    | 1.000 | 11         | 37.1%    | 1.000 | 11         | 38.8%    | 1.000 | 2            | 5.1%     | 0.994 |                                                               |          |      |              |       |        |                |        |       |             |        |        |  |
| FN0553 | 18               | 41.7%    | 1.000 | 15         | 32.2%    | 1.000 | 29         | 63.7%    | 1.000 | 20           | 40.1%    | 1.000 | AAL94749.1  D-serine dehydratase                              |          |      |              |       |        |                |        |       |             |        |        |  |
|        | 21               | 46.5%    | 1.000 | 37         | 64.6%    | 1.000 | 35         | 62.6%    | 1.000 | 18           | 41.3%    | 1.000 |                                                               |          |      |              |       |        |                |        |       |             |        |        |  |
| FN0554 | 2                | 3.3%     | 0.990 | 3          | 3.6%     | 1.000 | 5          | 12.7%    | 1.000 | 3            | 8.2%     | 0.998 | AAL94750.1  D-serine permease                                 |          |      |              |       |        |                |        |       |             |        |        |  |
|        | 3                | 8.7%     | 0.996 | 4          | 6.7%     | 1.000 | 4          | 6.7%     | 1.000 | 0            | 0.0%     | 0.000 |                                                               |          |      |              |       |        |                |        |       |             |        |        |  |
| FN0555 | 1                | 6.0%     | 0.981 | 0          | 0.0%     | 0.000 | 3          | 20.1%    | 1.000 | 2            | 10.1%    | 0.988 | AAL94751.1  Transcriptional regulator, MerR family            |          |      |              |       |        |                |        |       |             |        |        |  |
|        | 2                | 10.6%    | 0.989 | 1          | 10.1%    | 0.317 | 2          | 8.5%     | 0.960 | 1            | 4.0%     | 0.979 |                                                               |          |      |              |       |        |                |        |       |             |        |        |  |

Show detected proteins only  
 Show all proteins  
 Filter by category:

Proteins found:  
 1424

Enter (or paste) list of ORFs

| ORF    | Fn Summary Table |          |       | FnPg vs Fn |          |       | FnSg vs Fn |          |       | FnPgSg vs Fn |          |       | FnPgSg vs FnPg                                                                     |          |      | FnSg vs FnPg |       |        | FnPgSg vs FnSg |        |       | Fn Coverage |        |        |  |
|--------|------------------|----------|-------|------------|----------|-------|------------|----------|-------|--------------|----------|-------|------------------------------------------------------------------------------------|----------|------|--------------|-------|--------|----------------|--------|-------|-------------|--------|--------|--|
|        | Fn               |          |       | FnPg       |          |       | FnSg       |          |       | FnPgSg       |          |       | Description                                                                        |          |      |              | Fn    |        | FnPg           |        | FnSg  |             | FnPgSg |        |  |
|        | n                | coverage | prob  | n          | coverage | prob  | n          | coverage | prob  | n            | coverage | prob  | n                                                                                  | coverage | prob | Description  | Rep I | Rep II | Rep I          | Rep II | Rep I | Rep II      | Rep I  | Rep II |  |
| FN0556 | 13               | 60.2%    | 1.000 | 10         | 42.2%    | 1.000 | 10         | 55.8%    | 1.000 | 8            | 42.2%    | 1.000 | AAL94752.1  unknown                                                                |          |      |              |       |        |                |        |       |             |        |        |  |
|        | 9                | 39.3%    | 1.000 | 8          | 38.8%    | 1.000 | 10         | 47.6%    | 1.000 | 8            | 35.0%    | 1.000 |                                                                                    |          |      |              |       |        |                |        |       |             |        |        |  |
| FN0557 | 7                | 32.4%    | 1.000 | 8          | 32.8%    | 1.000 | 13         | 53.3%    | 1.000 | 9            | 40.2%    | 1.000 | AAL94753.1  unknown                                                                |          |      |              |       |        |                |        |       |             |        |        |  |
|        | 6                | 31.6%    | 1.000 | 15         | 53.3%    | 1.000 | 10         | 46.3%    | 1.000 | 5            | 28.3%    | 1.000 |                                                                                    |          |      |              |       |        |                |        |       |             |        |        |  |
| FN0558 | 8                | 39.8%    | 1.000 | 1          | 10.2%    | 0.926 | 14         | 63.4%    | 1.000 | 9            | 43.1%    | 1.000 | AAL94754.1  TraT complement resistance protein precursor                           |          |      |              |       |        |                |        |       |             |        |        |  |
|        | 9                | 43.1%    | 1.000 | 13         | 50.5%    | 1.000 | 11         | 56.0%    | 1.000 | 9            | 42.6%    | 1.000 |                                                                                    |          |      |              |       |        |                |        |       |             |        |        |  |
| FN0559 | 26               | 44.7%    | 1.000 | 18         | 41.4%    | 1.000 | 25         | 51.7%    | 1.000 | 18           | 29.1%    | 1.000 | AAL94755.1  Phosphoglucumutase                                                     |          |      |              |       |        |                |        |       |             |        |        |  |
|        | 26               | 43.6%    | 1.000 | 34         | 62.4%    | 1.000 | 29         | 49.0%    | 1.000 | 28           | 50.9%    | 1.000 |                                                                                    |          |      |              |       |        |                |        |       |             |        |        |  |
| FN0560 | 1                | 5.8%     | 0.901 | 0          | 0.0%     |       | 1          | 4.1%     | 0.955 | 2            | 11.0%    | 0.965 | AAL94756.1  Oxygen-independent coproporphyrinogen III oxidase                      |          |      |              |       |        |                |        |       |             |        |        |  |
|        | 1                | 5.8%     | 0.979 | 0          | 0.0%     |       | 4          | 8.8%     | 1.000 | 1            | 2.7%     | 0.969 |                                                                                    |          |      |              |       |        |                |        |       |             |        |        |  |
| FN0561 | 11               | 40.4%    | 1.000 | 9          | 28.7%    | 1.000 | 10         | 42.2%    | 1.000 | 10           | 46.6%    | 1.000 | AAL94757.1  Proline synthetase associated protein                                  |          |      |              |       |        |                |        |       |             |        |        |  |
|        | 11               | 34.5%    | 1.000 | 11         | 39.9%    | 1.000 | 13         | 47.5%    | 1.000 | 11           | 41.7%    | 1.000 |                                                                                    |          |      |              |       |        |                |        |       |             |        |        |  |
| FN0562 | 13               | 75.7%    | 1.000 | 6          | 53.2%    | 1.000 | 12         | 78.4%    | 1.000 | 13           | 76.6%    | 1.000 | AAL94758.1  Hypothetical cytosolic protein                                         |          |      |              |       |        |                |        |       |             |        |        |  |
|        | 10               | 69.4%    | 1.000 | 13         | 81.1%    | 1.000 | 10         | 78.4%    | 1.000 | 14           | 67.6%    | 1.000 |                                                                                    |          |      |              |       |        |                |        |       |             |        |        |  |
| FN0563 | 10               | 29.1%    | 1.000 | 4          | 22.8%    | 1.000 | 4          | 13.5%    | 1.000 | 6            | 18.9%    | 1.000 | AAL94759.1  putative tRNA (5-methylaminomethyl-2-thiouridylate) -methyltransferase |          |      |              |       |        |                |        |       |             |        |        |  |
|        | 9                | 26.1%    | 1.000 | 3          | 16.2%    | 0.996 | 6          | 24.9%    | 1.000 | 4            | 14.1%    | 1.000 |                                                                                    |          |      |              |       |        |                |        |       |             |        |        |  |
| FN0574 | 3                | 6.8%     | 1.000 | 2          | 5.0%     | 0.678 | 0          | 0.0%     | 0.000 | 3            | 5.2%     | 0.982 | AAL94770.1  Hypothetical cytosolic protein                                         |          |      |              |       |        |                |        |       |             |        |        |  |
|        | 0                | 0.0%     | 0.000 | 0          | 0.0%     | 0.000 | 1          | 2.3%     | 0.682 | 0            | 0.0%     | 0.000 |                                                                                    |          |      |              |       |        |                |        |       |             |        |        |  |
| FN0576 | 19               | 48.5%    | 1.000 | 12         | 31.7%    | 1.000 | 22         | 54.2%    | 1.000 | 11           | 30.1%    | 1.000 | AAL94772.1  hypothetical protein                                                   |          |      |              |       |        |                |        |       |             |        |        |  |
|        | 17               | 43.9%    | 1.000 | 14         | 46.3%    | 1.000 | 18         | 51.8%    | 1.000 | 8            | 24.1%    | 1.000 |                                                                                    |          |      |              |       |        |                |        |       |             |        |        |  |
| FN0577 | 2                | 4.6%     | 0.969 | 2          | 4.6%     | 0.999 | 7          | 24.5%    | 1.000 | 1            | 5.4%     | 0.880 | AAL94773.1  Hypothetical protein                                                   |          |      |              |       |        |                |        |       |             |        |        |  |
|        | 3                | 8.7%     | 1.000 | 5          | 23.2%    | 1.000 | 4          | 11.2%    | 1.000 | 1            | 5.4%     | 0.726 |                                                                                    |          |      |              |       |        |                |        |       |             |        |        |  |
| FN0579 | 75               | 47.4%    | 1.000 | 68         | 39.3%    | 1.000 | 103        | 58.1%    | 1.000 | 85           | 52.8%    | 1.000 | AAL94775.1  Hypothetical cytosolic protein                                         |          |      |              |       |        |                |        |       |             |        |        |  |
|        | 76               | 47.1%    | 1.000 | 122        | 68.2%    | 1.000 | 89         | 51.3%    | 1.000 | 81           | 50.9%    | 1.000 |                                                                                    |          |      |              |       |        |                |        |       |             |        |        |  |
| FN0580 | 7                | 10.9%    | 1.000 | 0          | 0.0%     | 0.000 | 4          | 8.3%     | 1.000 | 0            | 0.0%     | 0.000 | AAL94776.1  Penicillin-binding protein                                             |          |      |              |       |        |                |        |       |             |        |        |  |
|        | 7                | 14.8%    | 1.000 | 4          | 7.5%     | 0.990 | 5          | 10.1%    | 1.000 | 1            | 2.6%     | 0.470 |                                                                                    |          |      |              |       |        |                |        |       |             |        |        |  |
| FN0581 | 4                | 8.0%     | 1.000 | 1          | 4.1%     | 0.984 | 5          | 15.2%    | 1.000 | 2            | 7.5%     | 1.000 | AAL94777.1  Lipoprotein releasing system transmembrane protein lolE                |          |      |              |       |        |                |        |       |             |        |        |  |
|        | 5                | 11.6%    | 1.000 | 3          | 9.8%     | 1.000 | 1          | 4.1%     | 0.956 | 3            | 9.5%     | 1.000 |                                                                                    |          |      |              |       |        |                |        |       |             |        |        |  |
| FN0582 | 9                | 42.1%    | 1.000 | 2          | 11.2%    | 0.997 | 10         | 39.1%    | 1.000 | 10           | 40.3%    | 1.000 | AAL94778.1  Lipoprotein releasing system ATP-binding protein lolD                  |          |      |              |       |        |                |        |       |             |        |        |  |
|        | 11               | 43.3%    | 1.000 | 7          | 34.8%    | 1.000 | 11         | 39.1%    | 1.000 | 6            | 34.3%    | 1.000 |                                                                                    |          |      |              |       |        |                |        |       |             |        |        |  |
| FN0583 | 4                | 26.9%    | 1.000 | 1          | 16.6%    | 0.984 | 3          | 22.8%    | 1.000 | 0            | 0.0%     |       | AAL94779.1  Hypothetical Exported Protein                                          |          |      |              |       |        |                |        |       |             |        |        |  |
|        | 2                | 23.4%    | 1.000 | 5          | 27.6%    | 1.000 | 6          | 34.5%    | 1.000 | 0            | 0.0%     |       |                                                                                    |          |      |              |       |        |                |        |       |             |        |        |  |

Show detected proteins only  
 Show all proteins  
 Filter by category:

Proteins found:  
1424

Enter (or paste) list of ORFs

Find ORFs

[Dot Plots](#) [Dot Plots](#)

|        |    | Fn Summary Table |          |      | FnPg vs Fn |          |      | FnSg vs Fn |          |      | FnPgSg vs Fn |          |                                                                           | FnPgSg vs FnPg |      |      | FnSg vs FnPg |       |        | FnPgSg vs FnSg |        |       | Fn Coverage |       |        |
|--------|----|------------------|----------|------|------------|----------|------|------------|----------|------|--------------|----------|---------------------------------------------------------------------------|----------------|------|------|--------------|-------|--------|----------------|--------|-------|-------------|-------|--------|
| ORF    |    | Fn               |          |      | FnPg       |          |      | FnSg       |          |      | FnPgSg       |          |                                                                           | Description    |      |      |              |       |        |                |        |       |             |       |        |
|        |    | n                | coverage | prob | n          | coverage | prob | n          | coverage | prob | n            | coverage | prob                                                                      | Fn             | FnPg | FnSg | FnPgSg       | Rep I | Rep II | Rep I          | Rep II | Rep I | Rep II      | Rep I | Rep II |
| FN0585 | 4  | 22.3%            | 1.000    | 7    | 21.0%      | 1.000    | 5    | 19.2%      | 1.000    | 3    | 32.1%        | 0.994    | AAL94781.1   Two-component response regulator czcR                        |                |      |      |              |       |        |                |        |       |             |       |        |
|        | 5  | 22.3%            | 1.000    | 3    | 22.8%      | 1.000    | 6    | 22.8%      | 1.000    | 2    | 16.5%        | 0.676    |                                                                           |                |      |      |              |       |        |                |        |       |             |       |        |
| FN0586 | 3  | 9.0%             | 0.992    | 1    | 2.9%       | 0.979    | 4    | 14.8%      | 1.000    | 4    | 12.1%        | 0.991    | AAL94782.1   Two-component sensor kinase czcS                             |                |      |      |              |       |        |                |        |       |             |       |        |
|        | 4  | 11.9%            | 1.000    | 4    | 9.0%       | 1.000    | 5    | 12.6%      | 1.000    | 1    | 2.2%         | 0.432    |                                                                           |                |      |      |              |       |        |                |        |       |             |       |        |
| FN0590 | 7  | 23.9%            | 1.000    | 3    | 13.0%      | 1.000    | 12   | 37.2%      | 1.000    | 5    | 17.6%        | 1.000    | AAL94786.1   N-acyl-L-amino acid amidohydrolase                           |                |      |      |              |       |        |                |        |       |             |       |        |
|        | 5  | 25.4%            | 1.000    | 14   | 43.5%      | 1.000    | 16   | 46.6%      | 1.000    | 3    | 8.9%         | 0.998    |                                                                           |                |      |      |              |       |        |                |        |       |             |       |        |
| FN0592 | 31 | 45.6%            | 1.000    | 14   | 18.8%      | 1.000    | 33   | 46.8%      | 1.000    | 24   | 32.4%        | 1.000    | AAL94788.1   ATP-dependent DNA helicase pcrA                              |                |      |      |              |       |        |                |        |       |             |       |        |
|        | 30 | 47.9%            | 1.000    | 28   | 39.3%      | 1.000    | 25   | 34.0%      | 1.000    | 21   | 26.1%        | 1.000    |                                                                           |                |      |      |              |       |        |                |        |       |             |       |        |
| FN0593 | 11 | 29.3%            | 1.000    | 8    | 25.4%      | 1.000    | 13   | 32.9%      | 1.000    | 13   | 36.0%        | 1.000    | AAL94789.1   UDP-3-O-[3-hydroxymyristoyl] N-acetylglucosamine deacetylase |                |      |      |              |       |        |                |        |       |             |       |        |
|        | 14 | 42.0%            | 1.000    | 16   | 42.8%      | 1.000    | 12   | 33.6%      | 1.000    | 16   | 44.5%        | 1.000    |                                                                           |                |      |      |              |       |        |                |        |       |             |       |        |
| FN0594 | 3  | 25.5%            | 1.000    | 1    | 11.3%      | 0.957    | 11   | 42.6%      | 1.000    | 3    | 42.6%        | 1.000    | AAL94790.1   (3R)-hydroxymyristoyl-[acyl carrier protein] dehydratase     |                |      |      |              |       |        |                |        |       |             |       |        |
|        | 2  | 11.3%            | 0.999    | 13   | 43.3%      | 1.000    | 10   | 42.6%      | 1.000    | 1    | 11.3%        | 0.956    |                                                                           |                |      |      |              |       |        |                |        |       |             |       |        |
| FN0595 | 5  | 17.1%            | 1.000    | 2    | 5.4%       | 0.945    | 8    | 22.6%      | 1.000    | 7    | 28.8%        | 1.000    | AAL94791.1   Acyl-[acyl-carrier-protein]-UDP-N-acetylglucosamine O-       |                |      |      |              |       |        |                |        |       |             |       |        |
|        | 8  | 20.6%            | 1.000    | 11   | 31.9%      | 1.000    | 7    | 23.0%      | 1.000    | 7    | 23.7%        | 1.000    |                                                                           |                |      |      |              |       |        |                |        |       |             |       |        |
| FN0596 | 7  | 29.2%            | 1.000    | 4    | 15.7%      | 1.000    | 8    | 28.5%      | 1.000    | 8    | 39.3%        | 1.000    | AAL94792.1   Hypothetical protein                                         |                |      |      |              |       |        |                |        |       |             |       |        |
|        | 9  | 30.0%            | 1.000    | 10   | 40.1%      | 1.000    | 9    | 36.0%      | 1.000    | 2    | 7.9%         | 0.998    |                                                                           |                |      |      |              |       |        |                |        |       |             |       |        |
| FN0597 | 5  | 13.5%            | 1.000    | 7    | 11.8%      | 1.000    | 11   | 21.9%      | 1.000    | 5    | 15.7%        | 1.000    | AAL94793.1   Lipid-A-disaccharide synthase                                |                |      |      |              |       |        |                |        |       |             |       |        |
|        | 7  | 19.1%            | 1.000    | 14   | 35.4%      | 1.000    | 12   | 22.8%      | 1.000    | 5    | 19.7%        | 1.000    |                                                                           |                |      |      |              |       |        |                |        |       |             |       |        |
| FN0598 | 9  | 22.0%            | 1.000    | 3    | 8.1%       | 1.000    | 7    | 15.3%      | 1.000    | 9    | 16.0%        | 1.000    | AAL94794.1   Phospholipid-lipopolysaccharide ABC transporter              |                |      |      |              |       |        |                |        |       |             |       |        |
|        | 8  | 18.5%            | 1.000    | 9    | 20.6%      | 1.000    | 7    | 14.9%      | 1.000    | 11   | 22.1%        | 1.000    |                                                                           |                |      |      |              |       |        |                |        |       |             |       |        |
| FN0600 | 12 | 70.5%            | 1.000    | 6    | 36.7%      | 1.000    | 12   | 54.2%      | 1.000    | 12   | 66.9%        | 1.000    | AAL94796.1   Hypothetical protein                                         |                |      |      |              |       |        |                |        |       |             |       |        |
|        | 12 | 63.9%            | 1.000    | 20   | 80.1%      | 1.000    | 15   | 68.7%      | 1.000    | 13   | 66.9%        | 1.000    |                                                                           |                |      |      |              |       |        |                |        |       |             |       |        |
| FN0601 | 5  | 37.6%            | 1.000    | 0    | 0.0%       | 0.000    | 0    | 0.0%       | 0.000    | 2    | 18.4%        | 0.995    | AAL94797.1   Hypothetical exported 24-amino acid repeat protein           |                |      |      |              |       |        |                |        |       |             |       |        |
|        | 5  | 37.6%            | 1.000    | 0    | 0.0%       | 0.000    | 1    | 12.1%      | 0.975    | 1    | 6.4%         | 0.986    |                                                                           |                |      |      |              |       |        |                |        |       |             |       |        |
| FN0602 | 17 | 52.5%            | 1.000    | 16   | 48.7%      | 1.000    | 16   | 43.6%      | 1.000    | 12   | 40.3%        | 1.000    | AAL94798.1   Hypothetical protein                                         |                |      |      |              |       |        |                |        |       |             |       |        |
|        | 17 | 52.5%            | 1.000    | 18   | 47.9%      | 1.000    | 15   | 38.6%      | 1.000    | 14   | 51.7%        | 1.000    |                                                                           |                |      |      |              |       |        |                |        |       |             |       |        |
| FN0603 | 1  | 4.5%             | 0.967    | 1    | 4.1%       | 0.650    | 6    | 22.3%      | 1.000    | 1    | 3.5%         | 0.348    | AAL94799.1   Transcriptional regulatory protein, LYSR family              |                |      |      |              |       |        |                |        |       |             |       |        |
|        | 3  | 8.0%             | 0.999    | 7    | 20.7%      | 1.000    | 8    | 29.0%      | 1.000    | 0    | 0.0%         | 0.000    |                                                                           |                |      |      |              |       |        |                |        |       |             |       |        |
| FN0605 | 0  | 0.0%             |          | 1    | 6.7%       | 0.984    | 0    | 0.0%       | 0.000    | 1    | 3.0%         | 0.342    | AAL94801.1   Aspartate aminotransferase                                   |                |      |      |              |       |        |                |        |       |             |       |        |
|        | 0  | 0.0%             |          | 2    | 8.7%       | 0.490    | 1    | 6.7%       | 0.980    | 3    | 6.0%         | 0.979    |                                                                           |                |      |      |              |       |        |                |        |       |             |       |        |
| FN0608 | 17 | 26.6%            | 1.000    | 19   | 28.9%      | 1.000    | 26   | 41.7%      | 1.000    | 18   | 26.1%        | 1.000    | AAL94804.1   Exoribonuclease II                                           |                |      |      |              |       |        |                |        |       |             |       |        |
|        | 16 | 25.4%            | 1.000    | 33   | 44.7%      | 1.000    | 32   | 43.7%      | 1.000    | 19   | 30.3%        | 1.000    |                                                                           |                |      |      |              |       |        |                |        |       |             |       |        |

Show detected proteins only  
 Show all proteins  
 Filter by category:

Proteins found:  
 1424

Enter (or paste) list of ORFs

| ORF    | Fn Summary Table |          |       | FnPg vs Fn |          |       | FnSg vs Fn |          |       | FnPgSg vs Fn |          |       | FnPgSg vs FnPg                                                               |          |      | FnSg vs FnPg |       |        | FnPgSg vs FnSg |        |       | Fn Coverage |        |        |  |
|--------|------------------|----------|-------|------------|----------|-------|------------|----------|-------|--------------|----------|-------|------------------------------------------------------------------------------|----------|------|--------------|-------|--------|----------------|--------|-------|-------------|--------|--------|--|
|        | Fn               |          |       | FnPg       |          |       | FnSg       |          |       | FnPgSg       |          |       | Description                                                                  |          |      |              | Fn    |        | FnPg           |        | FnSg  |             | FnPgSg |        |  |
|        | n                | coverage | prob  | n          | coverage | prob  | n          | coverage | prob  | n            | coverage | prob  | n                                                                            | coverage | prob | Description  | Rep I | Rep II | Rep I          | Rep II | Rep I | Rep II      | Rep I  | Rep II |  |
| FN0609 | 2                | 15.5%    | 0.996 | 0          | 0.0%     | 0.000 | 2          | 15.5%    | 0.991 | 2            | 15.5%    | 0.994 | AAL94805.1  Small protein B                                                  |          |      |              |       |        |                |        |       |             |        |        |  |
|        | 1                | 6.8%     | 0.957 | 3          | 15.5%    | 1.000 | 3          | 15.5%    | 0.999 | 0            | 0.0%     | 0.000 |                                                                              |          |      |              |       |        |                |        |       |             |        |        |  |
| FN0610 | 50               | 45.3%    | 1.000 | 21         | 19.0%    | 1.000 | 48         | 44.7%    | 1.000 | 42           | 40.6%    | 1.000 | AAL94806.1  unknown                                                          |          |      |              |       |        |                |        |       |             |        |        |  |
|        | 54               | 49.7%    | 1.000 | 67         | 52.3%    | 1.000 | 49         | 44.6%    | 1.000 | 43           | 43.3%    | 1.000 |                                                                              |          |      |              |       |        |                |        |       |             |        |        |  |
| FN0611 | 36               | 60.8%    | 1.000 | 32         | 54.4%    | 1.000 | 47         | 68.1%    | 1.000 | 32           | 48.9%    | 1.000 | AAL94807.1  Threonyl-tRNA synthetase                                         |          |      |              |       |        |                |        |       |             |        |        |  |
|        | 39               | 60.8%    | 1.000 | 45         | 64.2%    | 1.000 | 42         | 66.1%    | 1.000 | 31           | 54.2%    | 1.000 |                                                                              |          |      |              |       |        |                |        |       |             |        |        |  |
| FN0612 | 11               | 59.6%    | 1.000 | 7          | 45.2%    | 1.000 | 9          | 44.6%    | 1.000 | 8            | 44.0%    | 1.000 | AAL94808.1  Hypothetical protein                                             |          |      |              |       |        |                |        |       |             |        |        |  |
|        | 10               | 45.2%    | 1.000 | 10         | 50.6%    | 1.000 | 9          | 45.2%    | 1.000 | 9            | 44.0%    | 1.000 |                                                                              |          |      |              |       |        |                |        |       |             |        |        |  |
| FN0614 | 0                | 0.0%     | 0.000 | 1          | 2.1%     | 0.371 | 0          | 0.0%     | 0.000 | 2            | 3.6%     | 0.901 | AAL94810.1  Export ABC transporter                                           |          |      |              |       |        |                |        |       |             |        |        |  |
|        | 1                | 5.5%     | 0.298 | 1          | 4.0%     | 0.469 | 3          | 5.7%     | 0.995 | 0            | 0.0%     | 0.000 |                                                                              |          |      |              |       |        |                |        |       |             |        |        |  |
| FN0615 | 0                | 0.0%     |       | 3          | 12.2%    | 0.935 | 1          | 3.7%     | 0.469 | 1            | 3.1%     | 0.606 | AAL94811.1  Export ABC transporter                                           |          |      |              |       |        |                |        |       |             |        |        |  |
|        | 0                | 0.0%     |       | 0          | 0.0%     | 0.000 | 0          | 0.0%     | 0.000 | 1            | 3.1%     | 0.298 |                                                                              |          |      |              |       |        |                |        |       |             |        |        |  |
| FN0616 | 12               | 25.7%    | 1.000 | 2          | 3.8%     | 0.988 | 1          | 4.0%     | 0.412 | 15           | 34.9%    | 1.000 | AAL94812.1  Hypothetical protein                                             |          |      |              |       |        |                |        |       |             |        |        |  |
|        | 12               | 25.1%    | 1.000 | 5          | 11.7%    | 1.000 | 0          | 0.0%     | 0.000 | 10           | 28.5%    | 1.000 |                                                                              |          |      |              |       |        |                |        |       |             |        |        |  |
| FN0617 | 25               | 57.4%    | 1.000 | 13         | 40.4%    | 1.000 | 20         | 53.3%    | 1.000 | 22           | 60.4%    | 1.000 | AAL94813.1  DNA polymerase III, beta chain                                   |          |      |              |       |        |                |        |       |             |        |        |  |
|        | 27               | 69.8%    | 1.000 | 28         | 70.3%    | 1.000 | 19         | 52.7%    | 1.000 | 23           | 62.6%    | 1.000 |                                                                              |          |      |              |       |        |                |        |       |             |        |        |  |
| FN0618 | 19               | 57.3%    | 1.000 | 12         | 40.6%    | 1.000 | 20         | 62.6%    | 1.000 | 18           | 48.8%    | 1.000 | AAL94814.1  Spermidine/putrescine-binding protein                            |          |      |              |       |        |                |        |       |             |        |        |  |
|        | 19               | 55.3%    | 1.000 | 24         | 68.7%    | 1.000 | 16         | 50.9%    | 1.000 | 18           | 48.8%    | 1.000 |                                                                              |          |      |              |       |        |                |        |       |             |        |        |  |
| FN0619 | 4                | 15.3%    | 1.000 | 3          | 14.6%    | 0.998 | 3          | 10.7%    | 1.000 | 2            | 5.0%     | 1.000 | AAL94815.1  Small-conductance mechanosensitive channel                       |          |      |              |       |        |                |        |       |             |        |        |  |
|        | 6                | 21.0%    | 1.000 | 5          | 21.0%    | 1.000 | 5          | 16.4%    | 1.000 | 3            | 9.6%     | 1.000 |                                                                              |          |      |              |       |        |                |        |       |             |        |        |  |
| FN0621 | 13               | 35.5%    | 1.000 | 7          | 19.8%    | 1.000 | 11         | 26.5%    | 1.000 | 14           | 30.6%    | 1.000 | AAL94817.1  4-hydroxybutyrate coenzyme A transferase                         |          |      |              |       |        |                |        |       |             |        |        |  |
|        | 13               | 34.6%    | 1.000 | 9          | 24.9%    | 1.000 | 13         | 26.7%    | 1.000 | 11           | 27.2%    | 1.000 |                                                                              |          |      |              |       |        |                |        |       |             |        |        |  |
| FN0622 | 5                | 21.2%    | 1.000 | 5          | 14.7%    | 1.000 | 10         | 41.9%    | 1.000 | 4            | 14.3%    | 1.000 | AAL94818.1  8-oxoguanine DNA glycosylase                                     |          |      |              |       |        |                |        |       |             |        |        |  |
|        | 4                | 16.1%    | 1.000 | 16         | 49.8%    | 1.000 | 16         | 53.0%    | 1.000 | 3            | 15.2%    | 0.997 |                                                                              |          |      |              |       |        |                |        |       |             |        |        |  |
| FN0625 | 10               | 30.7%    | 1.000 | 9          | 30.7%    | 1.000 | 2          | 9.8%     | 0.909 | 14           | 34.2%    | 1.000 | AAL94821.1  Aspartate aminotransferase                                       |          |      |              |       |        |                |        |       |             |        |        |  |
|        | 10               | 37.2%    | 1.000 | 1          | 2.3%     | 0.376 | 8          | 24.9%    | 1.000 | 10           | 25.4%    | 1.000 |                                                                              |          |      |              |       |        |                |        |       |             |        |        |  |
| FN0626 | 2                | 7.6%     | 0.995 | 2          | 16.2%    | 0.794 | 1          | 7.6%     | 0.795 | 1            | 7.6%     | 0.954 | AAL94822.1  Hypothetical cytosolic protein                                   |          |      |              |       |        |                |        |       |             |        |        |  |
|        | 2                | 7.6%     | 0.996 | 1          | 7.6%     | 0.982 | 5          | 23.8%    | 1.000 | 2            | 7.6%     | 0.992 |                                                                              |          |      |              |       |        |                |        |       |             |        |        |  |
| FN0627 | 11               | 32.7%    | 1.000 | 6          | 17.0%    | 1.000 | 16         | 41.1%    | 1.000 | 18           | 41.4%    | 1.000 | AAL94823.1  Glucosamine--fructose-6-phosphate aminotransferase (isomerizing) |          |      |              |       |        |                |        |       |             |        |        |  |
|        | 13               | 35.1%    | 1.000 | 18         | 44.9%    | 1.000 | 15         | 41.1%    | 1.000 | 18           | 37.5%    | 1.000 |                                                                              |          |      |              |       |        |                |        |       |             |        |        |  |
| FN0628 | 3                | 12.5%    | 0.989 | 0          | 0.0%     | 0.000 | 5          | 18.2%    | 1.000 | 5            | 19.6%    | 1.000 | AAL94824.1  Glucosamine--fructose-6-phosphate aminotransferase (isomerizing) |          |      |              |       |        |                |        |       |             |        |        |  |
|        | 4                | 12.5%    | 1.000 | 1          | 4.3%     | 0.387 | 3          | 13.1%    | 0.999 | 6            | 19.3%    | 1.000 |                                                                              |          |      |              |       |        |                |        |       |             |        |        |  |

Show detected proteins only  
 Show all proteins  
 Filter by category:

Proteins found: 1424

Enter (or paste) list of ORFs

Find ORFs



| ORF    | Fn Summary Table |          |       | FnPg vs Fn |          |       | FnSg vs Fn |          |       | FnPgSg vs Fn |          |       | FnPgSg vs FnPg                                                  |          |      | FnSg vs FnPg |       |        | FnPgSg vs FnSg |        |       | Fn Coverage |        |        |  |
|--------|------------------|----------|-------|------------|----------|-------|------------|----------|-------|--------------|----------|-------|-----------------------------------------------------------------|----------|------|--------------|-------|--------|----------------|--------|-------|-------------|--------|--------|--|
|        | Fn               |          |       | FnPg       |          |       | FnSg       |          |       | FnPgSg       |          |       | Description                                                     |          |      |              | Fn    |        | FnPg           |        | FnSg  |             | FnPgSg |        |  |
|        | n                | coverage | prob  | n          | coverage | prob  | n          | coverage | prob  | n            | coverage | prob  | n                                                               | coverage | prob | Description  | Rep I | Rep II | Rep I          | Rep II | Rep I | Rep II      | Rep I  | Rep II |  |
| FN0629 | 4                | 11.8%    | 1.000 | 0          | 0.0%     | 0.000 | 4          | 24.4%    | 1.000 | 7            | 24.4%    | 1.000 | AAL94825.1   PTS system, IID component                          |          |      |              |       |        |                |        |       |             |        |        |  |
|        | 5                | 14.7%    | 1.000 | 3          | 16.1%    | 1.000 | 6          | 25.8%    | 1.000 | 8            | 25.4%    | 1.000 |                                                                 |          |      |              |       |        |                |        |       |             |        |        |  |
| FN0630 | 2                | 23.2%    | 0.986 | 0          | 0.0%     | 0.000 | 2          | 12.7%    | 0.994 | 4            | 15.8%    | 1.000 | AAL94826.1   PTS system, IIC component                          |          |      |              |       |        |                |        |       |             |        |        |  |
|        | 3                | 17.8%    | 1.000 | 2          | 11.6%    | 1.000 | 0          | 0.0%     | 0.000 | 4            | 16.6%    | 1.000 |                                                                 |          |      |              |       |        |                |        |       |             |        |        |  |
| FN0631 | 7                | 50.3%    | 1.000 | 1          | 6.5%     | 0.852 | 5          | 46.4%    | 1.000 | 3            | 25.5%    | 1.000 | AAL94827.1   PTS system, IIB component                          |          |      |              |       |        |                |        |       |             |        |        |  |
|        | 6                | 45.1%    | 1.000 | 5          | 35.9%    | 1.000 | 5          | 40.5%    | 1.000 | 4            | 23.5%    | 1.000 |                                                                 |          |      |              |       |        |                |        |       |             |        |        |  |
| FN0633 | 5                | 10.1%    | 1.000 | 1          | 3.4%     | 0.760 | 4          | 9.9%     | 1.000 | 3            | 8.7%     | 1.000 | AAL94829.1   Replication protein                                |          |      |              |       |        |                |        |       |             |        |        |  |
|        | 4                | 9.4%     | 1.000 | 9          | 21.5%    | 1.000 | 8          | 22.9%    | 1.000 | 6            | 14.0%    | 1.000 |                                                                 |          |      |              |       |        |                |        |       |             |        |        |  |
| FN0634 | 19               | 30.6%    | 1.000 | 12         | 23.1%    | 1.000 | 12         | 30.1%    | 1.000 | 21           | 31.9%    | 1.000 | AAL94830.1   GTP-binding protein TypA/BipA                      |          |      |              |       |        |                |        |       |             |        |        |  |
|        | 24               | 30.2%    | 1.000 | 15         | 27.9%    | 1.000 | 14         | 34.5%    | 1.000 | 17           | 27.1%    | 1.000 |                                                                 |          |      |              |       |        |                |        |       |             |        |        |  |
| FN0636 | 3                | 37.8%    | 1.000 | 2          | 26.1%    | 0.995 | 2          | 31.1%    | 0.991 | 0            | 0.0%     |       | AAL94832.1   Hypothetical protein                               |          |      |              |       |        |                |        |       |             |        |        |  |
|        | 2                | 26.1%    | 0.998 | 2          | 26.1%    | 0.992 | 1          | 19.3%    | 0.985 | 0            | 0.0%     |       |                                                                 |          |      |              |       |        |                |        |       |             |        |        |  |
| FN0637 | 3                | 18.0%    | 1.000 | 1          | 9.3%     | 0.588 | 0          | 0.0%     | 0.000 | 4            | 24.4%    | 1.000 | AAL94833.1   Hypothetical exported 24-amino acid repeat protein |          |      |              |       |        |                |        |       |             |        |        |  |
|        | 3                | 16.9%    | 0.997 | 2          | 10.5%    | 0.999 | 1          | 4.7%     | 0.575 | 3            | 20.3%    | 1.000 |                                                                 |          |      |              |       |        |                |        |       |             |        |        |  |
| FN0643 | 7                | 26.9%    | 1.000 | 6          | 26.9%    | 1.000 | 4          | 19.3%    | 1.000 | 5            | 41.4%    | 1.000 | AAL94839.1   hypothetical DNA-binding protein                   |          |      |              |       |        |                |        |       |             |        |        |  |
|        | 5                | 26.2%    | 1.000 | 7          | 40.0%    | 1.000 | 8          | 42.1%    | 1.000 | 3            | 19.3%    | 1.000 |                                                                 |          |      |              |       |        |                |        |       |             |        |        |  |
| FN0644 | 13               | 41.0%    | 1.000 | 8          | 26.8%    | 1.000 | 11         | 32.8%    | 1.000 | 13           | 39.8%    | 1.000 | AAL94840.1   Uroporphyrin-III C-methyltransferase               |          |      |              |       |        |                |        |       |             |        |        |  |
|        | 15               | 44.3%    | 1.000 | 16         | 40.8%    | 1.000 | 13         | 32.8%    | 1.000 | 10           | 25.6%    | 1.000 |                                                                 |          |      |              |       |        |                |        |       |             |        |        |  |
| FN0645 | 5                | 21.1%    | 1.000 | 4          | 11.1%    | 1.000 | 2          | 8.1%     | 0.869 | 5            | 18.1%    | 1.000 | AAL94841.1   Porphobilinogen deaminase                          |          |      |              |       |        |                |        |       |             |        |        |  |
|        | 7                | 25.5%    | 1.000 | 4          | 17.8%    | 0.997 | 6          | 20.5%    | 1.000 | 3            | 13.4%    | 1.000 |                                                                 |          |      |              |       |        |                |        |       |             |        |        |  |
| FN0646 | 1                | 3.3%     | 0.288 | 0          | 0.0%     | 0.000 | 0          | 0.0%     | 0.000 | 3            | 15.2%    | 0.998 | AAL94842.1   Glutamyl-tRNA reductase                            |          |      |              |       |        |                |        |       |             |        |        |  |
|        | 1                | 3.3%     | 0.296 | 2          | 7.9%     | 0.998 | 3          | 10.9%    | 0.999 | 2            | 9.1%     | 0.995 |                                                                 |          |      |              |       |        |                |        |       |             |        |        |  |
| FN0647 | 2                | 3.5%     | 0.666 | 1          | 5.1%     | 0.664 | 0          | 0.0%     | 0.000 | 3            | 9.3%     | 0.984 | AAL94843.1   transcriptional regulator                          |          |      |              |       |        |                |        |       |             |        |        |  |
|        | 0                | 0.0%     | 0.000 | 2          | 6.9%     | 0.714 | 2          | 6.6%     | 0.991 | 2            | 5.3%     | 0.916 |                                                                 |          |      |              |       |        |                |        |       |             |        |        |  |
| FN0649 | 1                | 1.5%     | 0.243 | 4          | 12.2%    | 1.000 | 1          | 1.5%     | 0.526 | 2            | 4.8%     | 0.879 | AAL94845.1   Exoenzymes regulatory protein aepA precursor       |          |      |              |       |        |                |        |       |             |        |        |  |
|        | 0                | 0.0%     | 0.000 | 2          | 3.7%     | 0.982 | 1          | 1.5%     | 0.373 | 2            | 3.5%     | 0.991 |                                                                 |          |      |              |       |        |                |        |       |             |        |        |  |
| FN0651 | 1                | 4.2%     | 0.981 | 1          | 7.3%     | 0.786 | 1          | 5.9%     | 0.977 | 1            | 3.8%     | 0.408 | AAL94847.1   Ribosomal large subunit pseudouridine synthase D   |          |      |              |       |        |                |        |       |             |        |        |  |
|        | 2                | 8.0%     | 0.988 | 1          | 4.2%     | 0.381 | 3          | 17.4%    | 1.000 | 1            | 4.2%     | 0.964 |                                                                 |          |      |              |       |        |                |        |       |             |        |        |  |
| FN0652 | 34               | 79.7%    | 1.000 | 27         | 73.7%    | 1.000 | 36         | 82.7%    | 1.000 | 31           | 78.2%    | 1.000 | AAL94848.1   Glyceraldehyde 3-phosphate dehydrogenase           |          |      |              |       |        |                |        |       |             |        |        |  |
|        | 33               | 79.7%    | 1.000 | 35         | 86.6%    | 1.000 | 34         | 81.8%    | 1.000 | 34           | 78.8%    | 1.000 |                                                                 |          |      |              |       |        |                |        |       |             |        |        |  |
| FN0653 | 17               | 64.6%    | 1.000 | 9          | 37.3%    | 1.000 | 13         | 52.4%    | 1.000 | 8            | 41.0%    | 1.000 | AAL94849.1   unknown                                            |          |      |              |       |        |                |        |       |             |        |        |  |
|        | 15               | 69.3%    | 1.000 | 17         | 58.5%    | 1.000 | 16         | 54.7%    | 1.000 | 8            | 37.3%    | 1.000 |                                                                 |          |      |              |       |        |                |        |       |             |        |        |  |

Show detected proteins only  
 Show all proteins  
 Filter by category:

Proteins found:  
1424

Enter (or paste) list of ORFs

Find ORFs

[Dot Plots](#) [Dot Plots](#)

| ORF    | Fn Summary Table |          |       | FnPg vs Fn |          |       | FnSg vs Fn |          |       | FnPgSg vs Fn |          |       | FnPgSg vs FnPg                                                      |          |      | FnSg vs FnPg |       |        | FnPgSg vs FnSg |        |       | Fn Coverage |        |        |  |
|--------|------------------|----------|-------|------------|----------|-------|------------|----------|-------|--------------|----------|-------|---------------------------------------------------------------------|----------|------|--------------|-------|--------|----------------|--------|-------|-------------|--------|--------|--|
|        | Fn               |          |       | FnPg       |          |       | FnSg       |          |       | FnPgSg       |          |       | Description                                                         |          |      |              | Fn    |        | FnPg           |        | FnSg  |             | FnPgSg |        |  |
|        | n                | coverage | prob  | n          | coverage | prob  | n          | coverage | prob  | n            | coverage | prob  | n                                                                   | coverage | prob | Description  | Rep I | Rep II | Rep I          | Rep II | Rep I | Rep II      | Rep I  | Rep II |  |
| FN0654 | 32               | 66.1%    | 1.000 | 20         | 55.0%    | 1.000 | 39         | 81.2%    | 1.000 | 36           | 70.4%    | 1.000 | AAL94850.1  Phosphoglycerate kinase                                 |          |      |              |       |        |                |        |       |             |        |        |  |
|        | 33               | 66.3%    | 1.000 | 40         | 76.9%    | 1.000 | 35         | 76.9%    | 1.000 | 34           | 67.3%    | 1.000 |                                                                     |          |      |              |       |        |                |        |       |             |        |        |  |
| FN0655 | 8                | 33.0%    | 1.000 | 1          | 12.5%    | 0.983 | 4          | 33.0%    | 1.000 | 6            | 33.0%    | 1.000 | AAL94851.1  unknown                                                 |          |      |              |       |        |                |        |       |             |        |        |  |
|        | 4                | 33.0%    | 1.000 | 4          | 33.9%    | 0.997 | 4          | 42.0%    | 1.000 | 7            | 33.0%    | 1.000 |                                                                     |          |      |              |       |        |                |        |       |             |        |        |  |
| FN0656 | 4                | 39.7%    | 1.000 | 0          | 0.0%     | 0.000 | 1          | 14.3%    | 0.625 | 4            | 39.7%    | 1.000 | AAL94852.1  Hypothetical protein                                    |          |      |              |       |        |                |        |       |             |        |        |  |
|        | 4                | 39.7%    | 1.000 | 2          | 42.1%    | 0.992 | 1          | 25.4%    | 0.463 | 4            | 39.7%    | 1.000 |                                                                     |          |      |              |       |        |                |        |       |             |        |        |  |
| FN0657 | 3                | 20.2%    | 1.000 | 2          | 18.5%    | 0.990 | 6          | 35.8%    | 1.000 | 0            | 0.0%     | 0.000 | AAL94853.1  Acetyltransferase                                       |          |      |              |       |        |                |        |       |             |        |        |  |
|        | 2                | 20.2%    | 0.994 | 6          | 39.9%    | 1.000 | 7          | 48.0%    | 1.000 | 1            | 11.0%    | 0.673 |                                                                     |          |      |              |       |        |                |        |       |             |        |        |  |
| FN0658 | 20               | 63.2%    | 1.000 | 10         | 42.5%    | 1.000 | 12         | 48.7%    | 1.000 | 23           | 65.5%    | 1.000 | AAL94854.1  ABC transporter substrate-binding protein               |          |      |              |       |        |                |        |       |             |        |        |  |
|        | 18               | 56.3%    | 1.000 | 16         | 59.4%    | 1.000 | 15         | 57.9%    | 1.000 | 20           | 59.0%    | 1.000 |                                                                     |          |      |              |       |        |                |        |       |             |        |        |  |
| FN0660 | 5                | 21.2%    | 1.000 | 3          | 10.4%    | 1.000 | 4          | 17.9%    | 1.000 | 4            | 20.0%    | 1.000 | AAL94856.1  ABC transporter ATP-binding protein                     |          |      |              |       |        |                |        |       |             |        |        |  |
|        | 5                | 24.2%    | 1.000 | 4          | 20.0%    | 0.999 | 7          | 31.6%    | 1.000 | 4            | 18.5%    | 1.000 |                                                                     |          |      |              |       |        |                |        |       |             |        |        |  |
| FN0662 | 13               | 42.1%    | 1.000 | 3          | 11.6%    | 1.000 | 12         | 39.3%    | 1.000 | 13           | 41.8%    | 1.000 | AAL94858.1  Formiminoglutamase                                      |          |      |              |       |        |                |        |       |             |        |        |  |
|        | 11               | 37.4%    | 1.000 | 26         | 68.6%    | 1.000 | 17         | 55.7%    | 1.000 | 14           | 39.6%    | 1.000 |                                                                     |          |      |              |       |        |                |        |       |             |        |        |  |
| FN0664 | 22               | 66.0%    | 1.000 | 12         | 33.5%    | 1.000 | 15         | 43.5%    | 1.000 | 17           | 60.2%    | 1.000 | AAL94860.1  2-nitropropane dioxygenase                              |          |      |              |       |        |                |        |       |             |        |        |  |
|        | 23               | 73.0%    | 1.000 | 14         | 38.7%    | 1.000 | 30         | 81.9%    | 1.000 | 15           | 53.7%    | 1.000 |                                                                     |          |      |              |       |        |                |        |       |             |        |        |  |
| FN0666 | 5                | 39.0%    | 1.000 | 1          | 6.3%     | 0.374 | 3          | 21.5%    | 0.994 | 2            | 7.8%     | 0.999 | AAL94862.1  Hypothetical protein                                    |          |      |              |       |        |                |        |       |             |        |        |  |
|        | 6                | 31.2%    | 1.000 | 1          | 4.4%     | 0.745 | 4          | 28.8%    | 0.998 | 1            | 3.4%     | 0.985 |                                                                     |          |      |              |       |        |                |        |       |             |        |        |  |
| FN0668 | 8                | 34.6%    | 1.000 | 4          | 18.3%    | 1.000 | 7          | 37.5%    | 1.000 | 9            | 25.0%    | 1.000 | AAL94864.1  High-affinity zinc uptake system protein znuA precursor |          |      |              |       |        |                |        |       |             |        |        |  |
|        | 12               | 45.8%    | 1.000 | 10         | 44.9%    | 1.000 | 9          | 36.2%    | 1.000 | 4            | 15.4%    | 1.000 |                                                                     |          |      |              |       |        |                |        |       |             |        |        |  |
| FN0672 | 1                | 5.9%     | 0.232 | 1          | 2.5%     | 0.564 | 7          | 20.1%    | 1.000 | 2            | 4.8%     | 0.998 | AAL94868.1  ATPase                                                  |          |      |              |       |        |                |        |       |             |        |        |  |
|        | 0                | 0.0%     | 0.000 | 5          | 12.6%    | 1.000 | 7          | 18.5%    | 1.000 | 5            | 10.7%    | 1.000 |                                                                     |          |      |              |       |        |                |        |       |             |        |        |  |
| FN0675 | 49               | 63.8%    | 1.000 | 36         | 57.1%    | 1.000 | 57         | 76.4%    | 1.000 | 55           | 66.6%    | 1.000 | AAL94871.1  60 kDa chaperonin GROEL                                 |          |      |              |       |        |                |        |       |             |        |        |  |
|        | 48               | 64.4%    | 1.000 | 62         | 86.5%    | 1.000 | 57         | 76.4%    | 1.000 | 53           | 69.0%    | 1.000 |                                                                     |          |      |              |       |        |                |        |       |             |        |        |  |
| FN0676 | 9                | 60.0%    | 1.000 | 2          | 17.8%    | 0.706 | 5          | 41.1%    | 1.000 | 8            | 51.1%    | 1.000 | AAL94872.1  10 kDa chaperonin GROES                                 |          |      |              |       |        |                |        |       |             |        |        |  |
|        | 9                | 60.0%    | 1.000 | 8          | 68.9%    | 1.000 | 6          | 60.0%    | 1.000 | 8            | 50.0%    | 1.000 |                                                                     |          |      |              |       |        |                |        |       |             |        |        |  |
| FN0677 | 14               | 46.2%    | 1.000 | 9          | 27.2%    | 1.000 | 14         | 50.1%    | 1.000 | 7            | 19.3%    | 1.000 | AAL94873.1  Hypothetical protein                                    |          |      |              |       |        |                |        |       |             |        |        |  |
|        | 11               | 36.5%    | 1.000 | 16         | 46.5%    | 1.000 | 18         | 43.6%    | 1.000 | 7            | 22.1%    | 1.000 |                                                                     |          |      |              |       |        |                |        |       |             |        |        |  |
| FN0678 | 17               | 55.0%    | 1.000 | 4          | 21.5%    | 1.000 | 12         | 45.5%    | 1.000 | 14           | 54.5%    | 1.000 | AAL94874.1  Ser/Thr protein kinase                                  |          |      |              |       |        |                |        |       |             |        |        |  |
|        | 14               | 55.0%    | 1.000 | 9          | 50.0%    | 1.000 | 11         | 50.0%    | 1.000 | 11           | 54.5%    | 1.000 |                                                                     |          |      |              |       |        |                |        |       |             |        |        |  |
| FN0679 | 6                | 25.6%    | 1.000 | 3          | 8.1%     | 1.000 | 2          | 13.0%    | 0.984 | 1            | 6.0%     | 0.989 | AAL94875.1  GTPase                                                  |          |      |              |       |        |                |        |       |             |        |        |  |
|        | 5                | 22.8%    | 1.000 | 4          | 21.8%    | 1.000 | 4          | 15.1%    | 1.000 | 3            | 15.1%    | 1.000 |                                                                     |          |      |              |       |        |                |        |       |             |        |        |  |

Show detected proteins only  
 Show all proteins  
 Filter by category:

Proteins found:  
 1424

Enter (or paste) list of ORFs

| ORF    | Fn Summary Table |          | FnPg vs Fn |    | FnSg vs Fn |       | FnPgSg vs Fn |          | FnPgSg vs FnPg |    | FnSg vs FnPg |       | FnPgSg vs FnSg                                         |          | Fn Coverage |   | Description | Fn       |      | FnPg  |        | FnSg  |        | FnPgSg |        |       |        |
|--------|------------------|----------|------------|----|------------|-------|--------------|----------|----------------|----|--------------|-------|--------------------------------------------------------|----------|-------------|---|-------------|----------|------|-------|--------|-------|--------|--------|--------|-------|--------|
|        | n                | coverage | prob       | n  | coverage   | prob  | n            | coverage | prob           | n  | coverage     | prob  | n                                                      | coverage | prob        | n |             | coverage | prob | Rep I | Rep II | Rep I | Rep II | Rep I  | Rep II | Rep I | Rep II |
|        |                  |          |            |    |            |       |              |          |                |    |              |       |                                                        |          |             |   |             |          |      |       |        |       |        |        |        |       |        |
| FN0680 | 2                | 12.6%    | 0.990      | 1  | 12.6%      | 0.907 | 2            | 19.5%    | 0.999          | 3  | 24.2%        | 1.000 | AAL94876.1  Ribulose-phosphate 3-epimerase             |          |             |   |             |          |      |       |        |       |        |        |        |       |        |
|        | 2                | 18.1%    | 0.984      | 3  | 25.1%      | 1.000 | 3            | 25.1%    | 1.000          | 3  | 24.2%        | 1.000 |                                                        |          |             |   |             |          |      |       |        |       |        |        |        |       |        |
| FN0681 | 19               | 60.4%    | 1.000      | 18 | 60.0%      | 1.000 | 23           | 74.7%    | 1.000          | 22 | 73.3%        | 1.000 | AAL94877.1  Transcriptional regulator, MarR family     |          |             |   |             |          |      |       |        |       |        |        |        |       |        |
|        | 17               | 60.4%    | 1.000      | 23 | 71.1%      | 1.000 | 24           | 74.7%    | 1.000          | 17 | 63.6%        | 1.000 |                                                        |          |             |   |             |          |      |       |        |       |        |        |        |       |        |
| FN0682 | 9                | 12.9%    | 1.000      | 8  | 13.9%      | 1.000 | 13           | 24.0%    | 1.000          | 10 | 21.4%        | 1.000 | AAL94878.1  Fibronectin-binding protein-like protein A |          |             |   |             |          |      |       |        |       |        |        |        |       |        |
|        | 8                | 8.9%     | 1.000      | 9  | 18.1%      | 1.000 | 15           | 27.7%    | 1.000          | 8  | 17.9%        | 1.000 |                                                        |          |             |   |             |          |      |       |        |       |        |        |        |       |        |
| FN0684 | 0                | 0.0%     |            | 5  | 16.1%      | 1.000 | 8            | 21.2%    | 1.000          | 3  | 9.5%         | 0.909 | AAL94880.1  Prismane protein                           |          |             |   |             |          |      |       |        |       |        |        |        |       |        |
|        | 0                | 0.0%     |            | 16 | 38.5%      | 1.000 | 7            | 18.2%    | 1.000          | 1  | 2.7%         | 0.383 |                                                        |          |             |   |             |          |      |       |        |       |        |        |        |       |        |
| FN0685 | 4                | 6.2%     | 1.000      | 2  | 2.5%       | 1.000 | 6            | 11.0%    | 1.000          | 4  | 11.8%        | 1.000 | AAL94881.1  Sodium/pantothenate symporter              |          |             |   |             |          |      |       |        |       |        |        |        |       |        |
|        | 5                | 11.4%    | 1.000      | 8  | 10.1%      | 1.000 | 7            | 16.5%    | 1.000          | 3  | 10.5%        | 0.999 |                                                        |          |             |   |             |          |      |       |        |       |        |        |        |       |        |
| FN0688 | 5                | 43.1%    | 1.000      | 0  | 0.0%       | 0.000 | 6            | 50.3%    | 1.000          | 3  | 24.8%        | 1.000 | AAL94884.1  Hypothetical protein                       |          |             |   |             |          |      |       |        |       |        |        |        |       |        |
|        | 5                | 43.1%    | 1.000      | 8  | 50.3%      | 1.000 | 8            | 50.3%    | 1.000          | 3  | 24.2%        | 1.000 |                                                        |          |             |   |             |          |      |       |        |       |        |        |        |       |        |
| FN0689 | 20               | 75.2%    | 1.000      | 8  | 50.3%      | 1.000 | 17           | 79.7%    | 1.000          | 18 | 74.5%        | 1.000 | AAL94885.1  Hypothetical protein                       |          |             |   |             |          |      |       |        |       |        |        |        |       |        |
|        | 18               | 69.9%    | 1.000      | 15 | 79.7%      | 1.000 | 16           | 79.7%    | 1.000          | 15 | 74.5%        | 1.000 |                                                        |          |             |   |             |          |      |       |        |       |        |        |        |       |        |
| FN0692 | 6                | 24.1%    | 1.000      | 2  | 10.1%      | 0.992 | 3            | 13.0%    | 0.998          | 2  | 9.4%         | 1.000 | AAL94888.1  Nitrogen regulation protein NIFR3          |          |             |   |             |          |      |       |        |       |        |        |        |       |        |
|        | 9                | 37.5%    | 1.000      | 2  | 8.1%       | 1.000 | 6            | 23.5%    | 1.000          | 3  | 13.4%        | 0.999 |                                                        |          |             |   |             |          |      |       |        |       |        |        |        |       |        |
| FN0693 | 11               | 16.4%    | 1.000      | 11 | 14.8%      | 1.000 | 1            | 0.8%     | 0.287          | 6  | 9.4%         | 1.000 | AAL94889.1  DNA mismatch repair protein mutS           |          |             |   |             |          |      |       |        |       |        |        |        |       |        |
|        | 13               | 18.5%    | 1.000      | 1  | 0.8%       | 0.296 | 2            | 3.0%     | 0.555          | 2  | 2.8%         | 0.973 |                                                        |          |             |   |             |          |      |       |        |       |        |        |        |       |        |
| FN0694 | 26               | 43.4%    | 1.000      | 10 | 20.7%      | 1.000 | 15           | 26.6%    | 1.000          | 21 | 36.1%        | 1.000 | AAL94890.1  S-layer protein                            |          |             |   |             |          |      |       |        |       |        |        |        |       |        |
|        | 23               | 37.2%    | 1.000      | 14 | 28.3%      | 1.000 | 24           | 36.2%    | 1.000          | 21 | 37.8%        | 1.000 |                                                        |          |             |   |             |          |      |       |        |       |        |        |        |       |        |
| FN0695 | 9                | 40.7%    | 1.000      | 5  | 33.2%      | 1.000 | 11           | 54.8%    | 1.000          | 5  | 36.1%        | 1.000 | AAL94891.1  ABC transporter ATP-binding protein        |          |             |   |             |          |      |       |        |       |        |        |        |       |        |
|        | 8                | 36.5%    | 1.000      | 8  | 35.7%      | 1.000 | 10           | 49.8%    | 1.000          | 5  | 27.4%        | 1.000 |                                                        |          |             |   |             |          |      |       |        |       |        |        |        |       |        |
| FN0697 | 39               | 37.1%    | 1.000      | 29 | 39.6%      | 1.000 | 29           | 39.3%    | 1.000          | 30 | 31.7%        | 1.000 | AAL94893.1  Alanyl-tRNA synthetase                     |          |             |   |             |          |      |       |        |       |        |        |        |       |        |
|        | 36               | 37.3%    | 1.000      | 32 | 41.1%      | 1.000 | 36           | 42.1%    | 1.000          | 34 | 43.8%        | 1.000 |                                                        |          |             |   |             |          |      |       |        |       |        |        |        |       |        |
| FN0699 | 11               | 30.9%    | 1.000      | 10 | 27.3%      | 1.000 | 10           | 38.0%    | 1.000          | 12 | 42.3%        | 1.000 | AAL94895.1  Protein translocase subunit secD           |          |             |   |             |          |      |       |        |       |        |        |        |       |        |
|        | 13               | 36.3%    | 1.000      | 8  | 25.5%      | 1.000 | 8            | 30.7%    | 1.000          | 14 | 44.3%        | 1.000 |                                                        |          |             |   |             |          |      |       |        |       |        |        |        |       |        |
| FN0700 | 6                | 16.7%    | 1.000      | 5  | 29.3%      | 1.000 | 3            | 12.6%    | 1.000          | 5  | 22.1%        | 1.000 | AAL94896.1  Protein translocase subunit secF           |          |             |   |             |          |      |       |        |       |        |        |        |       |        |
|        | 7                | 19.9%    | 1.000      | 5  | 18.3%      | 1.000 | 5            | 24.6%    | 1.000          | 9  | 35.3%        | 1.000 |                                                        |          |             |   |             |          |      |       |        |       |        |        |        |       |        |
| FN0701 | 22               | 48.9%    | 1.000      | 25 | 53.0%      | 1.000 | 20           | 43.5%    | 1.000          | 21 | 47.2%        | 1.000 | AAL94897.1  Methyltransferase                          |          |             |   |             |          |      |       |        |       |        |        |        |       |        |
|        | 22               | 46.8%    | 1.000      | 25 | 50.3%      | 1.000 | 23           | 49.9%    | 1.000          | 21 | 41.2%        | 1.000 |                                                        |          |             |   |             |          |      |       |        |       |        |        |        |       |        |
| FN0705 | 35               | 38.6%    | 1.000      | 13 | 20.7%      | 1.000 | 31           | 32.1%    | 1.000          | 26 | 29.0%        | 1.000 | AAL94901.1  DNA polymerase I                           |          |             |   |             |          |      |       |        |       |        |        |        |       |        |
|        | 32               | 38.9%    | 1.000      | 36 | 41.1%      | 1.000 | 40           | 42.3%    | 1.000          | 21 | 25.5%        | 1.000 |                                                        |          |             |   |             |          |      |       |        |       |        |        |        |       |        |

Show detected proteins only  
 Show all proteins  
 Filter by category:

Proteins found:  
 1424

Enter (or paste) list of ORFs

| ORF    | Fn Summary Table |          |       | FnPg vs Fn |          |       | FnSg vs Fn |          |       | FnPgSg vs Fn |          |       | FnPgSg vs FnPg                                               |          |      | FnSg vs FnPg |       |        | FnPgSg vs FnSg |        |       | Fn Coverage |        |        |  |
|--------|------------------|----------|-------|------------|----------|-------|------------|----------|-------|--------------|----------|-------|--------------------------------------------------------------|----------|------|--------------|-------|--------|----------------|--------|-------|-------------|--------|--------|--|
|        | Fn               |          |       | FnPg       |          |       | FnSg       |          |       | FnPgSg       |          |       | Description                                                  |          |      |              | Fn    |        | FnPg           |        | FnSg  |             | FnPgSg |        |  |
|        | n                | coverage | prob  | n          | coverage | prob  | n          | coverage | prob  | n            | coverage | prob  | n                                                            | coverage | prob | Description  | Rep I | Rep II | Rep I          | Rep II | Rep I | Rep II      | Rep I  | Rep II |  |
| FN0706 | 3                | 12.4%    | 1.000 | 0          | 0.0%     | 0.000 | 1          | 5.7%     | 0.981 | 3            | 18.4%    | 1.000 | AAL94902.1  Hypothetical cytosolic protein                   |          |      |              |       |        |                |        |       |             |        |        |  |
|        | 4                | 23.4%    | 1.000 | 1          | 6.4%     | 0.983 | 3          | 17.1%    | 0.999 | 1            | 5.7%     | 0.537 |                                                              |          |      |              |       |        |                |        |       |             |        |        |  |
| FN0707 | 6                | 17.9%    | 1.000 | 7          | 26.3%    | 1.000 | 5          | 14.1%    | 1.000 | 5            | 15.4%    | 1.000 | AAL94903.1  Riboflavin kinase                                |          |      |              |       |        |                |        |       |             |        |        |  |
|        | 9                | 27.6%    | 1.000 | 4          | 15.4%    | 1.000 | 6          | 19.1%    | 1.000 | 3            | 14.1%    | 1.000 |                                                              |          |      |              |       |        |                |        |       |             |        |        |  |
| FN0710 | 13               | 38.2%    | 1.000 | 9          | 26.7%    | 1.000 | 12         | 35.6%    | 1.000 | 11           | 31.1%    | 1.000 | AAL94906.1  Hypothetical protein                             |          |      |              |       |        |                |        |       |             |        |        |  |
|        | 13               | 38.7%    | 1.000 | 14         | 38.7%    | 1.000 | 12         | 27.6%    | 1.000 | 8            | 34.7%    | 1.000 |                                                              |          |      |              |       |        |                |        |       |             |        |        |  |
| FN0711 | 3                | 6.9%     | 0.985 | 1          | 3.0%     | 0.983 | 5          | 11.4%    | 1.000 | 4            | 9.7%     | 0.998 | AAL94907.1  Phosphopantothenate--cysteine ligase             |          |      |              |       |        |                |        |       |             |        |        |  |
|        | 5                | 12.6%    | 1.000 | 7          | 24.0%    | 1.000 | 9          | 25.0%    | 1.000 | 6            | 11.9%    | 1.000 |                                                              |          |      |              |       |        |                |        |       |             |        |        |  |
| FN0714 | 2                | 8.0%     | 0.886 | 4          | 19.4%    | 1.000 | 5          | 18.8%    | 1.000 | 2            | 9.6%     | 0.872 | AAL94910.1  NADH oxidase                                     |          |      |              |       |        |                |        |       |             |        |        |  |
|        | 2                | 8.0%     | 0.743 | 4          | 17.2%    | 1.000 | 6          | 30.3%    | 1.000 | 2            | 8.0%     | 0.986 |                                                              |          |      |              |       |        |                |        |       |             |        |        |  |
| FN0715 | 11               | 40.3%    | 1.000 | 6          | 21.4%    | 1.000 | 7          | 25.5%    | 1.000 | 12           | 33.4%    | 1.000 | AAL94911.1  Hypothetical protein                             |          |      |              |       |        |                |        |       |             |        |        |  |
|        | 9                | 33.4%    | 1.000 | 7          | 33.4%    | 1.000 | 6          | 29.0%    | 1.000 | 12           | 36.9%    | 1.000 |                                                              |          |      |              |       |        |                |        |       |             |        |        |  |
| FN0716 | 16               | 42.7%    | 1.000 | 10         | 38.9%    | 1.000 | 12         | 46.2%    | 1.000 | 10           | 39.2%    | 1.000 | AAL94912.1  hypothetical protein                             |          |      |              |       |        |                |        |       |             |        |        |  |
|        | 12               | 42.0%    | 1.000 | 7          | 28.7%    | 1.000 | 9          | 31.8%    | 1.000 | 10           | 31.2%    | 1.000 |                                                              |          |      |              |       |        |                |        |       |             |        |        |  |
| FN0717 | 2                | 13.7%    | 0.984 | 1          | 5.3%     | 0.984 | 2          | 13.7%    | 0.943 | 4            | 25.2%    | 0.999 | AAL94913.1  Ribosomal small subunit pseudouridine synthase A |          |      |              |       |        |                |        |       |             |        |        |  |
|        | 3                | 20.8%    | 0.996 | 1          | 8.4%     | 0.803 | 4          | 28.3%    | 0.998 | 1            | 7.1%     | 0.916 |                                                              |          |      |              |       |        |                |        |       |             |        |        |  |
| FN0719 | 4                | 14.6%    | 1.000 | 1          | 4.9%     | 0.618 | 0          | 0.0%     | 0.000 | 1            | 2.9%     | 0.986 | AAL94915.1  Hypothetical cytosolic protein                   |          |      |              |       |        |                |        |       |             |        |        |  |
|        | 4                | 12.0%    | 1.000 | 2          | 6.9%     | 0.961 | 1          | 2.0%     | 0.326 | 2            | 4.9%     | 0.995 |                                                              |          |      |              |       |        |                |        |       |             |        |        |  |
| FN0720 | 11               | 46.0%    | 1.000 | 5          | 23.0%    | 1.000 | 6          | 36.4%    | 1.000 | 7            | 41.7%    | 1.000 | AAL94916.1  Protein Translation Elongation Factor P (EF-P)   |          |      |              |       |        |                |        |       |             |        |        |  |
|        | 7                | 41.7%    | 1.000 | 8          | 49.2%    | 1.000 | 8          | 42.8%    | 1.000 | 7            | 32.6%    | 1.000 |                                                              |          |      |              |       |        |                |        |       |             |        |        |  |
| FN0721 | 15               | 49.4%    | 1.000 | 3          | 11.3%    | 1.000 | 6          | 25.5%    | 1.000 | 11           | 45.6%    | 1.000 | AAL94917.1  Hypothetical protein                             |          |      |              |       |        |                |        |       |             |        |        |  |
|        | 12               | 38.1%    | 1.000 | 10         | 41.0%    | 1.000 | 5          | 24.3%    | 1.000 | 13           | 44.4%    | 1.000 |                                                              |          |      |              |       |        |                |        |       |             |        |        |  |
| FN0722 | 3                | 5.9%     | 0.999 | 5          | 8.7%     | 1.000 | 6          | 10.2%    | 1.000 | 4            | 7.1%     | 1.000 | AAL94918.1  WD-repeat family protein                         |          |      |              |       |        |                |        |       |             |        |        |  |
|        | 4                | 6.3%     | 1.000 | 3          | 5.6%     | 0.994 | 6          | 11.3%    | 1.000 | 0            | 0.0%     | 0.000 |                                                              |          |      |              |       |        |                |        |       |             |        |        |  |
| FN0723 | 1                | 1.6%     | 0.977 | 1          | 3.9%     | 0.845 | 1          | 1.8%     | 0.949 | 1            | 3.1%     | 0.589 | AAL94919.1  Hypothetical protein                             |          |      |              |       |        |                |        |       |             |        |        |  |
|        | 2                | 4.9%     | 0.994 | 4          | 8.1%     | 0.948 | 5          | 14.1%    | 1.000 | 0            | 0.0%     | 0.000 |                                                              |          |      |              |       |        |                |        |       |             |        |        |  |
| FN0724 | 10               | 55.7%    | 1.000 | 10         | 57.5%    | 1.000 | 9          | 59.9%    | 1.000 | 9            | 53.3%    | 1.000 | AAL94920.1  Flavodoxin                                       |          |      |              |       |        |                |        |       |             |        |        |  |
|        | 8                | 46.7%    | 1.000 | 12         | 86.2%    | 1.000 | 14         | 86.2%    | 1.000 | 11           | 79.0%    | 1.000 |                                                              |          |      |              |       |        |                |        |       |             |        |        |  |
| FN0725 | 5                | 23.9%    | 1.000 | 4          | 23.9%    | 0.996 | 8          | 47.0%    | 1.000 | 4            | 23.9%    | 1.000 | AAL94921.1  Molybdopterin biosynthesis MoeB protein          |          |      |              |       |        |                |        |       |             |        |        |  |
|        | 4                | 23.9%    | 1.000 | 8          | 33.3%    | 1.000 | 14         | 61.1%    | 1.000 | 5            | 20.1%    | 1.000 |                                                              |          |      |              |       |        |                |        |       |             |        |        |  |
| FN0728 | 9                | 25.1%    | 1.000 | 9          | 44.1%    | 1.000 | 9          | 40.8%    | 1.000 | 7            | 23.7%    | 1.000 | AAL94924.1  Hypothetical protein                             |          |      |              |       |        |                |        |       |             |        |        |  |
|        | 8                | 37.0%    | 1.000 | 13         | 60.7%    | 1.000 | 11         | 55.0%    | 1.000 | 7            | 23.7%    | 1.000 |                                                              |          |      |              |       |        |                |        |       |             |        |        |  |

Show detected proteins only  
 Show all proteins  
 Filter by category:

Proteins found:  
 1424

Enter (or paste) list of ORFs

| ORF    | Fn Summary Table |          |       | FnPg vs Fn |          |       | FnSg vs Fn |          |       | FnPgSg vs Fn |          |       | FnPgSg vs FnPg                                                 |          |      | FnSg vs FnPg |       |        | FnPgSg vs FnSg |        |       | Fn Coverage |        |        |  |
|--------|------------------|----------|-------|------------|----------|-------|------------|----------|-------|--------------|----------|-------|----------------------------------------------------------------|----------|------|--------------|-------|--------|----------------|--------|-------|-------------|--------|--------|--|
|        | Fn               |          |       | FnPg       |          |       | FnSg       |          |       | FnPgSg       |          |       | Description                                                    |          |      |              | Fn    |        | FnPg           |        | FnSg  |             | FnPgSg |        |  |
|        | n                | coverage | prob  | n          | coverage | prob  | n          | coverage | prob  | n            | coverage | prob  | n                                                              | coverage | prob | Description  | Rep I | Rep II | Rep I          | Rep II | Rep I | Rep II      | Rep I  | Rep II |  |
| FN0729 | 18               | 36.8%    | 1.000 | 19         | 56.1%    | 1.000 | 14         | 40.8%    | 1.000 | 18           | 42.1%    | 1.000 | AAL94925.1  Phosphoglycerate mutase                            |          |      |              |       |        |                |        |       |             |        |        |  |
|        | 18               | 44.7%    | 1.000 | 15         | 46.9%    | 1.000 | 14         | 56.1%    | 1.000 | 17           | 45.2%    | 1.000 |                                                                |          |      |              |       |        |                |        |       |             |        |        |  |
| FN0731 | 9                | 29.4%    | 1.000 | 4          | 17.5%    | 1.000 | 5          | 22.6%    | 1.000 | 7            | 34.5%    | 1.000 | AAL94927.1  Hypothetical protein                               |          |      |              |       |        |                |        |       |             |        |        |  |
|        | 7                | 23.2%    | 1.000 | 11         | 45.8%    | 1.000 | 5          | 22.6%    | 1.000 | 6            | 33.3%    | 1.000 |                                                                |          |      |              |       |        |                |        |       |             |        |        |  |
| FN0733 | 21               | 54.9%    | 1.000 | 17         | 42.2%    | 1.000 | 15         | 44.4%    | 1.000 | 20           | 57.0%    | 1.000 | AAL94929.1  Peptidase T                                        |          |      |              |       |        |                |        |       |             |        |        |  |
|        | 25               | 54.9%    | 1.000 | 16         | 49.3%    | 1.000 | 16         | 49.0%    | 1.000 | 18           | 51.0%    | 1.000 |                                                                |          |      |              |       |        |                |        |       |             |        |        |  |
| FN0734 | 5                | 10.4%    | 1.000 | 1          | 1.4%     | 0.303 | 3          | 8.3%     | 0.883 | 2            | 3.0%     | 0.708 | AAL94930.1  Fe-S oxidoreductase                                |          |      |              |       |        |                |        |       |             |        |        |  |
|        | 5                | 8.6%     | 1.000 | 1          | 3.0%     | 0.260 | 3          | 5.6%     | 0.980 | 0            | 0.0%     | 0.000 |                                                                |          |      |              |       |        |                |        |       |             |        |        |  |
| FN0735 | 18               | 41.2%    | 1.000 | 21         | 40.2%    | 1.000 | 8          | 14.9%    | 1.000 | 17           | 41.5%    | 1.000 | AAL94931.1  Cell surface protein                               |          |      |              |       |        |                |        |       |             |        |        |  |
|        | 16               | 35.8%    | 1.000 | 17         | 30.6%    | 1.000 | 12         | 18.8%    | 1.000 | 16           | 43.3%    | 1.000 |                                                                |          |      |              |       |        |                |        |       |             |        |        |  |
| FN0736 | 2                | 10.4%    | 0.965 | 3          | 10.4%    | 1.000 | 6          | 37.1%    | 1.000 | 3            | 19.1%    | 0.983 | AAL94932.1  Methyltransferase                                  |          |      |              |       |        |                |        |       |             |        |        |  |
|        | 2                | 10.8%    | 0.990 | 3          | 14.3%    | 1.000 | 8          | 39.0%    | 1.000 | 3            | 19.1%    | 1.000 |                                                                |          |      |              |       |        |                |        |       |             |        |        |  |
| FN0737 | 1                | 10.1%    | 0.981 | 2          | 10.1%    | 0.989 | 2          | 17.4%    | 0.995 | 6            | 25.7%    | 1.000 | AAL94933.1  Hypothetical protein                               |          |      |              |       |        |                |        |       |             |        |        |  |
|        | 1                | 10.1%    | 0.982 | 6          | 37.6%    | 1.000 | 2          | 17.4%    | 0.997 | 5            | 24.8%    | 1.000 |                                                                |          |      |              |       |        |                |        |       |             |        |        |  |
| FN0738 | 12               | 36.5%    | 1.000 | 9          | 27.9%    | 1.000 | 10         | 21.9%    | 1.000 | 10           | 29.3%    | 1.000 | AAL94934.1  Hypothetical exported 24-amino acid repeat protein |          |      |              |       |        |                |        |       |             |        |        |  |
|        | 13               | 33.9%    | 1.000 | 14         | 32.8%    | 1.000 | 11         | 28.8%    | 1.000 | 9            | 29.1%    | 1.000 |                                                                |          |      |              |       |        |                |        |       |             |        |        |  |
| FN0739 | 18               | 61.3%    | 1.000 | 16         | 50.9%    | 1.000 | 16         | 57.1%    | 1.000 | 27           | 61.3%    | 1.000 | AAL94935.1  Formiminotetrahydrofolate cyclodeaminase           |          |      |              |       |        |                |        |       |             |        |        |  |
|        | 24               | 62.3%    | 1.000 | 18         | 58.0%    | 1.000 | 16         | 58.0%    | 1.000 | 25           | 61.3%    | 1.000 |                                                                |          |      |              |       |        |                |        |       |             |        |        |  |
| FN0740 | 31               | 70.2%    | 1.000 | 21         | 54.5%    | 1.000 | 36         | 74.1%    | 1.000 | 29           | 65.9%    | 1.000 | AAL94936.1  Imidazolonepropionase                              |          |      |              |       |        |                |        |       |             |        |        |  |
|        | 31               | 70.0%    | 1.000 | 41         | 78.7%    | 1.000 | 36         | 74.8%    | 1.000 | 33           | 74.1%    | 1.000 |                                                                |          |      |              |       |        |                |        |       |             |        |        |  |
| FN0741 | 36               | 74.5%    | 1.000 | 29         | 65.7%    | 1.000 | 36         | 77.9%    | 1.000 | 44           | 76.9%    | 1.000 | AAL94937.1  Glutamate formiminotransferase                     |          |      |              |       |        |                |        |       |             |        |        |  |
|        | 32               | 70.7%    | 1.000 | 43         | 80.4%    | 1.000 | 36         | 77.9%    | 1.000 | 47           | 76.9%    | 1.000 |                                                                |          |      |              |       |        |                |        |       |             |        |        |  |
| FN0742 | 8                | 37.2%    | 1.000 | 1          | 10.9%    | 0.984 | 8          | 34.6%    | 1.000 | 6            | 37.8%    | 1.000 | AAL94938.1  unknown                                            |          |      |              |       |        |                |        |       |             |        |        |  |
|        | 9                | 42.9%    | 1.000 | 10         | 49.4%    | 1.000 | 9          | 50.0%    | 1.000 | 6            | 37.8%    | 1.000 |                                                                |          |      |              |       |        |                |        |       |             |        |        |  |
| FN0743 | 5                | 8.4%     | 1.000 | 2          | 5.4%     | 0.595 | 3          | 6.1%     | 0.999 | 10           | 13.8%    | 1.000 | AAL94939.1  ATP-dependent helicase, DinG family                |          |      |              |       |        |                |        |       |             |        |        |  |
|        | 5                | 9.7%     | 1.000 | 0          | 0.0%     | 0.000 | 4          | 8.4%     | 0.997 | 6            | 8.8%     | 1.000 |                                                                |          |      |              |       |        |                |        |       |             |        |        |  |
| FN0745 | 22               | 31.6%    | 1.000 | 10         | 18.6%    | 1.000 | 35         | 42.6%    | 1.000 | 24           | 40.4%    | 1.000 | AAL94941.1  metal dependent phosphohydrolase                   |          |      |              |       |        |                |        |       |             |        |        |  |
|        | 24               | 30.8%    | 1.000 | 34         | 38.8%    | 1.000 | 34         | 43.2%    | 1.000 | 23           | 32.4%    | 1.000 |                                                                |          |      |              |       |        |                |        |       |             |        |        |  |
| FN0746 | 4                | 29.0%    | 1.000 | 4          | 29.6%    | 1.000 | 3          | 24.7%    | 1.000 | 2            | 8.6%     | 1.000 | AAL94942.1  Hypothetical Metal-Binding Protein                 |          |      |              |       |        |                |        |       |             |        |        |  |
|        | 2                | 20.4%    | 0.994 | 4          | 35.2%    | 1.000 | 6          | 48.1%    | 1.000 | 2            | 8.6%     | 1.000 |                                                                |          |      |              |       |        |                |        |       |             |        |        |  |
| FN0749 | 4                | 12.3%    | 1.000 | 1          | 4.2%     | 0.894 | 0          | 0.0%     |       | 2            | 4.9%     | 0.984 | AAL94945.1  Hypothetical protein                               |          |      |              |       |        |                |        |       |             |        |        |  |
|        | 3                | 10.9%    | 0.999 | 2          | 7.9%     | 0.913 | 0          | 0.0%     |       | 3            | 13.8%    | 1.000 |                                                                |          |      |              |       |        |                |        |       |             |        |        |  |

Show detected proteins only  
 Show all proteins  
 Filter by category:

Proteins found:  
 1424

Enter (or paste) list of ORFs

| ORF    | Fn Summary Table |          |       | FnPg vs Fn |          |       | FnSg vs Fn |          |       | FnPgSg vs Fn |          |       | FnPgSg vs FnPg                                                             |          |      | FnSg vs FnPg |       |        | FnPgSg vs FnSg |        |       | Fn Coverage |        |        |  |
|--------|------------------|----------|-------|------------|----------|-------|------------|----------|-------|--------------|----------|-------|----------------------------------------------------------------------------|----------|------|--------------|-------|--------|----------------|--------|-------|-------------|--------|--------|--|
|        | Fn               |          |       | FnPg       |          |       | FnSg       |          |       | FnPgSg       |          |       | Description                                                                |          |      |              | Fn    |        | FnPg           |        | FnSg  |             | FnPgSg |        |  |
|        | n                | coverage | prob  | n          | coverage | prob  | n          | coverage | prob  | n            | coverage | prob  | n                                                                          | coverage | prob | Description  | Rep I | Rep II | Rep I          | Rep II | Rep I | Rep II      | Rep I  | Rep II |  |
| FN0750 | 8                | 39.1%    | 1.000 | 4          | 24.7%    | 1.000 | 9          | 38.3%    | 1.000 | 3            | 16.0%    | 1.000 | AAL94946.1   Hypothetical protein                                          |          |      |              |       |        |                |        |       |             |        |        |  |
|        | 8                | 35.4%    | 1.000 | 9          | 36.6%    | 1.000 | 10         | 38.7%    | 1.000 | 4            | 22.2%    | 1.000 |                                                                            |          |      |              |       |        |                |        |       |             |        |        |  |
| FN0751 | 4                | 18.2%    | 1.000 | 5          | 21.4%    | 1.000 | 6          | 28.9%    | 1.000 | 6            | 21.1%    | 1.000 | AAL94947.1   L-asparaginase I                                              |          |      |              |       |        |                |        |       |             |        |        |  |
|        | 5                | 21.1%    | 1.000 | 11         | 50.0%    | 1.000 | 8          | 33.3%    | 1.000 | 6            | 28.9%    | 1.000 |                                                                            |          |      |              |       |        |                |        |       |             |        |        |  |
| FN0752 | 5                | 10.7%    | 1.000 | 3          | 15.7%    | 1.000 | 9          | 28.5%    | 1.000 | 6            | 19.7%    | 1.000 | AAL94948.1   Proline iminopeptidase                                        |          |      |              |       |        |                |        |       |             |        |        |  |
|        | 7                | 23.5%    | 1.000 | 9          | 26.0%    | 1.000 | 7          | 24.5%    | 1.000 | 3            | 12.9%    | 1.000 |                                                                            |          |      |              |       |        |                |        |       |             |        |        |  |
| FN0753 | 14               | 33.3%    | 1.000 | 9          | 21.0%    | 1.000 | 13         | 30.6%    | 1.000 | 24           | 49.5%    | 1.000 | AAL94949.1   Glutamyl-tRNA(Gln) amidotransferase subunit B                 |          |      |              |       |        |                |        |       |             |        |        |  |
|        | 18               | 40.3%    | 1.000 | 23         | 52.8%    | 1.000 | 17         | 39.5%    | 1.000 | 21           | 47.6%    | 1.000 |                                                                            |          |      |              |       |        |                |        |       |             |        |        |  |
| FN0754 | 23               | 48.5%    | 1.000 | 19         | 41.7%    | 1.000 | 22         | 53.2%    | 1.000 | 23           | 48.3%    | 1.000 | AAL94950.1   Glutamyl-tRNA(Gln) amidotransferase subunit A                 |          |      |              |       |        |                |        |       |             |        |        |  |
|        | 23               | 46.6%    | 1.000 | 25         | 51.1%    | 1.000 | 24         | 50.3%    | 1.000 | 21           | 48.7%    | 1.000 |                                                                            |          |      |              |       |        |                |        |       |             |        |        |  |
| FN0755 | 9                | 79.2%    | 1.000 | 5          | 56.2%    | 1.000 | 7          | 79.2%    | 1.000 | 6            | 68.8%    | 1.000 | AAL94951.1   Glutamyl-tRNA(Gln) amidotransferase subunit C                 |          |      |              |       |        |                |        |       |             |        |        |  |
|        | 10               | 79.2%    | 1.000 | 7          | 79.2%    | 1.000 | 6          | 68.8%    | 1.000 | 9            | 79.2%    | 1.000 |                                                                            |          |      |              |       |        |                |        |       |             |        |        |  |
| FN0758 | 22               | 40.8%    | 1.000 | 9          | 25.2%    | 1.000 | 23         | 48.4%    | 1.000 | 19           | 45.9%    | 1.000 | AAL94954.1   Rod shape-determining protein mreB                            |          |      |              |       |        |                |        |       |             |        |        |  |
|        | 21               | 36.0%    | 1.000 | 21         | 44.5%    | 1.000 | 27         | 54.1%    | 1.000 | 17           | 49.6%    | 1.000 |                                                                            |          |      |              |       |        |                |        |       |             |        |        |  |
| FN0761 | 8                | 32.0%    | 1.000 | 1          | 7.4%     | 0.766 | 10         | 52.7%    | 1.000 | 4            | 17.2%    | 1.000 | AAL94957.1   Bvg accessory factor                                          |          |      |              |       |        |                |        |       |             |        |        |  |
|        | 8                | 42.6%    | 1.000 | 11         | 55.1%    | 1.000 | 6          | 34.0%    | 1.000 | 4            | 16.8%    | 1.000 |                                                                            |          |      |              |       |        |                |        |       |             |        |        |  |
| FN0765 | 5                | 20.7%    | 1.000 | 2          | 8.8%     | 0.970 | 1          | 6.9%     | 0.465 | 3            | 12.2%    | 0.979 | AAL94961.1   tRNA (5-methylaminomethyl-2-thiouridylate) -methyltransferase |          |      |              |       |        |                |        |       |             |        |        |  |
|        | 6                | 30.7%    | 1.000 | 4          | 15.5%    | 1.000 | 3          | 14.1%    | 0.980 | 1            | 3.6%     | 0.986 |                                                                            |          |      |              |       |        |                |        |       |             |        |        |  |
| FN0766 | 3                | 14.8%    | 0.999 | 1          | 6.3%     | 0.424 | 2          | 14.8%    | 0.988 | 2            | 16.2%    | 1.000 | AAL94962.1   Large-conductance mechanosensitive channel                    |          |      |              |       |        |                |        |       |             |        |        |  |
|        | 3                | 24.6%    | 1.000 | 2          | 14.8%    | 0.990 | 2          | 14.8%    | 1.000 | 4            | 24.6%    | 1.000 |                                                                            |          |      |              |       |        |                |        |       |             |        |        |  |
| FN0768 | 5                | 10.5%    | 1.000 | 0          | 0.0%     | 0.000 | 1          | 1.7%     | 0.304 | 3            | 4.1%     | 0.983 | AAL94964.1   Hemin receptor                                                |          |      |              |       |        |                |        |       |             |        |        |  |
|        | 7                | 14.5%    | 1.000 | 4          | 12.3%    | 0.980 | 1          | 3.6%     | 0.504 | 1            | 1.1%     | 0.553 |                                                                            |          |      |              |       |        |                |        |       |             |        |        |  |
| FN0771 | 2                | 4.6%     | 0.972 | 1          | 1.9%     | 0.674 | 3          | 4.6%     | 0.998 | 0            | 0.0%     | 0.000 | AAL94967.1   Oxygen-independent coproporphyrinogen III oxidase             |          |      |              |       |        |                |        |       |             |        |        |  |
|        | 4                | 9.2%     | 1.000 | 0          | 0.0%     | 0.000 | 3          | 4.6%     | 1.000 | 1            | 1.9%     | 0.816 |                                                                            |          |      |              |       |        |                |        |       |             |        |        |  |
| FN0772 | 5                | 23.7%    | 1.000 | 0          | 0.0%     | 0.000 | 0          | 0.0%     |       | 1            | 7.1%     | 0.525 | AAL94968.1   Flavodoxin                                                    |          |      |              |       |        |                |        |       |             |        |        |  |
|        | 3                | 14.8%    | 0.999 | 2          | 12.4%    | 0.922 | 0          | 0.0%     |       | 2            | 12.4%    | 0.937 |                                                                            |          |      |              |       |        |                |        |       |             |        |        |  |
| FN0774 | 19               | 60.9%    | 1.000 | 10         | 48.0%    | 1.000 | 8          | 43.5%    | 1.000 | 18           | 63.7%    | 1.000 | AAL94970.1   Hypothetical cytosolic protein                                |          |      |              |       |        |                |        |       |             |        |        |  |
|        | 16               | 60.5%    | 1.000 | 12         | 52.4%    | 1.000 | 5          | 23.8%    | 1.000 | 14           | 60.5%    | 1.000 |                                                                            |          |      |              |       |        |                |        |       |             |        |        |  |
| FN0775 | 32               | 61.8%    | 1.000 | 25         | 49.2%    | 1.000 | 26         | 58.3%    | 1.000 | 30           | 65.5%    | 1.000 | AAL94971.1   Aspartyl aminopeptidase                                       |          |      |              |       |        |                |        |       |             |        |        |  |
|        | 33               | 62.2%    | 1.000 | 38         | 74.4%    | 1.000 | 29         | 66.4%    | 1.000 | 32           | 61.5%    | 1.000 |                                                                            |          |      |              |       |        |                |        |       |             |        |        |  |
| FN0776 | 17               | 52.6%    | 1.000 | 11         | 42.2%    | 1.000 | 17         | 58.4%    | 1.000 | 16           | 46.5%    | 1.000 | AAL94972.1   Aspartate-ammonia ligase                                      |          |      |              |       |        |                |        |       |             |        |        |  |
|        | 16               | 52.0%    | 1.000 | 17         | 59.0%    | 1.000 | 19         | 61.2%    | 1.000 | 13           | 41.9%    | 1.000 |                                                                            |          |      |              |       |        |                |        |       |             |        |        |  |

Show detected proteins only  
 Show all proteins  
 Filter by category:

Proteins found:  
1424

Enter (or paste) list of ORFs

Find ORFs

[Dot Plots](#) [Dot Plots](#)



| ORF    | Fn Summary Table |          |       | FnPg vs Fn |          |       | FnSg vs Fn |          |       | FnPgSg vs Fn |          |       | FnPgSg vs FnPg                                           |          |      | FnSg vs FnPg |       |        | FnPgSg vs FnSg |        |       | Fn Coverage |        |        |  |
|--------|------------------|----------|-------|------------|----------|-------|------------|----------|-------|--------------|----------|-------|----------------------------------------------------------|----------|------|--------------|-------|--------|----------------|--------|-------|-------------|--------|--------|--|
|        | Fn               |          |       | FnPg       |          |       | FnSg       |          |       | FnPgSg       |          |       | Description                                              |          |      |              | Fn    |        | FnPg           |        | FnSg  |             | FnPgSg |        |  |
|        | n                | coverage | prob  | n          | coverage | prob  | n          | coverage | prob  | n            | coverage | prob  | n                                                        | coverage | prob | Description  | Rep I | Rep II | Rep I          | Rep II | Rep I | Rep II      | Rep I  | Rep II |  |
| FN0777 | 15               | 32.5%    | 1.000 | 10         | 24.0%    | 1.000 | 20         | 41.6%    | 1.000 | 19           | 43.9%    | 1.000 | AAL94973.1  GTP-binding protein lepA                     |          |      |              |       |        |                |        |       |             |        |        |  |
|        | 14               | 30.8%    | 1.000 | 16         | 33.1%    | 1.000 | 15         | 39.6%    | 1.000 | 18           | 39.1%    | 1.000 |                                                          |          |      |              |       |        |                |        |       |             |        |        |  |
| FN0778 | 8                | 15.5%    | 1.000 | 5          | 16.7%    | 1.000 | 5          | 13.1%    | 1.000 | 2            | 3.4%     | 0.998 | AAL94974.1  Methyltransferase                            |          |      |              |       |        |                |        |       |             |        |        |  |
|        | 9                | 21.1%    | 1.000 | 10         | 22.1%    | 1.000 | 7          | 18.2%    | 1.000 | 5            | 10.2%    | 1.000 |                                                          |          |      |              |       |        |                |        |       |             |        |        |  |
| FN0779 | 1                | 3.7%     | 0.278 | 0          | 0.0%     | 0.000 | 4          | 20.7%    | 1.000 | 1            | 3.7%     | 0.989 | AAL94975.1  Putative GTPases (G3E family)                |          |      |              |       |        |                |        |       |             |        |        |  |
|        | 0                | 0.0%     | 0.000 | 3          | 11.6%    | 0.994 | 4          | 23.5%    | 1.000 | 1            | 3.7%     | 0.985 |                                                          |          |      |              |       |        |                |        |       |             |        |        |  |
| FN0783 | 41               | 74.3%    | 1.000 | 34         | 63.3%    | 1.000 | 28         | 74.3%    | 1.000 | 40           | 70.3%    | 1.000 | AAL94979.1  acyl-CoA dehydrogenase                       |          |      |              |       |        |                |        |       |             |        |        |  |
|        | 42               | 74.8%    | 1.000 | 37         | 78.5%    | 1.000 | 32         | 80.1%    | 1.000 | 40           | 71.7%    | 1.000 |                                                          |          |      |              |       |        |                |        |       |             |        |        |  |
| FN0784 | 36               | 69.8%    | 1.000 | 23         | 60.3%    | 1.000 | 26         | 80.9%    | 1.000 | 36           | 72.5%    | 1.000 | AAL94980.1  Electron transfer flavoprotein beta-subunit  |          |      |              |       |        |                |        |       |             |        |        |  |
|        | 33               | 66.4%    | 1.000 | 29         | 84.4%    | 1.000 | 28         | 85.5%    | 1.000 | 33           | 64.1%    | 1.000 |                                                          |          |      |              |       |        |                |        |       |             |        |        |  |
| FN0785 | 40               | 55.2%    | 1.000 | 29         | 61.9%    | 1.000 | 35         | 75.2%    | 1.000 | 40           | 66.2%    | 1.000 | AAL94981.1  Electron transfer flavoprotein alpha-subunit |          |      |              |       |        |                |        |       |             |        |        |  |
|        | 39               | 54.0%    | 1.000 | 33         | 63.2%    | 1.000 | 35         | 75.7%    | 1.000 | 38           | 54.2%    | 1.000 |                                                          |          |      |              |       |        |                |        |       |             |        |        |  |
| FN0788 | 8                | 46.8%    | 1.000 | 7          | 40.3%    | 1.000 | 4          | 34.5%    | 1.000 | 8            | 56.8%    | 1.000 | AAL94984.1  unknown                                      |          |      |              |       |        |                |        |       |             |        |        |  |
|        | 7                | 32.4%    | 1.000 | 9          | 59.0%    | 1.000 | 8          | 55.4%    | 1.000 | 6            | 46.8%    | 1.000 |                                                          |          |      |              |       |        |                |        |       |             |        |        |  |
| FN0790 | 7                | 16.0%    | 1.000 | 3          | 7.5%     | 1.000 | 7          | 33.3%    | 1.000 | 4            | 8.5%     | 1.000 | AAL94986.1  Xylose repressor                             |          |      |              |       |        |                |        |       |             |        |        |  |
|        | 5                | 16.5%    | 1.000 | 7          | 24.0%    | 1.000 | 10         | 29.5%    | 1.000 | 2            | 5.4%     | 0.956 |                                                          |          |      |              |       |        |                |        |       |             |        |        |  |
| FN0791 | 41               | 63.6%    | 1.000 | 30         | 54.3%    | 1.000 | 33         | 64.3%    | 1.000 | 34           | 60.9%    | 1.000 | AAL94987.1  Histidine ammonia-lyase                      |          |      |              |       |        |                |        |       |             |        |        |  |
|        | 41               | 60.3%    | 1.000 | 43         | 69.0%    | 1.000 | 35         | 64.3%    | 1.000 | 32           | 49.4%    | 1.000 |                                                          |          |      |              |       |        |                |        |       |             |        |        |  |
| FN0792 | 62               | 63.7%    | 1.000 | 55         | 68.8%    | 1.000 | 64         | 71.5%    | 1.000 | 56           | 65.5%    | 1.000 | AAL94988.1  Urocanate hydratase                          |          |      |              |       |        |                |        |       |             |        |        |  |
|        | 55               | 62.6%    | 1.000 | 67         | 72.5%    | 1.000 | 58         | 70.6%    | 1.000 | 64           | 73.3%    | 1.000 |                                                          |          |      |              |       |        |                |        |       |             |        |        |  |
| FN0793 | 4                | 15.8%    | 1.000 | 2          | 6.3%     | 1.000 | 1          | 4.5%     | 0.781 | 2            | 6.3%     | 0.999 | AAL94989.1  Sodium/glutamate symport carrier protein     |          |      |              |       |        |                |        |       |             |        |        |  |
|        | 3                | 15.8%    | 1.000 | 3          | 15.8%    | 1.000 | 1          | 4.5%     | 0.985 | 4            | 15.8%    | 1.000 |                                                          |          |      |              |       |        |                |        |       |             |        |        |  |
| FN0794 | 6                | 36.5%    | 1.000 | 2          | 20.4%    | 0.984 | 5          | 32.8%    | 1.000 | 3            | 20.4%    | 1.000 | AAL94990.1  Hypothetical protein                         |          |      |              |       |        |                |        |       |             |        |        |  |
|        | 5                | 41.6%    | 1.000 | 7          | 38.7%    | 1.000 | 5          | 32.8%    | 1.000 | 2            | 14.6%    | 0.994 |                                                          |          |      |              |       |        |                |        |       |             |        |        |  |
| FN0796 | 38               | 40.0%    | 1.000 | 28         | 30.2%    | 1.000 | 39         | 42.0%    | 1.000 | 39           | 48.3%    | 1.000 | AAL94992.1  Pyruvate,phosphate dikinase                  |          |      |              |       |        |                |        |       |             |        |        |  |
|        | 33               | 41.1%    | 1.000 | 50         | 49.6%    | 1.000 | 47         | 50.1%    | 1.000 | 32           | 37.6%    | 1.000 |                                                          |          |      |              |       |        |                |        |       |             |        |        |  |
| FN0798 | 3                | 5.4%     | 1.000 | 6          | 13.3%    | 1.000 | 12         | 22.9%    | 1.000 | 6            | 9.3%     | 1.000 | AAL94994.1  Fructose-1,6-bisphosphatase                  |          |      |              |       |        |                |        |       |             |        |        |  |
|        | 7                | 9.1%     | 1.000 | 7          | 12.1%    | 1.000 | 10         | 24.0%    | 1.000 | 4            | 6.0%     | 1.000 |                                                          |          |      |              |       |        |                |        |       |             |        |        |  |
| FN0799 | 5                | 13.6%    | 1.000 | 6          | 18.6%    | 1.000 | 6          | 14.7%    | 1.000 | 5            | 10.5%    | 1.000 | AAL94995.1  Isoamylase                                   |          |      |              |       |        |                |        |       |             |        |        |  |
|        | 3                | 7.6%     | 1.000 | 7          | 14.1%    | 1.000 | 10         | 24.2%    | 1.000 | 2            | 5.6%     | 0.996 |                                                          |          |      |              |       |        |                |        |       |             |        |        |  |
| FN0800 | 7                | 52.6%    | 1.000 | 3          | 20.9%    | 0.999 | 9          | 44.8%    | 1.000 | 9            | 47.0%    | 1.000 | AAL94996.1  Amino acid-binding protein                   |          |      |              |       |        |                |        |       |             |        |        |  |
|        | 9                | 46.5%    | 1.000 | 11         | 53.5%    | 1.000 | 10         | 44.8%    | 1.000 | 11           | 47.4%    | 1.000 |                                                          |          |      |              |       |        |                |        |       |             |        |        |  |

Show detected proteins only  
 Show all proteins  
 Filter by category:

Proteins found:  
1424

Enter (or paste) list of ORFs

Find ORFs

[Dot Plots](#) [Dot Plots](#)

| ORF    | Fn Summary Table |          |       | FnPg vs Fn |          |       | FnSg vs Fn |          |       | FnPgSg vs Fn |          |       | FnPgSg vs FnPg                                            |          |      | FnSg vs FnPg |       |        | FnPgSg vs FnSg |        |       | Fn Coverage |        |        |  |
|--------|------------------|----------|-------|------------|----------|-------|------------|----------|-------|--------------|----------|-------|-----------------------------------------------------------|----------|------|--------------|-------|--------|----------------|--------|-------|-------------|--------|--------|--|
|        | Fn               |          |       | FnPg       |          |       | FnSg       |          |       | FnPgSg       |          |       | Description                                               |          |      |              | Fn    |        | FnPg           |        | FnSg  |             | FnPgSg |        |  |
|        | n                | coverage | prob  | n          | coverage | prob  | n          | coverage | prob  | n            | coverage | prob  | n                                                         | coverage | prob | Description  | Rep I | Rep II | Rep I          | Rep II | Rep I | Rep II      | Rep I  | Rep II |  |
| FN0801 | 4                | 18.2%    | 1.000 | 0          | 0.0%     | 0.000 | 7          | 36.0%    | 1.000 | 1            | 9.9%     | 0.988 | AAL94997.1  Amino acid transport ATP-binding protein      |          |      |              |       |        |                |        |       |             |        |        |  |
|        | 4                | 27.3%    | 1.000 | 7          | 45.5%    | 1.000 | 7          | 43.4%    | 1.000 | 2            | 15.3%    | 0.992 |                                                           |          |      |              |       |        |                |        |       |             |        |        |  |
| FN0802 | 2                | 8.9%     | 0.503 | 0          | 0.0%     | 0.000 | 2          | 8.9%     | 1.000 | 0            | 0.0%     | 0.000 | AAL94998.1  Amino acid transport system permease protein  |          |      |              |       |        |                |        |       |             |        |        |  |
|        | 2                | 8.9%     | 0.984 | 4          | 19.1%    | 1.000 | 2          | 9.3%     | 0.997 | 1            | 4.2%     | 0.986 |                                                           |          |      |              |       |        |                |        |       |             |        |        |  |
| FN0803 | 27               | 44.0%    | 1.000 | 10         | 22.0%    | 1.000 | 13         | 20.3%    | 1.000 | 19           | 26.8%    | 1.000 | AAL94999.1  Cytochrome C-TYPE biogenesis protein ccdA     |          |      |              |       |        |                |        |       |             |        |        |  |
|        | 22               | 39.3%    | 1.000 | 21         | 37.6%    | 1.000 | 19         | 34.5%    | 1.000 | 20           | 32.6%    | 1.000 |                                                           |          |      |              |       |        |                |        |       |             |        |        |  |
| FN0805 | 2                | 9.6%     | 0.998 | 4          | 12.7%    | 1.000 | 6          | 23.9%    | 1.000 | 3            | 13.5%    | 1.000 | AAL95001.1  Hypothetical protein                          |          |      |              |       |        |                |        |       |             |        |        |  |
|        | 3                | 13.1%    | 0.999 | 4          | 18.7%    | 1.000 | 6          | 27.5%    | 1.000 | 3            | 14.3%    | 0.992 |                                                           |          |      |              |       |        |                |        |       |             |        |        |  |
| FN0806 | 18               | 61.3%    | 1.000 | 10         | 39.0%    | 1.000 | 17         | 57.7%    | 1.000 | 19           | 62.2%    | 1.000 | AAL95002.1  SpoIID homolog                                |          |      |              |       |        |                |        |       |             |        |        |  |
|        | 18               | 52.0%    | 1.000 | 19         | 64.3%    | 1.000 | 16         | 57.1%    | 1.000 | 17           | 62.5%    | 1.000 |                                                           |          |      |              |       |        |                |        |       |             |        |        |  |
| FN0807 | 10               | 38.8%    | 1.000 | 4          | 15.9%    | 1.000 | 6          | 29.4%    | 1.000 | 12           | 45.3%    | 1.000 | AAL95003.1  3-deoxy-manno-octulosonate cytidyltransferase |          |      |              |       |        |                |        |       |             |        |        |  |
|        | 8                | 29.4%    | 1.000 | 12         | 43.3%    | 1.000 | 6          | 23.7%    | 1.000 | 8            | 38.8%    | 1.000 |                                                           |          |      |              |       |        |                |        |       |             |        |        |  |
| FN0808 | 13               | 55.3%    | 1.000 | 8          | 35.4%    | 1.000 | 15         | 62.1%    | 1.000 | 13           | 55.3%    | 1.000 | AAL95004.1  Phosphoglycerate mutase                       |          |      |              |       |        |                |        |       |             |        |        |  |
|        | 11               | 49.5%    | 1.000 | 15         | 68.0%    | 1.000 | 16         | 62.1%    | 1.000 | 11           | 52.9%    | 1.000 |                                                           |          |      |              |       |        |                |        |       |             |        |        |  |
| FN0809 | 5                | 50.0%    | 1.000 | 2          | 22.7%    | 0.999 | 2          | 23.3%    | 1.000 | 3            | 32.0%    | 1.000 | AAL95005.1  23S rRNA methyltransferase                    |          |      |              |       |        |                |        |       |             |        |        |  |
|        | 4                | 45.3%    | 1.000 | 3          | 31.3%    | 0.998 | 5          | 40.7%    | 1.000 | 2            | 23.3%    | 0.996 |                                                           |          |      |              |       |        |                |        |       |             |        |        |  |
| FN0810 | 10               | 27.4%    | 1.000 | 9          | 32.9%    | 1.000 | 4          | 17.9%    | 1.000 | 7            | 26.2%    | 1.000 | AAL95006.1  Low-specificity threonine aldolase            |          |      |              |       |        |                |        |       |             |        |        |  |
|        | 10               | 32.9%    | 1.000 | 17         | 45.6%    | 1.000 | 11         | 35.0%    | 1.000 | 8            | 31.5%    | 1.000 |                                                           |          |      |              |       |        |                |        |       |             |        |        |  |
| FN0811 | 1                | 3.8%     | 0.559 | 1          | 5.7%     | 0.359 | 4          | 18.3%    | 1.000 | 0            | 0.0%     | 0.000 | AAL95007.1  Hypothetical protein                          |          |      |              |       |        |                |        |       |             |        |        |  |
|        | 1                | 3.8%     | 0.435 | 2          | 7.3%     | 0.977 | 3          | 14.5%    | 0.999 | 1            | 2.2%     | 0.387 |                                                           |          |      |              |       |        |                |        |       |             |        |        |  |
| FN0813 | 5                | 17.7%    | 1.000 | 0          | 0.0%     | 0.000 | 16         | 47.3%    | 1.000 | 7            | 19.6%    | 1.000 | AAL95009.1  Transcriptional regulator, TetR family        |          |      |              |       |        |                |        |       |             |        |        |  |
|        | 5                | 12.6%    | 1.000 | 13         | 33.9%    | 1.000 | 14         | 41.1%    | 1.000 | 3            | 9.4%     | 1.000 |                                                           |          |      |              |       |        |                |        |       |             |        |        |  |
| FN0814 | 28               | 46.2%    | 1.000 | 10         | 24.4%    | 1.000 | 6          | 14.4%    | 1.000 | 20           | 42.0%    | 1.000 | AAL95010.1  Propionate CoA-transferase                    |          |      |              |       |        |                |        |       |             |        |        |  |
|        | 26               | 46.2%    | 1.000 | 5          | 12.3%    | 1.000 | 7          | 14.8%    | 1.000 | 23           | 47.9%    | 1.000 |                                                           |          |      |              |       |        |                |        |       |             |        |        |  |
| FN0815 | 6                | 15.9%    | 1.000 | 1          | 1.8%     | 0.984 | 0          | 0.0%     | 0.000 | 8            | 17.7%    | 1.000 | AAL95011.1  Propionate permease                           |          |      |              |       |        |                |        |       |             |        |        |  |
|        | 6                | 15.2%    | 1.000 | 0          | 0.0%     | 0.000 | 2          | 8.9%     | 0.931 | 9            | 17.7%    | 1.000 |                                                           |          |      |              |       |        |                |        |       |             |        |        |  |
| FN0816 | 11               | 71.6%    | 1.000 | 6          | 58.2%    | 1.000 | 0          | 0.0%     | 0.000 | 8            | 59.7%    | 1.000 | AAL95012.1  dehydrogenase with MaoC-like domain           |          |      |              |       |        |                |        |       |             |        |        |  |
|        | 11               | 64.9%    | 1.000 | 1          | 6.7%     | 0.885 | 1          | 8.2%     | 0.967 | 8            | 44.0%    | 1.000 |                                                           |          |      |              |       |        |                |        |       |             |        |        |  |
| FN0818 | 8                | 41.8%    | 1.000 | 7          | 28.6%    | 1.000 | 3          | 28.6%    | 1.000 | 7            | 28.6%    | 1.000 | AAL95014.1  DNA-binding protein HU                        |          |      |              |       |        |                |        |       |             |        |        |  |
|        | 8                | 41.8%    | 1.000 | 5          | 40.7%    | 1.000 | 4          | 28.6%    | 1.000 | 7            | 28.6%    | 1.000 |                                                           |          |      |              |       |        |                |        |       |             |        |        |  |
| FN0819 | 16               | 24.7%    | 1.000 | 17         | 26.3%    | 1.000 | 16         | 28.1%    | 1.000 | 16           | 27.5%    | 1.000 | AAL95015.1  Tetratricopeptide repeat family protein       |          |      |              |       |        |                |        |       |             |        |        |  |
|        | 19               | 26.9%    | 1.000 | 13         | 17.7%    | 1.000 | 19         | 30.8%    | 1.000 | 15           | 26.2%    | 1.000 |                                                           |          |      |              |       |        |                |        |       |             |        |        |  |

Show detected proteins only  
 Show all proteins  
 Filter by category:

Proteins found:  
 1424

Enter (or paste) list of ORFs

| ORF    | Fn Summary Table |          |       | FnPg vs Fn |          |       | FnSg vs Fn |          |       | FnPgSg vs Fn |          |       | FnPgSg vs FnPg                                     |          |      | FnSg vs FnPg |       |        | FnPgSg vs FnSg |        |       | Fn Coverage |        |        |  |
|--------|------------------|----------|-------|------------|----------|-------|------------|----------|-------|--------------|----------|-------|----------------------------------------------------|----------|------|--------------|-------|--------|----------------|--------|-------|-------------|--------|--------|--|
|        | Fn               |          |       | FnPg       |          |       | FnSg       |          |       | FnPgSg       |          |       | Description                                        |          |      |              | Fn    |        | FnPg           |        | FnSg  |             | FnPgSg |        |  |
|        | n                | coverage | prob  | n          | coverage | prob  | n          | coverage | prob  | n            | coverage | prob  | n                                                  | coverage | prob | Description  | Rep I | Rep II | Rep I          | Rep II | Rep I | Rep II      | Rep I  | Rep II |  |
| FN0820 | 21               | 44.2%    | 1.000 | 16         | 33.1%    | 1.000 | 18         | 37.9%    | 1.000 | 21           | 48.8%    | 1.000 | AAL95016.1  Mercuric reductase                     |          |      |              |       |        |                |        |       |             |        |        |  |
|        | 23               | 48.4%    | 1.000 | 33         | 63.2%    | 1.000 | 24         | 49.2%    | 1.000 | 21           | 48.4%    | 1.000 |                                                    |          |      |              |       |        |                |        |       |             |        |        |  |
| FN0821 | 11               | 36.8%    | 1.000 | 5          | 27.8%    | 1.000 | 8          | 23.6%    | 1.000 | 11           | 34.0%    | 1.000 | AAL95017.1  Hypothetical protein                   |          |      |              |       |        |                |        |       |             |        |        |  |
|        | 11               | 27.4%    | 1.000 | 8          | 31.9%    | 1.000 | 6          | 24.7%    | 1.000 | 14           | 34.0%    | 1.000 |                                                    |          |      |              |       |        |                |        |       |             |        |        |  |
| FN0823 | 6                | 17.2%    | 1.000 | 5          | 14.8%    | 1.000 | 25         | 44.2%    | 1.000 | 11           | 21.0%    | 1.000 | AAL95019.1  GTP-binding protein hflX               |          |      |              |       |        |                |        |       |             |        |        |  |
|        | 9                | 24.2%    | 1.000 | 15         | 29.3%    | 1.000 | 24         | 43.7%    | 1.000 | 8            | 21.0%    | 1.000 |                                                    |          |      |              |       |        |                |        |       |             |        |        |  |
| FN0824 | 0                | 0.0%     | 0.000 | 0          | 0.0%     | 0.000 | 4          | 23.7%    | 1.000 | 1            | 4.6%     | 0.447 | AAL95020.1  hypothetical cytosolic protein         |          |      |              |       |        |                |        |       |             |        |        |  |
|        | 2                | 8.8%     | 0.957 | 1          | 3.9%     | 0.382 | 1          | 6.4%     | 0.351 | 1            | 3.9%     | 0.329 |                                                    |          |      |              |       |        |                |        |       |             |        |        |  |
| FN0825 | 17               | 42.4%    | 1.000 | 6          | 23.9%    | 1.000 | 12         | 31.5%    | 1.000 | 11           | 26.8%    | 1.000 | AAL95021.1  Hypothetical cytosolic protein         |          |      |              |       |        |                |        |       |             |        |        |  |
|        | 17               | 44.9%    | 1.000 | 19         | 48.8%    | 1.000 | 12         | 36.6%    | 1.000 | 9            | 29.8%    | 1.000 |                                                    |          |      |              |       |        |                |        |       |             |        |        |  |
| FN0826 | 12               | 49.4%    | 1.000 | 7          | 19.2%    | 1.000 | 7          | 30.8%    | 1.000 | 6            | 33.7%    | 1.000 | AAL95022.1  periplasmic component of efflux system |          |      |              |       |        |                |        |       |             |        |        |  |
|        | 18               | 64.5%    | 1.000 | 6          | 25.4%    | 1.000 | 4          | 18.9%    | 1.000 | 9            | 39.6%    | 1.000 |                                                    |          |      |              |       |        |                |        |       |             |        |        |  |
| FN0827 | 13               | 60.0%    | 1.000 | 3          | 23.6%    | 1.000 | 11         | 52.3%    | 1.000 | 6            | 41.4%    | 1.000 | AAL95023.1  ABC transporter ATP-binding protein    |          |      |              |       |        |                |        |       |             |        |        |  |
|        | 11               | 52.3%    | 1.000 | 6          | 37.3%    | 1.000 | 10         | 55.5%    | 1.000 | 7            | 40.9%    | 1.000 |                                                    |          |      |              |       |        |                |        |       |             |        |        |  |
| FN0828 | 7                | 17.6%    | 1.000 | 2          | 7.6%     | 0.999 | 4          | 12.7%    | 1.000 | 3            | 7.4%     | 1.000 | AAL95024.1  ABC transporter permease protein       |          |      |              |       |        |                |        |       |             |        |        |  |
|        | 4                | 14.7%    | 1.000 | 2          | 6.1%     | 1.000 | 3          | 10.0%    | 1.000 | 2            | 5.1%     | 0.992 |                                                    |          |      |              |       |        |                |        |       |             |        |        |  |
| FN0830 | 8                | 18.2%    | 1.000 | 14         | 27.6%    | 1.000 | 17         | 34.7%    | 1.000 | 8            | 18.2%    | 1.000 | AAL95026.1  Hypothetical protein                   |          |      |              |       |        |                |        |       |             |        |        |  |
|        | 13               | 29.5%    | 1.000 | 18         | 40.6%    | 1.000 | 20         | 41.2%    | 1.000 | 7            | 19.5%    | 1.000 |                                                    |          |      |              |       |        |                |        |       |             |        |        |  |
| FN0831 | 0                | 0.0%     |       | 5          | 6.9%     | 0.999 | 1          | 2.1%     | 0.947 | 1            | 2.0%     | 0.338 | AAL95027.1  Hemin receptor                         |          |      |              |       |        |                |        |       |             |        |        |  |
|        | 0                | 0.0%     |       | 4          | 11.7%    | 0.995 | 2          | 4.4%     | 0.776 | 2            | 5.3%     | 0.713 |                                                    |          |      |              |       |        |                |        |       |             |        |        |  |
| FN0832 | 15               | 79.2%    | 1.000 | 10         | 62.3%    | 1.000 | 4          | 40.9%    | 1.000 | 19           | 79.9%    | 1.000 | AAL95028.1  Hypothetical protein                   |          |      |              |       |        |                |        |       |             |        |        |  |
|        | 14               | 70.1%    | 1.000 | 8          | 59.1%    | 1.000 | 10         | 70.1%    | 1.000 | 11           | 70.8%    | 1.000 |                                                    |          |      |              |       |        |                |        |       |             |        |        |  |
| FN0833 | 17               | 39.5%    | 1.000 | 2          | 7.6%     | 1.000 | 14         | 33.2%    | 1.000 | 7            | 15.4%    | 1.000 | AAL95029.1  Hypothetical protein                   |          |      |              |       |        |                |        |       |             |        |        |  |
|        | 17               | 37.1%    | 1.000 | 4          | 10.0%    | 1.000 | 11         | 28.6%    | 1.000 | 10           | 22.8%    | 1.000 |                                                    |          |      |              |       |        |                |        |       |             |        |        |  |
| FN0834 | 12               | 23.9%    | 1.000 | 13         | 29.4%    | 1.000 | 5          | 14.1%    | 1.000 | 11           | 25.0%    | 1.000 | AAL95030.1  Hypothetical Exported Protein          |          |      |              |       |        |                |        |       |             |        |        |  |
|        | 15               | 28.2%    | 1.000 | 4          | 8.6%     | 1.000 | 9          | 14.5%    | 1.000 | 9            | 19.0%    | 1.000 |                                                    |          |      |              |       |        |                |        |       |             |        |        |  |
| FN0835 | 1                | 9.1%     | 0.872 | 5          | 19.2%    | 1.000 | 1          | 6.1%     | 0.983 | 1            | 4.0%     | 0.971 | AAL95031.1  Hypothetical protein                   |          |      |              |       |        |                |        |       |             |        |        |  |
|        | 2                | 15.2%    | 0.965 | 3          | 15.7%    | 1.000 | 2          | 11.6%    | 0.998 | 0            | 0.0%     | 0.000 |                                                    |          |      |              |       |        |                |        |       |             |        |        |  |
| FN0836 | 7                | 40.8%    | 1.000 | 10         | 53.1%    | 1.000 | 5          | 46.9%    | 1.000 | 4            | 30.6%    | 1.000 | AAL95032.1  Hypothetical protein                   |          |      |              |       |        |                |        |       |             |        |        |  |
|        | 6                | 40.8%    | 1.000 | 8          | 48.0%    | 1.000 | 5          | 31.6%    | 1.000 | 9            | 57.1%    | 1.000 |                                                    |          |      |              |       |        |                |        |       |             |        |        |  |
| FN0837 | 1                | 2.7%     | 0.258 | 0          | 0.0%     | 0.000 | 2          | 6.1%     | 0.902 | 2            | 5.2%     | 0.987 | AAL95033.1  Integrase/recombinase                  |          |      |              |       |        |                |        |       |             |        |        |  |
|        | 0                | 0.0%     | 0.000 | 2          | 5.8%     | 0.992 | 3          | 7.6%     | 0.973 | 0            | 0.0%     | 0.000 |                                                    |          |      |              |       |        |                |        |       |             |        |        |  |

Show detected proteins only  
 Show all proteins  
 Filter by category:

Proteins found:  
 1424

Enter (or paste) list of ORFs

| ORF    | Fn Summary Table |          |       | FnPg vs Fn |          |       | FnSg vs Fn |          |       | FnPgSg vs Fn |          |       | FnPgSg vs FnPg                                      |          |      | FnSg vs FnPg |       |        | FnPgSg vs FnSg |        |       | Fn Coverage |       |        |        |        |
|--------|------------------|----------|-------|------------|----------|-------|------------|----------|-------|--------------|----------|-------|-----------------------------------------------------|----------|------|--------------|-------|--------|----------------|--------|-------|-------------|-------|--------|--------|--------|
|        | Fn               |          |       | FnPg       |          |       | FnSg       |          |       | FnPgSg       |          |       | Description                                         |          |      |              |       |        | Fn             |        | FnPg  |             | FnSg  |        | FnPgSg |        |
|        | n                | coverage | prob  | n          | coverage | prob  | n          | coverage | prob  | n            | coverage | prob  | n                                                   | coverage | prob | Description  | Rep I | Rep II | Rep I          | Rep II | Rep I | Rep II      | Rep I | Rep II | Rep I  | Rep II |
| FN0846 | 20               | 56.2%    | 1.000 | 12         | 37.8%    | 1.000 | 15         | 47.7%    | 1.000 | 14           | 44.1%    | 1.000 | AAL95042.1  Hypothetical Exported Protein           |          |      |              |       |        |                |        |       |             |       |        |        |        |
|        | 19               | 55.3%    | 1.000 | 26         | 70.7%    | 1.000 | 15         | 47.7%    | 1.000 | 15           | 49.7%    | 1.000 |                                                     |          |      |              |       |        |                |        |       |             |       |        |        |        |
| FN0847 | 11               | 26.5%    | 1.000 | 1          | 2.3%     | 0.983 | 5          | 10.2%    | 1.000 | 5            | 12.4%    | 1.000 | AAL95043.1  TPR-repeat-containing proteins          |          |      |              |       |        |                |        |       |             |       |        |        |        |
|        | 11               | 20.7%    | 1.000 | 6          | 15.5%    | 1.000 | 7          | 18.5%    | 1.000 | 5            | 7.3%     | 1.000 |                                                     |          |      |              |       |        |                |        |       |             |       |        |        |        |
| FN0848 | 2                | 9.8%     | 0.924 | 3          | 25.5%    | 1.000 | 1          | 6.9%     | 0.985 | 1            | 3.4%     | 0.352 | AAL95044.1  Hypothetical protein                    |          |      |              |       |        |                |        |       |             |       |        |        |        |
|        | 1                | 4.9%     | 0.589 | 0          | 0.0%     | 0.000 | 1          | 6.9%     | 0.777 | 0            | 0.0%     | 0.000 |                                                     |          |      |              |       |        |                |        |       |             |       |        |        |        |
| FN0849 | 11               | 28.1%    | 1.000 | 7          | 24.1%    | 1.000 | 11         | 40.2%    | 1.000 | 7            | 20.2%    | 1.000 | AAL95045.1  8-amino-7-oxononanoate synthase         |          |      |              |       |        |                |        |       |             |       |        |        |        |
|        | 8                | 21.8%    | 1.000 | 12         | 39.1%    | 1.000 | 14         | 38.6%    | 1.000 | 7            | 17.1%    | 1.000 |                                                     |          |      |              |       |        |                |        |       |             |       |        |        |        |
| FN0850 | 5                | 21.4%    | 1.000 | 6          | 19.9%    | 1.000 | 10         | 46.4%    | 1.000 | 7            | 39.8%    | 1.000 | AAL95046.1  Hypothetical cytosolic protein          |          |      |              |       |        |                |        |       |             |       |        |        |        |
|        | 7                | 32.1%    | 1.000 | 9          | 45.4%    | 1.000 | 12         | 61.2%    | 1.000 | 4            | 19.9%    | 1.000 |                                                     |          |      |              |       |        |                |        |       |             |       |        |        |        |
| FN0853 | 14               | 31.2%    | 1.000 | 17         | 30.4%    | 1.000 | 21         | 40.6%    | 1.000 | 15           | 31.7%    | 1.000 | AAL95049.1  Glycogen synthase                       |          |      |              |       |        |                |        |       |             |       |        |        |        |
|        | 14               | 33.6%    | 1.000 | 23         | 43.8%    | 1.000 | 24         | 41.2%    | 1.000 | 15           | 33.4%    | 1.000 |                                                     |          |      |              |       |        |                |        |       |             |       |        |        |        |
| FN0854 | 17               | 53.2%    | 1.000 | 17         | 48.6%    | 1.000 | 21         | 55.8%    | 1.000 | 18           | 55.3%    | 1.000 | AAL95050.1  Glucose-1-phosphate adenylyltransferase |          |      |              |       |        |                |        |       |             |       |        |        |        |
|        | 18               | 53.0%    | 1.000 | 21         | 58.9%    | 1.000 | 20         | 53.0%    | 1.000 | 14           | 47.8%    | 1.000 |                                                     |          |      |              |       |        |                |        |       |             |       |        |        |        |
| FN0855 | 21               | 58.3%    | 1.000 | 19         | 50.3%    | 1.000 | 29         | 68.0%    | 1.000 | 27           | 56.5%    | 1.000 | AAL95051.1  Glucose-1-phosphate adenylyltransferase |          |      |              |       |        |                |        |       |             |       |        |        |        |
|        | 24               | 62.0%    | 1.000 | 36         | 83.9%    | 1.000 | 32         | 76.3%    | 1.000 | 24           | 53.9%    | 1.000 |                                                     |          |      |              |       |        |                |        |       |             |       |        |        |        |
| FN0856 | 18               | 32.2%    | 1.000 | 22         | 28.3%    | 1.000 | 24         | 35.0%    | 1.000 | 17           | 34.4%    | 1.000 | AAL95052.1  1,4-alpha-glucan branching enzyme       |          |      |              |       |        |                |        |       |             |       |        |        |        |
|        | 16               | 30.8%    | 1.000 | 31         | 41.9%    | 1.000 | 28         | 39.6%    | 1.000 | 13           | 25.4%    | 1.000 |                                                     |          |      |              |       |        |                |        |       |             |       |        |        |        |
| FN0857 | 39               | 46.5%    | 1.000 | 30         | 49.7%    | 1.000 | 54         | 62.2%    | 1.000 | 39           | 56.0%    | 1.000 | AAL95053.1  Glycogen phosphorylase                  |          |      |              |       |        |                |        |       |             |       |        |        |        |
|        | 38               | 48.7%    | 1.000 | 50         | 60.2%    | 1.000 | 52         | 59.3%    | 1.000 | 35           | 51.1%    | 1.000 |                                                     |          |      |              |       |        |                |        |       |             |       |        |        |        |
| FN0858 | 9                | 21.5%    | 1.000 | 10         | 24.9%    | 1.000 | 16         | 38.3%    | 1.000 | 3            | 8.7%     | 1.000 | AAL95054.1  4-alpha-glucanotransferase              |          |      |              |       |        |                |        |       |             |       |        |        |        |
|        | 11               | 27.1%    | 1.000 | 17         | 43.3%    | 1.000 | 24         | 48.8%    | 1.000 | 6            | 19.8%    | 1.000 |                                                     |          |      |              |       |        |                |        |       |             |       |        |        |        |
| FN0865 | 13               | 56.0%    | 1.000 | 3          | 9.1%     | 1.000 | 18         | 60.2%    | 1.000 | 4            | 15.8%    | 1.000 | AAL95061.1  unknown                                 |          |      |              |       |        |                |        |       |             |       |        |        |        |
|        | 9                | 30.3%    | 1.000 | 22         | 71.8%    | 1.000 | 18         | 55.2%    | 1.000 | 7            | 26.6%    | 1.000 |                                                     |          |      |              |       |        |                |        |       |             |       |        |        |        |
| FN0867 | 35               | 34.5%    | 1.000 | 8          | 10.0%    | 1.000 | 12         | 15.1%    | 1.000 | 24           | 26.0%    | 1.000 | AAL95063.1  Long-chain-fatty-acid--CoA ligase       |          |      |              |       |        |                |        |       |             |       |        |        |        |
|        | 30               | 27.6%    | 1.000 | 13         | 11.3%    | 1.000 | 20         | 22.2%    | 1.000 | 22           | 24.2%    | 1.000 |                                                     |          |      |              |       |        |                |        |       |             |       |        |        |        |
| FN0868 | 4                | 10.8%    | 1.000 | 1          | 11.9%    | 0.364 | 0          | 0.0%     | 0.000 | 2            | 7.9%     | 0.843 | AAL95064.1  ATPases of the PP superfamily           |          |      |              |       |        |                |        |       |             |       |        |        |        |
|        | 3                | 7.2%     | 1.000 | 0          | 0.0%     | 0.000 | 5          | 17.0%    | 1.000 | 2            | 5.8%     | 0.859 |                                                     |          |      |              |       |        |                |        |       |             |       |        |        |        |
| FN0869 | 2                | 14.8%    | 0.999 | 2          | 10.4%    | 0.993 | 4          | 17.0%    | 1.000 | 3            | 11.5%    | 0.998 | AAL95065.1  Hydrolase (HAD superfamily)             |          |      |              |       |        |                |        |       |             |       |        |        |        |
|        | 3                | 20.0%    | 1.000 | 4          | 21.5%    | 1.000 | 4          | 16.3%    | 1.000 | 2            | 7.0%     | 0.996 |                                                     |          |      |              |       |        |                |        |       |             |       |        |        |        |
| FN0870 | 2                | 7.5%     | 0.815 | 2          | 11.2%    | 0.989 | 0          | 0.0%     | 0.000 | 6            | 20.8%    | 1.000 | AAL95066.1  Rhodanese-related sulfurtransferases    |          |      |              |       |        |                |        |       |             |       |        |        |        |
|        | 3                | 7.5%     | 0.976 | 1          | 5.8%     | 0.983 | 1          | 5.8%     | 0.883 | 6            | 21.7%    | 1.000 |                                                     |          |      |              |       |        |                |        |       |             |       |        |        |        |

Show detected proteins only  
 Show all proteins  
 Filter by category:

Proteins found:  
 1424

Enter (or paste) list of ORFs

| ORF    | Fn Summary Table |          |       | FnPg vs Fn |          |       | FnSg vs Fn |          |       | FnPgSg vs Fn |          |       | FnPgSg vs FnPg                                               |          |      | FnSg vs FnPg |       |        | FnPgSg vs FnSg |        |       | Fn Coverage |        |        |  |
|--------|------------------|----------|-------|------------|----------|-------|------------|----------|-------|--------------|----------|-------|--------------------------------------------------------------|----------|------|--------------|-------|--------|----------------|--------|-------|-------------|--------|--------|--|
|        | Fn               |          |       | FnPg       |          |       | FnSg       |          |       | FnPgSg       |          |       | Description                                                  |          |      |              | Fn    |        | FnPg           |        | FnSg  |             | FnPgSg |        |  |
|        | n                | coverage | prob  | n          | coverage | prob  | n          | coverage | prob  | n            | coverage | prob  | n                                                            | coverage | prob | Description  | Rep I | Rep II | Rep I          | Rep II | Rep I | Rep II      | Rep I  | Rep II |  |
| FN0871 | 3                | 4.2%     | 0.999 | 2          | 4.4%     | 0.706 | 5          | 11.6%    | 1.000 | 6            | 11.3%    | 1.000 | AAL95067.1  3-dehydroquinate synthase                        |          |      |              |       |        |                |        |       |             |        |        |  |
|        | 3                | 6.5%     | 0.994 | 5          | 9.0%     | 1.000 | 6          | 14.0%    | 1.000 | 0            | 0.0%     | 0.000 |                                                              |          |      |              |       |        |                |        |       |             |        |        |  |
| FN0873 | 11               | 26.1%    | 1.000 | 9          | 19.4%    | 1.000 | 16         | 34.2%    | 1.000 | 8            | 21.3%    | 1.000 | AAL95069.1  Protease IV                                      |          |      |              |       |        |                |        |       |             |        |        |  |
|        | 11               | 25.3%    | 1.000 | 24         | 52.0%    | 1.000 | 13         | 27.1%    | 1.000 | 7            | 15.6%    | 1.000 |                                                              |          |      |              |       |        |                |        |       |             |        |        |  |
| FN0874 | 1                | 7.0%     | 0.744 | 0          | 0.0%     | 0.000 | 0          | 0.0%     | 0.000 | 0            | 0.0%     |       | AAL95070.1  Phosphohydrolase (MUTT/NUDIX family protein)     |          |      |              |       |        |                |        |       |             |        |        |  |
|        | 1                | 7.0%     | 0.936 | 6          | 24.0%    | 1.000 | 3          | 26.3%    | 0.999 | 0            | 0.0%     |       |                                                              |          |      |              |       |        |                |        |       |             |        |        |  |
| FN0875 | 1                | 8.8%     | 0.582 | 1          | 7.7%     | 0.396 | 3          | 13.0%    | 0.985 | 4            | 18.8%    | 0.940 | AAL95071.1  23S rRNA methyltransferase                       |          |      |              |       |        |                |        |       |             |        |        |  |
|        | 0                | 0.0%     | 0.000 | 2          | 7.7%     | 0.600 | 2          | 7.7%     | 0.885 | 1            | 8.0%     | 0.402 |                                                              |          |      |              |       |        |                |        |       |             |        |        |  |
| FN0878 | 6                | 28.5%    | 1.000 | 3          | 17.9%    | 1.000 | 8          | 30.6%    | 1.000 | 5            | 18.7%    | 1.000 | AAL95074.1  Transcriptional regulator, GntR family           |          |      |              |       |        |                |        |       |             |        |        |  |
|        | 6                | 26.0%    | 1.000 | 8          | 38.3%    | 1.000 | 7          | 25.5%    | 1.000 | 9            | 39.1%    | 1.000 |                                                              |          |      |              |       |        |                |        |       |             |        |        |  |
| FN0884 | 1                | 7.5%     | 0.340 | 1          | 6.7%     | 0.449 | 3          | 18.6%    | 0.733 | 1            | 6.7%     | 0.543 | AAL95079.1  Hemin transport system permease protein hmuU     |          |      |              |       |        |                |        |       |             |        |        |  |
|        | 0                | 0.0%     | 0.000 | 2          | 13.9%    | 0.872 | 0          | 0.0%     | 0.000 | 1            | 6.7%     | 0.958 |                                                              |          |      |              |       |        |                |        |       |             |        |        |  |
| FN0885 | 2                | 10.1%    | 0.998 | 0          | 0.0%     | 0.000 | 2          | 10.5%    | 0.934 | 1            | 4.5%     | 0.350 | AAL95081.1  Hemin-binding periplasmic protein hmuT precursor |          |      |              |       |        |                |        |       |             |        |        |  |
|        | 3                | 18.9%    | 0.999 | 0          | 0.0%     | 0.000 | 0          | 0.0%     | 0.000 | 0            | 0.0%     | 0.000 |                                                              |          |      |              |       |        |                |        |       |             |        |        |  |
| FN0886 | 8                | 13.3%    | 1.000 | 1          | 2.0%     | 0.473 | 2          | 3.8%     | 0.987 | 3            | 8.8%     | 1.000 | AAL95082.1  Hemin receptor                                   |          |      |              |       |        |                |        |       |             |        |        |  |
|        | 6                | 10.8%    | 1.000 | 1          | 1.4%     | 0.951 | 0          | 0.0%     | 0.000 | 2            | 3.3%     | 0.997 |                                                              |          |      |              |       |        |                |        |       |             |        |        |  |
| FN0887 | 13               | 21.2%    | 1.000 | 6          | 13.8%    | 1.000 | 10         | 22.7%    | 1.000 | 14           | 25.3%    | 1.000 | AAL95083.1  Oligoendopeptidase F                             |          |      |              |       |        |                |        |       |             |        |        |  |
|        | 14               | 21.5%    | 1.000 | 14         | 23.3%    | 1.000 | 11         | 24.7%    | 1.000 | 14           | 18.3%    | 1.000 |                                                              |          |      |              |       |        |                |        |       |             |        |        |  |
| FN0888 | 4                | 20.9%    | 1.000 | 3          | 16.2%    | 1.000 | 2          | 13.8%    | 1.000 | 3            | 13.8%    | 1.000 | AAL95084.1  Uracil permease                                  |          |      |              |       |        |                |        |       |             |        |        |  |
|        | 3                | 15.7%    | 1.000 | 3          | 18.2%    | 1.000 | 2          | 13.8%    | 1.000 | 3            | 13.8%    | 1.000 |                                                              |          |      |              |       |        |                |        |       |             |        |        |  |
| FN0889 | 4                | 56.7%    | 1.000 | 3          | 29.9%    | 1.000 | 2          | 17.3%    | 1.000 | 2            | 18.1%    | 0.994 | AAL95085.1  hypothetical protein                             |          |      |              |       |        |                |        |       |             |        |        |  |
|        | 3                | 34.6%    | 0.997 | 5          | 44.1%    | 1.000 | 5          | 35.4%    | 1.000 | 2            | 18.1%    | 0.994 |                                                              |          |      |              |       |        |                |        |       |             |        |        |  |
| FN0892 | 1                | 3.6%     | 0.757 | 0          | 0.0%     | 0.000 | 5          | 17.8%    | 1.000 | 2            | 4.0%     | 0.970 | AAL95088.1  Phosphoserine phosphatase                        |          |      |              |       |        |                |        |       |             |        |        |  |
|        | 0                | 0.0%     | 0.000 | 2          | 4.0%     | 0.991 | 4          | 18.6%    | 1.000 | 1            | 4.0%     | 0.320 |                                                              |          |      |              |       |        |                |        |       |             |        |        |  |
| FN0893 | 7                | 50.0%    | 1.000 | 1          | 8.6%     | 0.694 | 2          | 26.4%    | 0.997 | 6            | 37.1%    | 1.000 | AAL95089.1  Hypothetical protein                             |          |      |              |       |        |                |        |       |             |        |        |  |
|        | 5                | 39.3%    | 1.000 | 3          | 39.3%    | 1.000 | 3          | 26.4%    | 1.000 | 3            | 17.9%    | 1.000 |                                                              |          |      |              |       |        |                |        |       |             |        |        |  |
| FN0896 | 5                | 19.7%    | 1.000 | 3          | 19.7%    | 1.000 | 3          | 27.6%    | 1.000 | 5            | 39.4%    | 1.000 | AAL95092.1  Hypothetical protein                             |          |      |              |       |        |                |        |       |             |        |        |  |
|        | 5                | 26.0%    | 1.000 | 3          | 18.1%    | 0.998 | 4          | 18.1%    | 1.000 | 6            | 33.1%    | 1.000 |                                                              |          |      |              |       |        |                |        |       |             |        |        |  |
| FN0898 | 2                | 4.5%     | 0.997 | 1          | 2.1%     | 0.943 | 3          | 5.6%     | 0.992 | 1            | 2.2%     | 0.826 | AAL95094.1  Hypothetical protein                             |          |      |              |       |        |                |        |       |             |        |        |  |
|        | 2                | 4.5%     | 0.772 | 4          | 7.2%     | 0.994 | 4          | 7.9%     | 1.000 | 2            | 4.5%     | 0.535 |                                                              |          |      |              |       |        |                |        |       |             |        |        |  |
| FN0900 | 4                | 20.8%    | 0.983 | 3          | 15.4%    | 1.000 | 2          | 10.8%    | 1.000 | 2            | 8.5%     | 0.987 | AAL95096.1  Metal dependent hydrolase                        |          |      |              |       |        |                |        |       |             |        |        |  |
|        | 3                | 20.4%    | 0.989 | 3          | 19.6%    | 0.994 | 7          | 18.8%    | 1.000 | 2            | 15.0%    | 0.974 |                                                              |          |      |              |       |        |                |        |       |             |        |        |  |

Show detected proteins only  
 Show all proteins  
 Filter by category:

Proteins found:  
1424

Enter (or paste) list of ORFs

Find ORFs

[Dot Plots](#) [Dot Plots](#)

|        |    | Fn Summary Table |       | FnPg vs Fn |          | FnSg vs Fn |      | FnPgSg vs Fn |       | FnPgSg vs FnPg |          | FnSg vs FnPg |                                                                     | FnPgSg vs FnSg |      | Fn Coverage |        |       |        |       |        |       |        |  |
|--------|----|------------------|-------|------------|----------|------------|------|--------------|-------|----------------|----------|--------------|---------------------------------------------------------------------|----------------|------|-------------|--------|-------|--------|-------|--------|-------|--------|--|
| ORF    | Fn |                  |       | FnPg       |          |            | FnSg |              |       | FnPgSg         |          |              | Description                                                         |                |      |             | Fn     |       | FnPg   |       | FnSg   |       | FnPgSg |  |
|        | n  | coverage         | prob  | n          | coverage | prob       | n    | coverage     | prob  | n              | coverage | prob         | n                                                                   | coverage       | prob | Rep I       | Rep II | Rep I | Rep II | Rep I | Rep II | Rep I | Rep II |  |
| FN0901 | 1  | 9.7%             | 0.977 | 0          | 0.0%     | 0.000      | 6    | 40.0%        | 1.000 | 2              | 15.9%    | 0.994        | AAL95097.1   DNA polymerase, bacteriophage-type                     |                |      |             |        |       |        |       |        |       |        |  |
|        | 3  | 20.0%            | 0.992 | 7          | 38.5%    | 1.000      | 8    | 42.1%        | 1.000 | 1              | 8.2%     | 0.365        |                                                                     |                |      |             |        |       |        |       |        |       |        |  |
| FN0902 | 2  | 7.7%             | 0.979 | 1          | 7.2%     | 0.274      | 1    | 6.1%         | 0.634 | 3              | 20.4%    | 0.996        | AAL95098.1   5-formyltetrahydrofolate cyclo-ligase                  |                |      |             |        |       |        |       |        |       |        |  |
|        | 1  | 7.7%             | 0.606 | 1          | 6.1%     | 0.282      | 1    | 6.1%         | 0.343 | 4              | 22.1%    | 0.979        |                                                                     |                |      |             |        |       |        |       |        |       |        |  |
| FN0903 | 5  | 16.7%            | 1.000 | 6          | 23.5%    | 1.000      | 6    | 21.7%        | 1.000 | 5              | 16.7%    | 1.000        | AAL95099.1   Polysialic acid capsule expression protein kpsF        |                |      |             |        |       |        |       |        |       |        |  |
|        | 5  | 18.3%            | 1.000 | 7          | 21.7%    | 1.000      | 9    | 38.1%        | 1.000 | 6              | 24.1%    | 1.000        |                                                                     |                |      |             |        |       |        |       |        |       |        |  |
| FN0904 | 2  | 5.9%             | 0.999 | 0          | 0.0%     | 0.000      | 1    | 2.5%         | 0.322 | 1              | 3.0%     | 0.952        | AAL95100.1   NAD(FAD)-utilizing dehydrogenases                      |                |      |             |        |       |        |       |        |       |        |  |
|        | 2  | 4.6%             | 0.999 | 3          | 7.6%     | 1.000      | 0    | 0.0%         | 0.000 | 1              | 2.5%     | 0.691        |                                                                     |                |      |             |        |       |        |       |        |       |        |  |
| FN0905 | 4  | 41.6%            | 1.000 | 0          | 0.0%     | 0.000      | 1    | 9.9%         | 0.927 | 6              | 68.3%    | 1.000        | AAL95101.1   Hypothetical protein                                   |                |      |             |        |       |        |       |        |       |        |  |
|        | 3  | 33.7%            | 1.000 | 2          | 17.8%    | 0.990      | 1    | 9.9%         | 0.985 | 5              | 55.4%    | 1.000        |                                                                     |                |      |             |        |       |        |       |        |       |        |  |
| FN0906 | 11 | 34.6%            | 1.000 | 4          | 11.9%    | 1.000      | 15   | 47.5%        | 1.000 | 6              | 23.6%    | 1.000        | AAL95102.1   Glycerol-3-phosphate dehydrogenase [NAD (P)+]          |                |      |             |        |       |        |       |        |       |        |  |
|        | 10 | 31.0%            | 1.000 | 14         | 48.4%    | 1.000      | 13   | 35.8%        | 1.000 | 3              | 13.1%    | 1.000        |                                                                     |                |      |             |        |       |        |       |        |       |        |  |
| FN0908 | 8  | 26.3%            | 1.000 | 1          | 4.2%     | 0.936      | 8    | 25.6%        | 1.000 | 6              | 9.9%     | 1.000        | AAL95104.1   Tpl protein                                            |                |      |             |        |       |        |       |        |       |        |  |
|        | 9  | 22.4%            | 1.000 | 8          | 25.6%    | 1.000      | 9    | 25.3%        | 1.000 | 8              | 19.9%    | 1.000        |                                                                     |                |      |             |        |       |        |       |        |       |        |  |
| FN0909 | 0  | 0.0%             | 0.000 | 3          | 16.8%    | 1.000      | 0    | 0.0%         | 0.000 | 0              | 0.0%     |              | AAL95105.1   DNA repair protein radC                                |                |      |             |        |       |        |       |        |       |        |  |
|        | 1  | 10.8%            | 0.253 | 2          | 11.2%    | 0.865      | 1    | 7.3%         | 0.985 | 0              | 0.0%     |              |                                                                     |                |      |             |        |       |        |       |        |       |        |  |
| FN0910 | 3  | 12.7%            | 0.987 | 1          | 3.1%     | 0.528      | 3    | 9.9%         | 0.998 | 1              | 4.0%     | 0.612        | AAL95106.1   Nicotinate-nucleotide--dimethylbenzimidazole           |                |      |             |        |       |        |       |        |       |        |  |
|        | 3  | 9.0%             | 0.999 | 4          | 18.4%    | 1.000      | 6    | 29.4%        | 1.000 | 0              | 0.0%     | 0.000        |                                                                     |                |      |             |        |       |        |       |        |       |        |  |
| FN0911 | 3  | 16.2%            | 1.000 | 1          | 8.4%     | 0.970      | 3    | 16.2%        | 1.000 | 3              | 22.0%    | 1.000        | AAL95107.1   Alpha-ribazole-5'-phosphate phosphatase                |                |      |             |        |       |        |       |        |       |        |  |
|        | 5  | 27.7%            | 1.000 | 4          | 25.1%    | 1.000      | 3    | 25.1%        | 1.000 | 1              | 8.4%     | 0.986        |                                                                     |                |      |             |        |       |        |       |        |       |        |  |
| FN0912 | 2  | 10.4%            | 0.995 | 2          | 15.1%    | 0.843      | 3    | 8.6%         | 1.000 | 2              | 10.4%    | 0.997        | AAL95108.1   Cobalamin [5'-phosphate] synthase                      |                |      |             |        |       |        |       |        |       |        |  |
|        | 2  | 10.4%            | 0.987 | 6          | 23.7%    | 1.000      | 4    | 14.4%        | 1.000 | 1              | 5.0%     | 0.986        |                                                                     |                |      |             |        |       |        |       |        |       |        |  |
| FN0913 | 3  | 18.2%            | 0.996 | 1          | 12.3%    | 0.938      | 1    | 4.8%         | 0.784 | 3              | 25.7%    | 1.000        | AAL95109.1   Cobinamide kinase                                      |                |      |             |        |       |        |       |        |       |        |  |
|        | 3  | 23.0%            | 1.000 | 4          | 27.3%    | 1.000      | 5    | 36.4%        | 1.000 | 1              | 7.0%     | 0.969        |                                                                     |                |      |             |        |       |        |       |        |       |        |  |
| FN0915 | 5  | 20.7%            | 1.000 | 5          | 20.7%    | 1.000      | 6    | 31.7%        | 1.000 | 8              | 40.2%    | 1.000        | AAL95111.1   PTS system, N-acetylglucosamine-specific IIA component |                |      |             |        |       |        |       |        |       |        |  |
|        | 7  | 26.8%            | 1.000 | 9          | 40.9%    | 1.000      | 5    | 24.4%        | 1.000 | 7              | 34.1%    | 1.000        |                                                                     |                |      |             |        |       |        |       |        |       |        |  |
| FN0916 | 16 | 71.1%            | 1.000 | 9          | 53.7%    | 1.000      | 17   | 75.8%        | 1.000 | 16             | 71.1%    | 1.000        | AAL95112.1   Hypothetical Exported Protein                          |                |      |             |        |       |        |       |        |       |        |  |
|        | 16 | 71.8%            | 1.000 | 16         | 75.8%    | 1.000      | 15   | 71.8%        | 1.000 | 17             | 71.1%    | 1.000        |                                                                     |                |      |             |        |       |        |       |        |       |        |  |
| FN0917 | 4  | 11.8%            | 1.000 | 2          | 8.7%     | 0.990      | 4    | 16.1%        | 1.000 | 1              | 3.1%     | 0.967        | AAL95113.1   Hypothetical protein                                   |                |      |             |        |       |        |       |        |       |        |  |
|        | 3  | 12.1%            | 0.999 | 3          | 9.0%     | 0.984      | 8    | 23.6%        | 1.000 | 3              | 9.6%     | 0.992        |                                                                     |                |      |             |        |       |        |       |        |       |        |  |
| FN0920 | 2  | 10.7%            | 0.999 | 0          | 0.0%     | 0.000      | 2    | 10.7%        | 0.998 | 5              | 22.0%    | 1.000        | AAL95116.1   Protease HTPX                                          |                |      |             |        |       |        |       |        |       |        |  |
|        | 4  | 16.2%            | 1.000 | 3          | 16.2%    | 1.000      | 0    | 0.0%         | 0.000 | 3              | 14.6%    | 1.000        |                                                                     |                |      |             |        |       |        |       |        |       |        |  |

Show detected proteins only  
 Show all proteins  
 Filter by category:

Proteins found:  
 1424

Enter (or paste) list of ORFs



| ORF    | Fn Summary Table |          |       | FnPg vs Fn |          |       | FnSg vs Fn |          |       | FnPgSg vs Fn |          |       | FnPgSg vs FnPg                                           |          |      | FnSg vs FnPg |       |        | FnPgSg vs FnSg |        |       | Fn Coverage |        |        |  |
|--------|------------------|----------|-------|------------|----------|-------|------------|----------|-------|--------------|----------|-------|----------------------------------------------------------|----------|------|--------------|-------|--------|----------------|--------|-------|-------------|--------|--------|--|
|        | Fn               |          |       | FnPg       |          |       | FnSg       |          |       | FnPgSg       |          |       | Description                                              |          |      |              | Fn    |        | FnPg           |        | FnSg  |             | FnPgSg |        |  |
|        | n                | coverage | prob  | n          | coverage | prob  | n          | coverage | prob  | n            | coverage | prob  | n                                                        | coverage | prob | Description  | Rep I | Rep II | Rep I          | Rep II | Rep I | Rep II      | Rep I  | Rep II |  |
| FN0921 | 3                | 13.9%    | 0.999 | 2          | 3.9%     | 1.000 | 9          | 25.9%    | 1.000 | 4            | 11.3%    | 1.000 | AAL95117.1  Hypothetical protein                         |          |      |              |       |        |                |        |       |             |        |        |  |
|        | 5                | 11.7%    | 1.000 | 10         | 31.7%    | 1.000 | 10         | 31.7%    | 1.000 | 5            | 15.2%    | 1.000 |                                                          |          |      |              |       |        |                |        |       |             |        |        |  |
| FN0922 | 1                | 6.1%     | 0.317 | 0          | 0.0%     |       | 1          | 2.9%     | 0.741 | 3            | 14.7%    | 0.855 | AAL95118.1  Homoserine kinase                            |          |      |              |       |        |                |        |       |             |        |        |  |
|        | 0                | 0.0%     | 0.000 | 0          | 0.0%     |       | 0          | 0.0%     | 0.000 | 0            | 0.0%     | 0.000 |                                                          |          |      |              |       |        |                |        |       |             |        |        |  |
| FN0923 | 0                | 0.0%     |       | 0          | 0.0%     | 0.000 | 2          | 4.0%     | 0.994 | 0            | 0.0%     | 0.000 | AAL95119.1  Cardiolipin synthetase                       |          |      |              |       |        |                |        |       |             |        |        |  |
|        | 0                | 0.0%     |       | 3          | 8.4%     | 0.974 | 2          | 3.5%     | 0.981 | 1            | 1.7%     | 0.969 |                                                          |          |      |              |       |        |                |        |       |             |        |        |  |
| FN0924 | 1                | 5.3%     | 0.741 | 1          | 5.7%     | 0.290 | 1          | 5.3%     | 0.604 | 0            | 0.0%     | 0.000 | AAL95120.1  Hypothetical protein                         |          |      |              |       |        |                |        |       |             |        |        |  |
|        | 1                | 5.3%     | 0.909 | 1          | 5.3%     | 0.980 | 1          | 5.3%     | 0.984 | 3            | 15.3%    | 0.936 |                                                          |          |      |              |       |        |                |        |       |             |        |        |  |
| FN0925 | 4                | 17.1%    | 1.000 | 2          | 12.0%    | 0.996 | 3          | 17.1%    | 0.998 | 4            | 17.5%    | 1.000 | AAL95121.1  Hypothetical protein                         |          |      |              |       |        |                |        |       |             |        |        |  |
|        | 3                | 14.0%    | 0.999 | 4          | 19.9%    | 0.999 | 6          | 26.4%    | 1.000 | 3            | 13.4%    | 0.995 |                                                          |          |      |              |       |        |                |        |       |             |        |        |  |
| FN0926 | 3                | 13.5%    | 0.996 | 7          | 26.6%    | 1.000 | 11         | 42.9%    | 1.000 | 6            | 31.3%    | 1.000 | AAL95122.1  GTP pyrophosphokinase                        |          |      |              |       |        |                |        |       |             |        |        |  |
|        | 2                | 11.2%    | 1.000 | 8          | 38.2%    | 1.000 | 12         | 45.9%    | 1.000 | 5            | 24.7%    | 1.000 |                                                          |          |      |              |       |        |                |        |       |             |        |        |  |
| FN0928 | 3                | 24.8%    | 1.000 | 2          | 14.0%    | 0.989 | 3          | 22.9%    | 0.996 | 4            | 19.2%    | 1.000 | AAL95124.1  O-sialoglycoprotein endopeptidase            |          |      |              |       |        |                |        |       |             |        |        |  |
|        | 2                | 17.8%    | 0.999 | 7          | 46.3%    | 1.000 | 6          | 36.9%    | 1.000 | 3            | 20.6%    | 1.000 |                                                          |          |      |              |       |        |                |        |       |             |        |        |  |
| FN0929 | 1                | 6.5%     | 0.955 | 4          | 23.5%    | 1.000 | 3          | 15.7%    | 1.000 | 2            | 15.7%    | 0.998 | AAL95125.1  ATP/GTP hydrolase                            |          |      |              |       |        |                |        |       |             |        |        |  |
|        | 2                | 15.7%    | 0.998 | 3          | 15.7%    | 1.000 | 3          | 15.7%    | 1.000 | 3            | 15.7%    | 0.995 |                                                          |          |      |              |       |        |                |        |       |             |        |        |  |
| FN0930 | 7                | 35.6%    | 1.000 | 3          | 36.9%    | 1.000 | 2          | 25.6%    | 0.925 | 1            | 6.9%     | 0.615 | AAL95126.1  Glycerol-3-phosphate cytidyltransferase      |          |      |              |       |        |                |        |       |             |        |        |  |
|        | 4                | 30.0%    | 1.000 | 3          | 34.4%    | 0.993 | 3          | 34.4%    | 1.000 | 2            | 15.6%    | 0.905 |                                                          |          |      |              |       |        |                |        |       |             |        |        |  |
| FN0932 | 6                | 19.8%    | 1.000 | 0          | 0.0%     | 0.000 | 3          | 7.8%     | 1.000 | 4            | 20.4%    | 0.999 | AAL95128.1  Hypothetical protein                         |          |      |              |       |        |                |        |       |             |        |        |  |
|        | 7                | 20.4%    | 1.000 | 5          | 16.2%    | 1.000 | 6          | 22.2%    | 1.000 | 3            | 19.8%    | 0.996 |                                                          |          |      |              |       |        |                |        |       |             |        |        |  |
| FN0933 | 0                | 0.0%     | 0.000 | 2          | 8.0%     | 0.989 | 0          | 0.0%     | 0.000 | 3            | 10.1%    | 0.998 | AAL95129.1  3-phosphoshikimate 1-carboxyvinyltransferase |          |      |              |       |        |                |        |       |             |        |        |  |
|        | 1                | 3.8%     | 0.979 | 1          | 4.2%     | 0.898 | 1          | 2.8%     | 0.958 | 1            | 5.9%     | 0.346 |                                                          |          |      |              |       |        |                |        |       |             |        |        |  |
| FN0934 | 3                | 12.9%    | 1.000 | 1          | 4.2%     | 0.981 | 4          | 11.8%    | 1.000 | 1            | 3.4%     | 0.988 | AAL95130.1  Chorismate synthase                          |          |      |              |       |        |                |        |       |             |        |        |  |
|        | 4                | 27.7%    | 1.000 | 7          | 17.9%    | 1.000 | 9          | 33.9%    | 1.000 | 0            | 0.0%     | 0.000 |                                                          |          |      |              |       |        |                |        |       |             |        |        |  |
| FN0938 | 1                | 8.4%     | 0.942 | 0          | 0.0%     | 0.000 | 8          | 55.0%    | 1.000 | 1            | 4.6%     | 0.571 | AAL95134.1  Hypothetical protein                         |          |      |              |       |        |                |        |       |             |        |        |  |
|        | 1                | 8.4%     | 0.982 | 10         | 60.7%    | 1.000 | 6          | 34.7%    | 1.000 | 1            | 8.4%     | 0.983 |                                                          |          |      |              |       |        |                |        |       |             |        |        |  |
| FN0940 | 1                | 5.1%     | 0.295 | 1          | 13.0%    | 0.627 | 4          | 27.7%    | 1.000 | 5            | 34.5%    | 1.000 | AAL95136.1  Hypothetical protein                         |          |      |              |       |        |                |        |       |             |        |        |  |
|        | 1                | 5.1%     | 0.352 | 5          | 32.8%    | 1.000 | 6          | 32.8%    | 1.000 | 4            | 16.9%    | 1.000 |                                                          |          |      |              |       |        |                |        |       |             |        |        |  |
| FN0941 | 10               | 18.3%    | 1.000 | 12         | 19.7%    | 1.000 | 15         | 28.0%    | 1.000 | 12           | 23.0%    | 1.000 | AAL95137.1  Gamma-glutamyltranspeptidase                 |          |      |              |       |        |                |        |       |             |        |        |  |
|        | 8                | 16.8%    | 1.000 | 21         | 37.7%    | 1.000 | 15         | 26.3%    | 1.000 | 14           | 25.4%    | 1.000 |                                                          |          |      |              |       |        |                |        |       |             |        |        |  |
| FN0943 | 5                | 27.9%    | 1.000 | 0          | 0.0%     | 0.000 | 6          | 34.8%    | 1.000 | 5            | 25.0%    | 1.000 | AAL95139.1  Sensory Transduction Protein Kinase          |          |      |              |       |        |                |        |       |             |        |        |  |
|        | 4                | 21.6%    | 1.000 | 9          | 48.0%    | 1.000 | 8          | 38.2%    | 1.000 | 3            | 13.7%    | 1.000 |                                                          |          |      |              |       |        |                |        |       |             |        |        |  |

Show detected proteins only  
 Show all proteins  
 Filter by category:

Proteins found:  
 1424

Enter (or paste) list of ORFs

| ORF    | Fn Summary Table |          |       | FnPg vs Fn |          |       | FnSg vs Fn |          |       | FnPgSg vs Fn |          |       | FnPgSg vs FnPg                                                     |          |      | FnSg vs FnPg |       |        | FnPgSg vs FnSg |        |       | Fn Coverage |       |        |        |        |
|--------|------------------|----------|-------|------------|----------|-------|------------|----------|-------|--------------|----------|-------|--------------------------------------------------------------------|----------|------|--------------|-------|--------|----------------|--------|-------|-------------|-------|--------|--------|--------|
|        | Fn               |          |       | FnPg       |          |       | FnSg       |          |       | FnPgSg       |          |       | Description                                                        |          |      |              |       |        | Fn             |        | FnPg  |             | FnSg  |        | FnPgSg |        |
|        | n                | coverage | prob  | n          | coverage | prob  | n          | coverage | prob  | n            | coverage | prob  | n                                                                  | coverage | prob | Description  | Rep I | Rep II | Rep I          | Rep II | Rep I | Rep II      | Rep I | Rep II | Rep I  | Rep II |
| FN0944 | 2                | 7.9%     | 0.954 | 1          | 4.0%     | 0.290 | 1          | 6.8%     | 0.616 | 1            | 3.1%     | 0.854 | AAL95140.1  Na+ driven multidrug efflux pump                       |          |      |              |       |        |                |        |       |             |       |        |        |        |
|        | 1                | 2.0%     | 0.975 | 3          | 16.9%    | 0.804 | 2          | 8.8%     | 0.773 | 1            | 3.1%     | 0.434 |                                                                    |          |      |              |       |        |                |        |       |             |       |        |        |        |
| FN0947 | 10               | 43.3%    | 1.000 | 9          | 30.4%    | 1.000 | 8          | 35.9%    | 1.000 | 10           | 40.7%    | 1.000 | AAL95143.1  Hypothetical protein                                   |          |      |              |       |        |                |        |       |             |       |        |        |        |
|        | 11               | 48.1%    | 1.000 | 9          | 40.7%    | 1.000 | 10         | 44.8%    | 1.000 | 10           | 40.7%    | 1.000 |                                                                    |          |      |              |       |        |                |        |       |             |       |        |        |        |
| FN0949 | 62               | 44.9%    | 1.000 | 35         | 28.7%    | 1.000 | 24         | 18.0%    | 1.000 | 53           | 34.9%    | 1.000 | AAL95145.1  DNA helicase                                           |          |      |              |       |        |                |        |       |             |       |        |        |        |
|        | 70               | 46.9%    | 1.000 | 19         | 15.1%    | 1.000 | 28         | 21.0%    | 1.000 | 47           | 32.8%    | 1.000 |                                                                    |          |      |              |       |        |                |        |       |             |       |        |        |        |
| FN0951 | 5                | 17.3%    | 1.000 | 3          | 18.9%    | 1.000 | 2          | 8.8%     | 0.998 | 2            | 11.6%    | 1.000 | AAL95147.1  Precorrin-3B C17-methyltransferase                     |          |      |              |       |        |                |        |       |             |       |        |        |        |
|        | 6                | 17.3%    | 1.000 | 6          | 26.5%    | 1.000 | 3          | 15.7%    | 1.000 | 2            | 11.6%    | 1.000 |                                                                    |          |      |              |       |        |                |        |       |             |       |        |        |        |
| FN0952 | 0                | 0.0%     | 0.000 | 1          | 5.9%     | 0.631 | 0          | 0.0%     | 0.000 | 1            | 5.9%     | 0.919 | AAL95148.1  Cobalamin biosynthesis protein G                       |          |      |              |       |        |                |        |       |             |       |        |        |        |
|        | 4                | 18.4%    | 1.000 | 1          | 4.2%     | 0.983 | 1          | 3.9%     | 0.363 | 1            | 5.9%     | 0.721 |                                                                    |          |      |              |       |        |                |        |       |             |       |        |        |        |
| FN0957 | 5                | 21.0%    | 1.000 | 6          | 30.4%    | 1.000 | 3          | 11.7%    | 1.000 | 6            | 28.4%    | 1.000 | AAL95153.1  Precorrin-4 C11-methyltransferase                      |          |      |              |       |        |                |        |       |             |       |        |        |        |
|        | 4                | 21.4%    | 1.000 | 8          | 38.5%    | 1.000 | 7          | 29.2%    | 1.000 | 5            | 20.6%    | 1.000 |                                                                    |          |      |              |       |        |                |        |       |             |       |        |        |        |
| FN0958 | 7                | 28.8%    | 1.000 | 6          | 21.7%    | 1.000 | 2          | 15.9%    | 0.996 | 1            | 3.1%     | 0.351 | AAL95154.1  unknown                                                |          |      |              |       |        |                |        |       |             |       |        |        |        |
|        | 5                | 21.7%    | 1.000 | 1          | 9.3%     | 0.904 | 4          | 15.9%    | 0.999 | 2            | 9.7%     | 0.990 |                                                                    |          |      |              |       |        |                |        |       |             |       |        |        |        |
| FN0959 | 6                | 31.5%    | 1.000 | 6          | 25.4%    | 1.000 | 2          | 4.8%     | 0.989 | 6            | 27.8%    | 1.000 | AAL95155.1  Precorrin-2 C20-methyltransferase                      |          |      |              |       |        |                |        |       |             |       |        |        |        |
|        | 6                | 26.2%    | 1.000 | 4          | 21.8%    | 1.000 | 3          | 13.3%    | 1.000 | 6            | 35.1%    | 1.000 |                                                                    |          |      |              |       |        |                |        |       |             |       |        |        |        |
| FN0961 | 3                | 24.7%    | 1.000 | 3          | 23.4%    | 1.000 | 2          | 11.0%    | 1.000 | 2            | 19.5%    | 0.996 | AAL95157.1  Hypothetical protein                                   |          |      |              |       |        |                |        |       |             |       |        |        |        |
|        | 3                | 24.7%    | 1.000 | 4          | 23.4%    | 1.000 | 3          | 16.2%    | 1.000 | 1            | 4.5%     | 0.800 |                                                                    |          |      |              |       |        |                |        |       |             |       |        |        |        |
| FN0962 | 11               | 49.8%    | 1.000 | 8          | 41.0%    | 1.000 | 5          | 24.7%    | 1.000 | 8            | 34.8%    | 1.000 | AAL95158.1  Hypothetical cytosolic protein                         |          |      |              |       |        |                |        |       |             |       |        |        |        |
|        | 8                | 31.3%    | 1.000 | 9          | 45.4%    | 1.000 | 7          | 29.1%    | 1.000 | 7            | 31.3%    | 1.000 |                                                                    |          |      |              |       |        |                |        |       |             |       |        |        |        |
| FN0964 | 1                | 6.3%     | 0.977 | 3          | 12.7%    | 1.000 | 3          | 12.2%    | 1.000 | 1            | 6.3%     | 0.973 | AAL95160.1  Precorrin-8W decarboxylase                             |          |      |              |       |        |                |        |       |             |       |        |        |        |
|        | 1                | 6.3%     | 0.871 | 4          | 20.1%    | 1.000 | 3          | 11.1%    | 1.000 | 3            | 11.1%    | 1.000 |                                                                    |          |      |              |       |        |                |        |       |             |       |        |        |        |
| FN0965 | 8                | 32.4%    | 1.000 | 10         | 40.2%    | 1.000 | 13         | 42.7%    | 1.000 | 12           | 32.1%    | 1.000 | AAL95161.1  D-3-phosphoglycerate dehydrogenase                     |          |      |              |       |        |                |        |       |             |       |        |        |        |
|        | 9                | 37.7%    | 1.000 | 13         | 36.4%    | 1.000 | 13         | 42.1%    | 1.000 | 14           | 39.6%    | 1.000 |                                                                    |          |      |              |       |        |                |        |       |             |       |        |        |        |
| FN0966 | 1                | 4.4%     | 0.536 | 1          | 4.8%     | 0.806 | 2          | 7.4%     | 0.896 | 1            | 7.9%     | 0.967 | AAL95162.1  Precorrin-6Y C5,15-methyltransferase (decarboxylating) |          |      |              |       |        |                |        |       |             |       |        |        |        |
|        | 0                | 0.0%     | 0.000 | 3          | 15.3%    | 1.000 | 3          | 15.3%    | 1.000 | 1            | 3.9%     | 0.971 |                                                                    |          |      |              |       |        |                |        |       |             |       |        |        |        |
| FN0967 | 2                | 5.3%     | 0.998 | 4          | 14.7%    | 1.000 | 1          | 4.5%     | 0.333 | 3            | 12.0%    | 0.999 | AAL95163.1  CbiD protein                                           |          |      |              |       |        |                |        |       |             |       |        |        |        |
|        | 2                | 5.3%     | 0.998 | 2          | 7.5%     | 0.627 | 4          | 14.7%    | 0.933 | 1            | 4.5%     | 0.304 |                                                                    |          |      |              |       |        |                |        |       |             |       |        |        |        |
| FN0970 | 4                | 22.8%    | 1.000 | 8          | 51.1%    | 1.000 | 3          | 12.8%    | 1.000 | 4            | 22.8%    | 1.000 | AAL95166.1  Precorrin-8X methylmutase                              |          |      |              |       |        |                |        |       |             |       |        |        |        |
|        | 6                | 27.9%    | 1.000 | 2          | 12.3%    | 1.000 | 8          | 48.9%    | 1.000 | 4            | 22.8%    | 1.000 |                                                                    |          |      |              |       |        |                |        |       |             |       |        |        |        |
| FN0971 | 0                | 0.0%     | 0.000 | 1          | 4.2%     | 0.925 | 3          | 11.2%    | 0.931 | 0            | 0.0%     |       | AAL95167.1  hypothetical cytosolic protein                         |          |      |              |       |        |                |        |       |             |       |        |        |        |
|        | 1                | 2.1%     | 0.397 | 0          | 0.0%     | 0.000 | 2          | 8.8%     | 0.738 | 0            | 0.0%     |       |                                                                    |          |      |              |       |        |                |        |       |             |       |        |        |        |

Show detected proteins only  
 Show all proteins  
 Filter by category:

Proteins found:  
1424

Enter (or paste) list of ORFs

Find ORFs

[Dot Plots](#) [Dot Plots](#)

| ORF    | Fn Summary Table |          |       | FnPg vs Fn |          |       | FnSg vs Fn |          |       | FnPgSg vs Fn |          |       | FnPgSg vs FnPg                                                           |          |      | FnSg vs FnPg |       |        | FnPgSg vs FnSg |        |       | Fn Coverage |        |        |  |
|--------|------------------|----------|-------|------------|----------|-------|------------|----------|-------|--------------|----------|-------|--------------------------------------------------------------------------|----------|------|--------------|-------|--------|----------------|--------|-------|-------------|--------|--------|--|
|        | Fn               |          |       | FnPg       |          |       | FnSg       |          |       | FnPgSg       |          |       | Description                                                              |          |      |              | Fn    |        | FnPg           |        | FnSg  |             | FnPgSg |        |  |
|        | n                | coverage | prob  | n          | coverage | prob  | n          | coverage | prob  | n            | coverage | prob  | n                                                                        | coverage | prob | Description  | Rep I | Rep II | Rep I          | Rep II | Rep I | Rep II      | Rep I  | Rep II |  |
| FN0972 | 1                | 2.9%     | 0.372 | 3          | 11.7%    | 0.999 | 3          | 11.0%    | 1.000 | 1            | 1.8%     | 0.988 | AAL95168.1  Cobyric acid a,c-diamide synthase                            |          |      |              |       |        |                |        |       |             |        |        |  |
|        | 1                | 4.1%     | 0.264 | 9          | 26.4%    | 1.000 | 10         | 30.9%    | 1.000 | 1            | 3.4%     | 0.624 |                                                                          |          |      |              |       |        |                |        |       |             |        |        |  |
| FN0974 | 2                | 19.0%    | 0.987 | 2          | 29.6%    | 0.998 | 1          | 11.3%    | 0.985 | 2            | 19.0%    | 0.956 | AAL95170.1  Lactoylglutathione lyase                                     |          |      |              |       |        |                |        |       |             |        |        |  |
|        | 2                | 19.0%    | 0.951 | 3          | 29.6%    | 1.000 | 1          | 11.3%    | 0.974 | 1            | 11.3%    | 0.974 |                                                                          |          |      |              |       |        |                |        |       |             |        |        |  |
| FN0976 | 12               | 44.9%    | 1.000 | 12         | 52.1%    | 1.000 | 10         | 41.3%    | 1.000 | 12           | 48.9%    | 1.000 | AAL95172.1  Hypothetical protein                                         |          |      |              |       |        |                |        |       |             |        |        |  |
|        | 13               | 47.5%    | 1.000 | 11         | 43.3%    | 1.000 | 12         | 53.8%    | 1.000 | 9            | 43.6%    | 1.000 |                                                                          |          |      |              |       |        |                |        |       |             |        |        |  |
| FN0977 | 3                | 14.1%    | 0.993 | 3          | 7.7%     | 0.996 | 9          | 29.4%    | 1.000 | 4            | 13.1%    | 1.000 | AAL95173.1  Cobyric acid synthase                                        |          |      |              |       |        |                |        |       |             |        |        |  |
|        | 2                | 8.3%     | 0.821 | 7          | 20.2%    | 1.000 | 9          | 22.0%    | 1.000 | 5            | 12.5%    | 1.000 |                                                                          |          |      |              |       |        |                |        |       |             |        |        |  |
| FN0981 | 21               | 42.0%    | 1.000 | 12         | 22.5%    | 1.000 | 16         | 39.2%    | 1.000 | 25           | 47.2%    | 1.000 | AAL95177.1  Phosphoribosylamine--glycine ligase                          |          |      |              |       |        |                |        |       |             |        |        |  |
|        | 23               | 38.0%    | 1.000 | 24         | 50.2%    | 1.000 | 13         | 33.6%    | 1.000 | 22           | 38.7%    | 1.000 |                                                                          |          |      |              |       |        |                |        |       |             |        |        |  |
| FN0982 | 30               | 51.2%    | 1.000 | 19         | 37.3%    | 1.000 | 29         | 52.0%    | 1.000 | 32           | 53.6%    | 1.000 | AAL95178.1  Phosphoribosylaminoimidazolecarboxamide formyltransferase    |          |      |              |       |        |                |        |       |             |        |        |  |
|        | 34               | 52.8%    | 1.000 | 38         | 65.3%    | 1.000 | 35         | 56.7%    | 1.000 | 30           | 60.5%    | 1.000 |                                                                          |          |      |              |       |        |                |        |       |             |        |        |  |
| FN0983 | 13               | 46.1%    | 1.000 | 12         | 47.7%    | 1.000 | 12         | 46.1%    | 1.000 | 11           | 46.1%    | 1.000 | AAL95179.1  Hypothetical protein                                         |          |      |              |       |        |                |        |       |             |        |        |  |
|        | 13               | 46.1%    | 1.000 | 12         | 50.0%    | 1.000 | 13         | 46.1%    | 1.000 | 12           | 46.1%    | 1.000 |                                                                          |          |      |              |       |        |                |        |       |             |        |        |  |
| FN0984 | 7                | 30.1%    | 1.000 | 9          | 37.5%    | 1.000 | 12         | 38.7%    | 1.000 | 4            | 16.0%    | 1.000 | AAL95180.1  Tetracenomycin polyketide synthesis O-methyltransferase tcmP |          |      |              |       |        |                |        |       |             |        |        |  |
|        | 6                | 30.1%    | 1.000 | 11         | 35.7%    | 1.000 | 11         | 35.7%    | 1.000 | 4            | 18.6%    | 1.000 |                                                                          |          |      |              |       |        |                |        |       |             |        |        |  |
| FN0985 | 4                | 14.4%    | 1.000 | 0          | 0.0%     | 0.000 | 7          | 42.2%    | 1.000 | 5            | 35.6%    | 1.000 | AAL95181.1  Phosphoribosylglycinamide formyltransferase                  |          |      |              |       |        |                |        |       |             |        |        |  |
|        | 3                | 23.3%    | 1.000 | 3          | 12.2%    | 1.000 | 7          | 41.7%    | 1.000 | 4            | 23.3%    | 1.000 |                                                                          |          |      |              |       |        |                |        |       |             |        |        |  |
| FN0986 | 14               | 38.1%    | 1.000 | 9          | 37.8%    | 1.000 | 12         | 35.7%    | 1.000 | 18           | 40.4%    | 1.000 | AAL95182.1  Phosphoribosylformylglycinamide cyclo-ligase                 |          |      |              |       |        |                |        |       |             |        |        |  |
|        | 11               | 35.4%    | 1.000 | 18         | 47.8%    | 1.000 | 15         | 51.3%    | 1.000 | 19           | 42.8%    | 1.000 |                                                                          |          |      |              |       |        |                |        |       |             |        |        |  |
| FN0987 | 24               | 49.1%    | 1.000 | 9          | 26.3%    | 1.000 | 24         | 48.9%    | 1.000 | 18           | 47.5%    | 1.000 | AAL95183.1  Amidophosphoribosyltransferase                               |          |      |              |       |        |                |        |       |             |        |        |  |
|        | 27               | 69.2%    | 1.000 | 26         | 56.5%    | 1.000 | 25         | 52.5%    | 1.000 | 20           | 53.1%    | 1.000 |                                                                          |          |      |              |       |        |                |        |       |             |        |        |  |
| FN0988 | 26               | 66.2%    | 1.000 | 22         | 62.9%    | 1.000 | 20         | 63.7%    | 1.000 | 23           | 65.8%    | 1.000 | AAL95184.1  Phosphoribosylamidoimidazole-succinocarboxamide synthase     |          |      |              |       |        |                |        |       |             |        |        |  |
|        | 25               | 57.4%    | 1.000 | 25         | 71.7%    | 1.000 | 25         | 67.9%    | 1.000 | 22           | 70.9%    | 1.000 |                                                                          |          |      |              |       |        |                |        |       |             |        |        |  |
| FN0989 | 16               | 73.9%    | 1.000 | 12         | 68.8%    | 1.000 | 12         | 73.9%    | 1.000 | 14           | 73.2%    | 1.000 | AAL95185.1  Phosphoribosylaminoimidazole carboxylase catalytic subunit   |          |      |              |       |        |                |        |       |             |        |        |  |
|        | 16               | 73.9%    | 1.000 | 15         | 73.9%    | 1.000 | 16         | 75.2%    | 1.000 | 11           | 73.2%    | 1.000 |                                                                          |          |      |              |       |        |                |        |       |             |        |        |  |
| FN0990 | 92               | 63.7%    | 1.000 | 52         | 46.0%    | 1.000 | 97         | 70.8%    | 1.000 | 98           | 66.3%    | 1.000 | AAL95186.1  Phosphoribosylformylglycinamide synthase                     |          |      |              |       |        |                |        |       |             |        |        |  |
|        | 83               | 59.0%    | 1.000 | 97         | 65.2%    | 1.000 | 98         | 66.1%    | 1.000 | 98           | 68.5%    | 1.000 |                                                                          |          |      |              |       |        |                |        |       |             |        |        |  |
| FN0991 | 4                | 18.4%    | 1.000 | 3          | 22.6%    | 1.000 | 4          | 22.6%    | 1.000 | 6            | 26.8%    | 1.000 | AAL95187.1  CDP-diacylglycerol--serine O-phosphatidyltransferase         |          |      |              |       |        |                |        |       |             |        |        |  |
|        | 5                | 18.4%    | 1.000 | 6          | 26.8%    | 1.000 | 4          | 26.8%    | 1.000 | 4            | 16.5%    | 1.000 |                                                                          |          |      |              |       |        |                |        |       |             |        |        |  |
| FN0992 | 14               | 43.9%    | 1.000 | 5          | 27.1%    | 1.000 | 11         | 45.8%    | 1.000 | 8            | 27.9%    | 1.000 | AAL95188.1  ADP-heptose:LPS heptosyltransferase II                       |          |      |              |       |        |                |        |       |             |        |        |  |
|        | 9                | 28.8%    | 1.000 | 9          | 27.1%    | 1.000 | 14         | 43.9%    | 1.000 | 10           | 33.5%    | 1.000 |                                                                          |          |      |              |       |        |                |        |       |             |        |        |  |

Show detected proteins only  
 Show all proteins  
 Filter by category:

Proteins found:  
 1424

Enter (or paste) list of ORFs

| ORF    | Fn Summary Table |          |       | FnPg vs Fn |          |       | FnSg vs Fn |          |       | FnPgSg vs Fn |          |       | FnPgSg vs FnPg                                                          |          |      | FnSg vs FnPg |       |        | FnPgSg vs FnSg |        |       | Fn Coverage |        |        |  |
|--------|------------------|----------|-------|------------|----------|-------|------------|----------|-------|--------------|----------|-------|-------------------------------------------------------------------------|----------|------|--------------|-------|--------|----------------|--------|-------|-------------|--------|--------|--|
|        | Fn               |          |       | FnPg       |          |       | FnSg       |          |       | FnPgSg       |          |       | Description                                                             |          |      |              | Fn    |        | FnPg           |        | FnSg  |             | FnPgSg |        |  |
|        | n                | coverage | prob  | n          | coverage | prob  | n          | coverage | prob  | n            | coverage | prob  | n                                                                       | coverage | prob | Description  | Rep I | Rep II | Rep I          | Rep II | Rep I | Rep II      | Rep I  | Rep II |  |
| FN0994 | 13               | 43.2%    | 1.000 | 9          | 44.8%    | 1.000 | 13         | 43.2%    | 1.000 | 18           | 58.5%    | 1.000 | AAL95190.1  Hypothetical protein                                        |          |      |              |       |        |                |        |       |             |        |        |  |
|        | 14               | 49.4%    | 1.000 | 17         | 59.8%    | 1.000 | 17         | 46.9%    | 1.000 | 14           | 46.5%    | 1.000 |                                                                         |          |      |              |       |        |                |        |       |             |        |        |  |
| FN0997 | 6                | 28.2%    | 1.000 | 4          | 17.6%    | 1.000 | 16         | 58.8%    | 1.000 | 11           | 51.4%    | 1.000 | AAL95193.1  Hypothetical protein                                        |          |      |              |       |        |                |        |       |             |        |        |  |
|        | 6                | 20.4%    | 1.000 | 14         | 61.1%    | 1.000 | 14         | 53.7%    | 1.000 | 9            | 46.8%    | 1.000 |                                                                         |          |      |              |       |        |                |        |       |             |        |        |  |
| FN0998 | 29               | 49.6%    | 1.000 | 19         | 40.6%    | 1.000 | 33         | 58.2%    | 1.000 | 27           | 50.8%    | 1.000 | AAL95194.1  Dipeptide-binding protein                                   |          |      |              |       |        |                |        |       |             |        |        |  |
|        | 31               | 52.2%    | 1.000 | 37         | 62.4%    | 1.000 | 36         | 57.6%    | 1.000 | 25           | 47.2%    | 1.000 |                                                                         |          |      |              |       |        |                |        |       |             |        |        |  |
| FN0999 | 12               | 36.0%    | 1.000 | 3          | 7.2%     | 1.000 | 12         | 34.9%    | 1.000 | 4            | 14.4%    | 1.000 | AAL95195.1  Deblocking aminopeptidase                                   |          |      |              |       |        |                |        |       |             |        |        |  |
|        | 9                | 26.2%    | 1.000 | 21         | 51.6%    | 1.000 | 14         | 49.3%    | 1.000 | 4            | 20.5%    | 1.000 |                                                                         |          |      |              |       |        |                |        |       |             |        |        |  |
| FN1000 | 13               | 36.9%    | 1.000 | 4          | 18.1%    | 1.000 | 2          | 10.3%    | 0.915 | 9            | 40.8%    | 1.000 | AAL95196.1  Biotin synthase                                             |          |      |              |       |        |                |        |       |             |        |        |  |
|        | 13               | 45.6%    | 1.000 | 1          | 9.2%     | 0.983 | 2          | 13.9%    | 1.000 | 10           | 43.9%    | 1.000 |                                                                         |          |      |              |       |        |                |        |       |             |        |        |  |
| FN1001 | 9                | 36.5%    | 1.000 | 5          | 24.2%    | 1.000 | 13         | 57.1%    | 1.000 | 9            | 39.3%    | 1.000 | AAL95197.1  Dethiobiotin synthetase                                     |          |      |              |       |        |                |        |       |             |        |        |  |
|        | 8                | 30.1%    | 1.000 | 13         | 56.2%    | 1.000 | 16         | 65.8%    | 1.000 | 7            | 31.5%    | 1.000 |                                                                         |          |      |              |       |        |                |        |       |             |        |        |  |
| FN1002 | 18               | 50.9%    | 1.000 | 21         | 57.3%    | 1.000 | 10         | 29.4%    | 1.000 | 13           | 36.3%    | 1.000 | AAL95198.1  Adenosylmethionine -8-amino-7-oxononanoate aminotransferase |          |      |              |       |        |                |        |       |             |        |        |  |
|        | 19               | 49.3%    | 1.000 | 15         | 43.6%    | 1.000 | 12         | 33.8%    | 1.000 | 15           | 39.8%    | 1.000 |                                                                         |          |      |              |       |        |                |        |       |             |        |        |  |
| FN1003 | 10               | 45.4%    | 1.000 | 4          | 15.8%    | 1.000 | 15         | 59.0%    | 1.000 | 10           | 42.5%    | 1.000 | AAL95199.1  Outer membrane protein P1 precursor                         |          |      |              |       |        |                |        |       |             |        |        |  |
|        | 7                | 28.6%    | 1.000 | 25         | 81.7%    | 1.000 | 20         | 72.9%    | 1.000 | 10           | 42.1%    | 1.000 |                                                                         |          |      |              |       |        |                |        |       |             |        |        |  |
| FN1004 | 4                | 23.4%    | 1.000 | 5          | 27.1%    | 1.000 | 5          | 33.0%    | 1.000 | 5            | 28.7%    | 1.000 | AAL95200.1  Transcriptional regulator, TetR family                      |          |      |              |       |        |                |        |       |             |        |        |  |
|        | 5                | 28.2%    | 1.000 | 3          | 18.6%    | 1.000 | 4          | 27.1%    | 1.000 | 4            | 23.4%    | 1.000 |                                                                         |          |      |              |       |        |                |        |       |             |        |        |  |
| FN1005 | 9                | 35.7%    | 1.000 | 1          | 7.6%     | 0.787 | 7          | 49.7%    | 1.000 | 6            | 35.0%    | 1.000 | AAL95201.1  Hypothetical protein                                        |          |      |              |       |        |                |        |       |             |        |        |  |
|        | 9                | 35.7%    | 1.000 | 9          | 43.9%    | 1.000 | 8          | 56.1%    | 1.000 | 12           | 53.5%    | 1.000 |                                                                         |          |      |              |       |        |                |        |       |             |        |        |  |
| FN1006 | 1                | 6.8%     | 0.237 | 1          | 11.4%    | 0.852 | 0          | 0.0%     | 0.000 | 0            | 0.0%     |       | AAL95202.1  Acetyltransferase                                           |          |      |              |       |        |                |        |       |             |        |        |  |
|        | 1                | 6.8%     | 0.451 | 7          | 47.0%    | 1.000 | 4          | 37.9%    | 1.000 | 0            | 0.0%     |       |                                                                         |          |      |              |       |        |                |        |       |             |        |        |  |
| FN1008 | 3                | 13.4%    | 0.997 | 1          | 5.6%     | 0.300 | 1          | 7.8%     | 0.985 | 0            | 0.0%     | 0.000 | AAL95204.1  Hypothetical protein                                        |          |      |              |       |        |                |        |       |             |        |        |  |
|        | 1                | 4.5%     | 0.259 | 2          | 8.4%     | 0.727 | 1          | 5.6%     | 0.615 | 1            | 4.5%     | 0.657 |                                                                         |          |      |              |       |        |                |        |       |             |        |        |  |
| FN1009 | 3                | 16.7%    | 1.000 | 0          | 0.0%     |       | 1          | 7.9%     | 0.903 | 1            | 8.8%     | 0.516 | AAL95205.1  Hypothetical protein                                        |          |      |              |       |        |                |        |       |             |        |        |  |
|        | 3                | 16.7%    | 0.990 | 0          | 0.0%     |       | 1          | 7.9%     | 0.978 | 0            | 0.0%     | 0.000 |                                                                         |          |      |              |       |        |                |        |       |             |        |        |  |
| FN1010 | 17               | 90.8%    | 1.000 | 10         | 72.4%    | 1.000 | 17         | 81.6%    | 1.000 | 16           | 89.8%    | 1.000 | AAL95206.1  Hypothetical cytosolic protein                              |          |      |              |       |        |                |        |       |             |        |        |  |
|        | 18               | 90.8%    | 1.000 | 21         | 100.0%   | 1.000 | 16         | 90.8%    | 1.000 | 17           | 89.8%    | 1.000 |                                                                         |          |      |              |       |        |                |        |       |             |        |        |  |
| FN1011 | 4                | 16.2%    | 1.000 | 4          | 16.2%    | 1.000 | 5          | 27.1%    | 1.000 | 2            | 9.7%     | 0.999 | AAL95207.1  MGPA protein                                                |          |      |              |       |        |                |        |       |             |        |        |  |
|        | 3                | 16.2%    | 1.000 | 7          | 20.9%    | 1.000 | 6          | 23.7%    | 1.000 | 3            | 12.8%    | 1.000 |                                                                         |          |      |              |       |        |                |        |       |             |        |        |  |
| FN1012 | 8                | 10.2%    | 1.000 | 4          | 3.6%     | 1.000 | 11         | 16.4%    | 1.000 | 7            | 15.8%    | 1.000 | AAL95208.1  HPR(Ser) kinase                                             |          |      |              |       |        |                |        |       |             |        |        |  |
|        | 7                | 8.0%     | 1.000 | 12         | 17.9%    | 1.000 | 16         | 26.5%    | 1.000 | 4            | 6.8%     | 1.000 |                                                                         |          |      |              |       |        |                |        |       |             |        |        |  |

Show detected proteins only  
 Show all proteins  
 Filter by category:

Proteins found:  
 1424

Enter (or paste) list of ORFs

| ORF    | Fn Summary Table |          |       | FnPg vs Fn |          |       | FnSg vs Fn |          |       | FnPgSg vs Fn |          |       | FnPgSg vs FnPg                                               |          |      | FnSg vs FnPg |       |        | FnPgSg vs FnSg |        |       | Fn Coverage |        |        |  |
|--------|------------------|----------|-------|------------|----------|-------|------------|----------|-------|--------------|----------|-------|--------------------------------------------------------------|----------|------|--------------|-------|--------|----------------|--------|-------|-------------|--------|--------|--|
|        | Fn               |          |       | FnPg       |          |       | FnSg       |          |       | FnPgSg       |          |       | Description                                                  |          |      |              | Fn    |        | FnPg           |        | FnSg  |             | FnPgSg |        |  |
|        | n                | coverage | prob  | n          | coverage | prob  | n          | coverage | prob  | n            | coverage | prob  | n                                                            | coverage | prob | Description  | Rep I | Rep II | Rep I          | Rep II | Rep I | Rep II      | Rep I  | Rep II |  |
| FN1014 | 9                | 19.0%    | 1.000 | 1          | 4.8%     | 0.363 | 9          | 28.2%    | 1.000 | 3            | 8.4%     | 1.000 | AAL95210.1  Folylpolylglutamyl synthase                      |          |      |              |       |        |                |        |       |             |        |        |  |
|        | 7                | 18.6%    | 1.000 | 9          | 24.8%    | 1.000 | 7          | 22.9%    | 1.000 | 5            | 10.8%    | 1.000 |                                                              |          |      |              |       |        |                |        |       |             |        |        |  |
| FN1015 | 3                | 17.3%    | 1.000 | 1          | 6.3%     | 0.531 | 4          | 29.1%    | 1.000 | 5            | 30.0%    | 1.000 | AAL95211.1  5'-methylthioadenosine nucleosidase              |          |      |              |       |        |                |        |       |             |        |        |  |
|        | 6                | 22.8%    | 1.000 | 8          | 43.5%    | 1.000 | 7          | 35.4%    | 1.000 | 4            | 23.2%    | 1.000 |                                                              |          |      |              |       |        |                |        |       |             |        |        |  |
| FN1016 | 6                | 13.7%    | 1.000 | 3          | 9.7%     | 1.000 | 10         | 52.7%    | 1.000 | 3            | 8.8%     | 1.000 | AAL95212.1  Lipid A biosynthesis lauroyl acyltransferase     |          |      |              |       |        |                |        |       |             |        |        |  |
|        | 7                | 19.5%    | 1.000 | 9          | 35.4%    | 1.000 | 10         | 44.7%    | 1.000 | 3            | 8.8%     | 1.000 |                                                              |          |      |              |       |        |                |        |       |             |        |        |  |
| FN1017 | 18               | 55.5%    | 1.000 | 11         | 45.6%    | 1.000 | 19         | 57.0%    | 1.000 | 17           | 55.5%    | 1.000 | AAL95213.1  Hypothetical Exported Protein                    |          |      |              |       |        |                |        |       |             |        |        |  |
|        | 19               | 61.4%    | 1.000 | 19         | 66.9%    | 1.000 | 18         | 61.4%    | 1.000 | 17           | 58.8%    | 1.000 |                                                              |          |      |              |       |        |                |        |       |             |        |        |  |
| FN1019 | 19               | 41.2%    | 1.000 | 22         | 68.1%    | 1.000 | 23         | 71.3%    | 1.000 | 21           | 58.8%    | 1.000 | AAL95215.1  3-hydroxybutyryl-CoA dehydrogenase               |          |      |              |       |        |                |        |       |             |        |        |  |
|        | 19               | 41.9%    | 1.000 | 26         | 75.3%    | 1.000 | 23         | 71.3%    | 1.000 | 20           | 54.8%    | 1.000 |                                                              |          |      |              |       |        |                |        |       |             |        |        |  |
| FN1020 | 14               | 52.7%    | 1.000 | 16         | 73.6%    | 1.000 | 19         | 77.5%    | 1.000 | 18           | 63.6%    | 1.000 | AAL95216.1  3-hydroxybutyryl-CoA dehydratase                 |          |      |              |       |        |                |        |       |             |        |        |  |
|        | 16               | 55.4%    | 1.000 | 18         | 64.7%    | 1.000 | 18         | 79.5%    | 1.000 | 19           | 75.2%    | 1.000 |                                                              |          |      |              |       |        |                |        |       |             |        |        |  |
| FN1022 | 9                | 10.8%    | 1.000 | 2          | 5.6%     | 0.943 | 2          | 4.2%     | 0.947 | 7            | 8.4%     | 1.000 | AAL95218.1  Calcium-transporting ATPase                      |          |      |              |       |        |                |        |       |             |        |        |  |
|        | 7                | 6.7%     | 1.000 | 1          | 0.8%     | 0.751 | 2          | 2.3%     | 0.899 | 6            | 8.5%     | 1.000 |                                                              |          |      |              |       |        |                |        |       |             |        |        |  |
| FN1023 | 1                | 6.4%     | 0.935 | 2          | 17.3%    | 0.998 | 4          | 26.3%    | 1.000 | 3            | 30.1%    | 1.000 | AAL95219.1  5-Nitroimidazole antibiotic resistance protein   |          |      |              |       |        |                |        |       |             |        |        |  |
|        | 2                | 14.7%    | 0.919 | 6          | 40.4%    | 1.000 | 5          | 34.6%    | 1.000 | 2            | 14.7%    | 0.999 |                                                              |          |      |              |       |        |                |        |       |             |        |        |  |
| FN1024 | 15               | 54.9%    | 1.000 | 16         | 54.9%    | 1.000 | 15         | 66.7%    | 1.000 | 14           | 52.9%    | 1.000 | AAL95220.1  DNA-binding protein HU                           |          |      |              |       |        |                |        |       |             |        |        |  |
|        | 15               | 54.9%    | 1.000 | 14         | 59.8%    | 1.000 | 14         | 66.7%    | 1.000 | 12           | 49.0%    | 1.000 |                                                              |          |      |              |       |        |                |        |       |             |        |        |  |
| FN1025 | 3                | 7.1%     | 1.000 | 0          | 0.0%     | 0.000 | 1          | 2.1%     | 0.985 | 4            | 9.4%     | 1.000 | AAL95221.1  Guanine-hypoxanthine permease                    |          |      |              |       |        |                |        |       |             |        |        |  |
|        | 4                | 9.0%     | 1.000 | 5          | 12.2%    | 1.000 | 3          | 7.8%     | 0.995 | 4            | 9.4%     | 1.000 |                                                              |          |      |              |       |        |                |        |       |             |        |        |  |
| FN1026 | 4                | 14.9%    | 1.000 | 0          | 0.0%     | 0.000 | 2          | 9.3%     | 0.992 | 2            | 6.9%     | 0.961 | AAL95222.1  tRNA pseudouridine synthase A                    |          |      |              |       |        |                |        |       |             |        |        |  |
|        | 4                | 14.9%    | 1.000 | 0          | 0.0%     | 0.000 | 5          | 15.2%    | 1.000 | 1            | 4.5%     | 0.982 |                                                              |          |      |              |       |        |                |        |       |             |        |        |  |
| FN1028 | 11               | 66.4%    | 1.000 | 7          | 39.7%    | 1.000 | 6          | 49.3%    | 1.000 | 11           | 63.0%    | 1.000 | AAL95224.1  Deoxyuridine 5'-triphosphate nucleotidohydrolase |          |      |              |       |        |                |        |       |             |        |        |  |
|        | 8                | 61.0%    | 1.000 | 8          | 42.5%    | 1.000 | 7          | 37.0%    | 1.000 | 11           | 62.3%    | 1.000 |                                                              |          |      |              |       |        |                |        |       |             |        |        |  |
| FN1029 | 17               | 27.9%    | 1.000 | 13         | 41.4%    | 1.000 | 17         | 35.5%    | 1.000 | 20           | 33.3%    | 1.000 | AAL95225.1  Zinc protease                                    |          |      |              |       |        |                |        |       |             |        |        |  |
|        | 18               | 30.6%    | 1.000 | 21         | 41.7%    | 1.000 | 15         | 29.9%    | 1.000 | 15           | 31.6%    | 1.000 |                                                              |          |      |              |       |        |                |        |       |             |        |        |  |
| FN1030 | 3                | 10.7%    | 0.999 | 0          | 0.0%     | 0.000 | 4          | 12.4%    | 1.000 | 4            | 17.4%    | 0.999 | AAL95226.1  Hypothetical membrane-spanning protein           |          |      |              |       |        |                |        |       |             |        |        |  |
|        | 1                | 3.6%     | 0.766 | 6          | 18.7%    | 1.000 | 4          | 10.7%    | 1.000 | 2            | 6.9%     | 0.992 |                                                              |          |      |              |       |        |                |        |       |             |        |        |  |
| FN1031 | 5                | 13.1%    | 1.000 | 1          | 4.2%     | 0.890 | 2          | 6.7%     | 0.992 | 1            | 3.6%     | 0.881 | AAL95227.1  Hypothetical membrane-spanning protein           |          |      |              |       |        |                |        |       |             |        |        |  |
|        | 4                | 10.3%    | 1.000 | 5          | 12.8%    | 1.000 | 4          | 12.3%    | 1.000 | 3            | 10.3%    | 0.999 |                                                              |          |      |              |       |        |                |        |       |             |        |        |  |
| FN1033 | 15               | 29.5%    | 1.000 | 11         | 17.8%    | 1.000 | 11         | 20.9%    | 1.000 | 11           | 21.4%    | 1.000 | AAL95229.1  Methyltransferase                                |          |      |              |       |        |                |        |       |             |        |        |  |
|        | 15               | 23.4%    | 1.000 | 18         | 38.4%    | 1.000 | 15         | 38.4%    | 1.000 | 10           | 22.6%    | 1.000 |                                                              |          |      |              |       |        |                |        |       |             |        |        |  |

Show detected proteins only  
 Show all proteins  
 Filter by category:

Proteins found:  
 1424

Enter (or paste) list of ORFs

| ORF    | Fn Summary Table |          |       | FnPg vs Fn |          |       | FnSg vs Fn |          |       | FnPgSg vs Fn |          |       | FnPgSg vs FnPg                                     |          |      | FnSg vs FnPg |       |        | FnPgSg vs FnSg |        |       | Fn Coverage |        |        |  |
|--------|------------------|----------|-------|------------|----------|-------|------------|----------|-------|--------------|----------|-------|----------------------------------------------------|----------|------|--------------|-------|--------|----------------|--------|-------|-------------|--------|--------|--|
|        | Fn               |          |       | FnPg       |          |       | FnSg       |          |       | FnPgSg       |          |       | Description                                        |          |      |              | Fn    |        | FnPg           |        | FnSg  |             | FnPgSg |        |  |
|        | n                | coverage | prob  | n          | coverage | prob  | n          | coverage | prob  | n            | coverage | prob  | n                                                  | coverage | prob | Description  | Rep I | Rep II | Rep I          | Rep II | Rep I | Rep II      | Rep I  | Rep II |  |
| FN1034 | 2                | 13.7%    | 0.473 | 2          | 6.3%     | 1.000 | 3          | 15.1%    | 0.991 | 3            | 17.6%    | 0.975 | AAL95230.1  Transcriptional regulator, TetR family |          |      |              |       |        |                |        |       |             |        |        |  |
|        | 1                | 8.3%     | 0.982 | 2          | 14.6%    | 0.999 | 6          | 34.6%    | 1.000 | 2            | 6.3%     | 0.997 |                                                    |          |      |              |       |        |                |        |       |             |        |        |  |
| FN1035 | 0                | 0.0%     |       | 0          | 0.0%     | 0.000 | 0          | 0.0%     | 0.000 | 0            | 0.0%     |       | AAL95231.1  Iron-sulfur flavoprotein               |          |      |              |       |        |                |        |       |             |        |        |  |
|        | 0                | 0.0%     |       | 2          | 15.7%    | 0.945 | 3          | 22.0%    | 0.999 | 0            | 0.0%     |       |                                                    |          |      |              |       |        |                |        |       |             |        |        |  |
| FN1036 | 0                | 0.0%     | 0.000 | 1          | 10.4%    | 0.520 | 3          | 10.8%    | 0.871 | 0            | 0.0%     | 0.000 | AAL95232.1  Hypothetical protein                   |          |      |              |       |        |                |        |       |             |        |        |  |
|        | 2                | 21.2%    | 0.642 | 2          | 10.4%    | 0.993 | 3          | 15.1%    | 1.000 | 1            | 10.4%    | 0.341 |                                                    |          |      |              |       |        |                |        |       |             |        |        |  |
| FN1037 | 1                | 9.5%     | 0.971 | 0          | 0.0%     | 0.000 | 5          | 41.2%    | 1.000 | 3            | 22.3%    | 0.837 | AAL95233.1  Hypothetical cytosolic protein         |          |      |              |       |        |                |        |       |             |        |        |  |
|        | 0                | 0.0%     | 0.000 | 6          | 50.0%    | 1.000 | 6          | 51.4%    | 1.000 | 0            | 0.0%     | 0.000 |                                                    |          |      |              |       |        |                |        |       |             |        |        |  |
| FN1041 | 1                | 3.3%     | 0.962 | 3          | 9.2%     | 0.999 | 4          | 13.0%    | 1.000 | 7            | 17.9%    | 1.000 | AAL95237.1  Acetyltransferase                      |          |      |              |       |        |                |        |       |             |        |        |  |
|        | 2                | 7.4%     | 0.938 | 7          | 20.7%    | 1.000 | 10         | 24.6%    | 1.000 | 3            | 9.7%     | 0.999 |                                                    |          |      |              |       |        |                |        |       |             |        |        |  |
| FN1042 | 13               | 40.9%    | 1.000 | 5          | 26.3%    | 1.000 | 5          | 20.6%    | 1.000 | 9            | 34.2%    | 1.000 | AAL95238.1  S1 RNA binding domain                  |          |      |              |       |        |                |        |       |             |        |        |  |
|        | 12               | 33.1%    | 1.000 | 8          | 32.7%    | 1.000 | 8          | 27.0%    | 1.000 | 10           | 34.2%    | 1.000 |                                                    |          |      |              |       |        |                |        |       |             |        |        |  |
| FN1045 | 5                | 20.1%    | 1.000 | 0          | 0.0%     | 0.000 | 1          | 5.9%     | 0.316 | 2            | 9.3%     | 0.804 | AAL95241.1  Hypothetical protein                   |          |      |              |       |        |                |        |       |             |        |        |  |
|        | 3                | 16.0%    | 0.990 | 0          | 0.0%     | 0.000 | 2          | 11.5%    | 0.987 | 0            | 0.0%     | 0.000 |                                                    |          |      |              |       |        |                |        |       |             |        |        |  |
| FN1048 | 1                | 4.4%     | 0.628 | 0          | 0.0%     | 0.000 | 3          | 8.7%     | 0.860 | 3            | 9.8%     | 0.841 | AAL95244.1  Hypothetical membrane-spanning protein |          |      |              |       |        |                |        |       |             |        |        |  |
|        | 1                | 1.9%     | 0.907 | 0          | 0.0%     | 0.000 | 0          | 0.0%     | 0.000 | 0            | 0.0%     | 0.000 |                                                    |          |      |              |       |        |                |        |       |             |        |        |  |
| FN1050 | 3                | 18.9%    | 0.998 | 4          | 37.0%    | 1.000 | 1          | 11.0%    | 0.336 | 0            | 0.0%     | 0.000 | AAL95246.1  Lactoylglutathione lyase               |          |      |              |       |        |                |        |       |             |        |        |  |
|        | 1                | 8.7%     | 0.610 | 3          | 28.3%    | 0.995 | 1          | 11.8%    | 0.733 | 1            | 10.2%    | 0.922 |                                                    |          |      |              |       |        |                |        |       |             |        |        |  |
| FN1053 | 1                | 7.1%     | 0.859 | 3          | 17.0%    | 1.000 | 0          | 0.0%     |       | 0            | 0.0%     |       | AAL95249.1  Hypothetical protein                   |          |      |              |       |        |                |        |       |             |        |        |  |
|        | 1                | 10.4%    | 0.972 | 0          | 0.0%     | 0.000 | 0          | 0.0%     |       | 0            | 0.0%     |       |                                                    |          |      |              |       |        |                |        |       |             |        |        |  |
| FN1055 | 11               | 34.2%    | 1.000 | 7          | 17.3%    | 1.000 | 14         | 41.1%    | 1.000 | 13           | 38.7%    | 1.000 | AAL95251.1  Cysteine synthase                      |          |      |              |       |        |                |        |       |             |        |        |  |
|        | 15               | 38.1%    | 1.000 | 15         | 44.9%    | 1.000 | 18         | 52.1%    | 1.000 | 12           | 31.5%    | 1.000 |                                                    |          |      |              |       |        |                |        |       |             |        |        |  |
| FN1057 | 5                | 27.4%    | 1.000 | 2          | 8.9%     | 0.960 | 5          | 21.2%    | 1.000 | 1            | 7.5%     | 0.933 | AAL95253.1  Diamine acetyltransferase              |          |      |              |       |        |                |        |       |             |        |        |  |
|        | 3                | 19.9%    | 1.000 | 1          | 7.5%     | 0.306 | 3          | 8.9%     | 1.000 | 1            | 7.5%     | 0.451 |                                                    |          |      |              |       |        |                |        |       |             |        |        |  |
| FN1060 | 3                | 16.1%    | 1.000 | 6          | 20.1%    | 1.000 | 12         | 56.7%    | 1.000 | 7            | 26.0%    | 1.000 | AAL95256.1  hypothetical cytosolic protein         |          |      |              |       |        |                |        |       |             |        |        |  |
|        | 3                | 15.7%    | 1.000 | 11         | 52.0%    | 1.000 | 13         | 52.0%    | 1.000 | 7            | 23.2%    | 1.000 |                                                    |          |      |              |       |        |                |        |       |             |        |        |  |
| FN1062 | 15               | 38.5%    | 1.000 | 14         | 40.0%    | 1.000 | 9          | 34.2%    | 1.000 | 18           | 44.6%    | 1.000 | AAL95258.1  Hydrolase                              |          |      |              |       |        |                |        |       |             |        |        |  |
|        | 14               | 35.8%    | 1.000 | 14         | 54.2%    | 1.000 | 13         | 43.1%    | 1.000 | 18           | 43.8%    | 1.000 |                                                    |          |      |              |       |        |                |        |       |             |        |        |  |
| FN1063 | 6                | 16.5%    | 1.000 | 4          | 15.2%    | 1.000 | 9          | 32.2%    | 1.000 | 3            | 12.2%    | 1.000 | AAL95259.1  N-acyl-L-amino acid amidohydrolase     |          |      |              |       |        |                |        |       |             |        |        |  |
|        | 4                | 14.7%    | 1.000 | 17         | 55.3%    | 1.000 | 15         | 54.6%    | 1.000 | 2            | 5.6%     | 1.000 |                                                    |          |      |              |       |        |                |        |       |             |        |        |  |
| FN1066 | 6                | 16.3%    | 1.000 | 3          | 11.1%    | 0.993 | 6          | 21.5%    | 1.000 | 5            | 13.9%    | 1.000 | AAL95262.1  Exodeoxyribonuclease VII large subunit |          |      |              |       |        |                |        |       |             |        |        |  |
|        | 4                | 12.4%    | 1.000 | 6          | 19.6%    | 1.000 | 9          | 27.2%    | 1.000 | 5            | 12.1%    | 1.000 |                                                    |          |      |              |       |        |                |        |       |             |        |        |  |

Show detected proteins only  
 Show all proteins  
 Filter by category:

Proteins found:  
 1424

Enter (or paste) list of ORFs



| ORF    | Fn Summary Table |          |       | FnPg vs Fn |          |       | FnSg vs Fn |          |       | FnPgSg vs Fn |          |       | FnPgSg vs FnPg                                                 |          |      | FnSg vs FnPg |       |        | FnPgSg vs FnSg |        |       | Fn Coverage |        |        |  |
|--------|------------------|----------|-------|------------|----------|-------|------------|----------|-------|--------------|----------|-------|----------------------------------------------------------------|----------|------|--------------|-------|--------|----------------|--------|-------|-------------|--------|--------|--|
|        | Fn               |          |       | FnPg       |          |       | FnSg       |          |       | FnPgSg       |          |       | Description                                                    |          |      |              | Fn    |        | FnPg           |        | FnSg  |             | FnPgSg |        |  |
|        | n                | coverage | prob  | n          | coverage | prob  | n          | coverage | prob  | n            | coverage | prob  | n                                                              | coverage | prob | Description  | Rep I | Rep II | Rep I          | Rep II | Rep I | Rep II      | Rep I  | Rep II |  |
| FN1067 | 10               | 52.3%    | 1.000 | 6          | 43.9%    | 1.000 | 8          | 42.2%    | 1.000 | 7            | 34.2%    | 1.000 | AAL95263.1  Tetratricopeptide repeat family protein            |          |      |              |       |        |                |        |       |             |        |        |  |
|        | 11               | 55.7%    | 1.000 | 8          | 46.4%    | 1.000 | 10         | 46.4%    | 1.000 | 9            | 49.4%    | 1.000 |                                                                |          |      |              |       |        |                |        |       |             |        |        |  |
| FN1068 | 1                | 5.2%     | 0.447 | 3          | 8.7%     | 1.000 | 6          | 24.7%    | 1.000 | 1            | 7.6%     | 0.798 | AAL95264.1  Smf protein                                        |          |      |              |       |        |                |        |       |             |        |        |  |
|        | 2                | 9.7%     | 0.978 | 6          | 21.9%    | 1.000 | 6          | 23.6%    | 1.000 | 0            | 0.0%     | 0.000 |                                                                |          |      |              |       |        |                |        |       |             |        |        |  |
| FN1069 | 30               | 38.1%    | 1.000 | 15         | 25.0%    | 1.000 | 12         | 20.6%    | 1.000 | 20           | 30.7%    | 1.000 | AAL95265.1  DNA topoisomerase I                                |          |      |              |       |        |                |        |       |             |        |        |  |
|        | 34               | 36.0%    | 1.000 | 20         | 28.8%    | 1.000 | 16         | 24.9%    | 1.000 | 17           | 25.9%    | 1.000 |                                                                |          |      |              |       |        |                |        |       |             |        |        |  |
| FN1070 | 6                | 20.0%    | 1.000 | 2          | 8.5%     | 0.999 | 3          | 12.7%    | 1.000 | 7            | 20.7%    | 1.000 | AAL95266.1  Glucose inhibited division protein A               |          |      |              |       |        |                |        |       |             |        |        |  |
|        | 7                | 18.9%    | 1.000 | 5          | 18.0%    | 1.000 | 8          | 27.0%    | 1.000 | 9            | 20.3%    | 1.000 |                                                                |          |      |              |       |        |                |        |       |             |        |        |  |
| FN1071 | 1                | 3.1%     | 0.741 | 0          | 0.0%     | 0.000 | 1          | 4.8%     | 0.350 | 4            | 14.1%    | 0.998 | AAL95267.1  Integrase/recombinase                              |          |      |              |       |        |                |        |       |             |        |        |  |
|        | 3                | 11.7%    | 0.997 | 2          | 5.9%     | 0.929 | 3          | 12.4%    | 0.998 | 0            | 0.0%     | 0.000 |                                                                |          |      |              |       |        |                |        |       |             |        |        |  |
| FN1072 | 14               | 42.3%    | 1.000 | 12         | 38.0%    | 1.000 | 7          | 32.0%    | 1.000 | 12           | 41.8%    | 1.000 | AAL95268.1  GTP-binding protein                                |          |      |              |       |        |                |        |       |             |        |        |  |
|        | 13               | 37.7%    | 1.000 | 11         | 36.9%    | 1.000 | 10         | 42.6%    | 1.000 | 14           | 43.7%    | 1.000 |                                                                |          |      |              |       |        |                |        |       |             |        |        |  |
| FN1073 | 5                | 36.3%    | 1.000 | 2          | 7.7%     | 1.000 | 4          | 23.2%    | 1.000 | 2            | 14.3%    | 1.000 | AAL95269.1  Hypothetical protein                               |          |      |              |       |        |                |        |       |             |        |        |  |
|        | 5                | 25.6%    | 1.000 | 3          | 25.0%    | 1.000 | 5          | 36.3%    | 1.000 | 3            | 12.5%    | 1.000 |                                                                |          |      |              |       |        |                |        |       |             |        |        |  |
| FN1074 | 11               | 41.1%    | 1.000 | 8          | 23.1%    | 1.000 | 11         | 41.7%    | 1.000 | 8            | 27.6%    | 1.000 | AAL95270.1  Signal recognition particle receptor FtsY          |          |      |              |       |        |                |        |       |             |        |        |  |
|        | 10               | 37.8%    | 1.000 | 11         | 38.4%    | 1.000 | 11         | 36.0%    | 1.000 | 7            | 24.9%    | 1.000 |                                                                |          |      |              |       |        |                |        |       |             |        |        |  |
| FN1075 | 1                | 4.2%     | 0.824 | 1          | 4.2%     | 0.814 | 2          | 12.1%    | 0.972 | 1            | 7.9%     | 0.936 | AAL95271.1  Hypothetical protein                               |          |      |              |       |        |                |        |       |             |        |        |  |
|        | 2                | 9.8%     | 0.977 | 1          | 4.2%     | 0.883 | 3          | 17.7%    | 0.999 | 0            | 0.0%     | 0.000 |                                                                |          |      |              |       |        |                |        |       |             |        |        |  |
| FN1077 | 3                | 43.4%    | 1.000 | 1          | 15.7%    | 0.961 | 5          | 51.8%    | 1.000 | 4            | 60.2%    | 1.000 | AAL95273.1  Hypothetical protein                               |          |      |              |       |        |                |        |       |             |        |        |  |
|        | 2                | 26.5%    | 0.951 | 7          | 73.5%    | 1.000 | 3          | 41.0%    | 1.000 | 6            | 68.7%    | 1.000 |                                                                |          |      |              |       |        |                |        |       |             |        |        |  |
| FN1078 | 17               | 55.8%    | 1.000 | 16         | 52.5%    | 1.000 | 19         | 63.0%    | 1.000 | 20           | 53.0%    | 1.000 | AAL95274.1  Hypothetical exported 24-amino acid repeat protein |          |      |              |       |        |                |        |       |             |        |        |  |
|        | 15               | 53.0%    | 1.000 | 20         | 63.0%    | 1.000 | 18         | 55.2%    | 1.000 | 24           | 63.0%    | 1.000 |                                                                |          |      |              |       |        |                |        |       |             |        |        |  |
| FN1079 | 26               | 83.3%    | 1.000 | 15         | 79.2%    | 1.000 | 22         | 93.1%    | 1.000 | 20           | 79.2%    | 1.000 | AAL95275.1  Neutrophil-activating protein A                    |          |      |              |       |        |                |        |       |             |        |        |  |
|        | 25               | 84.7%    | 1.000 | 18         | 88.2%    | 1.000 | 19         | 88.2%    | 1.000 | 21           | 86.8%    | 1.000 |                                                                |          |      |              |       |        |                |        |       |             |        |        |  |
| FN1080 | 5                | 11.2%    | 1.000 | 3          | 8.9%     | 0.942 | 5          | 12.1%    | 1.000 | 5            | 12.2%    | 1.000 | AAL95276.1  Export ABC transporter                             |          |      |              |       |        |                |        |       |             |        |        |  |
|        | 6                | 11.5%    | 1.000 | 3          | 8.0%     | 0.993 | 7          | 16.1%    | 1.000 | 4            | 10.1%    | 0.999 |                                                                |          |      |              |       |        |                |        |       |             |        |        |  |
| FN1081 | 5                | 43.5%    | 1.000 | 3          | 26.1%    | 1.000 | 1          | 17.4%    | 0.984 | 3            | 34.8%    | 1.000 | AAL95277.1  unknown                                            |          |      |              |       |        |                |        |       |             |        |        |  |
|        | 5                | 43.5%    | 1.000 | 2          | 26.1%    | 0.996 | 1          | 17.4%    | 0.932 | 4            | 43.5%    | 1.000 |                                                                |          |      |              |       |        |                |        |       |             |        |        |  |
| FN1082 | 1                | 12.1%    | 0.876 | 0          | 0.0%     | 0.000 | 0          | 0.0%     |       | 3            | 51.6%    | 0.997 | AAL95278.1  unknown                                            |          |      |              |       |        |                |        |       |             |        |        |  |
|        | 0                | 0.0%     | 0.000 | 0          | 0.0%     | 0.000 | 0          | 0.0%     |       | 1            | 12.1%    | 0.766 |                                                                |          |      |              |       |        |                |        |       |             |        |        |  |
| FN1084 | 4                | 49.4%    | 1.000 | 3          | 49.4%    | 1.000 | 3          | 49.4%    | 1.000 | 4            | 49.4%    | 1.000 | AAL95280.1  unknown                                            |          |      |              |       |        |                |        |       |             |        |        |  |
|        | 4                | 49.4%    | 1.000 | 3          | 49.4%    | 1.000 | 3          | 49.4%    | 1.000 | 4            | 61.2%    | 1.000 |                                                                |          |      |              |       |        |                |        |       |             |        |        |  |

Show detected proteins only  
 Show all proteins  
 Filter by category:

Proteins found:  
 1424

Enter (or paste) list of ORFs

| ORF    | Fn Summary Table |          |       | FnPg vs Fn |          |       | FnSg vs Fn |          |       | FnPgSg vs Fn |          |       | FnPgSg vs FnPg                                                              |          |      | FnSg vs FnPg |       |        | FnPgSg vs FnSg |        |       | Fn Coverage |        |        |  |
|--------|------------------|----------|-------|------------|----------|-------|------------|----------|-------|--------------|----------|-------|-----------------------------------------------------------------------------|----------|------|--------------|-------|--------|----------------|--------|-------|-------------|--------|--------|--|
|        | Fn               |          |       | FnPg       |          |       | FnSg       |          |       | FnPgSg       |          |       | Description                                                                 |          |      |              | Fn    |        | FnPg           |        | FnSg  |             | FnPgSg |        |  |
|        | n                | coverage | prob  | n          | coverage | prob  | n          | coverage | prob  | n            | coverage | prob  | n                                                                           | coverage | prob | Description  | Rep I | Rep II | Rep I          | Rep II | Rep I | Rep II      | Rep I  | Rep II |  |
| FN1085 | 8                | 46.2%    | 1.000 | 12         | 53.3%    | 1.000 | 16         | 65.9%    | 1.000 | 8            | 53.3%    | 1.000 | AAL95281.1  4-methyl-5-(B-hydroxyethyl)-thiazole monophosphate biosynthesis |          |      |              |       |        |                |        |       |             |        |        |  |
|        | 7                | 39.0%    | 1.000 | 17         | 71.4%    | 1.000 | 13         | 67.0%    | 1.000 | 8            | 52.7%    | 1.000 |                                                                             |          |      |              |       |        |                |        |       |             |        |        |  |
| FN1086 | 4                | 7.7%     | 1.000 | 1          | 2.9%     | 0.902 | 10         | 19.5%    | 1.000 | 8            | 16.6%    | 1.000 | AAL95282.1  Transporter                                                     |          |      |              |       |        |                |        |       |             |        |        |  |
|        | 6                | 11.6%    | 1.000 | 6          | 15.4%    | 1.000 | 10         | 19.5%    | 1.000 | 5            | 9.8%     | 1.000 |                                                                             |          |      |              |       |        |                |        |       |             |        |        |  |
| FN1088 | 10               | 21.6%    | 1.000 | 5          | 17.2%    | 1.000 | 11         | 27.6%    | 1.000 | 11           | 28.7%    | 1.000 | AAL95284.1  NADH oxidase                                                    |          |      |              |       |        |                |        |       |             |        |        |  |
|        | 10               | 27.1%    | 1.000 | 9          | 27.6%    | 1.000 | 7          | 15.2%    | 1.000 | 10           | 25.3%    | 1.000 |                                                                             |          |      |              |       |        |                |        |       |             |        |        |  |
| FN1089 | 8                | 31.4%    | 1.000 | 14         | 38.6%    | 1.000 | 18         | 54.8%    | 1.000 | 8            | 31.0%    | 1.000 | AAL95285.1  ATP-binding protein (contains P-loop)                           |          |      |              |       |        |                |        |       |             |        |        |  |
|        | 9                | 35.5%    | 1.000 | 22         | 71.7%    | 1.000 | 21         | 58.6%    | 1.000 | 4            | 21.0%    | 1.000 |                                                                             |          |      |              |       |        |                |        |       |             |        |        |  |
| FN1091 | 6                | 17.7%    | 1.000 | 4          | 8.9%     | 1.000 | 4          | 8.9%     | 1.000 | 3            | 12.1%    | 1.000 | AAL95287.1  Sigma factor sigB regulation protein rsbU                       |          |      |              |       |        |                |        |       |             |        |        |  |
|        | 8                | 22.8%    | 1.000 | 4          | 9.6%     | 1.000 | 7          | 17.9%    | 1.000 | 4            | 10.7%    | 1.000 |                                                                             |          |      |              |       |        |                |        |       |             |        |        |  |
| FN1092 | 6                | 18.4%    | 1.000 | 4          | 17.4%    | 1.000 | 10         | 19.1%    | 1.000 | 8            | 19.7%    | 1.000 | AAL95288.1  Hypothetical protein                                            |          |      |              |       |        |                |        |       |             |        |        |  |
|        | 6                | 23.4%    | 1.000 | 13         | 26.3%    | 1.000 | 10         | 27.3%    | 1.000 | 8            | 24.7%    | 1.000 |                                                                             |          |      |              |       |        |                |        |       |             |        |        |  |
| FN1093 | 12               | 72.5%    | 1.000 | 7          | 43.0%    | 1.000 | 5          | 43.7%    | 1.000 | 12           | 72.5%    | 1.000 | AAL95289.1  Hypothetical protein                                            |          |      |              |       |        |                |        |       |             |        |        |  |
|        | 11               | 59.9%    | 1.000 | 9          | 53.5%    | 1.000 | 9          | 52.1%    | 1.000 | 10           | 59.9%    | 1.000 |                                                                             |          |      |              |       |        |                |        |       |             |        |        |  |
| FN1094 | 1                | 7.8%     | 0.979 | 1          | 7.8%     | 0.983 | 5          | 20.3%    | 1.000 | 2            | 13.9%    | 0.995 | AAL95290.1  Dolichol-phosphate mannosyltransferase                          |          |      |              |       |        |                |        |       |             |        |        |  |
|        | 1                | 7.8%     | 0.982 | 7          | 23.9%    | 1.000 | 11         | 26.7%    | 1.000 | 2            | 10.3%    | 0.994 |                                                                             |          |      |              |       |        |                |        |       |             |        |        |  |
| FN1095 | 0                | 0.0%     | 0.000 | 3          | 18.3%    | 1.000 | 1          | 10.8%    | 0.662 | 2            | 20.8%    | 0.992 | AAL95291.1  unknown                                                         |          |      |              |       |        |                |        |       |             |        |        |  |
|        | 1                | 8.3%     | 0.859 | 0          | 0.0%     | 0.000 | 1          | 10.8%    | 0.908 | 2            | 20.8%    | 0.801 |                                                                             |          |      |              |       |        |                |        |       |             |        |        |  |
| FN1096 | 13               | 30.2%    | 1.000 | 12         | 25.8%    | 1.000 | 6          | 15.9%    | 1.000 | 10           | 25.6%    | 1.000 | AAL95292.1  Hypothetical protein                                            |          |      |              |       |        |                |        |       |             |        |        |  |
|        | 11               | 28.3%    | 1.000 | 8          | 22.2%    | 1.000 | 13         | 29.2%    | 1.000 | 8            | 22.2%    | 1.000 |                                                                             |          |      |              |       |        |                |        |       |             |        |        |  |
| FN1097 | 12               | 17.1%    | 1.000 | 10         | 17.0%    | 1.000 | 0          | 0.0%     | 0.000 | 8            | 15.3%    | 1.000 | AAL95293.1  Hypothetical protein                                            |          |      |              |       |        |                |        |       |             |        |        |  |
|        | 10               | 16.1%    | 1.000 | 2          | 5.2%     | 0.999 | 5          | 7.4%     | 1.000 | 7            | 12.6%    | 1.000 |                                                                             |          |      |              |       |        |                |        |       |             |        |        |  |
| FN1101 | 3                | 7.7%     | 0.998 | 2          | 6.0%     | 0.952 | 1          | 1.7%     | 0.544 | 3            | 10.2%    | 1.000 | AAL95297.1  ATPase                                                          |          |      |              |       |        |                |        |       |             |        |        |  |
|        | 2                | 6.0%     | 0.997 | 2          | 6.0%     | 0.992 | 5          | 17.0%    | 1.000 | 2            | 8.7%     | 0.808 |                                                                             |          |      |              |       |        |                |        |       |             |        |        |  |
| FN1102 | 4                | 17.9%    | 1.000 | 0          | 0.0%     | 0.000 | 2          | 10.1%    | 0.982 | 0            | 0.0%     |       | AAL95298.1  tRNA 2'phosphotransferase                                       |          |      |              |       |        |                |        |       |             |        |        |  |
|        | 3                | 17.9%    | 1.000 | 1          | 5.0%     | 0.873 | 3          | 18.4%    | 1.000 | 0            | 0.0%     |       |                                                                             |          |      |              |       |        |                |        |       |             |        |        |  |
| FN1103 | 27               | 39.4%    | 1.000 | 7          | 12.6%    | 1.000 | 18         | 27.0%    | 1.000 | 8            | 12.4%    | 1.000 | AAL95299.1  Excinuclease ABC subunit A                                      |          |      |              |       |        |                |        |       |             |        |        |  |
|        | 22               | 34.7%    | 1.000 | 17         | 25.7%    | 1.000 | 22         | 32.3%    | 1.000 | 11           | 17.2%    | 1.000 |                                                                             |          |      |              |       |        |                |        |       |             |        |        |  |
| FN1104 | 2                | 5.2%     | 0.999 | 0          | 0.0%     | 0.000 | 2          | 5.2%     | 0.997 | 4            | 24.7%    | 1.000 | AAL95300.1  Holliday junction DNA helicase ruvA                             |          |      |              |       |        |                |        |       |             |        |        |  |
|        | 1                | 5.2%     | 0.975 | 1          | 5.2%     | 0.983 | 2          | 5.2%     | 0.988 | 1            | 3.6%     | 0.547 |                                                                             |          |      |              |       |        |                |        |       |             |        |        |  |
| FN1105 | 14               | 70.9%    | 1.000 | 10         | 55.2%    | 1.000 | 11         | 53.3%    | 1.000 | 17           | 75.8%    | 1.000 | AAL95301.1  Hypothetical protein                                            |          |      |              |       |        |                |        |       |             |        |        |  |
|        | 14               | 64.8%    | 1.000 | 14         | 70.9%    | 1.000 | 13         | 59.4%    | 1.000 | 13           | 75.2%    | 1.000 |                                                                             |          |      |              |       |        |                |        |       |             |        |        |  |

Show detected proteins only  
 Show all proteins  
 Filter by category:

Proteins found:  
 1424

Enter (or paste) list of ORFs

| ORF    | Fn Summary Table |          |       | FnPg vs Fn |          |       | FnSg vs Fn |          |       | FnPgSg vs Fn |          |       | FnPgSg vs FnPg                                          |          |      | FnSg vs FnPg |       |        | FnPgSg vs FnSg |        |       | Fn Coverage |        |        |  |
|--------|------------------|----------|-------|------------|----------|-------|------------|----------|-------|--------------|----------|-------|---------------------------------------------------------|----------|------|--------------|-------|--------|----------------|--------|-------|-------------|--------|--------|--|
|        | Fn               |          |       | FnPg       |          |       | FnSg       |          |       | FnPgSg       |          |       | Description                                             |          |      |              | Fn    |        | FnPg           |        | FnSg  |             | FnPgSg |        |  |
|        | n                | coverage | prob  | n          | coverage | prob  | n          | coverage | prob  | n            | coverage | prob  | n                                                       | coverage | prob | Description  | Rep I | Rep II | Rep I          | Rep II | Rep I | Rep II      | Rep I  | Rep II |  |
| FN1106 | 12               | 28.4%    | 1.000 | 9          | 23.0%    | 1.000 | 15         | 37.7%    | 1.000 | 10           | 26.7%    | 1.000 | AAL95302.1  L-serine dehydratase                        |          |      |              |       |        |                |        |       |             |        |        |  |
|        | 10               | 23.0%    | 1.000 | 13         | 37.0%    | 1.000 | 12         | 32.6%    | 1.000 | 9            | 25.2%    | 1.000 |                                                         |          |      |              |       |        |                |        |       |             |        |        |  |
| FN1111 | 2                | 4.8%     | 0.997 | 2          | 7.6%     | 0.609 | 6          | 17.3%    | 1.000 | 6            | 17.7%    | 1.000 | AAL95307.1  Dipeptide-binding protein                   |          |      |              |       |        |                |        |       |             |        |        |  |
|        | 4                | 7.8%     | 1.000 | 2          | 4.8%     | 1.000 | 10         | 27.9%    | 1.000 | 7            | 19.9%    | 1.000 |                                                         |          |      |              |       |        |                |        |       |             |        |        |  |
| FN1117 | 7                | 44.2%    | 1.000 | 4          | 44.2%    | 1.000 | 4          | 44.2%    | 1.000 | 6            | 40.4%    | 1.000 | AAL95313.1  LSU ribosomal protein L21P                  |          |      |              |       |        |                |        |       |             |        |        |  |
|        | 5                | 51.0%    | 1.000 | 5          | 32.7%    | 1.000 | 4          | 26.9%    | 0.996 | 6            | 40.4%    | 1.000 |                                                         |          |      |              |       |        |                |        |       |             |        |        |  |
| FN1119 | 6                | 35.1%    | 1.000 | 3          | 25.5%    | 1.000 | 4          | 25.5%    | 1.000 | 8            | 43.6%    | 1.000 | AAL95315.1  LSU ribosomal protein L27P                  |          |      |              |       |        |                |        |       |             |        |        |  |
|        | 4                | 22.3%    | 1.000 | 5          | 35.1%    | 1.000 | 4          | 35.1%    | 1.000 | 8            | 43.6%    | 1.000 |                                                         |          |      |              |       |        |                |        |       |             |        |        |  |
| FN1120 | 20               | 38.9%    | 1.000 | 28         | 55.6%    | 1.000 | 33         | 59.0%    | 1.000 | 25           | 52.2%    | 1.000 | AAL95316.1  Phosphoenolpyruvate carboxykinase (ATP)     |          |      |              |       |        |                |        |       |             |        |        |  |
|        | 22               | 40.8%    | 1.000 | 40         | 63.0%    | 1.000 | 33         | 61.5%    | 1.000 | 22           | 51.8%    | 1.000 |                                                         |          |      |              |       |        |                |        |       |             |        |        |  |
| FN1121 | 26               | 41.9%    | 1.000 | 13         | 23.9%    | 1.000 | 17         | 31.6%    | 1.000 | 21           | 37.2%    | 1.000 | AAL95317.1  hypothetical cytosolic protein              |          |      |              |       |        |                |        |       |             |        |        |  |
|        | 21               | 38.7%    | 1.000 | 27         | 50.0%    | 1.000 | 27         | 43.7%    | 1.000 | 24           | 43.5%    | 1.000 |                                                         |          |      |              |       |        |                |        |       |             |        |        |  |
| FN1122 | 29               | 31.3%    | 1.000 | 9          | 7.1%     | 1.000 | 18         | 20.8%    | 1.000 | 27           | 28.6%    | 1.000 | AAL95318.1  Long-chain-fatty-acid--CoA ligase           |          |      |              |       |        |                |        |       |             |        |        |  |
|        | 26               | 28.3%    | 1.000 | 16         | 18.2%    | 1.000 | 20         | 21.6%    | 1.000 | 24           | 29.1%    | 1.000 |                                                         |          |      |              |       |        |                |        |       |             |        |        |  |
| FN1123 | 10               | 48.4%    | 1.000 | 3          | 22.9%    | 1.000 | 5          | 32.5%    | 1.000 | 7            | 47.8%    | 1.000 | AAL95319.1  Thioredoxin-like protein                    |          |      |              |       |        |                |        |       |             |        |        |  |
|        | 7                | 48.4%    | 1.000 | 3          | 25.5%    | 1.000 | 3          | 24.2%    | 1.000 | 6            | 45.9%    | 1.000 |                                                         |          |      |              |       |        |                |        |       |             |        |        |  |
| FN1124 | 24               | 67.0%    | 1.000 | 15         | 49.2%    | 1.000 | 24         | 67.3%    | 1.000 | 29           | 72.4%    | 1.000 | AAL95320.1  Outer membrane porin F                      |          |      |              |       |        |                |        |       |             |        |        |  |
|        | 23               | 67.0%    | 1.000 | 23         | 75.2%    | 1.000 | 22         | 78.1%    | 1.000 | 26           | 72.4%    | 1.000 |                                                         |          |      |              |       |        |                |        |       |             |        |        |  |
| FN1125 | 6                | 44.3%    | 1.000 | 7          | 37.2%    | 1.000 | 10         | 51.9%    | 1.000 | 9            | 44.3%    | 1.000 | AAL95321.1  LemA protein                                |          |      |              |       |        |                |        |       |             |        |        |  |
|        | 7                | 44.3%    | 1.000 | 11         | 50.8%    | 1.000 | 9          | 50.8%    | 1.000 | 10           | 50.8%    | 1.000 |                                                         |          |      |              |       |        |                |        |       |             |        |        |  |
| FN1127 | 11               | 23.9%    | 1.000 | 11         | 27.2%    | 1.000 | 16         | 36.1%    | 1.000 | 13           | 27.2%    | 1.000 | AAL95323.1  Hypothetical membrane-spanning protein      |          |      |              |       |        |                |        |       |             |        |        |  |
|        | 14               | 26.7%    | 1.000 | 14         | 29.0%    | 1.000 | 17         | 31.4%    | 1.000 | 10           | 20.6%    | 1.000 |                                                         |          |      |              |       |        |                |        |       |             |        |        |  |
| FN1128 | 29               | 51.8%    | 1.000 | 34         | 55.3%    | 1.000 | 24         | 45.5%    | 1.000 | 26           | 44.5%    | 1.000 | AAL95324.1  Acylamino-acid-releasing enzyme             |          |      |              |       |        |                |        |       |             |        |        |  |
|        | 32               | 53.8%    | 1.000 | 37         | 58.3%    | 1.000 | 29         | 50.6%    | 1.000 | 24           | 42.0%    | 1.000 |                                                         |          |      |              |       |        |                |        |       |             |        |        |  |
| FN1129 | 10               | 9.6%     | 1.000 | 2          | 2.4%     | 0.998 | 4          | 5.1%     | 1.000 | 9            | 10.8%    | 1.000 | AAL95325.1  Chromosome partition protein smc            |          |      |              |       |        |                |        |       |             |        |        |  |
|        | 13               | 14.2%    | 1.000 | 5          | 5.3%     | 1.000 | 8          | 9.4%     | 1.000 | 4            | 3.8%     | 0.969 |                                                         |          |      |              |       |        |                |        |       |             |        |        |  |
| FN1130 | 7                | 24.9%    | 1.000 | 2          | 11.4%    | 0.997 | 2          | 9.2%     | 0.999 | 5            | 20.0%    | 1.000 | AAL95326.1  Tetraacyldisaccharide 4'-kinase             |          |      |              |       |        |                |        |       |             |        |        |  |
|        | 7                | 24.9%    | 1.000 | 3          | 11.1%    | 0.956 | 5          | 22.2%    | 1.000 | 2            | 7.7%     | 0.974 |                                                         |          |      |              |       |        |                |        |       |             |        |        |  |
| FN1131 | 1                | 4.3%     | 0.977 | 1          | 6.2%     | 0.943 | 2          | 10.5%    | 1.000 | 3            | 10.5%    | 0.996 | AAL95327.1  Hypothetical protein                        |          |      |              |       |        |                |        |       |             |        |        |  |
|        | 5                | 20.6%    | 1.000 | 5          | 20.6%    | 1.000 | 4          | 17.9%    | 1.000 | 2            | 7.0%     | 0.910 |                                                         |          |      |              |       |        |                |        |       |             |        |        |  |
| FN1133 | 11               | 34.5%    | 1.000 | 8          | 32.6%    | 1.000 | 9          | 28.2%    | 1.000 | 14           | 38.9%    | 1.000 | AAL95329.1  N-acetylglucosamine-6-phosphate deacetylase |          |      |              |       |        |                |        |       |             |        |        |  |
|        | 8                | 22.0%    | 1.000 | 19         | 53.4%    | 1.000 | 8          | 26.9%    | 1.000 | 13           | 37.6%    | 1.000 |                                                         |          |      |              |       |        |                |        |       |             |        |        |  |

Show detected proteins only  
 Show all proteins  
 Filter by category:

Proteins found:  
 1424

Enter (or paste) list of ORFs

| ORF    | Fn Summary Table |          |       | FnPg vs Fn |          |       | FnSg vs Fn |          |       | FnPgSg vs Fn |          |       | FnPgSg vs FnPg                                                  |          |      | FnSg vs FnPg |       |        | FnPgSg vs FnSg |        |       | Fn Coverage |        |        |  |
|--------|------------------|----------|-------|------------|----------|-------|------------|----------|-------|--------------|----------|-------|-----------------------------------------------------------------|----------|------|--------------|-------|--------|----------------|--------|-------|-------------|--------|--------|--|
|        | Fn               |          |       | FnPg       |          |       | FnSg       |          |       | FnPgSg       |          |       | Description                                                     |          |      |              | Fn    |        | FnPg           |        | FnSg  |             | FnPgSg |        |  |
|        | n                | coverage | prob  | n          | coverage | prob  | n          | coverage | prob  | n            | coverage | prob  | n                                                               | coverage | prob | Description  | Rep I | Rep II | Rep I          | Rep II | Rep I | Rep II      | Rep I  | Rep II |  |
| FN1134 | 10               | 47.7%    | 1.000 | 6          | 30.3%    | 1.000 | 2          | 10.3%    | 1.000 | 9            | 47.7%    | 1.000 | AAL95330.1  Hypothetical cytosolic protein                      |          |      |              |       |        |                |        |       |             |        |        |  |
|        | 9                | 41.3%    | 1.000 | 6          | 34.8%    | 1.000 | 3          | 16.8%    | 1.000 | 6            | 41.3%    | 1.000 |                                                                 |          |      |              |       |        |                |        |       |             |        |        |  |
| FN1135 | 14               | 41.5%    | 1.000 | 8          | 25.9%    | 1.000 | 11         | 48.9%    | 1.000 | 14           | 41.1%    | 1.000 | AAL95331.1  Phosphonates-binding protein                        |          |      |              |       |        |                |        |       |             |        |        |  |
|        | 14               | 38.3%    | 1.000 | 13         | 45.7%    | 1.000 | 13         | 36.2%    | 1.000 | 15           | 41.5%    | 1.000 |                                                                 |          |      |              |       |        |                |        |       |             |        |        |  |
| FN1136 | 3                | 17.8%    | 1.000 | 0          | 0.0%     | 0.000 | 6          | 27.1%    | 1.000 | 4            | 24.3%    | 1.000 | AAL95332.1  Phosphonates transport ATP-binding protein phnC     |          |      |              |       |        |                |        |       |             |        |        |  |
|        | 4                | 23.5%    | 1.000 | 8          | 31.6%    | 1.000 | 6          | 22.7%    | 1.000 | 5            | 29.1%    | 1.000 |                                                                 |          |      |              |       |        |                |        |       |             |        |        |  |
| FN1137 | 0                | 0.0%     |       | 0          | 0.0%     | 0.000 | 1          | 4.6%     | 0.400 | 1            | 3.6%     | 0.462 | AAL95333.1  Phosphonates transport system permease protein phnE |          |      |              |       |        |                |        |       |             |        |        |  |
|        | 0                | 0.0%     |       | 1          | 4.6%     | 0.730 | 2          | 8.2%     | 0.876 | 3            | 4.4%     | 0.996 |                                                                 |          |      |              |       |        |                |        |       |             |        |        |  |
| FN1138 | 15               | 67.1%    | 1.000 | 10         | 63.6%    | 1.000 | 16         | 79.7%    | 1.000 | 16           | 67.1%    | 1.000 | AAL95334.1  Hypothetical cytosolic protein                      |          |      |              |       |        |                |        |       |             |        |        |  |
|        | 14               | 67.1%    | 1.000 | 18         | 79.7%    | 1.000 | 14         | 72.0%    | 1.000 | 16           | 74.1%    | 1.000 |                                                                 |          |      |              |       |        |                |        |       |             |        |        |  |
| FN1139 | 18               | 22.5%    | 1.000 | 7          | 10.6%    | 1.000 | 30         | 38.9%    | 1.000 | 9            | 12.8%    | 1.000 | AAL95335.1  Activator of (R)-2-hydroxyglutaryl-CoA dehydratase  |          |      |              |       |        |                |        |       |             |        |        |  |
|        | 13               | 18.8%    | 1.000 | 32         | 39.5%    | 1.000 | 41         | 47.5%    | 1.000 | 5            | 6.9%     | 1.000 |                                                                 |          |      |              |       |        |                |        |       |             |        |        |  |
| FN1140 | 4                | 13.0%    | 1.000 | 2          | 5.2%     | 0.719 | 5          | 17.4%    | 1.000 | 1            | 2.7%     | 0.415 | AAL95336.1  hypothetical protein                                |          |      |              |       |        |                |        |       |             |        |        |  |
|        | 5                | 17.0%    | 1.000 | 9          | 34.2%    | 1.000 | 12         | 38.8%    | 1.000 | 2            | 6.4%     | 0.966 |                                                                 |          |      |              |       |        |                |        |       |             |        |        |  |
| FN1142 | 6                | 18.1%    | 1.000 | 1          | 3.3%     | 0.979 | 4          | 17.1%    | 1.000 | 3            | 11.5%    | 0.988 | AAL95338.1  Oxygen-independent coproporphyrinogen III oxidase   |          |      |              |       |        |                |        |       |             |        |        |  |
|        | 6                | 15.5%    | 1.000 | 4          | 17.8%    | 0.930 | 5          | 14.8%    | 1.000 | 0            | 0.0%     | 0.000 |                                                                 |          |      |              |       |        |                |        |       |             |        |        |  |
| FN1143 | 16               | 50.7%    | 1.000 | 9          | 46.4%    | 1.000 | 19         | 71.9%    | 1.000 | 17           | 51.5%    | 1.000 | AAL95339.1  Glucosamine-6-phosphate isomerase                   |          |      |              |       |        |                |        |       |             |        |        |  |
|        | 15               | 50.7%    | 1.000 | 24         | 83.2%    | 1.000 | 18         | 77.7%    | 1.000 | 13           | 49.6%    | 1.000 |                                                                 |          |      |              |       |        |                |        |       |             |        |        |  |
| FN1144 | 19               | 52.2%    | 1.000 | 6          | 26.5%    | 1.000 | 16         | 65.9%    | 1.000 | 22           | 55.4%    | 1.000 | AAL95340.1  Hypothetical Exported Protein                       |          |      |              |       |        |                |        |       |             |        |        |  |
|        | 21               | 58.2%    | 1.000 | 17         | 65.9%    | 1.000 | 16         | 58.6%    | 1.000 | 23           | 58.2%    | 1.000 |                                                                 |          |      |              |       |        |                |        |       |             |        |        |  |
| FN1145 | 6                | 20.6%    | 1.000 | 5          | 14.3%    | 1.000 | 6          | 18.6%    | 1.000 | 9            | 14.0%    | 1.000 | AAL95341.1  Oligoendopeptidase F                                |          |      |              |       |        |                |        |       |             |        |        |  |
|        | 7                | 20.2%    | 1.000 | 13         | 32.4%    | 1.000 | 19         | 32.7%    | 1.000 | 12           | 22.7%    | 1.000 |                                                                 |          |      |              |       |        |                |        |       |             |        |        |  |
| FN1146 | 5                | 39.8%    | 1.000 | 3          | 32.0%    | 1.000 | 0          | 0.0%     | 0.000 | 5            | 46.1%    | 1.000 | AAL95342.1  Hypothetical exported 24-amino acid repeat protein  |          |      |              |       |        |                |        |       |             |        |        |  |
|        | 5                | 39.8%    | 1.000 | 2          | 18.0%    | 0.994 | 1          | 7.8%     | 0.912 | 4            | 38.3%    | 1.000 |                                                                 |          |      |              |       |        |                |        |       |             |        |        |  |
| FN1147 | 9                | 34.1%    | 1.000 | 1          | 2.9%     | 0.942 | 0          | 0.0%     |       | 12           | 36.5%    | 1.000 | AAL95343.1  Hypothetical protein                                |          |      |              |       |        |                |        |       |             |        |        |  |
|        | 11               | 37.7%    | 1.000 | 1          | 3.2%     | 0.969 | 0          | 0.0%     |       | 11           | 36.0%    | 1.000 |                                                                 |          |      |              |       |        |                |        |       |             |        |        |  |
| FN1148 | 6                | 12.8%    | 1.000 | 3          | 9.5%     | 1.000 | 5          | 11.0%    | 1.000 | 10           | 21.3%    | 1.000 | AAL95344.1  Serine/threonine sodium symporter                   |          |      |              |       |        |                |        |       |             |        |        |  |
|        | 6                | 12.8%    | 1.000 | 8          | 17.4%    | 1.000 | 5          | 11.0%    | 1.000 | 4            | 11.0%    | 1.000 |                                                                 |          |      |              |       |        |                |        |       |             |        |        |  |
| FN1149 | 9                | 12.1%    | 1.000 | 5          | 8.0%     | 1.000 | 7          | 10.0%    | 1.000 | 4            | 6.2%     | 1.000 | AAL95345.1  ATP-dependent nuclease subunit A                    |          |      |              |       |        |                |        |       |             |        |        |  |
|        | 7                | 8.2%     | 1.000 | 5          | 5.4%     | 1.000 | 11         | 14.1%    | 1.000 | 4            | 6.4%     | 1.000 |                                                                 |          |      |              |       |        |                |        |       |             |        |        |  |
| FN1150 | 0                | 0.0%     | 0.000 | 2          | 2.0%     | 0.980 | 1          | 1.3%     | 0.957 | 1            | 1.3%     | 0.979 | AAL95346.1  unknown                                             |          |      |              |       |        |                |        |       |             |        |        |  |
|        | 6                | 7.9%     | 1.000 | 4          | 5.3%     | 1.000 | 5          | 5.1%     | 1.000 | 4            | 5.9%     | 1.000 |                                                                 |          |      |              |       |        |                |        |       |             |        |        |  |

Show detected proteins only  
 Show all proteins  
 Filter by category:

Proteins found:  
 1424

Enter (or paste) list of ORFs



| ORF    | Fn Summary Table |          |       | FnPg vs Fn |          |       | FnSg vs Fn |          |       | FnPgSg vs Fn |          |       | FnPgSg vs FnPg                                   |          |      | FnSg vs FnPg |       |        | FnPgSg vs FnSg |        |       | Fn Coverage |        |        |  |
|--------|------------------|----------|-------|------------|----------|-------|------------|----------|-------|--------------|----------|-------|--------------------------------------------------|----------|------|--------------|-------|--------|----------------|--------|-------|-------------|--------|--------|--|
|        | Fn               |          |       | FnPg       |          |       | FnSg       |          |       | FnPgSg       |          |       | Description                                      |          |      |              | Fn    |        | FnPg           |        | FnSg  |             | FnPgSg |        |  |
|        | n                | coverage | prob  | n          | coverage | prob  | n          | coverage | prob  | n            | coverage | prob  | n                                                | coverage | prob | Description  | Rep I | Rep II | Rep I          | Rep II | Rep I | Rep II      | Rep I  | Rep II |  |
| FN1170 | 125              | 68.4%    | 1.000 | 107        | 65.1%    | 1.000 | 113        | 73.7%    | 1.000 | 122          | 70.3%    | 1.000 | AAL95366.1  Pyruvate-flavodoxin oxidoreductase   |          |      |              |       |        |                |        |       |             |        |        |  |
|        | 119              | 67.5%    | 1.000 | 117        | 71.4%    | 1.000 | 118        | 78.0%    | 1.000 | 123          | 67.6%    | 1.000 |                                                  |          |      |              |       |        |                |        |       |             |        |        |  |
| FN1171 | 37               | 76.1%    | 1.000 | 40         | 80.9%    | 1.000 | 37         | 86.7%    | 1.000 | 39           | 72.6%    | 1.000 | AAL95367.1  Acetate kinase                       |          |      |              |       |        |                |        |       |             |        |        |  |
|        | 41               | 76.1%    | 1.000 | 43         | 80.4%    | 1.000 | 42         | 89.2%    | 1.000 | 37           | 73.4%    | 1.000 |                                                  |          |      |              |       |        |                |        |       |             |        |        |  |
| FN1172 | 29               | 67.7%    | 1.000 | 25         | 58.8%    | 1.000 | 27         | 71.2%    | 1.000 | 30           | 76.3%    | 1.000 | AAL95368.1  Phosphate acetyltransferase          |          |      |              |       |        |                |        |       |             |        |        |  |
|        | 29               | 67.7%    | 1.000 | 24         | 62.9%    | 1.000 | 23         | 57.3%    | 1.000 | 27           | 76.3%    | 1.000 |                                                  |          |      |              |       |        |                |        |       |             |        |        |  |
| FN1176 | 0                | 0.0%     |       | 4          | 39.6%    | 1.000 | 0          | 0.0%     |       | 0            | 0.0%     |       | AAL95372.1  Hypothetical cytosolic protein       |          |      |              |       |        |                |        |       |             |        |        |  |
|        | 0                | 0.0%     |       | 0          | 0.0%     | 0.000 | 0          | 0.0%     |       | 0            | 0.0%     |       |                                                  |          |      |              |       |        |                |        |       |             |        |        |  |
| FN1179 | 1                | 2.1%     | 0.615 | 7          | 12.8%    | 1.000 | 1          | 2.2%     | 0.451 | 1            | 2.1%     | 0.588 | AAL95375.1  ATP-dependent RNA helicase           |          |      |              |       |        |                |        |       |             |        |        |  |
|        | 3                | 7.6%     | 1.000 | 0          | 0.0%     | 0.000 | 4          | 7.5%     | 0.927 | 0            | 0.0%     | 0.000 |                                                  |          |      |              |       |        |                |        |       |             |        |        |  |
| FN1180 | 4                | 16.9%    | 1.000 | 3          | 18.1%    | 1.000 | 2          | 15.6%    | 0.986 | 2            | 9.9%     | 0.999 | AAL95376.1  Hypothetical protein                 |          |      |              |       |        |                |        |       |             |        |        |  |
|        | 5                | 19.3%    | 1.000 | 0          | 0.0%     | 0.000 | 5          | 23.9%    | 1.000 | 1            | 6.6%     | 0.986 |                                                  |          |      |              |       |        |                |        |       |             |        |        |  |
| FN1181 | 16               | 48.3%    | 1.000 | 18         | 50.3%    | 1.000 | 14         | 40.0%    | 1.000 | 18           | 66.0%    | 1.000 | AAL95377.1  unknown                              |          |      |              |       |        |                |        |       |             |        |        |  |
|        | 12               | 39.0%    | 1.000 | 12         | 44.7%    | 1.000 | 15         | 48.0%    | 1.000 | 16           | 54.3%    | 1.000 |                                                  |          |      |              |       |        |                |        |       |             |        |        |  |
| FN1182 | 4                | 7.2%     | 1.000 | 3          | 6.6%     | 1.000 | 1          | 1.7%     | 0.971 | 1            | 2.1%     | 0.887 | AAL95378.1  Hypothetical protein                 |          |      |              |       |        |                |        |       |             |        |        |  |
|        | 5                | 7.4%     | 1.000 | 2          | 3.7%     | 0.940 | 5          | 8.3%     | 1.000 | 1            | 2.7%     | 0.327 |                                                  |          |      |              |       |        |                |        |       |             |        |        |  |
| FN1183 | 3                | 12.4%    | 0.996 | 6          | 22.4%    | 1.000 | 6          | 28.0%    | 1.000 | 4            | 14.8%    | 1.000 | AAL95379.1  Hypothetical cytosolic protein       |          |      |              |       |        |                |        |       |             |        |        |  |
|        | 3                | 13.2%    | 0.990 | 4          | 13.6%    | 1.000 | 7          | 30.0%    | 1.000 | 3            | 10.8%    | 0.998 |                                                  |          |      |              |       |        |                |        |       |             |        |        |  |
| FN1184 | 0                | 0.0%     |       | 3          | 18.1%    | 1.000 | 1          | 8.4%     | 0.985 | 1            | 5.4%     | 0.350 | AAL95380.1  Hypothetical protein                 |          |      |              |       |        |                |        |       |             |        |        |  |
|        | 0                | 0.0%     |       | 0          | 0.0%     | 0.000 | 2          | 13.4%    | 0.999 | 0            | 0.0%     | 0.000 |                                                  |          |      |              |       |        |                |        |       |             |        |        |  |
| FN1185 | 8                | 24.6%    | 1.000 | 4          | 11.5%    | 1.000 | 6          | 24.6%    | 1.000 | 9            | 28.2%    | 1.000 | AAL95381.1  SIR2 family protein                  |          |      |              |       |        |                |        |       |             |        |        |  |
|        | 5                | 20.2%    | 1.000 | 11         | 33.3%    | 1.000 | 7          | 24.6%    | 1.000 | 8            | 31.0%    | 1.000 |                                                  |          |      |              |       |        |                |        |       |             |        |        |  |
| FN1186 | 4                | 23.1%    | 1.000 | 7          | 33.4%    | 1.000 | 24         | 72.4%    | 1.000 | 6            | 33.4%    | 1.000 | AAL95382.1  Amidohydrolase                       |          |      |              |       |        |                |        |       |             |        |        |  |
|        | 6                | 24.2%    | 1.000 | 26         | 80.5%    | 1.000 | 29         | 82.7%    | 1.000 | 3            | 13.4%    | 1.000 |                                                  |          |      |              |       |        |                |        |       |             |        |        |  |
| FN1187 | 2                | 14.2%    | 0.999 | 3          | 14.2%    | 1.000 | 16         | 59.4%    | 1.000 | 10           | 44.8%    | 1.000 | AAL95383.1  Amino acid-binding protein           |          |      |              |       |        |                |        |       |             |        |        |  |
|        | 1                | 7.9%     | 0.982 | 18         | 69.5%    | 1.000 | 16         | 59.4%    | 1.000 | 10           | 51.5%    | 1.000 |                                                  |          |      |              |       |        |                |        |       |             |        |        |  |
| FN1188 | 9                | 40.6%    | 1.000 | 4          | 19.4%    | 1.000 | 14         | 54.5%    | 1.000 | 8            | 58.8%    | 1.000 | AAL95384.1  Hypothetical protein                 |          |      |              |       |        |                |        |       |             |        |        |  |
|        | 8                | 40.6%    | 1.000 | 14         | 54.5%    | 1.000 | 14         | 53.3%    | 1.000 | 8            | 32.7%    | 1.000 |                                                  |          |      |              |       |        |                |        |       |             |        |        |  |
| FN1189 | 7                | 27.6%    | 1.000 | 7          | 25.9%    | 1.000 | 7          | 32.8%    | 1.000 | 9            | 56.9%    | 1.000 | AAL95385.1  Hypothetical protein                 |          |      |              |       |        |                |        |       |             |        |        |  |
|        | 7                | 30.2%    | 1.000 | 13         | 68.1%    | 1.000 | 9          | 41.4%    | 1.000 | 9            | 46.6%    | 1.000 |                                                  |          |      |              |       |        |                |        |       |             |        |        |  |
| FN1190 | 20               | 29.5%    | 1.000 | 18         | 28.2%    | 1.000 | 29         | 45.2%    | 1.000 | 22           | 31.6%    | 1.000 | AAL95386.1  Probable cadmium-transporting ATPase |          |      |              |       |        |                |        |       |             |        |        |  |
|        | 25               | 35.8%    | 1.000 | 25         | 34.7%    | 1.000 | 31         | 45.0%    | 1.000 | 19           | 30.1%    | 1.000 |                                                  |          |      |              |       |        |                |        |       |             |        |        |  |

Show detected proteins only  
 Show all proteins  
 Filter by category:

Proteins found:  
 1424

Enter (or paste) list of ORFs



| ORF    | Fn Summary Table |          |       | FnPg vs Fn |          |       | FnSg vs Fn |          |       | FnPgSg vs Fn |          |       | FnPgSg vs FnPg                                   |          |      | FnSg vs FnPg |       |        | FnPgSg vs FnSg |        |       | Fn Coverage |        |        |  |
|--------|------------------|----------|-------|------------|----------|-------|------------|----------|-------|--------------|----------|-------|--------------------------------------------------|----------|------|--------------|-------|--------|----------------|--------|-------|-------------|--------|--------|--|
|        | Fn               |          |       | FnPg       |          |       | FnSg       |          |       | FnPgSg       |          |       | Description                                      |          |      |              | Fn    |        | FnPg           |        | FnSg  |             | FnPgSg |        |  |
|        | n                | coverage | prob  | n          | coverage | prob  | n          | coverage | prob  | n            | coverage | prob  | n                                                | coverage | prob | Description  | Rep I | Rep II | Rep I          | Rep II | Rep I | Rep II      | Rep I  | Rep II |  |
| FN1191 | 7                | 28.8%    | 1.000 | 2          | 18.5%    | 0.960 | 13         | 56.4%    | 1.000 | 8            | 37.9%    | 1.000 | AAL95387.1  unknown                              |          |      |              |       |        |                |        |       |             |        |        |  |
|        | 7                | 25.5%    | 1.000 | 8          | 35.0%    | 1.000 | 11         | 53.5%    | 1.000 | 6            | 21.8%    | 1.000 |                                                  |          |      |              |       |        |                |        |       |             |        |        |  |
| FN1192 | 9                | 56.7%    | 1.000 | 7          | 47.8%    | 1.000 | 7          | 55.6%    | 1.000 | 11           | 80.0%    | 1.000 | AAL95388.1  unknown                              |          |      |              |       |        |                |        |       |             |        |        |  |
|        | 9                | 55.6%    | 1.000 | 9          | 88.9%    | 1.000 | 7          | 55.6%    | 1.000 | 10           | 64.4%    | 1.000 |                                                  |          |      |              |       |        |                |        |       |             |        |        |  |
| FN1198 | 10               | 24.8%    | 1.000 | 9          | 19.5%    | 1.000 | 16         | 35.7%    | 1.000 | 10           | 27.1%    | 1.000 | AAL95394.1  Transporter                          |          |      |              |       |        |                |        |       |             |        |        |  |
|        | 7                | 16.7%    | 1.000 | 17         | 31.9%    | 1.000 | 21         | 42.1%    | 1.000 | 8            | 17.1%    | 1.000 |                                                  |          |      |              |       |        |                |        |       |             |        |        |  |
| FN1200 | 2                | 9.7%     | 0.977 | 0          | 0.0%     | 0.000 | 25         | 72.6%    | 1.000 | 3            | 11.6%    | 1.000 | AAL95396.1  Hypothetical protein                 |          |      |              |       |        |                |        |       |             |        |        |  |
|        | 2                | 9.7%     | 0.800 | 27         | 75.7%    | 1.000 | 25         | 71.8%    | 1.000 | 4            | 14.7%    | 1.000 |                                                  |          |      |              |       |        |                |        |       |             |        |        |  |
| FN1201 | 2                | 9.7%     | 0.996 | 1          | 9.7%     | 0.915 | 1          | 9.7%     | 0.744 | 1            | 9.7%     | 0.429 | AAL95397.1  unknown                              |          |      |              |       |        |                |        |       |             |        |        |  |
|        | 2                | 9.7%     | 0.994 | 2          | 9.7%     | 0.996 | 3          | 26.6%    | 0.996 | 0            | 0.0%     | 0.000 |                                                  |          |      |              |       |        |                |        |       |             |        |        |  |
| FN1202 | 5                | 21.7%    | 1.000 | 7          | 24.4%    | 1.000 | 9          | 34.9%    | 1.000 | 10           | 35.7%    | 1.000 | AAL95398.1  NH(3)-dependent NAD(+) synthetase    |          |      |              |       |        |                |        |       |             |        |        |  |
|        | 2                | 5.8%     | 0.742 | 14         | 55.0%    | 1.000 | 6          | 24.4%    | 1.000 | 6            | 20.2%    | 1.000 |                                                  |          |      |              |       |        |                |        |       |             |        |        |  |
| FN1203 | 2                | 11.1%    | 0.999 | 3          | 9.7%     | 1.000 | 5          | 19.4%    | 1.000 | 2            | 11.1%    | 0.993 | AAL95399.1  GTP-binding protein                  |          |      |              |       |        |                |        |       |             |        |        |  |
|        | 4                | 19.7%    | 1.000 | 3          | 15.6%    | 1.000 | 5          | 22.8%    | 1.000 | 1            | 5.2%     | 0.967 |                                                  |          |      |              |       |        |                |        |       |             |        |        |  |
| FN1204 | 3                | 20.4%    | 1.000 | 5          | 27.7%    | 1.000 | 6          | 37.0%    | 1.000 | 1            | 11.1%    | 0.989 | AAL95400.1  Methyltransferase                    |          |      |              |       |        |                |        |       |             |        |        |  |
|        | 5                | 24.3%    | 1.000 | 5          | 30.6%    | 1.000 | 7          | 44.3%    | 1.000 | 1            | 3.0%     | 0.679 |                                                  |          |      |              |       |        |                |        |       |             |        |        |  |
| FN1205 | 21               | 46.4%    | 1.000 | 8          | 30.0%    | 1.000 | 17         | 44.3%    | 1.000 | 19           | 49.4%    | 1.000 | AAL95401.1  Protease                             |          |      |              |       |        |                |        |       |             |        |        |  |
|        | 19               | 47.5%    | 1.000 | 19         | 48.0%    | 1.000 | 14         | 43.3%    | 1.000 | 22           | 52.9%    | 1.000 |                                                  |          |      |              |       |        |                |        |       |             |        |        |  |
| FN1206 | 2                | 10.5%    | 0.999 | 2          | 11.7%    | 0.890 | 1          | 4.9%     | 0.984 | 2            | 8.6%     | 0.655 | AAL95402.1  Hemolysin                            |          |      |              |       |        |                |        |       |             |        |        |  |
|        | 4                | 10.5%    | 1.000 | 1          | 6.4%     | 0.307 | 2          | 10.5%    | 0.993 | 0            | 0.0%     | 0.000 |                                                  |          |      |              |       |        |                |        |       |             |        |        |  |
| FN1208 | 6                | 12.3%    | 1.000 | 4          | 12.3%    | 0.999 | 2          | 6.3%     | 0.999 | 3            | 5.3%     | 0.999 | AAL95404.1  1-deoxyxylulose-5-phosphate synthase |          |      |              |       |        |                |        |       |             |        |        |  |
|        | 5                | 10.5%    | 1.000 | 6          | 14.7%    | 1.000 | 8          | 15.2%    | 1.000 | 1            | 1.5%     | 0.373 |                                                  |          |      |              |       |        |                |        |       |             |        |        |  |
| FN1209 | 5                | 31.3%    | 1.000 | 2          | 21.2%    | 0.988 | 5          | 45.5%    | 1.000 | 5            | 38.4%    | 1.000 | AAL95405.1  Hypothetical RNA binding protein     |          |      |              |       |        |                |        |       |             |        |        |  |
|        | 6                | 41.4%    | 1.000 | 4          | 36.4%    | 1.000 | 5          | 31.3%    | 1.000 | 6            | 32.3%    | 1.000 |                                                  |          |      |              |       |        |                |        |       |             |        |        |  |
| FN1210 | 16               | 26.6%    | 1.000 | 8          | 18.4%    | 1.000 | 12         | 20.2%    | 1.000 | 15           | 22.5%    | 1.000 | AAL95406.1  Metal dependent hydrolase            |          |      |              |       |        |                |        |       |             |        |        |  |
|        | 17               | 26.2%    | 1.000 | 18         | 29.6%    | 1.000 | 14         | 22.9%    | 1.000 | 19           | 30.8%    | 1.000 |                                                  |          |      |              |       |        |                |        |       |             |        |        |  |
| FN1211 | 11               | 18.4%    | 1.000 | 3          | 7.8%     | 0.998 | 5          | 9.4%     | 1.000 | 7            | 14.3%    | 1.000 | AAL95407.1  Cell division protein ftsI           |          |      |              |       |        |                |        |       |             |        |        |  |
|        | 10               | 22.1%    | 1.000 | 6          | 11.0%    | 1.000 | 10         | 20.4%    | 1.000 | 3            | 5.3%     | 1.000 |                                                  |          |      |              |       |        |                |        |       |             |        |        |  |
| FN1213 | 13               | 44.6%    | 1.000 | 5          | 26.3%    | 1.000 | 9          | 40.4%    | 1.000 | 11           | 33.3%    | 1.000 | AAL95409.1  Hypothetical protein                 |          |      |              |       |        |                |        |       |             |        |        |  |
|        | 11               | 41.9%    | 1.000 | 13         | 38.5%    | 1.000 | 8          | 35.2%    | 1.000 | 8            | 25.1%    | 1.000 |                                                  |          |      |              |       |        |                |        |       |             |        |        |  |
| FN1214 | 1                | 3.0%     | 0.981 | 0          | 0.0%     | 0.000 | 1          | 2.3%     | 0.801 | 6            | 18.6%    | 1.000 | AAL95410.1  Fe-S oxidoreductase                  |          |      |              |       |        |                |        |       |             |        |        |  |
|        | 2                | 4.6%     | 0.939 | 1          | 3.9%     | 0.432 | 0          | 0.0%     | 0.000 | 4            | 9.0%     | 1.000 |                                                  |          |      |              |       |        |                |        |       |             |        |        |  |

Show detected proteins only  
 Show all proteins  
 Filter by category:

Proteins found:  
 1424

Enter (or paste) list of ORFs

|        |    | Fn Summary Table |          |      | FnPg vs Fn |          |      | FnSg vs Fn |          |      | FnPgSg vs Fn |          |                                                                         | FnPgSg vs FnPg |          |      | FnSg vs FnPg |        |       | FnPgSg vs FnSg |       |        | Fn Coverage |        |  |        |  |
|--------|----|------------------|----------|------|------------|----------|------|------------|----------|------|--------------|----------|-------------------------------------------------------------------------|----------------|----------|------|--------------|--------|-------|----------------|-------|--------|-------------|--------|--|--------|--|
| ORF    |    | Fn               |          |      | FnPg       |          |      | FnSg       |          |      | FnPgSg       |          |                                                                         | Description    |          |      |              |        |       | Fn             |       | FnPg   |             | FnSg   |  | FnPgSg |  |
|        |    | n                | coverage | prob | n          | coverage | prob | n          | coverage | prob | n            | coverage | prob                                                                    | n              | coverage | prob | Rep I        | Rep II | Rep I | Rep II         | Rep I | Rep II | Rep I       | Rep II |  |        |  |
| FN1216 | 5  | 44.8%            | 1.000    | 4    | 37.8%      | 1.000    | 5    | 50.3%      | 1.000    | 3    | 19.6%        | 0.999    | AAL95412.1  RRF2 family protein                                         |                |          |      |              |        |       |                |       |        |             |        |  |        |  |
|        | 5  | 31.5%            | 1.000    | 5    | 48.3%      | 1.000    | 6    | 44.1%      | 1.000    | 4    | 31.5%        | 1.000    |                                                                         |                |          |      |              |        |       |                |       |        |             |        |  |        |  |
| FN1217 | 7  | 30.1%            | 1.000    | 2    | 9.6%       | 0.988    | 8    | 44.3%      | 1.000    | 3    | 14.5%        | 0.999    | AAL95413.1  Holliday junction DNA helicase ruvB                         |                |          |      |              |        |       |                |       |        |             |        |  |        |  |
|        | 8  | 31.9%            | 1.000    | 6    | 32.2%      | 1.000    | 10   | 37.3%      | 1.000    | 3    | 12.7%        | 0.961    |                                                                         |                |          |      |              |        |       |                |       |        |             |        |  |        |  |
| FN1218 | 1  | 4.0%             | 0.812    | 0    | 0.0%       | 0.000    | 4    | 22.0%      | 1.000    | 2    | 17.5%        | 0.992    | AAL95414.1  unknown                                                     |                |          |      |              |        |       |                |       |        |             |        |  |        |  |
|        | 2  | 15.0%            | 0.783    | 3    | 17.0%      | 1.000    | 4    | 21.0%      | 1.000    | 0    | 0.0%         | 0.000    |                                                                         |                |          |      |              |        |       |                |       |        |             |        |  |        |  |
| FN1219 | 3  | 12.6%            | 1.000    | 4    | 25.2%      | 1.000    | 3    | 34.4%      | 1.000    | 5    | 30.5%        | 1.000    | AAL95415.1  Hypothetical protein                                        |                |          |      |              |        |       |                |       |        |             |        |  |        |  |
|        | 4  | 18.5%            | 1.000    | 5    | 24.5%      | 1.000    | 5    | 45.7%      | 1.000    | 5    | 30.5%        | 1.000    |                                                                         |                |          |      |              |        |       |                |       |        |             |        |  |        |  |
| FN1220 | 18 | 53.2%            | 1.000    | 17   | 53.8%      | 1.000    | 15   | 52.5%      | 1.000    | 20   | 51.3%        | 1.000    | AAL95416.1  Cysteine synthase                                           |                |          |      |              |        |       |                |       |        |             |        |  |        |  |
|        | 17 | 53.2%            | 1.000    | 18   | 63.9%      | 1.000    | 22   | 64.2%      | 1.000    | 19   | 55.4%        | 1.000    |                                                                         |                |          |      |              |        |       |                |       |        |             |        |  |        |  |
| FN1221 | 4  | 20.5%            | 1.000    | 4    | 14.9%      | 1.000    | 7    | 28.1%      | 1.000    | 7    | 26.4%        | 1.000    | AAL95417.1  Hypothetical protein                                        |                |          |      |              |        |       |                |       |        |             |        |  |        |  |
|        | 5  | 26.4%            | 1.000    | 11   | 41.0%      | 1.000    | 5    | 13.2%      | 1.000    | 7    | 20.8%        | 1.000    |                                                                         |                |          |      |              |        |       |                |       |        |             |        |  |        |  |
| FN1222 | 7  | 53.5%            | 1.000    | 4    | 31.8%      | 1.000    | 1    | 7.0%       | 0.501    | 4    | 30.2%        | 1.000    | AAL95418.1  Hypothetical protein                                        |                |          |      |              |        |       |                |       |        |             |        |  |        |  |
|        | 6  | 53.5%            | 1.000    | 6    | 53.5%      | 1.000    | 4    | 40.3%      | 1.000    | 6    | 36.4%        | 1.000    |                                                                         |                |          |      |              |        |       |                |       |        |             |        |  |        |  |
| FN1223 | 6  | 52.0%            | 1.000    | 3    | 37.7%      | 1.000    | 5    | 42.3%      | 1.000    | 7    | 52.0%        | 1.000    | AAL95419.1  Oxygen-insensitive NAD(P)H nitroreductase                   |                |          |      |              |        |       |                |       |        |             |        |  |        |  |
|        | 6  | 52.0%            | 1.000    | 11   | 60.0%      | 1.000    | 6    | 42.9%      | 1.000    | 6    | 52.0%        | 1.000    |                                                                         |                |          |      |              |        |       |                |       |        |             |        |  |        |  |
| FN1224 | 23 | 71.7%            | 1.000    | 13   | 42.3%      | 1.000    | 18   | 57.0%      | 1.000    | 21   | 65.4%        | 1.000    | AAL95420.1  2-dehydro-3-deoxyphosphooctonate aldolase                   |                |          |      |              |        |       |                |       |        |             |        |  |        |  |
|        | 23 | 65.0%            | 1.000    | 23   | 68.5%      | 1.000    | 18   | 59.4%      | 1.000    | 19   | 65.0%        | 1.000    |                                                                         |                |          |      |              |        |       |                |       |        |             |        |  |        |  |
| FN1225 | 22 | 37.7%            | 1.000    | 13   | 24.3%      | 1.000    | 21   | 44.7%      | 1.000    | 28   | 51.3%        | 1.000    | AAL95421.1  UDP-N-acetylmuramoyl-L-alanyl-D-glutamate--meso-lanthionine |                |          |      |              |        |       |                |       |        |             |        |  |        |  |
|        | 18 | 31.1%            | 1.000    | 28   | 43.5%      | 1.000    | 23   | 37.9%      | 1.000    | 26   | 47.4%        | 1.000    |                                                                         |                |          |      |              |        |       |                |       |        |             |        |  |        |  |
| FN1226 | 18 | 66.8%            | 1.000    | 10   | 37.6%      | 1.000    | 18   | 70.4%      | 1.000    | 15   | 56.2%        | 1.000    | AAL95422.1  Uracil-DNA glycosylase                                      |                |          |      |              |        |       |                |       |        |             |        |  |        |  |
|        | 17 | 66.8%            | 1.000    | 18   | 64.2%      | 1.000    | 21   | 64.2%      | 1.000    | 12   | 48.7%        | 1.000    |                                                                         |                |          |      |              |        |       |                |       |        |             |        |  |        |  |
| FN1229 | 3  | 17.8%            | 0.995    | 2    | 19.2%      | 0.483    | 0    | 0.0%       |          | 1    | 6.2%         | 0.967    | AAL95425.1  Hypothetical protein                                        |                |          |      |              |        |       |                |       |        |             |        |  |        |  |
|        | 3  | 12.3%            | 1.000    | 1    | 6.2%       | 0.964    | 0    | 0.0%       |          | 0    | 0.0%         | 0.000    |                                                                         |                |          |      |              |        |       |                |       |        |             |        |  |        |  |
| FN1230 | 14 | 58.6%            | 1.000    | 0    | 0.0%       | 0.000    | 0    | 0.0%       |          | 10   | 50.6%        | 1.000    | AAL95426.1  Hypothetical cytosolic protein                              |                |          |      |              |        |       |                |       |        |             |        |  |        |  |
|        | 12 | 58.6%            | 1.000    | 1    | 6.8%       | 0.810    | 0    | 0.0%       |          | 8    | 45.7%        | 1.000    |                                                                         |                |          |      |              |        |       |                |       |        |             |        |  |        |  |
| FN1231 | 50 | 76.6%            | 1.000    | 27   | 56.1%      | 1.000    | 45   | 79.1%      | 1.000    | 61   | 81.7%        | 1.000    | AAL95427.1  Inosine-5'-monophosphate dehydrogenase                      |                |          |      |              |        |       |                |       |        |             |        |  |        |  |
|        | 49 | 80.3%            | 1.000    | 56   | 85.0%      | 1.000    | 48   | 78.9%      | 1.000    | 57   | 80.9%        | 1.000    |                                                                         |                |          |      |              |        |       |                |       |        |             |        |  |        |  |
| FN1233 | 3  | 29.4%            | 0.999    | 0    | 0.0%       | 0.000    | 1    | 11.1%      | 0.983    | 2    | 14.4%        | 0.999    | AAL95429.1  Putative NAD(P)H oxidoreductase                             |                |          |      |              |        |       |                |       |        |             |        |  |        |  |
|        | 3  | 22.2%            | 0.999    | 2    | 17.2%      | 0.993    | 3    | 25.0%      | 1.000    | 1    | 8.3%         | 0.690    |                                                                         |                |          |      |              |        |       |                |       |        |             |        |  |        |  |
| FN1234 | 4  | 15.1%            | 1.000    | 0    | 0.0%       | 0.000    | 2    | 11.9%      | 0.997    | 3    | 11.5%        | 0.979    | AAL95430.1  Hypothetical protein                                        |                |          |      |              |        |       |                |       |        |             |        |  |        |  |
|        | 3  | 7.3%             | 0.984    | 2    | 10.1%      | 0.780    | 5    | 20.6%      | 1.000    | 3    | 9.6%         | 0.987    |                                                                         |                |          |      |              |        |       |                |       |        |             |        |  |        |  |

- Show detected proteins only
- Show all proteins

Filter by category:

GO: amino acid transport

Proteins found:  
1424

Enter (or paste) list of ORFs

Find ORFs

Dot Plots Dot Plots

| ORF    | Fn Summary Table |          |       | FnPg vs Fn |          |       | FnSg vs Fn |          |       | FnPgSg vs Fn |          |       | FnPgSg vs FnPg                                                |          |      | FnSg vs FnPg |       |        | FnPgSg vs FnSg |        |       | Fn Coverage |        |        |  |
|--------|------------------|----------|-------|------------|----------|-------|------------|----------|-------|--------------|----------|-------|---------------------------------------------------------------|----------|------|--------------|-------|--------|----------------|--------|-------|-------------|--------|--------|--|
|        | Fn               |          |       | FnPg       |          |       | FnSg       |          |       | FnPgSg       |          |       | Description                                                   |          |      |              | Fn    |        | FnPg           |        | FnSg  |             | FnPgSg |        |  |
|        | n                | coverage | prob  | n          | coverage | prob  | n          | coverage | prob  | n            | coverage | prob  | n                                                             | coverage | prob | Description  | Rep I | Rep II | Rep I          | Rep II | Rep I | Rep II      | Rep I  | Rep II |  |
| FN1235 | 4                | 22.4%    | 1.000 | 4          | 19.9%    | 1.000 | 13         | 50.9%    | 1.000 | 7            | 24.3%    | 1.000 | AAL95431.1  Ankyrin repeat proteins                           |          |      |              |       |        |                |        |       |             |        |        |  |
|        | 2                | 11.7%    | 0.999 | 9          | 31.2%    | 1.000 | 10         | 35.4%    | 1.000 | 4            | 18.0%    | 1.000 |                                                               |          |      |              |       |        |                |        |       |             |        |        |  |
| FN1237 | 10               | 20.0%    | 1.000 | 16         | 26.2%    | 1.000 | 26         | 40.3%    | 1.000 | 15           | 28.7%    | 1.000 | AAL95433.1  Choline kinase                                    |          |      |              |       |        |                |        |       |             |        |        |  |
|        | 12               | 23.4%    | 1.000 | 27         | 39.1%    | 1.000 | 32         | 42.3%    | 1.000 | 13           | 27.3%    | 1.000 |                                                               |          |      |              |       |        |                |        |       |             |        |        |  |
| FN1238 | 2                | 5.8%     | 0.994 | 0          | 0.0%     | 0.000 | 1          | 2.5%     | 0.594 | 0            | 0.0%     | 0.000 | AAL95434.1  Hypothetical protein                              |          |      |              |       |        |                |        |       |             |        |        |  |
|        | 2                | 5.8%     | 0.990 | 3          | 12.1%    | 0.995 | 3          | 9.6%     | 0.993 | 1            | 3.3%     | 0.986 |                                                               |          |      |              |       |        |                |        |       |             |        |        |  |
| FN1239 | 1                | 3.3%     | 0.893 | 0          | 0.0%     | 0.000 | 0          | 0.0%     | 0.000 | 1            | 7.0%     | 0.632 | AAL95435.1  Hypothetical protein                              |          |      |              |       |        |                |        |       |             |        |        |  |
|        | 0                | 0.0%     | 0.000 | 5          | 22.0%    | 1.000 | 2          | 7.5%     | 0.976 | 0            | 0.0%     | 0.000 |                                                               |          |      |              |       |        |                |        |       |             |        |        |  |
| FN1240 | 4                | 21.7%    | 1.000 | 3          | 12.5%    | 1.000 | 3          | 15.4%    | 0.999 | 3            | 12.1%    | 1.000 | AAL95436.1  Lipopolysaccharide core biosynthesis protein rfaY |          |      |              |       |        |                |        |       |             |        |        |  |
|        | 4                | 16.7%    | 1.000 | 3          | 15.0%    | 0.997 | 3          | 19.2%    | 0.993 | 3            | 10.8%    | 0.970 |                                                               |          |      |              |       |        |                |        |       |             |        |        |  |
| FN1241 | 3                | 10.3%    | 1.000 | 4          | 19.3%    | 1.000 | 3          | 9.1%     | 1.000 | 2            | 4.5%     | 0.999 | AAL95437.1  polysaccharide biosynthesis protein               |          |      |              |       |        |                |        |       |             |        |        |  |
|        | 3                | 9.9%     | 0.999 | 3          | 14.8%    | 0.999 | 7          | 33.3%    | 1.000 | 1            | 4.5%     | 0.297 |                                                               |          |      |              |       |        |                |        |       |             |        |        |  |
| FN1242 | 5                | 19.2%    | 1.000 | 2          | 6.4%     | 0.994 | 8          | 27.5%    | 1.000 | 4            | 13.9%    | 1.000 | AAL95438.1  Polysaccharide deacetylase                        |          |      |              |       |        |                |        |       |             |        |        |  |
|        | 8                | 31.4%    | 1.000 | 8          | 29.4%    | 1.000 | 9          | 31.9%    | 1.000 | 3            | 13.9%    | 0.998 |                                                               |          |      |              |       |        |                |        |       |             |        |        |  |
| FN1243 | 7                | 27.3%    | 1.000 | 1          | 3.5%     | 0.984 | 7          | 19.2%    | 1.000 | 6            | 22.4%    | 1.000 | AAL95439.1  Glycosyl transferase                              |          |      |              |       |        |                |        |       |             |        |        |  |
|        | 4                | 12.2%    | 1.000 | 5          | 18.9%    | 1.000 | 6          | 19.2%    | 1.000 | 5            | 18.5%    | 1.000 |                                                               |          |      |              |       |        |                |        |       |             |        |        |  |
| FN1244 | 5                | 22.8%    | 1.000 | 3          | 10.8%    | 1.000 | 8          | 31.6%    | 1.000 | 4            | 15.2%    | 1.000 | AAL95440.1  Polysaccharide deacetylase                        |          |      |              |       |        |                |        |       |             |        |        |  |
|        | 5                | 21.2%    | 1.000 | 13         | 48.4%    | 1.000 | 12         | 44.8%    | 1.000 | 4            | 18.0%    | 1.000 |                                                               |          |      |              |       |        |                |        |       |             |        |        |  |
| FN1245 | 9                | 22.0%    | 1.000 | 3          | 9.4%     | 1.000 | 3          | 9.4%     | 1.000 | 2            | 5.8%     | 0.669 | AAL95441.1  Glycosyl transferase                              |          |      |              |       |        |                |        |       |             |        |        |  |
|        | 6                | 11.3%    | 1.000 | 4          | 8.1%     | 1.000 | 5          | 10.5%    | 1.000 | 1            | 2.4%     | 0.386 |                                                               |          |      |              |       |        |                |        |       |             |        |        |  |
| FN1246 | 7                | 26.4%    | 1.000 | 2          | 11.1%    | 0.958 | 6          | 31.8%    | 1.000 | 2            | 8.4%     | 0.995 | AAL95442.1  Lipooligosaccharide cholinephosphotransferase     |          |      |              |       |        |                |        |       |             |        |        |  |
|        | 5                | 21.8%    | 1.000 | 6          | 23.4%    | 1.000 | 6          | 30.3%    | 1.000 | 3            | 14.6%    | 1.000 |                                                               |          |      |              |       |        |                |        |       |             |        |        |  |
| FN1247 | 8                | 16.9%    | 1.000 | 4          | 11.1%    | 1.000 | 10         | 29.8%    | 1.000 | 3            | 7.7%     | 1.000 | AAL95443.1  LOS biosynthesis enzyme LBGB                      |          |      |              |       |        |                |        |       |             |        |        |  |
|        | 7                | 19.0%    | 1.000 | 9          | 25.1%    | 1.000 | 17         | 41.2%    | 1.000 | 3            | 10.6%    | 1.000 |                                                               |          |      |              |       |        |                |        |       |             |        |        |  |
| FN1248 | 3                | 15.7%    | 1.000 | 2          | 5.4%     | 0.999 | 0          | 0.0%     |       | 0            | 0.0%     |       | AAL95444.1  Hypothetical cytosolic protein                    |          |      |              |       |        |                |        |       |             |        |        |  |
|        | 2                | 10.3%    | 0.971 | 0          | 0.0%     | 0.000 | 0          | 0.0%     |       | 0            | 0.0%     |       |                                                               |          |      |              |       |        |                |        |       |             |        |        |  |
| FN1250 | 8                | 8.3%     | 1.000 | 4          | 6.5%     | 1.000 | 6          | 6.7%     | 1.000 | 5            | 8.0%     | 1.000 | AAL95446.1  Guanine-hypoxanthine permease                     |          |      |              |       |        |                |        |       |             |        |        |  |
|        | 7                | 6.7%     | 1.000 | 6          | 6.7%     | 1.000 | 6          | 6.7%     | 1.000 | 8            | 8.3%     | 1.000 |                                                               |          |      |              |       |        |                |        |       |             |        |        |  |
| FN1251 | 5                | 16.4%    | 1.000 | 1          | 2.3%     | 0.984 | 6          | 13.9%    | 1.000 | 6            | 15.5%    | 1.000 | AAL95447.1  High-affinity iron permease                       |          |      |              |       |        |                |        |       |             |        |        |  |
|        | 5                | 15.9%    | 1.000 | 4          | 12.2%    | 1.000 | 3          | 7.6%     | 1.000 | 5            | 15.5%    | 1.000 |                                                               |          |      |              |       |        |                |        |       |             |        |        |  |
| FN1252 | 22               | 86.8%    | 1.000 | 18         | 86.8%    | 1.000 | 19         | 86.8%    | 1.000 | 24           | 83.8%    | 1.000 | AAL95448.1  34 kDa membrane antigen precursor                 |          |      |              |       |        |                |        |       |             |        |        |  |
|        | 23               | 79.8%    | 1.000 | 21         | 86.8%    | 1.000 | 20         | 94.3%    | 1.000 | 22           | 83.8%    | 1.000 |                                                               |          |      |              |       |        |                |        |       |             |        |        |  |

Show detected proteins only  
 Show all proteins  
 Filter by category:

Proteins found:  
 1424

Enter (or paste) list of ORFs

| ORF    | Fn Summary Table |          |       | FnPg vs Fn |          |       | FnSg vs Fn |          |       | FnPgSg vs Fn |          |       | FnPgSg vs FnPg |          |       | FnSg vs FnPg                                             |       |        | FnPgSg vs FnSg |        |       | Fn Coverage |        |        |  |
|--------|------------------|----------|-------|------------|----------|-------|------------|----------|-------|--------------|----------|-------|----------------|----------|-------|----------------------------------------------------------|-------|--------|----------------|--------|-------|-------------|--------|--------|--|
|        | Fn               |          |       | FnPg       |          |       | FnSg       |          |       | FnPgSg       |          |       | Description    |          |       |                                                          | Fn    |        | FnPg           |        | FnSg  |             | FnPgSg |        |  |
|        | n                | coverage | prob  | n          | coverage | prob  | n          | coverage | prob  | n            | coverage | prob  | n              | coverage | prob  | Description                                              | Rep I | Rep II | Rep I          | Rep II | Rep I | Rep II      | Rep I  | Rep II |  |
| FN1253 | 6                | 72.4%    | 1.000 | 4          | 72.4%    | 1.000 | 4          | 72.4%    | 1.000 | 4            | 72.4%    | 1.000 | 7              | 96.6%    | 1.000 | AAL95449.1  unknown                                      |       |        |                |        |       |             |        |        |  |
|        | 6                | 72.4%    | 1.000 | 4          | 72.4%    | 1.000 | 4          | 72.4%    | 1.000 | 4            | 72.4%    | 1.000 | 7              | 96.6%    | 1.000 |                                                          |       |        |                |        |       |             |        |        |  |
| FN1254 | 10               | 33.3%    | 1.000 | 7          | 27.5%    | 1.000 | 6          | 27.5%    | 1.000 | 11           | 33.9%    | 1.000 | 11             | 33.9%    | 1.000 | AAL95450.1  Oxygen-insensitive NAD(P)H nitroreductase    |       |        |                |        |       |             |        |        |  |
|        | 11               | 33.3%    | 1.000 | 9          | 33.3%    | 1.000 | 7          | 33.3%    | 1.000 | 11           | 33.3%    | 1.000 | 11             | 33.3%    | 1.000 |                                                          |       |        |                |        |       |             |        |        |  |
| FN1255 | 5                | 15.6%    | 1.000 | 1          | 8.7%     | 0.487 | 0          | 0.0%     | 0.000 | 2            | 8.4%     | 1.000 | 2              | 8.4%     | 1.000 | AAL95451.1  NagD protein                                 |       |        |                |        |       |             |        |        |  |
|        | 5                | 22.5%    | 1.000 | 1          | 6.9%     | 0.513 | 1          | 4.7%     | 0.330 | 2            | 8.4%     | 0.995 | 2              | 8.4%     | 0.995 |                                                          |       |        |                |        |       |             |        |        |  |
| FN1256 | 3                | 4.2%     | 0.933 | 0          | 0.0%     | 0.000 | 0          | 0.0%     |       | 2            | 4.9%     | 0.994 | 2              | 4.9%     | 0.994 | AAL95452.1  C4-dicarboxylate transporter large subunit   |       |        |                |        |       |             |        |        |  |
|        | 2                | 4.0%     | 0.684 | 3          | 9.1%     | 0.999 | 0          | 0.0%     |       | 3            | 7.5%     | 1.000 | 3              | 7.5%     | 1.000 |                                                          |       |        |                |        |       |             |        |        |  |
| FN1258 | 37               | 48.0%    | 1.000 | 26         | 48.3%    | 1.000 | 26         | 50.8%    | 1.000 | 33           | 45.9%    | 1.000 | 33             | 45.9%    | 1.000 | AAL95454.1  C4-dicarboxylate-binding protein             |       |        |                |        |       |             |        |        |  |
|        | 35               | 43.5%    | 1.000 | 23         | 48.0%    | 1.000 | 23         | 47.7%    | 1.000 | 34           | 43.5%    | 1.000 | 34             | 43.5%    | 1.000 |                                                          |       |        |                |        |       |             |        |        |  |
| FN1259 | 1                | 8.6%     | 0.829 | 0          | 0.0%     | 0.000 | 1          | 6.6%     | 0.981 | 2            | 12.2%    | 0.633 | 2              | 12.2%    | 0.633 | AAL95455.1  hypothetical protein                         |       |        |                |        |       |             |        |        |  |
|        | 1                | 6.6%     | 0.982 | 1          | 6.6%     | 0.982 | 4          | 19.8%    | 1.000 | 1            | 3.6%     | 0.473 | 1              | 3.6%     | 0.473 |                                                          |       |        |                |        |       |             |        |        |  |
| FN1260 | 3                | 8.0%     | 0.985 | 1          | 3.3%     | 0.421 | 2          | 2.8%     | 0.965 | 3            | 8.0%     | 0.896 | 3              | 8.0%     | 0.896 | AAL95456.1  Sensory Transduction Protein Kinase          |       |        |                |        |       |             |        |        |  |
|        | 2                | 2.8%     | 0.995 | 1          | 2.8%     | 0.774 | 1          | 2.8%     | 0.932 | 1            | 4.2%     | 0.664 | 1              | 4.2%     | 0.664 |                                                          |       |        |                |        |       |             |        |        |  |
| FN1261 | 2                | 9.0%     | 0.965 | 4          | 12.9%    | 1.000 | 1          | 6.0%     | 0.330 | 0            | 0.0%     |       | 0              | 0.0%     |       | AAL95457.1  Two-component response regulator             |       |        |                |        |       |             |        |        |  |
|        | 3                | 18.9%    | 0.963 | 1          | 6.0%     | 0.751 | 2          | 16.3%    | 0.991 | 0            | 0.0%     |       | 0              | 0.0%     |       |                                                          |       |        |                |        |       |             |        |        |  |
| FN1262 | 3                | 5.2%     | 0.965 | 0          | 0.0%     | 0.000 | 3          | 11.4%    | 1.000 | 0            | 0.0%     |       | 0              | 0.0%     |       | AAL95458.1  Integral membrane protein                    |       |        |                |        |       |             |        |        |  |
|        | 2                | 2.7%     | 0.945 | 3          | 6.7%     | 1.000 | 3          | 6.7%     | 1.000 | 0            | 0.0%     |       | 0              | 0.0%     |       |                                                          |       |        |                |        |       |             |        |        |  |
| FN1263 | 8                | 27.2%    | 1.000 | 3          | 21.9%    | 1.000 | 5          | 27.2%    | 1.000 | 8            | 33.9%    | 1.000 | 8              | 33.9%    | 1.000 | AAL95459.1  Cobalt chelataase                            |       |        |                |        |       |             |        |        |  |
|        | 7                | 30.7%    | 1.000 | 4          | 27.2%    | 1.000 | 9          | 31.8%    | 1.000 | 7            | 26.5%    | 1.000 | 7              | 26.5%    | 1.000 |                                                          |       |        |                |        |       |             |        |        |  |
| FN1264 | 4                | 39.2%    | 1.000 | 1          | 19.2%    | 0.356 | 4          | 40.0%    | 1.000 | 3            | 30.8%    | 1.000 | 3              | 30.8%    | 1.000 | AAL95460.1  Hypothetical protein                         |       |        |                |        |       |             |        |        |  |
|        | 6                | 39.2%    | 1.000 | 2          | 11.7%    | 0.999 | 4          | 48.3%    | 1.000 | 3            | 30.8%    | 1.000 | 3              | 30.8%    | 1.000 |                                                          |       |        |                |        |       |             |        |        |  |
| FN1265 | 9                | 44.1%    | 1.000 | 6          | 41.6%    | 1.000 | 12         | 64.9%    | 1.000 | 7            | 35.1%    | 1.000 | 7              | 35.1%    | 1.000 | AAL95461.1  Outer membrane protein                       |       |        |                |        |       |             |        |        |  |
|        | 10               | 44.1%    | 1.000 | 9          | 42.6%    | 1.000 | 10         | 59.9%    | 1.000 | 8            | 40.1%    | 1.000 | 8              | 40.1%    | 1.000 |                                                          |       |        |                |        |       |             |        |        |  |
| FN1266 | 14               | 51.8%    | 1.000 | 9          | 30.9%    | 1.000 | 16         | 52.8%    | 1.000 | 14           | 47.5%    | 1.000 | 14             | 47.5%    | 1.000 | AAL95462.1  UTP--glucose-1-phosphate uridylyltransferase |       |        |                |        |       |             |        |        |  |
|        | 18               | 54.2%    | 1.000 | 20         | 61.1%    | 1.000 | 17         | 52.8%    | 1.000 | 14           | 47.5%    | 1.000 | 14             | 47.5%    | 1.000 |                                                          |       |        |                |        |       |             |        |        |  |
| FN1267 | 8                | 23.9%    | 1.000 | 5          | 30.2%    | 1.000 | 9          | 40.0%    | 1.000 | 8            | 33.2%    | 1.000 | 8              | 33.2%    | 1.000 | AAL95463.1  Hypothetical protein                         |       |        |                |        |       |             |        |        |  |
|        | 8                | 27.3%    | 1.000 | 10         | 37.6%    | 1.000 | 5          | 27.8%    | 1.000 | 7            | 23.9%    | 1.000 | 7              | 23.9%    | 1.000 |                                                          |       |        |                |        |       |             |        |        |  |
| FN1268 | 45               | 58.6%    | 1.000 | 28         | 45.6%    | 1.000 | 32         | 48.7%    | 1.000 | 42           | 58.3%    | 1.000 | 42             | 58.3%    | 1.000 | AAL95464.1  Methionyl-tRNA synthetase                    |       |        |                |        |       |             |        |        |  |
|        | 42               | 53.8%    | 1.000 | 42         | 58.3%    | 1.000 | 33         | 46.7%    | 1.000 | 39           | 61.3%    | 1.000 | 39             | 61.3%    | 1.000 |                                                          |       |        |                |        |       |             |        |        |  |
| FN1269 | 5                | 31.1%    | 1.000 | 0          | 0.0%     | 0.000 | 3          | 23.0%    | 0.998 | 2            | 8.6%     | 0.941 | 2              | 8.6%     | 0.941 | AAL95465.1  Hypothetical lipoprotein                     |       |        |                |        |       |             |        |        |  |
|        | 6                | 27.3%    | 1.000 | 4          | 18.7%    | 0.999 | 2          | 17.7%    | 0.995 | 3            | 19.6%    | 0.999 | 3              | 19.6%    | 0.999 |                                                          |       |        |                |        |       |             |        |        |  |

Show detected proteins only  
 Show all proteins  
 Filter by category:

Proteins found:  
1424

Enter (or paste) list of ORFs

Find ORFs

[Dot Plots](#) [Dot Plots](#)

| ORF    | Fn Summary Table |          |       | FnPg vs Fn |          |       | FnSg vs Fn |          |       | FnPgSg vs Fn |          |       | FnPgSg vs FnPg                                          |          |      | FnSg vs FnPg |       |        | FnPgSg vs FnSg |        |       | Fn Coverage |        |        |  |
|--------|------------------|----------|-------|------------|----------|-------|------------|----------|-------|--------------|----------|-------|---------------------------------------------------------|----------|------|--------------|-------|--------|----------------|--------|-------|-------------|--------|--------|--|
|        | Fn               |          |       | FnPg       |          |       | FnSg       |          |       | FnPgSg       |          |       | Description                                             |          |      |              | Fn    |        | FnPg           |        | FnSg  |             | FnPgSg |        |  |
|        | n                | coverage | prob  | n          | coverage | prob  | n          | coverage | prob  | n            | coverage | prob  | n                                                       | coverage | prob | Description  | Rep I | Rep II | Rep I          | Rep II | Rep I | Rep II      | Rep I  | Rep II |  |
| FN1270 | 6                | 48.9%    | 1.000 | 2          | 20.5%    | 1.000 | 3          | 42.0%    | 1.000 | 7            | 53.4%    | 1.000 | AAL95466.1  Hypothetical cytosolic protein              |          |      |              |       |        |                |        |       |             |        |        |  |
|        | 5                | 33.0%    | 1.000 | 5          | 51.1%    | 1.000 | 2          | 26.1%    | 1.000 | 8            | 69.3%    | 1.000 |                                                         |          |      |              |       |        |                |        |       |             |        |        |  |
| FN1271 | 14               | 31.3%    | 1.000 | 6          | 8.7%     | 1.000 | 14         | 32.2%    | 1.000 | 14           | 36.3%    | 1.000 | AAL95467.1  Protease IV                                 |          |      |              |       |        |                |        |       |             |        |        |  |
|        | 15               | 33.6%    | 1.000 | 16         | 35.9%    | 1.000 | 12         | 27.1%    | 1.000 | 11           | 24.2%    | 1.000 |                                                         |          |      |              |       |        |                |        |       |             |        |        |  |
| FN1273 | 14               | 43.6%    | 1.000 | 3          | 16.9%    | 0.999 | 13         | 45.0%    | 1.000 | 7            | 22.3%    | 1.000 | AAL95469.1  Outer membrane protein tolC                 |          |      |              |       |        |                |        |       |             |        |        |  |
|        | 9                | 30.5%    | 1.000 | 17         | 47.0%    | 1.000 | 17         | 50.8%    | 1.000 | 7            | 22.8%    | 1.000 |                                                         |          |      |              |       |        |                |        |       |             |        |        |  |
| FN1274 | 8                | 29.2%    | 1.000 | 3          | 7.3%     | 1.000 | 7          | 26.8%    | 1.000 | 9            | 29.7%    | 1.000 | AAL95470.1  Acriflavin resistance protein E             |          |      |              |       |        |                |        |       |             |        |        |  |
|        | 10               | 32.2%    | 1.000 | 7          | 21.6%    | 1.000 | 9          | 31.9%    | 1.000 | 5            | 16.5%    | 1.000 |                                                         |          |      |              |       |        |                |        |       |             |        |        |  |
| FN1275 | 15               | 17.8%    | 1.000 | 5          | 8.4%     | 1.000 | 8          | 11.1%    | 1.000 | 9            | 11.9%    | 1.000 | AAL95471.1  Acriflavin resistance protein B             |          |      |              |       |        |                |        |       |             |        |        |  |
|        | 14               | 17.5%    | 1.000 | 11         | 12.7%    | 1.000 | 11         | 14.7%    | 1.000 | 8            | 9.6%     | 1.000 |                                                         |          |      |              |       |        |                |        |       |             |        |        |  |
| FN1276 | 2                | 16.0%    | 0.962 | 6          | 37.4%    | 1.000 | 5          | 26.0%    | 1.000 | 4            | 25.2%    | 1.000 | AAL95472.1  Hypothetical protein                        |          |      |              |       |        |                |        |       |             |        |        |  |
|        | 2                | 22.1%    | 0.999 | 6          | 48.1%    | 1.000 | 5          | 41.2%    | 1.000 | 5            | 37.4%    | 1.000 |                                                         |          |      |              |       |        |                |        |       |             |        |        |  |
| FN1277 | 29               | 45.7%    | 1.000 | 23         | 43.6%    | 1.000 | 34         | 55.3%    | 1.000 | 32           | 57.0%    | 1.000 | AAL95473.1  Aminoacyl-histidine dipeptidase             |          |      |              |       |        |                |        |       |             |        |        |  |
|        | 29               | 48.4%    | 1.000 | 42         | 63.2%    | 1.000 | 30         | 58.6%    | 1.000 | 33           | 52.7%    | 1.000 |                                                         |          |      |              |       |        |                |        |       |             |        |        |  |
| FN1278 | 1                | 5.4%     | 0.460 | 1          | 7.7%     | 0.981 | 1          | 7.7%     | 0.956 | 2            | 16.2%    | 0.993 | AAL95474.1  Acetyltransferase                           |          |      |              |       |        |                |        |       |             |        |        |  |
|        | 1                | 7.7%     | 0.974 | 3          | 16.9%    | 0.995 | 6          | 39.2%    | 1.000 | 4            | 36.9%    | 1.000 |                                                         |          |      |              |       |        |                |        |       |             |        |        |  |
| FN1279 | 16               | 47.9%    | 1.000 | 7          | 20.9%    | 1.000 | 10         | 28.5%    | 1.000 | 14           | 37.4%    | 1.000 | AAL95475.1  Zinc metallohydrolase, glyoxalase II family |          |      |              |       |        |                |        |       |             |        |        |  |
|        | 18               | 58.6%    | 1.000 | 15         | 47.5%    | 1.000 | 11         | 31.0%    | 1.000 | 12           | 36.8%    | 1.000 |                                                         |          |      |              |       |        |                |        |       |             |        |        |  |
| FN1280 | 4                | 7.9%     | 1.000 | 14         | 32.5%    | 1.000 | 17         | 36.6%    | 1.000 | 8            | 20.9%    | 1.000 | AAL95476.1  Serine protease, V8 family                  |          |      |              |       |        |                |        |       |             |        |        |  |
|        | 6                | 14.0%    | 1.000 | 16         | 38.2%    | 1.000 | 19         | 37.8%    | 1.000 | 3            | 4.1%     | 1.000 |                                                         |          |      |              |       |        |                |        |       |             |        |        |  |
| FN1281 | 4                | 10.6%    | 1.000 | 4          | 17.2%    | 1.000 | 7          | 21.6%    | 1.000 | 1            | 8.8%     | 0.739 | AAL95477.1  Cysteine protease                           |          |      |              |       |        |                |        |       |             |        |        |  |
|        | 3                | 7.8%     | 1.000 | 7          | 23.8%    | 1.000 | 6          | 21.2%    | 1.000 | 2            | 7.8%     | 0.999 |                                                         |          |      |              |       |        |                |        |       |             |        |        |  |
| FN1282 | 8                | 37.9%    | 1.000 | 7          | 24.1%    | 1.000 | 6          | 37.1%    | 1.000 | 8            | 37.9%    | 1.000 | AAL95478.1  LSU ribosomal protein L17P                  |          |      |              |       |        |                |        |       |             |        |        |  |
|        | 9                | 44.0%    | 1.000 | 7          | 44.0%    | 1.000 | 6          | 37.1%    | 1.000 | 8            | 44.0%    | 1.000 |                                                         |          |      |              |       |        |                |        |       |             |        |        |  |
| FN1283 | 33               | 68.1%    | 1.000 | 34         | 70.5%    | 1.000 | 29         | 68.7%    | 1.000 | 27           | 71.9%    | 1.000 | AAL95479.1  DNA-directed RNA polymerase alpha chain     |          |      |              |       |        |                |        |       |             |        |        |  |
|        | 34               | 68.1%    | 1.000 | 29         | 72.8%    | 1.000 | 26         | 64.3%    | 1.000 | 30           | 72.2%    | 1.000 |                                                         |          |      |              |       |        |                |        |       |             |        |        |  |
| FN1284 | 27               | 57.9%    | 1.000 | 19         | 53.3%    | 1.000 | 22         | 70.8%    | 1.000 | 28           | 57.9%    | 1.000 | AAL95480.1  SSU ribosomal protein S4P                   |          |      |              |       |        |                |        |       |             |        |        |  |
|        | 27               | 59.0%    | 1.000 | 21         | 62.1%    | 1.000 | 21         | 70.8%    | 1.000 | 26           | 53.3%    | 1.000 |                                                         |          |      |              |       |        |                |        |       |             |        |        |  |
| FN1285 | 7                | 59.7%    | 1.000 | 10         | 62.0%    | 1.000 | 3          | 47.3%    | 1.000 | 7            | 59.7%    | 1.000 | AAL95481.1  SSU ribosomal protein S11P                  |          |      |              |       |        |                |        |       |             |        |        |  |
|        | 5                | 47.3%    | 1.000 | 4          | 47.3%    | 1.000 | 5          | 47.3%    | 1.000 | 7            | 59.7%    | 1.000 |                                                         |          |      |              |       |        |                |        |       |             |        |        |  |
| FN1286 | 8                | 39.8%    | 1.000 | 5          | 25.4%    | 1.000 | 5          | 27.1%    | 1.000 | 10           | 39.8%    | 1.000 | AAL95482.1  SSU ribosomal protein S13P                  |          |      |              |       |        |                |        |       |             |        |        |  |
|        | 7                | 39.8%    | 1.000 | 6          | 41.5%    | 1.000 | 6          | 39.8%    | 1.000 | 10           | 39.8%    | 1.000 |                                                         |          |      |              |       |        |                |        |       |             |        |        |  |

Show detected proteins only  
 Show all proteins

Proteins found:  
1424

Enter (or paste) list of ORFs

Filter by category:

GO: amino acid transport

Find ORFs

Dot Plots Dot Plots

| ORF    | Fn Summary Table |          |       | FnPg vs Fn |          |       | FnSg vs Fn |          |       | FnPgSg vs Fn |          |       | FnPgSg vs FnPg                                  |          |       | FnSg vs FnPg                                                          |       |        | FnPgSg vs FnSg |        |       | Fn Coverage |        |        |  |
|--------|------------------|----------|-------|------------|----------|-------|------------|----------|-------|--------------|----------|-------|-------------------------------------------------|----------|-------|-----------------------------------------------------------------------|-------|--------|----------------|--------|-------|-------------|--------|--------|--|
|        | Fn               |          |       | FnPg       |          |       | FnSg       |          |       | FnPgSg       |          |       | Description                                     |          |       |                                                                       | Fn    |        | FnPg           |        | FnSg  |             | FnPgSg |        |  |
|        | n                | coverage | prob  | n          | coverage | prob  | n          | coverage | prob  | n            | coverage | prob  | n                                               | coverage | prob  | Description                                                           | Rep I | Rep II | Rep I          | Rep II | Rep I | Rep II      | Rep I  | Rep II |  |
| FN1287 | 3                | 41.5%    | 1.000 | 3          | 41.5%    | 1.000 | 3          | 41.5%    | 1.000 | 3            | 41.5%    | 1.000 | 3                                               | 41.5%    | 1.000 | AAL95483.1  Bacterial Protein Translation Initiation Factor 1 (IF -1) |       |        |                |        |       |             |        |        |  |
|        | 3                | 41.5%    | 1.000 | 3          | 41.5%    | 1.000 | 3          | 41.5%    | 1.000 | 3            | 41.5%    | 1.000 | 3                                               | 41.5%    | 1.000 |                                                                       |       |        |                |        |       |             |        |        |  |
| FN1290 | 8                | 15.9%    | 1.000 | 11         | 32.1%    | 1.000 | 6          | 22.6%    | 1.000 | 3            | 12.9%    | 0.996 | AAL95486.1  Hypothetical protein                |          |       |                                                                       |       |        |                |        |       |             |        |        |  |
|        | 13               | 39.4%    | 1.000 | 4          | 13.5%    | 1.000 | 5          | 23.5%    | 1.000 | 7            | 19.7%    | 1.000 |                                                 |          |       |                                                                       |       |        |                |        |       |             |        |        |  |
| FN1293 | 3                | 5.3%     | 1.000 | 0          | 0.0%     |       | 3          | 6.1%     | 0.723 | 2            | 5.3%     | 0.995 | AAL95489.1  Hypothetical protein                |          |       |                                                                       |       |        |                |        |       |             |        |        |  |
|        | 3                | 5.3%     | 1.000 | 0          | 0.0%     |       | 2          | 4.6%     | 0.997 | 3            | 7.4%     | 1.000 |                                                 |          |       |                                                                       |       |        |                |        |       |             |        |        |  |
| FN1296 | 8                | 58.6%    | 1.000 | 0          | 0.0%     |       | 0          | 0.0%     |       | 7            | 52.7%    | 1.000 | AAL95492.1  unknown                             |          |       |                                                                       |       |        |                |        |       |             |        |        |  |
|        | 9                | 65.1%    | 1.000 | 0          | 0.0%     |       | 0          | 0.0%     |       | 3            | 20.1%    | 1.000 |                                                 |          |       |                                                                       |       |        |                |        |       |             |        |        |  |
| FN1297 | 10               | 33.1%    | 1.000 | 6          | 29.1%    | 1.000 | 10         | 42.1%    | 1.000 | 13           | 52.0%    | 1.000 | AAL95493.1  Methionine aminopeptidase           |          |       |                                                                       |       |        |                |        |       |             |        |        |  |
|        | 10               | 33.1%    | 1.000 | 11         | 39.4%    | 1.000 | 11         | 39.4%    | 1.000 | 13           | 46.1%    | 1.000 |                                                 |          |       |                                                                       |       |        |                |        |       |             |        |        |  |
| FN1298 | 17               | 51.2%    | 1.000 | 18         | 47.4%    | 1.000 | 11         | 37.4%    | 1.000 | 14           | 50.7%    | 1.000 | AAL95494.1  Adenylate kinase                    |          |       |                                                                       |       |        |                |        |       |             |        |        |  |
|        | 16               | 51.2%    | 1.000 | 18         | 58.3%    | 1.000 | 11         | 45.0%    | 1.000 | 14           | 51.2%    | 1.000 |                                                 |          |       |                                                                       |       |        |                |        |       |             |        |        |  |
| FN1299 | 2                | 8.4%     | 0.979 | 1          | 5.8%     | 0.813 | 3          | 14.6%    | 0.919 | 1            | 5.8%     | 0.710 | AAL95495.1  dTDP-glucose 4,6-dehydratase        |          |       |                                                                       |       |        |                |        |       |             |        |        |  |
|        | 1                | 5.8%     | 0.979 | 5          | 20.1%    | 1.000 | 5          | 19.4%    | 1.000 | 2            | 10.7%    | 0.999 |                                                 |          |       |                                                                       |       |        |                |        |       |             |        |        |  |
| FN1301 | 21               | 36.5%    | 1.000 | 15         | 25.0%    | 1.000 | 16         | 34.9%    | 1.000 | 18           | 39.1%    | 1.000 | AAL95497.1  ABC transporter ATP-binding protein |          |       |                                                                       |       |        |                |        |       |             |        |        |  |
|        | 22               | 36.7%    | 1.000 | 11         | 20.0%    | 1.000 | 18         | 36.0%    | 1.000 | 20           | 30.6%    | 1.000 |                                                 |          |       |                                                                       |       |        |                |        |       |             |        |        |  |
| FN1302 | 9                | 72.2%    | 1.000 | 7          | 68.1%    | 1.000 | 5          | 69.4%    | 1.000 | 7            | 59.7%    | 1.000 | AAL95498.1  Hypothetical protein                |          |       |                                                                       |       |        |                |        |       |             |        |        |  |
|        | 8                | 62.5%    | 1.000 | 7          | 80.6%    | 1.000 | 6          | 73.6%    | 1.000 | 9            | 81.9%    | 1.000 |                                                 |          |       |                                                                       |       |        |                |        |       |             |        |        |  |
| FN1303 | 7                | 35.4%    | 1.000 | 5          | 23.4%    | 1.000 | 8          | 45.3%    | 1.000 | 9            | 41.7%    | 1.000 | AAL95499.1  hypothetical cytosolic protein      |          |       |                                                                       |       |        |                |        |       |             |        |        |  |
|        | 7                | 35.4%    | 1.000 | 8          | 47.9%    | 1.000 | 9          | 50.0%    | 1.000 | 9            | 41.7%    | 1.000 |                                                 |          |       |                                                                       |       |        |                |        |       |             |        |        |  |
| FN1304 | 17               | 76.0%    | 1.000 | 10         | 38.3%    | 1.000 | 12         | 55.8%    | 1.000 | 16           | 75.3%    | 1.000 | AAL95500.1  Single-strand DNA binding protein   |          |       |                                                                       |       |        |                |        |       |             |        |        |  |
|        | 16               | 68.8%    | 1.000 | 11         | 44.8%    | 1.000 | 14         | 76.0%    | 1.000 | 14           | 75.3%    | 1.000 |                                                 |          |       |                                                                       |       |        |                |        |       |             |        |        |  |
| FN1305 | 3                | 46.8%    | 1.000 | 4          | 40.5%    | 1.000 | 6          | 57.7%    | 1.000 | 3            | 40.5%    | 1.000 | AAL95501.1  Hypothetical cytosolic protein      |          |       |                                                                       |       |        |                |        |       |             |        |        |  |
|        | 5                | 46.8%    | 1.000 | 8          | 73.0%    | 1.000 | 5          | 50.5%    | 1.000 | 3            | 40.5%    | 1.000 |                                                 |          |       |                                                                       |       |        |                |        |       |             |        |        |  |
| FN1306 | 24               | 41.9%    | 1.000 | 2          | 4.8%     | 0.476 | 34         | 47.2%    | 1.000 | 11           | 22.8%    | 1.000 | AAL95502.1  Methyltransferase                   |          |       |                                                                       |       |        |                |        |       |             |        |        |  |
|        | 23               | 36.9%    | 1.000 | 29         | 44.3%    | 1.000 | 32         | 46.8%    | 1.000 | 12           | 20.3%    | 1.000 |                                                 |          |       |                                                                       |       |        |                |        |       |             |        |        |  |
| FN1309 | 11               | 100.0%   | 1.000 | 10         | 100.0%   | 1.000 | 6          | 100.0%   | 1.000 | 9            | 100.0%   | 1.000 | AAL95505.1  Hypothetical protein                |          |       |                                                                       |       |        |                |        |       |             |        |        |  |
|        | 11               | 100.0%   | 1.000 | 5          | 100.0%   | 1.000 | 6          | 100.0%   | 1.000 | 10           | 100.0%   | 1.000 |                                                 |          |       |                                                                       |       |        |                |        |       |             |        |        |  |
| FN1311 | 2                | 29.0%    | 0.999 | 0          | 0.0%     | 0.000 | 2          | 11.0%    | 0.991 | 0            | 0.0%     | 0.000 | AAL95507.1  Biopolymer transport exbD protein   |          |       |                                                                       |       |        |                |        |       |             |        |        |  |
|        | 3                | 48.0%    | 1.000 | 1          | 11.0%    | 0.983 | 2          | 11.0%    | 1.000 | 1            | 11.0%    | 0.982 |                                                 |          |       |                                                                       |       |        |                |        |       |             |        |        |  |
| FN1312 | 7                | 26.2%    | 1.000 | 0          | 0.0%     | 0.000 | 2          | 14.4%    | 1.000 | 2            | 14.9%    | 0.943 | AAL95508.1  Biopolymer transport exbB protein   |          |       |                                                                       |       |        |                |        |       |             |        |        |  |
|        | 6                | 26.2%    | 1.000 | 2          | 11.9%    | 0.999 | 2          | 11.9%    | 0.996 | 2            | 11.9%    | 0.957 |                                                 |          |       |                                                                       |       |        |                |        |       |             |        |        |  |

Show detected proteins only  
 Show all proteins  
 Filter by category:

Proteins found:  
1424

Enter (or paste) list of ORFs

Find ORFs

[Dot Plots](#) [Dot Plots](#)





|        |    | Fn Summary Table |          |       | FnPg vs Fn |          |       | FnSg vs Fn |          |       | FnPgSg vs Fn |          |       | FnPgSg vs FnPg                                                  |                                  |        | FnSg vs FnPg |        |       | FnPgSg vs FnSg |        |        | Fn Coverage |  |  |  |
|--------|----|------------------|----------|-------|------------|----------|-------|------------|----------|-------|--------------|----------|-------|-----------------------------------------------------------------|----------------------------------|--------|--------------|--------|-------|----------------|--------|--------|-------------|--|--|--|
| ORF    | Fn | Fn               |          |       | FnPg       |          |       | FnSg       |          |       | FnPgSg       |          |       | Description                                                     | Fn                               |        | FnPg         |        | FnSg  |                | FnPgSg |        |             |  |  |  |
|        |    | n                | coverage | prob  | n          | coverage | prob  | n          | coverage | prob  | n            | coverage | prob  |                                                                 | Rep I                            | Rep II | Rep I        | Rep II | Rep I | Rep II         | Rep I  | Rep II |             |  |  |  |
| FN1333 | 2  | 18.1%            | 1.000    | 0.975 | 1          | 10.1%    | 1.000 | 0.966      | 4        | 23.9% | 1.000        | 2        | 23.2% | 0.988                                                           | AAL95529.1  Hypothetical protein |        |              |        |       |                |        |        |             |  |  |  |
|        | 2  | 18.1%            | 1.000    | 0.999 | 2          | 12.3%    | 1.000 | 8          | 52.2%    | 1.000 | 2            | 12.3%    | 0.990 |                                                                 |                                  |        |              |        |       |                |        |        |             |  |  |  |
| FN1334 | 8  | 23.4%            | 1.000    | 1.000 | 4          | 9.2%     | 1.000 | 3          | 6.2%     | 0.993 | 6            | 15.7%    | 1.000 | AAL95530.1  N-acetylmuramoyl-L-alanine amidase                  |                                  |        |              |        |       |                |        |        |             |  |  |  |
|        | 6  | 13.0%            | 1.000    | 1.000 | 5          | 16.9%    | 1.000 | 4          | 13.6%    | 1.000 | 2            | 3.6%     | 1.000 |                                                                 |                                  |        |              |        |       |                |        |        |             |  |  |  |
| FN1335 | 7  | 55.3%            | 1.000    | 1.000 | 5          | 41.5%    | 1.000 | 7          | 54.3%    | 1.000 | 10           | 55.3%    | 1.000 | AAL95531.1  Protein translocase subunit YajC                    |                                  |        |              |        |       |                |        |        |             |  |  |  |
|        | 7  | 55.3%            | 1.000    | 1.000 | 7          | 55.3%    | 1.000 | 8          | 81.9%    | 1.000 | 8            | 55.3%    | 1.000 |                                                                 |                                  |        |              |        |       |                |        |        |             |  |  |  |
| FN1336 | 4  | 27.9%            | 1.000    | 1.000 | 5          | 31.1%    | 1.000 | 2          | 27.9%    | 1.000 | 2            | 10.7%    | 1.000 | AAL95532.1  Hypothetical protein                                |                                  |        |              |        |       |                |        |        |             |  |  |  |
|        | 5  | 37.7%            | 1.000    | 1.000 | 2          | 27.9%    | 0.994 | 4          | 28.7%    | 1.000 | 2            | 27.9%    | 0.989 |                                                                 |                                  |        |              |        |       |                |        |        |             |  |  |  |
| FN1337 | 5  | 18.1%            | 1.000    | 1.000 | 3          | 9.3%     | 1.000 | 0          | 0.0%     | 0.000 | 4            | 17.6%    | 1.000 | AAL95533.1  unknown                                             |                                  |        |              |        |       |                |        |        |             |  |  |  |
|        | 10 | 30.5%            | 1.000    | 1.000 | 3          | 13.1%    | 0.996 | 5          | 13.4%    | 1.000 | 2            | 12.3%    | 0.994 |                                                                 |                                  |        |              |        |       |                |        |        |             |  |  |  |
| FN1340 | 37 | 54.5%            | 1.000    | 1.000 | 37         | 51.9%    | 1.000 | 32         | 52.9%    | 1.000 | 31           | 54.8%    | 1.000 | AAL95536.1  Glutamyl-tRNA synthetase                            |                                  |        |              |        |       |                |        |        |             |  |  |  |
|        | 32 | 52.7%            | 1.000    | 1.000 | 32         | 54.8%    | 1.000 | 36         | 58.3%    | 1.000 | 35           | 58.9%    | 1.000 |                                                                 |                                  |        |              |        |       |                |        |        |             |  |  |  |
| FN1341 | 6  | 20.5%            | 1.000    | 1.000 | 1          | 8.8%     | 0.983 | 3          | 13.6%    | 1.000 | 7            | 26.0%    | 1.000 | AAL95537.1  Bacterial Peptide Chain Release Factor 2 (RF-2)     |                                  |        |              |        |       |                |        |        |             |  |  |  |
|        | 4  | 13.3%            | 1.000    | 1.000 | 5          | 13.6%    | 1.000 | 4          | 10.1%    | 1.000 | 6            | 23.7%    | 1.000 |                                                                 |                                  |        |              |        |       |                |        |        |             |  |  |  |
| FN1343 | 5  | 28.3%            | 1.000    | 1.000 | 1          | 9.3%     | 0.419 | 6          | 28.3%    | 1.000 | 0            | 0.0%     | 0.000 | AAL95539.1  seC-independent protein TATD                        |                                  |        |              |        |       |                |        |        |             |  |  |  |
|        | 2  | 7.8%             | 0.997    | 1.000 | 10         | 39.1%    | 1.000 | 6          | 28.3%    | 1.000 | 2            | 15.1%    | 0.988 |                                                                 |                                  |        |              |        |       |                |        |        |             |  |  |  |
| FN1345 | 2  | 12.0%            | 0.918    | 1.000 | 0          | 0.0%     | 0.000 | 1          | 5.8%     | 0.380 | 1            | 5.8%     | 0.562 | AAL95541.1  2-hydroxy-6-oxo-6-phenylhexa-2,4-dienoate hydrolase |                                  |        |              |        |       |                |        |        |             |  |  |  |
|        | 0  | 0.0%             | 0.000    | 1.000 | 0          | 0.0%     | 0.000 | 3          | 21.5%    | 1.000 | 1            | 5.8%     | 0.596 |                                                                 |                                  |        |              |        |       |                |        |        |             |  |  |  |
| FN1346 | 1  | 8.5%             | 0.933    | 1.000 | 0          | 0.0%     | 0.000 | 4          | 28.0%    | 1.000 | 0            | 0.0%     | 1.000 | AAL95542.1  Hypothetical cytosolic protein                      |                                  |        |              |        |       |                |        |        |             |  |  |  |
|        | 1  | 8.5%             | 0.510    | 1.000 | 3          | 19.0%    | 1.000 | 5          | 28.0%    | 1.000 | 0            | 0.0%     | 1.000 |                                                                 |                                  |        |              |        |       |                |        |        |             |  |  |  |
| FN1347 | 5  | 27.5%            | 1.000    | 1.000 | 4          | 25.2%    | 1.000 | 3          | 16.5%    | 0.980 | 4            | 26.1%    | 1.000 | AAL95543.1  Hypothetical cytosolic protein                      |                                  |        |              |        |       |                |        |        |             |  |  |  |
|        | 4  | 27.5%            | 1.000    | 1.000 | 5          | 30.3%    | 1.000 | 5          | 27.1%    | 1.000 | 4            | 26.1%    | 1.000 |                                                                 |                                  |        |              |        |       |                |        |        |             |  |  |  |
| FN1348 | 7  | 44.4%            | 1.000    | 1.000 | 3          | 13.5%    | 1.000 | 4          | 30.0%    | 1.000 | 7            | 44.4%    | 1.000 | AAL95544.1  ABC transporter ATP-binding protein                 |                                  |        |              |        |       |                |        |        |             |  |  |  |
|        | 5  | 26.9%            | 1.000    | 1.000 | 7          | 40.8%    | 1.000 | 9          | 43.5%    | 1.000 | 3            | 20.2%    | 0.999 |                                                                 |                                  |        |              |        |       |                |        |        |             |  |  |  |
| FN1349 | 4  | 9.2%             | 1.000    | 1.000 | 1          | 6.5%     | 0.371 | 3          | 8.0%     | 1.000 | 3            | 10.2%    | 0.999 | AAL95545.1  ABC transporter permease protein                    |                                  |        |              |        |       |                |        |        |             |  |  |  |
|        | 4  | 9.2%             | 1.000    | 1.000 | 3          | 9.7%     | 1.000 | 4          | 8.7%     | 1.000 | 2            | 6.5%     | 0.979 |                                                                 |                                  |        |              |        |       |                |        |        |             |  |  |  |
| FN1351 | 7  | 46.4%            | 1.000    | 1.000 | 5          | 46.4%    | 1.000 | 8          | 46.4%    | 1.000 | 5            | 37.1%    | 1.000 | AAL95547.1  15 kDa lipoprotein precursor                        |                                  |        |              |        |       |                |        |        |             |  |  |  |
|        | 6  | 37.1%            | 1.000    | 1.000 | 9          | 46.4%    | 1.000 | 9          | 46.4%    | 1.000 | 6            | 59.3%    | 1.000 |                                                                 |                                  |        |              |        |       |                |        |        |             |  |  |  |
| FN1352 | 13 | 61.6%            | 1.000    | 1.000 | 8          | 49.1%    | 1.000 | 11         | 55.4%    | 1.000 | 10           | 49.6%    | 1.000 | AAL95548.1  ABC transporter ATP-binding protein                 |                                  |        |              |        |       |                |        |        |             |  |  |  |
|        | 10 | 51.8%            | 1.000    | 1.000 | 14         | 61.6%    | 1.000 | 12         | 54.9%    | 1.000 | 10           | 46.0%    | 1.000 |                                                                 |                                  |        |              |        |       |                |        |        |             |  |  |  |
| FN1353 | 5  | 5.0%             | 1.000    | 1.000 | 2          | 11.2%    | 0.872 | 4          | 6.2%     | 1.000 | 7            | 15.8%    | 1.000 | AAL95549.1  ABC transporter permease protein                    |                                  |        |              |        |       |                |        |        |             |  |  |  |
|        | 4  | 8.8%             | 1.000    | 1.000 | 6          | 9.8%     | 1.000 | 7          | 20.5%    | 1.000 | 5            | 13.0%    | 1.000 |                                                                 |                                  |        |              |        |       |                |        |        |             |  |  |  |

Show detected proteins only  
 Show all proteins  
 Filter by category:

Proteins found:  
 1424

Enter (or paste) list of ORFs

|        |    | Fn Summary Table |          |      | FnPg vs Fn |          |      | FnSg vs Fn |          |      | FnPgSg vs Fn |          |                                                          | FnPgSg vs FnPg |       |        | FnSg vs FnPg |        |       | FnPgSg vs FnSg |        |        | Fn Coverage |  |
|--------|----|------------------|----------|------|------------|----------|------|------------|----------|------|--------------|----------|----------------------------------------------------------|----------------|-------|--------|--------------|--------|-------|----------------|--------|--------|-------------|--|
| ORF    | Fn | Fn               |          |      | FnPg       |          |      | FnSg       |          |      | FnPgSg       |          |                                                          | Description    | Fn    |        | FnPg         |        | FnSg  |                | FnPgSg |        |             |  |
|        |    | n                | coverage | prob | n          | coverage | prob | n          | coverage | prob | n            | coverage | prob                                                     |                | Rep I | Rep II | Rep I        | Rep II | Rep I | Rep II         | Rep I  | Rep II |             |  |
| FN1354 | 9  | 26.2%            | 1.000    | 2    | 8.2%       | 0.987    | 7    | 22.2%      | 1.000    | 11   | 25.7%        | 1.000    | AAL95550.1  ABC transporter permease protein             |                |       |        |              |        |       |                |        |        |             |  |
|        | 9  | 23.8%            | 1.000    | 11   | 26.4%      | 1.000    | 8    | 23.6%      | 1.000    | 9    | 34.1%        | 1.000    |                                                          |                |       |        |              |        |       |                |        |        |             |  |
| FN1355 | 3  | 15.1%            | 1.000    | 1    | 5.7%       | 0.456    | 2    | 11.7%      | 0.993    | 3    | 13.1%        | 0.948    | AAL95551.1  Integral membrane protein                    |                |       |        |              |        |       |                |        |        |             |  |
|        | 4  | 22.5%            | 1.000    | 2    | 8.4%       | 1.000    | 0    | 0.0%       | 0.000    | 2    | 8.4%         | 0.999    |                                                          |                |       |        |              |        |       |                |        |        |             |  |
| FN1358 | 2  | 11.2%            | 1.000    | 1    | 5.2%       | 0.984    | 4    | 15.9%      | 1.000    | 7    | 31.3%        | 1.000    | AAL95554.1  Hypothetical protein                         |                |       |        |              |        |       |                |        |        |             |  |
|        | 2  | 11.2%            | 1.000    | 6    | 42.5%      | 1.000    | 9    | 33.9%      | 1.000    | 8    | 23.6%        | 1.000    |                                                          |                |       |        |              |        |       |                |        |        |             |  |
| FN1359 | 20 | 39.0%            | 1.000    | 19   | 39.6%      | 1.000    | 41   | 62.4%      | 1.000    | 25   | 49.5%        | 1.000    | AAL95555.1  Dipeptide-binding protein                    |                |       |        |              |        |       |                |        |        |             |  |
|        | 17 | 34.1%            | 1.000    | 45   | 63.6%      | 1.000    | 40   | 62.2%      | 1.000    | 21   | 46.1%        | 1.000    |                                                          |                |       |        |              |        |       |                |        |        |             |  |
| FN1362 | 2  | 14.6%            | 0.996    | 7    | 30.0%      | 1.000    | 15   | 53.2%      | 1.000    | 0    | 0.0%         | 0.000    | AAL95558.1  Dipeptide transport ATP-binding protein dppD |                |       |        |              |        |       |                |        |        |             |  |
|        | 2  | 10.7%            | 0.719    | 16   | 44.6%      | 1.000    | 14   | 41.2%      | 1.000    | 2    | 12.9%        | 0.990    |                                                          |                |       |        |              |        |       |                |        |        |             |  |
| FN1363 | 4  | 24.4%            | 1.000    | 7    | 40.8%      | 1.000    | 13   | 62.4%      | 1.000    | 4    | 22.8%        | 1.000    | AAL95559.1  Dipeptide transport ATP-binding protein dppF |                |       |        |              |        |       |                |        |        |             |  |
|        | 4  | 27.2%            | 1.000    | 12   | 49.2%      | 1.000    | 14   | 62.4%      | 1.000    | 3    | 18.4%        | 0.993    |                                                          |                |       |        |              |        |       |                |        |        |             |  |
| FN1364 | 4  | 40.7%            | 1.000    | 5    | 27.1%      | 1.000    | 2    | 27.1%      | 0.992    | 5    | 40.7%        | 1.000    | AAL95560.1  LSU ribosomal protein L32P                   |                |       |        |              |        |       |                |        |        |             |  |
|        | 4  | 42.4%            | 1.000    | 2    | 25.4%      | 1.000    | 2    | 25.4%      | 1.000    | 4    | 40.7%        | 1.000    |                                                          |                |       |        |              |        |       |                |        |        |             |  |
| FN1365 | 21 | 61.8%            | 1.000    | 13   | 40.9%      | 1.000    | 21   | 63.5%      | 1.000    | 18   | 55.2%        | 1.000    | AAL95561.1  GTP-binding protein                          |                |       |        |              |        |       |                |        |        |             |  |
|        | 18 | 55.2%            | 1.000    | 21   | 62.4%      | 1.000    | 20   | 51.9%      | 1.000    | 20   | 57.7%        | 1.000    |                                                          |                |       |        |              |        |       |                |        |        |             |  |
| FN1366 | 21 | 62.5%            | 1.000    | 15   | 51.0%      | 1.000    | 18   | 68.5%      | 1.000    | 24   | 66.9%        | 1.000    | AAL95562.1  Triosephosphate isomerase                    |                |       |        |              |        |       |                |        |        |             |  |
|        | 23 | 71.3%            | 1.000    | 25   | 76.5%      | 1.000    | 16   | 63.7%      | 1.000    | 27   | 70.5%        | 1.000    |                                                          |                |       |        |              |        |       |                |        |        |             |  |
| FN1368 | 0  | 0.0%             |          | 0    | 0.0%       |          | 0    | 0.0%       | 0.000    | 1    | 4.4%         | 0.346    | AAL95564.1  COMF operon protein 3                        |                |       |        |              |        |       |                |        |        |             |  |
|        | 0  | 0.0%             |          | 0    | 0.0%       |          | 3    | 14.2%      | 0.935    | 2    | 9.8%         | 0.760    |                                                          |                |       |        |              |        |       |                |        |        |             |  |
| FN1371 | 1  | 7.0%             | 0.239    | 0    | 0.0%       | 0.000    | 1    | 7.0%       | 0.779    | 0    | 0.0%         | 0.000    | AAL95567.1  Ribonuclease HII                             |                |       |        |              |        |       |                |        |        |             |  |
|        | 1  | 4.7%             | 0.817    | 3    | 14.4%      | 0.985    | 3    | 18.1%      | 0.999    | 1    | 6.0%         | 0.601    |                                                          |                |       |        |              |        |       |                |        |        |             |  |
| FN1373 | 1  | 8.0%             | 0.675    | 1    | 8.0%       | 0.402    | 2    | 8.0%       | 0.997    | 2    | 15.4%        | 0.995    | AAL95569.1  regulatory protein                           |                |       |        |              |        |       |                |        |        |             |  |
|        | 0  | 0.0%             | 0.000    | 0    | 0.0%       | 0.000    | 3    | 13.0%      | 1.000    | 1    | 8.0%         | 0.310    |                                                          |                |       |        |              |        |       |                |        |        |             |  |
| FN1374 | 4  | 22.8%            | 1.000    | 2    | 15.7%      | 0.559    | 2    | 15.0%      | 0.997    | 4    | 19.5%        | 1.000    | AAL95570.1  Transcriptional regulator                    |                |       |        |              |        |       |                |        |        |             |  |
|        | 4  | 17.6%            | 1.000    | 3    | 13.5%      | 0.998    | 5    | 24.3%      | 1.000    | 2    | 15.0%        | 0.946    |                                                          |                |       |        |              |        |       |                |        |        |             |  |
| FN1375 | 4  | 10.4%            | 1.000    | 2    | 6.6%       | 0.990    | 6    | 19.4%      | 1.000    | 5    | 10.1%        | 1.000    | AAL95571.1  Citrate-sodium symport                       |                |       |        |              |        |       |                |        |        |             |  |
|        | 6  | 12.3%            | 1.000    | 8    | 25.8%      | 1.000    | 8    | 31.1%      | 1.000    | 5    | 10.4%        | 1.000    |                                                          |                |       |        |              |        |       |                |        |        |             |  |
| FN1376 | 37 | 65.6%            | 1.000    | 29   | 57.6%      | 1.000    | 33   | 79.2%      | 1.000    | 36   | 73.7%        | 1.000    | AAL95572.1  Oxaloacetate decarboxylase alpha chain       |                |       |        |              |        |       |                |        |        |             |  |
|        | 35 | 67.2%            | 1.000    | 34   | 81.2%      | 1.000    | 35   | 78.1%      | 1.000    | 31   | 62.7%        | 1.000    |                                                          |                |       |        |              |        |       |                |        |        |             |  |
| FN1377 | 0  | 0.0%             |          | 0    | 0.0%       | 0.000    | 3    | 9.7%       | 0.994    | 2    | 5.7%         | 0.609    | AAL95573.1  CITG protein                                 |                |       |        |              |        |       |                |        |        |             |  |
|        | 0  | 0.0%             |          | 2    | 5.7%       | 0.980    | 2    | 9.0%       | 0.948    | 1    | 4.7%         | 0.978    |                                                          |                |       |        |              |        |       |                |        |        |             |  |

Show detected proteins only  
 Show all proteins  
 Filter by category:

Proteins found:  
 1424

Enter (or paste) list of ORFs

| ORF    | Fn Summary Table |          |       | FnPg vs Fn |          |       | FnSg vs Fn |          |       | FnPgSg vs Fn |          |       | FnPgSg vs FnPg                                             |          |      | FnSg vs FnPg |       |        | FnPgSg vs FnSg |        |       | Fn Coverage |        |        |  |
|--------|------------------|----------|-------|------------|----------|-------|------------|----------|-------|--------------|----------|-------|------------------------------------------------------------|----------|------|--------------|-------|--------|----------------|--------|-------|-------------|--------|--------|--|
|        | Fn               |          |       | FnPg       |          |       | FnSg       |          |       | FnPgSg       |          |       | Description                                                |          |      |              | Fn    |        | FnPg           |        | FnSg  |             | FnPgSg |        |  |
|        | n                | coverage | prob  | n          | coverage | prob  | n          | coverage | prob  | n            | coverage | prob  | n                                                          | coverage | prob | Description  | Rep I | Rep II | Rep I          | Rep II | Rep I | Rep II      | Rep I  | Rep II |  |
| FN1378 | 4                | 42.6%    | 1.000 | 3          | 22.3%    | 1.000 | 3          | 31.9%    | 1.000 | 5            | 31.9%    | 1.000 | AAL95574.1  Citrate lyase acyl carrier protein             |          |      |              |       |        |                |        |       |             |        |        |  |
|        | 4                | 36.2%    | 1.000 | 7          | 46.8%    | 1.000 | 2          | 22.3%    | 1.000 | 5            | 31.9%    | 1.000 |                                                            |          |      |              |       |        |                |        |       |             |        |        |  |
| FN1379 | 21               | 43.9%    | 1.000 | 10         | 33.8%    | 1.000 | 19         | 58.8%    | 1.000 | 16           | 43.9%    | 1.000 | AAL95575.1  Citrate lyase beta chain                       |          |      |              |       |        |                |        |       |             |        |        |  |
|        | 19               | 46.3%    | 1.000 | 22         | 66.2%    | 1.000 | 20         | 62.8%    | 1.000 | 17           | 56.4%    | 1.000 |                                                            |          |      |              |       |        |                |        |       |             |        |        |  |
| FN1380 | 32               | 54.8%    | 1.000 | 19         | 41.9%    | 1.000 | 32         | 63.4%    | 1.000 | 28           | 56.0%    | 1.000 | AAL95576.1  Citrate lyase beta chain                       |          |      |              |       |        |                |        |       |             |        |        |  |
|        | 29               | 47.5%    | 1.000 | 35         | 66.9%    | 1.000 | 30         | 61.2%    | 1.000 | 29           | 47.3%    | 1.000 |                                                            |          |      |              |       |        |                |        |       |             |        |        |  |
| FN1381 | 3                | 3.2%     | 1.000 | 0          | 0.0%     | 0.000 | 1          | 1.0%     | 0.364 | 2            | 1.8%     | 0.846 | AAL95577.1  unknown                                        |          |      |              |       |        |                |        |       |             |        |        |  |
|        | 3                | 3.1%     | 0.999 | 1          | 1.2%     | 0.276 | 1          | 1.0%     | 0.346 | 3            | 2.6%     | 0.770 |                                                            |          |      |              |       |        |                |        |       |             |        |        |  |
| FN1382 | 2                | 5.0%     | 0.993 | 1          | 2.2%     | 0.983 | 2          | 5.2%     | 1.000 | 2            | 5.2%     | 0.900 | AAL95578.1  ATPase                                         |          |      |              |       |        |                |        |       |             |        |        |  |
|        | 2                | 5.2%     | 0.998 | 6          | 12.7%    | 1.000 | 4          | 11.4%    | 1.000 | 1            | 3.0%     | 0.328 |                                                            |          |      |              |       |        |                |        |       |             |        |        |  |
| FN1383 | 1                | 0.9%     | 0.817 | 5          | 6.7%     | 1.000 | 9          | 9.4%     | 1.000 | 3            | 4.2%     | 0.834 | AAL95579.1  DNA polymerase III alpha subunit               |          |      |              |       |        |                |        |       |             |        |        |  |
|        | 2                | 3.1%     | 0.898 | 5          | 4.5%     | 1.000 | 9          | 7.9%     | 1.000 | 0            | 0.0%     | 0.000 |                                                            |          |      |              |       |        |                |        |       |             |        |        |  |
| FN1385 | 4                | 7.8%     | 1.000 | 0          | 0.0%     | 0.000 | 3          | 6.2%     | 0.992 | 2            | 5.0%     | 0.978 | AAL95581.1  Hypothetical protein                           |          |      |              |       |        |                |        |       |             |        |        |  |
|        | 5                | 10.2%    | 1.000 | 3          | 6.1%     | 1.000 | 6          | 12.6%    | 1.000 | 1            | 2.4%     | 0.459 |                                                            |          |      |              |       |        |                |        |       |             |        |        |  |
| FN1386 | 4                | 6.3%     | 0.997 | 2          | 3.6%     | 0.982 | 9          | 12.7%    | 1.000 | 9            | 11.2%    | 1.000 | AAL95582.1  SWF/SNF family helicase                        |          |      |              |       |        |                |        |       |             |        |        |  |
|        | 5                | 7.2%     | 1.000 | 9          | 13.2%    | 1.000 | 15         | 18.3%    | 1.000 | 6            | 8.2%     | 1.000 |                                                            |          |      |              |       |        |                |        |       |             |        |        |  |
| FN1391 | 14               | 79.8%    | 1.000 | 8          | 47.2%    | 1.000 | 12         | 79.8%    | 1.000 | 14           | 69.7%    | 1.000 | AAL95584.1  Acetyltransferase                              |          |      |              |       |        |                |        |       |             |        |        |  |
|        | 15               | 79.8%    | 1.000 | 12         | 68.5%    | 1.000 | 7          | 52.8%    | 1.000 | 15           | 69.7%    | 1.000 |                                                            |          |      |              |       |        |                |        |       |             |        |        |  |
| FN1392 | 8                | 47.1%    | 1.000 | 8          | 36.8%    | 1.000 | 6          | 47.1%    | 1.000 | 11           | 47.1%    | 1.000 | AAL95585.1  SSU ribosomal protein S16P                     |          |      |              |       |        |                |        |       |             |        |        |  |
|        | 8                | 47.1%    | 1.000 | 6          | 47.1%    | 1.000 | 6          | 47.1%    | 1.000 | 9            | 47.1%    | 1.000 |                                                            |          |      |              |       |        |                |        |       |             |        |        |  |
| FN1393 | 15               | 29.7%    | 1.000 | 4          | 8.8%     | 1.000 | 14         | 25.2%    | 1.000 | 11           | 24.8%    | 1.000 | AAL95586.1  Signal recognition particle, subunit FFH/SRP54 |          |      |              |       |        |                |        |       |             |        |        |  |
|        | 19               | 29.5%    | 1.000 | 12         | 23.2%    | 1.000 | 14         | 25.7%    | 1.000 | 10           | 19.8%    | 1.000 |                                                            |          |      |              |       |        |                |        |       |             |        |        |  |
| FN1397 | 17               | 54.3%    | 1.000 | 7          | 23.0%    | 1.000 | 13         | 47.4%    | 1.000 | 19           | 47.0%    | 1.000 | AAL95590.1  Glutaminase                                    |          |      |              |       |        |                |        |       |             |        |        |  |
|        | 21               | 57.9%    | 1.000 | 16         | 50.3%    | 1.000 | 15         | 51.0%    | 1.000 | 16           | 47.0%    | 1.000 |                                                            |          |      |              |       |        |                |        |       |             |        |        |  |
| FN1398 | 15               | 17.7%    | 1.000 | 4          | 11.1%    | 1.000 | 8          | 16.6%    | 1.000 | 13           | 19.6%    | 1.000 | AAL95591.1  Amino acid carrier protein alstT               |          |      |              |       |        |                |        |       |             |        |        |  |
|        | 12               | 19.1%    | 1.000 | 9          | 18.7%    | 1.000 | 8          | 16.6%    | 1.000 | 15           | 21.3%    | 1.000 |                                                            |          |      |              |       |        |                |        |       |             |        |        |  |
| FN1399 | 0                | 0.0%     | 0.000 | 1          | 3.5%     | 0.408 | 2          | 6.6%     | 0.629 | 0            | 0.0%     |       | AAL95592.1  Hypothetical cytosolic protein                 |          |      |              |       |        |                |        |       |             |        |        |  |
|        | 1                | 3.5%     | 0.289 | 1          | 4.7%     | 0.274 | 3          | 12.6%    | 0.959 | 0            | 0.0%     |       |                                                            |          |      |              |       |        |                |        |       |             |        |        |  |
| FN1400 | 0                | 0.0%     | 0.000 | 3          | 4.5%     | 0.978 | 2          | 2.3%     | 0.990 | 1            | 1.3%     | 0.616 | AAL95593.1  serine/threonine kinase                        |          |      |              |       |        |                |        |       |             |        |        |  |
|        | 1                | 0.9%     | 0.357 | 3          | 3.3%     | 0.985 | 2          | 2.4%     | 0.988 | 4            | 4.9%     | 0.994 |                                                            |          |      |              |       |        |                |        |       |             |        |        |  |
| FN1406 | 11               | 26.0%    | 1.000 | 5          | 12.7%    | 1.000 | 11         | 37.8%    | 1.000 | 12           | 26.0%    | 1.000 | AAL95599.1  Histidine ammonia-lyase                        |          |      |              |       |        |                |        |       |             |        |        |  |
|        | 13               | 37.2%    | 1.000 | 22         | 49.3%    | 1.000 | 16         | 36.2%    | 1.000 | 12           | 24.7%    | 1.000 |                                                            |          |      |              |       |        |                |        |       |             |        |        |  |

Show detected proteins only  
 Show all proteins  
 Filter by category:

Proteins found:  
 1424

Enter (or paste) list of ORFs

| ORF    | Fn Summary Table |          |       | FnPg vs Fn |          |       | FnSg vs Fn |          |       | FnPgSg vs Fn |          |       | FnPgSg vs FnPg                                                           |          |      | FnSg vs FnPg |       |        | FnPgSg vs FnSg |        |       | Fn Coverage |        |        |  |
|--------|------------------|----------|-------|------------|----------|-------|------------|----------|-------|--------------|----------|-------|--------------------------------------------------------------------------|----------|------|--------------|-------|--------|----------------|--------|-------|-------------|--------|--------|--|
|        | Fn               |          |       | FnPg       |          |       | FnSg       |          |       | FnPgSg       |          |       | Description                                                              |          |      |              | Fn    |        | FnPg           |        | FnSg  |             | FnPgSg |        |  |
|        | n                | coverage | prob  | n          | coverage | prob  | n          | coverage | prob  | n            | coverage | prob  | n                                                                        | coverage | prob | Description  | Rep I | Rep II | Rep I          | Rep II | Rep I | Rep II      | Rep I  | Rep II |  |
| FN1407 | 5                | 25.6%    | 1.000 | 2          | 9.6%     | 0.989 | 8          | 34.5%    | 1.000 | 4            | 16.4%    | 1.000 | AAL95600.1  Glutamate formiminotransferase                               |          |      |              |       |        |                |        |       |             |        |        |  |
|        | 5                | 25.6%    | 1.000 | 12         | 51.2%    | 1.000 | 9          | 44.4%    | 1.000 | 4            | 13.0%    | 1.000 |                                                                          |          |      |              |       |        |                |        |       |             |        |        |  |
| FN1411 | 17               | 34.9%    | 1.000 | 22         | 44.1%    | 1.000 | 29         | 55.9%    | 1.000 | 18           | 31.2%    | 1.000 | AAL95604.1  Threonine dehydratase                                        |          |      |              |       |        |                |        |       |             |        |        |  |
|        | 17               | 34.7%    | 1.000 | 35         | 60.1%    | 1.000 | 30         | 58.7%    | 1.000 | 19           | 34.4%    | 1.000 |                                                                          |          |      |              |       |        |                |        |       |             |        |        |  |
| FN1412 | 1                | 1.8%     | 0.482 | 6          | 17.2%    | 1.000 | 3          | 9.1%     | 1.000 | 2            | 7.0%     | 0.992 | AAL95605.1  5-methylthioribose kinase                                    |          |      |              |       |        |                |        |       |             |        |        |  |
|        | 0                | 0.0%     | 0.000 | 2          | 6.8%     | 0.992 | 4          | 9.4%     | 1.000 | 2            | 3.9%     | 0.823 |                                                                          |          |      |              |       |        |                |        |       |             |        |        |  |
| FN1413 | 1                | 8.3%     | 0.981 | 4          | 22.1%    | 1.000 | 0          | 0.0%     | 0.000 | 3            | 12.9%    | 0.989 | AAL95606.1  Translation initiation factor EIF-2B subunit 1               |          |      |              |       |        |                |        |       |             |        |        |  |
|        | 1                | 8.3%     | 0.982 | 2          | 8.6%     | 0.986 | 4          | 11.5%    | 1.000 | 1            | 3.2%     | 0.981 |                                                                          |          |      |              |       |        |                |        |       |             |        |        |  |
| FN1415 | 1                | 4.4%     | 0.721 | 4          | 18.2%    | 1.000 | 1          | 2.1%     | 0.880 | 2            | 3.9%     | 0.862 | AAL95608.1  NADH-dependent butanol dehydrogenase A                       |          |      |              |       |        |                |        |       |             |        |        |  |
|        | 0                | 0.0%     | 0.000 | 6          | 17.9%    | 1.000 | 6          | 17.7%    | 1.000 | 1            | 2.1%     | 0.985 |                                                                          |          |      |              |       |        |                |        |       |             |        |        |  |
| FN1416 | 1                | 4.2%     | 0.350 | 2          | 7.5%     | 0.715 | 1          | 5.0%     | 0.725 | 4            | 12.3%    | 0.991 | AAL95609.1  Transcriptional regulator, GntR family                       |          |      |              |       |        |                |        |       |             |        |        |  |
|        | 0                | 0.0%     | 0.000 | 3          | 7.9%     | 0.924 | 4          | 14.0%    | 1.000 | 3            | 9.4%     | 0.997 |                                                                          |          |      |              |       |        |                |        |       |             |        |        |  |
| FN1417 | 2                | 12.6%    | 0.999 | 5          | 18.0%    | 1.000 | 5          | 23.9%    | 1.000 | 3            | 12.2%    | 0.998 | AAL95610.1  L-fuculose phosphate aldolase                                |          |      |              |       |        |                |        |       |             |        |        |  |
|        | 3                | 17.6%    | 1.000 | 7          | 37.8%    | 1.000 | 3          | 19.8%    | 1.000 | 2            | 11.7%    | 0.978 |                                                                          |          |      |              |       |        |                |        |       |             |        |        |  |
| FN1418 | 1                | 3.2%     | 0.446 | 3          | 10.7%    | 0.999 | 3          | 3.6%     | 0.905 | 2            | 5.1%     | 0.850 | AAL95611.1  Transcriptional regulator, GntR family                       |          |      |              |       |        |                |        |       |             |        |        |  |
|        | 4                | 8.6%     | 0.999 | 2          | 6.5%     | 0.751 | 3          | 7.4%     | 0.889 | 2            | 4.8%     | 0.990 |                                                                          |          |      |              |       |        |                |        |       |             |        |        |  |
| FN1419 | 32               | 76.7%    | 1.000 | 54         | 86.8%    | 1.000 | 42         | 89.4%    | 1.000 | 45           | 85.8%    | 1.000 | AAL95612.1  Methionine gamma-lyase                                       |          |      |              |       |        |                |        |       |             |        |        |  |
|        | 32               | 77.5%    | 1.000 | 43         | 89.4%    | 1.000 | 40         | 87.1%    | 1.000 | 42           | 83.3%    | 1.000 |                                                                          |          |      |              |       |        |                |        |       |             |        |        |  |
| FN1420 | 1                | 1.8%     | 0.953 | 6          | 15.1%    | 1.000 | 2          | 5.6%     | 0.997 | 3            | 4.7%     | 0.999 | AAL95613.1  NA+/H+ antiporter NHAC                                       |          |      |              |       |        |                |        |       |             |        |        |  |
|        | 1                | 1.8%     | 0.967 | 4          | 5.8%     | 1.000 | 2          | 4.7%     | 0.990 | 2            | 4.7%     | 1.000 |                                                                          |          |      |              |       |        |                |        |       |             |        |        |  |
| FN1421 | 67               | 48.2%    | 1.000 | 107        | 65.0%    | 1.000 | 82         | 56.5%    | 1.000 | 86           | 59.6%    | 1.000 | AAL95614.1  Pyruvate-flavodoxin oxidoreductase                           |          |      |              |       |        |                |        |       |             |        |        |  |
|        | 68               | 49.0%    | 1.000 | 98         | 69.1%    | 1.000 | 91         | 65.2%    | 1.000 | 81           | 59.3%    | 1.000 |                                                                          |          |      |              |       |        |                |        |       |             |        |        |  |
| FN1423 | 21               | 48.9%    | 1.000 | 12         | 32.6%    | 1.000 | 29         | 60.0%    | 1.000 | 27           | 62.2%    | 1.000 | AAL95616.1  Flavoprotein                                                 |          |      |              |       |        |                |        |       |             |        |        |  |
|        | 23               | 45.9%    | 1.000 | 27         | 51.9%    | 1.000 | 31         | 60.7%    | 1.000 | 28           | 51.6%    | 1.000 |                                                                          |          |      |              |       |        |                |        |       |             |        |        |  |
| FN1424 | 35               | 60.1%    | 1.000 | 14         | 36.6%    | 1.000 | 34         | 64.0%    | 1.000 | 38           | 67.3%    | 1.000 | AAL95617.1  ACYL-COA dehydrogenase, short-chain specific                 |          |      |              |       |        |                |        |       |             |        |        |  |
|        | 36               | 64.0%    | 1.000 | 31         | 60.8%    | 1.000 | 41         | 65.1%    | 1.000 | 34           | 66.0%    | 1.000 |                                                                          |          |      |              |       |        |                |        |       |             |        |        |  |
| FN1426 | 48               | 49.4%    | 1.000 | 9          | 15.4%    | 1.000 | 39         | 44.4%    | 1.000 | 31           | 40.6%    | 1.000 | AAL95619.1  Serine protease                                              |          |      |              |       |        |                |        |       |             |        |        |  |
|        | 49               | 48.9%    | 1.000 | 44         | 46.3%    | 1.000 | 48         | 46.0%    | 1.000 | 30           | 40.6%    | 1.000 |                                                                          |          |      |              |       |        |                |        |       |             |        |        |  |
| FN1427 | 2                | 14.3%    | 0.987 | 1          | 4.4%     | 0.387 | 2          | 9.2%     | 0.989 | 3            | 18.1%    | 1.000 | AAL95620.1  Phenazine biosynthesis protein phzF                          |          |      |              |       |        |                |        |       |             |        |        |  |
|        | 2                | 14.3%    | 0.999 | 5          | 24.2%    | 1.000 | 2          | 8.2%     | 0.994 | 3            | 18.1%    | 0.997 |                                                                          |          |      |              |       |        |                |        |       |             |        |        |  |
| FN1429 | 3                | 15.8%    | 0.999 | 2          | 10.8%    | 0.879 | 1          | 3.8%     | 0.340 | 2            | 14.2%    | 0.997 | AAL95622.1  Branched-chain amino acid transport ATP-binding protein livG |          |      |              |       |        |                |        |       |             |        |        |  |
|        | 1                | 10.4%    | 0.922 | 0          | 0.0%     | 0.000 | 0          | 0.0%     | 0.000 | 0            | 0.0%     | 0.000 |                                                                          |          |      |              |       |        |                |        |       |             |        |        |  |

Show detected proteins only  
 Show all proteins  
 Filter by category:

Proteins found:  
 1424

Enter (or paste) list of ORFs

| ORF    | Fn Summary Table |          |       | FnPg vs Fn |          |       | FnSg vs Fn |          |       | FnPgSg vs Fn |          |       | FnPgSg vs FnPg                                                                      |          |      | FnSg vs FnPg |       |        | FnPgSg vs FnSg |        |       | Fn Coverage |        |        |  |
|--------|------------------|----------|-------|------------|----------|-------|------------|----------|-------|--------------|----------|-------|-------------------------------------------------------------------------------------|----------|------|--------------|-------|--------|----------------|--------|-------|-------------|--------|--------|--|
|        | Fn               |          |       | FnPg       |          |       | FnSg       |          |       | FnPgSg       |          |       | Description                                                                         |          |      |              | Fn    |        | FnPg           |        | FnSg  |             | FnPgSg |        |  |
|        | n                | coverage | prob  | n          | coverage | prob  | n          | coverage | prob  | n            | coverage | prob  | n                                                                                   | coverage | prob | Description  | Rep I | Rep II | Rep I          | Rep II | Rep I | Rep II      | Rep I  | Rep II |  |
| FN1432 | 14               | 48.0%    | 1.000 | 2          | 7.6%     | 0.744 | 2          | 9.4%     | 1.000 | 9            | 32.4%    | 1.000 | AAL95625.1  Leucine-, isoleucine-, valine-, threonine-, and alanine-binding protein |          |      |              |       |        |                |        |       |             |        |        |  |
|        | 12               | 46.7%    | 1.000 | 2          | 8.9%     | 0.996 | 4          | 20.6%    | 1.000 | 10           | 34.5%    | 1.000 |                                                                                     |          |      |              |       |        |                |        |       |             |        |        |  |
| FN1433 | 19               | 63.8%    | 1.000 | 20         | 66.9%    | 1.000 | 20         | 63.8%    | 1.000 | 23           | 75.8%    | 1.000 | AAL95626.1  Short chain dehydrogenase                                               |          |      |              |       |        |                |        |       |             |        |        |  |
|        | 22               | 73.8%    | 1.000 | 22         | 66.5%    | 1.000 | 23         | 73.1%    | 1.000 | 21           | 75.8%    | 1.000 |                                                                                     |          |      |              |       |        |                |        |       |             |        |        |  |
| FN1434 | 31               | 43.4%    | 1.000 | 19         | 25.3%    | 1.000 | 32         | 51.1%    | 1.000 | 26           | 39.0%    | 1.000 | AAL95627.1  Tetratricopeptide repeat family protein                                 |          |      |              |       |        |                |        |       |             |        |        |  |
|        | 27               | 38.1%    | 1.000 | 30         | 43.2%    | 1.000 | 30         | 40.3%    | 1.000 | 25           | 36.8%    | 1.000 |                                                                                     |          |      |              |       |        |                |        |       |             |        |        |  |
| FN1437 | 8                | 67.1%    | 1.000 | 6          | 45.9%    | 1.000 | 4          | 45.9%    | 1.000 | 9            | 67.1%    | 1.000 | AAL95630.1  LSU ribosomal protein L28P                                              |          |      |              |       |        |                |        |       |             |        |        |  |
|        | 8                | 56.5%    | 1.000 | 6          | 67.1%    | 1.000 | 7          | 56.5%    | 1.000 | 8            | 67.1%    | 1.000 |                                                                                     |          |      |              |       |        |                |        |       |             |        |        |  |
| FN1439 | 12               | 39.6%    | 1.000 | 1          | 4.5%     | 0.525 | 4          | 18.4%    | 1.000 | 10           | 35.9%    | 1.000 | AAL95632.1  Transcriptional regulator, DeoR family                                  |          |      |              |       |        |                |        |       |             |        |        |  |
|        | 13               | 40.0%    | 1.000 | 7          | 32.2%    | 1.000 | 5          | 19.2%    | 1.000 | 8            | 27.8%    | 1.000 |                                                                                     |          |      |              |       |        |                |        |       |             |        |        |  |
| FN1440 | 19               | 39.5%    | 1.000 | 8          | 18.8%    | 1.000 | 6          | 17.8%    | 1.000 | 17           | 44.6%    | 1.000 | AAL95633.1  1-phosphofructokinase                                                   |          |      |              |       |        |                |        |       |             |        |        |  |
|        | 17               | 36.3%    | 1.000 | 15         | 36.6%    | 1.000 | 10         | 24.5%    | 1.000 | 12           | 37.6%    | 1.000 |                                                                                     |          |      |              |       |        |                |        |       |             |        |        |  |
| FN1441 | 24               | 25.6%    | 1.000 | 9          | 16.1%    | 1.000 | 17         | 28.0%    | 1.000 | 22           | 26.1%    | 1.000 | AAL95634.1  PTS system, fructose-specific IIBC component                            |          |      |              |       |        |                |        |       |             |        |        |  |
|        | 22               | 25.6%    | 1.000 | 18         | 28.0%    | 1.000 | 17         | 24.4%    | 1.000 | 20           | 25.1%    | 1.000 |                                                                                     |          |      |              |       |        |                |        |       |             |        |        |  |
| FN1444 | 36               | 68.0%    | 1.000 | 29         | 54.7%    | 1.000 | 33         | 63.9%    | 1.000 | 35           | 64.3%    | 1.000 | AAL95637.1  GMP synthase (glutamine-hydrolyzing)                                    |          |      |              |       |        |                |        |       |             |        |        |  |
|        | 34               | 69.3%    | 1.000 | 39         | 67.6%    | 1.000 | 41         | 69.1%    | 1.000 | 29           | 63.3%    | 1.000 |                                                                                     |          |      |              |       |        |                |        |       |             |        |        |  |
| FN1445 | 13               | 19.9%    | 1.000 | 8          | 13.5%    | 1.000 | 8          | 16.8%    | 1.000 | 13           | 18.7%    | 1.000 | AAL95638.1  DNA helicase                                                            |          |      |              |       |        |                |        |       |             |        |        |  |
|        | 16               | 23.3%    | 1.000 | 7          | 11.0%    | 1.000 | 7          | 13.8%    | 1.000 | 10           | 17.6%    | 1.000 |                                                                                     |          |      |              |       |        |                |        |       |             |        |        |  |
| FN1448 | 1                | 3.8%     | 0.242 | 2          | 6.2%     | 0.979 | 0          | 0.0%     | 0.000 | 0            | 0.0%     | 0.000 | AAL95641.1  Hypothetical cytosolic protein                                          |          |      |              |       |        |                |        |       |             |        |        |  |
|        | 1                | 2.1%     | 0.254 | 1          | 4.1%     | 0.326 | 3          | 10.3%    | 0.998 | 1            | 4.1%     | 0.312 |                                                                                     |          |      |              |       |        |                |        |       |             |        |        |  |
| FN1449 | 84               | 32.2%    | 1.000 | 20         | 10.7%    | 1.000 | 14         | 8.4%     | 1.000 | 50           | 24.4%    | 1.000 | AAL95642.1  Fusobacterium outer membrane protein family                             |          |      |              |       |        |                |        |       |             |        |        |  |
|        | 79               | 36.5%    | 1.000 | 25         | 13.5%    | 1.000 | 15         | 9.0%     | 1.000 | 64           | 27.9%    | 1.000 |                                                                                     |          |      |              |       |        |                |        |       |             |        |        |  |
| FN1450 | 4                | 9.6%     | 1.000 | 2          | 3.0%     | 1.000 | 6          | 13.2%    | 1.000 | 5            | 12.0%    | 1.000 | AAL95643.1  Integral membrane protein                                               |          |      |              |       |        |                |        |       |             |        |        |  |
|        | 4                | 9.6%     | 1.000 | 5          | 7.7%     | 1.000 | 1          | 3.0%     | 0.985 | 4            | 9.6%     | 1.000 |                                                                                     |          |      |              |       |        |                |        |       |             |        |        |  |
| FN1451 | 20               | 57.5%    | 1.000 | 16         | 48.1%    | 1.000 | 30         | 73.9%    | 1.000 | 19           | 53.3%    | 1.000 | AAL95644.1  Cell division protein ftsZ                                              |          |      |              |       |        |                |        |       |             |        |        |  |
|        | 22               | 58.9%    | 1.000 | 27         | 73.1%    | 1.000 | 30         | 69.4%    | 1.000 | 17           | 39.2%    | 1.000 |                                                                                     |          |      |              |       |        |                |        |       |             |        |        |  |
| FN1452 | 18               | 38.0%    | 1.000 | 8          | 25.1%    | 1.000 | 16         | 39.8%    | 1.000 | 15           | 35.3%    | 1.000 | AAL95645.1  Cell division protein ftsA                                              |          |      |              |       |        |                |        |       |             |        |        |  |
|        | 14               | 35.1%    | 1.000 | 18         | 46.3%    | 1.000 | 19         | 38.0%    | 1.000 | 16           | 33.1%    | 1.000 |                                                                                     |          |      |              |       |        |                |        |       |             |        |        |  |
| FN1454 | 9                | 38.3%    | 1.000 | 1          | 9.4%     | 0.984 | 4          | 22.0%    | 1.000 | 9            | 40.4%    | 1.000 | AAL95647.1  D-alanine--D-alanine ligase                                             |          |      |              |       |        |                |        |       |             |        |        |  |
|        | 7                | 33.4%    | 1.000 | 10         | 35.2%    | 1.000 | 12         | 45.6%    | 1.000 | 9            | 39.0%    | 1.000 |                                                                                     |          |      |              |       |        |                |        |       |             |        |        |  |
| FN1455 | 5                | 16.4%    | 1.000 | 7          | 13.9%    | 1.000 | 6          | 17.4%    | 1.000 | 3            | 7.5%     | 1.000 | AAL95648.1  UDP-N-acetylenolpyruvoylglucosamine reductase                           |          |      |              |       |        |                |        |       |             |        |        |  |
|        | 6                | 16.4%    | 1.000 | 7          | 27.4%    | 1.000 | 7          | 23.8%    | 1.000 | 8            | 25.3%    | 1.000 |                                                                                     |          |      |              |       |        |                |        |       |             |        |        |  |

Show detected proteins only  
 Show all proteins  
 Filter by category:

Proteins found:  
 1424

Enter (or paste) list of ORFs



| ORF    | Fn Summary Table |          |       | FnPg vs Fn |          |       | FnSg vs Fn |          |       | FnPgSg vs Fn |          |       | FnPgSg vs FnPg                                                   |          |      | FnSg vs FnPg |       |        | FnPgSg vs FnSg |        |       | Fn Coverage |        |        |  |
|--------|------------------|----------|-------|------------|----------|-------|------------|----------|-------|--------------|----------|-------|------------------------------------------------------------------|----------|------|--------------|-------|--------|----------------|--------|-------|-------------|--------|--------|--|
|        | Fn               |          |       | FnPg       |          |       | FnSg       |          |       | FnPgSg       |          |       | Description                                                      |          |      |              | Fn    |        | FnPg           |        | FnSg  |             | FnPgSg |        |  |
|        | n                | coverage | prob  | n          | coverage | prob  | n          | coverage | prob  | n            | coverage | prob  | n                                                                | coverage | prob | Description  | Rep I | Rep II | Rep I          | Rep II | Rep I | Rep II      | Rep I  | Rep II |  |
| FN1456 | 16               | 34.0%    | 1.000 | 14         | 26.1%    | 1.000 | 15         | 32.5%    | 1.000 | 13           | 30.1%    | 1.000 | AAL95649.1  UDP-N-acetylmuramate--alanine ligase                 |          |      |              |       |        |                |        |       |             |        |        |  |
|        | 16               | 36.3%    | 1.000 | 20         | 49.4%    | 1.000 | 20         | 42.3%    | 1.000 | 16           | 30.3%    | 1.000 |                                                                  |          |      |              |       |        |                |        |       |             |        |        |  |
| FN1457 | 9                | 30.0%    | 1.000 | 4          | 19.3%    | 1.000 | 16         | 41.7%    | 1.000 | 10           | 30.3%    | 1.000 | AAL95650.1  UDP-N-acetylglucosamine-N-acetylmuramyl-Pentapeptide |          |      |              |       |        |                |        |       |             |        |        |  |
|        | 10               | 34.2%    | 1.000 | 14         | 40.9%    | 1.000 | 12         | 34.7%    | 1.000 | 8            | 26.6%    | 1.000 |                                                                  |          |      |              |       |        |                |        |       |             |        |        |  |
| FN1458 | 18               | 41.4%    | 1.000 | 16         | 30.2%    | 1.000 | 16         | 38.3%    | 1.000 | 22           | 43.8%    | 1.000 | AAL95651.1  UDP-N-acetylmuramoylalanine--D-glutamate ligase      |          |      |              |       |        |                |        |       |             |        |        |  |
|        | 17               | 35.7%    | 1.000 | 13         | 34.4%    | 1.000 | 19         | 43.4%    | 1.000 | 14           | 33.5%    | 1.000 |                                                                  |          |      |              |       |        |                |        |       |             |        |        |  |
| FN1459 | 2                | 4.4%     | 1.000 | 1          | 4.4%     | 0.984 | 2          | 12.5%    | 0.989 | 0            | 0.0%     | 0.000 | AAL95652.1  Phospho-N-acetylmuramoyl-pentapeptide-transferase    |          |      |              |       |        |                |        |       |             |        |        |  |
|        | 3                | 9.1%     | 1.000 | 1          | 1.9%     | 0.451 | 2          | 9.1%     | 0.988 | 1            | 4.7%     | 0.737 |                                                                  |          |      |              |       |        |                |        |       |             |        |        |  |
| FN1461 | 14               | 27.2%    | 1.000 | 7          | 18.8%    | 1.000 | 5          | 11.9%    | 1.000 | 9            | 19.2%    | 1.000 | AAL95654.1  Histidinol-phosphatase                               |          |      |              |       |        |                |        |       |             |        |        |  |
|        | 16               | 29.0%    | 1.000 | 9          | 22.5%    | 1.000 | 13         | 27.7%    | 1.000 | 7            | 16.0%    | 1.000 |                                                                  |          |      |              |       |        |                |        |       |             |        |        |  |
| FN1462 | 1                | 2.1%     | 0.580 | 0          | 0.0%     | 0.000 | 3          | 14.5%    | 0.712 | 0            | 0.0%     |       | AAL95655.1  Transcriptional regulator, GntR family               |          |      |              |       |        |                |        |       |             |        |        |  |
|        | 2                | 6.4%     | 0.508 | 2          | 8.7%     | 0.534 | 1          | 3.4%     | 0.572 | 0            | 0.0%     |       |                                                                  |          |      |              |       |        |                |        |       |             |        |        |  |
| FN1463 | 25               | 60.7%    | 1.000 | 19         | 51.1%    | 1.000 | 22         | 54.3%    | 1.000 | 21           | 55.0%    | 1.000 | AAL95656.1  pyridoxine biosynthesis protein                      |          |      |              |       |        |                |        |       |             |        |        |  |
|        | 24               | 60.7%    | 1.000 | 20         | 57.5%    | 1.000 | 22         | 57.9%    | 1.000 | 23           | 55.0%    | 1.000 |                                                                  |          |      |              |       |        |                |        |       |             |        |        |  |
| FN1464 | 31               | 43.6%    | 1.000 | 19         | 31.6%    | 1.000 | 34         | 54.7%    | 1.000 | 27           | 45.1%    | 1.000 | AAL95657.1  1-deoxyxylulose-5-phosphate synthase                 |          |      |              |       |        |                |        |       |             |        |        |  |
|        | 30               | 39.6%    | 1.000 | 37         | 55.1%    | 1.000 | 36         | 60.9%    | 1.000 | 27           | 41.3%    | 1.000 |                                                                  |          |      |              |       |        |                |        |       |             |        |        |  |
| FN1470 | 20               | 54.3%    | 1.000 | 6          | 34.1%    | 1.000 | 3          | 12.1%    | 0.931 | 20           | 51.3%    | 1.000 | AAL95663.1  Hypothetical protein                                 |          |      |              |       |        |                |        |       |             |        |        |  |
|        | 17               | 44.4%    | 1.000 | 6          | 18.5%    | 1.000 | 6          | 19.9%    | 1.000 | 17           | 52.2%    | 1.000 |                                                                  |          |      |              |       |        |                |        |       |             |        |        |  |
| FN1471 | 3                | 8.7%     | 1.000 | 1          | 7.8%     | 0.513 | 3          | 11.4%    | 0.717 | 3            | 8.7%     | 0.992 | AAL95664.1  LACI-family transcription regulator                  |          |      |              |       |        |                |        |       |             |        |        |  |
|        | 5                | 16.8%    | 1.000 | 1          | 2.7%     | 0.298 | 3          | 9.9%     | 0.993 | 0            | 0.0%     | 0.000 |                                                                  |          |      |              |       |        |                |        |       |             |        |        |  |
| FN1472 | 24               | 57.2%    | 1.000 | 4          | 20.5%    | 1.000 | 8          | 33.6%    | 1.000 | 17           | 45.3%    | 1.000 | AAL95665.1  N-acetylneuraminate-binding protein                  |          |      |              |       |        |                |        |       |             |        |        |  |
|        | 21               | 56.9%    | 1.000 | 14         | 39.1%    | 1.000 | 7          | 33.6%    | 1.000 | 20           | 48.0%    | 1.000 |                                                                  |          |      |              |       |        |                |        |       |             |        |        |  |
| FN1474 | 3                | 15.1%    | 1.000 | 0          | 0.0%     | 0.000 | 0          | 0.0%     | 0.000 | 1            | 6.5%     | 0.969 | AAL95667.1  N-acetylmannosamine kinase                           |          |      |              |       |        |                |        |       |             |        |        |  |
|        | 3                | 18.6%    | 1.000 | 2          | 10.0%    | 0.694 | 1          | 5.2%     | 0.360 | 0            | 0.0%     | 0.000 |                                                                  |          |      |              |       |        |                |        |       |             |        |        |  |
| FN1475 | 6                | 30.3%    | 1.000 | 3          | 12.8%    | 1.000 | 2          | 9.0%     | 0.782 | 9            | 44.8%    | 1.000 | AAL95668.1  N-acetylneuraminate lyase                            |          |      |              |       |        |                |        |       |             |        |        |  |
|        | 8                | 48.6%    | 1.000 | 3          | 16.6%    | 1.000 | 3          | 16.6%    | 1.000 | 9            | 43.4%    | 1.000 |                                                                  |          |      |              |       |        |                |        |       |             |        |        |  |
| FN1476 | 6                | 34.8%    | 1.000 | 1          | 9.4%     | 0.975 | 1          | 5.4%     | 0.616 | 5            | 30.4%    | 1.000 | AAL95669.1  N-acetylmannosamine-6-phosphate 2-epimerase          |          |      |              |       |        |                |        |       |             |        |        |  |
|        | 7                | 55.4%    | 1.000 | 1          | 5.4%     | 0.255 | 0          | 0.0%     | 0.000 | 6            | 46.0%    | 1.000 |                                                                  |          |      |              |       |        |                |        |       |             |        |        |  |
| FN1478 | 1                | 21.6%    | 0.981 | 0          | 0.0%     | 0.000 | 3          | 23.4%    | 1.000 | 2            | 21.6%    | 1.000 | AAL95671.1  Hypothetical protein                                 |          |      |              |       |        |                |        |       |             |        |        |  |
|        | 2                | 23.4%    | 0.999 | 3          | 23.4%    | 1.000 | 2          | 23.4%    | 1.000 | 3            | 23.4%    | 1.000 |                                                                  |          |      |              |       |        |                |        |       |             |        |        |  |
| FN1479 | 5                | 19.1%    | 1.000 | 5          | 18.1%    | 1.000 | 4          | 17.6%    | 1.000 | 8            | 40.4%    | 1.000 | AAL95672.1  Hypothetical protein                                 |          |      |              |       |        |                |        |       |             |        |        |  |
|        | 6                | 23.9%    | 1.000 | 8          | 41.0%    | 1.000 | 7          | 31.9%    | 1.000 | 6            | 33.0%    | 1.000 |                                                                  |          |      |              |       |        |                |        |       |             |        |        |  |

Show detected proteins only  
 Show all proteins  
 Filter by category:

Proteins found:  
 1424

Enter (or paste) list of ORFs

| ORF           | Fn Summary Table |          |       | FnPg vs Fn |          |       | FnSg vs Fn |          |       | FnPgSg vs Fn |          |       | FnPgSg vs FnPg                                                        |          |      | FnSg vs FnPg |       |        | FnPgSg vs FnSg |        |       | Fn Coverage |        |        |  |
|---------------|------------------|----------|-------|------------|----------|-------|------------|----------|-------|--------------|----------|-------|-----------------------------------------------------------------------|----------|------|--------------|-------|--------|----------------|--------|-------|-------------|--------|--------|--|
|               | Fn               |          |       | FnPg       |          |       | FnSg       |          |       | FnPgSg       |          |       | Description                                                           |          |      |              | Fn    |        | FnPg           |        | FnSg  |             | FnPgSg |        |  |
|               | n                | coverage | prob  | n          | coverage | prob  | n          | coverage | prob  | n            | coverage | prob  | n                                                                     | coverage | prob | Description  | Rep I | Rep II | Rep I          | Rep II | Rep I | Rep II      | Rep I  | Rep II |  |
| <b>FN1480</b> | 6                | 19.8%    | 1.000 | 3          | 9.8%     | 1.000 | 11         | 26.7%    | 1.000 | 5            | 12.9%    | 1.000 | AAL95673.1  MG2+ transporter MGTE                                     |          |      |              |       |        |                |        |       |             |        |        |  |
|               | 5                | 16.7%    | 1.000 | 11         | 22.9%    | 1.000 | 14         | 32.7%    | 1.000 | 3            | 9.8%     | 0.996 |                                                                       |          |      |              |       |        |                |        |       |             |        |        |  |
| <b>FN1481</b> | 4                | 16.1%    | 1.000 | 4          | 18.8%    | 1.000 | 3          | 11.5%    | 1.000 | 3            | 9.7%     | 0.882 | AAL95674.1  Queuine tRNA-ribosyltransferase                           |          |      |              |       |        |                |        |       |             |        |        |  |
|               | 3                | 16.1%    | 0.995 | 5          | 27.9%    | 1.000 | 5          | 21.4%    | 1.000 | 1            | 7.0%     | 0.512 |                                                                       |          |      |              |       |        |                |        |       |             |        |        |  |
| <b>FN1482</b> | 21               | 30.2%    | 1.000 | 11         | 16.3%    | 1.000 | 25         | 39.0%    | 1.000 | 9            | 13.7%    | 1.000 | AAL95675.1  Guanosine-3',5'-bis (Diphosphate) 3'-pyrophosphohydrolase |          |      |              |       |        |                |        |       |             |        |        |  |
|               | 19               | 23.6%    | 1.000 | 27         | 36.0%    | 1.000 | 35         | 47.9%    | 1.000 | 11           | 14.2%    | 1.000 |                                                                       |          |      |              |       |        |                |        |       |             |        |        |  |
| <b>FN1483</b> | 6                | 32.9%    | 1.000 | 6          | 38.2%    | 1.000 | 7          | 58.2%    | 1.000 | 10           | 51.8%    | 1.000 | AAL95676.1  Adenine phosphoribosyltransferase                         |          |      |              |       |        |                |        |       |             |        |        |  |
|               | 5                | 32.9%    | 1.000 | 8          | 48.2%    | 1.000 | 8          | 49.4%    | 1.000 | 8            | 51.8%    | 1.000 |                                                                       |          |      |              |       |        |                |        |       |             |        |        |  |
| <b>FN1484</b> | 5                | 22.4%    | 1.000 | 1          | 4.9%     | 0.981 | 3          | 11.8%    | 1.000 | 3            | 15.1%    | 1.000 | AAL95677.1  Tetratricopeptide repeat family protein                   |          |      |              |       |        |                |        |       |             |        |        |  |
|               | 7                | 26.9%    | 1.000 | 2          | 8.2%     | 0.996 | 3          | 13.5%    | 0.999 | 3            | 11.8%    | 1.000 |                                                                       |          |      |              |       |        |                |        |       |             |        |        |  |
| <b>FN1485</b> | 0                | 0.0%     |       | 2          | 18.8%    | 0.985 | 1          | 6.7%     | 0.952 | 2            | 9.9%     | 0.750 | AAL95678.1  Transporter                                               |          |      |              |       |        |                |        |       |             |        |        |  |
|               | 0                | 0.0%     |       | 1          | 5.8%     | 0.950 | 3          | 22.9%    | 1.000 | 1            | 6.7%     | 0.418 |                                                                       |          |      |              |       |        |                |        |       |             |        |        |  |
| <b>FN1486</b> | 3                | 7.3%     | 1.000 | 1          | 3.8%     | 0.615 | 1          | 3.8%     | 0.817 | 5            | 16.9%    | 1.000 | AAL95679.1  magnesium and cobalt efflux protein CorC                  |          |      |              |       |        |                |        |       |             |        |        |  |
|               | 5                | 17.4%    | 1.000 | 1          | 1.6%     | 0.822 | 5          | 12.7%    | 1.000 | 3            | 11.0%    | 0.965 |                                                                       |          |      |              |       |        |                |        |       |             |        |        |  |
| <b>FN1487</b> | 18               | 56.2%    | 1.000 | 10         | 43.1%    | 1.000 | 16         | 51.0%    | 1.000 | 14           | 53.6%    | 1.000 | AAL95681.1  Chorismate mutase                                         |          |      |              |       |        |                |        |       |             |        |        |  |
|               | 18               | 56.2%    | 1.000 | 18         | 62.7%    | 1.000 | 13         | 52.9%    | 1.000 | 11           | 53.6%    | 1.000 |                                                                       |          |      |              |       |        |                |        |       |             |        |        |  |
| <b>FN1488</b> | 1                | 9.9%     | 0.981 | 3          | 31.1%    | 1.000 | 2          | 18.7%    | 0.994 | 4            | 32.2%    | 1.000 | AAL95682.1  Methylenetetrahydrofolate dehydrogenase (NADP+)           |          |      |              |       |        |                |        |       |             |        |        |  |
|               | 1                | 9.9%     | 0.982 | 3          | 27.2%    | 1.000 | 3          | 23.0%    | 1.000 | 5            | 40.3%    | 1.000 |                                                                       |          |      |              |       |        |                |        |       |             |        |        |  |
| <b>FN1489</b> | 12               | 25.6%    | 1.000 | 6          | 21.8%    | 1.000 | 10         | 34.7%    | 1.000 | 4            | 14.2%    | 1.000 | AAL95683.1  Methionyl-tRNA formyltransferase                          |          |      |              |       |        |                |        |       |             |        |        |  |
|               | 12               | 32.5%    | 1.000 | 12         | 40.1%    | 1.000 | 11         | 31.2%    | 1.000 | 8            | 20.8%    | 1.000 |                                                                       |          |      |              |       |        |                |        |       |             |        |        |  |
| <b>FN1490</b> | 4                | 30.9%    | 1.000 | 3          | 15.4%    | 1.000 | 8          | 51.7%    | 1.000 | 3            | 23.5%    | 1.000 | AAL95684.1  putative regulatory protein                               |          |      |              |       |        |                |        |       |             |        |        |  |
|               | 4                | 22.1%    | 1.000 | 7          | 51.7%    | 1.000 | 6          | 35.6%    | 1.000 | 2            | 13.4%    | 0.993 |                                                                       |          |      |              |       |        |                |        |       |             |        |        |  |
| <b>FN1491</b> | 2                | 17.3%    | 0.999 | 2          | 13.0%    | 0.997 | 3          | 22.2%    | 1.000 | 2            | 12.3%    | 0.997 | AAL95685.1  PTS system, IIA component                                 |          |      |              |       |        |                |        |       |             |        |        |  |
|               | 3                | 22.2%    | 1.000 | 3          | 22.2%    | 1.000 | 3          | 22.2%    | 1.000 | 2            | 13.6%    | 0.989 |                                                                       |          |      |              |       |        |                |        |       |             |        |        |  |
| <b>FN1492</b> | 1                | 6.0%     | 0.507 | 0          | 0.0%     |       | 0          | 0.0%     | 0.000 | 1            | 3.0%     | 0.341 | AAL95686.1  DNA repair protein recO                                   |          |      |              |       |        |                |        |       |             |        |        |  |
|               | 0                | 0.0%     | 0.000 | 0          | 0.0%     |       | 4          | 27.0%    | 0.952 | 0            | 0.0%     | 0.000 |                                                                       |          |      |              |       |        |                |        |       |             |        |        |  |
| <b>FN1493</b> | 7                | 26.0%    | 1.000 | 4          | 21.4%    | 0.999 | 3          | 20.8%    | 1.000 | 2            | 10.9%    | 0.996 | AAL95687.1  Hypothetical protein                                      |          |      |              |       |        |                |        |       |             |        |        |  |
|               | 6                | 26.0%    | 1.000 | 5          | 20.3%    | 1.000 | 3          | 10.9%    | 1.000 | 1            | 4.7%     | 0.985 |                                                                       |          |      |              |       |        |                |        |       |             |        |        |  |
| <b>FN1494</b> | 9                | 58.1%    | 0.000 | 0          | 0.0%     | 0.000 | 5          | 21.0%    | 0.000 | 7            | 52.4%    | 0.000 | AAL95680.1  Rod shape-determining protein mreC                        |          |      |              |       |        |                |        |       |             |        |        |  |
|               | 7                | 46.7%    | 0.000 | 6          | 41.0%    | 0.000 | 6          | 26.2%    | 0.000 | 5            | 35.2%    | 0.000 |                                                                       |          |      |              |       |        |                |        |       |             |        |        |  |
| <b>FN1496</b> | 9                | 58.1%    | 1.000 | 0          | 0.0%     | 0.000 | 5          | 21.0%    | 1.000 | 7            | 52.4%    | 1.000 | AAL95680.1  Rod shape-determining protein mreC                        |          |      |              |       |        |                |        |       |             |        |        |  |
|               | 7                | 46.7%    | 1.000 | 6          | 41.0%    | 1.000 | 6          | 26.2%    | 1.000 | 5            | 35.2%    | 1.000 |                                                                       |          |      |              |       |        |                |        |       |             |        |        |  |

Show detected proteins only  
 Show all proteins  
 Filter by category:

Proteins found:  
1424

Enter (or paste) list of ORFs

Find ORFs

Dot Plots Dot Plots

| ORF    | Fn Summary Table |          |       | FnPg vs Fn |          |       | FnSg vs Fn |          |       | FnPgSg vs Fn |          |       | FnPgSg vs FnPg                                                     |          |      | FnSg vs FnPg |       |        | FnPgSg vs FnSg |        |       | Fn Coverage |        |        |  |
|--------|------------------|----------|-------|------------|----------|-------|------------|----------|-------|--------------|----------|-------|--------------------------------------------------------------------|----------|------|--------------|-------|--------|----------------|--------|-------|-------------|--------|--------|--|
|        | Fn               |          |       | FnPg       |          |       | FnSg       |          |       | FnPgSg       |          |       | Description                                                        |          |      |              | Fn    |        | FnPg           |        | FnSg  |             | FnPgSg |        |  |
|        | n                | coverage | prob  | n          | coverage | prob  | n          | coverage | prob  | n            | coverage | prob  | n                                                                  | coverage | prob | Description  | Rep I | Rep II | Rep I          | Rep II | Rep I | Rep II      | Rep I  | Rep II |  |
| FN1499 | 11               | 25.3%    | 1.000 | 4          | 19.2%    | 1.000 | 7          | 21.3%    | 1.000 | 18           | 34.0%    | 1.000 | AAL93625.1   Cell surface protein                                  |          |      |              |       |        |                |        |       |             |        |        |  |
|        | 9                | 20.0%    | 1.000 | 20         | 44.1%    | 1.000 | 6          | 17.3%    | 1.000 | 22           | 36.7%    | 1.000 |                                                                    |          |      |              |       |        |                |        |       |             |        |        |  |
| FN1501 | 1                | 10.8%    | 0.399 | 2          | 10.8%    | 0.819 | 0          | 0.0%     | 0.000 | 0            | 0.0%     | 0.000 | AAL93627.1   Nickel transport ATP-binding protein nikD             |          |      |              |       |        |                |        |       |             |        |        |  |
|        | 1                | 5.4%     | 0.324 | 0          | 0.0%     | 0.000 | 1          | 6.2%     | 0.393 | 3            | 8.5%     | 0.897 |                                                                    |          |      |              |       |        |                |        |       |             |        |        |  |
| FN1504 | 30               | 46.6%    | 1.000 | 17         | 37.4%    | 1.000 | 26         | 60.7%    | 1.000 | 29           | 54.0%    | 1.000 | AAL93630.1   Nickel-binding protein                                |          |      |              |       |        |                |        |       |             |        |        |  |
|        | 26               | 46.4%    | 1.000 | 24         | 50.2%    | 1.000 | 25         | 51.9%    | 1.000 | 22           | 46.7%    | 1.000 |                                                                    |          |      |              |       |        |                |        |       |             |        |        |  |
| FN1505 | 14               | 78.3%    | 1.000 | 10         | 68.8%    | 1.000 | 15         | 74.5%    | 1.000 | 14           | 73.9%    | 1.000 | AAL93631.1   6,7-dimethyl-8-ribityllumazine synthase               |          |      |              |       |        |                |        |       |             |        |        |  |
|        | 13               | 73.9%    | 1.000 | 13         | 78.3%    | 1.000 | 13         | 73.9%    | 1.000 | 12           | 73.9%    | 1.000 |                                                                    |          |      |              |       |        |                |        |       |             |        |        |  |
| FN1506 | 5                | 18.7%    | 1.000 | 5          | 13.8%    | 1.000 | 1          | 3.8%     | 0.451 | 8            | 26.8%    | 1.000 | AAL93632.1   Diaminohydroxyphosphoribosylaminopyrimidine deaminase |          |      |              |       |        |                |        |       |             |        |        |  |
|        | 2                | 7.3%     | 0.805 | 4          | 17.6%    | 1.000 | 6          | 19.8%    | 1.000 | 6            | 16.0%    | 1.000 |                                                                    |          |      |              |       |        |                |        |       |             |        |        |  |
| FN1507 | 2                | 13.5%    | 0.990 | 1          | 6.0%     | 0.416 | 2          | 10.0%    | 0.801 | 1            | 5.6%     | 0.702 | AAL93633.1   Riboflavin synthase alpha chain                       |          |      |              |       |        |                |        |       |             |        |        |  |
|        | 1                | 6.0%     | 0.975 | 2          | 12.0%    | 0.985 | 4          | 23.1%    | 1.000 | 0            | 0.0%     | 0.000 |                                                                    |          |      |              |       |        |                |        |       |             |        |        |  |
| FN1508 | 17               | 45.1%    | 1.000 | 13         | 35.1%    | 1.000 | 18         | 51.1%    | 1.000 | 23           | 48.4%    | 1.000 | AAL93634.1   GTP cyclohydrolase II                                 |          |      |              |       |        |                |        |       |             |        |        |  |
|        | 16               | 47.1%    | 1.000 | 23         | 60.7%    | 1.000 | 22         | 57.4%    | 1.000 | 22           | 54.6%    | 1.000 |                                                                    |          |      |              |       |        |                |        |       |             |        |        |  |
| FN1512 | 7                | 16.7%    | 1.000 | 0          | 0.0%     | 0.000 | 0          | 0.0%     |       | 3            | 9.8%     | 1.000 | AAL93638.1   hypothetical exported 24-amino acid repeat protein    |          |      |              |       |        |                |        |       |             |        |        |  |
|        | 6                | 18.7%    | 1.000 | 1          | 3.0%     | 0.275 | 0          | 0.0%     |       | 3            | 9.1%     | 0.981 |                                                                    |          |      |              |       |        |                |        |       |             |        |        |  |
| FN1517 | 45               | 51.5%    | 1.000 | 19         | 25.1%    | 1.000 | 30         | 46.3%    | 1.000 | 40           | 47.5%    | 1.000 | AAL93643.1   Leucyl-tRNA synthetase                                |          |      |              |       |        |                |        |       |             |        |        |  |
|        | 43               | 50.4%    | 1.000 | 48         | 59.8%    | 1.000 | 38         | 53.4%    | 1.000 | 37           | 49.1%    | 1.000 |                                                                    |          |      |              |       |        |                |        |       |             |        |        |  |
| FN1518 | 4                | 25.5%    | 1.000 | 1          | 6.4%     | 0.896 | 1          | 4.4%     | 0.966 | 2            | 12.7%    | 0.999 | AAL93644.1   RNA polymerase sigma-H factor                         |          |      |              |       |        |                |        |       |             |        |        |  |
|        | 3                | 21.6%    | 1.000 | 1          | 4.4%     | 0.527 | 3          | 21.1%    | 1.000 | 1            | 3.9%     | 0.405 |                                                                    |          |      |              |       |        |                |        |       |             |        |        |  |
| FN1519 | 5                | 24.8%    | 1.000 | 2          | 6.0%     | 0.991 | 4          | 25.2%    | 1.000 | 5            | 24.4%    | 1.000 | AAL93645.1   23S rRNA methyltransferase                            |          |      |              |       |        |                |        |       |             |        |        |  |
|        | 4                | 24.4%    | 1.000 | 4          | 20.5%    | 1.000 | 5          | 24.8%    | 1.000 | 5            | 26.5%    | 1.000 |                                                                    |          |      |              |       |        |                |        |       |             |        |        |  |
| FN1520 | 14               | 43.7%    | 1.000 | 5          | 15.6%    | 1.000 | 10         | 34.0%    | 1.000 | 14           | 40.2%    | 1.000 | AAL93646.1   UDP-N-acetylglucosamine 1-carboxyvinyltransferase     |          |      |              |       |        |                |        |       |             |        |        |  |
|        | 17               | 44.9%    | 1.000 | 14         | 41.6%    | 1.000 | 12         | 36.2%    | 1.000 | 14           | 38.3%    | 1.000 |                                                                    |          |      |              |       |        |                |        |       |             |        |        |  |
| FN1521 | 6                | 13.8%    | 1.000 | 0          | 0.0%     | 0.000 | 0          | 0.0%     |       | 0            | 0.0%     | 0.000 | AAL93647.1   Dipeptide transport system permease protein dppB      |          |      |              |       |        |                |        |       |             |        |        |  |
|        | 6                | 13.8%    | 1.000 | 0          | 0.0%     | 0.000 | 0          | 0.0%     |       | 2            | 4.8%     | 0.992 |                                                                    |          |      |              |       |        |                |        |       |             |        |        |  |
| FN1523 | 34               | 47.3%    | 1.000 | 13         | 24.7%    | 1.000 | 21         | 38.6%    | 1.000 | 35           | 53.8%    | 1.000 | AAL93649.1   Dipeptide-binding protein                             |          |      |              |       |        |                |        |       |             |        |        |  |
|        | 34               | 47.3%    | 1.000 | 24         | 45.4%    | 1.000 | 24         | 45.6%    | 1.000 | 35           | 54.0%    | 1.000 |                                                                    |          |      |              |       |        |                |        |       |             |        |        |  |
| FN1524 | 3                | 11.1%    | 1.000 | 0          | 0.0%     |       | 0          | 0.0%     | 0.000 | 0            | 0.0%     |       | AAL93650.1   Dipeptide transport ATP-binding protein dppD          |          |      |              |       |        |                |        |       |             |        |        |  |
|        | 2                | 6.9%     | 0.988 | 0          | 0.0%     |       | 1          | 12.6%    | 0.386 | 0            | 0.0%     |       |                                                                    |          |      |              |       |        |                |        |       |             |        |        |  |
| FN1525 | 4                | 18.4%    | 1.000 | 2          | 7.9%     | 0.880 | 0          | 0.0%     |       | 1            | 3.2%     | 0.816 | AAL93651.1   Dipeptide transport ATP-binding protein dppF          |          |      |              |       |        |                |        |       |             |        |        |  |
|        | 2                | 6.7%     | 0.996 | 0          | 0.0%     | 0.000 | 0          | 0.0%     |       | 4            | 9.4%     | 1.000 |                                                                    |          |      |              |       |        |                |        |       |             |        |        |  |

Show detected proteins only  
 Show all proteins  
 Filter by category:

Proteins found:  
 1424

| ORF    | Fn Summary Table |          |       | FnPg vs Fn |          |       | FnSg vs Fn |          |       | FnPgSg vs Fn |          |       | FnPgSg vs FnPg                                                                  |          |      | FnSg vs FnPg |       |        | FnPgSg vs FnSg |        |       | Fn Coverage |        |        |  |
|--------|------------------|----------|-------|------------|----------|-------|------------|----------|-------|--------------|----------|-------|---------------------------------------------------------------------------------|----------|------|--------------|-------|--------|----------------|--------|-------|-------------|--------|--------|--|
|        | Fn               |          |       | FnPg       |          |       | FnSg       |          |       | FnPgSg       |          |       | Description                                                                     |          |      |              | Fn    |        | FnPg           |        | FnSg  |             | FnPgSg |        |  |
|        | n                | coverage | prob  | n          | coverage | prob  | n          | coverage | prob  | n            | coverage | prob  | n                                                                               | coverage | prob | Description  | Rep I | Rep II | Rep I          | Rep II | Rep I | Rep II      | Rep I  | Rep II |  |
| FN1526 | 107              | 52.0%    | 1.000 | 67         | 41.2%    | 1.000 | 65         | 34.3%    | 1.000 | 121          | 59.4%    | 1.000 | AAL93652.1  Fusobacterium outer membrane protein family                         |          |      |              |       |        |                |        |       |             |        |        |  |
|        | 101              | 50.5%    | 1.000 | 93         | 45.9%    | 1.000 | 74         | 43.0%    | 1.000 | 105          | 54.8%    | 1.000 |                                                                                 |          |      |              |       |        |                |        |       |             |        |        |  |
| FN1527 | 12               | 46.5%    | 1.000 | 6          | 39.5%    | 1.000 | 6          | 48.1%    | 1.000 | 13           | 65.1%    | 1.000 | AAL93653.1  Hypothetical protein                                                |          |      |              |       |        |                |        |       |             |        |        |  |
|        | 13               | 46.5%    | 1.000 | 10         | 48.1%    | 1.000 | 9          | 48.8%    | 1.000 | 12           | 45.7%    | 1.000 |                                                                                 |          |      |              |       |        |                |        |       |             |        |        |  |
| FN1528 | 21               | 67.8%    | 1.000 | 12         | 67.8%    | 1.000 | 7          | 34.7%    | 1.000 | 21           | 56.8%    | 1.000 | AAL93654.1  Hypothetical protein                                                |          |      |              |       |        |                |        |       |             |        |        |  |
|        | 21               | 67.8%    | 1.000 | 10         | 47.5%    | 1.000 | 11         | 50.0%    | 1.000 | 20           | 73.7%    | 1.000 |                                                                                 |          |      |              |       |        |                |        |       |             |        |        |  |
| FN1529 | 13               | 45.5%    | 1.000 | 5          | 32.5%    | 1.000 | 6          | 39.0%    | 1.000 | 11           | 39.0%    | 1.000 | AAL93655.1  Hypothetical protein                                                |          |      |              |       |        |                |        |       |             |        |        |  |
|        | 10               | 39.0%    | 1.000 | 7          | 43.1%    | 1.000 | 3          | 23.6%    | 1.000 | 11           | 39.0%    | 1.000 |                                                                                 |          |      |              |       |        |                |        |       |             |        |        |  |
| FN1531 | 3                | 11.5%    | 1.000 | 4          | 16.8%    | 1.000 | 4          | 23.0%    | 1.000 | 4            | 11.5%    | 1.000 | AAL93657.1  murein hydrolase export regulator                                   |          |      |              |       |        |                |        |       |             |        |        |  |
|        | 3                | 11.5%    | 0.998 | 5          | 17.6%    | 1.000 | 4          | 23.0%    | 1.000 | 3            | 11.5%    | 1.000 |                                                                                 |          |      |              |       |        |                |        |       |             |        |        |  |
| FN1533 | 25               | 59.8%    | 1.000 | 30         | 70.3%    | 1.000 | 19         | 59.8%    | 1.000 | 28           | 69.3%    | 1.000 | AAL93659.1  Electron transfer flavoprotein alpha-subunit                        |          |      |              |       |        |                |        |       |             |        |        |  |
|        | 24               | 59.8%    | 1.000 | 21         | 57.9%    | 1.000 | 20         | 59.8%    | 1.000 | 28           | 62.5%    | 1.000 |                                                                                 |          |      |              |       |        |                |        |       |             |        |        |  |
| FN1534 | 22               | 58.7%    | 1.000 | 24         | 72.6%    | 1.000 | 18         | 79.9%    | 1.000 | 20           | 62.9%    | 1.000 | AAL93660.1  Electron transfer flavoprotein beta-subunit                         |          |      |              |       |        |                |        |       |             |        |        |  |
|        | 22               | 58.7%    | 1.000 | 19         | 66.4%    | 1.000 | 17         | 75.7%    | 1.000 | 20           | 62.9%    | 1.000 |                                                                                 |          |      |              |       |        |                |        |       |             |        |        |  |
| FN1535 | 39               | 61.6%    | 1.000 | 36         | 63.5%    | 1.000 | 42         | 85.4%    | 1.000 | 43           | 62.7%    | 1.000 | AAL93661.1  Acyl-CoA dehydrogenase, short-chain specific                        |          |      |              |       |        |                |        |       |             |        |        |  |
|        | 43               | 63.0%    | 1.000 | 49         | 77.0%    | 1.000 | 40         | 70.6%    | 1.000 | 45           | 61.4%    | 1.000 |                                                                                 |          |      |              |       |        |                |        |       |             |        |        |  |
| FN1536 | 29               | 56.0%    | 1.000 | 34         | 55.8%    | 1.000 | 34         | 69.1%    | 1.000 | 29           | 60.0%    | 1.000 | AAL93662.1  (S)-2-hydroxy-acid oxidase chain D                                  |          |      |              |       |        |                |        |       |             |        |        |  |
|        | 30               | 54.5%    | 1.000 | 34         | 66.3%    | 1.000 | 31         | 67.4%    | 1.000 | 32           | 56.8%    | 1.000 |                                                                                 |          |      |              |       |        |                |        |       |             |        |        |  |
| FN1537 | 4                | 13.7%    | 1.000 | 4          | 10.6%    | 1.000 | 0          | 0.0%     | 0.000 | 2            | 9.3%     | 0.971 | AAL93663.1  Arsenical pump-driving ATPase                                       |          |      |              |       |        |                |        |       |             |        |        |  |
|        | 4                | 8.5%     | 1.000 | 1          | 3.1%     | 0.980 | 5          | 16.2%    | 1.000 | 2            | 6.7%     | 0.873 |                                                                                 |          |      |              |       |        |                |        |       |             |        |        |  |
| FN1538 | 6                | 22.2%    | 1.000 | 5          | 14.6%    | 1.000 | 10         | 34.3%    | 1.000 | 5            | 20.7%    | 1.000 | AAL93664.1  Arsenical pump-driving ATPase                                       |          |      |              |       |        |                |        |       |             |        |        |  |
|        | 9                | 29.0%    | 1.000 | 9          | 31.6%    | 1.000 | 9          | 30.1%    | 1.000 | 2            | 6.1%     | 0.999 |                                                                                 |          |      |              |       |        |                |        |       |             |        |        |  |
| FN1539 | 15               | 68.9%    | 1.000 | 18         | 77.0%    | 1.000 | 18         | 94.5%    | 1.000 | 16           | 80.3%    | 1.000 | AAL93665.1  Iron-sulfur cluster-binding protein                                 |          |      |              |       |        |                |        |       |             |        |        |  |
|        | 15               | 66.7%    | 1.000 | 17         | 90.7%    | 1.000 | 16         | 90.7%    | 1.000 | 18           | 80.3%    | 1.000 |                                                                                 |          |      |              |       |        |                |        |       |             |        |        |  |
| FN1540 | 36               | 44.8%    | 1.000 | 39         | 44.8%    | 1.000 | 45         | 53.7%    | 1.000 | 32           | 49.4%    | 1.000 | AAL93666.1  Iron-sulfur cluster-binding protein                                 |          |      |              |       |        |                |        |       |             |        |        |  |
|        | 34               | 38.4%    | 1.000 | 50         | 61.8%    | 1.000 | 50         | 60.5%    | 1.000 | 31           | 46.9%    | 1.000 |                                                                                 |          |      |              |       |        |                |        |       |             |        |        |  |
| FN1544 | 20               | 36.4%    | 1.000 | 26         | 51.5%    | 1.000 | 32         | 57.3%    | 1.000 | 26           | 68.2%    | 1.000 | AAL93670.1  Probable electron transfer flavoprotein-quinone oxidoreductase ydiS |          |      |              |       |        |                |        |       |             |        |        |  |
|        | 20               | 42.5%    | 1.000 | 33         | 54.1%    | 1.000 | 31         | 59.4%    | 1.000 | 20           | 53.4%    | 1.000 |                                                                                 |          |      |              |       |        |                |        |       |             |        |        |  |
| FN1545 | 6                | 70.2%    | 1.000 | 11         | 61.7%    | 1.000 | 8          | 70.2%    | 1.000 | 5            | 70.2%    | 1.000 | AAL93671.1  Ferredoxin like protein                                             |          |      |              |       |        |                |        |       |             |        |        |  |
|        | 6                | 70.2%    | 1.000 | 6          | 70.2%    | 1.000 | 5          | 58.5%    | 1.000 | 7            | 69.1%    | 1.000 |                                                                                 |          |      |              |       |        |                |        |       |             |        |        |  |
| FN1546 | 71               | 67.0%    | 1.000 | 66         | 58.1%    | 1.000 | 59         | 65.5%    | 1.000 | 79           | 67.0%    | 1.000 | AAL93672.1  Protein Translation Elongation Factor G (EF-G)                      |          |      |              |       |        |                |        |       |             |        |        |  |
|        | 72               | 67.4%    | 1.000 | 71         | 69.1%    | 1.000 | 63         | 66.7%    | 1.000 | 78           | 69.1%    | 1.000 |                                                                                 |          |      |              |       |        |                |        |       |             |        |        |  |

Show detected proteins only  
 Show all proteins  
 Filter by category:

Proteins found:  
 1424

Enter (or paste) list of ORFs

| ORF    | Fn Summary Table |          |       | FnPg vs Fn |          |       | FnSg vs Fn |          |       | FnPgSg vs Fn |          |       | FnPgSg vs FnPg                                                        |          |      | FnSg vs FnPg |       |        | FnPgSg vs FnSg |        |       | Fn Coverage |        |        |  |
|--------|------------------|----------|-------|------------|----------|-------|------------|----------|-------|--------------|----------|-------|-----------------------------------------------------------------------|----------|------|--------------|-------|--------|----------------|--------|-------|-------------|--------|--------|--|
|        | Fn               |          |       | FnPg       |          |       | FnSg       |          |       | FnPgSg       |          |       | Description                                                           |          |      |              | Fn    |        | FnPg           |        | FnSg  |             | FnPgSg |        |  |
|        | n                | coverage | prob  | n          | coverage | prob  | n          | coverage | prob  | n            | coverage | prob  | n                                                                     | coverage | prob | Description  | Rep I | Rep II | Rep I          | Rep II | Rep I | Rep II      | Rep I  | Rep II |  |
| FN1547 | 9                | 17.0%    | 1.000 | 11         | 21.1%    | 1.000 | 12         | 20.9%    | 1.000 | 14           | 23.3%    | 1.000 | AAL93673.1  PTS permease for N-acetylglucosamine and glucose          |          |      |              |       |        |                |        |       |             |        |        |  |
|        | 11               | 18.4%    | 1.000 | 13         | 24.7%    | 1.000 | 14         | 26.4%    | 1.000 | 11           | 19.4%    | 1.000 |                                                                       |          |      |              |       |        |                |        |       |             |        |        |  |
| FN1548 | 7                | 21.7%    | 1.000 | 3          | 29.0%    | 1.000 | 5          | 37.7%    | 1.000 | 6            | 17.4%    | 1.000 | AAL93674.1  Hypothetical protein                                      |          |      |              |       |        |                |        |       |             |        |        |  |
|        | 7                | 21.7%    | 1.000 | 5          | 34.1%    | 1.000 | 5          | 29.0%    | 1.000 | 6            | 17.4%    | 1.000 |                                                                       |          |      |              |       |        |                |        |       |             |        |        |  |
| FN1549 | 25               | 59.9%    | 1.000 | 21         | 56.1%    | 1.000 | 22         | 63.6%    | 1.000 | 24           | 60.9%    | 1.000 | AAL93675.1  Stomatin like protein                                     |          |      |              |       |        |                |        |       |             |        |        |  |
|        | 26               | 61.2%    | 1.000 | 25         | 71.1%    | 1.000 | 20         | 59.2%    | 1.000 | 21           | 53.4%    | 1.000 |                                                                       |          |      |              |       |        |                |        |       |             |        |        |  |
| FN1552 | 3                | 8.0%     | 1.000 | 0          | 0.0%     | 0.000 | 2          | 7.6%     | 0.990 | 0            | 0.0%     | 0.000 | AAL93678.1  abortive phage resistance protein                         |          |      |              |       |        |                |        |       |             |        |        |  |
|        | 5                | 13.7%    | 1.000 | 3          | 10.5%    | 0.999 | 3          | 11.5%    | 1.000 | 2            | 7.3%     | 0.996 |                                                                       |          |      |              |       |        |                |        |       |             |        |        |  |
| FN1553 | 6                | 11.9%    | 1.000 | 6          | 17.7%    | 1.000 | 5          | 15.8%    | 1.000 | 10           | 25.8%    | 1.000 | AAL93679.1  abortive phage resistance protein                         |          |      |              |       |        |                |        |       |             |        |        |  |
|        | 7                | 13.0%    | 1.000 | 4          | 6.5%     | 1.000 | 10         | 29.2%    | 1.000 | 3            | 6.9%     | 1.000 |                                                                       |          |      |              |       |        |                |        |       |             |        |        |  |
| FN1554 | 55               | 35.7%    | 1.000 | 26         | 17.6%    | 1.000 | 26         | 25.9%    | 1.000 | 42           | 32.9%    | 1.000 | AAL93680.1  Fusobacterium outer membrane protein family               |          |      |              |       |        |                |        |       |             |        |        |  |
|        | 54               | 37.9%    | 1.000 | 36         | 31.4%    | 1.000 | 32         | 30.5%    | 1.000 | 42           | 33.2%    | 1.000 |                                                                       |          |      |              |       |        |                |        |       |             |        |        |  |
| FN1555 | 53               | 86.8%    | 1.000 | 54         | 84.5%    | 1.000 | 45         | 83.5%    | 1.000 | 56           | 75.4%    | 1.000 | AAL93681.1  Protein Translation Elongation Factor Tu                  |          |      |              |       |        |                |        |       |             |        |        |  |
|        | 56               | 76.6%    | 1.000 | 50         | 88.8%    | 1.000 | 48         | 87.6%    | 1.000 | 56           | 76.6%    | 1.000 |                                                                       |          |      |              |       |        |                |        |       |             |        |        |  |
| FN1556 | 65               | 67.0%    | 1.000 | 51         | 64.5%    | 1.000 | 48         | 64.8%    | 1.000 | 79           | 73.7%    | 1.000 | AAL93682.1  Protein Translation Elongation Factor G (EF-G)            |          |      |              |       |        |                |        |       |             |        |        |  |
|        | 64               | 66.8%    | 1.000 | 58         | 68.5%    | 1.000 | 53         | 66.7%    | 1.000 | 76           | 75.2%    | 1.000 |                                                                       |          |      |              |       |        |                |        |       |             |        |        |  |
| FN1557 | 15               | 57.1%    | 1.000 | 15         | 57.1%    | 1.000 | 18         | 71.8%    | 1.000 | 27           | 62.8%    | 1.000 | AAL93683.1  SSU ribosomal protein S7P                                 |          |      |              |       |        |                |        |       |             |        |        |  |
|        | 16               | 57.1%    | 1.000 | 21         | 78.2%    | 1.000 | 15         | 67.3%    | 1.000 | 26           | 66.7%    | 1.000 |                                                                       |          |      |              |       |        |                |        |       |             |        |        |  |
| FN1558 | 2                | 22.1%    | 1.000 | 3          | 23.8%    | 1.000 | 2          | 31.1%    | 0.997 | 2            | 22.1%    | 1.000 | AAL93684.1  SSU ribosomal protein S12P                                |          |      |              |       |        |                |        |       |             |        |        |  |
|        | 2                | 22.1%    | 1.000 | 3          | 37.7%    | 1.000 | 2          | 31.1%    | 0.997 | 4            | 39.3%    | 1.000 |                                                                       |          |      |              |       |        |                |        |       |             |        |        |  |
| FN1560 | 12               | 58.7%    | 1.000 | 6          | 34.7%    | 1.000 | 16         | 67.1%    | 1.000 | 12           | 57.5%    | 1.000 | AAL93686.1  unknown                                                   |          |      |              |       |        |                |        |       |             |        |        |  |
|        | 16               | 60.5%    | 1.000 | 18         | 77.2%    | 1.000 | 17         | 76.0%    | 1.000 | 12           | 55.1%    | 1.000 |                                                                       |          |      |              |       |        |                |        |       |             |        |        |  |
| FN1562 | 5                | 12.3%    | 1.000 | 3          | 7.8%     | 1.000 | 6          | 25.4%    | 1.000 | 4            | 12.0%    | 1.000 | AAL93688.1  Phospho-2-dehydro-3-deoxyheptonate aldolase               |          |      |              |       |        |                |        |       |             |        |        |  |
|        | 5                | 16.8%    | 1.000 | 7          | 29.9%    | 1.000 | 7          | 34.1%    | 1.000 | 1            | 2.4%     | 0.629 |                                                                       |          |      |              |       |        |                |        |       |             |        |        |  |
| FN1576 | 0                | 0.0%     | 0.000 | 0          | 0.0%     | 0.000 | 3          | 19.7%    | 0.995 | 1            | 3.1%     | 0.503 | AAL93691.1  ATPases and helicase subunits involved in DNA replication |          |      |              |       |        |                |        |       |             |        |        |  |
|        | 1                | 5.5%     | 0.951 | 1          | 3.8%     | 0.335 | 1          | 7.6%     | 0.318 | 0            | 0.0%     | 0.000 |                                                                       |          |      |              |       |        |                |        |       |             |        |        |  |
| FN1577 | 19               | 51.2%    | 1.000 | 12         | 41.2%    | 1.000 | 25         | 69.0%    | 1.000 | 19           | 56.7%    | 1.000 | AAL93692.1  Rod shape-determining protein mreB                        |          |      |              |       |        |                |        |       |             |        |        |  |
|        | 18               | 52.0%    | 1.000 | 27         | 62.3%    | 1.000 | 24         | 61.4%    | 1.000 | 17           | 50.9%    | 1.000 |                                                                       |          |      |              |       |        |                |        |       |             |        |        |  |
| FN1579 | 21               | 39.1%    | 1.000 | 10         | 25.6%    | 1.000 | 20         | 44.0%    | 1.000 | 22           | 55.2%    | 1.000 | AAL93694.1  CysteinyI-tRNA synthetase                                 |          |      |              |       |        |                |        |       |             |        |        |  |
|        | 19               | 41.0%    | 1.000 | 22         | 47.1%    | 1.000 | 21         | 45.0%    | 1.000 | 20           | 39.1%    | 1.000 |                                                                       |          |      |              |       |        |                |        |       |             |        |        |  |
| FN1580 | 4                | 19.9%    | 0.998 | 0          | 0.0%     |       | 1          | 5.6%     | 0.408 | 1            | 3.9%     | 0.396 | AAL93695.1  2-C-methyl-D-erythritol 4-phosphate cytidyltransferase    |          |      |              |       |        |                |        |       |             |        |        |  |
|        | 2                | 8.2%     | 0.986 | 0          | 0.0%     |       | 3          | 18.2%    | 0.996 | 1            | 4.8%     | 0.469 |                                                                       |          |      |              |       |        |                |        |       |             |        |        |  |

Show detected proteins only  
 Show all proteins  
 Filter by category:

Proteins found:  
 1424

Enter (or paste) list of ORFs

| ORF    | Fn Summary Table |          |       | FnPg vs Fn |          |       | FnSg vs Fn |          |       | FnPgSg vs Fn |          |       | FnPgSg vs FnPg                                                   |          |      | FnSg vs FnPg |       |        | FnPgSg vs FnSg |        |       | Fn Coverage |        |        |  |
|--------|------------------|----------|-------|------------|----------|-------|------------|----------|-------|--------------|----------|-------|------------------------------------------------------------------|----------|------|--------------|-------|--------|----------------|--------|-------|-------------|--------|--------|--|
|        | Fn               |          |       | FnPg       |          |       | FnSg       |          |       | FnPgSg       |          |       | Description                                                      |          |      |              | Fn    |        | FnPg           |        | FnSg  |             | FnPgSg |        |  |
|        | n                | coverage | prob  | n          | coverage | prob  | n          | coverage | prob  | n            | coverage | prob  | n                                                                | coverage | prob | Description  | Rep I | Rep II | Rep I          | Rep II | Rep I | Rep II      | Rep I  | Rep II |  |
| FN1581 | 13               | 21.2%    | 1.000 | 9          | 18.3%    | 1.000 | 18         | 28.0%    | 1.000 | 13           | 19.9%    | 1.000 | AAL93696.1  DNA mismatch repair protein mutS                     |          |      |              |       |        |                |        |       |             |        |        |  |
|        | 13               | 22.1%    | 1.000 | 23         | 34.4%    | 1.000 | 25         | 38.9%    | 1.000 | 9            | 16.7%    | 1.000 |                                                                  |          |      |              |       |        |                |        |       |             |        |        |  |
| FN1582 | 1                | 2.4%     | 0.977 | 0          | 0.0%     | 0.000 | 5          | 11.2%    | 1.000 | 1            | 2.2%     | 0.445 | AAL93697.1  Hypothetical protein                                 |          |      |              |       |        |                |        |       |             |        |        |  |
|        | 3                | 9.6%     | 1.000 | 8          | 20.0%    | 1.000 | 6          | 12.9%    | 1.000 | 0            | 0.0%     | 0.000 |                                                                  |          |      |              |       |        |                |        |       |             |        |        |  |
| FN1586 | 0                | 0.0%     |       | 1          | 6.1%     | 0.754 | 4          | 8.3%     | 1.000 | 2            | 9.3%     | 0.998 | AAL93701.1  O-succinylbenzoate-CoA synthase                      |          |      |              |       |        |                |        |       |             |        |        |  |
|        | 0                | 0.0%     |       | 10         | 27.7%    | 1.000 | 5          | 15.7%    | 1.000 | 0            | 0.0%     | 0.000 |                                                                  |          |      |              |       |        |                |        |       |             |        |        |  |
| FN1589 | 10               | 38.4%    | 1.000 | 3          | 18.3%    | 1.000 | 9          | 45.2%    | 1.000 | 10           | 49.3%    | 1.000 | AAL93704.1  LexA repressor                                       |          |      |              |       |        |                |        |       |             |        |        |  |
|        | 10               | 48.9%    | 1.000 | 7          | 40.6%    | 1.000 | 11         | 66.2%    | 1.000 | 5            | 26.0%    | 1.000 |                                                                  |          |      |              |       |        |                |        |       |             |        |        |  |
| FN1590 | 0                | 0.0%     | 0.000 | 0          | 0.0%     | 0.000 | 3          | 43.0%    | 1.000 | 1            | 27.8%    | 0.807 | AAL93705.1  Hypothetical lipoprotein                             |          |      |              |       |        |                |        |       |             |        |        |  |
|        | 0                | 0.0%     | 0.000 | 4          | 40.1%    | 1.000 | 3          | 37.7%    | 1.000 | 1            | 18.1%    | 0.291 |                                                                  |          |      |              |       |        |                |        |       |             |        |        |  |
| FN1591 | 23               | 53.0%    | 1.000 | 17         | 44.4%    | 1.000 | 18         | 53.5%    | 1.000 | 28           | 56.9%    | 1.000 | AAL93706.1  RNFB-related protein                                 |          |      |              |       |        |                |        |       |             |        |        |  |
|        | 21               | 47.0%    | 1.000 | 15         | 46.2%    | 1.000 | 12         | 41.0%    | 1.000 | 28           | 56.9%    | 1.000 |                                                                  |          |      |              |       |        |                |        |       |             |        |        |  |
| FN1592 | 1                | 6.2%     | 0.981 | 0          | 0.0%     | 0.000 | 2          | 18.6%    | 0.933 | 1            | 6.2%     | 0.989 | AAL93707.1  Na(+)-translocating NADH-quinone reductase subunit D |          |      |              |       |        |                |        |       |             |        |        |  |
|        | 1                | 6.2%     | 0.982 | 4          | 25.8%    | 1.000 | 3          | 24.7%    | 0.997 | 3            | 22.2%    | 0.999 |                                                                  |          |      |              |       |        |                |        |       |             |        |        |  |
| FN1594 | 9                | 30.5%    | 1.000 | 7          | 23.7%    | 1.000 | 5          | 24.3%    | 1.000 | 13           | 35.0%    | 1.000 | AAL93709.1  Nitrogen fixation protein RNFG                       |          |      |              |       |        |                |        |       |             |        |        |  |
|        | 10               | 30.5%    | 1.000 | 8          | 35.0%    | 1.000 | 4          | 39.5%    | 1.000 | 12           | 35.0%    | 1.000 |                                                                  |          |      |              |       |        |                |        |       |             |        |        |  |
| FN1595 | 4                | 11.8%    | 1.000 | 3          | 11.8%    | 1.000 | 5          | 26.8%    | 1.000 | 4            | 11.8%    | 1.000 | AAL93710.1  Na(+)-translocating NADH-quinone reductase subunit B |          |      |              |       |        |                |        |       |             |        |        |  |
|        | 4                | 11.8%    | 1.000 | 4          | 11.8%    | 1.000 | 5          | 19.1%    | 1.000 | 5            | 19.1%    | 1.000 |                                                                  |          |      |              |       |        |                |        |       |             |        |        |  |
| FN1596 | 40               | 75.5%    | 1.000 | 34         | 73.9%    | 1.000 | 34         | 73.5%    | 1.000 | 40           | 72.6%    | 1.000 | AAL93711.1  Nitrogen fixation iron-sulphur protein RNFC          |          |      |              |       |        |                |        |       |             |        |        |  |
|        | 40               | 77.1%    | 1.000 | 35         | 73.5%    | 1.000 | 35         | 73.5%    | 1.000 | 43           | 75.7%    | 1.000 |                                                                  |          |      |              |       |        |                |        |       |             |        |        |  |
| FN1597 | 5                | 22.0%    | 1.000 | 7          | 39.8%    | 1.000 | 0          | 0.0%     | 0.000 | 4            | 18.8%    | 0.968 | AAL93712.1  Peptidyl-tRNA hydrolase                              |          |      |              |       |        |                |        |       |             |        |        |  |
|        | 6                | 22.0%    | 1.000 | 0          | 0.0%     | 0.000 | 1          | 9.4%     | 0.985 | 1            | 6.3%     | 0.762 |                                                                  |          |      |              |       |        |                |        |       |             |        |        |  |
| FN1600 | 3                | 22.3%    | 0.991 | 1          | 8.5%     | 0.921 | 3          | 18.6%    | 0.995 | 0            | 0.0%     | 0.000 | AAL93715.1  tRNA pseudouridine synthase A                        |          |      |              |       |        |                |        |       |             |        |        |  |
|        | 1                | 8.5%     | 0.982 | 3          | 16.2%    | 1.000 | 3          | 16.2%    | 1.000 | 2            | 11.3%    | 0.992 |                                                                  |          |      |              |       |        |                |        |       |             |        |        |  |
| FN1601 | 2                | 3.9%     | 0.915 | 2          | 3.9%     | 1.000 | 3          | 12.0%    | 1.000 | 2            | 4.2%     | 0.994 | AAL93716.1  Hypothetical cytosolic protein                       |          |      |              |       |        |                |        |       |             |        |        |  |
|        | 4                | 11.7%    | 1.000 | 2          | 7.8%     | 0.896 | 5          | 15.6%    | 1.000 | 0            | 0.0%     | 0.000 |                                                                  |          |      |              |       |        |                |        |       |             |        |        |  |
| FN1602 | 0                | 0.0%     | 0.000 | 0          | 0.0%     | 0.000 | 0          | 0.0%     | 0.000 | 2            | 12.8%    | 0.959 | AAL93717.1  Hypothetical cytosolic protein                       |          |      |              |       |        |                |        |       |             |        |        |  |
|        | 1                | 7.7%     | 0.970 | 1          | 6.4%     | 0.534 | 2          | 21.8%    | 0.613 | 3            | 22.4%    | 0.999 |                                                                  |          |      |              |       |        |                |        |       |             |        |        |  |
| FN1603 | 11               | 21.2%    | 1.000 | 3          | 8.8%     | 1.000 | 3          | 5.3%     | 0.980 | 4            | 5.1%     | 1.000 | AAL93718.1  2',3'-cyclic nucleotide 3'-phosphodiesterase         |          |      |              |       |        |                |        |       |             |        |        |  |
|        | 7                | 12.0%    | 1.000 | 1          | 1.5%     | 0.361 | 3          | 5.3%     | 0.998 | 5            | 9.5%     | 0.997 |                                                                  |          |      |              |       |        |                |        |       |             |        |        |  |
| FN1605 | 28               | 56.2%    | 1.000 | 25         | 44.7%    | 1.000 | 30         | 60.5%    | 1.000 | 30           | 58.1%    | 1.000 | AAL93720.1  Adenylosuccinate synthetase                          |          |      |              |       |        |                |        |       |             |        |        |  |
|        | 28               | 56.2%    | 1.000 | 38         | 68.9%    | 1.000 | 30         | 60.9%    | 1.000 | 28           | 58.1%    | 1.000 |                                                                  |          |      |              |       |        |                |        |       |             |        |        |  |

- Show detected proteins only
- Show all proteins

Filter by category:

GO: amino acid transport

Proteins found:  
1424

Enter (or paste) list of ORFs

Find ORFs

Dot Plots Dot Plots



| ORF    | Fn Summary Table |          |       | FnPg vs Fn |          |       | FnSg vs Fn |          |       | FnPgSg vs Fn |          |       | FnPgSg vs FnPg                                           |          |      | FnSg vs FnPg |       |        | FnPgSg vs FnSg |        |       | Fn Coverage |        |        |  |
|--------|------------------|----------|-------|------------|----------|-------|------------|----------|-------|--------------|----------|-------|----------------------------------------------------------|----------|------|--------------|-------|--------|----------------|--------|-------|-------------|--------|--------|--|
|        | Fn               |          |       | FnPg       |          |       | FnSg       |          |       | FnPgSg       |          |       | Description                                              |          |      |              | Fn    |        | FnPg           |        | FnSg  |             | FnPgSg |        |  |
|        | n                | coverage | prob  | n          | coverage | prob  | n          | coverage | prob  | n            | coverage | prob  | n                                                        | coverage | prob | Description  | Rep I | Rep II | Rep I          | Rep II | Rep I | Rep II      | Rep I  | Rep II |  |
| FN1606 | 9                | 11.1%    | 1.000 | 5          | 8.3%     | 1.000 | 9          | 13.1%    | 1.000 | 9            | 15.8%    | 1.000 | AAL93721.1  3-deoxy-D-manno-octulosonic-acid transferase |          |      |              |       |        |                |        |       |             |        |        |  |
|        | 12               | 15.5%    | 1.000 | 10         | 16.9%    | 1.000 | 12         | 16.1%    | 1.000 | 9            | 18.8%    | 1.000 |                                                          |          |      |              |       |        |                |        |       |             |        |        |  |
| FN1607 | 6                | 29.8%    | 1.000 | 3          | 17.9%    | 0.997 | 5          | 26.6%    | 1.000 | 2            | 5.0%     | 0.997 | AAL93722.1  Cytidylate kinase                            |          |      |              |       |        |                |        |       |             |        |        |  |
|        | 5                | 18.3%    | 1.000 | 7          | 33.0%    | 1.000 | 7          | 32.1%    | 1.000 | 4            | 18.3%    | 1.000 |                                                          |          |      |              |       |        |                |        |       |             |        |        |  |
| FN1608 | 2                | 7.4%     | 0.988 | 0          | 0.0%     | 0.000 | 5          | 24.7%    | 1.000 | 2            | 10.9%    | 0.807 | AAL93723.1  Ribosomal protein L11 methyltransferase      |          |      |              |       |        |                |        |       |             |        |        |  |
|        | 0                | 0.0%     | 0.000 | 4          | 17.3%    | 1.000 | 4          | 16.7%    | 1.000 | 2            | 7.1%     | 0.673 |                                                          |          |      |              |       |        |                |        |       |             |        |        |  |
| FN1609 | 10               | 28.5%    | 1.000 | 0          | 0.0%     | 0.000 | 3          | 9.9%     | 0.912 | 3            | 14.4%    | 0.977 | AAL93724.1  Hypothetical protein                         |          |      |              |       |        |                |        |       |             |        |        |  |
|        | 7                | 23.2%    | 1.000 | 10         | 28.9%    | 1.000 | 3          | 8.7%     | 0.998 | 2            | 8.7%     | 0.997 |                                                          |          |      |              |       |        |                |        |       |             |        |        |  |
| FN1610 | 9                | 43.9%    | 1.000 | 7          | 23.9%    | 1.000 | 9          | 38.6%    | 1.000 | 9            | 28.4%    | 1.000 | AAL93725.1  33 kDa chaperonin                            |          |      |              |       |        |                |        |       |             |        |        |  |
|        | 9                | 31.9%    | 1.000 | 11         | 43.2%    | 1.000 | 8          | 30.5%    | 1.000 | 8            | 34.4%    | 1.000 |                                                          |          |      |              |       |        |                |        |       |             |        |        |  |
| FN1611 | 2                | 11.3%    | 0.994 | 1          | 7.5%     | 0.896 | 0          | 0.0%     | 0.000 | 1            | 5.7%     | 0.555 | AAL93726.1  Competence protein                           |          |      |              |       |        |                |        |       |             |        |        |  |
|        | 3                | 13.2%    | 0.979 | 0          | 0.0%     | 0.000 | 1          | 4.4%     | 0.444 | 1            | 8.2%     | 0.340 |                                                          |          |      |              |       |        |                |        |       |             |        |        |  |
| FN1613 | 7                | 27.2%    | 1.000 | 7          | 19.6%    | 1.000 | 6          | 31.3%    | 1.000 | 7            | 25.3%    | 1.000 | AAL93728.1  Hypothetical protein                         |          |      |              |       |        |                |        |       |             |        |        |  |
|        | 8                | 23.4%    | 1.000 | 9          | 32.0%    | 1.000 | 9          | 33.2%    | 1.000 | 5            | 18.0%    | 1.000 |                                                          |          |      |              |       |        |                |        |       |             |        |        |  |
| FN1614 | 13               | 23.9%    | 1.000 | 11         | 22.5%    | 1.000 | 7          | 13.5%    | 1.000 | 7            | 19.3%    | 1.000 | AAL93729.1  MG(2+) chelataze family protein              |          |      |              |       |        |                |        |       |             |        |        |  |
|        | 11               | 16.3%    | 1.000 | 11         | 22.9%    | 1.000 | 6          | 14.9%    | 1.000 | 9            | 12.5%    | 1.000 |                                                          |          |      |              |       |        |                |        |       |             |        |        |  |
| FN1616 | 3                | 15.7%    | 1.000 | 1          | 10.5%    | 0.972 | 2          | 16.3%    | 1.000 | 6            | 26.1%    | 1.000 | AAL93731.1  N utilization substance protein B            |          |      |              |       |        |                |        |       |             |        |        |  |
|        | 3                | 15.7%    | 1.000 | 3          | 25.5%    | 1.000 | 3          | 25.5%    | 1.000 | 7            | 43.1%    | 1.000 |                                                          |          |      |              |       |        |                |        |       |             |        |        |  |
| FN1618 | 4                | 14.0%    | 1.000 | 4          | 14.0%    | 1.000 | 8          | 31.3%    | 1.000 | 10           | 27.4%    | 1.000 | AAL93733.1  Hypothetical protein                         |          |      |              |       |        |                |        |       |             |        |        |  |
|        | 5                | 27.4%    | 1.000 | 13         | 50.8%    | 1.000 | 12         | 31.8%    | 1.000 | 9            | 41.9%    | 1.000 |                                                          |          |      |              |       |        |                |        |       |             |        |        |  |
| FN1619 | 6                | 56.6%    | 1.000 | 4          | 20.5%    | 1.000 | 6          | 56.6%    | 1.000 | 9            | 62.3%    | 1.000 | AAL93734.1  Hypothetical cytosolic protein               |          |      |              |       |        |                |        |       |             |        |        |  |
|        | 5                | 48.4%    | 1.000 | 6          | 56.6%    | 1.000 | 6          | 56.6%    | 1.000 | 10           | 70.5%    | 1.000 |                                                          |          |      |              |       |        |                |        |       |             |        |        |  |
| FN1620 | 29               | 72.1%    | 1.000 | 21         | 59.1%    | 1.000 | 21         | 75.3%    | 1.000 | 31           | 70.4%    | 1.000 | AAL93735.1  SSU ribosomal protein S2P                    |          |      |              |       |        |                |        |       |             |        |        |  |
|        | 28               | 69.2%    | 1.000 | 22         | 73.3%    | 1.000 | 20         | 65.2%    | 1.000 | 31           | 73.3%    | 1.000 |                                                          |          |      |              |       |        |                |        |       |             |        |        |  |
| FN1621 | 42               | 67.3%    | 1.000 | 39         | 64.3%    | 1.000 | 32         | 70.0%    | 1.000 | 43           | 69.7%    | 1.000 | AAL93736.1  Protein Translation Elongation Factor Ts     |          |      |              |       |        |                |        |       |             |        |        |  |
|        | 41               | 71.0%    | 1.000 | 36         | 73.7%    | 1.000 | 33         | 70.0%    | 1.000 | 41           | 64.3%    | 1.000 |                                                          |          |      |              |       |        |                |        |       |             |        |        |  |
| FN1622 | 18               | 62.8%    | 1.000 | 11         | 47.3%    | 1.000 | 9          | 36.4%    | 1.000 | 17           | 63.2%    | 1.000 | AAL93737.1  Uridylate kinase                             |          |      |              |       |        |                |        |       |             |        |        |  |
|        | 20               | 58.6%    | 1.000 | 18         | 72.0%    | 1.000 | 12         | 51.0%    | 1.000 | 17           | 59.0%    | 1.000 |                                                          |          |      |              |       |        |                |        |       |             |        |        |  |
| FN1623 | 12               | 52.6%    | 1.000 | 6          | 27.9%    | 1.000 | 8          | 47.9%    | 1.000 | 15           | 52.1%    | 1.000 | AAL93738.1  Ribosome Recycling Factor (RRF)              |          |      |              |       |        |                |        |       |             |        |        |  |
|        | 9                | 41.6%    | 1.000 | 11         | 47.9%    | 1.000 | 4          | 28.9%    | 1.000 | 11           | 52.1%    | 1.000 |                                                          |          |      |              |       |        |                |        |       |             |        |        |  |
| FN1624 | 8                | 16.9%    | 1.000 | 2          | 5.9%     | 1.000 | 2          | 8.0%     | 0.999 | 6            | 16.9%    | 1.000 | AAL93739.1  Protein translocase subunit secY             |          |      |              |       |        |                |        |       |             |        |        |  |
|        | 7                | 13.6%    | 1.000 | 5          | 15.0%    | 1.000 | 4          | 11.3%    | 1.000 | 5            | 16.9%    | 1.000 |                                                          |          |      |              |       |        |                |        |       |             |        |        |  |

Show detected proteins only  
 Show all proteins  
 Filter by category:

Proteins found:  
 1424

Enter (or paste) list of ORFs

| ORF    | Fn Summary Table |          |       | FnPg vs Fn |          |       | FnSg vs Fn |          |       | FnPgSg vs Fn |          |       | FnPgSg vs FnPg                         |          |      | FnSg vs FnPg |       |        | FnPgSg vs FnSg |        |       | Fn Coverage |        |        |  |
|--------|------------------|----------|-------|------------|----------|-------|------------|----------|-------|--------------|----------|-------|----------------------------------------|----------|------|--------------|-------|--------|----------------|--------|-------|-------------|--------|--------|--|
|        | Fn               |          |       | FnPg       |          |       | FnSg       |          |       | FnPgSg       |          |       | Description                            |          |      |              | Fn    |        | FnPg           |        | FnSg  |             | FnPgSg |        |  |
|        | n                | coverage | prob  | n          | coverage | prob  | n          | coverage | prob  | n            | coverage | prob  | n                                      | coverage | prob | Description  | Rep I | Rep II | Rep I          | Rep II | Rep I | Rep II      | Rep I  | Rep II |  |
| FN1625 | 15               | 32.1%    | 1.000 | 7          | 34.0%    | 1.000 | 7          | 25.8%    | 1.000 | 16           | 32.1%    | 1.000 | AAL93740.1  LSU ribosomal protein L15P |          |      |              |       |        |                |        |       |             |        |        |  |
|        | 12               | 31.4%    | 1.000 | 9          | 37.7%    | 1.000 | 10         | 38.4%    | 1.000 | 15           | 49.7%    | 1.000 |                                        |          |      |              |       |        |                |        |       |             |        |        |  |
| FN1626 | 5                | 39.3%    | 1.000 | 1          | 23.0%    | 0.984 | 2          | 37.7%    | 0.988 | 7            | 39.3%    | 1.000 | AAL93741.1  LSU ribosomal protein L30P |          |      |              |       |        |                |        |       |             |        |        |  |
|        | 5                | 39.3%    | 1.000 | 4          | 39.3%    | 1.000 | 4          | 39.3%    | 1.000 | 6            | 39.3%    | 1.000 |                                        |          |      |              |       |        |                |        |       |             |        |        |  |
| FN1627 | 8                | 47.6%    | 1.000 | 7          | 39.6%    | 1.000 | 11         | 61.0%    | 1.000 | 10           | 45.1%    | 1.000 | AAL93742.1  SSU ribosomal protein S5P  |          |      |              |       |        |                |        |       |             |        |        |  |
|        | 8                | 47.6%    | 1.000 | 10         | 58.5%    | 1.000 | 11         | 61.0%    | 1.000 | 12           | 52.4%    | 1.000 |                                        |          |      |              |       |        |                |        |       |             |        |        |  |
| FN1628 | 6                | 30.3%    | 1.000 | 5          | 30.3%    | 1.000 | 3          | 39.3%    | 1.000 | 8            | 48.4%    | 1.000 | AAL93743.1  LSU ribosomal protein L18P |          |      |              |       |        |                |        |       |             |        |        |  |
|        | 6                | 30.3%    | 1.000 | 2          | 28.7%    | 1.000 | 1          | 21.3%    | 0.985 | 8            | 48.4%    | 1.000 |                                        |          |      |              |       |        |                |        |       |             |        |        |  |
| FN1629 | 22               | 65.0%    | 1.000 | 16         | 63.3%    | 1.000 | 12         | 55.4%    | 1.000 | 19           | 65.0%    | 1.000 | AAL93744.1  LSU ribosomal protein L6P  |          |      |              |       |        |                |        |       |             |        |        |  |
|        | 20               | 65.0%    | 1.000 | 17         | 72.9%    | 1.000 | 14         | 65.0%    | 1.000 | 20           | 65.0%    | 1.000 |                                        |          |      |              |       |        |                |        |       |             |        |        |  |
| FN1630 | 9                | 47.7%    | 1.000 | 5          | 28.8%    | 1.000 | 4          | 36.4%    | 1.000 | 7            | 43.2%    | 1.000 | AAL93745.1  SSU ribosomal protein S8P  |          |      |              |       |        |                |        |       |             |        |        |  |
|        | 9                | 47.7%    | 1.000 | 9          | 61.4%    | 1.000 | 6          | 43.2%    | 1.000 | 7            | 35.6%    | 1.000 |                                        |          |      |              |       |        |                |        |       |             |        |        |  |
| FN1631 | 3                | 28.4%    | 1.000 | 0          | 0.0%     | 0.000 | 3          | 28.4%    | 0.997 | 5            | 28.4%    | 1.000 | AAL93746.1  SSU ribosomal protein S14P |          |      |              |       |        |                |        |       |             |        |        |  |
|        | 2                | 13.7%    | 0.999 | 3          | 15.8%    | 1.000 | 0          | 0.0%     | 0.000 | 5            | 28.4%    | 1.000 |                                        |          |      |              |       |        |                |        |       |             |        |        |  |
| FN1632 | 28               | 71.6%    | 1.000 | 13         | 43.7%    | 1.000 | 22         | 73.2%    | 1.000 | 24           | 69.9%    | 1.000 | AAL93747.1  LSU ribosomal protein L5P  |          |      |              |       |        |                |        |       |             |        |        |  |
|        | 26               | 71.6%    | 1.000 | 23         | 76.5%    | 1.000 | 18         | 70.5%    | 1.000 | 24           | 69.9%    | 1.000 |                                        |          |      |              |       |        |                |        |       |             |        |        |  |
| FN1634 | 6                | 66.7%    | 1.000 | 5          | 66.7%    | 1.000 | 3          | 66.7%    | 1.000 | 4            | 60.6%    | 1.000 | AAL93749.1  LSU ribosomal protein L24P |          |      |              |       |        |                |        |       |             |        |        |  |
|        | 6                | 66.7%    | 1.000 | 2          | 60.6%    | 0.997 | 2          | 60.6%    | 0.997 | 4            | 60.6%    | 1.000 |                                        |          |      |              |       |        |                |        |       |             |        |        |  |
| FN1635 | 10               | 49.2%    | 1.000 | 3          | 35.2%    | 1.000 | 3          | 24.6%    | 1.000 | 8            | 43.4%    | 1.000 | AAL93750.1  LSU ribosomal protein L14P |          |      |              |       |        |                |        |       |             |        |        |  |
|        | 9                | 43.4%    | 1.000 | 4          | 36.1%    | 1.000 | 4          | 36.1%    | 1.000 | 8            | 42.6%    | 1.000 |                                        |          |      |              |       |        |                |        |       |             |        |        |  |
| FN1636 | 7                | 57.8%    | 1.000 | 3          | 37.3%    | 1.000 | 10         | 60.2%    | 1.000 | 8            | 48.2%    | 1.000 | AAL93751.1  SSU ribosomal protein S17P |          |      |              |       |        |                |        |       |             |        |        |  |
|        | 6                | 55.4%    | 1.000 | 9          | 60.2%    | 1.000 | 7          | 48.2%    | 1.000 | 6            | 48.2%    | 1.000 |                                        |          |      |              |       |        |                |        |       |             |        |        |  |
| FN1637 | 3                | 35.0%    | 1.000 | 1          | 21.7%    | 0.984 | 0          | 0.0%     | 0.000 | 6            | 68.3%    | 1.000 | AAL93752.1  LSU ribosomal protein L29P |          |      |              |       |        |                |        |       |             |        |        |  |
|        | 4                | 46.7%    | 1.000 | 2          | 35.0%    | 0.988 | 1          | 21.7%    | 0.984 | 7            | 68.3%    | 1.000 |                                        |          |      |              |       |        |                |        |       |             |        |        |  |
| FN1638 | 7                | 35.0%    | 1.000 | 8          | 35.0%    | 1.000 | 6          | 35.0%    | 1.000 | 7            | 35.0%    | 1.000 | AAL93753.1  LSU ribosomal protein L16P |          |      |              |       |        |                |        |       |             |        |        |  |
|        | 7                | 35.0%    | 1.000 | 8          | 45.5%    | 1.000 | 8          | 45.5%    | 1.000 | 7            | 35.0%    | 1.000 |                                        |          |      |              |       |        |                |        |       |             |        |        |  |
| FN1639 | 31               | 60.7%    | 1.000 | 27         | 57.1%    | 1.000 | 24         | 60.7%    | 1.000 | 34           | 60.7%    | 1.000 | AAL93754.1  SSU ribosomal protein S3P  |          |      |              |       |        |                |        |       |             |        |        |  |
|        | 32               | 60.7%    | 1.000 | 28         | 70.3%    | 1.000 | 24         | 60.7%    | 1.000 | 32           | 60.7%    | 1.000 |                                        |          |      |              |       |        |                |        |       |             |        |        |  |
| FN1640 | 11               | 57.7%    | 1.000 | 10         | 56.8%    | 1.000 | 6          | 53.2%    | 1.000 | 14           | 64.9%    | 1.000 | AAL93755.1  LSU ribosomal protein L22P |          |      |              |       |        |                |        |       |             |        |        |  |
|        | 11               | 58.6%    | 1.000 | 8          | 53.2%    | 1.000 | 7          | 52.3%    | 1.000 | 15           | 64.0%    | 1.000 |                                        |          |      |              |       |        |                |        |       |             |        |        |  |
| FN1641 | 13               | 59.3%    | 1.000 | 7          | 49.5%    | 1.000 | 4          | 58.2%    | 1.000 | 11           | 58.2%    | 1.000 | AAL93756.1  SSU ribosomal protein S19P |          |      |              |       |        |                |        |       |             |        |        |  |
|        | 13               | 59.3%    | 1.000 | 9          | 58.2%    | 1.000 | 8          | 58.2%    | 1.000 | 12           | 58.2%    | 1.000 |                                        |          |      |              |       |        |                |        |       |             |        |        |  |

Show detected proteins only  
 Show all proteins  
 Filter by category:

Proteins found:  
 1424

Enter (or paste) list of ORFs

| ORF    | Fn Summary Table |          |       | FnPg vs Fn |          |       | FnSg vs Fn |          |       | FnPgSg vs Fn |          |       | FnPgSg vs FnPg                                |          |      | FnSg vs FnPg |       |        | FnPgSg vs FnSg |        |       | Fn Coverage |        |        |  |
|--------|------------------|----------|-------|------------|----------|-------|------------|----------|-------|--------------|----------|-------|-----------------------------------------------|----------|------|--------------|-------|--------|----------------|--------|-------|-------------|--------|--------|--|
|        | Fn               |          |       | FnPg       |          |       | FnSg       |          |       | FnPgSg       |          |       | Description                                   |          |      |              | Fn    |        | FnPg           |        | FnSg  |             | FnPgSg |        |  |
|        | n                | coverage | prob  | n          | coverage | prob  | n          | coverage | prob  | n            | coverage | prob  | n                                             | coverage | prob | Description  | Rep I | Rep II | Rep I          | Rep II | Rep I | Rep II      | Rep I  | Rep II |  |
| FN1642 | 22               | 45.3%    | 1.000 | 20         | 36.2%    | 1.000 | 22         | 53.6%    | 1.000 | 24           | 45.7%    | 1.000 | AAL93757.1  LSU ribosomal protein L2P         |          |      |              |       |        |                |        |       |             |        |        |  |
|        | 21               | 42.8%    | 1.000 | 16         | 47.8%    | 1.000 | 18         | 44.2%    | 1.000 | 26           | 51.8%    | 1.000 |                                               |          |      |              |       |        |                |        |       |             |        |        |  |
| FN1643 | 6                | 27.4%    | 1.000 | 11         | 44.2%    | 1.000 | 7          | 44.2%    | 1.000 | 8            | 42.1%    | 1.000 | AAL93758.1  LSU ribosomal protein L23P        |          |      |              |       |        |                |        |       |             |        |        |  |
|        | 6                | 27.4%    | 1.000 | 8          | 53.7%    | 1.000 | 4          | 30.5%    | 1.000 | 10           | 42.1%    | 1.000 |                                               |          |      |              |       |        |                |        |       |             |        |        |  |
| FN1644 | 20               | 54.1%    | 1.000 | 17         | 55.5%    | 1.000 | 14         | 49.3%    | 1.000 | 18           | 53.6%    | 1.000 | AAL93759.1  LSU ribosomal protein L1E         |          |      |              |       |        |                |        |       |             |        |        |  |
|        | 16               | 52.2%    | 1.000 | 15         | 53.1%    | 1.000 | 12         | 45.9%    | 1.000 | 17           | 53.6%    | 1.000 |                                               |          |      |              |       |        |                |        |       |             |        |        |  |
| FN1645 | 27               | 67.8%    | 1.000 | 27         | 69.7%    | 1.000 | 16         | 50.2%    | 1.000 | 26           | 67.8%    | 1.000 | AAL93760.1  LSU ribosomal protein L3P         |          |      |              |       |        |                |        |       |             |        |        |  |
|        | 25               | 67.8%    | 1.000 | 19         | 51.2%    | 1.000 | 17         | 66.4%    | 1.000 | 26           | 67.3%    | 1.000 |                                               |          |      |              |       |        |                |        |       |             |        |        |  |
| FN1646 | 15               | 56.3%    | 1.000 | 11         | 56.3%    | 1.000 | 12         | 56.3%    | 1.000 | 16           | 56.3%    | 1.000 | AAL93761.1  SSU ribosomal protein S10P        |          |      |              |       |        |                |        |       |             |        |        |  |
|        | 13               | 56.3%    | 1.000 | 11         | 56.3%    | 1.000 | 11         | 56.3%    | 1.000 | 15           | 56.3%    | 1.000 |                                               |          |      |              |       |        |                |        |       |             |        |        |  |
| FN1647 | 10               | 56.8%    | 1.000 | 8          | 56.8%    | 1.000 | 8          | 51.1%    | 1.000 | 13           | 83.5%    | 1.000 | AAL93762.1  Hypothetical protein              |          |      |              |       |        |                |        |       |             |        |        |  |
|        | 10               | 56.8%    | 1.000 | 8          | 51.1%    | 1.000 | 7          | 51.1%    | 1.000 | 12           | 67.6%    | 1.000 |                                               |          |      |              |       |        |                |        |       |             |        |        |  |
| FN1652 | 22               | 44.3%    | 1.000 | 12         | 21.6%    | 1.000 | 15         | 43.9%    | 1.000 | 21           | 46.7%    | 1.000 | AAL93767.1  Oligopeptide-binding protein oppA |          |      |              |       |        |                |        |       |             |        |        |  |
|        | 22               | 43.5%    | 1.000 | 16         | 35.9%    | 1.000 | 18         | 49.3%    | 1.000 | 16           | 32.5%    | 1.000 |                                               |          |      |              |       |        |                |        |       |             |        |        |  |
| FN1654 | 9                | 14.7%    | 1.000 | 5          | 11.7%    | 1.000 | 29         | 52.9%    | 1.000 | 15           | 31.7%    | 1.000 | AAL93769.1  Hypothetical protein              |          |      |              |       |        |                |        |       |             |        |        |  |
|        | 9                | 15.4%    | 1.000 | 31         | 52.2%    | 1.000 | 35         | 54.5%    | 1.000 | 9            | 17.9%    | 1.000 |                                               |          |      |              |       |        |                |        |       |             |        |        |  |
| FN1655 | 18               | 35.5%    | 1.000 | 19         | 31.1%    | 1.000 | 25         | 44.7%    | 1.000 | 15           | 27.7%    | 1.000 | AAL93770.1  Hypothetical cytosolic protein    |          |      |              |       |        |                |        |       |             |        |        |  |
|        | 18               | 34.4%    | 1.000 | 19         | 35.9%    | 1.000 | 34         | 53.5%    | 1.000 | 13           | 25.0%    | 1.000 |                                               |          |      |              |       |        |                |        |       |             |        |        |  |
| FN1656 | 1                | 12.5%    | 0.813 | 0          | 0.0%     | 0.000 | 0          | 0.0%     | 0.000 | 4            | 25.0%    | 1.000 | AAL93771.1  SSU ribosomal protein S18P        |          |      |              |       |        |                |        |       |             |        |        |  |
|        | 1                | 12.5%    | 0.765 | 1          | 12.5%    | 0.862 | 1          | 12.5%    | 0.803 | 6            | 34.7%    | 1.000 |                                               |          |      |              |       |        |                |        |       |             |        |        |  |
| FN1657 | 13               | 66.7%    | 1.000 | 8          | 66.7%    | 1.000 | 5          | 58.1%    | 1.000 | 10           | 66.7%    | 1.000 | AAL93772.1  SSU ribosomal protein S6P         |          |      |              |       |        |                |        |       |             |        |        |  |
|        | 12               | 66.7%    | 1.000 | 5          | 47.6%    | 1.000 | 7          | 65.7%    | 1.000 | 13           | 66.7%    | 1.000 |                                               |          |      |              |       |        |                |        |       |             |        |        |  |
| FN1658 | 32               | 49.2%    | 1.000 | 15         | 28.4%    | 1.000 | 20         | 39.3%    | 1.000 | 31           | 51.7%    | 1.000 | AAL93773.1  Prolyl-tRNA synthetase            |          |      |              |       |        |                |        |       |             |        |        |  |
|        | 29               | 49.2%    | 1.000 | 24         | 47.1%    | 1.000 | 27         | 53.6%    | 1.000 | 32           | 54.3%    | 1.000 |                                               |          |      |              |       |        |                |        |       |             |        |        |  |
| FN1660 | 2                | 2.6%     | 0.985 | 0          | 0.0%     | 0.000 | 2          | 2.6%     | 0.989 | 0            | 0.0%     | 0.000 | AAL93775.1  ATP-dependent DNA helicase recG   |          |      |              |       |        |                |        |       |             |        |        |  |
|        | 3                | 7.7%     | 0.981 | 1          | 1.5%     | 0.364 | 4          | 6.2%     | 0.999 | 1            | 2.3%     | 0.393 |                                               |          |      |              |       |        |                |        |       |             |        |        |  |
| FN1661 | 8                | 32.1%    | 1.000 | 6          | 32.1%    | 1.000 | 5          | 33.3%    | 1.000 | 8            | 36.1%    | 1.000 | AAL93776.1  Hypothetical cytosolic protein    |          |      |              |       |        |                |        |       |             |        |        |  |
|        | 6                | 25.7%    | 1.000 | 10         | 45.8%    | 1.000 | 5          | 22.9%    | 1.000 | 5            | 16.9%    | 1.000 |                                               |          |      |              |       |        |                |        |       |             |        |        |  |
| FN1662 | 10               | 20.0%    | 1.000 | 8          | 21.3%    | 1.000 | 11         | 20.2%    | 1.000 | 13           | 24.6%    | 1.000 | AAL93777.1  Hypothetical protein              |          |      |              |       |        |                |        |       |             |        |        |  |
|        | 11               | 17.1%    | 1.000 | 12         | 26.9%    | 1.000 | 20         | 35.5%    | 1.000 | 10           | 25.4%    | 1.000 |                                               |          |      |              |       |        |                |        |       |             |        |        |  |
| FN1663 | 4                | 11.4%    | 1.000 | 0          | 0.0%     | 0.000 | 3          | 9.6%     | 0.999 | 5            | 12.1%    | 1.000 | AAL93778.1  Hypothetical protein              |          |      |              |       |        |                |        |       |             |        |        |  |
|        | 4                | 11.4%    | 1.000 | 5          | 13.4%    | 1.000 | 8          | 19.1%    | 1.000 | 4            | 11.2%    | 1.000 |                                               |          |      |              |       |        |                |        |       |             |        |        |  |

Show detected proteins only  
 Show all proteins  
 Filter by category:

Proteins found:  
 1424

Enter (or paste) list of ORFs

| ORF    | Fn Summary Table |          |       | FnPg vs Fn |          |       | FnSg vs Fn |          |       | FnPgSg vs Fn |          |       | FnPgSg vs FnPg                                                  |          |      | FnSg vs FnPg |       |        | FnPgSg vs FnSg |        |       | Fn Coverage |        |        |  |
|--------|------------------|----------|-------|------------|----------|-------|------------|----------|-------|--------------|----------|-------|-----------------------------------------------------------------|----------|------|--------------|-------|--------|----------------|--------|-------|-------------|--------|--------|--|
|        | Fn               |          |       | FnPg       |          |       | FnSg       |          |       | FnPgSg       |          |       | Description                                                     |          |      |              | Fn    |        | FnPg           |        | FnSg  |             | FnPgSg |        |  |
|        | n                | coverage | prob  | n          | coverage | prob  | n          | coverage | prob  | n            | coverage | prob  | n                                                               | coverage | prob | Description  | Rep I | Rep II | Rep I          | Rep II | Rep I | Rep II      | Rep I  | Rep II |  |
| FN1666 | 1                | 6.8%     | 0.317 | 1          | 9.4%     | 0.265 | 1          | 11.1%    | 0.816 | 0            | 0.0%     | 0.000 | AAL93781.1  Hypothetical protein                                |          |      |              |       |        |                |        |       |             |        |        |  |
|        | 3                | 27.4%    | 0.988 | 0          | 0.0%     | 0.000 | 0          | 0.0%     | 0.000 | 1            | 11.1%    | 0.986 |                                                                 |          |      |              |       |        |                |        |       |             |        |        |  |
| FN1667 | 0                | 0.0%     | 0.000 | 3          | 10.0%    | 1.000 | 1          | 3.8%     | 0.286 | 0            | 0.0%     | 0.000 | AAL93782.1  dTDP-glucose 4,6-dehydratase                        |          |      |              |       |        |                |        |       |             |        |        |  |
|        | 2                | 8.0%     | 0.594 | 0          | 0.0%     | 0.000 | 3          | 8.5%     | 0.846 | 1            | 1.8%     | 0.308 |                                                                 |          |      |              |       |        |                |        |       |             |        |        |  |
| FN1668 | 0                | 0.0%     |       | 1          | 3.8%     | 0.278 | 1          | 6.6%     | 0.985 | 2            | 9.7%     | 0.912 | AAL93783.1  Cholinephosphate cytidyltransferase                 |          |      |              |       |        |                |        |       |             |        |        |  |
|        | 0                | 0.0%     |       | 4          | 15.5%    | 0.891 | 3          | 13.1%    | 0.998 | 1            | 3.8%     | 0.377 |                                                                 |          |      |              |       |        |                |        |       |             |        |        |  |
| FN1670 | 17               | 29.9%    | 1.000 | 8          | 14.5%    | 1.000 | 8          | 16.4%    | 1.000 | 14           | 22.9%    | 1.000 | AAL93785.1  Choline kinase                                      |          |      |              |       |        |                |        |       |             |        |        |  |
|        | 19               | 30.4%    | 1.000 | 12         | 24.2%    | 1.000 | 16         | 28.6%    | 1.000 | 10           | 15.9%    | 1.000 |                                                                 |          |      |              |       |        |                |        |       |             |        |        |  |
| FN1671 | 4                | 6.5%     | 1.000 | 2          | 5.6%     | 0.935 | 1          | 5.2%     | 0.297 | 2            | 7.9%     | 0.994 | AAL93786.1  hypothetical exported protein                       |          |      |              |       |        |                |        |       |             |        |        |  |
|        | 3                | 10.6%    | 0.908 | 2          | 9.0%     | 0.751 | 1          | 5.6%     | 0.316 | 2            | 4.0%     | 0.922 |                                                                 |          |      |              |       |        |                |        |       |             |        |        |  |
| FN1676 | 0                | 0.0%     |       | 0          | 0.0%     |       | 0          | 0.0%     | 0.000 | 0            | 0.0%     |       | AAL93791.1  Transposase                                         |          |      |              |       |        |                |        |       |             |        |        |  |
|        | 0                | 0.0%     |       | 0          | 0.0%     |       | 3          | 11.0%    | 0.998 | 0            | 0.0%     |       |                                                                 |          |      |              |       |        |                |        |       |             |        |        |  |
| FN1679 | 30               | 67.0%    | 1.000 | 20         | 57.1%    | 1.000 | 30         | 72.4%    | 1.000 | 31           | 72.7%    | 1.000 | AAL93794.1  LPS biosynthesis protein WbpG                       |          |      |              |       |        |                |        |       |             |        |        |  |
|        | 28               | 67.0%    | 1.000 | 37         | 78.0%    | 1.000 | 34         | 74.8%    | 1.000 | 26           | 67.6%    | 1.000 |                                                                 |          |      |              |       |        |                |        |       |             |        |        |  |
| FN1683 | 12               | 46.3%    | 1.000 | 10         | 34.5%    | 1.000 | 9          | 31.6%    | 1.000 | 9            | 45.2%    | 1.000 | AAL93798.1  Acetyltransferase                                   |          |      |              |       |        |                |        |       |             |        |        |  |
|        | 12               | 45.8%    | 1.000 | 7          | 22.0%    | 1.000 | 8          | 20.9%    | 1.000 | 6            | 29.4%    | 1.000 |                                                                 |          |      |              |       |        |                |        |       |             |        |        |  |
| FN1684 | 27               | 58.4%    | 1.000 | 25         | 57.8%    | 1.000 | 24         | 62.1%    | 1.000 | 31           | 68.1%    | 1.000 | AAL93799.1  N-acetylneuraminase synthase                        |          |      |              |       |        |                |        |       |             |        |        |  |
|        | 29               | 63.0%    | 1.000 | 32         | 67.8%    | 1.000 | 29         | 67.2%    | 1.000 | 31           | 68.4%    | 1.000 |                                                                 |          |      |              |       |        |                |        |       |             |        |        |  |
| FN1685 | 15               | 40.4%    | 1.000 | 8          | 20.5%    | 1.000 | 9          | 26.4%    | 1.000 | 14           | 51.7%    | 1.000 | AAL93800.1  dTDP-4-dehydrorhamnose reductase                    |          |      |              |       |        |                |        |       |             |        |        |  |
|        | 14               | 30.1%    | 1.000 | 12         | 30.5%    | 1.000 | 13         | 32.9%    | 1.000 | 13           | 35.6%    | 1.000 |                                                                 |          |      |              |       |        |                |        |       |             |        |        |  |
| FN1686 | 22               | 67.6%    | 1.000 | 16         | 55.2%    | 1.000 | 18         | 57.1%    | 1.000 | 24           | 67.6%    | 1.000 | AAL93801.1  Spore coat polysaccharide biosynthesis protein spsF |          |      |              |       |        |                |        |       |             |        |        |  |
|        | 23               | 64.1%    | 1.000 | 18         | 54.8%    | 1.000 | 22         | 71.8%    | 1.000 | 21           | 64.9%    | 1.000 |                                                                 |          |      |              |       |        |                |        |       |             |        |        |  |
| FN1687 | 24               | 70.7%    | 1.000 | 17         | 54.1%    | 1.000 | 15         | 61.1%    | 1.000 | 21           | 70.7%    | 1.000 | AAL93802.1  Gluconate 5-dehydrogenase                           |          |      |              |       |        |                |        |       |             |        |        |  |
|        | 22               | 67.8%    | 1.000 | 19         | 70.7%    | 1.000 | 20         | 66.7%    | 1.000 | 23           | 73.3%    | 1.000 |                                                                 |          |      |              |       |        |                |        |       |             |        |        |  |
| FN1688 | 11               | 27.6%    | 1.000 | 13         | 44.5%    | 1.000 | 8          | 43.4%    | 1.000 | 11           | 42.1%    | 1.000 | AAL93803.1  Oxidoreductase                                      |          |      |              |       |        |                |        |       |             |        |        |  |
|        | 11               | 31.0%    | 1.000 | 11         | 47.2%    | 1.000 | 11         | 44.5%    | 1.000 | 11           | 42.1%    | 1.000 |                                                                 |          |      |              |       |        |                |        |       |             |        |        |  |
| FN1689 | 31               | 66.1%    | 1.000 | 23         | 47.3%    | 1.000 | 22         | 58.0%    | 1.000 | 32           | 60.4%    | 1.000 | AAL93804.1  UDP-N-acetylglucosamine 4,6-dehydratase             |          |      |              |       |        |                |        |       |             |        |        |  |
|        | 34               | 62.5%    | 1.000 | 29         | 66.7%    | 1.000 | 25         | 73.2%    | 1.000 | 34           | 66.7%    | 1.000 |                                                                 |          |      |              |       |        |                |        |       |             |        |        |  |
| FN1690 | 16               | 41.2%    | 1.000 | 15         | 44.3%    | 1.000 | 12         | 34.0%    | 1.000 | 11           | 41.2%    | 1.000 | AAL93805.1  Hypothetical protein                                |          |      |              |       |        |                |        |       |             |        |        |  |
|        | 18               | 47.7%    | 1.000 | 11         | 36.6%    | 1.000 | 15         | 44.7%    | 1.000 | 8            | 27.1%    | 1.000 |                                                                 |          |      |              |       |        |                |        |       |             |        |        |  |
| FN1692 | 16               | 37.3%    | 1.000 | 3          | 15.7%    | 1.000 | 10         | 29.5%    | 1.000 | 15           | 44.0%    | 1.000 | AAL93807.1  Glycosyl transferase                                |          |      |              |       |        |                |        |       |             |        |        |  |
|        | 16               | 41.0%    | 1.000 | 13         | 40.3%    | 1.000 | 12         | 30.2%    | 1.000 | 12           | 36.9%    | 1.000 |                                                                 |          |      |              |       |        |                |        |       |             |        |        |  |

Show detected proteins only  
 Show all proteins  
 Filter by category:

Proteins found:  
 1424

Enter (or paste) list of ORFs

|        |    | Fn Summary Table |          |      | FnPg vs Fn |          |      | FnSg vs Fn |          |      | FnPgSg vs Fn |          |                                                       | FnPgSg vs FnPg |          |      | FnSg vs FnPg |        |       | FnPgSg vs FnSg |       |        | Fn Coverage |        |  |        |  |
|--------|----|------------------|----------|------|------------|----------|------|------------|----------|------|--------------|----------|-------------------------------------------------------|----------------|----------|------|--------------|--------|-------|----------------|-------|--------|-------------|--------|--|--------|--|
| ORF    |    | Fn               |          |      | FnPg       |          |      | FnSg       |          |      | FnPgSg       |          |                                                       | Description    |          |      |              |        |       | Fn             |       | FnPg   |             | FnSg   |  | FnPgSg |  |
|        |    | n                | coverage | prob | n          | coverage | prob | n          | coverage | prob | n            | coverage | prob                                                  | n              | coverage | prob | Rep I        | Rep II | Rep I | Rep II         | Rep I | Rep II | Rep I       | Rep II |  |        |  |
| FN1693 | 9  | 26.4%            | 1.000    | 4    | 19.2%      | 1.000    | 7    | 35.2%      | 1.000    | 12   | 53.9%        | 1.000    | AAL93808.1  Hypothetical protein                      |                |          |      |              |        |       |                |       |        |             |        |  |        |  |
|        | 11 | 26.4%            | 1.000    | 6    | 26.9%      | 1.000    | 6    | 40.4%      | 1.000    | 7    | 31.6%        | 1.000    |                                                       |                |          |      |              |        |       |                |       |        |             |        |  |        |  |
| FN1694 | 21 | 49.3%            | 1.000    | 15   | 42.1%      | 1.000    | 9    | 32.1%      | 1.000    | 19   | 58.6%        | 1.000    | AAL93809.1  UDP-N-acetyl-D-quinovosamine 4-epimerase  |                |          |      |              |        |       |                |       |        |             |        |  |        |  |
|        | 19 | 48.6%            | 1.000    | 13   | 35.9%      | 1.000    | 14   | 44.5%      | 1.000    | 18   | 52.8%        | 1.000    |                                                       |                |          |      |              |        |       |                |       |        |             |        |  |        |  |
| FN1695 | 6  | 23.5%            | 1.000    | 3    | 15.2%      | 0.999    | 7    | 42.2%      | 1.000    | 7    | 26.1%        | 1.000    | AAL93810.1  Probable quinovosaminephosphotransferase  |                |          |      |              |        |       |                |       |        |             |        |  |        |  |
|        | 6  | 23.5%            | 1.000    | 4    | 30.0%      | 1.000    | 5    | 18.7%      | 1.000    | 7    | 37.4%        | 1.000    |                                                       |                |          |      |              |        |       |                |       |        |             |        |  |        |  |
| FN1696 | 35 | 48.9%            | 1.000    | 23   | 36.4%      | 1.000    | 39   | 61.0%      | 1.000    | 29   | 47.6%        | 1.000    | AAL93811.1  UDP-N-acetylglucosamine 4,6-dehydratase   |                |          |      |              |        |       |                |       |        |             |        |  |        |  |
|        | 34 | 50.1%            | 1.000    | 35   | 53.9%      | 1.000    | 36   | 57.5%      | 1.000    | 27   | 44.6%        | 1.000    |                                                       |                |          |      |              |        |       |                |       |        |             |        |  |        |  |
| FN1697 | 27 | 38.1%            | 1.000    | 11   | 28.7%      | 1.000    | 24   | 53.7%      | 1.000    | 18   | 42.4%        | 1.000    | AAL93812.1  Hypothetical protein                      |                |          |      |              |        |       |                |       |        |             |        |  |        |  |
|        | 27 | 36.0%            | 1.000    | 22   | 43.3%      | 1.000    | 22   | 58.8%      | 1.000    | 18   | 42.4%        | 1.000    |                                                       |                |          |      |              |        |       |                |       |        |             |        |  |        |  |
| FN1698 | 20 | 50.7%            | 1.000    | 14   | 35.2%      | 1.000    | 24   | 51.3%      | 1.000    | 20   | 47.0%        | 1.000    | AAL93813.1  dTDP-4-dehydrorhamnose reductase          |                |          |      |              |        |       |                |       |        |             |        |  |        |  |
|        | 19 | 45.6%            | 1.000    | 28   | 54.0%      | 1.000    | 25   | 52.3%      | 1.000    | 19   | 52.3%        | 1.000    |                                                       |                |          |      |              |        |       |                |       |        |             |        |  |        |  |
| FN1700 | 2  | 16.3%            | 0.995    | 0    | 0.0%       | 0.000    | 3    | 25.0%      | 0.948    | 2    | 18.5%        | 0.852    | AAL93815.1  Hypothetical protein                      |                |          |      |              |        |       |                |       |        |             |        |  |        |  |
|        | 6  | 25.0%            | 1.000    | 2    | 13.0%      | 0.990    | 1    | 8.2%       | 0.938    | 1    | 7.1%         | 0.307    |                                                       |                |          |      |              |        |       |                |       |        |             |        |  |        |  |
| FN1701 | 10 | 25.2%            | 1.000    | 7    | 14.5%      | 1.000    | 14   | 29.6%      | 1.000    | 11   | 25.8%        | 1.000    | AAL93816.1  ABC transporter ATP-binding protein       |                |          |      |              |        |       |                |       |        |             |        |  |        |  |
|        | 11 | 25.4%            | 1.000    | 15   | 37.2%      | 1.000    | 15   | 37.0%      | 1.000    | 8    | 20.0%        | 1.000    |                                                       |                |          |      |              |        |       |                |       |        |             |        |  |        |  |
| FN1703 | 17 | 36.1%            | 1.000    | 14   | 32.8%      | 1.000    | 25   | 50.6%      | 1.000    | 20   | 45.8%        | 1.000    | AAL93818.1  ADP-L-glycero-D-manno-heptose-6-epimerase |                |          |      |              |        |       |                |       |        |             |        |  |        |  |
|        | 17 | 34.3%            | 1.000    | 30   | 55.4%      | 1.000    | 23   | 59.9%      | 1.000    | 19   | 41.0%        | 1.000    |                                                       |                |          |      |              |        |       |                |       |        |             |        |  |        |  |
| FN1704 | 9  | 12.9%            | 1.000    | 3    | 3.9%       | 1.000    | 9    | 11.7%      | 1.000    | 4    | 6.4%         | 1.000    | AAL93819.1  Serine protease                           |                |          |      |              |        |       |                |       |        |             |        |  |        |  |
|        | 11 | 16.7%            | 1.000    | 6    | 10.0%      | 1.000    | 8    | 10.4%      | 1.000    | 2    | 4.6%         | 0.993    |                                                       |                |          |      |              |        |       |                |       |        |             |        |  |        |  |
| FN1707 | 4  | 11.0%            | 1.000    | 2    | 3.9%       | 0.855    | 0    | 0.0%       |          | 2    | 6.9%         | 0.999    | AAL93822.1  Aldose 1-epimerase                        |                |          |      |              |        |       |                |       |        |             |        |  |        |  |
|        | 3  | 9.0%             | 1.000    | 0    | 0.0%       | 0.000    | 0    | 0.0%       |          | 2    | 9.3%         | 0.856    |                                                       |                |          |      |              |        |       |                |       |        |             |        |  |        |  |
| FN1708 | 56 | 62.2%            | 1.000    | 39   | 48.6%      | 1.000    | 57   | 60.9%      | 1.000    | 47   | 59.9%        | 1.000    | AAL93823.1  Polyribonucleotide nucleotidyltransferase |                |          |      |              |        |       |                |       |        |             |        |  |        |  |
|        | 58 | 66.7%            | 1.000    | 56   | 67.0%      | 1.000    | 54   | 62.4%      | 1.000    | 48   | 55.8%        | 1.000    |                                                       |                |          |      |              |        |       |                |       |        |             |        |  |        |  |
| FN1711 | 4  | 10.8%            | 1.000    | 2    | 8.6%       | 0.910    | 0    | 0.0%       | 0.000    | 3    | 13.4%        | 0.987    | AAL93826.1  Methyltransferase                         |                |          |      |              |        |       |                |       |        |             |        |  |        |  |
|        | 3  | 12.4%            | 1.000    | 2    | 5.7%       | 0.615    | 1    | 3.5%       | 0.625    | 3    | 12.7%        | 0.824    |                                                       |                |          |      |              |        |       |                |       |        |             |        |  |        |  |
| FN1713 | 2  | 6.0%             | 0.733    | 1    | 3.4%       | 0.692    | 7    | 16.4%      | 1.000    | 1    | 1.7%         | 0.679    | AAL93828.1  tRNA (Uracil-5-) -methyltransferase       |                |          |      |              |        |       |                |       |        |             |        |  |        |  |
|        | 3  | 9.5%             | 0.955    | 5    | 15.7%      | 1.000    | 9    | 22.6%      | 1.000    | 2    | 5.6%         | 0.703    |                                                       |                |          |      |              |        |       |                |       |        |             |        |  |        |  |
| FN1715 | 2  | 4.2%             | 0.826    | 0    | 0.0%       | 0.000    | 5    | 17.0%      | 1.000    | 1    | 2.3%         | 0.919    | AAL93830.1  ATPase                                    |                |          |      |              |        |       |                |       |        |             |        |  |        |  |
|        | 2  | 8.1%             | 0.989    | 3    | 8.8%       | 0.990    | 5    | 16.3%      | 1.000    | 0    | 0.0%         | 0.000    |                                                       |                |          |      |              |        |       |                |       |        |             |        |  |        |  |
| FN1716 | 1  | 7.9%             | 0.889    | 0    | 0.0%       | 0.000    | 2    | 16.4%      | 0.875    | 1    | 3.7%         | 0.387    | AAL93831.1  Hypothetical protein                      |                |          |      |              |        |       |                |       |        |             |        |  |        |  |
|        | 0  | 0.0%             | 0.000    | 1    | 10.1%      | 0.846    | 3    | 22.2%      | 0.979    | 0    | 0.0%         | 0.000    |                                                       |                |          |      |              |        |       |                |       |        |             |        |  |        |  |

Show detected proteins only  
 Show all proteins  
 Filter by category:

Proteins found:  
 1424

Enter (or paste) list of ORFs

| ORF    | Fn Summary Table |          |       | FnPg vs Fn |          |       | FnSg vs Fn |          |       | FnPgSg vs Fn |          |       | FnPgSg vs FnPg                                      |          |      | FnSg vs FnPg |       |        | FnPgSg vs FnSg |        |       | Fn Coverage |        |        |  |
|--------|------------------|----------|-------|------------|----------|-------|------------|----------|-------|--------------|----------|-------|-----------------------------------------------------|----------|------|--------------|-------|--------|----------------|--------|-------|-------------|--------|--------|--|
|        | Fn               |          |       | FnPg       |          |       | FnSg       |          |       | FnPgSg       |          |       | Description                                         |          |      |              | Fn    |        | FnPg           |        | FnSg  |             | FnPgSg |        |  |
|        | n                | coverage | prob  | n          | coverage | prob  | n          | coverage | prob  | n            | coverage | prob  | n                                                   | coverage | prob | Description  | Rep I | Rep II | Rep I          | Rep II | Rep I | Rep II      | Rep I  | Rep II |  |
| FN1717 | 13               | 22.8%    | 1.000 | 6          | 11.8%    | 1.000 | 7          | 12.8%    | 1.000 | 9            | 15.9%    | 1.000 | AAL93832.1  NAD-dependent DNA ligase                |          |      |              |       |        |                |        |       |             |        |        |  |
|        | 16               | 28.2%    | 1.000 | 6          | 12.4%    | 1.000 | 9          | 16.7%    | 1.000 | 7            | 15.7%    | 1.000 |                                                     |          |      |              |       |        |                |        |       |             |        |        |  |
| FN1718 | 54               | 48.9%    | 1.000 | 28         | 40.4%    | 1.000 | 54         | 62.8%    | 1.000 | 49           | 50.2%    | 1.000 | AAL93833.1  Protein translocase subunit secA        |          |      |              |       |        |                |        |       |             |        |        |  |
|        | 58               | 52.7%    | 1.000 | 55         | 59.1%    | 1.000 | 53         | 62.8%    | 1.000 | 48           | 54.5%    | 1.000 |                                                     |          |      |              |       |        |                |        |       |             |        |        |  |
| FN1719 | 33               | 70.3%    | 1.000 | 22         | 58.2%    | 1.000 | 27         | 70.3%    | 1.000 | 32           | 68.6%    | 1.000 | AAL93834.1  Hypothetical protein                    |          |      |              |       |        |                |        |       |             |        |        |  |
|        | 34               | 70.3%    | 1.000 | 27         | 70.3%    | 1.000 | 30         | 70.3%    | 1.000 | 29           | 69.9%    | 1.000 |                                                     |          |      |              |       |        |                |        |       |             |        |        |  |
| FN1722 | 3                | 15.5%    | 1.000 | 2          | 11.2%    | 0.997 | 3          | 25.0%    | 0.999 | 0            | 0.0%     |       | AAL93837.1  Glucose inhibited division protein B    |          |      |              |       |        |                |        |       |             |        |        |  |
|        | 4                | 18.5%    | 1.000 | 0          | 0.0%     | 0.000 | 3          | 14.7%    | 1.000 | 0            | 0.0%     |       |                                                     |          |      |              |       |        |                |        |       |             |        |        |  |
| FN1723 | 17               | 24.5%    | 1.000 | 12         | 27.0%    | 1.000 | 22         | 33.6%    | 1.000 | 19           | 31.6%    | 1.000 | AAL93838.1  Glucose inhibited division protein A    |          |      |              |       |        |                |        |       |             |        |        |  |
|        | 21               | 27.5%    | 1.000 | 19         | 33.6%    | 1.000 | 20         | 35.1%    | 1.000 | 20           | 34.8%    | 1.000 |                                                     |          |      |              |       |        |                |        |       |             |        |        |  |
| FN1724 | 3                | 12.4%    | 1.000 | 3          | 17.9%    | 1.000 | 4          | 17.9%    | 1.000 | 4            | 21.6%    | 1.000 | AAL93839.1  Potassium uptake protein KtrA           |          |      |              |       |        |                |        |       |             |        |        |  |
|        | 2                | 10.6%    | 1.000 | 9          | 41.7%    | 1.000 | 8          | 28.9%    | 1.000 | 3            | 14.7%    | 0.999 |                                                     |          |      |              |       |        |                |        |       |             |        |        |  |
| FN1727 | 0                | 0.0%     |       | 0          | 0.0%     | 0.000 | 4          | 9.4%     | 0.919 | 3            | 9.8%     | 0.996 | AAL93842.1  Chloride channel protein                |          |      |              |       |        |                |        |       |             |        |        |  |
|        | 0                | 0.0%     |       | 1          | 3.3%     | 0.517 | 1          | 6.3%     | 0.299 | 3            | 8.6%     | 0.998 |                                                     |          |      |              |       |        |                |        |       |             |        |        |  |
| FN1728 | 8                | 40.2%    | 1.000 | 7          | 46.3%    | 1.000 | 4          | 18.2%    | 1.000 | 4            | 25.7%    | 1.000 | AAL93843.1  Pyrrolidone-carboxylate peptidase       |          |      |              |       |        |                |        |       |             |        |        |  |
|        | 6                | 36.0%    | 1.000 | 10         | 46.7%    | 1.000 | 5          | 22.0%    | 1.000 | 3            | 21.0%    | 1.000 |                                                     |          |      |              |       |        |                |        |       |             |        |        |  |
| FN1730 | 6                | 13.9%    | 1.000 | 5          | 7.5%     | 1.000 | 6          | 17.2%    | 1.000 | 1            | 2.9%     | 0.989 | AAL93845.1  Para-aminobenzoate synthase component I |          |      |              |       |        |                |        |       |             |        |        |  |
|        | 6                | 10.2%    | 1.000 | 11         | 24.5%    | 1.000 | 10         | 22.1%    | 1.000 | 5            | 14.1%    | 1.000 |                                                     |          |      |              |       |        |                |        |       |             |        |        |  |
| FN1731 | 2                | 3.4%     | 0.763 | 3          | 29.1%    | 1.000 | 4          | 33.0%    | 1.000 | 3            | 13.8%    | 0.952 | AAL93846.1  Anthranilate synthase component II      |          |      |              |       |        |                |        |       |             |        |        |  |
|        | 2                | 3.4%     | 0.737 | 3          | 22.2%    | 1.000 | 6          | 34.0%    | 1.000 | 2            | 3.4%     | 0.883 |                                                     |          |      |              |       |        |                |        |       |             |        |        |  |
| FN1732 | 8                | 28.3%    | 1.000 | 5          | 15.1%    | 1.000 | 9          | 34.7%    | 1.000 | 7            | 30.6%    | 1.000 | AAL93847.1  Hypothetical protein                    |          |      |              |       |        |                |        |       |             |        |        |  |
|        | 5                | 23.4%    | 1.000 | 13         | 55.1%    | 1.000 | 11         | 41.9%    | 1.000 | 5            | 22.6%    | 1.000 |                                                     |          |      |              |       |        |                |        |       |             |        |        |  |
| FN1733 | 1                | 6.2%     | 0.975 | 2          | 19.4%    | 0.998 | 4          | 23.2%    | 1.000 | 1            | 6.2%     | 0.984 | AAL93848.1  V-type sodium ATP synthase subunit D    |          |      |              |       |        |                |        |       |             |        |        |  |
|        | 1                | 6.2%     | 0.979 | 3          | 18.0%    | 0.998 | 7          | 40.8%    | 1.000 | 2            | 10.0%    | 0.999 |                                                     |          |      |              |       |        |                |        |       |             |        |        |  |
| FN1734 | 20               | 52.0%    | 1.000 | 20         | 40.8%    | 1.000 | 24         | 63.5%    | 1.000 | 20           | 46.3%    | 1.000 | AAL93849.1  V-type sodium ATP synthase subunit B    |          |      |              |       |        |                |        |       |             |        |        |  |
|        | 21               | 53.9%    | 1.000 | 28         | 66.2%    | 1.000 | 27         | 63.3%    | 1.000 | 24           | 53.3%    | 1.000 |                                                     |          |      |              |       |        |                |        |       |             |        |        |  |
| FN1735 | 15               | 38.7%    | 1.000 | 12         | 36.4%    | 1.000 | 20         | 58.6%    | 1.000 | 14           | 53.4%    | 1.000 | AAL93850.1  V-type sodium ATP synthase subunit A    |          |      |              |       |        |                |        |       |             |        |        |  |
|        | 15               | 47.1%    | 1.000 | 22         | 62.8%    | 1.000 | 23         | 56.5%    | 1.000 | 11           | 36.1%    | 1.000 |                                                     |          |      |              |       |        |                |        |       |             |        |        |  |
| FN1736 | 6                | 31.7%    | 1.000 | 4          | 27.2%    | 1.000 | 9          | 41.1%    | 1.000 | 4            | 22.8%    | 1.000 | AAL93851.1  V-type sodium ATP synthase subunit A    |          |      |              |       |        |                |        |       |             |        |        |  |
|        | 6                | 31.7%    | 1.000 | 13         | 59.4%    | 1.000 | 7          | 38.6%    | 1.000 | 4            | 20.3%    | 1.000 |                                                     |          |      |              |       |        |                |        |       |             |        |        |  |
| FN1737 | 3                | 41.9%    | 1.000 | 3          | 40.0%    | 1.000 | 3          | 29.5%    | 1.000 | 1            | 15.2%    | 0.989 | AAL93852.1  V-type sodium ATP synthase subunit G    |          |      |              |       |        |                |        |       |             |        |        |  |
|        | 3                | 41.9%    | 1.000 | 3          | 36.2%    | 1.000 | 5          | 61.0%    | 1.000 | 2            | 31.4%    | 0.989 |                                                     |          |      |              |       |        |                |        |       |             |        |        |  |

Show detected proteins only  
 Show all proteins  
 Filter by category:

Proteins found:  
1424

Enter (or paste) list of ORFs

Find ORFs

[Dot Plots](#) [Dot Plots](#)



| ORF    | Fn Summary Table |          |       | FnPg vs Fn |          |       | FnSg vs Fn |          |       | FnPgSg vs Fn |          |       | FnPgSg vs FnPg                                       |          |      | FnSg vs FnPg |       |        | FnPgSg vs FnSg |        |       | Fn Coverage |        |        |  |
|--------|------------------|----------|-------|------------|----------|-------|------------|----------|-------|--------------|----------|-------|------------------------------------------------------|----------|------|--------------|-------|--------|----------------|--------|-------|-------------|--------|--------|--|
|        | Fn               |          |       | FnPg       |          |       | FnSg       |          |       | FnPgSg       |          |       | Description                                          |          |      |              | Fn    |        | FnPg           |        | FnSg  |             | FnPgSg |        |  |
|        | n                | coverage | prob  | n          | coverage | prob  | n          | coverage | prob  | n            | coverage | prob  | n                                                    | coverage | prob | Description  | Rep I | Rep II | Rep I          | Rep II | Rep I | Rep II      | Rep I  | Rep II |  |
| FN1738 | 7                | 21.3%    | 1.000 | 14         | 29.9%    | 1.000 | 17         | 44.0%    | 1.000 | 4            | 12.3%    | 1.000 | AAL93853.1  V-type sodium ATP synthase subunit C     |          |      |              |       |        |                |        |       |             |        |        |  |
|        | 7                | 18.0%    | 1.000 | 18         | 49.4%    | 1.000 | 22         | 59.6%    | 1.000 | 7            | 18.0%    | 1.000 |                                                      |          |      |              |       |        |                |        |       |             |        |        |  |
| FN1739 | 2                | 21.3%    | 0.975 | 3          | 29.0%    | 1.000 | 3          | 29.0%    | 1.000 | 3            | 20.2%    | 1.000 | AAL93854.1  V-type sodium ATP synthase subunit E     |          |      |              |       |        |                |        |       |             |        |        |  |
|        | 3                | 28.4%    | 1.000 | 5          | 32.8%    | 1.000 | 2          | 21.3%    | 0.999 | 5            | 25.1%    | 1.000 |                                                      |          |      |              |       |        |                |        |       |             |        |        |  |
| FN1740 | 1                | 11.9%    | 0.981 | 2          | 11.9%    | 0.991 | 2          | 23.1%    | 1.000 | 2            | 23.1%    | 0.996 | AAL93855.1  V-type sodium ATP synthase subunit K     |          |      |              |       |        |                |        |       |             |        |        |  |
|        | 1                | 11.9%    | 0.982 | 3          | 25.0%    | 1.000 | 3          | 39.4%    | 1.000 | 1            | 11.9%    | 0.986 |                                                      |          |      |              |       |        |                |        |       |             |        |        |  |
| FN1741 | 4                | 11.0%    | 1.000 | 9          | 13.0%    | 1.000 | 12         | 26.6%    | 1.000 | 6            | 14.6%    | 1.000 | AAL93856.1  V-type sodium ATP synthase subunit I     |          |      |              |       |        |                |        |       |             |        |        |  |
|        | 6                | 11.4%    | 1.000 | 12         | 25.5%    | 1.000 | 11         | 24.8%    | 1.000 | 6            | 14.7%    | 1.000 |                                                      |          |      |              |       |        |                |        |       |             |        |        |  |
| FN1742 | 2                | 25.0%    | 0.999 | 3          | 25.0%    | 1.000 | 2          | 25.0%    | 0.983 | 2            | 24.1%    | 0.989 | AAL93857.1  V-type sodium ATP synthase subunit G     |          |      |              |       |        |                |        |       |             |        |        |  |
|        | 1                | 8.3%     | 0.975 | 4          | 34.3%    | 1.000 | 0          | 0.0%     | 0.000 | 2            | 25.0%    | 0.998 |                                                      |          |      |              |       |        |                |        |       |             |        |        |  |
| FN1743 | 1                | 4.5%     | 0.930 | 1          | 4.5%     | 0.863 | 1          | 4.5%     | 0.520 | 1            | 3.4%     | 0.910 | AAL93858.1  Multidrug-efflux transporter 2 regulator |          |      |              |       |        |                |        |       |             |        |        |  |
|        | 1                | 8.2%     | 0.561 | 5          | 20.5%    | 1.000 | 2          | 7.5%     | 0.926 | 1            | 3.4%     | 0.951 |                                                      |          |      |              |       |        |                |        |       |             |        |        |  |
| FN1745 | 3                | 15.2%    | 1.000 | 2          | 13.9%    | 0.849 | 9          | 34.3%    | 1.000 | 5            | 21.0%    | 1.000 | AAL93860.1  Cystathionine gamma-synthase             |          |      |              |       |        |                |        |       |             |        |        |  |
|        | 3                | 13.6%    | 1.000 | 8          | 30.1%    | 1.000 | 11         | 41.4%    | 1.000 | 3            | 12.9%    | 1.000 |                                                      |          |      |              |       |        |                |        |       |             |        |        |  |
| FN1746 | 1                | 2.9%     | 0.928 | 1          | 4.3%     | 0.851 | 7          | 19.3%    | 1.000 | 0            | 0.0%     | 0.000 | AAL93861.1  Cystathionine beta-lyase                 |          |      |              |       |        |                |        |       |             |        |        |  |
|        | 0                | 0.0%     | 0.000 | 5          | 12.6%    | 1.000 | 7          | 19.8%    | 1.000 | 2            | 6.7%     | 0.987 |                                                      |          |      |              |       |        |                |        |       |             |        |        |  |
| FN1752 | 0                | 0.0%     |       | 0          | 0.0%     | 0.000 | 0          | 0.0%     |       | 3            | 15.0%    | 0.846 | AAL93867.1  Regulatory protein TEN1                  |          |      |              |       |        |                |        |       |             |        |        |  |
|        | 0                | 0.0%     |       | 1          | 4.4%     | 0.403 | 0          | 0.0%     |       | 1            | 7.8%     | 0.388 |                                                      |          |      |              |       |        |                |        |       |             |        |        |  |
| FN1754 | 0                | 0.0%     |       | 3          | 21.8%    | 1.000 | 0          | 0.0%     | 0.000 | 1            | 6.2%     | 0.585 | AAL93869.1  Thiazole biosynthesis protein thiG       |          |      |              |       |        |                |        |       |             |        |        |  |
|        | 0                | 0.0%     |       | 1          | 11.7%    | 0.305 | 1          | 4.7%     | 0.419 | 0            | 0.0%     | 0.000 |                                                      |          |      |              |       |        |                |        |       |             |        |        |  |
| FN1762 | 1                | 4.4%     | 0.889 | 0          | 0.0%     | 0.000 | 3          | 21.0%    | 0.984 | 1            | 8.1%     | 0.356 | AAL93875.1  Protein yaaA                             |          |      |              |       |        |                |        |       |             |        |        |  |
|        | 2                | 4.4%     | 0.906 | 1          | 3.2%     | 0.656 | 2          | 13.7%    | 0.998 | 0            | 0.0%     | 0.000 |                                                      |          |      |              |       |        |                |        |       |             |        |        |  |
| FN1763 | 7                | 31.0%    | 1.000 | 8          | 42.9%    | 1.000 | 10         | 55.4%    | 1.000 | 2            | 13.6%    | 1.000 | AAL93876.1  Hypothetical cytosolic protein           |          |      |              |       |        |                |        |       |             |        |        |  |
|        | 5                | 15.2%    | 1.000 | 10         | 52.7%    | 1.000 | 10         | 39.7%    | 1.000 | 3            | 19.6%    | 1.000 |                                                      |          |      |              |       |        |                |        |       |             |        |        |  |
| FN1764 | 59               | 81.8%    | 1.000 | 40         | 71.7%    | 1.000 | 59         | 83.2%    | 1.000 | 46           | 76.3%    | 1.000 | AAL93877.1  Enolase                                  |          |      |              |       |        |                |        |       |             |        |        |  |
|        | 60               | 86.6%    | 1.000 | 70         | 92.6%    | 1.000 | 60         | 87.8%    | 1.000 | 47           | 77.2%    | 1.000 |                                                      |          |      |              |       |        |                |        |       |             |        |        |  |
| FN1765 | 51               | 72.4%    | 1.000 | 24         | 49.9%    | 1.000 | 40         | 73.7%    | 1.000 | 43           | 65.5%    | 1.000 | AAL93878.1  Pyruvate kinase                          |          |      |              |       |        |                |        |       |             |        |        |  |
|        | 46               | 70.9%    | 1.000 | 41         | 67.6%    | 1.000 | 37         | 70.9%    | 1.000 | 43           | 65.5%    | 1.000 |                                                      |          |      |              |       |        |                |        |       |             |        |        |  |
| FN1780 | 8                | 32.4%    | 1.000 | 3          | 20.2%    | 1.000 | 6          | 30.0%    | 1.000 | 8            | 29.6%    | 1.000 | AAL93879.1  Hypothetical protein                     |          |      |              |       |        |                |        |       |             |        |        |  |
|        | 9                | 32.4%    | 1.000 | 8          | 30.4%    | 1.000 | 5          | 25.5%    | 1.000 | 8            | 32.4%    | 1.000 |                                                      |          |      |              |       |        |                |        |       |             |        |        |  |
| FN1781 | 41               | 31.6%    | 1.000 | 32         | 31.6%    | 1.000 | 41         | 41.0%    | 1.000 | 44           | 35.9%    | 1.000 | AAL93880.1  LytB protein                             |          |      |              |       |        |                |        |       |             |        |        |  |
|        | 40               | 34.3%    | 1.000 | 45         | 38.5%    | 1.000 | 46         | 43.8%    | 1.000 | 45           | 36.6%    | 1.000 |                                                      |          |      |              |       |        |                |        |       |             |        |        |  |

Show detected proteins only  
 Show all proteins  
 Filter by category:

Proteins found:  
 1424

Enter (or paste) list of ORFs

| ORF    | Fn Summary Table |          |       | FnPg vs Fn |          |       | FnSg vs Fn |          |       | FnPgSg vs Fn |          |       | FnPgSg vs FnPg                                                           |          |      | FnSg vs FnPg |       |        | FnPgSg vs FnSg |        |       | Fn Coverage |        |        |  |
|--------|------------------|----------|-------|------------|----------|-------|------------|----------|-------|--------------|----------|-------|--------------------------------------------------------------------------|----------|------|--------------|-------|--------|----------------|--------|-------|-------------|--------|--------|--|
|        | Fn               |          |       | FnPg       |          |       | FnSg       |          |       | FnPgSg       |          |       | Description                                                              |          |      |              | Fn    |        | FnPg           |        | FnSg  |             | FnPgSg |        |  |
|        | n                | coverage | prob  | n          | coverage | prob  | n          | coverage | prob  | n            | coverage | prob  | n                                                                        | coverage | prob | Description  | Rep I | Rep II | Rep I          | Rep II | Rep I | Rep II      | Rep I  | Rep II |  |
| FN1783 | 1                | 9.5%     | 0.937 | 2          | 17.2%    | 0.477 | 1          | 9.5%     | 0.985 | 2            | 21.5%    | 0.995 | AAL93882.1  Ethanolamine utilization protein eutJ                        |          |      |              |       |        |                |        |       |             |        |        |  |
|        | 1                | 5.5%     | 0.979 | 5          | 32.1%    | 1.000 | 3          | 19.3%    | 1.000 | 0            | 0.0%     | 0.000 |                                                                          |          |      |              |       |        |                |        |       |             |        |        |  |
| FN1784 | 5                | 27.8%    | 1.000 | 1          | 10.6%    | 0.266 | 5          | 27.8%    | 1.000 | 2            | 10.6%    | 0.999 | AAL93883.1  unknown                                                      |          |      |              |       |        |                |        |       |             |        |        |  |
|        | 5                | 27.8%    | 1.000 | 4          | 27.2%    | 1.000 | 4          | 27.2%    | 1.000 | 3            | 19.2%    | 1.000 |                                                                          |          |      |              |       |        |                |        |       |             |        |        |  |
| FN1785 | 8                | 56.7%    | 1.000 | 1          | 6.4%     | 0.935 | 4          | 33.1%    | 1.000 | 7            | 41.4%    | 1.000 | AAL93884.1  Hypothetical protein                                         |          |      |              |       |        |                |        |       |             |        |        |  |
|        | 6                | 35.7%    | 1.000 | 3          | 14.0%    | 0.991 | 2          | 7.6%     | 0.991 | 8            | 42.0%    | 1.000 |                                                                          |          |      |              |       |        |                |        |       |             |        |        |  |
| FN1786 | 10               | 35.0%    | 1.000 | 3          | 14.9%    | 1.000 | 11         | 40.9%    | 1.000 | 13           | 53.6%    | 1.000 | AAL93885.1  ADP-heptose synthase                                         |          |      |              |       |        |                |        |       |             |        |        |  |
|        | 15               | 53.3%    | 1.000 | 12         | 44.6%    | 1.000 | 12         | 39.3%    | 1.000 | 14           | 50.2%    | 1.000 |                                                                          |          |      |              |       |        |                |        |       |             |        |        |  |
| FN1787 | 26               | 35.0%    | 1.000 | 8          | 14.2%    | 1.000 | 2          | 3.7%     | 0.998 | 20           | 36.5%    | 1.000 | AAL93886.1  Tetratricopeptide repeat family protein                      |          |      |              |       |        |                |        |       |             |        |        |  |
|        | 22               | 37.3%    | 1.000 | 8          | 14.0%    | 1.000 | 8          | 11.3%    | 1.000 | 13           | 26.4%    | 1.000 |                                                                          |          |      |              |       |        |                |        |       |             |        |        |  |
| FN1788 | 9                | 38.8%    | 1.000 | 5          | 30.0%    | 1.000 | 8          | 31.2%    | 1.000 | 11           | 48.1%    | 1.000 | AAL93887.1  2C-methyl-D-erythritol 2,4-cyclodiphosphate synthase         |          |      |              |       |        |                |        |       |             |        |        |  |
|        | 9                | 36.9%    | 1.000 | 11         | 48.1%    | 1.000 | 6          | 33.8%    | 1.000 | 7            | 28.1%    | 1.000 |                                                                          |          |      |              |       |        |                |        |       |             |        |        |  |
| FN1790 | 2                | 7.5%     | 0.998 | 3          | 13.9%    | 1.000 | 8          | 41.0%    | 1.000 | 6            | 34.1%    | 1.000 | AAL93889.1  Cob(I)alamin adenosyltransferase                             |          |      |              |       |        |                |        |       |             |        |        |  |
|        | 3                | 15.6%    | 0.991 | 10         | 51.4%    | 1.000 | 9          | 47.4%    | 1.000 | 3            | 19.1%    | 1.000 |                                                                          |          |      |              |       |        |                |        |       |             |        |        |  |
| FN1791 | 0                | 0.0%     |       | 0          | 0.0%     | 0.000 | 3          | 17.1%    | 1.000 | 1            | 4.4%     | 0.580 | AAL93890.1  Mutator MutT protein                                         |          |      |              |       |        |                |        |       |             |        |        |  |
|        | 0                | 0.0%     |       | 2          | 9.1%     | 0.988 | 4          | 22.2%    | 1.000 | 0            | 0.0%     | 0.000 |                                                                          |          |      |              |       |        |                |        |       |             |        |        |  |
| FN1792 | 15               | 82.6%    | 1.000 | 11         | 75.2%    | 1.000 | 16         | 86.8%    | 1.000 | 22           | 100.0%   | 1.000 | AAL93891.1  Hypothetical protein                                         |          |      |              |       |        |                |        |       |             |        |        |  |
|        | 14               | 75.2%    | 1.000 | 18         | 90.9%    | 1.000 | 16         | 86.8%    | 1.000 | 19           | 86.8%    | 1.000 |                                                                          |          |      |              |       |        |                |        |       |             |        |        |  |
| FN1793 | 18               | 36.4%    | 1.000 | 13         | 27.8%    | 1.000 | 29         | 43.2%    | 1.000 | 19           | 37.3%    | 1.000 | AAL93892.1  Phosphoenolpyruvate-protein phosphotransferase               |          |      |              |       |        |                |        |       |             |        |        |  |
|        | 15               | 28.2%    | 1.000 | 30         | 52.2%    | 1.000 | 27         | 48.5%    | 1.000 | 19           | 35.2%    | 1.000 |                                                                          |          |      |              |       |        |                |        |       |             |        |        |  |
| FN1794 | 8                | 82.8%    | 1.000 | 4          | 56.3%    | 1.000 | 5          | 73.6%    | 1.000 | 7            | 73.6%    | 1.000 | AAL93893.1  Phosphocarrier protein HPr                                   |          |      |              |       |        |                |        |       |             |        |        |  |
|        | 7                | 82.8%    | 1.000 | 5          | 82.8%    | 1.000 | 3          | 56.3%    | 1.000 | 8            | 73.6%    | 1.000 |                                                                          |          |      |              |       |        |                |        |       |             |        |        |  |
| FN1795 | 1                | 5.7%     | 0.946 | 1          | 5.7%     | 0.505 | 2          | 12.2%    | 0.998 | 1            | 6.5%     | 0.561 | AAL93894.1  Hypothetical protein                                         |          |      |              |       |        |                |        |       |             |        |        |  |
|        | 2                | 12.2%    | 0.998 | 1          | 5.7%     | 0.930 | 7          | 27.6%    | 1.000 | 0            | 0.0%     | 0.000 |                                                                          |          |      |              |       |        |                |        |       |             |        |        |  |
| FN1796 | 2                | 24.1%    | 0.983 | 0          | 0.0%     |       | 1          | 25.3%    | 0.937 | 1            | 15.2%    | 0.361 | AAL93895.1  unknown                                                      |          |      |              |       |        |                |        |       |             |        |        |  |
|        | 3                | 25.3%    | 0.989 | 0          | 0.0%     |       | 5          | 49.4%    | 1.000 | 1            | 15.2%    | 0.447 |                                                                          |          |      |              |       |        |                |        |       |             |        |        |  |
| FN1797 | 11               | 37.0%    | 1.000 | 7          | 26.3%    | 1.000 | 13         | 44.7%    | 1.000 | 10           | 36.2%    | 1.000 | AAL93896.1  Spermidine/putrescine transport ATP-binding protein potA     |          |      |              |       |        |                |        |       |             |        |        |  |
|        | 10               | 37.5%    | 1.000 | 13         | 42.8%    | 1.000 | 11         | 39.4%    | 1.000 | 9            | 39.1%    | 1.000 |                                                                          |          |      |              |       |        |                |        |       |             |        |        |  |
| FN1798 | 2                | 10.6%    | 0.998 | 0          | 0.0%     | 0.000 | 3          | 14.4%    | 0.933 | 4            | 13.7%    | 1.000 | AAL93897.1  Spermidine/putrescine transport system permease protein potB |          |      |              |       |        |                |        |       |             |        |        |  |
|        | 4                | 21.5%    | 1.000 | 4          | 21.5%    | 1.000 | 5          | 25.4%    | 1.000 | 4            | 18.3%    | 1.000 |                                                                          |          |      |              |       |        |                |        |       |             |        |        |  |
| FN1800 | 19               | 30.7%    | 1.000 | 10         | 19.3%    | 1.000 | 11         | 27.4%    | 1.000 | 14           | 29.9%    | 1.000 | AAL93899.1  Peptidyl-prolyl cis-trans isomerase                          |          |      |              |       |        |                |        |       |             |        |        |  |
|        | 17               | 30.7%    | 1.000 | 12         | 27.4%    | 1.000 | 11         | 29.6%    | 1.000 | 13           | 28.5%    | 1.000 |                                                                          |          |      |              |       |        |                |        |       |             |        |        |  |

Show detected proteins only  
 Show all proteins  
 Filter by category:

Proteins found: 1424

Enter (or paste) list of ORFs

Find ORFs

Dot Plots

| ORF           | Fn Summary Table |          | FnPg vs Fn |       | FnSg vs Fn |       | FnPgSg vs Fn |          | FnPgSg vs FnPg |       | FnSg vs FnPg |       | FnPgSg vs FnSg                                                  |                                                      | Fn Coverage |   | Description | Fn       |      | FnPg  |        | FnSg  |        | FnPgSg |        |       |        |
|---------------|------------------|----------|------------|-------|------------|-------|--------------|----------|----------------|-------|--------------|-------|-----------------------------------------------------------------|------------------------------------------------------|-------------|---|-------------|----------|------|-------|--------|-------|--------|--------|--------|-------|--------|
|               | n                | coverage | prob       | n     | coverage   | prob  | n            | coverage | prob           | n     | coverage     | prob  | n                                                               | coverage                                             | prob        | n |             | coverage | prob | Rep I | Rep II | Rep I | Rep II | Rep I  | Rep II | Rep I | Rep II |
|               | <b>FN1801</b>    | 2        | 13.3%      | 1.000 | 2          | 14.0% | 1.000        | 3        | 14.0%          | 1.000 | 3            | 20.8% | 1.000                                                           | AAL93900.1  Sodium/glutamate symport carrier protein |             |   |             |          |      |       |        |       |        |        |        |       |        |
| <b>FN1803</b> | 3                | 14.3%    | 1.000      | 2     | 6.0%       | 0.777 | 4            | 25.8%    | 1.000          | 3     | 19.8%        | 1.000 | AAL93902.1  Transcriptional regulator, TetR family              |                                                      |             |   |             |          |      |       |        |       |        |        |        |       |        |
| <b>FN1804</b> | 4                | 7.2%     | 1.000      | 0     | 0.0%       | 0.000 | 13           | 27.8%    | 1.000          | 2     | 4.3%         | 0.743 | AAL93903.1  Aminoacyl-histidine dipeptidase                     |                                                      |             |   |             |          |      |       |        |       |        |        |        |       |        |
| <b>FN1807</b> | 21               | 57.6%    | 1.000      | 16    | 54.9%      | 1.000 | 16           | 57.6%    | 1.000          | 20    | 57.6%        | 1.000 | AAL93906.1  Hypothetical protein                                |                                                      |             |   |             |          |      |       |        |       |        |        |        |       |        |
| <b>FN1808</b> | 6                | 38.4%    | 1.000      | 2     | 18.4%      | 0.981 | 3            | 30.4%    | 1.000          | 8     | 38.4%        | 1.000 | AAL93907.1  Hypothetical protein                                |                                                      |             |   |             |          |      |       |        |       |        |        |        |       |        |
| <b>FN1809</b> | 9                | 26.1%    | 1.000      | 3     | 15.5%      | 1.000 | 8            | 31.4%    | 1.000          | 9     | 35.7%        | 1.000 | AAL93908.1  Iron/zinc/copper-binding protein                    |                                                      |             |   |             |          |      |       |        |       |        |        |        |       |        |
| <b>FN1811</b> | 14               | 68.6%    | 1.000      | 3     | 15.7%      | 1.000 | 6            | 44.5%    | 1.000          | 5     | 26.2%        | 1.000 | AAL93910.1  Manganese transport system ATP-binding protein mntA |                                                      |             |   |             |          |      |       |        |       |        |        |        |       |        |
| <b>FN1812</b> | 16               | 58.6%    | 1.000      | 11    | 32.1%      | 1.000 | 10           | 36.1%    | 1.000          | 22    | 69.9%        | 1.000 | AAL93911.1  Manganese-binding protein                           |                                                      |             |   |             |          |      |       |        |       |        |        |        |       |        |
| <b>FN1813</b> | 7                | 16.2%    | 1.000      | 1     | 5.6%       | 0.984 | 3            | 14.9%    | 0.996          | 6     | 28.1%        | 1.000 | AAL93912.1  Manganese-binding protein                           |                                                      |             |   |             |          |      |       |        |       |        |        |        |       |        |
| <b>FN1814</b> | 7                | 32.3%    | 1.000      | 0     | 0.0%       | 0.000 | 4            | 27.6%    | 1.000          | 7     | 40.1%        | 1.000 | AAL93913.1  Hypothetical protein                                |                                                      |             |   |             |          |      |       |        |       |        |        |        |       |        |
| <b>FN1816</b> | 4                | 17.2%    | 1.000      | 3     | 12.4%      | 0.999 | 2            | 8.2%     | 0.996          | 4     | 18.9%        | 1.000 | AAL93915.1  unknown                                             |                                                      |             |   |             |          |      |       |        |       |        |        |        |       |        |
| <b>FN1817</b> | 0                | 0.0%     | 0.000      | 3     | 2.0%       | 0.959 | 0            | 0.0%     | 0.000          | 12    | 6.9%         | 1.000 | AAL93916.1  Hemolysin                                           |                                                      |             |   |             |          |      |       |        |       |        |        |        |       |        |
| <b>FN1819</b> | 4                | 8.1%     | 1.000      | 1     | 3.4%       | 0.337 | 1            | 1.7%     | 0.333          | 1     | 1.7%         | 0.482 | AAL93918.1  Export ABC transporter                              |                                                      |             |   |             |          |      |       |        |       |        |        |        |       |        |
| <b>FN1820</b> | 4                | 12.6%    | 1.000      | 1     | 2.3%       | 0.930 | 2            | 6.7%     | 0.572          | 2     | 4.1%         | 0.956 | AAL93919.1  Export ABC transporter                              |                                                      |             |   |             |          |      |       |        |       |        |        |        |       |        |
| <b>FN1822</b> | 6                | 29.6%    | 1.000      | 1     | 5.3%       | 0.315 | 1            | 6.5%     | 0.290          | 0     | 0.0%         |       | AAL93921.1  Flavodoxin                                          |                                                      |             |   |             |          |      |       |        |       |        |        |        |       |        |
| <b>FN1825</b> | 2                | 14.5%    | 0.718      | 0     | 0.0%       | 0.000 | 1            | 9.0%     | 0.923          | 4     | 24.8%        | 1.000 | AAL93924.1  Hypothetical protein                                |                                                      |             |   |             |          |      |       |        |       |        |        |        |       |        |

Show detected proteins only  
 Show all proteins

Filter by category:

GO: amino acid transport

Proteins found:  
1424

Enter (or  
paste) list  
of ORFs

Find ORFs

Dot Plots Dot Plots

| ORF    | Fn Summary Table |          |       | FnPg vs Fn |          |       | FnSg vs Fn |          |       | FnPgSg vs Fn |          |       | FnPgSg vs FnPg                                              |          |      | FnSg vs FnPg |       |        | FnPgSg vs FnSg |        |       | Fn Coverage |        |        |  |
|--------|------------------|----------|-------|------------|----------|-------|------------|----------|-------|--------------|----------|-------|-------------------------------------------------------------|----------|------|--------------|-------|--------|----------------|--------|-------|-------------|--------|--------|--|
|        | Fn               |          |       | FnPg       |          |       | FnSg       |          |       | FnPgSg       |          |       | Description                                                 |          |      |              | Fn    |        | FnPg           |        | FnSg  |             | FnPgSg |        |  |
|        | n                | coverage | prob  | n          | coverage | prob  | n          | coverage | prob  | n            | coverage | prob  | n                                                           | coverage | prob | Description  | Rep I | Rep II | Rep I          | Rep II | Rep I | Rep II      | Rep I  | Rep II |  |
| FN1826 | 13               | 37.8%    | 1.000 | 9          | 29.3%    | 1.000 | 9          | 23.9%    | 1.000 | 15           | 43.4%    | 1.000 | AAL93925.1  Protease                                        |          |      |              |       |        |                |        |       |             |        |        |  |
|        | 15               | 44.1%    | 1.000 | 12         | 32.0%    | 1.000 | 11         | 36.8%    | 1.000 | 13           | 37.6%    | 1.000 |                                                             |          |      |              |       |        |                |        |       |             |        |        |  |
| FN1827 | 13               | 30.3%    | 1.000 | 9          | 27.6%    | 1.000 | 19         | 50.0%    | 1.000 | 15           | 36.1%    | 1.000 | AAL93926.1  Replicative DNA helicase                        |          |      |              |       |        |                |        |       |             |        |        |  |
|        | 14               | 35.0%    | 1.000 | 20         | 50.4%    | 1.000 | 20         | 49.1%    | 1.000 | 13           | 30.9%    | 1.000 |                                                             |          |      |              |       |        |                |        |       |             |        |        |  |
| FN1828 | 7                | 43.0%    | 1.000 | 6          | 36.2%    | 1.000 | 6          | 43.0%    | 1.000 | 8            | 36.2%    | 1.000 | AAL93927.1  LSU ribosomal protein L9P                       |          |      |              |       |        |                |        |       |             |        |        |  |
|        | 11               | 47.7%    | 1.000 | 5          | 43.0%    | 1.000 | 6          | 43.0%    | 1.000 | 9            | 52.3%    | 1.000 |                                                             |          |      |              |       |        |                |        |       |             |        |        |  |
| FN1830 | 14               | 28.7%    | 1.000 | 11         | 23.6%    | 1.000 | 19         | 37.8%    | 1.000 | 10           | 22.1%    | 1.000 | AAL93929.1  DNA polymerase III subunits gamma and tau       |          |      |              |       |        |                |        |       |             |        |        |  |
|        | 14               | 28.3%    | 1.000 | 19         | 35.7%    | 1.000 | 20         | 36.2%    | 1.000 | 7            | 19.6%    | 1.000 |                                                             |          |      |              |       |        |                |        |       |             |        |        |  |
| FN1831 | 20               | 46.8%    | 1.000 | 16         | 37.5%    | 1.000 | 25         | 48.3%    | 1.000 | 16           | 34.5%    | 1.000 | AAL93930.1  Nitrogen assimilation regulatory protein        |          |      |              |       |        |                |        |       |             |        |        |  |
|        | 21               | 48.9%    | 1.000 | 23         | 48.9%    | 1.000 | 29         | 54.3%    | 1.000 | 13           | 31.0%    | 1.000 |                                                             |          |      |              |       |        |                |        |       |             |        |        |  |
| FN1832 | 1                | 4.3%     | 0.750 | 0          | 0.0%     | 0.000 | 3          | 9.0%     | 0.999 | 3            | 16.7%    | 1.000 | AAL93931.1  TonB protein                                    |          |      |              |       |        |                |        |       |             |        |        |  |
|        | 2                | 11.5%    | 0.978 | 1          | 4.7%     | 0.947 | 2          | 4.7%     | 0.999 | 1            | 4.7%     | 0.330 |                                                             |          |      |              |       |        |                |        |       |             |        |        |  |
| FN1833 | 2                | 25.4%    | 0.999 | 0          | 0.0%     | 0.000 | 2          | 20.2%    | 1.000 | 4            | 38.6%    | 1.000 | AAL93932.1  Biopolymer transport exbD protein               |          |      |              |       |        |                |        |       |             |        |        |  |
|        | 1                | 11.4%    | 0.982 | 4          | 24.6%    | 0.999 | 2          | 20.2%    | 0.998 | 3            | 24.6%    | 1.000 |                                                             |          |      |              |       |        |                |        |       |             |        |        |  |
| FN1834 | 12               | 28.9%    | 1.000 | 6          | 18.2%    | 1.000 | 5          | 33.2%    | 1.000 | 7            | 27.3%    | 1.000 | AAL93933.1  Biopolymer transport exbB protein               |          |      |              |       |        |                |        |       |             |        |        |  |
|        | 11               | 28.9%    | 1.000 | 8          | 32.1%    | 1.000 | 4          | 11.8%    | 1.000 | 9            | 38.0%    | 1.000 |                                                             |          |      |              |       |        |                |        |       |             |        |        |  |
| FN1836 | 36               | 36.3%    | 1.000 | 11         | 15.1%    | 1.000 | 19         | 25.7%    | 1.000 | 31           | 33.1%    | 1.000 | AAL93935.1  Tetratricopeptide repeat family protein         |          |      |              |       |        |                |        |       |             |        |        |  |
|        | 32               | 33.9%    | 1.000 | 27         | 30.2%    | 1.000 | 28         | 32.9%    | 1.000 | 26           | 27.9%    | 1.000 |                                                             |          |      |              |       |        |                |        |       |             |        |        |  |
| FN1838 | 2                | 3.5%     | 0.999 | 1          | 3.5%     | 0.984 | 2          | 4.3%     | 1.000 | 3            | 5.5%     | 1.000 | AAL93937.1  Glycerol uptake facilitator protein             |          |      |              |       |        |                |        |       |             |        |        |  |
|        | 2                | 3.5%     | 1.000 | 4          | 26.8%    | 1.000 | 2          | 4.3%     | 0.998 | 2            | 3.5%     | 1.000 |                                                             |          |      |              |       |        |                |        |       |             |        |        |  |
| FN1839 | 29               | 62.6%    | 1.000 | 33         | 57.5%    | 1.000 | 36         | 78.5%    | 1.000 | 32           | 57.1%    | 1.000 | AAL93938.1  Glycerol kinase                                 |          |      |              |       |        |                |        |       |             |        |        |  |
|        | 27               | 56.1%    | 1.000 | 44         | 78.5%    | 1.000 | 36         | 73.0%    | 1.000 | 36           | 61.4%    | 1.000 |                                                             |          |      |              |       |        |                |        |       |             |        |        |  |
| FN1840 | 6                | 13.9%    | 1.000 | 15         | 29.2%    | 1.000 | 14         | 35.5%    | 1.000 | 12           | 31.6%    | 1.000 | AAL93939.1  Dihydroxyacetone kinase                         |          |      |              |       |        |                |        |       |             |        |        |  |
|        | 6                | 13.9%    | 1.000 | 19         | 46.1%    | 1.000 | 12         | 35.5%    | 1.000 | 12           | 34.0%    | 1.000 |                                                             |          |      |              |       |        |                |        |       |             |        |        |  |
| FN1841 | 5                | 35.1%    | 1.000 | 5          | 34.7%    | 1.000 | 4          | 26.2%    | 1.000 | 9            | 41.1%    | 1.000 | AAL93940.1  Dihydroxyacetone kinase                         |          |      |              |       |        |                |        |       |             |        |        |  |
|        | 5                | 25.2%    | 1.000 | 4          | 20.3%    | 1.000 | 6          | 33.7%    | 1.000 | 9            | 49.0%    | 1.000 |                                                             |          |      |              |       |        |                |        |       |             |        |        |  |
| FN1842 | 6                | 53.7%    | 1.000 | 4          | 43.4%    | 1.000 | 8          | 57.4%    | 1.000 | 7            | 53.7%    | 1.000 | AAL93941.1  Dihydroxyacetone kinase phosphotransfer protein |          |      |              |       |        |                |        |       |             |        |        |  |
|        | 7                | 53.7%    | 1.000 | 9          | 53.7%    | 1.000 | 8          | 53.7%    | 1.000 | 6            | 43.4%    | 1.000 |                                                             |          |      |              |       |        |                |        |       |             |        |        |  |
| FN1843 | 1                | 1.4%     | 0.227 | 3          | 8.3%     | 1.000 | 1          | 3.5%     | 0.981 | 2            | 5.0%     | 0.995 | AAL93942.1  Surface antigen                                 |          |      |              |       |        |                |        |       |             |        |        |  |
|        | 2                | 3.9%     | 0.674 | 0          | 0.0%     | 0.000 | 2          | 4.8%     | 0.990 | 0            | 0.0%     | 0.000 |                                                             |          |      |              |       |        |                |        |       |             |        |        |  |
| FN1844 | 2                | 11.3%    | 0.987 | 0          | 0.0%     | 0.000 | 5          | 38.9%    | 1.000 | 1            | 11.3%    | 0.458 | AAL93943.1  Ketoacyl reductase hetN                         |          |      |              |       |        |                |        |       |             |        |        |  |
|        | 4                | 23.0%    | 1.000 | 3          | 17.9%    | 0.997 | 2          | 15.2%    | 0.990 | 0            | 0.0%     | 0.000 |                                                             |          |      |              |       |        |                |        |       |             |        |        |  |

Show detected proteins only  
 Show all proteins  
 Filter by category:

Proteins found:  
 1424

Enter (or paste) list of ORFs

| ORF    | Fn Summary Table |          |       | FnPg vs Fn |          |       | FnSg vs Fn |          |       | FnPgSg vs Fn |          |       | FnPgSg vs FnPg                                                     |          |      | FnSg vs FnPg |       |        | FnPgSg vs FnSg |        |       | Fn Coverage |        |        |  |
|--------|------------------|----------|-------|------------|----------|-------|------------|----------|-------|--------------|----------|-------|--------------------------------------------------------------------|----------|------|--------------|-------|--------|----------------|--------|-------|-------------|--------|--------|--|
|        | Fn               |          |       | FnPg       |          |       | FnSg       |          |       | FnPgSg       |          |       | Description                                                        |          |      |              | Fn    |        | FnPg           |        | FnSg  |             | FnPgSg |        |  |
|        | n                | coverage | prob  | n          | coverage | prob  | n          | coverage | prob  | n            | coverage | prob  | n                                                                  | coverage | prob | Description  | Rep I | Rep II | Rep I          | Rep II | Rep I | Rep II      | Rep I  | Rep II |  |
| FN1847 | 6                | 18.0%    | 1.000 | 3          | 8.2%     | 1.000 | 8          | 23.5%    | 1.000 | 2            | 8.5%     | 0.993 | AAL93946.1   DTDP-4-dehydrorhamnose 3,5-epimerase                  |          |      |              |       |        |                |        |       |             |        |        |  |
|        | 3                | 11.0%    | 0.999 | 14         | 47.6%    | 1.000 | 13         | 43.9%    | 1.000 | 0            | 0.0%     | 0.000 |                                                                    |          |      |              |       |        |                |        |       |             |        |        |  |
| FN1848 | 1                | 5.7%     | 0.292 | 1          | 5.7%     | 0.410 | 2          | 9.5%     | 0.641 | 1            | 6.1%     | 0.332 | AAL93947.1   Metal dependent hydrolase                             |          |      |              |       |        |                |        |       |             |        |        |  |
|        | 0                | 0.0%     | 0.000 | 4          | 21.7%    | 0.996 | 2          | 10.3%    | 0.992 | 3            | 14.8%    | 0.991 |                                                                    |          |      |              |       |        |                |        |       |             |        |        |  |
| FN1849 | 6                | 25.0%    | 1.000 | 2          | 5.9%     | 0.750 | 12         | 33.5%    | 1.000 | 4            | 11.6%    | 0.971 | AAL93948.1   Coenzyme F390 synthetase                              |          |      |              |       |        |                |        |       |             |        |        |  |
|        | 3                | 11.6%    | 1.000 | 11         | 29.7%    | 1.000 | 17         | 42.0%    | 1.000 | 2            | 5.4%     | 0.998 |                                                                    |          |      |              |       |        |                |        |       |             |        |        |  |
| FN1850 | 3                | 13.9%    | 0.994 | 1          | 8.4%     | 0.359 | 6          | 38.2%    | 1.000 | 1            | 3.9%     | 0.988 | AAL93949.1   3-oxoacyl-[acyl-carrier-protein] synthase III         |          |      |              |       |        |                |        |       |             |        |        |  |
|        | 4                | 20.4%    | 1.000 | 11         | 49.5%    | 1.000 | 11         | 53.1%    | 1.000 | 2            | 3.9%     | 0.990 |                                                                    |          |      |              |       |        |                |        |       |             |        |        |  |
| FN1851 | 14               | 35.0%    | 1.000 | 11         | 30.4%    | 1.000 | 21         | 53.5%    | 1.000 | 13           | 42.6%    | 1.000 | AAL93950.1   Ribonuclease PH                                       |          |      |              |       |        |                |        |       |             |        |        |  |
|        | 16               | 38.9%    | 1.000 | 26         | 63.4%    | 1.000 | 20         | 49.1%    | 1.000 | 13           | 32.9%    | 1.000 |                                                                    |          |      |              |       |        |                |        |       |             |        |        |  |
| FN1852 | 7                | 54.8%    | 1.000 | 4          | 33.3%    | 1.000 | 5          | 34.1%    | 1.000 | 8            | 54.8%    | 1.000 | AAL93951.1   unknown                                               |          |      |              |       |        |                |        |       |             |        |        |  |
|        | 7                | 48.4%    | 1.000 | 6          | 34.1%    | 1.000 | 4          | 23.8%    | 1.000 | 7            | 40.5%    | 1.000 |                                                                    |          |      |              |       |        |                |        |       |             |        |        |  |
| FN1853 | 7                | 47.8%    | 1.000 | 5          | 18.4%    | 1.000 | 3          | 25.0%    | 1.000 | 3            | 24.3%    | 1.000 | AAL93952.1   Methylaspartate mutase                                |          |      |              |       |        |                |        |       |             |        |        |  |
|        | 5                | 41.9%    | 1.000 | 4          | 25.0%    | 1.000 | 6          | 36.8%    | 1.000 | 3            | 24.3%    | 1.000 |                                                                    |          |      |              |       |        |                |        |       |             |        |        |  |
| FN1854 | 12               | 26.6%    | 1.000 | 6          | 19.7%    | 1.000 | 12         | 37.7%    | 1.000 | 11           | 30.3%    | 1.000 | AAL93953.1   Methylaspartate mutase                                |          |      |              |       |        |                |        |       |             |        |        |  |
|        | 12               | 32.5%    | 1.000 | 12         | 36.1%    | 1.000 | 15         | 42.0%    | 1.000 | 6            | 18.2%    | 1.000 |                                                                    |          |      |              |       |        |                |        |       |             |        |        |  |
| FN1855 | 2                | 5.2%     | 0.982 | 2          | 9.5%     | 0.795 | 3          | 10.9%    | 0.996 | 2            | 5.6%     | 0.863 | AAL93954.1   Methylaspartate mutase                                |          |      |              |       |        |                |        |       |             |        |        |  |
|        | 2                | 4.1%     | 0.996 | 3          | 8.9%     | 1.000 | 3          | 8.9%     | 1.000 | 1            | 2.7%     | 0.509 |                                                                    |          |      |              |       |        |                |        |       |             |        |        |  |
| FN1856 | 30               | 66.4%    | 1.000 | 30         | 74.2%    | 1.000 | 29         | 74.2%    | 1.000 | 29           | 68.7%    | 1.000 | AAL93955.1   Butyrate-acetoacetate CoA-transferase subunit B       |          |      |              |       |        |                |        |       |             |        |        |  |
|        | 25               | 62.7%    | 1.000 | 30         | 74.2%    | 1.000 | 27         | 68.7%    | 1.000 | 25           | 66.4%    | 1.000 |                                                                    |          |      |              |       |        |                |        |       |             |        |        |  |
| FN1857 | 31               | 90.3%    | 1.000 | 28         | 89.9%    | 1.000 | 28         | 92.2%    | 1.000 | 29           | 91.7%    | 1.000 | AAL93956.1   Acetoacetate: butyrate/acetate coenzyme A transferase |          |      |              |       |        |                |        |       |             |        |        |  |
|        | 30               | 89.4%    | 1.000 | 30         | 95.9%    | 1.000 | 20         | 88.0%    | 1.000 | 29           | 88.0%    | 1.000 |                                                                    |          |      |              |       |        |                |        |       |             |        |        |  |
| FN1858 | 11               | 14.4%    | 1.000 | 5          | 8.3%     | 1.000 | 1          | 5.5%     | 0.411 | 13           | 14.4%    | 1.000 | AAL93957.1   Short-chain fatty acids transporter                   |          |      |              |       |        |                |        |       |             |        |        |  |
|        | 12               | 14.4%    | 1.000 | 1          | 7.4%     | 0.318 | 1          | 2.0%     | 0.671 | 13           | 14.4%    | 1.000 |                                                                    |          |      |              |       |        |                |        |       |             |        |        |  |
| FN1859 | 40               | 62.0%    | 1.000 | 23         | 48.1%    | 1.000 | 56         | 78.5%    | 1.000 | 43           | 72.0%    | 1.000 | AAL93958.1   Major outer membrane protein                          |          |      |              |       |        |                |        |       |             |        |        |  |
|        | 36               | 57.9%    | 1.000 | 57         | 84.2%    | 1.000 | 45         | 72.8%    | 1.000 | 45           | 60.1%    | 1.000 |                                                                    |          |      |              |       |        |                |        |       |             |        |        |  |
| FN1860 | 6                | 8.2%     | 1.000 | 1          | 3.4%     | 0.984 | 4          | 11.0%    | 1.000 | 5            | 7.8%     | 1.000 | AAL93959.1   NA+/H+ antiporter NHAC                                |          |      |              |       |        |                |        |       |             |        |        |  |
|        | 5                | 8.2%     | 1.000 | 5          | 9.9%     | 1.000 | 4          | 8.0%     | 1.000 | 5            | 7.8%     | 1.000 |                                                                    |          |      |              |       |        |                |        |       |             |        |        |  |
| FN1862 | 21               | 62.4%    | 1.000 | 22         | 64.3%    | 1.000 | 14         | 43.7%    | 1.000 | 21           | 70.7%    | 1.000 | AAL93961.1   L-beta-lysine 5,6-aminomutase beta subunit            |          |      |              |       |        |                |        |       |             |        |        |  |
|        | 19               | 51.3%    | 1.000 | 22         | 78.3%    | 1.000 | 20         | 71.9%    | 1.000 | 20           | 67.3%    | 1.000 |                                                                    |          |      |              |       |        |                |        |       |             |        |        |  |
| FN1863 | 36               | 49.8%    | 1.000 | 37         | 52.1%    | 1.000 | 32         | 54.4%    | 1.000 | 41           | 53.3%    | 1.000 | AAL93962.1   L-beta-lysine 5,6-aminomutase alpha subunit           |          |      |              |       |        |                |        |       |             |        |        |  |
|        | 39               | 49.8%    | 1.000 | 35         | 59.5%    | 1.000 | 32         | 49.8%    | 1.000 | 44           | 56.9%    | 1.000 |                                                                    |          |      |              |       |        |                |        |       |             |        |        |  |

Show detected proteins only  
 Show all proteins  
 Filter by category:

Proteins found:  
 1424

Enter (or paste) list of ORFs

Find ORFs

| ORF    | Fn Summary Table |          |       | FnPg vs Fn |          |       | FnSg vs Fn |          |       | FnPgSg vs Fn |          |       | FnPgSg vs FnPg                                                             |          |      | FnSg vs FnPg |       |        | FnPgSg vs FnSg |        |       | Fn Coverage |        |        |  |
|--------|------------------|----------|-------|------------|----------|-------|------------|----------|-------|--------------|----------|-------|----------------------------------------------------------------------------|----------|------|--------------|-------|--------|----------------|--------|-------|-------------|--------|--------|--|
|        | Fn               |          |       | FnPg       |          |       | FnSg       |          |       | FnPgSg       |          |       | Description                                                                |          |      |              | Fn    |        | FnPg           |        | FnSg  |             | FnPgSg |        |  |
|        | n                | coverage | prob  | n          | coverage | prob  | n          | coverage | prob  | n            | coverage | prob  | n                                                                          | coverage | prob | Description  | Rep I | Rep II | Rep I          | Rep II | Rep I | Rep II      | Rep I  | Rep II |  |
| FN1864 | 7                | 17.7%    | 1.000 | 3          | 8.4%     | 0.999 | 3          | 10.5%    | 0.987 | 12           | 20.5%    | 1.000 | AAL93963.1  DNA mismatch repair protein mutS                               |          |      |              |       |        |                |        |       |             |        |        |  |
|        | 4                | 10.1%    | 1.000 | 4          | 10.3%    | 1.000 | 3          | 8.8%     | 0.999 | 6            | 10.5%    | 1.000 |                                                                            |          |      |              |       |        |                |        |       |             |        |        |  |
| FN1865 | 3                | 11.2%    | 0.993 | 1          | 7.8%     | 0.425 | 1          | 4.4%     | 0.452 | 3            | 11.2%    | 0.999 | AAL93964.1  Hypothetical protein                                           |          |      |              |       |        |                |        |       |             |        |        |  |
|        | 2                | 4.7%     | 0.999 | 1          | 2.5%     | 0.362 | 0          | 0.0%     | 0.000 | 1            | 2.8%     | 0.379 |                                                                            |          |      |              |       |        |                |        |       |             |        |        |  |
| FN1866 | 52               | 83.1%    | 1.000 | 53         | 80.0%    | 1.000 | 43         | 83.3%    | 1.000 | 59           | 83.8%    | 1.000 | AAL93965.1  Lysine 2,3-aminomutase                                         |          |      |              |       |        |                |        |       |             |        |        |  |
|        | 51               | 81.6%    | 1.000 | 48         | 84.7%    | 1.000 | 44         | 80.0%    | 1.000 | 57           | 84.2%    | 1.000 |                                                                            |          |      |              |       |        |                |        |       |             |        |        |  |
| FN1867 | 34               | 61.2%    | 1.000 | 27         | 59.4%    | 1.000 | 27         | 69.9%    | 1.000 | 29           | 58.8%    | 1.000 | AAL93966.1  Zn-dependent alcohol dehydrogenases and related dehydrogenases |          |      |              |       |        |                |        |       |             |        |        |  |
|        | 31               | 62.3%    | 1.000 | 28         | 65.2%    | 1.000 | 22         | 58.8%    | 1.000 | 29           | 61.2%    | 1.000 |                                                                            |          |      |              |       |        |                |        |       |             |        |        |  |
| FN1868 | 18               | 63.6%    | 1.000 | 14         | 43.8%    | 1.000 | 11         | 54.0%    | 1.000 | 16           | 54.8%    | 1.000 | AAL93967.1  Hypothetical cytosolic protein                                 |          |      |              |       |        |                |        |       |             |        |        |  |
|        | 17               | 63.6%    | 1.000 | 12         | 52.2%    | 1.000 | 9          | 36.8%    | 1.000 | 15           | 54.8%    | 1.000 |                                                                            |          |      |              |       |        |                |        |       |             |        |        |  |
| FN1869 | 9                | 62.5%    | 1.000 | 9          | 64.1%    | 1.000 | 7          | 62.5%    | 1.000 | 8            | 38.3%    | 1.000 | AAL93968.1  Hypothetical protein                                           |          |      |              |       |        |                |        |       |             |        |        |  |
|        | 8                | 62.5%    | 1.000 | 7          | 62.5%    | 1.000 | 7          | 62.5%    | 1.000 | 9            | 38.3%    | 1.000 |                                                                            |          |      |              |       |        |                |        |       |             |        |        |  |
| FN1870 | 1                | 6.6%     | 0.981 | 1          | 6.6%     | 0.983 | 1          | 8.3%     | 0.536 | 0            | 0.0%     | 0.000 | AAL93969.1  unknown                                                        |          |      |              |       |        |                |        |       |             |        |        |  |
|        | 4                | 19.4%    | 1.000 | 0          | 0.0%     | 0.000 | 1          | 8.3%     | 0.492 | 3            | 14.0%    | 0.990 |                                                                            |          |      |              |       |        |                |        |       |             |        |        |  |
| FN1871 | 3                | 28.6%    | 1.000 | 0          | 0.0%     | 0.000 | 0          | 0.0%     |       | 0            | 0.0%     | 0.000 | AAL93970.1  unknown                                                        |          |      |              |       |        |                |        |       |             |        |        |  |
|        | 3                | 28.6%    | 1.000 | 1          | 13.1%    | 0.622 | 0          | 0.0%     |       | 1            | 15.5%    | 0.944 |                                                                            |          |      |              |       |        |                |        |       |             |        |        |  |
| FN1872 | 3                | 22.6%    | 1.000 | 0          | 0.0%     | 0.000 | 2          | 20.2%    | 0.967 | 1            | 8.3%     | 0.433 | AAL93971.1  unknown                                                        |          |      |              |       |        |                |        |       |             |        |        |  |
|        | 3                | 22.6%    | 1.000 | 1          | 11.9%    | 0.982 | 3          | 20.2%    | 0.999 | 0            | 0.0%     | 0.000 |                                                                            |          |      |              |       |        |                |        |       |             |        |        |  |
| FN1873 | 8                | 54.5%    | 1.000 | 5          | 39.3%    | 1.000 | 4          | 45.5%    | 1.000 | 6            | 45.5%    | 1.000 | AAL93972.1  Bis(5'-nucleosyl)-tetraphosphatase                             |          |      |              |       |        |                |        |       |             |        |        |  |
|        | 8                | 76.8%    | 1.000 | 6          | 45.5%    | 1.000 | 6          | 45.5%    | 1.000 | 6            | 45.5%    | 1.000 |                                                                            |          |      |              |       |        |                |        |       |             |        |        |  |
| FN1874 | 8                | 40.3%    | 1.000 | 4          | 31.5%    | 1.000 | 4          | 26.2%    | 1.000 | 6            | 26.2%    | 1.000 | AAL93973.1  Ribose 5-phosphate isomerase                                   |          |      |              |       |        |                |        |       |             |        |        |  |
|        | 8                | 40.3%    | 1.000 | 6          | 40.3%    | 1.000 | 5          | 40.3%    | 1.000 | 6            | 40.3%    | 1.000 |                                                                            |          |      |              |       |        |                |        |       |             |        |        |  |
| FN1875 | 8                | 47.0%    | 1.000 | 5          | 35.4%    | 1.000 | 9          | 61.6%    | 1.000 | 10           | 47.0%    | 1.000 | AAL93974.1  Peptidyl-prolyl cis-trans isomerase                            |          |      |              |       |        |                |        |       |             |        |        |  |
|        | 8                | 47.0%    | 1.000 | 10         | 61.6%    | 1.000 | 9          | 42.7%    | 1.000 | 10           | 47.0%    | 1.000 |                                                                            |          |      |              |       |        |                |        |       |             |        |        |  |
| FN1877 | 0                | 0.0%     |       | 1          | 3.8%     | 0.259 | 2          | 7.5%     | 0.982 | 3            | 15.6%    | 0.850 | AAL93976.1  Guanine-hypoxanthine permease                                  |          |      |              |       |        |                |        |       |             |        |        |  |
|        | 0                | 0.0%     |       | 4          | 16.5%    | 0.998 | 1          | 4.1%     | 0.410 | 1            | 7.0%     | 0.347 |                                                                            |          |      |              |       |        |                |        |       |             |        |        |  |
| FN1878 | 4                | 32.3%    | 1.000 | 1          | 9.1%     | 0.429 | 1          | 17.2%    | 0.985 | 3            | 18.2%    | 1.000 | AAL93977.1  unknown                                                        |          |      |              |       |        |                |        |       |             |        |        |  |
|        | 4                | 32.3%    | 1.000 | 1          | 7.1%     | 0.445 | 1          | 7.1%     | 0.952 | 2            | 18.2%    | 0.999 |                                                                            |          |      |              |       |        |                |        |       |             |        |        |  |
| FN1879 | 2                | 18.9%    | 0.999 | 1          | 10.0%    | 0.984 | 1          | 7.8%     | 0.554 | 5            | 27.8%    | 1.000 | AAL93978.1  SSU ribosomal protein S20P                                     |          |      |              |       |        |                |        |       |             |        |        |  |
|        | 3                | 18.9%    | 1.000 | 1          | 10.0%    | 0.844 | 0          | 0.0%     | 0.000 | 5            | 27.8%    | 1.000 |                                                                            |          |      |              |       |        |                |        |       |             |        |        |  |
| FN1880 | 11               | 34.4%    | 1.000 | 10         | 52.1%    | 1.000 | 19         | 50.0%    | 1.000 | 9            | 38.5%    | 1.000 | AAL93979.1  Oxygen-insensitive NAD(P)H nitroreductase                      |          |      |              |       |        |                |        |       |             |        |        |  |
|        | 13               | 44.8%    | 1.000 | 22         | 53.1%    | 1.000 | 17         | 49.0%    | 1.000 | 10           | 29.2%    | 1.000 |                                                                            |          |      |              |       |        |                |        |       |             |        |        |  |

Show detected proteins only  
 Show all proteins  
 Filter by category:  
 GO: amino acid transport

Proteins found: 1424

Enter (or paste) list of ORFs

Find ORFs



| ORF    | Fn Summary Table |          |       | FnPg vs Fn |          |       | FnSg vs Fn |          |       | FnPgSg vs Fn |          |       | FnPgSg vs FnPg                                                               |          |      | FnSg vs FnPg |       |        | FnPgSg vs FnSg |        |       | Fn Coverage |        |        |  |
|--------|------------------|----------|-------|------------|----------|-------|------------|----------|-------|--------------|----------|-------|------------------------------------------------------------------------------|----------|------|--------------|-------|--------|----------------|--------|-------|-------------|--------|--------|--|
|        | Fn               |          |       | FnPg       |          |       | FnSg       |          |       | FnPgSg       |          |       | Description                                                                  |          |      |              | Fn    |        | FnPg           |        | FnSg  |             | FnPgSg |        |  |
|        | n                | coverage | prob  | n          | coverage | prob  | n          | coverage | prob  | n            | coverage | prob  | n                                                                            | coverage | prob | Description  | Rep I | Rep II | Rep I          | Rep II | Rep I | Rep II      | Rep I  | Rep II |  |
| FN1881 | 2                | 26.4%    | 0.524 | 0          | 0.0%     | 0.000 | 3          | 17.8%    | 1.000 | 3            | 30.2%    | 1.000 | AAL93980.1   Esterase                                                        |          |      |              |       |        |                |        |       |             |        |        |  |
|        | 0                | 0.0%     | 0.000 | 3          | 17.8%    | 1.000 | 3          | 17.8%    | 1.000 | 2            | 10.9%    | 1.000 |                                                                              |          |      |              |       |        |                |        |       |             |        |        |  |
| FN1884 | 5                | 72.9%    | 1.000 | 6          | 72.9%    | 1.000 | 0          | 0.0%     |       | 7            | 72.9%    | 1.000 | AAL93983.1   unknown                                                         |          |      |              |       |        |                |        |       |             |        |        |  |
|        | 6                | 72.9%    | 1.000 | 1          | 18.6%    | 0.982 | 0          | 0.0%     |       | 6            | 72.9%    | 1.000 |                                                                              |          |      |              |       |        |                |        |       |             |        |        |  |
| FN1890 | 3                | 46.6%    | 1.000 | 4          | 46.6%    | 1.000 | 0          | 0.0%     |       | 4            | 46.6%    | 1.000 | AAL93989.1   Hypothetical protein                                            |          |      |              |       |        |                |        |       |             |        |        |  |
|        | 3                | 46.6%    | 1.000 | 1          | 13.8%    | 0.320 | 0          | 0.0%     |       | 3            | 46.6%    | 1.000 |                                                                              |          |      |              |       |        |                |        |       |             |        |        |  |
| FN1891 | 5                | 14.6%    | 1.000 | 4          | 9.6%     | 1.000 | 9          | 27.6%    | 1.000 | 6            | 19.9%    | 1.000 | AAL93990.1   Glycerophosphoryl diester phosphodiesterase                     |          |      |              |       |        |                |        |       |             |        |        |  |
|        | 4                | 14.6%    | 1.000 | 12         | 29.9%    | 1.000 | 13         | 44.1%    | 1.000 | 6            | 18.8%    | 1.000 |                                                                              |          |      |              |       |        |                |        |       |             |        |        |  |
| FN1893 | 60               | 55.0%    | 1.000 | 29         | 25.2%    | 1.000 | 53         | 41.2%    | 1.000 | 50           | 39.5%    | 1.000 | AAL93991.1   Fusobacterium outer membrane protein family                     |          |      |              |       |        |                |        |       |             |        |        |  |
|        | 59               | 52.1%    | 1.000 | 59         | 47.5%    | 1.000 | 48         | 39.2%    | 1.000 | 42           | 34.1%    | 1.000 |                                                                              |          |      |              |       |        |                |        |       |             |        |        |  |
| FN1895 | 2                | 16.5%    | 0.998 | 0          | 0.0%     | 0.000 | 1          | 21.1%    | 0.952 | 3            | 29.4%    | 1.000 | AAL93994.1   Hypothetical protein                                            |          |      |              |       |        |                |        |       |             |        |        |  |
|        | 2                | 16.5%    | 0.996 | 0          | 0.0%     | 0.000 | 0          | 0.0%     | 0.000 | 1            | 8.3%     | 0.626 |                                                                              |          |      |              |       |        |                |        |       |             |        |        |  |
| FN1898 | 19               | 38.3%    | 1.000 | 4          | 9.7%     | 1.000 | 16         | 34.2%    | 1.000 | 14           | 27.1%    | 1.000 | AAL93997.1   Sugar transport ATP-binding protein                             |          |      |              |       |        |                |        |       |             |        |        |  |
|        | 15               | 33.4%    | 1.000 | 17         | 42.7%    | 1.000 | 22         | 49.7%    | 1.000 | 14           | 34.7%    | 1.000 |                                                                              |          |      |              |       |        |                |        |       |             |        |        |  |
| FN1899 | 17               | 50.2%    | 1.000 | 14         | 47.1%    | 1.000 | 17         | 64.7%    | 1.000 | 13           | 36.5%    | 1.000 | AAL93998.1   Hypothetical lipoprotein                                        |          |      |              |       |        |                |        |       |             |        |        |  |
|        | 18               | 61.3%    | 1.000 | 21         | 71.4%    | 1.000 | 18         | 61.3%    | 1.000 | 12           | 26.9%    | 1.000 |                                                                              |          |      |              |       |        |                |        |       |             |        |        |  |
| FN1901 | 1                | 8.3%     | 0.533 | 1          | 5.1%     | 0.729 | 2          | 16.6%    | 0.959 | 1            | 8.3%     | 0.989 | AAL94000.1   Transcription regulator, CRP family                             |          |      |              |       |        |                |        |       |             |        |        |  |
|        | 1                | 8.3%     | 0.792 | 1          | 11.5%    | 0.730 | 4          | 29.5%    | 1.000 | 0            | 0.0%     | 0.000 |                                                                              |          |      |              |       |        |                |        |       |             |        |        |  |
| FN1902 | 7                | 39.7%    | 1.000 | 6          | 46.6%    | 1.000 | 8          | 47.1%    | 1.000 | 7            | 35.6%    | 1.000 | AAL94001.1   Deoxycytidylate deaminase                                       |          |      |              |       |        |                |        |       |             |        |        |  |
|        | 9                | 55.7%    | 1.000 | 11         | 67.8%    | 1.000 | 7          | 38.5%    | 1.000 | 6            | 29.3%    | 1.000 |                                                                              |          |      |              |       |        |                |        |       |             |        |        |  |
| FN1903 | 16               | 26.5%    | 1.000 | 7          | 11.1%    | 1.000 | 2          | 6.0%     | 0.981 | 31           | 48.3%    | 1.000 | AAL94002.1   Coenzyme A disulfide reductase/ disulfide bond regulator domain |          |      |              |       |        |                |        |       |             |        |        |  |
|        | 17               | 30.1%    | 1.000 | 3          | 7.0%     | 0.987 | 1          | 2.6%     | 0.985 | 28           | 40.7%    | 1.000 |                                                                              |          |      |              |       |        |                |        |       |             |        |        |  |
| FN1905 | 0                | 0.0%     | 0.000 | 2          | 3.4%     | 0.598 | 2          | 2.0%     | 0.704 | 3            | 2.4%     | 0.822 | AAL94004.1   outer membrane protein                                          |          |      |              |       |        |                |        |       |             |        |        |  |
|        | 3                | 2.9%     | 0.920 | 1          | 1.3%     | 0.526 | 3          | 2.2%     | 0.939 | 1            | 0.5%     | 0.652 |                                                                              |          |      |              |       |        |                |        |       |             |        |        |  |
| FN1906 | 31               | 52.7%    | 1.000 | 26         | 55.6%    | 1.000 | 40         | 65.3%    | 1.000 | 41           | 63.4%    | 1.000 | AAL94005.1   Cytosol aminopeptidase                                          |          |      |              |       |        |                |        |       |             |        |        |  |
|        | 36               | 56.1%    | 1.000 | 51         | 73.8%    | 1.000 | 43         | 65.9%    | 1.000 | 31           | 50.4%    | 1.000 |                                                                              |          |      |              |       |        |                |        |       |             |        |        |  |
| FN1908 | 26               | 63.3%    | 1.000 | 24         | 55.5%    | 1.000 | 36         | 70.3%    | 1.000 | 22           | 55.2%    | 1.000 | AAL94007.1   Glycerophosphoryl diester phosphodiesterase                     |          |      |              |       |        |                |        |       |             |        |        |  |
|        | 26               | 63.6%    | 1.000 | 34         | 68.3%    | 1.000 | 35         | 68.3%    | 1.000 | 21           | 59.1%    | 1.000 |                                                                              |          |      |              |       |        |                |        |       |             |        |        |  |
| FN1909 | 16               | 48.8%    | 1.000 | 15         | 47.6%    | 1.000 | 16         | 44.9%    | 1.000 | 13           | 41.9%    | 1.000 | AAL94008.1   UDP-3-O-[3-hydroxymyristoyl] glucosamine N-acyltransferase      |          |      |              |       |        |                |        |       |             |        |        |  |
|        | 20               | 57.5%    | 1.000 | 14         | 40.7%    | 1.000 | 14         | 42.8%    | 1.000 | 14           | 53.6%    | 1.000 |                                                                              |          |      |              |       |        |                |        |       |             |        |        |  |
| FN1910 | 19               | 38.9%    | 1.000 | 16         | 39.5%    | 1.000 | 10         | 31.8%    | 1.000 | 22           | 44.6%    | 1.000 | AAL94009.1   periplasmic protein                                             |          |      |              |       |        |                |        |       |             |        |        |  |
|        | 22               | 49.7%    | 1.000 | 13         | 42.7%    | 1.000 | 10         | 31.8%    | 1.000 | 25           | 55.4%    | 1.000 |                                                                              |          |      |              |       |        |                |        |       |             |        |        |  |

Show detected proteins only  
 Show all proteins  
 Filter by category:

Proteins found:  
 1424

Enter (or paste) list of ORFs

| ORF    | Fn Summary Table |          |       | FnPg vs Fn |          |       | FnSg vs Fn |          |       | FnPgSg vs Fn |          |       | FnPgSg vs FnPg                                                             |          |      | FnSg vs FnPg |          |      | FnPgSg vs FnSg |          |      | Fn Coverage |          |      |       |        |       |        |       |        |       |
|--------|------------------|----------|-------|------------|----------|-------|------------|----------|-------|--------------|----------|-------|----------------------------------------------------------------------------|----------|------|--------------|----------|------|----------------|----------|------|-------------|----------|------|-------|--------|-------|--------|-------|--------|-------|
|        | Fn               |          |       | FnPg       |          |       | FnSg       |          |       | FnPgSg       |          |       | Description                                                                |          |      |              | Fn       |      | FnPg           |          | FnSg |             | FnPgSg   |      |       |        |       |        |       |        |       |
|        | n                | coverage | prob  | n          | coverage | prob  | n          | coverage | prob  | n            | coverage | prob  | n                                                                          | coverage | prob | n            | coverage | prob | n              | coverage | prob | n           | coverage | prob | Rep I | Rep II | Rep I | Rep II | Rep I | Rep II | Rep I |
| FN1911 | 67               | 66.5%    | 1.000 | 42         | 51.5%    | 1.000 | 66         | 71.4%    | 1.000 | 67           | 65.5%    | 1.000 | AAL94010.1   Outer membrane protein                                        |          |      |              |          |      |                |          |      |             |          |      |       |        |       |        |       |        |       |
|        | 66               | 66.4%    | 1.000 | 72         | 71.8%    | 1.000 | 58         | 69.2%    | 1.000 | 70           | 67.0%    | 1.000 |                                                                            |          |      |              |          |      |                |          |      |             |          |      |       |        |       |        |       |        |       |
| FN1912 | 11               | 11.1%    | 1.000 | 4          | 4.0%     | 1.000 | 7          | 7.6%     | 0.999 | 2            | 1.4%     | 0.993 | AAL94011.1   Hypothetical protein                                          |          |      |              |          |      |                |          |      |             |          |      |       |        |       |        |       |        |       |
|        | 10               | 10.6%    | 1.000 | 8          | 8.1%     | 1.000 | 7          | 5.3%     | 1.000 | 4            | 4.1%     | 1.000 |                                                                            |          |      |              |          |      |                |          |      |             |          |      |       |        |       |        |       |        |       |
| FN1913 | 18               | 40.2%    | 1.000 | 8          | 21.3%    | 1.000 | 18         | 36.8%    | 1.000 | 14           | 28.5%    | 1.000 | AAL94012.1   hydrolase (HD superfamily)                                    |          |      |              |          |      |                |          |      |             |          |      |       |        |       |        |       |        |       |
|        | 19               | 35.8%    | 1.000 | 19         | 36.6%    | 1.000 | 22         | 39.2%    | 1.000 | 17           | 36.2%    | 1.000 |                                                                            |          |      |              |          |      |                |          |      |             |          |      |       |        |       |        |       |        |       |
| FN1914 | 4                | 40.9%    | 1.000 | 5          | 61.7%    | 1.000 | 6          | 61.7%    | 1.000 | 3            | 39.1%    | 1.000 | AAL94013.1   Anti-sigma F factor antagonist                                |          |      |              |          |      |                |          |      |             |          |      |       |        |       |        |       |        |       |
|        | 3                | 39.1%    | 1.000 | 5          | 45.2%    | 1.000 | 5          | 61.7%    | 1.000 | 3            | 39.1%    | 1.000 |                                                                            |          |      |              |          |      |                |          |      |             |          |      |       |        |       |        |       |        |       |
| FN1917 | 2                | 7.6%     | 0.998 | 2          | 4.0%     | 1.000 | 3          | 7.6%     | 1.000 | 2            | 6.6%     | 0.833 | AAL94016.1   tRNA delta(2)-isopentenylpyrophosphate transferase            |          |      |              |          |      |                |          |      |             |          |      |       |        |       |        |       |        |       |
|        | 3                | 8.9%     | 0.995 | 4          | 10.2%    | 1.000 | 2          | 4.0%     | 1.000 | 2            | 6.3%     | 0.972 |                                                                            |          |      |              |          |      |                |          |      |             |          |      |       |        |       |        |       |        |       |
| FN1918 | 15               | 32.5%    | 1.000 | 10         | 31.3%    | 1.000 | 19         | 44.4%    | 1.000 | 18           | 44.4%    | 1.000 | AAL94017.1   SPO0B-associated GTP-binding protein                          |          |      |              |          |      |                |          |      |             |          |      |       |        |       |        |       |        |       |
|        | 14               | 32.0%    | 1.000 | 19         | 46.7%    | 1.000 | 21         | 48.1%    | 1.000 | 11           | 29.2%    | 1.000 |                                                                            |          |      |              |          |      |                |          |      |             |          |      |       |        |       |        |       |        |       |
| FN1919 | 11               | 43.8%    | 1.000 | 3          | 12.4%    | 1.000 | 4          | 16.9%    | 1.000 | 6            | 23.3%    | 1.000 | AAL94018.1   Methyltransferase                                             |          |      |              |          |      |                |          |      |             |          |      |       |        |       |        |       |        |       |
|        | 12               | 43.8%    | 1.000 | 4          | 22.1%    | 0.999 | 6          | 26.5%    | 1.000 | 3            | 20.5%    | 1.000 |                                                                            |          |      |              |          |      |                |          |      |             |          |      |       |        |       |        |       |        |       |
| FN1920 | 0                | 0.0%     | 0.000 | 3          | 13.1%    | 0.997 | 1          | 5.0%     | 0.659 | 0            | 0.0%     |       | AAL94019.1   tRNA (5-methylaminomethyl-2-thiouridylate) -methyltransferase |          |      |              |          |      |                |          |      |             |          |      |       |        |       |        |       |        |       |
|        | 1                | 5.5%     | 0.944 | 1          | 5.5%     | 0.597 | 3          | 14.0%    | 0.996 | 0            | 0.0%     |       |                                                                            |          |      |              |          |      |                |          |      |             |          |      |       |        |       |        |       |        |       |
| FN1922 | 7                | 13.7%    | 1.000 | 4          | 6.8%     | 1.000 | 4          | 7.7%     | 1.000 | 2            | 2.7%     | 0.979 | AAL94021.1   Hypothetical protein                                          |          |      |              |          |      |                |          |      |             |          |      |       |        |       |        |       |        |       |
|        | 5                | 11.0%    | 1.000 | 8          | 14.0%    | 1.000 | 6          | 10.3%    | 1.000 | 5            | 8.8%     | 1.000 |                                                                            |          |      |              |          |      |                |          |      |             |          |      |       |        |       |        |       |        |       |
| FN1923 | 4                | 6.9%     | 1.000 | 0          | 0.0%     |       | 0          | 0.0%     | 0.000 | 1            | 2.4%     | 0.851 | AAL94022.1   Adenine-specific methyltransferase                            |          |      |              |          |      |                |          |      |             |          |      |       |        |       |        |       |        |       |
|        | 1                | 2.8%     | 0.472 | 0          | 0.0%     |       | 3          | 7.3%     | 0.996 | 1            | 5.2%     | 0.406 |                                                                            |          |      |              |          |      |                |          |      |             |          |      |       |        |       |        |       |        |       |
| FN1925 | 0                | 0.0%     |       | 0          | 0.0%     | 0.000 | 0          | 0.0%     |       | 0            | 0.0%     |       | AAL94024.1   Arsenical pump membrane protein                               |          |      |              |          |      |                |          |      |             |          |      |       |        |       |        |       |        |       |
|        | 0                | 0.0%     |       | 3          | 9.9%     | 0.979 | 0          | 0.0%     |       | 0            | 0.0%     |       |                                                                            |          |      |              |          |      |                |          |      |             |          |      |       |        |       |        |       |        |       |
| FN1926 | 12               | 36.3%    | 1.000 | 8          | 35.4%    | 1.000 | 13         | 46.6%    | 1.000 | 13           | 48.6%    | 1.000 | AAL94025.1   Nitrogen regulatory IIA protein                               |          |      |              |          |      |                |          |      |             |          |      |       |        |       |        |       |        |       |
|        | 13               | 41.5%    | 1.000 | 18         | 51.4%    | 1.000 | 15         | 46.3%    | 1.000 | 14           | 47.3%    | 1.000 |                                                                            |          |      |              |          |      |                |          |      |             |          |      |       |        |       |        |       |        |       |
| FN1927 | 22               | 26.4%    | 1.000 | 23         | 30.1%    | 1.000 | 45         | 56.6%    | 1.000 | 20           | 28.0%    | 1.000 | AAL94026.1   DEGV protein                                                  |          |      |              |          |      |                |          |      |             |          |      |       |        |       |        |       |        |       |
|        | 22               | 26.7%    | 1.000 | 49         | 60.8%    | 1.000 | 46         | 57.9%    | 1.000 | 23           | 28.4%    | 1.000 |                                                                            |          |      |              |          |      |                |          |      |             |          |      |       |        |       |        |       |        |       |
| FN1928 | 2                | 17.4%    | 1.000 | 1          | 8.2%     | 0.967 | 7          | 31.0%    | 1.000 | 5            | 31.5%    | 1.000 | AAL94027.1   Transcriptional regulator, MerR family                        |          |      |              |          |      |                |          |      |             |          |      |       |        |       |        |       |        |       |
|        | 4                | 27.7%    | 1.000 | 8          | 38.6%    | 1.000 | 8          | 42.4%    | 1.000 | 4            | 22.3%    | 1.000 |                                                                            |          |      |              |          |      |                |          |      |             |          |      |       |        |       |        |       |        |       |
| FN1929 | 8                | 16.9%    | 1.000 | 4          | 17.9%    | 1.000 | 11         | 33.1%    | 1.000 | 10           | 26.6%    | 1.000 | AAL94028.1   Competence-damage protein cinA                                |          |      |              |          |      |                |          |      |             |          |      |       |        |       |        |       |        |       |
|        | 9                | 21.1%    | 1.000 | 15         | 36.8%    | 1.000 | 17         | 43.3%    | 1.000 | 9            | 32.3%    | 1.000 |                                                                            |          |      |              |          |      |                |          |      |             |          |      |       |        |       |        |       |        |       |
| FN1931 | 3                | 3.8%     | 0.945 | 2          | 2.9%     | 0.927 | 1          | 2.1%     | 0.524 | 1            | 1.2%     | 0.381 | AAL94030.1   Protease                                                      |          |      |              |          |      |                |          |      |             |          |      |       |        |       |        |       |        |       |
|        | 3                | 4.7%     | 0.980 | 4          | 7.8%     | 0.999 | 9          | 15.7%    | 1.000 | 0            | 0.0%     | 0.000 |                                                                            |          |      |              |          |      |                |          |      |             |          |      |       |        |       |        |       |        |       |

Show detected proteins only  
 Show all proteins  
 Filter by category:

Proteins found: 1424

| ORF    | Fn Summary Table |          |       | FnPg vs Fn |          |       | FnSg vs Fn |          |       | FnPgSg vs Fn |          |       | FnPgSg vs FnPg                                                         |          |      | FnSg vs FnPg |       |        | FnPgSg vs FnSg |        |       | Fn Coverage |        |        |  |
|--------|------------------|----------|-------|------------|----------|-------|------------|----------|-------|--------------|----------|-------|------------------------------------------------------------------------|----------|------|--------------|-------|--------|----------------|--------|-------|-------------|--------|--------|--|
|        | Fn               |          |       | FnPg       |          |       | FnSg       |          |       | FnPgSg       |          |       | Description                                                            |          |      |              | Fn    |        | FnPg           |        | FnSg  |             | FnPgSg |        |  |
|        | n                | coverage | prob  | n          | coverage | prob  | n          | coverage | prob  | n            | coverage | prob  | n                                                                      | coverage | prob | Description  | Rep I | Rep II | Rep I          | Rep II | Rep I | Rep II      | Rep I  | Rep II |  |
| FN1933 | 6                | 20.7%    | 1.000 | 3          | 7.2%     | 1.000 | 4          | 14.7%    | 1.000 | 9            | 27.1%    | 1.000 | AAL94032.1  Hypothetical protein                                       |          |      |              |       |        |                |        |       |             |        |        |  |
|        | 7                | 25.1%    | 1.000 | 4          | 14.4%    | 0.999 | 8          | 26.5%    | 1.000 | 5            | 16.4%    | 1.000 |                                                                        |          |      |              |       |        |                |        |       |             |        |        |  |
| FN1935 | 4                | 17.7%    | 1.000 | 2          | 10.5%    | 0.990 | 4          | 19.8%    | 1.000 | 3            | 15.6%    | 0.997 | AAL94034.1  Adenine-specific methyltransferase                         |          |      |              |       |        |                |        |       |             |        |        |  |
|        | 5                | 23.1%    | 1.000 | 3          | 16.8%    | 1.000 | 4          | 20.7%    | 1.000 | 0            | 0.0%     | 0.000 |                                                                        |          |      |              |       |        |                |        |       |             |        |        |  |
| FN1939 | 7                | 26.3%    | 1.000 | 1          | 3.1%     | 0.547 | 3          | 9.9%     | 1.000 | 5            | 17.3%    | 1.000 | AAL94038.1  Hypothetical protein                                       |          |      |              |       |        |                |        |       |             |        |        |  |
|        | 7                | 24.1%    | 1.000 | 6          | 19.8%    | 1.000 | 5          | 17.0%    | 1.000 | 5            | 16.7%    | 1.000 |                                                                        |          |      |              |       |        |                |        |       |             |        |        |  |
| FN1941 | 27               | 33.7%    | 1.000 | 34         | 43.9%    | 1.000 | 59         | 60.2%    | 1.000 | 30           | 33.4%    | 1.000 | AAL94040.1  ClpB protein                                               |          |      |              |       |        |                |        |       |             |        |        |  |
|        | 27               | 39.8%    | 1.000 | 61         | 66.4%    | 1.000 | 66         | 67.6%    | 1.000 | 33           | 40.6%    | 1.000 |                                                                        |          |      |              |       |        |                |        |       |             |        |        |  |
| FN1942 | 3                | 17.9%    | 0.987 | 5          | 28.4%    | 1.000 | 2          | 11.8%    | 0.991 | 0            | 0.0%     |       | AAL94041.1  putative DNA-binding protein                               |          |      |              |       |        |                |        |       |             |        |        |  |
|        | 0                | 0.0%     | 0.000 | 0          | 0.0%     | 0.000 | 3          | 17.5%    | 0.999 | 0            | 0.0%     |       |                                                                        |          |      |              |       |        |                |        |       |             |        |        |  |
| FN1943 | 62               | 71.2%    | 1.000 | 78         | 76.9%    | 1.000 | 68         | 86.1%    | 1.000 | 56           | 72.3%    | 1.000 | AAL94042.1  Tryptophanase                                              |          |      |              |       |        |                |        |       |             |        |        |  |
|        | 60               | 72.3%    | 1.000 | 73         | 80.7%    | 1.000 | 69         | 80.9%    | 1.000 | 53           | 63.5%    | 1.000 |                                                                        |          |      |              |       |        |                |        |       |             |        |        |  |
| FN1948 | 1                | 10.9%    | 0.962 | 2          | 22.7%    | 0.992 | 5          | 42.0%    | 1.000 | 0            | 0.0%     | 0.000 | AAL94044.1  Hypothetical protein                                       |          |      |              |       |        |                |        |       |             |        |        |  |
|        | 0                | 0.0%     | 0.000 | 5          | 39.5%    | 1.000 | 5          | 47.1%    | 1.000 | 1            | 12.6%    | 0.810 |                                                                        |          |      |              |       |        |                |        |       |             |        |        |  |
| FN1949 | 5                | 9.7%     | 1.000 | 6          | 14.1%    | 1.000 | 13         | 29.4%    | 1.000 | 2            | 8.7%     | 0.759 | AAL94045.1  Xaa-Pro dipeptidase                                        |          |      |              |       |        |                |        |       |             |        |        |  |
|        | 4                | 6.7%     | 1.000 | 14         | 24.7%    | 1.000 | 14         | 30.5%    | 1.000 | 3            | 8.2%     | 0.999 |                                                                        |          |      |              |       |        |                |        |       |             |        |        |  |
| FN1950 | 23               | 25.3%    | 1.000 | 0          | 0.0%     | 0.000 | 0          | 0.0%     | 0.000 | 2            | 10.5%    | 0.905 | AAL94046.1  Serine protease                                            |          |      |              |       |        |                |        |       |             |        |        |  |
|        | 19               | 21.2%    | 1.000 | 1          | 21.4%    | 0.991 | 1          | 18.7%    | 0.961 | 3            | 13.5%    | 0.991 |                                                                        |          |      |              |       |        |                |        |       |             |        |        |  |
| FN1951 | 3                | 10.9%    | 0.986 | 1          | 20.0%    | 0.630 | 1          | 5.1%     | 0.282 | 0            | 0.0%     |       | AAL94047.1  ATPase associated with chromosome architecture/replication |          |      |              |       |        |                |        |       |             |        |        |  |
|        | 3                | 20.6%    | 0.999 | 2          | 10.9%    | 0.778 | 3          | 17.7%    | 0.993 | 0            | 0.0%     |       |                                                                        |          |      |              |       |        |                |        |       |             |        |        |  |
| FN1956 | 1                | 10.5%    | 0.979 | 1          | 11.3%    | 0.652 | 5          | 20.2%    | 1.000 | 1            | 10.5%    | 0.891 | AAL94052.1  Hypothetical protein                                       |          |      |              |       |        |                |        |       |             |        |        |  |
|        | 1                | 10.5%    | 0.982 | 5          | 20.2%    | 1.000 | 5          | 33.9%    | 1.000 | 2            | 19.4%    | 0.990 |                                                                        |          |      |              |       |        |                |        |       |             |        |        |  |
| FN1964 | 8                | 13.7%    | 1.000 | 8          | 16.5%    | 1.000 | 6          | 14.8%    | 1.000 | 9            | 16.5%    | 1.000 | AAL94054.1  O-linked GLCNAC transferase                                |          |      |              |       |        |                |        |       |             |        |        |  |
|        | 11               | 21.9%    | 1.000 | 5          | 9.7%     | 1.000 | 9          | 17.9%    | 1.000 | 6            | 10.2%    | 1.000 |                                                                        |          |      |              |       |        |                |        |       |             |        |        |  |
| FN1965 | 12               | 31.9%    | 1.000 | 10         | 22.0%    | 1.000 | 9          | 37.1%    | 1.000 | 13           | 42.0%    | 1.000 | AAL94055.1  Tetratricopeptide repeat family protein                    |          |      |              |       |        |                |        |       |             |        |        |  |
|        | 12               | 31.6%    | 1.000 | 15         | 44.6%    | 1.000 | 13         | 44.6%    | 1.000 | 10           | 35.7%    | 1.000 |                                                                        |          |      |              |       |        |                |        |       |             |        |        |  |
| FN1966 | 7                | 51.4%    | 1.000 | 4          | 35.7%    | 1.000 | 6          | 51.4%    | 1.000 | 7            | 51.4%    | 1.000 | AAL94056.1  Hypothetical protein                                       |          |      |              |       |        |                |        |       |             |        |        |  |
|        | 7                | 51.4%    | 1.000 | 5          | 37.1%    | 1.000 | 6          | 51.4%    | 1.000 | 6            | 50.0%    | 1.000 |                                                                        |          |      |              |       |        |                |        |       |             |        |        |  |
| FN1970 | 4                | 19.6%    | 0.999 | 0          | 0.0%     | 0.000 | 0          | 0.0%     | 0.000 | 3            | 8.6%     | 0.928 | AAL94060.1  Hemin-binding periplasmic protein hmuT precursor           |          |      |              |       |        |                |        |       |             |        |        |  |
|        | 3                | 8.6%     | 0.871 | 2          | 8.9%     | 0.732 | 1          | 3.2%     | 0.343 | 1            | 3.2%     | 0.886 |                                                                        |          |      |              |       |        |                |        |       |             |        |        |  |
| FN1971 | 8                | 18.9%    | 1.000 | 1          | 2.1%     | 0.534 | 3          | 7.6%     | 1.000 | 11           | 19.9%    | 1.000 | AAL94061.1  Hemin receptor                                             |          |      |              |       |        |                |        |       |             |        |        |  |
|        | 11               | 16.7%    | 1.000 | 13         | 20.4%    | 1.000 | 4          | 9.4%     | 1.000 | 12           | 22.2%    | 1.000 |                                                                        |          |      |              |       |        |                |        |       |             |        |        |  |

Show detected proteins only  
 Show all proteins  
 Filter by category:  
 GO: amino acid transport

Proteins found: 1424

Enter (or paste) list of ORFs

Find ORFs

| ORF    | Fn Summary Table |          |       | FnPg vs Fn |          |       | FnSg vs Fn |          |       | FnPgSg vs Fn |          |       | FnPgSg vs FnPg                                        |          |      | FnSg vs FnPg |        |       | FnPgSg vs FnSg |       |        | Fn Coverage |        |  |  |
|--------|------------------|----------|-------|------------|----------|-------|------------|----------|-------|--------------|----------|-------|-------------------------------------------------------|----------|------|--------------|--------|-------|----------------|-------|--------|-------------|--------|--|--|
|        | Fn               |          |       | FnPg       |          |       | FnSg       |          |       | FnPgSg       |          |       | Description                                           |          |      |              | Fn     |       | FnPg           |       | FnSg   |             | FnPgSg |  |  |
|        | n                | coverage | prob  | n          | coverage | prob  | n          | coverage | prob  | n            | coverage | prob  | n                                                     | coverage | prob | Rep I        | Rep II | Rep I | Rep II         | Rep I | Rep II | Rep I       | Rep II |  |  |
| FN1972 | 5                | 36.9%    | 1.000 | 2          | 13.1%    | 0.993 | 6          | 60.7%    | 1.000 | 3            | 38.5%    | 1.000 | AAL94062.1  unknown                                   |          |      |              |        |       |                |       |        |             |        |  |  |
|        | 5                | 32.0%    | 1.000 | 7          | 45.1%    | 1.000 | 7          | 62.3%    | 1.000 | 4            | 45.1%    | 1.000 |                                                       |          |      |              |        |       |                |       |        |             |        |  |  |
| FN1973 | 5                | 30.5%    | 1.000 | 8          | 41.4%    | 1.000 | 4          | 27.3%    | 1.000 | 11           | 49.2%    | 1.000 | AAL94063.1  Translation initiation inhibitor          |          |      |              |        |       |                |       |        |             |        |  |  |
|        | 5                | 35.9%    | 1.000 | 4          | 27.3%    | 1.000 | 3          | 21.9%    | 1.000 | 10           | 41.4%    | 1.000 |                                                       |          |      |              |        |       |                |       |        |             |        |  |  |
| FN1974 | 3                | 2.3%     | 1.000 | 1          | 3.1%     | 0.375 | 1          | 1.3%     | 0.974 | 2            | 2.3%     | 0.999 | AAL94064.1  DNA/RNA helicase (DEAD/DEAH BOX family)   |          |      |              |        |       |                |       |        |             |        |  |  |
|        | 7                | 8.3%     | 1.000 | 2          | 3.7%     | 0.845 | 5          | 7.2%     | 1.000 | 1            | 1.5%     | 0.878 |                                                       |          |      |              |        |       |                |       |        |             |        |  |  |
| FN1975 | 27               | 54.0%    | 1.000 | 11         | 24.4%    | 1.000 | 23         | 54.4%    | 1.000 | 23           | 48.9%    | 1.000 | AAL94065.1  ATP-dependent RNA helicase                |          |      |              |        |       |                |       |        |             |        |  |  |
|        | 27               | 55.9%    | 1.000 | 21         | 45.1%    | 1.000 | 22         | 50.6%    | 1.000 | 26           | 53.4%    | 1.000 |                                                       |          |      |              |        |       |                |       |        |             |        |  |  |
| FN1976 | 10               | 45.8%    | 1.000 | 5          | 26.1%    | 0.998 | 14         | 65.8%    | 1.000 | 8            | 34.8%    | 1.000 | AAL94066.1  4-amino-4-deoxychorismate lyase           |          |      |              |        |       |                |       |        |             |        |  |  |
|        | 12               | 42.3%    | 1.000 | 14         | 55.8%    | 1.000 | 13         | 58.7%    | 1.000 | 12           | 43.5%    | 1.000 |                                                       |          |      |              |        |       |                |       |        |             |        |  |  |
| FN1977 | 4                | 8.5%     | 1.000 | 4          | 15.2%    | 1.000 | 4          | 11.8%    | 1.000 | 4            | 8.3%     | 0.995 | AAL94067.1  Cell cycle protein MesJ                   |          |      |              |        |       |                |       |        |             |        |  |  |
|        | 4                | 10.3%    | 0.998 | 2          | 6.5%     | 0.906 | 8          | 22.5%    | 1.000 | 1            | 3.3%     | 0.444 |                                                       |          |      |              |        |       |                |       |        |             |        |  |  |
| FN1978 | 30               | 38.1%    | 1.000 | 7          | 14.6%    | 1.000 | 21         | 32.1%    | 1.000 | 27           | 34.5%    | 1.000 | AAL94068.1  Cell division protein ftsH                |          |      |              |        |       |                |       |        |             |        |  |  |
|        | 30               | 39.5%    | 1.000 | 22         | 31.9%    | 1.000 | 21         | 32.4%    | 1.000 | 26           | 35.9%    | 1.000 |                                                       |          |      |              |        |       |                |       |        |             |        |  |  |
| FN1979 | 7                | 42.4%    | 1.000 | 3          | 42.4%    | 1.000 | 1          | 10.6%    | 0.984 | 7            | 49.4%    | 1.000 | AAL94069.1  SSU ribosomal protein S15P                |          |      |              |        |       |                |       |        |             |        |  |  |
|        | 4                | 41.2%    | 1.000 | 3          | 41.2%    | 1.000 | 1          | 10.6%    | 0.983 | 9            | 49.4%    | 1.000 |                                                       |          |      |              |        |       |                |       |        |             |        |  |  |
| FN1980 | 0                | 0.0%     |       | 0          | 0.0%     | 0.000 | 3          | 10.0%    | 0.983 | 2            | 8.7%     | 0.994 | AAL94070.1  Transporter                               |          |      |              |        |       |                |       |        |             |        |  |  |
|        | 0                | 0.0%     |       | 2          | 6.5%     | 0.989 | 2          | 10.0%    | 0.990 | 3            | 11.1%    | 0.988 |                                                       |          |      |              |        |       |                |       |        |             |        |  |  |
| FN1983 | 24               | 66.5%    | 1.000 | 15         | 48.9%    | 1.000 | 16         | 76.6%    | 1.000 | 28           | 66.5%    | 1.000 | AAL94073.1  Alkyl hydroperoxide reductase C22 protein |          |      |              |        |       |                |       |        |             |        |  |  |
|        | 23               | 62.2%    | 1.000 | 17         | 60.6%    | 1.000 | 14         | 76.6%    | 1.000 | 27           | 66.5%    | 1.000 |                                                       |          |      |              |        |       |                |       |        |             |        |  |  |
| FN1984 | 35               | 57.6%    | 1.000 | 27         | 53.9%    | 1.000 | 25         | 54.5%    | 1.000 | 36           | 59.6%    | 1.000 | AAL94074.1  Thioredoxin reductase                     |          |      |              |        |       |                |       |        |             |        |  |  |
|        | 33               | 55.0%    | 1.000 | 34         | 56.1%    | 1.000 | 27         | 50.8%    | 1.000 | 34           | 60.9%    | 1.000 |                                                       |          |      |              |        |       |                |       |        |             |        |  |  |
| FN1985 | 15               | 39.4%    | 1.000 | 5          | 14.1%    | 1.000 | 14         | 37.4%    | 1.000 | 12           | 37.0%    | 1.000 | AAL94075.1  Inner membrane protein                    |          |      |              |        |       |                |       |        |             |        |  |  |
|        | 14               | 36.1%    | 1.000 | 19         | 48.2%    | 1.000 | 14         | 36.3%    | 1.000 | 14           | 42.3%    | 1.000 |                                                       |          |      |              |        |       |                |       |        |             |        |  |  |
| FN1986 | 40               | 81.5%    | 1.000 | 22         | 51.2%    | 1.000 | 28         | 73.2%    | 1.000 | 26           | 63.4%    | 1.000 | AAL94076.1  Hypothetical protein                      |          |      |              |        |       |                |       |        |             |        |  |  |
|        | 40               | 78.6%    | 1.000 | 28         | 77.1%    | 1.000 | 21         | 58.3%    | 1.000 | 27           | 67.3%    | 1.000 |                                                       |          |      |              |        |       |                |       |        |             |        |  |  |
| FN1987 | 4                | 15.7%    | 1.000 | 4          | 15.3%    | 1.000 | 1          | 5.6%     | 0.827 | 5            | 14.8%    | 1.000 | AAL94077.1  Transcriptional regulator, GntR family    |          |      |              |        |       |                |       |        |             |        |  |  |
|        | 3                | 14.8%    | 0.995 | 1          | 4.6%     | 0.452 | 4          | 14.4%    | 1.000 | 3            | 10.2%    | 1.000 |                                                       |          |      |              |        |       |                |       |        |             |        |  |  |
| FN1988 | 18               | 43.7%    | 1.000 | 22         | 47.6%    | 1.000 | 54         | 75.0%    | 1.000 | 20           | 46.7%    | 1.000 | AAL94078.1  Tyrosine phenol-lyase                     |          |      |              |        |       |                |       |        |             |        |  |  |
|        | 17               | 39.3%    | 1.000 | 44         | 71.3%    | 1.000 | 43         | 72.0%    | 1.000 | 21           | 48.3%    | 1.000 |                                                       |          |      |              |        |       |                |       |        |             |        |  |  |
| FN1989 | 0                | 0.0%     |       | 0          | 0.0%     | 0.000 | 3          | 5.5%     | 1.000 | 0            | 0.0%     |       | AAL94079.1  Sodium-dependent tyrosine transporter     |          |      |              |        |       |                |       |        |             |        |  |  |
|        | 0                | 0.0%     |       | 4          | 5.5%     | 1.000 | 4          | 5.5%     | 1.000 | 0            | 0.0%     |       |                                                       |          |      |              |        |       |                |       |        |             |        |  |  |

Show detected proteins only  
 Show all proteins  
 Filter by category:

Proteins found:  
 1424

Enter (or paste) list of ORFs

| ORF    | Fn Summary Table |          |       | FnPg vs Fn |          |       | FnSg vs Fn |          |       | FnPgSg vs Fn |          |       | FnPgSg vs FnPg                                                  |          |      | FnSg vs FnPg |       |        | FnPgSg vs FnSg |        |       | Fn Coverage |        |        |  |
|--------|------------------|----------|-------|------------|----------|-------|------------|----------|-------|--------------|----------|-------|-----------------------------------------------------------------|----------|------|--------------|-------|--------|----------------|--------|-------|-------------|--------|--------|--|
|        | Fn               |          |       | FnPg       |          |       | FnSg       |          |       | FnPgSg       |          |       | Description                                                     |          |      |              | Fn    |        | FnPg           |        | FnSg  |             | FnPgSg |        |  |
|        | n                | coverage | prob  | n          | coverage | prob  | n          | coverage | prob  | n            | coverage | prob  | n                                                               | coverage | prob | Description  | Rep I | Rep II | Rep I          | Rep II | Rep I | Rep II      | Rep I  | Rep II |  |
| FN1991 | 38               | 74.0%    | 1.000 | 29         | 59.2%    | 1.000 | 35         | 58.3%    | 1.000 | 31           | 62.6%    | 1.000 | AAL94081.1  Glucosamine-1-phosphate acetyltransferase           |          |      |              |       |        |                |        |       |             |        |        |  |
|        | 35               | 72.2%    | 1.000 | 35         | 74.7%    | 1.000 | 34         | 66.6%    | 1.000 | 29           | 62.6%    | 1.000 |                                                                 |          |      |              |       |        |                |        |       |             |        |        |  |
| FN1992 | 22               | 69.3%    | 1.000 | 20         | 60.8%    | 1.000 | 23         | 70.6%    | 1.000 | 26           | 77.2%    | 1.000 | AAL94082.1  Ribose-phosphate pyrophosphokinase                  |          |      |              |       |        |                |        |       |             |        |        |  |
|        | 21               | 51.9%    | 1.000 | 23         | 69.6%    | 1.000 | 22         | 61.7%    | 1.000 | 22           | 59.2%    | 1.000 |                                                                 |          |      |              |       |        |                |        |       |             |        |        |  |
| FN1993 | 3                | 20.3%    | 1.000 | 0          | 0.0%     | 0.000 | 3          | 24.4%    | 0.860 | 2            | 14.7%    | 0.735 | AAL94083.1  SUA5 protein                                        |          |      |              |       |        |                |        |       |             |        |        |  |
|        | 1                | 7.4%     | 0.885 | 5          | 27.6%    | 1.000 | 4          | 24.9%    | 1.000 | 4            | 27.2%    | 1.000 |                                                                 |          |      |              |       |        |                |        |       |             |        |        |  |
| FN1994 | 7                | 34.7%    | 1.000 | 6          | 27.8%    | 1.000 | 7          | 40.3%    | 1.000 | 9            | 50.7%    | 1.000 | AAL94084.1  Hypothetical protein                                |          |      |              |       |        |                |        |       |             |        |        |  |
|        | 7                | 34.7%    | 1.000 | 7          | 50.0%    | 1.000 | 4          | 27.1%    | 0.999 | 6            | 45.8%    | 1.000 |                                                                 |          |      |              |       |        |                |        |       |             |        |        |  |
| FN1995 | 4                | 14.3%    | 1.000 | 1          | 5.5%     | 0.388 | 2          | 6.3%     | 0.857 | 5            | 16.9%    | 1.000 | AAL94085.1  Hypothetical protein                                |          |      |              |       |        |                |        |       |             |        |        |  |
|        | 5                | 21.5%    | 1.000 | 4          | 19.0%    | 0.983 | 2          | 5.9%     | 0.921 | 4            | 13.9%    | 1.000 |                                                                 |          |      |              |       |        |                |        |       |             |        |        |  |
| FN2001 | 3                | 25.3%    | 1.000 | 0          | 0.0%     | 0.000 | 5          | 31.7%    | 1.000 | 2            | 12.4%    | 0.997 | AAL94091.1  Hypothetical protein                                |          |      |              |       |        |                |        |       |             |        |        |  |
|        | 3                | 18.3%    | 1.000 | 5          | 30.6%    | 1.000 | 6          | 32.3%    | 1.000 | 2            | 12.4%    | 0.998 |                                                                 |          |      |              |       |        |                |        |       |             |        |        |  |
| FN2002 | 0                | 0.0%     | 0.000 | 0          | 0.0%     | 0.000 | 0          | 0.0%     | 0.000 | 1            | 3.5%     | 0.564 | AAL94092.1  Permease                                            |          |      |              |       |        |                |        |       |             |        |        |  |
|        | 1                | 6.0%     | 0.362 | 2          | 3.5%     | 0.490 | 3          | 12.8%    | 0.833 | 0            | 0.0%     | 0.000 |                                                                 |          |      |              |       |        |                |        |       |             |        |        |  |
| FN2007 | 8                | 54.3%    | 1.000 | 4          | 13.6%    | 1.000 | 4          | 18.6%    | 1.000 | 4            | 18.6%    | 1.000 | AAL94097.1  Glutathione peroxidase                              |          |      |              |       |        |                |        |       |             |        |        |  |
|        | 6                | 44.7%    | 1.000 | 3          | 18.1%    | 1.000 | 3          | 18.6%    | 1.000 | 5            | 31.7%    | 1.000 |                                                                 |          |      |              |       |        |                |        |       |             |        |        |  |
| FN2008 | 1                | 9.6%     | 0.981 | 0          | 0.0%     | 0.000 | 3          | 28.3%    | 1.000 | 2            | 13.3%    | 0.882 | AAL94098.1  Glycine betaine transport ATP-binding protein       |          |      |              |       |        |                |        |       |             |        |        |  |
|        | 3                | 16.2%    | 0.998 | 6          | 26.7%    | 1.000 | 2          | 15.4%    | 0.999 | 1            | 9.6%     | 0.962 |                                                                 |          |      |              |       |        |                |        |       |             |        |        |  |
| FN2009 | 1                | 2.7%     | 0.958 | 1          | 7.0%     | 0.471 | 4          | 17.5%    | 1.000 | 2            | 9.2%     | 0.824 | AAL94099.1  Glycine betaine transport system permease protein   |          |      |              |       |        |                |        |       |             |        |        |  |
|        | 0                | 0.0%     | 0.000 | 5          | 20.5%    | 1.000 | 6          | 18.1%    | 1.000 | 0            | 0.0%     | 0.000 |                                                                 |          |      |              |       |        |                |        |       |             |        |        |  |
| FN2011 | 37               | 35.2%    | 1.000 | 15         | 21.6%    | 1.000 | 16         | 21.1%    | 1.000 | 27           | 30.7%    | 1.000 | AAL94101.1  Valyl-tRNA synthetase                               |          |      |              |       |        |                |        |       |             |        |        |  |
|        | 36               | 35.6%    | 1.000 | 23         | 26.5%    | 1.000 | 31         | 37.3%    | 1.000 | 30           | 34.4%    | 1.000 |                                                                 |          |      |              |       |        |                |        |       |             |        |        |  |
| FN2013 | 3                | 19.1%    | 0.793 | 2          | 6.2%     | 0.999 | 4          | 16.0%    | 1.000 | 1            | 6.2%     | 0.954 | AAL94103.1  GTP-binding protein                                 |          |      |              |       |        |                |        |       |             |        |        |  |
|        | 1                | 8.8%     | 0.374 | 4          | 20.6%    | 0.942 | 3          | 13.4%    | 1.000 | 1            | 6.2%     | 0.421 |                                                                 |          |      |              |       |        |                |        |       |             |        |        |  |
| FN2014 | 37               | 40.5%    | 1.000 | 18         | 27.6%    | 1.000 | 25         | 36.3%    | 1.000 | 36           | 43.1%    | 1.000 | AAL94104.1  ATP-dependent protease La                           |          |      |              |       |        |                |        |       |             |        |        |  |
|        | 36               | 43.0%    | 1.000 | 34         | 43.9%    | 1.000 | 33         | 40.2%    | 1.000 | 35           | 42.4%    | 1.000 |                                                                 |          |      |              |       |        |                |        |       |             |        |        |  |
| FN2015 | 26               | 58.9%    | 1.000 | 14         | 23.2%    | 1.000 | 27         | 64.5%    | 1.000 | 20           | 43.7%    | 1.000 | AAL94105.1  ATP-dependent clp protease ATP-binding subunit clpX |          |      |              |       |        |                |        |       |             |        |        |  |
|        | 27               | 60.3%    | 1.000 | 26         | 65.5%    | 1.000 | 23         | 38.8%    | 1.000 | 22           | 52.2%    | 1.000 |                                                                 |          |      |              |       |        |                |        |       |             |        |        |  |
| FN2016 | 7                | 35.2%    | 1.000 | 1          | 6.7%     | 0.342 | 5          | 23.3%    | 1.000 | 7            | 32.6%    | 1.000 | AAL94106.1  ATP-dependent Clp protease proteolytic subunit      |          |      |              |       |        |                |        |       |             |        |        |  |
|        | 8                | 38.9%    | 1.000 | 7          | 27.5%    | 1.000 | 3          | 14.5%    | 1.000 | 8            | 32.1%    | 1.000 |                                                                 |          |      |              |       |        |                |        |       |             |        |        |  |
| FN2017 | 49               | 69.5%    | 1.000 | 41         | 61.3%    | 1.000 | 37         | 69.5%    | 1.000 | 55           | 67.1%    | 1.000 | AAL94107.1  Trigger factor, ppiase                              |          |      |              |       |        |                |        |       |             |        |        |  |
|        | 54               | 68.8%    | 1.000 | 48         | 73.2%    | 1.000 | 41         | 72.7%    | 1.000 | 51           | 66.7%    | 1.000 |                                                                 |          |      |              |       |        |                |        |       |             |        |        |  |

Show detected proteins only  
 Show all proteins  
 Filter by category:

Proteins found:  
 1424

Enter (or paste) list of ORFs

| ORF    | Fn Summary Table |          |       | FnPg vs Fn |          |       | FnSg vs Fn |          |       | FnPgSg vs Fn |          |       | FnPgSg vs FnPg                                                       |          |      | FnSg vs FnPg |       |        | FnPgSg vs FnSg |        |       | Fn Coverage |        |        |  |
|--------|------------------|----------|-------|------------|----------|-------|------------|----------|-------|--------------|----------|-------|----------------------------------------------------------------------|----------|------|--------------|-------|--------|----------------|--------|-------|-------------|--------|--------|--|
|        | Fn               |          |       | FnPg       |          |       | FnSg       |          |       | FnPgSg       |          |       | Description                                                          |          |      |              | Fn    |        | FnPg           |        | FnSg  |             | FnPgSg |        |  |
|        | n                | coverage | prob  | n          | coverage | prob  | n          | coverage | prob  | n            | coverage | prob  | n                                                                    | coverage | prob | Description  | Rep I | Rep II | Rep I          | Rep II | Rep I | Rep II      | Rep I  | Rep II |  |
| FN2018 | 12               | 25.0%    | 1.000 | 4          | 10.3%    | 1.000 | 4          | 11.3%    | 1.000 | 11           | 23.9%    | 1.000 | AAL94108.1  Single-stranded-DNA-specific exonuclease recJ            |          |      |              |       |        |                |        |       |             |        |        |  |
|        | 14               | 24.8%    | 1.000 | 4          | 11.3%    | 1.000 | 9          | 24.5%    | 1.000 | 10           | 21.6%    | 1.000 |                                                                      |          |      |              |       |        |                |        |       |             |        |        |  |
| FN2019 | 6                | 47.5%    | 1.000 | 9          | 54.2%    | 1.000 | 2          | 26.7%    | 0.958 | 5            | 35.8%    | 1.000 | AAL94109.1  Ribosome-binding factor A                                |          |      |              |       |        |                |        |       |             |        |        |  |
|        | 6                | 44.2%    | 1.000 | 1          | 12.5%    | 0.967 | 4          | 30.0%    | 1.000 | 6            | 48.3%    | 1.000 |                                                                      |          |      |              |       |        |                |        |       |             |        |        |  |
| FN2020 | 43               | 54.0%    | 1.000 | 32         | 41.0%    | 1.000 | 39         | 52.8%    | 1.000 | 39           | 47.4%    | 1.000 | AAL94110.1  Bacterial Protein Translation Initiation Factor 2 (IF-2) |          |      |              |       |        |                |        |       |             |        |        |  |
|        | 44               | 52.0%    | 1.000 | 49         | 63.5%    | 1.000 | 48         | 59.4%    | 1.000 | 38           | 45.3%    | 1.000 |                                                                      |          |      |              |       |        |                |        |       |             |        |        |  |
| FN2022 | 20               | 43.1%    | 1.000 | 15         | 39.2%    | 1.000 | 20         | 45.9%    | 1.000 | 18           | 42.3%    | 1.000 | AAL94112.1  N utilization substance protein A                        |          |      |              |       |        |                |        |       |             |        |        |  |
|        | 20               | 43.4%    | 1.000 | 18         | 48.7%    | 1.000 | 24         | 50.1%    | 1.000 | 18           | 42.6%    | 1.000 |                                                                      |          |      |              |       |        |                |        |       |             |        |        |  |
| FN2023 | 6                | 37.2%    | 1.000 | 5          | 17.9%    | 1.000 | 6          | 21.8%    | 1.000 | 5            | 26.3%    | 1.000 | AAL94113.1  Hypothetical cytosolic protein                           |          |      |              |       |        |                |        |       |             |        |        |  |
|        | 5                | 37.2%    | 1.000 | 4          | 17.3%    | 1.000 | 8          | 21.8%    | 1.000 | 4            | 24.4%    | 1.000 |                                                                      |          |      |              |       |        |                |        |       |             |        |        |  |
| FN2030 | 14               | 16.2%    | 1.000 | 7          | 10.4%    | 1.000 | 13         | 17.7%    | 1.000 | 22           | 18.9%    | 1.000 | AAL94115.1  Inorganic pyrophosphatase                                |          |      |              |       |        |                |        |       |             |        |        |  |
|        | 14               | 14.5%    | 1.000 | 11         | 14.3%    | 1.000 | 13         | 15.9%    | 1.000 | 21           | 21.8%    | 1.000 |                                                                      |          |      |              |       |        |                |        |       |             |        |        |  |
| FN2031 | 3                | 12.5%    | 1.000 | 3          | 12.2%    | 1.000 | 2          | 13.1%    | 0.997 | 7            | 18.8%    | 1.000 | AAL94116.1  Thiamine biosynthesis lipoprotein apbE                   |          |      |              |       |        |                |        |       |             |        |        |  |
|        | 5                | 22.8%    | 1.000 | 2          | 4.4%     | 0.977 | 3          | 16.6%    | 1.000 | 6            | 17.2%    | 1.000 |                                                                      |          |      |              |       |        |                |        |       |             |        |        |  |
| FN2033 | 6                | 37.8%    | 1.000 | 5          | 37.8%    | 1.000 | 1          | 12.4%    | 0.985 | 1            | 9.2%     | 0.512 | AAL94118.1  Guanylate kinase                                         |          |      |              |       |        |                |        |       |             |        |        |  |
|        | 6                | 37.3%    | 1.000 | 1          | 12.4%    | 0.804 | 4          | 36.8%    | 1.000 | 2            | 14.1%    | 0.761 |                                                                      |          |      |              |       |        |                |        |       |             |        |        |  |
| FN2034 | 6                | 16.4%    | 1.000 | 5          | 19.2%    | 1.000 | 7          | 21.9%    | 1.000 | 11           | 31.8%    | 1.000 | AAL94119.1  Protein yicC                                             |          |      |              |       |        |                |        |       |             |        |        |  |
|        | 9                | 22.9%    | 1.000 | 8          | 31.5%    | 1.000 | 9          | 24.0%    | 1.000 | 11           | 34.9%    | 1.000 |                                                                      |          |      |              |       |        |                |        |       |             |        |        |  |
| FN2035 | 81               | 54.1%    | 1.000 | 57         | 44.0%    | 1.000 | 77         | 54.3%    | 1.000 | 71           | 44.9%    | 1.000 | AAL94120.1  DNA-directed RNA polymerase beta' chain                  |          |      |              |       |        |                |        |       |             |        |        |  |
|        | 71               | 47.6%    | 1.000 | 79         | 52.7%    | 1.000 | 71         | 55.7%    | 1.000 | 70           | 45.0%    | 1.000 |                                                                      |          |      |              |       |        |                |        |       |             |        |        |  |
| FN2036 | 70               | 51.4%    | 1.000 | 36         | 35.1%    | 1.000 | 62         | 55.4%    | 1.000 | 55           | 46.0%    | 1.000 | AAL94121.1  DNA-directed RNA polymerase beta chain                   |          |      |              |       |        |                |        |       |             |        |        |  |
|        | 66               | 47.9%    | 1.000 | 57         | 48.8%    | 1.000 | 67         | 54.5%    | 1.000 | 61           | 52.4%    | 1.000 |                                                                      |          |      |              |       |        |                |        |       |             |        |        |  |
| FN2037 | 13               | 72.1%    | 1.000 | 8          | 57.4%    | 1.000 | 8          | 65.6%    | 1.000 | 15           | 82.0%    | 1.000 | AAL94122.1  LSU ribosomal protein L12P (L7/L12)                      |          |      |              |       |        |                |        |       |             |        |        |  |
|        | 11               | 74.6%    | 1.000 | 9          | 65.6%    | 1.000 | 10         | 75.4%    | 1.000 | 14           | 72.1%    | 1.000 |                                                                      |          |      |              |       |        |                |        |       |             |        |        |  |
| FN2038 | 25               | 71.8%    | 1.000 | 17         | 60.6%    | 1.000 | 16         | 65.9%    | 1.000 | 26           | 73.5%    | 1.000 | AAL94123.1  LSU ribosomal protein L10P                               |          |      |              |       |        |                |        |       |             |        |        |  |
|        | 23               | 70.6%    | 1.000 | 19         | 54.1%    | 1.000 | 20         | 71.8%    | 1.000 | 26           | 70.6%    | 1.000 |                                                                      |          |      |              |       |        |                |        |       |             |        |        |  |
| FN2039 | 22               | 49.4%    | 1.000 | 16         | 38.3%    | 1.000 | 15         | 51.1%    | 1.000 | 21           | 46.4%    | 1.000 | AAL94124.1  LSU ribosomal protein L1P                                |          |      |              |       |        |                |        |       |             |        |        |  |
|        | 21               | 41.7%    | 1.000 | 13         | 46.0%    | 1.000 | 15         | 51.5%    | 1.000 | 24           | 44.7%    | 1.000 |                                                                      |          |      |              |       |        |                |        |       |             |        |        |  |
| FN2040 | 7                | 32.6%    | 1.000 | 3          | 25.5%    | 1.000 | 3          | 22.7%    | 1.000 | 7            | 32.6%    | 1.000 | AAL94125.1  LSU ribosomal protein L11P                               |          |      |              |       |        |                |        |       |             |        |        |  |
|        | 6                | 32.6%    | 1.000 | 4          | 32.6%    | 1.000 | 3          | 22.7%    | 1.000 | 6            | 32.6%    | 1.000 |                                                                      |          |      |              |       |        |                |        |       |             |        |        |  |
| FN2041 | 9                | 55.4%    | 1.000 | 12         | 59.6%    | 1.000 | 9          | 38.9%    | 1.000 | 9            | 49.2%    | 1.000 | AAL94126.1  Transcription antitermination protein nusG               |          |      |              |       |        |                |        |       |             |        |        |  |
|        | 9                | 51.8%    | 1.000 | 10         | 46.6%    | 1.000 | 10         | 40.9%    | 1.000 | 9            | 49.2%    | 1.000 |                                                                      |          |      |              |       |        |                |        |       |             |        |        |  |

 Show detected proteins only  
 Show all proteins

 Filter by category:

 Proteins found:  
 1424

 Enter (or  
 paste) list  
 of ORFs

Find ORFs

Dot Plots Dot Plots



|               | Fn Summary Table |          |       | FnPg vs Fn |          |       | FnSg vs Fn |          |       | FnPgSg vs Fn |          |       | FnPgSg vs FnPg                                          |          |      | FnSg vs FnPg |        |       | FnPgSg vs FnSg |       |        | Fn Coverage |        |  |
|---------------|------------------|----------|-------|------------|----------|-------|------------|----------|-------|--------------|----------|-------|---------------------------------------------------------|----------|------|--------------|--------|-------|----------------|-------|--------|-------------|--------|--|
| ORF           | Fn               |          |       | FnPg       |          |       | FnSg       |          |       | FnPgSg       |          |       | Description                                             |          |      | Fn           |        | FnPg  |                | FnSg  |        | FnPgSg      |        |  |
|               | n                | coverage | prob  | n          | coverage | prob  | n          | coverage | prob  | n            | coverage | prob  | n                                                       | coverage | prob | Rep I        | Rep II | Rep I | Rep II         | Rep I | Rep II | Rep I       | Rep II |  |
| <b>FN2045</b> | 2                | 10.6%    | 0.995 | 1          | 13.4%    | 0.981 | 3          | 31.7%    | 1.000 | 1            | 9.2%     | 0.661 | AAL94129.1  Ferric uptake regulation protein            |          |      |              |        |       |                |       |        |             |        |  |
|               | 0                | 0.0%     | 0.000 | 3          | 26.1%    | 1.000 | 4          | 31.0%    | 1.000 | 0            | 0.0%     | 0.000 |                                                         |          |      |              |        |       |                |       |        |             |        |  |
| <b>FN2046</b> | 1                | 8.1%     | 0.975 | 1          | 9.4%     | 0.984 | 6          | 47.7%    | 1.000 | 0            | 0.0%     | 0.000 | AAL94130.1  Acetyltransferase                           |          |      |              |        |       |                |       |        |             |        |  |
|               | 1                | 7.4%     | 0.967 | 6          | 32.9%    | 1.000 | 4          | 24.2%    | 1.000 | 1            | 8.1%     | 0.986 |                                                         |          |      |              |        |       |                |       |        |             |        |  |
| <b>FN2047</b> | 67               | 55.5%    | 1.000 | 10         | 11.3%    | 1.000 | 29         | 30.2%    | 1.000 | 27           | 24.8%    | 1.000 | AAL94131.1  Fusobacterium outer membrane protein family |          |      |              |        |       |                |       |        |             |        |  |
|               | 65               | 48.8%    | 1.000 | 31         | 28.0%    | 1.000 | 32         | 33.6%    | 1.000 | 32           | 27.4%    | 1.000 |                                                         |          |      |              |        |       |                |       |        |             |        |  |
| <b>FN2048</b> | 15               | 70.2%    |       | 0          | 0.0%     |       | 9          | 70.2%    |       | 16           | 70.2%    |       | AAL94132.1  Outer membrane protein                      |          |      |              |        |       |                |       |        |             |        |  |
|               | 13               | 70.2%    |       | 12         | 70.2%    |       | 9          | 70.2%    |       | 13           | 52.3%    |       |                                                         |          |      |              |        |       |                |       |        |             |        |  |
| <b>FN2049</b> | 9                | 54.9%    |       | 8          | 45.1%    |       | 7          | 48.8%    |       | 8            | 54.9%    |       | AAL94133.1  unknown                                     |          |      |              |        |       |                |       |        |             |        |  |
|               | 8                | 48.8%    |       | 7          | 54.9%    |       | 5          | 45.1%    |       | 7            | 45.1%    |       |                                                         |          |      |              |        |       |                |       |        |             |        |  |
| <b>FN2050</b> | 11               | 47.6%    |       | 6          | 42.9%    |       | 9          | 58.7%    |       | 12           | 53.2%    |       | AAL94134.1  Hypothetical membrane-spanning protein      |          |      |              |        |       |                |       |        |             |        |  |
|               | 10               | 46.8%    |       | 10         | 58.7%    |       | 7          | 53.2%    |       | 12           | 52.4%    |       |                                                         |          |      |              |        |       |                |       |        |             |        |  |
| <b>FN2051</b> | 13               | 57.0%    |       | 12         | 54.7%    |       | 10         | 58.7%    |       | 11           | 56.4%    |       | AAL94135.1  unknown                                     |          |      |              |        |       |                |       |        |             |        |  |
|               | 12               | 57.0%    |       | 10         | 58.7%    |       | 9          | 54.2%    |       | 10           | 56.4%    |       |                                                         |          |      |              |        |       |                |       |        |             |        |  |
| <b>FN2052</b> | 14               | 39.5%    |       | 9          | 39.5%    |       | 8          | 39.5%    |       | 14           | 39.5%    |       | AAL94136.1  unknown                                     |          |      |              |        |       |                |       |        |             |        |  |
|               | 13               | 39.5%    |       | 9          | 39.5%    |       | 10         | 39.5%    |       | 14           | 39.5%    |       |                                                         |          |      |              |        |       |                |       |        |             |        |  |
| <b>FN2053</b> | 7                | 13.9%    | 1.000 | 4          | 11.9%    | 1.000 | 6          | 13.9%    | 1.000 | 5            | 11.9%    | 1.000 | AAL94137.1  Serine/threonine sodium symporter           |          |      |              |        |       |                |       |        |             |        |  |
|               | 6                | 11.9%    | 1.000 | 6          | 13.9%    | 1.000 | 6          | 13.9%    | 1.000 | 6            | 11.9%    | 1.000 |                                                         |          |      |              |        |       |                |       |        |             |        |  |
| <b>FN2054</b> | 27               | 45.8%    | 1.000 | 18         | 43.5%    | 1.000 | 25         | 52.0%    | 1.000 | 28           | 51.8%    | 1.000 | AAL94138.1  Glucose-6-phosphate isomerase               |          |      |              |        |       |                |       |        |             |        |  |
|               | 28               | 47.8%    | 1.000 | 25         | 56.7%    | 1.000 | 20         | 46.4%    | 1.000 | 25           | 54.7%    | 1.000 |                                                         |          |      |              |        |       |                |       |        |             |        |  |
| <b>FN2058</b> | 69               | 46.8%    | 1.000 | 34         | 26.3%    | 1.000 | 36         | 26.0%    | 1.000 | 53           | 39.7%    | 1.000 | AAL94142.1  Fusobacterium outer membrane protein family |          |      |              |        |       |                |       |        |             |        |  |
|               | 57               | 40.2%    | 1.000 | 61         | 42.7%    | 1.000 | 49         | 36.1%    | 1.000 | 54           | 41.5%    | 1.000 |                                                         |          |      |              |        |       |                |       |        |             |        |  |
| <b>FN2059</b> | 15               | 70.2%    |       | 0          | 0.0%     |       | 9          | 70.2%    |       | 16           | 70.2%    |       | AAL94143.1  Outer membrane protein                      |          |      |              |        |       |                |       |        |             |        |  |
|               | 13               | 70.2%    |       | 12         | 70.2%    |       | 9          | 70.2%    |       | 13           | 52.3%    |       |                                                         |          |      |              |        |       |                |       |        |             |        |  |
| <b>FN2060</b> | 9                | 54.9%    |       | 8          | 45.1%    |       | 7          | 48.8%    |       | 8            | 54.9%    |       | AAL94144.1  unknown                                     |          |      |              |        |       |                |       |        |             |        |  |
|               | 8                | 48.8%    |       | 7          | 54.9%    |       | 5          | 45.1%    |       | 7            | 45.1%    |       |                                                         |          |      |              |        |       |                |       |        |             |        |  |
| <b>FN2061</b> | 11               | 47.6%    |       | 6          | 42.9%    |       | 9          | 58.7%    |       | 12           | 53.2%    |       | AAL94145.1  Hypothetical membrane-spanning protein      |          |      |              |        |       |                |       |        |             |        |  |
|               | 10               | 46.8%    |       | 10         | 58.7%    |       | 7          | 53.2%    |       | 12           | 52.4%    |       |                                                         |          |      |              |        |       |                |       |        |             |        |  |
| <b>FN2062</b> | 13               | 57.0%    |       | 12         | 54.7%    |       | 10         | 58.7%    |       | 11           | 56.4%    |       | AAL94146.1  unknown                                     |          |      |              |        |       |                |       |        |             |        |  |
|               | 12               | 57.0%    |       | 10         | 58.7%    |       | 9          | 54.2%    |       | 10           | 56.4%    |       |                                                         |          |      |              |        |       |                |       |        |             |        |  |
| <b>FN2063</b> | 14               | 39.5%    |       | 9          | 39.5%    |       | 8          | 39.5%    |       | 14           | 39.5%    |       | AAL94147.1  unknown                                     |          |      |              |        |       |                |       |        |             |        |  |
|               | 13               | 39.5%    |       | 9          | 39.5%    |       | 10         | 39.5%    |       | 14           | 39.5%    |       |                                                         |          |      |              |        |       |                |       |        |             |        |  |

Show detected proteins only  
 Show all proteins

Filter by category:

GO: amino acid transport

Proteins found:  
1424

Enter (or paste) list of ORFs

Find ORFs

Dot Plots Dot Plots

| ORF    | Fn Summary Table |          |       | FnPg vs Fn |          |       | FnSg vs Fn |          |       | FnPgSg vs Fn |          |       | FnPgSg vs FnPg                                         |          |      | FnSg vs FnPg |       |        | FnPgSg vs FnSg |        |       | Fn Coverage |        |        |  |
|--------|------------------|----------|-------|------------|----------|-------|------------|----------|-------|--------------|----------|-------|--------------------------------------------------------|----------|------|--------------|-------|--------|----------------|--------|-------|-------------|--------|--------|--|
|        | Fn               |          |       | FnPg       |          |       | FnSg       |          |       | FnPgSg       |          |       | Description                                            |          |      |              | Fn    |        | FnPg           |        | FnSg  |             | FnPgSg |        |  |
|        | n                | coverage | prob  | n          | coverage | prob  | n          | coverage | prob  | n            | coverage | prob  | n                                                      | coverage | prob | Description  | Rep I | Rep II | Rep I          | Rep II | Rep I | Rep II      | Rep I  | Rep II |  |
| FN2067 | 4                | 26.2%    | 1.000 | 0          | 0.0%     | 0.000 | 1          | 17.1%    | 0.940 | 5            | 29.3%    | 1.000 | AAL94151.1   Thiol:disulfide interchange protein tlpA  |          |      |              |       |        |                |        |       |             |        |        |  |
|        | 3                | 25.6%    | 1.000 | 2          | 24.4%    | 0.921 | 6          | 43.3%    | 1.000 | 6            | 29.3%    | 1.000 |                                                        |          |      |              |       |        |                |        |       |             |        |        |  |
| FN2068 | 5                | 12.7%    | 1.000 | 5          | 14.6%    | 1.000 | 7          | 18.3%    | 1.000 | 4            | 9.4%     | 0.999 | AAL94152.1   dGTP triphosphohydrolase                  |          |      |              |       |        |                |        |       |             |        |        |  |
|        | 4                | 9.7%     | 1.000 | 6          | 10.3%    | 1.000 | 13         | 26.5%    | 1.000 | 1            | 1.6%     | 0.492 |                                                        |          |      |              |       |        |                |        |       |             |        |        |  |
| FN2069 | 0                | 0.0%     | 0.000 | 1          | 2.2%     | 0.420 | 0          | 0.0%     | 0.000 | 1            | 6.0%     | 0.782 | AAL94153.1   Amino acid carrier protein alsT           |          |      |              |       |        |                |        |       |             |        |        |  |
|        | 3                | 13.1%    | 0.668 | 1          | 3.1%     | 0.920 | 2          | 9.5%     | 0.747 | 0            | 0.0%     | 0.000 |                                                        |          |      |              |       |        |                |        |       |             |        |        |  |
| FN2070 | 9                | 18.9%    | 1.000 | 1          | 3.5%     | 0.967 | 6          | 14.5%    | 1.000 | 3            | 8.4%     | 0.997 | AAL94154.1   Cobyric acid synthase                     |          |      |              |       |        |                |        |       |             |        |        |  |
|        | 6                | 19.6%    | 1.000 | 7          | 21.8%    | 1.000 | 9          | 22.0%    | 1.000 | 2            | 4.7%     | 0.989 |                                                        |          |      |              |       |        |                |        |       |             |        |        |  |
| FN2073 | 8                | 52.0%    | 1.000 | 5          | 27.1%    | 1.000 | 11         | 47.5%    | 1.000 | 4            | 20.9%    | 1.000 | AAL94157.1   Adenine phosphoribosyltransferase         |          |      |              |       |        |                |        |       |             |        |        |  |
|        | 7                | 40.7%    | 1.000 | 10         | 58.8%    | 1.000 | 12         | 53.1%    | 1.000 | 6            | 27.1%    | 1.000 |                                                        |          |      |              |       |        |                |        |       |             |        |        |  |
| FN2074 | 0                | 0.0%     | 0.000 | 1          | 1.8%     | 0.984 | 1          | 1.5%     | 0.338 | 2            | 5.2%     | 0.886 | AAL94158.1   BslIM                                     |          |      |              |       |        |                |        |       |             |        |        |  |
|        | 1                | 2.4%     | 0.982 | 3          | 6.1%     | 0.856 | 2          | 2.5%     | 0.958 | 4            | 5.2%     | 0.957 |                                                        |          |      |              |       |        |                |        |       |             |        |        |  |
| FN2075 | 14               | 35.9%    | 1.000 | 8          | 15.2%    | 1.000 | 4          | 19.4%    | 1.000 | 9            | 28.2%    | 1.000 | AAL94159.1   Hypothetical protein                      |          |      |              |       |        |                |        |       |             |        |        |  |
|        | 14               | 37.9%    | 1.000 | 8          | 24.6%    | 1.000 | 10         | 24.6%    | 1.000 | 11           | 41.1%    | 1.000 |                                                        |          |      |              |       |        |                |        |       |             |        |        |  |
| FN2076 | 1                | 14.5%    | 0.979 | 1          | 14.5%    | 0.776 | 0          | 0.0%     |       | 0            | 0.0%     | 0.000 | AAL94160.1   MunI regulatory protein                   |          |      |              |       |        |                |        |       |             |        |        |  |
|        | 1                | 14.5%    | 0.967 | 0          | 0.0%     | 0.000 | 0          | 0.0%     |       | 3            | 40.8%    | 1.000 |                                                        |          |      |              |       |        |                |        |       |             |        |        |  |
| FN2078 | 3                | 11.1%    | 0.983 | 1          | 2.9%     | 0.716 | 0          | 0.0%     | 0.000 | 1            | 2.9%     | 0.430 | AAL94162.1   Transcriptional regulator, DeoR family    |          |      |              |       |        |                |        |       |             |        |        |  |
|        | 1                | 2.9%     | 0.979 | 3          | 11.8%    | 0.999 | 3          | 12.1%    | 0.999 | 1            | 2.9%     | 0.967 |                                                        |          |      |              |       |        |                |        |       |             |        |        |  |
| FN2081 | 6                | 21.7%    | 1.000 | 2          | 10.0%    | 0.819 | 0          | 0.0%     |       | 1            | 4.7%     | 0.635 | AAL94165.1   ABC transporter substrate-binding protein |          |      |              |       |        |                |        |       |             |        |        |  |
|        | 6                | 27.4%    | 1.000 | 0          | 0.0%     | 0.000 | 0          | 0.0%     |       | 0            | 0.0%     | 0.000 |                                                        |          |      |              |       |        |                |        |       |             |        |        |  |
| FN2082 | 54               | 64.7%    | 1.000 | 37         | 55.3%    | 1.000 | 43         | 67.3%    | 1.000 | 47           | 58.1%    | 1.000 | AAL94166.1   Formate--tetrahydrofolate ligase          |          |      |              |       |        |                |        |       |             |        |        |  |
|        | 42               | 64.7%    | 1.000 | 50         | 68.0%    | 1.000 | 43         | 69.1%    | 1.000 | 48           | 58.5%    | 1.000 |                                                        |          |      |              |       |        |                |        |       |             |        |        |  |
| FN2093 | 8                | 60.3%    | 1.000 | 3          | 36.4%    | 1.000 | 4          | 16.6%    | 1.000 | 8            | 42.4%    | 1.000 | AAL94177.1   General secretion pathway protein G       |          |      |              |       |        |                |        |       |             |        |        |  |
|        | 8                | 60.3%    | 1.000 | 4          | 22.5%    | 1.000 | 4          | 16.6%    | 1.000 | 7            | 42.4%    | 1.000 |                                                        |          |      |              |       |        |                |        |       |             |        |        |  |
| FN2098 | 2                | 16.3%    | 0.999 | 3          | 16.7%    | 0.997 | 4          | 27.2%    | 1.000 | 3            | 17.9%    | 1.000 | AAL94182.1   MRP-family nucleotide-binding protein     |          |      |              |       |        |                |        |       |             |        |        |  |
|        | 1                | 5.4%     | 0.788 | 7          | 43.6%    | 1.000 | 7          | 38.1%    | 1.000 | 1            | 5.4%     | 0.657 |                                                        |          |      |              |       |        |                |        |       |             |        |        |  |
| FN2100 | 10               | 32.9%    | 1.000 | 5          | 14.2%    | 1.000 | 6          | 25.0%    | 1.000 | 9            | 25.2%    | 1.000 | AAL94184.1   Hypothetical protein                      |          |      |              |       |        |                |        |       |             |        |        |  |
|        | 11               | 38.7%    | 1.000 | 7          | 24.8%    | 1.000 | 8          | 27.4%    | 1.000 | 8            | 27.6%    | 1.000 |                                                        |          |      |              |       |        |                |        |       |             |        |        |  |
| FN2102 | 9                | 22.7%    | 1.000 | 5          | 17.0%    | 1.000 | 5          | 15.7%    | 1.000 | 5            | 11.7%    | 1.000 | AAL94186.1   ABC transporter ATP-binding protein       |          |      |              |       |        |                |        |       |             |        |        |  |
|        | 9                | 19.7%    | 1.000 | 5          | 15.5%    | 1.000 | 7          | 20.1%    | 1.000 | 5            | 8.6%     | 1.000 |                                                        |          |      |              |       |        |                |        |       |             |        |        |  |
| FN2103 | 33               | 76.3%    | 1.000 | 29         | 76.0%    | 1.000 | 32         | 81.5%    | 1.000 | 35           | 81.5%    | 1.000 | AAL94187.1   tricarboxylate-binding protein            |          |      |              |       |        |                |        |       |             |        |        |  |
|        | 31               | 76.3%    | 1.000 | 29         | 78.9%    | 1.000 | 30         | 76.3%    | 1.000 | 32           | 76.3%    | 1.000 |                                                        |          |      |              |       |        |                |        |       |             |        |        |  |

Show detected proteins only  
 Show all proteins  
 Filter by category:

Proteins found:  
 1424

Enter (or paste) list of ORFs

| ORF    | Fn Summary Table |          |       | FnPg vs Fn |          |       | FnSg vs Fn |          |       | FnPgSg vs Fn |          |       | FnPgSg vs FnPg                                                 |          |      | FnSg vs FnPg |          |      | FnPgSg vs FnSg |          |      | Fn Coverage |          |      |       |        |       |        |       |        |       |
|--------|------------------|----------|-------|------------|----------|-------|------------|----------|-------|--------------|----------|-------|----------------------------------------------------------------|----------|------|--------------|----------|------|----------------|----------|------|-------------|----------|------|-------|--------|-------|--------|-------|--------|-------|
|        | Fn               |          |       | FnPg       |          |       | FnSg       |          |       | FnPgSg       |          |       | Description                                                    |          |      |              | Fn       |      | FnPg           |          | FnSg |             | FnPgSg   |      |       |        |       |        |       |        |       |
|        | n                | coverage | prob  | n          | coverage | prob  | n          | coverage | prob  | n            | coverage | prob  | n                                                              | coverage | prob | n            | coverage | prob | n              | coverage | prob | n           | coverage | prob | Rep I | Rep II | Rep I | Rep II | Rep I | Rep II | Rep I |
| FN2105 | 5                | 8.5%     | 1.000 | 1          | 4.7%     | 0.661 | 2          | 2.4%     | 0.953 | 5            | 12.1%    | 1.000 | AAL94189.1  tricarboxylate transport membrane protein RctA     |          |      |              |          |      |                |          |      |             |          |      |       |        |       |        |       |        |       |
|        | 3                | 4.7%     | 0.999 | 4          | 11.9%    | 1.000 | 2          | 8.5%     | 0.990 | 4            | 8.5%     | 1.000 |                                                                |          |      |              |          |      |                |          |      |             |          |      |       |        |       |        |       |        |       |
| FN2106 | 17               | 18.3%    | 1.000 | 15         | 19.3%    | 1.000 | 12         | 17.6%    | 1.000 | 14           | 21.0%    | 1.000 | AAL94190.1  Transporter                                        |          |      |              |          |      |                |          |      |             |          |      |       |        |       |        |       |        |       |
|        | 16               | 18.3%    | 1.000 | 13         | 18.7%    | 1.000 | 11         | 17.4%    | 1.000 | 15           | 18.3%    | 1.000 |                                                                |          |      |              |          |      |                |          |      |             |          |      |       |        |       |        |       |        |       |
| FN2107 | 16               | 37.5%    | 1.000 | 6          | 16.7%    | 1.000 | 4          | 17.5%    | 1.000 | 14           | 32.4%    | 1.000 | AAL94191.1  Galactokinase                                      |          |      |              |          |      |                |          |      |             |          |      |       |        |       |        |       |        |       |
|        | 16               | 42.7%    | 1.000 | 7          | 21.6%    | 1.000 | 5          | 15.7%    | 1.000 | 14           | 32.1%    | 1.000 |                                                                |          |      |              |          |      |                |          |      |             |          |      |       |        |       |        |       |        |       |
| FN2108 | 10               | 26.1%    | 1.000 | 4          | 10.8%    | 1.000 | 7          | 20.2%    | 1.000 | 12           | 27.9%    | 1.000 | AAL94192.1  Galactose-1-phosphate uridylyltransferase          |          |      |              |          |      |                |          |      |             |          |      |       |        |       |        |       |        |       |
|        | 12               | 26.9%    | 1.000 | 7          | 18.5%    | 1.000 | 9          | 27.7%    | 1.000 | 11           | 27.9%    | 1.000 |                                                                |          |      |              |          |      |                |          |      |             |          |      |       |        |       |        |       |        |       |
| FN2109 | 10               | 37.4%    | 1.000 | 11         | 45.0%    | 1.000 | 11         | 35.6%    | 1.000 | 15           | 60.5%    | 1.000 | AAL94193.1  UDP-glucose 4-epimerase                            |          |      |              |          |      |                |          |      |             |          |      |       |        |       |        |       |        |       |
|        | 13               | 43.8%    | 1.000 | 14         | 32.2%    | 1.000 | 14         | 42.2%    | 1.000 | 9            | 32.5%    | 1.000 |                                                                |          |      |              |          |      |                |          |      |             |          |      |       |        |       |        |       |        |       |
| FN2116 | 12               | 55.4%    | 1.000 | 2          | 23.8%    | 0.990 | 4          | 28.0%    | 1.000 | 4            | 26.8%    | 1.000 | AAL94200.1  Hypothetical exported 24-amino acid repeat protein |          |      |              |          |      |                |          |      |             |          |      |       |        |       |        |       |        |       |
|        | 13               | 57.1%    | 1.000 | 6          | 41.7%    | 1.000 | 3          | 14.9%    | 1.000 | 4            | 14.3%    | 1.000 |                                                                |          |      |              |          |      |                |          |      |             |          |      |       |        |       |        |       |        |       |
| FN2117 | 7                | 32.0%    | 1.000 | 0          | 0.0%     | 0.000 | 1          | 2.9%     | 0.361 | 2            | 7.8%     | 0.999 | AAL94201.1  Hypothetical exported 24-amino acid repeat protein |          |      |              |          |      |                |          |      |             |          |      |       |        |       |        |       |        |       |
|        | 4                | 15.2%    | 1.000 | 4          | 14.3%    | 1.000 | 4          | 15.6%    | 1.000 | 2            | 7.4%     | 0.524 |                                                                |          |      |              |          |      |                |          |      |             |          |      |       |        |       |        |       |        |       |
| FN2118 | 10               | 33.9%    | 1.000 | 0          | 0.0%     | 0.000 | 1          | 4.5%     | 0.985 | 9            | 35.5%    | 1.000 | AAL94202.1  Hypothetical exported 24-amino acid repeat protein |          |      |              |          |      |                |          |      |             |          |      |       |        |       |        |       |        |       |
|        | 11               | 33.9%    | 1.000 | 3          | 11.4%    | 1.000 | 3          | 11.4%    | 1.000 | 6            | 23.3%    | 1.000 |                                                                |          |      |              |          |      |                |          |      |             |          |      |       |        |       |        |       |        |       |
| FN2119 | 17               | 35.2%    | 1.000 | 0          | 0.0%     | 0.000 | 4          | 15.7%    | 1.000 | 7            | 19.2%    | 1.000 | AAL94203.1  Hypothetical exported 24-amino acid repeat protein |          |      |              |          |      |                |          |      |             |          |      |       |        |       |        |       |        |       |
|        | 10               | 19.8%    | 1.000 | 15         | 32.8%    | 1.000 | 9          | 25.1%    | 1.000 | 6            | 14.8%    | 1.000 |                                                                |          |      |              |          |      |                |          |      |             |          |      |       |        |       |        |       |        |       |
| FN2120 | 7                | 30.2%    | 1.000 | 1          | 4.2%     | 0.896 | 0          | 0.0%     | 0.000 | 2            | 16.9%    | 1.000 | AAL94204.1  Hypothetical exported 24-amino acid repeat protein |          |      |              |          |      |                |          |      |             |          |      |       |        |       |        |       |        |       |
|        | 8                | 34.4%    | 1.000 | 2          | 16.9%    | 1.000 | 1          | 10.1%    | 0.956 | 2            | 10.6%    | 0.992 |                                                                |          |      |              |          |      |                |          |      |             |          |      |       |        |       |        |       |        |       |
| FN2121 | 16               | 50.0%    | 1.000 | 6          | 31.3%    | 1.000 | 6          | 22.2%    | 1.000 | 14           | 50.0%    | 1.000 | AAL94205.1  Hypothetical exported 24-amino acid repeat protein |          |      |              |          |      |                |          |      |             |          |      |       |        |       |        |       |        |       |
|        | 16               | 50.0%    | 1.000 | 10         | 43.0%    | 1.000 | 1          | 7.4%     | 0.947 | 16           | 50.4%    | 1.000 |                                                                |          |      |              |          |      |                |          |      |             |          |      |       |        |       |        |       |        |       |
| FN2122 | 40               | 53.0%    | 1.000 | 32         | 47.4%    | 1.000 | 52         | 70.4%    | 1.000 | 47           | 59.6%    | 1.000 | AAL94206.1  Phenylalanyl-tRNA synthetase beta chain            |          |      |              |          |      |                |          |      |             |          |      |       |        |       |        |       |        |       |
|        | 46               | 58.9%    | 1.000 | 50         | 69.8%    | 1.000 | 47         | 62.0%    | 1.000 | 44           | 55.6%    | 1.000 |                                                                |          |      |              |          |      |                |          |      |             |          |      |       |        |       |        |       |        |       |
| FN2123 | 15               | 36.1%    | 1.000 | 12         | 42.9%    | 1.000 | 18         | 63.9%    | 1.000 | 15           | 40.8%    | 1.000 | AAL94207.1  Phenylalanyl-tRNA synthetase alpha chain           |          |      |              |          |      |                |          |      |             |          |      |       |        |       |        |       |        |       |
|        | 18               | 40.8%    | 1.000 | 18         | 66.3%    | 1.000 | 19         | 66.0%    | 1.000 | 14           | 38.5%    | 1.000 |                                                                |          |      |              |          |      |                |          |      |             |          |      |       |        |       |        |       |        |       |
| FN2125 | 27               | 31.4%    | 1.000 | 15         | 18.1%    | 1.000 | 15         | 21.1%    | 1.000 | 26           | 31.6%    | 1.000 | AAL94209.1  DNA gyrase subunit A                               |          |      |              |          |      |                |          |      |             |          |      |       |        |       |        |       |        |       |
|        | 30               | 31.2%    | 1.000 | 21         | 32.1%    | 1.000 | 30         | 35.3%    | 1.000 | 24           | 30.6%    | 1.000 |                                                                |          |      |              |          |      |                |          |      |             |          |      |       |        |       |        |       |        |       |
| FN2126 | 22               | 32.9%    | 1.000 | 8          | 13.5%    | 1.000 | 8          | 17.4%    | 1.000 | 26           | 35.4%    | 1.000 | AAL94210.1  DNA gyrase subunit B                               |          |      |              |          |      |                |          |      |             |          |      |       |        |       |        |       |        |       |
|        | 23               | 32.4%    | 1.000 | 15         | 24.7%    | 1.000 | 14         | 28.5%    | 1.000 | 23           | 35.1%    | 1.000 |                                                                |          |      |              |          |      |                |          |      |             |          |      |       |        |       |        |       |        |       |
| FN2128 | 3                | 7.3%     | 1.000 | 2          | 3.3%     | 0.988 | 1          | 2.4%     | 0.902 | 2            | 5.4%     | 0.820 | AAL94212.1  RECF protein                                       |          |      |              |          |      |                |          |      |             |          |      |       |        |       |        |       |        |       |
|        | 2                | 4.9%     | 0.963 | 1          | 3.5%     | 0.285 | 0          | 0.0%     | 0.000 | 2            | 6.0%     | 0.882 |                                                                |          |      |              |          |      |                |          |      |             |          |      |       |        |       |        |       |        |       |

Show detected proteins only  
 Show all proteins  
 Filter by category:

Proteins found:  
 1424

Enter (or paste) list of ORFs
