# Supplementary material for: Proteomics of Fusobacterium nucleatum within a model developing oral microbial community
Source: PubMed Central journal article supplement (PMC4234264; doi:10.1002/mbo3.204), 2014-08-25
Supplement: mbo30003-0729-sd5.pdf [file mbo30003-0729-sd5.pdf]

Fn Summary Table FnPg vs Fn FnSg vs Fn FnPgSg vs Fn FnPgSg vs FnPg FnSg vs FnPg FnPgSg vs FnSg Fn Coverage

| Protein | FnPgSg vs Fn           |                      |          |          | Raw    |    | Normalized |         | Description                                                    | Log <sub>2</sub> Ratios |    |    |   |   |   |   |
|---------|------------------------|----------------------|----------|----------|--------|----|------------|---------|----------------------------------------------------------------|-------------------------|----|----|---|---|---|---|
|         | Log <sub>2</sub> Ratio | Log <sub>2</sub> Sum | q-Value  | p-Value  | FnPgSg | Fn | FnPgSg     | Fn      |                                                                | -6                      | -4 | -2 | 0 | 2 | 4 | 6 |
| FN0001  | -1.995                 | 6.873                | 5.464e-4 | 1.117e-3 | 7      | 22 | 7.0000     | 24.9009 | AAL94214.1  Chromosomal replication initiator protein dnaA     |                         |    |    |   |   |   |   |
|         |                        |                      |          |          | 3      | 15 | 3.8437     | 18.3350 |                                                                |                         |    |    |   |   |   |   |
| FN0004  | 0.743                  | 12.991               | 1.429e-2 | 6.168e-2 | 145    | 66 | 145.0000   | 74.7027 | AAL94217.1  Inner membrane protein                             |                         |    |    |   |   |   |   |
|         |                        |                      |          |          | 69     | 53 | 88.4055    | 64.7838 |                                                                |                         |    |    |   |   |   |   |
| FN0005  | 0.049                  | 11.579               | 1.256e-1 | 7.273e-1 | 60     | 41 | 60.0000    | 46.4062 | AAL94218.1  Jag protein                                        |                         |    |    |   |   |   |   |
|         |                        |                      |          |          | 41     | 51 | 52.5308    | 62.3391 |                                                                |                         |    |    |   |   |   |   |
| FN0006  | -0.914                 | 7.902                | 1.152e-3 | 2.895e-3 | 11     | 17 | 11.0000    | 19.2416 | AAL94219.1  Thiophene and furan oxidation protein THDF         |                         |    |    |   |   |   |   |
|         |                        |                      |          |          | 9      | 19 | 11.5312    | 23.2244 |                                                                |                         |    |    |   |   |   |   |
| FN0007  | -1.690                 | 7.762                | 1.687e-4 | 2.265e-4 | 10     | 23 | 10.0000    | 26.0328 | AAL94220.1  Glucose inhibited division protein A               |                         |    |    |   |   |   |   |
|         |                        |                      |          |          | 5      | 22 | 6.4062     | 26.8914 |                                                                |                         |    |    |   |   |   |   |
| FN0017  |                        |                      |          |          |        | 6  |            | 6.7912  | AAL94230.1  Hypothetical protein                               |                         |    |    |   |   |   |   |
|         |                        |                      |          |          |        | 7  |            | 8.5563  |                                                                |                         |    |    |   |   |   |   |
| FN0018  | -0.591                 | 10.897               | 1.44e-4  | 1.826e-4 | 34     | 45 | 34.0000    | 50.9337 | AAL94231.1  Hypothetical protein                               |                         |    |    |   |   |   |   |
|         |                        |                      |          |          | 29     | 46 | 37.1559    | 56.2274 |                                                                |                         |    |    |   |   |   |   |
| FN0019  | 0.483                  | 4.232                |          |          |        |    |            |         | AAL94232.1  Transcription-repair coupling factor               |                         |    |    |   |   |   |   |
|         |                        |                      |          |          | 4      | 3  | 5.1250     | 3.6670  |                                                                |                         |    |    |   |   |   |   |
| FN0021  |                        |                      |          |          |        | 5  |            | 6.1117  | AAL94234.1  4-diphosphocytidyl-2-C-methyl-D-erythritol kinase  |                         |    |    |   |   |   |   |
|         |                        |                      |          |          |        |    |            |         |                                                                |                         |    |    |   |   |   |   |
| FN0022  | -0.906                 | 11.279               | 2.08e-3  | 6.345e-3 | 28     | 59 | 28.0000    | 66.7797 | AAL94235.1  Hypothetical protein                               |                         |    |    |   |   |   |   |
|         |                        |                      |          |          | 35     | 57 | 44.8434    | 69.6731 |                                                                |                         |    |    |   |   |   |   |
| FN0023  |                        |                      |          |          |        |    |            |         | AAL94236.1  Short-chain fatty acids transporter                |                         |    |    |   |   |   |   |
|         |                        |                      |          |          | 10     |    | 12.8124    |         |                                                                |                         |    |    |   |   |   |   |
| FN0024  | -1.508                 | 11.036               | 3.217e-4 | 5.553e-4 | 30     | 75 | 30.0000    | 84.8894 | AAL94237.1  Hypothetical exported 24-amino acid repeat protein |                         |    |    |   |   |   |   |
|         |                        |                      |          |          | 19     | 57 | 24.3435    | 69.6731 |                                                                |                         |    |    |   |   |   |   |
| FN0025  | -2.155                 | 8.484                |          |          |        | 36 |            | 40.7469 | AAL94238.1  Hypothetical exported 24-amino acid repeat protein |                         |    |    |   |   |   |   |
|         |                        |                      |          |          | 7      | 32 | 8.9687     | 39.1147 |                                                                |                         |    |    |   |   |   |   |
| FN0026  | 0.872                  | 9.200                | 1.2e-2   | 5.066e-2 | 40     | 9  | 40.0000    | 10.1867 | AAL94239.1  Hypothetical exported 24-amino acid repeat protein |                         |    |    |   |   |   |   |
|         |                        |                      |          |          | 20     | 21 | 25.6248    | 25.6690 |                                                                |                         |    |    |   |   |   |   |
| FN0029  | -0.920                 | 5.564                |          |          | 5      | 7  | 5.0000     | 7.9230  | AAL94242.1  Flavodoxin                                         |                         |    |    |   |   |   |   |
|         |                        |                      |          |          |        | 9  |            | 11.0010 |                                                                |                         |    |    |   |   |   |   |
| FN0030  | -0.029                 | 11.568               | 1.437e-1 | 8.494e-1 | 63     | 53 | 63.0000    | 59.9885 | AAL94243.1  5-nitroimidazole antibiotic resistance protein     |                         |    |    |   |   |   |   |
|         |                        |                      |          |          | 36     | 42 | 46.1246    | 51.3381 |                                                                |                         |    |    |   |   |   |   |

Show detected proteins only  
 Show all proteins  
 Filter by category:

Proteins found: 1297

Test Cutoff

| Signif      | Direction | Applies To |
|-------------|-----------|------------|
| red         | yes       | +          |
| yellow      | no        | n/a        |
| green       | yes       | -          |
| pink        | yes       | +          |
| light green | yes       | -          |

Applies To: ratios, bars; bars; ratios, bars; p-, q-Values

Fn Summary Table FnPg vs Fn FnSg vs Fn FnPgSg vs Fn FnPgSg vs FnPg FnSg vs FnPg FnPgSg vs FnSg Fn Coverage

| Protein | FnPgSg vs Fn           |                      |          |           | Raw    |      | Normalized |           | Description                                                              | Log <sub>2</sub> Ratios |    |    |   |   |   |   |
|---------|------------------------|----------------------|----------|-----------|--------|------|------------|-----------|--------------------------------------------------------------------------|-------------------------|----|----|---|---|---|---|
|         | Log <sub>2</sub> Ratio | Log <sub>2</sub> Sum | q-Value  | p-Value   | FnPgSg | Fn   | FnPgSg     | Fn        |                                                                          | -6                      | -4 | -2 | 0 | 2 | 4 | 6 |
| FN0031  | 0.497                  | 6.119                | 3.703e-2 | 1.839e-1  | 7      | 7    | 7.0000     | 7.9230    | AAL94244.1  unknown                                                      |                         |    |    |   |   |   |   |
|         |                        |                      |          |           | 10     | 5    | 12.8124    | 6.1117    |                                                                          |                         |    |    |   |   |   |   |
| FN0033  | -1.022                 | 11.959               | 2.845e-8 | 7.664e-10 | 45     | 79   | 45.0000    | 89.4169   | AAL94246.1  unknown                                                      |                         |    |    |   |   |   |   |
|         |                        |                      |          |           | 34     | 74   | 43.5621    | 90.4528   |                                                                          |                         |    |    |   |   |   |   |
| FN0034  | 0.619                  | 10.066               | 1.553e-3 | 4.415e-3  | 44     | 24   | 44.0000    | 27.1646   | AAL94247.1  unknown                                                      |                         |    |    |   |   |   |   |
|         |                        |                      |          |           | 29     | 21   | 37.1559    | 25.6690   |                                                                          |                         |    |    |   |   |   |   |
| FN0039  |                        |                      |          |           |        | 8    |            | 9.0549    | AAL94252.1  DNA primase (bacterial type) and small primase-like proteins |                         |    |    |   |   |   |   |
|         |                        |                      |          |           |        | 9    |            | 11.0010   |                                                                          |                         |    |    |   |   |   |   |
| FN0040  | -0.097                 | 17.664               | 1.467e-2 | 6.352e-2  | 424    | 402  | 424.0000   | 455.0073  | AAL94253.1  Asparaginyl-tRNA synthetase                                  |                         |    |    |   |   |   |   |
|         |                        |                      |          |           | 357    | 399  | 457.4025   | 487.7119  |                                                                          |                         |    |    |   |   |   |   |
| FN0041  | -0.402                 | 6.068                | 5.601e-2 | 2.941e-1  | 4      | 8    | 4.0000     | 9.0549    | AAL94254.1  unknown                                                      |                         |    |    |   |   |   |   |
|         |                        |                      |          |           | 8      | 8    | 10.2499    | 9.7787    |                                                                          |                         |    |    |   |   |   |   |
| FN0043  | -1.806                 | 5.806                |          |           | 4      | 15   | 4.0000     | 16.9779   | AAL94256.1  Hypothetical exported 24-amino acid repeat protein           |                         |    |    |   |   |   |   |
|         |                        |                      |          |           |        | 9    |            | 11.0010   |                                                                          |                         |    |    |   |   |   |   |
| FN0045  |                        |                      |          |           |        | 8    |            | 9.0549    | AAL94258.1  Shikimate 5-dehydrogenase                                    |                         |    |    |   |   |   |   |
|         |                        |                      |          |           |        | 8    |            | 9.7787    |                                                                          |                         |    |    |   |   |   |   |
| FN0046  | 1.136                  | 5.579                |          |           |        | 5    |            | 5.6593    | AAL94259.1  3-dehydroquinate dehydratase                                 |                         |    |    |   |   |   |   |
|         |                        |                      |          |           | 8      | 3    | 10.2499    | 3.6670    |                                                                          |                         |    |    |   |   |   |   |
| FN0047  | -0.392                 | 12.565               | 8.829e-4 | 2.036e-3  | 68     | 82   | 68.0000    | 92.8124   | AAL94260.1  Exodeoxyribonuclease III                                     |                         |    |    |   |   |   |   |
|         |                        |                      |          |           | 53     | 70   | 67.9057    | 85.5635   |                                                                          |                         |    |    |   |   |   |   |
| FN0048  | -1.375                 | 9.318                | 4.649e-4 | 9.091e-4  | 16     | 33   | 16.0000    | 37.3513   | AAL94261.1  4-nitrophenylphosphatase                                     |                         |    |    |   |   |   |   |
|         |                        |                      |          |           | 12     | 36   | 15.3749    | 44.0041   |                                                                          |                         |    |    |   |   |   |   |
| FN0049  |                        |                      |          |           |        |      |            |           | AAL94262.1  Hypothetical protein                                         |                         |    |    |   |   |   |   |
|         |                        |                      |          |           |        | 3    |            | 3.6670    |                                                                          |                         |    |    |   |   |   |   |
| FN0050  | -0.308                 | 20.596               | 2.719e-2 | 1.28e-1   | 906    | 1157 | 906.0000   | 1309.5608 | AAL94263.1  Fumarate reductase flavoprotein subunit                      |                         |    |    |   |   |   |   |
|         |                        |                      |          |           | 1059   | 1221 | 1356.8326  | 1492.4717 |                                                                          |                         |    |    |   |   |   |   |
| FN0052  | -0.988                 | 10.152               | 5.96e-5  | 5.203e-5  | 21     | 44   | 21.0000    | 49.8018   | AAL94265.1  Arsenate reductase                                           |                         |    |    |   |   |   |   |
|         |                        |                      |          |           | 21     | 37   | 26.9060    | 45.2264   |                                                                          |                         |    |    |   |   |   |   |
| FN0054  | 0.180                  | 15.065               | 7.739e-4 | 1.728e-3  | 193    | 153  | 193.0000   | 173.1744  | AAL94267.1  Tyrosyl-tRNA synthetase                                      |                         |    |    |   |   |   |   |
|         |                        |                      |          |           | 157    | 143  | 201.1546   | 174.7940  |                                                                          |                         |    |    |   |   |   |   |
| FN0058  | -0.885                 | 14.203               | 1.496e-5 | 5.701e-6  | 106    | 171  | 106.0000   | 193.5479  | AAL94271.1  Cysteine desulphydrase                                       |                         |    |    |   |   |   |   |
|         |                        |                      |          |           | 75     | 147  | 96.0930    | 179.6833  |                                                                          |                         |    |    |   |   |   |   |

Show detected proteins only  
 Show all proteins  
 Filter by category:

Proteins found: 1297

Enter (or paste) list of ORFs

Find ORFs

Test Cutoff

q-Value p-Value

.005

| Signif | Direction | Applies To   |
|--------|-----------|--------------|
| yes    | +         | ratios, bars |
| no     | n/a       | bars         |
| yes    | -         | ratios, bars |
| yes    | +         | p-, q-Values |
| yes    | -         | p-, q-Values |

Dot Plots Dot Plots

Fn Summary Table FnPg vs Fn FnSg vs Fn FnPgSg vs Fn FnPgSg vs FnPg FnSg vs FnPg FnPgSg vs FnSg Fn Coverage

| Protein | FnPgSg vs Fn           |                      |          |          | Raw    |     | Normalized |          | Description                                                                     | Log <sub>2</sub> Ratios |    |    |   |   |   |   |
|---------|------------------------|----------------------|----------|----------|--------|-----|------------|----------|---------------------------------------------------------------------------------|-------------------------|----|----|---|---|---|---|
|         | Log <sub>2</sub> Ratio | Log <sub>2</sub> Sum | q-Value  | p-Value  | FnPgSg | Fn  | FnPgSg     | Fn       |                                                                                 | -6                      | -4 | -2 | 0 | 2 | 4 | 6 |
| FN0059  | -0.329                 | 10.946               | 5.812e-3 | 2.184e-2 | 37     | 48  | 37.0000    | 54.3292  | AAL94272.1  NifU protein                                                        |                         |    |    |   |   |   |   |
|         |                        |                      |          |          | 33     | 37  | 42.2809    | 45.2264  |                                                                                 |                         |    |    |   |   |   |   |
| FN0060  | -0.809                 | 9.321                | 1.62e-5  | 6.499e-6 | 19     | 30  | 19.0000    | 33.9558  | AAL94273.1  D-alanyl-D-alanine carboxypeptidase                                 |                         |    |    |   |   |   |   |
|         |                        |                      |          |          | 15     | 27  | 19.2186    | 33.0031  |                                                                                 |                         |    |    |   |   |   |   |
| FN0061  | 0.017                  | 12.506               | 1.065e-1 | 6.032e-1 | 74     | 67  | 74.0000    | 75.8345  | AAL94274.1  Thermostable carboxypeptidase 1                                     |                         |    |    |   |   |   |   |
|         |                        |                      |          |          | 62     | 62  | 79.4368    | 75.7848  |                                                                                 |                         |    |    |   |   |   |   |
| FN0062  | 0.342                  | 7.177                | 3.453e-2 | 1.697e-1 | 13     | 7   | 13.0000    | 7.9230   | AAL94275.1  Hypothetical cytosolic protein                                      |                         |    |    |   |   |   |   |
|         |                        |                      |          |          | 11     | 11  | 14.0936    | 13.4457  |                                                                                 |                         |    |    |   |   |   |   |
| FN0065  | -0.753                 | 14.005               | 4.603e-4 | 8.975e-4 | 95     | 157 | 95.0000    | 177.7019 | AAL94278.1  Transcription accessory protein (S1 RNA binding domain)             |                         |    |    |   |   |   |   |
|         |                        |                      |          |          | 80     | 127 | 102.4992   | 155.2366 |                                                                                 |                         |    |    |   |   |   |   |
| FN0067  | -0.530                 | 17.426               | 2.072e-5 | 9.503e-6 | 341    | 434 | 341.0000   | 491.2268 | AAL94280.1  Isoleucyl-tRNA synthetase                                           |                         |    |    |   |   |   |   |
|         |                        |                      |          |          | 279    | 423 | 357.4658   | 517.0479 |                                                                                 |                         |    |    |   |   |   |   |
| FN0069  | -0.085                 | 14.640               | 7.328e-2 | 3.959e-1 | 163    | 159 | 163.0000   | 179.9656 | AAL94282.1  Glycyl-tRNA synthetase alpha chain                                  |                         |    |    |   |   |   |   |
|         |                        |                      |          |          | 115    | 122 | 147.3425   | 149.1249 |                                                                                 |                         |    |    |   |   |   |   |
| FN0070  | -0.461                 | 17.173               | 1.237e-4 | 1.47e-4  | 326    | 390 | 326.0000   | 441.4250 | AAL94283.1  Glycyl-tRNA synthetase beta chain                                   |                         |    |    |   |   |   |   |
|         |                        |                      |          |          | 257    | 377 | 329.2785   | 460.8205 |                                                                                 |                         |    |    |   |   |   |   |
| FN0071  |                        |                      |          |          |        |     |            |          | AAL94284.1  GTP cyclohydrolase I                                                |                         |    |    |   |   |   |   |
|         |                        |                      |          |          |        | 8   |            | 9.7787   |                                                                                 |                         |    |    |   |   |   |   |
| FN0072  | -0.484                 | 12.097               | 7.448e-5 | 7.088e-5 | 53     | 67  | 53.0000    | 75.8345  | AAL94285.1  2-amino-4-hydroxy-6-hydroxymethyldihydropteridine pyrophosphokinase |                         |    |    |   |   |   |   |
|         |                        |                      |          |          | 46     | 66  | 58.9370    | 80.6741  |                                                                                 |                         |    |    |   |   |   |   |
| FN0073  | -1.025                 | 9.482                | 1.825e-5 | 7.944e-6 | 17     | 35  | 17.0000    | 39.6151  | AAL94286.1  Dihydropteroate synthase                                            |                         |    |    |   |   |   |   |
|         |                        |                      |          |          | 16     | 30  | 20.4998    | 36.6701  |                                                                                 |                         |    |    |   |   |   |   |
| FN0074  | -0.710                 | 7.629                |          |          | 11     | 21  | 11.0000    | 23.7690  | AAL94287.1  Ethanolamine utilization protein eutS                               |                         |    |    |   |   |   |   |
|         |                        |                      |          |          |        | 10  |            | 12.2234  |                                                                                 |                         |    |    |   |   |   |   |
| FN0077  |                        |                      |          |          |        |     |            |          | AAL94290.1  Ethanolamine two-component sensor kinase                            |                         |    |    |   |   |   |   |
|         |                        |                      |          |          |        | 6   |            | 7.3340   |                                                                                 |                         |    |    |   |   |   |   |
| FN0078  | -0.209                 | 5.540                |          |          | 5      |     | 5.0000     |          | AAL94291.1  Ethanolamine utilization protein eutA                               |                         |    |    |   |   |   |   |
|         |                        |                      |          |          | 6      | 6   | 7.6874     | 7.3340   |                                                                                 |                         |    |    |   |   |   |   |
| FN0079  | -1.622                 | 11.369               | 8.866e-5 | 9.085e-5 | 33     | 86  | 33.0000    | 97.3399  | AAL94292.1  Ethanolamine ammonia-lyase heavy chain                              |                         |    |    |   |   |   |   |
|         |                        |                      |          |          | 20     | 68  | 25.6248    | 83.1188  |                                                                                 |                         |    |    |   |   |   |   |
| FN0080  | -0.932                 | 12.585               | 9.368e-4 | 2.197e-3 | 52     | 106 | 52.0000    | 119.9770 | AAL94293.1  Ethanolamine ammonia-lyase light chain                              |                         |    |    |   |   |   |   |
|         |                        |                      |          |          | 48     | 79  | 61.4995    | 96.5645  |                                                                                 |                         |    |    |   |   |   |   |

Show detected proteins only  
 Show all proteins  
 Filter by category:

Proteins found: 1297

Test Cutoff

| Signif | Direction | Applies To   |
|--------|-----------|--------------|
| yes    | +         | ratios, bars |
| no     | n/a       | bars         |
| yes    | -         | ratios, bars |
| yes    | +         | p-, q-Values |
| yes    | -         | p-, q-Values |

Fn Summary Table FnPg vs Fn FnSg vs Fn FnPgSg vs Fn FnPgSg vs FnPg FnSg vs FnPg FnPgSg vs FnSg Fn Coverage

| Protein | FnPgSg vs Fn           |                      |          |          | Raw    |     | Normalized |          | Description                                                  | Log <sub>2</sub> Ratios |    |    |   |   |   |   |
|---------|------------------------|----------------------|----------|----------|--------|-----|------------|----------|--------------------------------------------------------------|-------------------------|----|----|---|---|---|---|
|         | Log <sub>2</sub> Ratio | Log <sub>2</sub> Sum | q-Value  | p-Value  | FnPgSg | Fn  | FnPgSg     | Fn       |                                                              | -6                      | -4 | -2 | 0 | 2 | 4 | 6 |
| FN0081  | -1.614                 | 11.503               | 3.069e-5 | 1.767e-5 | 27     | 78  | 27.0000    | 88.2850  | AAL94294.1  Ethanolamine utilization protein eutL            |                         |    |    |   |   |   |   |
|         |                        |                      |          |          | 27     | 82  | 34.5935    | 100.2315 |                                                              |                         |    |    |   |   |   |   |
| FN0082  | 0.534                  | 8.032                |          |          | 21     |     | 21.0000    |          | AAL94295.1  Ethanolamine utilization protein eutM            |                         |    |    |   |   |   |   |
|         |                        |                      |          |          | 14     | 11  | 17.9374    | 13.4457  |                                                              |                         |    |    |   |   |   |   |
| FN0083  | -0.929                 | 13.177               | 1.214e-3 | 3.115e-3 | 78     | 132 | 78.0000    | 149.4054 | AAL94296.1  Ethanolamine utilization protein eutM precursor  |                         |    |    |   |   |   |   |
|         |                        |                      |          |          | 48     | 95  | 61.4995    | 116.1219 |                                                              |                         |    |    |   |   |   |   |
| FN0084  | -0.929                 | 9.620                | 4.369e-4 | 8.395e-4 | 24     | 36  | 24.0000    | 40.7469  | AAL94297.1  Acetaldehyde dehydrogenase (acetylating)         |                         |    |    |   |   |   |   |
|         |                        |                      |          |          | 13     | 30  | 16.6561    | 36.6701  |                                                              |                         |    |    |   |   |   |   |
| FN0088  |                        |                      |          |          |        |     |            |          | AAL94301.1  Hypothetical protein                             |                         |    |    |   |   |   |   |
|         |                        |                      |          |          |        | 4   |            | 4.8893   |                                                              |                         |    |    |   |   |   |   |
| FN0089  |                        |                      |          |          | 4      |     | 4.0000     |          | AAL94302.1  Ethanolamine permease                            |                         |    |    |   |   |   |   |
|         |                        |                      |          |          |        |     |            |          |                                                              |                         |    |    |   |   |   |   |
| FN0092  | -1.780                 | 8.204                | 3.482e-5 | 2.242e-5 | 7      | 26  | 7.0000     | 29.4283  | AAL94305.1  NADPH-dependent butanol dehydrogenase            |                         |    |    |   |   |   |   |
|         |                        |                      |          |          | 9      | 28  | 11.5312    | 34.2254  |                                                              |                         |    |    |   |   |   |   |
| FN0093  | -0.043                 | 16.685               | 1.195e-1 | 6.867e-1 | 305    | 323 | 305.0000   | 365.5904 | AAL94306.1  Thioredoxin                                      |                         |    |    |   |   |   |   |
|         |                        |                      |          |          | 261    | 240 | 334.4035   | 293.3605 |                                                              |                         |    |    |   |   |   |   |
| FN0100  | -0.431                 | 9.723                | 2.228e-2 | 1.019e-1 | 27     | 24  | 27.0000    | 27.1646  | AAL94309.1  Flavodoxins/hemoproteins                         |                         |    |    |   |   |   |   |
|         |                        |                      |          |          | 18     | 33  | 23.0623    | 40.3371  |                                                              |                         |    |    |   |   |   |   |
| FN0102  | -0.826                 | 6.687                | 7.66e-3  | 3.016e-2 | 5      | 12  | 5.0000     | 13.5823  | AAL94311.1  Ribonucleoside-diphosphate reductase alpha chain |                         |    |    |   |   |   |   |
|         |                        |                      |          |          | 8      | 11  | 10.2499    | 13.4457  |                                                              |                         |    |    |   |   |   |   |
| FN0103  | -1.146                 | 5.146                |          |          | 4      | 7   | 4.0000     | 7.9230   | AAL94312.1  Ribonucleoside-diphosphate reductase beta chain  |                         |    |    |   |   |   |   |
|         |                        |                      |          |          |        | 8   |            | 9.7787   |                                                              |                         |    |    |   |   |   |   |
| FN0106  | 0.122                  | 13.189               | 3.395e-2 | 1.665e-1 | 94     | 87  | 94.0000    | 98.4717  | AAL94315.1  Hypothetical protein                             |                         |    |    |   |   |   |   |
|         |                        |                      |          |          | 84     | 71  | 107.6241   | 86.7858  |                                                              |                         |    |    |   |   |   |   |
| FN0108  | 0.104                  | 6.236                |          |          | 9      | 4   | 9.0000     | 4.5274   | AAL94317.1  Microcin C7 self-immunity protein mccF           |                         |    |    |   |   |   |   |
|         |                        |                      |          |          |        | 10  |            | 12.2234  |                                                              |                         |    |    |   |   |   |   |
| FN0110  | -0.076                 | 17.160               | 6.415e-2 | 3.414e-1 | 342    | 352 | 342.0000   | 398.4144 | AAL94319.1  Seryl-tRNA synthetase                            |                         |    |    |   |   |   |   |
|         |                        |                      |          |          | 315    | 317 | 403.5904   | 387.4804 |                                                              |                         |    |    |   |   |   |   |
| FN0113  | -1.470                 | 9.373                | 3.872e-5 | 2.807e-5 | 13     | 39  | 13.0000    | 44.1425  | AAL94322.1  Heat-inducible transcription repressor hrcA      |                         |    |    |   |   |   |   |
|         |                        |                      |          |          | 14     | 34  | 17.9374    | 41.5594  |                                                              |                         |    |    |   |   |   |   |
| FN0114  | 0.309                  | 14.087               | 1.204e-2 | 5.086e-2 | 163    | 109 | 163.0000   | 123.3726 | AAL94323.1  GrpE protein                                     |                         |    |    |   |   |   |   |
|         |                        |                      |          |          | 102    | 93  | 130.6864   | 113.6772 |                                                              |                         |    |    |   |   |   |   |

Show detected proteins only  
 Show all proteins  
 Filter by category:

Proteins found: 1297

Enter (or paste) list of ORFs

Find ORFs

Test Cutoff

q-Value

p-Value

.005

| Signif | Direction | Applies To   |
|--------|-----------|--------------|
| yes    | +         | ratios, bars |
| no     | n/a       | bars         |
| yes    | -         | ratios, bars |
| yes    | +         | p-, q-Values |
| yes    | -         | p-, q-Values |

Dot Plots

Fn Summary Table FnPg vs Fn FnSg vs Fn FnPgSg vs Fn FnPgSg vs FnPg FnSg vs FnPg FnPgSg vs FnSg Fn Coverage

| Protein | FnPgSg vs Fn           |                      |          |          | Raw    |     | Normalized |           | Description                                                 | Log <sub>2</sub> Ratios |    |    |   |   |   |   |
|---------|------------------------|----------------------|----------|----------|--------|-----|------------|-----------|-------------------------------------------------------------|-------------------------|----|----|---|---|---|---|
|         | Log <sub>2</sub> Ratio | Log <sub>2</sub> Sum | q-Value  | p-Value  | FnPgSg | Fn  | FnPgSg     | Fn        |                                                             | -6                      | -4 | -2 | 0 | 2 | 4 | 6 |
| FN0116  | 0.016                  | 19.808               | 1.367e-1 | 8.016e-1 | 1009   | 797 | 1009.0000  | 902.0916  | AAL94325.1  Chaperone protein dnaK                          |                         |    |    |   |   |   |   |
|         |                        |                      |          |          | 716    | 821 | 917.3674   | 1003.5375 |                                                             |                         |    |    |   |   |   |   |
| FN0117  |                        |                      |          |          |        | 5   |            | 6.1117    | AAL94326.1  O6-methylguanine-DNA methyltransferase          |                         |    |    |   |   |   |   |
|         |                        |                      |          |          |        |     |            |           |                                                             |                         |    |    |   |   |   |   |
| FN0118  | -0.308                 | 12.617               | 5.011e-6 | 1.143e-6 | 72     | 77  | 72.0000    | 87.1531   | AAL94327.1  Chaperone protein dnaJ                          |                         |    |    |   |   |   |   |
|         |                        |                      |          |          | 55     | 73  | 70.4682    | 89.2305   |                                                             |                         |    |    |   |   |   |   |
| FN0119  |                        |                      |          |          |        | 10  |            | 11.3186   | AAL94328.1  Flavodoxin                                      |                         |    |    |   |   |   |   |
|         |                        |                      |          |          |        | 9   |            | 11.0010   |                                                             |                         |    |    |   |   |   |   |
| FN0123  |                        |                      |          |          |        | 5   |            | 5.6593    | AAL94332.1  ATPase                                          |                         |    |    |   |   |   |   |
|         |                        |                      |          |          |        | 6   |            | 7.3340    |                                                             |                         |    |    |   |   |   |   |
| FN0128  | -1.639                 | 8.215                | 3.046e-4 | 5.156e-4 | 8      | 30  | 8.0000     | 33.9558   | AAL94334.1  Spermidine/putrescine-binding protein           |                         |    |    |   |   |   |   |
|         |                        |                      |          |          | 9      | 22  | 11.5312    | 26.8914   |                                                             |                         |    |    |   |   |   |   |
| FN0129  |                        |                      |          |          |        | 3   |            | 3.3956    | AAL94335.1  Urease accessory protein ureG                   |                         |    |    |   |   |   |   |
|         |                        |                      |          |          |        |     |            |           |                                                             |                         |    |    |   |   |   |   |
| FN0130  | -0.159                 | 8.012                |          |          | 24     | 15  | 24.0000    | 16.9779   | AAL94336.1  ABC transporter ATP-binding protein             |                         |    |    |   |   |   |   |
|         |                        |                      |          |          | 5      |     | 6.4062     |           |                                                             |                         |    |    |   |   |   |   |
| FN0132  | 0.425                  | 6.174                |          |          | 12     |     | 12.0000    |           | AAL93916.1  Hemolysin                                       |                         |    |    |   |   |   |   |
|         |                        |                      |          |          | 6      | 6   | 7.6874     | 7.3340    |                                                             |                         |    |    |   |   |   |   |
| FN0147  | -0.837                 | 10.087               | 3.929e-6 | 8.249e-7 | 25     | 39  | 25.0000    | 44.1425   | AAL94353.1  PLSX protein                                    |                         |    |    |   |   |   |   |
|         |                        |                      |          |          | 19     | 36  | 24.3435    | 44.0041   |                                                             |                         |    |    |   |   |   |   |
| FN0148  | -0.054                 | 15.945               | 3.576e-2 | 1.767e-1 | 242    | 234 | 242.0000   | 264.8550  | AAL94354.1  3-oxoacyl-[acyl-carrier-protein] synthase III   |                         |    |    |   |   |   |   |
|         |                        |                      |          |          | 196    | 202 | 251.1229   | 246.9118  |                                                             |                         |    |    |   |   |   |   |
| FN0149  | -0.142                 | 15.778               | 8.342e-2 | 4.585e-1 | 190    | 252 | 190.0000   | 285.2285  | AAL94355.1  Malonyl-CoA-[acyl-carrier-protein] transacylase |                         |    |    |   |   |   |   |
|         |                        |                      |          |          | 204    | 174 | 261.3728   | 212.6864  |                                                             |                         |    |    |   |   |   |   |
| FN0150  | -0.199                 | 12.000               | 1.166e-2 | 4.904e-2 | 58     | 65  | 58.0000    | 73.5708   | AAL94356.1  Acyl carrier protein                            |                         |    |    |   |   |   |   |
|         |                        |                      |          |          | 48     | 52  | 61.4995    | 63.5614   |                                                             |                         |    |    |   |   |   |   |
| FN0151  | -0.016                 | 19.835               | 1.398e-1 | 8.225e-1 | 893    | 825 | 893.0000   | 933.7836  | AAL94357.1  3-oxoacyl-[acyl-carrier-protein] synthase       |                         |    |    |   |   |   |   |
|         |                        |                      |          |          | 804    | 827 | 1030.1165  | 1010.8715 |                                                             |                         |    |    |   |   |   |   |
| FN0152  | 0.444                  | 4.915                |          |          |        | 4   |            | 4.5274    | AAL94358.1  Ribonuclease III                                |                         |    |    |   |   |   |   |
|         |                        |                      |          |          | 5      | 4   | 6.4062     | 4.8893    |                                                             |                         |    |    |   |   |   |   |
| FN0154  | -0.307                 | 5.666                |          |          |        | 7   |            | 7.9230    | AAL94360.1  Ribonuclease G                                  |                         |    |    |   |   |   |   |
|         |                        |                      |          |          | 5      |     | 6.4062     |           |                                                             |                         |    |    |   |   |   |   |

Show detected proteins only  
 Show all proteins  
 Filter by category:

Proteins found: 1297

Enter (or paste) list of ORFs

Find ORFs

Test Cutoff

q-Value

p-Value

.005

| Signif | Direction | Applies To   |
|--------|-----------|--------------|
| yes    | +         | ratios, bars |
| no     | n/a       | bars         |
| yes    | -         | ratios, bars |
| yes    | +         | p-, q-Values |
| yes    | -         | p-, q-Values |

Dot Plots

Fn Summary Table FnPg vs Fn FnSg vs Fn FnPgSg vs Fn FnPgSg vs FnPg FnSg vs FnPg FnPgSg vs FnSg Fn Coverage

| Protein | FnPgSg vs Fn           |                      |          |          | Raw    |     | Normalized |          | Description                                            | Log <sub>2</sub> Ratios |    |    |   |   |   |   |
|---------|------------------------|----------------------|----------|----------|--------|-----|------------|----------|--------------------------------------------------------|-------------------------|----|----|---|---|---|---|
|         | Log <sub>2</sub> Ratio | Log <sub>2</sub> Sum | q-Value  | p-Value  | FnPgSg | Fn  | FnPgSg     | Fn       |                                                        | -6                      | -4 | -2 | 0 | 2 | 4 | 6 |
| FN0155  | -0.070                 | 6.627                |          |          | 13     | 9   | 13.0000    | 10.1867  | AAL94361.1  Hypothetical protein                       |                         |    |    |   |   |   |   |
|         |                        |                      |          |          | 5      |     | 6.4062     |          |                                                        |                         |    |    |   |   |   |   |
| FN0156  | 0.307                  | 7.947                | 1.625e-4 | 2.15e-4  | 17     | 12  | 17.0000    | 13.5823  | AAL94362.1  Phosphopantetheine adenylyltransferase     |                         |    |    |   |   |   |   |
|         |                        |                      |          |          | 14     | 12  | 17.9374    | 14.6680  |                                                        |                         |    |    |   |   |   |   |
| FN0157  |                        |                      |          |          |        | 7   |            | 7.9230   | AAL94363.1  DNA repair protein Rada                    |                         |    |    |   |   |   |   |
|         |                        |                      |          |          |        | 6   |            | 7.3340   |                                                        |                         |    |    |   |   |   |   |
| FN0158  | -0.730                 | 8.802                | 5.307e-3 | 1.963e-2 | 20     | 20  | 20.0000    | 22.6372  | AAL94364.1  DNA-binding protein                        |                         |    |    |   |   |   |   |
|         |                        |                      |          |          | 10     | 26  | 12.8124    | 31.7807  |                                                        |                         |    |    |   |   |   |   |
| FN0164  | -1.297                 | 15.126               | 3.319e-4 | 5.799e-4 | 117    | 243 | 117.0000   | 275.0417 | AAL94370.1  Anhydro-N-acetylmuramyl-tripeptide amidase |                         |    |    |   |   |   |   |
|         |                        |                      |          |          | 97     | 260 | 124.2802   | 317.8072 |                                                        |                         |    |    |   |   |   |   |
| FN0170  | 0.137                  | 13.551               | 1.406e-3 | 3.848e-3 | 117    | 95  | 117.0000   | 107.5266 | AAL94376.1  GTP-binding protein                        |                         |    |    |   |   |   |   |
|         |                        |                      |          |          | 88     | 83  | 112.7491   | 101.4538 |                                                        |                         |    |    |   |   |   |   |
| FN0173  | 0.284                  | 11.663               | 6.328e-3 | 2.416e-2 | 68     | 48  | 68.0000    | 54.3292  | AAL94379.1  Hypothetical protein                       |                         |    |    |   |   |   |   |
|         |                        |                      |          |          | 45     | 40  | 57.6558    | 48.8934  |                                                        |                         |    |    |   |   |   |   |
| FN0174  | 0.849                  | 13.478               | 3.396e-3 | 1.143e-2 | 165    | 65  | 165.0000   | 73.5708  | AAL94380.1  Enoyl-[acyl-carrier-protein] reductase     |                         |    |    |   |   |   |   |
|         |                        |                      |          |          | 95     | 70  | 121.7177   | 85.5635  |                                                        |                         |    |    |   |   |   |   |
| FN0175  | -0.214                 | 7.848                |          |          |        | 17  |            | 19.2416  | AAL94381.1  Cell division inhibitor MinC               |                         |    |    |   |   |   |   |
|         |                        |                      |          |          | 11     | 11  | 14.0936    | 13.4457  |                                                        |                         |    |    |   |   |   |   |
| FN0176  | 0.209                  | 15.019               | 2.682e-2 | 1.26e-1  | 174    | 158 | 174.0000   | 178.8337 | AAL94382.1  Cell division inhibitor MinD               |                         |    |    |   |   |   |   |
|         |                        |                      |          |          | 170    | 131 | 217.8107   | 160.1260 |                                                        |                         |    |    |   |   |   |   |
| FN0177  | -0.050                 | 7.349                | 1.285e-1 | 7.461e-1 | 11     | 10  | 11.0000    | 11.3186  | AAL94383.1  Cell division inhibitor MinE               |                         |    |    |   |   |   |   |
|         |                        |                      |          |          | 11     | 12  | 14.0936    | 14.6680  |                                                        |                         |    |    |   |   |   |   |
| FN0178  | -0.978                 | 12.024               | 3.175e-5 | 1.88e-5  | 42     | 78  | 42.0000    | 88.2850  | AAL94384.1  UNC-44 ankyrins                            |                         |    |    |   |   |   |   |
|         |                        |                      |          |          | 39     | 76  | 49.9683    | 92.8975  |                                                        |                         |    |    |   |   |   |   |
| FN0179  | -0.461                 | 9.357                | 1.498e-2 | 6.506e-2 | 27     | 25  | 27.0000    | 28.2965  | AAL94385.1  Ankyrin repeat proteins                    |                         |    |    |   |   |   |   |
|         |                        |                      |          |          | 13     | 26  | 16.6561    | 31.7807  |                                                        |                         |    |    |   |   |   |   |
| FN0180  |                        |                      |          |          | 8      |     | 8.0000     |          | AAL94386.1  Tetratricopeptide repeat family protein    |                         |    |    |   |   |   |   |
|         |                        |                      |          |          |        |     |            |          |                                                        |                         |    |    |   |   |   |   |
| FN0181  | -0.669                 | 8.172                | 3.035e-2 | 1.456e-1 | 9      | 13  | 9.0000     | 14.7142  | AAL94387.1  Hypothetical protein                       |                         |    |    |   |   |   |   |
|         |                        |                      |          |          | 14     | 23  | 17.9374    | 28.1137  |                                                        |                         |    |    |   |   |   |   |
| FN0182  | -0.020                 | 11.915               | 1.551e-1 | 9.294e-1 | 76     | 49  | 76.0000    | 55.4611  | AAL94388.1  Sarcosine oxidase alpha subunit            |                         |    |    |   |   |   |   |
|         |                        |                      |          |          | 37     | 57  | 47.4059    | 69.6731  |                                                        |                         |    |    |   |   |   |   |

Show detected proteins only  
 Show all proteins  
 Filter by category:

Proteins found: 1297

Enter (or paste) list of ORFs

Find ORFs

Test Cutoff

q-Value p-Value

.005

| Signif | Direction | Applies To   |
|--------|-----------|--------------|
| yes    | +         | ratios, bars |
| no     | n/a       | bars         |
| yes    | -         | ratios, bars |
| yes    | +         | p-, q-Values |
| yes    | -         | p-, q-Values |

Dot Plots Dot Plots

Fn Summary Table FnPg vs Fn FnSg vs Fn FnPgSg vs Fn FnPgSg vs FnPg FnSg vs FnPg FnPgSg vs FnSg Fn Coverage

| Protein | FnPgSg vs Fn           |                      |          |          | Raw    |      | Normalized |           | Description                                                                 | Log <sub>2</sub> Ratios |    |    |   |   |   |   |
|---------|------------------------|----------------------|----------|----------|--------|------|------------|-----------|-----------------------------------------------------------------------------|-------------------------|----|----|---|---|---|---|
|         | Log <sub>2</sub> Ratio | Log <sub>2</sub> Sum | q-Value  | p-Value  | FnPgSg | Fn   | FnPgSg     | Fn        |                                                                             | -6                      | -4 | -2 | 0 | 2 | 4 | 6 |
| FN0183  | 0.222                  | 13.861               | 4.094e-2 | 2.068e-1 | 152    | 97   | 152.0000   | 109.7903  | AAL94389.1  Glycerol-3-phosphate dehydrogenase                              |                         |    |    |   |   |   |   |
|         |                        |                      |          |          | 87     | 95   | 111.4678   | 116.1219  |                                                                             |                         |    |    |   |   |   |   |
| FN0185  | -0.703                 | 7.422                | 3.725e-2 | 1.852e-1 | 9      | 9    | 9.0000     | 10.1867   | AAL94391.1  Hypothetical protein                                            |                         |    |    |   |   |   |   |
|         |                        |                      |          |          | 9      | 19   | 11.5312    | 23.2244   |                                                                             |                         |    |    |   |   |   |   |
| FN0188  |                        |                      |          |          |        | 13   |            | 14.7142   | AAL94394.1  Peptide methionine sulfoxide reductase                          |                         |    |    |   |   |   |   |
|         |                        |                      |          |          |        |      |            |           |                                                                             |                         |    |    |   |   |   |   |
| FN0189  |                        |                      |          |          | 9      |      | 9.0000     |           | AAL94395.1  Two-component response regulator yesN                           |                         |    |    |   |   |   |   |
|         |                        |                      |          |          | 4      |      | 5.1250     |           |                                                                             |                         |    |    |   |   |   |   |
| FN0190  |                        |                      |          |          |        | 7    |            | 8.5563    | AAL94396.1  Two-component sensor kinase yesM                                |                         |    |    |   |   |   |   |
|         |                        |                      |          |          |        |      |            |           |                                                                             |                         |    |    |   |   |   |   |
| FN0191  | -0.956                 | 7.924                | 5.339e-3 | 1.977e-2 | 7      | 20   | 7.0000     | 22.6372   | AAL94397.1  helix-turn-helix DNA-binding protein                            |                         |    |    |   |   |   |   |
|         |                        |                      |          |          | 12     | 17   | 15.3749    | 20.7797   |                                                                             |                         |    |    |   |   |   |   |
| FN0192  | -1.560                 | 11.963               | 2.817e-4 | 4.648e-4 | 39     | 88   | 39.0000    | 99.6036   | AAL94398.1  Dipeptide-binding protein                                       |                         |    |    |   |   |   |   |
|         |                        |                      |          |          | 27     | 96   | 34.5935    | 117.3442  |                                                                             |                         |    |    |   |   |   |   |
| FN0197  |                        |                      |          |          |        | 4    |            | 4.8893    | AAL94403.1  Methyltransferase                                               |                         |    |    |   |   |   |   |
|         |                        |                      |          |          |        |      |            |           |                                                                             |                         |    |    |   |   |   |   |
| FN0198  | 0.119                  | 5.211                | 1.087e-1 | 6.173e-1 | 5      | 6    | 5.0000     | 6.7912    | AAL94404.1  Transcriptional regulatory protein                              |                         |    |    |   |   |   |   |
|         |                        |                      |          |          | 6      | 4    | 7.6874     | 4.8893    |                                                                             |                         |    |    |   |   |   |   |
| FN0199  | 0.034                  | 10.353               | 1.476e-1 | 8.765e-1 | 45     | 34   | 45.0000    | 38.4832   | AAL94405.1  Hypothetical protein                                            |                         |    |    |   |   |   |   |
|         |                        |                      |          |          | 22     | 27   | 28.1873    | 33.0031   |                                                                             |                         |    |    |   |   |   |   |
| FN0200  | -1.580                 | 20.140               | 6.631e-7 | 7.146e-8 | 609    | 1665 | 609.0000   | 1884.5452 | AAL94406.1  Biotin carboxyl carrier protein of glutaconyl-CoA decarboxylase |                         |    |    |   |   |   |   |
|         |                        |                      |          |          | 495    | 1499 | 634.2135   | 1832.2809 |                                                                             |                         |    |    |   |   |   |   |
| FN0202  | 0.046                  | 20.246               | 1.346e-1 | 7.871e-1 | 1335   | 1032 | 1335.0000  | 1168.0784 | AAL94408.1  Glutaconate CoA-transferase subunit A                           |                         |    |    |   |   |   |   |
|         |                        |                      |          |          | 727    | 840  | 931.4611   | 1026.7618 |                                                                             |                         |    |    |   |   |   |   |
| FN0203  | -0.570                 | 20.287               | 9.913e-4 | 2.364e-3 | 833    | 1114 | 833.0000   | 1260.8909 | AAL94409.1  Glutaconate CoA-transferase subunit B                           |                         |    |    |   |   |   |   |
|         |                        |                      |          |          | 799    | 1223 | 1023.7103  | 1494.9163 |                                                                             |                         |    |    |   |   |   |   |
| FN0204  | -0.211                 | 21.405               | 4.17e-3  | 1.466e-2 | 1462   | 1600 | 1462.0000  | 1810.9743 | AAL94410.1  Glutaconyl-CoA decarboxylase A subunit                          |                         |    |    |   |   |   |   |
|         |                        |                      |          |          | 1277   | 1452 | 1636.1428  | 1774.8312 |                                                                             |                         |    |    |   |   |   |   |
| FN0206  | -0.994                 | 11.813               | 1.258e-6 | 1.822e-7 | 44     | 74   | 44.0000    | 83.7576   | AAL94412.1  Activator of (R)-2-hydroxyglutaryl-CoA dehydratase              |                         |    |    |   |   |   |   |
|         |                        |                      |          |          | 32     | 70   | 40.9997    | 85.5635   |                                                                             |                         |    |    |   |   |   |   |
| FN0207  | -0.338                 | 18.825               | 8.945e-5 | 9.205e-5 | 620    | 681  | 620.0000   | 770.7959  | AAL94413.1  (R)-2-hydroxyglutaryl-CoA dehydratase alpha-subunit             |                         |    |    |   |   |   |   |
|         |                        |                      |          |          | 462    | 623  | 591.9326   | 761.5150  |                                                                             |                         |    |    |   |   |   |   |

Show detected proteins only  
 Show all proteins  
 Filter by category:

Proteins found: 1297

Enter (or paste) list of ORFs

Find ORFs

Test Cutoff

q-Value p-Value

.005

| Signif | Direction | Applies To   |
|--------|-----------|--------------|
| yes    | +         | ratios, bars |
| no     | n/a       | bars         |
| yes    | -         | ratios, bars |
| yes    | +         | p-, q-Values |
| yes    | -         | p-, q-Values |

Dot Plots Dot Plots

Fn Summary Table FnPg vs Fn FnSg vs Fn FnPgSg vs Fn FnPgSg vs FnPg FnSg vs FnPg FnPgSg vs FnSg Fn Coverage

| Protein | FnPgSg vs Fn           |                      |          |          | Raw    |     | Normalized |          | Description                                                    | Log <sub>2</sub> Ratios |    |    |   |   |   |   |
|---------|------------------------|----------------------|----------|----------|--------|-----|------------|----------|----------------------------------------------------------------|-------------------------|----|----|---|---|---|---|
|         | Log <sub>2</sub> Ratio | Log <sub>2</sub> Sum | q-Value  | p-Value  | FnPgSg | Fn  | FnPgSg     | Fn       |                                                                | -6                      | -4 | -2 | 0 | 2 | 4 | 6 |
| FN0208  | -0.233                 | 17.852               | 4.31e-4  | 8.251e-4 | 435    | 461 | 435.0000   | 521.7870 | AAL94414.1  (R)-2-hydroxyglutaryl-CoA dehydratase beta-subunit |                         |    |    |   |   |   |   |
|         |                        |                      |          |          | 361    | 436 | 462.5274   | 532.9383 |                                                                |                         |    |    |   |   |   |   |
| FN0209  | -0.455                 | 17.713               | 3.089e-5 | 1.788e-5 | 383    | 486 | 383.0000   | 550.0834 | AAL94415.1  Hypothetical cytosolic protein                     |                         |    |    |   |   |   |   |
|         |                        |                      |          |          | 319    | 438 | 408.7154   | 535.3830 |                                                                |                         |    |    |   |   |   |   |
| FN0212  | -0.593                 | 8.361                | 5.343e-3 | 1.979e-2 | 18     | 21  | 18.0000    | 23.7690  | AAL94418.1  Hypothetical protein                               |                         |    |    |   |   |   |   |
|         |                        |                      |          |          | 9      | 17  | 11.5312    | 20.7797  |                                                                |                         |    |    |   |   |   |   |
| FN0218  | -1.149                 | 12.740               | 1.827e-4 | 2.538e-4 | 56     | 114 | 56.0000    | 129.0319 | AAL94424.1  Anthranilate synthase component II                 |                         |    |    |   |   |   |   |
|         |                        |                      |          |          | 43     | 96  | 55.0933    | 117.3442 |                                                                |                         |    |    |   |   |   |   |
| FN0219  | 0.986                  | 5.344                |          |          |        | 4   |            | 4.5274   | AAL94425.1  Autolysin response regulator                       |                         |    |    |   |   |   |   |
|         |                        |                      |          |          | 7      |     | 8.9687     |          |                                                                |                         |    |    |   |   |   |   |
| FN0221  | 0.683                  | 11.721               | 9.094e-3 | 3.691e-2 | 87     | 40  | 87.0000    | 45.2744  | AAL94427.1  Carbon starvation protein A                        |                         |    |    |   |   |   |   |
|         |                        |                      |          |          | 47     | 38  | 60.2183    | 46.4487  |                                                                |                         |    |    |   |   |   |   |
| FN0224  | -0.636                 | 9.062                | 7.015e-3 | 2.723e-2 | 23     | 25  | 23.0000    | 28.2965  | AAL94430.1  Excinuclease ABC subunit B                         |                         |    |    |   |   |   |   |
|         |                        |                      |          |          | 11     | 24  | 14.0936    | 29.3361  |                                                                |                         |    |    |   |   |   |   |
| FN0226  | -0.441                 | 11.765               | 3.279e-6 | 6.51e-7  | 50     | 61  | 50.0000    | 69.0434  | AAL94432.1  Pyridoxal phosphate biosynthetic protein pdxA      |                         |    |    |   |   |   |   |
|         |                        |                      |          |          | 40     | 56  | 51.2496    | 68.4508  |                                                                |                         |    |    |   |   |   |   |
| FN0233  | -0.444                 | 12.009               | 2.958e-3 | 9.715e-3 | 55     | 61  | 55.0000    | 69.0434  | AAL94439.1  Hypothetical protein                               |                         |    |    |   |   |   |   |
|         |                        |                      |          |          | 43     | 66  | 55.0933    | 80.6741  |                                                                |                         |    |    |   |   |   |   |
| FN0234  |                        |                      |          |          |        | 12  |            | 13.5823  | AAL94440.1  unknown                                            |                         |    |    |   |   |   |   |
|         |                        |                      |          |          |        | 14  |            | 17.1127  |                                                                |                         |    |    |   |   |   |   |
| FN0236  | -0.360                 | 15.082               | 2.733e-3 | 8.803e-3 | 152    | 172 | 152.0000   | 194.6797 | AAL94442.1  ABC transporter substrate-binding protein          |                         |    |    |   |   |   |   |
|         |                        |                      |          |          | 138    | 186 | 176.8110   | 227.3544 |                                                                |                         |    |    |   |   |   |   |
| FN0238  | -0.547                 | 10.368               | 8.482e-3 | 3.398e-2 | 23     | 42  | 23.0000    | 47.5381  | AAL94444.1  Hypothetical protein                               |                         |    |    |   |   |   |   |
|         |                        |                      |          |          | 29     | 33  | 37.1559    | 40.3371  |                                                                |                         |    |    |   |   |   |   |
| FN0240  | -0.155                 | 12.854               | 3.066e-2 | 1.474e-1 | 76     | 87  | 76.0000    | 98.4717  | AAL94446.1  Thymidylate synthase                               |                         |    |    |   |   |   |   |
|         |                        |                      |          |          | 68     | 68  | 87.1243    | 83.1188  |                                                                |                         |    |    |   |   |   |   |
| FN0241  | -1.298                 | 7.633                | 8.746e-3 | 3.524e-2 | 9      | 25  | 9.0000     | 28.2965  | AAL94447.1  Dihydrofolate reductase                            |                         |    |    |   |   |   |   |
|         |                        |                      |          |          | 7      | 13  | 8.9687     | 15.8904  |                                                                |                         |    |    |   |   |   |   |
| FN0242  | -1.748                 | 10.070               | 2.019e-5 | 9.157e-6 | 14     | 50  | 14.0000    | 56.5929  | AAL94448.1  Trk system potassium uptake protein trkA           |                         |    |    |   |   |   |   |
|         |                        |                      |          |          | 17     | 52  | 21.7811    | 63.5614  |                                                                |                         |    |    |   |   |   |   |
| FN0243  | -2.031                 | 6.746                |          |          |        | 10  |            | 11.3186  | AAL94449.1  Poly(A) polymerase                                 |                         |    |    |   |   |   |   |
|         |                        |                      |          |          | 4      | 25  | 5.1250     | 30.5584  |                                                                |                         |    |    |   |   |   |   |

Show detected proteins only  
 Show all proteins  
 Filter by category:

Proteins found: 1297

Enter (or paste) list of ORFs

Find ORFs

Test Cutoff

q-Value p-Value

.005

| Signif      | Direction | Applies To |
|-------------|-----------|------------|
| red         | yes       | +          |
| yellow      | no        | n/a        |
| green       | yes       | -          |
| pink        | yes       | +          |
| light green | yes       | -          |

p-, q-Values

Dot Plots



Fn Summary Table FnPg vs Fn FnSg vs Fn FnPgSg vs Fn FnPgSg vs FnPg FnSg vs FnPg FnPgSg vs FnSg Fn Coverage

| Protein | FnPgSg vs Fn           |                      |          |          | Raw    |      | Normalized |           | Description                                             | Log <sub>2</sub> Ratios |    |    |   |   |   |   |
|---------|------------------------|----------------------|----------|----------|--------|------|------------|-----------|---------------------------------------------------------|-------------------------|----|----|---|---|---|---|
|         | Log <sub>2</sub> Ratio | Log <sub>2</sub> Sum | q-Value  | p-Value  | FnPgSg | Fn   | FnPgSg     | Fn        |                                                         | -6                      | -4 | -2 | 0 | 2 | 4 | 6 |
| FN0244  |                        |                      |          |          |        | 16   |            | 18.1097   | AAL94450.1  COP associated protein                      |                         |    |    |   |   |   |   |
|         |                        |                      |          |          |        | 20   |            | 24.4467   |                                                         |                         |    |    |   |   |   |   |
| FN0245  | -1.235                 | 6.405                |          |          | 6      | 12   | 6.0000     | 13.5823   | AAL94451.1  Copper-exporting ATPase                     |                         |    |    |   |   |   |   |
|         |                        |                      |          |          |        | 12   |            | 14.6680   |                                                         |                         |    |    |   |   |   |   |
| FN0247  | -0.127                 | 15.249               | 9.125e-2 | 5.071e-1 | 229    | 183  | 229.0000   | 207.1302  | AAL94453.1  Hypothetical cytosolic protein              |                         |    |    |   |   |   |   |
|         |                        |                      |          |          | 116    | 168  | 148.6238   | 205.3524  |                                                         |                         |    |    |   |   |   |   |
| FN0248  |                        |                      |          |          | 9      |      | 9.0000     |           | AAL94454.1  Hypothetical Exported Protein               |                         |    |    |   |   |   |   |
|         |                        |                      |          |          |        |      |            |           |                                                         |                         |    |    |   |   |   |   |
| FN0249  | -0.813                 | 14.879               | 2.894e-5 | 1.594e-5 | 121    | 210  | 121.0000   | 237.6904  | AAL94455.1  unknown                                     |                         |    |    |   |   |   |   |
|         |                        |                      |          |          | 110    | 182  | 140.9363   | 222.4651  |                                                         |                         |    |    |   |   |   |   |
| FN0250  | 0.063                  | 14.226               | 5.06e-2  | 2.621e-1 | 142    | 113  | 142.0000   | 127.9001  | AAL94456.1  unknown                                     |                         |    |    |   |   |   |   |
|         |                        |                      |          |          | 110    | 117  | 140.9363   | 143.0133  |                                                         |                         |    |    |   |   |   |   |
| FN0251  | -0.104                 | 15.702               | 1.066e-1 | 6.041e-1 | 175    | 195  | 175.0000   | 220.7125  | AAL94457.1  Hypothetical membrane-spanning Protein      |                         |    |    |   |   |   |   |
|         |                        |                      |          |          | 211    | 211  | 270.3415   | 257.9128  |                                                         |                         |    |    |   |   |   |   |
| FN0252  | -0.338                 | 16.247               | 1.241e-3 | 3.212e-3 | 231    | 270  | 231.0000   | 305.6019  | AAL94458.1  unknown                                     |                         |    |    |   |   |   |   |
|         |                        |                      |          |          | 207    | 263  | 265.2166   | 321.4742  |                                                         |                         |    |    |   |   |   |   |
| FN0253  | 0.155                  | 15.816               | 2.243e-2 | 1.027e-1 | 234    | 198  | 234.0000   | 224.1081  | AAL94459.1  Outer membrane protein                      |                         |    |    |   |   |   |   |
|         |                        |                      |          |          | 213    | 189  | 272.9040   | 231.0214  |                                                         |                         |    |    |   |   |   |   |
| FN0254  | -1.120                 | 18.754               | 4.687e-4 | 9.187e-4 | 373    | 851  | 373.0000   | 963.2120  | AAL94460.1  Fusobacterium outer membrane protein family |                         |    |    |   |   |   |   |
|         |                        |                      |          |          | 413    | 816  | 529.1519   | 997.4258  |                                                         |                         |    |    |   |   |   |   |
| FN0258  | -1.444                 | 6.159                |          |          |        | 16   |            | 18.1097   | AAL94464.1  Zinc-transporting ATPase                    |                         |    |    |   |   |   |   |
|         |                        |                      |          |          | 4      | 8    | 5.1250     | 9.7787    |                                                         |                         |    |    |   |   |   |   |
| FN0259  |                        |                      |          |          | 11     |      | 11.0000    |           | AAL94465.1  Zinc-transporting ATPase                    |                         |    |    |   |   |   |   |
|         |                        |                      |          |          | 12     |      | 15.3749    |           |                                                         |                         |    |    |   |   |   |   |
| FN0260  |                        |                      |          |          |        |      |            |           | AAL94466.1  Transcriptional repressor smtB              |                         |    |    |   |   |   |   |
|         |                        |                      |          |          |        | 5    |            | 6.1117    |                                                         |                         |    |    |   |   |   |   |
| FN0261  | -1.556                 | 8.822                | 3.891e-5 | 2.839e-5 | 12     | 31   | 12.0000    | 35.0876   | AAL94467.1  Pyruvate formate-lyase activating enzyme    |                         |    |    |   |   |   |   |
|         |                        |                      |          |          | 10     | 31   | 12.8124    | 37.8924   |                                                         |                         |    |    |   |   |   |   |
| FN0262  | -0.198                 | 24.438               | 9.858e-4 | 2.347e-3 | 4443   | 4406 | 4443.0000  | 4986.9705 | AAL94468.1  Formate acetyltransferase                   |                         |    |    |   |   |   |   |
|         |                        |                      |          |          | 3482   | 4274 | 4461.2757  | 5224.2620 |                                                         |                         |    |    |   |   |   |   |
| FN0263  | -1.266                 | 15.895               | 2.808e-5 | 1.515e-5 | 180    | 358  | 180.0000   | 405.2055  | AAL94469.1  Peptidyl-prolyl cis-trans isomerase         |                         |    |    |   |   |   |   |
|         |                        |                      |          |          | 108    | 295  | 138.3739   | 360.5890  |                                                         |                         |    |    |   |   |   |   |

Show detected proteins only  
 Show all proteins  
 Filter by category:

Proteins found: 1297

Test Cutoff

| Signif | Direction | Applies To   |
|--------|-----------|--------------|
| yes    | +         | ratios, bars |
| no     | n/a       | bars         |
| yes    | -         | ratios, bars |
| yes    | +         | p-, q-Values |
| yes    | -         |              |

Fn Summary Table FnPg vs Fn FnSg vs Fn FnPgSg vs Fn FnPgSg vs FnPg FnSg vs FnPg FnPgSg vs FnSg Fn Coverage

| Protein | FnPgSg vs Fn           |                      |          |          | Raw    |     | Normalized |          | Description                                                       | Log <sub>2</sub> Ratios |    |    |   |   |   |   |
|---------|------------------------|----------------------|----------|----------|--------|-----|------------|----------|-------------------------------------------------------------------|-------------------------|----|----|---|---|---|---|
|         | Log <sub>2</sub> Ratio | Log <sub>2</sub> Sum | q-Value  | p-Value  | FnPgSg | Fn  | FnPgSg     | Fn       |                                                                   | -6                      | -4 | -2 | 0 | 2 | 4 | 6 |
| FN0264  | -0.264                 | 16.639               | 2.791e-3 | 9.033e-3 | 273    | 314 | 273.0000   | 355.4037 | AAL94470.1  Hypothetical protein                                  |                         |    |    |   |   |   |   |
|         |                        |                      |          |          | 242    | 282 | 310.0599   | 344.6986 |                                                                   |                         |    |    |   |   |   |   |
| FN0265  | -2.080                 | 7.250                |          |          | 6      | 20  | 6.0000     | 22.6372  | AAL94471.1  Cell division protein ftsX                            |                         |    |    |   |   |   |   |
|         |                        |                      |          |          |        | 23  |            | 28.1137  |                                                                   |                         |    |    |   |   |   |   |
| FN0266  | -2.100                 | 5.985                |          |          |        | 14  |            | 15.8460  | AAL94472.1  membrane protein related to metalloendopeptidase      |                         |    |    |   |   |   |   |
|         |                        |                      |          |          | 3      | 14  | 3.8437     | 17.1127  |                                                                   |                         |    |    |   |   |   |   |
| FN0267  |                        |                      |          |          |        | 7   |            | 7.9230   | AAL94473.1  ATP-NAD kinase                                        |                         |    |    |   |   |   |   |
|         |                        |                      |          |          |        | 9   |            | 11.0010  |                                                                   |                         |    |    |   |   |   |   |
| FN0268  | -2.006                 | 5.891                |          |          |        | 10  |            | 11.3186  | AAL94474.1  DNA repair protein recN                               |                         |    |    |   |   |   |   |
|         |                        |                      |          |          | 3      | 16  | 3.8437     | 19.5574  |                                                                   |                         |    |    |   |   |   |   |
| FN0270  | -1.136                 | 5.516                | 2.84e-4  | 4.698e-4 | 4      | 8   | 4.0000     | 9.0549   | AAL94476.1  GTP-binding protein era                               |                         |    |    |   |   |   |   |
|         |                        |                      |          |          | 4      | 9   | 5.1250     | 11.0010  |                                                                   |                         |    |    |   |   |   |   |
| FN0271  | -0.923                 | 4.923                |          |          | 4      | 8   | 4.0000     | 9.0549   | AAL94477.1  Enoyl-CoA hydratase                                   |                         |    |    |   |   |   |   |
|         |                        |                      |          |          |        | 5   |            | 6.1117   |                                                                   |                         |    |    |   |   |   |   |
| FN0272  |                        |                      |          |          |        |     |            |          | AAL94478.1  Acetoacetate: butyrate/acetate coenzyme A transferase |                         |    |    |   |   |   |   |
|         |                        |                      |          |          |        | 5   |            | 6.1117   |                                                                   |                         |    |    |   |   |   |   |
| FN0276  | -1.749                 | 5.749                |          |          | 4      |     | 4.0000     |          | AAL94482.1  Sodium-dependent phosphate transporter                |                         |    |    |   |   |   |   |
|         |                        |                      |          |          |        | 11  |            | 13.4457  |                                                                   |                         |    |    |   |   |   |   |
| FN0277  | -0.579                 | 6.914                | 1.193e-2 | 5.032e-2 | 9      | 14  | 9.0000     | 15.8460  | AAL94483.1  Hypothetical protein                                  |                         |    |    |   |   |   |   |
|         |                        |                      |          |          | 7      | 9   | 8.9687     | 11.0010  |                                                                   |                         |    |    |   |   |   |   |
| FN0278  | 0.277                  | 16.373               | 2.187e-2 | 9.985e-2 | 362    | 230 | 362.0000   | 260.3276 | AAL94484.1  Xaa-His dipeptidase                                   |                         |    |    |   |   |   |   |
|         |                        |                      |          |          | 218    | 220 | 279.3102   | 268.9138 |                                                                   |                         |    |    |   |   |   |   |
| FN0279  | -0.558                 | 11.420               | 6.44e-6  | 1.66e-6  | 44     | 55  | 44.0000    | 62.2522  | AAL94485.1  Lipoprotein                                           |                         |    |    |   |   |   |   |
|         |                        |                      |          |          | 33     | 53  | 42.2809    | 64.7838  |                                                                   |                         |    |    |   |   |   |   |
| FN0280  | -0.804                 | 13.341               | 7.714e-6 | 2.203e-6 | 76     | 119 | 76.0000    | 134.6912 | AAL94486.1  Hypothetical protein                                  |                         |    |    |   |   |   |   |
|         |                        |                      |          |          | 61     | 110 | 78.1556    | 134.4569 |                                                                   |                         |    |    |   |   |   |   |
| FN0281  | -1.928                 | 10.273               | 2.801e-5 | 1.509e-5 | 13     | 64  | 13.0000    | 72.4390  | AAL94487.1  DNA polymerase III alpha subunit                      |                         |    |    |   |   |   |   |
|         |                        |                      |          |          | 18     | 53  | 23.0623    | 64.7838  |                                                                   |                         |    |    |   |   |   |   |
| FN0282  | -0.165                 | 10.616               | 8.002e-2 | 4.372e-1 | 30     | 32  | 30.0000    | 36.2195  | AAL94488.1  Hypothetical protein                                  |                         |    |    |   |   |   |   |
|         |                        |                      |          |          | 35     | 39  | 44.8434    | 47.6711  |                                                                   |                         |    |    |   |   |   |   |
| FN0283  | -1.932                 | 7.291                |          |          |        |     |            |          | AAL94489.1  tRNA (Guanine-N1) - methyltransferase                 |                         |    |    |   |   |   |   |
|         |                        |                      |          |          | 5      | 20  | 6.4062     | 24.4467  |                                                                   |                         |    |    |   |   |   |   |

Show detected proteins only  
 Show all proteins  
 Filter by category:

Proteins found: 1297

Enter (or paste) list of ORFs

Find ORFs

Test Cutoff

q-Value

p-Value

.005

| Signif | Direction | Applies To   |
|--------|-----------|--------------|
| yes    | +         | ratios, bars |
| no     | n/a       | bars         |
| yes    | -         | ratios, bars |
| yes    | +         | p-, q-Values |
| yes    | -         | p-, q-Values |

Dot Plots Dot Plots

Fn Summary Table FnPg vs Fn FnSg vs Fn FnPgSg vs Fn FnPgSg vs FnPg FnSg vs FnPg FnPgSg vs FnSg Fn Coverage

| Protein | FnPgSg vs Fn           |                      |          |          | Raw    |     | Normalized |          | Description                                                            | Log <sub>2</sub> Ratios |    |    |   |   |   |   |
|---------|------------------------|----------------------|----------|----------|--------|-----|------------|----------|------------------------------------------------------------------------|-------------------------|----|----|---|---|---|---|
|         | Log <sub>2</sub> Ratio | Log <sub>2</sub> Sum | q-Value  | p-Value  | FnPgSg | Fn  | FnPgSg     | Fn       |                                                                        | -6                      | -4 | -2 | 0 | 2 | 4 | 6 |
| FN0284  | 0.337                  | 7.950                | 7.893e-2 | 4.305e-1 | 11     | 15  | 11.0000    | 16.9779  | AAL94490.1  16S rRNA processing protein rimM                           |                         |    |    |   |   |   |   |
|         |                        |                      |          |          | 19     | 9   | 24.3435    | 11.0010  |                                                                        |                         |    |    |   |   |   |   |
| FN0285  | 1.943                  | 6.300                |          |          | 22     | 4   | 22.0000    | 4.5274   | AAL94491.1  RNA binding protein                                        |                         |    |    |   |   |   |   |
|         |                        |                      |          |          | 10     |     | 12.8124    |          |                                                                        |                         |    |    |   |   |   |   |
| FN0287  | -0.675                 | 6.428                | 2.962e-4 | 4.968e-4 | 7      | 11  | 7.0000     | 12.4504  | AAL94493.1  Dimethyladenosine transferase                              |                         |    |    |   |   |   |   |
|         |                        |                      |          |          | 6      | 9   | 7.6874     | 11.0010  |                                                                        |                         |    |    |   |   |   |   |
| FN0288  | 0.338                  | 10.201               | 3.316e-2 | 1.618e-1 | 31     | 28  | 31.0000    | 31.6921  | AAL94494.1  Hypoxanthine-guanine phosphoribosyltransferase             |                         |    |    |   |   |   |   |
|         |                        |                      |          |          | 36     | 24  | 46.1246    | 29.3361  |                                                                        |                         |    |    |   |   |   |   |
| FN0290  |                        |                      |          |          |        |     |            |          | AAL94496.1  Hemolysin                                                  |                         |    |    |   |   |   |   |
|         |                        |                      |          |          | 3      |     | 3.8437     |          |                                                                        |                         |    |    |   |   |   |   |
| FN0291  | 0.270                  | 4.019                |          |          | 5      |     | 5.0000     |          | AAL94497.1  Hemolysin                                                  |                         |    |    |   |   |   |   |
|         |                        |                      |          |          | 3      | 3   | 3.8437     | 3.6670   |                                                                        |                         |    |    |   |   |   |   |
| FN0294  | -0.403                 | 15.495               | 3.238e-4 | 5.605e-4 | 188    | 212 | 188.0000   | 239.9541 | AAL94500.1  Transketolase subunit A                                    |                         |    |    |   |   |   |   |
|         |                        |                      |          |          | 145    | 208 | 185.7797   | 254.2458 |                                                                        |                         |    |    |   |   |   |   |
| FN0295  | -0.486                 | 14.228               | 1.671e-3 | 4.845e-3 | 106    | 146 | 106.0000   | 165.2514 | AAL94501.1  Transketolase                                              |                         |    |    |   |   |   |   |
|         |                        |                      |          |          | 100    | 133 | 128.1239   | 162.5706 |                                                                        |                         |    |    |   |   |   |   |
| FN0296  | 0.648                  | 11.491               | 2.681e-3 | 8.596e-3 | 60     | 39  | 60.0000    | 44.1425  | AAL94502.1  Hypothetical cytosolic protein                             |                         |    |    |   |   |   |   |
|         |                        |                      |          |          | 58     | 34  | 74.3119    | 41.5594  |                                                                        |                         |    |    |   |   |   |   |
| FN0297  | -0.481                 | 6.366                |          |          |        | 6   |            | 6.7912   | AAL94503.1  ATPase associated with chromosome architecture/replication |                         |    |    |   |   |   |   |
|         |                        |                      |          |          | 6      | 12  | 7.6874     | 14.6680  |                                                                        |                         |    |    |   |   |   |   |
| FN0298  | -0.036                 | 15.012               | 9.846e-2 | 5.526e-1 | 181    | 173 | 181.0000   | 195.8116 | AAL94504.1  Histidyl-tRNA synthetase                                   |                         |    |    |   |   |   |   |
|         |                        |                      |          |          | 139    | 141 | 178.0923   | 172.3493 |                                                                        |                         |    |    |   |   |   |   |
| FN0299  | -0.090                 | 16.188               | 1.752e-2 | 7.775e-2 | 262    | 239 | 262.0000   | 270.5143 | AAL94505.1  Aspartyl-tRNA synthetase                                   |                         |    |    |   |   |   |   |
|         |                        |                      |          |          | 209    | 240 | 267.7790   | 293.3605 |                                                                        |                         |    |    |   |   |   |   |
| FN0305  | -0.100                 | 3.649                |          |          | 3      |     | 3.0000     |          | AAL94511.1  Iron(III) dicitrate-binding protein                        |                         |    |    |   |   |   |   |
|         |                        |                      |          |          | 3      | 3   | 3.8437     | 3.6670   |                                                                        |                         |    |    |   |   |   |   |
| FN0307  |                        |                      |          |          |        |     |            |          | AAL94513.1  Iron(III) dicitrate transport ATP-binding protein fecE     |                         |    |    |   |   |   |   |
|         |                        |                      |          |          | 3      |     | 3.8437     |          |                                                                        |                         |    |    |   |   |   |   |
| FN0308  | -0.343                 | 16.795               | 1.812e-2 | 8.08e-2  | 354    | 347 | 354.0000   | 392.7551 | AAL94514.1  Iron(III)-binding protein                                  |                         |    |    |   |   |   |   |
|         |                        |                      |          |          | 191    | 300 | 244.7167   | 366.7007 |                                                                        |                         |    |    |   |   |   |   |
| FN0309  | -0.359                 | 6.220                |          |          | 5      |     | 5.0000     |          | AAL94515.1  Iron(III)-transport system permease protein sfuB           |                         |    |    |   |   |   |   |
|         |                        |                      |          |          | 8      | 8   | 10.2499    | 9.7787   |                                                                        |                         |    |    |   |   |   |   |

Show detected proteins only  
 Show all proteins  
 Filter by category:

Proteins found: 1297

Enter (or paste) list of ORFs

Find ORFs

Test Cutoff

q-Value

p-Value

.005

| Signif | Direction | Applies To   |
|--------|-----------|--------------|
| yes    | +         | ratios, bars |
| no     | n/a       | bars         |
| yes    | -         | ratios, bars |
| yes    | +         | p-, q-Values |
| yes    | -         | p-, q-Values |

Dot Plots  Dot Plots

Fn Summary Table FnPg vs Fn FnSg vs Fn FnPgSg vs Fn FnPgSg vs FnPg FnSg vs FnPg FnPgSg vs FnSg Fn Coverage

| Protein | FnPgSg vs Fn           |                      |          |          | Raw    |      | Normalized |           | Description                                                          | Log <sub>2</sub> Ratios |    |    |   |   |   |   |
|---------|------------------------|----------------------|----------|----------|--------|------|------------|-----------|----------------------------------------------------------------------|-------------------------|----|----|---|---|---|---|
|         | Log <sub>2</sub> Ratio | Log <sub>2</sub> Sum | q-Value  | p-Value  | FnPgSg | Fn   | FnPgSg     | Fn        |                                                                      | -6                      | -4 | -2 | 0 | 2 | 4 | 6 |
| FN0310  | -0.601                 | 13.803               | 3.806e-3 | 1.311e-2 | 116    | 123  | 116.0000   | 139.2187  | AAL94516.1  Iron(III)-transport ATP-binding protein sfuC             |                         |    |    |   |   |   |   |
|         |                        |                      |          |          | 61     | 127  | 78.1556    | 155.2366  |                                                                      |                         |    |    |   |   |   |   |
| FN0311  | -0.226                 | 13.517               | 1.285e-2 | 5.469e-2 | 90     | 100  | 90.0000    | 113.1859  | AAL94517.1  Anaerobic ribonucleoside-triphosphate reductase          |                         |    |    |   |   |   |   |
|         |                        |                      |          |          | 86     | 99   | 110.1866   | 121.0112  |                                                                      |                         |    |    |   |   |   |   |
| FN0313  | -2.327                 | 6.970                |          |          | 5      | 13   | 5.0000     | 14.7142   | AAL94519.1  16S rRNA m(5)C 967 methyltransferase                     |                         |    |    |   |   |   |   |
|         |                        |                      |          |          |        | 29   |            | 35.4477   |                                                                      |                         |    |    |   |   |   |   |
| FN0316  | -0.223                 | 9.825                | 4.806e-2 | 2.474e-1 | 25     | 24   | 25.0000    | 27.1646   | AAL94522.1  Hypothetical protein                                     |                         |    |    |   |   |   |   |
|         |                        |                      |          |          | 24     | 31   | 30.7497    | 37.8924   |                                                                      |                         |    |    |   |   |   |   |
| FN0317  | -0.857                 | 6.522                | 1.105e-2 | 4.61e-2  | 4      | 12   | 4.0000     | 13.5823   | AAL94523.1  Tryptophan synthase beta chain                           |                         |    |    |   |   |   |   |
|         |                        |                      |          |          | 8      | 10   | 10.2499    | 12.2234   |                                                                      |                         |    |    |   |   |   |   |
| FN0319  | -0.766                 | 5.481                |          |          |        | 10   |            | 11.3186   | AAL94525.1  Citrate (pro-3S)-lyase ligase                            |                         |    |    |   |   |   |   |
|         |                        |                      |          |          | 4      | 5    | 5.1250     | 6.1117    |                                                                      |                         |    |    |   |   |   |   |
| FN0320  | 0.484                  | 9.799                | 1.113e-5 | 3.673e-6 | 36     | 23   | 36.0000    | 26.0328   | AAL94526.1  Hypothetical cytosolic protein                           |                         |    |    |   |   |   |   |
|         |                        |                      |          |          | 27     | 20   | 34.5935    | 24.4467   |                                                                      |                         |    |    |   |   |   |   |
| FN0321  | 0.075                  | 13.499               | 8.253e-2 | 4.529e-1 | 103    | 101  | 103.0000   | 114.3178  | AAL94527.1  Heat shock protein htpG                                  |                         |    |    |   |   |   |   |
|         |                        |                      |          |          | 92     | 78   | 117.8740   | 95.3422   |                                                                      |                         |    |    |   |   |   |   |
| FN0322  | 0.111                  | 21.126               | 3.666e-2 | 1.818e-1 | 1688   | 1315 | 1688.0000  | 1488.3945 | AAL94528.1  Fructose-bisphosphate aldolase                           |                         |    |    |   |   |   |   |
|         |                        |                      |          |          | 1136   | 1164 | 1455.4880  | 1422.7985 |                                                                      |                         |    |    |   |   |   |   |
| FN0325  | 1.139                  | 13.220               | 2.875e-3 | 9.372e-3 | 122    | 58   | 122.0000   | 65.6478   | AAL94529.1  LSU ribosomal protein L20P                               |                         |    |    |   |   |   |   |
|         |                        |                      |          |          | 131    | 54   | 167.8424   | 66.0061   |                                                                      |                         |    |    |   |   |   |   |
| FN0326  | 1.302                  | 7.274                |          |          | 16     | 7    | 16.0000    | 7.9230    | AAL94530.1  LSU ribosomal protein L35P                               |                         |    |    |   |   |   |   |
|         |                        |                      |          |          | 18     |      | 23.0623    |           |                                                                      |                         |    |    |   |   |   |   |
| FN0327  | -1.855                 | 10.992               | 1.798e-4 | 2.48e-4  | 18     | 75   | 18.0000    | 84.8894   | AAL94531.1  Bacterial Protein Translation Initiation Factor 3 (IF-3) |                         |    |    |   |   |   |   |
|         |                        |                      |          |          | 23     | 71   | 29.4685    | 86.7858   |                                                                      |                         |    |    |   |   |   |   |
| FN0329  | -0.651                 | 17.760               | 3.448e-4 | 6.117e-4 | 347    | 528  | 347.0000   | 597.6215  | AAL94533.1  LSU ribosomal protein L13P                               |                         |    |    |   |   |   |   |
|         |                        |                      |          |          | 316    | 477  | 404.8717   | 583.0540  |                                                                      |                         |    |    |   |   |   |   |
| FN0330  | 0.826                  | 14.085               | 1.409e-4 | 1.774e-4 | 187    | 81   | 187.0000   | 91.6806   | AAL94534.1  SSU ribosomal protein S9P                                |                         |    |    |   |   |   |   |
|         |                        |                      |          |          | 128    | 87   | 163.9986   | 106.3432  |                                                                      |                         |    |    |   |   |   |   |
| FN0331  | -0.216                 | 11.866               | 1.345e-6 | 2.051e-7 | 57     | 58   | 57.0000    | 65.6478   | AAL94535.1  Hypothetical protein                                     |                         |    |    |   |   |   |   |
|         |                        |                      |          |          | 44     | 54   | 56.3745    | 66.0061   |                                                                      |                         |    |    |   |   |   |   |
| FN0332  |                        |                      |          |          | 7      |      | 7.0000     |           | AAL94536.1  Magnesium and cobalt transport protein corA              |                         |    |    |   |   |   |   |
|         |                        |                      |          |          |        |      |            |           |                                                                      |                         |    |    |   |   |   |   |

Show detected proteins only  
 Show all proteins  
 Filter by category:

Proteins found: 1297

Enter (or paste) list of ORFs

Find ORFs

Test Cutoff

q-Value p-Value

.005

| Signif | Direction | Applies To   |
|--------|-----------|--------------|
| yes    | +         | ratios, bars |
| no     | n/a       | bars         |
| yes    | -         | ratios, bars |
| yes    | +         | p-, q-Values |
| yes    | -         | p-, q-Values |

Dot Plots Dot Plots

Fn Summary Table FnPg vs Fn FnSg vs Fn FnPgSg vs Fn FnPgSg vs FnPg FnSg vs FnPg FnPgSg vs FnSg Fn Coverage

| Protein | FnPgSg vs Fn           |                      |          |          | Raw    |      | Normalized |           | Description                                                 | Log <sub>2</sub> Ratios |    |    |   |   |   |   |
|---------|------------------------|----------------------|----------|----------|--------|------|------------|-----------|-------------------------------------------------------------|-------------------------|----|----|---|---|---|---|
|         | Log <sub>2</sub> Ratio | Log <sub>2</sub> Sum | q-Value  | p-Value  | FnPgSg | Fn   | FnPgSg     | Fn        |                                                             | -6                      | -4 | -2 | 0 | 2 | 4 | 6 |
| FN0334  | -0.088                 | 14.104               | 2.244e-3 | 6.939e-3 | 128    | 123  | 128.0000   | 139.2187  | AAL94538.1  Aspartate/aromatic aminotransferase             |                         |    |    |   |   |   |   |
|         |                        |                      |          |          | 101    | 110  | 129.4052   | 134.4569  |                                                             |                         |    |    |   |   |   |   |
| FN0335  | -0.800                 | 19.873               | 1.018e-4 | 1.121e-4 | 764    | 1093 | 764.0000   | 1237.1218 | AAL94539.1  Outer membrane porin F                          |                         |    |    |   |   |   |   |
|         |                        |                      |          |          | 563    | 1103 | 721.3378   | 1348.2361 |                                                             |                         |    |    |   |   |   |   |
| FN0336  | -0.757                 | 12.400               | 1.222e-3 | 3.141e-3 | 67     | 76   | 67.0000    | 86.0213   | AAL94540.1  Hypothetical protein                            |                         |    |    |   |   |   |   |
|         |                        |                      |          |          | 36     | 86   | 46.1246    | 105.1209  |                                                             |                         |    |    |   |   |   |   |
| FN0341  | 0.452                  | 12.443               | 1.446e-3 | 4.002e-3 | 90     | 62   | 90.0000    | 70.1753   | AAL94545.1  transport protein                               |                         |    |    |   |   |   |   |
|         |                        |                      |          |          | 66     | 47   | 84.5618    | 57.4498   |                                                             |                         |    |    |   |   |   |   |
| FN0342  | 0.166                  | 10.903               | 8.716e-2 | 4.817e-1 | 44     | 46   | 44.0000    | 52.0655   | AAL94546.1  Peptidyl-prolyl cis-trans isomerase             |                         |    |    |   |   |   |   |
|         |                        |                      |          |          | 38     | 25   | 48.6871    | 30.5584   |                                                             |                         |    |    |   |   |   |   |
| FN0343  |                        |                      |          |          |        | 4    |            | 4.5274    | AAL94547.1  Hypothetical protein                            |                         |    |    |   |   |   |   |
|         |                        |                      |          |          |        |      |            |           |                                                             |                         |    |    |   |   |   |   |
| FN0344  |                        |                      |          |          |        | 9    |            | 11.0010   | AAL94548.1  Methyltransferase                               |                         |    |    |   |   |   |   |
|         |                        |                      |          |          |        |      |            |           |                                                             |                         |    |    |   |   |   |   |
| FN0347  | -1.941                 | 11.232               | 2.077e-4 | 3.076e-4 | 27     | 78   | 27.0000    | 88.2850   | AAL94551.1  Phosphatidylserine decarboxylase                |                         |    |    |   |   |   |   |
|         |                        |                      |          |          | 18     | 85   | 23.0623    | 103.8985  |                                                             |                         |    |    |   |   |   |   |
| FN0348  | -0.598                 | 15.785               | 1.01e-3  | 2.422e-3 | 203    | 279  | 203.0000   | 315.7886  | AAL94552.1  Nicotinate phosphoribosyltransferase            |                         |    |    |   |   |   |   |
|         |                        |                      |          |          | 143    | 220  | 183.2172   | 268.9138  |                                                             |                         |    |    |   |   |   |   |
| FN0349  | 0.087                  | 6.557                |          |          | 10     | 8    | 10.0000    | 9.0549    | AAL94553.1  D-Tyr-tRNATyr deacylase                         |                         |    |    |   |   |   |   |
|         |                        |                      |          |          |        | 8    |            | 9.7787    |                                                             |                         |    |    |   |   |   |   |
| FN0351  | -0.271                 | 14.174               | 1.764e-2 | 7.835e-2 | 122    | 117  | 122.0000   | 132.4275  | AAL94555.1  unknown                                         |                         |    |    |   |   |   |   |
|         |                        |                      |          |          | 98     | 136  | 125.5615   | 166.2376  |                                                             |                         |    |    |   |   |   |   |
| FN0352  | -0.787                 | 10.231               | 4.061e-3 | 1.419e-2 | 31     | 47   | 31.0000    | 53.1974   | AAL94556.1  NA+/H+ antiporter NHAC                          |                         |    |    |   |   |   |   |
|         |                        |                      |          |          | 17     | 31   | 21.7811    | 37.8924   |                                                             |                         |    |    |   |   |   |   |
| FN0355  | -0.606                 | 14.529               | 2.716e-4 | 4.432e-4 | 116    | 170  | 116.0000   | 192.4160  | AAL94558.1  S-adenosylmethionine synthetase                 |                         |    |    |   |   |   |   |
|         |                        |                      |          |          | 104    | 153  | 133.2489   | 187.0173  |                                                             |                         |    |    |   |   |   |   |
| FN0356  | -1.801                 | 8.752                | 2.524e-7 | 1.913e-8 | 12     | 35   | 12.0000    | 39.6151   | AAL94559.1  Lactoylglutathione lyase                        |                         |    |    |   |   |   |   |
|         |                        |                      |          |          | 8      | 31   | 10.2499    | 37.8924   |                                                             |                         |    |    |   |   |   |   |
| FN0357  | -0.138                 | 7.580                | 1.187e-1 | 6.818e-1 | 11     | 17   | 11.0000    | 19.2416   | AAL94560.1  ATP synthase epsilon chain, sodium ion specific |                         |    |    |   |   |   |   |
|         |                        |                      |          |          | 12     | 8    | 15.3749    | 9.7787    |                                                             |                         |    |    |   |   |   |   |
| FN0358  | -0.992                 | 17.088               | 2.477e-7 | 1.823e-8 | 268    | 470  | 268.0000   | 531.9737  | AAL94561.1  ATP synthase beta chain, sodium ion specific    |                         |    |    |   |   |   |   |
|         |                        |                      |          |          | 204    | 426  | 261.3728   | 520.7149  |                                                             |                         |    |    |   |   |   |   |

Show detected proteins only  
 Show all proteins  
 Filter by category:

Proteins found: 1297

Test Cutoff

| Signif | Direction | Applies To   |
|--------|-----------|--------------|
| yes    | +         | ratios, bars |
| no     | n/a       | bars         |
| yes    | -         | ratios, bars |
| yes    | +         | p-, q-Values |
| yes    | -         |              |

Fn Summary Table FnPg vs Fn FnSg vs Fn FnPgSg vs Fn FnPgSg vs FnPg FnSg vs FnPg FnPgSg vs FnSg Fn Coverage

| Protein | FnPgSg vs Fn           |                      |          |          | Raw    |     | Normalized |          | Description                                                  | Log <sub>2</sub> Ratios |    |    |   |   |   |   |
|---------|------------------------|----------------------|----------|----------|--------|-----|------------|----------|--------------------------------------------------------------|-------------------------|----|----|---|---|---|---|
|         | Log <sub>2</sub> Ratio | Log <sub>2</sub> Sum | q-Value  | p-Value  | FnPgSg | Fn  | FnPgSg     | Fn       |                                                              | -6                      | -4 | -2 | 0 | 2 | 4 | 6 |
| FN0359  | -0.584                 | 11.809               | 1.868e-4 | 2.623e-4 | 53     | 68  | 53.0000    | 76.9664  | AAL94562.1  ATP synthase gamma chain, sodium ion specific    |                         |    |    |   |   |   |   |
|         |                        |                      |          |          | 35     | 57  | 44.8434    | 69.6731  |                                                              |                         |    |    |   |   |   |   |
| FN0360  | 0.041                  | 13.439               | 8.798e-2 | 4.868e-1 | 101    | 95  | 101.0000   | 107.5266 | AAL94563.1  ATP synthase alpha chain, sodium ion specific    |                         |    |    |   |   |   |   |
|         |                        |                      |          |          | 88     | 82  | 112.7491   | 100.2315 |                                                              |                         |    |    |   |   |   |   |
| FN0361  | -0.550                 | 10.085               | 2.28e-4  | 3.525e-4 | 25     | 37  | 25.0000    | 41.8788  | AAL94564.1  ATP synthase delta chain, sodium ion specific    |                         |    |    |   |   |   |   |
|         |                        |                      |          |          | 23     | 31  | 29.4685    | 37.8924  |                                                              |                         |    |    |   |   |   |   |
| FN0362  | -0.536                 | 10.276               | 3.621e-2 | 1.792e-1 | 29     | 49  | 29.0000    | 55.4611  | AAL94565.1  ATP synthase B chain, sodium ion specific        |                         |    |    |   |   |   |   |
|         |                        |                      |          |          | 23     | 24  | 29.4685    | 29.3361  |                                                              |                         |    |    |   |   |   |   |
| FN0364  | 1.071                  | 4.820                |          |          | 9      |     | 9.0000     |          | AAL94567.1  ATP synthase A chain, sodium ion specific        |                         |    |    |   |   |   |   |
|         |                        |                      |          |          | 5      | 3   | 6.4062     | 3.6670   |                                                              |                         |    |    |   |   |   |   |
| FN0366  | 0.100                  | 16.101               | 4.609e-2 | 2.361e-1 | 253    | 228 | 253.0000   | 258.0638 | AAL94569.1  Phosphoglucosamine mutase                        |                         |    |    |   |   |   |   |
|         |                        |                      |          |          | 231    | 208 | 295.9663   | 254.2458 |                                                              |                         |    |    |   |   |   |   |
| FN0368  | 0.078                  | 12.788               | 7.982e-2 | 4.36e-1  | 78     | 69  | 78.0000    | 78.0983  | AAL94571.1  Adenylosuccinate lyase                           |                         |    |    |   |   |   |   |
|         |                        |                      |          |          | 74     | 70  | 94.8117    | 85.5635  |                                                              |                         |    |    |   |   |   |   |
| FN0370  | -1.004                 | 9.526                | 2.752e-3 | 8.88e-3  | 14     | 28  | 14.0000    | 31.6921  | AAL94573.1  Signal peptidase I                               |                         |    |    |   |   |   |   |
|         |                        |                      |          |          | 19     | 37  | 24.3435    | 45.2264  |                                                              |                         |    |    |   |   |   |   |
| FN0371  | 0.167                  | 12.681               | 6.273e-2 | 3.331e-1 | 100    | 66  | 100.0000   | 74.7027  | AAL94574.1  Hypothetical protein                             |                         |    |    |   |   |   |   |
|         |                        |                      |          |          | 56     | 64  | 71.7494    | 78.2295  |                                                              |                         |    |    |   |   |   |   |
| FN0374  |                        |                      |          |          |        | 3   |            | 3.3956   | AAL94577.1  Single-stranded-DNA-specific exonuclease recJ    |                         |    |    |   |   |   |   |
|         |                        |                      |          |          |        | 4   |            | 4.8893   |                                                              |                         |    |    |   |   |   |   |
| FN0375  | 0.529                  | 17.403               | 1.105e-3 | 2.734e-3 | 466    | 297 | 466.0000   | 336.1621 | AAL94578.1  Iron(III)-binding protein                        |                         |    |    |   |   |   |   |
|         |                        |                      |          |          | 417    | 292 | 534.2768   | 356.9220 |                                                              |                         |    |    |   |   |   |   |
| FN0376  | -0.708                 | 11.289               | 6.328e-5 | 5.649e-5 | 36     | 59  | 36.0000    | 66.7797  | AAL94579.1  Iron(III)-transport ATP-binding protein sfuC     |                         |    |    |   |   |   |   |
|         |                        |                      |          |          | 33     | 50  | 42.2809    | 61.1168  |                                                              |                         |    |    |   |   |   |   |
| FN0377  | 1.124                  | 8.044                |          |          | 39     |     | 39.0000    |          | AAL94580.1  Iron(III)-transport system permease protein sfuB |                         |    |    |   |   |   |   |
|         |                        |                      |          |          | 7      | 9   | 8.9687     | 11.0010  |                                                              |                         |    |    |   |   |   |   |
| FN0378  | 0.286                  | 6.371                | 8.949e-2 | 4.962e-1 | 6      | 7   | 6.0000     | 7.9230   | AAL94581.1  UDP-glucose 4-epimerase                          |                         |    |    |   |   |   |   |
|         |                        |                      |          |          | 11     | 7   | 14.0936    | 8.5563   |                                                              |                         |    |    |   |   |   |   |
| FN0379  | -0.107                 | 6.985                | 1.231e-1 | 7.105e-1 | 14     | 12  | 14.0000    | 13.5823  | AAL94582.1  Hypothetical protein                             |                         |    |    |   |   |   |   |
|         |                        |                      |          |          | 6      | 8   | 7.6874     | 9.7787   |                                                              |                         |    |    |   |   |   |   |
| FN0380  | -1.707                 | 7.592                |          |          |        | 26  |            | 29.4283  | AAL94583.1  unknown                                          |                         |    |    |   |   |   |   |
|         |                        |                      |          |          | 6      | 17  | 7.6874     | 20.7797  |                                                              |                         |    |    |   |   |   |   |

Show detected proteins only  
 Show all proteins  
 Filter by category:

Proteins found: 1297

Enter (or paste) list of ORFs

Find ORFs

Test Cutoff

q-Value p-Value

.005

| Signif | Direction | Applies To   |
|--------|-----------|--------------|
| yes    | +         | ratios, bars |
| no     | n/a       | bars         |
| yes    | -         | ratios, bars |
| yes    | +         | p-, q-Values |
| yes    | -         | p-, q-Values |

Dot Plots Dot Plots

| Protein | FnPgSg vs Fn           |                      |          |          | Raw    |      | Normalized |           | Description                                                    | Log <sub>2</sub> Ratios |    |    |   |   |   |   |
|---------|------------------------|----------------------|----------|----------|--------|------|------------|-----------|----------------------------------------------------------------|-------------------------|----|----|---|---|---|---|
|         | Log <sub>2</sub> Ratio | Log <sub>2</sub> Sum | q-Value  | p-Value  | FnPgSg | Fn   | FnPgSg     | Fn        |                                                                | -6                      | -4 | -2 | 0 | 2 | 4 | 6 |
| FN0381  | 0.286                  | 8.570                | 4.251e-3 | 1.502e-2 | 20     | 15   | 20.0000    | 16.9779   | AAL94584.1  unknown                                            |                         |    |    |   |   |   |   |
|         |                        |                      |          |          | 18     | 15   | 23.0623    | 18.3350   |                                                                |                         |    |    |   |   |   |   |
| FN0382  |                        |                      |          |          |        | 8    |            | 9.0549    | AAL94585.1  Hypothetical protein                               |                         |    |    |   |   |   |   |
|         |                        |                      |          |          |        | 8    |            | 9.7787    |                                                                |                         |    |    |   |   |   |   |
| FN0383  |                        |                      |          |          |        | 7    |            | 7.9230    | AAL94586.1  Lipopolysaccharide N-acetylglucosaminyltransferase |                         |    |    |   |   |   |   |
|         |                        |                      |          |          |        | 10   |            | 12.2234   |                                                                |                         |    |    |   |   |   |   |
| FN0384  | -1.709                 | 8.942                | 4.412e-4 | 8.5e-4   | 13     | 32   | 13.0000    | 36.2195   | AAL94587.1  Hypothetical protein                               |                         |    |    |   |   |   |   |
|         |                        |                      |          |          |        | 9    | 36         | 11.5312   |                                                                | 44.0041                 |    |    |   |   |   |   |
| FN0386  |                        |                      |          |          |        | 12   |            | 13.5823   | AAL94589.1  Hypothetical protein                               |                         |    |    |   |   |   |   |
|         |                        |                      |          |          |        | 11   |            | 13.4457   |                                                                |                         |    |    |   |   |   |   |
| FN0387  | -1.823                 | 12.522               | 3.938e-5 | 2.918e-5 | 38     | 121  | 38.0000    | 136.9549  | AAL94590.1  Fusobacterium outer membrane protein family        |                         |    |    |   |   |   |   |
|         |                        |                      |          |          |        | 34   | 124        | 43.5621   |                                                                | 151.5696                |    |    |   |   |   |   |
| FN0390  | 1.213                  | 11.769               | 2.133e-3 | 6.538e-3 | 103    | 34   | 103.0000   | 38.4832   | AAL94593.1  Hypothetical protein                               |                         |    |    |   |   |   |   |
|         |                        |                      |          |          |        | 60   | 32         | 76.8744   |                                                                | 39.1147                 |    |    |   |   |   |   |
| FN0391  | -0.312                 | 7.965                | 2.99e-3  | 9.845e-3 | 13     | 16   | 13.0000    | 18.1097   | AAL94594.1  Hydrolase (HAD superfamily)                        |                         |    |    |   |   |   |   |
|         |                        |                      |          |          |        | 12   | 14         | 15.3749   |                                                                | 17.1127                 |    |    |   |   |   |   |
| FN0392  | -1.162                 | 6.915                | 6.901e-6 | 1.857e-6 | 7      | 15   | 7.0000     | 16.9779   | AAL94595.1  Oxygen-independent coproporphyrinogen III oxidase  |                         |    |    |   |   |   |   |
|         |                        |                      |          |          |        | 6    | 13         | 7.6874    |                                                                | 15.8904                 |    |    |   |   |   |   |
| FN0393  | -0.799                 | 5.478                | 6.439e-5 | 5.787e-5 | 5      | 8    | 5.0000     | 9.0549    | AAL94596.1  Polysaccharide deacetylase                         |                         |    |    |   |   |   |   |
|         |                        |                      |          |          |        | 4    | 7          | 5.1250    |                                                                | 8.5563                  |    |    |   |   |   |   |
| FN0394  | -0.889                 | 6.059                |          |          | 6      | 11   | 6.0000     | 12.4504   | AAL94597.1  Outer membrane protein                             |                         |    |    |   |   |   |   |
|         |                        |                      |          |          |        |      | 8          |           |                                                                | 9.7787                  |    |    |   |   |   |   |
| FN0396  | 0.388                  | 23.786               | 1.779e-4 | 2.444e-4 | 4210   | 2994 | 4210.0000  | 3388.7857 | AAL94599.1  Dipeptide-binding protein                          |                         |    |    |   |   |   |   |
|         |                        |                      |          |          |        | 3505 | 2667       | 4490.7442 |                                                                | 3259.9688               |    |    |   |   |   |   |
| FN0397  | 0.292                  | 11.044               | 9.168e-3 | 3.727e-2 | 53     | 41   | 53.0000    | 46.4062   | AAL94600.1  Dipeptide transport system permease protein dppB   |                         |    |    |   |   |   |   |
|         |                        |                      |          |          |        | 38   | 30         | 48.6871   |                                                                | 36.6701                 |    |    |   |   |   |   |
| FN0398  | -0.506                 | 11.735               | 2.89e-3  | 9.437e-3 | 48     | 56   | 48.0000    | 63.3841   | AAL94601.1  Dipeptide transport system permease protein dppC   |                         |    |    |   |   |   |   |
|         |                        |                      |          |          |        | 39   | 62         | 49.9683   |                                                                | 75.7848                 |    |    |   |   |   |   |
| FN0399  | -0.367                 | 15.250               | 9.994e-3 | 4.12e-2  | 149    | 178  | 149.0000   | 201.4709  | AAL94602.1  Dipeptide transport ATP-binding protein dppD       |                         |    |    |   |   |   |   |
|         |                        |                      |          |          |        | 155  | 202        | 198.5921  |                                                                | 246.9118                |    |    |   |   |   |   |
| FN0400  | -1.174                 | 17.112               | 1.348e-4 | 1.662e-4 | 227    | 498  | 227.0000   | 563.6658  | AAL94603.1  Dipeptide transport ATP-binding protein dppF       |                         |    |    |   |   |   |   |
|         |                        |                      |          |          |        | 214  | 464        | 274.1852  |                                                                | 567.1637                |    |    |   |   |   |   |

Show detected proteins only  
 Show all proteins  
 Filter by category:

Proteins found: 1297

Enter (or paste) list of ORFs

Find ORFs

Test Cutoff

q-Value p-Value

.005

| Signif | Direction | Applies To   |
|--------|-----------|--------------|
| yes    | +         | ratios, bars |
| no     | n/a       | bars         |
| yes    | -         | ratios, bars |
| yes    | +         | p-, q-Values |
| yes    | -         | p-, q-Values |

Dot Plots Dot Plots

| Protein | FnPgSg vs Fn           |                      |          |          | Raw    |     | Normalized |          | Description                                                                  | Log <sub>2</sub> Ratios |    |    |   |   |   |   |
|---------|------------------------|----------------------|----------|----------|--------|-----|------------|----------|------------------------------------------------------------------------------|-------------------------|----|----|---|---|---|---|
|         | Log <sub>2</sub> Ratio | Log <sub>2</sub> Sum | q-Value  | p-Value  | FnPgSg | Fn  | FnPgSg     | Fn       |                                                                              | -6                      | -4 | -2 | 0 | 2 | 4 | 6 |
| FN0405  | 0.742                  | 13.733               | 4.952e-3 | 1.804e-2 | 175    | 86  | 175.0000   | 97.3399  | AAL94608.1  Tryptophanyl-tRNA synthetase                                     |                         |    |    |   |   |   |   |
|         |                        |                      |          |          | 99     | 68  | 126.8427   | 83.1188  |                                                                              |                         |    |    |   |   |   |   |
| FN0406  | -0.395                 | 11.956               | 2.87e-3  | 9.355e-3 | 60     | 64  | 60.0000    | 72.4390  | AAL94609.1  Alanine racemase, biosynthetic                                   |                         |    |    |   |   |   |   |
|         |                        |                      |          |          | 39     | 59  | 49.9683    | 72.1178  |                                                                              |                         |    |    |   |   |   |   |
| FN0407  | 0.167                  | 12.951               | 3.356e-2 | 1.642e-1 | 104    | 75  | 104.0000   | 84.8894  | AAL94610.1  Hypothetical protein                                             |                         |    |    |   |   |   |   |
|         |                        |                      |          |          | 66     | 68  | 84.5618    | 83.1188  |                                                                              |                         |    |    |   |   |   |   |
| FN0408  | -0.372                 | 12.560               | 6.445e-3 | 2.47e-2  | 61     | 86  | 61.0000    | 97.3399  | AAL94611.1  Acetyl-coenzyme A carboxylase carboxyl transferase subunit beta  |                         |    |    |   |   |   |   |
|         |                        |                      |          |          | 59     | 65  | 75.5931    | 79.4518  |                                                                              |                         |    |    |   |   |   |   |
| FN0409  | 0.047                  | 17.998               | 1.012e-1 | 5.699e-1 | 475    | 453 | 475.0000   | 512.7321 | AAL94612.1  Acetyl-coenzyme A carboxylase carboxyl transferase subunit alpha |                         |    |    |   |   |   |   |
|         |                        |                      |          |          | 441    | 404 | 565.0266   | 493.8235 |                                                                              |                         |    |    |   |   |   |   |
| FN0410  | -0.330                 | 13.814               | 1.17e-5  | 3.94e-6  | 109    | 120 | 109.0000   | 135.8231 | AAL94613.1  6-phosphofructokinase                                            |                         |    |    |   |   |   |   |
|         |                        |                      |          |          | 82     | 109 | 105.0616   | 133.2346 |                                                                              |                         |    |    |   |   |   |   |
| FN0411  |                        |                      |          |          |        |     |            |          | AAL94614.1  putative alpha helix protein                                     |                         |    |    |   |   |   |   |
|         |                        |                      |          |          |        | 8   |            | 9.7787   |                                                                              |                         |    |    |   |   |   |   |
| FN0412  |                        |                      |          |          |        |     |            |          | AAL94615.1  Recombination protein recR                                       |                         |    |    |   |   |   |   |
|         |                        |                      |          |          |        | 10  |            | 12.2234  |                                                                              |                         |    |    |   |   |   |   |
| FN0413  | 0.236                  | 3.764                |          |          | 4      | 3   | 4.0000     | 3.3956   | AAL94616.1  unknown                                                          |                         |    |    |   |   |   |   |
|         |                        |                      |          |          |        |     |            |          |                                                                              |                         |    |    |   |   |   |   |
| FN0414  |                        |                      |          |          | 6      |     | 6.0000     |          | AAL94617.1  ATP-dependent helicase HEPA                                      |                         |    |    |   |   |   |   |
|         |                        |                      |          |          |        |     |            |          |                                                                              |                         |    |    |   |   |   |   |
| FN0416  | -1.240                 | 7.959                | 1.825e-3 | 5.409e-3 | 9      | 18  | 9.0000     | 20.3735  | AAL94619.1  Type III restriction-modification system methylation subunit     |                         |    |    |   |   |   |   |
|         |                        |                      |          |          | 9      | 23  | 11.5312    | 28.1137  |                                                                              |                         |    |    |   |   |   |   |
| FN0417  | -2.222                 | 9.230                | 1.308e-4 | 1.591e-4 | 15     | 46  | 15.0000    | 52.0655  | AAL94620.1  Type III restriction-modification system restriction subunit     |                         |    |    |   |   |   |   |
|         |                        |                      |          |          | 6      | 44  | 7.6874     | 53.7828  |                                                                              |                         |    |    |   |   |   |   |
| FN0418  |                        |                      |          |          | 4      |     | 4.0000     |          | AAL94621.1  Uracil phosphoribosyltransferase                                 |                         |    |    |   |   |   |   |
|         |                        |                      |          |          |        |     |            |          |                                                                              |                         |    |    |   |   |   |   |
| FN0419  | -0.696                 | 6.305                |          |          | 5      | 10  | 5.0000     | 11.3186  | AAL94622.1  Aspartate carbamoyltransferase                                   |                         |    |    |   |   |   |   |
|         |                        |                      |          |          | 7      |     | 8.9687     |          |                                                                              |                         |    |    |   |   |   |   |
| FN0420  | -2.171                 | 5.341                |          |          | 3      | 12  | 3.0000     | 13.5823  | AAL94623.1  Dihydroorotase                                                   |                         |    |    |   |   |   |   |
|         |                        |                      |          |          |        | 11  |            | 13.4457  |                                                                              |                         |    |    |   |   |   |   |
| FN0421  | -1.542                 | 7.350                | 3.29e-5  | 2.008e-5 | 6      | 18  | 6.0000     | 20.3735  | AAL94624.1  Carbamoyl-phosphate synthase small chain                         |                         |    |    |   |   |   |   |
|         |                        |                      |          |          | 7      | 19  | 8.9687     | 23.2244  |                                                                              |                         |    |    |   |   |   |   |

Show detected proteins only  
 Show all proteins  
 Filter by category:

Proteins found: 1297

Enter (or paste) list of ORFs

Find ORFs

Test Cutoff

q-Value

p-Value

.005

| Signif | Direction | Applies To   |
|--------|-----------|--------------|
| yes    | +         | ratios, bars |
| no     | n/a       | bars         |
| yes    | -         | ratios, bars |
| yes    | +         | p-, q-Values |
| yes    | -         | p-, q-Values |

Dot Plots Dot Plots



Fn Summary Table FnPg vs Fn FnSg vs Fn FnPgSg vs Fn FnPgSg vs FnPg FnSg vs FnPg FnPgSg vs FnSg Fn Coverage

| Protein | FnPgSg vs Fn           |                      |          |          | Raw    |     | Normalized |          | Description                                                        | Log <sub>2</sub> Ratios |    |    |   |   |   |   |
|---------|------------------------|----------------------|----------|----------|--------|-----|------------|----------|--------------------------------------------------------------------|-------------------------|----|----|---|---|---|---|
|         | Log <sub>2</sub> Ratio | Log <sub>2</sub> Sum | q-Value  | p-Value  | FnPgSg | Fn  | FnPgSg     | Fn       |                                                                    | -6                      | -4 | -2 | 0 | 2 | 4 | 6 |
| FN0422  | -1.107                 | 13.354               | 2.957e-4 | 4.957e-4 | 69     | 125 | 69.0000    | 141.4824 | AAL94625.1  Carbamoyl-phosphate synthase large chain               |                         |    |    |   |   |   |   |
|         |                        |                      |          |          | 55     | 130 | 70.4682    | 158.9036 |                                                                    |                         |    |    |   |   |   |   |
| FN0423  | -0.906                 | 5.929                | 1.149e-2 | 4.821e-2 | 5      | 7   | 5.0000     | 7.9230   | AAL94626.1  Dihydroorotate dehydrogenase electron transfer subunit |                         |    |    |   |   |   |   |
|         |                        |                      |          |          | 5      | 11  | 6.4062     | 13.4457  |                                                                    |                         |    |    |   |   |   |   |
| FN0424  | -0.650                 | 3.820                |          |          | 3      | 4   | 3.0000     | 4.5274   | AAL94627.1  Dihydroorotate dehydrogenase                           |                         |    |    |   |   |   |   |
|         |                        |                      |          |          |        | 4   |            | 4.8893   |                                                                    |                         |    |    |   |   |   |   |
| FN0426  | 0.490                  | 8.271                | 2.317e-2 | 1.066e-1 | 25     | 10  | 25.0000    | 11.3186  | AAL94629.1  Orotidine 5'-phosphate decarboxylase                   |                         |    |    |   |   |   |   |
|         |                        |                      |          |          | 13     | 15  | 16.6561    | 18.3350  |                                                                    |                         |    |    |   |   |   |   |
| FN0427  | -0.336                 | 11.021               | 1.975e-3 | 5.97e-3  | 44     | 43  | 44.0000    | 48.6699  | AAL94630.1  Orotate phosphoribosyltransferase                      |                         |    |    |   |   |   |   |
|         |                        |                      |          |          | 29     | 44  | 37.1559    | 53.7828  |                                                                    |                         |    |    |   |   |   |   |
| FN0430  | -0.602                 | 15.497               | 3.365e-4 | 5.911e-4 | 171    | 223 | 171.0000   | 252.4045 | AAL94633.1  LSU ribosomal protein L19P                             |                         |    |    |   |   |   |   |
|         |                        |                      |          |          | 139    | 227 | 178.0923   | 277.4702 |                                                                    |                         |    |    |   |   |   |   |
| FN0435  | -0.657                 | 10.570               | 3.348e-2 | 1.637e-1 | 48     | 39  | 48.0000    | 44.1425  | AAL94634.1  Purine nucleoside phosphorylase                        |                         |    |    |   |   |   |   |
|         |                        |                      |          |          | 11     | 44  | 14.0936    | 53.7828  |                                                                    |                         |    |    |   |   |   |   |
| FN0436  | -0.470                 | 9.107                | 3.133e-2 | 1.512e-1 | 13     | 24  | 13.0000    | 27.1646  | AAL94635.1  regulator of kinase autophosphorylation inhibitor      |                         |    |    |   |   |   |   |
|         |                        |                      |          |          | 21     | 23  | 26.9060    | 28.1137  |                                                                    |                         |    |    |   |   |   |   |
| FN0437  | -0.598                 | 6.054                | 4.03e-2  | 2.03e-1  | 3      | 8   | 3.0000     | 9.0549   | AAL94636.1  kinase autophosphorylation inhibitor KipI              |                         |    |    |   |   |   |   |
|         |                        |                      |          |          | 8      | 9   | 10.2499    | 11.0010  |                                                                    |                         |    |    |   |   |   |   |
| FN0438  |                        |                      |          |          |        |     |            |          | AAL94637.1  transporter protein                                    |                         |    |    |   |   |   |   |
|         |                        |                      |          |          |        | 9   |            | 11.0010  |                                                                    |                         |    |    |   |   |   |   |
| FN0439  | -0.011                 | 11.486               | 1.562e-1 | 9.369e-1 | 58     | 41  | 58.0000    | 46.4062  | AAL94638.1  Lactam utilization protein LAMB                        |                         |    |    |   |   |   |   |
|         |                        |                      |          |          | 38     | 50  | 48.6871    | 61.1168  |                                                                    |                         |    |    |   |   |   |   |
| FN0445  | 0.077                  | 4.875                | 7.806e-2 | 4.251e-1 | 6      | 5   | 6.0000     | 5.6593   | AAL94641.1  Hypothetical protein                                   |                         |    |    |   |   |   |   |
|         |                        |                      |          |          | 4      | 4   | 5.1250     | 4.8893   |                                                                    |                         |    |    |   |   |   |   |
| FN0446  | -0.567                 | 7.518                | 1.677e-4 | 2.247e-4 | 12     | 14  | 12.0000    | 15.8460  | AAL94642.1  Hypothetical protein                                   |                         |    |    |   |   |   |   |
|         |                        |                      |          |          | 8      | 14  | 10.2499    | 17.1127  |                                                                    |                         |    |    |   |   |   |   |
| FN0447  | -0.221                 | 4.221                |          |          | 4      | 5   | 4.0000     | 5.6593   | AAL94643.1  NIFS protein                                           |                         |    |    |   |   |   |   |
|         |                        |                      |          |          |        | 3   |            | 3.6670   |                                                                    |                         |    |    |   |   |   |   |
| FN0448  |                        |                      |          |          |        |     |            |          | AAL94644.1  DNA-repair protein                                     |                         |    |    |   |   |   |   |
|         |                        |                      |          |          | 3      |     | 3.8437     |          |                                                                    |                         |    |    |   |   |   |   |
| FN0450  | -0.980                 | 9.525                | 1.959e-2 | 8.824e-2 | 22     | 22  | 22.0000    | 24.9009  | AAL94646.1  ABC transporter ATP-binding protein                    |                         |    |    |   |   |   |   |
|         |                        |                      |          |          | 13     | 42  | 16.6561    | 51.3381  |                                                                    |                         |    |    |   |   |   |   |

Show detected proteins only  
 Show all proteins  
 Filter by category:

Proteins found: 1297

Enter (or paste) list of ORFs

**Test** **Cutoff**

| Signif      | Direction | Applies To |
|-------------|-----------|------------|
| red         | yes       | +          |
| yellow      | no        | n/a        |
| green       | yes       | -          |
| pink        | yes       | +          |
| light green | yes       | -          |

ratios, bars  
ratios, bars  
ratios, bars  
p-, q-Values

| Protein | FnPgSg vs Fn           |                      |          |           | Raw    |      | Normalized |           | Description                                                                  | Log <sub>2</sub> Ratios |    |    |   |   |   |   |
|---------|------------------------|----------------------|----------|-----------|--------|------|------------|-----------|------------------------------------------------------------------------------|-------------------------|----|----|---|---|---|---|
|         | Log <sub>2</sub> Ratio | Log <sub>2</sub> Sum | q-Value  | p-Value   | FnPgSg | Fn   | FnPgSg     | Fn        |                                                                              | -6                      | -4 | -2 | 0 | 2 | 4 | 6 |
| FN0451  | -0.864                 | 5.579                |          |           |        | 10   |            | 11.3186   | AAL94647.1  Hypothetical protein                                             |                         |    |    |   |   |   |   |
|         |                        |                      |          |           | 4      | 6    | 5.1250     | 7.3340    |                                                                              | ■                       |    |    |   |   |   |   |
| FN0452  | 0.015                  | 18.716               | 9.886e-2 | 5.552e-1  | 663    | 592  | 663.0000   | 670.0605  | AAL94648.1  Glucosamine--fructose-6-phosphate aminotransferase (isomerizing) |                         |    |    |   |   |   |   |
|         |                        |                      |          |           | 512    | 520  | 655.9946   | 635.6145  |                                                                              |                         |    |    |   |   |   |   |
| FN0453  | -0.220                 | 15.291               | 4.987e-3 | 1.819e-2  | 198    | 195  | 198.0000   | 220.7125  | AAL94649.1  Xaa-Pro aminopeptidase                                           |                         |    |    |   |   |   |   |
|         |                        |                      |          |           | 135    | 173  | 172.9673   | 211.4640  |                                                                              | ■                       |    |    |   |   |   |   |
| FN0454  | -0.507                 | 12.316               | 4.712e-5 | 3.749e-5  | 57     | 77   | 57.0000    | 87.1531   | AAL94650.1  Aldehyde dehydrogenase B                                         |                         |    |    |   |   |   |   |
|         |                        |                      |          |           | 49     | 68   | 62.7807    | 83.1188   |                                                                              | ■                       |    |    |   |   |   |   |
| FN0455  | 1.180                  | 16.037               | 2.472e-3 | 7.79e-3   | 331    | 150  | 331.0000   | 169.7788  | AAL94651.1  Rubrerythrin                                                     |                         |    |    |   |   |   |   |
|         |                        |                      |          |           | 351    | 143  | 449.7150   | 174.7940  |                                                                              | ■                       |    |    |   |   |   |   |
| FN0456  | -1.123                 | 11.157               | 2.866e-5 | 1.568e-5  | 34     | 62   | 34.0000    | 70.1753   | AAL94652.1  Hypothetical cytosolic protein                                   |                         |    |    |   |   |   |   |
|         |                        |                      |          |           | 24     | 58   | 30.7497    | 70.8955   |                                                                              | ■                       |    |    |   |   |   |   |
| FN0458  | 0.645                  | 4.714                |          |           |        | 4    |            | 4.5274    | AAL94654.1  Hypothetical Exported Protein                                    |                         |    |    |   |   |   |   |
|         |                        |                      |          |           | 5      | 3    | 6.4062     | 3.6670    |                                                                              | ■                       |    |    |   |   |   |   |
| FN0459  |                        |                      |          |           |        | 8    |            | 9.0549    | AAL94655.1  Hypothetical exported 24-amino acid repeat protein               |                         |    |    |   |   |   |   |
|         |                        |                      |          |           |        | 8    |            | 9.7787    |                                                                              |                         |    |    |   |   |   |   |
| FN0460  | -1.497                 | 10.305               | 6.626e-5 | 6.025e-5  | 18     | 57   | 18.0000    | 64.5160   | AAL94656.1  Delta-aminolevulinic acid dehydratase                            |                         |    |    |   |   |   |   |
|         |                        |                      |          |           | 19     | 45   | 24.3435    | 55.0051   |                                                                              | ■                       |    |    |   |   |   |   |
| FN0461  | -0.409                 | 15.695               | 3.45e-4  | 6.121e-4  | 187    | 227  | 187.0000   | 256.9320  | AAL94657.1  Probable sigma(54) modulation protein                            |                         |    |    |   |   |   |   |
|         |                        |                      |          |           | 166    | 224  | 212.6857   | 273.8032  |                                                                              | ■                       |    |    |   |   |   |   |
| FN0462  | -1.400                 | 9.521                | 1.37e-6  | 2.122e-7  | 18     | 40   | 18.0000    | 45.2744   | AAL94658.1  DNA mismatch repair protein mutL                                 |                         |    |    |   |   |   |   |
|         |                        |                      |          |           | 12     | 35   | 15.3749    | 42.7817   |                                                                              | ■                       |    |    |   |   |   |   |
| FN0465  | -1.256                 | 14.564               | 4.782e-4 | 9.431e-4  | 104    | 195  | 104.0000   | 220.7125  | AAL94661.1  Hypothetical protein                                             |                         |    |    |   |   |   |   |
|         |                        |                      |          |           | 76     | 213  | 97.3742    | 260.3575  |                                                                              | ■                       |    |    |   |   |   |   |
| FN0466  | -0.060                 | 16.914               | 1.128e-1 | 6.434e-1  | 295    | 323  | 295.0000   | 365.5904  | AAL94662.1  Lysyl-tRNA synthetase                                            |                         |    |    |   |   |   |   |
|         |                        |                      |          |           | 307    | 288  | 393.3405   | 352.0326  |                                                                              | ■                       |    |    |   |   |   |   |
| FN0470  | -0.264                 | 17.849               | 9.081e-3 | 3.685e-2  | 427    | 430  | 427.0000   | 486.6993  | AAL94666.1  Putative efflux pump component MtrF                              |                         |    |    |   |   |   |   |
|         |                        |                      |          |           | 359    | 473  | 459.9650   | 578.1647  |                                                                              | ■                       |    |    |   |   |   |   |
| FN0472  | 1.747                  | 24.324               | 1.612e-8 | 2.726e-10 | 8444   | 2271 | 8444.0000  | 2570.4517 | AAL94668.1  Flavodoxin                                                       |                         |    |    |   |   |   |   |
|         |                        |                      |          |           | 6518   | 1990 | 8351.1187  | 2432.4477 |                                                                              | ■                       |    |    |   |   |   |   |
| FN0474  |                        |                      |          |           |        | 6    |            | 7.3340    | AAL94670.1  Acriflavin resistance protein B                                  |                         |    |    |   |   |   |   |
|         |                        |                      |          |           |        |      |            |           |                                                                              |                         |    |    |   |   |   |   |

Show detected proteins only  
 Show all proteins  
 Filter by category:

Proteins found: 1297

Enter (or paste) list of ORFs

Find ORFs

Test Cutoff

q-Value p-Value

.005

| Signif | Direction | Applies To   |
|--------|-----------|--------------|
| ■      | +         | ratios, bars |
| ■      | n/a       | bars         |
| ■      | -         | ratios, bars |
| ■      | +         | p-, q-Values |
| ■      | -         |              |

Dot Plots Dot Plots

| Protein | FnPgSg vs Fn           |                      |          |          | Raw    |      | Normalized |           | Description                                           | Log <sub>2</sub> Ratios |    |    |   |   |   |   |
|---------|------------------------|----------------------|----------|----------|--------|------|------------|-----------|-------------------------------------------------------|-------------------------|----|----|---|---|---|---|
|         | Log <sub>2</sub> Ratio | Log <sub>2</sub> Sum | q-Value  | p-Value  | FnPgSg | Fn   | FnPgSg     | Fn        |                                                       | -6                      | -4 | -2 | 0 | 2 | 4 | 6 |
| FN0475  | -2.051                 | 9.760                | 1.464e-4 | 1.867e-4 | 11     | 53   | 11.0000    | 59.9885   | AAL94671.1  MIAB protein                              |                         |    |    |   |   |   |   |
|         |                        |                      |          |          | 14     | 49   | 17.9374    | 59.8944   |                                                       |                         |    |    |   |   |   |   |
| FN0476  | 0.349                  | 12.079               | 2.206e-3 | 6.801e-3 | 69     | 49   | 69.0000    | 55.4611   | AAL94672.1  Transcription termination factor rho      |                         |    |    |   |   |   |   |
|         |                        |                      |          |          | 62     | 50   | 79.4368    | 61.1168   |                                                       |                         |    |    |   |   |   |   |
| FN0477  | -2.734                 | 9.591                | 5.255e-6 | 1.223e-6 | 10     | 65   | 10.0000    | 73.5708   | AAL94673.1  Cell wall endopeptidase family M23/M37    |                         |    |    |   |   |   |   |
|         |                        |                      |          |          | 9      | 57   | 11.5312    | 69.6731   |                                                       |                         |    |    |   |   |   |   |
| FN0478  | -0.326                 | 6.924                | 2.915e-2 | 1.388e-1 | 12     | 11   | 12.0000    | 12.4504   | AAL94674.1  GcpE protein                              |                         |    |    |   |   |   |   |
|         |                        |                      |          |          | 6      | 10   | 7.6874     | 12.2234   |                                                       |                         |    |    |   |   |   |   |
| FN0481  |                        |                      |          |          |        | 11   |            | 12.4504   | AAL94677.1  unknown                                   |                         |    |    |   |   |   |   |
|         |                        |                      |          |          |        | 17   |            | 20.7797   |                                                       |                         |    |    |   |   |   |   |
| FN0482  | 0.455                  | 10.977               | 2.631e-2 | 1.232e-1 | 59     | 44   | 59.0000    | 49.8018   | AAL94678.1  LSU ribosomal protein L31P                |                         |    |    |   |   |   |   |
|         |                        |                      |          |          | 36     | 22   | 46.1246    | 26.8914   |                                                       |                         |    |    |   |   |   |   |
| FN0483  | -0.298                 | 13.739               | 1.011e-3 | 2.428e-3 | 111    | 120  | 111.0000   | 135.8231  | AAL94679.1  Uracil phosphoribosyltransferase          |                         |    |    |   |   |   |   |
|         |                        |                      |          |          | 78     | 101  | 99.9367    | 123.4559  |                                                       |                         |    |    |   |   |   |   |
| FN0484  | -1.179                 | 5.179                |          |          | 4      | 8    | 4.0000     | 9.0549    | AAL94680.1  Lipase                                    |                         |    |    |   |   |   |   |
|         |                        |                      |          |          |        |      |            |           |                                                       |                         |    |    |   |   |   |   |
| FN0487  | -0.002                 | 20.199               | 1.601e-1 | 9.651e-1 | 1065   | 933  | 1065.0000  | 1056.0244 | AAL94683.1  2-hydroxyglutarate dehydrogenase          |                         |    |    |   |   |   |   |
|         |                        |                      |          |          | 880    | 932  | 1127.4907  | 1139.2167 |                                                       |                         |    |    |   |   |   |   |
| FN0488  | 0.232                  | 23.279               | 6.43e-3  | 2.463e-2 | 3228   | 2530 | 3228.0000  | 2863.6031 | AAL94684.1  NAD-specific glutamate dehydrogenase      |                         |    |    |   |   |   |   |
|         |                        |                      |          |          | 2879   | 2474 | 3688.6884  | 3024.0580 |                                                       |                         |    |    |   |   |   |   |
| FN0489  | 0.489                  | 9.576                | 9.597e-3 | 3.936e-2 | 36     | 25   | 36.0000    | 28.2965   | AAL94685.1  Prolipoprotein diacylglyceryl transferase |                         |    |    |   |   |   |   |
|         |                        |                      |          |          | 23     | 15   | 29.4685    | 18.3350   |                                                       |                         |    |    |   |   |   |   |
| FN0490  |                        |                      |          |          |        | 4    |            | 4.8893    | AAL94686.1  Integral membrane protein                 |                         |    |    |   |   |   |   |
|         |                        |                      |          |          |        |      |            |           |                                                       |                         |    |    |   |   |   |   |
| FN0491  | -0.523                 | 10.891               | 3.977e-2 | 1.999e-1 | 33     | 61   | 33.0000    | 69.0434   | AAL94687.1  Alanine racemase                          |                         |    |    |   |   |   |   |
|         |                        |                      |          |          | 31     | 29   | 39.7184    | 35.4477   |                                                       |                         |    |    |   |   |   |   |
| FN0493  | -2.267                 | 6.556                | 9.329e-4 | 2.185e-3 | 5      | 16   | 5.0000     | 18.1097   | AAL94689.1  Hypothetical protein                      |                         |    |    |   |   |   |   |
|         |                        |                      |          |          | 3      | 20   | 3.8437     | 24.4467   |                                                       |                         |    |    |   |   |   |   |
| FN0494  | -0.350                 | 17.923               | 1.919e-3 | 5.765e-3 | 409    | 464  | 409.0000   | 525.1826  | AAL94690.1  Short chain dehydrogenase                 |                         |    |    |   |   |   |   |
|         |                        |                      |          |          | 370    | 491  | 474.0586   | 600.1667  |                                                       |                         |    |    |   |   |   |   |
| FN0495  | 0.423                  | 24.896               | 3.67e-5  | 2.497e-5 | 6337   | 4420 | 6337.0000  | 5002.8166 | AAL94691.1  Acetyl-CoA acetyltransferase              |                         |    |    |   |   |   |   |
|         |                        |                      |          |          | 5153   | 3801 | 6602.2269  | 4646.0973 |                                                       |                         |    |    |   |   |   |   |

Show detected proteins only  
 Show all proteins  
 Filter by category:

Proteins found: 1297

Enter (or paste) list of ORFs

Find ORFs

Test Cutoff

q-Value p-Value

.005

| Signif | Direction | Applies To   |
|--------|-----------|--------------|
| yes    | +         | ratios, bars |
| no     | n/a       | bars         |
| yes    | -         | ratios, bars |
| yes    | +         | p-, q-Values |
| yes    | -         | p-, q-Values |

Dot Plots Dot Plots

Fn Summary Table FnPg vs Fn FnSg vs Fn FnPgSg vs Fn FnPgSg vs FnPg FnSg vs FnPg FnPgSg vs FnSg Fn Coverage

| Protein       | FnPgSg vs Fn           |                      |          |          | Raw    |     | Normalized |          | Description                                                    | Log <sub>2</sub> Ratios      |    |    |   |   |   |   |
|---------------|------------------------|----------------------|----------|----------|--------|-----|------------|----------|----------------------------------------------------------------|------------------------------|----|----|---|---|---|---|
|               | Log <sub>2</sub> Ratio | Log <sub>2</sub> Sum | q-Value  | p-Value  | FnPgSg | Fn  | FnPgSg     | Fn       |                                                                | -6                           | -4 | -2 | 0 | 2 | 4 | 6 |
| <b>FN0496</b> |                        |                      |          |          |        | 6   |            | 7.3340   | AAL94692.1  unknown                                            |                              |    |    |   |   |   |   |
| <b>FN0497</b> |                        |                      |          |          |        | 5   |            | 6.4062   | AAL94693.1  Plasmid addiction system poison protein            |                              |    |    |   |   |   |   |
| <b>FN0501</b> | -0.572                 | 15.318               | 1.268e-3 | 3.314e-3 | 156    | 199 | 156.0000   | 225.2399 | AAL94697.1  Ornithine decarboxylase                            |                              |    |    |   |   |   |   |
| <b>FN0502</b> | 1.159                  | 7.811                | 1.78e-5  | 7.62e-6  | 23     | 8   | 23.0000    | 9.0549   | AAL94698.1  Phosphoheptose isomerase                           |                              |    |    |   |   |   |   |
| <b>FN0503</b> | -0.137                 | 11.289               | 2.524e-2 | 1.175e-1 | 48     | 43  | 48.0000    | 48.6699  | AAL94699.1  Transcriptional regulatory protein, LYSR family    |                              |    |    |   |   |   |   |
| <b>FN0504</b> |                        |                      |          |          |        | 3   |            | 3.8437   | AAL94700.1  Arginine permease                                  |                              |    |    |   |   |   |   |
| <b>FN0505</b> | -0.498                 | 9.628                | 3.89e-4  | 7.23e-4  | 23     | 31  | 23.0000    | 35.0876  | AAL94701.1  Anthranilate synthase component II                 |                              |    |    |   |   |   |   |
| <b>FN0506</b> | 0.209                  | 15.637               | 4.281e-2 | 2.173e-1 | 279    | 182 | 279.0000   | 205.9983 | AAL94702.1  Arginyl-tRNA synthetase                            |                              |    |    |   |   |   |   |
| <b>FN0511</b> | -0.866                 | 9.704                | 2.724e-3 | 8.769e-3 | 21     | 30  | 21.0000    | 33.9558  | AAL94707.1  D-lactate dehydrogenase                            |                              |    |    |   |   |   |   |
| <b>FN0512</b> | 0.175                  | 15.036               | 4.996e-3 | 1.823e-2 | 196    | 145 | 196.0000   | 164.1195 | AAL94708.1  Flavoprotein                                       |                              |    |    |   |   |   |   |
| <b>FN0513</b> | 0.391                  | 10.668               | 3.591e-5 | 2.388e-5 | 45     | 32  | 45.0000    | 36.2195  | AAL94709.1  Flavodoxin                                         |                              |    |    |   |   |   |   |
| <b>FN0515</b> |                        |                      |          |          |        | 4   |            | 4.5274   | AAL94711.1  Acriflavin resistance protein D                    |                              |    |    |   |   |   |   |
| <b>FN0519</b> | -1.396                 | 5.281                |          |          |        | 6   |            | 6.7912   | AAL94715.1  Hypothetical exported 24-amino acid repeat protein |                              |    |    |   |   |   |   |
| <b>FN0522</b> | -0.444                 | 4.329                |          |          |        | 6   |            | 6.7912   | AAL94718.1  Exonuclease SBCC                                   |                              |    |    |   |   |   |   |
| <b>FN0523</b> |                        |                      |          |          |        | 3   | 3          | 3.8437   | 3.6670                                                         | AAL94719.1  Exonuclease SBCD |    |    |   |   |   |   |
| <b>FN0524</b> |                        |                      |          |          |        | 17  |            | 17.0000  |                                                                | AAL94720.1  DNA helicase II  |    |    |   |   |   |   |

Show detected proteins only  
 Show all proteins  
 Filter by category:

Proteins found: 1297

Enter (or paste) list of ORFs

Find ORFs

Test Cutoff

q-Value .005

p-Value

| Signif | Direction | Applies To   |
|--------|-----------|--------------|
| yes    | +         | ratios, bars |
| no     | n/a       | bars         |
| yes    | -         | ratios, bars |
| yes    | +         | p-, q-Values |
| yes    | -         |              |

Dot Plots Dot Plots

Fn Summary Table FnPg vs Fn FnSg vs Fn FnPgSg vs Fn FnPgSg vs FnPg FnSg vs FnPg FnPgSg vs FnSg Fn Coverage

| Protein | FnPgSg vs Fn           |                      |          |          | Raw    |      | Normalized |           | Description                                                   | Log <sub>2</sub> Ratios |    |    |   |   |
|---------|------------------------|----------------------|----------|----------|--------|------|------------|-----------|---------------------------------------------------------------|-------------------------|----|----|---|---|
|         | Log <sub>2</sub> Ratio | Log <sub>2</sub> Sum | q-Value  | p-Value  | FnPgSg | Fn   | FnPgSg     | Fn        |                                                               | -6                      | -4 | -2 | 0 | 2 |
| FN0525  | -0.997                 | 14.733               | 2.544e-5 | 1.291e-5 | 108    | 196  | 108.0000   | 221.8444  | AAL94721.1  Penicillin-binding protein                        |                         |    |    |   |   |
|         |                        |                      |          |          | 98     | 200  | 125.5615   | 244.4671  |                                                               |                         |    |    |   |   |
| FN0526  | -0.169                 | 10.723               | 3.901e-2 | 1.955e-1 | 34     | 36   | 34.0000    | 40.7469   | AAL94722.1  Florfenicol resistance protein                    |                         |    |    |   |   |
|         |                        |                      |          |          | 34     | 38   | 43.5621    | 46.4487   |                                                               |                         |    |    |   |   |
| FN0527  | -0.976                 | 7.656                | 7.51e-4  | 1.665e-3 | 10     | 19   | 10.0000    | 21.5053   | AAL94723.1  Alanyl-tRNA synthetase                            |                         |    |    |   |   |
|         |                        |                      |          |          | 8      | 15   | 10.2499    | 18.3350   |                                                               |                         |    |    |   |   |
| FN0528  | -0.907                 | 20.473               | 7.938e-5 | 7.754e-5 | 951    | 1436 | 951.0000   | 1625.3495 | AAL94724.1  Cold shock protein                                |                         |    |    |   |   |
|         |                        |                      |          |          | 633    | 1373 | 811.0246   | 1678.2667 |                                                               |                         |    |    |   |   |
| FN0535  | 1.124                  | 10.896               | 7.88e-5  | 7.674e-5 | 61     | 22   | 61.0000    | 24.9009   | AAL94731.1  Hypothetical protein                              |                         |    |    |   |   |
|         |                        |                      |          |          | 53     | 28   | 67.9057    | 34.2254   |                                                               |                         |    |    |   |   |
| FN0536  | 0.227                  | 15.611               | 3.896e-5 | 2.846e-5 | 242    | 184  | 242.0000   | 208.2620  | AAL94732.1  DNA polymerase III, beta chain                    |                         |    |    |   |   |
|         |                        |                      |          |          | 189    | 168  | 242.1543   | 205.3524  |                                                               |                         |    |    |   |   |
| FN0540  | -0.795                 | 10.965               | 1.277e-4 | 1.538e-4 | 32     | 49   | 32.0000    | 55.4611   | AAL94736.1  Glutamate-1-semialdehyde 2,1-aminomutase          |                         |    |    |   |   |
|         |                        |                      |          |          | 28     | 51   | 35.8747    | 62.3391   |                                                               |                         |    |    |   |   |
| FN0541  |                        |                      |          |          |        | 6    |            | 6.7912    | AAL94737.1  polysaccharide deacetylase                        |                         |    |    |   |   |
|         |                        |                      |          |          |        | 15   |            | 18.3350   |                                                               |                         |    |    |   |   |
| FN0542  | 0.228                  | 7.946                |          |          | 17     | 17   | 17.0000    | 19.2416   | AAL94738.1  Beta 1,4 glucosyltransferase                      |                         |    |    |   |   |
|         |                        |                      |          |          |        |      | 8          |           |                                                               |                         |    |    |   |   |
| FN0543  | -0.931                 | 10.280               | 3.401e-5 | 2.141e-5 | 28     | 45   | 28.0000    | 50.9337   | AAL94739.1  Lipopolysaccharide heptosyltransferase-1          |                         |    |    |   |   |
|         |                        |                      |          |          | 18     | 38   | 23.0623    | 46.4487   |                                                               |                         |    |    |   |   |
| FN0546  |                        |                      |          |          |        | 6    |            | 6.7912    | AAL94742.1  Lipopolysaccharide core biosynthesis protein rfaQ |                         |    |    |   |   |
|         |                        |                      |          |          |        |      |            |           |                                                               |                         |    |    |   |   |
| FN0547  | -0.841                 | 17.021               | 1.858e-3 | 5.534e-3 | 326    | 425  | 326.0000   | 481.0401  | AAL94743.1  RecA protein                                      |                         |    |    |   |   |
|         |                        |                      |          |          | 171    | 405  | 219.0919   | 495.0459  |                                                               |                         |    |    |   |   |
| FN0549  |                        |                      |          |          |        |      |            | 3.6670    | AAL94745.1  O-sialoglycoprotein endopeptidase                 |                         |    |    |   |   |
|         |                        |                      |          |          |        | 3    |            |           |                                                               |                         |    |    |   |   |
| FN0550  |                        |                      |          |          | 18     |      | 18.0000    |           | AAL94746.1  hypothetical Protein                              |                         |    |    |   |   |
|         |                        |                      |          |          |        |      |            |           |                                                               |                         |    |    |   |   |
| FN0552  | -1.197                 | 6.812                |          |          | 7      | 10   | 7.0000     | 11.3186   | AAL94748.1  Serine racemase                                   |                         |    |    |   |   |
|         |                        |                      |          |          |        |      |            | 17        |                                                               |                         |    |    |   |   |
| FN0553  | -0.155                 | 12.692               | 3.125e-2 | 1.508e-1 | 85     | 75   | 85.0000    | 84.8894   | AAL94749.1  D-serine dehydratase                              |                         |    |    |   |   |
|         |                        |                      |          |          | 54     | 71   | 69.1869    | 86.7858   |                                                               |                         |    |    |   |   |

Show detected proteins only

Show all proteins

Filter by category:

GO: amino acid transport

Proteins found: 1297

Enter (or paste) list of ORFs

Find ORFs

Test Cutoff

q-Value

p-Value

.005

| Signif | Direction | Applies To   |
|--------|-----------|--------------|
| yes    | +         | ratios, bars |
| no     | n/a       | bars         |
| yes    | -         | ratios, bars |
| yes    | +         | p-, q-Values |
| yes    | -         | p-, q-Values |

Dot Plots Dot Plots

| Protein | FnPgSg vs Fn           |                      |          |          | Raw    |     | Normalized |          | Description                                                                         | Log <sub>2</sub> Ratios |    |    |   |   |   |   |
|---------|------------------------|----------------------|----------|----------|--------|-----|------------|----------|-------------------------------------------------------------------------------------|-------------------------|----|----|---|---|---|---|
|         | Log <sub>2</sub> Ratio | Log <sub>2</sub> Sum | q-Value  | p-Value  | FnPgSg | Fn  | FnPgSg     | Fn       |                                                                                     | -6                      | -4 | -2 | 0 | 2 | 4 | 6 |
| FN0554  | -0.705                 | 3.875                |          |          | 3      |     | 3.0000     |          | AAL94750.1  D-serine permease                                                       |                         |    |    |   |   |   |   |
|         |                        |                      |          |          |        | 4   |            | 4.8893   |                                                                                     |                         |    |    |   |   |   |   |
| FN0556  | -2.016                 | 10.209               | 3.889e-5 | 2.836e-5 | 15     | 65  | 15.0000    | 73.5708  | AAL94752.1  unknown                                                                 |                         |    |    |   |   |   |   |
|         |                        |                      |          |          | 15     | 53  | 19.2186    | 64.7838  |                                                                                     |                         |    |    |   |   |   |   |
| FN0557  | -0.995                 | 10.065               | 2.426e-3 | 7.614e-3 | 31     | 46  | 31.0000    | 52.0655  | AAL94753.1  unknown                                                                 |                         |    |    |   |   |   |   |
|         |                        |                      |          |          | 12     | 33  | 15.3749    | 40.3371  |                                                                                     |                         |    |    |   |   |   |   |
| FN0558  | -1.116                 | 10.697               | 1.296e-4 | 1.57e-4  | 31     | 52  | 31.0000    | 58.8567  | AAL94754.1  TraT complement resistance protein precursor                            |                         |    |    |   |   |   |   |
|         |                        |                      |          |          | 19     | 50  | 24.3435    | 61.1168  |                                                                                     |                         |    |    |   |   |   |   |
| FN0559  | 0.204                  | 13.574               | 4.672e-2 | 2.397e-1 | 100    | 90  | 100.0000   | 101.8673 | AAL94755.1  Phosphoglucomutase                                                      |                         |    |    |   |   |   |   |
|         |                        |                      |          |          | 107    | 85  | 137.0926   | 103.8985 |                                                                                     |                         |    |    |   |   |   |   |
| FN0561  | -0.851                 | 10.190               | 1.578e-5 | 6.215e-6 | 24     | 39  | 24.0000    | 44.1425  | AAL94757.1  Proline synthetase associated protein                                   |                         |    |    |   |   |   |   |
|         |                        |                      |          |          | 21     | 39  | 26.9060    | 47.6711  |                                                                                     |                         |    |    |   |   |   |   |
| FN0562  | 0.267                  | 14.159               | 8.121e-3 | 3.229e-2 | 157    | 98  | 157.0000   | 110.9222 | AAL94758.1  Hypothetical cytosolic protein                                          |                         |    |    |   |   |   |   |
|         |                        |                      |          |          | 109    | 111 | 139.6551   | 135.6792 |                                                                                     |                         |    |    |   |   |   |   |
| FN0563  | -1.470                 | 7.713                | 5.619e-4 | 1.157e-3 | 11     | 21  | 11.0000    | 23.7690  | AAL94759.1  putative tRNA (5-methylaminomethyl-2-thiouridylate) - methyltransferase |                         |    |    |   |   |   |   |
|         |                        |                      |          |          | 5      | 20  | 6.4062     | 24.4467  |                                                                                     |                         |    |    |   |   |   |   |
| FN0574  | 0.236                  | 3.764                |          |          | 4      | 3   | 4.0000     | 3.3956   | AAL94770.1  Hypothetical cytosolic protein                                          |                         |    |    |   |   |   |   |
|         |                        |                      |          |          |        |     |            |          |                                                                                     |                         |    |    |   |   |   |   |
| FN0576  | -1.044                 | 11.064               | 9.375e-4 | 2.199e-3 | 26     | 58  | 26.0000    | 65.6478  | AAL94772.1  hypothetical protein                                                    |                         |    |    |   |   |   |   |
|         |                        |                      |          |          | 30     | 55  | 38.4372    | 67.2285  |                                                                                     |                         |    |    |   |   |   |   |
| FN0577  |                        |                      |          |          |        |     |            |          | AAL94773.1  Hypothetical protein                                                    |                         |    |    |   |   |   |   |
|         |                        |                      |          |          |        | 4   |            | 4.8893   |                                                                                     |                         |    |    |   |   |   |   |
| FN0579  | -0.091                 | 17.086               | 9.155e-3 | 3.72e-2  | 350    | 341 | 350.0000   | 385.9639 | AAL94775.1  Hypothetical cytosolic protein                                          |                         |    |    |   |   |   |   |
|         |                        |                      |          |          | 291    | 314 | 372.8407   | 383.8133 |                                                                                     |                         |    |    |   |   |   |   |
| FN0580  |                        |                      |          |          |        |     |            |          | AAL94776.1  Penicillin-binding protein                                              |                         |    |    |   |   |   |   |
|         |                        |                      |          |          |        | 21  |            | 23.7690  |                                                                                     |                         |    |    |   |   |   |   |
| FN0581  | -1.448                 | 6.807                |          |          |        |     |            |          | AAL94777.1  Lipoprotein releasing system transmembrane protein l0E                  |                         |    |    |   |   |   |   |
|         |                        |                      |          |          | 5      | 11  | 6.4062     | 13.4457  |                                                                                     |                         |    |    |   |   |   |   |
| FN0582  | -1.230                 | 9.787                | 1.291e-3 | 3.398e-3 | 26     | 34  | 26.0000    | 38.4832  | AAL94778.1  Lipoprotein releasing system ATP-binding protein l0D                    |                         |    |    |   |   |   |   |
|         |                        |                      |          |          | 10     | 43  | 12.8124    | 52.5604  |                                                                                     |                         |    |    |   |   |   |   |
| FN0583  |                        |                      |          |          |        |     |            |          | AAL94779.1  Hypothetical Exported Protein                                           |                         |    |    |   |   |   |   |
|         |                        |                      |          |          |        | 7   |            | 7.9230   |                                                                                     |                         |    |    |   |   |   |   |

Show detected proteins only  
 Show all proteins  
 Filter by category:

Proteins found:  
 1297

Enter (or paste) list of ORFs

Test Cutoff

| Signif      | Direction | Applies To |
|-------------|-----------|------------|
| red         | yes       | +          |
| yellow      | no        | n/a        |
| green       | yes       | -          |
| pink        | yes       | +          |
| light green | yes       | -          |

Fn Summary Table FnPg vs Fn FnSg vs Fn FnPgSg vs Fn FnPgSg vs FnPg FnSg vs FnPg FnPgSg vs FnSg Fn Coverage

| Protein | FnPgSg vs Fn           |                      |          |          | Raw    |     | Normalized |          | Description                                                                       | Log <sub>2</sub> Ratios |    |    |   |   |   |   |
|---------|------------------------|----------------------|----------|----------|--------|-----|------------|----------|-----------------------------------------------------------------------------------|-------------------------|----|----|---|---|---|---|
|         | Log <sub>2</sub> Ratio | Log <sub>2</sub> Sum | q-Value  | p-Value  | FnPgSg | Fn  | FnPgSg     | Fn       |                                                                                   | -6                      | -4 | -2 | 0 | 2 | 4 | 6 |
| FN0585  | -1.050                 | 5.050                |          |          | 4      | 6   | 4.0000     | 6.7912   | AAL94781.1  Two-component response regulator czcR                                 |                         |    |    |   |   |   |   |
|         |                        |                      |          |          |        | 8   |            | 9.7787   |                                                                                   |                         |    |    |   |   |   |   |
| FN0586  | -0.720                 | 4.720                |          |          | 4      | 3   | 4.0000     | 3.3956   | AAL94782.1  Two-component sensor kinase czcS                                      |                         |    |    |   |   |   |   |
|         |                        |                      |          |          |        | 8   |            | 9.7787   |                                                                                   |                         |    |    |   |   |   |   |
| FN0590  | -1.114                 | 6.380                | 3.959e-3 | 1.375e-2 | 6      | 14  | 6.0000     | 15.8460  | AAL94786.1  N-acyl-L-amino acid amidohydrolase                                    |                         |    |    |   |   |   |   |
|         |                        |                      |          |          | 5      | 9   | 6.4062     | 11.0010  |                                                                                   |                         |    |    |   |   |   |   |
| FN0592  | -0.765                 | 12.472               | 9.214e-4 | 2.15e-3  | 49     | 84  | 49.0000    | 95.0762  | AAL94788.1  ATP-dependent DNA helicase pcrA                                       |                         |    |    |   |   |   |   |
|         |                        |                      |          |          | 52     | 83  | 66.6245    | 101.4538 |                                                                                   |                         |    |    |   |   |   |   |
| FN0593  | 0.036                  | 10.928               | 1.128e-1 | 6.434e-1 | 42     | 36  | 42.0000    | 40.7469  | AAL94789.1  UDP-3-O-[3-hydroxymyristoyl] N-acetylglucosamine deacetylase          |                         |    |    |   |   |   |   |
|         |                        |                      |          |          | 37     | 38  | 47.4059    | 46.4487  |                                                                                   |                         |    |    |   |   |   |   |
| FN0594  | 0.014                  | 5.986                |          |          | 8      | 7   | 8.0000     | 7.9230   | AAL94790.1  (3R)-hydroxymyristoyl-[acyl carrier protein] dehydratase              |                         |    |    |   |   |   |   |
|         |                        |                      |          |          |        |     |            |          |                                                                                   |                         |    |    |   |   |   |   |
| FN0595  | 0.824                  | 9.288                | 5.432e-2 | 2.84e-1  | 14     | 17  | 14.0000    | 19.2416  | AAL94791.1  Acyl-[acyl-carrier-protein]-UDP-N-acetylglucosamine O-acyltransferase |                         |    |    |   |   |   |   |
|         |                        |                      |          |          | 41     | 15  | 52.5308    | 18.3350  |                                                                                   |                         |    |    |   |   |   |   |
| FN0596  | -1.328                 | 8.498                |          |          | 12     | 23  | 12.0000    | 26.0328  | AAL94792.1  Hypothetical protein                                                  |                         |    |    |   |   |   |   |
|         |                        |                      |          |          |        | 28  |            | 34.2254  |                                                                                   |                         |    |    |   |   |   |   |
| FN0597  | -1.240                 | 9.009                | 1.167e-3 | 2.945e-3 | 18     | 26  | 18.0000    | 29.4283  | AAL94793.1  Lipid-A-disaccharide synthase                                         |                         |    |    |   |   |   |   |
|         |                        |                      |          |          | 9      | 33  | 11.5312    | 40.3371  |                                                                                   |                         |    |    |   |   |   |   |
| FN0598  | -0.350                 | 9.446                | 1.566e-2 | 6.843e-2 | 25     | 30  | 25.0000    | 33.9558  | AAL94794.1  Phospholipid-lipopolysaccharide ABC transporter                       |                         |    |    |   |   |   |   |
|         |                        |                      |          |          | 17     | 21  | 21.7811    | 25.6690  |                                                                                   |                         |    |    |   |   |   |   |
| FN0600  | 0.162                  | 12.539               | 5.949e-2 | 3.142e-1 | 94     | 63  | 94.0000    | 71.3071  | AAL94796.1  Hypothetical protein                                                  |                         |    |    |   |   |   |   |
|         |                        |                      |          |          | 54     | 61  | 69.1869    | 74.5625  |                                                                                   |                         |    |    |   |   |   |   |
| FN0601  |                        |                      |          |          |        | 31  |            | 35.0876  | AAL94797.1  Hypothetical exported 24-amino acid repeat protein                    |                         |    |    |   |   |   |   |
|         |                        |                      |          |          |        | 27  |            | 33.0031  |                                                                                   |                         |    |    |   |   |   |   |
| FN0602  | -0.483                 | 14.163               | 1.868e-4 | 2.623e-4 | 110    | 148 | 110.0000   | 167.5151 | AAL94798.1  Hypothetical protein                                                  |                         |    |    |   |   |   |   |
|         |                        |                      |          |          | 93     | 125 | 119.1553   | 152.7919 |                                                                                   |                         |    |    |   |   |   |   |
| FN0603  |                        |                      |          |          |        |     |            |          | AAL94799.1  Transcriptional regulatory protein, LYSR family                       |                         |    |    |   |   |   |   |
|         |                        |                      |          |          |        | 4   |            | 4.8893   |                                                                                   |                         |    |    |   |   |   |   |
| FN0605  |                        |                      |          |          |        |     |            |          | AAL94801.1  Aspartate aminotransferase                                            |                         |    |    |   |   |   |   |
|         |                        |                      |          |          | 5      |     | 6.4062     |          |                                                                                   |                         |    |    |   |   |   |   |
| FN0608  | 0.080                  | 10.922               | 2.224e-2 | 1.017e-1 | 47     | 39  | 47.0000    | 44.1425  | AAL94804.1  Exoribonuclease II                                                    |                         |    |    |   |   |   |   |
|         |                        |                      |          |          | 34     | 34  | 43.5621    | 41.5594  |                                                                                   |                         |    |    |   |   |   |   |

Show detected proteins only  
 Show all proteins  
 Filter by category:

Proteins found: 1297

Enter (or paste) list of ORFs

Find ORFs

Test Cutoff

q-Value p-Value

.005

| Signif | Direction | Applies To   |
|--------|-----------|--------------|
| yes    | +         | ratios, bars |
| no     | n/a       | bars         |
| yes    | -         | ratios, bars |
| yes    | +         | p-, q-Values |
| yes    | -         | p-, q-Values |

Dot Plots Dot Plots

Fn Summary Table FnPg vs Fn FnSg vs Fn FnPgSg vs Fn FnPgSg vs FnPg FnSg vs FnPg FnPgSg vs FnSg Fn Coverage

| Protein | FnPgSg vs Fn           |                      |          |          | Raw    |     | Normalized |          | Description                                                                  | Log <sub>2</sub> Ratios |    |    |   |   |   |   |
|---------|------------------------|----------------------|----------|----------|--------|-----|------------|----------|------------------------------------------------------------------------------|-------------------------|----|----|---|---|---|---|
|         | Log <sub>2</sub> Ratio | Log <sub>2</sub> Sum | q-Value  | p-Value  | FnPgSg | Fn  | FnPgSg     | Fn       |                                                                              | -6                      | -4 | -2 | 0 | 2 | 4 | 6 |
| FN0610  | -0.543                 | 15.636               | 2.075e-4 | 3.071e-4 | 201    | 248 | 201.0000   | 280.7010 | AAL94806.1  unknown                                                          |                         |    |    |   |   |   |   |
|         |                        |                      |          |          | 135    | 216 | 172.9673   | 264.0245 |                                                                              |                         |    |    |   |   |   |   |
| FN0611  | -0.494                 | 17.949               | 1.756e-3 | 5.151e-3 | 471    | 541 | 471.0000   | 612.3357 | AAL94807.1  Threonyl-tRNA synthetase                                         |                         |    |    |   |   |   |   |
|         |                        |                      |          |          | 294    | 476 | 376.6844   | 581.8317 |                                                                              |                         |    |    |   |   |   |   |
| FN0612  | -0.449                 | 13.835               | 3.803e-2 | 1.897e-1 | 66     | 107 | 66.0000    | 121.1089 | AAL94808.1  Hypothetical protein                                             |                         |    |    |   |   |   |   |
|         |                        |                      |          |          | 110    | 132 | 140.9363   | 161.3483 |                                                                              |                         |    |    |   |   |   |   |
| FN0616  | -0.494                 | 11.072               | 1.783e-2 | 7.93e-2  | 50     | 53  | 50.0000    | 59.9885  | AAL94812.1  Hypothetical protein                                             |                         |    |    |   |   |   |   |
|         |                        |                      |          |          | 22     | 41  | 28.1873    | 50.1158  |                                                                              |                         |    |    |   |   |   |   |
| FN0617  | -0.472                 | 15.195               | 9.75e-5  | 1.048e-4 | 170    | 200 | 170.0000   | 226.3718 | AAL94813.1  DNA polymerase III, beta chain                                   |                         |    |    |   |   |   |   |
|         |                        |                      |          |          | 124    | 188 | 158.8737   | 229.7991 |                                                                              |                         |    |    |   |   |   |   |
| FN0618  | -1.074                 | 13.277               | 4.123e-5 | 3.105e-5 | 72     | 128 | 72.0000    | 144.8779 | AAL94814.1  Spermidine/putrescine-binding protein                            |                         |    |    |   |   |   |   |
|         |                        |                      |          |          | 51     | 118 | 65.3432    | 144.2356 |                                                                              |                         |    |    |   |   |   |   |
| FN0619  | -0.843                 | 8.477                |          |          |        | 22  |            | 24.9009  | AAL94815.1  Small-conductance mechanosensitive channel                       |                         |    |    |   |   |   |   |
|         |                        |                      |          |          | 11     | 21  | 14.0936    | 25.6690  |                                                                              |                         |    |    |   |   |   |   |
| FN0621  | 0.032                  | 11.512               | 1.478e-1 | 8.778e-1 | 67     | 48  | 67.0000    | 54.3292  | AAL94817.1  4-hydroxybutyrate coenzyme A transferase                         |                         |    |    |   |   |   |   |
|         |                        |                      |          |          | 33     | 43  | 42.2809    | 52.5604  |                                                                              |                         |    |    |   |   |   |   |
| FN0622  | -0.586                 | 4.529                | 1.697e-4 | 2.285e-4 | 4      | 5   | 4.0000     | 5.6593   | AAL94818.1  8-oxoguanine DNA glycosylase                                     |                         |    |    |   |   |   |   |
|         |                        |                      |          |          | 3      | 5   | 3.8437     | 6.1117   |                                                                              |                         |    |    |   |   |   |   |
| FN0625  | 0.628                  | 10.033               | 2.237e-2 | 1.024e-1 | 51     | 19  | 51.0000    | 21.5053  | AAL94821.1  Aspartate aminotransferase                                       |                         |    |    |   |   |   |   |
|         |                        |                      |          |          | 23     | 25  | 29.4685    | 30.5584  |                                                                              |                         |    |    |   |   |   |   |
| FN0627  | 0.549                  | 15.693               | 1.368e-4 | 1.7e-4   | 284    | 158 | 284.0000   | 178.8337 | AAL94823.1  Glucosamine--fructose-6-phosphate aminotransferase (isomerizing) |                         |    |    |   |   |   |   |
|         |                        |                      |          |          | 213    | 165 | 272.9040   | 201.6854 |                                                                              |                         |    |    |   |   |   |   |
| FN0628  | 1.666                  | 6.825                | 6.355e-4 | 1.355e-3 | 20     | 3   | 20.0000    | 3.3956   | AAL94824.1  Glucosamine--fructose-6-phosphate aminotransferase (isomerizing) |                         |    |    |   |   |   |   |
|         |                        |                      |          |          | 14     | 7   | 17.9374    | 8.5563   |                                                                              |                         |    |    |   |   |   |   |
| FN0629  | 1.101                  | 9.400                | 3.787e-4 | 6.97e-4  | 39     | 13  | 39.0000    | 14.7142  | AAL94825.1  PTS system, IID component                                        |                         |    |    |   |   |   |   |
|         |                        |                      |          |          | 29     | 17  | 37.1559    | 20.7797  |                                                                              |                         |    |    |   |   |   |   |
| FN0630  | 0.839                  | 8.337                |          |          | 34     |     | 34.0000    |          | AAL94826.1  PTS system, IIC component                                        |                         |    |    |   |   |   |   |
|         |                        |                      |          |          | 11     | 11  | 14.0936    | 13.4457  |                                                                              |                         |    |    |   |   |   |   |
| FN0631  | -0.712                 | 7.927                | 6.122e-3 | 2.322e-2 | 9      | 18  | 9.0000     | 20.3735  | AAL94827.1  PTS system, IIB component                                        |                         |    |    |   |   |   |   |
|         |                        |                      |          |          | 12     | 16  | 15.3749    | 19.5574  |                                                                              |                         |    |    |   |   |   |   |
| FN0633  | -0.507                 | 5.963                | 5.275e-2 | 2.747e-1 | 3      | 8   | 3.0000     | 9.0549   | AAL94829.1  Replication protein                                              |                         |    |    |   |   |   |   |
|         |                        |                      |          |          | 8      | 8   | 10.2499    | 9.7787   |                                                                              |                         |    |    |   |   |   |   |

Show detected proteins only  
 Show all proteins  
 Filter by category:

Proteins found: 1297

Enter (or paste) list of ORFs

Find ORFs

Test Cutoff

q-Value p-Value

.005

| Signif | Direction | Applies To   |
|--------|-----------|--------------|
| yes    | +         | ratios, bars |
| no     | n/a       | bars         |
| yes    | -         | ratios, bars |
| yes    | +         | p-, q-Values |
| yes    | -         | p-, q-Values |

Dot Plots Dot Plots



Fn Summary Table FnPg vs Fn FnSg vs Fn FnPgSg vs Fn FnPgSg vs FnPg FnSg vs FnPg FnPgSg vs FnSg Fn Coverage

| Protein | FnPgSg vs Fn           |                      |          |          | Raw    |      | Normalized |           | Description                                                    | Log <sub>2</sub> Ratios |    |    |   |   |   |   |
|---------|------------------------|----------------------|----------|----------|--------|------|------------|-----------|----------------------------------------------------------------|-------------------------|----|----|---|---|---|---|
|         | Log <sub>2</sub> Ratio | Log <sub>2</sub> Sum | q-Value  | p-Value  | FnPgSg | Fn   | FnPgSg     | Fn        |                                                                | -6                      | -4 | -2 | 0 | 2 | 4 | 6 |
| FN0634  | -0.464                 | 13.823               | 1.253e-3 | 3.257e-3 | 105    | 117  | 105.0000   | 132.4275  | AAL94830.1  GTP-binding protein TypA/BipA                      |                         |    |    |   |   |   |   |
|         |                        |                      |          |          | 78     | 123  | 99.9367    | 150.3473  |                                                                |                         |    |    |   |   |   |   |
| FN0636  |                        |                      |          |          |        | 6    |            | 6.7912    | AAL94832.1  Hypothetical protein                               |                         |    |    |   |   |   |   |
|         |                        |                      |          |          |        |      |            |           |                                                                |                         |    |    |   |   |   |   |
| FN0637  | -0.561                 | 5.319                | 7.934e-3 | 3.142e-2 | 4      | 6    | 4.0000     | 6.7912    | AAL94833.1  Hypothetical exported 24-amino acid repeat protein |                         |    |    |   |   |   |   |
|         |                        |                      |          |          | 5      | 7    | 6.4062     | 8.5563    |                                                                |                         |    |    |   |   |   |   |
| FN0643  | -0.252                 | 7.818                | 3.311e-2 | 1.615e-1 | 16     | 16   | 16.0000    | 18.1097   | AAL94839.1  hypothetical DNA-binding protein                   |                         |    |    |   |   |   |   |
|         |                        |                      |          |          | 9      | 12   | 11.5312    | 14.6680   |                                                                |                         |    |    |   |   |   |   |
| FN0644  | -0.400                 | 10.754               | 3.796e-2 | 1.893e-1 | 48     | 39   | 48.0000    | 44.1425   | AAL94840.1  Uroporphyrin-III C-methyltransferase               |                         |    |    |   |   |   |   |
|         |                        |                      |          |          | 19     | 42   | 24.3435    | 51.3381   |                                                                |                         |    |    |   |   |   |   |
| FN0645  | -0.577                 | 5.907                | 9.526e-3 | 3.902e-2 | 5      | 7    | 5.0000     | 7.9230    | AAL94841.1  Porphobilinogen deaminase                          |                         |    |    |   |   |   |   |
|         |                        |                      |          |          | 6      | 9    | 7.6874     | 11.0010   |                                                                |                         |    |    |   |   |   |   |
| FN0646  |                        |                      |          |          | 11     |      | 11.0000    |           | AAL94842.1  Glutamyl-tRNA reductase                            |                         |    |    |   |   |   |   |
|         |                        |                      |          |          |        |      |            |           |                                                                |                         |    |    |   |   |   |   |
| FN0647  |                        |                      |          |          | 5      |      | 5.0000     |           | AAL94843.1  transcriptional regulator                          |                         |    |    |   |   |   |   |
|         |                        |                      |          |          |        |      |            |           |                                                                |                         |    |    |   |   |   |   |
| FN0652  | -0.162                 | 22.228               | 2.716e-2 | 1.279e-1 | 2302   | 2050 | 2302.0000  | 2320.3108 | AAL94848.1  Glyceraldehyde 3-phosphate dehydrogenase           |                         |    |    |   |   |   |   |
|         |                        |                      |          |          | 1474   | 1937 | 1888.5469  | 2367.6639 |                                                                |                         |    |    |   |   |   |   |
| FN0653  | -1.204                 | 10.051               | 6.921e-4 | 1.509e-3 | 16     | 42   | 16.0000    | 47.5381   | AAL94849.1  unknown                                            |                         |    |    |   |   |   |   |
|         |                        |                      |          |          | 21     | 42   | 26.9060    | 51.3381   |                                                                |                         |    |    |   |   |   |   |
| FN0654  | -0.605                 | 18.012               | 6.725e-4 | 1.457e-3 | 366    | 532  | 366.0000   | 602.1490  | AAL94850.1  Phosphoglycerate kinase                            |                         |    |    |   |   |   |   |
|         |                        |                      |          |          | 365    | 545  | 467.6524   | 666.1729  |                                                                |                         |    |    |   |   |   |   |
| FN0655  | -0.599                 | 11.889               | 1.606e-2 | 7.04e-2  | 36     | 54   | 36.0000    | 61.1204   | AAL94851.1  unknown                                            |                         |    |    |   |   |   |   |
|         |                        |                      |          |          | 50     | 74   | 64.0620    | 90.4528   |                                                                |                         |    |    |   |   |   |   |
| FN0656  | -1.318                 | 11.420               | 1.331e-3 | 3.554e-3 | 33     | 64   | 33.0000    | 72.4390   | AAL94852.1  Hypothetical protein                               |                         |    |    |   |   |   |   |
|         |                        |                      |          |          | 26     | 76   | 33.3122    | 92.8975   |                                                                |                         |    |    |   |   |   |   |
| FN0657  |                        |                      |          |          |        | 9    |            | 10.1867   | AAL94853.1  Acetyltransferase                                  |                         |    |    |   |   |   |   |
|         |                        |                      |          |          |        |      |            |           |                                                                |                         |    |    |   |   |   |   |
| FN0658  | 0.052                  | 14.536               | 4.079e-2 | 2.059e-1 | 155    | 139  | 155.0000   | 157.3284  | AAL94854.1  ABC transporter substrate-binding protein          |                         |    |    |   |   |   |   |
|         |                        |                      |          |          | 124    | 119  | 158.8737   | 145.4579  |                                                                |                         |    |    |   |   |   |   |
| FN0660  | -0.653                 | 6.461                | 3.459e-3 | 1.168e-2 | 6      | 10   | 6.0000     | 11.3186   | AAL94856.1  ABC transporter ATP-binding protein                |                         |    |    |   |   |   |   |
|         |                        |                      |          |          | 7      | 10   | 8.9687     | 12.2234   |                                                                |                         |    |    |   |   |   |   |

Show detected proteins only

Show all proteins

Filter by category:

GO: amino acid transport

Proteins found:

1297

Enter (or paste) list of ORFs

Find ORFs

**Test**      **Cutoff**

q-Value      .005

p-Value

| Signif | Direction | Applies To   |
|--------|-----------|--------------|
| yes    | +         | ratios, bars |
| no     | n/a       | bars         |
| yes    | -         | ratios, bars |
| yes    | +         | p-, q-Values |
| yes    | -         | p-, q-Values |

Dot Plots    Dot Plots

| Protein | FnPgSg vs Fn           |                      |          |           | Raw    |     | Normalized |           | Description                                                         | Log <sub>2</sub> Ratios |    |    |   |   |   |   |
|---------|------------------------|----------------------|----------|-----------|--------|-----|------------|-----------|---------------------------------------------------------------------|-------------------------|----|----|---|---|---|---|
|         | Log <sub>2</sub> Ratio | Log <sub>2</sub> Sum | q-Value  | p-Value   | FnPgSg | Fn  | FnPgSg     | Fn        |                                                                     | -6                      | -4 | -2 | 0 | 2 | 4 | 6 |
| FN0662  | 0.263                  | 10.716               | 1.425e-2 | 6.149e-2  | 45     | 37  | 45.0000    | 41.8788   | AAL94858.1  Formiminoglutamase                                      |                         |    |    |   |   |   |   |
|         |                        |                      |          |           | 35     | 27  | 44.8434    | 33.0031   |                                                                     |                         |    |    |   |   |   |   |
| FN0664  | -0.587                 | 14.000               | 2.851e-3 | 9.277e-3  | 123    | 126 | 123.0000   | 142.6142  | AAL94860.1  2-nitropropane dioxygenase                              |                         |    |    |   |   |   |   |
|         |                        |                      |          |           | 67     | 140 | 85.8430    | 171.1270  |                                                                     |                         |    |    |   |   |   |   |
| FN0666  |                        |                      |          |           |        | 9   |            | 10.1867   | AAL94862.1  Hypothetical protein                                    |                         |    |    |   |   |   |   |
|         |                        |                      |          |           |        | 10  |            | 12.2234   |                                                                     |                         |    |    |   |   |   |   |
| FN0668  | -1.596                 | 8.436                | 1.109e-3 | 2.747e-3  | 15     | 28  | 15.0000    | 31.6921   | AAL94864.1  High-affinity zinc uptake system protein znuA precursor |                         |    |    |   |   |   |   |
|         |                        |                      |          |           | 5      | 27  | 6.4062     | 33.0031   |                                                                     |                         |    |    |   |   |   |   |
| FN0672  |                        |                      |          |           |        |     |            |           | AAL94868.1  ATPase                                                  |                         |    |    |   |   |   |   |
|         |                        |                      |          |           | 9      |     | 11.5312    |           |                                                                     |                         |    |    |   |   |   |   |
| FN0675  | -0.047                 | 20.137               | 9.545e-2 | 5.335e-1  | 974    | 936 | 974.0000   | 1059.4200 | AAL94871.1  60 kDa chaperonin GROEL                                 |                         |    |    |   |   |   |   |
|         |                        |                      |          |           | 889    | 919 | 1139.0219  | 1123.3263 |                                                                     |                         |    |    |   |   |   |   |
| FN0676  | -1.245                 | 14.012               | 5.316e-4 | 1.079e-3  | 76     | 193 | 76.0000    | 218.4488  | AAL94872.1  10 kDa chaperonin GROES                                 |                         |    |    |   |   |   |   |
|         |                        |                      |          |           | 71     | 145 | 90.9680    | 177.2386  |                                                                     |                         |    |    |   |   |   |   |
| FN0677  | -1.849                 | 10.827               | 1.647e-5 | 6.684e-6  | 18     | 76  | 18.0000    | 86.0213   | AAL94873.1  Hypothetical protein                                    |                         |    |    |   |   |   |   |
|         |                        |                      |          |           | 21     | 62  | 26.9060    | 75.7848   |                                                                     |                         |    |    |   |   |   |   |
| FN0678  | -0.784                 | 11.988               | 9.635e-5 | 1.029e-4  | 51     | 70  | 51.0000    | 79.2301   | AAL94874.1  Ser/Thr protein kinase                                  |                         |    |    |   |   |   |   |
|         |                        |                      |          |           | 36     | 72  | 46.1246    | 88.0082   |                                                                     |                         |    |    |   |   |   |   |
| FN0679  | -2.037                 | 5.922                |          |           |        | 16  |            | 18.1097   | AAL94875.1  GTPase                                                  |                         |    |    |   |   |   |   |
|         |                        |                      |          |           | 3      | 11  | 3.8437     | 13.4457   |                                                                     |                         |    |    |   |   |   |   |
| FN0680  |                        |                      |          |           | 6      |     | 6.0000     |           | AAL94876.1  Ribulose-phosphate 3-epimerase                          |                         |    |    |   |   |   |   |
|         |                        |                      |          |           | 4      |     | 5.1250     |           |                                                                     |                         |    |    |   |   |   |   |
| FN0681  | -0.629                 | 15.534               | 5.92e-4  | 1.237e-3  | 176    | 227 | 176.0000   | 256.9320  | AAL94877.1  Transcriptional regulator, MarR family                  |                         |    |    |   |   |   |   |
|         |                        |                      |          |           | 136    | 233 | 174.2486   | 284.8042  |                                                                     |                         |    |    |   |   |   |   |
| FN0682  | -0.398                 | 8.618                | 4.682e-2 | 2.403e-1  | 23     | 24  | 23.0000    | 27.1646   | AAL94878.1  Fibronectin-binding protein-like protein A              |                         |    |    |   |   |   |   |
|         |                        |                      |          |           | 9      | 15  | 11.5312    | 18.3350   |                                                                     |                         |    |    |   |   |   |   |
| FN0684  |                        |                      |          |           | 3      |     | 3.0000     |           | AAL94880.1  Prismane protein                                        |                         |    |    |   |   |   |   |
|         |                        |                      |          |           |        |     |            |           |                                                                     |                         |    |    |   |   |   |   |
| FN0685  | -1.816                 | 8.059                | 3.693e-5 | 2.531e-5  | 11     | 25  | 11.0000    | 28.2965   | AAL94881.1  Sodium/pantothenate symporter                           |                         |    |    |   |   |   |   |
|         |                        |                      |          |           | 5      | 27  | 6.4062     | 33.0031   |                                                                     |                         |    |    |   |   |   |   |
| FN0688  | -2.434                 | 8.604                | 1.698e-8 | 3.432e-10 | 8      | 40  | 8.0000     | 45.2744   | AAL94884.1  Hypothetical protein                                    |                         |    |    |   |   |   |   |
|         |                        |                      |          |           | 7      | 38  | 8.9687     | 46.4487   |                                                                     |                         |    |    |   |   |   |   |

Show detected proteins only  
 Show all proteins  
 Filter by category:

Proteins found: 1297

Enter (or paste) list of ORFs

Find ORFs

Test Cutoff

q-Value p-Value

.005

| Signif | Direction | Applies To   |
|--------|-----------|--------------|
| yes    | +         | ratios, bars |
| no     | n/a       | bars         |
| yes    | -         | ratios, bars |
| yes    | +         | p-, q-Values |
| yes    | -         | p-, q-Values |

Dot Plots Dot Plots

Fn Summary Table FnPg vs Fn FnSg vs Fn FnPgSg vs Fn FnPgSg vs FnPg FnSg vs FnPg FnPgSg vs FnSg Fn Coverage

| Protein | FnPgSg vs Fn           |                      |          |          | Raw    |     | Normalized |          | Description                                      | Log <sub>2</sub> Ratios |    |    |   |   |   |   |
|---------|------------------------|----------------------|----------|----------|--------|-----|------------|----------|--------------------------------------------------|-------------------------|----|----|---|---|---|---|
|         | Log <sub>2</sub> Ratio | Log <sub>2</sub> Sum | q-Value  | p-Value  | FnPgSg | Fn  | FnPgSg     | Fn       |                                                  | -6                      | -4 | -2 | 0 | 2 | 4 | 6 |
| FN0689  | -1.277                 | 14.954               | 3.587e-5 | 2.382e-5 | 120    | 234 | 120.0000   | 264.8550 | AAL94885.1  Hypothetical protein                 |                         |    |    |   |   |   |   |
|         |                        |                      |          |          | 85     | 237 | 108.9054   | 289.6935 |                                                  | ■                       |    |    |   |   |   |   |
| FN0692  | -2.211                 | 6.096                |          |          |        | 12  |            | 13.5823  | AAL94888.1  Nitrogen regulation protein NIFR3    |                         |    |    |   |   |   |   |
|         |                        |                      |          |          | 3      | 18  | 3.8437     | 22.0020  |                                                  | ■                       |    |    |   |   |   |   |
| FN0693  | -1.515                 | 8.434                |          |          | 11     | 21  | 11.0000    | 23.7690  | AAL94889.1  DNA mismatch repair protein mutS     |                         |    |    |   |   |   |   |
|         |                        |                      |          |          |        | 32  |            | 39.1147  |                                                  | ■                       |    |    |   |   |   |   |
| FN0694  | -0.881                 | 11.895               | 4.819e-4 | 9.525e-4 | 41     | 67  | 41.0000    | 75.8345  | AAL94890.1  S-layer protein                      |                         |    |    |   |   |   |   |
|         |                        |                      |          |          | 39     | 75  | 49.9683    | 91.6752  |                                                  | ■                       |    |    |   |   |   |   |
| FN0695  | -0.332                 | 9.455                | 4.54e-2  | 2.321e-1 | 28     | 32  | 28.0000    | 36.2195  | AAL94891.1  ABC transporter ATP-binding protein  |                         |    |    |   |   |   |   |
|         |                        |                      |          |          | 15     | 19  | 19.2186    | 23.2244  |                                                  | ■                       |    |    |   |   |   |   |
| FN0697  | -0.279                 | 15.429               | 1.298e-3 | 3.428e-3 | 202    | 210 | 202.0000   | 237.6904 | AAL94893.1  Alanyl-tRNA synthetase               |                         |    |    |   |   |   |   |
|         |                        |                      |          |          | 140    | 184 | 179.3735   | 224.9097 |                                                  | ■                       |    |    |   |   |   |   |
| FN0699  | -0.586                 | 13.346               | 2.026e-3 | 6.156e-3 | 82     | 101 | 82.0000    | 114.3178 | AAL94895.1  Protein translocase subunit secD     |                         |    |    |   |   |   |   |
|         |                        |                      |          |          | 66     | 111 | 84.5618    | 135.6792 |                                                  | ■                       |    |    |   |   |   |   |
| FN0700  | -1.124                 | 10.813               | 1.864e-3 | 5.557e-3 | 28     | 48  | 28.0000    | 54.3292  | AAL94896.1  Protein translocase subunit secF     |                         |    |    |   |   |   |   |
|         |                        |                      |          |          | 23     | 58  | 29.4685    | 70.8955  |                                                  | ■                       |    |    |   |   |   |   |
| FN0701  | -0.241                 | 15.049               | 4.958e-4 | 9.89e-4  | 176    | 182 | 176.0000   | 205.9983 | AAL94897.1  Methyltransferase                    |                         |    |    |   |   |   |   |
|         |                        |                      |          |          | 127    | 159 | 162.7174   | 194.3513 |                                                  | ■                       |    |    |   |   |   |   |
| FN0705  | -0.928                 | 13.173               | 3.658e-5 | 2.481e-5 | 65     | 123 | 65.0000    | 139.2187 | AAL94901.1  DNA polymerase I                     |                         |    |    |   |   |   |   |
|         |                        |                      |          |          | 58     | 103 | 74.3119    | 125.9006 |                                                  | ■                       |    |    |   |   |   |   |
| FN0706  | -0.664                 | 5.834                |          |          | 6      | 6   | 6.0000     | 6.7912   | AAL94902.1  Hypothetical cytosolic protein       |                         |    |    |   |   |   |   |
|         |                        |                      |          |          |        | 10  |            | 12.2234  |                                                  | ■                       |    |    |   |   |   |   |
| FN0707  | -1.492                 | 7.564                | 1.176e-3 | 2.978e-3 | 10     | 17  | 10.0000    | 19.2416  | AAL94903.1  Riboflavin kinase                    |                         |    |    |   |   |   |   |
|         |                        |                      |          |          | 5      | 22  | 6.4062     | 26.8914  |                                                  | ■                       |    |    |   |   |   |   |
| FN0710  | -0.639                 | 11.457               | 1.889e-3 | 5.652e-3 | 44     | 64  | 44.0000    | 72.4390  | AAL94906.1  Hypothetical protein                 |                         |    |    |   |   |   |   |
|         |                        |                      |          |          | 32     | 49  | 40.9997    | 59.8944  |                                                  | ■                       |    |    |   |   |   |   |
| FN0711  | -0.279                 | 6.543                | 6.685e-2 | 3.574e-1 | 6      | 8   | 6.0000     | 9.0549   | AAL94907.1  Phosphopantothenate--cysteine ligase |                         |    |    |   |   |   |   |
|         |                        |                      |          |          | 9      | 10  | 11.5312    | 12.2234  |                                                  | ■                       |    |    |   |   |   |   |
| FN0715  | 0.854                  | 14.829               | 4.094e-3 | 1.433e-2 | 264    | 113 | 264.0000   | 127.9001 | AAL94911.1  Hypothetical protein                 |                         |    |    |   |   |   |   |
|         |                        |                      |          |          | 152    | 103 | 194.7484   | 125.9006 |                                                  | ■                       |    |    |   |   |   |   |
| FN0716  | -1.301                 | 10.767               | 1.141e-3 | 2.855e-3 | 25     | 65  | 25.0000    | 73.5708  | AAL94912.1  hypothetical protein                 |                         |    |    |   |   |   |   |
|         |                        |                      |          |          | 22     | 47  | 28.1873    | 57.4498  |                                                  | ■                       |    |    |   |   |   |   |

Show detected proteins only  
 Show all proteins  
 Filter by category:

Proteins found: 1297

Test Cutoff

| Signif | Direction | Applies To   |
|--------|-----------|--------------|
| ■      | yes +     | ratios, bars |
| ■      | no n/a    | bars         |
| ■      | yes -     | ratios, bars |
| ■      | yes +     | p-, q-Values |
| ■      | yes -     |              |

| Protein | FnPgSg vs Fn           |                      |          |          | Raw    |     | Normalized |          | Description                                                    | Log <sub>2</sub> Ratios |    |    |   |   |   |   |
|---------|------------------------|----------------------|----------|----------|--------|-----|------------|----------|----------------------------------------------------------------|-------------------------|----|----|---|---|---|---|
|         | Log <sub>2</sub> Ratio | Log <sub>2</sub> Sum | q-Value  | p-Value  | FnPgSg | Fn  | FnPgSg     | Fn       |                                                                | -6                      | -4 | -2 | 0 | 2 | 4 | 6 |
| FN0717  | -0.553                 | 5.197                |          |          | 5      |     | 5.0000     |          | AAL94913.1  Ribosomal small subunit pseudouridine synthase A   |                         |    |    |   |   |   |   |
|         |                        |                      |          |          |        | 6   |            | 7.3340   |                                                                |                         |    |    |   |   |   |   |
| FN0719  |                        |                      |          |          |        |     |            |          | AAL94915.1  Hypothetical cytosolic protein                     |                         |    |    |   |   |   |   |
|         |                        |                      |          |          |        | 9   |            | 10.1867  |                                                                |                         |    |    |   |   |   |   |
| FN0720  | -1.880                 | 12.850               | 7.657e-5 | 7.375e-5 | 46     | 139 | 46.0000    | 157.3284 | AAL94916.1  Protein Translation Elongation Factor P (EF-P)     |                         |    |    |   |   |   |   |
|         |                        |                      |          |          |        | 34  | 141        | 43.5621  | 172.3493                                                       |                         |    |    |   |   |   |   |
| FN0721  | -1.131                 | 11.511               | 2.317e-4 | 3.61e-4  | 32     | 70  | 32.0000    | 79.2301  | AAL94917.1  Hypothetical protein                               |                         |    |    |   |   |   |   |
|         |                        |                      |          |          |        | 32  | 66         | 40.9997  | 80.6741                                                        |                         |    |    |   |   |   |   |
| FN0722  | -1.872                 | 5.872                |          |          | 4      | 14  | 4.0000     | 15.8460  | AAL94918.1  WD-repeat family protein                           |                         |    |    |   |   |   |   |
|         |                        |                      |          |          |        |     | 11         |          | 13.4457                                                        |                         |    |    |   |   |   |   |
| FN0724  | 0.344                  | 10.574               | 1.666e-2 | 7.341e-2 | 38     | 31  | 38.0000    | 35.0876  | AAL94920.1  Flavodoxin                                         |                         |    |    |   |   |   |   |
|         |                        |                      |          |          |        | 39  | 28         | 49.9683  | 34.2254                                                        |                         |    |    |   |   |   |   |
| FN0725  | 0.016                  | 6.642                | 1.604e-1 | 9.67e-1  | 6      | 10  | 6.0000     | 11.3186  | AAL94921.1  Molybdopterin biosynthesis MoeB protein            |                         |    |    |   |   |   |   |
|         |                        |                      |          |          |        | 11  | 7          | 14.0936  | 8.5563                                                         |                         |    |    |   |   |   |   |
| FN0728  | 0.298                  | 10.116               | 9.09e-4  | 2.113e-3 | 38     | 25  | 38.0000    | 28.2965  | AAL94924.1  Hypothetical protein                               |                         |    |    |   |   |   |   |
|         |                        |                      |          |          |        | 28  | 26         | 35.8747  | 31.7807                                                        |                         |    |    |   |   |   |   |
| FN0729  | -0.521                 | 14.939               | 6.743e-4 | 1.462e-3 | 146    | 197 | 146.0000   | 222.9762 | AAL94925.1  Phosphoglycerate mutase                            |                         |    |    |   |   |   |   |
|         |                        |                      |          |          |        | 117 | 165        | 149.9050 | 201.6854                                                       |                         |    |    |   |   |   |   |
| FN0731  | -0.059                 | 8.739                | 7.61e-2  | 4.131e-1 | 20     | 20  | 20.0000    | 22.6372  | AAL94927.1  Hypothetical protein                               |                         |    |    |   |   |   |   |
|         |                        |                      |          |          |        | 16  | 16         | 20.4998  | 19.5574                                                        |                         |    |    |   |   |   |   |
| FN0733  | 0.483                  | 14.007               | 3.863e-5 | 2.793e-5 | 147    | 100 | 147.0000   | 113.1859 | AAL94929.1  Peptidase T                                        |                         |    |    |   |   |   |   |
|         |                        |                      |          |          |        | 122 | 85         | 156.3112 | 103.8985                                                       |                         |    |    |   |   |   |   |
| FN0734  |                        |                      |          |          |        |     |            |          | AAL94930.1  Fe-S oxidoreductase                                |                         |    |    |   |   |   |   |
|         |                        |                      |          |          |        | 9   |            | 10.1867  |                                                                |                         |    |    |   |   |   |   |
| FN0735  | -0.054                 | 13.439               | 1.183e-1 | 6.795e-1 | 89     | 99  | 89.0000    | 112.0540 | AAL94931.1  Cell surface protein                               |                         |    |    |   |   |   |   |
|         |                        |                      |          |          |        | 92  | 84         | 117.8740 | 102.6762                                                       |                         |    |    |   |   |   |   |
| FN0736  |                        |                      |          |          | 5      |     | 5.0000     |          | AAL94932.1  Methyltransferase                                  |                         |    |    |   |   |   |   |
|         |                        |                      |          |          |        | 8   |            | 10.2499  |                                                                |                         |    |    |   |   |   |   |
| FN0737  |                        |                      |          |          | 15     |     | 15.0000    |          | AAL94933.1  Hypothetical protein                               |                         |    |    |   |   |   |   |
|         |                        |                      |          |          |        | 10  |            | 12.8124  |                                                                |                         |    |    |   |   |   |   |
| FN0738  | -1.700                 | 10.360               | 5.852e-5 | 5.076e-5 | 21     | 55  | 21.0000    | 62.2522  | AAL94934.1  Hypothetical exported 24-amino acid repeat protein |                         |    |    |   |   |   |   |
|         |                        |                      |          |          |        | 15  | 56         | 19.2186  | 68.4508                                                        |                         |    |    |   |   |   |   |

Show detected proteins only  
 Show all proteins  
 Filter by category:

Proteins found: 1297

Enter (or paste) list of ORFs

Find ORFs

Test Cutoff

q-Value

p-Value

.005

| Signif | Direction | Applies To   |
|--------|-----------|--------------|
| yes    | +         | ratios, bars |
| no     | n/a       | bars         |
| yes    | -         | ratios, bars |
| yes    | +         | p-, q-Values |
| yes    | -         | p-, q-Values |

Dot Plots Dot Plots

| Protein | FnPgSg vs Fn           |                      |          |          | Raw    |     | Normalized |          | Description                                               | Log <sub>2</sub> Ratios |    |    |   |   |   |   |
|---------|------------------------|----------------------|----------|----------|--------|-----|------------|----------|-----------------------------------------------------------|-------------------------|----|----|---|---|---|---|
|         | Log <sub>2</sub> Ratio | Log <sub>2</sub> Sum | q-Value  | p-Value  | FnPgSg | Fn  | FnPgSg     | Fn       |                                                           | -6                      | -4 | -2 | 0 | 2 | 4 | 6 |
| FN0739  | 0.591                  | 16.351               | 9.206e-5 | 9.607e-5 | 338    | 196 | 338.0000   | 221.8444 | AAL94935.1  Formiminotetrahydrofolate cyclodeaminase      |                         |    |    |   |   |   |   |
|         |                        |                      |          |          | 290    | 204 | 371.5594   | 249.3564 |                                                           |                         |    |    |   |   |   |   |
| FN0740  | -0.616                 | 17.012               | 1.28e-4  | 1.542e-4 | 308    | 401 | 308.0000   | 453.8754 | AAL94936.1  Imidazolonepropionase                         |                         |    |    |   |   |   |   |
|         |                        |                      |          |          | 218    | 365 | 279.3102   | 446.1525 |                                                           |                         |    |    |   |   |   |   |
| FN0741  | 0.288                  | 18.624               | 2.784e-3 | 9.005e-3 | 659    | 525 | 659.0000   | 594.2259 | AAL94937.1  Glutamate formiminotransferase                |                         |    |    |   |   |   |   |
|         |                        |                      |          |          | 582    | 455 | 745.6814   | 556.1627 |                                                           |                         |    |    |   |   |   |   |
| FN0742  | -0.460                 | 11.802               | 2.817e-2 | 1.334e-1 | 66     | 72  | 66.0000    | 81.4938  | AAL94938.1  unknown                                       |                         |    |    |   |   |   |   |
|         |                        |                      |          |          | 28     | 48  | 35.8747    | 58.6721  |                                                           |                         |    |    |   |   |   |   |
| FN0743  | 0.211                  | 7.022                | 5.456e-3 | 2.028e-2 | 13     | 9   | 13.0000    | 10.1867  | AAL94939.1  ATP-dependent helicase, DinG family           |                         |    |    |   |   |   |   |
|         |                        |                      |          |          | 9      | 9   | 11.5312    | 11.0010  |                                                           |                         |    |    |   |   |   |   |
| FN0745  | -0.765                 | 14.194               | 3.351e-3 | 1.126e-2 | 114    | 135 | 114.0000   | 152.8010 | AAL94941.1  metal dependent phosphohydrolase              |                         |    |    |   |   |   |   |
|         |                        |                      |          |          | 75     | 167 | 96.0930    | 204.1300 |                                                           |                         |    |    |   |   |   |   |
| FN0746  |                        |                      |          |          |        | 9   |            | 10.1867  | AAL94942.1  Hypothetical Metal-Binding Protein            |                         |    |    |   |   |   |   |
|         |                        |                      |          |          |        |     |            |          |                                                           |                         |    |    |   |   |   |   |
| FN0749  | -0.864                 | 5.579                |          |          |        | 10  |            | 11.3186  | AAL94945.1  Hypothetical protein                          |                         |    |    |   |   |   |   |
|         |                        |                      |          |          | 4      | 6   | 5.1250     | 7.3340   |                                                           |                         |    |    |   |   |   |   |
| FN0750  | -1.869                 | 8.204                | 2.312e-4 | 3.598e-4 | 9      | 31  | 9.0000     | 35.0876  | AAL94946.1  Hypothetical protein                          |                         |    |    |   |   |   |   |
|         |                        |                      |          |          | 7      | 25  | 8.9687     | 30.5584  |                                                           |                         |    |    |   |   |   |   |
| FN0751  | -0.623                 | 8.276                | 2.707e-3 | 8.698e-3 | 13     | 17  | 13.0000    | 19.2416  | AAL94947.1  L-asparaginase I                              |                         |    |    |   |   |   |   |
|         |                        |                      |          |          | 12     | 20  | 15.3749    | 24.4467  |                                                           |                         |    |    |   |   |   |   |
| FN0752  | -1.588                 | 6.788                | 1.331e-4 | 1.632e-4 | 7      | 16  | 7.0000     | 18.1097  | AAL94948.1  Proline iminopeptidase                        |                         |    |    |   |   |   |   |
|         |                        |                      |          |          | 4      | 15  | 5.1250     | 18.3350  |                                                           |                         |    |    |   |   |   |   |
| FN0753  | 1.007                  | 12.778               | 5.188e-4 | 1.047e-3 | 121    | 44  | 121.0000   | 49.8018  | AAL94949.1  Glutamyl-tRNA(Gln) amidotransferase subunit B |                         |    |    |   |   |   |   |
|         |                        |                      |          |          | 91     | 56  | 116.5928   | 68.4508  |                                                           |                         |    |    |   |   |   |   |
| FN0754  | -0.034                 | 13.692               | 1.354e-1 | 7.925e-1 | 130    | 102 | 130.0000   | 115.4496 | AAL94950.1  Glutamyl-tRNA(Gln) amidotransferase subunit A |                         |    |    |   |   |   |   |
|         |                        |                      |          |          | 76     | 96  | 97.3742    | 117.3442 |                                                           |                         |    |    |   |   |   |   |
| FN0755  | -0.741                 | 11.029               | 1.173e-3 | 2.969e-3 | 31     | 58  | 31.0000    | 65.6478  | AAL94951.1  Glutamyl-tRNA(Gln) amidotransferase subunit C |                         |    |    |   |   |   |   |
|         |                        |                      |          |          | 31     | 43  | 39.7184    | 52.5604  |                                                           |                         |    |    |   |   |   |   |
| FN0758  | -0.951                 | 14.496               | 1.389e-4 | 1.738e-4 | 111    | 179 | 111.0000   | 202.6028 | AAL94954.1  Rod shape-determining protein mreB            |                         |    |    |   |   |   |   |
|         |                        |                      |          |          | 84     | 180 | 107.6241   | 220.0204 |                                                           |                         |    |    |   |   |   |   |
| FN0761  | -0.342                 | 7.659                | 4.446e-2 | 2.267e-1 | 15     | 11  | 15.0000    | 12.4504  | AAL94957.1  Bvg accessory factor                          |                         |    |    |   |   |   |   |
|         |                        |                      |          |          | 8      | 16  | 10.2499    | 19.5574  |                                                           |                         |    |    |   |   |   |   |

Show detected proteins only  
 Show all proteins  
 Filter by category:

Proteins found: 1297

Enter (or paste) list of ORFs

Find ORFs

Test Cutoff

q-Value

p-Value

.005

| Signif | Direction | Applies To   |
|--------|-----------|--------------|
| yes    | +         | ratios, bars |
| no     | n/a       | bars         |
| yes    | -         | ratios, bars |
| yes    | +         | p-, q-Values |
| yes    | -         | p-, q-Values |

Dot Plots Dot Plots

Fn Summary Table FnPg vs Fn FnSg vs Fn FnPgSg vs Fn FnPgSg vs FnPg FnSg vs FnPg FnPgSg vs FnSg Fn Coverage

| Protein       | FnPgSg vs Fn           |                      |          |          | Raw    |      | Normalized |           | Description                                                                | Log <sub>2</sub> Ratios |    |    |   |   |   |   |
|---------------|------------------------|----------------------|----------|----------|--------|------|------------|-----------|----------------------------------------------------------------------------|-------------------------|----|----|---|---|---|---|
|               | Log <sub>2</sub> Ratio | Log <sub>2</sub> Sum | q-Value  | p-Value  | FnPgSg | Fn   | FnPgSg     | Fn        |                                                                            | -6                      | -4 | -2 | 0 | 2 | 4 | 6 |
| <b>FN0765</b> | -1.411                 | 5.411                |          |          | 4      | 8    | 4.0000     | 9.0549    | AAL94961.1  tRNA (5-methylaminomethyl -2-thiouridylate) -methyltransferase |                         |    |    |   |   |   |   |
|               |                        |                      |          |          |        | 10   |            | 12.2234   |                                                                            |                         |    |    |   |   |   |   |
| <b>FN0766</b> | 0.488                  | 8.871                |          |          |        | 15   |            | 16.9779   | AAL94962.1  Large-conductance mechanosensitive channel                     |                         |    |    |   |   |   |   |
|               |                        |                      |          |          | 20     | 16   | 25.6248    | 19.5574   |                                                                            |                         |    |    |   |   |   |   |
| <b>FN0768</b> | -1.399                 | 5.399                |          |          | 4      | 10   | 4.0000     | 11.3186   | AAL94964.1  Hemin receptor                                                 |                         |    |    |   |   |   |   |
|               |                        |                      |          |          |        | 8    |            | 9.7787    |                                                                            |                         |    |    |   |   |   |   |
| <b>FN0771</b> |                        |                      |          |          |        |      |            |           | AAL94967.1  Oxygen-independent coproporphyrinogen III oxidase              |                         |    |    |   |   |   |   |
|               |                        |                      |          |          |        | 14   |            | 17.1127   |                                                                            |                         |    |    |   |   |   |   |
| <b>FN0772</b> |                        |                      |          |          |        | 7    |            | 7.9230    | AAL94968.1  Flavodoxin                                                     |                         |    |    |   |   |   |   |
|               |                        |                      |          |          |        | 3    |            | 3.6670    |                                                                            |                         |    |    |   |   |   |   |
| <b>FN0774</b> | -0.436                 | 14.423               | 9.202e-3 | 3.744e-2 | 105    | 148  | 105.0000   | 167.5151  | AAL94970.1  Hypothetical cytosolic protein                                 |                         |    |    |   |   |   |   |
|               |                        |                      |          |          | 117    | 145  | 149.9050   | 177.2386  |                                                                            |                         |    |    |   |   |   |   |
| <b>FN0775</b> | -0.699                 | 16.200               | 1.849e-6 | 3.037e-7 | 218    | 313  | 218.0000   | 354.2719  | AAL94971.1  Aspartyl aminopeptidase                                        |                         |    |    |   |   |   |   |
|               |                        |                      |          |          | 166    | 282  | 212.6857   | 344.6986  |                                                                            |                         |    |    |   |   |   |   |
| <b>FN0776</b> | -0.808                 | 12.351               | 1.605e-3 | 4.605e-3 | 58     | 75   | 58.0000    | 84.8894   | AAL94972.1  Aspartate-ammonia ligase                                       |                         |    |    |   |   |   |   |
|               |                        |                      |          |          | 40     | 87   | 51.2496    | 106.3432  |                                                                            |                         |    |    |   |   |   |   |
| <b>FN0777</b> | 0.357                  | 12.533               | 1.327e-2 | 5.67e-2  | 91     | 50   | 91.0000    | 56.5929   | AAL94973.1  GTP-binding protein lepA                                       |                         |    |    |   |   |   |   |
|               |                        |                      |          |          | 65     | 65   | 83.2806    | 79.4518   |                                                                            |                         |    |    |   |   |   |   |
| <b>FN0778</b> | -1.087                 | 8.721                |          |          |        | 27   |            | 30.5602   | AAL94974.1  Methyltransferase                                              |                         |    |    |   |   |   |   |
|               |                        |                      |          |          | 11     | 24   | 14.0936    | 29.3361   |                                                                            |                         |    |    |   |   |   |   |
| <b>FN0783</b> | 0.931                  | 23.698               | 4.028e-3 | 1.405e-2 | 5918   | 2445 | 5918.0000  | 2767.3951 | AAL94979.1  acyl-CoA dehydrogenase                                         |                         |    |    |   |   |   |   |
|               |                        |                      |          |          | 3331   | 2107 | 4267.8086  | 2575.4609 |                                                                            |                         |    |    |   |   |   |   |
| <b>FN0784</b> | -0.082                 | 22.427               | 9.113e-2 | 5.064e-1 | 1997   | 2170 | 1997.0000  | 2456.1339 | AAL94980.1  Electron transfer flavoprotein beta-subunit                    |                         |    |    |   |   |   |   |
|               |                        |                      |          |          | 2044   | 1988 | 2618.8534  | 2430.0030 |                                                                            |                         |    |    |   |   |   |   |
| <b>FN0785</b> | -0.348                 | 21.263               | 1.182e-3 | 2.999e-3 | 1458   | 1670 | 1458.0000  | 1890.2044 | AAL94981.1  Electron transfer flavoprotein alpha-subunit                   |                         |    |    |   |   |   |   |
|               |                        |                      |          |          | 1057   | 1381 | 1354.2701  | 1688.0453 |                                                                            |                         |    |    |   |   |   |   |
| <b>FN0788</b> | 0.016                  | 8.675                | 1.563e-1 | 9.377e-1 | 24     | 15   | 24.0000    | 16.9779   | AAL94984.1  unknown                                                        |                         |    |    |   |   |   |   |
|               |                        |                      |          |          | 13     | 19   | 16.6561    | 23.2244   |                                                                            |                         |    |    |   |   |   |   |
| <b>FN0790</b> | -1.717                 | 6.361                |          |          | 5      | 15   | 5.0000     | 16.9779   | AAL94986.1  Xylose repressor                                               |                         |    |    |   |   |   |   |
|               |                        |                      |          |          |        | 13   |            | 15.8904   |                                                                            |                         |    |    |   |   |   |   |
| <b>FN0791</b> | -0.404                 | 18.068               | 1.095e-3 | 2.699e-3 | 459    | 558  | 459.0000   | 631.5773  | AAL94987.1  Histidine ammonia-lyase                                        |                         |    |    |   |   |   |   |
|               |                        |                      |          |          | 353    | 470  | 452.2775   | 574.4977  |                                                                            |                         |    |    |   |   |   |   |

Show detected proteins only  
 Show all proteins  
 Filter by category:

Proteins found: 1297

Enter (or paste) list of ORFs

Find ORFs

Test Cutoff

q-Value

p-Value

.005

| Signif | Direction | Applies To   |
|--------|-----------|--------------|
| yes    | +         | ratios, bars |
| no     | n/a       | bars         |
| yes    | -         | ratios, bars |
| yes    | +         | p-, q-Values |
| yes    | -         | p-, q-Values |

Dot Plots Dot Plots

Fn Summary Table FnPg vs Fn FnSg vs Fn FnPgSg vs Fn FnPgSg vs FnPg FnSg vs FnPg FnPgSg vs FnSg Fn Coverage

| Protein | FnPgSg vs Fn           |                      |          |          | Raw    |      | Normalized |           | Description                                               | Log <sub>2</sub> Ratios |    |    |   |   |   |   |
|---------|------------------------|----------------------|----------|----------|--------|------|------------|-----------|-----------------------------------------------------------|-------------------------|----|----|---|---|---|---|
|         | Log <sub>2</sub> Ratio | Log <sub>2</sub> Sum | q-Value  | p-Value  | FnPgSg | Fn   | FnPgSg     | Fn        |                                                           | -6                      | -4 | -2 | 0 | 2 | 4 | 6 |
| FN0792  | -0.341                 | 19.854               | 2.672e-4 | 4.339e-4 | 823    | 1002 | 823.0000   | 1134.1227 | AAL94988.1  Urocanate hydratase                           |                         |    |    |   |   |   |   |
|         |                        |                      |          |          | 708    | 865  | 907.1175   | 1057.3202 |                                                           |                         |    |    |   |   |   |   |
| FN0793  | 0.585                  | 9.049                |          |          |        | 17   |            | 19.2416   | AAL94989.1  Sodium/glutamate symport carrier protein      |                         |    |    |   |   |   |   |
|         |                        |                      |          |          | 22     | 15   | 28.1873    | 18.3350   |                                                           |                         |    |    |   |   |   |   |
| FN0794  | -0.428                 | 6.043                |          |          | 7      | 8    | 7.0000     | 9.0549    | AAL94990.1  Hypothetical protein                          |                         |    |    |   |   |   |   |
|         |                        |                      |          |          |        | 8    |            | 9.7787    |                                                           |                         |    |    |   |   |   |   |
| FN0796  | -0.552                 | 14.481               | 1.323e-4 | 1.618e-4 | 128    | 168  | 128.0000   | 190.1523  | AAL94992.1  Pyruvate,phosphate dikinase                   |                         |    |    |   |   |   |   |
|         |                        |                      |          |          | 95     | 144  | 121.7177   | 176.0163  |                                                           |                         |    |    |   |   |   |   |
| FN0798  | 0.280                  | 7.582                | 1.017e-1 | 5.729e-1 | 10     | 6    | 10.0000    | 6.7912    | AAL94994.1  Fructose-1,6-bisphosphatase                   |                         |    |    |   |   |   |   |
|         |                        |                      |          |          | 16     | 15   | 20.4998    | 18.3350   |                                                           |                         |    |    |   |   |   |   |
| FN0799  | -0.172                 | 7.573                |          |          | 13     | 14   | 13.0000    | 15.8460   | AAL94995.1  Isoamylase                                    |                         |    |    |   |   |   |   |
|         |                        |                      |          |          |        | 11   |            | 13.4457   |                                                           |                         |    |    |   |   |   |   |
| FN0800  | 1.398                  | 11.810               | 1.159e-3 | 2.917e-3 | 110    | 35   | 110.0000   | 39.6151   | AAL94996.1  Amino acid-binding protein                    |                         |    |    |   |   |   |   |
|         |                        |                      |          |          | 66     | 28   | 84.5618    | 34.2254   |                                                           |                         |    |    |   |   |   |   |
| FN0801  |                        |                      |          |          |        | 9    |            | 10.1867   | AAL94997.1  Amino acid transport ATP-binding protein      |                         |    |    |   |   |   |   |
|         |                        |                      |          |          |        | 9    |            | 11.0010   |                                                           |                         |    |    |   |   |   |   |
| FN0803  | -1.139                 | 12.385               | 3.573e-3 | 1.215e-2 | 55     | 114  | 55.0000    | 129.0319  | AAL94999.1  Cytochrome C-TYPE biogenesis protein ccdA     |                         |    |    |   |   |   |   |
|         |                        |                      |          |          | 34     | 72   | 43.5621    | 88.0082   |                                                           |                         |    |    |   |   |   |   |
| FN0805  | -0.640                 | 4.583                |          |          | 4      |      | 4.0000     |           | AAL95001.1  Hypothetical protein                          |                         |    |    |   |   |   |   |
|         |                        |                      |          |          | 3      | 5    | 3.8437     | 6.1117    |                                                           |                         |    |    |   |   |   |   |
| FN0806  | -0.680                 | 13.041               | 1.185e-3 | 3.01e-3  | 81     | 92   | 81.0000    | 104.1310  | AAL95002.1  SpoIID homolog                                |                         |    |    |   |   |   |   |
|         |                        |                      |          |          | 50     | 105  | 64.0620    | 128.3452  |                                                           |                         |    |    |   |   |   |   |
| FN0807  | -0.330                 | 9.925                | 4.398e-2 | 2.24e-1  | 30     | 38   | 30.0000    | 43.0106   | AAL95003.1  3-deoxy-manno-octulosonate cytidyltransferase |                         |    |    |   |   |   |   |
|         |                        |                      |          |          | 20     | 22   | 25.6248    | 26.8914   |                                                           |                         |    |    |   |   |   |   |
| FN0808  | -0.392                 | 11.325               | 4.92e-3  | 1.79e-2  | 50     | 55   | 50.0000    | 62.2522   | AAL95004.1  Phosphoglycerate mutase                       |                         |    |    |   |   |   |   |
|         |                        |                      |          |          | 30     | 44   | 38.4372    | 53.7828   |                                                           |                         |    |    |   |   |   |   |
| FN0809  | -1.127                 | 8.045                |          |          | 11     | 23   | 11.0000    | 26.0328   | AAL95005.1  23S rRNA methyltransferase                    |                         |    |    |   |   |   |   |
|         |                        |                      |          |          |        | 18   |            | 22.0020   |                                                           |                         |    |    |   |   |   |   |
| FN0810  | -1.644                 | 9.813                | 1.044e-4 | 1.167e-4 | 16     | 44   | 16.0000    | 49.8018   | AAL95006.1  Low-specificity threonine aldolase            |                         |    |    |   |   |   |   |
|         |                        |                      |          |          | 14     | 46   | 17.9374    | 56.2274   |                                                           |                         |    |    |   |   |   |   |
| FN0813  | -0.317                 | 6.632                | 9.265e-2 | 5.159e-1 | 14     | 11   | 14.0000    | 12.4504   | AAL95009.1  Transcriptional regulator, TetR family        |                         |    |    |   |   |   |   |
|         |                        |                      |          |          | 3      | 8    | 3.8437     | 9.7787    |                                                           |                         |    |    |   |   |   |   |

Show detected proteins only  
 Show all proteins  
 Filter by category:

Proteins found: 1297

Enter (or paste) list of ORFs

Find ORFs

Test Cutoff

q-Value

p-Value

.005

| Signif | Direction | Applies To   |
|--------|-----------|--------------|
| yes    | +         | ratios, bars |
| no     | n/a       | bars         |
| yes    | -         | ratios, bars |
| yes    | +         | p-, q-Values |
| yes    | -         | p-, q-Values |

Dot Plots Dot Plots

Fn Summary Table FnPg vs Fn FnSg vs Fn FnPgSg vs Fn FnPgSg vs FnPg FnSg vs FnPg FnPgSg vs FnSg Fn Coverage

| Protein | FnPgSg vs Fn           |                      |          |          | Raw    |     | Normalized |          | Description                                         | Log <sub>2</sub> Ratios |    |    |   |   |   |   |
|---------|------------------------|----------------------|----------|----------|--------|-----|------------|----------|-----------------------------------------------------|-------------------------|----|----|---|---|---|---|
|         | Log <sub>2</sub> Ratio | Log <sub>2</sub> Sum | q-Value  | p-Value  | FnPgSg | Fn  | FnPgSg     | Fn       |                                                     | -6                      | -4 | -2 | 0 | 2 | 4 | 6 |
| FN0814  | -0.729                 | 16.413               | 3.378e-5 | 2.113e-5 | 241    | 322 | 241.0000   | 364.4586 | AAL95010.1  Propionate CoA-transferase              |                         |    |    |   |   |   |   |
|         |                        |                      |          |          | 170    | 324 | 217.8107   | 396.0367 |                                                     |                         |    |    |   |   |   |   |
| FN0815  | 0.171                  | 11.483               | 1.807e-2 | 8.055e-2 | 61     | 47  | 61.0000    | 53.1974  | AAL95011.1  Propionate permease                     |                         |    |    |   |   |   |   |
|         |                        |                      |          |          | 41     | 39  | 52.5308    | 47.6711  |                                                     |                         |    |    |   |   |   |   |
| FN0816  | -1.830                 | 14.326               | 1.691e-5 | 6.994e-6 | 70     | 228 | 70.0000    | 258.0638 | AAL95012.1  dehydrogenase with MaoC-like domain     |                         |    |    |   |   |   |   |
|         |                        |                      |          |          | 64     | 231 | 81.9993    | 282.3595 |                                                     |                         |    |    |   |   |   |   |
| FN0818  | -0.030                 | 19.677               | 1.22e-1  | 7.032e-1 | 852    | 761 | 852.0000   | 861.3447 | AAL95014.1  DNA-binding protein HU                  |                         |    |    |   |   |   |   |
|         |                        |                      |          |          | 749    | 809 | 959.6483   | 988.8694 |                                                     |                         |    |    |   |   |   |   |
| FN0819  | -0.003                 | 12.089               | 1.633e-1 | 9.878e-1 | 55     | 53  | 55.0000    | 59.9885  | AAL95015.1  Tetratricopeptide repeat family protein |                         |    |    |   |   |   |   |
|         |                        |                      |          |          | 60     | 59  | 76.8744    | 72.1178  |                                                     |                         |    |    |   |   |   |   |
| FN0820  | -0.244                 | 14.313               | 7.001e-3 | 2.717e-2 | 120    | 134 | 120.0000   | 151.6691 | AAL95016.1  Mercuric reductase                      |                         |    |    |   |   |   |   |
|         |                        |                      |          |          | 111    | 130 | 142.2176   | 158.9036 |                                                     |                         |    |    |   |   |   |   |
| FN0821  | -1.142                 | 12.084               | 2.269e-4 | 3.499e-4 | 40     | 79  | 40.0000    | 89.4169  | AAL95017.1  Hypothetical protein                    |                         |    |    |   |   |   |   |
|         |                        |                      |          |          | 38     | 87  | 48.6871    | 106.3432 |                                                     |                         |    |    |   |   |   |   |
| FN0823  | 0.170                  | 8.375                | 8.063e-2 | 4.41e-1  | 22     | 12  | 22.0000    | 13.5823  | AAL95019.1  GTP-binding protein hflX                |                         |    |    |   |   |   |   |
|         |                        |                      |          |          | 13     | 17  | 16.6561    | 20.7797  |                                                     |                         |    |    |   |   |   |   |
| FN0825  | -1.529                 | 11.525               | 7.45e-5  | 7.091e-5 | 37     | 83  | 37.0000    | 93.9443  | AAL95021.1  Hypothetical cytosolic protein          |                         |    |    |   |   |   |   |
|         |                        |                      |          |          | 21     | 74  | 26.9060    | 90.4528  |                                                     |                         |    |    |   |   |   |   |
| FN0826  | -0.526                 | 10.521               | 1.786e-3 | 5.264e-3 | 28     | 37  | 28.0000    | 41.8788  | AAL95022.1  periplasmic component of efflux system  |                         |    |    |   |   |   |   |
|         |                        |                      |          |          | 28     | 41  | 35.8747    | 50.1158  |                                                     |                         |    |    |   |   |   |   |
| FN0827  | -1.579                 | 9.833                | 4.789e-3 | 1.733e-2 | 17     | 35  | 17.0000    | 39.6151  | AAL95023.1  ABC transporter ATP-binding protein     |                         |    |    |   |   |   |   |
|         |                        |                      |          |          | 14     | 53  | 17.9374    | 64.7838  |                                                     |                         |    |    |   |   |   |   |
| FN0828  | -1.647                 | 6.817                |          |          | 6      | 17  | 6.0000     | 19.2416  | AAL95024.1  ABC transporter permease protein        |                         |    |    |   |   |   |   |
|         |                        |                      |          |          |        | 15  |            | 18.3350  |                                                     |                         |    |    |   |   |   |   |
| FN0830  | -1.340                 | 8.606                | 4.172e-3 | 1.467e-2 | 12     | 22  | 12.0000    | 24.9009  | AAL95026.1  Hypothetical protein                    |                         |    |    |   |   |   |   |
|         |                        |                      |          |          | 10     | 31  | 12.8124    | 37.8924  |                                                     |                         |    |    |   |   |   |   |
| FN0832  | 0.226                  | 12.551               | 1.779e-2 | 7.913e-2 | 92     | 65  | 92.0000    | 73.5708  | AAL95028.1  Hypothetical protein                    |                         |    |    |   |   |   |   |
|         |                        |                      |          |          | 59     | 57  | 75.5931    | 69.6731  |                                                     |                         |    |    |   |   |   |   |
| FN0833  | -2.045                 | 9.517                | 7.314e-4 | 1.613e-3 | 10     | 41  | 10.0000    | 46.4062  | AAL95029.1  Hypothetical protein                    |                         |    |    |   |   |   |   |
|         |                        |                      |          |          | 13     | 52  | 16.6561    | 63.5614  |                                                     |                         |    |    |   |   |   |   |
| FN0834  | -0.963                 | 9.550                | 1.062e-5 | 3.442e-6 | 20     | 33  | 20.0000    | 37.3513  | AAL95030.1  Hypothetical Exported Protein           |                         |    |    |   |   |   |   |
|         |                        |                      |          |          | 15     | 32  | 19.2186    | 39.1147  |                                                     |                         |    |    |   |   |   |   |

Show detected proteins only  
 Show all proteins  
 Filter by category:

Proteins found: 1297

Enter (or paste) list of ORFs

Find ORFs

Test Cutoff

q-Value p-Value

.005

| Signif      | Direction | Applies To |
|-------------|-----------|------------|
| red         | yes       | +          |
| yellow      | no        | n/a        |
| green       | yes       | -          |
| pink        | yes       | +          |
| light green | yes       | -          |

ratios, bars  
bars  
ratios, bars  
p-, q-Values

Dot Plots Dot Plots



Fn Summary Table FnPg vs Fn FnSg vs Fn FnPgSg vs Fn FnPgSg vs FnPg FnSg vs FnPg FnPgSg vs FnSg Fn Coverage

| Protein | FnPgSg vs Fn           |                      |          |          | Raw    |     | Normalized |          | Description                                         | Log <sub>2</sub> Ratios |    |    |   |   |   |   |
|---------|------------------------|----------------------|----------|----------|--------|-----|------------|----------|-----------------------------------------------------|-------------------------|----|----|---|---|---|---|
|         | Log <sub>2</sub> Ratio | Log <sub>2</sub> Sum | q-Value  | p-Value  | FnPgSg | Fn  | FnPgSg     | Fn       |                                                     | -6                      | -4 | -2 | 0 | 2 | 4 | 6 |
| FN0836  | 0.384                  | 8.006                | 7.241e-2 | 3.906e-1 | 11     | 14  | 11.0000    | 15.8460  | AAL95032.1  Hypothetical protein                    |                         |    |    |   |   |   |   |
|         |                        |                      |          |          | 20     | 10  | 25.6248    | 12.2234  |                                                     |                         |    |    |   |   |   |   |
| FN0846  | -1.032                 | 12.029               | 1.323e-3 | 3.524e-3 | 43     | 91  | 43.0000    | 102.9992 | AAL95042.1  Hypothetical Exported Protein           |                         |    |    |   |   |   |   |
|         |                        |                      |          |          | 37     | 67  | 47.4059    | 81.8965  |                                                     |                         |    |    |   |   |   |   |
| FN0847  | -1.892                 | 7.222                | 1.49e-5  | 5.662e-6 | 5      | 20  | 5.0000     | 22.6372  | AAL95043.1  TPR-repeat-containing proteins          |                         |    |    |   |   |   |   |
|         |                        |                      |          |          | 6      | 20  | 7.6874     | 24.4467  |                                                     |                         |    |    |   |   |   |   |
| FN0849  | -0.787                 | 9.278                | 3.527e-3 | 1.196e-2 | 20     | 33  | 20.0000    | 37.3513  | AAL95045.1  8-amino-7-oxononanoate synthase         |                         |    |    |   |   |   |   |
|         |                        |                      |          |          | 14     | 23  | 17.9374    | 28.1137  |                                                     |                         |    |    |   |   |   |   |
| FN0850  | -1.330                 | 7.402                | 1.025e-4 | 1.134e-4 | 10     | 17  | 10.0000    | 19.2416  | AAL95046.1  Hypothetical cytosolic protein          |                         |    |    |   |   |   |   |
|         |                        |                      |          |          | 5      | 18  | 6.4062     | 22.0020  |                                                     |                         |    |    |   |   |   |   |
| FN0853  | -0.782                 | 10.665               | 6.092e-6 | 1.522e-6 | 32     | 48  | 32.0000    | 54.3292  | AAL95049.1  Glycogen synthase                       |                         |    |    |   |   |   |   |
|         |                        |                      |          |          | 23     | 42  | 29.4685    | 51.3381  |                                                     |                         |    |    |   |   |   |   |
| FN0854  | 0.226                  | 11.489               | 3.804e-2 | 1.898e-1 | 66     | 39  | 66.0000    | 44.1425  | AAL95050.1  Glucose-1-phosphate adenylyltransferase |                         |    |    |   |   |   |   |
|         |                        |                      |          |          | 39     | 45  | 49.9683    | 55.0051  |                                                     |                         |    |    |   |   |   |   |
| FN0855  | -0.839                 | 13.027               | 4.245e-7 | 3.817e-8 | 70     | 109 | 70.0000    | 123.3726 | AAL95051.1  Glucose-1-phosphate adenylyltransferase |                         |    |    |   |   |   |   |
|         |                        |                      |          |          | 52     | 99  | 66.6245    | 121.0112 |                                                     |                         |    |    |   |   |   |   |
| FN0856  | -0.627                 | 11.514               | 7.566e-3 | 2.973e-2 | 55     | 55  | 55.0000    | 62.2522  | AAL95052.1  1,4-alpha-glucan branching enzyme       |                         |    |    |   |   |   |   |
|         |                        |                      |          |          | 25     | 59  | 32.0310    | 72.1178  |                                                     |                         |    |    |   |   |   |   |
| FN0857  | -0.346                 | 14.955               | 3.947e-3 | 1.37e-2  | 165    | 192 | 165.0000   | 217.3169 | AAL95053.1  Glycogen phosphorylase                  |                         |    |    |   |   |   |   |
|         |                        |                      |          |          | 118    | 151 | 151.1863   | 184.5727 |                                                     |                         |    |    |   |   |   |   |
| FN0858  | -2.182                 | 7.017                | 4.324e-4 | 8.285e-4 | 3      | 18  | 3.0000     | 20.3735  | AAL95054.1  4-alpha-glucanotransferase              |                         |    |    |   |   |   |   |
|         |                        |                      |          |          | 6      | 23  | 7.6874     | 28.1137  |                                                     |                         |    |    |   |   |   |   |
| FN0865  | -0.763                 | 9.598                | 1.47e-2  | 6.369e-2 | 12     | 36  | 12.0000    | 40.7469  | AAL95061.1  unknown                                 |                         |    |    |   |   |   |   |
|         |                        |                      |          |          | 24     | 26  | 30.7497    | 31.7807  |                                                     |                         |    |    |   |   |   |   |
| FN0867  | -0.731                 | 13.510               | 4.801e-5 | 3.853e-5 | 78     | 126 | 78.0000    | 142.6142 | AAL95063.1  Long-chain-fatty-acid--CoA ligase       |                         |    |    |   |   |   |   |
|         |                        |                      |          |          | 70     | 111 | 89.6868    | 135.6792 |                                                     |                         |    |    |   |   |   |   |
| FN0868  |                        |                      |          |          |        | 8   |            | 9.0549   | AAL95064.1  ATPases of the PP superfamily           |                         |    |    |   |   |   |   |
|         |                        |                      |          |          |        | 5   |            | 6.1117   |                                                     |                         |    |    |   |   |   |   |
| FN0869  | -1.027                 | 4.197                |          |          | 3      |     | 3.0000     |          | AAL95065.1  Hydrolase (HAD superfamily)             |                         |    |    |   |   |   |   |
|         |                        |                      |          |          |        | 5   |            | 6.1117   |                                                     |                         |    |    |   |   |   |   |
| FN0870  | 0.817                  | 6.040                |          |          | 10     |     | 10.0000    |          | AAL95066.1  Rhodanese-related sulfurtransferases    |                         |    |    |   |   |   |   |
|         |                        |                      |          |          | 9      | 5   | 11.5312    | 6.1117   |                                                     |                         |    |    |   |   |   |   |

Show detected proteins only  
 Show all proteins  
 Filter by category:

Proteins found: 1297

Enter (or paste) list of ORFs

Find ORFs

Test Cutoff

q-Value

p-Value

.005

| Signif | Direction | Applies To   |
|--------|-----------|--------------|
| yes    | +         | ratios, bars |
| no     | n/a       | bars         |
| yes    | -         | ratios, bars |
| yes    | +         | p-, q-Values |
| yes    | -         | p-, q-Values |

Dot Plots Dot Plots

Fn Summary Table FnPg vs Fn FnSg vs Fn FnPgSg vs Fn FnPgSg vs FnPg FnSg vs FnPg FnPgSg vs FnSg Fn Coverage

| Protein | FnPgSg vs Fn           |                      |          |          | Raw    |    | Normalized |         | Description                                                  | Log <sub>2</sub> Ratios |    |    |   |   |   |   |
|---------|------------------------|----------------------|----------|----------|--------|----|------------|---------|--------------------------------------------------------------|-------------------------|----|----|---|---|---|---|
|         | Log <sub>2</sub> Ratio | Log <sub>2</sub> Sum | q-Value  | p-Value  | FnPgSg | Fn | FnPgSg     | Fn      |                                                              | -6                      | -4 | -2 | 0 | 2 | 4 | 6 |
| FN0871  | -0.535                 | 6.875                |          |          | 9      | 9  | 9.0000     | 10.1867 | AAL95067.1  3-dehydroquinase synthase                        |                         |    |    |   |   |   |   |
|         |                        |                      |          |          |        | 13 |            | 15.8904 |                                                              |                         |    |    |   |   |   |   |
| FN0873  | -0.043                 | 8.609                | 1.209e-1 | 6.963e-1 | 21     | 16 | 21.0000    | 18.1097 | AAL95069.1  Protease IV                                      |                         |    |    |   |   |   |   |
|         |                        |                      |          |          | 14     | 18 | 17.9374    | 22.0020 |                                                              |                         |    |    |   |   |   |   |
| FN0875  |                        |                      |          |          | 5      |    | 5.0000     |         | AAL95071.1  23S rRNA methyltransferase                       |                         |    |    |   |   |   |   |
|         |                        |                      |          |          |        |    |            |         |                                                              |                         |    |    |   |   |   |   |
| FN0878  | 0.358                  | 8.934                | 1.732e-2 | 7.67e-2  | 27     | 14 | 27.0000    | 15.8460 | AAL95074.1  Transcriptional regulator, GntR family           |                         |    |    |   |   |   |   |
|         |                        |                      |          |          | 18     | 19 | 23.0623    | 23.2244 |                                                              |                         |    |    |   |   |   |   |
| FN0885  |                        |                      |          |          |        |    |            |         | AAL95081.1  Hemin-binding periplasmic protein hmuT precursor |                         |    |    |   |   |   |   |
|         |                        |                      |          |          |        | 10 |            | 12.2234 |                                                              |                         |    |    |   |   |   |   |
| FN0886  | -2.221                 | 5.391                |          |          | 3      | 15 | 3.0000     | 16.9779 | AAL95082.1  Hemin receptor                                   |                         |    |    |   |   |   |   |
|         |                        |                      |          |          |        | 9  |            | 11.0010 |                                                              |                         |    |    |   |   |   |   |
| FN0887  | -0.665                 | 11.445               | 1.368e-3 | 3.7e-3   | 48     | 57 | 48.0000    | 64.5160 | AAL95083.1  Oligoendopeptidase F                             |                         |    |    |   |   |   |   |
|         |                        |                      |          |          | 28     | 56 | 35.8747    | 68.4508 |                                                              |                         |    |    |   |   |   |   |
| FN0888  | -0.277                 | 9.804                | 4.042e-2 | 2.037e-1 | 21     | 29 | 21.0000    | 32.8239 | AAL95084.1  Uracil permease                                  |                         |    |    |   |   |   |   |
|         |                        |                      |          |          | 26     | 27 | 33.3122    | 33.0031 |                                                              |                         |    |    |   |   |   |   |
| FN0889  |                        |                      |          |          |        |    |            |         | AAL95085.1  hypothetical protein                             |                         |    |    |   |   |   |   |
|         |                        |                      |          |          |        | 9  |            | 10.1867 |                                                              |                         |    |    |   |   |   |   |
| FN0893  | -0.745                 | 7.623                | 5.864e-3 | 2.207e-2 | 14     | 17 | 14.0000    | 19.2416 | AAL95089.1  Hypothetical protein                             |                         |    |    |   |   |   |   |
|         |                        |                      |          |          | 6      | 14 | 7.6874     | 17.1127 |                                                              |                         |    |    |   |   |   |   |
| FN0896  | -0.412                 | 8.220                | 1.307e-2 | 5.572e-2 | 12     | 19 | 12.0000    | 21.5053 | AAL95092.1  Hypothetical protein                             |                         |    |    |   |   |   |   |
|         |                        |                      |          |          | 14     | 15 | 17.9374    | 18.3350 |                                                              |                         |    |    |   |   |   |   |
| FN0900  |                        |                      |          |          |        |    |            |         | AAL95096.1  Metal dependent hydrolase                        |                         |    |    |   |   |   |   |
|         |                        |                      |          |          |        | 4  |            | 4.5274  |                                                              |                         |    |    |   |   |   |   |
| FN0901  |                        |                      |          |          |        |    |            |         | AAL95097.1  DNA polymerase, bacteriophage-type               |                         |    |    |   |   |   |   |
|         |                        |                      |          |          |        | 5  |            | 6.1117  |                                                              |                         |    |    |   |   |   |   |
| FN0902  |                        |                      |          |          |        |    |            |         | AAL95098.1  5-formyltetrahydrofolate cyclo-ligase            |                         |    |    |   |   |   |   |
|         |                        |                      |          |          | 6      |    | 6.0000     |         |                                                              |                         |    |    |   |   |   |   |
| FN0903  | 0.458                  | 7.418                | 3.434e-3 | 1.158e-2 | 14     | 10 | 14.0000    | 11.3186 | AAL95099.1  Polysialic acid capsule expression protein kpsF  |                         |    |    |   |   |   |   |
|         |                        |                      |          |          | 13     | 9  | 16.6561    | 11.0010 |                                                              |                         |    |    |   |   |   |   |
| FN0905  | -0.658                 | 7.805                | 1.363e-4 | 1.691e-4 | 11     | 17 | 11.0000    | 19.2416 | AAL95101.1  Hypothetical protein                             |                         |    |    |   |   |   |   |
|         |                        |                      |          |          | 10     | 15 | 12.8124    | 18.3350 |                                                              |                         |    |    |   |   |   |   |

Show detected proteins only  
 Show all proteins  
 Filter by category:

Proteins found: 1297

Enter (or paste) list of ORFs

Find ORFs

Test Cutoff

q-Value p-Value

.005

| Signif | Direction | Applies To   |
|--------|-----------|--------------|
| yes    | +         | ratios, bars |
| no     | n/a       | bars         |
| yes    | -         | ratios, bars |
| yes    | +         | p-, q-Values |
| yes    | -         | p-, q-Values |

Dot Plots Dot Plots

Fn Summary Table FnPg vs Fn FnSg vs Fn FnPgSg vs Fn FnPgSg vs FnPg FnSg vs FnPg FnPgSg vs FnSg Fn Coverage

| Protein | FnPgSg vs Fn           |                      |          |          | Raw    |     | Normalized |          | Description                                                                        | Log <sub>2</sub> Ratios |    |    |   |   |   |   |
|---------|------------------------|----------------------|----------|----------|--------|-----|------------|----------|------------------------------------------------------------------------------------|-------------------------|----|----|---|---|---|---|
|         | Log <sub>2</sub> Ratio | Log <sub>2</sub> Sum | q-Value  | p-Value  | FnPgSg | Fn  | FnPgSg     | Fn       |                                                                                    | -6                      | -4 | -2 | 0 | 2 | 4 | 6 |
| FN0906  | -1.134                 | 8.049                | 5.811e-4 | 1.208e-3 | 13     | 21  | 13.0000    | 23.7690  | AAL95102.1  Glycerol-3-phosphate dehydrogenase [NAD(P)+]                           |                         |    |    |   |   |   |   |
|         |                        |                      |          |          | 7      | 20  | 8.9687     | 24.4467  |                                                                                    |                         |    |    |   |   |   |   |
| FN0908  | -0.797                 | 8.726                | 1.811e-3 | 5.357e-3 | 12     | 22  | 12.0000    | 24.9009  | AAL95104.1  Tpl protein                                                            |                         |    |    |   |   |   |   |
|         |                        |                      |          |          | 15     | 24  | 19.2186    | 29.3361  |                                                                                    |                         |    |    |   |   |   |   |
| FN0910  |                        |                      |          |          |        | 3   |            | 3.3956   | AAL95106.1  Nicotinate-nucleotide--dimethylbenzimidazole phosphoribosyltransferase |                         |    |    |   |   |   |   |
|         |                        |                      |          |          |        | 9   |            | 11.0010  |                                                                                    |                         |    |    |   |   |   |   |
| FN0911  | -0.519                 | 6.133                |          |          | 7      | 8   | 7.0000     | 9.0549   | AAL95107.1  Alpha-ribazole-5'-phosphate phosphatase                                |                         |    |    |   |   |   |   |
|         |                        |                      |          |          |        | 9   |            | 11.0010  |                                                                                    |                         |    |    |   |   |   |   |
| FN0913  | -1.458                 | 4.628                |          |          | 3      | 7   | 3.0000     | 7.9230   | AAL95109.1  Cobinamide kinase                                                      |                         |    |    |   |   |   |   |
|         |                        |                      |          |          |        | 7   |            | 8.5563   |                                                                                    |                         |    |    |   |   |   |   |
| FN0915  | 0.092                  | 9.413                | 1.574e-3 | 4.491e-3 | 27     | 22  | 27.0000    | 24.9009  | AAL95111.1  PTS system, N-acetylglucosamine-specific IIA component                 |                         |    |    |   |   |   |   |
|         |                        |                      |          |          | 21     | 21  | 26.9060    | 25.6690  |                                                                                    |                         |    |    |   |   |   |   |
| FN0916  | 0.625                  | 15.448               | 5.657e-3 | 2.116e-2 | 301    | 141 | 301.0000   | 159.5921 | AAL95112.1  Hypothetical Exported Protein                                          |                         |    |    |   |   |   |   |
|         |                        |                      |          |          | 175    | 148 | 224.2169   | 180.9057 |                                                                                    |                         |    |    |   |   |   |   |
| FN0917  | -1.390                 | 5.275                |          |          |        | 7   |            | 7.9230   | AAL95113.1  Hypothetical protein                                                   |                         |    |    |   |   |   |   |
|         |                        |                      |          |          | 3      | 10  | 3.8437     | 12.2234  |                                                                                    |                         |    |    |   |   |   |   |
| FN0920  | -0.352                 | 5.842                |          |          | 7      |     | 7.0000     |          | AAL95116.1  Protease HTPX                                                          |                         |    |    |   |   |   |   |
|         |                        |                      |          |          | 5      | 7   | 6.4062     | 8.5563   |                                                                                    |                         |    |    |   |   |   |   |
| FN0921  | 0.422                  | 6.319                | 4.465e-2 | 2.278e-1 | 13     | 5   | 13.0000    | 5.6593   | AAL95117.1  Hypothetical protein                                                   |                         |    |    |   |   |   |   |
|         |                        |                      |          |          | 6      | 8   | 7.6874     | 9.7787   |                                                                                    |                         |    |    |   |   |   |   |
| FN0922  |                        |                      |          |          | 3      |     | 3.0000     |          | AAL95118.1  Homoserine kinase                                                      |                         |    |    |   |   |   |   |
| FN0924  |                        |                      |          |          | 3      |     | 3.8437     |          | AAL95120.1  Hypothetical protein                                                   |                         |    |    |   |   |   |   |
| FN0925  | -0.431                 | 6.553                | 2.228e-2 | 1.019e-1 | 9      | 8   | 9.0000     | 9.0549   | AAL95121.1  Hypothetical protein                                                   |                         |    |    |   |   |   |   |
|         |                        |                      |          |          | 6      | 11  | 7.6874     | 13.4457  |                                                                                    |                         |    |    |   |   |   |   |
| FN0926  | 0.381                  | 5.908                |          |          | 10     | 6   | 10.0000    | 6.7912   | AAL95122.1  GTP pyrophosphokinase                                                  |                         |    |    |   |   |   |   |
|         |                        |                      |          |          | 6      |     | 7.6874     |          |                                                                                    |                         |    |    |   |   |   |   |
| FN0928  | -0.420                 | 5.552                |          |          | 8      | 7   | 8.0000     | 7.9230   | AAL95124.1  O-sialoglycoprotein endopeptidase                                      |                         |    |    |   |   |   |   |
|         |                        |                      |          |          | 3      |     | 3.8437     |          |                                                                                    |                         |    |    |   |   |   |   |
| FN0929  |                        |                      |          |          | 6      |     | 7.6874     |          | AAL95125.1  ATP/GTP hydrolase                                                      |                         |    |    |   |   |   |   |

Show detected proteins only  
 Show all proteins  
 Filter by category:

Proteins found: 1297

Enter (or paste) list of ORFs

Find ORFs

Test Cutoff

q-Value p-Value

.005

| Signif | Direction | Applies To   |
|--------|-----------|--------------|
| yes    | +         | ratios, bars |
| no     | n/a       | bars         |
| yes    | -         | ratios, bars |
| yes    | +         | p-, q-Values |
| yes    | -         | p-, q-Values |

Dot Plots Dot Plots

| Protein | FnPgSg vs Fn           |                      |          |          | Raw    |     | Normalized |          | Description                                              | Log <sub>2</sub> Ratios |    |    |   |   |   |   |
|---------|------------------------|----------------------|----------|----------|--------|-----|------------|----------|----------------------------------------------------------|-------------------------|----|----|---|---|---|---|
|         | Log <sub>2</sub> Ratio | Log <sub>2</sub> Sum | q-Value  | p-Value  | FnPgSg | Fn  | FnPgSg     | Fn       |                                                          | -6                      | -4 | -2 | 0 | 2 | 4 | 6 |
| FN0930  |                        |                      |          |          |        | 16  |            | 18.1097  | AAL95126.1  Glycerol-3-phosphate cytidyltransferase      |                         |    |    |   |   |   |   |
|         |                        |                      |          |          |        | 14  |            | 17.1127  |                                                          |                         |    |    |   |   |   |   |
| FN0932  | -1.612                 | 6.563                | 8.808e-5 | 8.998e-5 | 6      | 16  | 6.0000     | 18.1097  | AAL95128.1  Hypothetical protein                         |                         |    |    |   |   |   |   |
|         |                        |                      |          |          | 4      | 13  | 5.1250     | 15.8904  |                                                          |                         |    |    |   |   |   |   |
| FN0933  |                        |                      |          |          | 3      |     | 3.0000     |          | AAL95129.1  3-phosphoshikimate 1-carboxyvinyltransferase |                         |    |    |   |   |   |   |
|         |                        |                      |          |          |        |     |            |          |                                                          |                         |    |    |   |   |   |   |
| FN0934  |                        |                      |          |          |        | 8   |            | 9.0549   | AAL95130.1  Chorismate synthase                          |                         |    |    |   |   |   |   |
|         |                        |                      |          |          |        | 6   |            | 7.3340   |                                                          |                         |    |    |   |   |   |   |
| FN0940  |                        |                      |          |          | 10     |     | 10.0000    |          | AAL95136.1  Hypothetical protein                         |                         |    |    |   |   |   |   |
|         |                        |                      |          |          | 9      |     | 11.5312    |          |                                                          |                         |    |    |   |   |   |   |
| FN0941  | 0.493                  | 9.225                | 3.183e-3 | 1.059e-2 | 26     | 17  | 26.0000    | 19.2416  | AAL95137.1  Gamma-glutamyltranspeptidase                 |                         |    |    |   |   |   |   |
|         |                        |                      |          |          | 25     | 18  | 32.0310    | 22.0020  |                                                          |                         |    |    |   |   |   |   |
| FN0943  | -0.898                 | 5.187                | 1.816e-4 | 2.518e-4 | 5      | 7   | 5.0000     | 7.9230   | AAL95139.1  Sensory Transduction Protein Kinase          |                         |    |    |   |   |   |   |
|         |                        |                      |          |          | 3      | 7   | 3.8437     | 8.5563   |                                                          |                         |    |    |   |   |   |   |
| FN0947  | 0.067                  | 13.138               | 1.119e-1 | 6.376e-1 | 88     | 71  | 88.0000    | 80.3620  | AAL95143.1  Hypothetical protein                         |                         |    |    |   |   |   |   |
|         |                        |                      |          |          | 83     | 86  | 106.3429   | 105.1209 |                                                          |                         |    |    |   |   |   |   |
| FN0949  | -0.722                 | 15.710               | 1.517e-4 | 1.958e-4 | 185    | 251 | 185.0000   | 284.0966 | AAL95145.1  DNA helicase                                 |                         |    |    |   |   |   |   |
|         |                        |                      |          |          | 137    | 254 | 175.5298   | 310.4732 |                                                          |                         |    |    |   |   |   |   |
| FN0951  |                        |                      |          |          |        | 16  |            | 18.1097  | AAL95147.1  Precorrin-3B C17-methyltransferase           |                         |    |    |   |   |   |   |
|         |                        |                      |          |          |        | 13  |            | 15.8904  |                                                          |                         |    |    |   |   |   |   |
| FN0952  |                        |                      |          |          |        |     |            |          | AAL95148.1  Cobalamin biosynthesis protein G             |                         |    |    |   |   |   |   |
|         |                        |                      |          |          |        | 6   |            | 7.3340   |                                                          |                         |    |    |   |   |   |   |
| FN0957  | 0.546                  | 8.300                | 2.589e-2 | 1.21e-1  | 16     | 13  | 16.0000    | 14.7142  | AAL95153.1  Precorrin-4 C11-methyltransferase            |                         |    |    |   |   |   |   |
|         |                        |                      |          |          | 21     | 12  | 26.9060    | 14.6680  |                                                          |                         |    |    |   |   |   |   |
| FN0958  |                        |                      |          |          |        | 23  |            | 26.0328  | AAL95154.1  unknown                                      |                         |    |    |   |   |   |   |
|         |                        |                      |          |          |        | 18  |            | 22.0020  |                                                          |                         |    |    |   |   |   |   |
| FN0959  | -1.205                 | 8.846                | 2.769e-3 | 8.945e-3 | 18     | 23  | 18.0000    | 26.0328  | AAL95155.1  Precorrin-2 C20-methyltransferase            |                         |    |    |   |   |   |   |
|         |                        |                      |          |          | 8      | 32  | 10.2499    | 39.1147  |                                                          |                         |    |    |   |   |   |   |
| FN0961  |                        |                      |          |          |        | 4   |            | 4.5274   | AAL95157.1  Hypothetical protein                         |                         |    |    |   |   |   |   |
|         |                        |                      |          |          |        | 6   |            | 7.3340   |                                                          |                         |    |    |   |   |   |   |
| FN0962  | -1.249                 | 9.795                | 3.758e-5 | 2.628e-5 | 22     | 38  | 22.0000    | 43.0106  | AAL95158.1  Hypothetical cytosolic protein               |                         |    |    |   |   |   |   |
|         |                        |                      |          |          | 13     | 40  | 16.6561    | 48.8934  |                                                          |                         |    |    |   |   |   |   |

Show detected proteins only  
 Show all proteins  
 Filter by category:

Proteins found: 1297

Enter (or paste) list of ORFs

Find ORFs

Test Cutoff

q-Value

p-Value

.005

| Signif | Direction | Applies To   |
|--------|-----------|--------------|
| yes    | +         | ratios, bars |
| no     | n/a       | bars         |
| yes    | -         | ratios, bars |
| yes    | +         | p-, q-Values |
| yes    | -         | p-, q-Values |

Dot Plots Dot Plots

Fn Summary Table FnPg vs Fn FnSg vs Fn FnPgSg vs Fn FnPgSg vs FnPg FnSg vs FnPg FnPgSg vs FnSg Fn Coverage

| Protein | FnPgSg vs Fn           |                      |          |          | Raw    |      | Normalized |           | Description                                                              | Log <sub>2</sub> Ratios |    |    |   |   |   |   |
|---------|------------------------|----------------------|----------|----------|--------|------|------------|-----------|--------------------------------------------------------------------------|-------------------------|----|----|---|---|---|---|
|         | Log <sub>2</sub> Ratio | Log <sub>2</sub> Sum | q-Value  | p-Value  | FnPgSg | Fn   | FnPgSg     | Fn        |                                                                          | -6                      | -4 | -2 | 0 | 2 | 4 | 6 |
| FN0964  |                        |                      |          |          | 5      |      | 6.4062     |           | AAL95160.1  Precorrin-8W decarboxylase                                   |                         |    |    |   |   |   |   |
| FN0965  | 0.503                  | 10.266               | 2.95e-2  | 1.408e-1 | 31     | 24   | 31.0000    | 27.1646   | AAL95161.1  D-3-phosphoglycerate dehydrogenase                           |                         |    |    |   |   |   |   |
| FN0967  |                        |                      |          |          | 3      |      | 3.0000     |           | AAL95163.1  CbiD protein                                                 |                         |    |    |   |   |   |   |
| FN0970  | -0.337                 | 8.543                | 4.225e-3 | 1.49e-2  | 19     | 20   | 19.0000    | 22.6372   | AAL95166.1  Precorrin-8X methylmutase                                    |                         |    |    |   |   |   |   |
|         |                        |                      |          |          | 12     | 17   | 15.3749    | 20.7797   |                                                                          |                         |    |    |   |   |   |   |
| FN0976  | 0.098                  | 10.525               | 2.476e-2 | 1.149e-1 | 41     | 31   | 41.0000    | 35.0876   | AAL95172.1  Hypothetical protein                                         |                         |    |    |   |   |   |   |
|         |                        |                      |          |          | 30     | 32   | 38.4372    | 39.1147   |                                                                          |                         |    |    |   |   |   |   |
| FN0977  | 0.906                  | 7.263                |          |          | 16     | 8    | 16.0000    | 9.0549    | AAL95173.1  Cobyric acid synthase                                        |                         |    |    |   |   |   |   |
|         |                        |                      |          |          | 14     |      | 17.9374    |           |                                                                          |                         |    |    |   |   |   |   |
| FN0981  | 0.225                  | 13.832               | 1.476e-2 | 6.401e-2 | 142    | 98   | 142.0000   | 110.9222  | AAL95177.1  Phosphoribosylamine--glycine ligase                          |                         |    |    |   |   |   |   |
|         |                        |                      |          |          | 93     | 92   | 119.1553   | 112.4549  |                                                                          |                         |    |    |   |   |   |   |
| FN0982  | -0.629                 | 15.961               | 6.087e-4 | 1.282e-3 | 223    | 272  | 223.0000   | 307.8656  | AAL95178.1  Phosphoribosylaminoimidazolecarboxamide formyltransferase    |                         |    |    |   |   |   |   |
|         |                        |                      |          |          | 143    | 262  | 183.2172   | 320.2519  |                                                                          |                         |    |    |   |   |   |   |
| FN0983  | -0.751                 | 13.862               | 3.496e-5 | 2.26e-5  | 101    | 135  | 101.0000   | 152.8010  | AAL95179.1  Hypothetical protein                                         |                         |    |    |   |   |   |   |
|         |                        |                      |          |          | 68     | 134  | 87.1243    | 163.7930  |                                                                          |                         |    |    |   |   |   |   |
| FN0984  | -1.455                 | 7.790                | 2.059e-4 | 3.036e-4 | 9      | 23   | 9.0000     | 26.0328   | AAL95180.1  Tetracenomycin polyketide synthesis O-methyltransferase tcmP |                         |    |    |   |   |   |   |
|         |                        |                      |          |          | 7      | 19   | 8.9687     | 23.2244   |                                                                          |                         |    |    |   |   |   |   |
| FN0985  | 0.822                  | 7.069                | 5.329e-3 | 1.973e-2 | 18     | 10   | 18.0000    | 11.3186   | AAL95181.1  Phosphoribosylglycinamide formyltransferase                  |                         |    |    |   |   |   |   |
|         |                        |                      |          |          | 10     | 5    | 12.8124    | 6.1117    |                                                                          |                         |    |    |   |   |   |   |
| FN0986  | 0.300                  | 14.458               | 9.588e-3 | 3.932e-2 | 151    | 119  | 151.0000   | 134.6912  | AAL95182.1  Phosphoribosylformylglycinamide cyclase                      |                         |    |    |   |   |   |   |
|         |                        |                      |          |          | 142    | 111  | 181.9360   | 135.6792  |                                                                          |                         |    |    |   |   |   |   |
| FN0987  | -0.848                 | 13.270               | 1.14e-3  | 2.853e-3 | 70     | 106  | 70.0000    | 119.9770  | AAL95183.1  Amidophosphoribosyltransferase                               |                         |    |    |   |   |   |   |
|         |                        |                      |          |          | 61     | 120  | 78.1556    | 146.6803  |                                                                          |                         |    |    |   |   |   |   |
| FN0988  | 0.276                  | 16.528               | 9.733e-4 | 2.308e-3 | 351    | 243  | 351.0000   | 275.0417  | AAL95184.1  Phosphoribosylamidoimidazole-succinocarboxamide synthase     |                         |    |    |   |   |   |   |
|         |                        |                      |          |          | 254    | 232  | 325.4348   | 283.5818  |                                                                          |                         |    |    |   |   |   |   |
| FN0989  | 0.366                  | 14.907               | 2.992e-3 | 9.854e-3 | 184    | 141  | 184.0000   | 159.5921  | AAL95185.1  Phosphoribosylaminoimidazole carboxylase catalytic subunit   |                         |    |    |   |   |   |   |
|         |                        |                      |          |          | 167    | 122  | 213.9670   | 149.1249  |                                                                          |                         |    |    |   |   |   |   |
| FN0990  | -0.210                 | 20.455               | 1.551e-3 | 4.408e-3 | 1063   | 1164 | 1063.0000  | 1317.4838 | AAL95186.1  Phosphoribosylformylglycinamide synthase                     |                         |    |    |   |   |   |   |
|         |                        |                      |          |          | 910    | 1032 | 1165.9279  | 1261.4502 |                                                                          |                         |    |    |   |   |   |   |

Show detected proteins only  
 Show all proteins  
 Filter by category:

Proteins found: 1297

Enter (or paste) list of ORFs

Find ORFs

Test Cutoff

q-Value

p-Value

.005

| Signif | Direction | Applies To   |
|--------|-----------|--------------|
| yes    | +         | ratios, bars |
| no     | n/a       | bars         |
| yes    | -         | ratios, bars |
| yes    | +         | p-, q-Values |
| yes    | -         | p-, q-Values |

Dot Plots Dot Plots

Fn Summary Table

FnPg vs Fn

FnSg vs Fn

FnPgSg vs Fn

FnPgSg vs FnPg

FnSg vs FnPg

FnPgSg vs FnSg

Fn Coverage

| Protein | FnPgSg vs Fn           |                      |          |          | Raw    |     | Normalized |          | Description                                                            | Log <sub>2</sub> Ratios |    |    |   |   |   |   |
|---------|------------------------|----------------------|----------|----------|--------|-----|------------|----------|------------------------------------------------------------------------|-------------------------|----|----|---|---|---|---|
|         | Log <sub>2</sub> Ratio | Log <sub>2</sub> Sum | q-Value  | p-Value  | FnPgSg | Fn  | FnPgSg     | Fn       |                                                                        | -6                      | -4 | -2 | 0 | 2 | 4 | 6 |
| FN0991  | 0.894                  | 9.003                | 2.917e-3 | 9.545e-3 | 31     | 11  | 31.0000    | 12.4504  | AAL95187.1  CDP-diacylglycerol--serine O-phosphatidyltransferase       |                         |    |    |   |   |   |   |
|         |                        |                      |          |          | 24     | 17  | 30.7497    | 20.7797  |                                                                        |                         |    |    |   |   |   |   |
| FN0992  | -0.556                 | 9.721                | 1.545e-3 | 4.381e-3 | 21     | 32  | 21.0000    | 36.2195  | AAL95188.1  ADP-heptose:LPS heptosyltransferase II                     |                         |    |    |   |   |   |   |
|         |                        |                      |          |          | 21     | 28  | 26.9060    | 34.2254  |                                                                        |                         |    |    |   |   |   |   |
| FN0994  | 0.167                  | 14.088               | 6.077e-4 | 1.279e-3 | 140    | 112 | 140.0000   | 126.7682 | AAL95190.1  Hypothetical protein                                       |                         |    |    |   |   |   |   |
|         |                        |                      |          |          | 109    | 100 | 139.6551   | 122.2336 |                                                                        |                         |    |    |   |   |   |   |
| FN0997  | -0.204                 | 9.873                | 5.1e-2   | 2.645e-1 | 34     | 30  | 34.0000    | 33.9558  | AAL95193.1  Hypothetical protein                                       |                         |    |    |   |   |   |   |
|         |                        |                      |          |          | 18     | 26  | 23.0623    | 31.7807  |                                                                        |                         |    |    |   |   |   |   |
| FN0998  | -0.900                 | 13.567               | 7.919e-4 | 1.777e-3 | 69     | 132 | 69.0000    | 149.4054 | AAL95194.1  Dipeptide-binding protein                                  |                         |    |    |   |   |   |   |
|         |                        |                      |          |          | 72     | 124 | 92.2492    | 151.5696 |                                                                        |                         |    |    |   |   |   |   |
| FN0999  | -1.794                 | 7.434                | 1.731e-3 | 5.06e-3  | 9      | 26  | 9.0000     | 29.4283  | AAL95195.1  Deblocking aminopeptidase                                  |                         |    |    |   |   |   |   |
|         |                        |                      |          |          | 4      | 16  | 5.1250     | 19.5574  |                                                                        |                         |    |    |   |   |   |   |
| FN1000  | -0.673                 | 11.477               | 3.788e-4 | 6.974e-4 | 41     | 63  | 41.0000    | 71.3071  | AAL95196.1  Biotin synthase                                            |                         |    |    |   |   |   |   |
|         |                        |                      |          |          | 34     | 52  | 43.5621    | 63.5614  |                                                                        |                         |    |    |   |   |   |   |
| FN1001  | -0.383                 | 9.074                | 1.276e-2 | 5.425e-2 | 24     | 22  | 24.0000    | 24.9009  | AAL95197.1  Dethiobiotin synthetase                                    |                         |    |    |   |   |   |   |
|         |                        |                      |          |          | 13     | 23  | 16.6561    | 28.1137  |                                                                        |                         |    |    |   |   |   |   |
| FN1002  | -0.790                 | 11.096               | 8.906e-4 | 2.059e-3 | 34     | 59  | 34.0000    | 66.7797  | AAL95198.1  Adenosylmethionine-8-amino-7-oxononanoate aminotransferase |                         |    |    |   |   |   |   |
|         |                        |                      |          |          | 29     | 46  | 37.1559    | 56.2274  |                                                                        |                         |    |    |   |   |   |   |
| FN1003  | 0.334                  | 10.456               | 1.132e-2 | 4.74e-2  | 47     | 32  | 47.0000    | 36.2195  | AAL95199.1  Outer membrane protein P1 precursor                        |                         |    |    |   |   |   |   |
|         |                        |                      |          |          | 29     | 25  | 37.1559    | 30.5584  |                                                                        |                         |    |    |   |   |   |   |
| FN1004  | -0.465                 | 7.544                | 4.058e-2 | 2.047e-1 | 13     | 10  | 13.0000    | 11.3186  | AAL95200.1  Transcriptional regulator, TetR family                     |                         |    |    |   |   |   |   |
|         |                        |                      |          |          | 8      | 17  | 10.2499    | 20.7797  |                                                                        |                         |    |    |   |   |   |   |
| FN1005  | -1.648                 | 11.090               | 2.823e-5 | 1.529e-5 | 22     | 78  | 22.0000    | 88.2850  | AAL95201.1  Hypothetical protein                                       |                         |    |    |   |   |   |   |
|         |                        |                      |          |          | 24     | 63  | 30.7497    | 77.0071  |                                                                        |                         |    |    |   |   |   |   |
| FN1008  |                        |                      |          |          |        | 4   |            | 4.5274   | AAL95204.1  Hypothetical protein                                       |                         |    |    |   |   |   |   |
|         |                        |                      |          |          |        |     |            |          |                                                                        |                         |    |    |   |   |   |   |
| FN1009  |                        |                      |          |          |        | 8   |            | 9.0549   | AAL95205.1  Hypothetical protein                                       |                         |    |    |   |   |   |   |
|         |                        |                      |          |          |        | 3   |            | 3.6670   |                                                                        |                         |    |    |   |   |   |   |
| FN1010  | 0.075                  | 14.592               | 3.787e-2 | 1.888e-1 | 165    | 128 | 165.0000   | 144.8779 | AAL95206.1  Hypothetical cytosolic protein                             |                         |    |    |   |   |   |   |
|         |                        |                      |          |          | 123    | 132 | 157.5925   | 161.3483 |                                                                        |                         |    |    |   |   |   |   |
| FN1011  | -1.140                 | 5.855                |          |          |        | 7   |            | 7.9230   | AAL95207.1  MGPA protein                                               |                         |    |    |   |   |   |   |
|         |                        |                      |          |          | 4      | 12  | 5.1250     | 14.6680  |                                                                        |                         |    |    |   |   |   |   |

Show detected proteins only  
 Show all proteins  
 Filter by category:

Proteins found: 1297

Enter (or paste) list of ORFs

Find ORFs

Test Cutoff

q-Value

p-Value

.005

| Signif | Direction | Applies To   |
|--------|-----------|--------------|
| yes    | +         | ratios, bars |
| no     | n/a       | bars         |
| yes    | -         | ratios, bars |
| yes    | +         | p-, q-Values |
| yes    | -         | p-, q-Values |

Dot Plots

Fn Summary Table

FnPg vs Fn

FnSg vs Fn

FnPgSg vs Fn

FnPgSg vs FnPg

FnSg vs FnPg

FnPgSg vs FnSg

Fn Coverage

| Protein | FnPgSg vs Fn           |                      |          |          | Raw    |      | Normalized |           | Description                                                  | Log <sub>2</sub> Ratios |    |    |   |   |   |   |
|---------|------------------------|----------------------|----------|----------|--------|------|------------|-----------|--------------------------------------------------------------|-------------------------|----|----|---|---|---|---|
|         | Log <sub>2</sub> Ratio | Log <sub>2</sub> Sum | q-Value  | p-Value  | FnPgSg | Fn   | FnPgSg     | Fn        |                                                              | -6                      | -4 | -2 | 0 | 2 | 4 | 6 |
| FN1012  | -0.881                 | 7.661                | 8.138e-4 | 1.838e-3 | 12     | 19   | 12.0000    | 21.5053   | AAL95208.1  HPR(Ser) kinase                                  |                         |    |    |   |   |   |   |
|         |                        |                      |          |          | 7      | 14   | 8.9687     | 17.1127   |                                                              |                         |    |    |   |   |   |   |
| FN1014  | -1.798                 | 7.064                | 2.864e-3 | 9.327e-3 | 6      | 23   | 6.0000     | 26.0328   | AAL95210.1  Folylpolylglutamate synthase                     |                         |    |    |   |   |   |   |
|         |                        |                      |          |          | 5      | 14   | 6.4062     | 17.1127   |                                                              |                         |    |    |   |   |   |   |
| FN1015  | -0.513                 | 8.696                | 2.865e-2 | 1.361e-1 | 20     | 16   | 20.0000    | 18.1097   | AAL95211.1  5'-methylthioadenosine nucleosidase              |                         |    |    |   |   |   |   |
|         |                        |                      |          |          | 11     | 25   | 14.0936    | 30.5584   |                                                              |                         |    |    |   |   |   |   |
| FN1016  | -1.958                 | 7.224                | 1.7e-7   | 8.462e-9 | 6      | 21   | 6.0000     | 23.7690   | AAL95212.1  Lipid A biosynthesis lauroyl acyltransferase     |                         |    |    |   |   |   |   |
|         |                        |                      |          |          | 5      | 20   | 6.4062     | 24.4467   |                                                              |                         |    |    |   |   |   |   |
| FN1017  | -0.389                 | 13.554               | 1.469e-3 | 4.093e-3 | 93     | 104  | 93.0000    | 117.7133  | AAL95213.1  Hypothetical Exported Protein                    |                         |    |    |   |   |   |   |
|         |                        |                      |          |          | 77     | 109  | 98.6554    | 133.2346  |                                                              |                         |    |    |   |   |   |   |
| FN1019  | 1.629                  | 22.153               | 4.008e-4 | 7.532e-4 | 3484   | 1077 | 3484.0000  | 1219.0121 | AAL95215.1  3-hydroxybutyryl-CoA dehydrogenase               |                         |    |    |   |   |   |   |
|         |                        |                      |          |          | 3209   | 1012 | 4111.4974  | 1237.0035 |                                                              |                         |    |    |   |   |   |   |
| FN1020  | 0.845                  | 16.396               | 4.69e-3  | 1.689e-2 | 331    | 195  | 331.0000   | 220.7125  | AAL95216.1  3-hydroxybutyryl-CoA dehydratase                 |                         |    |    |   |   |   |   |
|         |                        |                      |          |          | 356    | 178  | 456.1212   | 217.5757  |                                                              |                         |    |    |   |   |   |   |
| FN1022  | -1.792                 | 9.007                | 6.154e-3 | 2.337e-2 | 9      | 26   | 9.0000     | 29.4283   | AAL95218.1  Calcium-transporting ATPase                      |                         |    |    |   |   |   |   |
|         |                        |                      |          |          | 12     | 45   | 15.3749    | 55.0051   |                                                              |                         |    |    |   |   |   |   |
| FN1023  |                        |                      |          |          | 7      |      | 7.0000     |           | AAL95219.1  5-Nitroimidazole antibiotic resistance protein   |                         |    |    |   |   |   |   |
|         |                        |                      |          |          |        |      |            |           |                                                              |                         |    |    |   |   |   |   |
| FN1024  | -0.164                 | 20.387               | 8.373e-2 | 4.604e-1 | 1379   | 1079 | 1379.0000  | 1221.2758 | AAL95220.1  DNA-binding protein HU                           |                         |    |    |   |   |   |   |
|         |                        |                      |          |          | 651    | 1029 | 834.0869   | 1257.7832 |                                                              |                         |    |    |   |   |   |   |
| FN1025  | 0.114                  | 7.736                | 6.586e-2 | 3.515e-1 | 15     | 14   | 15.0000    | 15.8460   | AAL95221.1  Guanine-hypoxanthine permease                    |                         |    |    |   |   |   |   |
|         |                        |                      |          |          | 12     | 10   | 15.3749    | 12.2234   |                                                              |                         |    |    |   |   |   |   |
| FN1026  |                        |                      |          |          |        | 14   |            | 15.8460   | AAL95222.1  tRNA pseudouridine synthase A                    |                         |    |    |   |   |   |   |
|         |                        |                      |          |          |        | 6    |            | 7.3340    |                                                              |                         |    |    |   |   |   |   |
| FN1028  | -0.275                 | 10.505               | 5.765e-2 | 3.036e-1 | 36     | 46   | 36.0000    | 52.0655   | AAL95224.1  Deoxyuridine 5'-triphosphate nucleotidohydrolase |                         |    |    |   |   |   |   |
|         |                        |                      |          |          | 26     | 26   | 33.3122    | 31.7807   |                                                              |                         |    |    |   |   |   |   |
| FN1029  | -0.888                 | 12.803               | 6.058e-4 | 1.274e-3 | 73     | 106  | 73.0000    | 119.9770  | AAL95225.1  Zinc protease                                    |                         |    |    |   |   |   |   |
|         |                        |                      |          |          | 40     | 90   | 51.2496    | 110.0102  |                                                              |                         |    |    |   |   |   |   |
| FN1030  | 1.236                  | 4.764                |          |          | 8      | 3    | 8.0000     | 3.3956    | AAL95226.1  Hypothetical membrane-spanning protein           |                         |    |    |   |   |   |   |
|         |                        |                      |          |          |        |      |            |           |                                                              |                         |    |    |   |   |   |   |
| FN1031  | -1.211                 | 5.096                |          |          |        | 6    |            | 6.7912    | AAL95227.1  Hypothetical membrane-spanning protein           |                         |    |    |   |   |   |   |
|         |                        |                      |          |          | 3      | 9    | 3.8437     | 11.0010   |                                                              |                         |    |    |   |   |   |   |

Show detected proteins only  
 Show all proteins  
 Filter by category:

Proteins found: 1297

Enter (or paste) list of ORFs

Find ORFs

Test Cutoff

q-Value p-Value

.005

| Signif      | Direction | Applies To |
|-------------|-----------|------------|
| red         | yes       | +          |
| yellow      | no        | n/a        |
| green       | yes       | -          |
| pink        | yes       | +          |
| light green | yes       | -          |

ratios, bars  
bars  
ratios, bars  
p-, q-Values

Dot Plots Dot Plots

Fn Summary Table FnPg vs Fn FnSg vs Fn FnPgSg vs Fn FnPgSg vs FnPg FnSg vs FnPg FnPgSg vs FnSg Fn Coverage

| Protein | FnPgSg vs Fn           |                      |          |          | Raw    |     | Normalized |          | Description                                         | Log <sub>2</sub> Ratios |    |    |   |   |   |   |
|---------|------------------------|----------------------|----------|----------|--------|-----|------------|----------|-----------------------------------------------------|-------------------------|----|----|---|---|---|---|
|         | Log <sub>2</sub> Ratio | Log <sub>2</sub> Sum | q-Value  | p-Value  | FnPgSg | Fn  | FnPgSg     | Fn       |                                                     | -6                      | -4 | -2 | 0 | 2 | 4 | 6 |
| FN1033  | -1.756                 | 10.912               | 9.872e-4 | 2.351e-3 | 26     | 81  | 26.0000    | 91.6806  | AAL95229.1  Methyltransferase                       |                         |    |    |   |   |   |   |
|         |                        |                      |          |          | 17     | 57  | 21.7811    | 69.6731  |                                                     |                         |    |    |   |   |   |   |
| FN1034  |                        |                      |          |          | 4      |     | 4.0000     |          | AAL95230.1  Transcriptional regulator, TetR family  |                         |    |    |   |   |   |   |
|         |                        |                      |          |          |        |     |            |          |                                                     |                         |    |    |   |   |   |   |
| FN1037  |                        |                      |          |          | 3      |     | 3.0000     |          | AAL95233.1  Hypothetical cytosolic protein          |                         |    |    |   |   |   |   |
|         |                        |                      |          |          |        |     |            |          |                                                     |                         |    |    |   |   |   |   |
| FN1041  |                        |                      |          |          | 8      |     | 8.0000     |          | AAL95237.1  Acetyltransferase                       |                         |    |    |   |   |   |   |
|         |                        |                      |          |          | 7      |     | 8.9687     |          |                                                     |                         |    |    |   |   |   |   |
| FN1042  | -2.360                 | 11.283               | 1.743e-4 | 2.372e-4 | 21     | 107 | 21.0000    | 121.1089 | AAL95238.1  S1 RNA binding domain                   |                         |    |    |   |   |   |   |
|         |                        |                      |          |          | 18     | 86  | 23.0623    | 105.1209 |                                                     |                         |    |    |   |   |   |   |
| FN1045  |                        |                      |          |          |        | 7   |            | 7.9230   | AAL95241.1  Hypothetical protein                    |                         |    |    |   |   |   |   |
|         |                        |                      |          |          |        | 4   |            | 4.8893   |                                                     |                         |    |    |   |   |   |   |
| FN1048  |                        |                      |          |          | 3      |     | 3.0000     |          | AAL95244.1  Hypothetical membrane-spanning protein  |                         |    |    |   |   |   |   |
|         |                        |                      |          |          |        |     |            |          |                                                     |                         |    |    |   |   |   |   |
| FN1050  |                        |                      |          |          |        | 7   |            | 7.9230   | AAL95246.1  Lactoylglutathione lyase                |                         |    |    |   |   |   |   |
|         |                        |                      |          |          |        |     |            |          |                                                     |                         |    |    |   |   |   |   |
| FN1055  | -0.421                 | 10.944               | 7.886e-3 | 3.12e-2  | 37     | 40  | 37.0000    | 45.2744  | AAL95251.1  Cysteine synthase                       |                         |    |    |   |   |   |   |
|         |                        |                      |          |          | 31     | 47  | 39.7184    | 57.4498  |                                                     |                         |    |    |   |   |   |   |
| FN1057  |                        |                      |          |          |        | 8   |            | 9.0549   | AAL95253.1  Diamine acetyltransferase               |                         |    |    |   |   |   |   |
|         |                        |                      |          |          |        | 6   |            | 7.3340   |                                                     |                         |    |    |   |   |   |   |
| FN1060  | -0.041                 | 9.198                | 1.263e-1 | 7.317e-1 | 26     | 24  | 26.0000    | 27.1646  | AAL95256.1  hypothetical cytosolic protein          |                         |    |    |   |   |   |   |
|         |                        |                      |          |          | 17     | 18  | 21.7811    | 22.0020  |                                                     |                         |    |    |   |   |   |   |
| FN1062  | 0.379                  | 13.417               | 1.426e-3 | 3.923e-3 | 113    | 80  | 113.0000   | 90.5487  | AAL95258.1  Hydrolase                               |                         |    |    |   |   |   |   |
|         |                        |                      |          |          | 98     | 76  | 125.5615   | 92.8975  |                                                     |                         |    |    |   |   |   |   |
| FN1063  | -1.399                 | 5.399                |          |          | 4      | 10  | 4.0000     | 11.3186  | AAL95259.1  N-acyl-L-amino acid amidohydrolase      |                         |    |    |   |   |   |   |
|         |                        |                      |          |          |        | 8   |            | 9.7787   |                                                     |                         |    |    |   |   |   |   |
| FN1066  | 0.018                  | 6.103                | 1.388e-1 | 8.16e-1  | 9      | 7   | 9.0000     | 7.9230   | AAL95262.1  Exodeoxyribonuclease VII large subunit  |                         |    |    |   |   |   |   |
|         |                        |                      |          |          | 6      | 7   | 7.6874     | 8.5563   |                                                     |                         |    |    |   |   |   |   |
| FN1067  | -1.263                 | 11.258               | 4.003e-4 | 7.519e-4 | 28     | 75  | 28.0000    | 84.8894  | AAL95263.1  Tetratricopeptide repeat family protein |                         |    |    |   |   |   |   |
|         |                        |                      |          |          | 28     | 56  | 35.8747    | 68.4508  |                                                     |                         |    |    |   |   |   |   |
| FN1069  | -0.952                 | 11.939               | 2.083e-4 | 3.089e-4 | 44     | 73  | 44.0000    | 82.6257  | AAL95265.1  DNA topoisomerase I                     |                         |    |    |   |   |   |   |
|         |                        |                      |          |          | 36     | 75  | 46.1246    | 91.6752  |                                                     |                         |    |    |   |   |   |   |

Show detected proteins only  
 Show all proteins  
 Filter by category:

Proteins found: 1297

Enter (or paste) list of ORFs

Find ORFs

Test Cutoff

q-Value p-Value

.005

| Signif | Direction | Applies To   |
|--------|-----------|--------------|
| yes    | +         | ratios, bars |
| no     | n/a       | bars         |
| yes    | -         | ratios, bars |
| yes    | +         | p-, q-Values |
| yes    | -         | p-, q-Values |

Dot Plots Dot Plots



Fn Summary Table FnPg vs Fn FnSg vs Fn FnPgSg vs Fn FnPgSg vs FnPg FnSg vs FnPg FnPgSg vs FnSg Fn Coverage

| Protein | FnPgSg vs Fn           |                      |          |          | Raw    |     | Normalized |          | Description                                                                       | Log <sub>2</sub> Ratios |    |    |   |   |   |   |
|---------|------------------------|----------------------|----------|----------|--------|-----|------------|----------|-----------------------------------------------------------------------------------|-------------------------|----|----|---|---|---|---|
|         | Log <sub>2</sub> Ratio | Log <sub>2</sub> Sum | q-Value  | p-Value  | FnPgSg | Fn  | FnPgSg     | Fn       |                                                                                   | -6                      | -4 | -2 | 0 | 2 | 4 | 6 |
| FN1070  | -0.598                 | 8.041                | 3.333e-3 | 1.118e-2 | 11     | 18  | 11.0000    | 20.3735  | AAL95266.1  Glucose inhibited division protein A                                  |                         |    |    |   |   |   |   |
|         |                        |                      |          |          | 12     | 16  | 15.3749    | 19.5574  |                                                                                   |                         |    |    |   |   |   |   |
| FN1071  | 0.295                  | 4.875                |          |          | 6      |     | 6.0000     |          | AAL95267.1  Integrase/recombinase                                                 |                         |    |    |   |   |   |   |
|         |                        |                      |          |          |        | 4   |            | 4.8893   |                                                                                   |                         |    |    |   |   |   |   |
| FN1072  | -1.230                 | 10.601               | 5.007e-5 | 4.1e-5   | 22     | 57  | 22.0000    | 64.5160  | AAL95268.1  GTP-binding protein                                                   |                         |    |    |   |   |   |   |
|         |                        |                      |          |          | 23     | 46  | 29.4685    | 56.2274  |                                                                                   |                         |    |    |   |   |   |   |
| FN1073  | -1.682                 | 5.567                |          |          |        | 11  |            | 12.4504  | AAL95269.1  Hypothetical protein                                                  |                         |    |    |   |   |   |   |
|         |                        |                      |          |          | 3      | 10  | 3.8437     | 12.2234  |                                                                                   |                         |    |    |   |   |   |   |
| FN1074  | -0.890                 | 9.292                | 1.448e-3 | 4.01e-3  | 15     | 30  | 15.0000    | 33.9558  | AAL95270.1  Signal recognition particle receptor FtsY                             |                         |    |    |   |   |   |   |
|         |                        |                      |          |          | 17     | 28  | 21.7811    | 34.2254  |                                                                                   |                         |    |    |   |   |   |   |
| FN1077  | 2.394                  | 8.366                |          |          | 41     | 7   | 41.0000    | 7.9230   | AAL95273.1  Hypothetical protein                                                  |                         |    |    |   |   |   |   |
|         |                        |                      |          |          | 33     |     | 42.2809    |          |                                                                                   |                         |    |    |   |   |   |   |
| FN1078  | -0.160                 | 14.734               | 5.6e-2   | 2.94e-1  | 133    | 142 | 133.0000   | 160.7240 | AAL95274.1  Hypothetical exported 24-amino acid repeat protein                    |                         |    |    |   |   |   |   |
|         |                        |                      |          |          | 140    | 154 | 179.3735   | 188.2397 |                                                                                   |                         |    |    |   |   |   |   |
| FN1079  | 0.561                  | 17.838               | 1.771e-3 | 5.207e-3 | 638    | 364 | 638.0000   | 411.9967 | AAL95275.1  Neutrophil-activating protein A                                       |                         |    |    |   |   |   |   |
|         |                        |                      |          |          | 420    | 315 | 538.1206   | 385.0357 |                                                                                   |                         |    |    |   |   |   |   |
| FN1080  | -0.224                 | 5.175                | 3.174e-2 | 1.536e-1 | 6      | 5   | 6.0000     | 5.6593   | AAL95276.1  Export ABC transporter                                                |                         |    |    |   |   |   |   |
|         |                        |                      |          |          | 4      | 6   | 5.1250     | 7.3340   |                                                                                   |                         |    |    |   |   |   |   |
| FN1081  | -0.891                 | 9.327                | 1.83e-3  | 5.426e-3 | 18     | 34  | 18.0000    | 38.4832  | AAL95277.1  unknown                                                               |                         |    |    |   |   |   |   |
|         |                        |                      |          |          | 15     | 25  | 19.2186    | 30.5584  |                                                                                   |                         |    |    |   |   |   |   |
| FN1082  |                        |                      |          |          | 4      |     | 4.0000     |          | AAL95278.1  unknown                                                               |                         |    |    |   |   |   |   |
|         |                        |                      |          |          |        |     |            |          |                                                                                   |                         |    |    |   |   |   |   |
| FN1084  | -0.039                 | 13.144               | 1.443e-1 | 8.537e-1 | 75     | 97  | 75.0000    | 109.7903 | AAL95280.1  unknown                                                               |                         |    |    |   |   |   |   |
|         |                        |                      |          |          | 88     | 68  | 112.7491   | 83.1188  |                                                                                   |                         |    |    |   |   |   |   |
| FN1085  | 0.163                  | 11.123               | 7.055e-2 | 3.794e-1 | 41     | 40  | 41.0000    | 45.2744  | AAL95281.1  4-methyl-5(B-hydroxyethyl)-thiazole monophosphate biosynthesis enzyme |                         |    |    |   |   |   |   |
|         |                        |                      |          |          | 46     | 36  | 58.9370    | 44.0041  |                                                                                   |                         |    |    |   |   |   |   |
| FN1086  | 0.388                  | 6.489                | 5.178e-2 | 2.69e-1  | 14     | 6   | 14.0000    | 6.7912   | AAL95282.1  Transporter                                                           |                         |    |    |   |   |   |   |
|         |                        |                      |          |          | 6      | 8   | 7.6874     | 9.7787   |                                                                                   |                         |    |    |   |   |   |   |
| FN1088  | 0.379                  | 9.704                | 3.74e-3  | 1.283e-2 | 30     | 21  | 30.0000    | 23.7690  | AAL95284.1  NADH oxidase                                                          |                         |    |    |   |   |   |   |
|         |                        |                      |          |          | 28     | 22  | 35.8747    | 26.8914  |                                                                                   |                         |    |    |   |   |   |   |
| FN1089  | -0.071                 | 9.804                | 1.148e-1 | 6.566e-1 | 34     | 25  | 34.0000    | 28.2965  | AAL95285.1  ATP-binding protein (contains P-loop)                                 |                         |    |    |   |   |   |   |
|         |                        |                      |          |          | 19     | 27  | 24.3435    | 33.0031  |                                                                                   |                         |    |    |   |   |   |   |

Show detected proteins only  
 Show all proteins  
 Filter by category:

Proteins found: 1297

Enter (or paste) list of ORFs

Find ORFs

Test Cutoff

q-Value

p-Value

.005

| Signif | Direction | Applies To   |
|--------|-----------|--------------|
| yes    | +         | ratios, bars |
| no     | n/a       | bars         |
| yes    | -         | ratios, bars |
| yes    | +         | p-, q-Values |
| yes    | -         | p-, q-Values |

Dot Plots Dot Plots

Fn Summary Table FnPg vs Fn FnSg vs Fn FnPgSg vs Fn FnPgSg vs FnPg FnSg vs FnPg FnPgSg vs FnSg Fn Coverage

| Protein | FnPgSg vs Fn           |                      |          |          | Raw    |     | Normalized |          | Description                                           | Log <sub>2</sub> Ratios |    |    |   |   |   |   |
|---------|------------------------|----------------------|----------|----------|--------|-----|------------|----------|-------------------------------------------------------|-------------------------|----|----|---|---|---|---|
|         | Log <sub>2</sub> Ratio | Log <sub>2</sub> Sum | q-Value  | p-Value  | FnPgSg | Fn  | FnPgSg     | Fn       |                                                       | -6                      | -4 | -2 | 0 | 2 | 4 | 6 |
| FN1091  | -0.748                 | 8.207                | 3.136e-4 | 5.364e-4 | 15     | 21  | 15.0000    | 23.7690  | AAL95287.1  Sigma factor sigB regulation protein rsbU |                         |    |    |   |   |   |   |
|         |                        |                      |          |          | 9      | 17  | 11.5312    | 20.7797  |                                                       |                         |    |    |   |   |   |   |
| FN1092  | -0.497                 | 9.991                | 4.951e-2 | 2.558e-1 | 14     | 27  | 14.0000    | 30.5602  | AAL95288.1  Hypothetical protein                      |                         |    |    |   |   |   |   |
|         |                        |                      |          |          | 31     | 37  | 39.7184    | 45.2264  |                                                       |                         |    |    |   |   |   |   |
| FN1093  | -0.599                 | 12.248               | 8.443e-6 | 2.533e-6 | 57     | 75  | 57.0000    | 84.8894  | AAL95289.1  Hypothetical protein                      |                         |    |    |   |   |   |   |
|         |                        |                      |          |          | 44     | 71  | 56.3745    | 86.7858  |                                                       |                         |    |    |   |   |   |   |
| FN1096  | -0.245                 | 10.688               | 7.222e-2 | 3.895e-1 | 49     | 36  | 49.0000    | 40.7469  | AAL95292.1  Hypothetical protein                      |                         |    |    |   |   |   |   |
|         |                        |                      |          |          | 20     | 39  | 25.6248    | 47.6711  |                                                       |                         |    |    |   |   |   |   |
| FN1097  | -2.213                 | 10.020               | 2.738e-3 | 8.822e-3 | 12     | 47  | 12.0000    | 53.1974  | AAL95293.1  Hypothetical protein                      |                         |    |    |   |   |   |   |
|         |                        |                      |          |          | 14     | 70  | 17.9374    | 85.5635  |                                                       |                         |    |    |   |   |   |   |
| FN1101  | -0.916                 | 4.086                |          |          | 3      | 5   | 3.0000     | 5.6593   | AAL95297.1  ATPase                                    |                         |    |    |   |   |   |   |
|         |                        |                      |          |          |        |     |            |          |                                                       |                         |    |    |   |   |   |   |
| FN1102  |                        |                      |          |          |        | 28  |            | 31.6921  | AAL95298.1  tRNA 2'phosphotransferase                 |                         |    |    |   |   |   |   |
|         |                        |                      |          |          |        | 32  |            | 39.1147  |                                                       |                         |    |    |   |   |   |   |
| FN1103  | -2.179                 | 11.110               | 1.714e-5 | 7.156e-6 | 16     | 85  | 16.0000    | 96.2080  | AAL95299.1  Excinuclease ABC subunit A                |                         |    |    |   |   |   |   |
|         |                        |                      |          |          | 22     | 85  | 28.1873    | 103.8985 |                                                       |                         |    |    |   |   |   |   |
| FN1104  |                        |                      |          |          | 5      |     | 5.0000     |          | AAL95300.1  Holliday junction DNA helicase ruvA       |                         |    |    |   |   |   |   |
|         |                        |                      |          |          |        |     |            |          |                                                       |                         |    |    |   |   |   |   |
| FN1105  | -0.344                 | 12.794               | 7.461e-3 | 2.925e-2 | 74     | 76  | 74.0000    | 86.0213  | AAL95301.1  Hypothetical protein                      |                         |    |    |   |   |   |   |
|         |                        |                      |          |          | 59     | 85  | 75.5931    | 103.8985 |                                                       |                         |    |    |   |   |   |   |
| FN1106  | -1.220                 | 11.864               | 3.345e-4 | 5.862e-4 | 39     | 88  | 39.0000    | 99.6036  | AAL95302.1  L-serine dehydratase                      |                         |    |    |   |   |   |   |
|         |                        |                      |          |          | 32     | 71  | 40.9997    | 86.7858  |                                                       |                         |    |    |   |   |   |   |
| FN1111  | -0.122                 | 6.457                |          |          | 9      |     | 9.0000     |          | AAL95307.1  Dipeptide-binding protein                 |                         |    |    |   |   |   |   |
|         |                        |                      |          |          | 7      | 8   | 8.9687     | 9.7787   |                                                       |                         |    |    |   |   |   |   |
| FN1117  | 0.673                  | 12.012               | 2.563e-3 | 8.139e-3 | 79     | 37  | 79.0000    | 41.8788  | AAL95313.1  LSU ribosomal protein L21P                |                         |    |    |   |   |   |   |
|         |                        |                      |          |          | 65     | 49  | 83.2806    | 59.8944  |                                                       |                         |    |    |   |   |   |   |
| FN1119  | 0.519                  | 14.977               | 6.182e-4 | 1.308e-3 | 230    | 142 | 230.0000   | 160.7240 | AAL95315.1  LSU ribosomal protein L27P                |                         |    |    |   |   |   |   |
|         |                        |                      |          |          | 156    | 114 | 199.8734   | 139.3462 |                                                       |                         |    |    |   |   |   |   |
| FN1120  | -0.154                 | 14.141               | 5.19e-2  | 2.697e-1 | 128    | 109 | 128.0000   | 123.3726 | AAL95316.1  Phosphoenolpyruvate carboxykinase (ATP)   |                         |    |    |   |   |   |   |
|         |                        |                      |          |          | 99     | 131 | 126.8427   | 160.1260 |                                                       |                         |    |    |   |   |   |   |
| FN1121  | 0.155                  | 12.426               | 3.124e-2 | 1.507e-1 | 72     | 67  | 72.0000    | 75.8345  | AAL95317.1  hypothetical cytosolic protein            |                         |    |    |   |   |   |   |
|         |                        |                      |          |          | 66     | 53  | 84.5618    | 64.7838  |                                                       |                         |    |    |   |   |   |   |

Show detected proteins only  
 Show all proteins  
 Filter by category:

Proteins found: 1297

Test Cutoff

| Signif | Direction | Applies To   |
|--------|-----------|--------------|
| yes    | +         | ratios, bars |
| no     | n/a       | bars         |
| yes    | -         | ratios, bars |
| yes    | +         | p-, q-Values |
| yes    | -         |              |

Fn Summary Table FnPg vs Fn FnSg vs Fn FnPgSg vs Fn FnPgSg vs FnPg FnSg vs FnPg FnPgSg vs FnSg Fn Coverage

| Protein | FnPgSg vs Fn           |                      |          |          | Raw    |     | Normalized |          | Description                                                     | Log <sub>2</sub> Ratios |    |    |   |   |   |   |
|---------|------------------------|----------------------|----------|----------|--------|-----|------------|----------|-----------------------------------------------------------------|-------------------------|----|----|---|---|---|---|
|         | Log <sub>2</sub> Ratio | Log <sub>2</sub> Sum | q-Value  | p-Value  | FnPgSg | Fn  | FnPgSg     | Fn       |                                                                 | -6                      | -4 | -2 | 0 | 2 | 4 | 6 |
| FN1122  | -0.692                 | 14.885               | 3.039e-3 | 1.003e-2 | 143    | 219 | 143.0000   | 247.8771 | AAL95318.1  Long-chain-fatty-acid--CoA ligase                   |                         |    |    |   |   |   |   |
|         |                        |                      |          |          | 102    | 159 | 130.6864   | 194.3513 |                                                                 |                         |    |    |   |   |   |   |
| FN1123  | 0.332                  | 9.587                | 7.741e-2 | 4.211e-1 | 43     | 21  | 43.0000    | 23.7690  | AAL95319.1  Thioredoxin-like protein                            |                         |    |    |   |   |   |   |
|         |                        |                      |          |          | 15     | 21  | 19.2186    | 25.6690  |                                                                 |                         |    |    |   |   |   |   |
| FN1124  | -0.247                 | 17.032               | 5.061e-3 | 1.852e-2 | 312    | 356 | 312.0000   | 402.9418 | AAL95320.1  Outer membrane porin F                              |                         |    |    |   |   |   |   |
|         |                        |                      |          |          | 281    | 323 | 360.0283   | 394.8144 |                                                                 |                         |    |    |   |   |   |   |
| FN1125  | 0.472                  | 10.810               | 1.275e-3 | 3.34e-3  | 46     | 29  | 46.0000    | 32.8239  | AAL95321.1  LemA protein                                        |                         |    |    |   |   |   |   |
|         |                        |                      |          |          | 42     | 32  | 53.8121    | 39.1147  |                                                                 |                         |    |    |   |   |   |   |
| FN1127  | -0.015                 | 10.554               | 1.511e-1 | 9.013e-1 | 40     | 30  | 40.0000    | 33.9558  | AAL95323.1  Hypothetical membrane-spanning protein              |                         |    |    |   |   |   |   |
|         |                        |                      |          |          | 29     | 36  | 37.1559    | 44.0041  |                                                                 |                         |    |    |   |   |   |   |
| FN1128  | -0.418                 | 15.119               | 4.669e-4 | 9.141e-4 | 156    | 193 | 156.0000   | 218.4488 | AAL95324.1  Acylamino-acid-releasing enzyme                     |                         |    |    |   |   |   |   |
|         |                        |                      |          |          | 133    | 178 | 170.4048   | 217.5757 |                                                                 |                         |    |    |   |   |   |   |
| FN1129  | -1.290                 | 7.362                | 1.808e-4 | 2.501e-4 | 10     | 16  | 10.0000    | 18.1097  | AAL95325.1  Chromosome partition protein smc                    |                         |    |    |   |   |   |   |
|         |                        |                      |          |          | 5      | 18  | 6.4062     | 22.0020  |                                                                 |                         |    |    |   |   |   |   |
| FN1130  | -0.816                 | 6.816                |          |          | 8      | 13  | 8.0000     | 14.7142  | AAL95326.1  Tetraacyldisaccharide 4'-kinase                     |                         |    |    |   |   |   |   |
|         |                        |                      |          |          |        | 11  |            | 13.4457  |                                                                 |                         |    |    |   |   |   |   |
| FN1131  | -1.512                 | 4.682                |          |          | 3      |     | 3.0000     |          | AAL95327.1  Hypothetical protein                                |                         |    |    |   |   |   |   |
|         |                        |                      |          |          |        | 7   |            | 8.5563   |                                                                 |                         |    |    |   |   |   |   |
| FN1133  | 0.110                  | 9.557                | 7.076e-2 | 3.807e-1 | 25     | 24  | 25.0000    | 27.1646  | AAL95329.1  N-acetylglucosamine-6-phosphate deacetylase         |                         |    |    |   |   |   |   |
|         |                        |                      |          |          | 25     | 21  | 32.0310    | 25.6690  |                                                                 |                         |    |    |   |   |   |   |
| FN1134  | -0.962                 | 9.877                | 3.515e-4 | 6.284e-4 | 26     | 40  | 26.0000    | 45.2744  | AAL95330.1  Hypothetical cytosolic protein                      |                         |    |    |   |   |   |   |
|         |                        |                      |          |          | 14     | 33  | 17.9374    | 40.3371  |                                                                 |                         |    |    |   |   |   |   |
| FN1135  | -0.346                 | 14.305               | 2.104e-4 | 3.139e-4 | 123    | 142 | 123.0000   | 160.7240 | AAL95331.1  Phosphonates-binding protein                        |                         |    |    |   |   |   |   |
|         |                        |                      |          |          | 101    | 131 | 129.4052   | 160.1260 |                                                                 |                         |    |    |   |   |   |   |
| FN1136  | 0.355                  | 6.632                | 3.615e-5 | 2.421e-5 | 11     | 8   | 11.0000    | 9.0549   | AAL95332.1  Phosphonates transport ATP-binding protein phnC     |                         |    |    |   |   |   |   |
|         |                        |                      |          |          | 9      | 7   | 11.5312    | 8.5563   |                                                                 |                         |    |    |   |   |   |   |
| FN1137  |                        |                      |          |          | 3      |     |            |          | AAL95333.1  Phosphonates transport system permease protein phnE |                         |    |    |   |   |   |   |
|         |                        |                      |          |          |        |     | 3.8437     |          |                                                                 |                         |    |    |   |   |   |   |
| FN1138  | 0.417                  | 19.352               | 2.834e-2 | 1.343e-1 | 1147   | 644 | 1147.0000  | 728.9172 | AAL95334.1  Hypothetical cytosolic protein                      |                         |    |    |   |   |   |   |
|         |                        |                      |          |          | 580    | 562 | 743.1189   | 686.9526 |                                                                 |                         |    |    |   |   |   |   |
| FN1139  | -2.980                 | 9.223                | 1e-6     | 1.261e-7 | 11     | 63  | 11.0000    | 71.3071  | AAL95335.1  Activator of (R)-2-hydroxyglutaryl-CoA dehydratase  |                         |    |    |   |   |   |   |
|         |                        |                      |          |          | 5      | 54  | 6.4062     | 66.0061  |                                                                 |                         |    |    |   |   |   |   |

Show detected proteins only  
 Show all proteins  
 Filter by category:

Proteins found: 1297

Enter (or paste) list of ORFs

Find ORFs

Test Cutoff

q-Value p-Value

.005

| Signif      | Direction | Applies To |
|-------------|-----------|------------|
| red         | yes       | +          |
| yellow      | no        | n/a        |
| green       | yes       | -          |
| pink        | yes       | +          |
| light green | yes       | -          |

ratios, bars  
bars  
ratios, bars  
p-, q-Values

Dot Plots Dot Plots

Fn Summary Table FnPg vs Fn FnSg vs Fn FnPgSg vs Fn FnPgSg vs FnPg FnSg vs FnPg FnPgSg vs FnSg Fn Coverage

| Protein | FnPgSg vs Fn           |                      |          |          | Raw    |     | Normalized |          | Description                                                    | Log <sub>2</sub> Ratios |    |    |   |   |   |   |
|---------|------------------------|----------------------|----------|----------|--------|-----|------------|----------|----------------------------------------------------------------|-------------------------|----|----|---|---|---|---|
|         | Log <sub>2</sub> Ratio | Log <sub>2</sub> Sum | q-Value  | p-Value  | FnPgSg | Fn  | FnPgSg     | Fn       |                                                                | -6                      | -4 | -2 | 0 | 2 | 4 | 6 |
| FN1140  |                        |                      |          |          |        | 7   |            | 7.9230   | AAL95336.1  hypothetical protein                               |                         |    |    |   |   |   |   |
|         |                        |                      |          |          |        | 8   |            | 9.7787   |                                                                |                         |    |    |   |   |   |   |
| FN1142  | -2.110                 | 5.280                |          |          | 3      | 11  | 3.0000     | 12.4504  | AAL95338.1  Oxygen-independent coproporphyrinogen III oxidase  |                         |    |    |   |   |   |   |
|         |                        |                      |          |          |        | 11  |            | 13.4457  |                                                                |                         |    |    |   |   |   |   |
| FN1143  | 0.012                  | 12.924               | 1.573e-1 | 9.45e-1  | 104    | 72  | 104.0000   | 81.4938  | AAL95339.1  Glucosamine-6-phosphate isomerase                  |                         |    |    |   |   |   |   |
|         |                        |                      |          |          | 57     | 77  | 73.0306    | 94.1198  |                                                                |                         |    |    |   |   |   |   |
| FN1144  | -0.252                 | 15.409               | 1.186e-3 | 3.015e-3 | 199    | 210 | 199.0000   | 237.6904 | AAL95340.1  Hypothetical Exported Protein                      |                         |    |    |   |   |   |   |
|         |                        |                      |          |          | 143    | 178 | 183.2172   | 217.5757 |                                                                |                         |    |    |   |   |   |   |
| FN1145  | -0.030                 | 8.799                | 1.475e-1 | 8.757e-1 | 20     | 15  | 20.0000    | 16.9779  | AAL95341.1  Oligoendopeptidase F                               |                         |    |    |   |   |   |   |
|         |                        |                      |          |          | 17     | 21  | 21.7811    | 25.6690  |                                                                |                         |    |    |   |   |   |   |
| FN1146  | -0.320                 | 9.059                | 1.974e-2 | 8.9e-2   | 17     | 24  | 17.0000    | 27.1646  | AAL95342.1  Hypothetical exported 24-amino acid repeat protein |                         |    |    |   |   |   |   |
|         |                        |                      |          |          | 19     | 20  | 24.3435    | 24.4467  |                                                                |                         |    |    |   |   |   |   |
| FN1147  | 1.021                  | 9.901                | 9.502e-3 | 3.89e-2  | 33     | 20  | 33.0000    | 22.6372  | AAL95343.1  Hypothetical protein                               |                         |    |    |   |   |   |   |
|         |                        |                      |          |          | 43     | 17  | 55.0933    | 20.7797  |                                                                |                         |    |    |   |   |   |   |
| FN1148  | -0.087                 | 10.711               | 5.158e-2 | 2.678e-1 | 41     | 40  | 41.0000    | 45.2744  | AAL95344.1  Serine/threonine sodium symporter                  |                         |    |    |   |   |   |   |
|         |                        |                      |          |          | 30     | 32  | 38.4372    | 39.1147  |                                                                |                         |    |    |   |   |   |   |
| FN1149  | -1.099                 | 6.764                | 5.055e-3 | 1.849e-2 | 4      | 14  | 4.0000     | 15.8460  | AAL95345.1  ATP-dependent nuclease subunit A                   |                         |    |    |   |   |   |   |
|         |                        |                      |          |          | 8      | 12  | 10.2499    | 14.6680  |                                                                |                         |    |    |   |   |   |   |
| FN1150  | -0.739                 | 5.455                |          |          |        |     |            |          | AAL95346.1  unknown                                            |                         |    |    |   |   |   |   |
|         |                        |                      |          |          | 4      | 7   | 5.1250     | 8.5563   |                                                                |                         |    |    |   |   |   |   |
| FN1152  | -0.040                 | 14.224               | 9.982e-2 | 5.613e-1 | 146    | 128 | 146.0000   | 144.8779 | AAL95348.1  Aspartate aminotransferase                         |                         |    |    |   |   |   |   |
|         |                        |                      |          |          | 99     | 111 | 126.8427   | 135.6792 |                                                                |                         |    |    |   |   |   |   |
| FN1153  | 0.032                  | 10.393               | 1.326e-1 | 7.737e-1 | 37     | 36  | 37.0000    | 40.7469  | AAL95349.1  Hypothetical protein                               |                         |    |    |   |   |   |   |
|         |                        |                      |          |          | 29     | 26  | 37.1559    | 31.7807  |                                                                |                         |    |    |   |   |   |   |
| FN1154  |                        |                      |          |          |        |     |            |          | AAL95350.1  Ribonuclease BN                                    |                         |    |    |   |   |   |   |
|         |                        |                      |          |          |        | 7   |            | 8.5563   |                                                                |                         |    |    |   |   |   |   |
| FN1155  |                        |                      |          |          |        |     |            |          | AAL95351.1  Cell division protein ftsI                         |                         |    |    |   |   |   |   |
|         |                        |                      |          |          |        | 7   |            | 7.9230   |                                                                |                         |    |    |   |   |   |   |
| FN1157  | 0.980                  | 7.065                | 1.114e-2 | 4.655e-2 | 12     | 7   | 12.0000    | 7.9230   | AAL95353.1  Polypeptide deformylase                            |                         |    |    |   |   |   |   |
|         |                        |                      |          |          | 16     | 7   | 20.4998    | 8.5563   |                                                                |                         |    |    |   |   |   |   |
| FN1159  | -0.035                 | 12.863               | 1.354e-1 | 7.929e-1 | 77     | 68  | 77.0000    | 76.9664  | AAL95355.1  Fructose-1,6-bisphosphatase                        |                         |    |    |   |   |   |   |
|         |                        |                      |          |          | 73     | 80  | 93.5305    | 97.7868  |                                                                |                         |    |    |   |   |   |   |

Show detected proteins only  
 Show all proteins  
 Filter by category:

Proteins found: 1297

Test Cutoff

| Signif | Direction | Applies To   |
|--------|-----------|--------------|
| yes    | +         | ratios, bars |
| no     | n/a       | bars         |
| yes    | -         | ratios, bars |
| yes    | +         | p-, q-Values |
| yes    | -         |              |



Fn Summary Table FnPg vs Fn FnSg vs Fn FnPgSg vs Fn FnPgSg vs FnPg FnSg vs FnPg FnPgSg vs FnSg Fn Coverage

| Protein | FnPgSg vs Fn           |                      |          |          | Raw    |     | Normalized |          | Description                                      | Log <sub>2</sub> Ratios |    |    |   |   |   |   |
|---------|------------------------|----------------------|----------|----------|--------|-----|------------|----------|--------------------------------------------------|-------------------------|----|----|---|---|---|---|
|         | Log <sub>2</sub> Ratio | Log <sub>2</sub> Sum | q-Value  | p-Value  | FnPgSg | Fn  | FnPgSg     | Fn       |                                                  | -6                      | -4 | -2 | 0 | 2 | 4 | 6 |
| FN1183  | -0.372                 | 5.250                | 3.84e-2  | 1.919e-1 | 7      | 7   | 7.0000     | 7.9230   | AAL95379.1  Hypothetical cytosolic protein       |                         |    |    |   |   |   |   |
|         |                        |                      |          |          | 3      | 5   | 3.8437     | 6.1117   |                                                  |                         |    |    |   |   |   |   |
| FN1185  | -0.022                 | 9.796                | 1.28e-1  | 7.429e-1 | 31     | 25  | 31.0000    | 28.2965  | AAL95381.1  SIR2 family protein                  |                         |    |    |   |   |   |   |
|         |                        |                      |          |          | 22     | 26  | 28.1873    | 31.7807  |                                                  |                         |    |    |   |   |   |   |
| FN1186  | 0.571                  | 8.672                | 1.738e-2 | 7.7e-2   | 30     | 12  | 30.0000    | 13.5823  | AAL95382.1  Amidohydrolase                       |                         |    |    |   |   |   |   |
|         |                        |                      |          |          | 15     | 16  | 19.2186    | 19.5574  |                                                  |                         |    |    |   |   |   |   |
| FN1187  |                        |                      |          |          | 38     |     | 38.0000    |          | AAL95383.1  Amino acid-binding protein           |                         |    |    |   |   |   |   |
|         |                        |                      |          |          | 24     |     | 30.7497    |          |                                                  |                         |    |    |   |   |   |   |
| FN1188  | -0.774                 | 11.803               | 1.582e-3 | 4.52e-3  | 53     | 69  | 53.0000    | 78.0983  | AAL95384.1  Hypothetical protein                 |                         |    |    |   |   |   |   |
|         |                        |                      |          |          | 30     | 64  | 38.4372    | 78.2295  |                                                  |                         |    |    |   |   |   |   |
| FN1189  | -0.844                 | 11.917               | 9.974e-5 | 1.086e-4 | 48     | 77  | 48.0000    | 87.1531  | AAL95385.1  Hypothetical protein                 |                         |    |    |   |   |   |   |
|         |                        |                      |          |          | 35     | 65  | 44.8434    | 79.4518  |                                                  |                         |    |    |   |   |   |   |
| FN1190  | -0.773                 | 13.486               | 2.781e-5 | 1.491e-5 | 87     | 121 | 87.0000    | 136.9549 | AAL95386.1  Probable cadmium-transporting ATPase |                         |    |    |   |   |   |   |
|         |                        |                      |          |          | 60     | 117 | 76.8744    | 143.0133 |                                                  |                         |    |    |   |   |   |   |
| FN1191  | -1.310                 | 9.382                | 1.205e-4 | 1.418e-4 | 20     | 33  | 20.0000    | 37.3513  | AAL95387.1  unknown                              |                         |    |    |   |   |   |   |
|         |                        |                      |          |          | 10     | 36  | 12.8124    | 44.0041  |                                                  |                         |    |    |   |   |   |   |
| FN1192  | 0.899                  | 17.594               | 2.076e-4 | 3.074e-4 | 642    | 298 | 642.0000   | 337.2940 | AAL95388.1  unknown                              |                         |    |    |   |   |   |   |
|         |                        |                      |          |          | 447    | 257 | 572.7140   | 314.1402 |                                                  |                         |    |    |   |   |   |   |
| FN1198  | -0.032                 | 9.001                | 8.343e-2 | 4.585e-1 | 23     | 21  | 23.0000    | 23.7690  | AAL95394.1  Transporter                          |                         |    |    |   |   |   |   |
|         |                        |                      |          |          | 17     | 18  | 21.7811    | 22.0020  |                                                  |                         |    |    |   |   |   |   |
| FN1200  |                        |                      |          |          | 5      |     | 5.0000     |          | AAL95396.1  Hypothetical protein                 |                         |    |    |   |   |   |   |
|         |                        |                      |          |          | 15     |     | 19.2186    |          |                                                  |                         |    |    |   |   |   |   |
| FN1202  | 0.633                  | 6.991                |          |          | 14     | 8   | 14.0000    | 9.0549   | AAL95398.1  NH(3)-dependent NAD(+) synthetase    |                         |    |    |   |   |   |   |
|         |                        |                      |          |          | 11     |     | 14.0936    |          |                                                  |                         |    |    |   |   |   |   |
| FN1203  |                        |                      |          |          |        | 10  |            | 12.2234  | AAL95399.1  GTP-binding protein                  |                         |    |    |   |   |   |   |
|         |                        |                      |          |          |        | 6   |            | 6.7912   |                                                  |                         |    |    |   |   |   |   |
| FN1204  |                        |                      |          |          |        | 10  |            | 12.2234  | AAL95400.1  Methyltransferase                    |                         |    |    |   |   |   |   |
|         |                        |                      |          |          |        |     |            |          |                                                  |                         |    |    |   |   |   |   |
| FN1205  | -0.383                 | 12.326               | 4.428e-3 | 1.578e-2 | 55     | 69  | 55.0000    | 78.0983  | AAL95401.1  Protease                             |                         |    |    |   |   |   |   |
|         |                        |                      |          |          | 55     | 70  | 70.4682    | 85.5635  |                                                  |                         |    |    |   |   |   |   |
| FN1206  |                        |                      |          |          |        | 8   |            | 9.7787   | AAL95402.1  Hemolysin                            |                         |    |    |   |   |   |   |
|         |                        |                      |          |          |        |     |            |          |                                                  |                         |    |    |   |   |   |   |

Show detected proteins only  
 Show all proteins  
 Filter by category:

Proteins found: 1297

Enter (or paste) list of ORFs

Find ORFs

Test Cutoff

q-Value p-Value

.005

| Signif      | Direction | Applies To |
|-------------|-----------|------------|
| red         | yes       | +          |
| yellow      | no        | n/a        |
| green       | yes       | -          |
| pink        | yes       | +          |
| light green | yes       | -          |

ratios, bars  
bars  
ratios, bars  
p-, q-Values

Dot Plots Dot Plots

Fn Summary Table FnPg vs Fn FnSg vs Fn FnPgSg vs Fn FnPgSg vs FnPg FnSg vs FnPg FnPgSg vs FnSg Fn Coverage

| Protein | FnPgSg vs Fn           |                      |          |          | Raw    |     | Normalized |          | Description                                                                    | Log <sub>2</sub> Ratios |    |    |   |   |   |   |
|---------|------------------------|----------------------|----------|----------|--------|-----|------------|----------|--------------------------------------------------------------------------------|-------------------------|----|----|---|---|---|---|
|         | Log <sub>2</sub> Ratio | Log <sub>2</sub> Sum | q-Value  | p-Value  | FnPgSg | Fn  | FnPgSg     | Fn       |                                                                                | -6                      | -4 | -2 | 0 | 2 | 4 | 6 |
| FN1208  | -0.991                 | 5.635                |          |          | 5      | 10  | 5.0000     | 11.3186  | AAL95404.1  1-deoxyxylulose-5-phosphate synthase                               |                         |    |    |   |   |   |   |
|         |                        |                      |          |          |        | 7   |            | 8.5563   |                                                                                |                         |    |    |   |   |   |   |
| FN1209  | -0.479                 | 11.848               | 3.301e-2 | 1.609e-1 | 67     | 77  | 67.0000    | 87.1531  | AAL95405.1  Hypothetical RNA binding protein                                   |                         |    |    |   |   |   |   |
|         |                        |                      |          |          | 28     | 46  | 35.8747    | 56.2274  |                                                                                |                         |    |    |   |   |   |   |
| FN1210  | -1.246                 | 11.463               | 5.322e-3 | 1.97e-2  | 28     | 55  | 28.0000    | 62.2522  | AAL95406.1  Metal dependent hydrolase                                          |                         |    |    |   |   |   |   |
|         |                        |                      |          |          | 32     | 83  | 40.9997    | 101.4538 |                                                                                |                         |    |    |   |   |   |   |
| FN1211  | -0.425                 | 8.138                | 4.291e-2 | 2.179e-1 | 20     | 16  | 20.0000    | 18.1097  | AAL95407.1  Cell division protein ftsI                                         |                         |    |    |   |   |   |   |
|         |                        |                      |          |          | 7      | 17  | 8.9687     | 20.7797  |                                                                                |                         |    |    |   |   |   |   |
| FN1213  | -0.785                 | 11.575               | 2.858e-4 | 4.737e-4 | 47     | 59  | 47.0000    | 66.7797  | AAL95409.1  Hypothetical protein                                               |                         |    |    |   |   |   |   |
|         |                        |                      |          |          | 29     | 64  | 37.1559    | 78.2295  |                                                                                |                         |    |    |   |   |   |   |
| FN1214  |                        |                      |          |          | 6      |     | 6.0000     |          | AAL95410.1  Fe-S oxidoreductase                                                |                         |    |    |   |   |   |   |
|         |                        |                      |          |          | 5      |     | 6.4062     |          |                                                                                |                         |    |    |   |   |   |   |
| FN1216  | -2.043                 | 7.499                | 2.413e-3 | 7.568e-3 | 3      | 18  | 3.0000     | 20.3735  | AAL95412.1  RRF2 family protein                                                |                         |    |    |   |   |   |   |
|         |                        |                      |          |          | 8      | 28  | 10.2499    | 34.2254  |                                                                                |                         |    |    |   |   |   |   |
| FN1217  | -2.308                 | 6.597                | 1.333e-3 | 3.563e-3 | 5      | 16  | 5.0000     | 18.1097  | AAL95413.1  Holliday junction DNA helicase ruvB                                |                         |    |    |   |   |   |   |
|         |                        |                      |          |          | 3      | 21  | 3.8437     | 25.6690  |                                                                                |                         |    |    |   |   |   |   |
| FN1219  | 0.422                  | 7.821                | 3.929e-2 | 1.971e-1 | 22     | 10  | 22.0000    | 11.3186  | AAL95415.1  Hypothetical protein                                               |                         |    |    |   |   |   |   |
|         |                        |                      |          |          | 10     | 12  | 12.8124    | 14.6680  |                                                                                |                         |    |    |   |   |   |   |
| FN1220  | 0.018                  | 15.272               | 1.344e-1 | 7.861e-1 | 212    | 183 | 212.0000   | 207.1302 | AAL95416.1  Cysteine synthase                                                  |                         |    |    |   |   |   |   |
|         |                        |                      |          |          | 147    | 154 | 188.3422   | 188.2397 |                                                                                |                         |    |    |   |   |   |   |
| FN1221  | 0.092                  | 8.185                | 8.491e-2 | 4.678e-1 | 16     | 13  | 16.0000    | 14.7142  | AAL95417.1  Hypothetical protein                                               |                         |    |    |   |   |   |   |
|         |                        |                      |          |          | 15     | 15  | 19.2186    | 18.3350  |                                                                                |                         |    |    |   |   |   |   |
| FN1222  | -1.412                 | 8.774                | 5.603e-4 | 1.153e-3 | 9      | 29  | 9.0000     | 32.8239  | AAL95418.1  Hypothetical protein                                               |                         |    |    |   |   |   |   |
|         |                        |                      |          |          | 13     | 29  | 16.6561    | 35.4477  |                                                                                |                         |    |    |   |   |   |   |
| FN1223  | 0.552                  | 12.301               | 1.365e-4 | 1.694e-4 | 90     | 54  | 90.0000    | 61.1204  | AAL95419.1  Oxygen-insensitive NAD(P)H nitroreductase                          |                         |    |    |   |   |   |   |
|         |                        |                      |          |          | 64     | 46  | 81.9993    | 56.2274  |                                                                                |                         |    |    |   |   |   |   |
| FN1224  | -0.646                 | 13.620               | 8.024e-4 | 1.807e-3 | 100    | 113 | 100.0000   | 127.9001 | AAL95420.1  2-dehydro-3-deoxyphosphooctonate aldolase                          |                         |    |    |   |   |   |   |
|         |                        |                      |          |          | 62     | 125 | 79.4368    | 152.7919 |                                                                                |                         |    |    |   |   |   |   |
| FN1225  | 0.346                  | 13.875               | 9.908e-3 | 4.08e-2  | 147    | 82  | 147.0000   | 92.8124  | AAL95421.1  UDP-N-acetylmuramoyl-L-alanyl-D-glutamate--meso-lanthionine ligase |                         |    |    |   |   |   |   |
|         |                        |                      |          |          | 101    | 102 | 129.4052   | 124.6782 |                                                                                |                         |    |    |   |   |   |   |
| FN1226  | -0.774                 | 13.590               | 2.599e-7 | 2.069e-8 | 84     | 127 | 84.0000    | 143.7461 | AAL95422.1  Uracil-DNA glycosylase                                             |                         |    |    |   |   |   |   |
|         |                        |                      |          |          | 67     | 120 | 85.8430    | 146.6803 |                                                                                |                         |    |    |   |   |   |   |

Show detected proteins only  
 Show all proteins  
 Filter by category:

Proteins found: 1297

Enter (or paste) list of ORFs

Find ORFs

Test Cutoff

q-Value

p-Value

.005

| Signif | Direction | Applies To   |
|--------|-----------|--------------|
| yes    | +         | ratios, bars |
| no     | n/a       | bars         |
| yes    | -         | ratios, bars |
| yes    | +         | p-, q-Values |
| yes    | -         | p-, q-Values |

Dot Plots Dot Plots

Fn Summary Table FnPg vs Fn FnSg vs Fn FnPgSg vs Fn FnPgSg vs FnPg FnSg vs FnPg FnPgSg vs FnSg Fn Coverage

| Protein | FnPgSg vs Fn           |                      |          |          | Raw    |     | Normalized |          | Description                                                   | Log <sub>2</sub> Ratios |    |    |   |   |   |   |
|---------|------------------------|----------------------|----------|----------|--------|-----|------------|----------|---------------------------------------------------------------|-------------------------|----|----|---|---|---|---|
|         | Log <sub>2</sub> Ratio | Log <sub>2</sub> Sum | q-Value  | p-Value  | FnPgSg | Fn  | FnPgSg     | Fn       |                                                               | -6                      | -4 | -2 | 0 | 2 | 4 | 6 |
| FN1229  |                        |                      |          |          |        | 5   |            | 5.6593   | AAL95425.1  Hypothetical protein                              |                         |    |    |   |   |   |   |
|         |                        |                      |          |          |        | 7   |            | 8.5563   |                                                               |                         |    |    |   |   |   |   |
| FN1230  | 0.003                  | 11.544               | 1.62e-1  | 9.785e-1 | 62     | 50  | 62.0000    | 56.5929  | AAL95426.1  Hypothetical cytosolic protein                    |                         |    |    |   |   |   |   |
|         |                        |                      |          |          | 37     | 43  | 47.4059    | 52.5604  |                                                               |                         |    |    |   |   |   |   |
| FN1231  | 0.337                  | 18.219               | 1.457e-3 | 4.047e-3 | 592    | 431 | 592.0000   | 487.8312 | AAL95427.1  Inosine-5'-monophosphate dehydrogenase            |                         |    |    |   |   |   |   |
|         |                        |                      |          |          | 507    | 405 | 649.5884   | 495.0459 |                                                               |                         |    |    |   |   |   |   |
| FN1233  |                        |                      |          |          |        | 3   |            | 3.3956   | AAL95429.1  Putative NAD(P)H oxidoreductase                   |                         |    |    |   |   |   |   |
|         |                        |                      |          |          |        | 4   |            | 4.8893   |                                                               |                         |    |    |   |   |   |   |
| FN1234  | -1.190                 | 6.887                | 2.012e-5 | 9.116e-6 | 8      | 15  | 8.0000     | 16.9779  | AAL95430.1  Hypothetical protein                              |                         |    |    |   |   |   |   |
|         |                        |                      |          |          | 5      | 13  | 6.4062     | 15.8904  |                                                               |                         |    |    |   |   |   |   |
| FN1235  | 0.553                  | 6.525                |          |          | 13     | 7   | 13.0000    | 7.9230   | AAL95431.1  Ankyrin repeat proteins                           |                         |    |    |   |   |   |   |
|         |                        |                      |          |          | 8      |     | 10.2499    |          |                                                               |                         |    |    |   |   |   |   |
| FN1237  | 0.144                  | 9.322                | 1.478e-2 | 6.409e-2 | 25     | 22  | 25.0000    | 24.9009  | AAL95433.1  Choline kinase                                    |                         |    |    |   |   |   |   |
|         |                        |                      |          |          | 22     | 19  | 28.1873    | 23.2244  |                                                               |                         |    |    |   |   |   |   |
| FN1240  | -2.083                 | 8.300                | 2.962e-5 | 1.66e-5  | 7      | 30  | 7.0000     | 33.9558  | AAL95436.1  Lipopolysaccharide core biosynthesis protein rfaY |                         |    |    |   |   |   |   |
|         |                        |                      |          |          | 8      | 32  | 10.2499    | 39.1147  |                                                               |                         |    |    |   |   |   |   |
| FN1241  |                        |                      |          |          |        | 8   |            | 9.0549   | AAL95437.1  polysaccharide biosynthesis protein               |                         |    |    |   |   |   |   |
|         |                        |                      |          |          |        | 4   |            | 4.8893   |                                                               |                         |    |    |   |   |   |   |
| FN1242  | -0.936                 | 5.887                | 2.737e-3 | 8.818e-3 | 6      | 8   | 6.0000     | 9.0549   | AAL95438.1  Polysaccharide deacetylase                        |                         |    |    |   |   |   |   |
|         |                        |                      |          |          | 4      | 10  | 5.1250     | 12.2234  |                                                               |                         |    |    |   |   |   |   |
| FN1243  | -0.940                 | 6.429                | 2.902e-3 | 9.485e-3 | 7      | 13  | 7.0000     | 14.7142  | AAL95439.1  Glycosyl transferase                              |                         |    |    |   |   |   |   |
|         |                        |                      |          |          | 5      | 9   | 6.4062     | 11.0010  |                                                               |                         |    |    |   |   |   |   |
| FN1244  | -1.254                 | 6.278                | 2.128e-3 | 6.519e-3 | 5      | 10  | 5.0000     | 11.3186  | AAL95440.1  Polysaccharide deacetylase                        |                         |    |    |   |   |   |   |
|         |                        |                      |          |          | 5      | 13  | 6.4062     | 15.8904  |                                                               |                         |    |    |   |   |   |   |
| FN1245  |                        |                      |          |          |        | 22  |            | 24.9009  | AAL95441.1  Glycosyl transferase                              |                         |    |    |   |   |   |   |
|         |                        |                      |          |          |        | 11  |            | 13.4457  |                                                               |                         |    |    |   |   |   |   |
| FN1246  | -2.234                 | 6.119                |          |          |        | 19  |            | 21.5053  | AAL95442.1  Lipooligosaccharide cholinephosphotransferase     |                         |    |    |   |   |   |   |
|         |                        |                      |          |          | 3      | 12  | 3.8437     | 14.6680  |                                                               |                         |    |    |   |   |   |   |
| FN1247  | -1.668                 | 7.452                | 5.921e-4 | 1.237e-3 | 11     | 19  | 11.0000    | 21.5053  | AAL95443.1  LOS biosynthesis enzyme LBGB                      |                         |    |    |   |   |   |   |
|         |                        |                      |          |          | 3      | 21  | 3.8437     | 25.6690  |                                                               |                         |    |    |   |   |   |   |
| FN1248  |                        |                      |          |          |        | 5   |            | 5.6593   | AAL95444.1  Hypothetical cytosolic protein                    |                         |    |    |   |   |   |   |
|         |                        |                      |          |          |        |     |            |          |                                                               |                         |    |    |   |   |   |   |

Show detected proteins only  
 Show all proteins  
 Filter by category:

Proteins found: 1297

Test Cutoff

| Signif | Direction | Applies To   |
|--------|-----------|--------------|
| yes    | +         | ratios, bars |
| no     | n/a       | bars         |
| yes    | -         | ratios, bars |
| yes    | +         | p-, q-Values |
| yes    | -         |              |



Fn Summary Table FnPg vs Fn FnSg vs Fn FnPgSg vs Fn FnPgSg vs FnPg FnSg vs FnPg FnPgSg vs FnSg Fn Coverage

| Protein | FnPgSg vs Fn           |                      |          |          | Raw    |      | Normalized |           | Description                                              | Log <sub>2</sub> Ratios |    |    |   |   |   |   |
|---------|------------------------|----------------------|----------|----------|--------|------|------------|-----------|----------------------------------------------------------|-------------------------|----|----|---|---|---|---|
|         | Log <sub>2</sub> Ratio | Log <sub>2</sub> Sum | q-Value  | p-Value  | FnPgSg | Fn   | FnPgSg     | Fn        |                                                          | -6                      | -4 | -2 | 0 | 2 | 4 | 6 |
| FN1250  | -1.028                 | 10.069               | 5.004e-4 | 1.001e-3 | 19     | 46   | 19.0000    | 52.0655   | AAL95446.1  Guanine-hypoxanthine permease                |                         |    |    |   |   |   |   |
|         |                        |                      |          |          | 21     | 34   | 26.9060    | 41.5594   |                                                          |                         |    |    |   |   |   |   |
| FN1251  | -0.127                 | 6.344                | 8.453e-2 | 4.654e-1 | 7      | 8    | 7.0000     | 9.0549    | AAL95447.1  High-affinity iron permease                  |                         |    |    |   |   |   |   |
|         |                        |                      |          |          | 8      | 8    | 10.2499    | 9.7787    |                                                          |                         |    |    |   |   |   |   |
| FN1252  | -0.402                 | 18.857               | 4.009e-3 | 1.397e-2 | 667    | 638  | 667.0000   | 722.1260  | AAL95448.1  34 kDa membrane antigen precursor            |                         |    |    |   |   |   |   |
|         |                        |                      |          |          | 415    | 705  | 531.7144   | 861.7465  |                                                          |                         |    |    |   |   |   |   |
| FN1253  | -0.279                 | 16.411               | 8.377e-3 | 3.349e-2 | 240    | 268  | 240.0000   | 303.3382  | AAL95449.1  unknown                                      |                         |    |    |   |   |   |   |
|         |                        |                      |          |          | 231    | 284  | 295.9663   | 347.1433  |                                                          |                         |    |    |   |   |   |   |
| FN1254  | 0.021                  | 13.541               | 1.426e-1 | 8.416e-1 | 120    | 103  | 120.0000   | 116.5815  | AAL95450.1  Oxygen-insensitive NAD(P)H nitroreductase    |                         |    |    |   |   |   |   |
|         |                        |                      |          |          | 78     | 82   | 99.9367    | 100.2315  |                                                          |                         |    |    |   |   |   |   |
| FN1255  |                        |                      |          |          |        | 15   |            | 16.9779   | AAL95451.1  NagD protein                                 |                         |    |    |   |   |   |   |
|         |                        |                      |          |          |        | 14   |            | 17.1127   |                                                          |                         |    |    |   |   |   |   |
| FN1256  | -0.558                 | 4.443                |          |          |        | 5    |            | 5.6593    | AAL95452.1  C4-dicarboxylate transporter large subunit   |                         |    |    |   |   |   |   |
|         |                        |                      |          |          | 3      |      | 3.8437     |           |                                                          |                         |    |    |   |   |   |   |
| FN1258  | -0.263                 | 20.103               | 6.578e-5 | 5.964e-5 | 987    | 1049 | 987.0000   | 1187.3200 | AAL95454.1  C4-dicarboxylate-binding protein             |                         |    |    |   |   |   |   |
|         |                        |                      |          |          | 742    | 931  | 950.6797   | 1137.9944 |                                                          |                         |    |    |   |   |   |   |
| FN1260  | -0.594                 | 3.764                |          |          | 3      | 4    | 3.0000     | 4.5274    | AAL95456.1  Sensory Transduction Protein Kinase          |                         |    |    |   |   |   |   |
|         |                        |                      |          |          |        |      |            |           |                                                          |                         |    |    |   |   |   |   |
| FN1261  |                        |                      |          |          |        | 4    |            | 4.8893    | AAL95457.1  Two-component response regulator             |                         |    |    |   |   |   |   |
|         |                        |                      |          |          |        | 5    |            | 5.6593    |                                                          |                         |    |    |   |   |   |   |
| FN1262  |                        |                      |          |          |        |      |            |           | AAL95458.1  Integral membrane protein                    |                         |    |    |   |   |   |   |
|         |                        |                      |          |          |        |      |            |           |                                                          |                         |    |    |   |   |   |   |
| FN1263  | -0.555                 | 8.405                | 3.136e-6 | 6.101e-7 | 15     | 20   | 15.0000    | 22.6372   | AAL95459.1  Cobalt chelataase                            |                         |    |    |   |   |   |   |
|         |                        |                      |          |          | 12     | 18   | 15.3749    | 22.0020   |                                                          |                         |    |    |   |   |   |   |
| FN1264  | -1.171                 | 7.990                | 3.768e-3 | 1.295e-2 | 11     | 25   | 11.0000    | 28.2965   | AAL95460.1  Hypothetical protein                         |                         |    |    |   |   |   |   |
|         |                        |                      |          |          | 8      | 16   | 10.2499    | 19.5574   |                                                          |                         |    |    |   |   |   |   |
| FN1265  | -0.502                 | 12.394               | 7.692e-3 | 3.031e-2 | 49     | 83   | 49.0000    | 93.9443   | AAL95461.1  Outer membrane protein                       |                         |    |    |   |   |   |   |
|         |                        |                      |          |          | 58     | 66   | 74.3119    | 80.6741   |                                                          |                         |    |    |   |   |   |   |
| FN1266  | -0.561                 | 14.103               | 1.174e-3 | 2.972e-3 | 98     | 140  | 98.0000    | 158.4603  | AAL95462.1  UTP--glucose-1-phosphate uridylyltransferase |                         |    |    |   |   |   |   |
|         |                        |                      |          |          | 94     | 134  | 120.4365   | 163.7930  |                                                          |                         |    |    |   |   |   |   |
| FN1267  | -0.318                 | 10.057               | 2.622e-7 | 2.119e-8 | 29     | 32   | 29.0000    | 36.2195   | AAL95463.1  Hypothetical protein                         |                         |    |    |   |   |   |   |
|         |                        |                      |          |          | 23     | 30   | 29.4685    | 36.6701   |                                                          |                         |    |    |   |   |   |   |

Show detected proteins only  
 Show all proteins  
 Filter by category:

Proteins found: 1297

Enter (or paste) list of ORFs

Find ORFs

Test Cutoff

q-Value p-Value

.005

| Signif | Direction | Applies To   |
|--------|-----------|--------------|
| yes    | +         | ratios, bars |
| no     | n/a       | bars         |
| yes    | -         | ratios, bars |
| yes    | +         | p-, q-Values |
| yes    | -         | p-, q-Values |

Dot Plots Dot Plots

Fn Summary Table FnPg vs Fn FnSg vs Fn FnPgSg vs Fn FnPgSg vs FnPg FnSg vs FnPg FnPgSg vs FnSg Fn Coverage

| Protein | FnPgSg vs Fn           |                      |          |          | Raw    |     | Normalized |          | Description                                             | Log <sub>2</sub> Ratios |    |    |   |   |   |   |
|---------|------------------------|----------------------|----------|----------|--------|-----|------------|----------|---------------------------------------------------------|-------------------------|----|----|---|---|---|---|
|         | Log <sub>2</sub> Ratio | Log <sub>2</sub> Sum | q-Value  | p-Value  | FnPgSg | Fn  | FnPgSg     | Fn       |                                                         | -6                      | -4 | -2 | 0 | 2 | 4 | 6 |
| FN1268  | -0.610                 | 15.583               | 4.232e-3 | 1.493e-2 | 187    | 272 | 187.0000   | 307.8656 | AAL95464.1  Methionyl-tRNA synthetase                   |                         |    |    |   |   |   |   |
|         |                        |                      |          |          | 134    | 196 | 171.6861   | 239.5778 |                                                         |                         |    |    |   |   |   |   |
| FN1269  | -1.997                 | 5.882                |          |          |        | 12  |            | 13.5823  | AAL95465.1  Hypothetical lipoprotein                    |                         |    |    |   |   |   |   |
|         |                        |                      |          |          | 3      | 14  | 3.8437     | 17.1127  |                                                         |                         |    |    |   |   |   |   |
| FN1270  | 0.528                  | 14.416               | 4.406e-4 | 8.485e-4 | 177    | 115 | 177.0000   | 130.1638 | AAL95466.1  Hypothetical cytosolic protein              |                         |    |    |   |   |   |   |
|         |                        |                      |          |          | 139    | 95  | 178.0923   | 116.1219 |                                                         |                         |    |    |   |   |   |   |
| FN1271  | -0.310                 | 11.294               | 4.592e-3 | 1.648e-2 | 49     | 50  | 49.0000    | 56.5929  | AAL95467.1  Protease IV                                 |                         |    |    |   |   |   |   |
|         |                        |                      |          |          | 32     | 45  | 40.9997    | 55.0051  |                                                         |                         |    |    |   |   |   |   |
| FN1273  | -1.363                 | 9.239                | 1.301e-2 | 5.546e-2 | 14     | 47  | 14.0000    | 53.1974  | AAL95469.1  Outer membrane protein tolC                 |                         |    |    |   |   |   |   |
|         |                        |                      |          |          | 13     | 21  | 16.6561    | 25.6690  |                                                         |                         |    |    |   |   |   |   |
| FN1274  | -1.745                 | 9.340                | 4.319e-4 | 8.273e-4 | 15     | 37  | 15.0000    | 41.8788  | AAL95470.1  Acriflavin resistance protein E             |                         |    |    |   |   |   |   |
|         |                        |                      |          |          | 10     | 42  | 12.8124    | 51.3381  |                                                         |                         |    |    |   |   |   |   |
| FN1275  | -1.300                 | 10.297               | 7.017e-5 | 6.519e-5 | 26     | 53  | 26.0000    | 59.9885  | AAL95471.1  Acriflavin resistance protein B             |                         |    |    |   |   |   |   |
|         |                        |                      |          |          | 15     | 42  | 19.2186    | 51.3381  |                                                         |                         |    |    |   |   |   |   |
| FN1276  |                        |                      |          |          | 6      |     | 6.0000     |          | AAL95472.1  Hypothetical protein                        |                         |    |    |   |   |   |   |
|         |                        |                      |          |          | 7      |     | 8.9687     |          |                                                         |                         |    |    |   |   |   |   |
| FN1277  | 0.072                  | 14.785               | 6.748e-2 | 3.611e-1 | 169    | 133 | 169.0000   | 150.5372 | AAL95473.1  Aminoacyl-histidine dipeptidase             |                         |    |    |   |   |   |   |
|         |                        |                      |          |          | 137    | 145 | 175.5298   | 177.2386 |                                                         |                         |    |    |   |   |   |   |
| FN1278  |                        |                      |          |          |        |     |            |          | AAL95474.1  Acetyltransferase                           |                         |    |    |   |   |   |   |
|         |                        |                      |          |          | 9      |     | 11.5312    |          |                                                         |                         |    |    |   |   |   |   |
| FN1279  | -0.736                 | 11.827               | 8.152e-4 | 1.842e-3 | 46     | 64  | 46.0000    | 72.4390  | AAL95475.1  Zinc metallohydrolase, glyoxalase II family |                         |    |    |   |   |   |   |
|         |                        |                      |          |          | 37     | 68  | 47.4059    | 83.1188  |                                                         |                         |    |    |   |   |   |   |
| FN1280  | 0.286                  | 7.234                | 1.051e-2 | 4.36e-2  | 13     | 11  | 13.0000    | 12.4504  | AAL95476.1  Serine protease, V8 family                  |                         |    |    |   |   |   |   |
|         |                        |                      |          |          | 11     | 8   | 14.0936    | 9.7787   |                                                         |                         |    |    |   |   |   |   |
| FN1281  |                        |                      |          |          |        | 21  |            | 23.7690  | AAL95477.1  Cysteine protease                           |                         |    |    |   |   |   |   |
|         |                        |                      |          |          |        | 13  |            | 15.8904  |                                                         |                         |    |    |   |   |   |   |
| FN1282  | 0.704                  | 12.404               | 1.554e-5 | 6.064e-6 | 97     | 49  | 97.0000    | 55.4611  | AAL95478.1  LSU ribosomal protein L17P                  |                         |    |    |   |   |   |   |
|         |                        |                      |          |          | 71     | 49  | 90.9680    | 59.8944  |                                                         |                         |    |    |   |   |   |   |
| FN1283  | 1.182                  | 18.566               | 6.679e-6 | 1.76e-6  | 947    | 383 | 947.0000   | 433.5020 | AAL95479.1  DNA-directed RNA polymerase alpha chain     |                         |    |    |   |   |   |   |
|         |                        |                      |          |          | 726    | 322 | 930.1798   | 393.5920 |                                                         |                         |    |    |   |   |   |   |
| FN1284  | -0.356                 | 18.980               | 3.92e-5  | 2.886e-5 | 628    | 705 | 628.0000   | 797.9606 | AAL95480.1  SSU ribosomal protein S4P                   |                         |    |    |   |   |   |   |
|         |                        |                      |          |          | 502    | 678 | 643.1822   | 828.7435 |                                                         |                         |    |    |   |   |   |   |

Show detected proteins only  
 Show all proteins  
 Filter by category:

Proteins found: 1297

Enter (or paste) list of ORFs

Find ORFs

Test Cutoff

q-Value p-Value

.005

| Signif | Direction | Applies To   |
|--------|-----------|--------------|
| yes    | +         | ratios, bars |
| no     | n/a       | bars         |
| yes    | -         | ratios, bars |
| yes    | +         | p-, q-Values |
| yes    | -         | p-, q-Values |

Dot Plots Dot Plots

Fn Summary Table FnPg vs Fn FnSg vs Fn FnPgSg vs Fn FnPgSg vs FnPg FnSg vs FnPg FnPgSg vs FnSg Fn Coverage

| Protein | FnPgSg vs Fn           |                      |          |          | Raw    |     | Normalized |          | Description                                                          | Log <sub>2</sub> Ratios |    |    |   |   |   |   |
|---------|------------------------|----------------------|----------|----------|--------|-----|------------|----------|----------------------------------------------------------------------|-------------------------|----|----|---|---|---|---|
|         | Log <sub>2</sub> Ratio | Log <sub>2</sub> Sum | q-Value  | p-Value  | FnPgSg | Fn  | FnPgSg     | Fn       |                                                                      | -6                      | -4 | -2 | 0 | 2 | 4 | 6 |
| FN1285  | 0.344                  | 13.440               | 1.377e-3 | 3.737e-3 | 112    | 80  | 112.0000   | 90.5487  | AAL95481.1  SSU ribosomal protein S11P                               |                         |    |    |   |   |   |   |
|         |                        |                      |          |          | 98     | 79  | 125.5615   | 96.5645  |                                                                      |                         |    |    |   |   |   |   |
| FN1286  | -1.897                 | 15.240               | 3.128e-6 | 6.078e-7 | 118    | 323 | 118.0000   | 365.5904 | AAL95482.1  SSU ribosomal protein S13P                               |                         |    |    |   |   |   |   |
|         |                        |                      |          |          | 67     | 322 | 85.8430    | 393.5920 |                                                                      |                         |    |    |   |   |   |   |
| FN1287  | -2.396                 | 8.287                | 3.07e-5  | 1.768e-5 | 9      | 36  | 9.0000     | 40.7469  | AAL95483.1  Bacterial Protein Translation Initiation Factor 1 (IF-1) |                         |    |    |   |   |   |   |
|         |                        |                      |          |          | 5      | 33  | 6.4062     | 40.3371  |                                                                      |                         |    |    |   |   |   |   |
| FN1290  | -1.483                 | 8.099                | 2.174e-4 | 3.29e-4  | 7      | 23  | 7.0000     | 26.0328  | AAL95486.1  Hypothetical protein                                     |                         |    |    |   |   |   |   |
|         |                        |                      |          |          | 10     | 24  | 12.8124    | 29.3361  |                                                                      |                         |    |    |   |   |   |   |
| FN1293  | -0.693                 | 5.408                |          |          |        | 6   |            | 6.7912   | AAL95489.1  Hypothetical protein                                     |                         |    |    |   |   |   |   |
|         |                        |                      |          |          | 4      | 8   | 5.1250     | 9.7787   |                                                                      |                         |    |    |   |   |   |   |
| FN1296  | -1.566                 | 7.856                | 5.053e-3 | 1.849e-2 | 10     | 29  | 10.0000    | 32.8239  | AAL95492.1  unknown                                                  |                         |    |    |   |   |   |   |
|         |                        |                      |          |          | 6      | 16  | 7.6874     | 19.5574  |                                                                      |                         |    |    |   |   |   |   |
| FN1297  | 0.451                  | 10.532               | 6.444e-3 | 2.469e-2 | 40     | 29  | 40.0000    | 32.8239  | AAL95493.1  Methionine aminopeptidase                                |                         |    |    |   |   |   |   |
|         |                        |                      |          |          | 39     | 27  | 49.9683    | 33.0031  |                                                                      |                         |    |    |   |   |   |   |
| FN1298  | -0.430                 | 13.144               | 1.609e-2 | 7.057e-2 | 64     | 99  | 64.0000    | 112.0540 | AAL95494.1  Adenylate kinase                                         |                         |    |    |   |   |   |   |
|         |                        |                      |          |          | 78     | 89  | 99.9367    | 108.7879 |                                                                      |                         |    |    |   |   |   |   |
| FN1301  | -0.404                 | 12.985               | 8.358e-4 | 1.9e-3   | 72     | 88  | 72.0000    | 99.6036  | AAL95497.1  ABC transporter ATP-binding protein                      |                         |    |    |   |   |   |   |
|         |                        |                      |          |          | 66     | 88  | 84.5618    | 107.5655 |                                                                      |                         |    |    |   |   |   |   |
| FN1302  | 0.595                  | 17.439               | 1.779e-3 | 5.238e-3 | 566    | 349 | 566.0000   | 395.0188 | AAL95498.1  Hypothetical protein                                     |                         |    |    |   |   |   |   |
|         |                        |                      |          |          | 367    | 238 | 470.2149   | 290.9159 |                                                                      |                         |    |    |   |   |   |   |
| FN1303  | -0.764                 | 12.525               | 5.782e-5 | 4.994e-5 | 64     | 85  | 64.0000    | 96.2080  | AAL95499.1  hypothetical cytosolic protein                           |                         |    |    |   |   |   |   |
|         |                        |                      |          |          | 42     | 85  | 53.8121    | 103.8985 |                                                                      |                         |    |    |   |   |   |   |
| FN1304  | -0.135                 | 14.308               | 1.864e-2 | 8.348e-2 | 145    | 133 | 145.0000   | 150.5372 | AAL95500.1  Single-strand DNA binding protein                        |                         |    |    |   |   |   |   |
|         |                        |                      |          |          | 99     | 121 | 126.8427   | 147.9026 |                                                                      |                         |    |    |   |   |   |   |
| FN1305  | -0.462                 | 9.965                | 2.969e-2 | 1.419e-1 | 18     | 31  | 18.0000    | 35.0876  | AAL95501.1  Hypothetical cytosolic protein                           |                         |    |    |   |   |   |   |
|         |                        |                      |          |          | 28     | 32  | 35.8747    | 39.1147  |                                                                      |                         |    |    |   |   |   |   |
| FN1306  | -1.696                 | 11.192               | 1.299e-5 | 4.587e-6 | 23     | 75  | 23.0000    | 84.8894  | AAL95502.1  Methyltransferase                                        |                         |    |    |   |   |   |   |
|         |                        |                      |          |          | 24     | 73  | 30.7497    | 89.2305  |                                                                      |                         |    |    |   |   |   |   |
| FN1309  | 0.143                  | 16.647               | 2.402e-2 | 1.11e-1  | 312    | 272 | 312.0000   | 307.8656 | AAL95505.1  Hypothetical protein                                     |                         |    |    |   |   |   |   |
|         |                        |                      |          |          | 282    | 247 | 361.3095   | 301.9169 |                                                                      |                         |    |    |   |   |   |   |
| FN1311  |                        |                      |          |          |        | 8   |            | 9.7787   | AAL95507.1  Biopolymer transport exbD protein                        |                         |    |    |   |   |   |   |
|         |                        |                      |          |          |        |     |            |          |                                                                      |                         |    |    |   |   |   |   |

Show detected proteins only  
 Show all proteins  
 Filter by category:

Proteins found: 1297

Enter (or paste) list of ORFs

Find ORFs

Test Cutoff

q-Value p-Value

.005

| Signif | Direction | Applies To   |
|--------|-----------|--------------|
| yes    | +         | ratios, bars |
| no     | n/a       | bars         |
| yes    | -         | ratios, bars |
| yes    | +         | p-, q-Values |
| yes    | -         | p-, q-Values |

Dot Plots Dot Plots

Fn Summary Table FnPg vs Fn FnSg vs Fn FnPgSg vs Fn FnPgSg vs FnPg FnSg vs FnPg FnPgSg vs FnSg Fn Coverage

| Protein | FnPgSg vs Fn           |                      |          |          | Raw    |     | Normalized |          | Description                                                        | Log <sub>2</sub> Ratios |    |    |   |   |   |   |
|---------|------------------------|----------------------|----------|----------|--------|-----|------------|----------|--------------------------------------------------------------------|-------------------------|----|----|---|---|---|---|
|         | Log <sub>2</sub> Ratio | Log <sub>2</sub> Sum | q-Value  | p-Value  | FnPgSg | Fn  | FnPgSg     | Fn       |                                                                    | -6                      | -4 | -2 | 0 | 2 | 4 | 6 |
| FN1312  |                        |                      |          |          |        | 44  |            | 49.8018  | AAL95508.1  Biopolymer transport exbB protein                      |                         |    |    |   |   |   |   |
|         |                        |                      |          |          |        | 52  |            | 63.5614  |                                                                    |                         |    |    |   |   |   |   |
| FN1313  | -0.522                 | 12.653               | 1.252e-2 | 5.31e-2  | 84     | 90  | 84.0000    | 101.8673 | AAL95509.1  Oligopeptide-binding protein oppA                      |                         |    |    |   |   |   |   |
|         |                        |                      |          |          | 39     | 74  | 49.9683    | 90.4528  |                                                                    |                         |    |    |   |   |   |   |
| FN1315  |                        |                      |          |          |        | 7   |            | 7.9230   | AAL95511.1  Hypothetical protein                                   |                         |    |    |   |   |   |   |
|         |                        |                      |          |          |        |     |            |          |                                                                    |                         |    |    |   |   |   |   |
| FN1317  |                        |                      |          |          |        | 13  |            | 14.7142  | AAL95513.1  RNA polymerase sigma factor                            |                         |    |    |   |   |   |   |
|         |                        |                      |          |          |        | 14  |            | 17.1127  |                                                                    |                         |    |    |   |   |   |   |
| FN1318  | -0.272                 | 10.274               | 9.167e-3 | 3.726e-2 | 32     | 37  | 32.0000    | 41.8788  | AAL95514.1  RNA polymerase sigma factor rpoD                       |                         |    |    |   |   |   |   |
|         |                        |                      |          |          | 25     | 29  | 32.0310    | 35.4477  |                                                                    |                         |    |    |   |   |   |   |
| FN1319  | -0.848                 | 6.655                | 8.414e-4 | 1.916e-3 | 6      | 13  | 6.0000     | 14.7142  | AAL95515.1  DNA primase                                            |                         |    |    |   |   |   |   |
|         |                        |                      |          |          | 7      | 10  | 8.9687     | 12.2234  |                                                                    |                         |    |    |   |   |   |   |
| FN1320  | -0.838                 | 16.608               | 3.695e-4 | 6.744e-4 | 205    | 385 | 205.0000   | 435.7657 | AAL95516.1  Peptidyl-prolyl cis-trans isomerase                    |                         |    |    |   |   |   |   |
|         |                        |                      |          |          | 209    | 335 | 267.7790   | 409.4824 |                                                                    |                         |    |    |   |   |   |   |
| FN1321  | 0.034                  | 19.388               | 1.389e-1 | 8.162e-1 | 969    | 752 | 969.0000   | 851.1579 | AAL95517.1  Acetoacetate metabolism regulatory protein atoC        |                         |    |    |   |   |   |   |
|         |                        |                      |          |          | 552    | 643 | 707.2442   | 785.9617 |                                                                    |                         |    |    |   |   |   |   |
| FN1322  | -1.666                 | 6.310                |          |          | 5      | 14  | 5.0000     | 15.8460  | AAL95518.1  Membrane metalloprotease                               |                         |    |    |   |   |   |   |
|         |                        |                      |          |          |        | 13  |            | 15.8904  |                                                                    |                         |    |    |   |   |   |   |
| FN1323  | -0.909                 | 6.954                | 2.423e-3 | 7.603e-3 | 6      | 14  | 6.0000     | 15.8460  | AAL95519.1  Thymidylate kinase                                     |                         |    |    |   |   |   |   |
|         |                        |                      |          |          | 8      | 12  | 10.2499    | 14.6680  |                                                                    |                         |    |    |   |   |   |   |
| FN1324  | -0.681                 | 9.203                | 7.383e-3 | 2.889e-2 | 14     | 23  | 14.0000    | 26.0328  | AAL95520.1  1-deoxy-D-xylulose 5-phosphate reductoisomerase        |                         |    |    |   |   |   |   |
|         |                        |                      |          |          | 19     | 29  | 24.3435    | 35.4477  |                                                                    |                         |    |    |   |   |   |   |
| FN1326  | -0.660                 | 6.990                |          |          |        | 11  |            | 12.4504  | AAL95522.1  Undecaprenyl pyrophosphate synthetase                  |                         |    |    |   |   |   |   |
|         |                        |                      |          |          | 7      | 13  | 8.9687     | 15.8904  |                                                                    |                         |    |    |   |   |   |   |
| FN1327  | 1.125                  | 4.875                |          |          | 8      |     | 8.0000     |          | AAL95523.1  Dimethylallyltransferase                               |                         |    |    |   |   |   |   |
|         |                        |                      |          |          |        | 3   |            | 3.6670   |                                                                    |                         |    |    |   |   |   |   |
| FN1328  | -1.790                 | 5.733                | 3.431e-4 | 6.073e-4 | 4      | 11  | 4.0000     | 12.4504  | AAL95524.1  Exodeoxyribonuclease VII small subunit                 |                         |    |    |   |   |   |   |
|         |                        |                      |          |          | 3      | 12  | 3.8437     | 14.6680  |                                                                    |                         |    |    |   |   |   |   |
| FN1330  |                        |                      |          |          |        | 3   |            | 3.3956   | AAL95526.1  S-adenosylmethionine:tRNA ribosyltransferase-isomerase |                         |    |    |   |   |   |   |
|         |                        |                      |          |          |        |     |            |          |                                                                    |                         |    |    |   |   |   |   |
| FN1331  | 0.309                  | 6.206                | 9.769e-2 | 5.477e-1 | 14     | 5   | 14.0000    | 5.6593   | AAL95527.1  Methyltransferase                                      |                         |    |    |   |   |   |   |
|         |                        |                      |          |          | 4      | 8   | 5.1250     | 9.7787   |                                                                    |                         |    |    |   |   |   |   |

Show detected proteins only  
 Show all proteins  
 Filter by category:

Proteins found: 1297

Test Cutoff

| Signif | Direction | Applies To   |
|--------|-----------|--------------|
| yes    | +         | ratios, bars |
| no     | n/a       | bars         |
| yes    | -         | ratios, bars |
| yes    | +         | p-, q-Values |
| yes    | -         |              |

Fn Summary Table FnPg vs Fn FnSg vs Fn FnPgSg vs Fn FnPgSg vs FnPg FnSg vs FnPg FnPgSg vs FnSg Fn Coverage

| Protein | FnPgSg vs Fn           |                      |          |          | Raw    |     | Normalized |          | Description                                                 | Log <sub>2</sub> Ratios |    |    |   |   |   |   |
|---------|------------------------|----------------------|----------|----------|--------|-----|------------|----------|-------------------------------------------------------------|-------------------------|----|----|---|---|---|---|
|         | Log <sub>2</sub> Ratio | Log <sub>2</sub> Sum | q-Value  | p-Value  | FnPgSg | Fn  | FnPgSg     | Fn       |                                                             | -6                      | -4 | -2 | 0 | 2 | 4 | 6 |
| FN1332  | -0.278                 | 11.697               | 8.455e-3 | 3.385e-2 | 47     | 57  | 47.0000    | 64.5160  | AAL95528.1  Bacterial Peptide Chain Release Factor 1 (RF-1) |                         |    |    |   |   |   |   |
|         |                        |                      |          |          | 45     | 51  | 57.6558    | 62.3391  |                                                             |                         |    |    |   |   |   |   |
| FN1334  | -0.454                 | 7.624                |          |          | 12     | 15  | 12.0000    | 16.9779  | AAL95530.1  N-acetylmuramoyl-L-alanine amidase              |                         |    |    |   |   |   |   |
|         |                        |                      |          |          |        | 13  |            | 15.8904  |                                                             |                         |    |    |   |   |   |   |
| FN1335  | 1.254                  | 14.366               | 4.279e-3 | 1.514e-2 | 176    | 95  | 176.0000   | 107.5266 | AAL95531.1  Protein translocase subunit YajC                |                         |    |    |   |   |   |   |
|         |                        |                      |          |          | 213    | 66  | 272.9040   | 80.6741  |                                                             |                         |    |    |   |   |   |   |
| FN1336  |                        |                      |          |          |        | 21  |            | 23.7690  | AAL95532.1  Hypothetical protein                            |                         |    |    |   |   |   |   |
|         |                        |                      |          |          |        | 23  |            | 28.1137  |                                                             |                         |    |    |   |   |   |   |
| FN1337  | -2.390                 | 7.560                |          |          | 6      | 21  | 6.0000     | 23.7690  | AAL95533.1  unknown                                         |                         |    |    |   |   |   |   |
|         |                        |                      |          |          |        | 32  |            | 39.1147  |                                                             |                         |    |    |   |   |   |   |
| FN1340  | 0.070                  | 16.993               | 9.03e-2  | 5.012e-1 | 403    | 288 | 403.0000   | 325.9754 | AAL95536.1  Glutamyl-tRNA synthetase                        |                         |    |    |   |   |   |   |
|         |                        |                      |          |          | 263    | 310 | 336.9660   | 378.9240 |                                                             |                         |    |    |   |   |   |   |
| FN1341  | 0.410                  | 7.913                | 2.967e-2 | 1.418e-1 | 14     | 13  | 14.0000    | 14.7142  | AAL95537.1  Bacterial Peptide Chain Release Factor 2 (RF-2) |                         |    |    |   |   |   |   |
|         |                        |                      |          |          | 17     | 10  | 21.7811    | 12.2234  |                                                             |                         |    |    |   |   |   |   |
| FN1343  |                        |                      |          |          |        | 13  |            | 14.7142  | AAL95539.1  seC-independent protein TATD                    |                         |    |    |   |   |   |   |
|         |                        |                      |          |          |        |     |            |          |                                                             |                         |    |    |   |   |   |   |
| FN1347  | -1.168                 | 8.025                | 8.866e-4 | 2.047e-3 | 10     | 19  | 10.0000    | 21.5053  | AAL95543.1  Hypothetical cytosolic protein                  |                         |    |    |   |   |   |   |
|         |                        |                      |          |          | 9      | 22  | 11.5312    | 26.8914  |                                                             |                         |    |    |   |   |   |   |
| FN1348  | -0.313                 | 8.818                | 1.086e-1 | 6.168e-1 | 33     | 17  | 33.0000    | 19.2416  | AAL95544.1  ABC transporter ATP-binding protein             |                         |    |    |   |   |   |   |
|         |                        |                      |          |          | 4      | 23  | 5.1250     | 28.1137  |                                                             |                         |    |    |   |   |   |   |
| FN1349  | -2.237                 | 8.237                |          |          | 8      | 31  | 8.0000     | 35.0876  | AAL95545.1  ABC transporter permease protein                |                         |    |    |   |   |   |   |
|         |                        |                      |          |          |        | 33  |            | 40.3371  |                                                             |                         |    |    |   |   |   |   |
| FN1351  | -1.101                 | 10.178               | 6.715e-3 | 2.589e-2 | 17     | 33  | 17.0000    | 37.3513  | AAL95547.1  15 kDa lipoprotein precursor                    |                         |    |    |   |   |   |   |
|         |                        |                      |          |          | 23     | 51  | 29.4685    | 62.3391  |                                                             |                         |    |    |   |   |   |   |
| FN1352  | -0.191                 | 11.812               | 1.493e-2 | 6.484e-2 | 61     | 56  | 61.0000    | 63.3841  | AAL95548.1  ABC transporter ATP-binding protein             |                         |    |    |   |   |   |   |
|         |                        |                      |          |          | 40     | 53  | 51.2496    | 64.7838  |                                                             |                         |    |    |   |   |   |   |
| FN1353  | -0.576                 | 7.133                | 5.372e-2 | 2.804e-1 | 13     | 18  | 13.0000    | 20.3735  | AAL95549.1  ABC transporter permease protein                |                         |    |    |   |   |   |   |
|         |                        |                      |          |          | 5      | 7   | 6.4062     | 8.5563   |                                                             |                         |    |    |   |   |   |   |
| FN1354  | -0.511                 | 9.426                | 7.899e-3 | 3.126e-2 | 26     | 24  | 26.0000    | 27.1646  | AAL95550.1  ABC transporter permease protein                |                         |    |    |   |   |   |   |
|         |                        |                      |          |          | 14     | 29  | 17.9374    | 35.4477  |                                                             |                         |    |    |   |   |   |   |
| FN1355  | -1.125                 | 4.295                |          |          | 3      | 4   | 3.0000     | 4.5274   | AAL95551.1  Integral membrane protein                       |                         |    |    |   |   |   |   |
|         |                        |                      |          |          |        | 7   |            | 8.5563   |                                                             |                         |    |    |   |   |   |   |

Show detected proteins only  
 Show all proteins  
 Filter by category:

Proteins found: 1297

Enter (or paste) list of ORFs

Find ORFs

Test Cutoff

q-Value

p-Value

.005

| Signif | Direction | Applies To   |
|--------|-----------|--------------|
| yes    | +         | ratios, bars |
| no     | n/a       | bars         |
| yes    | -         | ratios, bars |
| yes    | +         | p-, q-Values |
| yes    | -         | p-, q-Values |

Dot Plots

Fn Summary Table FnPg vs Fn FnSg vs Fn FnPgSg vs Fn FnPgSg vs FnPg FnSg vs FnPg FnPgSg vs FnSg Fn Coverage

| Protein | FnPgSg vs Fn           |                      |          |          | Raw    |     | Normalized |          | Description                                              | Log <sub>2</sub> Ratios |    |    |   |   |   |   |
|---------|------------------------|----------------------|----------|----------|--------|-----|------------|----------|----------------------------------------------------------|-------------------------|----|----|---|---|---|---|
|         | Log <sub>2</sub> Ratio | Log <sub>2</sub> Sum | q-Value  | p-Value  | FnPgSg | Fn  | FnPgSg     | Fn       |                                                          | -6                      | -4 | -2 | 0 | 2 | 4 | 6 |
| FN1358  |                        |                      |          |          | 38     |     | 38.0000    |          | AAL95554.1  Hypothetical protein                         |                         |    |    |   |   |   |   |
|         |                        |                      |          |          | 26     |     | 33.3122    |          |                                                          |                         |    |    |   |   |   |   |
| FN1359  | -0.764                 | 13.669               | 1.43e-3  | 3.94e-3  | 97     | 116 | 97.0000    | 131.2956 | AAL95555.1  Dipeptide-binding protein                    |                         |    |    |   |   |   |   |
|         |                        |                      |          |          | 61     | 136 | 78.1556    | 166.2376 |                                                          |                         |    |    |   |   |   |   |
| FN1363  | -1.279                 | 5.568                | 1.554e-2 | 6.78e-2  | 5      | 6   | 5.0000     | 6.7912   | AAL95559.1  Dipeptide transport ATP-binding protein dppF |                         |    |    |   |   |   |   |
|         |                        |                      |          |          | 3      | 12  | 3.8437     | 14.6680  |                                                          |                         |    |    |   |   |   |   |
| FN1364  | -0.834                 | 12.373               | 1.019e-3 | 2.451e-3 | 54     | 79  | 54.0000    | 89.4169  | AAL95560.1  LSU ribosomal protein L32P                   |                         |    |    |   |   |   |   |
|         |                        |                      |          |          | 43     | 86  | 55.0933    | 105.1209 |                                                          |                         |    |    |   |   |   |   |
| FN1365  | 0.213                  | 14.951               | 5.136e-3 | 1.885e-2 | 186    | 156 | 186.0000   | 176.5700 | AAL95561.1  GTP-binding protein                          |                         |    |    |   |   |   |   |
|         |                        |                      |          |          | 154    | 126 | 197.3109   | 154.0143 |                                                          |                         |    |    |   |   |   |   |
| FN1366  | 0.931                  | 16.145               | 5.722e-5 | 4.925e-5 | 350    | 190 | 350.0000   | 215.0532 | AAL95562.1  Triosephosphate isomerase                    |                         |    |    |   |   |   |   |
|         |                        |                      |          |          | 307    | 143 | 393.3405   | 174.7940 |                                                          |                         |    |    |   |   |   |   |
| FN1374  | -0.455                 | 6.795                |          |          | 9      | 11  | 9.0000     | 12.4504  | AAL95570.1  Transcriptional regulator                    |                         |    |    |   |   |   |   |
|         |                        |                      |          |          |        | 10  |            | 12.2234  |                                                          |                         |    |    |   |   |   |   |
| FN1375  | -0.308                 | 9.394                | 4.839e-3 | 1.754e-2 | 21     | 24  | 21.0000    | 27.1646  | AAL95571.1  Citrate-sodium symport                       |                         |    |    |   |   |   |   |
|         |                        |                      |          |          | 20     | 25  | 25.6248    | 30.5584  |                                                          |                         |    |    |   |   |   |   |
| FN1376  | -1.002                 | 17.319               | 3.112e-4 | 5.309e-4 | 319    | 510 | 319.0000   | 577.2481 | AAL95572.1  Oxaloacetate decarboxylase alpha chain       |                         |    |    |   |   |   |   |
|         |                        |                      |          |          | 197    | 464 | 252.4042   | 567.1637 |                                                          |                         |    |    |   |   |   |   |
| FN1378  | -0.500                 | 9.927                | 1.515e-3 | 4.27e-3  | 23     | 31  | 23.0000    | 35.0876  | AAL95574.1  Citrate lyase acyl carrier protein           |                         |    |    |   |   |   |   |
|         |                        |                      |          |          | 23     | 32  | 29.4685    | 39.1147  |                                                          |                         |    |    |   |   |   |   |
| FN1379  | -0.144                 | 14.985               | 3.171e-2 | 1.534e-1 | 185    | 179 | 185.0000   | 202.6028 | AAL95575.1  Citrate lyase beta chain                     |                         |    |    |   |   |   |   |
|         |                        |                      |          |          | 123    | 144 | 157.5925   | 176.0163 |                                                          |                         |    |    |   |   |   |   |
| FN1380  | -0.006                 | 17.151               | 1.519e-1 | 9.066e-1 | 359    | 344 | 359.0000   | 389.3595 | AAL95576.1  Citrate lyase beta chain                     |                         |    |    |   |   |   |   |
|         |                        |                      |          |          | 314    | 307 | 402.3092   | 375.2570 |                                                          |                         |    |    |   |   |   |   |
| FN1381  | -0.293                 | 4.178                |          |          |        | 4   |            | 4.5274   | AAL95577.1  unknown                                      |                         |    |    |   |   |   |   |
|         |                        |                      |          |          | 3      | 4   | 3.8437     | 4.8893   |                                                          |                         |    |    |   |   |   |   |
| FN1383  |                        |                      |          |          | 3      |     | 3.0000     |          | AAL95579.1  DNA polymerase III alpha subunit             |                         |    |    |   |   |   |   |
|         |                        |                      |          |          |        |     |            |          |                                                          |                         |    |    |   |   |   |   |
| FN1385  |                        |                      |          |          |        | 6   |            | 6.7912   | AAL95581.1  Hypothetical protein                         |                         |    |    |   |   |   |   |
|         |                        |                      |          |          |        | 8   |            | 9.7787   |                                                          |                         |    |    |   |   |   |   |
| FN1386  | 1.058                  | 6.478                | 6.956e-3 | 2.696e-2 | 17     | 4   | 17.0000    | 4.5274   | AAL95582.1  SWF/SNF family helicase                      |                         |    |    |   |   |   |   |
|         |                        |                      |          |          | 8      | 7   | 10.2499    | 8.5563   |                                                          |                         |    |    |   |   |   |   |

Show detected proteins only  
 Show all proteins  
 Filter by category:

Proteins found: 1297

Enter (or paste) list of ORFs

**Test**      **Cutoff**  
     

| Signif | Direction | Applies To   |
|--------|-----------|--------------|
| yes    | +         | ratios, bars |
| no     | n/a       | bars         |
| yes    | -         | ratios, bars |
| yes    | +         | p-, q-Values |
| yes    | -         |              |

Fn Summary Table FnPg vs Fn FnSg vs Fn FnPgSg vs Fn FnPgSg vs FnPg FnSg vs FnPg FnPgSg vs FnSg Fn Coverage

| Protein | FnPgSg vs Fn           |                      |          |          | Raw    |     | Normalized |           | Description                                                | Log <sub>2</sub> Ratios |    |    |   |   |   |   |
|---------|------------------------|----------------------|----------|----------|--------|-----|------------|-----------|------------------------------------------------------------|-------------------------|----|----|---|---|---|---|
|         | Log <sub>2</sub> Ratio | Log <sub>2</sub> Sum | q-Value  | p-Value  | FnPgSg | Fn  | FnPgSg     | Fn        |                                                            | -6                      | -4 | -2 | 0 | 2 | 4 | 6 |
| FN1391  | -1.264                 | 12.297               | 8.207e-4 | 1.858e-3 | 39     | 110 | 39.0000    | 124.5045  | AAL95584.1  Acetyltransferase                              |                         |    |    |   |   |   |   |
|         |                        |                      |          |          | 41     | 78  | 52.5308    | 95.3422   |                                                            | ■                       |    |    |   |   |   |   |
| FN1392  | -0.204                 | 15.130               | 3.254e-3 | 1.087e-2 | 185    | 181 | 185.0000   | 204.8665  | AAL95585.1  SSU ribosomal protein S16P                     |                         |    |    |   |   |   |   |
|         |                        |                      |          |          | 131    | 165 | 167.8424   | 201.6854  |                                                            | ■                       |    |    |   |   |   |   |
| FN1393  | -1.034                 | 10.766               | 3.196e-4 | 5.504e-4 | 25     | 58  | 25.0000    | 65.6478   | AAL95586.1  Signal recognition particle, subunit FFH/SRP54 |                         |    |    |   |   |   |   |
|         |                        |                      |          |          | 26     | 44  | 33.3122    | 53.7828   |                                                            | ■                       |    |    |   |   |   |   |
| FN1397  | -0.464                 | 14.574               | 8.85e-3  | 3.573e-2 | 157    | 161 | 157.0000   | 182.2293  | AAL95590.1  Glutaminase                                    |                         |    |    |   |   |   |   |
|         |                        |                      |          |          | 85     | 151 | 108.9054   | 184.5727  |                                                            | ■                       |    |    |   |   |   |   |
| FN1398  | 0.635                  | 14.217               | 5.686e-3 | 2.129e-2 | 171    | 119 | 171.0000   | 134.6912  | AAL95591.1  Amino acid carrier protein alsT                |                         |    |    |   |   |   |   |
|         |                        |                      |          |          | 135    | 71  | 172.9673   | 86.7858   |                                                            | ■                       |    |    |   |   |   |   |
| FN1400  |                        |                      |          |          | 7      |     |            |           | AAL95593.1  serine/threonine kinase                        |                         |    |    |   |   |   |   |
|         |                        |                      |          |          |        |     | 8.9687     |           |                                                            |                         |    |    |   |   |   |   |
| FN1406  | -0.021                 | 11.536               | 1.483e-1 | 8.813e-1 | 48     | 43  | 48.0000    | 48.6699   | AAL95599.1  Histidine ammonia-lyase                        |                         |    |    |   |   |   |   |
|         |                        |                      |          |          | 47     | 50  | 60.2183    | 61.1168   |                                                            |                         |    |    |   |   |   |   |
| FN1407  | 0.617                  | 7.439                | 6.913e-2 | 3.709e-1 | 7      | 8   | 7.0000     | 9.0549    | AAL95600.1  Glutamate formiminotransferase                 |                         |    |    |   |   |   |   |
|         |                        |                      |          |          | 20     | 10  | 25.6248    | 12.2234   |                                                            | ■                       |    |    |   |   |   |   |
| FN1411  | 0.339                  | 14.464               | 4.53e-2  | 2.315e-1 | 210    | 112 | 210.0000   | 126.7682  | AAL95604.1  Threonine dehydratase                          |                         |    |    |   |   |   |   |
|         |                        |                      |          |          | 100    | 115 | 128.1239   | 140.5686  |                                                            | ■                       |    |    |   |   |   |   |
| FN1413  |                        |                      |          |          | 3      |     | 3.0000     |           | AAL95606.1  Translation initiation factor EIF-2B subunit 1 |                         |    |    |   |   |   |   |
|         |                        |                      |          |          |        |     |            |           |                                                            |                         |    |    |   |   |   |   |
| FN1416  |                        |                      |          |          | 5      |     | 5.0000     |           | AAL95609.1  Transcriptional regulator, GntR family         |                         |    |    |   |   |   |   |
|         |                        |                      |          |          | 3      |     | 3.8437     |           |                                                            |                         |    |    |   |   |   |   |
| FN1417  | 0.032                  | 4.612                |          |          | 5      |     | 5.0000     |           | AAL95610.1  L-fucose phosphate aldolase                    |                         |    |    |   |   |   |   |
|         |                        |                      |          |          |        | 4   |            | 4.8893    |                                                            |                         |    |    |   |   |   |   |
| FN1418  |                        |                      |          |          |        | 4   |            | 4.8893    | AAL95611.1  Transcriptional regulator, GntR family         |                         |    |    |   |   |   |   |
|         |                        |                      |          |          |        |     |            |           |                                                            |                         |    |    |   |   |   |   |
| FN1419  | 2.033                  | 20.268               | 1.133e-6 | 1.531e-7 | 2312   | 475 | 2312.0000  | 537.6330  | AAL95612.1  Methionine gamma-lyase                         |                         |    |    |   |   |   |   |
|         |                        |                      |          |          | 1743   | 469 | 2233.2004  | 573.2754  |                                                            | ■                       |    |    |   |   |   |   |
| FN1420  |                        |                      |          |          | 14     |     | 14.0000    |           | AAL95613.1  NA+/H+ antiporter NHAC                         |                         |    |    |   |   |   |   |
|         |                        |                      |          |          |        |     |            |           |                                                            |                         |    |    |   |   |   |   |
| FN1421  | 0.210                  | 20.155               | 2.186e-3 | 6.729e-3 | 1134   | 842 | 1134.0000  | 953.0252  | AAL95614.1  Pyruvate-flavodoxin oxidoreductase             |                         |    |    |   |   |   |   |
|         |                        |                      |          |          | 929    | 864 | 1190.2714  | 1056.0979 |                                                            | ■                       |    |    |   |   |   |   |

Show detected proteins only  
 Show all proteins  
 Filter by category:

Proteins found: 1297

Test Cutoff

| Signif | Direction | Applies To   |
|--------|-----------|--------------|
| ■      | +         | ratios, bars |
| ■      | n/a       | bars         |
| ■      | -         | ratios, bars |
| ■      | +         | p-, q-Values |
| ■      | -         | p-, q-Values |

Fn Summary Table   FnPg vs Fn   FnSg vs Fn   FnPgSg vs Fn   FnPgSg vs FnPg   FnSg vs FnPg   FnPgSg vs FnSg   Fn Coverage

| Protein | FnPgSg vs Fn           |                      |          |          | Raw    |     | Normalized |          | Description                                                                         | Log <sub>2</sub> Ratios |    |    |   |   |   |   |
|---------|------------------------|----------------------|----------|----------|--------|-----|------------|----------|-------------------------------------------------------------------------------------|-------------------------|----|----|---|---|---|---|
|         | Log <sub>2</sub> Ratio | Log <sub>2</sub> Sum | q-Value  | p-Value  | FnPgSg | Fn  | FnPgSg     | Fn       |                                                                                     | -6                      | -4 | -2 | 0 | 2 | 4 | 6 |
| FN1423  | 0.330                  | 15.111               | 3.541e-3 | 1.202e-2 | 227    | 155 | 227.0000   | 175.4381 | AAL95616.1  Flavoprotein                                                            |                         |    |    |   |   |   |   |
|         |                        |                      |          |          | 152    | 131 | 194.7484   | 160.1260 |                                                                                     |                         |    |    |   |   |   |   |
| FN1424  | 0.207                  | 17.125               | 5.448e-2 | 2.85e-1  | 478    | 329 | 478.0000   | 372.3816 | AAL95617.1  ACYL-COA dehydrogenase, short-chain specific                            |                         |    |    |   |   |   |   |
|         |                        |                      |          |          | 261    | 271 | 334.4035   | 331.2529 |                                                                                     |                         |    |    |   |   |   |   |
| FN1426  | -1.863                 | 16.445               | 4.383e-5 | 3.382e-5 | 130    | 496 | 130.0000   | 561.4020 | AAL95619.1  Serine protease                                                         |                         |    |    |   |   |   |   |
|         |                        |                      |          |          | 143    | 473 | 183.2172   | 578.1647 |                                                                                     |                         |    |    |   |   |   |   |
| FN1427  |                        |                      |          |          | 6      |     | 6.0000     |          | AAL95620.1  Phenazine biosynthesis protein phzF                                     |                         |    |    |   |   |   |   |
|         |                        |                      |          |          | 4      |     | 5.1250     |          |                                                                                     |                         |    |    |   |   |   |   |
| FN1429  |                        |                      |          |          |        | 7   |            | 7.9230   | AAL95622.1  Branched-chain amino acid transport ATP-binding protein livG            |                         |    |    |   |   |   |   |
|         |                        |                      |          |          |        |     |            |          |                                                                                     |                         |    |    |   |   |   |   |
| FN1432  | -1.094                 | 10.343               | 1.523e-3 | 4.298e-3 | 25     | 52  | 25.0000    | 58.8567  | AAL95625.1  Leucine-, isoleucine-, valine-, threonine-, and alanine-binding protein |                         |    |    |   |   |   |   |
|         |                        |                      |          |          | 19     | 38  | 24.3435    | 46.4487  |                                                                                     |                         |    |    |   |   |   |   |
| FN1433  | 0.426                  | 16.104               | 3.541e-3 | 1.202e-2 | 336    | 193 | 336.0000   | 218.4488 | AAL95626.1  Short chain dehydrogenase                                               |                         |    |    |   |   |   |   |
|         |                        |                      |          |          | 218    | 196 | 279.3102   | 239.5778 |                                                                                     |                         |    |    |   |   |   |   |
| FN1434  | -0.705                 | 13.570               | 1.409e-4 | 1.774e-4 | 92     | 117 | 92.0000    | 132.4275 | AAL95627.1  Tetratricopeptide repeat family protein                                 |                         |    |    |   |   |   |   |
|         |                        |                      |          |          | 63     | 122 | 80.7181    | 149.1249 |                                                                                     |                         |    |    |   |   |   |   |
| FN1437  | -0.930                 | 15.037               | 9.446e-5 | 9.988e-5 | 117    | 215 | 117.0000   | 243.3497 | AAL95630.1  LSU ribosomal protein L28P                                              |                         |    |    |   |   |   |   |
|         |                        |                      |          |          | 116    | 215 | 148.6238   | 262.8021 |                                                                                     |                         |    |    |   |   |   |   |
| FN1439  | -1.963                 | 11.632               | 1.338e-3 | 3.582e-3 | 34     | 81  | 34.0000    | 91.6806  | AAL95632.1  Transcriptional regulator, DeoR family                                  |                         |    |    |   |   |   |   |
|         |                        |                      |          |          | 18     | 107 | 23.0623    | 130.7899 |                                                                                     |                         |    |    |   |   |   |   |
| FN1440  | -1.580                 | 12.489               | 4.442e-4 | 8.573e-4 | 48     | 128 | 48.0000    | 144.8779 | AAL95633.1  1-phosphofructokinase                                                   |                         |    |    |   |   |   |   |
|         |                        |                      |          |          | 31     | 96  | 39.7184    | 117.3442 |                                                                                     |                         |    |    |   |   |   |   |
| FN1441  | -0.637                 | 14.817               | 4.58e-5  | 3.599e-5 | 129    | 195 | 129.0000   | 220.7125 | AAL95634.1  PTS system, fructose-specific IIABC component                           |                         |    |    |   |   |   |   |
|         |                        |                      |          |          | 112    | 166 | 143.4988   | 202.9077 |                                                                                     |                         |    |    |   |   |   |   |
| FN1444  | -0.271                 | 17.212               | 1.343e-3 | 3.603e-3 | 375    | 362 | 375.0000   | 409.7329 | AAL95637.1  GMP synthase (glutamine-hydrolyzing)                                    |                         |    |    |   |   |   |   |
|         |                        |                      |          |          | 261    | 365 | 334.4035   | 446.1525 |                                                                                     |                         |    |    |   |   |   |   |
| FN1445  | -1.001                 | 10.911               | 3.582e-3 | 1.218e-2 | 30     | 46  | 30.0000    | 52.0655  | AAL95638.1  DNA helicase                                                            |                         |    |    |   |   |   |   |
|         |                        |                      |          |          | 25     | 59  | 32.0310    | 72.1178  |                                                                                     |                         |    |    |   |   |   |   |
| FN1449  | -1.634                 | 17.044               | 1.317e-4 | 1.608e-4 | 165    | 560 | 165.0000   | 633.8410 | AAL95642.1  Fusobacterium outer membrane protein family                             |                         |    |    |   |   |   |   |
|         |                        |                      |          |          | 197    | 541 | 252.4042   | 661.2835 |                                                                                     |                         |    |    |   |   |   |   |
| FN1450  | -1.110                 | 7.929                | 2.511e-7 | 1.888e-8 | 11     | 20  | 11.0000    | 22.6372  | AAL95643.1  Integral membrane protein                                               |                         |    |    |   |   |   |   |
|         |                        |                      |          |          | 8      | 19  | 10.2499    | 23.2244  |                                                                                     |                         |    |    |   |   |   |   |

Show detected proteins only  
 Show all proteins  
 Filter by category:

Proteins found: 1297

Enter (or paste) list of ORFs

Find ORFs

Test Cutoff

q-Value p-Value

.005

| Signif | Direction | Applies To   |
|--------|-----------|--------------|
| yes    | +         | ratios, bars |
| no     | n/a       | bars         |
| yes    | -         | ratios, bars |
| yes    | +         | p-, q-Values |
| yes    | -         | p-, q-Values |

Dot Plots Dot Plots



| Protein | FnPgSg vs Fn           |                      |          |          | Raw    |     | Normalized |          | Description                                                                                     | Log <sub>2</sub> Ratios |    |    |   |   |   |   |
|---------|------------------------|----------------------|----------|----------|--------|-----|------------|----------|-------------------------------------------------------------------------------------------------|-------------------------|----|----|---|---|---|---|
|         | Log <sub>2</sub> Ratio | Log <sub>2</sub> Sum | q-Value  | p-Value  | FnPgSg | Fn  | FnPgSg     | Fn       |                                                                                                 | -6                      | -4 | -2 | 0 | 2 | 4 | 6 |
| FN1451  | -0.363                 | 14.291               | 5.929e-3 | 2.236e-2 | 110    | 139 | 110.0000   | 157.3284 | AAL95644.1  Cell division protein ftsZ                                                          |                         |    |    |   |   |   |   |
|         |                        |                      |          |          | 109    | 134 | 139.6551   | 163.7930 |                                                                                                 |                         |    |    |   |   |   |   |
| FN1452  | -0.615                 | 12.755               | 3.825e-3 | 1.319e-2 | 78     | 103 | 78.0000    | 116.5815 | AAL95645.1  Cell division protein ftsA                                                          |                         |    |    |   |   |   |   |
|         |                        |                      |          |          | 44     | 73  | 56.3745    | 89.2305  |                                                                                                 |                         |    |    |   |   |   |   |
| FN1454  | -0.302                 | 9.682                | 5.884e-3 | 2.216e-2 | 26     | 26  | 26.0000    | 29.4283  | AAL95647.1  D-alanine--D-alanine ligase                                                         |                         |    |    |   |   |   |   |
|         |                        |                      |          |          | 20     | 28  | 25.6248    | 34.2254  |                                                                                                 |                         |    |    |   |   |   |   |
| FN1455  | -0.511                 | 7.759                | 2.654e-2 | 1.245e-1 | 8      | 17  | 8.0000     | 19.2416  | AAL95648.1  UDP-N-acetylenolpyruvoylglucosamine reductase                                       |                         |    |    |   |   |   |   |
|         |                        |                      |          |          | 13     | 13  | 16.6561    | 15.8904  |                                                                                                 |                         |    |    |   |   |   |   |
| FN1456  | -0.648                 | 11.640               | 7.203e-4 | 1.583e-3 | 39     | 58  | 39.0000    | 65.6478  | AAL95649.1  UDP-N-acetylmuramate--alanine ligase                                                |                         |    |    |   |   |   |   |
|         |                        |                      |          |          | 40     | 62  | 51.2496    | 75.7848  |                                                                                                 |                         |    |    |   |   |   |   |
| FN1457  | -1.513                 | 10.302               | 3.401e-6 | 6.872e-7 | 19     | 51  | 19.0000    | 57.7248  | AAL95650.1  UDP-N-acetylglucosamine-N-acetylmuramyl-Pentapeptide pyrophosphoryl-undecaprenol N- |                         |    |    |   |   |   |   |
|         |                        |                      |          |          | 18     | 51  | 23.0623    | 62.3391  |                                                                                                 |                         |    |    |   |   |   |   |
| FN1458  | -0.832                 | 11.491               | 4.331e-5 | 3.325e-5 | 42     | 66  | 42.0000    | 74.7027  | AAL95651.1  UDP-N-acetylmuramoylalanine--D-glutamate ligase                                     |                         |    |    |   |   |   |   |
|         |                        |                      |          |          | 30     | 56  | 38.4372    | 68.4508  |                                                                                                 |                         |    |    |   |   |   |   |
| FN1459  |                        |                      |          |          |        |     |            |          | AAL95652.1  Phospho-N-acetylmuramoyl-pentapeptide-transferase                                   |                         |    |    |   |   |   |   |
|         |                        |                      |          |          |        | 12  |            | 14.6680  |                                                                                                 |                         |    |    |   |   |   |   |
| FN1461  | -1.278                 | 9.567                | 2.113e-4 | 3.16e-4  | 20     | 38  | 20.0000    | 43.0106  | AAL95654.1  Histidinol-phosphatase                                                              |                         |    |    |   |   |   |   |
|         |                        |                      |          |          | 12     | 35  | 15.3749    | 42.7817  |                                                                                                 |                         |    |    |   |   |   |   |
| FN1463  | 0.642                  | 16.865               | 5.185e-5 | 4.321e-5 | 448    | 236 | 448.0000   | 267.1187 | AAL95656.1  pyridoxine biosynthesis protein                                                     |                         |    |    |   |   |   |   |
|         |                        |                      |          |          | 324    | 234 | 415.1216   | 286.0265 |                                                                                                 |                         |    |    |   |   |   |   |
| FN1464  | -0.738                 | 14.970               | 2.936e-4 | 4.909e-4 | 125    | 209 | 125.0000   | 236.5585 | AAL95657.1  1-deoxyxylulose-5-phosphate synthase                                                |                         |    |    |   |   |   |   |
|         |                        |                      |          |          | 119    | 185 | 152.4675   | 226.1321 |                                                                                                 |                         |    |    |   |   |   |   |
| FN1470  | -0.032                 | 12.261               | 1.353e-1 | 7.919e-1 | 63     | 69  | 63.0000    | 78.0983  | AAL95663.1  Hypothetical protein                                                                |                         |    |    |   |   |   |   |
|         |                        |                      |          |          | 59     | 52  | 75.5931    | 63.5614  |                                                                                                 |                         |    |    |   |   |   |   |
| FN1471  | -1.454                 | 6.098                |          |          | 5      | 8   | 5.0000     | 9.0549   | AAL95664.1  LACI-family transcription regulator                                                 |                         |    |    |   |   |   |   |
|         |                        |                      |          |          |        | 15  |            | 18.3350  |                                                                                                 |                         |    |    |   |   |   |   |
| FN1472  | -1.228                 | 14.605               | 1.337e-3 | 3.577e-3 | 105    | 239 | 105.0000   | 270.5143 | AAL95665.1  N-acetylneuraminate-binding protein                                                 |                         |    |    |   |   |   |   |
|         |                        |                      |          |          | 79     | 174 | 101.2179   | 212.6864 |                                                                                                 |                         |    |    |   |   |   |   |
| FN1474  |                        |                      |          |          |        | 8   |            | 9.0549   | AAL95667.1  N-acetylmannosamine kinase                                                          |                         |    |    |   |   |   |   |
|         |                        |                      |          |          |        | 7   |            | 8.5563   |                                                                                                 |                         |    |    |   |   |   |   |
| FN1475  | 0.996                  | 12.046               | 9.879e-4 | 2.354e-3 | 103    | 36  | 103.0000   | 40.7469  | AAL95668.1  N-acetylneuraminate lyase                                                           |                         |    |    |   |   |   |   |
|         |                        |                      |          |          | 63     | 42  | 80.7181    | 51.3381  |                                                                                                 |                         |    |    |   |   |   |   |

Show detected proteins only  
 Show all proteins  
 Filter by category:

Proteins found: 1297

Enter (or paste) list of ORFs

Find ORFs

Test Cutoff

q-Value p-Value

.005

| Signif | Direction | Applies To   |
|--------|-----------|--------------|
| yes    | +         | ratios, bars |
| no     | n/a       | bars         |
| yes    | -         | ratios, bars |
| yes    | +         | p-, q-Values |
| yes    | -         | p-, q-Values |

Dot Plots Dot Plots

Fn Summary Table FnPg vs Fn FnSg vs Fn FnPgSg vs Fn FnPgSg vs FnPg FnSg vs FnPg FnPgSg vs FnSg Fn Coverage

| Protein | FnPgSg vs Fn           |                      |          |          | Raw    |     | Normalized |          | Description                                                          | Log <sub>2</sub> Ratios |    |    |   |   |   |   |
|---------|------------------------|----------------------|----------|----------|--------|-----|------------|----------|----------------------------------------------------------------------|-------------------------|----|----|---|---|---|---|
|         | Log <sub>2</sub> Ratio | Log <sub>2</sub> Sum | q-Value  | p-Value  | FnPgSg | Fn  | FnPgSg     | Fn       |                                                                      | -6                      | -4 | -2 | 0 | 2 | 4 | 6 |
| FN1476  | -0.949                 | 7.937                | 1.144e-7 | 4.624e-9 | 11     | 19  | 11.0000    | 21.5053  | AAL95669.1  N-acetylmannosamine-6-phosphate 2-epimerase              |                         |    |    |   |   |   |   |
|         |                        |                      |          |          | 9      | 18  | 11.5312    | 22.0020  |                                                                      |                         |    |    |   |   |   |   |
| FN1478  |                        |                      |          |          |        |     |            |          | AAL95671.1  Hypothetical protein                                     |                         |    |    |   |   |   |   |
|         |                        |                      |          |          | 9      |     | 11.5312    |          |                                                                      |                         |    |    |   |   |   |   |
| FN1479  | -0.809                 | 9.479                | 2.012e-3 | 6.102e-3 | 25     | 29  | 25.0000    | 32.8239  | AAL95672.1  Hypothetical protein                                     |                         |    |    |   |   |   |   |
|         |                        |                      |          |          | 12     | 31  | 15.3749    | 37.8924  |                                                                      |                         |    |    |   |   |   |   |
| FN1480  | -1.505                 | 6.871                | 1.481e-3 | 4.139e-3 | 9      | 16  | 9.0000     | 18.1097  | AAL95673.1  MG2+ transporter MGTE                                    |                         |    |    |   |   |   |   |
|         |                        |                      |          |          | 3      | 15  | 3.8437     | 18.3350  |                                                                      |                         |    |    |   |   |   |   |
| FN1481  | -0.802                 | 4.802                |          |          | 4      | 8   | 4.0000     | 9.0549   | AAL95674.1  Queuine tRNA-ribosyltransferase                          |                         |    |    |   |   |   |   |
|         |                        |                      |          |          |        | 4   |            | 4.8893   |                                                                      |                         |    |    |   |   |   |   |
| FN1482  | -1.728                 | 9.836                | 1.616e-3 | 4.647e-3 | 14     | 40  | 14.0000    | 45.2744  | AAL95675.1  Guanosine-3',5'-bis(Diphosphate) 3'-pyrophosphohydrolase |                         |    |    |   |   |   |   |
|         |                        |                      |          |          | 15     | 53  | 19.2186    | 64.7838  |                                                                      |                         |    |    |   |   |   |   |
| FN1483  | 0.263                  | 11.227               | 1.932e-3 | 5.818e-3 | 56     | 39  | 56.0000    | 44.1425  | AAL95676.1  Adenine phosphoribosyltransferase                        |                         |    |    |   |   |   |   |
|         |                        |                      |          |          | 40     | 37  | 51.2496    | 45.2264  |                                                                      |                         |    |    |   |   |   |   |
| FN1484  | -0.856                 | 6.553                | 8.42e-3  | 3.369e-2 | 8      | 9   | 8.0000     | 10.1867  | AAL95677.1  Tetratricopeptide repeat family protein                  |                         |    |    |   |   |   |   |
|         |                        |                      |          |          | 5      | 13  | 6.4062     | 15.8904  |                                                                      |                         |    |    |   |   |   |   |
| FN1486  | -0.555                 | 4.844                | 4.252e-3 | 1.502e-2 | 5      | 5   | 5.0000     | 5.6593   | AAL95679.1  magnesium and cobalt efflux protein CorC                 |                         |    |    |   |   |   |   |
|         |                        |                      |          |          | 3      | 6   | 3.8437     | 7.3340   |                                                                      |                         |    |    |   |   |   |   |
| FN1487  | -0.519                 | 15.287               | 6.114e-3 | 2.319e-2 | 197    | 207 | 197.0000   | 234.2948 | AAL95681.1  Chorismate mutase                                        |                         |    |    |   |   |   |   |
|         |                        |                      |          |          | 107    | 200 | 137.0926   | 244.4671 |                                                                      |                         |    |    |   |   |   |   |
| FN1488  |                        |                      |          |          | 11     |     | 11.0000    |          | AAL95682.1  Methylenetetrahydrofolate dehydrogenase (NADP+)          |                         |    |    |   |   |   |   |
|         |                        |                      |          |          | 10     |     | 12.8124    |          |                                                                      |                         |    |    |   |   |   |   |
| FN1489  | -1.776                 | 7.690                | 5.003e-4 | 1.001e-3 | 4      | 20  | 4.0000     | 22.6372  | AAL95683.1  Methionyl-tRNA formyltransferase                         |                         |    |    |   |   |   |   |
|         |                        |                      |          |          | 9      | 25  | 11.5312    | 30.5584  |                                                                      |                         |    |    |   |   |   |   |
| FN1490  | -0.449                 | 6.063                |          |          | 7      | 5   | 7.0000     | 5.6593   | AAL95684.1  putative regulatory protein                              |                         |    |    |   |   |   |   |
|         |                        |                      |          |          |        | 11  |            | 13.4457  |                                                                      |                         |    |    |   |   |   |   |
| FN1491  |                        |                      |          |          |        |     |            |          | AAL95685.1  PTS system, IIA component                                |                         |    |    |   |   |   |   |
|         |                        |                      |          |          |        | 16  |            | 19.5574  |                                                                      |                         |    |    |   |   |   |   |
| FN1493  |                        |                      |          |          |        | 23  |            | 26.0328  | AAL95687.1  Hypothetical protein                                     |                         |    |    |   |   |   |   |
|         |                        |                      |          |          |        | 14  |            | 17.1127  |                                                                      |                         |    |    |   |   |   |   |
| FN1494  | -1.044                 | 8.533                | 8.809e-7 | 1.048e-7 | 14     | 24  | 14.0000    | 27.1646  | AAL95680.1  Rod shape-determining protein mreC                       |                         |    |    |   |   |   |   |
|         |                        |                      |          |          | 10     | 23  | 12.8124    | 28.1137  |                                                                      |                         |    |    |   |   |   |   |

Show detected proteins only  
 Show all proteins  
 Filter by category:

Proteins found: 1297

Enter (or paste) list of ORFs

Find ORFs

Test Cutoff

q-Value p-Value

.005

| Signif | Direction | Applies To   |
|--------|-----------|--------------|
| yes    | +         | ratios, bars |
| no     | n/a       | bars         |
| yes    | -         | ratios, bars |
| yes    | +         | p-, q-Values |
| yes    | -         | p-, q-Values |

Dot Plots Dot Plots

| Protein | FnPgSg vs Fn           |                      |          |          | Raw    |     | Normalized |          | Description                                                       | Log <sub>2</sub> Ratios |    |    |   |   |   |   |
|---------|------------------------|----------------------|----------|----------|--------|-----|------------|----------|-------------------------------------------------------------------|-------------------------|----|----|---|---|---|---|
|         | Log <sub>2</sub> Ratio | Log <sub>2</sub> Sum | q-Value  | p-Value  | FnPgSg | Fn  | FnPgSg     | Fn       |                                                                   | -6                      | -4 | -2 | 0 | 2 | 4 | 6 |
| FN1496  | -1.044                 | 8.533                | 8.809e-7 | 1.048e-7 | 14     | 24  | 14.0000    | 27.1646  | AAL95680.1  Rod shape-determining protein mreC                    |                         |    |    |   |   |   |   |
|         |                        |                      |          |          | 10     | 23  | 12.8124    | 28.1137  |                                                                   |                         |    |    |   |   |   |   |
| FN1499  | 0.793                  | 12.833               | 1.634e-3 | 4.711e-3 | 98     | 65  | 98.0000    | 73.5708  | AAL93625.1  Cell surface protein                                  |                         |    |    |   |   |   |   |
|         |                        |                      |          |          | 99     | 46  | 126.8427   | 56.2274  |                                                                   |                         |    |    |   |   |   |   |
| FN1501  |                        |                      |          |          |        |     |            |          | AAL93627.1  Nickel transport ATP-binding protein nikD             |                         |    |    |   |   |   |   |
|         |                        |                      |          |          | 3      |     | 3.8437     |          |                                                                   |                         |    |    |   |   |   |   |
| FN1504  | -0.874                 | 14.292               | 9.725e-5 | 1.044e-4 | 117    | 179 | 117.0000   | 202.6028 | AAL93630.1  Nickel-binding protein                                |                         |    |    |   |   |   |   |
|         |                        |                      |          |          | 72     | 148 | 92.2492    | 180.9057 |                                                                   |                         |    |    |   |   |   |   |
| FN1505  | -0.776                 | 15.260               | 2.495e-4 | 3.975e-4 | 158    | 215 | 158.0000   | 243.3497 | AAL93631.1  6,7-dimethyl-8-ribityllumazine synthase               |                         |    |    |   |   |   |   |
|         |                        |                      |          |          | 113    | 225 | 144.7801   | 275.0255 |                                                                   |                         |    |    |   |   |   |   |
| FN1506  | 0.717                  | 7.719                |          |          | 18     | 10  | 18.0000    | 11.3186  | AAL93632.1  Diaminohydroxyphosphoribosylaminopyrimidine deaminase |                         |    |    |   |   |   |   |
|         |                        |                      |          |          | 15     |     | 19.2186    |          |                                                                   |                         |    |    |   |   |   |   |
| FN1508  | 0.624                  | 13.320               | 1.54e-4  | 1.998e-4 | 123    | 77  | 123.0000   | 87.1531  | AAL93634.1  GTP cyclohydrolase II                                 |                         |    |    |   |   |   |   |
|         |                        |                      |          |          | 100    | 62  | 128.1239   | 75.7848  |                                                                   |                         |    |    |   |   |   |   |
| FN1512  | -1.700                 | 5.249                | 5.512e-4 | 1.129e-3 | 3      | 11  | 3.0000     | 12.4504  | AAL93638.1  hypothetical exported 24-amino acid repeat protein    |                         |    |    |   |   |   |   |
|         |                        |                      |          |          | 3      | 8   | 3.8437     | 9.7787   |                                                                   |                         |    |    |   |   |   |   |
| FN1517  | -0.240                 | 15.926               | 1.464e-2 | 6.337e-2 | 235    | 262 | 235.0000   | 296.5470 | AAL93643.1  Leucyl-tRNA synthetase                                |                         |    |    |   |   |   |   |
|         |                        |                      |          |          | 175    | 201 | 224.2169   | 245.6894 |                                                                   |                         |    |    |   |   |   |   |
| FN1518  |                        |                      |          |          |        | 9   |            | 10.1867  | AAL93644.1  RNA polymerase sigma-H factor                         |                         |    |    |   |   |   |   |
|         |                        |                      |          |          |        | 6   |            | 7.3340   |                                                                   |                         |    |    |   |   |   |   |
| FN1519  | -0.052                 | 9.057                | 8.335e-2 | 4.58e-1  | 21     | 21  | 21.0000    | 23.7690  | AAL93645.1  23S rRNA methyltransferase                            |                         |    |    |   |   |   |   |
|         |                        |                      |          |          | 19     | 19  | 24.3435    | 23.2244  |                                                                   |                         |    |    |   |   |   |   |
| FN1520  | 0.821                  | 12.750               | 1.369e-3 | 3.704e-3 | 122    | 52  | 122.0000   | 58.8567  | AAL93646.1  UDP-N-acetylglucosamine 1-carboxyvinyltransferase     |                         |    |    |   |   |   |   |
|         |                        |                      |          |          | 77     | 54  | 98.6554    | 66.0061  |                                                                   |                         |    |    |   |   |   |   |
| FN1521  |                        |                      |          |          |        | 15  |            | 16.9779  | AAL93647.1  Dipeptide transport system permease protein dppB      |                         |    |    |   |   |   |   |
|         |                        |                      |          |          |        | 16  |            | 19.5574  |                                                                   |                         |    |    |   |   |   |   |
| FN1523  | -0.519                 | 16.339               | 1.033e-4 | 1.148e-4 | 253    | 299 | 253.0000   | 338.4258 | AAL93649.1  Dipeptide-binding protein                             |                         |    |    |   |   |   |   |
|         |                        |                      |          |          | 178    | 287 | 228.0606   | 350.8103 |                                                                   |                         |    |    |   |   |   |   |
| FN1524  |                        |                      |          |          |        | 5   |            | 5.6593   | AAL93650.1  Dipeptide transport ATP-binding protein dppD          |                         |    |    |   |   |   |   |
|         |                        |                      |          |          |        |     |            |          |                                                                   |                         |    |    |   |   |   |   |
| FN1525  | 0.442                  | 5.443                |          |          |        | 5   |            | 5.6593   | AAL93651.1  Dipeptide transport ATP-binding protein dppF          |                         |    |    |   |   |   |   |
|         |                        |                      |          |          | 6      |     | 7.6874     |          |                                                                   |                         |    |    |   |   |   |   |

Show detected proteins only  
 Show all proteins  
 Filter by category:

Proteins found: 1297

Enter (or paste) list of ORFs

Find ORFs

Test Cutoff

q-Value

p-Value

.005

| Signif | Direction | Applies To   |
|--------|-----------|--------------|
| yes    | +         | ratios, bars |
| no     | n/a       | bars         |
| yes    | -         | ratios, bars |
| yes    | +         | p-, q-Values |
| yes    | -         | p-, q-Values |

Dot Plots Dot Plots

Fn Summary Table

FnPg vs Fn

FnSg vs Fn

FnPgSg vs Fn

FnPgSg vs FnPg

FnSg vs FnPg

FnPgSg vs FnSg

Fn Coverage

| Protein | FnPgSg vs Fn           |                      |          |          | Raw    |      | Normalized |           | Description                                                                     | Log <sub>2</sub> Ratios |    |    |   |   |   |   |
|---------|------------------------|----------------------|----------|----------|--------|------|------------|-----------|---------------------------------------------------------------------------------|-------------------------|----|----|---|---|---|---|
|         | Log <sub>2</sub> Ratio | Log <sub>2</sub> Sum | q-Value  | p-Value  | FnPgSg | Fn   | FnPgSg     | Fn        |                                                                                 | -6                      | -4 | -2 | 0 | 2 | 4 | 6 |
| FN1526  | -0.638                 | 22.065               | 3.842e-4 | 7.109e-4 | 1491   | 2415 | 1491.0000  | 2733.4394 | AAL93652.1  Fusobacterium outer membrane protein family                         |                         |    |    |   |   |   |   |
|         |                        |                      |          |          | 1457   | 2039 | 1866.7659  | 2492.3421 |                                                                                 |                         |    |    |   |   |   |   |
| FN1527  | -0.874                 | 14.420               | 1.588e-4 | 2.084e-4 | 97     | 164  | 97.0000    | 185.6249  | AAL93653.1  Hypothetical protein                                                |                         |    |    |   |   |   |   |
|         |                        |                      |          |          | 95     | 176  | 121.7177   | 215.1310  |                                                                                 |                         |    |    |   |   |   |   |
| FN1528  | -0.950                 | 14.337               | 1.05e-3  | 2.551e-3 | 84     | 173  | 84.0000    | 195.8116  | AAL93654.1  Hypothetical protein                                                |                         |    |    |   |   |   |   |
|         |                        |                      |          |          | 96     | 167  | 122.9990   | 204.1300  |                                                                                 |                         |    |    |   |   |   |   |
| FN1529  | -0.438                 | 12.752               | 2.029e-2 | 9.178e-2 | 53     | 79   | 53.0000    | 89.4169   | AAL93655.1  Hypothetical protein                                                |                         |    |    |   |   |   |   |
|         |                        |                      |          |          | 70     | 85   | 89.6868    | 103.8985  |                                                                                 |                         |    |    |   |   |   |   |
| FN1531  | 0.821                  | 10.195               | 1.847e-2 | 8.262e-2 | 59     | 25   | 59.0000    | 28.2965   | AAL93657.1  murein hydrolase export regulator                                   |                         |    |    |   |   |   |   |
|         |                        |                      |          |          | 25     | 19   | 32.0310    | 23.2244   |                                                                                 |                         |    |    |   |   |   |   |
| FN1533  | 0.285                  | 18.751               | 1.004e-4 | 1.097e-4 | 744    | 534  | 744.0000   | 604.4127  | AAL93659.1  Electron transfer flavoprotein alpha-subunit                        |                         |    |    |   |   |   |   |
|         |                        |                      |          |          | 564    | 490  | 722.6190   | 598.9444  |                                                                                 |                         |    |    |   |   |   |   |
| FN1534  | 0.052                  | 19.332               | 8.7e-2   | 4.807e-1 | 868    | 657  | 868.0000   | 743.6313  | AAL93660.1  Electron transfer flavoprotein beta-subunit                         |                         |    |    |   |   |   |   |
|         |                        |                      |          |          | 614    | 697  | 786.6810   | 851.9678  |                                                                                 |                         |    |    |   |   |   |   |
| FN1535  | 0.258                  | 20.294               | 7.127e-4 | 1.563e-3 | 1208   | 873  | 1208.0000  | 988.1129  | AAL93661.1  Acyl-CoA dehydrogenase, short-chain specific                        |                         |    |    |   |   |   |   |
|         |                        |                      |          |          | 993    | 888  | 1272.2708  | 1085.4339 |                                                                                 |                         |    |    |   |   |   |   |
| FN1536  | 0.403                  | 17.709               | 1.128e-4 | 1.295e-4 | 539    | 369  | 539.0000   | 417.6560  | AAL93662.1  (S)-2-hydroxy-acid oxidase chain D                                  |                         |    |    |   |   |   |   |
|         |                        |                      |          |          | 410    | 317  | 525.3082   | 387.4804  |                                                                                 |                         |    |    |   |   |   |   |
| FN1537  |                        |                      |          |          |        | 4    |            | 4.5274    | AAL93663.1  Arsenical pump-driving ATPase                                       |                         |    |    |   |   |   |   |
|         |                        |                      |          |          |        | 11   |            | 13.4457   |                                                                                 |                         |    |    |   |   |   |   |
| FN1538  | -0.655                 | 6.995                |          |          | 9      | 11   | 9.0000     | 12.4504   | AAL93664.1  Arsenical pump-driving ATPase                                       |                         |    |    |   |   |   |   |
|         |                        |                      |          |          |        | 13   |            | 15.8904   |                                                                                 |                         |    |    |   |   |   |   |
| FN1539  | -0.327                 | 15.290               | 2.81e-4  | 4.633e-4 | 187    | 205  | 187.0000   | 232.0311  | AAL93665.1  Iron-sulfur cluster-binding protein                                 |                         |    |    |   |   |   |   |
|         |                        |                      |          |          | 133    | 177  | 170.4048   | 216.3534  |                                                                                 |                         |    |    |   |   |   |   |
| FN1540  | -0.732                 | 14.837               | 7.582e-5 | 7.271e-5 | 122    | 205  | 122.0000   | 232.0311  | AAL93666.1  Iron-sulfur cluster-binding protein                                 |                         |    |    |   |   |   |   |
|         |                        |                      |          |          | 112    | 171  | 143.4988   | 209.0194  |                                                                                 |                         |    |    |   |   |   |   |
| FN1544  | -0.117                 | 15.005               | 4.955e-2 | 2.56e-1  | 156    | 162  | 156.0000   | 183.3611  | AAL93670.1  Probable electron transfer flavoprotein-quinone oxidoreductase ydiS |                         |    |    |   |   |   |   |
|         |                        |                      |          |          | 150    | 159  | 192.1859   | 194.3513  |                                                                                 |                         |    |    |   |   |   |   |
| FN1545  | -0.225                 | 9.202                | 7.222e-2 | 3.895e-1 | 18     | 28   | 18.0000    | 31.6921   | AAL93671.1  Ferredoxin like protein                                             |                         |    |    |   |   |   |   |
|         |                        |                      |          |          | 21     | 17   | 26.9060    | 20.7797   |                                                                                 |                         |    |    |   |   |   |   |
| FN1546  | 0.606                  | 20.143               | 2.58e-4  | 4.147e-4 | 1330   | 730  | 1330.0000  | 826.2570  | AAL93672.1  Protein Translation Elongation Factor G (EF-G)                      |                         |    |    |   |   |   |   |
|         |                        |                      |          |          | 1034   | 751  | 1324.8016  | 917.9740  |                                                                                 |                         |    |    |   |   |   |   |

Show detected proteins only

Show all proteins

Filter by category:

GO: amino acid transport

Proteins found: 1297

Enter (or paste) list of ORFs

Find ORFs

Test Cutoff

q-Value p-Value

.005

| Signif | Direction | Applies To   |
|--------|-----------|--------------|
| yes    | +         | ratios, bars |
| no     | n/a       | bars         |
| yes    | -         | ratios, bars |
| yes    | +         | p-, q-Values |
| yes    | -         | p-, q-Values |

Dot Plots Dot Plots

| Protein | FnPgSg vs Fn           |                      |          |          | Raw    |      | Normalized |           | Description                                                          | Log <sub>2</sub> Ratios |    |    |   |   |   |   |
|---------|------------------------|----------------------|----------|----------|--------|------|------------|-----------|----------------------------------------------------------------------|-------------------------|----|----|---|---|---|---|
|         | Log <sub>2</sub> Ratio | Log <sub>2</sub> Sum | q-Value  | p-Value  | FnPgSg | Fn   | FnPgSg     | Fn        |                                                                      | -6                      | -4 | -2 | 0 | 2 | 4 | 6 |
| FN1547  | -0.316                 | 14.795               | 3.208e-5 | 1.915e-5 | 151    | 165  | 151.0000   | 186.7567  | AAL93673.1  PTS permease for N-acetylglucosamine and glucose         |                         |    |    |   |   |   |   |
|         |                        |                      |          |          | 118    | 155  | 151.1863   | 189.4620  |                                                                      |                         |    |    |   |   |   |   |
| FN1548  | 0.477                  | 10.804               | 3.204e-2 | 1.553e-1 | 37     | 32   | 37.0000    | 36.2195   | AAL93674.1  Hypothetical protein                                     |                         |    |    |   |   |   |   |
|         |                        |                      |          |          | 49     | 29   | 62.7807    | 35.4477   |                                                                      |                         |    |    |   |   |   |   |
| FN1549  | 0.343                  | 19.753               | 2.978e-3 | 9.795e-3 | 1019   | 667  | 1019.0000  | 754.9499  | AAL93675.1  Stomatin like protein                                    |                         |    |    |   |   |   |   |
|         |                        |                      |          |          | 857    | 748  | 1098.0222  | 914.3070  |                                                                      |                         |    |    |   |   |   |   |
| FN1552  |                        |                      |          |          |        | 12   |            | 13.5823   | AAL93678.1  abortive phage resistance protein                        |                         |    |    |   |   |   |   |
|         |                        |                      |          |          |        | 12   |            | 14.6680   |                                                                      |                         |    |    |   |   |   |   |
| FN1553  | -0.038                 | 8.779                | 1.476e-1 | 8.762e-1 | 26     | 17   | 26.0000    | 19.2416   | AAL93679.1  abortive phage resistance protein                        |                         |    |    |   |   |   |   |
|         |                        |                      |          |          | 12     | 19   | 15.3749    | 23.2244   |                                                                      |                         |    |    |   |   |   |   |
| FN1554  | -0.953                 | 16.471               | 3.379e-4 | 5.945e-4 | 195    | 337  | 195.0000   | 381.4365  | AAL93680.1  Fusobacterium outer membrane protein family              |                         |    |    |   |   |   |   |
|         |                        |                      |          |          | 186    | 374  | 238.3105   | 457.1535  |                                                                      |                         |    |    |   |   |   |   |
| FN1555  | 0.494                  | 24.054               | 7.898e-6 | 2.287e-6 | 5050   | 3198 | 5050.0000  | 3619.6849 | AAL93681.1  Protein Translation Elongation Factor Tu                 |                         |    |    |   |   |   |   |
|         |                        |                      |          |          | 3790   | 2792 | 4855.8975  | 3412.7607 |                                                                      |                         |    |    |   |   |   |   |
| FN1556  | 0.097                  | 20.934               | 2.3e-2   | 1.057e-1 | 1392   | 1210 | 1392.0000  | 1369.5493 | AAL93682.1  Protein Translation Elongation Factor G (EF-G)           |                         |    |    |   |   |   |   |
|         |                        |                      |          |          | 1199   | 1119 | 1536.2061  | 1367.7934 |                                                                      |                         |    |    |   |   |   |   |
| FN1557  | 2.045                  | 14.967               | 9.541e-5 | 1.014e-4 | 381    | 79   | 381.0000   | 89.4169   | AAL93683.1  SSU ribosomal protein S7P                                |                         |    |    |   |   |   |   |
|         |                        |                      |          |          | 270    | 71   | 345.9346   | 86.7858   |                                                                      |                         |    |    |   |   |   |   |
| FN1558  |                        |                      |          |          |        |      |            |           | AAL93684.1  SSU ribosomal protein S12P                               |                         |    |    |   |   |   |   |
|         |                        |                      |          |          | 83     |      | 106.3429   |           |                                                                      |                         |    |    |   |   |   |   |
| FN1560  | -0.656                 | 13.653               | 1.924e-4 | 2.739e-4 | 86     | 133  | 86.0000    | 150.5372  | AAL93686.1  unknown                                                  |                         |    |    |   |   |   |   |
|         |                        |                      |          |          | 74     | 110  | 94.8117    | 134.4569  |                                                                      |                         |    |    |   |   |   |   |
| FN1562  | -1.550                 | 6.194                |          |          | 5      | 14   | 5.0000     | 15.8460   | AAL93688.1  Phospho-2-dehydro-3-deoxyheptonate aldolase              |                         |    |    |   |   |   |   |
|         |                        |                      |          |          |        | 11   |            | 13.4457   |                                                                      |                         |    |    |   |   |   |   |
| FN1577  | -0.079                 | 14.568               | 3.613e-2 | 1.788e-1 | 152    | 134  | 152.0000   | 151.6691  | AAL93692.1  Rod shape-determining protein mreB                       |                         |    |    |   |   |   |   |
|         |                        |                      |          |          | 118    | 138  | 151.1863   | 168.6823  |                                                                      |                         |    |    |   |   |   |   |
| FN1579  | -0.459                 | 12.170               | 4.335e-3 | 1.539e-2 | 62     | 78   | 62.0000    | 88.2850   | AAL93694.1  CysteinyI-tRNA synthetase                                |                         |    |    |   |   |   |   |
|         |                        |                      |          |          | 42     | 58   | 53.8121    | 70.8955   |                                                                      |                         |    |    |   |   |   |   |
| FN1580  |                        |                      |          |          |        | 6    |            | 6.7912    | AAL93695.1  2-C-methyl-D-erythritol 4-phosphate cytidylyltransferase |                         |    |    |   |   |   |   |
|         |                        |                      |          |          |        |      |            |           |                                                                      |                         |    |    |   |   |   |   |
| FN1581  | -0.610                 | 10.586               | 4.59e-3  | 1.647e-2 | 34     | 37   | 34.0000    | 41.8788   | AAL93696.1  DNA mismatch repair protein mutS                         |                         |    |    |   |   |   |   |
|         |                        |                      |          |          | 23     | 45   | 29.4685    | 55.0051   |                                                                      |                         |    |    |   |   |   |   |

Show detected proteins only  
 Show all proteins  
 Filter by category:

Proteins found: 1297

Enter (or paste) list of ORFs

Find ORFs

Test Cutoff

q-Value p-Value

.005

| Signif | Direction | Applies To   |
|--------|-----------|--------------|
| yes    | +         | ratios, bars |
| no     | n/a       | bars         |
| yes    | -         | ratios, bars |
| yes    | +         | p-, q-Values |
| yes    | -         | p-, q-Values |

Dot Plots Dot Plots

Fn Summary Table FnPg vs Fn FnSg vs Fn FnPgSg vs Fn FnPgSg vs FnPg FnSg vs FnPg FnPgSg vs FnSg Fn Coverage

| Protein | FnPgSg vs Fn           |                      |          |          | Raw    |      | Normalized |           | Description                                                      | Log <sub>2</sub> Ratios |    |    |   |   |   |   |
|---------|------------------------|----------------------|----------|----------|--------|------|------------|-----------|------------------------------------------------------------------|-------------------------|----|----|---|---|---|---|
|         | Log <sub>2</sub> Ratio | Log <sub>2</sub> Sum | q-Value  | p-Value  | FnPgSg | Fn   | FnPgSg     | Fn        |                                                                  | -6                      | -4 | -2 | 0 | 2 | 4 | 6 |
| FN1582  |                        |                      |          |          |        | 11   |            | 13.4457   | AAL93697.1  Hypothetical protein                                 |                         |    |    |   |   |   |   |
| FN1589  | -1.276                 | 9.956                | 2.001e-3 | 6.064e-3 | 20     | 37   | 20.0000    | 41.8788   | AAL93704.1  LexA repressor                                       |                         |    |    |   |   |   |   |
| FN1591  | -0.438                 | 15.917               | 1.34e-4  | 1.648e-4 | 202    | 247  | 202.0000   | 279.5692  | AAL93706.1  RNFB-related protein                                 |                         |    |    |   |   |   |   |
| FN1592  |                        |                      |          |          |        |      |            |           | AAL93707.1  Na(+)-translocating NADH-quinone reductase subunit D |                         |    |    |   |   |   |   |
| FN1594  | 0.815                  | 12.225               | 3.051e-5 | 1.748e-5 | 90     | 49   | 90.0000    | 55.4611   | AAL93709.1  Nitrogen fixation protein RNFG                       |                         |    |    |   |   |   |   |
| FN1595  | 0.443                  | 14.395               | 9.011e-4 | 2.09e-3  | 177    | 121  | 177.0000   | 136.9549  | AAL93710.1  Na(+)-translocating NADH-quinone reductase subunit B |                         |    |    |   |   |   |   |
| FN1596  | -0.538                 | 19.910               | 1.288e-3 | 3.388e-3 | 748    | 1055 | 748.0000   | 1194.1112 | AAL93711.1  Nitrogen fixation iron-sulphur protein RNFC          |                         |    |    |   |   |   |   |
| FN1597  | -1.886                 | 5.886                |          |          | 4      | 11   | 4.0000     | 12.4504   | AAL93712.1  Peptidyl-tRNA hydrolase                              |                         |    |    |   |   |   |   |
| FN1600  |                        |                      |          |          |        |      |            | 6.7912    | AAL93715.1  tRNA pseudouridine synthase A                        |                         |    |    |   |   |   |   |
| FN1601  |                        |                      |          |          |        |      |            | 4.8893    | AAL93716.1  Hypothetical cytosolic protein                       |                         |    |    |   |   |   |   |
| FN1602  |                        |                      |          |          |        |      |            | 5.1250    | AAL93717.1  Hypothetical cytosolic protein                       |                         |    |    |   |   |   |   |
| FN1603  | -1.777                 | 7.171                | 2.058e-4 | 3.034e-4 | 4      | 22   | 4.0000     | 24.9009   | AAL93718.1  2',3'-cyclic nucleotide 3'-phosphodiesterase         |                         |    |    |   |   |   |   |
| FN1605  | -0.533                 | 16.299               | 3.651e-4 | 6.636e-4 | 239    | 314  | 239.0000   | 355.4037  | AAL93720.1  Adenylosuccinate synthetase                          |                         |    |    |   |   |   |   |
| FN1606  | -1.934                 | 9.616                | 5.688e-6 | 1.373e-6 | 12     | 46   | 12.0000    | 52.0655   | AAL93721.1  3-deoxy-D-manno-octulosonic-acid transferase         |                         |    |    |   |   |   |   |
| FN1607  | -1.077                 | 7.792                |          |          |        | 22   |            | 24.9009   | AAL93722.1  Cytidylate kinase                                    |                         |    |    |   |   |   |   |
| FN1609  | -3.843                 | 7.843                |          |          | 4      | 55   | 4.0000     | 62.2522   | AAL93724.1  Hypothetical protein                                 |                         |    |    |   |   |   |   |

Show detected proteins only  
 Show all proteins  
 Filter by category:

Proteins found: 1297

Enter (or paste) list of ORFs

Find ORFs

Test Cutoff

q-Value

p-Value

.005

| Signif | Direction | Applies To   |
|--------|-----------|--------------|
| yes    | +         | ratios, bars |
| no     | n/a       | bars         |
| yes    | -         | ratios, bars |
| yes    | +         | p-, q-Values |
| yes    | -         | p-, q-Values |

Dot Plots Dot Plots

Fn Summary Table FnPg vs Fn FnSg vs Fn FnPgSg vs Fn FnPgSg vs FnPg FnSg vs FnPg FnPgSg vs FnSg Fn Coverage

| Protein | FnPgSg vs Fn           |                      |          |          | Raw    |      | Normalized |           | Description                                          | Log <sub>2</sub> Ratios |    |    |   |   |   |   |
|---------|------------------------|----------------------|----------|----------|--------|------|------------|-----------|------------------------------------------------------|-------------------------|----|----|---|---|---|---|
|         | Log <sub>2</sub> Ratio | Log <sub>2</sub> Sum | q-Value  | p-Value  | FnPgSg | Fn   | FnPgSg     | Fn        |                                                      | -6                      | -4 | -2 | 0 | 2 | 4 | 6 |
| FN1610  | -0.837                 | 8.135                | 3.9e-4   | 7.255e-4 | 11     | 18   | 11.0000    | 20.3735   | AAL93725.1  33 kDa chaperonin                        |                         |    |    |   |   |   |   |
|         |                        |                      |          |          | 11     | 20   | 14.0936    | 24.4467   |                                                      | ■                       |    |    |   |   |   |   |
| FN1611  |                        |                      |          |          |        |      |            |           | AAL93726.1  Competence protein                       |                         |    |    |   |   |   |   |
|         |                        |                      |          |          |        | 3    |            | 3.6670    |                                                      |                         |    |    |   |   |   |   |
| FN1613  | -0.131                 | 8.589                | 3.769e-2 | 1.877e-1 | 17     | 19   | 17.0000    | 21.5053   | AAL93728.1  Hypothetical protein                     |                         |    |    |   |   |   |   |
|         |                        |                      |          |          | 16     | 16   | 20.4998    | 19.5574   |                                                      |                         |    |    |   |   |   |   |
| FN1614  | -0.923                 | 9.380                | 6.385e-3 | 2.443e-2 | 17     | 25   | 17.0000    | 28.2965   | AAL93729.1  MG(2+) chelatase family protein          |                         |    |    |   |   |   |   |
|         |                        |                      |          |          | 16     | 35   | 20.4998    | 42.7817   |                                                      | ■                       |    |    |   |   |   |   |
| FN1616  | 1.703                  | 9.788                | 1.199e-2 | 5.059e-2 | 74     | 14   | 74.0000    | 15.8460   | AAL93731.1  N utilization substance protein B        |                         |    |    |   |   |   |   |
|         |                        |                      |          |          | 26     | 14   | 33.3122    | 17.1127   |                                                      | ■                       |    |    |   |   |   |   |
| FN1618  | 0.513                  | 10.595               | 1.399e-3 | 3.82e-3  | 44     | 29   | 44.0000    | 32.8239   | AAL93733.1  Hypothetical protein                     |                         |    |    |   |   |   |   |
|         |                        |                      |          |          | 39     | 27   | 49.9683    | 33.0031   |                                                      | ■                       |    |    |   |   |   |   |
| FN1619  | 1.804                  | 14.923               | 1.135e-3 | 2.836e-3 | 282    | 90   | 282.0000   | 101.8673  | AAL93734.1  Hypothetical cytosolic protein           |                         |    |    |   |   |   |   |
|         |                        |                      |          |          | 294    | 71   | 376.6844   | 86.7858   |                                                      | ■                       |    |    |   |   |   |   |
| FN1620  | -0.186                 | 18.736               | 7.55e-3  | 2.966e-2 | 624    | 589  | 624.0000   | 666.6649  | AAL93735.1  SSU ribosomal protein S2P                |                         |    |    |   |   |   |   |
|         |                        |                      |          |          | 480    | 608  | 614.9949   | 743.1800  |                                                      |                         |    |    |   |   |   |   |
| FN1621  | -0.264                 | 21.085               | 1.658e-2 | 7.3e-2   | 1181   | 1389 | 1181.0000  | 1572.1521 | AAL93736.1  Protein Translation Elongation Factor Ts |                         |    |    |   |   |   |   |
|         |                        |                      |          |          | 1203   | 1388 | 1541.3311  | 1696.6017 |                                                      |                         |    |    |   |   |   |   |
| FN1622  | -0.173                 | 15.566               | 1.593e-2 | 6.974e-2 | 224    | 207  | 224.0000   | 234.2948  | AAL93737.1  Uridylate kinase                         |                         |    |    |   |   |   |   |
|         |                        |                      |          |          | 149    | 191  | 190.9047   | 233.4661  |                                                      |                         |    |    |   |   |   |   |
| FN1623  | -0.657                 | 12.842               | 3.933e-3 | 1.364e-2 | 66     | 107  | 66.0000    | 121.1089  | AAL93738.1  Ribosome Recycling Factor (RRF)          |                         |    |    |   |   |   |   |
|         |                        |                      |          |          | 55     | 77   | 70.4682    | 94.1198   |                                                      | ■                       |    |    |   |   |   |   |
| FN1624  | -0.341                 | 12.388               | 6.462e-4 | 1.384e-3 | 66     | 70   | 66.0000    | 79.2301   | AAL93739.1  Protein translocase subunit secY         |                         |    |    |   |   |   |   |
|         |                        |                      |          |          | 50     | 70   | 64.0620    | 85.5635   |                                                      | ■                       |    |    |   |   |   |   |
| FN1625  | -0.387                 | 14.085               | 1.329e-3 | 3.546e-3 | 114    | 140  | 114.0000   | 158.4603  | AAL93740.1  LSU ribosomal protein L15P               |                         |    |    |   |   |   |   |
|         |                        |                      |          |          | 91     | 117  | 116.5928   | 143.0133  |                                                      | ■                       |    |    |   |   |   |   |
| FN1626  | -0.900                 | 11.987               | 7.562e-5 | 7.244e-5 | 51     | 75   | 51.0000    | 84.8894   | AAL93741.1  LSU ribosomal protein L30P               |                         |    |    |   |   |   |   |
|         |                        |                      |          |          | 33     | 73   | 42.2809    | 89.2305   |                                                      | ■                       |    |    |   |   |   |   |
| FN1627  | 0.508                  | 18.203               | 1.979e-2 | 8.923e-2 | 791    | 397  | 791.0000   | 449.3480  | AAL93742.1  SSU ribosomal protein S5P                |                         |    |    |   |   |   |   |
|         |                        |                      |          |          | 405    | 386  | 518.9020   | 471.8215  |                                                      |                         |    |    |   |   |   |   |
| FN1628  | 0.274                  | 15.172               | 3.376e-2 | 1.653e-1 | 242    | 177  | 242.0000   | 200.3390  | AAL93743.1  LSU ribosomal protein L18P               |                         |    |    |   |   |   |   |
|         |                        |                      |          |          | 141    | 122  | 180.6548   | 149.1249  |                                                      |                         |    |    |   |   |   |   |

Show detected proteins only  
 Show all proteins  
 Filter by category:

Proteins found: 1297

Test Cutoff

| Signif | Direction | Applies To |
|--------|-----------|------------|
| ■      | yes       | +          |
| ■      | no        | n/a        |
| ■      | yes       | -          |
| ■      | yes       | +          |
| ■      | yes       | -          |

Applies To: ratios, bars; bars; ratios, bars; p-, q-Values

| Protein | FnPgSg vs Fn           |                      |          |          | Raw    |     | Normalized |          | Description                            | Log <sub>2</sub> Ratios |    |    |   |   |   |   |
|---------|------------------------|----------------------|----------|----------|--------|-----|------------|----------|----------------------------------------|-------------------------|----|----|---|---|---|---|
|         | Log <sub>2</sub> Ratio | Log <sub>2</sub> Sum | q-Value  | p-Value  | FnPgSg | Fn  | FnPgSg     | Fn       |                                        | -6                      | -4 | -2 | 0 | 2 | 4 | 6 |
| FN1629  | -1.235                 | 17.092               | 1.41e-5  | 5.192e-6 | 217    | 524 | 217.0000   | 593.0941 | AAL93744.1  LSU ribosomal protein L6P  |                         |    |    |   |   |   |   |
|         |                        |                      |          |          | 211    | 453 | 270.3415   | 553.7180 |                                        |                         |    |    |   |   |   |   |
| FN1630  | 0.382                  | 14.101               | 6.248e-2 | 3.316e-1 | 204    | 108 | 204.0000   | 122.2408 | AAL93745.1  SSU ribosomal protein S8P  |                         |    |    |   |   |   |   |
|         |                        |                      |          |          | 77     | 90  | 98.6554    | 110.0102 |                                        |                         |    |    |   |   |   |   |
| FN1631  | 1.383                  | 8.384                |          |          | 27     | 10  | 27.0000    | 11.3186  | AAL93746.1  SSU ribosomal protein S14P |                         |    |    |   |   |   |   |
|         |                        |                      |          |          | 25     |     | 32.0310    |          |                                        |                         |    |    |   |   |   |   |
| FN1632  | -0.245                 | 17.018               | 1.921e-3 | 5.772e-3 | 326    | 367 | 326.0000   | 415.3922 | AAL93747.1  LSU ribosomal protein L5P  |                         |    |    |   |   |   |   |
|         |                        |                      |          |          | 268    | 309 | 343.3722   | 377.7017 |                                        |                         |    |    |   |   |   |   |
| FN1634  | 0.349                  | 10.575               | 2.107e-2 | 9.573e-2 | 51     | 32  | 51.0000    | 36.2195  | AAL93749.1  LSU ribosomal protein L24P |                         |    |    |   |   |   |   |
|         |                        |                      |          |          | 29     | 27  | 37.1559    | 33.0031  |                                        |                         |    |    |   |   |   |   |
| FN1635  | 0.958                  | 11.759               | 4.306e-3 | 1.526e-2 | 68     | 39  | 68.0000    | 44.1425  | AAL93750.1  LSU ribosomal protein L14P |                         |    |    |   |   |   |   |
|         |                        |                      |          |          | 75     | 33  | 96.0930    | 40.3371  |                                        |                         |    |    |   |   |   |   |
| FN1636  | -1.114                 | 11.264               | 2.879e-3 | 9.391e-3 | 29     | 76  | 29.0000    | 86.0213  | AAL93751.1  SSU ribosomal protein S17P |                         |    |    |   |   |   |   |
|         |                        |                      |          |          | 30     | 49  | 38.4372    | 59.8944  |                                        |                         |    |    |   |   |   |   |
| FN1637  | -0.289                 | 10.697               | 1.072e-1 | 6.077e-1 | 34     | 18  | 34.0000    | 20.3735  | AAL93752.1  LSU ribosomal protein L29P |                         |    |    |   |   |   |   |
|         |                        |                      |          |          | 31     | 57  | 39.7184    | 69.6731  |                                        |                         |    |    |   |   |   |   |
| FN1638  | -0.088                 | 16.494               | 2.375e-2 | 1.096e-1 | 292    | 264 | 292.0000   | 298.8108 | AAL93753.1  LSU ribosomal protein L16P |                         |    |    |   |   |   |   |
|         |                        |                      |          |          | 232    | 268 | 297.2476   | 327.5859 |                                        |                         |    |    |   |   |   |   |
| FN1639  | 0.286                  | 19.945               | 1.71e-2  | 7.562e-2 | 1241   | 778 | 1241.0000  | 880.5863 | AAL93754.1  SSU ribosomal protein S3P  |                         |    |    |   |   |   |   |
|         |                        |                      |          |          | 763    | 768 | 977.5857   | 938.7537 |                                        |                         |    |    |   |   |   |   |
| FN1640  | 1.630                  | 15.969               | 1.477e-3 | 4.125e-3 | 380    | 128 | 380.0000   | 144.8779 | AAL93755.1  LSU ribosomal protein L22P |                         |    |    |   |   |   |   |
|         |                        |                      |          |          | 399    | 117 | 511.2145   | 143.0133 |                                        |                         |    |    |   |   |   |   |
| FN1641  | -0.028                 | 15.694               | 1.364e-1 | 7.991e-1 | 246    | 225 | 246.0000   | 254.6683 | AAL93756.1  SSU ribosomal protein S19P |                         |    |    |   |   |   |   |
|         |                        |                      |          |          | 164    | 172 | 210.1233   | 210.2417 |                                        |                         |    |    |   |   |   |   |
| FN1642  | -1.107                 | 16.915               | 2.324e-4 | 3.626e-4 | 233    | 429 | 233.0000   | 485.5675 | AAL93757.1  LSU ribosomal protein L2P  |                         |    |    |   |   |   |   |
|         |                        |                      |          |          | 192    | 447 | 245.9980   | 546.3840 |                                        |                         |    |    |   |   |   |   |
| FN1643  | -0.010                 | 12.933               | 1.377e-1 | 8.084e-1 | 84     | 78  | 84.0000    | 88.2850  | AAL93758.1  LSU ribosomal protein L23P |                         |    |    |   |   |   |   |
|         |                        |                      |          |          | 72     | 73  | 92.2492    | 89.2305  |                                        |                         |    |    |   |   |   |   |
| FN1644  | 0.360                  | 20.141               | 3.73e-5  | 2.586e-5 | 1202   | 862 | 1202.0000  | 975.6624 | AAL93759.1  LSU ribosomal protein L1E  |                         |    |    |   |   |   |   |
|         |                        |                      |          |          | 963    | 755 | 1233.8336  | 922.8633 |                                        |                         |    |    |   |   |   |   |
| FN1645  | 0.481                  | 18.801               | 1.256e-4 | 1.503e-4 | 764    | 528 | 764.0000   | 597.6215 | AAL93760.1  LSU ribosomal protein L3P  |                         |    |    |   |   |   |   |
|         |                        |                      |          |          | 650    | 447 | 832.8056   | 546.3840 |                                        |                         |    |    |   |   |   |   |

Show detected proteins only  
 Show all proteins  
 Filter by category:

Proteins found: 1297

Test Cutoff

| Signif | Direction | Applies To   |
|--------|-----------|--------------|
| yes    | +         | ratios, bars |
| no     | n/a       | bars         |
| yes    | -         | ratios, bars |
| yes    | +         | p-, q-Values |
| yes    | -         |              |



Fn Summary Table FnPg vs Fn FnSg vs Fn FnPgSg vs Fn FnPgSg vs FnPg FnSg vs FnPg FnPgSg vs FnSg Fn Coverage

| Protein | FnPgSg vs Fn           |                      |          |          | Raw    |     | Normalized |          | Description                                   | Log <sub>2</sub> Ratios |    |    |   |   |   |   |
|---------|------------------------|----------------------|----------|----------|--------|-----|------------|----------|-----------------------------------------------|-------------------------|----|----|---|---|---|---|
|         | Log <sub>2</sub> Ratio | Log <sub>2</sub> Sum | q-Value  | p-Value  | FnPgSg | Fn  | FnPgSg     | Fn       |                                               | -6                      | -4 | -2 | 0 | 2 | 4 | 6 |
| FN1646  | -0.451                 | 15.567               | 4.517e-3 | 1.616e-2 | 163    | 223 | 163.0000   | 252.4045 | AAL93761.1  SSU ribosomal protein S10P        |                         |    |    |   |   |   |   |
|         |                        |                      |          |          | 167    | 215 | 213.9670   | 262.8021 |                                               |                         |    |    |   |   |   |   |
| FN1647  | 0.273                  | 17.449               | 3.025e-2 | 1.451e-1 | 530    | 384 | 530.0000   | 434.6338 | AAL93762.1  Hypothetical protein              |                         |    |    |   |   |   |   |
|         |                        |                      |          |          | 312    | 274 | 399.7467   | 334.9199 |                                               |                         |    |    |   |   |   |   |
| FN1652  | -1.164                 | 14.047               | 4.821e-5 | 3.877e-5 | 88     | 167 | 88.0000    | 189.0204 | AAL93767.1  Oligopeptide-binding protein oppA |                         |    |    |   |   |   |   |
|         |                        |                      |          |          | 67     | 164 | 85.8430    | 200.4630 |                                               |                         |    |    |   |   |   |   |
| FN1654  | 0.302                  | 9.947                | 1.47e-2  | 6.368e-2 | 39     | 23  | 39.0000    | 26.0328  | AAL93769.1  Hypothetical protein              |                         |    |    |   |   |   |   |
|         |                        |                      |          |          | 24     | 25  | 30.7497    | 30.5584  |                                               |                         |    |    |   |   |   |   |
| FN1655  | -1.198                 | 11.651               | 1.272e-6 | 1.857e-7 | 39     | 74  | 39.0000    | 83.7576  | AAL93770.1  Hypothetical cytosolic protein    |                         |    |    |   |   |   |   |
|         |                        |                      |          |          | 28     | 72  | 35.8747    | 88.0082  |                                               |                         |    |    |   |   |   |   |
| FN1656  |                        |                      |          |          | 21     |     | 21.0000    |          | AAL93771.1  SSU ribosomal protein S18P        |                         |    |    |   |   |   |   |
|         |                        |                      |          |          | 27     |     | 34.5935    |          |                                               |                         |    |    |   |   |   |   |
| FN1657  | -1.602                 | 13.685               | 6.451e-5 | 5.802e-5 | 60     | 188 | 60.0000    | 212.7895 | AAL93772.1  SSU ribosomal protein S6P         |                         |    |    |   |   |   |   |
|         |                        |                      |          |          | 56     | 153 | 71.7494    | 187.0173 |                                               |                         |    |    |   |   |   |   |
| FN1658  | 0.034                  | 15.275               | 1.224e-1 | 7.062e-1 | 189    | 188 | 189.0000   | 212.7895 | AAL93773.1  Prolyl-tRNA synthetase            |                         |    |    |   |   |   |   |
|         |                        |                      |          |          | 167    | 148 | 213.9670   | 180.9057 |                                               |                         |    |    |   |   |   |   |
| FN1660  |                        |                      |          |          |        |     |            |          | AAL93775.1  ATP-dependent DNA helicase recG   |                         |    |    |   |   |   |   |
|         |                        |                      |          |          |        | 4   |            | 4.8893   |                                               |                         |    |    |   |   |   |   |
| FN1661  | -0.035                 | 10.939               | 1.472e-1 | 8.735e-1 | 44     | 49  | 44.0000    | 55.4611  | AAL93776.1  Hypothetical cytosolic protein    |                         |    |    |   |   |   |   |
|         |                        |                      |          |          | 34     | 28  | 43.5621    | 34.2254  |                                               |                         |    |    |   |   |   |   |
| FN1662  | -0.570                 | 9.943                | 6.345e-3 | 2.424e-2 | 31     | 33  | 31.0000    | 37.3513  | AAL93777.1  Hypothetical protein              |                         |    |    |   |   |   |   |
|         |                        |                      |          |          | 16     | 32  | 20.4998    | 39.1147  |                                               |                         |    |    |   |   |   |   |
| FN1663  | 0.687                  | 7.648                | 8.592e-6 | 2.604e-6 | 18     | 10  | 18.0000    | 11.3186  | AAL93778.1  Hypothetical protein              |                         |    |    |   |   |   |   |
|         |                        |                      |          |          | 14     | 9   | 17.9374    | 11.0010  |                                               |                         |    |    |   |   |   |   |
| FN1666  |                        |                      |          |          |        |     |            |          | AAL93781.1  Hypothetical protein              |                         |    |    |   |   |   |   |
|         |                        |                      |          |          |        | 3   |            | 3.6670   |                                               |                         |    |    |   |   |   |   |
| FN1670  | -1.431                 | 10.553               | 5.101e-5 | 4.216e-5 | 28     | 52  | 28.0000    | 58.8567  | AAL93785.1  Choline kinase                    |                         |    |    |   |   |   |   |
|         |                        |                      |          |          | 15     | 56  | 19.2186    | 68.4508  |                                               |                         |    |    |   |   |   |   |
| FN1671  |                        |                      |          |          |        | 5   |            | 5.6593   | AAL93786.1  hypothetical exported protein     |                         |    |    |   |   |   |   |
|         |                        |                      |          |          |        | 4   |            | 4.8893   |                                               |                         |    |    |   |   |   |   |
| FN1679  | 0.061                  | 16.695               | 9.283e-2 | 5.17e-1  | 354    | 258 | 354.0000   | 292.0196 | AAL93794.1  LPS biosynthesis protein WbpG     |                         |    |    |   |   |   |   |
|         |                        |                      |          |          | 243    | 283 | 311.3412   | 345.9209 |                                               |                         |    |    |   |   |   |   |

Show detected proteins only  
 Show all proteins  
 Filter by category:

Proteins found: 1297

Enter (or paste) list of ORFs

Find ORFs

Test Cutoff

q-Value

p-Value

.005

| Signif | Direction | Applies To   |
|--------|-----------|--------------|
| yes    | +         | ratios, bars |
| no     | n/a       | bars         |
| yes    | -         | ratios, bars |
| yes    | +         | p-, q-Values |
| yes    | -         | p-, q-Values |

Dot Plots

Fn Summary Table FnPg vs Fn FnSg vs Fn FnPgSg vs Fn FnPgSg vs FnPg FnSg vs FnPg FnPgSg vs FnSg Fn Coverage

| Protein | FnPgSg vs Fn           |                      |          |          | Raw    |     | Normalized |          | Description                                                     | Log <sub>2</sub> Ratios |    |    |   |   |
|---------|------------------------|----------------------|----------|----------|--------|-----|------------|----------|-----------------------------------------------------------------|-------------------------|----|----|---|---|
|         | Log <sub>2</sub> Ratio | Log <sub>2</sub> Sum | q-Value  | p-Value  | FnPgSg | Fn  | FnPgSg     | Fn       |                                                                 | -6                      | -4 | -2 | 0 | 2 |
| FN1683  | -1.101                 | 12.498               | 1.248e-3 | 3.237e-3 | 68     | 91  | 68.0000    | 102.9992 | AAL93798.1  Acetyltransferase                                   |                         |    |    |   |   |
|         |                        |                      |          |          | 28     | 98  | 35.8747    | 119.7889 |                                                                 | ■                       |    |    |   |   |
| FN1684  | 0.149                  | 16.554               | 8.54e-3  | 3.426e-2 | 311    | 257 | 311.0000   | 290.8878 | AAL93799.1  N-acetylneuraminate synthase                        |                         |    |    |   |   |
|         |                        |                      |          |          | 267    | 244 | 342.0909   | 298.2499 |                                                                 |                         |    |    |   |   |
| FN1685  | -0.397                 | 11.898               | 1.175e-2 | 4.947e-2 | 50     | 54  | 50.0000    | 61.1204  | AAL93800.1  dTDP-4-dehydrorhamnose reductase                    |                         |    |    |   |   |
|         |                        |                      |          |          | 45     | 66  | 57.6558    | 80.6741  |                                                                 | ■                       |    |    |   |   |
| FN1686  | 0.065                  | 15.493               | 1.181e-1 | 6.782e-1 | 256    | 182 | 256.0000   | 205.9983 | AAL93801.1  Spore coat polysaccharide biosynthesis protein spsF |                         |    |    |   |   |
|         |                        |                      |          |          | 143    | 175 | 183.2172   | 213.9087 |                                                                 |                         |    |    |   |   |
| FN1687  | -0.132                 | 15.420               | 7.712e-2 | 4.193e-1 | 222    | 221 | 222.0000   | 250.1408 | AAL93802.1  Gluconate 5-dehydrogenase                           |                         |    |    |   |   |
|         |                        |                      |          |          | 139    | 154 | 178.0923   | 188.2397 |                                                                 | ■                       |    |    |   |   |
| FN1688  | 0.776                  | 12.314               | 4.389e-5 | 3.388e-5 | 92     | 51  | 92.0000    | 57.7248  | AAL93803.1  Oxidoreductase                                      |                         |    |    |   |   |
|         |                        |                      |          |          | 74     | 42  | 94.8117    | 51.3381  |                                                                 | ■                       |    |    |   |   |
| FN1689  | -0.178                 | 18.102               | 1.501e-3 | 4.217e-3 | 494    | 484 | 494.0000   | 547.8197 | AAL93804.1  UDP-N-acetylglucosamine 4,6-dehydratase             |                         |    |    |   |   |
|         |                        |                      |          |          | 393    | 475 | 503.5271   | 580.6094 |                                                                 | ■                       |    |    |   |   |
| FN1690  | -1.672                 | 10.587               | 3.332e-5 | 2.057e-5 | 26     | 60  | 26.0000    | 67.9115  | AAL93805.1  Hypothetical protein                                |                         |    |    |   |   |
|         |                        |                      |          |          | 14     | 59  | 17.9374    | 72.1178  |                                                                 | ■                       |    |    |   |   |
| FN1692  | -0.883                 | 11.575               | 7.625e-3 | 3e-2     | 57     | 71  | 57.0000    | 80.3620  | AAL93807.1  Glycosyl transferase                                |                         |    |    |   |   |
|         |                        |                      |          |          | 19     | 57  | 24.3435    | 69.6731  |                                                                 | ■                       |    |    |   |   |
| FN1693  | -0.112                 | 8.271                | 1.084e-1 | 6.151e-1 | 21     | 15  | 21.0000    | 16.9779  | AAL93808.1  Hypothetical protein                                |                         |    |    |   |   |
|         |                        |                      |          |          | 10     | 16  | 12.8124    | 19.5574  |                                                                 | ■                       |    |    |   |   |
| FN1694  | -0.393                 | 13.401               | 3.491e-5 | 2.253e-5 | 88     | 108 | 88.0000    | 122.2408 | AAL93809.1  UDP-N-acetyl-D-quinovosamine 4-epimerase            |                         |    |    |   |   |
|         |                        |                      |          |          | 73     | 95  | 93.5305    | 116.1219 |                                                                 | ■                       |    |    |   |   |
| FN1695  | 0.292                  | 10.167               | 2.494e-2 | 1.159e-1 | 43     | 25  | 43.0000    | 28.2965  | AAL93810.1  Probable quinovosaminephosphotransferase            |                         |    |    |   |   |
|         |                        |                      |          |          | 25     | 27  | 32.0310    | 33.0031  |                                                                 | ■                       |    |    |   |   |
| FN1696  | -0.144                 | 14.664               | 1.379e-2 | 5.92e-2  | 163    | 147 | 163.0000   | 166.3833 | AAL93811.1  UDP-N-acetylglucosamine 4,6-dehydratase             |                         |    |    |   |   |
|         |                        |                      |          |          | 112    | 141 | 143.4988   | 172.3493 |                                                                 | ■                       |    |    |   |   |
| FN1697  | -1.167                 | 13.721               | 6.157e-4 | 1.301e-3 | 68     | 136 | 68.0000    | 153.9328 | AAL93812.1  Hypothetical protein                                |                         |    |    |   |   |
|         |                        |                      |          |          | 68     | 159 | 87.1243    | 194.3513 |                                                                 | ■                       |    |    |   |   |
| FN1698  | -0.074                 | 12.875               | 1.006e-1 | 5.662e-1 | 78     | 88  | 78.0000    | 99.6036  | AAL93813.1  dTDP-4-dehydrorhamnose reductase                    |                         |    |    |   |   |
|         |                        |                      |          |          | 71     | 64  | 90.9680    | 78.2295  |                                                                 | ■                       |    |    |   |   |
| FN1700  |                        |                      |          |          |        | 9   |            | 11.0010  | AAL93815.1  Hypothetical protein                                |                         |    |    |   |   |
|         |                        |                      |          |          |        |     |            |          |                                                                 |                         |    |    |   |   |

Show detected proteins only  
 Show all proteins  
 Filter by category:

Proteins found: 1297

Enter (or paste) list of ORFs

Find ORFs

Test Cutoff

q-Value

p-Value

.005

| Signif | Direction | Applies To   |
|--------|-----------|--------------|
| ■      | yes +     | ratios, bars |
| ■      | no n/a    | bars         |
| ■      | yes -     | ratios, bars |
| ■      | yes +     | p-, q-Values |
| ■      | yes -     | p-, q-Values |

Dot Plots Dot Plots

Fn Summary Table FnPg vs Fn FnSg vs Fn FnPgSg vs Fn FnPgSg vs FnPg FnSg vs FnPg FnPgSg vs FnSg Fn Coverage

| Protein | FnPgSg vs Fn           |                      |          |          | Raw    |     | Normalized |          | Description                                           | Log <sub>2</sub> Ratios |    |    |   |   |   |   |
|---------|------------------------|----------------------|----------|----------|--------|-----|------------|----------|-------------------------------------------------------|-------------------------|----|----|---|---|---|---|
|         | Log <sub>2</sub> Ratio | Log <sub>2</sub> Sum | q-Value  | p-Value  | FnPgSg | Fn  | FnPgSg     | Fn       |                                                       | -6                      | -4 | -2 | 0 | 2 | 4 | 6 |
| FN1701  | -1.255                 | 10.774               | 1.84e-5  | 8.057e-6 | 26     | 57  | 26.0000    | 64.5160  | AAL93816.1  ABC transporter ATP-binding protein       |                         |    |    |   |   |   |   |
|         |                        |                      |          |          | 22     | 53  | 28.1873    | 64.7838  |                                                       |                         |    |    |   |   |   |   |
| FN1703  | -0.918                 | 13.513               | 3.033e-5 | 1.73e-5  | 74     | 133 | 74.0000    | 150.5372 | AAL93818.1  ADP-L-glycero-D-manno-heptose-6-epimerase |                         |    |    |   |   |   |   |
|         |                        |                      |          |          | 65     | 120 | 83.2806    | 146.6803 |                                                       |                         |    |    |   |   |   |   |
| FN1704  | -1.512                 | 7.127                |          |          | 7      | 18  | 7.0000     | 20.3735  | AAL93819.1  Serine protease                           |                         |    |    |   |   |   |   |
|         |                        |                      |          |          |        | 16  |            | 19.5574  |                                                       |                         |    |    |   |   |   |   |
| FN1707  |                        |                      |          |          |        | 7   |            | 7.9230   | AAL93822.1  Aldose 1-epimerase                        |                         |    |    |   |   |   |   |
|         |                        |                      |          |          |        | 4   |            | 4.8893   |                                                       |                         |    |    |   |   |   |   |
| FN1708  | -0.504                 | 18.437               | 5.877e-6 | 1.441e-6 | 488    | 634 | 488.0000   | 717.5986 | AAL93823.1  Polyribonucleotide nucleotidyltransferase |                         |    |    |   |   |   |   |
|         |                        |                      |          |          | 400    | 574 | 512.4958   | 701.6206 |                                                       |                         |    |    |   |   |   |   |
| FN1711  | -2.157                 | 5.706                | 2.347e-6 | 4.111e-7 | 3      | 14  | 3.0000     | 15.8460  | AAL93826.1  Methyltransferase                         |                         |    |    |   |   |   |   |
|         |                        |                      |          |          | 3      | 12  | 3.8437     | 14.6680  |                                                       |                         |    |    |   |   |   |   |
| FN1713  |                        |                      |          |          |        |     |            |          | AAL93828.1  tRNA (Uracil-5-) -methyltransferase       |                         |    |    |   |   |   |   |
|         |                        |                      |          |          |        | 6   |            | 7.3340   |                                                       |                         |    |    |   |   |   |   |
| FN1717  | -2.442                 | 9.822                | 2.502e-4 | 3.989e-4 | 13     | 57  | 13.0000    | 64.5160  | AAL93832.1  NAD-dependent DNA ligase                  |                         |    |    |   |   |   |   |
|         |                        |                      |          |          | 10     | 62  | 12.8124    | 75.7848  |                                                       |                         |    |    |   |   |   |   |
| FN1718  | -0.953                 | 17.908               | 2.743e-4 | 4.488e-4 | 372    | 569 | 372.0000   | 644.0277 | AAL93833.1  Protein translocase subunit secA          |                         |    |    |   |   |   |   |
|         |                        |                      |          |          | 266    | 602 | 340.8097   | 735.8460 |                                                       |                         |    |    |   |   |   |   |
| FN1719  | -0.715                 | 16.583               | 3.33e-5  | 2.054e-5 | 261    | 341 | 261.0000   | 385.9639 | AAL93834.1  Hypothetical protein                      |                         |    |    |   |   |   |   |
|         |                        |                      |          |          | 178    | 341 | 228.0606   | 416.8164 |                                                       |                         |    |    |   |   |   |   |
| FN1722  |                        |                      |          |          |        | 7   |            | 7.9230   | AAL93837.1  Glucose inhibited division protein B      |                         |    |    |   |   |   |   |
|         |                        |                      |          |          |        | 4   |            | 4.8893   |                                                       |                         |    |    |   |   |   |   |
| FN1723  | -0.389                 | 13.184               | 8.235e-3 | 3.282e-2 | 93     | 86  | 93.0000    | 97.3399  | AAL93838.1  Glucose inhibited division protein A      |                         |    |    |   |   |   |   |
|         |                        |                      |          |          | 59     | 101 | 75.5931    | 123.4559 |                                                       |                         |    |    |   |   |   |   |
| FN1724  | -0.577                 | 6.699                |          |          | 9      | 11  | 9.0000     | 12.4504  | AAL93839.1  Potassium uptake protein KtrA             |                         |    |    |   |   |   |   |
|         |                        |                      |          |          | 6      |     | 7.6874     |          |                                                       |                         |    |    |   |   |   |   |
| FN1727  |                        |                      |          |          | 4      |     | 4.0000     |          | AAL93842.1  Chloride channel protein                  |                         |    |    |   |   |   |   |
|         |                        |                      |          |          | 4      |     | 5.1250     |          |                                                       |                         |    |    |   |   |   |   |
| FN1728  | -1.893                 | 6.917                | 2.063e-6 | 3.481e-7 | 5      | 18  | 5.0000     | 20.3735  | AAL93843.1  Pyrrolidone-carboxylate peptidase         |                         |    |    |   |   |   |   |
|         |                        |                      |          |          | 5      | 18  | 6.4062     | 22.0020  |                                                       |                         |    |    |   |   |   |   |
| FN1730  | -1.332                 | 7.217                |          |          |        | 18  |            | 20.3735  | AAL93845.1  Para-aminobenzoate synthase component I   |                         |    |    |   |   |   |   |
|         |                        |                      |          |          | 6      | 15  | 7.6874     | 18.3350  |                                                       |                         |    |    |   |   |   |   |

Show detected proteins only  
 Show all proteins  
 Filter by category:

Proteins found: 1297

Enter (or paste) list of ORFs

Find ORFs

Test Cutoff

q-Value p-Value

.005

| Signif | Direction | Applies To   |
|--------|-----------|--------------|
| yes    | +         | ratios, bars |
| no     | n/a       | bars         |
| yes    | -         | ratios, bars |
| yes    | +         | p-, q-Values |
| yes    | -         | p-, q-Values |

Dot Plots Dot Plots

Fn Summary Table FnPg vs Fn FnSg vs Fn FnPgSg vs Fn FnPgSg vs FnPg FnSg vs FnPg FnPgSg vs FnSg Fn Coverage

| Protein | FnPgSg vs Fn           |                      |          |          | Raw    |      | Normalized |           | Description                                      | Log <sub>2</sub> Ratios |    |    |   |   |   |   |
|---------|------------------------|----------------------|----------|----------|--------|------|------------|-----------|--------------------------------------------------|-------------------------|----|----|---|---|---|---|
|         | Log <sub>2</sub> Ratio | Log <sub>2</sub> Sum | q-Value  | p-Value  | FnPgSg | Fn   | FnPgSg     | Fn        |                                                  | -6                      | -4 | -2 | 0 | 2 | 4 | 6 |
| FN1731  |                        |                      |          |          | 16     |      | 16.0000    |           | AAL93846.1  Anthranilate synthase component II   |                         |    |    |   |   |   |   |
| FN1732  | -0.305                 | 8.862                | 6.336e-2 | 3.367e-1 | 26     | 24   | 26.0000    | 27.1646   | AAL93847.1  Hypothetical protein                 |                         |    |    |   |   |   |   |
|         |                        |                      |          |          | 10     | 17   | 12.8124    | 20.7797   |                                                  |                         |    |    |   |   |   |   |
| FN1734  | 0.282                  | 13.552               | 2.984e-2 | 1.427e-1 | 102    | 86   | 102.0000   | 97.3399   | AAL93849.1  V-type sodium ATP synthase subunit B |                         |    |    |   |   |   |   |
|         |                        |                      |          |          | 109    | 83   | 139.6551   | 101.4538  |                                                  |                         |    |    |   |   |   |   |
| FN1735  | -0.552                 | 11.297               | 1.147e-3 | 2.875e-3 | 38     | 49   | 38.0000    | 55.4611   | AAL93850.1  V-type sodium ATP synthase subunit A |                         |    |    |   |   |   |   |
|         |                        |                      |          |          | 35     | 54   | 44.8434    | 66.0061   |                                                  |                         |    |    |   |   |   |   |
| FN1736  | -0.692                 | 6.687                | 3.585e-4 | 6.464e-4 | 7      | 12   | 7.0000     | 13.5823   | AAL93851.1  V-type sodium ATP synthase subunit A |                         |    |    |   |   |   |   |
|         |                        |                      |          |          | 7      | 10   | 8.9687     | 12.2234   |                                                  |                         |    |    |   |   |   |   |
| FN1737  |                        |                      |          |          |        | 5    |            | 5.6593    | AAL93852.1  V-type sodium ATP synthase subunit G |                         |    |    |   |   |   |   |
|         |                        |                      |          |          |        | 9    |            | 11.0010   |                                                  |                         |    |    |   |   |   |   |
| FN1738  | -0.713                 | 8.155                | 3.759e-3 | 1.291e-2 | 11     | 22   | 11.0000    | 24.9009   | AAL93853.1  V-type sodium ATP synthase subunit C |                         |    |    |   |   |   |   |
|         |                        |                      |          |          | 12     | 15   | 15.3749    | 18.3350   |                                                  |                         |    |    |   |   |   |   |
| FN1739  | 1.461                  | 6.684                |          |          | 17     |      | 17.0000    |           | AAL93854.1  V-type sodium ATP synthase subunit E |                         |    |    |   |   |   |   |
|         |                        |                      |          |          | 13     | 5    | 16.6561    | 6.1117    |                                                  |                         |    |    |   |   |   |   |
| FN1741  | -1.416                 | 6.966                | 4.968e-5 | 4.052e-5 | 6      | 15   | 6.0000     | 16.9779   | AAL93856.1  V-type sodium ATP synthase subunit I |                         |    |    |   |   |   |   |
|         |                        |                      |          |          | 6      | 16   | 7.6874     | 19.5574   |                                                  |                         |    |    |   |   |   |   |
| FN1745  | 0.611                  | 5.434                | 2.23e-2  | 1.021e-1 | 6      | 4    | 6.0000     | 4.5274    | AAL93860.1  Cystathionine gamma-synthase         |                         |    |    |   |   |   |   |
|         |                        |                      |          |          | 8      | 5    | 10.2499    | 6.1117    |                                                  |                         |    |    |   |   |   |   |
| FN1752  |                        |                      |          |          | 3      |      | 3.0000     |           | AAL93867.1  Regulatory protein TENI              |                         |    |    |   |   |   |   |
| FN1763  | -0.243                 | 7.602                |          |          |        | 16   |            | 18.1097   | AAL93876.1  Hypothetical cytosolic protein       |                         |    |    |   |   |   |   |
|         |                        |                      |          |          | 10     | 10   | 12.8124    | 12.2234   |                                                  |                         |    |    |   |   |   |   |
| FN1764  | -0.224                 | 23.234               | 2.337e-4 | 3.655e-4 | 2954   | 3002 | 2954.0000  | 3397.8406 | AAL93877.1  Enolase                              |                         |    |    |   |   |   |   |
|         |                        |                      |          |          | 2231   | 2773 | 2858.4452  | 3389.5364 |                                                  |                         |    |    |   |   |   |   |
| FN1765  | -0.880                 | 19.371               | 5.355e-5 | 4.511e-5 | 563    | 933  | 563.0000   | 1056.0244 | AAL93878.1  Pyruvate kinase                      |                         |    |    |   |   |   |   |
|         |                        |                      |          |          | 508    | 964  | 650.8696   | 1178.3314 |                                                  |                         |    |    |   |   |   |   |
| FN1780  | -0.124                 | 9.621                | 7.404e-2 | 4.005e-1 | 23     | 28   | 23.0000    | 31.6921   | AAL93879.1  Hypothetical protein                 |                         |    |    |   |   |   |   |
|         |                        |                      |          |          | 24     | 22   | 30.7497    | 26.8914   |                                                  |                         |    |    |   |   |   |   |
| FN1781  | -0.570                 | 18.459               | 1.946e-4 | 2.787e-4 | 496    | 666  | 496.0000   | 753.8181  | AAL93880.1  LytB protein                         |                         |    |    |   |   |   |   |
|         |                        |                      |          |          | 382    | 580  | 489.4335   | 708.9546  |                                                  |                         |    |    |   |   |   |   |

Show detected proteins only  
 Show all proteins  
 Filter by category:

Proteins found: 1297

Enter (or paste) list of ORFs

Find ORFs

Test Cutoff

q-Value p-Value

.005

| Signif | Direction | Applies To   |
|--------|-----------|--------------|
| yes    | +         | ratios, bars |
| no     | n/a       | bars         |
| yes    | -         | ratios, bars |
| yes    | +         | p-, q-Values |
| yes    | -         | p-, q-Values |

Dot Plots Dot Plots

Fn Summary Table FnPg vs Fn FnSg vs Fn FnPgSg vs Fn FnPgSg vs FnPg FnSg vs FnPg FnPgSg vs FnSg Fn Coverage

| Protein | FnPgSg vs Fn           |                      |          |          | Raw    |      | Normalized |           | Description                                                              | Log <sub>2</sub> Ratios |    |    |   |   |   |   |
|---------|------------------------|----------------------|----------|----------|--------|------|------------|-----------|--------------------------------------------------------------------------|-------------------------|----|----|---|---|---|---|
|         | Log <sub>2</sub> Ratio | Log <sub>2</sub> Sum | q-Value  | p-Value  | FnPgSg | Fn   | FnPgSg     | Fn        |                                                                          | -6                      | -4 | -2 | 0 | 2 | 4 | 6 |
| FN1784  | -2.082                 | 7.441                |          |          |        | 22   |            | 24.9009   | AAL93883.1  unknown                                                      |                         |    |    |   |   |   |   |
|         |                        |                      |          |          | 5      | 24   | 6.4062     | 29.3361   |                                                                          | ■                       |    |    |   |   |   |   |
| FN1785  | 0.622                  | 10.161               | 4.805e-2 | 2.473e-1 | 25     | 32   | 25.0000    | 36.2195   | AAL93884.1  Hypothetical protein                                         |                         |    |    |   |   |   |   |
|         |                        |                      |          |          | 46     | 15   | 58.9370    | 18.3350   |                                                                          | ■                       |    |    |   |   |   |   |
| FN1786  | -0.317                 | 11.942               | 6.397e-4 | 1.366e-3 | 56     | 60   | 56.0000    | 67.9115   | AAL93885.1  ADP-heptose synthase                                         |                         |    |    |   |   |   |   |
|         |                        |                      |          |          | 44     | 59   | 56.3745    | 72.1178   |                                                                          | ■                       |    |    |   |   |   |   |
| FN1787  | -1.042                 | 11.114               | 1.322e-3 | 3.521e-3 | 40     | 60   | 40.0000    | 67.9115   | AAL93886.1  Tetratricopeptide repeat family protein                      |                         |    |    |   |   |   |   |
|         |                        |                      |          |          | 20     | 55   | 25.6248    | 67.2285   |                                                                          | ■                       |    |    |   |   |   |   |
| FN1788  | 0.133                  | 9.007                | 7.27e-2  | 3.924e-1 | 27     | 21   | 27.0000    | 23.7690   | AAL93887.1  2C-methyl-D-erythritol 2,4-cyclodiphosphate synthase         |                         |    |    |   |   |   |   |
|         |                        |                      |          |          | 16     | 16   | 20.4998    | 19.5574   |                                                                          |                         |    |    |   |   |   |   |
| FN1790  | 1.328                  | 5.077                |          |          | 12     |      | 12.0000    |           | AAL93889.1  Cob(I)alamin adenosyltransferase                             |                         |    |    |   |   |   |   |
|         |                        |                      |          |          | 5      | 3    | 6.4062     | 3.6670    |                                                                          | ■                       |    |    |   |   |   |   |
| FN1792  | 2.062                  | 24.088               | 8.106e-9 | 5.46e-11 | 8681   | 1765 | 8681.0000  | 1997.7310 | AAL93891.1  Hypothetical protein                                         |                         |    |    |   |   |   |   |
|         |                        |                      |          |          | 6695   | 1746 | 8577.8981  | 2134.1978 |                                                                          | ■                       |    |    |   |   |   |   |
| FN1793  | -0.653                 | 13.634               | 8.342e-5 | 8.319e-5 | 85     | 131  | 85.0000    | 148.2735  | AAL93892.1  Phosphoenolpyruvate-protein phosphotransferase               |                         |    |    |   |   |   |   |
|         |                        |                      |          |          | 74     | 110  | 94.8117    | 134.4569  |                                                                          | ■                       |    |    |   |   |   |   |
| FN1794  | -0.325                 | 14.614               | 2.967e-2 | 1.418e-1 | 110    | 148  | 110.0000   | 167.5151  | AAL93893.1  Phosphocarrier protein HPr                                   |                         |    |    |   |   |   |   |
|         |                        |                      |          |          | 135    | 153  | 172.9673   | 187.0173  |                                                                          | ■                       |    |    |   |   |   |   |
| FN1796  |                        |                      |          |          |        |      |            |           | AAL93895.1  unknown                                                      |                         |    |    |   |   |   |   |
|         |                        |                      |          |          |        | 5    |            | 6.1117    |                                                                          |                         |    |    |   |   |   |   |
| FN1797  | -1.666                 | 11.284               | 1.595e-5 | 6.328e-6 | 33     | 74   | 33.0000    | 83.7576   | AAL93896.1  Spermidine/putrescine transport ATP-binding protein potA     |                         |    |    |   |   |   |   |
|         |                        |                      |          |          | 18     | 77   | 23.0623    | 94.1198   |                                                                          | ■                       |    |    |   |   |   |   |
| FN1798  | -1.273                 | 6.225                |          |          | 6      |      | 6.0000     |           | AAL93897.1  Spermidine/putrescine transport system permease protein potB |                         |    |    |   |   |   |   |
|         |                        |                      |          |          | 4      | 11   | 5.1250     | 13.4457   |                                                                          | ■                       |    |    |   |   |   |   |
| FN1800  | -0.311                 | 14.924               | 9.349e-3 | 3.815e-2 | 177    | 172  | 177.0000   | 194.6797  | AAL93899.1  Peptidyl-prolyl cis-trans isomerase                          |                         |    |    |   |   |   |   |
|         |                        |                      |          |          | 109    | 162  | 139.6551   | 198.0184  |                                                                          | ■                       |    |    |   |   |   |   |
| FN1801  | -0.652                 | 6.267                |          |          | 7      |      | 7.0000     |           | AAL93900.1  Sodium/glutamate symport carrier protein                     |                         |    |    |   |   |   |   |
|         |                        |                      |          |          |        | 9    |            | 11.0010   |                                                                          | ■                       |    |    |   |   |   |   |
| FN1803  | 1.473                  | 7.445                |          |          | 22     | 7    | 22.0000    | 7.9230    | AAL93902.1  Transcriptional regulator, TetR family                       |                         |    |    |   |   |   |   |
|         |                        |                      |          |          |        |      |            |           |                                                                          | ■                       |    |    |   |   |   |   |
| FN1804  |                        |                      |          |          |        | 11   |            | 12.4504   | AAL93903.1  Aminoacyl-histidine dipeptidase                              |                         |    |    |   |   |   |   |
|         |                        |                      |          |          |        | 10   |            | 12.2234   |                                                                          |                         |    |    |   |   |   |   |

Show detected proteins only  
 Show all proteins  
 Filter by category:

Proteins found: 1297

Enter (or paste) list of ORFs

Find ORFs

Test Cutoff

q-Value p-Value

.005

| Signif | Direction | Applies To   |
|--------|-----------|--------------|
| ■      | yes +     | ratios, bars |
| ■      | no n/a    | bars         |
| ■      | yes -     | ratios, bars |
| ■      | yes +     | p-, q-Values |
| ■      | yes -     | p-, q-Values |

Dot Plots Dot Plots

Fn Summary Table FnPg vs Fn FnSg vs Fn FnPgSg vs Fn FnPgSg vs FnPg FnSg vs FnPg FnPgSg vs FnSg Fn Coverage

| Protein | FnPgSg vs Fn           |                      |          |          | Raw    |     | Normalized |          | Description                                                     | Log <sub>2</sub> Ratios |    |    |   |   |   |   |
|---------|------------------------|----------------------|----------|----------|--------|-----|------------|----------|-----------------------------------------------------------------|-------------------------|----|----|---|---|---|---|
|         | Log <sub>2</sub> Ratio | Log <sub>2</sub> Sum | q-Value  | p-Value  | FnPgSg | Fn  | FnPgSg     | Fn       |                                                                 | -6                      | -4 | -2 | 0 | 2 | 4 | 6 |
| FN1807  | 0.029                  | 17.351               | 5.788e-2 | 3.049e-1 | 407    | 348 | 407.0000   | 393.8869 | AAL93906.1  Hypothetical protein                                |                         |    |    |   |   |   |   |
|         |                        |                      |          |          | 327    | 340 | 418.9653   | 415.5941 |                                                                 |                         |    |    |   |   |   |   |
| FN1808  | -1.913                 | 11.762               | 3.078e-4 | 5.231e-4 | 30     | 93  | 30.0000    | 105.2629 | AAL93907.1  Hypothetical protein                                |                         |    |    |   |   |   |   |
|         |                        |                      |          |          | 24     | 101 | 30.7497    | 123.4559 |                                                                 |                         |    |    |   |   |   |   |
| FN1809  | 0.257                  | 8.951                | 5.993e-2 | 3.168e-1 | 23     | 23  | 23.0000    | 26.0328  | AAL93908.1  Iron/zinc/copper-binding protein                    |                         |    |    |   |   |   |   |
|         |                        |                      |          |          | 20     | 12  | 25.6248    | 14.6680  |                                                                 |                         |    |    |   |   |   |   |
| FN1811  | -1.648                 | 10.922               | 3.729e-5 | 2.584e-5 | 19     | 73  | 19.0000    | 82.6257  | AAL93910.1  Manganese transport system ATP-binding protein mntA |                         |    |    |   |   |   |   |
|         |                        |                      |          |          | 24     | 60  | 30.7497    | 73.3401  |                                                                 |                         |    |    |   |   |   |   |
| FN1812  | -0.884                 | 14.299               | 1.088e-4 | 1.234e-4 | 95     | 167 | 95.0000    | 189.0204 | AAL93911.1  Manganese-binding protein                           |                         |    |    |   |   |   |   |
|         |                        |                      |          |          | 89     | 161 | 114.0303   | 196.7960 |                                                                 |                         |    |    |   |   |   |   |
| FN1813  | -1.315                 | 9.374                | 1.684e-4 | 2.261e-4 | 16     | 34  | 16.0000    | 38.4832  | AAL93912.1  Manganese-binding protein                           |                         |    |    |   |   |   |   |
|         |                        |                      |          |          | 13     | 35  | 16.6561    | 42.7817  |                                                                 |                         |    |    |   |   |   |   |
| FN1814  | -1.431                 | 8.650                | 2.654e-3 | 8.491e-3 | 18     | 29  | 18.0000    | 32.8239  | AAL93913.1  Hypothetical protein                                |                         |    |    |   |   |   |   |
|         |                        |                      |          |          | 5      | 27  | 6.4062     | 33.0031  |                                                                 |                         |    |    |   |   |   |   |
| FN1816  | -0.306                 | 5.795                | 3.338e-2 | 1.631e-1 | 7      | 6   | 7.0000     | 6.7912   | AAL93915.1  unknown                                             |                         |    |    |   |   |   |   |
|         |                        |                      |          |          | 5      | 8   | 6.4062     | 9.7787   |                                                                 |                         |    |    |   |   |   |   |
| FN1817  | 0.425                  | 6.174                |          |          | 12     |     | 12.0000    |          | AAL93916.1  Hemolysin                                           |                         |    |    |   |   |   |   |
|         |                        |                      |          |          | 6      | 6   | 7.6874     | 7.3340   |                                                                 |                         |    |    |   |   |   |   |
| FN1819  |                        |                      |          |          |        | 8   |            | 9.0549   | AAL93918.1  Export ABC transporter                              |                         |    |    |   |   |   |   |
|         |                        |                      |          |          |        | 12  |            | 14.6680  |                                                                 |                         |    |    |   |   |   |   |
| FN1820  |                        |                      |          |          |        | 8   |            | 9.0549   | AAL93919.1  Export ABC transporter                              |                         |    |    |   |   |   |   |
|         |                        |                      |          |          |        | 6   |            | 7.3340   |                                                                 |                         |    |    |   |   |   |   |
| FN1822  |                        |                      |          |          |        | 16  |            | 18.1097  | AAL93921.1  Flavodoxin                                          |                         |    |    |   |   |   |   |
|         |                        |                      |          |          |        | 10  |            | 12.2234  |                                                                 |                         |    |    |   |   |   |   |
| FN1825  |                        |                      |          |          | 10     |     | 10.0000    |          | AAL93924.1  Hypothetical protein                                |                         |    |    |   |   |   |   |
|         |                        |                      |          |          | 7      |     | 8.9687     |          |                                                                 |                         |    |    |   |   |   |   |
| FN1826  | -0.410                 | 11.630               | 5.195e-3 | 1.912e-2 | 49     | 52  | 49.0000    | 58.8567  | AAL93925.1  Protease                                            |                         |    |    |   |   |   |   |
|         |                        |                      |          |          | 38     | 58  | 48.6871    | 70.8955  |                                                                 |                         |    |    |   |   |   |   |
| FN1827  | -0.895                 | 10.851               | 6.268e-3 | 2.389e-2 | 31     | 42  | 31.0000    | 47.5381  | AAL93926.1  Replicative DNA helicase                            |                         |    |    |   |   |   |   |
|         |                        |                      |          |          | 25     | 57  | 32.0310    | 69.6731  |                                                                 |                         |    |    |   |   |   |   |
| FN1828  | -1.285                 | 11.923               | 1.042e-4 | 1.164e-4 | 35     | 79  | 35.0000    | 89.4169  | AAL93927.1  LSU ribosomal protein L9P                           |                         |    |    |   |   |   |   |
|         |                        |                      |          |          | 35     | 86  | 44.8434    | 105.1209 |                                                                 |                         |    |    |   |   |   |   |

Show detected proteins only  
 Show all proteins  
 Filter by category:

Proteins found: 1297

Enter (or paste) list of ORFs

Find ORFs

Test Cutoff

q-Value

p-Value

.005

| Signif | Direction | Applies To   |
|--------|-----------|--------------|
| yes    | +         | ratios, bars |
| no     | n/a       | bars         |
| yes    | -         | ratios, bars |
| yes    | +         | p-, q-Values |
| yes    | -         | p-, q-Values |

Dot Plots

Fn Summary Table FnPg vs Fn FnSg vs Fn FnPgSg vs Fn FnPgSg vs FnPg FnSg vs FnPg FnPgSg vs FnSg Fn Coverage

| Protein | FnPgSg vs Fn           |                      |          |          | Raw    |     | Normalized |          | Description                                                 | Log <sub>2</sub> Ratios |    |    |   |   |   |   |
|---------|------------------------|----------------------|----------|----------|--------|-----|------------|----------|-------------------------------------------------------------|-------------------------|----|----|---|---|---|---|
|         | Log <sub>2</sub> Ratio | Log <sub>2</sub> Sum | q-Value  | p-Value  | FnPgSg | Fn  | FnPgSg     | Fn       |                                                             | -6                      | -4 | -2 | 0 | 2 | 4 | 6 |
| FN1830  | -0.965                 | 8.788                | 1.069e-4 | 1.205e-4 | 16     | 26  | 16.0000    | 29.4283  | AAL93929.1  DNA polymerase III subunits gamma and tau       |                         |    |    |   |   |   |   |
|         |                        |                      |          |          | 11     | 24  | 14.0936    | 29.3361  |                                                             |                         |    |    |   |   |   |   |
| FN1831  | -0.796                 | 11.183               | 3.185e-3 | 1.06e-2  | 45     | 55  | 45.0000    | 62.2522  | AAL93930.1  Nitrogen assimilation regulatory protein        |                         |    |    |   |   |   |   |
|         |                        |                      |          |          | 22     | 53  | 28.1873    | 64.7838  |                                                             |                         |    |    |   |   |   |   |
| FN1832  |                        |                      |          |          | 4      |     | 4.0000     |          | AAL93931.1  TonB protein                                    |                         |    |    |   |   |   |   |
|         |                        |                      |          |          |        |     |            |          |                                                             |                         |    |    |   |   |   |   |
| FN1833  |                        |                      |          |          | 24     |     | 24.0000    |          | AAL93932.1  Biopolymer transport exbD protein               |                         |    |    |   |   |   |   |
|         |                        |                      |          |          | 15     |     | 19.2186    |          |                                                             |                         |    |    |   |   |   |   |
| FN1834  | -0.833                 | 10.984               | 2.285e-4 | 3.536e-4 | 29     | 50  | 29.0000    | 56.5929  | AAL93933.1  Biopolymer transport exbB protein               |                         |    |    |   |   |   |   |
|         |                        |                      |          |          | 30     | 52  | 38.4372    | 63.5614  |                                                             |                         |    |    |   |   |   |   |
| FN1836  | -0.525                 | 13.016               | 6.48e-5  | 5.838e-5 | 80     | 100 | 80.0000    | 113.1859 | AAL93935.1  Tetratricopeptide repeat family protein         |                         |    |    |   |   |   |   |
|         |                        |                      |          |          | 56     | 86  | 71.7494    | 105.1209 |                                                             |                         |    |    |   |   |   |   |
| FN1838  |                        |                      |          |          | 11     |     | 11.0000    |          | AAL93937.1  Glycerol uptake facilitator protein             |                         |    |    |   |   |   |   |
|         |                        |                      |          |          |        |     |            |          |                                                             |                         |    |    |   |   |   |   |
| FN1839  | 1.061                  | 15.629               | 1.862e-3 | 5.55e-3  | 284    | 135 | 284.0000   | 152.8010 | AAL93938.1  Glycerol kinase                                 |                         |    |    |   |   |   |   |
|         |                        |                      |          |          | 286    | 130 | 366.4345   | 158.9036 |                                                             |                         |    |    |   |   |   |   |
| FN1840  | 1.679                  | 11.320               | 5.464e-7 | 5.367e-8 | 90     | 24  | 90.0000    | 27.1646  | AAL93939.1  Dihydroxyacetone kinase                         |                         |    |    |   |   |   |   |
|         |                        |                      |          |          | 71     | 24  | 90.9680    | 29.3361  |                                                             |                         |    |    |   |   |   |   |
| FN1841  | -0.747                 | 8.326                | 2.398e-2 | 1.108e-1 | 11     | 14  | 11.0000    | 15.8460  | AAL93940.1  Dihydroxyacetone kinase                         |                         |    |    |   |   |   |   |
|         |                        |                      |          |          | 13     | 25  | 16.6561    | 30.5584  |                                                             |                         |    |    |   |   |   |   |
| FN1842  | 0.943                  | 10.274               | 6.731e-4 | 1.459e-3 | 54     | 20  | 54.0000    | 22.6372  | AAL93941.1  Dihydroxyacetone kinase phosphotransfer protein |                         |    |    |   |   |   |   |
|         |                        |                      |          |          | 34     | 23  | 43.5621    | 28.1137  |                                                             |                         |    |    |   |   |   |   |
| FN1844  |                        |                      |          |          |        |     |            |          | AAL93943.1  Ketoacyl reductase hetN                         |                         |    |    |   |   |   |   |
|         |                        |                      |          |          |        |     |            |          |                                                             |                         |    |    |   |   |   |   |
| FN1847  |                        |                      |          |          |        |     |            |          | AAL93946.1  DTDP-4-dehydrorhamnose 3,5-epimerase            |                         |    |    |   |   |   |   |
|         |                        |                      |          |          |        |     |            |          |                                                             |                         |    |    |   |   |   |   |
| FN1848  |                        |                      |          |          | 4      |     | 5.1250     |          | AAL93947.1  Metal dependent hydrolase                       |                         |    |    |   |   |   |   |
|         |                        |                      |          |          |        |     |            |          |                                                             |                         |    |    |   |   |   |   |
| FN1849  | -2.749                 | 6.749                |          |          | 4      | 27  | 4.0000     | 30.5602  | AAL93948.1  Coenzyme F390 synthetase                        |                         |    |    |   |   |   |   |
|         |                        |                      |          |          |        | 19  |            | 23.2244  |                                                             |                         |    |    |   |   |   |   |
| FN1850  |                        |                      |          |          |        | 5   |            | 5.6593   | AAL93949.1  3-oxoacyl-[acyl-carrier-protein] synthase III   |                         |    |    |   |   |   |   |
|         |                        |                      |          |          |        | 7   |            | 8.5563   |                                                             |                         |    |    |   |   |   |   |

Show detected proteins only  
 Show all proteins  
 Filter by category:

Proteins found: 1297

Enter (or paste) list of ORFs

Find ORFs

Test Cutoff

q-Value

p-Value

.005

| Signif | Direction | Applies To   |
|--------|-----------|--------------|
| yes    | +         | ratios, bars |
| no     | n/a       | bars         |
| yes    | -         | ratios, bars |
| yes    | +         | p-, q-Values |
| yes    | -         | p-, q-Values |

Dot Plots Dot Plots

Fn Summary Table FnPg vs Fn FnSg vs Fn FnPgSg vs Fn FnPgSg vs FnPg FnSg vs FnPg FnPgSg vs FnSg Fn Coverage

| Protein | FnPgSg vs Fn           |                      |          |          | Raw    |      | Normalized |           | Description                                                                | Log <sub>2</sub> Ratios |    |    |   |   |   |   |
|---------|------------------------|----------------------|----------|----------|--------|------|------------|-----------|----------------------------------------------------------------------------|-------------------------|----|----|---|---|---|---|
|         | Log <sub>2</sub> Ratio | Log <sub>2</sub> Sum | q-Value  | p-Value  | FnPgSg | Fn   | FnPgSg     | Fn        |                                                                            | -6                      | -4 | -2 | 0 | 2 | 4 | 6 |
| FN1851  | -0.557                 | 11.361               | 7.598e-5 | 7.293e-5 | 41     | 57   | 41.0000    | 64.5160   | AAL93950.1  Ribonuclease PH                                                |                         |    |    |   |   |   |   |
|         |                        |                      |          |          | 34     | 49   | 43.5621    | 59.8944   |                                                                            |                         |    |    |   |   |   |   |
| FN1852  | 0.067                  | 10.712               | 6.879e-2 | 3.689e-1 | 39     | 34   | 39.0000    | 38.4832   | AAL93951.1  unknown                                                        |                         |    |    |   |   |   |   |
|         |                        |                      |          |          | 35     | 34   | 44.8434    | 41.5594   |                                                                            |                         |    |    |   |   |   |   |
| FN1853  | -1.173                 | 6.196                | 1.402e-3 | 3.832e-3 | 5      | 13   | 5.0000     | 14.7142   | AAL93952.1  Methylaspartate mutase                                         |                         |    |    |   |   |   |   |
|         |                        |                      |          |          | 5      | 9    | 6.4062     | 11.0010   |                                                                            |                         |    |    |   |   |   |   |
| FN1854  | -0.915                 | 10.472               | 6.436e-7 | 6.825e-8 | 28     | 45   | 28.0000    | 50.9337   | AAL93953.1  Methylaspartate mutase                                         |                         |    |    |   |   |   |   |
|         |                        |                      |          |          | 21     | 43   | 26.9060    | 52.5604   |                                                                            |                         |    |    |   |   |   |   |
| FN1856  | -0.236                 | 23.088               | 9.181e-3 | 3.733e-2 | 2988   | 2855 | 2988.0000  | 3231.4573 | AAL93955.1  Butyrate-acetoacetate CoA-transferase subunit B                |                         |    |    |   |   |   |   |
|         |                        |                      |          |          | 1963   | 2657 | 2515.0730  | 3247.7454 |                                                                            |                         |    |    |   |   |   |   |
| FN1857  | 0.190                  | 18.976               | 2.879e-2 | 1.369e-1 | 687    | 633  | 687.0000   | 716.4667  | AAL93956.1  Acetoacetate: butyrate/acetate coenzyme A transferase          |                         |    |    |   |   |   |   |
|         |                        |                      |          |          | 661    | 514  | 846.8993   | 628.2805  |                                                                            |                         |    |    |   |   |   |   |
| FN1858  | 0.610                  | 12.869               | 5.854e-3 | 2.203e-2 | 92     | 60   | 92.0000    | 67.9115   | AAL93957.1  Short-chain fatty acids transporter                            |                         |    |    |   |   |   |   |
|         |                        |                      |          |          | 95     | 59   | 121.7177   | 72.1178   |                                                                            |                         |    |    |   |   |   |   |
| FN1859  | -1.875                 | 22.425               | 5.322e-4 | 1.08e-3  | 1120   | 4473 | 1120.0000  | 5062.8051 | AAL93958.1  Major outer membrane protein                                   |                         |    |    |   |   |   |   |
|         |                        |                      |          |          | 1060   | 3294 | 1358.1138  | 4026.3732 |                                                                            |                         |    |    |   |   |   |   |
| FN1860  | 0.578                  | 9.807                | 2.499e-2 | 1.162e-1 | 27     | 26   | 27.0000    | 29.4283   | AAL93959.1  NA+/H+ antiporter NHAC                                         |                         |    |    |   |   |   |   |
|         |                        |                      |          |          | 36     | 16   | 46.1246    | 19.5574   |                                                                            |                         |    |    |   |   |   |   |
| FN1862  | 0.075                  | 15.728               | 4.34e-2  | 2.207e-1 | 249    | 211  | 249.0000   | 238.8222  | AAL93961.1  L-beta-lysine 5,6-aminomutase beta subunit                     |                         |    |    |   |   |   |   |
|         |                        |                      |          |          | 179    | 176  | 229.3419   | 215.1310  |                                                                            |                         |    |    |   |   |   |   |
| FN1863  | 0.824                  | 17.264               | 5.428e-4 | 1.107e-3 | 483    | 246  | 483.0000   | 278.4373  | AAL93962.1  L-beta-lysine 5,6-aminomutase alpha subunit                    |                         |    |    |   |   |   |   |
|         |                        |                      |          |          | 447    | 260  | 572.7140   | 317.8072  |                                                                            |                         |    |    |   |   |   |   |
| FN1864  | -0.129                 | 8.808                | 9.99e-2  | 5.618e-1 | 20     | 24   | 20.0000    | 27.1646   | AAL93963.1  DNA mismatch repair protein mutS                               |                         |    |    |   |   |   |   |
|         |                        |                      |          |          | 16     | 14   | 20.4998    | 17.1127   |                                                                            |                         |    |    |   |   |   |   |
| FN1865  | -0.594                 | 3.764                |          |          | 3      | 4    | 3.0000     | 4.5274    | AAL93964.1  Hypothetical protein                                           |                         |    |    |   |   |   |   |
|         |                        |                      |          |          |        |      |            |           |                                                                            |                         |    |    |   |   |   |   |
| FN1866  | -0.041                 | 21.135               | 7.773e-2 | 4.231e-1 | 1420   | 1326 | 1420.0000  | 1500.8450 | AAL93965.1  Lysine 2,3-aminomutase                                         |                         |    |    |   |   |   |   |
|         |                        |                      |          |          | 1227   | 1291 | 1572.0808  | 1578.0351 |                                                                            |                         |    |    |   |   |   |   |
| FN1867  | 0.438                  | 19.764               | 1.161e-3 | 2.926e-3 | 1165   | 736  | 1165.0000  | 833.0482  | AAL93966.1  Zn-dependent alcohol dehydrogenases and related dehydrogenases |                         |    |    |   |   |   |   |
|         |                        |                      |          |          | 805    | 645  | 1031.3978  | 788.4064  |                                                                            |                         |    |    |   |   |   |   |
| FN1868  | -0.191                 | 14.985               | 7.034e-3 | 2.731e-2 | 168    | 179  | 168.0000   | 202.6028  | AAL93967.1  Hypothetical cytosolic protein                                 |                         |    |    |   |   |   |   |
|         |                        |                      |          |          | 132    | 149  | 169.1236   | 182.1280  |                                                                            |                         |    |    |   |   |   |   |

Show detected proteins only  
 Show all proteins  
 Filter by category:

Proteins found: 1297

Enter (or paste) list of ORFs

Find ORFs

Test Cutoff

q-Value

p-Value

.005

| Signif | Direction | Applies To   |
|--------|-----------|--------------|
| yes    | +         | ratios, bars |
| no     | n/a       | bars         |
| yes    | -         | ratios, bars |
| yes    | +         | p-, q-Values |
| yes    | -         | p-, q-Values |

Dot Plots Dot Plots



Fn Summary Table FnPg vs Fn FnSg vs Fn FnPgSg vs Fn FnPgSg vs FnPg FnSg vs FnPg FnPgSg vs FnSg Fn Coverage

| Protein | FnPgSg vs Fn           |                      |          |          | Raw    |     | Normalized |          | Description                                             | Log <sub>2</sub> Ratios |    |    |   |   |   |   |
|---------|------------------------|----------------------|----------|----------|--------|-----|------------|----------|---------------------------------------------------------|-------------------------|----|----|---|---|---|---|
|         | Log <sub>2</sub> Ratio | Log <sub>2</sub> Sum | q-Value  | p-Value  | FnPgSg | Fn  | FnPgSg     | Fn       |                                                         | -6                      | -4 | -2 | 0 | 2 | 4 | 6 |
| FN1869  | -0.375                 | 15.226               | 4.489e-3 | 1.604e-2 | 167    | 180 | 167.0000   | 203.7346 | AAL93968.1  Hypothetical protein                        |                         |    |    |   |   |   |   |
|         |                        |                      |          |          | 138    | 198 | 176.8110   | 242.0224 |                                                         |                         |    |    |   |   |   |   |
| FN1870  | -0.932                 | 4.817                |          |          |        |     |            |          | AAL93969.1  unknown                                     |                         |    |    |   |   |   |   |
|         |                        |                      |          |          | 3      | 6   | 3.8437     | 7.3340   |                                                         |                         |    |    |   |   |   |   |
| FN1871  |                        |                      |          |          |        | 9   |            | 10.1867  | AAL93970.1  unknown                                     |                         |    |    |   |   |   |   |
|         |                        |                      |          |          |        | 9   |            | 11.0010  |                                                         |                         |    |    |   |   |   |   |
| FN1872  |                        |                      |          |          |        | 17  |            | 19.2416  | AAL93971.1  unknown                                     |                         |    |    |   |   |   |   |
|         |                        |                      |          |          |        | 19  |            | 23.2244  |                                                         |                         |    |    |   |   |   |   |
| FN1873  | -0.124                 | 11.905               | 5.623e-2 | 2.954e-1 | 52     | 57  | 52.0000    | 64.5160  | AAL93972.1  Bis(5'-nucleosyl)-tetraphosphatase          |                         |    |    |   |   |   |   |
|         |                        |                      |          |          | 52     | 53  | 66.6245    | 64.7838  |                                                         |                         |    |    |   |   |   |   |
| FN1874  | -1.083                 | 10.169               | 9.898e-5 | 1.073e-4 | 21     | 43  | 21.0000    | 48.6699  | AAL93973.1  Ribose 5-phosphate isomerase                |                         |    |    |   |   |   |   |
|         |                        |                      |          |          | 20     | 41  | 25.6248    | 50.1158  |                                                         |                         |    |    |   |   |   |   |
| FN1875  | -0.055                 | 13.845               | 1.35e-1  | 7.898e-1 | 133    | 131 | 133.0000   | 148.2735 | AAL93974.1  Peptidyl-prolyl cis-trans isomerase         |                         |    |    |   |   |   |   |
|         |                        |                      |          |          | 82     | 81  | 105.0616   | 99.0092  |                                                         |                         |    |    |   |   |   |   |
| FN1877  |                        |                      |          |          | 7      |     | 7.0000     |          | AAL93976.1  Guanine-hypoxanthine permease               |                         |    |    |   |   |   |   |
|         |                        |                      |          |          |        |     |            |          |                                                         |                         |    |    |   |   |   |   |
| FN1878  | -1.230                 | 5.874                |          |          | 5      | 11  | 5.0000     | 12.4504  | AAL93977.1  unknown                                     |                         |    |    |   |   |   |   |
|         |                        |                      |          |          |        | 9   |            | 11.0010  |                                                         |                         |    |    |   |   |   |   |
| FN1879  | -0.567                 | 10.101               |          |          | 25     |     | 25.0000    |          | AAL93978.1  SSU ribosomal protein S20P                  |                         |    |    |   |   |   |   |
|         |                        |                      |          |          | 23     | 33  | 29.4685    | 40.3371  |                                                         |                         |    |    |   |   |   |   |
| FN1880  | 0.261                  | 11.039               | 6.04e-2  | 3.195e-1 | 62     | 33  | 62.0000    | 37.3513  | AAL93979.1  Oxygen-insensitive NAD(P)H nitroreductase   |                         |    |    |   |   |   |   |
|         |                        |                      |          |          | 30     | 38  | 38.4372    | 46.4487  |                                                         |                         |    |    |   |   |   |   |
| FN1881  |                        |                      |          |          | 6      |     | 6.0000     |          | AAL93980.1  Esterase                                    |                         |    |    |   |   |   |   |
|         |                        |                      |          |          |        |     |            |          |                                                         |                         |    |    |   |   |   |   |
| FN1884  | 0.857                  | 12.449               | 9.932e-3 | 4.091e-2 | 77     | 55  | 77.0000    | 62.2522  | AAL93983.1  unknown                                     |                         |    |    |   |   |   |   |
|         |                        |                      |          |          | 97     | 40  | 124.2802   | 48.8934  |                                                         |                         |    |    |   |   |   |   |
| FN1890  | 1.438                  | 7.041                | 7.304e-4 | 1.61e-3  | 16     | 8   | 16.0000    | 9.0549   | AAL93989.1  Hypothetical protein                        |                         |    |    |   |   |   |   |
|         |                        |                      |          |          | 17     | 4   | 21.7811    | 4.8893   |                                                         |                         |    |    |   |   |   |   |
| FN1891  | 0.151                  | 7.369                | 1.013e-1 | 5.703e-1 | 13     | 14  | 13.0000    | 15.8460  | AAL93990.1  Glycerophosphoryl diester phosphodiesterase |                         |    |    |   |   |   |   |
|         |                        |                      |          |          | 11     | 7   | 14.0936    | 8.5563   |                                                         |                         |    |    |   |   |   |   |
| FN1893  | -1.052                 | 18.021               | 3.598e-4 | 6.499e-4 | 309    | 648 | 309.0000   | 733.4446 | AAL93991.1  Fusobacterium outer membrane protein family |                         |    |    |   |   |   |   |
|         |                        |                      |          |          | 318    | 615 | 407.4341   | 751.7363 |                                                         |                         |    |    |   |   |   |   |

Show detected proteins only  
 Show all proteins  
 Filter by category:

Proteins found: 1297

Enter (or paste) list of ORFs

Find ORFs

Test Cutoff

q-Value p-Value

.005

| Signif | Direction | Applies To   |
|--------|-----------|--------------|
| yes    | +         | ratios, bars |
| no     | n/a       | bars         |
| yes    | -         | ratios, bars |
| yes    | +         | p-, q-Values |
| yes    | -         | p-, q-Values |

Dot Plots Dot Plots

Fn Summary Table FnPg vs Fn FnSg vs Fn FnPgSg vs Fn FnPgSg vs FnPg FnSg vs FnPg FnPgSg vs FnSg Fn Coverage

| Protein       | FnPgSg vs Fn           |                      |          |          | Raw    |      | Normalized |           | Description                                                                 | Log <sub>2</sub> Ratios |    |    |   |   |   |   |
|---------------|------------------------|----------------------|----------|----------|--------|------|------------|-----------|-----------------------------------------------------------------------------|-------------------------|----|----|---|---|---|---|
|               | Log <sub>2</sub> Ratio | Log <sub>2</sub> Sum | q-Value  | p-Value  | FnPgSg | Fn   | FnPgSg     | Fn        |                                                                             | -6                      | -4 | -2 | 0 | 2 | 4 | 6 |
| <b>FN1895</b> |                        |                      |          |          | 5      |      | 5.0000     |           | AAL93994.1  Hypothetical protein                                            |                         |    |    |   |   |   |   |
| <b>FN1898</b> | -0.600                 | 10.928               | 5.152e-3 | 1.893e-2 | 32     | 55   | 32.0000    | 62.2522   | AAL93997.1  Sugar transport ATP-binding protein                             |                         |    |    |   |   |   |   |
| <b>FN1899</b> | -0.635                 | 14.521               | 4.938e-4 | 9.835e-4 | 109    | 181  | 109.0000   | 204.8665  | AAL93998.1  Hypothetical lipoprotein                                        |                         |    |    |   |   |   |   |
| <b>FN1902</b> | -0.214                 | 9.710                | 3.108e-2 | 1.498e-1 | 23     | 27   | 23.0000    | 30.5602   | AAL94001.1  Deoxycytidylate deaminase                                       |                         |    |    |   |   |   |   |
| <b>FN1903</b> | 1.093                  | 12.958               | 4.744e-5 | 3.787e-5 | 126    | 55   | 126.0000   | 62.2522   | AAL94002.1  Coenzyme A disulfide reductase/ disulfide bond regulator domain |                         |    |    |   |   |   |   |
| <b>FN1905</b> | -0.290                 | 3.460                |          |          | 3      |      | 3.0000     |           | AAL94004.1  outer membrane protein                                          |                         |    |    |   |   |   |   |
| <b>FN1906</b> | -0.001                 | 16.361               | 1.635e-1 | 9.896e-1 | 320    | 257  | 320.0000   | 290.8878  | AAL94005.1  Cytosol aminopeptidase                                          |                         |    |    |   |   |   |   |
| <b>FN1908</b> | -0.372                 | 15.435               | 6.722e-3 | 2.592e-2 | 192    | 233  | 192.0000   | 263.7231  | AAL94007.1  Glycerophosphoryl diester phosphodiesterase                     |                         |    |    |   |   |   |   |
| <b>FN1909</b> | -0.228                 | 14.218               | 5.994e-4 | 1.256e-3 | 127    | 129  | 127.0000   | 146.0098  | AAL94008.1  UDP-3-O-[3-hydroxymyristoyl] glucosamine N-acyltransferase      |                         |    |    |   |   |   |   |
| <b>FN1910</b> | 0.532                  | 17.313               | 1.498e-3 | 4.204e-3 | 454    | 257  | 454.0000   | 290.8878  | AAL94009.1  periplasmic protein                                             |                         |    |    |   |   |   |   |
| <b>FN1911</b> | 0.105                  | 21.007               | 3.143e-2 | 1.518e-1 | 1561   | 1318 | 1561.0000  | 1491.7901 | AAL94010.1  Outer membrane protein                                          |                         |    |    |   |   |   |   |
| <b>FN1912</b> | -2.460                 | 7.175                |          |          |        | 25   |            | 28.2965   | AAL94011.1  Hypothetical protein                                            |                         |    |    |   |   |   |   |
| <b>FN1913</b> | -0.991                 | 12.146               | 2.015e-4 | 2.936e-4 | 43     | 77   | 43.0000    | 87.1531   | AAL94012.1  hydrolase (HD superfamily)                                      |                         |    |    |   |   |   |   |
| <b>FN1914</b> | -0.623                 | 12.497               | 1.233e-3 | 3.184e-3 | 70     | 76   | 70.0000    | 86.0213   | AAL94013.1  Anti-sigma F factor antagonist                                  |                         |    |    |   |   |   |   |
| <b>FN1917</b> |                        |                      |          |          |        | 3    |            | 3.6670    | AAL94016.1  tRNA delta(2)-isopentenylpyrophosphate transferase              |                         |    |    |   |   |   |   |
| <b>FN1918</b> | 0.288                  | 12.341               | 2.08e-2  | 9.434e-2 | 90     | 59   | 90.0000    | 66.7797   | AAL94017.1  SPO0B-associated GTP-binding protein                            |                         |    |    |   |   |   |   |

Show detected proteins only  
 Show all proteins  
 Filter by category:

Proteins found: 1297

Enter (or paste) list of ORFs

Find ORFs

Test Cutoff

q-Value p-Value

.005

| Signif | Direction | Applies To   |
|--------|-----------|--------------|
| yes    | +         | ratios, bars |
| no     | n/a       | bars         |
| yes    | -         | ratios, bars |
| yes    | +         | p-, q-Values |
| yes    | -         | p-, q-Values |

Dot Plots Dot Plots

Fn Summary Table FnPg vs Fn FnSg vs Fn FnPgSg vs Fn FnPgSg vs FnPg FnSg vs FnPg FnPgSg vs FnSg Fn Coverage

| Protein | FnPgSg vs Fn           |                      |          |          | Raw    |     | Normalized |           | Description                                        | Log <sub>2</sub> Ratios |    |    |   |   |   |   |
|---------|------------------------|----------------------|----------|----------|--------|-----|------------|-----------|----------------------------------------------------|-------------------------|----|----|---|---|---|---|
|         | Log <sub>2</sub> Ratio | Log <sub>2</sub> Sum | q-Value  | p-Value  | FnPgSg | Fn  | FnPgSg     | Fn        |                                                    | -6                      | -4 | -2 | 0 | 2 | 4 | 6 |
| FN1919  | -2.787                 | 8.571                | 1.538e-5 | 5.96e-6  | 11     | 43  | 11.0000    | 48.6699   | AAL94018.1  Methyltransferase                      |                         |    |    |   |   |   |   |
|         |                        |                      |          |          | 3      | 44  | 3.8437     | 53.7828   |                                                    | ■                       |    |    |   |   |   |   |
| FN1922  | -0.377                 | 6.262                |          |          |        | 9   |            | 10.1867   | AAL94021.1  Hypothetical protein                   |                         |    |    |   |   |   |   |
|         |                        |                      |          |          | 6      | 8   | 7.6874     | 9.7787    |                                                    | ■                       |    |    |   |   |   |   |
| FN1923  |                        |                      |          |          |        | 4   |            | 4.5274    | AAL94022.1  Adenine-specific methyltransferase     |                         |    |    |   |   |   |   |
|         |                        |                      |          |          |        |     |            |           |                                                    |                         |    |    |   |   |   |   |
| FN1926  | 0.306                  | 11.621               | 2.064e-2 | 9.352e-2 | 71     | 46  | 71.0000    | 52.0655   | AAL94025.1  Nitrogen regulatory IIA protein        |                         |    |    |   |   |   |   |
|         |                        |                      |          |          | 42     | 40  | 53.8121    | 48.8934   |                                                    | ■                       |    |    |   |   |   |   |
| FN1927  | -0.585                 | 12.934               | 1.919e-3 | 5.766e-3 | 74     | 104 | 74.0000    | 117.7133  | AAL94026.1  DEGV protein                           |                         |    |    |   |   |   |   |
|         |                        |                      |          |          | 55     | 81  | 70.4682    | 99.0092   |                                                    | ■                       |    |    |   |   |   |   |
| FN1928  | 0.186                  | 7.409                |          |          | 15     |     | 15.0000    |           | AAL94027.1  Transcriptional regulator, MerR family |                         |    |    |   |   |   |   |
|         |                        |                      |          |          | 10     | 10  | 12.8124    | 12.2234   |                                                    | ■                       |    |    |   |   |   |   |
| FN1929  | -1.330                 | 10.628               | 1.076e-2 | 4.475e-2 | 22     | 38  | 22.0000    | 43.0106   | AAL94028.1  Competence-damage protein cinA         |                         |    |    |   |   |   |   |
|         |                        |                      |          |          | 22     | 68  | 28.1873    | 83.1188   |                                                    | ■                       |    |    |   |   |   |   |
| FN1931  |                        |                      |          |          |        | 4   |            | 4.5274    | AAL94030.1  Protease                               |                         |    |    |   |   |   |   |
|         |                        |                      |          |          |        | 5   |            | 6.1117    |                                                    |                         |    |    |   |   |   |   |
| FN1933  | -0.152                 | 7.611                | 5.258e-2 | 2.737e-1 | 15     | 12  | 15.0000    | 13.5823   | AAL94032.1  Hypothetical protein                   |                         |    |    |   |   |   |   |
|         |                        |                      |          |          | 9      | 13  | 11.5312    | 15.8904   |                                                    | ■                       |    |    |   |   |   |   |
| FN1935  | -1.754                 | 4.924                |          |          | 3      | 6   | 3.0000     | 6.7912    | AAL94034.1  Adenine-specific methyltransferase     |                         |    |    |   |   |   |   |
|         |                        |                      |          |          |        | 11  |            | 13.4457   |                                                    | ■                       |    |    |   |   |   |   |
| FN1939  | -0.314                 | 7.208                | 2.067e-2 | 9.369e-2 | 9      | 11  | 9.0000     | 12.4504   | AAL94038.1  Hypothetical protein                   |                         |    |    |   |   |   |   |
|         |                        |                      |          |          | 10     | 12  | 12.8124    | 14.6680   |                                                    | ■                       |    |    |   |   |   |   |
| FN1941  | -0.193                 | 13.273               | 7.688e-3 | 3.029e-2 | 99     | 94  | 99.0000    | 106.3947  | AAL94040.1  ClpB protein                           |                         |    |    |   |   |   |   |
|         |                        |                      |          |          | 68     | 87  | 87.1243    | 106.3432  |                                                    | ■                       |    |    |   |   |   |   |
| FN1942  |                        |                      |          |          |        | 4   |            | 4.5274    | AAL94041.1  putative DNA-binding protein           |                         |    |    |   |   |   |   |
|         |                        |                      |          |          |        |     |            |           |                                                    |                         |    |    |   |   |   |   |
| FN1943  | -0.290                 | 19.679               | 1.37e-3  | 3.709e-3 | 828    | 929 | 828.0000   | 1051.4970 | AAL94042.1  Tryptophanase                          |                         |    |    |   |   |   |   |
|         |                        |                      |          |          | 647    | 797 | 828.9619   | 974.2014  |                                                    | ■                       |    |    |   |   |   |   |
| FN1949  | -1.370                 | 5.255                |          |          |        | 10  |            | 11.3186   | AAL94045.1  Xaa-Pro dipeptidase                    |                         |    |    |   |   |   |   |
|         |                        |                      |          |          | 3      | 7   | 3.8437     | 8.5563    |                                                    | ■                       |    |    |   |   |   |   |
| FN1950  | -3.486                 | 8.201                |          |          |        | 55  |            | 62.2522   | AAL94046.1  Serine protease                        |                         |    |    |   |   |   |   |
|         |                        |                      |          |          | 4      | 43  | 5.1250     | 52.5604   |                                                    | ■                       |    |    |   |   |   |   |

Show detected proteins only  
 Show all proteins  
 Filter by category:

Proteins found: 1297

Enter (or paste) list of ORFs

Find ORFs

Test Cutoff

q-Value p-Value

.005

| Signif      | Direction | Applies To |
|-------------|-----------|------------|
| red         | yes       | +          |
| yellow      | no        | n/a        |
| green       | yes       | -          |
| pink        | yes       | +          |
| light green | yes       | -          |

ratios, bars  
bars  
ratios, bars  
p-, q-Values

Dot Plots Dot Plots

Fn Summary Table FnPg vs Fn FnSg vs Fn FnPgSg vs Fn FnPgSg vs FnPg FnSg vs FnPg FnPgSg vs FnSg Fn Coverage

| Protein | FnPgSg vs Fn           |                      |          |          | Raw    |     | Normalized |          | Description                                                            | Log <sub>2</sub> Ratios |    |    |   |   |   |   |
|---------|------------------------|----------------------|----------|----------|--------|-----|------------|----------|------------------------------------------------------------------------|-------------------------|----|----|---|---|---|---|
|         | Log <sub>2</sub> Ratio | Log <sub>2</sub> Sum | q-Value  | p-Value  | FnPgSg | Fn  | FnPgSg     | Fn       |                                                                        | -6                      | -4 | -2 | 0 | 2 | 4 | 6 |
| FN1951  |                        |                      |          |          |        | 3   |            | 3.3956   | AAL94047.1  ATPase associated with chromosome architecture/replication |                         |    |    |   |   |   |   |
|         |                        |                      |          |          |        | 8   |            | 9.7787   |                                                                        |                         |    |    |   |   |   |   |
| FN1964  | -0.805                 | 8.642                | 6.811e-3 | 2.631e-2 | 20     | 24  | 20.0000    | 27.1646  | AAL94054.1  O-linked GLCNAC transferase                                |                         |    |    |   |   |   |   |
|         |                        |                      |          |          | 8      | 21  | 10.2499    | 25.6690  |                                                                        |                         |    |    |   |   |   |   |
| FN1965  | 0.256                  | 10.490               | 2.682e-2 | 1.26e-1  | 47     | 30  | 47.0000    | 33.9558  | AAL94055.1  Tetratricopeptide repeat family protein                    |                         |    |    |   |   |   |   |
|         |                        |                      |          |          | 28     | 29  | 35.8747    | 35.4477  |                                                                        |                         |    |    |   |   |   |   |
| FN1966  | -0.059                 | 11.533               | 1.202e-1 | 6.915e-1 | 49     | 42  | 49.0000    | 47.5381  | AAL94056.1  Hypothetical protein                                       |                         |    |    |   |   |   |   |
|         |                        |                      |          |          | 45     | 52  | 57.6558    | 63.5614  |                                                                        |                         |    |    |   |   |   |   |
| FN1970  | 1.396                  | 6.219                |          |          | 14     | 4   | 14.0000    | 4.5274   | AAL94060.1  Hemin-binding periplasmic protein hmuT precursor           |                         |    |    |   |   |   |   |
|         |                        |                      |          |          |        | 5   |            | 6.1117   |                                                                        |                         |    |    |   |   |   |   |
| FN1971  | 0.109                  | 8.767                | 9.539e-2 | 5.332e-1 | 19     | 15  | 19.0000    | 16.9779  | AAL94061.1  Hemin receptor                                             |                         |    |    |   |   |   |   |
|         |                        |                      |          |          | 19     | 19  | 24.3435    | 23.2244  |                                                                        |                         |    |    |   |   |   |   |
| FN1972  | 0.231                  | 7.335                | 4.225e-2 | 2.142e-1 | 16     | 11  | 16.0000    | 12.4504  | AAL94062.1  unknown                                                    |                         |    |    |   |   |   |   |
|         |                        |                      |          |          | 9      | 9   | 11.5312    | 11.0010  |                                                                        |                         |    |    |   |   |   |   |
| FN1973  | 2.612                  | 12.252               | 3.902e-5 | 2.856e-5 | 166    | 24  | 166.0000   | 27.1646  | AAL94063.1  Translation initiation inhibitor                           |                         |    |    |   |   |   |   |
|         |                        |                      |          |          | 140    | 24  | 179.3735   | 29.3361  |                                                                        |                         |    |    |   |   |   |   |
| FN1974  |                        |                      |          |          |        | 6   |            | 6.7912   | AAL94064.1  DNA/RNA helicase (DEAD/DEAH BOX family)                    |                         |    |    |   |   |   |   |
|         |                        |                      |          |          |        | 8   |            | 9.7787   |                                                                        |                         |    |    |   |   |   |   |
| FN1975  | -0.653                 | 14.244               | 1.97e-4  | 2.837e-4 | 103    | 164 | 103.0000   | 185.6249 | AAL94065.1  ATP-dependent RNA helicase                                 |                         |    |    |   |   |   |   |
|         |                        |                      |          |          | 93     | 134 | 119.1553   | 163.7930 |                                                                        |                         |    |    |   |   |   |   |
| FN1976  | -1.202                 | 9.819                | 9.477e-4 | 2.23e-3  | 14     | 46  | 14.0000    | 52.0655  | AAL94066.1  4-amino-4-deoxychorismate lyase                            |                         |    |    |   |   |   |   |
|         |                        |                      |          |          | 20     | 32  | 25.6248    | 39.1147  |                                                                        |                         |    |    |   |   |   |   |
| FN1977  | -0.923                 | 4.923                |          |          | 4      | 8   | 4.0000     | 9.0549   | AAL94067.1  Cell cycle protein MesJ                                    |                         |    |    |   |   |   |   |
|         |                        |                      |          |          |        | 5   |            | 6.1117   |                                                                        |                         |    |    |   |   |   |   |
| FN1978  | -0.599                 | 14.873               | 1.937e-4 | 2.766e-4 | 129    | 178 | 129.0000   | 201.4709 | AAL94068.1  Cell division proteinftsH                                  |                         |    |    |   |   |   |   |
|         |                        |                      |          |          | 119    | 184 | 152.4675   | 224.9097 |                                                                        |                         |    |    |   |   |   |   |
| FN1979  | 1.316                  | 14.456               | 1.183e-3 | 3.004e-3 | 204    | 75  | 204.0000   | 84.8894  | AAL94069.1  SSU ribosomal protein S15P                                 |                         |    |    |   |   |   |   |
|         |                        |                      |          |          | 210    | 86  | 269.0603   | 105.1209 |                                                                        |                         |    |    |   |   |   |   |
| FN1980  |                        |                      |          |          |        |     |            |          | AAL94070.1  Transporter                                                |                         |    |    |   |   |   |   |
|         |                        |                      |          |          | 3      |     | 3.8437     |          |                                                                        |                         |    |    |   |   |   |   |
| FN1983  | 0.554                  | 18.002               | 2.665e-3 | 8.536e-3 | 564    | 380 | 564.0000   | 430.1064 | AAL94073.1  Alkyl hydroperoxide reductase C22 protein                  |                         |    |    |   |   |   |   |
|         |                        |                      |          |          | 529    | 340 | 677.7757   | 415.5941 |                                                                        |                         |    |    |   |   |   |   |

Show detected proteins only  
 Show all proteins  
 Filter by category:

Proteins found: 1297

Test Cutoff

| Signif | Direction | Applies To   |
|--------|-----------|--------------|
| yes    | +         | ratios, bars |
| no     | n/a       | bars         |
| yes    | -         | ratios, bars |
| yes    | +         | p-, q-Values |
| yes    | -         | p-, q-Values |

Fn Summary Table FnPg vs Fn FnSg vs Fn FnPgSg vs Fn FnPgSg vs FnPg FnSg vs FnPg FnPgSg vs FnSg Fn Coverage

| Protein | FnPgSg vs Fn           |                      |          |          | Raw    |     | Normalized |          | Description                                               | Log <sub>2</sub> Ratios |    |    |   |   |   |   |
|---------|------------------------|----------------------|----------|----------|--------|-----|------------|----------|-----------------------------------------------------------|-------------------------|----|----|---|---|---|---|
|         | Log <sub>2</sub> Ratio | Log <sub>2</sub> Sum | q-Value  | p-Value  | FnPgSg | Fn  | FnPgSg     | Fn       |                                                           | -6                      | -4 | -2 | 0 | 2 | 4 | 6 |
| FN1984  | 0.514                  | 16.887               | 2.091e-3 | 6.385e-3 | 376    | 276 | 376.0000   | 312.3931 | AAL94074.1  Thioredoxin reductase                         |                         |    |    |   |   |   |   |
|         |                        |                      |          |          | 356    | 221 | 456.1212   | 270.1361 |                                                           |                         |    |    |   |   |   |   |
| FN1985  | -0.717                 | 12.352               | 1.767e-3 | 5.194e-3 | 50     | 72  | 50.0000    | 81.4938  | AAL94075.1  Inner membrane protein                        |                         |    |    |   |   |   |   |
|         |                        |                      |          |          | 49     | 85  | 62.7807    | 103.8985 |                                                           |                         |    |    |   |   |   |   |
| FN1986  | -0.356                 | 15.861               | 2.635e-3 | 8.419e-3 | 234    | 248 | 234.0000   | 280.7010 | AAL94076.1  Hypothetical protein                          |                         |    |    |   |   |   |   |
|         |                        |                      |          |          | 154    | 222 | 197.3109   | 271.3585 |                                                           |                         |    |    |   |   |   |   |
| FN1987  | -0.545                 | 4.834                | 1.357e-3 | 3.658e-3 | 5      | 6   | 5.0000     | 6.7912   | AAL94077.1  Transcriptional regulator, GntR family        |                         |    |    |   |   |   |   |
|         |                        |                      |          |          | 3      | 5   | 3.8437     | 6.1117   |                                                           |                         |    |    |   |   |   |   |
| FN1988  | 0.987                  | 12.239               | 3.608e-4 | 6.525e-4 | 92     | 43  | 92.0000    | 48.6699  | AAL94078.1  Tyrosine phenol-lyase                         |                         |    |    |   |   |   |   |
|         |                        |                      |          |          | 81     | 41  | 103.7804   | 50.1158  |                                                           |                         |    |    |   |   |   |   |
| FN1991  | -0.018                 | 16.999               | 9.589e-2 | 5.363e-1 | 349    | 326 | 349.0000   | 368.9860 | AAL94081.1  Glucosamine-1-phosphate acetyltransferase     |                         |    |    |   |   |   |   |
|         |                        |                      |          |          | 289    | 294 | 370.2782   | 359.3666 |                                                           |                         |    |    |   |   |   |   |
| FN1992  | -0.264                 | 15.227               | 2.353e-4 | 3.693e-4 | 173    | 187 | 173.0000   | 211.6576 | AAL94082.1  Ribose-phosphate pyrophosphokinase            |                         |    |    |   |   |   |   |
|         |                        |                      |          |          | 144    | 178 | 184.4985   | 217.5757 |                                                           |                         |    |    |   |   |   |   |
| FN1993  | 0.179                  | 5.180                |          |          |        | 5   |            | 5.6593   | AAL94083.1  SUA5 protein                                  |                         |    |    |   |   |   |   |
|         |                        |                      |          |          | 5      |     | 6.4062     |          |                                                           |                         |    |    |   |   |   |   |
| FN1994  | -0.324                 | 11.019               | 5.567e-3 | 2.076e-2 | 43     | 49  | 43.0000    | 55.4611  | AAL94084.1  Hypothetical protein                          |                         |    |    |   |   |   |   |
|         |                        |                      |          |          | 30     | 38  | 38.4372    | 46.4487  |                                                           |                         |    |    |   |   |   |   |
| FN1995  | 1.009                  | 7.110                | 3.173e-2 | 1.535e-1 | 9      | 6   | 9.0000     | 6.7912   | AAL94085.1  Hypothetical protein                          |                         |    |    |   |   |   |   |
|         |                        |                      |          |          | 19     | 8   | 24.3435    | 9.7787   |                                                           |                         |    |    |   |   |   |   |
| FN2001  |                        |                      |          |          |        | 9   |            | 10.1867  | AAL94091.1  Hypothetical protein                          |                         |    |    |   |   |   |   |
|         |                        |                      |          |          |        | 8   |            | 9.7787   |                                                           |                         |    |    |   |   |   |   |
| FN2007  | -1.867                 | 6.961                | 1.598e-3 | 4.581e-3 | 4      | 15  | 4.0000     | 16.9779  | AAL94097.1  Glutathione peroxidase                        |                         |    |    |   |   |   |   |
|         |                        |                      |          |          | 6      | 21  | 7.6874     | 25.6690  |                                                           |                         |    |    |   |   |   |   |
| FN2008  |                        |                      |          |          |        | 3   |            | 3.6670   | AAL94098.1  Glycine betaine transport ATP-binding protein |                         |    |    |   |   |   |   |
|         |                        |                      |          |          |        |     |            |          |                                                           |                         |    |    |   |   |   |   |
| FN2011  | -0.958                 | 14.186               | 2.145e-4 | 3.228e-4 | 87     | 171 | 87.0000    | 193.5479 | AAL94101.1  Valyl-tRNA synthetase                         |                         |    |    |   |   |   |   |
|         |                        |                      |          |          | 85     | 153 | 108.9054   | 187.0173 |                                                           |                         |    |    |   |   |   |   |
| FN2013  |                        |                      |          |          |        | 5   |            | 5.6593   | AAL94103.1  GTP-binding protein                           |                         |    |    |   |   |   |   |
|         |                        |                      |          |          |        |     |            |          |                                                           |                         |    |    |   |   |   |   |
| FN2014  | -0.887                 | 15.552               | 2.858e-5 | 1.561e-5 | 152    | 275 | 152.0000   | 311.2612 | AAL94104.1  ATP-dependent protease La                     |                         |    |    |   |   |   |   |
|         |                        |                      |          |          | 133    | 233 | 170.4048   | 284.8042 |                                                           |                         |    |    |   |   |   |   |

Show detected proteins only  
 Show all proteins  
 Filter by category:

Proteins found: 1297

Enter (or paste) list of ORFs

Find ORFs

Test Cutoff

q-Value p-Value

.005

| Signif | Direction | Applies To   |
|--------|-----------|--------------|
| yes    | +         | ratios, bars |
| no     | n/a       | bars         |
| yes    | -         | ratios, bars |
| yes    | +         | p-, q-Values |
| yes    | -         | p-, q-Values |

Dot Plots Dot Plots

Fn Summary Table FnPg vs Fn FnSg vs Fn FnPgSg vs Fn FnPgSg vs FnPg FnSg vs FnPg FnPgSg vs FnSg Fn Coverage

| Protein | FnPgSg vs Fn           |                      |          |          | Raw    |     | Normalized |          | Description                                                          | Log <sub>2</sub> Ratios |    |    |   |   |   |   |
|---------|------------------------|----------------------|----------|----------|--------|-----|------------|----------|----------------------------------------------------------------------|-------------------------|----|----|---|---|---|---|
|         | Log <sub>2</sub> Ratio | Log <sub>2</sub> Sum | q-Value  | p-Value  | FnPgSg | Fn  | FnPgSg     | Fn       |                                                                      | -6                      | -4 | -2 | 0 | 2 | 4 | 6 |
| FN2015  | -0.687                 | 13.402               | 3.541e-4 | 6.352e-4 | 73     | 108 | 73.0000    | 122.2408 | AAL94105.1  ATP-dependent clp protease ATP-binding subunit clpX      |                         |    |    |   |   |   |   |
|         |                        |                      |          |          | 71     | 116 | 90.9680    | 141.7909 |                                                                      |                         |    |    |   |   |   |   |
| FN2016  | -0.190                 | 10.782               | 3.211e-2 | 1.557e-1 | 35     | 36  | 35.0000    | 40.7469  | AAL94106.1  ATP-dependent Clp protease proteolytic subunit           |                         |    |    |   |   |   |   |
|         |                        |                      |          |          | 34     | 40  | 43.5621    | 48.8934  |                                                                      |                         |    |    |   |   |   |   |
| FN2017  | -0.023                 | 19.307               | 1.39e-1  | 8.169e-1 | 711    | 728 | 711.0000   | 823.9933 | AAL94107.1  Trigger factor, ppiase                                   |                         |    |    |   |   |   |   |
|         |                        |                      |          |          | 692    | 654 | 886.6177   | 799.4074 |                                                                      |                         |    |    |   |   |   |   |
| FN2018  | -0.729                 | 10.204               | 3.476e-4 | 6.186e-4 | 29     | 36  | 29.0000    | 40.7469  | AAL94108.1  Single-stranded-DNA-specific exonuclease recJ            |                         |    |    |   |   |   |   |
|         |                        |                      |          |          | 19     | 39  | 24.3435    | 47.6711  |                                                                      |                         |    |    |   |   |   |   |
| FN2019  | -0.674                 | 10.230               | 1.126e-2 | 4.709e-2 | 19     | 32  | 19.0000    | 36.2195  | AAL94109.1  Ribosome-binding factor A                                |                         |    |    |   |   |   |   |
|         |                        |                      |          |          | 28     | 42  | 35.8747    | 51.3381  |                                                                      |                         |    |    |   |   |   |   |
| FN2020  | -0.211                 | 16.009               | 6.937e-5 | 6.416e-5 | 243    | 242 | 243.0000   | 273.9099 | AAL94110.1  Bacterial Protein Translation Initiation Factor 2 (IF-2) |                         |    |    |   |   |   |   |
|         |                        |                      |          |          | 183    | 228 | 234.4668   | 278.6925 |                                                                      |                         |    |    |   |   |   |   |
| FN2022  | -0.503                 | 12.765               | 7.657e-6 | 2.177e-6 | 71     | 88  | 71.0000    | 99.6036  | AAL94112.1  N utilization substance protein A                        |                         |    |    |   |   |   |   |
|         |                        |                      |          |          | 54     | 81  | 69.1869    | 99.0092  |                                                                      |                         |    |    |   |   |   |   |
| FN2023  | 0.064                  | 6.716                | 1.182e-1 | 6.787e-1 | 12     | 8   | 12.0000    | 9.0549   | AAL94113.1  Hypothetical cytosolic protein                           |                         |    |    |   |   |   |   |
|         |                        |                      |          |          | 7      | 9   | 8.9687     | 11.0010  |                                                                      |                         |    |    |   |   |   |   |
| FN2030  | -0.842                 | 15.443               | 1.972e-4 | 2.842e-4 | 150    | 265 | 150.0000   | 299.9426 | AAL94115.1  Inorganic pyrophosphatase                                |                         |    |    |   |   |   |   |
|         |                        |                      |          |          | 129    | 217 | 165.2799   | 265.2468 |                                                                      |                         |    |    |   |   |   |   |
| FN2031  | -0.397                 | 7.612                | 5.555e-2 | 2.913e-1 | 9      | 10  | 9.0000     | 11.3186  | AAL94116.1  Thiamine biosynthesis lipoprotein apbE                   |                         |    |    |   |   |   |   |
|         |                        |                      |          |          | 12     | 17  | 15.3749    | 20.7797  |                                                                      |                         |    |    |   |   |   |   |
| FN2033  |                        |                      |          |          |        | 16  |            | 18.1097  | AAL94118.1  Guanylate kinase                                         |                         |    |    |   |   |   |   |
|         |                        |                      |          |          |        | 12  |            | 14.6680  |                                                                      |                         |    |    |   |   |   |   |
| FN2034  | 0.512                  | 9.490                | 4.057e-3 | 1.417e-2 | 32     | 17  | 32.0000    | 19.2416  | AAL94119.1  Protein yicC                                             |                         |    |    |   |   |   |   |
|         |                        |                      |          |          | 25     | 21  | 32.0310    | 25.6690  |                                                                      |                         |    |    |   |   |   |   |
| FN2035  | -0.320                 | 17.851               | 1.616e-4 | 2.134e-4 | 418    | 490 | 418.0000   | 554.6109 | AAL94120.1  DNA-directed RNA polymerase beta' chain                  |                         |    |    |   |   |   |   |
|         |                        |                      |          |          | 353    | 435 | 452.2775   | 531.7159 |                                                                      |                         |    |    |   |   |   |   |
| FN2036  | -0.543                 | 17.386               | 4.911e-4 | 9.764e-4 | 327    | 469 | 327.0000   | 530.8418 | AAL94121.1  DNA-directed RNA polymerase beta chain                   |                         |    |    |   |   |   |   |
|         |                        |                      |          |          | 280    | 383 | 358.7470   | 468.1545 |                                                                      |                         |    |    |   |   |   |   |
| FN2037  | 2.706                  | 21.921               | 2.355e-5 | 1.146e-5 | 4959   | 682 | 4959.0000  | 771.9278 | AAL94122.1  LSU ribosomal protein L12P (L7/L12)                      |                         |    |    |   |   |   |   |
|         |                        |                      |          |          | 4077   | 645 | 5223.6132  | 788.4064 |                                                                      |                         |    |    |   |   |   |   |
| FN2038  | 0.235                  | 16.942               | 3.202e-2 | 1.552e-1 | 383    | 242 | 383.0000   | 273.9099 | AAL94123.1  LSU ribosomal protein L10P                               |                         |    |    |   |   |   |   |
|         |                        |                      |          |          | 302    | 311 | 386.9343   | 380.1463 |                                                                      |                         |    |    |   |   |   |   |

Show detected proteins only  
 Show all proteins  
 Filter by category:

Proteins found: 1297

Enter (or paste) list of ORFs

Find ORFs

Test Cutoff

q-Value

p-Value

.005

| Signif | Direction | Applies To   |
|--------|-----------|--------------|
| yes    | +         | ratios, bars |
| no     | n/a       | bars         |
| yes    | -         | ratios, bars |
| yes    | +         | p-, q-Values |
| yes    | -         | p-, q-Values |

Dot Plots Dot Plots

Fn Summary Table FnPg vs Fn FnSg vs Fn FnPgSg vs Fn FnPgSg vs FnPg FnSg vs FnPg FnPgSg vs FnSg Fn Coverage

| Protein | FnPgSg vs Fn           |                      |          |          | Raw    |     | Normalized |          | Description                                             | Log <sub>2</sub> Ratios |    |    |   |   |   |   |
|---------|------------------------|----------------------|----------|----------|--------|-----|------------|----------|---------------------------------------------------------|-------------------------|----|----|---|---|---|---|
|         | Log <sub>2</sub> Ratio | Log <sub>2</sub> Sum | q-Value  | p-Value  | FnPgSg | Fn  | FnPgSg     | Fn       |                                                         | -6                      | -4 | -2 | 0 | 2 | 4 | 6 |
| FN2039  | -0.291                 | 16.964               | 2.548e-4 | 4.082e-4 | 316    | 349 | 316.0000   | 395.0188 | AAL94124.1  LSU ribosomal protein L1P                   |                         |    |    |   |   |   |   |
|         |                        |                      |          |          | 258    | 324 | 330.5598   | 396.0367 |                                                         |                         |    |    |   |   |   |   |
| FN2040  | 0.868                  | 14.519               | 2.292e-4 | 3.552e-4 | 223    | 114 | 223.0000   | 129.0319 | AAL94125.1  LSU ribosomal protein L11P                  |                         |    |    |   |   |   |   |
|         |                        |                      |          |          | 149    | 80  | 190.9047   | 97.7868  |                                                         |                         |    |    |   |   |   |   |
| FN2041  | -0.606                 | 10.671               | 3.983e-4 | 7.467e-4 | 36     | 47  | 36.0000    | 53.1974  | AAL94126.1  Transcription antitermination protein nusG  |                         |    |    |   |   |   |   |
|         |                        |                      |          |          | 23     | 38  | 29.4685    | 46.4487  |                                                         |                         |    |    |   |   |   |   |
| FN2047  | -2.902                 | 16.351               | 6.366e-8 | 2.144e-9 | 91     | 685 | 91.0000    | 775.3234 | AAL94131.1  Fusobacterium outer membrane protein family |                         |    |    |   |   |   |   |
|         |                        |                      |          |          | 94     | 659 | 120.4365   | 805.5191 |                                                         |                         |    |    |   |   |   |   |
| FN2048  | 0.155                  | 15.816               | 2.243e-2 | 1.027e-1 | 234    | 198 | 234.0000   | 224.1081 | AAL94132.1  Outer membrane protein                      |                         |    |    |   |   |   |   |
|         |                        |                      |          |          | 213    | 189 | 272.9040   | 231.0214 |                                                         |                         |    |    |   |   |   |   |
| FN2049  | -0.338                 | 16.247               | 1.241e-3 | 3.212e-3 | 231    | 270 | 231.0000   | 305.6019 | AAL94133.1  unknown                                     |                         |    |    |   |   |   |   |
|         |                        |                      |          |          | 207    | 263 | 265.2166   | 321.4742 |                                                         |                         |    |    |   |   |   |   |
| FN2050  | -0.104                 | 15.702               | 1.066e-1 | 6.041e-1 | 175    | 195 | 175.0000   | 220.7125 | AAL94134.1  Hypothetical membrane-spanning protein      |                         |    |    |   |   |   |   |
|         |                        |                      |          |          | 211    | 211 | 270.3415   | 257.9128 |                                                         |                         |    |    |   |   |   |   |
| FN2051  | 0.063                  | 14.226               | 5.06e-2  | 2.621e-1 | 142    | 113 | 142.0000   | 127.9001 | AAL94135.1  unknown                                     |                         |    |    |   |   |   |   |
|         |                        |                      |          |          | 110    | 117 | 140.9363   | 143.0133 |                                                         |                         |    |    |   |   |   |   |
| FN2052  | -0.813                 | 14.879               | 2.894e-5 | 1.594e-5 | 121    | 210 | 121.0000   | 237.6904 | AAL94136.1  unknown                                     |                         |    |    |   |   |   |   |
|         |                        |                      |          |          | 110    | 182 | 140.9363   | 222.4651 |                                                         |                         |    |    |   |   |   |   |
| FN2053  | 0.822                  | 12.787               | 1.662e-3 | 4.812e-3 | 98     | 61  | 98.0000    | 69.0434  | AAL94137.1  Serine/threonine sodium symporter           |                         |    |    |   |   |   |   |
|         |                        |                      |          |          | 98     | 47  | 125.5615   | 57.4498  |                                                         |                         |    |    |   |   |   |   |
| FN2054  | -0.004                 | 15.531               | 1.536e-1 | 9.185e-1 | 227    | 195 | 227.0000   | 220.7125 | AAL94138.1  Glucose-6-phosphate isomerase               |                         |    |    |   |   |   |   |
|         |                        |                      |          |          | 162    | 176 | 207.5608   | 215.1310 |                                                         |                         |    |    |   |   |   |   |
| FN2058  | -0.596                 | 16.919               | 8.122e-5 | 8.007e-5 | 269    | 374 | 269.0000   | 423.3152 | AAL94142.1  Fusobacterium outer membrane protein family |                         |    |    |   |   |   |   |
|         |                        |                      |          |          | 237    | 362 | 303.6537   | 442.4855 |                                                         |                         |    |    |   |   |   |   |
| FN2059  | 0.155                  | 15.816               | 2.243e-2 | 1.027e-1 | 234    | 198 | 234.0000   | 224.1081 | AAL94143.1  Outer membrane protein                      |                         |    |    |   |   |   |   |
|         |                        |                      |          |          | 213    | 189 | 272.9040   | 231.0214 |                                                         |                         |    |    |   |   |   |   |
| FN2060  | -0.338                 | 16.247               | 1.241e-3 | 3.212e-3 | 231    | 270 | 231.0000   | 305.6019 | AAL94144.1  unknown                                     |                         |    |    |   |   |   |   |
|         |                        |                      |          |          | 207    | 263 | 265.2166   | 321.4742 |                                                         |                         |    |    |   |   |   |   |
| FN2061  | -0.104                 | 15.702               | 1.066e-1 | 6.041e-1 | 175    | 195 | 175.0000   | 220.7125 | AAL94145.1  Hypothetical membrane-spanning protein      |                         |    |    |   |   |   |   |
|         |                        |                      |          |          | 211    | 211 | 270.3415   | 257.9128 |                                                         |                         |    |    |   |   |   |   |
| FN2062  | 0.063                  | 14.226               | 5.06e-2  | 2.621e-1 | 142    | 113 | 142.0000   | 127.9001 | AAL94146.1  unknown                                     |                         |    |    |   |   |   |   |
|         |                        |                      |          |          | 110    | 117 | 140.9363   | 143.0133 |                                                         |                         |    |    |   |   |   |   |

Show detected proteins only  
 Show all proteins  
 Filter by category:

Proteins found: 1297

Enter (or paste) list of ORFs

Find ORFs

Test Cutoff

q-Value

p-Value

.005

| Signif | Direction | Applies To   |
|--------|-----------|--------------|
| yes    | +         | ratios, bars |
| no     | n/a       | bars         |
| yes    | -         | ratios, bars |
| yes    | +         | p-, q-Values |
| yes    | -         | p-, q-Values |

Dot Plots Dot Plots

Fn Summary Table FnPg vs Fn FnSg vs Fn FnPgSg vs Fn FnPgSg vs FnPg FnSg vs FnPg FnPgSg vs FnSg Fn Coverage

| Protein | FnPgSg vs Fn           |                      |          |          | Raw    |      | Normalized |           | Description                                           | Log <sub>2</sub> Ratios |    |    |   |   |   |   |
|---------|------------------------|----------------------|----------|----------|--------|------|------------|-----------|-------------------------------------------------------|-------------------------|----|----|---|---|---|---|
|         | Log <sub>2</sub> Ratio | Log <sub>2</sub> Sum | q-Value  | p-Value  | FnPgSg | Fn   | FnPgSg     | Fn        |                                                       | -6                      | -4 | -2 | 0 | 2 | 4 | 6 |
| FN2063  | -0.813                 | 14.879               | 2.894e-5 | 1.594e-5 | 121    | 210  | 121.0000   | 237.6904  | AAL94147.1  unknown                                   |                         |    |    |   |   |   |   |
|         |                        |                      |          |          | 110    | 182  | 140.9363   | 222.4651  |                                                       |                         |    |    |   |   |   |   |
| FN2067  | 0.925                  | 6.547                | 1.012e-2 | 4.178e-2 | 10     | 7    | 10.0000    | 7.9230    | AAL94151.1  Thiol:disulfide interchange protein tlpA  |                         |    |    |   |   |   |   |
|         |                        |                      |          |          | 13     | 5    | 16.6561    | 6.1117    |                                                       |                         |    |    |   |   |   |   |
| FN2068  | -0.690                 | 4.690                |          |          | 4      | 6    | 4.0000     | 6.7912    | AAL94152.1  dGTP triphosphohydrolase                  |                         |    |    |   |   |   |   |
|         |                        |                      |          |          |        | 5    |            | 6.1117    |                                                       |                         |    |    |   |   |   |   |
| FN2069  |                        |                      |          |          |        | 4    |            | 4.8893    | AAL94153.1  Amino acid carrier protein alsT           |                         |    |    |   |   |   |   |
|         |                        |                      |          |          |        |      |            |           |                                                       |                         |    |    |   |   |   |   |
| FN2070  | -2.188                 | 6.188                |          |          | 4      | 16   | 4.0000     | 18.1097   | AAL94154.1  Cobyric acid synthase                     |                         |    |    |   |   |   |   |
|         |                        |                      |          |          |        | 15   |            | 18.3350   |                                                       |                         |    |    |   |   |   |   |
| FN2073  | -0.859                 | 7.618                | 1.318e-3 | 3.504e-3 | 8      | 15   | 8.0000     | 16.9779   | AAL94157.1  Adenine phosphoribosyltransferase         |                         |    |    |   |   |   |   |
|         |                        |                      |          |          | 10     | 17   | 12.8124    | 20.7797   |                                                       |                         |    |    |   |   |   |   |
| FN2074  |                        |                      |          |          | 4      |      |            | 5.1250    | AAL94158.1  BslIM                                     |                         |    |    |   |   |   |   |
|         |                        |                      |          |          |        |      |            |           |                                                       |                         |    |    |   |   |   |   |
| FN2075  | -0.932                 | 10.677               | 8.5e-4   | 1.941e-3 | 24     | 48   | 24.0000    | 54.3292   | AAL94159.1  Hypothetical protein                      |                         |    |    |   |   |   |   |
|         |                        |                      |          |          | 27     | 47   | 34.5935    | 57.4498   |                                                       |                         |    |    |   |   |   |   |
| FN2076  |                        |                      |          |          |        |      |            |           | AAL94160.1  MunI regulatory protein                   |                         |    |    |   |   |   |   |
|         |                        |                      |          |          | 3      |      | 3.8437     |           |                                                       |                         |    |    |   |   |   |   |
| FN2078  |                        |                      |          |          |        | 4    |            | 4.5274    | AAL94162.1  Transcriptional regulator, DeoR family    |                         |    |    |   |   |   |   |
|         |                        |                      |          |          |        |      |            |           |                                                       |                         |    |    |   |   |   |   |
| FN2081  |                        |                      |          |          |        | 20   |            | 22.6372   | AAL94165.1  ABC transporter substrate-binding protein |                         |    |    |   |   |   |   |
|         |                        |                      |          |          |        | 17   |            | 20.7797   |                                                       |                         |    |    |   |   |   |   |
| FN2082  | 0.006                  | 20.575               | 1.619e-1 | 9.778e-1 | 1557   | 1045 | 1557.0000  | 1182.7926 | AAL94166.1  Formate--tetrahydrofolate ligase          |                         |    |    |   |   |   |   |
|         |                        |                      |          |          | 740    | 1073 | 948.1172   | 1311.5660 |                                                       |                         |    |    |   |   |   |   |
| FN2093  | -0.781                 | 10.254               | 4.272e-3 | 1.511e-2 | 20     | 41   | 20.0000    | 46.4062   | AAL94177.1  General secretion pathway protein G       |                         |    |    |   |   |   |   |
|         |                        |                      |          |          | 26     | 37   | 33.3122    | 45.2264   |                                                       |                         |    |    |   |   |   |   |
| FN2098  |                        |                      |          |          | 3      |      | 3.0000     |           | AAL94182.1  MRP-family nucleotide-binding protein     |                         |    |    |   |   |   |   |
|         |                        |                      |          |          |        |      |            |           |                                                       |                         |    |    |   |   |   |   |
| FN2100  | -0.577                 | 11.371               | 6.915e-6 | 1.863e-6 | 42     | 56   | 42.0000    | 63.3841   | AAL94184.1  Hypothetical protein                      |                         |    |    |   |   |   |   |
|         |                        |                      |          |          | 33     | 51   | 42.2809    | 62.3391   |                                                       |                         |    |    |   |   |   |   |
| FN2102  | -1.320                 | 7.629                | 1.419e-3 | 3.898e-3 | 5      | 22   | 5.0000     | 24.9009   | AAL94186.1  ABC transporter ATP-binding protein       |                         |    |    |   |   |   |   |
|         |                        |                      |          |          | 10     | 16   | 12.8124    | 19.5574   |                                                       |                         |    |    |   |   |   |   |

Show detected proteins only  
 Show all proteins  
 Filter by category:

Proteins found: 1297

Enter (or paste) list of ORFs

Find ORFs

Test Cutoff

q-Value p-Value

.005

| Signif      | Direction | Applies To |
|-------------|-----------|------------|
| red         | yes       | +          |
| yellow      | no        | n/a        |
| green       | yes       | -          |
| pink        | yes       | +          |
| light green | yes       | -          |

Applies To: ratios, bars; ratios, bars; p-, q-Values

Dot Plots Dot Plots



Fn Summary Table FnPg vs Fn FnSg vs Fn FnPgSg vs Fn FnPgSg vs FnPg FnSg vs FnPg FnPgSg vs FnSg Fn Coverage

| Protein | FnPgSg vs Fn           |                      |          |          | Raw    |     | Normalized |          | Description                                                    | Log <sub>2</sub> Ratios |    |    |   |   |   |   |
|---------|------------------------|----------------------|----------|----------|--------|-----|------------|----------|----------------------------------------------------------------|-------------------------|----|----|---|---|---|---|
|         | Log <sub>2</sub> Ratio | Log <sub>2</sub> Sum | q-Value  | p-Value  | FnPgSg | Fn  | FnPgSg     | Fn       |                                                                | -6                      | -4 | -2 | 0 | 2 | 4 | 6 |
| FN2103  | -0.354                 | 19.448               | 2.946e-4 | 4.93e-4  | 788    | 873 | 788.0000   | 988.1129 | AAL94187.1  tricarboxylate-binding protein                     |                         |    |    |   |   |   |   |
|         |                        |                      |          |          | 553    | 756 | 708.5254   | 924.0856 |                                                                |                         |    |    |   |   |   |   |
| FN2105  | 0.010                  | 7.103                | 1.571e-1 | 9.434e-1 | 12     | 12  | 12.0000    | 13.5823  | AAL94189.1  tricarboxylate transport membrane protein RctA     |                         |    |    |   |   |   |   |
|         |                        |                      |          |          | 9      | 8   | 11.5312    | 9.7787   |                                                                |                         |    |    |   |   |   |   |
| FN2106  | -0.334                 | 14.087               | 9.885e-4 | 2.356e-3 | 112    | 131 | 112.0000   | 148.2735 | AAL94190.1  Transporter                                        |                         |    |    |   |   |   |   |
|         |                        |                      |          |          | 96     | 121 | 122.9990   | 147.9026 |                                                                |                         |    |    |   |   |   |   |
| FN2107  | -0.627                 | 12.192               | 4.277e-3 | 1.513e-2 | 55     | 66  | 55.0000    | 74.7027  | AAL94191.1  Galactokinase                                      |                         |    |    |   |   |   |   |
|         |                        |                      |          |          | 43     | 78  | 55.0933    | 95.3422  |                                                                |                         |    |    |   |   |   |   |
| FN2108  | -0.390                 | 10.391               | 1.343e-2 | 5.75e-2  | 32     | 32  | 32.0000    | 36.2195  | AAL94192.1  Galactose-1-phosphate uridylyltransferase          |                         |    |    |   |   |   |   |
|         |                        |                      |          |          | 25     | 39  | 32.0310    | 47.6711  |                                                                |                         |    |    |   |   |   |   |
| FN2109  | 0.186                  | 11.674               | 2.964e-3 | 9.74e-3  | 63     | 45  | 63.0000    | 50.9337  | AAL94193.1  UDP-glucose 4-epimerase                            |                         |    |    |   |   |   |   |
|         |                        |                      |          |          | 46     | 46  | 58.9370    | 56.2274  |                                                                |                         |    |    |   |   |   |   |
| FN2116  | -3.826                 | 8.850                | 9.781e-5 | 1.053e-4 | 5      | 76  | 5.0000     | 86.0213  | AAL94200.1  Hypothetical exported 24-amino acid repeat protein |                         |    |    |   |   |   |   |
|         |                        |                      |          |          | 5      | 62  | 6.4062     | 75.7848  |                                                                |                         |    |    |   |   |   |   |
| FN2117  |                        |                      |          |          |        | 23  |            | 26.0328  | AAL94201.1  Hypothetical exported 24-amino acid repeat protein |                         |    |    |   |   |   |   |
|         |                        |                      |          |          |        | 12  |            | 14.6680  |                                                                |                         |    |    |   |   |   |   |
| FN2118  | -1.537                 | 9.837                | 1.799e-4 | 2.482e-4 | 15     | 50  | 15.0000    | 56.5929  | AAL94202.1  Hypothetical exported 24-amino acid repeat protein |                         |    |    |   |   |   |   |
|         |                        |                      |          |          | 16     | 38  | 20.4998    | 46.4487  |                                                                |                         |    |    |   |   |   |   |
| FN2119  | -0.938                 | 9.237                | 1.852e-4 | 2.59e-4  | 15     | 32  | 15.0000    | 36.2195  | AAL94203.1  Hypothetical exported 24-amino acid repeat protein |                         |    |    |   |   |   |   |
|         |                        |                      |          |          | 16     | 26  | 20.4998    | 31.7807  |                                                                |                         |    |    |   |   |   |   |
| FN2120  |                        |                      |          |          |        | 24  |            | 27.1646  | AAL94204.1  Hypothetical exported 24-amino acid repeat protein |                         |    |    |   |   |   |   |
|         |                        |                      |          |          |        | 30  |            | 36.6701  |                                                                |                         |    |    |   |   |   |   |
| FN2121  | -1.244                 | 14.071               | 1.016e-5 | 3.242e-6 | 91     | 171 | 91.0000    | 193.5479 | AAL94205.1  Hypothetical exported 24-amino acid repeat protein |                         |    |    |   |   |   |   |
|         |                        |                      |          |          | 62     | 172 | 79.4368    | 210.2417 |                                                                |                         |    |    |   |   |   |   |
| FN2122  | -0.165                 | 16.415               | 1.034e-2 | 4.28e-2  | 297    | 280 | 297.0000   | 316.9205 | AAL94206.1  Phenylalanyl-tRNA synthetase beta chain            |                         |    |    |   |   |   |   |
|         |                        |                      |          |          | 204    | 253 | 261.3728   | 309.2509 |                                                                |                         |    |    |   |   |   |   |
| FN2123  | -0.650                 | 12.469               | 1.363e-3 | 3.681e-3 | 60     | 77  | 60.0000    | 87.1531  | AAL94207.1  Phenylalanyl-tRNA synthetase alpha chain           |                         |    |    |   |   |   |   |
|         |                        |                      |          |          | 47     | 83  | 60.2183    | 101.4538 |                                                                |                         |    |    |   |   |   |   |
| FN2125  | -1.679                 | 13.325               | 1.06e-5  | 3.434e-6 | 53     | 154 | 53.0000    | 174.3063 | AAL94209.1  DNA gyrase subunit A                               |                         |    |    |   |   |   |   |
|         |                        |                      |          |          | 47     | 154 | 60.2183    | 188.2397 |                                                                |                         |    |    |   |   |   |   |
| FN2126  | -0.407                 | 13.107               | 3.654e-4 | 6.646e-4 | 85     | 95  | 85.0000    | 107.5266 | AAL94210.1  DNA gyrase subunit B                               |                         |    |    |   |   |   |   |
|         |                        |                      |          |          | 61     | 89  | 78.1556    | 108.7879 |                                                                |                         |    |    |   |   |   |   |

Show detected proteins only  
 Show all proteins  
 Filter by category:

Proteins found: 1297

Enter (or paste) list of ORFs

Find ORFs

Test Cutoff

q-Value p-Value

.005

| Signif | Direction | Applies To   |
|--------|-----------|--------------|
| yes    | +         | ratios, bars |
| no     | n/a       | bars         |
| yes    | -         | ratios, bars |
| yes    | +         | p-, q-Values |
| yes    | -         | p-, q-Values |

Dot Plots Dot Plots

| Protein       | <i>FnPgSg vs Fn</i>    |                      |         |         | Raw           |           | Normalized    |           | Description              | Log <sub>2</sub> Ratios |    |    |   |   |   |   |
|---------------|------------------------|----------------------|---------|---------|---------------|-----------|---------------|-----------|--------------------------|-------------------------|----|----|---|---|---|---|
|               | Log <sub>2</sub> Ratio | Log <sub>2</sub> Sum | q-Value | p-Value | <i>FnPgSg</i> | <i>Fn</i> | <i>FnPgSg</i> | <i>Fn</i> |                          | -6                      | -4 | -2 | 0 | 2 | 4 | 6 |
| <b>FN2128</b> |                        |                      |         |         |               | 3         |               | 3.3956    | AAL94212.1  RECF protein |                         |    |    |   |   |   |   |

- Show detected proteins only
- Show all proteins

Proteins found:  
1297

Filter by category:

GO: amino acid transport

Enter (or  
paste) list  
of ORFs

Find ORFs

Test

q-Value

p-Value

Cutoff

.005

|             | Signif | Direction | Applies To   |
|-------------|--------|-----------|--------------|
| red         | yes    | +         | ratios, bars |
| yellow      | no     | n/a       | bars         |
| green       | yes    | -         | ratios, bars |
| pink        | yes    | +         | p-, q-Values |
| light green | yes    | -         | p-, q-Values |

Dot Plots

Dot Plots
