# Supplementary material for: Proteomics of Fusobacterium nucleatum within a model developing oral microbial community
Source: PubMed Central journal article supplement (PMC4234264; doi:10.1002/mbo3.204), 2014-08-25
Supplement: mbo30003-0729-sd6.pdf [file mbo30003-0729-sd6.pdf]

Fn Summary Table

FnPg vs Fn

FnSg vs Fn

FnPgSg vs Fn

FnPgSg vs FnPg

FnSg vs FnPg

FnPgSg vs FnSg

Fn Coverage

| Protein | FnPg vs Fn             |                      |          |          | Raw  |    | Normalized |         | Description                                                    | Log <sub>2</sub> Ratios |    |    |   |   |   |   |
|---------|------------------------|----------------------|----------|----------|------|----|------------|---------|----------------------------------------------------------------|-------------------------|----|----|---|---|---|---|
|         | Log <sub>2</sub> Ratio | Log <sub>2</sub> Sum | q-Value  | p-Value  | FnPg | Fn | FnPg       | Fn      |                                                                | -6                      | -4 | -2 | 0 | 2 | 4 | 6 |
| FN0001  | -0.861                 | 8.211                | 5.373e-2 | 9.891e-2 | 15   | 22 | 20.5521    | 26.7235 | AAL94214.1  Chromosomal replication initiator protein dnaA     |                         |    |    |   |   |   |   |
|         |                        |                      |          |          | 5    | 15 | 5.0000     | 19.6771 |                                                                |                         |    |    |   |   |   |   |
| FN0004  | -0.611                 | 11.841               |          |          |      | 66 |            | 80.1706 | AAL94217.1  Inner membrane protein                             |                         |    |    |   |   |   |   |
|         |                        |                      |          |          | 49   | 53 | 49.0000    | 69.5257 |                                                                |                         |    |    |   |   |   |   |
| FN0005  | -2.353                 | 9.381                | 1.156e-3 | 5.965e-4 | 5    | 41 | 6.8507     | 49.8030 | AAL94218.1  Jag protein                                        |                         |    |    |   |   |   |   |
|         |                        |                      |          |          | 16   | 51 | 16.0000    | 66.9021 |                                                                |                         |    |    |   |   |   |   |
| FN0006  | -0.118                 | 8.902                |          |          |      | 17 |            | 20.6500 | AAL94219.1  Thiophene and furan oxidation protein THDF         |                         |    |    |   |   |   |   |
|         |                        |                      |          |          | 21   | 19 | 21.0000    | 24.9243 |                                                                |                         |    |    |   |   |   |   |
| FN0007  | -1.490                 | 8.166                | 7.004e-4 | 2.603e-4 | 6    | 23 | 8.2208     | 27.9382 | AAL94220.1  Glucose inhibited division protein A               |                         |    |    |   |   |   |   |
|         |                        |                      |          |          | 12   | 22 | 12.0000    | 28.8597 |                                                                |                         |    |    |   |   |   |   |
| FN0008  |                        |                      |          |          |      |    |            |         | AAL94221.1  Quinolinate synthetase A                           |                         |    |    |   |   |   |   |
|         |                        |                      |          |          | 13   |    | 13.0000    |         |                                                                |                         |    |    |   |   |   |   |
| FN0009  |                        |                      |          |          |      |    |            |         | AAL94222.1  L-aspartate oxidase                                |                         |    |    |   |   |   |   |
|         |                        |                      |          |          | 29   |    | 29.0000    |         |                                                                |                         |    |    |   |   |   |   |
| FN0017  |                        |                      |          |          |      | 6  |            | 7.2882  | AAL94230.1  Hypothetical protein                               |                         |    |    |   |   |   |   |
|         |                        |                      |          |          |      | 7  |            | 9.1826  |                                                                |                         |    |    |   |   |   |   |
| FN0018  | -1.322                 | 10.369               |          |          |      | 45 |            | 54.6618 | AAL94231.1  Hypothetical protein                               |                         |    |    |   |   |   |   |
|         |                        |                      |          |          | 23   | 46 | 23.0000    | 60.3430 |                                                                |                         |    |    |   |   |   |   |
| FN0019  |                        |                      |          |          |      |    |            |         | AAL94232.1  Transcription-repair coupling factor               |                         |    |    |   |   |   |   |
|         |                        |                      |          |          |      | 3  |            | 3.9354  |                                                                |                         |    |    |   |   |   |   |
| FN0021  |                        |                      |          |          |      |    |            |         | AAL94234.1  4-diphosphocytidyl-2-C-methyl-D-erythritol kinase  |                         |    |    |   |   |   |   |
|         |                        |                      |          |          |      | 5  |            | 6.5590  |                                                                |                         |    |    |   |   |   |   |
| FN0022  | 0.356                  | 12.744               | 2.373e-1 | 6.936e-1 | 128  | 59 | 175.3779   | 71.6677 | AAL94235.1  Hypothetical protein                               |                         |    |    |   |   |   |   |
|         |                        |                      |          |          | 12   | 57 | 12.0000    | 74.7729 |                                                                |                         |    |    |   |   |   |   |
| FN0023  |                        |                      |          |          |      |    |            |         | AAL94236.1  Short-chain fatty acids transporter                |                         |    |    |   |   |   |   |
|         |                        |                      |          |          | 11   |    | 11.0000    |         |                                                                |                         |    |    |   |   |   |   |
| FN0024  | -2.410                 | 10.338               | 2.211e-4 | 4.451e-5 | 6    | 75 | 8.2208     | 91.1030 | AAL94237.1  Hypothetical exported 24-amino acid repeat protein |                         |    |    |   |   |   |   |
|         |                        |                      |          |          | 23   | 57 | 23.0000    | 74.7729 |                                                                |                         |    |    |   |   |   |   |
| FN0025  | -2.614                 | 8.229                |          |          |      | 36 |            | 43.7294 | AAL94238.1  Hypothetical exported 24-amino acid repeat protein |                         |    |    |   |   |   |   |
|         |                        |                      |          |          | 7    | 32 | 7.0000     | 41.9778 |                                                                |                         |    |    |   |   |   |   |
| FN0026  |                        |                      |          |          |      | 9  |            | 10.9324 | AAL94239.1  Hypothetical exported 24-amino acid repeat protein |                         |    |    |   |   |   |   |
|         |                        |                      |          |          |      | 21 |            | 27.5479 |                                                                |                         |    |    |   |   |   |   |

Show detected proteins only  
 Show all proteins  
 Filter by category:

Proteins found: 1338

Test Cutoff

| Signif | Direction | Applies To   |
|--------|-----------|--------------|
| yes    | +         | ratios, bars |
| no     | n/a       | bars         |
| yes    | -         | ratios, bars |
| yes    | +         | p-, q-Values |
| yes    | -         |              |

Fn Summary Table

FnPg vs Fn

FnSg vs Fn

FnPgSg vs Fn

FnPgSg vs FnPg

FnSg vs FnPg

FnPgSg vs FnSg

Fn Coverage

| Protein | FnPg vs Fn             |                      |          |          | Raw  |      | Normalized |           | Description                                                              | Log <sub>2</sub> Ratios |    |    |   |   |   |   |
|---------|------------------------|----------------------|----------|----------|------|------|------------|-----------|--------------------------------------------------------------------------|-------------------------|----|----|---|---|---|---|
|         | Log <sub>2</sub> Ratio | Log <sub>2</sub> Sum | q-Value  | p-Value  | FnPg | Fn   | FnPg       | Fn        |                                                                          | -6                      | -4 | -2 | 0 | 2 | 4 | 6 |
| FN0029  |                        |                      |          |          |      | 7    |            | 8.5029    | AAL94242.1  Flavodoxin                                                   |                         |    |    |   |   |   |   |
|         |                        |                      |          |          |      | 9    |            | 11.8062   |                                                                          |                         |    |    |   |   |   |   |
| FN0030  | 0.941                  | 12.742               | 2.833e-2 | 4.197e-2 | 63   | 53   | 86.3188    | 64.3794   | AAL94243.1  5-nitroimidazole antibiotic resistance protein               |                         |    |    |   |   |   |   |
|         |                        |                      |          |          | 143  | 42   | 143.0000   | 55.0958   |                                                                          |                         |    |    |   |   |   |   |
| FN0031  | 1.926                  | 7.752                | 6.48e-3  | 6.475e-3 | 25   | 7    | 34.2535    | 8.5029    | AAL94244.1  unknown                                                      |                         |    |    |   |   |   |   |
|         |                        |                      |          |          | 23   | 5    | 23.0000    | 6.5590    |                                                                          |                         |    |    |   |   |   |   |
| FN0033  | -0.537                 | 12.649               | 5.583e-2 | 1.044e-1 | 65   | 79   | 89.0591    | 95.9618   | AAL94246.1  unknown                                                      |                         |    |    |   |   |   |   |
|         |                        |                      |          |          | 44   | 74   | 44.0000    | 97.0736   |                                                                          |                         |    |    |   |   |   |   |
| FN0034  | 0.033                  | 9.683                | 2.871e-1 | 8.979e-1 | 27   | 24   | 36.9938    | 29.1529   | AAL94247.1  unknown                                                      |                         |    |    |   |   |   |   |
|         |                        |                      |          |          | 21   | 21   | 21.0000    | 27.5479   |                                                                          |                         |    |    |   |   |   |   |
| FN0038  |                        |                      |          |          |      | 77   |            | 105.5008  | AAL94251.1  unknown                                                      |                         |    |    |   |   |   |   |
|         |                        |                      |          |          |      |      |            |           |                                                                          |                         |    |    |   |   |   |   |
| FN0039  | 0.032                  | 6.887                |          |          |      | 8    |            | 9.7176    | AAL94252.1  DNA primase (bacterial type) and small primase-like proteins |                         |    |    |   |   |   |   |
|         |                        |                      |          |          | 11   | 9    | 11.0000    | 11.8062   |                                                                          |                         |    |    |   |   |   |   |
| FN0040  | 0.040                  | 18.005               | 2.345e-1 | 6.828e-1 | 341  | 402  | 467.2177   | 488.3119  | AAL94253.1  Asparaginyl-tRNA synthetase                                  |                         |    |    |   |   |   |   |
|         |                        |                      |          |          | 573  | 399  | 573.0000   | 523.4103  |                                                                          |                         |    |    |   |   |   |   |
| FN0041  | -0.530                 | 6.145                |          |          |      | 8    |            | 9.7176    | AAL94254.1  unknown                                                      |                         |    |    |   |   |   |   |
|         |                        |                      |          |          | 7    | 8    | 7.0000     | 10.4944   |                                                                          |                         |    |    |   |   |   |   |
| FN0043  | -0.908                 | 6.908                |          |          |      | 15   |            | 18.2206   | AAL94256.1  Hypothetical exported 24-amino acid repeat protein           |                         |    |    |   |   |   |   |
|         |                        |                      |          |          | 8    | 9    | 8.0000     | 11.8062   |                                                                          |                         |    |    |   |   |   |   |
| FN0045  |                        |                      |          |          |      | 8    |            | 9.7176    | AAL94258.1  Shikimate 5-dehydrogenase                                    |                         |    |    |   |   |   |   |
|         |                        |                      |          |          |      | 8    |            | 10.4944   |                                                                          |                         |    |    |   |   |   |   |
| FN0046  | 0.453                  | 5.099                |          |          | 5    | 5    | 6.8507     | 6.0735    | AAL94259.1  3-dehydroquininate dehydratase                               |                         |    |    |   |   |   |   |
|         |                        |                      |          |          |      | 3    |            | 3.9354    |                                                                          |                         |    |    |   |   |   |   |
| FN0047  | -0.754                 | 12.407               | 6.949e-3 | 7.143e-3 | 50   | 82   | 68.5070    | 99.6059   | AAL94260.1  Exodeoxyribonuclease III                                     |                         |    |    |   |   |   |   |
|         |                        |                      |          |          | 45   | 70   | 45.0000    | 91.8264   |                                                                          |                         |    |    |   |   |   |   |
| FN0048  | -1.806                 | 9.090                | 4.751e-4 | 1.424e-4 | 8    | 33   | 10.9611    | 40.0853   | AAL94261.1  4-nitrophenylphosphatase                                     |                         |    |    |   |   |   |   |
|         |                        |                      |          |          | 14   | 36   | 14.0000    | 47.2250   |                                                                          |                         |    |    |   |   |   |   |
| FN0049  | 2.461                  | 6.414                |          |          | 9    |      | 12.3313    |           | AAL94262.1  Hypothetical protein                                         |                         |    |    |   |   |   |   |
|         |                        |                      |          |          | 31   | 3    | 31.0000    | 3.9354    |                                                                          |                         |    |    |   |   |   |   |
| FN0050  | -2.087                 | 19.021               | 5.604e-5 | 5.869e-6 | 194  | 1157 | 265.8071   | 1405.4151 | AAL94263.1  Fumarate reductase flavoprotein subunit                      |                         |    |    |   |   |   |   |
|         |                        |                      |          |          | 442  | 1221 | 442.0000   | 1601.7142 |                                                                          |                         |    |    |   |   |   |   |

- Show detected proteins only  
 Show all proteins

Filter by category:

GO: amino acid transport

Proteins found:  
1338

Enter (or  
paste) list  
of ORFs

Find ORFs

Test

Cutoff

q-Value

.005

p-Value

|             | Signif | Direction | Applies To   |
|-------------|--------|-----------|--------------|
| Red         | yes    | +         | ratios, bars |
| Yellow      | no     | n/a       | bars         |
| Green       | yes    | -         | ratios, bars |
| Pink        | yes    | +         | p-, q-Values |
| Light Green | yes    | -         | p-, q-Values |

Dot Plots

Dot Plots

Fn Summary Table

FnPg vs Fn

FnSg vs Fn

FnPgSg vs Fn

FnPgSg vs FnPg

FnSg vs FnPg

FnPgSg vs FnSg

Fn Coverage

| Protein | FnPg vs Fn             |                      |          |          | Raw  |     | Normalized |          | Description                                                                      | Log <sub>2</sub> Ratios |    |    |   |   |   |   |
|---------|------------------------|----------------------|----------|----------|------|-----|------------|----------|----------------------------------------------------------------------------------|-------------------------|----|----|---|---|---|---|
|         | Log <sub>2</sub> Ratio | Log <sub>2</sub> Sum | q-Value  | p-Value  | FnPg | Fn  | FnPg       | Fn       |                                                                                  | -6                      | -4 | -2 | 0 | 2 | 4 | 6 |
| FN0052  | -1.633                 | 9.711                |          |          | 12   | 44  | 16.4417    | 53.4471  | AAL94265.1  Arsenate reductase                                                   |                         |    |    |   |   |   |   |
|         |                        |                      |          |          |      |     |            | 37       |                                                                                  | 48.5368                 |    |    |   |   |   |   |
| FN0054  | -0.656                 | 14.433               | 4.46e-2  | 7.663e-2 | 54   | 153 | 73.9876    | 185.8501 | AAL94267.1  Tyrosyl-tRNA synthetase                                              |                         |    |    |   |   |   |   |
|         |                        |                      |          |          | 163  | 143 | 163.0000   | 187.5882 |                                                                                  |                         |    |    |   |   |   |   |
| FN0058  | -0.140                 | 15.152               | 1.373e-1 | 3.386e-1 | 153  | 171 | 209.6314   | 207.7148 | AAL94271.1  Cysteine desulphydrase                                               |                         |    |    |   |   |   |   |
|         |                        |                      |          |          | 154  | 147 | 154.0000   | 192.8354 |                                                                                  |                         |    |    |   |   |   |   |
| FN0059  | -1.187                 | 10.292               | 1.566e-3 | 9.088e-4 | 16   | 48  | 21.9222    | 58.3059  | AAL94272.1  NifU protein                                                         |                         |    |    |   |   |   |   |
|         |                        |                      |          |          | 25   | 37  | 25.0000    | 48.5368  |                                                                                  |                         |    |    |   |   |   |   |
| FN0060  | -1.856                 | 8.478                | 1.087e-3 | 5.368e-4 | 5    | 30  | 6.8507     | 36.4412  | AAL94273.1  D-alanyl-D-alanine carboxypeptidase                                  |                         |    |    |   |   |   |   |
|         |                        |                      |          |          | 13   | 27  | 13.0000    | 35.4187  |                                                                                  |                         |    |    |   |   |   |   |
| FN0061  | 0.092                  | 12.784               | 2.844e-1 | 8.859e-1 | 20   | 67  | 27.4028    | 81.3853  | AAL94274.1  Thermostable carboxypeptidase 1                                      |                         |    |    |   |   |   |   |
|         |                        |                      |          |          | 146  | 62  | 146.0000   | 81.3319  |                                                                                  |                         |    |    |   |   |   |   |
| FN0062  | -0.934                 | 6.104                |          |          |      | 7   |            | 8.5029   | AAL94275.1  Hypothetical cytosolic protein                                       |                         |    |    |   |   |   |   |
|         |                        |                      |          |          | 6    | 11  | 6.0000     | 14.4299  |                                                                                  |                         |    |    |   |   |   |   |
| FN0065  | -1.267                 | 13.695               | 4.057e-4 | 1.097e-4 | 50   | 157 | 68.5070    | 190.7089 | AAL94278.1  Transcription accessory protein (S1 RNA binding domain)              |                         |    |    |   |   |   |   |
|         |                        |                      |          |          | 80   | 127 | 80.0000    | 166.5993 |                                                                                  |                         |    |    |   |   |   |   |
| FN0067  | -0.988                 | 17.171               | 2.064e-3 | 1.353e-3 | 234  | 434 | 320.6127   | 527.1825 | AAL94280.1  Isoleucyl-tRNA synthetase                                            |                         |    |    |   |   |   |   |
|         |                        |                      |          |          | 225  | 423 | 225.0000   | 554.8936 |                                                                                  |                         |    |    |   |   |   |   |
| FN0069  | 0.373                  | 15.301               | 6.215e-2 | 1.221e-1 | 198  | 159 | 271.2877   | 193.1383 | AAL94282.1  Glycyl-tRNA synthetase alpha chain                                   |                         |    |    |   |   |   |   |
|         |                        |                      |          |          | 186  | 122 | 186.0000   | 160.0402 |                                                                                  |                         |    |    |   |   |   |   |
| FN0070  | -0.301                 | 17.538               | 4.828e-2 | 8.539e-2 | 241  | 390 | 330.2037   | 473.7354 | AAL94283.1  Glycyl-tRNA synthetase beta chain                                    |                         |    |    |   |   |   |   |
|         |                        |                      |          |          | 456  | 377 | 456.0000   | 494.5506 |                                                                                  |                         |    |    |   |   |   |   |
| FN0071  | -0.392                 | 6.392                |          |          |      |     |            |          | AAL94284.1  GTP cyclohydrolase I                                                 |                         |    |    |   |   |   |   |
|         |                        |                      |          |          | 8    | 8   | 8.0000     | 10.4944  |                                                                                  |                         |    |    |   |   |   |   |
| FN0072  | 0.159                  | 12.943               | 2.316e-1 | 6.721e-1 | 42   | 67  | 57.5459    | 81.3853  | AAL94285.1  2-amino-4-hydroxy-6-hydroxymethylidihydropteridine pyrophosphokinase |                         |    |    |   |   |   |   |
|         |                        |                      |          |          | 130  | 66  | 130.0000   | 86.5791  |                                                                                  |                         |    |    |   |   |   |   |
| FN0073  | -0.702                 | 10.009               | 6.226e-2 | 1.224e-1 | 9    | 35  | 12.3313    | 42.5147  | AAL94286.1  Dihydropteroate synthase                                             |                         |    |    |   |   |   |   |
|         |                        |                      |          |          | 38   | 30  | 38.0000    | 39.3542  |                                                                                  |                         |    |    |   |   |   |   |
| FN0074  | -0.272                 | 8.272                |          |          |      | 21  |            | 25.5088  | AAL94287.1  Ethanolamine utilization protein eutS                                |                         |    |    |   |   |   |   |
|         |                        |                      |          |          | 16   | 10  | 16.0000    | 13.1181  |                                                                                  |                         |    |    |   |   |   |   |
| FN0076  |                        |                      |          |          |      |     |            |          | AAL94289.1  Ethanolamine two-component response regulator                        |                         |    |    |   |   |   |   |
|         |                        |                      |          |          | 4    |     | 4.0000     |          |                                                                                  |                         |    |    |   |   |   |   |

Show detected proteins only  
 Show all proteins  
 Filter by category:

Proteins found: 1338

Enter (or paste) list of ORFs

Find ORFs

Test Cutoff

q-Value

p-Value

.005

| Signif | Direction | Applies To   |
|--------|-----------|--------------|
| yes    | +         | ratios, bars |
| no     | n/a       | bars         |
| yes    | -         | ratios, bars |
| yes    | +         | p-, q-Values |
| yes    | -         | p-, q-Values |

Dot Plots Dot Plots

Fn Summary Table

FnPg vs Fn

FnSg vs Fn

FnPgSg vs Fn

FnPgSg vs FnPg

FnSg vs FnPg

FnPgSg vs FnSg

Fn Coverage

| Protein       | FnPg vs Fn             |                      |          |          | Raw  |     | Normalized |          | Description                                                 | Log <sub>2</sub> Ratios |    |    |   |   |   |   |
|---------------|------------------------|----------------------|----------|----------|------|-----|------------|----------|-------------------------------------------------------------|-------------------------|----|----|---|---|---|---|
|               | Log <sub>2</sub> Ratio | Log <sub>2</sub> Sum | q-Value  | p-Value  | FnPg | Fn  | FnPg       | Fn       |                                                             | -6                      | -4 | -2 | 0 | 2 | 4 | 6 |
| <b>FN0077</b> | -1.392                 | 4.561                |          |          | 3    | 6   | 3.0000     | 7.8708   | AAL94290.1  Ethanolamine two-component sensor kinase        |                         |    |    |   |   |   |   |
| <b>FN0078</b> | 1.882                  | 7.835                |          |          | 19   |     | 26.0327    |          | AAL94291.1  Ethanolamine utilization protein eutA           |                         |    |    |   |   |   |   |
| <b>FN0079</b> | 0.842                  | 14.037               | 1.25e-1  | 3.005e-1 | 49   | 86  | 67.1369    | 104.4647 | AAL94292.1  Ethanolamine ammonia-lyase heavy chain          |                         |    |    |   |   |   |   |
| <b>FN0080</b> | 0.902                  | 14.623               | 4.69e-4  | 1.392e-4 | 163  | 106 | 223.3328   | 128.7589 | AAL94293.1  Ethanolamine ammonia-lyase light chain          |                         |    |    |   |   |   |   |
| <b>FN0081</b> | 1.042                  | 14.363               | 7.517e-2 | 1.565e-1 | 80   | 78  | 109.6112   | 94.7471  | AAL94294.1  Ethanolamine utilization protein eutL           |                         |    |    |   |   |   |   |
| <b>FN0082</b> | 1.056                  | 8.758                |          |          | 30   | 11  | 30.0000    | 14.4299  | AAL94295.1  Ethanolamine utilization protein eutM           |                         |    |    |   |   |   |   |
| <b>FN0083</b> | 1.151                  | 15.460               | 6.376e-2 | 1.263e-1 | 126  | 132 | 172.6376   | 160.3412 | AAL94296.1  Ethanolamine utilization protein eutM precursor |                         |    |    |   |   |   |   |
| <b>FN0084</b> | 0.119                  | 10.872               | 4.019e-2 | 6.639e-2 | 33   | 36  | 45.2146    | 43.7294  | AAL94297.1  Acetaldehyde dehydrogenase (acetylating)        |                         |    |    |   |   |   |   |
| <b>FN0086</b> |                        |                      |          |          | 7    |     | 9.5910     |          | AAL94299.1  Hypothetical protein                            |                         |    |    |   |   |   |   |
| <b>FN0087</b> |                        |                      |          |          | 13   |     | 17.8118    |          | AAL94300.1  Ethanolamine utilization protein eutN           |                         |    |    |   |   |   |   |
| <b>FN0088</b> |                        |                      |          |          |      | 4   | 5.2472     |          | AAL94301.1  Hypothetical protein                            |                         |    |    |   |   |   |   |
| <b>FN0090</b> |                        |                      |          |          | 9    |     | 12.3313    |          | AAL94303.1  Ethanolamine utilization protein eutQ           |                         |    |    |   |   |   |   |
| <b>FN0091</b> |                        |                      |          |          | 6    |     | 8.2208     |          | AAL94304.1  Phosphoserine phosphatase                       |                         |    |    |   |   |   |   |
| <b>FN0092</b> | 0.492                  | 10.680               | 1.89e-1  | 5.192e-1 | 11   | 26  | 15.0715    | 31.5824  | AAL94305.1  NADPH-dependent butanol dehydrogenase           |                         |    |    |   |   |   |   |
| <b>FN0093</b> | -0.842                 | 16.090               | 4.414e-3 | 3.817e-3 | 153  | 323 | 209.6314   | 392.3501 | AAL94306.1  Thioredoxin                                     |                         |    |    |   |   |   |   |
| <b>FN100</b>  | -1.317                 | 9.040                | 1.103e-2 | 1.274e-2 | 11   | 24  | 15.0715    | 29.1529  | AAL94309.1  Flavodoxins/hemoproteins                        |                         |    |    |   |   |   |   |

- Show detected proteins only
- Show all proteins

Filter by category:  
GO: amino acid transport

Proteins found:  
1338

Enter (or paste) list of ORFs

Find ORFs

Test

Cutoff

q-Value

p-Value

.005

| Signif | Direction | Applies To   |
|--------|-----------|--------------|
| yes    | +         | ratios, bars |
| no     | n/a       | bars         |
| yes    | -         | ratios, bars |
| yes    | +         | p-, q-Values |
| yes    | -         | p-, q-Values |

Dot Plots Dot Plots

Fn Summary Table

FnPg vs Fn

FnSg vs Fn

FnPgSg vs Fn

FnPgSg vs FnPg

FnSg vs FnPg

FnPgSg vs FnSg

Fn Coverage

| Protein | FnPg vs Fn             |                      |          |          | Raw  |     | Normalized |           | Description                                                  | Log <sub>2</sub> Ratios |    |    |   |   |   |   |
|---------|------------------------|----------------------|----------|----------|------|-----|------------|-----------|--------------------------------------------------------------|-------------------------|----|----|---|---|---|---|
|         | Log <sub>2</sub> Ratio | Log <sub>2</sub> Sum | q-Value  | p-Value  | FnPg | Fn  | FnPg       | Fn        |                                                              | -6                      | -4 | -2 | 0 | 2 | 4 | 6 |
| FN0102  |                        |                      |          |          |      | 12  |            | 14.5765   | AAL94311.1  Ribonucleoside-diphosphate reductase alpha chain |                         |    |    |   |   |   |   |
|         |                        |                      |          |          |      | 11  |            | 14.4299   |                                                              |                         |    |    |   |   |   |   |
| FN0103  |                        |                      |          |          |      | 7   |            | 8.5029    | AAL94312.1  Ribonucleoside-diphosphate reductase beta chain  |                         |    |    |   |   |   |   |
|         |                        |                      |          |          |      | 8   |            | 10.4944   |                                                              |                         |    |    |   |   |   |   |
| FN0106  | 0.481                  | 13.751               | 4.514e-3 | 3.942e-3 | 93   | 87  | 127.4230   | 105.6794  | AAL94315.1  Hypothetical protein                             |                         |    |    |   |   |   |   |
|         |                        |                      |          |          | 150  | 71  | 150.0000   | 93.1382   |                                                              |                         |    |    |   |   |   |   |
| FN0108  | 1.611                  | 7.947                | 4.839e-3 | 4.367e-3 | 16   | 4   | 21.9222    | 4.8588    | AAL94317.1  Microcin C7 self-immunity protein mccF           |                         |    |    |   |   |   |   |
|         |                        |                      |          |          | 33   | 10  | 33.0000    | 13.1181   |                                                              |                         |    |    |   |   |   |   |
| FN0110  | 0.226                  | 17.666               | 1.41e-1  | 3.503e-1 | 442  | 352 | 605.6018   | 427.5766  | AAL94319.1  Seryl-tRNA synthetase                            |                         |    |    |   |   |   |   |
|         |                        |                      |          |          | 381  | 317 | 381.0000   | 415.8423  |                                                              |                         |    |    |   |   |   |   |
| FN0111  |                        |                      |          |          |      |     |            |           | AAL94320.1  unknown                                          |                         |    |    |   |   |   |   |
|         |                        |                      |          |          | 5    |     | 5.0000     |           |                                                              |                         |    |    |   |   |   |   |
| FN0113  | 0.647                  | 11.693               | 1.201e-2 | 1.411e-2 | 46   | 39  | 63.0264    | 47.3735   | AAL94322.1  Heat-inducible transcription repressor hrcA      |                         |    |    |   |   |   |   |
|         |                        |                      |          |          | 81   | 34  | 81.0000    | 44.6014   |                                                              |                         |    |    |   |   |   |   |
| FN0114  | -0.198                 | 13.784               | 6.152e-3 | 6.025e-3 | 83   | 109 | 113.7216   | 132.4030  | AAL94323.1  GrpE protein                                     |                         |    |    |   |   |   |   |
|         |                        |                      |          |          | 108  | 93  | 108.0000   | 121.9979  |                                                              |                         |    |    |   |   |   |   |
| FN0116  | 0.278                  | 20.274               | 1.647e-1 | 4.297e-1 | 604  | 797 | 827.5645   | 968.1209  | AAL94325.1  Chaperone protein dnaK                           |                         |    |    |   |   |   |   |
|         |                        |                      |          |          | 1653 | 821 | 1653.0000  | 1076.9921 |                                                              |                         |    |    |   |   |   |   |
| FN0117  | 1.094                  | 6.521                |          |          |      |     |            |           | AAL94326.1  O6-methylguanine-DNA methyltransferase           |                         |    |    |   |   |   |   |
|         |                        |                      |          |          | 14   | 5   | 14.0000    | 6.5590    |                                                              |                         |    |    |   |   |   |   |
| FN0118  | -0.984                 | 12.145               | 2.653e-3 | 1.89e-3  | 29   | 77  | 39.7341    | 93.5324   | AAL94327.1  Chaperone protein dnaJ                           |                         |    |    |   |   |   |   |
|         |                        |                      |          |          | 56   | 73  | 56.0000    | 95.7618   |                                                              |                         |    |    |   |   |   |   |
| FN0119  | 1.972                  | 9.137                |          |          |      | 10  |            | 12.1471   | AAL94328.1  Flavodoxin                                       |                         |    |    |   |   |   |   |
|         |                        |                      |          |          | 47   | 9   | 47.0000    | 11.8062   |                                                              |                         |    |    |   |   |   |   |
| FN0123  | -0.480                 | 5.124                |          |          |      | 5   |            | 6.0735    | AAL94332.1  ATPase                                           |                         |    |    |   |   |   |   |
|         |                        |                      |          |          | 5    | 6   | 5.0000     | 7.8708    |                                                              |                         |    |    |   |   |   |   |
| FN0127  |                        |                      |          |          | 4    |     | 5.4806     |           | AAL94333.1  Fe-S oxidoreductase                              |                         |    |    |   |   |   |   |
|         |                        |                      |          |          |      |     |            |           |                                                              |                         |    |    |   |   |   |   |
| FN0128  | -0.982                 | 9.077                | 3.37e-3  | 2.639e-3 | 11   | 30  | 15.0715    | 36.4412   | AAL94334.1  Spermidine/putrescine-binding protein            |                         |    |    |   |   |   |   |
|         |                        |                      |          |          | 18   | 22  | 18.0000    | 28.8597   |                                                              |                         |    |    |   |   |   |   |
| FN0129  |                        |                      |          |          |      | 3   |            | 3.6441    | AAL94335.1  Urease accessory protein ureG                    |                         |    |    |   |   |   |   |
|         |                        |                      |          |          |      |     |            |           |                                                              |                         |    |    |   |   |   |   |

- Show detected proteins only
- Show all proteins

Filter by category:

GO: amino acid transport

Proteins found:  
1338

Enter (or paste) list of ORFs

Find ORFs

Test

Cutoff

q-Value

p-Value

.005

| Signif | Direction | Applies To   |
|--------|-----------|--------------|
| yes    | +         | ratios, bars |
| no     | n/a       | bars         |
| yes    | -         | ratios, bars |
| yes    | +         | p-, q-Values |
| yes    | -         | p-, q-Values |

Dot Plots

Dot Plots

Fn Summary Table

FnPg vs Fn

FnSg vs Fn

FnPgSg vs Fn

FnPgSg vs FnPg

FnSg vs FnPg

FnPgSg vs FnSg

Fn Coverage

| Protein | FnPg vs Fn             |                      |          |          | Raw  |     | Normalized |           | Description                                                 | Log <sub>2</sub> Ratios |    |    |   |   |   |   |
|---------|------------------------|----------------------|----------|----------|------|-----|------------|-----------|-------------------------------------------------------------|-------------------------|----|----|---|---|---|---|
|         | Log <sub>2</sub> Ratio | Log <sub>2</sub> Sum | q-Value  | p-Value  | FnPg | Fn  | FnPg       | Fn        |                                                             | -6                      | -4 | -2 | 0 | 2 | 4 | 6 |
| FN0130  | -1.187                 | 7.187                |          |          |      | 15  |            | 18.2206   | AAL94336.1  ABC transporter ATP-binding protein             |                         |    |    |   |   |   |   |
|         |                        |                      |          |          | 8    |     | 8.0000     |           |                                                             |                         |    |    |   |   |   |   |
| FN0132  | -0.378                 | 5.575                |          |          | 3    |     | 4.1104     |           | AAL93916.1  Hemolysin                                       |                         |    |    |   |   |   |   |
|         |                        |                      |          |          | 8    | 6   | 8.0000     | 7.8708    |                                                             |                         |    |    |   |   |   |   |
| FN0147  | -0.966                 | 10.162               | 1.213e-2 | 1.427e-2 | 12   | 39  | 16.4417    | 47.3735   | AAL94353.1  PLSX protein                                    |                         |    |    |   |   |   |   |
|         |                        |                      |          |          | 32   | 36  | 32.0000    | 47.2250   |                                                             |                         |    |    |   |   |   |   |
| FN0148  | -0.177                 | 16.026               | 5.895e-2 | 1.129e-1 | 159  | 234 | 217.8522   | 284.2413  | AAL94354.1  3-oxoacyl-[acyl-carrier-protein] synthase III   |                         |    |    |   |   |   |   |
|         |                        |                      |          |          | 268  | 202 | 268.0000   | 264.9847  |                                                             |                         |    |    |   |   |   |   |
| FN0149  | -0.210                 | 15.914               | 1.751e-1 | 4.672e-1 | 219  | 252 | 300.0606   | 306.1060  | AAL94355.1  Malonyl-CoA-[acyl-carrier-protein] transacylase |                         |    |    |   |   |   |   |
|         |                        |                      |          |          | 162  | 174 | 162.0000   | 228.2541  |                                                             |                         |    |    |   |   |   |   |
| FN0150  | -0.746                 | 11.656               | 8.561e-4 | 3.661e-4 | 29   | 65  | 39.7341    | 78.9559   | AAL94356.1  Acyl carrier protein                            |                         |    |    |   |   |   |   |
|         |                        |                      |          |          | 48   | 52  | 48.0000    | 68.2139   |                                                             |                         |    |    |   |   |   |   |
| FN0151  | -0.793                 | 19.262               | 5.296e-2 | 9.695e-2 | 205  | 825 | 280.8787   | 1002.1326 | AAL94357.1  3-oxoacyl-[acyl-carrier-protein] synthase       |                         |    |    |   |   |   |   |
|         |                        |                      |          |          | 924  | 827 | 924.0000   | 1084.8630 |                                                             |                         |    |    |   |   |   |   |
| FN0152  | 0.663                  | 5.337                |          |          |      | 4   |            | 4.8588    | AAL94358.1  Ribonuclease III                                |                         |    |    |   |   |   |   |
|         |                        |                      |          |          | 8    | 4   | 8.0000     | 5.2472    |                                                             |                         |    |    |   |   |   |   |
| FN0154  |                        |                      |          |          |      | 7   |            | 8.5029    | AAL94360.1  Ribonuclease G                                  |                         |    |    |   |   |   |   |
|         |                        |                      |          |          |      |     |            |           |                                                             |                         |    |    |   |   |   |   |
| FN0155  |                        |                      |          |          |      | 9   |            | 10.9324   | AAL94361.1  Hypothetical protein                            |                         |    |    |   |   |   |   |
|         |                        |                      |          |          |      |     |            |           |                                                             |                         |    |    |   |   |   |   |
| FN0156  | -0.497                 | 7.347                | 1.051e-1 | 2.418e-1 | 4    | 12  | 5.4806     | 14.5765   | AAL94362.1  Phosphopantetheine adenylyltransferase          |                         |    |    |   |   |   |   |
|         |                        |                      |          |          | 16   | 12  | 16.0000    | 15.7417   |                                                             |                         |    |    |   |   |   |   |
| FN0157  |                        |                      |          |          |      | 7   |            | 8.5029    | AAL94363.1  DNA repair protein Rada                         |                         |    |    |   |   |   |   |
|         |                        |                      |          |          |      | 6   |            | 7.8708    |                                                             |                         |    |    |   |   |   |   |
| FN0158  | -0.530                 | 9.206                | 3.161e-2 | 4.837e-2 | 12   | 20  | 16.4417    | 24.2941   | AAL94364.1  DNA-binding protein                             |                         |    |    |   |   |   |   |
|         |                        |                      |          |          | 24   | 26  | 24.0000    | 34.1069   |                                                             |                         |    |    |   |   |   |   |
| FN0164  | -0.769                 | 15.858               | 1.169e-3 | 6.076e-4 | 155  | 243 | 212.3717   | 295.1736  | AAL94370.1  Anhydro-N-acetylmuramyl-tripeptide amidase      |                         |    |    |   |   |   |   |
|         |                        |                      |          |          | 161  | 260 | 161.0000   | 341.0694  |                                                             |                         |    |    |   |   |   |   |
| FN0170  | 0.112                  | 13.730               | 2.35e-1  | 6.85e-1  | 63   | 95  | 86.3188    | 115.3971  | AAL94376.1  GTP-binding protein                             |                         |    |    |   |   |   |   |
|         |                        |                      |          |          | 156  | 83  | 156.0000   | 108.8798  |                                                             |                         |    |    |   |   |   |   |
| FN0173  | -0.778                 | 10.805               | 8.21e-2  | 1.76e-1  | 7    | 48  | 9.5910     | 58.3059   | AAL94379.1  Hypothetical protein                            |                         |    |    |   |   |   |   |
|         |                        |                      |          |          | 55   | 40  | 55.0000    | 52.4722   |                                                             |                         |    |    |   |   |   |   |

- Show detected proteins only
- Show all proteins

Filter by category:  
GO: amino acid transport

Proteins found:  
1338

Enter (or paste) list of ORFs

Find ORFs

Test

Cutoff

q-Value

p-Value

.005

| Signif | Direction | Applies To   |
|--------|-----------|--------------|
| yes    | +         | ratios, bars |
| no     | n/a       | bars         |
| yes    | -         | ratios, bars |
| yes    | +         | p-, q-Values |
| yes    | -         | p-, q-Values |

Dot Plots Dot Plots

Fn Summary Table FnPg vs Fn FnSg vs Fn FnPgSg vs Fn FnPgSg vs FnPg FnSg vs FnPg FnPgSg vs FnSg Fn Coverage

| Protein | FnPg vs Fn             |                      |          |          | Raw  |     | Normalized |          | Description                                        | Log <sub>2</sub> Ratios |    |    |   |   |   |   |
|---------|------------------------|----------------------|----------|----------|------|-----|------------|----------|----------------------------------------------------|-------------------------|----|----|---|---|---|---|
|         | Log <sub>2</sub> Ratio | Log <sub>2</sub> Sum | q-Value  | p-Value  | FnPg | Fn  | FnPg       | Fn       |                                                    | -6                      | -4 | -2 | 0 | 2 | 4 | 6 |
| FN0174  | -0.124                 | 12.708               | 7.411e-2 | 1.536e-1 | 56   | 65  | 76.7278    | 78.9559  | AAL94380.1  Enoyl-[acyl-carrier-protein] reductase |                         |    |    |   |   |   |   |
|         |                        |                      |          |          | 80   | 70  | 80.0000    | 91.8264  |                                                    |                         |    |    |   |   |   |   |
| FN0175  | -0.146                 | 8.119                | 1.763e-1 | 4.719e-1 | 10   | 17  | 13.7014    | 20.6500  | AAL94381.1  Cell division inhibitor MinC           |                         |    |    |   |   |   |   |
|         |                        |                      |          |          | 18   | 11  | 18.0000    | 14.4299  |                                                    |                         |    |    |   |   |   |   |
| FN0176  | 0.146                  | 15.160               | 7.733e-2 | 1.624e-1 | 134  | 158 | 183.5987   | 191.9236 | AAL94382.1  Cell division inhibitor MinD           |                         |    |    |   |   |   |   |
|         |                        |                      |          |          | 219  | 131 | 219.0000   | 171.8465 |                                                    |                         |    |    |   |   |   |   |
| FN0177  | -1.762                 | 5.841                |          |          | 3    | 10  | 4.1104     | 12.1471  | AAL94383.1  Cell division inhibitor MinE           |                         |    |    |   |   |   |   |
|         |                        |                      |          |          |      | 12  |            | 15.7417  |                                                    |                         |    |    |   |   |   |   |
| FN0178  | -1.229                 | 11.977               | 5.813e-4 | 1.931e-4 | 35   | 78  | 47.9549    | 94.7471  | AAL94384.1  UNC-44 ankyrins                        |                         |    |    |   |   |   |   |
|         |                        |                      |          |          | 35   | 76  | 35.0000    | 99.6972  |                                                    |                         |    |    |   |   |   |   |
| FN0179  | 1.260                  | 11.281               | 9.709e-2 | 2.186e-1 | 93   | 25  | 127.4230   | 30.3677  | AAL94385.1  Ankyrin repeat proteins                |                         |    |    |   |   |   |   |
|         |                        |                      |          |          | 27   | 26  | 27.0000    | 34.1069  |                                                    |                         |    |    |   |   |   |   |
| FN0181  | 0.337                  | 9.382                | 1.942e-1 | 5.371e-1 | 11   | 13  | 15.0715    | 15.7912  | AAL94387.1  Hypothetical protein                   |                         |    |    |   |   |   |   |
|         |                        |                      |          |          | 43   | 23  | 43.0000    | 30.1715  |                                                    |                         |    |    |   |   |   |   |
| FN0182  | 1.741                  | 13.880               | 9.767e-2 | 2.203e-1 | 35   | 49  | 47.9549    | 59.5206  | AAL94388.1  Sarcosine oxidase alpha subunit        |                         |    |    |   |   |   |   |
|         |                        |                      |          |          | 401  | 57  | 401.0000   | 74.7729  |                                                    |                         |    |    |   |   |   |   |
| FN0183  | 0.669                  | 14.512               | 1.728e-1 | 4.589e-1 | 34   | 97  | 46.5848    | 117.8265 | AAL94389.1  Glycerol-3-phosphate dehydrogenase     |                         |    |    |   |   |   |   |
|         |                        |                      |          |          | 339  | 95  | 339.0000   | 124.6215 |                                                    |                         |    |    |   |   |   |   |
| FN0185  | -0.190                 | 8.139                | 2.186e-1 | 6.238e-1 | 12   | 9   | 16.4417    | 10.9324  | AAL94391.1  Hypothetical protein                   |                         |    |    |   |   |   |   |
|         |                        |                      |          |          | 15   | 19  | 15.0000    | 24.9243  |                                                    |                         |    |    |   |   |   |   |
| FN0188  |                        |                      |          |          |      | 13  |            | 15.7912  | AAL94394.1  Peptide methionine sulfoxide reductase |                         |    |    |   |   |   |   |
|         |                        |                      |          |          |      |     |            |          |                                                    |                         |    |    |   |   |   |   |
| FN0189  |                        |                      |          |          |      |     |            |          | AAL94395.1  Two-component response regulator yesN  |                         |    |    |   |   |   |   |
|         |                        |                      |          |          | 20   |     | 20.0000    |          |                                                    |                         |    |    |   |   |   |   |
| FN0190  | -0.711                 | 5.687                |          |          | 6    |     | 8.2208     |          | AAL94396.1  Two-component sensor kinase yesM       |                         |    |    |   |   |   |   |
|         |                        |                      |          |          | 3    | 7   | 3.0000     | 9.1826   |                                                    |                         |    |    |   |   |   |   |
| FN0191  | 0.135                  | 9.220                | 2.069e-1 | 5.817e-1 | 14   | 20  | 19.1820    | 24.2941  | AAL94397.1  helix-turn-helix DNA-binding protein   |                         |    |    |   |   |   |   |
|         |                        |                      |          |          | 32   | 17  | 32.0000    | 22.3007  |                                                    |                         |    |    |   |   |   |   |
| FN0192  | -2.863                 | 10.863               |          |          |      | 88  |            | 106.8941 | AAL94398.1  Dipeptide-binding protein              |                         |    |    |   |   |   |   |
|         |                        |                      |          |          | 16   | 96  | 16.0000    | 125.9333 |                                                    |                         |    |    |   |   |   |   |
| FN0197  |                        |                      |          |          |      |     |            |          | AAL94403.1  Methyltransferase                      |                         |    |    |   |   |   |   |
|         |                        |                      |          |          |      | 4   |            | 5.2472   |                                                    |                         |    |    |   |   |   |   |

Show detected proteins only  
 Show all proteins  
 Filter by category:

Proteins found: 1338

Test Cutoff

| Signif | Direction | Applies To   |
|--------|-----------|--------------|
| yes    | +         | ratios, bars |
| no     | n/a       | bars         |
| yes    | -         | ratios, bars |
| yes    | +         | p-, q-Values |
| yes    | -         |              |

Fn Summary Table

FnPg vs Fn

FnSg vs Fn

FnPgSg vs Fn

FnPgSg vs FnPg

FnSg vs FnPg

FnPgSg vs FnSg

Fn Coverage

| Protein | FnPg vs Fn             |                      |          |          | Raw  |      | Normalized |           | Description                                                                 | Log <sub>2</sub> Ratios |    |    |   |   |   |   |
|---------|------------------------|----------------------|----------|----------|------|------|------------|-----------|-----------------------------------------------------------------------------|-------------------------|----|----|---|---|---|---|
|         | Log <sub>2</sub> Ratio | Log <sub>2</sub> Sum | q-Value  | p-Value  | FnPg | Fn   | FnPg       | Fn        |                                                                             | -6                      | -4 | -2 | 0 | 2 | 4 | 6 |
| FN0198  |                        |                      |          |          |      | 6    |            | 7.2882    | AAL94404.1  Transcriptional regulatory protein                              |                         |    |    |   |   |   |   |
|         |                        |                      |          |          |      | 4    |            | 5.2472    |                                                                             |                         |    |    |   |   |   |   |
| FN0199  | 0.589                  | 11.112               | 1.742e-3 | 1.054e-3 | 39   | 34   | 53.4355    | 41.3000   | AAL94405.1  Hypothetical protein                                            |                         |    |    |   |   |   |   |
|         |                        |                      |          |          | 62   | 27   | 62.0000    | 35.4187   |                                                                             |                         |    |    |   |   |   |   |
| FN0200  | -1.336                 | 20.587               | 1.877e-2 | 2.497e-2 | 942  | 1665 | 1290.6717  | 2022.4859 | AAL94406.1  Biotin carboxyl carrier protein of glutaconyl-CoA decarboxylase |                         |    |    |   |   |   |   |
|         |                        |                      |          |          | 289  | 1499 | 289.0000   | 1966.3961 |                                                                             |                         |    |    |   |   |   |   |
| FN0202  | -0.590                 | 19.813               | 2.697e-3 | 1.932e-3 | 585  | 1032 | 801.5318   | 1253.5768 | AAL94408.1  Glutaconate CoA-transferase subunit A                           |                         |    |    |   |   |   |   |
|         |                        |                      |          |          | 763  | 840  | 763.0000   | 1101.9164 |                                                                             |                         |    |    |   |   |   |   |
| FN0203  | 0.084                  | 21.144               | 2.282e-1 | 6.59e-1  | 1361 | 1114 | 1864.7603  | 1353.1827 | AAL94409.1  Glutaconate CoA-transferase subunit B                           |                         |    |    |   |   |   |   |
|         |                        |                      |          |          | 1270 | 1223 | 1270.0000  | 1604.3379 |                                                                             |                         |    |    |   |   |   |   |
| FN0204  | -0.493                 | 21.327               | 1.772e-2 | 2.309e-2 | 833  | 1600 | 1141.3265  | 1943.5299 | AAL94410.1  Glutaconyl-CoA decarboxylase A subunit                          |                         |    |    |   |   |   |   |
|         |                        |                      |          |          | 1593 | 1452 | 1593.0000  | 1904.7413 |                                                                             |                         |    |    |   |   |   |   |
| FN0206  | -0.444                 | 12.567               | 1.01e-1  | 2.3e-1   | 69   | 74   | 94.5396    | 89.8883   | AAL94412.1  Activator of (R)-2-hydroxyglutaryl-CoA dehydratase              |                         |    |    |   |   |   |   |
|         |                        |                      |          |          | 39   | 70   | 39.0000    | 91.8264   |                                                                             |                         |    |    |   |   |   |   |
| FN0207  | -0.327                 | 19.040               | 1.127e-1 | 2.635e-1 | 632  | 681  | 865.9284   | 827.2149  | AAL94413.1  (R)-2-hydroxyglutaryl-CoA dehydratase alpha-subunit             |                         |    |    |   |   |   |   |
|         |                        |                      |          |          | 445  | 623  | 445.0000   | 817.2547  |                                                                             |                         |    |    |   |   |   |   |
| FN0208  | -0.455                 | 17.834               | 2.923e-3 | 2.161e-3 | 280  | 461  | 383.6392   | 559.9796  | AAL94414.1  (R)-2-hydroxyglutaryl-CoA dehydratase beta-subunit              |                         |    |    |   |   |   |   |
|         |                        |                      |          |          | 442  | 436  | 442.0000   | 571.9471  |                                                                             |                         |    |    |   |   |   |   |
| FN0209  | -0.386                 | 17.986               | 7.596e-4 | 2.975e-4 | 339  | 486  | 464.4774   | 590.3472  | AAL94415.1  Hypothetical cytosolic protein                                  |                         |    |    |   |   |   |   |
|         |                        |                      |          |          | 427  | 438  | 427.0000   | 574.5707  |                                                                             |                         |    |    |   |   |   |   |
| FN0212  | -0.009                 | 9.149                | 3.045e-1 | 9.76e-1  | 23   | 21   | 31.5132    | 25.5088   | AAL94418.1  Hypothetical protein                                            |                         |    |    |   |   |   |   |
|         |                        |                      |          |          | 16   | 17   | 16.0000    | 22.3007   |                                                                             |                         |    |    |   |   |   |   |
| FN0214  |                        |                      |          |          | 3    |      | 4.1104     |           | AAL94420.1  Crossover junction endodeoxyribonuclease ruvC                   |                         |    |    |   |   |   |   |
|         |                        |                      |          |          |      |      |            |           |                                                                             |                         |    |    |   |   |   |   |
| FN0218  | 0.516                  | 14.609               | 6.593e-2 | 1.321e-1 | 173  | 114  | 237.0342   | 138.4765  | AAL94424.1  Anthranilate synthase component II                              |                         |    |    |   |   |   |   |
|         |                        |                      |          |          | 141  | 96   | 141.0000   | 125.9333  |                                                                             |                         |    |    |   |   |   |   |
| FN0219  | 0.304                  | 4.866                |          |          |      | 4    |            | 4.8588    | AAL94425.1  Autolysin response regulator                                    |                         |    |    |   |   |   |   |
|         |                        |                      |          |          | 6    |      | 6.0000     |           |                                                                             |                         |    |    |   |   |   |   |
| FN0221  | 0.220                  | 11.462               | 3.049e-2 | 4.613e-2 | 45   | 40   | 61.6563    | 48.5882   | AAL94427.1  Carbon starvation protein A                                     |                         |    |    |   |   |   |   |
|         |                        |                      |          |          | 53   | 38   | 53.0000    | 49.8486   |                                                                             |                         |    |    |   |   |   |   |
| FN0224  | -0.910                 | 8.992                | 1.518e-2 | 1.886e-2 | 16   | 25   | 21.9222    | 30.3677   | AAL94430.1  Excinuclease ABC subunit B                                      |                         |    |    |   |   |   |   |
|         |                        |                      |          |          | 11   | 24   | 11.0000    | 31.4833   |                                                                             |                         |    |    |   |   |   |   |

- Show detected proteins only
- Show all proteins

Filter by category:  
GO: amino acid transport

Proteins found:  
1338

Enter (or paste) list of ORFs

Find ORFs

Test

Cutoff

q-Value

p-Value

.005

| Signif | Direction | Applies To   |
|--------|-----------|--------------|
| yes    | +         | ratios, bars |
| no     | n/a       | bars         |
| yes    | -         | ratios, bars |
| yes    | +         | p-, q-Values |
| yes    | -         | p-, q-Values |

Dot Plots Dot Plots



Fn Summary Table FnPg vs Fn FnSg vs Fn FnPgSg vs Fn FnPgSg vs FnPg FnSg vs FnPg FnPgSg vs FnSg Fn Coverage

| Protein       | FnPg vs Fn             |                      |          |          | Raw  |     | Normalized |          | Description                                               | Log <sub>2</sub> Ratios |    |    |   |   |   |   |
|---------------|------------------------|----------------------|----------|----------|------|-----|------------|----------|-----------------------------------------------------------|-------------------------|----|----|---|---|---|---|
|               | Log <sub>2</sub> Ratio | Log <sub>2</sub> Sum | q-Value  | p-Value  | FnPg | Fn  | FnPg       | Fn       |                                                           | -6                      | -4 | -2 | 0 | 2 | 4 | 6 |
| <b>FN0225</b> |                        |                      |          |          | 4    |     | 4.0000     |          | AAL94431.1  Gluconate permease                            |                         |    |    |   |   |   |   |
| <b>FN0226</b> | -0.258                 | 12.152               | 4.659e-3 | 4.129e-3 | 47   | 61  | 64.3966    | 74.0971  | AAL94432.1  Pyridoxal phosphate biosynthetic protein pdxA |                         |    |    |   |   |   |   |
| <b>FN0227</b> |                        |                      |          |          | 4    |     | 4.0000     |          | AAL94433.1  Hypothetical protein                          |                         |    |    |   |   |   |   |
| <b>FN0233</b> | -0.178                 | 12.478               | 1.701e-1 | 4.491e-1 | 65   | 61  | 89.0591    | 74.0971  | AAL94439.1  Hypothetical protein                          |                         |    |    |   |   |   |   |
| <b>FN0234</b> | -0.582                 | 7.501                |          |          |      | 12  |            | 14.5765  | AAL94440.1  unknown                                       |                         |    |    |   |   |   |   |
| <b>FN0235</b> |                        |                      |          |          | 16   |     | 21.9222    |          | AAL94441.1  ABC transporter ATP-binding protein           |                         |    |    |   |   |   |   |
| <b>FN0236</b> | 0.731                  | 16.378               | 1.67e-1  | 4.38e-1  | 486  | 172 | 665.8880   | 208.9295 | AAL94442.1  ABC transporter substrate-binding protein     |                         |    |    |   |   |   |   |
| <b>FN0237</b> |                        |                      |          |          | 3    |     | 4.1104     |          | AAL94443.1  ABC transporter permease protein              |                         |    |    |   |   |   |   |
| <b>FN0238</b> | -0.136                 | 10.982               | 2.095e-1 | 5.91e-1  | 40   | 42  | 54.8056    | 51.0177  | AAL94444.1  Hypothetical protein                          |                         |    |    |   |   |   |   |
| <b>FN0240</b> | -0.078                 | 13.135               | 1.549e-1 | 3.959e-1 | 64   | 87  | 87.6890    | 105.6794 | AAL94446.1  Thymidylate synthase                          |                         |    |    |   |   |   |   |
| <b>FN0241</b> | 0.165                  | 9.300                | 2.215e-1 | 6.345e-1 | 14   | 25  | 19.1820    | 30.3677  | AAL94447.1  Dihydrofolate reductase                       |                         |    |    |   |   |   |   |
| <b>FN0242</b> | -0.011                 | 12.011               |          |          |      | 50  |            | 60.7353  | AAL94448.1  Trk system potassium uptake protein trkA      |                         |    |    |   |   |   |   |
| <b>FN0243</b> | 0.210                  | 9.190                |          |          |      | 10  |            | 12.1471  | AAL94449.1  Poly(A) polymerase                            |                         |    |    |   |   |   |   |
| <b>FN0244</b> | -1.191                 | 7.835                |          |          |      | 16  |            | 19.4353  | AAL94450.1  COP associated protein                        |                         |    |    |   |   |   |   |
| <b>FN0245</b> | -0.922                 | 6.922                |          |          |      | 12  |            | 14.5765  | AAL94451.1  Copper-exporting ATPase                       |                         |    |    |   |   |   |   |
| <b>FN0247</b> | -1.109                 | 14.471               | 1.669e-2 | 2.132e-2 | 41   | 183 | 56.1757    | 222.2912 | AAL94453.1  Hypothetical cytosolic protein                |                         |    |    |   |   |   |   |

Show detected proteins only  
 Show all proteins  
 Filter by category:

Proteins found: 1338

Enter (or paste) list of ORFs

Find ORFs

Test Cutoff

q-Value

p-Value

.005

| Signif | Direction | Applies To   |
|--------|-----------|--------------|
| yes    | +         | ratios, bars |
| no     | n/a       | bars         |
| yes    | -         | ratios, bars |
| yes    | +         | p-, q-Values |
| yes    | -         | p-, q-Values |

Dot Plots

Fn Summary Table FnPg vs Fn FnSg vs Fn FnPgSg vs Fn FnPgSg vs FnPg FnSg vs FnPg FnPgSg vs FnSg Fn Coverage

| Protein       | FnPg vs Fn             |                      |          |          | Raw  |      | Normalized |           | Description                                                  | Log <sub>2</sub> Ratios |    |    |   |   |   |   |
|---------------|------------------------|----------------------|----------|----------|------|------|------------|-----------|--------------------------------------------------------------|-------------------------|----|----|---|---|---|---|
|               | Log <sub>2</sub> Ratio | Log <sub>2</sub> Sum | q-Value  | p-Value  | FnPg | Fn   | FnPg       | Fn        |                                                              | -6                      | -4 | -2 | 0 | 2 | 4 | 6 |
| <b>FN0248</b> |                        |                      |          |          | 42   |      | 42.0000    |           | AAL94454.1  Hypothetical Exported Protein                    |                         |    |    |   |   |   |   |
| <b>FN0249</b> | -1.626                 | 14.269               | 5.543e-3 | 5.222e-3 | 89   | 210  | 121.9424   | 255.0883  | AAL94455.1  unknown                                          |                         |    |    |   |   |   |   |
| <b>FN0250</b> | -0.589                 | 13.778               | 8.361e-2 | 1.803e-1 | 106  | 113  | 145.2348   | 137.2618  | AAL94456.1  unknown                                          |                         |    |    |   |   |   |   |
| <b>FN0251</b> | -0.361                 | 15.648               | 1.844e-1 | 5.025e-1 | 240  | 195  | 328.8336   | 236.8677  | AAL94457.1  Hypothetical membrane-spanning Protein           |                         |    |    |   |   |   |   |
| <b>FN0252</b> | 1.100                  | 17.889               | 6.173e-2 | 1.209e-1 | 753  | 270  | 1031.7153  | 327.9707  | AAL94458.1  unknown                                          |                         |    |    |   |   |   |   |
| <b>FN0253</b> | -0.332                 | 15.532               |          |          |      | 198  |            | 240.5118  | AAL94459.1  Outer membrane protein                           |                         |    |    |   |   |   |   |
| <b>FN0254</b> | -0.864                 | 19.214               | 3.416e-3 | 2.688e-3 | 352  | 851  | 482.2892   | 1033.7150 | AAL94460.1  Fusobacterium outer membrane protein family      |                         |    |    |   |   |   |   |
| <b>FN0258</b> | -1.074                 | 6.733                | 3.329e-2 | 5.181e-2 | 6    | 16   | 8.2208     | 19.4353   | AAL94464.1  Zinc-transporting ATPase                         |                         |    |    |   |   |   |   |
| <b>FN0260</b> |                        |                      |          |          |      |      |            | 6.5590    | AAL94466.1  Transcriptional repressor smtB                   |                         |    |    |   |   |   |   |
| <b>FN0261</b> | -1.252                 | 9.331                |          |          | 12   | 31   | 16.4417    | 37.6559   | AAL94467.1  Pyruvate formate-lyase activating enzyme         |                         |    |    |   |   |   |   |
| <b>FN0262</b> | -1.824                 | 23.015               | 4.137e-3 | 3.483e-3 | 1745 | 4406 | 2390.8940  | 5351.9956 | AAL94468.1  Formate acetyltransferase                        |                         |    |    |   |   |   |   |
| <b>FN0263</b> | -0.370                 | 16.995               | 1.843e-1 | 5.019e-1 | 386  | 358  | 528.8740   | 434.8648  | AAL94469.1  Peptidyl-prolyl cis-trans isomerase              |                         |    |    |   |   |   |   |
| <b>FN0264</b> | -0.911                 | 16.196               | 1.619e-2 | 2.05e-2  | 96   | 314  | 131.5334   | 381.4178  | AAL94470.1  Hypothetical protein                             |                         |    |    |   |   |   |   |
| <b>FN0265</b> | -1.308                 | 8.227                |          |          |      | 20   |            | 24.2941   | AAL94471.1  Cell division protein ftsX                       |                         |    |    |   |   |   |   |
| <b>FN0266</b> | -1.145                 | 7.145                |          |          |      | 14   |            | 17.0059   | AAL94472.1  membrane protein related to metalloendopeptidase |                         |    |    |   |   |   |   |
| <b>FN0267</b> | -0.759                 | 5.929                |          |          |      | 7    |            | 8.5029    | AAL94473.1  ATP-NAD kinase                                   |                         |    |    |   |   |   |   |

Show detected proteins only  
 Show all proteins  
 Filter by category:

Proteins found: 1338

Enter (or paste) list of ORFs

Find ORFs

Test Cutoff

q-Value .005

p-Value

| Signif | Direction | Applies To   |
|--------|-----------|--------------|
| yes    | +         | ratios, bars |
| no     | n/a       | bars         |
| yes    | -         | ratios, bars |
| yes    | +         | p-, q-Values |
| yes    | -         |              |

Dot Plots Dot Plots

Fn Summary Table

FnPg vs Fn

FnSg vs Fn

FnPgSg vs Fn

FnPgSg vs FnPg

FnSg vs FnPg

FnPgSg vs FnSg

Fn Coverage

| Protein | FnPg vs Fn             |                      |          |          | Raw  |     | Normalized |          | Description                                                          | Log <sub>2</sub> Ratios |    |    |   |   |   |   |
|---------|------------------------|----------------------|----------|----------|------|-----|------------|----------|----------------------------------------------------------------------|-------------------------|----|----|---|---|---|---|
|         | Log <sub>2</sub> Ratio | Log <sub>2</sub> Sum | q-Value  | p-Value  | FnPg | Fn  | FnPg       | Fn       |                                                                      | -6                      | -4 | -2 | 0 | 2 | 4 | 6 |
| FN0268  | -0.137                 | 7.964                |          |          | 11   | 10  | 15.0715    | 12.1471  | AAL94474.1  DNA repair protein recN                                  |                         |    |    |   |   |   |   |
|         |                        |                      |          |          |      |     |            |          |                                                                      |                         |    |    |   |   |   |   |
| FN0270  |                        |                      |          |          |      |     |            |          | AAL94476.1  GTP-binding protein era                                  |                         |    |    |   |   |   |   |
|         |                        |                      |          |          |      |     |            |          |                                                                      |                         |    |    |   |   |   |   |
| FN0271  | 0.783                  | 6.832                |          |          |      |     |            |          | AAL94477.1  Enoyl-CoA hydratase                                      |                         |    |    |   |   |   |   |
|         |                        |                      |          |          | 14   | 5   | 14.0000    | 6.5590   |                                                                      |                         |    |    |   |   |   |   |
| FN0272  | -0.713                 | 4.713                |          |          |      |     |            |          | AAL94478.1  Acetoacetate:<br>butyrate/acetate coenzyme A transferase |                         |    |    |   |   |   |   |
|         |                        |                      |          |          | 4    | 5   | 4.0000     | 6.5590   |                                                                      |                         |    |    |   |   |   |   |
| FN0273  |                        |                      |          |          |      |     |            |          | AAL94479.1  Butyrate-acetoacetate CoA-<br>transferase subunit B      |                         |    |    |   |   |   |   |
|         |                        |                      |          |          | 16   |     | 16.0000    |          |                                                                      |                         |    |    |   |   |   |   |
| FN0276  | 1.319                  | 9.021                |          |          |      |     |            |          | AAL94482.1  Sodium-dependent phosphate<br>transporter                |                         |    |    |   |   |   |   |
|         |                        |                      |          |          | 36   | 11  | 36.0000    | 14.4299  |                                                                      |                         |    |    |   |   |   |   |
| FN0277  | -0.304                 | 7.393                | 7.804e-2 | 1.644e-1 | 9    | 14  | 12.3313    | 17.0059  | AAL94483.1  Hypothetical protein                                     |                         |    |    |   |   |   |   |
|         |                        |                      |          |          | 11   | 9   | 11.0000    | 11.8062  |                                                                      |                         |    |    |   |   |   |   |
| FN0278  | -0.096                 | 16.203               | 9.868e-2 | 2.233e-1 | 209  | 230 | 286.3592   | 279.3824 | AAL94484.1  Xaa-His dipeptidase                                      |                         |    |    |   |   |   |   |
|         |                        |                      |          |          | 245  | 220 | 245.0000   | 288.5972 |                                                                      |                         |    |    |   |   |   |   |
| FN0279  | 0.946                  | 13.128               | 1.364e-1 | 3.36e-1  | 26   | 55  | 35.6236    | 66.8088  | AAL94485.1  Lipoprotein                                              |                         |    |    |   |   |   |   |
|         |                        |                      |          |          | 227  | 53  | 227.0000   | 69.5257  |                                                                      |                         |    |    |   |   |   |   |
| FN0280  | -0.987                 | 13.362               | 4.062e-2 | 6.736e-2 | 21   | 119 | 28.7729    | 144.5500 | AAL94486.1  Hypothetical protein                                     |                         |    |    |   |   |   |   |
|         |                        |                      |          |          | 117  | 110 | 117.0000   | 144.2986 |                                                                      |                         |    |    |   |   |   |   |
| FN0281  | -0.491                 | 11.913               | 9.66e-2  | 2.172e-1 | 21   | 64  | 28.7729    | 77.7412  | AAL94487.1  DNA polymerase III alpha<br>subunit                      |                         |    |    |   |   |   |   |
|         |                        |                      |          |          | 76   | 53  | 76.0000    | 69.5257  |                                                                      |                         |    |    |   |   |   |   |
| FN0282  | -0.017                 | 10.968               | 2.942e-1 | 9.293e-1 | 27   | 32  | 36.9938    | 38.8706  | AAL94488.1  Hypothetical protein                                     |                         |    |    |   |   |   |   |
|         |                        |                      |          |          | 52   | 39  | 52.0000    | 51.1604  |                                                                      |                         |    |    |   |   |   |   |
| FN0283  | -1.392                 | 8.035                |          |          |      |     |            |          | AAL94489.1  tRNA (Guanine-N1) -<br>methyltransferase                 |                         |    |    |   |   |   |   |
|         |                        |                      |          |          | 10   | 20  | 10.0000    | 26.2361  |                                                                      |                         |    |    |   |   |   |   |
| FN0284  | 1.792                  | 9.609                |          |          |      |     |            |          | AAL94490.1  16S rRNA processing protein<br>rimM                      |                         |    |    |   |   |   |   |
|         |                        |                      |          |          | 52   | 9   | 52.0000    | 11.8062  |                                                                      |                         |    |    |   |   |   |   |
| FN0285  | 2.474                  | 7.035                |          |          |      |     |            |          | AAL94491.1  RNA binding protein                                      |                         |    |    |   |   |   |   |
|         |                        |                      |          |          | 27   |     | 27.0000    |          |                                                                      |                         |    |    |   |   |   |   |
| FN0287  | 0.047                  | 7.354                |          |          |      |     |            |          | AAL94493.1  Dimethyladenosine<br>transferase                         |                         |    |    |   |   |   |   |
|         |                        |                      |          |          | 13   | 9   | 13.0000    | 11.8062  |                                                                      |                         |    |    |   |   |   |   |

 Show detected proteins only  
 Show all proteins

 Filter by category:

 Proteins found:  
 1338

 Enter (or  
 paste) list  
 of ORFs

Test

Cutoff




|                                           | Signif | Direction | Applies To   |
|-------------------------------------------|--------|-----------|--------------|
| <span style="color: red;">■</span>        | yes    | +         | ratios, bars |
| <span style="color: yellow;">■</span>     | no     | n/a       | bars         |
| <span style="color: green;">■</span>      | yes    | -         | ratios, bars |
| <span style="color: pink;">■</span>       | yes    | +         | p-, q-Values |
| <span style="color: lightgreen;">■</span> | yes    | -         | p-, q-Values |

Fn Summary Table FnPg vs Fn FnSg vs Fn FnPgSg vs Fn FnPgSg vs FnPg FnSg vs FnPg FnPgSg vs FnSg Fn Coverage

| Protein | FnPg vs Fn             |                      |          |          | Raw  |     | Normalized |          | Description                                                            | Log <sub>2</sub> Ratios |    |    |   |   |   |   |
|---------|------------------------|----------------------|----------|----------|------|-----|------------|----------|------------------------------------------------------------------------|-------------------------|----|----|---|---|---|---|
|         | Log <sub>2</sub> Ratio | Log <sub>2</sub> Sum | q-Value  | p-Value  | FnPg | Fn  | FnPg       | Fn       |                                                                        | -6                      | -4 | -2 | 0 | 2 | 4 | 6 |
| FN0288  | 0.806                  | 10.873               | 8.985e-2 | 1.977e-1 | 23   | 28  | 31.5132    | 34.0118  | AAL94494.1  Hypoxanthine-guanine phosphoribosyltransferase             |                         |    |    |   |   |   |   |
|         |                        |                      |          |          | 83   | 24  | 83.0000    | 31.4833  |                                                                        |                         |    |    |   |   |   |   |
| FN0291  | 1.345                  | 5.298                |          |          |      |     |            |          | AAL94497.1  Hemolysin                                                  |                         |    |    |   |   |   |   |
|         |                        |                      |          |          | 10   | 3   | 10.0000    | 3.9354   |                                                                        |                         |    |    |   |   |   |   |
| FN0294  | -0.806                 | 15.296               | 8.268e-3 | 9.034e-3 | 136  | 212 | 186.3390   | 257.5177 | AAL94500.1  Transketolase subunit A                                    |                         |    |    |   |   |   |   |
|         |                        |                      |          |          | 117  | 208 | 117.0000   | 272.8555 |                                                                        |                         |    |    |   |   |   |   |
| FN0295  | 0.025                  | 14.942               | 2.939e-1 | 9.281e-1 | 170  | 146 | 232.9238   | 177.3471 | AAL94501.1  Transketolase                                              |                         |    |    |   |   |   |   |
|         |                        |                      |          |          | 125  | 133 | 125.0000   | 174.4701 |                                                                        |                         |    |    |   |   |   |   |
| FN0296  | 0.286                  | 11.332               | 1.34e-1  | 3.283e-1 | 30   | 39  | 41.1042    | 47.3735  | AAL94502.1  Hypothetical cytosolic protein                             |                         |    |    |   |   |   |   |
|         |                        |                      |          |          | 71   | 34  | 71.0000    | 44.6014  |                                                                        |                         |    |    |   |   |   |   |
| FN0297  | 0.274                  | 7.325                | 2.215e-1 | 6.344e-1 | 5    | 6   | 6.8507     | 7.2882   | AAL94503.1  ATPase associated with chromosome architecture/replication |                         |    |    |   |   |   |   |
|         |                        |                      |          |          | 21   | 12  | 21.0000    | 15.7417  |                                                                        |                         |    |    |   |   |   |   |
| FN0298  | 0.398                  | 15.651               | 1.757e-1 | 4.697e-1 | 94   | 173 | 128.7931   | 210.1442 | AAL94504.1  Histidyl-tRNA synthetase                                   |                         |    |    |   |   |   |   |
|         |                        |                      |          |          | 392  | 141 | 392.0000   | 184.9645 |                                                                        |                         |    |    |   |   |   |   |
| FN0299  | -0.529                 | 15.954               | 6.556e-2 | 1.311e-1 | 96   | 239 | 131.5334   | 290.3148 | AAL94505.1  Aspartyl-tRNA synthetase                                   |                         |    |    |   |   |   |   |
|         |                        |                      |          |          | 288  | 240 | 288.0000   | 314.8333 |                                                                        |                         |    |    |   |   |   |   |
| FN0305  |                        |                      |          |          |      |     |            |          | AAL94511.1  Iron(III) dicitrate-binding protein                        |                         |    |    |   |   |   |   |
|         |                        |                      |          |          |      | 3   |            | 3.9354   |                                                                        |                         |    |    |   |   |   |   |
| FN0308  | -0.517                 | 16.825               | 1.128e-3 | 5.716e-4 | 191  | 347 | 261.6967   | 421.5031 | AAL94514.1  Iron(III)-binding protein                                  |                         |    |    |   |   |   |   |
|         |                        |                      |          |          | 308  | 300 | 308.0000   | 393.5416 |                                                                        |                         |    |    |   |   |   |   |
| FN0309  |                        |                      |          |          |      |     |            |          | AAL94515.1  Iron(III)-transport system permease protein sfuB           |                         |    |    |   |   |   |   |
|         |                        |                      |          |          |      | 8   |            | 10.4944  |                                                                        |                         |    |    |   |   |   |   |
| FN0310  | -0.888                 | 13.719               | 1.399e-2 | 1.701e-2 | 83   | 123 | 113.7216   | 149.4089 | AAL94516.1  Iron(III)-transport ATP-binding protein sfuC               |                         |    |    |   |   |   |   |
|         |                        |                      |          |          | 57   | 127 | 57.0000    | 166.5993 |                                                                        |                         |    |    |   |   |   |   |
| FN0311  | -0.932                 | 13.015               | 1.996e-2 | 2.706e-2 | 29   | 100 | 39.7341    | 121.4706 | AAL94517.1  Anaerobic ribonucleoside-triphosphate reductase            |                         |    |    |   |   |   |   |
|         |                        |                      |          |          | 92   | 99  | 92.0000    | 129.8687 |                                                                        |                         |    |    |   |   |   |   |
| FN0313  | -0.943                 | 8.558                |          |          |      | 13  |            | 15.7912  | AAL94519.1  16S rRNA m(5)C 967 methyltransferase                       |                         |    |    |   |   |   |   |
|         |                        |                      |          |          | 14   | 29  | 14.0000    | 38.0424  |                                                                        |                         |    |    |   |   |   |   |
| FN0314  |                        |                      |          |          |      |     |            |          | AAL94520.1  Caffeoyl-CoA O-methyltransferase                           |                         |    |    |   |   |   |   |
|         |                        |                      |          |          | 8    |     | 8.0000     |          |                                                                        |                         |    |    |   |   |   |   |
| FN0315  |                        |                      |          |          |      |     |            |          | AAL94521.1  Transcriptional regulator, AraC family                     |                         |    |    |   |   |   |   |
|         |                        |                      |          |          | 10   |     | 10.0000    |          |                                                                        |                         |    |    |   |   |   |   |

Show detected proteins only  
 Show all proteins  
 Filter by category:

Proteins found: 1338

Enter (or paste) list of ORFs

Test Cutoff

| Signif | Direction | Applies To   |
|--------|-----------|--------------|
| yes    | +         | ratios, bars |
| no     | n/a       | bars         |
| yes    | -         | ratios, bars |
| yes    | +         | p-, q-Values |
| yes    | -         |              |

Fn Summary Table

FnPg vs Fn

FnSg vs Fn

FnPgSg vs Fn

FnPgSg vs FnPg

FnSg vs FnPg

FnPgSg vs FnSg

Fn Coverage

| Protein | FnPg vs Fn             |                      |          |          | Raw  |      | Normalized |           | Description                                                          | Log <sub>2</sub> Ratios |    |    |   |   |   |   |
|---------|------------------------|----------------------|----------|----------|------|------|------------|-----------|----------------------------------------------------------------------|-------------------------|----|----|---|---|---|---|
|         | Log <sub>2</sub> Ratio | Log <sub>2</sub> Sum | q-Value  | p-Value  | FnPg | Fn   | FnPg       | Fn        |                                                                      | -6                      | -4 | -2 | 0 | 2 | 4 | 6 |
| FN0316  | -0.584                 | 9.667                |          |          | 17   | 24   | 23.2924    | 29.1529   | AAL94522.1  Hypothetical protein                                     |                         |    |    |   |   |   |   |
|         |                        |                      |          |          |      | 31   |            | 40.6660   |                                                                      |                         |    |    |   |   |   |   |
| FN0317  | 0.441                  | 8.024                | 1.622e-1 | 4.21e-1  | 7    | 12   | 9.5910     | 14.5765   | AAL94523.1  Tryptophan synthase beta chain                           |                         |    |    |   |   |   |   |
|         |                        |                      |          |          | 28   | 10   | 28.0000    | 13.1181   |                                                                      |                         |    |    |   |   |   |   |
| FN0319  | -0.418                 | 6.033                |          |          |      | 10   |            | 12.1471   | AAL94525.1  Citrate (pro-3S)-lyase ligase                            |                         |    |    |   |   |   |   |
|         |                        |                      |          |          | 7    | 5    | 7.0000     | 6.5590    |                                                                      |                         |    |    |   |   |   |   |
| FN0320  | -0.089                 | 9.430                | 1.812e-1 | 4.901e-1 | 16   | 23   | 21.9222    | 27.9382   | AAL94526.1  Hypothetical cytosolic protein                           |                         |    |    |   |   |   |   |
|         |                        |                      |          |          | 29   | 20   | 29.0000    | 26.2361   |                                                                      |                         |    |    |   |   |   |   |
| FN0321  | 0.268                  | 13.895               | 1.544e-1 | 3.944e-1 | 70   | 101  | 95.9098    | 122.6853  | AAL94527.1  Heat shock protein htpG                                  |                         |    |    |   |   |   |   |
|         |                        |                      |          |          | 175  | 78   | 175.0000   | 102.3208  |                                                                      |                         |    |    |   |   |   |   |
| FN0322  | 0.176                  | 21.395               | 1.898e-1 | 5.221e-1 | 934  | 1315 | 1279.7106  | 1597.3387 | AAL94528.1  Fructose-bisphosphate aldolase                           |                         |    |    |   |   |   |   |
|         |                        |                      |          |          | 2250 | 1164 | 2250.0000  | 1526.9413 |                                                                      |                         |    |    |   |   |   |   |
| FN0325  | -4.103                 | 8.182                |          |          | 3    | 58   | 4.1104     | 70.4530   | AAL94529.1  LSU ribosomal protein L20P                               |                         |    |    |   |   |   |   |
|         |                        |                      |          |          |      | 54   |            | 70.8375   |                                                                      |                         |    |    |   |   |   |   |
| FN0326  |                        |                      |          |          |      | 7    |            | 8.5029    | AAL94530.1  LSU ribosomal protein L35P                               |                         |    |    |   |   |   |   |
|         |                        |                      |          |          |      |      |            |           |                                                                      |                         |    |    |   |   |   |   |
| FN0327  | -2.002                 | 11.049               |          |          |      | 75   |            | 91.1030   | AAL94531.1  Bacterial Protein Translation Initiation Factor 3 (IF-3) |                         |    |    |   |   |   |   |
|         |                        |                      |          |          | 23   | 71   | 23.0000    | 93.1382   |                                                                      |                         |    |    |   |   |   |   |
| FN0329  | -0.359                 | 18.255               | 9.469e-2 | 2.116e-1 | 472  | 528  | 646.7060   | 641.3649  | AAL94533.1  LSU ribosomal protein L13P                               |                         |    |    |   |   |   |   |
|         |                        |                      |          |          | 341  | 477  | 341.0000   | 625.7311  |                                                                      |                         |    |    |   |   |   |   |
| FN0330  | -1.152                 | 12.311               | 2.453e-3 | 1.701e-3 | 45   | 81   | 61.6563    | 98.3912   | AAL94534.1  SSU ribosomal protein S9P                                |                         |    |    |   |   |   |   |
|         |                        |                      |          |          | 34   | 87   | 34.0000    | 114.1271  |                                                                      |                         |    |    |   |   |   |   |
| FN0331  | -1.077                 | 11.208               | 3.941e-2 | 6.465e-2 | 8    | 58   | 10.9611    | 70.4530   | AAL94535.1  Hypothetical protein                                     |                         |    |    |   |   |   |   |
|         |                        |                      |          |          | 56   | 54   | 56.0000    | 70.8375   |                                                                      |                         |    |    |   |   |   |   |
| FN0332  |                        |                      |          |          |      |      |            |           | AAL94536.1  Magnesium and cobalt transport protein corA              |                         |    |    |   |   |   |   |
|         |                        |                      |          |          | 7    |      | 7.0000     |           |                                                                      |                         |    |    |   |   |   |   |
| FN0333  |                        |                      |          |          |      |      |            |           | AAL94537.1  Glycerol uptake operon antiterminator regulatory protein |                         |    |    |   |   |   |   |
|         |                        |                      |          |          | 8    |      | 8.0000     |           |                                                                      |                         |    |    |   |   |   |   |
| FN0334  | -0.173                 | 14.224               | 1.787e-1 | 4.807e-1 | 69   | 123  | 94.5396    | 149.4089  | AAL94538.1  Aspartate/aromatic aminotransferase                      |                         |    |    |   |   |   |   |
|         |                        |                      |          |          | 166  | 110  | 166.0000   | 144.2986  |                                                                      |                         |    |    |   |   |   |   |
| FN0335  | -0.593                 | 20.284               | 5.665e-2 | 1.066e-1 | 932  | 1093 | 1276.9703  | 1327.6739 | AAL94539.1  Outer membrane porin F                                   |                         |    |    |   |   |   |   |
|         |                        |                      |          |          | 563  | 1103 | 563.0000   | 1446.9212 |                                                                      |                         |    |    |   |   |   |   |

Show detected proteins only  
 Show all proteins  
 Filter by category:

Proteins found: 1338

Enter (or paste) list of ORFs

Test Cutoff

| Signif | Direction | Applies To   |
|--------|-----------|--------------|
| yes    | +         | ratios, bars |
| no     | n/a       | bars         |
| yes    | -         | ratios, bars |
| yes    | +         | p-, q-Values |
| yes    | -         |              |

Fn Summary Table

FnPg vs Fn

FnSg vs Fn

FnPgSg vs Fn

FnPgSg vs FnPg

FnSg vs FnPg

FnPgSg vs FnSg

Fn Coverage

| Protein | FnPg vs Fn             |                      |          |          | Raw  |     | Normalized |          | Description                                                  | Log <sub>2</sub> Ratios |    |    |   |   |   |   |
|---------|------------------------|----------------------|----------|----------|------|-----|------------|----------|--------------------------------------------------------------|-------------------------|----|----|---|---|---|---|
|         | Log <sub>2</sub> Ratio | Log <sub>2</sub> Sum | q-Value  | p-Value  | FnPg | Fn  | FnPg       | Fn       |                                                              | -6                      | -4 | -2 | 0 | 2 | 4 | 6 |
| FN0336  | -1.726                 | 11.635               |          |          |      | 76  |            | 92.3177  | AAL94540.1   Hypothetical protein                            |                         |    |    |   |   |   |   |
|         |                        |                      |          |          | 31   | 86  | 31.0000    | 112.8153 |                                                              |                         |    |    |   |   |   |   |
| FN0341  | -0.776                 | 11.420               |          |          |      | 62  |            | 75.3118  | AAL94545.1   transport protein                               |                         |    |    |   |   |   |   |
|         |                        |                      |          |          | 40   | 47  | 40.0000    | 61.6548  |                                                              |                         |    |    |   |   |   |   |
| FN0342  | -0.221                 | 10.720               | 2.038e-1 | 5.707e-1 | 38   | 46  | 52.0653    | 55.8765  | AAL94546.1   Peptidyl-prolyl cis-trans isomerase             |                         |    |    |   |   |   |   |
|         |                        |                      |          |          | 24   | 25  | 24.0000    | 32.7951  |                                                              |                         |    |    |   |   |   |   |
| FN0343  |                        |                      |          |          |      | 4   |            | 4.8588   | AAL94547.1   Hypothetical protein                            |                         |    |    |   |   |   |   |
|         |                        |                      |          |          |      |     |            |          |                                                              |                         |    |    |   |   |   |   |
| FN0344  |                        |                      |          |          |      |     |            |          | AAL94548.1   Methyltransferase                               |                         |    |    |   |   |   |   |
|         |                        |                      |          |          |      | 9   |            | 11.8062  |                                                              |                         |    |    |   |   |   |   |
| FN0347  | -1.193                 | 12.183               | 1.878e-2 | 2.499e-2 | 14   | 78  | 19.1820    | 94.7471  | AAL94551.1   Phosphatidylserine decarboxylase                |                         |    |    |   |   |   |   |
|         |                        |                      |          |          | 71   | 85  | 71.0000    | 111.5034 |                                                              |                         |    |    |   |   |   |   |
| FN0348  | -0.459                 | 16.128               | 5.352e-2 | 9.837e-2 | 120  | 279 | 164.4168   | 338.9030 | AAL94552.1   Nicotinate phosphoribosyltransferase            |                         |    |    |   |   |   |   |
|         |                        |                      |          |          | 292  | 220 | 292.0000   | 288.5972 |                                                              |                         |    |    |   |   |   |   |
| FN0349  | 1.092                  | 7.766                | 3.465e-2 | 5.461e-2 | 11   | 8   | 15.0715    | 9.7176   | AAL94553.1   D-Tyr-tRNA <sup>Tyr</sup> deacylase             |                         |    |    |   |   |   |   |
|         |                        |                      |          |          | 28   | 8   | 28.0000    | 10.4944  |                                                              |                         |    |    |   |   |   |   |
| FN0351  | -0.512                 | 14.137               | 1.493e-1 | 3.774e-1 | 140  | 117 | 191.8196   | 142.1206 | AAL94555.1   unknown                                         |                         |    |    |   |   |   |   |
|         |                        |                      |          |          | 33   | 136 | 33.0000    | 178.4055 |                                                              |                         |    |    |   |   |   |   |
| FN0352  | 0.044                  | 11.266               | 2.911e-1 | 9.157e-1 | 21   | 47  | 28.7729    | 57.0912  | AAL94556.1   NA <sup>+</sup> /H <sup>+</sup> antiporter NHAC |                         |    |    |   |   |   |   |
|         |                        |                      |          |          | 72   | 31  | 72.0000    | 40.6660  |                                                              |                         |    |    |   |   |   |   |
| FN0355  | -0.213                 | 15.127               | 1.534e-1 | 3.911e-1 | 93   | 170 | 127.4230   | 206.5001 | AAL94558.1   S-adenosylmethionine synthetase                 |                         |    |    |   |   |   |   |
|         |                        |                      |          |          | 224  | 153 | 224.0000   | 200.7062 |                                                              |                         |    |    |   |   |   |   |
| FN0356  | -0.716                 | 10.040               | 4.226e-2 | 7.109e-2 | 26   | 35  | 35.6236    | 42.5147  | AAL94559.1   Lactoylglutathione lyase                        |                         |    |    |   |   |   |   |
|         |                        |                      |          |          | 15   | 31  | 15.0000    | 40.6660  |                                                              |                         |    |    |   |   |   |   |
| FN0357  | -0.326                 | 7.596                | 1.831e-1 | 4.972e-1 | 5    | 17  | 6.8507     | 20.6500  | AAL94560.1   ATP synthase epsilon chain, sodium ion specific |                         |    |    |   |   |   |   |
|         |                        |                      |          |          | 18   | 8   | 18.0000    | 10.4944  |                                                              |                         |    |    |   |   |   |   |
| FN0358  | -0.929                 | 17.355               | 1.835e-7 | 2.97e-9  | 212  | 470 | 290.4696   | 570.9119 | AAL94561.1   ATP synthase beta chain, sodium ion specific    |                         |    |    |   |   |   |   |
|         |                        |                      |          |          | 303  | 426 | 303.0000   | 558.8290 |                                                              |                         |    |    |   |   |   |   |
| FN0359  | -0.634                 | 11.962               | 2.378e-2 | 3.367e-2 | 47   | 68  | 64.3966    | 82.6000  | AAL94562.1   ATP synthase gamma chain, sodium ion specific   |                         |    |    |   |   |   |   |
|         |                        |                      |          |          | 37   | 57  | 37.0000    | 74.7729  |                                                              |                         |    |    |   |   |   |   |
| FN0360  | 0.202                  | 13.804               | 2.111e-3 | 1.401e-3 | 96   | 95  | 131.5334   | 115.3971 | AAL94563.1   ATP synthase alpha chain, sodium ion specific   |                         |    |    |   |   |   |   |
|         |                        |                      |          |          | 125  | 82  | 125.0000   | 107.5680 |                                                              |                         |    |    |   |   |   |   |

Show detected proteins only  
 Show all proteins  
 Filter by category:

Proteins found:  
1338

Enter (or paste) list of ORFs

Find ORFs

Test Cutoff

q-Value

p-Value

.005

| Signif | Direction | Applies To   |
|--------|-----------|--------------|
| yes    | +         | ratios, bars |
| no     | n/a       | bars         |
| yes    | -         | ratios, bars |
| yes    | +         | p-, q-Values |
| yes    | -         | p-, q-Values |

Dot Plots

Fn Summary Table FnPg vs Fn FnSg vs Fn FnPgSg vs Fn FnPgSg vs FnPg FnSg vs FnPg FnPgSg vs FnSg Fn Coverage

| Protein | FnPg vs Fn             |                      |          |          | Raw  |     | Normalized |          | Description                                                  | Log <sub>2</sub> Ratios |    |    |   |   |   |   |
|---------|------------------------|----------------------|----------|----------|------|-----|------------|----------|--------------------------------------------------------------|-------------------------|----|----|---|---|---|---|
|         | Log <sub>2</sub> Ratio | Log <sub>2</sub> Sum | q-Value  | p-Value  | FnPg | Fn  | FnPg       | Fn       |                                                              | -6                      | -4 | -2 | 0 | 2 | 4 | 6 |
| FN0361  | -0.808                 | 10.031               | 2.108e-2 | 2.895e-2 | 24   | 37  | 32.8834    | 44.9441  | AAL94564.1  ATP synthase delta chain, sodium ion specific    |                         |    |    |   |   |   |   |
|         |                        |                      |          |          | 16   | 31  | 16.0000    | 40.6660  |                                                              |                         |    |    |   |   |   |   |
| FN0362  | -0.554                 | 10.462               |          |          |      | 49  |            | 59.5206  | AAL94565.1  ATP synthase B chain, sodium ion specific        |                         |    |    |   |   |   |   |
|         |                        |                      |          |          | 31   | 24  | 31.0000    | 31.4833  |                                                              |                         |    |    |   |   |   |   |
| FN0364  | 1.724                  | 5.677                |          |          |      |     |            |          | AAL94567.1  ATP synthase A chain, sodium ion specific        |                         |    |    |   |   |   |   |
|         |                        |                      |          |          | 13   | 3   | 13.0000    | 3.9354   |                                                              |                         |    |    |   |   |   |   |
| FN0366  | -0.510                 | 15.695               | 5.096e-3 | 4.671e-3 | 127  | 228 | 174.0078   | 276.9530 | AAL94569.1  Phosphoglucosamine mutase                        |                         |    |    |   |   |   |   |
|         |                        |                      |          |          | 212  | 208 | 212.0000   | 272.8555 |                                                              |                         |    |    |   |   |   |   |
| FN0368  | 0.324                  | 13.237               | 1.183e-1 | 2.803e-1 | 59   | 69  | 80.8383    | 83.8147  | AAL94571.1  Adenylosuccinate lyase                           |                         |    |    |   |   |   |   |
|         |                        |                      |          |          | 139  | 70  | 139.0000   | 91.8264  |                                                              |                         |    |    |   |   |   |   |
| FN0370  | -0.675                 | 10.059               | 6.105e-2 | 1.189e-1 | 10   | 28  | 13.7014    | 34.0118  | AAL94573.1  Signal peptidase I                               |                         |    |    |   |   |   |   |
|         |                        |                      |          |          | 38   | 37  | 38.0000    | 48.5368  |                                                              |                         |    |    |   |   |   |   |
| FN0371  | -1.635                 | 11.082               | 9.831e-3 | 1.113e-2 | 32   | 66  | 43.8445    | 80.1706  | AAL94574.1  Hypothetical protein                             |                         |    |    |   |   |   |   |
|         |                        |                      |          |          | 9    | 64  | 9.0000     | 83.9555  |                                                              |                         |    |    |   |   |   |   |
| FN0374  | 1.120                  | 5.425                | 2.593e-2 | 3.754e-2 | 9    | 3   | 12.3313    | 3.6441   | AAL94577.1  Single-stranded-DNA-specific exonuclease recJ    |                         |    |    |   |   |   |   |
|         |                        |                      |          |          | 7    | 4   | 7.0000     | 5.2472   |                                                              |                         |    |    |   |   |   |   |
| FN0375  | 0.509                  | 17.587               | 7.141e-3 | 7.429e-3 | 353  | 297 | 483.6594   | 360.7677 | AAL94578.1  Iron(III)-binding protein                        |                         |    |    |   |   |   |   |
|         |                        |                      |          |          | 575  | 292 | 575.0000   | 383.0471 |                                                              |                         |    |    |   |   |   |   |
| FN0376  | 0.466                  | 12.667               | 1.783e-2 | 2.329e-2 | 61   | 59  | 83.5785    | 71.6677  | AAL94579.1  Iron(III)-transport ATP-binding protein sfuC     |                         |    |    |   |   |   |   |
|         |                        |                      |          |          | 106  | 50  | 106.0000   | 65.5903  |                                                              |                         |    |    |   |   |   |   |
| FN0377  |                        |                      |          |          |      |     |            |          | AAL94580.1  Iron(III)-transport system permease protein sfuB |                         |    |    |   |   |   |   |
|         |                        |                      |          |          |      | 9   |            | 11.8062  |                                                              |                         |    |    |   |   |   |   |
| FN0378  |                        |                      |          |          |      | 7   |            | 8.5029   | AAL94581.1  UDP-glucose 4-epimerase                          |                         |    |    |   |   |   |   |
|         |                        |                      |          |          |      | 7   |            | 9.1826   |                                                              |                         |    |    |   |   |   |   |
| FN0379  | -0.651                 | 6.644                | 4.499e-2 | 7.757e-2 | 8    | 12  | 10.9611    | 14.5765  | AAL94582.1  Hypothetical protein                             |                         |    |    |   |   |   |   |
|         |                        |                      |          |          | 5    | 8   | 5.0000     | 10.4944  |                                                              |                         |    |    |   |   |   |   |
| FN0380  | -2.167                 | 7.337                |          |          |      | 26  |            | 31.5824  | AAL94583.1  unknown                                          |                         |    |    |   |   |   |   |
|         |                        |                      |          |          | 6    | 17  | 6.0000     | 22.3007  |                                                              |                         |    |    |   |   |   |   |
| FN0381  |                        |                      |          |          |      | 15  |            | 18.2206  | AAL94584.1  unknown                                          |                         |    |    |   |   |   |   |
|         |                        |                      |          |          |      | 15  |            | 19.6771  |                                                              |                         |    |    |   |   |   |   |
| FN0382  |                        |                      |          |          |      | 8   |            | 9.7176   | AAL94585.1  Hypothetical protein                             |                         |    |    |   |   |   |   |
|         |                        |                      |          |          |      | 8   |            | 10.4944  |                                                              |                         |    |    |   |   |   |   |

Show detected proteins only  
 Show all proteins  
 Filter by category:

Proteins found: 1338

Test Cutoff

| Signif | Direction | Applies To   |
|--------|-----------|--------------|
| yes    | +         | ratios, bars |
| no     | n/a       | bars         |
| yes    | -         | ratios, bars |
| yes    | +         | p-, q-Values |
| yes    | -         |              |

Fn Summary Table

FnPg vs Fn

FnSg vs Fn

FnPgSg vs Fn

FnPgSg vs FnPg

FnSg vs FnPg

FnPgSg vs FnSg

Fn Coverage

| Protein | FnPg vs Fn             |                      |          |          | Raw  |      | Normalized |           | Description                                                    | Log <sub>2</sub> Ratios |    |    |   |   |   |   |
|---------|------------------------|----------------------|----------|----------|------|------|------------|-----------|----------------------------------------------------------------|-------------------------|----|----|---|---|---|---|
|         | Log <sub>2</sub> Ratio | Log <sub>2</sub> Sum | q-Value  | p-Value  | FnPg | Fn   | FnPg       | Fn        |                                                                | -6                      | -4 | -2 | 0 | 2 | 4 | 6 |
| FN0383  |                        |                      |          |          |      | 7    |            | 8.5029    | AAL94586.1  Lipopolysaccharide N-acetylglucosaminyltransferase |                         |    |    |   |   |   |   |
|         |                        |                      |          |          |      | 10   |            | 13.1181   |                                                                |                         |    |    |   |   |   |   |
| FN0384  | -3.389                 | 7.467                |          |          | 3    | 32   | 4.1104     | 38.8706   | AAL94587.1  Hypothetical protein                               |                         |    |    |   |   |   |   |
|         |                        |                      |          |          |      | 36   |            | 47.2250   |                                                                |                         |    |    |   |   |   |   |
| FN0385  |                        |                      |          |          |      |      |            |           | AAL94588.1  Hypothetical protein                               |                         |    |    |   |   |   |   |
|         |                        |                      |          |          | 5    |      |            | 5.0000    |                                                                |                         |    |    |   |   |   |   |
| FN0386  |                        |                      |          |          |      | 12   |            | 14.5765   | AAL94589.1  Hypothetical protein                               |                         |    |    |   |   |   |   |
|         |                        |                      |          |          |      | 11   |            | 14.4299   |                                                                |                         |    |    |   |   |   |   |
| FN0387  | -2.777                 | 11.772               | 7.82e-5  | 9.377e-6 | 14   | 121  | 19.1820    | 146.9795  | AAL94590.1  Fusobacterium outer membrane protein family        |                         |    |    |   |   |   |   |
|         |                        |                      |          |          | 26   | 124  | 26.0000    | 162.6639  |                                                                |                         |    |    |   |   |   |   |
| FN0390  | 1.070                  | 11.829               | 5.147e-2 | 9.318e-2 | 40   | 34   | 54.8056    | 41.3000   | AAL94593.1  Hypothetical protein                               |                         |    |    |   |   |   |   |
|         |                        |                      |          |          | 120  | 32   | 120.0000   | 41.9778   |                                                                |                         |    |    |   |   |   |   |
| FN0391  | 0.598                  | 9.079                | 1.758e-1 | 4.7e-1   | 6    | 16   | 8.2208     | 19.4353   | AAL94594.1  Hydrolase (HAD superfamily)                        |                         |    |    |   |   |   |   |
|         |                        |                      |          |          | 49   | 14   | 49.0000    | 18.3653   |                                                                |                         |    |    |   |   |   |   |
| FN0392  | -1.819                 | 6.462                |          |          |      | 15   |            | 18.2206   | AAL94595.1  Oxygen-independent coproporphyrinogen III oxidase  |                         |    |    |   |   |   |   |
|         |                        |                      |          |          | 5    | 13   | 5.0000     | 17.0535   |                                                                |                         |    |    |   |   |   |   |
| FN0393  | 0.932                  | 7.413                | 1.252e-2 | 1.484e-2 | 11   | 8    | 15.0715    | 9.7176    | AAL94596.1  Polysaccharide deacetylase                         |                         |    |    |   |   |   |   |
|         |                        |                      |          |          | 21   | 7    | 21.0000    | 9.1826    |                                                                |                         |    |    |   |   |   |   |
| FN0394  | 0.531                  | 7.684                | 1.818e-1 | 4.925e-1 | 4    | 11   | 5.4806     | 13.3618   | AAL94597.1  Outer membrane protein                             |                         |    |    |   |   |   |   |
|         |                        |                      |          |          | 29   | 8    | 29.0000    | 10.4944   |                                                                |                         |    |    |   |   |   |   |
| FN0396  | 0.402                  | 24.004               | 5.688e-4 | 1.869e-4 | 3549 | 2994 | 4862.6263  | 3636.8304 | AAL94599.1  Dipeptide-binding protein                          |                         |    |    |   |   |   |   |
|         |                        |                      |          |          | 4566 | 2667 | 4566.0000  | 3498.5847 |                                                                |                         |    |    |   |   |   |   |
| FN0397  | -0.052                 | 10.905               |          |          |      | 41   |            | 49.8030   | AAL94600.1  Dipeptide transport system permease protein dppB   |                         |    |    |   |   |   |   |
|         |                        |                      |          |          | 43   | 30   | 43.0000    | 39.3542   |                                                                |                         |    |    |   |   |   |   |
| FN0398  | -1.058                 | 11.387               | 8.884e-4 | 3.919e-4 | 29   | 56   | 39.7341    | 68.0235   | AAL94601.1  Dipeptide transport system permease protein dppC   |                         |    |    |   |   |   |   |
|         |                        |                      |          |          | 32   | 62   | 32.0000    | 81.3319   |                                                                |                         |    |    |   |   |   |   |
| FN0399  | -0.543                 | 15.278               | 1.413e-2 | 1.723e-2 | 98   | 178  | 134.2737   | 216.2177  | AAL94602.1  Dipeptide transport ATP-binding protein dppD       |                         |    |    |   |   |   |   |
|         |                        |                      |          |          | 196  | 202  | 196.0000   | 264.9847  |                                                                |                         |    |    |   |   |   |   |
| FN0400  | -0.684                 | 17.806               | 3.158e-3 | 2.414e-3 | 306  | 498  | 419.2628   | 604.9237  | AAL94603.1  Dipeptide transport ATP-binding protein dppF       |                         |    |    |   |   |   |   |
|         |                        |                      |          |          | 336  | 464  | 336.0000   | 608.6776  |                                                                |                         |    |    |   |   |   |   |
| FN0405  | -0.284                 | 12.911               | 1.443e-1 | 3.61e-1  | 38   | 86   | 52.0653    | 104.4647  | AAL94608.1  Tryptophanyl-tRNA synthetase                       |                         |    |    |   |   |   |   |
|         |                        |                      |          |          | 107  | 68   | 107.0000   | 89.2028   |                                                                |                         |    |    |   |   |   |   |

- Show detected proteins only
- Show all proteins

Filter by category:  
GO: amino acid transport

Proteins found:  
1338

Enter (or paste) list of ORFs

Find ORFs

Test

Cutoff

q-Value

p-Value

.005

| Signif | Direction | Applies To   |
|--------|-----------|--------------|
| yes    | +         | ratios, bars |
| no     | n/a       | bars         |
| yes    | -         | ratios, bars |
| yes    | +         | p-, q-Values |
| yes    | -         | p-, q-Values |

Dot Plots Dot Plots



Fn Summary Table FnPg vs Fn FnSg vs Fn FnPgSg vs Fn FnPgSg vs FnPg FnSg vs FnPg FnPgSg vs FnSg Fn Coverage

| Protein | FnPg vs Fn             |                      |          |          | Raw  |     | Normalized |          | Description                                                                  | Log <sub>2</sub> Ratios |    |    |   |   |   |   |
|---------|------------------------|----------------------|----------|----------|------|-----|------------|----------|------------------------------------------------------------------------------|-------------------------|----|----|---|---|---|---|
|         | Log <sub>2</sub> Ratio | Log <sub>2</sub> Sum | q-Value  | p-Value  | FnPg | Fn  | FnPg       | Fn       |                                                                              | -6                      | -4 | -2 | 0 | 2 | 4 | 6 |
| FN0406  | -1.164                 | 11.391               | 1.616e-7 | 2.24e-9  | 25   | 64  | 34.2535    | 77.7412  | AAL94609.1  Alanine racemase, biosynthetic                                   |                         |    |    |   |   |   |   |
|         |                        |                      |          |          | 35   | 59  | 35.0000    | 77.3965  |                                                                              |                         |    |    |   |   |   |   |
| FN0407  | -2.102                 | 10.887               |          |          |      | 75  |            | 91.1030  | AAL94610.1  Hypothetical protein                                             |                         |    |    |   |   |   |   |
|         |                        |                      |          |          | 21   | 68  | 21.0000    | 89.2028  |                                                                              |                         |    |    |   |   |   |   |
| FN0408  | -0.747                 | 12.388               | 5.938e-2 | 1.142e-1 | 19   | 86  | 26.0327    | 104.4647 | AAL94611.1  Acetyl-coenzyme A carboxylase carboxyl transferase subunit beta  |                         |    |    |   |   |   |   |
|         |                        |                      |          |          | 87   | 65  | 87.0000    | 85.2673  |                                                                              |                         |    |    |   |   |   |   |
| FN0409  | -1.080                 | 17.074               | 1.773e-3 | 1.08e-3  | 219  | 453 | 300.0606   | 550.2619 | AAL94612.1  Acetyl-coenzyme A carboxylase carboxyl transferase subunit alpha |                         |    |    |   |   |   |   |
|         |                        |                      |          |          | 211  | 404 | 211.0000   | 529.9693 |                                                                              |                         |    |    |   |   |   |   |
| FN0410  | -0.698                 | 13.649               | 2.14e-4  | 4.225e-5 | 62   | 120 | 84.9487    | 145.7647 | AAL94613.1  6-phosphofructokinase                                            |                         |    |    |   |   |   |   |
|         |                        |                      |          |          | 93   | 109 | 93.0000    | 142.9868 |                                                                              |                         |    |    |   |   |   |   |
| FN0411  |                        |                      |          |          |      |     |            |          | AAL94614.1  putative alpha helix protein                                     |                         |    |    |   |   |   |   |
|         |                        |                      |          |          |      | 8   |            | 10.4944  |                                                                              |                         |    |    |   |   |   |   |
| FN0412  |                        |                      |          |          |      |     |            |          | AAL94615.1  Recombination protein recR                                       |                         |    |    |   |   |   |   |
|         |                        |                      |          |          |      | 10  |            | 13.1181  |                                                                              |                         |    |    |   |   |   |   |
| FN0413  | 0.938                  | 4.669                |          |          | 8    | 3   | 10.9611    | 3.6441   | AAL94616.1  unknown                                                          |                         |    |    |   |   |   |   |
|         |                        |                      |          |          | 3    |     | 3.0000     |          |                                                                              |                         |    |    |   |   |   |   |
| FN0416  | -1.077                 | 8.326                |          |          | 9    | 18  | 12.3313    | 21.8647  | AAL94619.1  Type III restriction-modification system methylation subunit     |                         |    |    |   |   |   |   |
|         |                        |                      |          |          |      | 23  |            | 30.1715  |                                                                              |                         |    |    |   |   |   |   |
| FN0417  | -1.788                 | 9.867                |          |          | 12   | 46  | 16.4417    | 55.8765  | AAL94620.1  Type III restriction-modification system restriction subunit     |                         |    |    |   |   |   |   |
|         |                        |                      |          |          |      | 44  |            | 57.7194  |                                                                              |                         |    |    |   |   |   |   |
| FN0418  |                        |                      |          |          |      |     |            |          | AAL94621.1  Uracil phosphoribosyltransferase                                 |                         |    |    |   |   |   |   |
|         |                        |                      |          |          | 67   |     | 67.0000    |          |                                                                              |                         |    |    |   |   |   |   |
| FN0419  | 0.272                  | 7.477                |          |          | 9    | 10  | 12.3313    | 12.1471  | AAL94622.1  Aspartate carbamoyltransferase                                   |                         |    |    |   |   |   |   |
|         |                        |                      |          |          | 17   |     | 17.0000    |          |                                                                              |                         |    |    |   |   |   |   |
| FN0420  | 1.054                  | 8.770                | 1.263e-1 | 3.048e-1 | 6    | 12  | 8.2208     | 14.5765  | AAL94623.1  Dihydroorotase                                                   |                         |    |    |   |   |   |   |
|         |                        |                      |          |          | 52   | 11  | 52.0000    | 14.4299  |                                                                              |                         |    |    |   |   |   |   |
| FN0421  | 0.774                  | 9.870                |          |          |      | 18  |            | 21.8647  | AAL94624.1  Carbamoyl-phosphate synthase small chain                         |                         |    |    |   |   |   |   |
|         |                        |                      |          |          | 40   | 19  | 40.0000    | 24.9243  |                                                                              |                         |    |    |   |   |   |   |
| FN0422  | -0.715                 | 13.950               | 9.791e-2 | 2.211e-1 | 20   | 125 | 27.4028    | 151.8383 | AAL94625.1  Carbamoyl-phosphate synthase large chain                         |                         |    |    |   |   |   |   |
|         |                        |                      |          |          | 169  | 130 | 169.0000   | 170.5347 |                                                                              |                         |    |    |   |   |   |   |
| FN0423  | 0.481                  | 7.519                |          |          |      | 7   |            | 8.5029   | AAL94626.1  Dihydroorotate dehydrogenase electron transfer subunit           |                         |    |    |   |   |   |   |
|         |                        |                      |          |          | 16   | 11  | 16.0000    | 14.4299  |                                                                              |                         |    |    |   |   |   |   |

Show detected proteins only  
 Show all proteins  
 Filter by category:

Proteins found: 1338

Enter (or paste) list of ORFs

Find ORFs

Test Cutoff

q-Value

p-Value

.005

| Signif | Direction | Applies To   |
|--------|-----------|--------------|
| yes    | +         | ratios, bars |
| no     | n/a       | bars         |
| yes    | -         | ratios, bars |
| yes    | +         | p-, q-Values |
| yes    | -         | p-, q-Values |

Dot Plots Dot Plots

Fn Summary Table FnPg vs Fn FnSg vs Fn FnPgSg vs Fn FnPgSg vs FnPg FnSg vs FnPg FnPgSg vs FnSg Fn Coverage

| Protein | FnPg vs Fn             |                      |          |          | Raw  |     | Normalized |          | Description                                                                  | Log <sub>2</sub> Ratios |    |    |   |   |   |   |
|---------|------------------------|----------------------|----------|----------|------|-----|------------|----------|------------------------------------------------------------------------------|-------------------------|----|----|---|---|---|---|
|         | Log <sub>2</sub> Ratio | Log <sub>2</sub> Sum | q-Value  | p-Value  | FnPg | Fn  | FnPg       | Fn       |                                                                              | -6                      | -4 | -2 | 0 | 2 | 4 | 6 |
| FN0424  | 0.993                  | 5.667                | 1.049e-1 | 2.411e-1 | 3    | 4   | 4.1104     | 4.8588   | AAL94627.1  Dihydroorotate dehydrogenase                                     |                         |    |    |   |   |   |   |
|         |                        |                      |          |          | 16   | 4   | 16.0000    | 5.2472   |                                                                              |                         |    |    |   |   |   |   |
| FN0426  | 1.087                  | 9.071                | 1.221e-1 | 2.916e-1 | 7    | 10  | 9.5910     | 12.1471  | AAL94629.1  Orotidine 5'-phosphate decarboxylase                             |                         |    |    |   |   |   |   |
|         |                        |                      |          |          | 58   | 15  | 58.0000    | 19.6771  |                                                                              |                         |    |    |   |   |   |   |
| FN0427  | -0.092                 | 11.470               | 1.324e-1 | 3.233e-1 | 41   | 43  | 56.1757    | 52.2324  | AAL94630.1  Orotate phosphoribosyltransferase                                |                         |    |    |   |   |   |   |
|         |                        |                      |          |          | 47   | 44  | 47.0000    | 57.7194  |                                                                              |                         |    |    |   |   |   |   |
| FN0430  | -1.332                 | 14.971               | 4.591e-3 | 4.041e-3 | 51   | 223 | 69.8771    | 270.8795 | AAL94633.1  LSU ribosomal protein L19P                                       |                         |    |    |   |   |   |   |
|         |                        |                      |          |          | 156  | 227 | 156.0000   | 297.7798 |                                                                              |                         |    |    |   |   |   |   |
| FN0435  | 0.230                  | 11.661               | 2.416e-1 | 7.102e-1 | 17   | 39  | 23.2924    | 47.3735  | AAL94634.1  Purine nucleoside phosphorylase                                  |                         |    |    |   |   |   |   |
|         |                        |                      |          |          | 100  | 44  | 100.0000   | 57.7194  |                                                                              |                         |    |    |   |   |   |   |
| FN0436  | 1.228                  | 11.009               | 3.199e-2 | 4.913e-2 | 35   | 24  | 47.9549    | 29.1529  | AAL94635.1  regulator of kinase autophosphorylation inhibitor                |                         |    |    |   |   |   |   |
|         |                        |                      |          |          | 91   | 23  | 91.0000    | 30.1715  |                                                                              |                         |    |    |   |   |   |   |
| FN0437  | 0.279                  | 7.134                | 2.359e-1 | 6.883e-1 | 3    | 8   | 4.1104     | 9.7176   | AAL94636.1  kinase autophosphorylation inhibitor KipI                        |                         |    |    |   |   |   |   |
|         |                        |                      |          |          | 22   | 9   | 22.0000    | 11.8062  |                                                                              |                         |    |    |   |   |   |   |
| FN0438  |                        |                      |          |          |      |     |            |          | AAL94637.1  transporter protein                                              |                         |    |    |   |   |   |   |
|         |                        |                      |          |          |      | 9   |            | 11.8062  |                                                                              |                         |    |    |   |   |   |   |
| FN0439  | 0.336                  | 12.037               | 2.36e-1  | 6.889e-1 | 10   | 41  | 13.7014    | 49.8030  | AAL94638.1  Lactam utilization protein LAMB                                  |                         |    |    |   |   |   |   |
|         |                        |                      |          |          | 132  | 50  | 132.0000   | 65.5903  |                                                                              |                         |    |    |   |   |   |   |
| FN0445  |                        |                      |          |          |      |     |            |          | AAL94641.1  Hypothetical protein                                             |                         |    |    |   |   |   |   |
|         |                        |                      |          |          |      | 5   |            | 6.0735   |                                                                              |                         |    |    |   |   |   |   |
| FN0446  | -1.008                 | 7.281                | 6.665e-5 | 7.553e-6 | 7    | 14  | 9.5910     | 17.0059  | AAL94642.1  Hypothetical protein                                             |                         |    |    |   |   |   |   |
|         |                        |                      |          |          | 8    | 14  | 8.0000     | 18.3653  |                                                                              |                         |    |    |   |   |   |   |
| FN0447  | 0.262                  | 4.908                |          |          |      |     |            |          | AAL94643.1  NIFS protein                                                     |                         |    |    |   |   |   |   |
|         |                        |                      |          |          | 6    | 3   | 6.0000     | 3.9354   |                                                                              |                         |    |    |   |   |   |   |
| FN0450  | -1.177                 | 9.532                | 4.1e-2   | 6.82e-2  | 14   | 22  | 19.1820    | 26.7235  | AAL94646.1  ABC transporter ATP-binding protein                              |                         |    |    |   |   |   |   |
|         |                        |                      |          |          | 17   | 42  | 17.0000    | 55.0958  |                                                                              |                         |    |    |   |   |   |   |
| FN0451  | -0.516                 | 6.131                |          |          |      |     |            |          | AAL94647.1  Hypothetical protein                                             |                         |    |    |   |   |   |   |
|         |                        |                      |          |          | 7    | 6   | 7.0000     | 7.8708   |                                                                              |                         |    |    |   |   |   |   |
| FN0452  | -0.429                 | 18.476               | 1.721e-1 | 4.565e-1 | 647  | 592 | 886.4805   | 719.1061 | AAL94648.1  Glucosamine--fructose-6-phosphate aminotransferase (isomerizing) |                         |    |    |   |   |   |   |
|         |                        |                      |          |          | 154  | 520 | 154.0000   | 682.1387 |                                                                              |                         |    |    |   |   |   |   |
| FN0453  | 0.787                  | 16.502               | 9.092e-3 | 1.012e-2 | 255  | 195 | 349.3857   | 236.8677 | AAL94649.1  Xaa-Pro aminopeptidase                                           |                         |    |    |   |   |   |   |
|         |                        |                      |          |          | 451  | 173 | 451.0000   | 226.9423 |                                                                              |                         |    |    |   |   |   |   |

Show detected proteins only  
 Show all proteins  
 Filter by category:

Proteins found: 1338

Enter (or paste) list of ORFs

Find ORFs

Test Cutoff

q-Value

p-Value

.005

| Signif | Direction | Applies To   |
|--------|-----------|--------------|
| yes    | +         | ratios, bars |
| no     | n/a       | bars         |
| yes    | -         | ratios, bars |
| yes    | +         | p-, q-Values |
| yes    | -         | p-, q-Values |

Dot Plots

Fn Summary Table FnPg vs Fn FnSg vs Fn FnPgSg vs Fn FnPgSg vs FnPg FnSg vs FnPg FnPgSg vs FnSg Fn Coverage

| Protein | FnPg vs Fn             |                      |          |          | Raw  |      | Normalized |           | Description                                                    | Log <sub>2</sub> Ratios |    |    |   |   |   |   |
|---------|------------------------|----------------------|----------|----------|------|------|------------|-----------|----------------------------------------------------------------|-------------------------|----|----|---|---|---|---|
|         | Log <sub>2</sub> Ratio | Log <sub>2</sub> Sum | q-Value  | p-Value  | FnPg | Fn   | FnPg       | Fn        |                                                                | -6                      | -4 | -2 | 0 | 2 | 4 | 6 |
| FN0454  | 0.855                  | 13.882               | 7.932e-2 | 1.68e-1  | 69   | 77   | 94.5396    | 93.5324   | AAL94650.1  Aldehyde dehydrogenase B                           |                         |    |    |   |   |   |   |
|         |                        |                      |          |          | 236  | 68   | 236.0000   | 89.2028   |                                                                |                         |    |    |   |   |   |   |
| FN0455  | 1.074                  | 16.135               | 4.143e-3 | 3.49e-3  | 315  | 150  | 431.5941   | 182.2059  | AAL94651.1  Rubrerythrin                                       |                         |    |    |   |   |   |   |
|         |                        |                      |          |          | 347  | 143  | 347.0000   | 187.5882  |                                                                |                         |    |    |   |   |   |   |
| FN0456  | -2.394                 | 10.091               | 2.686e-4 | 6.088e-5 | 13   | 62   | 17.8118    | 75.3118   | AAL94652.1  Hypothetical cytosolic protein                     |                         |    |    |   |   |   |   |
|         |                        |                      |          |          | 11   | 58   | 11.0000    | 76.0847   |                                                                |                         |    |    |   |   |   |   |
| FN0458  | 1.533                  | 5.806                | 2.136e-2 | 2.941e-2 | 12   | 4    | 16.4417    | 4.8588    | AAL94654.1  Hypothetical Exported Protein                      |                         |    |    |   |   |   |   |
|         |                        |                      |          |          | 9    | 3    | 9.0000     | 3.9354    |                                                                |                         |    |    |   |   |   |   |
| FN0459  |                        |                      |          |          |      | 8    |            | 9.7176    | AAL94655.1  Hypothetical exported 24-amino acid repeat protein |                         |    |    |   |   |   |   |
|         |                        |                      |          |          |      | 8    |            | 10.4944   |                                                                |                         |    |    |   |   |   |   |
| FN0460  | -0.196                 | 11.810               |          |          |      | 57   |            | 69.2383   | AAL94656.1  Delta-aminolevulinic acid dehydratase              |                         |    |    |   |   |   |   |
|         |                        |                      |          |          | 56   | 45   | 56.0000    | 59.0312   |                                                                |                         |    |    |   |   |   |   |
| FN0461  | 0.389                  | 16.697               | 1.504e-1 | 3.809e-1 | 381  | 227  | 522.0233   | 275.7383  | AAL94657.1  Probable sigma(54) modulation protein              |                         |    |    |   |   |   |   |
|         |                        |                      |          |          | 224  | 224  | 224.0000   | 293.8444  |                                                                |                         |    |    |   |   |   |   |
| FN0462  | 0.045                  | 11.170               | 2.852e-1 | 8.896e-1 | 23   | 40   | 31.5132    | 48.5882   | AAL94658.1  DNA mismatch repair protein mutL                   |                         |    |    |   |   |   |   |
|         |                        |                      |          |          | 66   | 35   | 66.0000    | 45.9132   |                                                                |                         |    |    |   |   |   |   |
| FN0465  | 0.270                  | 16.294               | 2.351e-1 | 6.853e-1 | 377  | 195  | 516.5427   | 236.8677  | AAL94661.1  Hypothetical protein                               |                         |    |    |   |   |   |   |
|         |                        |                      |          |          | 106  | 213  | 106.0000   | 279.4145  |                                                                |                         |    |    |   |   |   |   |
| FN0466  | 0.383                  | 17.561               | 5.203e-2 | 9.458e-2 | 428  | 323  | 586.4199   | 392.3501  | AAL94662.1  Lysyl-tRNA synthetase                              |                         |    |    |   |   |   |   |
|         |                        |                      |          |          | 418  | 288  | 418.0000   | 377.7999  |                                                                |                         |    |    |   |   |   |   |
| FN0470  | -0.034                 | 18.282               | 2.706e-1 | 8.272e-1 | 343  | 430  | 469.9580   | 522.3237  | AAL94666.1  Putative efflux pump component MtrF                |                         |    |    |   |   |   |   |
|         |                        |                      |          |          | 646  | 473  | 646.0000   | 620.4839  |                                                                |                         |    |    |   |   |   |   |
| FN0472  | 1.659                  | 24.440               | 5.982e-3 | 5.795e-3 | 7225 | 2271 | 9899.2604  | 2758.5978 | AAL94668.1  Flavodoxin                                         |                         |    |    |   |   |   |   |
|         |                        |                      |          |          | 7052 | 1990 | 7052.0000  | 2610.4925 |                                                                |                         |    |    |   |   |   |   |
| FN0474  |                        |                      |          |          |      | 6    |            | 7.8708    | AAL94670.1  Acriflavin resistance protein B                    |                         |    |    |   |   |   |   |
|         |                        |                      |          |          |      |      |            |           |                                                                |                         |    |    |   |   |   |   |
| FN0475  | -1.548                 | 10.467               |          |          |      | 53   |            | 64.3794   | AAL94671.1  MIAB protein                                       |                         |    |    |   |   |   |   |
|         |                        |                      |          |          | 22   | 49   | 22.0000    | 64.2785   |                                                                |                         |    |    |   |   |   |   |
| FN0476  | -0.244                 | 11.690               | 1.564e-1 | 4.011e-1 | 26   | 49   | 35.6236    | 59.5206   | AAL94672.1  Transcription termination factor rho               |                         |    |    |   |   |   |   |
|         |                        |                      |          |          | 70   | 50   | 70.0000    | 65.5903   |                                                                |                         |    |    |   |   |   |   |
| FN0477  | -2.372                 | 10.157               | 4.722e-6 | 2.484e-7 | 10   | 65   | 13.7014    | 78.9559   | AAL94673.1  Cell wall endopeptidase family M23/M37             |                         |    |    |   |   |   |   |
|         |                        |                      |          |          | 16   | 57   | 16.0000    | 74.7729   |                                                                |                         |    |    |   |   |   |   |

Show detected proteins only  
 Show all proteins  
 Filter by category:

Proteins found:  
1338

Enter (or paste) list of ORFs

Find ORFs

Test Cutoff

q-Value

p-Value

.005

| Signif | Direction | Applies To   |
|--------|-----------|--------------|
| yes    | +         | ratios, bars |
| no     | n/a       | bars         |
| yes    | -         | ratios, bars |
| yes    | +         | p-, q-Values |
| yes    | -         | p-, q-Values |

Dot Plots

Fn Summary Table FnPg vs Fn FnSg vs Fn FnPgSg vs Fn FnPgSg vs FnPg FnSg vs FnPg FnPgSg vs FnSg Fn Coverage

| Protein | FnPg vs Fn             |                      |          |          | Raw   |      | Normalized |           | Description                                           | Log <sub>2</sub> Ratios |    |    |   |   |   |   |
|---------|------------------------|----------------------|----------|----------|-------|------|------------|-----------|-------------------------------------------------------|-------------------------|----|----|---|---|---|---|
|         | Log <sub>2</sub> Ratio | Log <sub>2</sub> Sum | q-Value  | p-Value  | FnPg  | Fn   | FnPg       | Fn        |                                                       | -6                      | -4 | -2 | 0 | 2 | 4 | 6 |
| FN0478  | 1.361                  | 8.814                |          |          |       | 11   |            | 13.3618   | AAL94674.1  GcpE protein                              |                         |    |    |   |   |   |   |
|         |                        |                      |          |          | 34    | 10   | 34.0000    | 13.1181   |                                                       |                         |    |    |   |   |   |   |
| FN0481  | -0.697                 | 7.616                |          |          |       | 11   |            | 13.3618   | AAL94677.1  unknown                                   |                         |    |    |   |   |   |   |
|         |                        |                      |          |          | 11    | 17   | 11.0000    | 22.3007   |                                                       |                         |    |    |   |   |   |   |
| FN0482  | -2.778                 | 7.948                |          |          |       | 44   |            | 53.4471   | AAL94678.1  LSU ribosomal protein L31P                |                         |    |    |   |   |   |   |
|         |                        |                      |          |          | 6     | 22   | 6.0000     | 28.8597   |                                                       |                         |    |    |   |   |   |   |
| FN0483  | -1.016                 | 13.224               | 8.106e-3 | 8.797e-3 | 34    | 120  | 46.5848    | 145.7647  | AAL94679.1  Uracil phosphoribosyltransferase          |                         |    |    |   |   |   |   |
|         |                        |                      |          |          | 91    | 101  | 91.0000    | 132.4923  |                                                       |                         |    |    |   |   |   |   |
| FN0484  | -0.959                 | 5.603                |          |          |       | 8    |            | 9.7176    | AAL94680.1  Lipase                                    |                         |    |    |   |   |   |   |
|         |                        |                      |          |          | 5     |      | 5.0000     |           |                                                       |                         |    |    |   |   |   |   |
| FN0487  | -0.121                 | 20.283               | 2.279e-1 | 6.579e-1 | 548   | 933  | 750.8366   | 1133.3209 | AAL94683.1  2-hydroxyglutarate dehydrogenase          |                         |    |    |   |   |   |   |
|         |                        |                      |          |          | 1416  | 932  | 1416.0000  | 1222.6025 |                                                       |                         |    |    |   |   |   |   |
| FN0488  | 0.305                  | 23.556               | 1.465e-1 | 3.683e-1 | 1959  | 2530 | 2684.1040  | 3073.2067 | AAL94684.1  NAD-specific glutamate dehydrogenase      |                         |    |    |   |   |   |   |
|         |                        |                      |          |          | 5124  | 2474 | 5124.0000  | 3245.4062 |                                                       |                         |    |    |   |   |   |   |
| FN0489  | -1.186                 | 8.105                |          |          |       | 25   |            | 30.3677   | AAL94685.1  Prolipoprotein diacylglycerol transferase |                         |    |    |   |   |   |   |
|         |                        |                      |          |          | 11    | 15   | 11.0000    | 19.6771   |                                                       |                         |    |    |   |   |   |   |
| FN0490  |                        |                      |          |          |       |      |            |           | AAL94686.1  Integral membrane protein                 |                         |    |    |   |   |   |   |
|         |                        |                      |          |          |       | 4    |            | 5.2472    |                                                       |                         |    |    |   |   |   |   |
| FN0491  | 1.570                  | 13.188               | 5.768e-2 | 1.094e-1 | 59    | 61   | 80.8383    | 74.0971   | AAL94687.1  Alanine racemase                          |                         |    |    |   |   |   |   |
|         |                        |                      |          |          | 252   | 29   | 252.0000   | 38.0424   |                                                       |                         |    |    |   |   |   |   |
| FN0493  | -0.264                 | 8.762                | 1.677e-1 | 4.405e-1 | 19    | 16   | 26.0327    | 19.4353   | AAL94689.1  Hypothetical protein                      |                         |    |    |   |   |   |   |
|         |                        |                      |          |          | 12    | 20   | 12.0000    | 26.2361   |                                                       |                         |    |    |   |   |   |   |
| FN0494  | -1.417                 | 17.059               | 1.5e-4   | 2.529e-5 | 136   | 464  | 186.3390   | 563.6237  | AAL94690.1  Short chain dehydrogenase                 |                         |    |    |   |   |   |   |
|         |                        |                      |          |          | 266   | 491  | 266.0000   | 644.0964  |                                                       |                         |    |    |   |   |   |   |
| FN0495  | 1.116                  | 25.792               | 5.159e-5 | 5.034e-6 | 8224  | 4420 | 11268.030  | 5369.0015 | AAL94691.1  Acetyl-CoA acetyltransferase              |                         |    |    |   |   |   |   |
|         |                        |                      |          |          | 11175 | 3801 | 11175.000  | 4986.1718 |                                                       |                         |    |    |   |   |   |   |
| FN0496  |                        |                      |          |          |       |      |            |           | AAL94692.1  unknown                                   |                         |    |    |   |   |   |   |
|         |                        |                      |          |          |       | 6    |            | 7.8708    |                                                       |                         |    |    |   |   |   |   |
| FN0501  | 0.635                  | 16.730               | 9.468e-2 | 2.115e-1 | 183   | 199  | 250.7356   | 241.7265  | AAL94697.1  Ornithine decarboxylase                   |                         |    |    |   |   |   |   |
|         |                        |                      |          |          | 571   | 219  | 571.0000   | 287.2854  |                                                       |                         |    |    |   |   |   |   |
| FN0502  | 1.032                  | 7.887                |          |          |       | 8    |            | 9.7176    | AAL94698.1  Phosphoheptose isomerase                  |                         |    |    |   |   |   |   |
|         |                        |                      |          |          | 22    | 9    | 22.0000    | 11.8062   |                                                       |                         |    |    |   |   |   |   |

Show detected proteins only  
 Show all proteins  
 Filter by category:

Proteins found:  
1338

Enter (or paste) list of ORFs

Find ORFs

Test Cutoff

q-Value

p-Value

.005

| Signif | Direction | Applies To   |
|--------|-----------|--------------|
| yes    | +         | ratios, bars |
| no     | n/a       | bars         |
| yes    | -         | ratios, bars |
| yes    | +         | p-, q-Values |
| yes    | -         |              |

Dot Plots

Fn Summary Table FnPg vs Fn FnSg vs Fn FnPgSg vs Fn FnPgSg vs FnPg FnSg vs FnPg FnPgSg vs FnSg Fn Coverage

| Protein | FnPg vs Fn             |                      |          |          | Raw  |     | Normalized |          | Description                                                    | Log <sub>2</sub> Ratios |    |    |   |   |   |   |
|---------|------------------------|----------------------|----------|----------|------|-----|------------|----------|----------------------------------------------------------------|-------------------------|----|----|---|---|---|---|
|         | Log <sub>2</sub> Ratio | Log <sub>2</sub> Sum | q-Value  | p-Value  | FnPg | Fn  | FnPg       | Fn       |                                                                | -6                      | -4 | -2 | 0 | 2 | 4 | 6 |
| FN0503  | -0.592                 | 11.037               | 4.431e-2 | 7.591e-2 | 18   | 43  | 24.6625    | 52.2324  | AAL94699.1  Transcriptional regulatory protein, LYSR family    |                         |    |    |   |   |   |   |
|         |                        |                      |          |          | 50   | 46  | 50.0000    | 60.3430  |                                                                |                         |    |    |   |   |   |   |
| FN0505  | 0.947                  | 11.277               | 7.569e-2 | 1.579e-1 | 28   | 31  | 38.3639    | 37.6559  | AAL94701.1  Anthranilate synthase component II                 |                         |    |    |   |   |   |   |
|         |                        |                      |          |          | 100  | 26  | 100.0000   | 34.1069  |                                                                |                         |    |    |   |   |   |   |
| FN0506  | -0.638                 | 14.994               | 2.51e-2  | 3.606e-2 | 134  | 182 | 183.5987   | 221.0765 | AAL94702.1  Arginyl-tRNA synthetase                            |                         |    |    |   |   |   |   |
|         |                        |                      |          |          | 106  | 175 | 106.0000   | 229.5659 |                                                                |                         |    |    |   |   |   |   |
| FN0511  | 0.404                  | 11.177               | 2.162e-1 | 6.149e-1 | 10   | 30  | 13.7014    | 36.4412  | AAL94707.1  D-lactate dehydrogenase                            |                         |    |    |   |   |   |   |
|         |                        |                      |          |          | 97   | 36  | 97.0000    | 47.2250  |                                                                |                         |    |    |   |   |   |   |
| FN0512  | 0.714                  | 15.779               | 4.243e-4 | 1.178e-4 | 223  | 145 | 305.5412   | 176.1324 | AAL94708.1  Flavoprotein                                       |                         |    |    |   |   |   |   |
|         |                        |                      |          |          | 302  | 148 | 302.0000   | 194.1472 |                                                                |                         |    |    |   |   |   |   |
| FN0513  | -1.712                 | 8.768                | 1.029e-3 | 4.909e-4 | 11   | 32  | 15.0715    | 38.8706  | AAL94709.1  Flavodoxin                                         |                         |    |    |   |   |   |   |
|         |                        |                      |          |          | 8    | 28  | 8.0000     | 36.7305  |                                                                |                         |    |    |   |   |   |   |
| FN0515  | -0.928                 | 4.098                |          |          |      | 4   |            | 4.8588   | AAL94711.1  Acriflavin resistance protein D                    |                         |    |    |   |   |   |   |
|         |                        |                      |          |          | 3    | 5   | 3.0000     | 6.5590   |                                                                |                         |    |    |   |   |   |   |
| FN0516  |                        |                      |          |          |      |     |            |          | AAL94712.1  Acriflavin resistance protein E                    |                         |    |    |   |   |   |   |
|         |                        |                      |          |          | 4    |     | 4.0000     |          |                                                                |                         |    |    |   |   |   |   |
| FN0517  |                        |                      |          |          |      |     |            |          | AAL94713.1  Outer membrane protein toIC                        |                         |    |    |   |   |   |   |
|         |                        |                      |          |          | 5    |     | 5.0000     |          |                                                                |                         |    |    |   |   |   |   |
| FN0519  | 0.080                  | 6.962                | 2.602e-1 | 7.842e-1 | 8    | 6   | 10.9611    | 7.2882   | AAL94715.1  Hypothetical exported 24-amino acid repeat protein |                         |    |    |   |   |   |   |
|         |                        |                      |          |          | 12   | 11  | 12.0000    | 14.4299  |                                                                |                         |    |    |   |   |   |   |
| FN0522  | 0.833                  | 5.810                |          |          |      | 6   |            | 7.2882   | AAL94718.1  Exonuclease SBCC                                   |                         |    |    |   |   |   |   |
|         |                        |                      |          |          | 10   | 3   | 10.0000    | 3.9354   |                                                                |                         |    |    |   |   |   |   |
| FN0523  | -2.435                 | 6.514                |          |          | 3    | 15  | 4.1104     | 18.2206  | AAL94719.1  Exonuclease SBCCD                                  |                         |    |    |   |   |   |   |
|         |                        |                      |          |          |      | 20  |            | 26.2361  |                                                                |                         |    |    |   |   |   |   |
| FN0524  |                        |                      |          |          | 5    |     | 6.8507     |          | AAL94720.1  DNA helicase II                                    |                         |    |    |   |   |   |   |
|         |                        |                      |          |          | 9    |     | 9.0000     |          |                                                                |                         |    |    |   |   |   |   |
| FN0525  | -1.036                 | 14.898               | 3.154e-2 | 4.824e-2 | 38   | 196 | 52.0653    | 238.0824 | AAL94721.1  Penicillin-binding protein                         |                         |    |    |   |   |   |   |
|         |                        |                      |          |          | 192  | 200 | 192.0000   | 262.3611 |                                                                |                         |    |    |   |   |   |   |
| FN0526  | 0.310                  | 11.406               |          |          |      | 36  |            | 43.7294  | AAL94722.1  Florfenicol resistance protein                     |                         |    |    |   |   |   |   |
|         |                        |                      |          |          | 58   | 38  | 58.0000    | 49.8486  |                                                                |                         |    |    |   |   |   |   |
| FN0527  | 0.950                  | 9.787                | 6.384e-3 | 6.342e-3 | 26   | 19  | 35.6236    | 23.0794  | AAL94723.1  Alanyl-tRNA synthetase                             |                         |    |    |   |   |   |   |
|         |                        |                      |          |          | 47   | 15  | 47.0000    | 19.6771  |                                                                |                         |    |    |   |   |   |   |

Show detected proteins only  
 Show all proteins  
 Filter by category:

Proteins found: 1338

Enter (or paste) list of ORFs

Find ORFs

Test Cutoff

q-Value

p-Value

.005

| Signif | Direction | Applies To   |
|--------|-----------|--------------|
| yes    | +         | ratios, bars |
| no     | n/a       | bars         |
| yes    | -         | ratios, bars |
| yes    | +         | p-, q-Values |
| yes    | -         | p-, q-Values |

Dot Plots

Fn Summary Table FnPg vs Fn FnSg vs Fn FnPgSg vs Fn FnPgSg vs FnPg FnSg vs FnPg FnPgSg vs FnSg Fn Coverage

| Protein | FnPg vs Fn             |                      |          |          | Raw  |      | Normalized |           | Description                                                   | Log <sub>2</sub> Ratios |    |    |   |   |   |   |
|---------|------------------------|----------------------|----------|----------|------|------|------------|-----------|---------------------------------------------------------------|-------------------------|----|----|---|---|---|---|
|         | Log <sub>2</sub> Ratio | Log <sub>2</sub> Sum | q-Value  | p-Value  | FnPg | Fn   | FnPg       | Fn        |                                                               | -6                      | -4 | -2 | 0 | 2 | 4 | 6 |
| FN0528  | -2.764                 | 18.819               | 1.531e-3 | 8.813e-4 | 340  | 1436 | 465.8475   | 1744.3181 | AAL94724.1  Cold shock protein                                |                         |    |    |   |   |   |   |
|         |                        |                      |          |          | 56   | 1373 | 56.0000    | 1801.1086 |                                                               |                         |    |    |   |   |   |   |
| FN0535  | 0.648                  | 10.623               | 3.787e-3 | 3.085e-3 | 39   | 22   | 53.4355    | 26.7235   | AAL94731.1  Hypothetical protein                              |                         |    |    |   |   |   |   |
|         |                        |                      |          |          | 46   | 28   | 46.0000    | 36.7305   |                                                               |                         |    |    |   |   |   |   |
| FN0536  | -0.352                 | 15.236               | 7.724e-2 | 1.622e-1 | 94   | 184  | 128.7931   | 223.5059  | AAL94732.1  DNA polymerase III, beta chain                    |                         |    |    |   |   |   |   |
|         |                        |                      |          |          | 219  | 168  | 219.0000   | 220.3833  |                                                               |                         |    |    |   |   |   |   |
| FN0540  | -0.944                 | 11.020               | 4.112e-2 | 6.849e-2 | 10   | 49   | 13.7014    | 59.5206   | AAL94736.1  Glutamate-1-semialdehyde 2,1-aminomutase          |                         |    |    |   |   |   |   |
|         |                        |                      |          |          | 52   | 51   | 52.0000    | 66.9021   |                                                               |                         |    |    |   |   |   |   |
| FN0541  |                        |                      |          |          |      | 6    |            | 7.2882    | AAL94737.1  polysaccharide deacetylase                        |                         |    |    |   |   |   |   |
|         |                        |                      |          |          |      | 15   |            | 19.6771   |                                                               |                         |    |    |   |   |   |   |
| FN0542  | 0.849                  | 8.771                | 1.668e-1 | 4.372e-1 | 3    | 17   | 4.1104     | 20.6500   | AAL94738.1  Beta 1,4 glucosyltransferase                      |                         |    |    |   |   |   |   |
|         |                        |                      |          |          | 52   | 8    | 52.0000    | 10.4944   |                                                               |                         |    |    |   |   |   |   |
| FN0543  | -1.094                 | 10.321               | 2.493e-2 | 3.574e-2 | 8    | 45   | 10.9611    | 54.6618   | AAL94739.1  Lipopolysaccharide heptosyltransferase-1          |                         |    |    |   |   |   |   |
|         |                        |                      |          |          | 38   | 38   | 38.0000    | 49.8486   |                                                               |                         |    |    |   |   |   |   |
| FN0544  |                        |                      |          |          |      |      |            |           | AAL94740.1  ADP-heptose:LPS heptosyltransferase II            |                         |    |    |   |   |   |   |
|         |                        |                      |          |          | 3    |      | 3.0000     |           |                                                               |                         |    |    |   |   |   |   |
| FN0546  | -0.281                 | 5.451                |          |          |      | 6    |            | 7.2882    | AAL94742.1  Lipopolysaccharide core biosynthesis protein rfaQ |                         |    |    |   |   |   |   |
|         |                        |                      |          |          | 6    |      | 6.0000     |           |                                                               |                         |    |    |   |   |   |   |
| FN0547  | -1.334                 | 16.732               | 7.476e-3 | 7.902e-3 | 88   | 425  | 120.5723   | 516.2501  | AAL94743.1  RecA protein                                      |                         |    |    |   |   |   |   |
|         |                        |                      |          |          | 295  | 405  | 295.0000   | 531.2811  |                                                               |                         |    |    |   |   |   |   |
| FN0549  |                        |                      |          |          |      |      |            |           | AAL94745.1  O-sialoglycoprotein endopeptidase                 |                         |    |    |   |   |   |   |
|         |                        |                      |          |          |      | 3    |            | 3.9354    |                                                               |                         |    |    |   |   |   |   |
| FN0550  |                        |                      |          |          | 34   |      | 46.5848    |           | AAL94746.1  hypothetical Protein                              |                         |    |    |   |   |   |   |
|         |                        |                      |          |          | 16   |      | 16.0000    |           |                                                               |                         |    |    |   |   |   |   |
| FN0552  | 0.538                  | 8.751                | 4.343e-2 | 7.384e-2 | 19   | 10   | 26.0327    | 12.1471   | AAL94748.1  Serine racemase                                   |                         |    |    |   |   |   |   |
|         |                        |                      |          |          | 24   | 17   | 24.0000    | 22.3007   |                                                               |                         |    |    |   |   |   |   |
| FN0553  | 0.711                  | 13.762               | 9.265e-2 | 2.057e-1 | 64   | 75   | 87.6890    | 91.1030   | AAL94749.1  D-serine dehydratase                              |                         |    |    |   |   |   |   |
|         |                        |                      |          |          | 214  | 71   | 214.0000   | 93.1382   |                                                               |                         |    |    |   |   |   |   |
| FN0554  | 1.694                  | 6.477                |          |          | 8    |      | 10.9611    |           | AAL94750.1  D-serine permease                                 |                         |    |    |   |   |   |   |
|         |                        |                      |          |          | 23   | 4    | 23.0000    | 5.2472    |                                                               |                         |    |    |   |   |   |   |
| FN0556  | -0.194                 | 12.234               | 2.387e-1 | 6.989e-1 | 75   | 65   | 102.7605   | 78.9559   | AAL94752.1  unknown                                           |                         |    |    |   |   |   |   |
|         |                        |                      |          |          | 27   | 53   | 27.0000    | 69.5257   |                                                               |                         |    |    |   |   |   |   |

Show detected proteins only  
 Show all proteins  
 Filter by category:

Proteins found: 1338

Enter (or paste) list of ORFs

Find ORFs

Test Cutoff

q-Value

p-Value

.005

| Signif | Direction | Applies To   |
|--------|-----------|--------------|
| yes    | +         | ratios, bars |
| no     | n/a       | bars         |
| yes    | -         | ratios, bars |
| yes    | +         | p-, q-Values |
| yes    | -         | p-, q-Values |

Dot Plots Dot Plots

Fn Summary Table FnPg vs Fn FnSg vs Fn FnPgSg vs Fn FnPgSg vs FnPg FnSg vs FnPg FnPgSg vs FnSg Fn Coverage

| Protein | FnPg vs Fn             |                      |          |          | Raw  |     | Normalized |          | Description                                                                         | Log <sub>2</sub> Ratios |    |    |   |   |   |   |
|---------|------------------------|----------------------|----------|----------|------|-----|------------|----------|-------------------------------------------------------------------------------------|-------------------------|----|----|---|---|---|---|
|         | Log <sub>2</sub> Ratio | Log <sub>2</sub> Sum | q-Value  | p-Value  | FnPg | Fn  | FnPg       | Fn       |                                                                                     | -6                      | -4 | -2 | 0 | 2 | 4 | 6 |
| FN0557  | 1.582                  | 12.845               | 4.794e-2 | 8.458e-2 | 59   | 46  | 80.8383    | 55.8765  | AAL94753.1  unknown                                                                 |                         |    |    |   |   |   |   |
|         |                        |                      |          |          | 216  | 33  | 216.0000   | 43.2896  |                                                                                     |                         |    |    |   |   |   |   |
| FN0558  | 2.171                  | 14.188               |          |          |      | 52  |            | 63.1647  | AAL94754.1  TraT complement resistance protein precursor                            |                         |    |    |   |   |   |   |
|         |                        |                      |          |          | 290  | 50  | 290.0000   | 65.5903  |                                                                                     |                         |    |    |   |   |   |   |
| FN0559  | 0.991                  | 14.564               | 4.928e-2 | 8.779e-2 | 105  | 90  | 143.8647   | 109.3236 | AAL94755.1  Phosphoglucomutase                                                      |                         |    |    |   |   |   |   |
|         |                        |                      |          |          | 295  | 85  | 295.0000   | 111.5034 |                                                                                     |                         |    |    |   |   |   |   |
| FN0561  | -0.125                 | 11.120               | 1.507e-1 | 3.821e-1 | 28   | 39  | 38.3639    | 47.3735  | AAL94757.1  Proline synthetase associated protein                                   |                         |    |    |   |   |   |   |
|         |                        |                      |          |          | 52   | 39  | 52.0000    | 51.1604  |                                                                                     |                         |    |    |   |   |   |   |
| FN0562  | -0.332                 | 13.764               | 6.792e-2 | 1.372e-1 | 60   | 98  | 82.2084    | 119.0412 | AAL94758.1  Hypothetical cytosolic protein                                          |                         |    |    |   |   |   |   |
|         |                        |                      |          |          | 128  | 111 | 128.0000   | 145.6104 |                                                                                     |                         |    |    |   |   |   |   |
| FN0563  | -1.631                 | 7.755                | 9.49e-3  | 1.066e-2 | 10   | 21  | 13.7014    | 25.5088  | AAL94759.1  putative tRNA (5-methylaminomethyl-2-thiouridylate) - methyltransferase |                         |    |    |   |   |   |   |
|         |                        |                      |          |          | 3    | 20  | 3.0000     | 26.2361  |                                                                                     |                         |    |    |   |   |   |   |
| FN0574  |                        |                      |          |          |      | 3   |            | 3.6441   | AAL94770.1  Hypothetical cytosolic protein                                          |                         |    |    |   |   |   |   |
|         |                        |                      |          |          |      |     |            |          |                                                                                     |                         |    |    |   |   |   |   |
| FN0576  | -0.794                 | 11.518               | 4.822e-3 | 4.344e-3 | 25   | 58  | 34.2535    | 70.4530  | AAL94772.1  hypothetical protein                                                    |                         |    |    |   |   |   |   |
|         |                        |                      |          |          | 48   | 55  | 48.0000    | 72.1493  |                                                                                     |                         |    |    |   |   |   |   |
| FN0577  | 1.068                  | 5.851                |          |          |      |     |            |          | AAL94773.1  Hypothetical protein                                                    |                         |    |    |   |   |   |   |
|         |                        |                      |          |          | 11   | 4   | 11.0000    | 5.2472   |                                                                                     |                         |    |    |   |   |   |   |
| FN0579  | 1.502                  | 18.883               | 2.34e-2  | 3.3e-2   | 1109 | 341 | 1519.4851  | 414.2148 | AAL94775.1  Hypothetical cytosolic protein                                          |                         |    |    |   |   |   |   |
|         |                        |                      |          |          | 821  | 314 | 821.0000   | 411.9069 |                                                                                     |                         |    |    |   |   |   |   |
| FN0580  | -2.833                 | 6.833                |          |          |      | 21  |            | 25.5088  | AAL94776.1  Penicillin-binding protein                                              |                         |    |    |   |   |   |   |
|         |                        |                      |          |          | 4    | 24  | 4.0000     | 31.4833  |                                                                                     |                         |    |    |   |   |   |   |
| FN0581  | -1.229                 | 7.229                |          |          |      | 19  |            | 23.0794  | AAL94777.1  Lipoprotein releasing system transmembrane protein lolE                 |                         |    |    |   |   |   |   |
|         |                        |                      |          |          | 8    | 11  | 8.0000     | 14.4299  |                                                                                     |                         |    |    |   |   |   |   |
| FN0582  | -1.440                 | 9.780                |          |          |      | 34  |            | 41.3000  | AAL94778.1  Lipoprotein releasing system ATP-binding protein lolD                   |                         |    |    |   |   |   |   |
|         |                        |                      |          |          | 18   | 43  | 18.0000    | 56.4076  |                                                                                     |                         |    |    |   |   |   |   |
| FN0583  | 1.304                  | 7.480                |          |          |      | 7   |            | 8.5029   | AAL94779.1  Hypothetical Exported Protein                                           |                         |    |    |   |   |   |   |
|         |                        |                      |          |          | 21   |     | 21.0000    |          |                                                                                     |                         |    |    |   |   |   |   |
| FN0585  | 0.893                  | 7.198                | 1.115e-1 | 2.601e-1 | 19   | 6   | 26.0327    | 7.2882   | AAL94781.1  Two-component response regulator czcR                                   |                         |    |    |   |   |   |   |
|         |                        |                      |          |          | 7    | 8   | 7.0000     | 10.4944  |                                                                                     |                         |    |    |   |   |   |   |
| FN0586  | 0.879                  | 6.522                |          |          |      | 3   |            | 3.6441   | AAL94782.1  Two-component sensor kinase czcS                                        |                         |    |    |   |   |   |   |
|         |                        |                      |          |          | 13   | 8   | 13.0000    | 10.4944  |                                                                                     |                         |    |    |   |   |   |   |

Show detected proteins only  
 Show all proteins  
 Filter by category:

Proteins found: 1338

Enter (or paste) list of ORFs

Find ORFs

Test Cutoff

q-Value .005

p-Value

| Signif | Direction | Applies To   |
|--------|-----------|--------------|
| yes    | +         | ratios, bars |
| no     | n/a       | bars         |
| yes    | -         | ratios, bars |
| yes    | +         | p-, q-Values |
| yes    | -         |              |

Dot Plots Dot Plots

Fn Summary Table FnPg vs Fn FnSg vs Fn FnPgSg vs Fn FnPgSg vs FnPg FnSg vs FnPg FnPgSg vs FnSg Fn Coverage

| Protein | FnPg vs Fn             |                      |          |          | Raw  |     | Normalized |          | Description                                                                       | Log <sub>2</sub> Ratios |    |    |   |   |   |   |
|---------|------------------------|----------------------|----------|----------|------|-----|------------|----------|-----------------------------------------------------------------------------------|-------------------------|----|----|---|---|---|---|
|         | Log <sub>2</sub> Ratio | Log <sub>2</sub> Sum | q-Value  | p-Value  | FnPg | Fn  | FnPg       | Fn       |                                                                                   | -6                      | -4 | -2 | 0 | 2 | 4 | 6 |
| FN0590  | 0.905                  | 8.602                | 1.142e-1 | 2.679e-1 | 8    | 14  | 10.9611    | 17.0059  | AAL94786.1  N-acyl-L-amino acid amidohydrolase                                    |                         |    |    |   |   |   |   |
|         |                        |                      |          |          | 43   | 9   | 43.0000    | 11.8062  |                                                                                   |                         |    |    |   |   |   |   |
| FN0592  | -0.593                 | 12.849               | 8.665e-4 | 3.742e-4 | 51   | 84  | 69.8771    | 102.0353 | AAL94788.1  ATP-dependent DNA helicase pcrA                                       |                         |    |    |   |   |   |   |
|         |                        |                      |          |          | 70   | 83  | 70.0000    | 108.8798 |                                                                                   |                         |    |    |   |   |   |   |
| FN0593  | -0.011                 | 11.085               | 2.828e-1 | 8.792e-1 | 32   | 36  | 43.8445    | 43.7294  | AAL94789.1  UDP-3-O-[3-hydroxymyristoyl] N-acetylglucosamine deacetylase          |                         |    |    |   |   |   |   |
|         |                        |                      |          |          | 49   | 38  | 49.0000    | 49.8486  |                                                                                   |                         |    |    |   |   |   |   |
| FN0594  | 4.420                  | 10.596               |          |          |      | 7   |            | 8.5029   | AAL94790.1  (3R)-hydroxymyristoyl-[acyl carrier protein] dehydratase              |                         |    |    |   |   |   |   |
|         |                        |                      |          |          | 182  |     | 182.0000   |          |                                                                                   |                         |    |    |   |   |   |   |
| FN0595  | 0.421                  | 9.089                |          |          |      | 17  |            | 20.6500  | AAL94791.1  Acyl-[acyl-carrier-protein]-UDP-N-acetylglucosamine O-acyltransferase |                         |    |    |   |   |   |   |
|         |                        |                      |          |          | 27   | 15  | 27.0000    | 19.6771  |                                                                                   |                         |    |    |   |   |   |   |
| FN0596  | -0.887                 | 9.143                | 1.623e-2 | 2.057e-2 | 8    | 23  | 10.9611    | 27.9382  | AAL94792.1  Hypothetical protein                                                  |                         |    |    |   |   |   |   |
|         |                        |                      |          |          | 24   | 28  | 24.0000    | 36.7305  |                                                                                   |                         |    |    |   |   |   |   |
| FN0597  | -0.057                 | 10.396               | 2.393e-1 | 7.015e-1 | 27   | 26  | 36.9938    | 31.5824  | AAL94793.1  Lipid-A-disaccharide synthase                                         |                         |    |    |   |   |   |   |
|         |                        |                      |          |          | 35   | 33  | 35.0000    | 43.2896  |                                                                                   |                         |    |    |   |   |   |   |
| FN0598  | -1.214                 | 8.786                | 2.897e-3 | 2.133e-3 | 7    | 30  | 9.5910     | 36.4412  | AAL94794.1  Phospholipid-lipopolysaccharide ABC transporter                       |                         |    |    |   |   |   |   |
|         |                        |                      |          |          | 18   | 21  | 18.0000    | 27.5479  |                                                                                   |                         |    |    |   |   |   |   |
| FN0600  | -0.134                 | 12.447               | 2.673e-1 | 8.134e-1 | 18   | 63  | 24.6625    | 76.5265  | AAL94796.1  Hypothetical protein                                                  |                         |    |    |   |   |   |   |
|         |                        |                      |          |          | 118  | 61  | 118.0000   | 80.0201  |                                                                                   |                         |    |    |   |   |   |   |
| FN0601  |                        |                      |          |          |      | 31  |            | 37.6559  | AAL94797.1  Hypothetical exported 24-amino acid repeat protein                    |                         |    |    |   |   |   |   |
|         |                        |                      |          |          |      | 27  |            | 35.4187  |                                                                                   |                         |    |    |   |   |   |   |
| FN0602  | -0.450                 | 14.400               | 1.856e-2 | 2.459e-2 | 107  | 148 | 146.6050   | 179.7765 | AAL94798.1  Hypothetical protein                                                  |                         |    |    |   |   |   |   |
|         |                        |                      |          |          | 105  | 125 | 105.0000   | 163.9757 |                                                                                   |                         |    |    |   |   |   |   |
| FN0603  | 0.608                  | 5.392                |          |          |      |     |            |          | AAL94799.1  Transcriptional regulatory protein, LYSR family                       |                         |    |    |   |   |   |   |
|         |                        |                      |          |          | 8    | 4   | 8.0000     | 5.2472   |                                                                                   |                         |    |    |   |   |   |   |
| FN0608  | 1.321                  | 12.367               | 3.34e-2  | 5.204e-2 | 56   | 39  | 76.7278    | 47.3735  | AAL94804.1  Exoribonuclease II                                                    |                         |    |    |   |   |   |   |
|         |                        |                      |          |          | 153  | 34  | 153.0000   | 44.6014  |                                                                                   |                         |    |    |   |   |   |   |
| FN0609  |                        |                      |          |          |      |     |            |          | AAL94805.1  Small protein B                                                       |                         |    |    |   |   |   |   |
|         |                        |                      |          |          | 6    |     | 6.0000     |          |                                                                                   |                         |    |    |   |   |   |   |
| FN0610  | -0.386                 | 15.997               | 1.266e-1 | 3.055e-1 | 93   | 248 | 127.4230   | 301.2471 | AAL94806.1  unknown                                                               |                         |    |    |   |   |   |   |
|         |                        |                      |          |          | 320  | 216 | 320.0000   | 283.3499 |                                                                                   |                         |    |    |   |   |   |   |
| FN0611  | 0.008                  | 18.655               | 2.588e-1 | 7.784e-1 | 461  | 541 | 631.6345   | 657.1561 | AAL94807.1  Threonyl-tRNA synthetase                                              |                         |    |    |   |   |   |   |
|         |                        |                      |          |          | 657  | 476 | 657.0000   | 624.4193 |                                                                                   |                         |    |    |   |   |   |   |

Show detected proteins only  
 Show all proteins  
 Filter by category:

Proteins found: 1338

Test Cutoff

| Signif | Direction | Applies To   |
|--------|-----------|--------------|
| yes    | +         | ratios, bars |
| no     | n/a       | bars         |
| yes    | -         | ratios, bars |
| yes    | +         | p-, q-Values |
| yes    | -         |              |



Fn Summary Table

FnPg vs Fn

FnSg vs Fn

FnPgSg vs Fn

FnPgSg vs FnPg

FnSg vs FnPg

FnPgSg vs FnSg

Fn Coverage

| Protein | FnPg vs Fn             |                      |          |          | Raw  |     | Normalized |          | Description                                                                  | Log <sub>2</sub> Ratios |    |    |   |   |   |   |
|---------|------------------------|----------------------|----------|----------|------|-----|------------|----------|------------------------------------------------------------------------------|-------------------------|----|----|---|---|---|---|
|         | Log <sub>2</sub> Ratio | Log <sub>2</sub> Sum | q-Value  | p-Value  | FnPg | Fn  | FnPg       | Fn       |                                                                              | -6                      | -4 | -2 | 0 | 2 | 4 | 6 |
| FN0612  | -1.943                 | 12.544               | 1.296e-3 | 7.08e-4  | 13   | 107 | 17.8118    | 129.9736 | AAL94808.1  Hypothetical protein                                             |                         |    |    |   |   |   |   |
|         |                        |                      |          |          | 61   | 132 | 61.0000    | 173.1583 |                                                                              |                         |    |    |   |   |   |   |
| FN0615  |                        |                      |          |          | 3    |     | 4.1104     |          | AAL94811.1  Export ABC transporter                                           |                         |    |    |   |   |   |   |
|         |                        |                      |          |          |      |     |            |          |                                                                              |                         |    |    |   |   |   |   |
| FN0616  | -3.077                 | 8.692                |          |          |      | 53  |            | 64.3794  | AAL94812.1  Hypothetical protein                                             |                         |    |    |   |   |   |   |
|         |                        |                      |          |          | 7    | 41  | 7.0000     | 53.7840  |                                                                              |                         |    |    |   |   |   |   |
| FN0617  | 0.513                  | 16.384               | 1.465e-1 | 3.681e-1 | 380  | 200 | 520.6531   | 242.9412 | AAL94813.1  DNA polymerase III, beta chain                                   |                         |    |    |   |   |   |   |
|         |                        |                      |          |          | 178  | 188 | 178.0000   | 246.6194 |                                                                              |                         |    |    |   |   |   |   |
| FN0618  | -0.465                 | 14.090               | 1.212e-1 | 2.89e-1  | 40   | 128 | 54.8056    | 155.4824 | AAL94814.1  Spermidine/putrescine-binding protein                            |                         |    |    |   |   |   |   |
|         |                        |                      |          |          | 170  | 118 | 170.0000   | 154.7930 |                                                                              |                         |    |    |   |   |   |   |
| FN0619  | -1.035                 | 8.489                | 3.386e-2 | 5.301e-2 | 4    | 22  | 5.4806     | 26.7235  | AAL94815.1  Small-conductance mechanosensitive channel                       |                         |    |    |   |   |   |   |
|         |                        |                      |          |          | 21   | 21  | 21.0000    | 27.5479  |                                                                              |                         |    |    |   |   |   |   |
| FN0621  | -0.074                 | 11.610               | 2.679e-1 | 8.158e-1 | 54   | 48  | 73.9876    | 58.3059  | AAL94817.1  4-hydroxybutyrate coenzyme A transferase                         |                         |    |    |   |   |   |   |
|         |                        |                      |          |          | 35   | 43  | 35.0000    | 56.4076  |                                                                              |                         |    |    |   |   |   |   |
| FN0622  | 2.520                  | 7.838                | 4.561e-2 | 7.908e-2 | 12   | 5   | 16.4417    | 6.0735   | AAL94818.1  8-oxoguanine DNA glycosylase                                     |                         |    |    |   |   |   |   |
|         |                        |                      |          |          | 56   | 5   | 56.0000    | 6.5590   |                                                                              |                         |    |    |   |   |   |   |
| FN0625  | -0.443                 | 9.165                |          |          | 15   | 19  | 20.5521    | 23.0794  | AAL94821.1  Aspartate aminotransferase                                       |                         |    |    |   |   |   |   |
|         |                        |                      |          |          |      | 25  |            | 32.7951  |                                                                              |                         |    |    |   |   |   |   |
| FN0627  | -1.099                 | 14.249               | 1.614e-2 | 2.042e-2 | 37   | 158 | 50.6952    | 191.9236 | AAL94823.1  Glucosamine--fructose-6-phosphate aminotransferase (isomerizing) |                         |    |    |   |   |   |   |
|         |                        |                      |          |          | 140  | 165 | 140.0000   | 216.4479 |                                                                              |                         |    |    |   |   |   |   |
| FN0628  |                        |                      |          |          |      | 3   |            | 3.6441   | AAL94824.1  Glucosamine--fructose-6-phosphate aminotransferase (isomerizing) |                         |    |    |   |   |   |   |
|         |                        |                      |          |          |      | 7   |            | 9.1826   |                                                                              |                         |    |    |   |   |   |   |
| FN0629  | -0.251                 | 8.251                |          |          |      | 13  |            | 15.7912  | AAL94825.1  PTS system, IID component                                        |                         |    |    |   |   |   |   |
|         |                        |                      |          |          | 16   | 17  | 16.0000    | 22.3007  |                                                                              |                         |    |    |   |   |   |   |
| FN0630  |                        |                      |          |          |      |     |            |          | AAL94826.1  PTS system, IIC component                                        |                         |    |    |   |   |   |   |
|         |                        |                      |          |          |      | 11  |            | 14.4299  |                                                                              |                         |    |    |   |   |   |   |
| FN0631  | -0.334                 | 8.509                |          |          |      | 18  |            | 21.8647  | AAL94827.1  PTS system, IIB component                                        |                         |    |    |   |   |   |   |
|         |                        |                      |          |          | 17   | 16  | 17.0000    | 20.9889  |                                                                              |                         |    |    |   |   |   |   |
| FN0633  | 0.570                  | 7.244                |          |          |      | 8   |            | 9.7176   | AAL94829.1  Replication protein                                              |                         |    |    |   |   |   |   |
|         |                        |                      |          |          | 15   | 8   | 15.0000    | 10.4944  |                                                                              |                         |    |    |   |   |   |   |
| FN0634  | -0.481                 | 14.010               | 1.474e-1 | 3.711e-1 | 131  | 117 | 179.4883   | 142.1206 | AAL94830.1  GTP-binding protein TypA/BipA                                    |                         |    |    |   |   |   |   |
|         |                        |                      |          |          | 38   | 123 | 38.0000    | 161.3520 |                                                                              |                         |    |    |   |   |   |   |

Show detected proteins only  
 Show all proteins  
 Filter by category:

Proteins found: 1338

Enter (or paste) list of ORFs

Find ORFs

Test Cutoff

q-Value

p-Value

.005

| Signif | Direction | Applies To   |
|--------|-----------|--------------|
| yes    | +         | ratios, bars |
| no     | n/a       | bars         |
| yes    | -         | ratios, bars |
| yes    | +         | p-, q-Values |
| yes    | -         | p-, q-Values |

Dot Plots

Fn Summary Table FnPg vs Fn FnSg vs Fn FnPgSg vs Fn FnPgSg vs FnPg FnSg vs FnPg FnPgSg vs FnSg Fn Coverage

| Protein       | FnPg vs Fn             |                      |          |          | Raw  |      | Normalized |           | Description                                                    | Log <sub>2</sub> Ratios |    |    |   |   |   |   |
|---------------|------------------------|----------------------|----------|----------|------|------|------------|-----------|----------------------------------------------------------------|-------------------------|----|----|---|---|---|---|
|               | Log <sub>2</sub> Ratio | Log <sub>2</sub> Sum | q-Value  | p-Value  | FnPg | Fn   | FnPg       | Fn        |                                                                | -6                      | -4 | -2 | 0 | 2 | 4 | 6 |
| <b>FN0636</b> |                        |                      |          |          |      | 6    |            | 7.2882    | AAL94832.1  Hypothetical protein                               |                         |    |    |   |   |   |   |
| <b>FN0637</b> |                        |                      |          |          |      | 6    |            | 7.2882    | AAL94833.1  Hypothetical exported 24-amino acid repeat protein |                         |    |    |   |   |   |   |
|               |                        |                      |          |          |      | 7    |            | 9.1826    |                                                                |                         |    |    |   |   |   |   |
| <b>FN0643</b> | 0.764                  | 9.037                | 6.087e-2 | 1.184e-1 | 29   | 16   | 39.7341    | 19.4353   | AAL94839.1  hypothetical DNA-binding protein                   |                         |    |    |   |   |   |   |
|               |                        |                      |          |          | 20   | 12   | 20.0000    | 15.7417   |                                                                |                         |    |    |   |   |   |   |
| <b>FN0644</b> | -0.006                 | 11.352               | 2.955e-1 | 9.351e-1 | 38   | 39   | 52.0653    | 47.3735   | AAL94840.1  Uroporphyrin-III C-methyltransferase               |                         |    |    |   |   |   |   |
|               |                        |                      |          |          | 50   | 42   | 50.0000    | 55.0958   |                                                                |                         |    |    |   |   |   |   |
| <b>FN0645</b> | -0.441                 | 6.247                | 1.22e-1  | 2.915e-1 | 8    | 7    | 10.9611    | 8.5029    | AAL94841.1  Porphobilinogen deaminase                          |                         |    |    |   |   |   |   |
|               |                        |                      |          |          | 4    | 9    | 4.0000     | 11.8062   |                                                                |                         |    |    |   |   |   |   |
| <b>FN0649</b> |                        |                      |          |          | 6    |      | 8.2208     |           | AAL94845.1  Exoenzymes regulatory protein aepA precursor       |                         |    |    |   |   |   |   |
| <b>FN0652</b> | 1.042                  | 23.635               | 5.399e-2 | 9.959e-2 | 2352 | 2050 | 3222.5689  | 2490.1477 | AAL94848.1  Glyceraldehyde 3-phosphate dehydrogenase           |                         |    |    |   |   |   |   |
|               |                        |                      |          |          | 7137 | 1937 | 7137.0000  | 2540.9668 |                                                                |                         |    |    |   |   |   |   |
| <b>FN0653</b> | 0.280                  | 11.739               | 1.59e-1  | 4.101e-1 | 32   | 42   | 43.8445    | 51.0177   | AAL94849.1  unknown                                            |                         |    |    |   |   |   |   |
|               |                        |                      |          |          | 85   | 42   | 85.0000    | 55.0958   |                                                                |                         |    |    |   |   |   |   |
| <b>FN0654</b> | -0.077                 | 18.744               | 2.383e-1 | 6.975e-1 | 368  | 532  | 504.2115   | 646.2237  | AAL94850.1  Phosphoglycerate kinase                            |                         |    |    |   |   |   |   |
|               |                        |                      |          |          | 786  | 545  | 786.0000   | 714.9339  |                                                                |                         |    |    |   |   |   |   |
| <b>FN0655</b> | -2.886                 | 9.805                |          |          |      | 54   |            | 65.5941   | AAL94851.1  unknown                                            |                         |    |    |   |   |   |   |
|               |                        |                      |          |          | 11   | 74   | 11.0000    | 97.0736   |                                                                |                         |    |    |   |   |   |   |
| <b>FN0656</b> |                        |                      |          |          |      | 64   |            | 77.7412   | AAL94852.1  Hypothetical protein                               |                         |    |    |   |   |   |   |
|               |                        |                      |          |          |      | 76   |            | 99.6972   |                                                                |                         |    |    |   |   |   |   |
| <b>FN0657</b> | 1.009                  | 7.910                |          |          |      | 9    |            | 10.9324   | AAL94853.1  Acetyltransferase                                  |                         |    |    |   |   |   |   |
|               |                        |                      |          |          | 22   |      | 22.0000    |           |                                                                |                         |    |    |   |   |   |   |
| <b>FN0658</b> | -1.362                 | 13.326               | 3.023e-4 | 7.136e-5 | 47   | 139  | 64.3966    | 168.8442  | AAL94854.1  ABC transporter substrate-binding protein          |                         |    |    |   |   |   |   |
|               |                        |                      |          |          | 62   | 119  | 62.0000    | 156.1048  |                                                                |                         |    |    |   |   |   |   |
| <b>FN0660</b> | -0.313                 | 7.005                | 6.954e-2 | 1.414e-1 | 9    | 10   | 12.3313    | 12.1471   | AAL94856.1  ABC transporter ATP-binding protein                |                         |    |    |   |   |   |   |
|               |                        |                      |          |          | 8    | 10   | 8.0000     | 13.1181   |                                                                |                         |    |    |   |   |   |   |
| <b>FN0662</b> | 0.384                  | 11.041               | 2.322e-1 | 6.744e-1 | 5    | 37   | 6.8507     | 44.9441   | AAL94858.1  Formiminoglutamase                                 |                         |    |    |   |   |   |   |
|               |                        |                      |          |          | 98   | 27   | 98.0000    | 35.4187   |                                                                |                         |    |    |   |   |   |   |
| <b>FN0664</b> | -1.329                 | 13.462               | 7.1e-3   | 7.367e-3 | 73   | 126  | 100.0202   | 153.0530  | AAL94860.1  2-nitropropane dioxygenase                         |                         |    |    |   |   |   |   |
|               |                        |                      |          |          | 34   | 140  | 34.0000    | 183.6527  |                                                                |                         |    |    |   |   |   |   |

Show detected proteins only  
 Show all proteins  
 Filter by category:

Proteins found: 1338

Enter (or paste) list of ORFs

Find ORFs

Test Cutoff

q-Value

p-Value

.005

| Signif | Direction | Applies To   |
|--------|-----------|--------------|
| yes    | +         | ratios, bars |
| no     | n/a       | bars         |
| yes    | -         | ratios, bars |
| yes    | +         | p-, q-Values |
| yes    | -         | p-, q-Values |

Dot Plots Dot Plots

Fn Summary Table FnPg vs Fn FnSg vs Fn FnPgSg vs Fn FnPgSg vs FnPg FnSg vs FnPg FnPgSg vs FnSg Fn Coverage

| Protein | FnPg vs Fn             |                      |          |          | Raw  |     | Normalized |           | Description                                                         | Log <sub>2</sub> Ratios |    |    |   |   |   |   |
|---------|------------------------|----------------------|----------|----------|------|-----|------------|-----------|---------------------------------------------------------------------|-------------------------|----|----|---|---|---|---|
|         | Log <sub>2</sub> Ratio | Log <sub>2</sub> Sum | q-Value  | p-Value  | FnPg | Fn  | FnPg       | Fn        |                                                                     | -6                      | -4 | -2 | 0 | 2 | 4 | 6 |
| FN0666  |                        |                      |          |          |      | 9   |            | 10.9324   | AAL94862.1  Hypothetical protein                                    |                         |    |    |   |   |   |   |
|         |                        |                      |          |          |      | 10  |            | 13.1181   |                                                                     |                         |    |    |   |   |   |   |
| FN0668  | -0.885                 | 9.350                | 3.602e-2 | 5.742e-2 | 7    | 28  | 9.5910     | 34.0118   | AAL94864.1  High-affinity zinc uptake system protein znuA precursor |                         |    |    |   |   |   |   |
|         |                        |                      |          |          | 28   | 27  | 28.0000    | 35.4187   |                                                                     |                         |    |    |   |   |   |   |
| FN0672  |                        |                      |          |          |      |     |            |           | AAL94868.1  ATPase                                                  |                         |    |    |   |   |   |   |
|         |                        |                      |          |          | 8    |     | 8.0000     |           |                                                                     |                         |    |    |   |   |   |   |
| FN0675  | 0.293                  | 20.681               | 2.319e-1 | 6.732e-1 | 331  | 936 | 453.5163   | 1136.9650 | AAL94871.1  60 kDa chaperonin GROEL                                 |                         |    |    |   |   |   |   |
|         |                        |                      |          |          | 2417 | 919 | 2417.0000  | 1205.5490 |                                                                     |                         |    |    |   |   |   |   |
| FN0676  | -2.238                 | 13.222               |          |          |      | 193 |            | 234.4383  | AAL94872.1  10 kDa chaperonin GROES                                 |                         |    |    |   |   |   |   |
|         |                        |                      |          |          | 45   | 145 | 45.0000    | 190.2118  |                                                                     |                         |    |    |   |   |   |   |
| FN0677  | -0.452                 | 12.428               | 7.458e-2 | 1.549e-1 | 62   | 76  | 84.9487    | 92.3177   | AAL94873.1  Hypothetical protein                                    |                         |    |    |   |   |   |   |
|         |                        |                      |          |          | 42   | 62  | 42.0000    | 81.3319   |                                                                     |                         |    |    |   |   |   |   |
| FN0678  | -2.001                 | 10.975               | 3.84e-3  | 3.143e-3 | 5    | 70  | 6.8507     | 85.0294   | AAL94874.1  Ser/Thr protein kinase                                  |                         |    |    |   |   |   |   |
|         |                        |                      |          |          | 38   | 72  | 38.0000    | 94.4500   |                                                                     |                         |    |    |   |   |   |   |
| FN0679  | -0.047                 | 8.116                | 2.976e-1 | 9.447e-1 | 21   | 16  | 28.7729    | 19.4353   | AAL94875.1  GTPase                                                  |                         |    |    |   |   |   |   |
|         |                        |                      |          |          | 4    | 11  | 4.0000     | 14.4299   |                                                                     |                         |    |    |   |   |   |   |
| FN0680  |                        |                      |          |          |      |     |            |           | AAL94876.1  Ribulose-phosphate 3-epimerase                          |                         |    |    |   |   |   |   |
|         |                        |                      |          |          | 8    |     | 8.0000     |           |                                                                     |                         |    |    |   |   |   |   |
| FN0681  | 0.072                  | 16.439               | 2.266e-1 | 6.533e-1 | 260  | 227 | 356.2364   | 275.7383  | AAL94877.1  Transcriptional regulator, MarR family                  |                         |    |    |   |   |   |   |
|         |                        |                      |          |          | 255  | 233 | 255.0000   | 305.6506  |                                                                     |                         |    |    |   |   |   |   |
| FN0682  | -0.287                 | 8.933                | 1.441e-1 | 3.602e-1 | 19   | 24  | 26.0327    | 29.1529   | AAL94878.1  Fibronectin-binding protein-like protein A              |                         |    |    |   |   |   |   |
|         |                        |                      |          |          | 14   | 15  | 14.0000    | 19.6771   |                                                                     |                         |    |    |   |   |   |   |
| FN0684  |                        |                      |          |          |      |     |            |           | AAL94880.1  Prismane protein                                        |                         |    |    |   |   |   |   |
|         |                        |                      |          |          | 8    |     | 10.9611    |           |                                                                     |                         |    |    |   |   |   |   |
| FN0685  | 1.715                  | 11.795               |          |          |      | 25  |            | 30.3677   | AAL94881.1  Sodium/pantothenate symporter                           |                         |    |    |   |   |   |   |
|         |                        |                      |          |          | 108  | 27  | 108.0000   | 35.4187   |                                                                     |                         |    |    |   |   |   |   |
| FN0688  | -0.814                 | 10.428               |          |          |      | 40  |            | 48.5882   | AAL94884.1  Hypothetical protein                                    |                         |    |    |   |   |   |   |
|         |                        |                      |          |          | 28   | 38  | 28.0000    | 49.8486   |                                                                     |                         |    |    |   |   |   |   |
| FN0689  | -1.400                 | 15.034               | 7.674e-3 | 8.181e-3 | 42   | 234 | 57.5459    | 284.2413  | AAL94885.1  Hypothetical protein                                    |                         |    |    |   |   |   |   |
|         |                        |                      |          |          | 168  | 237 | 168.0000   | 310.8979  |                                                                     |                         |    |    |   |   |   |   |
| FN0692  |                        |                      |          |          |      | 12  |            | 14.5765   | AAL94888.1  Nitrogen regulation protein NIFR3                       |                         |    |    |   |   |   |   |
|         |                        |                      |          |          |      | 18  |            | 23.6125   |                                                                     |                         |    |    |   |   |   |   |

Show detected proteins only  
 Show all proteins  
 Filter by category:

Proteins found: 1338

Test Cutoff

| Signif | Direction | Applies To   |
|--------|-----------|--------------|
| yes    | +         | ratios, bars |
| no     | n/a       | bars         |
| yes    | -         | ratios, bars |
| yes    | +         | p-, q-Values |
| yes    | -         |              |

Fn Summary Table FnPg vs Fn FnSg vs Fn FnPgSg vs Fn FnPgSg vs FnPg FnSg vs FnPg FnPgSg vs FnSg Fn Coverage

| Protein | FnPg vs Fn             |                      |          |          | Raw  |     | Normalized |          | Description                                                  | Log <sub>2</sub> Ratios |    |    |   |   |   |   |
|---------|------------------------|----------------------|----------|----------|------|-----|------------|----------|--------------------------------------------------------------|-------------------------|----|----|---|---|---|---|
|         | Log <sub>2</sub> Ratio | Log <sub>2</sub> Sum | q-Value  | p-Value  | FnPg | Fn  | FnPg       | Fn       |                                                              | -6                      | -4 | -2 | 0 | 2 | 4 | 6 |
| FN0693  | -0.715                 | 9.438                |          |          | 15   | 21  | 20.5521    | 25.5088  | AAL94889.1  DNA mismatch repair protein mutS                 |                         |    |    |   |   |   |   |
|         |                        |                      |          |          |      | 32  |            | 41.9778  |                                                              |                         |    |    |   |   |   |   |
| FN0694  | -1.205                 | 11.775               | 2.013e-3 | 1.303e-3 | 27   | 67  | 36.9938    | 81.3853  | AAL94890.1  S-layer protein                                  |                         |    |    |   |   |   |   |
|         |                        |                      |          |          | 41   | 75  | 41.0000    | 98.3854  |                                                              |                         |    |    |   |   |   |   |
| FN0695  | -0.255                 | 9.735                | 1.841e-1 | 5.011e-1 | 12   | 32  | 16.4417    | 38.8706  | AAL94891.1  ABC transporter ATP-binding protein              |                         |    |    |   |   |   |   |
|         |                        |                      |          |          | 37   | 19  | 37.0000    | 24.9243  |                                                              |                         |    |    |   |   |   |   |
| FN0697  | -0.888                 | 15.023               | 2.426e-3 | 1.676e-3 | 114  | 210 | 156.1959   | 255.0883 | AAL94893.1  Alanyl-tRNA synthetase                           |                         |    |    |   |   |   |   |
|         |                        |                      |          |          | 112  | 184 | 112.0000   | 241.3722 |                                                              |                         |    |    |   |   |   |   |
| FN0699  | -2.041                 | 12.095               | 2.411e-4 | 5.118e-5 | 33   | 101 | 45.2146    | 122.6853 | AAL94895.1  Protein translocase subunit secD                 |                         |    |    |   |   |   |   |
|         |                        |                      |          |          | 20   | 111 | 20.0000    | 145.6104 |                                                              |                         |    |    |   |   |   |   |
| FN0700  | -1.970                 | 10.170               | 8.457e-4 | 3.581e-4 | 17   | 48  | 23.2924    | 58.3059  | AAL94896.1  Protein translocase subunit secF                 |                         |    |    |   |   |   |   |
|         |                        |                      |          |          | 11   | 58  | 11.0000    | 76.0847  |                                                              |                         |    |    |   |   |   |   |
| FN0701  | -0.323                 | 15.171               | 7.1e-4   | 2.664e-4 | 120  | 182 | 164.4168   | 221.0765 | AAL94897.1  Methyltransferase                                |                         |    |    |   |   |   |   |
|         |                        |                      |          |          | 179  | 159 | 179.0000   | 208.5770 |                                                              |                         |    |    |   |   |   |   |
| FN0705  | -0.948                 | 13.356               | 6.438e-3 | 6.416e-3 | 39   | 123 | 53.4355    | 149.4089 | AAL94901.1  DNA polymerase I                                 |                         |    |    |   |   |   |   |
|         |                        |                      |          |          | 94   | 103 | 94.0000    | 135.1159 |                                                              |                         |    |    |   |   |   |   |
| FN0706  |                        |                      |          |          |      | 6   |            | 7.2882   | AAL94902.1  Hypothetical cytosolic protein                   |                         |    |    |   |   |   |   |
|         |                        |                      |          |          |      | 10  |            | 13.1181  |                                                              |                         |    |    |   |   |   |   |
| FN0707  | -0.919                 | 8.340                | 2.628e-2 | 3.818e-2 | 14   | 17  | 19.1820    | 20.6500  | AAL94903.1  Riboflavin kinase                                |                         |    |    |   |   |   |   |
|         |                        |                      |          |          | 7    | 22  | 7.0000     | 28.8597  |                                                              |                         |    |    |   |   |   |   |
| FN0710  | -0.325                 | 11.975               | 3.353e-2 | 5.231e-2 | 47   | 64  | 64.3966    | 77.7412  | AAL94906.1  Hypothetical protein                             |                         |    |    |   |   |   |   |
|         |                        |                      |          |          | 49   | 49  | 49.0000    | 64.2785  |                                                              |                         |    |    |   |   |   |   |
| FN0711  | 0.574                  | 7.601                |          |          |      | 8   |            | 9.7176   | AAL94907.1  Phosphopantothenate--cysteine ligase             |                         |    |    |   |   |   |   |
|         |                        |                      |          |          | 17   | 10  | 17.0000    | 13.1181  |                                                              |                         |    |    |   |   |   |   |
| FN0714  |                        |                      |          |          | 7    |     | 9.5910     |          | AAL94910.1  NADH oxidase                                     |                         |    |    |   |   |   |   |
|         |                        |                      |          |          | 7    |     | 7.0000     |          |                                                              |                         |    |    |   |   |   |   |
| FN0715  | 0.137                  | 14.316               | 2.68e-1  | 8.164e-1 | 177  | 113 | 242.5148   | 137.2618 | AAL94911.1  Hypothetical protein                             |                         |    |    |   |   |   |   |
|         |                        |                      |          |          | 57   | 103 | 57.0000    | 135.1159 |                                                              |                         |    |    |   |   |   |   |
| FN0716  | -0.970                 | 11.302               | 2.889e-2 | 4.303e-2 | 40   | 65  | 54.8056    | 78.9559  | AAL94912.1  hypothetical protein                             |                         |    |    |   |   |   |   |
|         |                        |                      |          |          | 17   | 47  | 17.0000    | 61.6548  |                                                              |                         |    |    |   |   |   |   |
| FN0717  |                        |                      |          |          |      | 6   |            | 7.8708   | AAL94913.1  Ribosomal small subunit pseudouridine synthase A |                         |    |    |   |   |   |   |
|         |                        |                      |          |          |      |     |            |          |                                                              |                         |    |    |   |   |   |   |

Show detected proteins only  
 Show all proteins  
 Filter by category:

Proteins found: 1338

Test Cutoff

| Signif | Direction | Applies To   |
|--------|-----------|--------------|
| yes    | +         | ratios, bars |
| no     | n/a       | bars         |
| yes    | -         | ratios, bars |
| yes    | +         | p-, q-Values |
| yes    | -         |              |

Fn Summary Table FnPg vs Fn FnSg vs Fn FnPgSg vs Fn FnPgSg vs FnPg FnSg vs FnPg FnPgSg vs FnSg Fn Coverage

| Protein | FnPg vs Fn             |                      |          |          | Raw  |     | Normalized |          | Description                                                    | Log <sub>2</sub> Ratios |    |    |   |   |   |   |
|---------|------------------------|----------------------|----------|----------|------|-----|------------|----------|----------------------------------------------------------------|-------------------------|----|----|---|---|---|---|
|         | Log <sub>2</sub> Ratio | Log <sub>2</sub> Sum | q-Value  | p-Value  | FnPg | Fn  | FnPg       | Fn       |                                                                | -6                      | -4 | -2 | 0 | 2 | 4 | 6 |
| FN0719  |                        |                      |          |          |      | 9   |            | 10.9324  | AAL94915.1  Hypothetical cytosolic protein                     |                         |    |    |   |   |   |   |
|         |                        |                      |          |          |      | 8   |            | 10.4944  |                                                                |                         |    |    |   |   |   |   |
| FN0720  | -1.271                 | 13.663               | 1.901e-4 | 3.531e-5 | 45   | 139 | 61.6563    | 168.8442 | AAL94916.1  Protein Translation Elongation Factor P (EF-P)     |                         |    |    |   |   |   |   |
|         |                        |                      |          |          | 85   | 141 | 85.0000    | 184.9645 |                                                                |                         |    |    |   |   |   |   |
| FN0721  | -2.523                 | 10.323               | 1.122e-3 | 5.666e-4 | 5    | 70  | 6.8507     | 85.0294  | AAL94917.1  Hypothetical protein                               |                         |    |    |   |   |   |   |
|         |                        |                      |          |          | 23   | 66  | 23.0000    | 86.5791  |                                                                |                         |    |    |   |   |   |   |
| FN0722  | -0.674                 | 7.275                | 4.278e-2 | 7.23e-2  | 10   | 14  | 13.7014    | 17.0059  | AAL94918.1  WD-repeat family protein                           |                         |    |    |   |   |   |   |
|         |                        |                      |          |          | 6    | 11  | 6.0000     | 14.4299  |                                                                |                         |    |    |   |   |   |   |
| FN0723  |                        |                      |          |          |      |     |            |          | AAL94919.1  Hypothetical protein                               |                         |    |    |   |   |   |   |
|         |                        |                      |          |          | 4    |     | 4.0000     |          |                                                                |                         |    |    |   |   |   |   |
| FN0724  | 0.527                  | 10.961               | 1.99e-3  | 1.28e-3  | 41   | 31  | 56.1757    | 37.6559  | AAL94920.1  Flavodoxin                                         |                         |    |    |   |   |   |   |
|         |                        |                      |          |          | 51   | 28  | 51.0000    | 36.7305  |                                                                |                         |    |    |   |   |   |   |
| FN0725  | 0.639                  | 7.469                | 1.276e-1 | 3.087e-1 | 6    | 10  | 8.2208     | 12.1471  | AAL94921.1  Molybdopterin biosynthesis MoeB protein            |                         |    |    |   |   |   |   |
|         |                        |                      |          |          | 25   | 7   | 25.0000    | 9.1826   |                                                                |                         |    |    |   |   |   |   |
| FN0728  | 0.390                  | 10.411               | 3.142e-3 | 2.396e-3 | 31   | 25  | 42.4743    | 30.3677  | AAL94924.1  Hypothetical protein                               |                         |    |    |   |   |   |   |
|         |                        |                      |          |          | 42   | 26  | 42.0000    | 34.1069  |                                                                |                         |    |    |   |   |   |   |
| FN0729  | -0.595                 | 15.069               | 5.641e-2 | 1.06e-1  | 153  | 197 | 209.6314   | 239.2971 | AAL94925.1  Phosphoglycerate mutase                            |                         |    |    |   |   |   |   |
|         |                        |                      |          |          | 92   | 165 | 92.0000    | 216.4479 |                                                                |                         |    |    |   |   |   |   |
| FN0731  | 0.969                  | 9.971                | 6.08e-2  | 1.182e-1 | 45   | 20  | 61.6563    | 24.2941  | AAL94927.1  Hypothetical protein                               |                         |    |    |   |   |   |   |
|         |                        |                      |          |          | 27   | 16  | 27.0000    | 20.9889  |                                                                |                         |    |    |   |   |   |   |
| FN0733  | -0.641                 | 13.087               | 1.256e-2 | 1.49e-2  | 66   | 100 | 90.4292    | 121.4706 | AAL94929.1  Peptidase T                                        |                         |    |    |   |   |   |   |
|         |                        |                      |          |          | 59   | 85  | 59.0000    | 111.5034 |                                                                |                         |    |    |   |   |   |   |
| FN0734  |                        |                      |          |          |      | 9   |            | 10.9324  | AAL94930.1  Fe-S oxidoreductase                                |                         |    |    |   |   |   |   |
|         |                        |                      |          |          |      | 9   |            | 11.8062  |                                                                |                         |    |    |   |   |   |   |
| FN0735  | 0.018                  | 13.715               | 3.04e-1  | 9.736e-1 | 136  | 99  | 186.3390   | 120.2559 | AAL94931.1  Cell surface protein                               |                         |    |    |   |   |   |   |
|         |                        |                      |          |          | 47   | 84  | 47.0000    | 110.1916 |                                                                |                         |    |    |   |   |   |   |
| FN0736  |                        |                      |          |          | 5    |     | 6.8507     |          | AAL94932.1  Methyltransferase                                  |                         |    |    |   |   |   |   |
|         |                        |                      |          |          | 6    |     | 6.0000     |          |                                                                |                         |    |    |   |   |   |   |
| FN0738  | -0.806                 | 11.458               | 7.814e-4 | 3.119e-4 | 33   | 55  | 45.2146    | 66.8088  | AAL94934.1  Hypothetical exported 24-amino acid repeat protein |                         |    |    |   |   |   |   |
|         |                        |                      |          |          | 35   | 56  | 35.0000    | 73.4611  |                                                                |                         |    |    |   |   |   |   |
| FN0739  | -0.513                 | 15.451               | 1.985e-3 | 1.275e-3 | 125  | 196 | 171.2675   | 238.0824 | AAL94935.1  Formiminotetrahydrofolate cyclodeaminase           |                         |    |    |   |   |   |   |
|         |                        |                      |          |          | 183  | 204 | 183.0000   | 267.6083 |                                                                |                         |    |    |   |   |   |   |

Show detected proteins only  
 Show all proteins  
 Filter by category:

Proteins found: 1338

Enter (or paste) list of ORFs

Find ORFs

Test Cutoff

q-Value

p-Value

| Signif | Direction | Applies To   |
|--------|-----------|--------------|
| yes    | +         | ratios, bars |
| no     | n/a       | bars         |
| yes    | -         | ratios, bars |
| yes    | +         | p-, q-Values |
| yes    | -         | p-, q-Values |

Dot Plots  Dot Plots

Fn Summary Table FnPg vs Fn FnSg vs Fn FnPgSg vs Fn FnPgSg vs FnPg FnSg vs FnPg FnPgSg vs FnSg Fn Coverage

| Protein | FnPg vs Fn             |                      |          |          | Raw  |     | Normalized |          | Description                                                                | Log <sub>2</sub> Ratios |    |    |   |   |   |   |
|---------|------------------------|----------------------|----------|----------|------|-----|------------|----------|----------------------------------------------------------------------------|-------------------------|----|----|---|---|---|---|
|         | Log <sub>2</sub> Ratio | Log <sub>2</sub> Sum | q-Value  | p-Value  | FnPg | Fn  | FnPg       | Fn       |                                                                            | -6                      | -4 | -2 | 0 | 2 | 4 | 6 |
| FN0740  | -0.223                 | 17.608               | 2.153e-1 | 6.116e-1 | 147  | 401 | 201.4106   | 487.0972 | AAL94936.1  Imidazolonepropionase                                          |                         |    |    |   |   |   |   |
|         |                        |                      |          |          | 626  | 365 | 626.0000   | 478.8089 |                                                                            |                         |    |    |   |   |   |   |
| FN0741  | -0.254                 | 18.286               | 1.884e-1 | 5.171e-1 | 206  | 525 | 282.2488   | 637.7208 | AAL94937.1  Glutamate formiminotransferase                                 |                         |    |    |   |   |   |   |
|         |                        |                      |          |          | 753  | 455 | 753.0000   | 596.8714 |                                                                            |                         |    |    |   |   |   |   |
| FN0742  | -0.400                 | 12.066               |          |          |      | 72  |            | 87.4588  | AAL94938.1  unknown                                                        |                         |    |    |   |   |   |   |
|         |                        |                      |          |          | 57   | 48  | 57.0000    | 62.9667  |                                                                            |                         |    |    |   |   |   |   |
| FN0743  |                        |                      |          |          |      | 9   |            | 10.9324  | AAL94939.1  ATP-dependent helicase, DinG family                            |                         |    |    |   |   |   |   |
|         |                        |                      |          |          |      | 9   |            | 11.8062  |                                                                            |                         |    |    |   |   |   |   |
| FN0745  | -0.804                 | 14.359               | 2.971e-2 | 4.461e-2 | 47   | 135 | 64.3966    | 163.9853 | AAL94941.1  metal dependent phosphohydrolase                               |                         |    |    |   |   |   |   |
|         |                        |                      |          |          | 155  | 167 | 155.0000   | 219.0715 |                                                                            |                         |    |    |   |   |   |   |
| FN0746  | 0.470                  | 7.371                |          |          | 17   | 9   | 23.2924    | 10.9324  | AAL94942.1  Hypothetical Metal-Binding Protein                             |                         |    |    |   |   |   |   |
|         |                        |                      |          |          | 7    |     | 7.0000     |          |                                                                            |                         |    |    |   |   |   |   |
| FN0749  |                        |                      |          |          |      | 10  |            | 12.1471  | AAL94945.1  Hypothetical protein                                           |                         |    |    |   |   |   |   |
|         |                        |                      |          |          |      | 6   |            | 7.8708   |                                                                            |                         |    |    |   |   |   |   |
| FN0750  | -0.814                 | 9.463                | 6.976e-3 | 7.184e-3 | 11   | 31  | 15.0715    | 37.6559  | AAL94946.1  Hypothetical protein                                           |                         |    |    |   |   |   |   |
|         |                        |                      |          |          | 25   | 25  | 25.0000    | 32.7951  |                                                                            |                         |    |    |   |   |   |   |
| FN0751  | -0.553                 | 8.549                | 4.505e-2 | 7.772e-2 | 8    | 17  | 10.9611    | 20.6500  | AAL94947.1  L-asparaginase I                                               |                         |    |    |   |   |   |   |
|         |                        |                      |          |          | 21   | 20  | 21.0000    | 26.2361  |                                                                            |                         |    |    |   |   |   |   |
| FN0752  | -0.408                 | 8.171                | 1.659e-1 | 4.341e-1 | 4    | 16  | 5.4806     | 19.4353  | AAL94948.1  Proline iminopeptidase                                         |                         |    |    |   |   |   |   |
|         |                        |                      |          |          | 24   | 15  | 24.0000    | 19.6771  |                                                                            |                         |    |    |   |   |   |   |
| FN0753  | 0.623                  | 12.598               | 6.089e-3 | 5.94e-3  | 74   | 44  | 101.3903   | 53.4471  | AAL94949.1  Glutamyl-tRNA(Gln) amidotransferase subunit B                  |                         |    |    |   |   |   |   |
|         |                        |                      |          |          | 94   | 56  | 94.0000    | 73.4611  |                                                                            |                         |    |    |   |   |   |   |
| FN0754  | -0.166                 | 13.764               | 1.542e-1 | 3.937e-1 | 64   | 102 | 87.6890    | 123.9000 | AAL94950.1  Glutamyl-tRNA(Gln) amidotransferase subunit A                  |                         |    |    |   |   |   |   |
|         |                        |                      |          |          | 135  | 96  | 135.0000   | 125.9333 |                                                                            |                         |    |    |   |   |   |   |
| FN0755  | -0.990                 | 10.984               | 4.575e-3 | 4.019e-3 | 24   | 58  | 32.8834    | 70.4530  | AAL94951.1  Glutamyl-tRNA(Gln) amidotransferase subunit C                  |                         |    |    |   |   |   |   |
|         |                        |                      |          |          | 31   | 43  | 31.0000    | 56.4076  |                                                                            |                         |    |    |   |   |   |   |
| FN0758  | -0.636                 | 15.014               | 6.197e-4 | 2.131e-4 | 97   | 179 | 132.9036   | 217.4324 | AAL94954.1  Rod shape-determining protein mreB                             |                         |    |    |   |   |   |   |
|         |                        |                      |          |          | 159  | 180 | 159.0000   | 236.1249 |                                                                            |                         |    |    |   |   |   |   |
| FN0761  | 1.146                  | 9.350                |          |          |      | 11  |            | 13.3618  | AAL94957.1  Bvg accessory factor                                           |                         |    |    |   |   |   |   |
|         |                        |                      |          |          | 38   | 16  | 38.0000    | 20.9889  |                                                                            |                         |    |    |   |   |   |   |
| FN0765  | -0.706                 | 6.321                |          |          |      | 8   |            | 9.7176   | AAL94961.1  tRNA (5-methylaminomethyl -2-thiouridylate) -methyltransferase |                         |    |    |   |   |   |   |
|         |                        |                      |          |          | 7    | 10  | 7.0000     | 13.1181  |                                                                            |                         |    |    |   |   |   |   |

Show detected proteins only  
 Show all proteins  
 Filter by category:

Proteins found: 1338

Test Cutoff

| Signif | Direction | Applies To   |
|--------|-----------|--------------|
| yes    | +         | ratios, bars |
| no     | n/a       | bars         |
| yes    | -         | ratios, bars |
| yes    | +         | p-, q-Values |
| yes    | -         |              |

Fn Summary Table FnPg vs Fn FnSg vs Fn FnPgSg vs Fn FnPgSg vs FnPg FnSg vs FnPg FnPgSg vs FnSg Fn Coverage

| Protein | FnPg vs Fn             |                      |          |          | Raw  |      | Normalized |           | Description                                                   | Log <sub>2</sub> Ratios |    |    |   |   |   |   |
|---------|------------------------|----------------------|----------|----------|------|------|------------|-----------|---------------------------------------------------------------|-------------------------|----|----|---|---|---|---|
|         | Log <sub>2</sub> Ratio | Log <sub>2</sub> Sum | q-Value  | p-Value  | FnPg | Fn   | FnPg       | Fn        |                                                               | -6                      | -4 | -2 | 0 | 2 | 4 | 6 |
| FN0766  |                        |                      |          |          |      | 15   |            | 18.2206   | AAL94962.1  Large-conductance mechanosensitive channel        |                         |    |    |   |   |   |   |
|         |                        |                      |          |          |      | 16   |            | 20.9889   |                                                               |                         |    |    |   |   |   |   |
| FN0768  | -1.501                 | 5.501                |          |          |      | 10   |            | 12.1471   | AAL94964.1  Hemin receptor                                    |                         |    |    |   |   |   |   |
|         |                        |                      |          |          | 4    | 8    | 4.0000     | 10.4944   |                                                               |                         |    |    |   |   |   |   |
| FN0771  |                        |                      |          |          |      |      |            |           | AAL94967.1  Oxygen-independent coproporphyrinogen III oxidase |                         |    |    |   |   |   |   |
|         |                        |                      |          |          |      | 14   |            | 18.3653   |                                                               |                         |    |    |   |   |   |   |
| FN0772  |                        |                      |          |          |      | 7    |            | 8.5029    | AAL94968.1  Flavodoxin                                        |                         |    |    |   |   |   |   |
|         |                        |                      |          |          |      | 3    |            | 3.9354    |                                                               |                         |    |    |   |   |   |   |
| FN0774  | -1.485                 | 13.578               | 9.811e-4 | 4.556e-4 | 60   | 148  | 82.2084    | 179.7765  | AAL94970.1  Hypothetical cytosolic protein                    |                         |    |    |   |   |   |   |
|         |                        |                      |          |          | 50   | 145  | 50.0000    | 190.2118  |                                                               |                         |    |    |   |   |   |   |
| FN0775  | -0.365                 | 16.737               | 1.277e-1 | 3.09e-1  | 126  | 313  | 172.6376   | 380.2030  | AAL94971.1  Aspartyl aminopeptidase                           |                         |    |    |   |   |   |   |
|         |                        |                      |          |          | 410  | 282  | 410.0000   | 369.9291  |                                                               |                         |    |    |   |   |   |   |
| FN0776  | -0.544                 | 12.818               | 9.877e-3 | 1.119e-2 | 48   | 75   | 65.7667    | 91.1030   | AAL94972.1  Aspartate-ammonia ligase                          |                         |    |    |   |   |   |   |
|         |                        |                      |          |          | 75   | 87   | 75.0000    | 114.1271  |                                                               |                         |    |    |   |   |   |   |
| FN0777  | -0.718                 | 11.661               | 1.643e-2 | 2.09e-2  | 29   | 50   | 39.7341    | 60.7353   | AAL94973.1  GTP-binding protein lepA                          |                         |    |    |   |   |   |   |
|         |                        |                      |          |          | 49   | 65   | 49.0000    | 85.2673   |                                                               |                         |    |    |   |   |   |   |
| FN0778  | -1.013                 | 9.000                | 3.391e-2 | 5.311e-2 | 5    | 27   | 6.8507     | 32.7971   | AAL94974.1  Methyltransferase                                 |                         |    |    |   |   |   |   |
|         |                        |                      |          |          | 25   | 24   | 25.0000    | 31.4833   |                                                               |                         |    |    |   |   |   |   |
| FN0779  |                        |                      |          |          |      |      |            |           | AAL94975.1  Putative GTPases (G3E family)                     |                         |    |    |   |   |   |   |
|         |                        |                      |          |          | 5    |      | 5.0000     |           |                                                               |                         |    |    |   |   |   |   |
| FN0783  | 0.114                  | 23.085               | 1.388e-1 | 3.433e-1 | 2527 | 2445 | 3462.3434  | 2969.9567 | AAL94979.1  acyl-CoA dehydrogenase                            |                         |    |    |   |   |   |   |
|         |                        |                      |          |          | 2744 | 2107 | 2744.0000  | 2763.9737 |                                                               |                         |    |    |   |   |   |   |
| FN0784  | -0.300                 | 22.413               | 8.082e-2 | 1.723e-1 | 1903 | 2170 | 2607.3761  | 2635.9125 | AAL94980.1  Electron transfer flavoprotein beta-subunit       |                         |    |    |   |   |   |   |
|         |                        |                      |          |          | 1653 | 1988 | 1653.0000  | 2607.8689 |                                                               |                         |    |    |   |   |   |   |
| FN0785  | 0.019                  | 21.833               | 2.747e-1 | 8.446e-1 | 1553 | 1670 | 2127.8272  | 2028.5594 | AAL94981.1  Electron transfer flavoprotein alpha-subunit      |                         |    |    |   |   |   |   |
|         |                        |                      |          |          | 1763 | 1381 | 1763.0000  | 1811.6031 |                                                               |                         |    |    |   |   |   |   |
| FN0788  | 0.597                  | 9.459                | 5.714e-3 | 5.441e-3 | 25   | 15   | 34.2535    | 18.2206   | AAL94984.1  unknown                                           |                         |    |    |   |   |   |   |
|         |                        |                      |          |          | 31   | 19   | 31.0000    | 24.9243   |                                                               |                         |    |    |   |   |   |   |
| FN0790  | -1.542                 | 6.739                | 1.755e-3 | 1.065e-3 | 3    | 15   | 4.1104     | 18.2206   | AAL94986.1  Xylose repressor                                  |                         |    |    |   |   |   |   |
|         |                        |                      |          |          | 8    | 13   | 8.0000     | 17.0535   |                                                               |                         |    |    |   |   |   |   |
| FN0791  | -0.142                 | 18.534               | 1.267e-1 | 3.059e-1 | 367  | 558  | 502.8413   | 677.8061  | AAL94987.1  Histidine ammonia-lyase                           |                         |    |    |   |   |   |   |
|         |                        |                      |          |          | 670  | 470  | 670.0000   | 616.5485  |                                                               |                         |    |    |   |   |   |   |

Show detected proteins only  
 Show all proteins  
 Filter by category:

Proteins found: 1338

Enter (or paste) list of ORFs

Find ORFs

Test Cutoff

q-Value

p-Value

.005

| Signif | Direction | Applies To   |
|--------|-----------|--------------|
| yes    | +         | ratios, bars |
| no     | n/a       | bars         |
| yes    | -         | ratios, bars |
| yes    | +         | p-, q-Values |
| yes    | -         | p-, q-Values |

Dot Plots Dot Plots

Fn Summary Table FnPg vs Fn FnSg vs Fn FnPgSg vs Fn FnPgSg vs FnPg FnSg vs FnPg FnPgSg vs FnSg Fn Coverage

| Protein | FnPg vs Fn             |                      |          |          | Raw  |      | Normalized |           | Description                                               | Log <sub>2</sub> Ratios |    |    |   |   |   |   |
|---------|------------------------|----------------------|----------|----------|------|------|------------|-----------|-----------------------------------------------------------|-------------------------|----|----|---|---|---|---|
|         | Log <sub>2</sub> Ratio | Log <sub>2</sub> Sum | q-Value  | p-Value  | FnPg | Fn   | FnPg       | Fn        |                                                           | -6                      | -4 | -2 | 0 | 2 | 4 | 6 |
| FN0792  | 0.041                  | 20.440               | 2.873e-1 | 8.985e-1 | 573  | 1002 | 785.0901   | 1217.1356 | AAL94988.1  Urocanate hydratase                           |                         |    |    |   |   |   |   |
|         |                        |                      |          |          | 1635 | 865  | 1635.0000  | 1134.7116 |                                                           |                         |    |    |   |   |   |   |
| FN0793  | -0.749                 | 7.919                |          |          |      | 17   |            | 20.6500   | AAL94989.1  Sodium/glutamate symport carrier protein      |                         |    |    |   |   |   |   |
|         |                        |                      |          |          | 12   | 15   | 12.0000    | 19.6771   |                                                           |                         |    |    |   |   |   |   |
| FN0794  | 0.570                  | 7.244                |          |          |      | 8    |            | 9.7176    | AAL94990.1  Hypothetical protein                          |                         |    |    |   |   |   |   |
|         |                        |                      |          |          | 15   | 8    | 15.0000    | 10.4944   |                                                           |                         |    |    |   |   |   |   |
| FN0796  | -0.165                 | 15.072               | 1.399e-1 | 3.468e-1 | 104  | 168  | 142.4945   | 204.0706  | AAL94992.1  Pyruvate,phosphate dikinase                   |                         |    |    |   |   |   |   |
|         |                        |                      |          |          | 208  | 144  | 208.0000   | 188.9000  |                                                           |                         |    |    |   |   |   |   |
| FN0798  | -0.232                 | 7.274                | 2.163e-1 | 6.154e-1 | 8    | 6    | 10.9611    | 7.2882    | AAL94994.1  Fructose-1,6-bisphosphatase                   |                         |    |    |   |   |   |   |
|         |                        |                      |          |          | 12   | 15   | 12.0000    | 19.6771   |                                                           |                         |    |    |   |   |   |   |
| FN0799  | 0.417                  | 8.365                | 1.651e-1 | 4.315e-1 | 8    | 14   | 10.9611    | 17.0059   | AAL94995.1  Isoamylase                                    |                         |    |    |   |   |   |   |
|         |                        |                      |          |          | 31   | 11   | 31.0000    | 14.4299   |                                                           |                         |    |    |   |   |   |   |
| FN0800  | -0.203                 | 10.414               | 2.558e-1 | 7.663e-1 | 5    | 35   | 6.8507     | 42.5147   | AAL94996.1  Amino acid-binding protein                    |                         |    |    |   |   |   |   |
|         |                        |                      |          |          | 62   | 28   | 62.0000    | 36.7305   |                                                           |                         |    |    |   |   |   |   |
| FN0801  | 0.663                  | 7.677                |          |          |      | 9    |            | 10.9324   | AAL94997.1  Amino acid transport ATP-binding protein      |                         |    |    |   |   |   |   |
|         |                        |                      |          |          | 18   | 9    | 18.0000    | 11.8062   |                                                           |                         |    |    |   |   |   |   |
| FN0802  |                        |                      |          |          |      |      |            |           | AAL94998.1  Amino acid transport system permease protein  |                         |    |    |   |   |   |   |
|         |                        |                      |          |          | 6    |      | 6.0000     |           |                                                           |                         |    |    |   |   |   |   |
| FN0803  | -1.108                 | 12.619               | 9.426e-3 | 1.057e-2 | 46   | 114  | 63.0264    | 138.4765  | AAL94999.1  Cytochrome C-TYPE biogenesis protein ccdA     |                         |    |    |   |   |   |   |
|         |                        |                      |          |          | 45   | 72   | 45.0000    | 94.4500   |                                                           |                         |    |    |   |   |   |   |
| FN0805  | 1.098                  | 6.525                |          |          | 11   |      | 15.0715    |           | AAL95001.1  Hypothetical protein                          |                         |    |    |   |   |   |   |
|         |                        |                      |          |          | 13   | 5    | 13.0000    | 6.5590    |                                                           |                         |    |    |   |   |   |   |
| FN0806  | -0.933                 | 12.992               | 3.472e-3 | 2.747e-3 | 45   | 92   | 61.6563    | 111.7530  | AAL95002.1  SpoIID homolog                                |                         |    |    |   |   |   |   |
|         |                        |                      |          |          | 69   | 105  | 69.0000    | 137.7396  |                                                           |                         |    |    |   |   |   |   |
| FN0807  | -0.123                 | 10.335               | 2.081e-1 | 5.857e-1 | 24   | 38   | 32.8834    | 46.1588   | AAL95003.1  3-deoxy-manno-octulosonate cytidyltransferase |                         |    |    |   |   |   |   |
|         |                        |                      |          |          | 36   | 22   | 36.0000    | 28.8597   |                                                           |                         |    |    |   |   |   |   |
| FN0808  | 0.194                  | 12.115               | 7.773e-2 | 1.635e-1 | 58   | 55   | 79.4681    | 66.8088   | AAL95004.1  Phosphoglycerate mutase                       |                         |    |    |   |   |   |   |
|         |                        |                      |          |          | 63   | 44   | 63.0000    | 57.7194   |                                                           |                         |    |    |   |   |   |   |
| FN0809  | -1.688                 | 7.688                |          |          |      | 23   |            | 27.9382   | AAL95005.1  23S rRNA methyltransferase                    |                         |    |    |   |   |   |   |
|         |                        |                      |          |          | 8    | 18   | 8.0000     | 23.6125   |                                                           |                         |    |    |   |   |   |   |
| FN0810  | -0.040                 | 11.620               | 2.449e-1 | 7.231e-1 | 45   | 44   | 61.6563    | 53.4471   | AAL95006.1  Low-specificity threonine aldolase            |                         |    |    |   |   |   |   |
|         |                        |                      |          |          | 49   | 46   | 49.0000    | 60.3430   |                                                           |                         |    |    |   |   |   |   |

Show detected proteins only  
 Show all proteins  
 Filter by category:

Proteins found: 1338

Enter (or paste) list of ORFs

Find ORFs

Test Cutoff

q-Value

p-Value

.005

| Signif | Direction | Applies To   |
|--------|-----------|--------------|
| yes    | +         | ratios, bars |
| no     | n/a       | bars         |
| yes    | -         | ratios, bars |
| yes    | +         | p-, q-Values |
| yes    | -         | p-, q-Values |

Dot Plots Dot Plots



Fn Summary Table FnPg vs Fn FnSg vs Fn FnPgSg vs Fn FnPgSg vs FnPg FnSg vs FnPg FnPgSg vs FnSg Fn Coverage

| Protein | FnPg vs Fn             |                      |          |          | Raw  |     | Normalized |           | Description                                         | Log <sub>2</sub> Ratios |    |    |   |   |   |   |
|---------|------------------------|----------------------|----------|----------|------|-----|------------|-----------|-----------------------------------------------------|-------------------------|----|----|---|---|---|---|
|         | Log <sub>2</sub> Ratio | Log <sub>2</sub> Sum | q-Value  | p-Value  | FnPg | Fn  | FnPg       | Fn        |                                                     | -6                      | -4 | -2 | 0 | 2 | 4 | 6 |
| FN0813  | 1.746                  | 8.898                |          |          |      | 11  |            | 13.3618   | AAL95009.1  Transcriptional regulator, TetR family  |                         |    |    |   |   |   |   |
|         |                        |                      |          |          | 40   | 8   | 40.0000    | 10.4944   |                                                     |                         |    |    |   |   |   |   |
| FN0814  | -3.939                 | 13.406               | 4.364e-6 | 2.23e-7  | 33   | 322 | 45.2146    | 391.1354  | AAL95010.1  Propionate CoA-transferase              |                         |    |    |   |   |   |   |
|         |                        |                      |          |          | 8    | 324 | 8.0000     | 425.0249  |                                                     |                         |    |    |   |   |   |   |
| FN0815  |                        |                      |          |          |      | 47  |            | 57.0912   | AAL95011.1  Propionate permease                     |                         |    |    |   |   |   |   |
|         |                        |                      |          |          |      | 39  |            | 51.1604   |                                                     |                         |    |    |   |   |   |   |
| FN0816  | -2.404                 | 13.956               |          |          | 40   | 228 | 54.8056    | 276.9530  | AAL95012.1  dehydrogenase with MaoC-like domain     |                         |    |    |   |   |   |   |
|         |                        |                      |          |          |      |     |            | 303.0270  |                                                     |                         |    |    |   |   |   |   |
| FN0818  | -0.807                 | 19.104               | 2.353e-2 | 3.323e-2 | 567  | 761 | 776.8693   | 924.3914  | AAL95014.1  DNA-binding protein HU                  |                         |    |    |   |   |   |   |
|         |                        |                      |          |          | 358  | 809 | 358.0000   | 1061.2505 |                                                     |                         |    |    |   |   |   |   |
| FN0819  | -0.455                 | 11.840               | 4.324e-2 | 7.337e-2 | 47   | 53  | 64.3966    | 64.3794   | AAL95015.1  Tetratricopeptide repeat family protein |                         |    |    |   |   |   |   |
|         |                        |                      |          |          | 39   | 59  | 39.0000    | 77.3965   |                                                     |                         |    |    |   |   |   |   |
| FN0820  | -0.033                 | 14.729               | 2.787e-1 | 8.615e-1 | 94   | 134 | 128.7931   | 162.7706  | AAL95016.1  Mercuric reductase                      |                         |    |    |   |   |   |   |
|         |                        |                      |          |          | 197  | 130 | 197.0000   | 170.5347  |                                                     |                         |    |    |   |   |   |   |
| FN0821  | -0.301                 | 13.129               | 1.883e-1 | 5.166e-1 | 96   | 79  | 131.5334   | 95.9618   | AAL95017.1  Hypothetical protein                    |                         |    |    |   |   |   |   |
|         |                        |                      |          |          | 39   | 87  | 39.0000    | 114.1271  |                                                     |                         |    |    |   |   |   |   |
| FN0823  | 1.149                  | 9.558                | 2.902e-2 | 4.329e-2 | 21   | 12  | 28.7729    | 14.5765   | AAL95019.1  GTP-binding protein hflX                |                         |    |    |   |   |   |   |
|         |                        |                      |          |          | 53   | 17  | 53.0000    | 22.3007   |                                                     |                         |    |    |   |   |   |   |
| FN0825  | -1.068                 | 12.189               | 1.567e-2 | 1.965e-2 | 20   | 83  | 27.4028    | 100.8206  | AAL95021.1  Hypothetical cytosolic protein          |                         |    |    |   |   |   |   |
|         |                        |                      |          |          | 67   | 74  | 67.0000    | 97.0736   |                                                     |                         |    |    |   |   |   |   |
| FN0826  | -1.809                 | 9.442                | 4.137e-4 | 1.131e-4 | 14   | 37  | 19.1820    | 44.9441   | AAL95022.1  periplasmic component of efflux system  |                         |    |    |   |   |   |   |
|         |                        |                      |          |          | 9    | 41  | 9.0000     | 53.7840   |                                                     |                         |    |    |   |   |   |   |
| FN0827  | -2.166                 | 9.449                | 9.592e-3 | 1.08e-2  | 8    | 35  | 10.9611    | 42.5147   | AAL95023.1  ABC transporter ATP-binding protein     |                         |    |    |   |   |   |   |
|         |                        |                      |          |          | 14   | 53  | 14.0000    | 69.5257   |                                                     |                         |    |    |   |   |   |   |
| FN0828  |                        |                      |          |          |      | 17  |            | 20.6500   | AAL95024.1  ABC transporter permease protein        |                         |    |    |   |   |   |   |
|         |                        |                      |          |          |      | 15  |            | 19.6771   |                                                     |                         |    |    |   |   |   |   |
| FN0830  | 1.059                  | 11.207               | 1.03e-3  | 4.918e-4 | 55   | 22  | 75.3577    | 26.7235   | AAL95026.1  Hypothetical protein                    |                         |    |    |   |   |   |   |
|         |                        |                      |          |          | 65   | 31  | 65.0000    | 40.6660   |                                                     |                         |    |    |   |   |   |   |
| FN0831  |                        |                      |          |          | 13   |     | 17.8118    |           | AAL95027.1  Hemin receptor                          |                         |    |    |   |   |   |   |
|         |                        |                      |          |          | 6    |     | 6.0000     |           |                                                     |                         |    |    |   |   |   |   |
| FN0832  | 0.110                  | 12.638               | 2.816e-1 | 8.741e-1 | 105  | 65  | 143.8647   | 78.9559   | AAL95028.1  Hypothetical protein                    |                         |    |    |   |   |   |   |
|         |                        |                      |          |          | 22   | 57  | 22.0000    | 74.7729   |                                                     |                         |    |    |   |   |   |   |

Show detected proteins only  
 Show all proteins  
 Filter by category:

Proteins found: 1338

Enter (or paste) list of ORFs

Find ORFs

Test Cutoff

q-Value

p-Value

.005

| Signif | Direction | Applies To   |
|--------|-----------|--------------|
| yes    | +         | ratios, bars |
| no     | n/a       | bars         |
| yes    | -         | ratios, bars |
| yes    | +         | p-, q-Values |
| yes    | -         | p-, q-Values |

Dot Plots Dot Plots

Fn Summary Table

FnPg vs Fn

FnSg vs Fn

FnPgSg vs Fn

FnPgSg vs FnPg

FnSg vs FnPg

FnPgSg vs FnSg

Fn Coverage

| Protein | FnPg vs Fn             |                      |          |          | Raw  |     | Normalized |          | Description                                         | Log <sub>2</sub> Ratios |    |    |   |   |   |   |
|---------|------------------------|----------------------|----------|----------|------|-----|------------|----------|-----------------------------------------------------|-------------------------|----|----|---|---|---|---|
|         | Log <sub>2</sub> Ratio | Log <sub>2</sub> Sum | q-Value  | p-Value  | FnPg | Fn  | FnPg       | Fn       |                                                     | -6                      | -4 | -2 | 0 | 2 | 4 | 6 |
| FN0833  | -3.561                 | 8.205                |          |          |      | 41  |            | 49.8030  | AAL95029.1  Hypothetical protein                    |                         |    |    |   |   |   |   |
|         |                        |                      |          |          | 5    | 52  | 5.0000     | 68.2139  |                                                     |                         |    |    |   |   |   |   |
| FN0834  | -0.508                 | 10.209               | 1.577e-1 | 4.055e-1 | 37   | 33  | 50.6952    | 40.0853  | AAL95030.1  Hypothetical Exported Protein           |                         |    |    |   |   |   |   |
|         |                        |                      |          |          | 7    | 32  | 7.0000     | 41.9778  |                                                     |                         |    |    |   |   |   |   |
| FN0835  |                        |                      |          |          | 27   |     | 36.9938    |          | AAL95031.1  Hypothetical protein                    |                         |    |    |   |   |   |   |
|         |                        |                      |          |          | 4    |     | 4.0000     |          |                                                     |                         |    |    |   |   |   |   |
| FN0836  | 1.061                  | 8.887                | 5.62e-2  | 1.054e-1 | 32   | 14  | 43.8445    | 17.0059  | AAL95032.1  Hypothetical protein                    |                         |    |    |   |   |   |   |
|         |                        |                      |          |          | 19   | 10  | 19.0000    | 13.1181  |                                                     |                         |    |    |   |   |   |   |
| FN0846  | 0.094                  | 13.359               | 1.674e-1 | 4.394e-1 | 83   | 91  | 113.7216   | 110.5383 | AAL95042.1  Hypothetical Exported Protein           |                         |    |    |   |   |   |   |
|         |                        |                      |          |          | 98   | 67  | 98.0000    | 87.8910  |                                                     |                         |    |    |   |   |   |   |
| FN0847  | -1.659                 | 7.659                |          |          |      | 20  |            | 24.2941  | AAL95043.1  TPR-repeat-containing proteins          |                         |    |    |   |   |   |   |
|         |                        |                      |          |          | 8    | 20  | 8.0000     | 26.2361  |                                                     |                         |    |    |   |   |   |   |
| FN0848  |                        |                      |          |          | 5    |     | 6.8507     |          | AAL95044.1  Hypothetical protein                    |                         |    |    |   |   |   |   |
| FN0849  | 0.764                  | 11.033               | 3.726e-3 | 3.018e-3 | 44   | 33  | 60.2862    | 40.0853  | AAL95045.1  8-amino-7-oxononanoate synthase         |                         |    |    |   |   |   |   |
|         |                        |                      |          |          | 59   | 23  | 59.0000    | 30.1715  |                                                     |                         |    |    |   |   |   |   |
| FN0850  | 0.248                  | 9.184                | 1.255e-1 | 3.022e-1 | 15   | 17  | 20.5521    | 20.6500  | AAL95046.1  Hypothetical cytosolic protein          |                         |    |    |   |   |   |   |
|         |                        |                      |          |          | 32   | 18  | 32.0000    | 23.6125  |                                                     |                         |    |    |   |   |   |   |
| FN0853  | 0.961                  | 12.611               | 6.882e-3 | 7.045e-3 | 91   | 48  | 124.6827   | 58.3059  | AAL95049.1  Glycogen synthase                       |                         |    |    |   |   |   |   |
|         |                        |                      |          |          | 96   | 42  | 96.0000    | 55.0958  |                                                     |                         |    |    |   |   |   |   |
| FN0854  | 1.630                  | 13.097               | 4.36e-3  | 3.751e-3 | 139  | 39  | 190.4494   | 47.3735  | AAL95050.1  Glucose-1-phosphate adenylyltransferase |                         |    |    |   |   |   |   |
|         |                        |                      |          |          | 139  | 45  | 139.0000   | 59.0312  |                                                     |                         |    |    |   |   |   |   |
| FN0855  | 0.488                  | 14.558               | 6.521e-2 | 1.302e-1 | 102  | 109 | 139.7543   | 132.4030 | AAL95051.1  Glucose-1-phosphate adenylyltransferase |                         |    |    |   |   |   |   |
|         |                        |                      |          |          | 228  | 99  | 228.0000   | 129.8687 |                                                     |                         |    |    |   |   |   |   |
| FN0856  | 1.224                  | 13.568               | 1.528e-4 | 2.598e-5 | 124  | 55  | 169.8973   | 66.8088  | AAL95052.1  1,4-alpha-glucan branching enzyme       |                         |    |    |   |   |   |   |
|         |                        |                      |          |          | 167  | 59  | 167.0000   | 77.3965  |                                                     |                         |    |    |   |   |   |   |
| FN0857  | 0.317                  | 15.822               | 9.16e-2  | 2.026e-1 | 155  | 192 | 212.3717   | 233.2236 | AAL95053.1  Glycogen phosphorylase                  |                         |    |    |   |   |   |   |
|         |                        |                      |          |          | 325  | 151 | 325.0000   | 198.0826 |                                                     |                         |    |    |   |   |   |   |
| FN0858  | 1.039                  | 10.442               | 1.199e-3 | 6.356e-4 | 35   | 18  | 47.9549    | 21.8647  | AAL95054.1  4-alpha-glucanotransferase              |                         |    |    |   |   |   |   |
|         |                        |                      |          |          | 59   | 23  | 59.0000    | 30.1715  |                                                     |                         |    |    |   |   |   |   |
| FN0865  | 2.292                  | 12.857               | 9.565e-2 | 2.144e-1 | 17   | 36  | 23.2924    | 43.7294  | AAL95061.1  unknown                                 |                         |    |    |   |   |   |   |
|         |                        |                      |          |          | 358  | 26  | 358.0000   | 34.1069  |                                                     |                         |    |    |   |   |   |   |

Show detected proteins only  
 Show all proteins  
 Filter by category:

Proteins found:  
1338

Test Cutoff

| Signif | Direction | Applies To   |
|--------|-----------|--------------|
| yes    | +         | ratios, bars |
| no     | n/a       | bars         |
| yes    | -         | ratios, bars |
| yes    | +         | p-, q-Values |
| yes    | -         |              |

Fn Summary Table FnPg vs Fn FnSg vs Fn FnPgSg vs Fn FnPgSg vs FnPg FnSg vs FnPg FnPgSg vs FnSg Fn Coverage

| Protein | FnPg vs Fn             |                      |          |          | Raw  |     | Normalized |          | Description                                                  | Log <sub>2</sub> Ratios |    |    |   |   |   |   |
|---------|------------------------|----------------------|----------|----------|------|-----|------------|----------|--------------------------------------------------------------|-------------------------|----|----|---|---|---|---|
|         | Log <sub>2</sub> Ratio | Log <sub>2</sub> Sum | q-Value  | p-Value  | FnPg | Fn  | FnPg       | Fn       |                                                              | -6                      | -4 | -2 | 0 | 2 | 4 | 6 |
| FN0867  | -2.181                 | 12.264               | 1.015e-4 | 1.38e-5  | 24   | 126 | 32.8834    | 153.0530 | AAL95063.1  Long-chain-fatty-acid--CoA ligase                |                         |    |    |   |   |   |   |
|         |                        |                      |          |          | 33   | 111 | 33.0000    | 145.6104 |                                                              |                         |    |    |   |   |   |   |
| FN0868  |                        |                      |          |          |      |     |            |          | AAL95064.1  ATPases of the PP superfamily                    |                         |    |    |   |   |   |   |
|         |                        |                      |          |          |      |     |            |          |                                                              |                         |    |    |   |   |   |   |
| FN0869  | -0.713                 | 4.713                |          |          |      |     |            |          | AAL95065.1  Hydrolase (HAD superfamily)                      |                         |    |    |   |   |   |   |
|         |                        |                      |          |          |      |     |            |          |                                                              |                         |    |    |   |   |   |   |
| FN0870  |                        |                      |          |          |      |     |            |          | AAL95066.1  Rhodanese-related sulfurtransferases             |                         |    |    |   |   |   |   |
|         |                        |                      |          |          |      |     |            |          |                                                              |                         |    |    |   |   |   |   |
| FN0871  | 0.193                  | 7.807                |          |          |      |     |            |          | AAL95067.1  3-dehydroquinase synthase                        |                         |    |    |   |   |   |   |
|         |                        |                      |          |          |      |     |            |          |                                                              |                         |    |    |   |   |   |   |
| FN0873  | 1.534                  | 10.390               | 7.542e-2 | 1.571e-1 |      |     |            |          | AAL95069.1  Protease IV                                      |                         |    |    |   |   |   |   |
|         |                        |                      |          |          |      |     |            |          |                                                              |                         |    |    |   |   |   |   |
| FN0874  |                        |                      |          |          |      |     |            |          | AAL95070.1  Phosphohydrolase (MUTT/NUDIX family protein)     |                         |    |    |   |   |   |   |
|         |                        |                      |          |          |      |     |            |          |                                                              |                         |    |    |   |   |   |   |
| FN0878  | -0.755                 | 8.025                | 4.545e-2 | 7.868e-2 |      |     |            |          | AAL95074.1  Transcriptional regulator, GntR family           |                         |    |    |   |   |   |   |
|         |                        |                      |          |          |      |     |            |          |                                                              |                         |    |    |   |   |   |   |
| FN0885  |                        |                      |          |          |      |     |            |          | AAL95081.1  Hemin-binding periplasmic protein hmuT precursor |                         |    |    |   |   |   |   |
|         |                        |                      |          |          |      |     |            |          |                                                              |                         |    |    |   |   |   |   |
| FN0886  |                        |                      |          |          |      |     |            |          | AAL95082.1  Hemin receptor                                   |                         |    |    |   |   |   |   |
|         |                        |                      |          |          |      |     |            |          |                                                              |                         |    |    |   |   |   |   |
| FN0887  | -1.252                 | 11.062               | 2.731e-3 | 1.965e-3 |      |     |            |          | AAL95083.1  Oligoendopeptidase F                             |                         |    |    |   |   |   |   |
|         |                        |                      |          |          |      |     |            |          |                                                              |                         |    |    |   |   |   |   |
| FN0888  | -1.032                 | 9.253                | 3.171e-3 | 2.428e-3 |      |     |            |          | AAL95084.1  Uracil permease                                  |                         |    |    |   |   |   |   |
|         |                        |                      |          |          |      |     |            |          |                                                              |                         |    |    |   |   |   |   |
| FN0889  | 1.569                  | 8.230                | 9.02e-2  | 1.987e-1 |      |     |            |          | AAL95085.1  hypothetical protein                             |                         |    |    |   |   |   |   |
|         |                        |                      |          |          |      |     |            |          |                                                              |                         |    |    |   |   |   |   |
| FN0893  | -1.479                 | 7.093                |          |          |      |     |            |          | AAL95089.1  Hypothetical protein                             |                         |    |    |   |   |   |   |
|         |                        |                      |          |          |      |     |            |          |                                                              |                         |    |    |   |   |   |   |
| FN0896  | -0.599                 | 8.237                | 6.117e-2 | 1.193e-1 |      |     |            |          | AAL95092.1  Hypothetical protein                             |                         |    |    |   |   |   |   |
|         |                        |                      |          |          |      |     |            |          |                                                              |                         |    |    |   |   |   |   |
| FN0898  |                        |                      |          |          |      |     |            |          | AAL95094.1  Hypothetical protein                             |                         |    |    |   |   |   |   |
|         |                        |                      |          |          |      |     |            |          |                                                              |                         |    |    |   |   |   |   |
| FN0896  |                        |                      |          |          |      |     |            |          | AAL95092.1  Hypothetical protein                             |                         |    |    |   |   |   |   |
|         |                        |                      |          |          |      |     |            |          |                                                              |                         |    |    |   |   |   |   |
| FN0898  |                        |                      |          |          |      |     |            |          | AAL95094.1  Hypothetical protein                             |                         |    |    |   |   |   |   |
|         |                        |                      |          |          |      |     |            |          |                                                              |                         |    |    |   |   |   |   |
| FN0898  |                        |                      |          |          |      |     |            |          | AAL95094.1  Hypothetical protein                             |                         |    |    |   |   |   |   |
|         |                        |                      |          |          |      |     |            |          |                                                              |                         |    |    |   |   |   |   |

Show detected proteins only  
 Show all proteins  
 Filter by category:

Proteins found: 1338

Enter (or paste) list of ORFs

Find ORFs

Test Cutoff

q-Value

p-Value

.005

| Signif | Direction | Applies To   |
|--------|-----------|--------------|
| yes    | +         | ratios, bars |
| no     | n/a       | bars         |
| yes    | -         | ratios, bars |
| yes    | +         | p-, q-Values |
| yes    | -         | p-, q-Values |

Dot Plots  Dot Plots

Fn Summary Table FnPg vs Fn FnSg vs Fn FnPgSg vs Fn FnPgSg vs FnPg FnSg vs FnPg FnPgSg vs FnSg Fn Coverage

| Protein | FnPg vs Fn             |                      |          |          | Raw  |     | Normalized |          | Description                                                                        | Log <sub>2</sub> Ratios |    |    |   |   |   |   |
|---------|------------------------|----------------------|----------|----------|------|-----|------------|----------|------------------------------------------------------------------------------------|-------------------------|----|----|---|---|---|---|
|         | Log <sub>2</sub> Ratio | Log <sub>2</sub> Sum | q-Value  | p-Value  | FnPg | Fn  | FnPg       | Fn       |                                                                                    | -6                      | -4 | -2 | 0 | 2 | 4 | 6 |
| FN0900  | -0.025                 | 5.001                | 2.996e-1 | 9.537e-1 | 6    | 4   | 8.2208     | 4.8588   | AAL95096.1  Metal dependent hydrolase                                              |                         |    |    |   |   |   |   |
|         |                        |                      |          |          | 3    | 5   | 3.0000     | 6.5590   |                                                                                    |                         |    |    |   |   |   |   |
| FN0901  | 0.456                  | 5.883                |          |          |      |     |            |          | AAL95097.1  DNA polymerase, bacteriophage-type                                     |                         |    |    |   |   |   |   |
|         |                        |                      |          |          | 9    | 5   | 9.0000     | 6.5590   |                                                                                    |                         |    |    |   |   |   |   |
| FN0903  | 0.985                  | 8.149                | 1.034e-2 | 1.181e-2 | 20   | 10  | 27.4028    | 12.1471  | AAL95099.1  Polysialic acid capsule expression protein kpsF                        |                         |    |    |   |   |   |   |
|         |                        |                      |          |          | 20   | 9   | 20.0000    | 11.8062  |                                                                                    |                         |    |    |   |   |   |   |
| FN0904  |                        |                      |          |          |      |     |            |          | AAL95100.1  NAD(FAD)-utilizing dehydrogenases                                      |                         |    |    |   |   |   |   |
|         |                        |                      |          |          | 4    |     | 4.0000     |          |                                                                                    |                         |    |    |   |   |   |   |
| FN0905  |                        |                      |          |          |      |     |            |          | AAL95101.1  Hypothetical protein                                                   |                         |    |    |   |   |   |   |
|         |                        |                      |          |          |      | 17  |            | 20.6500  |                                                                                    |                         |    |    |   |   |   |   |
| FN0906  | -0.153                 | 9.234                | 8.966e-2 | 1.971e-1 | 15   | 21  | 20.5521    | 25.5088  | AAL95102.1  Glycerol-3-phosphate dehydrogenase [NAD(P)+]                           |                         |    |    |   |   |   |   |
|         |                        |                      |          |          | 26   | 20  | 26.0000    | 26.2361  |                                                                                    |                         |    |    |   |   |   |   |
| FN0908  | -0.956                 | 8.770                |          |          |      |     |            |          | AAL95104.1  Tpl protein                                                            |                         |    |    |   |   |   |   |
|         |                        |                      |          |          | 15   | 24  | 15.0000    | 31.4833  |                                                                                    |                         |    |    |   |   |   |   |
| FN0909  |                        |                      |          |          | 7    |     | 9.5910     |          | AAL95105.1  DNA repair protein radC                                                |                         |    |    |   |   |   |   |
|         |                        |                      |          |          |      |     |            |          |                                                                                    |                         |    |    |   |   |   |   |
| FN0910  | 0.050                  | 5.950                |          |          |      |     |            |          | AAL95106.1  Nicotinate-nucleotide--dimethylbenzimidazole phosphoribosyltransferase |                         |    |    |   |   |   |   |
|         |                        |                      |          |          | 8    | 9   | 8.0000     | 11.8062  |                                                                                    |                         |    |    |   |   |   |   |
| FN0911  | -0.258                 | 6.598                |          |          |      |     |            |          | AAL95107.1  Alpha-ribazole-5'-phosphate phosphatase                                |                         |    |    |   |   |   |   |
|         |                        |                      |          |          | 9    | 9   | 9.0000     | 11.8062  |                                                                                    |                         |    |    |   |   |   |   |
| FN0912  |                        |                      |          |          |      |     |            |          | AAL95108.1  Cobalamin [5'-phosphate] synthase                                      |                         |    |    |   |   |   |   |
|         |                        |                      |          |          | 19   |     | 19.0000    |          |                                                                                    |                         |    |    |   |   |   |   |
| FN0913  | 0.177                  | 6.466                |          |          |      |     |            |          | AAL95109.1  Cobinamide kinase                                                      |                         |    |    |   |   |   |   |
|         |                        |                      |          |          | 10   | 7   | 10.0000    | 9.1826   |                                                                                    |                         |    |    |   |   |   |   |
| FN0915  | 0.563                  | 10.087               | 1.446e-1 | 3.619e-1 | 14   | 22  | 19.1820    | 26.7235  | AAL95111.1  PTS system, N-acetylglucosamine-specific IIA component                 |                         |    |    |   |   |   |   |
|         |                        |                      |          |          | 61   | 21  | 61.0000    | 27.5479  |                                                                                    |                         |    |    |   |   |   |   |
| FN0916  | -0.426                 | 14.600               | 6.671e-2 | 1.341e-1 | 70   | 141 | 95.9098    | 171.2736 | AAL95112.1  Hypothetical Exported Protein                                          |                         |    |    |   |   |   |   |
|         |                        |                      |          |          | 176  | 148 | 176.0000   | 194.1472 |                                                                                    |                         |    |    |   |   |   |   |
| FN0917  | -1.434                 | 5.434                |          |          |      |     |            |          | AAL95113.1  Hypothetical protein                                                   |                         |    |    |   |   |   |   |
|         |                        |                      |          |          | 4    | 10  | 4.0000     | 13.1181  |                                                                                    |                         |    |    |   |   |   |   |
| FN0920  | 0.123                  | 6.521                |          |          |      |     |            |          | AAL95116.1  Protease HTPX                                                          |                         |    |    |   |   |   |   |
|         |                        |                      |          |          | 10   | 7   | 10.0000    | 9.1826   |                                                                                    |                         |    |    |   |   |   |   |

Show detected proteins only  
 Show all proteins  
 Filter by category:

Proteins found: 1338

Test Cutoff

| Signif | Direction | Applies To   |
|--------|-----------|--------------|
| yes    | +         | ratios, bars |
| no     | n/a       | bars         |
| yes    | -         | ratios, bars |
| yes    | +         | p-, q-Values |
| yes    | -         |              |

Fn Summary Table

FnPg vs Fn

FnSg vs Fn

FnPgSg vs Fn

FnPgSg vs FnPg

FnSg vs FnPg

FnPgSg vs FnSg

Fn Coverage

| Protein | FnPg vs Fn             |                      |          |          | Raw  |     | Normalized |          | Description                                         | Log <sub>2</sub> Ratios |    |    |   |   |   |   |
|---------|------------------------|----------------------|----------|----------|------|-----|------------|----------|-----------------------------------------------------|-------------------------|----|----|---|---|---|---|
|         | Log <sub>2</sub> Ratio | Log <sub>2</sub> Sum | q-Value  | p-Value  | FnPg | Fn  | FnPg       | Fn       |                                                     | -6                      | -4 | -2 | 0 | 2 | 4 | 6 |
| FN0921  | 2.442                  | 8.542                |          |          |      | 5   |            | 6.0735   | AAL95117.1  Hypothetical protein                    |                         |    |    |   |   |   |   |
|         |                        |                      |          |          | 45   | 8   | 45.0000    | 10.4944  |                                                     |                         |    |    |   |   |   |   |
| FN0923  |                        |                      |          |          |      |     |            |          | AAL95119.1  Cardiolipin synthetase                  |                         |    |    |   |   |   |   |
|         |                        |                      |          |          | 4    |     | 4.0000     |          |                                                     |                         |    |    |   |   |   |   |
| FN0925  | -1.009                 | 6.179                |          |          |      | 8   |            | 9.7176   | AAL95121.1  Hypothetical protein                    |                         |    |    |   |   |   |   |
|         |                        |                      |          |          | 6    | 11  | 6.0000     | 14.4299  |                                                     |                         |    |    |   |   |   |   |
| FN0926  | 2.552                  | 8.283                |          |          | 31   | 6   | 42.4743    | 7.2882   | AAL95122.1  GTP pyrophosphokinase                   |                         |    |    |   |   |   |   |
|         |                        |                      |          |          | 43   |     | 43.0000    |          |                                                     |                         |    |    |   |   |   |   |
| FN0928  | 0.234                  | 6.410                |          |          |      | 7   |            | 8.5029   | AAL95124.1  O-sialoglycoprotein endopeptidase       |                         |    |    |   |   |   |   |
|         |                        |                      |          |          | 10   |     | 10.0000    |          |                                                     |                         |    |    |   |   |   |   |
| FN0929  |                        |                      |          |          |      |     |            |          | AAL95125.1  ATP/GTP hydrolase                       |                         |    |    |   |   |   |   |
|         |                        |                      |          |          | 12   |     | 16.4417    |          |                                                     |                         |    |    |   |   |   |   |
| FN0930  | -1.586                 | 6.895                | 6.277e-3 | 6.195e-3 | 7    | 16  | 9.5910     | 19.4353  | AAL95126.1  Glycerol-3-phosphate cytidyltransferase |                         |    |    |   |   |   |   |
|         |                        |                      |          |          | 3    | 14  | 3.0000     | 18.3653  |                                                     |                         |    |    |   |   |   |   |
| FN0932  | -0.282                 | 8.096                |          |          |      | 16  |            | 19.4353  | AAL95128.1  Hypothetical protein                    |                         |    |    |   |   |   |   |
|         |                        |                      |          |          | 15   | 13  | 15.0000    | 17.0535  |                                                     |                         |    |    |   |   |   |   |
| FN0934  | 1.256                  | 7.529                |          |          |      | 8   |            | 9.7176   | AAL95130.1  Chorismate synthase                     |                         |    |    |   |   |   |   |
|         |                        |                      |          |          | 21   | 6   | 21.0000    | 7.8708   |                                                     |                         |    |    |   |   |   |   |
| FN0938  |                        |                      |          |          |      |     |            |          | AAL95134.1  Hypothetical protein                    |                         |    |    |   |   |   |   |
|         |                        |                      |          |          | 47   |     | 47.0000    |          |                                                     |                         |    |    |   |   |   |   |
| FN0940  |                        |                      |          |          |      |     |            |          | AAL95136.1  Hypothetical protein                    |                         |    |    |   |   |   |   |
|         |                        |                      |          |          | 41   |     | 41.0000    |          |                                                     |                         |    |    |   |   |   |   |
| FN0941  | 1.593                  | 10.529               | 3.764e-3 | 3.06e-3  | 42   | 17  | 57.5459    | 20.6500  | AAL95137.1  Gamma-glutamyltranspeptidase            |                         |    |    |   |   |   |   |
|         |                        |                      |          |          | 76   | 18  | 76.0000    | 23.6125  |                                                     |                         |    |    |   |   |   |   |
| FN0943  | 1.943                  | 8.232                |          |          |      | 7   |            | 8.5029   | AAL95139.1  Sensory Transduction Protein Kinase     |                         |    |    |   |   |   |   |
|         |                        |                      |          |          | 34   | 7   | 34.0000    | 9.1826   |                                                     |                         |    |    |   |   |   |   |
| FN0944  |                        |                      |          |          |      |     |            |          | AAL95140.1  Na+ driven multidrug efflux pump        |                         |    |    |   |   |   |   |
|         |                        |                      |          |          | 4    |     | 4.0000     |          |                                                     |                         |    |    |   |   |   |   |
| FN0947  | -0.292                 | 12.982               | 1.46e-1  | 3.666e-1 | 80   | 71  | 109.6112   | 86.2441  | AAL95143.1  Hypothetical protein                    |                         |    |    |   |   |   |   |
|         |                        |                      |          |          | 53   | 86  | 53.0000    | 112.8153 |                                                     |                         |    |    |   |   |   |   |
| FN0949  | -1.101                 | 15.535               | 5.008e-2 | 8.975e-2 | 196  | 251 | 268.5474   | 304.8913 | AAL95145.1  DNA helicase                            |                         |    |    |   |   |   |   |
|         |                        |                      |          |          | 29   | 254 | 29.0000    | 333.1985 |                                                     |                         |    |    |   |   |   |   |

Show detected proteins only  
 Show all proteins  
 Filter by category:

Proteins found:  
1338

Test Cutoff

| Signif | Direction | Applies To   |
|--------|-----------|--------------|
| yes    | +         | ratios, bars |
| no     | n/a       | bars         |
| yes    | -         | ratios, bars |
| yes    | +         | p-, q-Values |
| yes    | -         |              |

Fn Summary Table FnPg vs Fn FnSg vs Fn FnPgSg vs Fn FnPgSg vs FnPg FnSg vs FnPg FnPgSg vs FnSg Fn Coverage

| Protein | FnPg vs Fn             |                      |          |          | Raw  |    | Normalized |         | Description                                                        | Log <sub>2</sub> Ratios |    |    |   |   |   |   |
|---------|------------------------|----------------------|----------|----------|------|----|------------|---------|--------------------------------------------------------------------|-------------------------|----|----|---|---|---|---|
|         | Log <sub>2</sub> Ratio | Log <sub>2</sub> Sum | q-Value  | p-Value  | FnPg | Fn | FnPg       | Fn      |                                                                    | -6                      | -4 | -2 | 0 | 2 | 4 | 6 |
| FN0951  | -0.699                 | 7.680                | 6.285e-2 | 1.24e-1  | 4    | 16 | 5.4806     | 19.4353 | AAL95147.1  Precorrin-3B C17-methyltransferase                     |                         |    |    |   |   |   |   |
|         |                        |                      |          |          | 17   | 13 | 17.0000    | 17.0535 |                                                                    |                         |    |    |   |   |   |   |
| FN0952  |                        |                      |          |          |      |    |            |         | AAL95148.1  Cobalamin biosynthesis protein G                       |                         |    |    |   |   |   |   |
|         |                        |                      |          |          |      | 6  |            | 7.8708  |                                                                    |                         |    |    |   |   |   |   |
| FN0957  | 0.610                  | 8.568                | 5.36e-2  | 9.857e-2 | 22   | 13 | 30.1431    | 15.7912 | AAL95153.1  Precorrin-4 C11-methyltransferase                      |                         |    |    |   |   |   |   |
|         |                        |                      |          |          | 18   | 12 | 18.0000    | 15.7417 |                                                                    |                         |    |    |   |   |   |   |
| FN0958  | 0.088                  | 9.464                |          |          | 20   | 23 | 27.4028    | 27.9382 | AAL95154.1  unknown                                                |                         |    |    |   |   |   |   |
|         |                        |                      |          |          |      | 18 |            | 23.6125 |                                                                    |                         |    |    |   |   |   |   |
| FN0959  | -1.417                 | 8.838                | 6.722e-3 | 6.814e-3 | 14   | 23 | 19.1820    | 27.9382 | AAL95155.1  Precorrin-2 C20-methyltransferase                      |                         |    |    |   |   |   |   |
|         |                        |                      |          |          | 7    | 32 | 7.0000     | 41.9778 |                                                                    |                         |    |    |   |   |   |   |
| FN0961  | 1.043                  | 6.383                | 5.123e-2 | 9.257e-2 | 6    | 4  | 8.2208     | 4.8588  | AAL95157.1  Hypothetical protein                                   |                         |    |    |   |   |   |   |
|         |                        |                      |          |          | 18   | 6  | 18.0000    | 7.8708  |                                                                    |                         |    |    |   |   |   |   |
| FN0962  | -0.529                 | 10.719               | 3.717e-3 | 3.008e-3 | 28   | 38 | 38.3639    | 46.1588 | AAL95158.1  Hypothetical cytosolic protein                         |                         |    |    |   |   |   |   |
|         |                        |                      |          |          | 30   | 40 | 30.0000    | 52.4722 |                                                                    |                         |    |    |   |   |   |   |
| FN0964  |                        |                      |          |          | 5    |    | 6.8507     |         | AAL95160.1  Precorrin-8W decarboxylase                             |                         |    |    |   |   |   |   |
|         |                        |                      |          |          | 6    |    | 6.0000     |         |                                                                    |                         |    |    |   |   |   |   |
| FN0965  | 0.981                  | 10.948               | 4.022e-3 | 3.349e-3 | 51   | 24 | 69.8771    | 29.1529 | AAL95161.1  D-3-phosphoglycerate dehydrogenase                     |                         |    |    |   |   |   |   |
|         |                        |                      |          |          | 55   | 26 | 55.0000    | 34.1069 |                                                                    |                         |    |    |   |   |   |   |
| FN0966  |                        |                      |          |          |      |    |            |         | AAL95162.1  Precorrin-6Y C5,15-methyltransferase (decarboxylating) |                         |    |    |   |   |   |   |
|         |                        |                      |          |          | 3    |    | 3.0000     |         |                                                                    |                         |    |    |   |   |   |   |
| FN0967  |                        |                      |          |          | 7    |    | 9.5910     |         | AAL95163.1  CbiD protein                                           |                         |    |    |   |   |   |   |
|         |                        |                      |          |          |      |    |            |         |                                                                    |                         |    |    |   |   |   |   |
| FN0970  | -0.918                 | 8.166                |          |          | 9    | 20 | 12.3313    | 24.2941 | AAL95166.1  Precorrin-8X methylmutase                              |                         |    |    |   |   |   |   |
|         |                        |                      |          |          |      | 17 |            | 22.3007 |                                                                    |                         |    |    |   |   |   |   |
| FN0972  |                        |                      |          |          | 3    |    | 4.1104     |         | AAL95168.1  Cobyrinic acid a,c-diamide synthase                    |                         |    |    |   |   |   |   |
|         |                        |                      |          |          | 22   |    | 22.0000    |         |                                                                    |                         |    |    |   |   |   |   |
| FN0974  |                        |                      |          |          | 4    |    | 4.0000     |         | AAL95170.1  Lactoylglutathione lyase                               |                         |    |    |   |   |   |   |
|         |                        |                      |          |          |      |    |            |         |                                                                    |                         |    |    |   |   |   |   |
| FN0976  | 0.212                  | 10.842               | 8.715e-3 | 9.619e-3 | 33   | 31 | 45.2146    | 37.6559 | AAL95172.1  Hypothetical protein                                   |                         |    |    |   |   |   |   |
|         |                        |                      |          |          | 47   | 32 | 47.0000    | 41.9778 |                                                                    |                         |    |    |   |   |   |   |
| FN0977  | 0.466                  | 7.027                |          |          | 5    | 8  | 6.8507     | 9.7176  | AAL95173.1  Cobyrinic acid synthase                                |                         |    |    |   |   |   |   |
|         |                        |                      |          |          | 20   |    | 20.0000    |         |                                                                    |                         |    |    |   |   |   |   |

Show detected proteins only  
 Show all proteins  
 Filter by category:

Proteins found:  
1338

Test Cutoff

| Signif | Direction | Applies To   |
|--------|-----------|--------------|
| yes    | +         | ratios, bars |
| no     | n/a       | bars         |
| yes    | -         | ratios, bars |
| yes    | +         | p-, q-Values |
| yes    | -         |              |

Fn Summary Table FnPg vs Fn FnSg vs Fn FnPgSg vs Fn FnPgSg vs FnPg FnSg vs FnPg FnPgSg vs FnSg Fn Coverage

| Protein | FnPg vs Fn             |                      |          |          | Raw  |      | Normalized |           | Description                                                              | Log <sub>2</sub> Ratios |    |    |   |   |   |   |
|---------|------------------------|----------------------|----------|----------|------|------|------------|-----------|--------------------------------------------------------------------------|-------------------------|----|----|---|---|---|---|
|         | Log <sub>2</sub> Ratio | Log <sub>2</sub> Sum | q-Value  | p-Value  | FnPg | Fn   | FnPg       | Fn        |                                                                          | -6                      | -4 | -2 | 0 | 2 | 4 | 6 |
| FN0981  | -0.541                 | 13.269               | 9.925e-2 | 2.25e-1  | 29   | 98   | 39.7341    | 119.0412  | AAL95177.1  Phosphoribosylamine--glycine ligase                          |                         |    |    |   |   |   |   |
|         |                        |                      |          |          | 125  | 92   | 125.0000   | 120.6861  |                                                                          |                         |    |    |   |   |   |   |
| FN0982  | -0.982                 | 15.812               | 3.046e-3 | 2.291e-3 | 101  | 272  | 138.3841   | 330.4001  | AAL95178.1  Phosphoribosylaminoimidazolecarboxamide formyltransferase    |                         |    |    |   |   |   |   |
|         |                        |                      |          |          | 203  | 262  | 203.0000   | 343.6930  |                                                                          |                         |    |    |   |   |   |   |
| FN0983  | -0.487                 | 14.330               | 1.85e-2  | 2.448e-2 | 104  | 135  | 142.4945   | 163.9853  | AAL95179.1  Hypothetical protein                                         |                         |    |    |   |   |   |   |
|         |                        |                      |          |          | 100  | 134  | 100.0000   | 175.7819  |                                                                          |                         |    |    |   |   |   |   |
| FN0984  | 0.262                  | 9.711                | 6.168e-2 | 1.208e-1 | 20   | 23   | 27.4028    | 27.9382   | AAL95180.1  Tetracenomycin polyketide synthesis O-methyltransferase tcmP |                         |    |    |   |   |   |   |
|         |                        |                      |          |          | 36   | 19   | 36.0000    | 24.9243   |                                                                          |                         |    |    |   |   |   |   |
| FN0985  | -0.225                 | 6.225                |          |          |      | 10   |            | 12.1471   | AAL95181.1  Phosphoribosylglycinamide formyltransferase                  |                         |    |    |   |   |   |   |
|         |                        |                      |          |          | 8    | 5    | 8.0000     | 6.5590    |                                                                          |                         |    |    |   |   |   |   |
| FN0986  | 0.244                  | 14.606               | 2.176e-1 | 6.201e-1 | 64   | 119  | 87.6890    | 144.5500  | AAL95182.1  Phosphoribosylformylglycinamide cyclase                      |                         |    |    |   |   |   |   |
|         |                        |                      |          |          | 256  | 111  | 256.0000   | 145.6104  |                                                                          |                         |    |    |   |   |   |   |
| FN0987  | -0.757                 | 13.564               | 8.981e-2 | 1.976e-1 | 17   | 106  | 23.2924    | 128.7589  | AAL95183.1  Amidophosphoribosyltransferase                               |                         |    |    |   |   |   |   |
|         |                        |                      |          |          | 146  | 120  | 146.0000   | 157.4166  |                                                                          |                         |    |    |   |   |   |   |
| FN0988  | -0.446                 | 16.009               | 5.721e-2 | 1.081e-1 | 116  | 243  | 158.9362   | 295.1736  | AAL95184.1  Phosphoribosylamidoimidazole-succinocarboxamide synthase     |                         |    |    |   |   |   |   |
|         |                        |                      |          |          | 281  | 232  | 281.0000   | 304.3388  |                                                                          |                         |    |    |   |   |   |   |
| FN0989  | 0.155                  | 14.899               | 8.33e-2  | 1.794e-1 | 121  | 141  | 165.7869   | 171.2736  | AAL95185.1  Phosphoribosylaminoimidazole carboxylase catalytic subunit   |                         |    |    |   |   |   |   |
|         |                        |                      |          |          | 203  | 122  | 203.0000   | 160.0402  |                                                                          |                         |    |    |   |   |   |   |
| FN0990  | -0.490                 | 20.379               | 9.099e-2 | 2.009e-1 | 411  | 1164 | 563.1275   | 1413.9180 | AAL95186.1  Phosphoribosylformylglycinamide synthase                     |                         |    |    |   |   |   |   |
|         |                        |                      |          |          | 1408 | 1032 | 1408.0000  | 1353.7830 |                                                                          |                         |    |    |   |   |   |   |
| FN0991  | 0.655                  | 8.967                | 1.629e-2 | 2.067e-2 | 22   | 11   | 30.1431    | 13.3618   | AAL95187.1  CDP-diacylglycerol--serine O-phosphatidyltransferase         |                         |    |    |   |   |   |   |
|         |                        |                      |          |          | 26   | 17   | 26.0000    | 22.3007   |                                                                          |                         |    |    |   |   |   |   |
| FN0992  | -1.170                 | 9.310                | 1.187e-2 | 1.391e-2 | 7    | 32   | 9.5910     | 38.8706   | AAL95188.1  ADP-heptose:LPS heptosyltransferase II                       |                         |    |    |   |   |   |   |
|         |                        |                      |          |          | 24   | 28   | 24.0000    | 36.7305   |                                                                          |                         |    |    |   |   |   |   |
| FN0994  | -0.521                 | 13.603               | 1.042e-1 | 2.392e-1 | 33   | 112  | 45.2146    | 136.0471  | AAL95190.1  Hypothetical protein                                         |                         |    |    |   |   |   |   |
|         |                        |                      |          |          | 141  | 100  | 141.0000   | 131.1805  |                                                                          |                         |    |    |   |   |   |   |
| FN0997  | 0.196                  | 10.477               | 2.442e-1 | 7.205e-1 | 13   | 30   | 17.8118    | 36.4412   | AAL95193.1  Hypothetical protein                                         |                         |    |    |   |   |   |   |
|         |                        |                      |          |          | 63   | 26   | 63.0000    | 34.1069   |                                                                          |                         |    |    |   |   |   |   |
| FN0998  | -0.464                 | 14.207               | 8.798e-2 | 1.924e-1 | 52   | 132  | 71.2473    | 160.3412  | AAL95194.1  Dipeptide-binding protein                                    |                         |    |    |   |   |   |   |
|         |                        |                      |          |          | 163  | 124  | 163.0000   | 162.6639  |                                                                          |                         |    |    |   |   |   |   |
| FN0999  | 1.169                  | 10.601               | 1.08e-1  | 2.5e-1   | 14   | 26   | 19.1820    | 31.5824   | AAL95195.1  Deblocking aminopeptidase                                    |                         |    |    |   |   |   |   |
|         |                        |                      |          |          | 99   | 16   | 99.0000    | 20.9889   |                                                                          |                         |    |    |   |   |   |   |

Show detected proteins only  
 Show all proteins  
 Filter by category:

Proteins found: 1338

Test Cutoff

| Signif | Direction | Applies To   |
|--------|-----------|--------------|
| yes    | +         | ratios, bars |
| no     | n/a       | bars         |
| yes    | -         | ratios, bars |
| yes    | +         | p-, q-Values |
| yes    | -         | p-, q-Values |

Fn Summary Table

FnPg vs Fn

FnSg vs Fn

FnPgSg vs Fn

FnPgSg vs FnPg

FnSg vs FnPg

FnPgSg vs FnSg

Fn Coverage

| Protein | FnPg vs Fn             |                      |          |          | Raw  |     | Normalized |          | Description                                                            | Log <sub>2</sub> Ratios |    |    |   |   |   |   |
|---------|------------------------|----------------------|----------|----------|------|-----|------------|----------|------------------------------------------------------------------------|-------------------------|----|----|---|---|---|---|
|         | Log <sub>2</sub> Ratio | Log <sub>2</sub> Sum | q-Value  | p-Value  | FnPg | Fn  | FnPg       | Fn       |                                                                        | -6                      | -4 | -2 | 0 | 2 | 4 | 6 |
| FN1000  | -1.723                 | 10.632               |          |          | 16   | 63  | 21.9222    | 76.5265  | AAL95196.1  Biotin synthase                                            |                         |    |    |   |   |   |   |
|         |                        |                      |          |          |      |     |            | 68.2139  |                                                                        |                         |    |    |   |   |   |   |
| FN1001  | 0.363                  | 10.024               | 1.78e-1  | 4.78e-1  | 14   | 22  | 19.1820    | 26.7235  | AAL95197.1  Dethiobiotin synthetase                                    |                         |    |    |   |   |   |   |
|         |                        |                      |          |          | 54   | 23  | 54.0000    | 30.1715  |                                                                        |                         |    |    |   |   |   |   |
| FN1002  | 0.038                  | 12.127               | 2.916e-1 | 9.176e-1 | 69   | 59  | 94.5396    | 71.6677  | AAL95198.1  Adenosylmethionine-8-amino-7-oxononanoate aminotransferase |                         |    |    |   |   |   |   |
|         |                        |                      |          |          | 41   | 46  | 41.0000    | 60.3430  |                                                                        |                         |    |    |   |   |   |   |
| FN1003  | 2.452                  | 12.779               | 1.031e-1 | 2.361e-1 | 6    | 32  | 8.2208     | 38.8706  | AAL95199.1  Outer membrane protein P1 precursor                        |                         |    |    |   |   |   |   |
|         |                        |                      |          |          | 384  | 25  | 384.0000   | 32.7951  |                                                                        |                         |    |    |   |   |   |   |
| FN1004  | -0.043                 | 8.170                | 2.818e-1 | 8.748e-1 | 12   | 10  | 16.4417    | 12.1471  | AAL95200.1  Transcriptional regulator, TetR family                     |                         |    |    |   |   |   |   |
|         |                        |                      |          |          | 17   | 17  | 17.0000    | 22.3007  |                                                                        |                         |    |    |   |   |   |   |
| FN1005  | -1.383                 | 11.558               |          |          |      | 78  |            | 94.7471  | AAL95201.1  Hypothetical protein                                       |                         |    |    |   |   |   |   |
|         |                        |                      |          |          | 34   | 63  | 34.0000    | 82.6437  |                                                                        |                         |    |    |   |   |   |   |
| FN1006  |                        |                      |          |          |      |     |            |          | AAL95202.1  Acetyltransferase                                          |                         |    |    |   |   |   |   |
|         |                        |                      |          |          | 21   |     | 21.0000    |          |                                                                        |                         |    |    |   |   |   |   |
| FN1008  |                        |                      |          |          |      | 4   |            | 4.8588   | AAL95204.1  Hypothetical protein                                       |                         |    |    |   |   |   |   |
|         |                        |                      |          |          |      |     |            |          |                                                                        |                         |    |    |   |   |   |   |
| FN1009  |                        |                      |          |          |      | 8   |            | 9.7176   | AAL95205.1  Hypothetical protein                                       |                         |    |    |   |   |   |   |
|         |                        |                      |          |          |      | 3   |            | 3.9354   |                                                                        |                         |    |    |   |   |   |   |
| FN1010  | 0.010                  | 14.731               | 3.047e-1 | 9.77e-1  | 73   | 128 | 100.0202   | 155.4824 | AAL95206.1  Hypothetical cytosolic protein                             |                         |    |    |   |   |   |   |
|         |                        |                      |          |          | 231  | 132 | 231.0000   | 173.1583 |                                                                        |                         |    |    |   |   |   |   |
| FN1011  | -0.119                 | 7.081                | 2.358e-1 | 6.877e-1 | 9    | 7   | 12.3313    | 8.5029   | AAL95207.1  MGPA protein                                               |                         |    |    |   |   |   |   |
|         |                        |                      |          |          | 10   | 12  | 10.0000    | 15.7417  |                                                                        |                         |    |    |   |   |   |   |
| FN1012  | 0.540                  | 9.286                | 1.597e-2 | 2.014e-2 | 25   | 19  | 34.2535    | 23.0794  | AAL95208.1  HPR(Ser) kinase                                            |                         |    |    |   |   |   |   |
|         |                        |                      |          |          | 26   | 14  | 26.0000    | 18.3653  |                                                                        |                         |    |    |   |   |   |   |
| FN1014  | -0.074                 | 8.992                |          |          |      | 23  |            | 27.9382  | AAL95210.1  Folylpolyglutamate synthase                                |                         |    |    |   |   |   |   |
|         |                        |                      |          |          | 22   | 14  | 22.0000    | 18.3653  |                                                                        |                         |    |    |   |   |   |   |
| FN1015  | 0.151                  | 9.565                |          |          |      | 16  |            | 19.4353  | AAL95211.1  5'-methylthioadenosine nucleosidase                        |                         |    |    |   |   |   |   |
|         |                        |                      |          |          | 29   | 25  | 29.0000    | 32.7951  |                                                                        |                         |    |    |   |   |   |   |
| FN1016  | -0.913                 | 8.474                | 4.779e-2 | 8.424e-2 | 4    | 21  | 5.4806     | 25.5088  | AAL95212.1  Lipid A biosynthesis lauroyl acyltransferase               |                         |    |    |   |   |   |   |
|         |                        |                      |          |          | 22   | 20  | 22.0000    | 26.2361  |                                                                        |                         |    |    |   |   |   |   |
| FN1017  | -0.810                 | 13.336               | 2.757e-2 | 4.055e-2 | 34   | 104 | 46.5848    | 126.3294 | AAL95213.1  Hypothetical Exported Protein                              |                         |    |    |   |   |   |   |
|         |                        |                      |          |          | 107  | 109 | 107.0000   | 142.9868 |                                                                        |                         |    |    |   |   |   |   |

- Show detected proteins only  
 Show all proteins

Filter by category:

GO: amino acid transport

Proteins found:  
1338

Enter (or  
paste) list  
of ORFs

Find ORFs

Test

Cutoff

q-Value

p-Value

.005

| Signif | Direction | Applies To   |
|--------|-----------|--------------|
| yes    | +         | ratios, bars |
| no     | n/a       | bars         |
| yes    | -         | ratios, bars |
| yes    | +         | p-, q-Values |
| yes    | -         | p-, q-Values |

Dot Plots

Dot Plots



Fn Summary Table FnPg vs Fn FnSg vs Fn FnPgSg vs Fn FnPgSg vs FnPg FnSg vs FnPg FnPgSg vs FnSg Fn Coverage

| Protein | FnPg vs Fn             |                      |          |          | Raw  |      | Normalized |           | Description                                                  | Log <sub>2</sub> Ratios |    |    |   |   |   |   |
|---------|------------------------|----------------------|----------|----------|------|------|------------|-----------|--------------------------------------------------------------|-------------------------|----|----|---|---|---|---|
|         | Log <sub>2</sub> Ratio | Log <sub>2</sub> Sum | q-Value  | p-Value  | FnPg | Fn   | FnPg       | Fn        |                                                              | -6                      | -4 | -2 | 0 | 2 | 4 | 6 |
| FN1019  | 1.988                  | 22.716               | 7.01e-4  | 2.607e-4 | 3572 | 1077 | 4894.1395  | 1308.2386 | AAL95215.1  3-hydroxybutyryl-CoA dehydrogenase               |                         |    |    |   |   |   |   |
|         |                        |                      |          |          | 5563 | 1012 | 5563.0000  | 1327.5469 |                                                              |                         |    |    |   |   |   |   |
| FN1020  | 1.393                  | 17.148               | 8.937e-5 | 1.135e-5 | 460  | 195  | 630.2643   | 236.8677  | AAL95216.1  3-hydroxybutyryl-CoA dehydratase                 |                         |    |    |   |   |   |   |
|         |                        |                      |          |          | 605  | 178  | 605.0000   | 233.5013  |                                                              |                         |    |    |   |   |   |   |
| FN1022  |                        |                      |          |          |      | 26   |            | 31.5824   | AAL95218.1  Calcium-transporting ATPase                      |                         |    |    |   |   |   |   |
|         |                        |                      |          |          |      | 45   |            | 59.0312   |                                                              |                         |    |    |   |   |   |   |
| FN1023  |                        |                      |          |          | 17   |      | 17.0000    |           | AAL95219.1  5-Nitroimidazole antibiotic resistance protein   |                         |    |    |   |   |   |   |
|         |                        |                      |          |          |      |      |            |           |                                                              |                         |    |    |   |   |   |   |
| FN1024  | -0.259                 | 20.496               | 5.749e-2 | 1.089e-1 | 934  | 1079 | 1279.7106  | 1310.6680 | AAL95220.1  DNA-binding protein HU                           |                         |    |    |   |   |   |   |
|         |                        |                      |          |          | 943  | 1029 | 943.0000   | 1349.8476 |                                                              |                         |    |    |   |   |   |   |
| FN1025  | 0.257                  | 8.083                |          |          |      | 14   |            | 17.0059   | AAL95221.1  Guanine-hypoxanthine permease                    |                         |    |    |   |   |   |   |
|         |                        |                      |          |          |      | 18   | 18.0000    | 13.1181   |                                                              |                         |    |    |   |   |   |   |
| FN1026  |                        |                      |          |          |      | 14   |            | 17.0059   | AAL95222.1  tRNA pseudouridine synthase A                    |                         |    |    |   |   |   |   |
|         |                        |                      |          |          |      | 6    |            | 7.8708    |                                                              |                         |    |    |   |   |   |   |
| FN1028  | -0.690                 | 10.293               | 4.263e-2 | 7.194e-2 | 21   | 46   | 28.7729    | 55.8765   | AAL95224.1  Deoxyuridine 5'-triphosphate nucleotidohydrolase |                         |    |    |   |   |   |   |
|         |                        |                      |          |          | 27   | 26   | 27.0000    | 34.1069   |                                                              |                         |    |    |   |   |   |   |
| FN1029  | -0.677                 | 13.217               | 6.642e-4 | 2.383e-4 | 55   | 106  | 75.3577    | 128.7589  | AAL95225.1  Zinc protease                                    |                         |    |    |   |   |   |   |
|         |                        |                      |          |          | 79   | 90   | 79.0000    | 118.0625  |                                                              |                         |    |    |   |   |   |   |
| FN1030  | 2.719                  | 6.451                |          |          |      | 3    |            | 3.6441    | AAL95226.1  Hypothetical membrane-spanning protein           |                         |    |    |   |   |   |   |
|         |                        |                      |          |          | 24   |      | 24.0000    |           |                                                              |                         |    |    |   |   |   |   |
| FN1031  | 0.330                  | 6.840                |          |          |      | 6    |            | 7.2882    | AAL95227.1  Hypothetical membrane-spanning protein           |                         |    |    |   |   |   |   |
|         |                        |                      |          |          | 12   | 9    | 12.0000    | 11.8062   |                                                              |                         |    |    |   |   |   |   |
| FN1033  | -0.493                 | 12.379               | 2.38e-2  | 3.371e-2 | 46   | 81   | 63.0264    | 98.3912   | AAL95229.1  Methyltransferase                                |                         |    |    |   |   |   |   |
|         |                        |                      |          |          | 60   | 57   | 60.0000    | 74.7729   |                                                              |                         |    |    |   |   |   |   |
| FN1037  |                        |                      |          |          |      |      |            |           | AAL95233.1  Hypothetical cytosolic protein                   |                         |    |    |   |   |   |   |
|         |                        |                      |          |          | 15   |      | 15.0000    |           |                                                              |                         |    |    |   |   |   |   |
| FN1041  |                        |                      |          |          | 5    |      | 6.8507     |           | AAL95237.1  Acetyltransferase                                |                         |    |    |   |   |   |   |
|         |                        |                      |          |          | 16   |      | 16.0000    |           |                                                              |                         |    |    |   |   |   |   |
| FN1042  | -2.915                 | 10.932               | 2.608e-4 | 5.805e-5 | 14   | 107  | 19.1820    | 129.9736  | AAL95238.1  S1 RNA binding domain                            |                         |    |    |   |   |   |   |
|         |                        |                      |          |          | 13   | 86   | 13.0000    | 112.8153  |                                                              |                         |    |    |   |   |   |   |
| FN1045  |                        |                      |          |          |      | 7    |            | 8.5029    | AAL95241.1  Hypothetical protein                             |                         |    |    |   |   |   |   |
|         |                        |                      |          |          |      | 4    |            | 5.2472    |                                                              |                         |    |    |   |   |   |   |

Show detected proteins only  
 Show all proteins  
 Filter by category:

Proteins found: 1338

Enter (or paste) list of ORFs

Test Cutoff

| Signif      | Direction | Applies To |
|-------------|-----------|------------|
| red         | yes       | +          |
| yellow      | no        | n/a        |
| green       | yes       | -          |
| pink        | yes       | +          |
| light green | yes       | -          |

Applies To: ratios, bars; bars; ratios, bars; p-, q-Values

Fn Summary Table

FnPg vs Fn

FnSg vs Fn

FnPgSg vs Fn

FnPgSg vs FnPg

FnSg vs FnPg

FnPgSg vs FnSg

Fn Coverage

| Protein | FnPg vs Fn             |                      |          |          | Raw  |    | Normalized |         | Description                                           | Log <sub>2</sub> Ratios |    |    |   |   |   |   |
|---------|------------------------|----------------------|----------|----------|------|----|------------|---------|-------------------------------------------------------|-------------------------|----|----|---|---|---|---|
|         | Log <sub>2</sub> Ratio | Log <sub>2</sub> Sum | q-Value  | p-Value  | FnPg | Fn | FnPg       | Fn      |                                                       | -6                      | -4 | -2 | 0 | 2 | 4 | 6 |
| FN1050  | 0.963                  | 7.139                |          |          | 22   | 7  | 30.1431    | 8.5029  | AAL95246.1  Lactoylglutathione lyase                  |                         |    |    |   |   |   |   |
|         |                        |                      |          |          | 3    |    | 3.0000     |         |                                                       |                         |    |    |   |   |   |   |
| FN1053  |                        |                      |          |          | 8    |    | 10.9611    |         | AAL95249.1  Hypothetical protein                      |                         |    |    |   |   |   |   |
|         |                        |                      |          |          |      |    |            |         |                                                       |                         |    |    |   |   |   |   |
| FN1055  | 0.210                  | 11.779               | 1.959e-1 | 5.433e-1 | 31   | 40 | 42.4743    | 48.5882 | AAL95251.1  Cysteine synthase                         |                         |    |    |   |   |   |   |
|         |                        |                      |          |          | 85   | 47 | 85.0000    | 61.6548 |                                                       |                         |    |    |   |   |   |   |
| FN1057  |                        |                      |          |          |      |    |            | 9.7176  | AAL95253.1  Diamine acetyltransferase                 |                         |    |    |   |   |   |   |
|         |                        |                      |          |          |      |    |            | 7.8708  |                                                       |                         |    |    |   |   |   |   |
| FN1060  | 0.259                  | 9.702                | 2.678e-2 | 3.909e-2 | 22   | 24 | 30.1431    | 29.1529 | AAL95256.1  hypothetical cytosolic protein            |                         |    |    |   |   |   |   |
|         |                        |                      |          |          | 33   | 18 | 33.0000    | 23.6125 |                                                       |                         |    |    |   |   |   |   |
| FN1062  | -0.585                 | 12.657               | 2.795e-2 | 4.127e-2 | 60   | 80 | 82.2084    | 97.1765 | AAL95258.1  Hydrolase                                 |                         |    |    |   |   |   |   |
|         |                        |                      |          |          | 49   | 76 | 49.0000    | 99.6972 |                                                       |                         |    |    |   |   |   |   |
| FN1063  | 1.195                  | 8.197                | 1.172e-1 | 2.768e-1 | 5    | 10 | 6.8507     | 12.1471 | AAL95259.1  N-acyl-L-amino acid amidohydrolase        |                         |    |    |   |   |   |   |
|         |                        |                      |          |          | 45   | 8  | 45.0000    | 10.4944 |                                                       |                         |    |    |   |   |   |   |
| FN1066  | -0.017                 | 6.272                | 3.01e-1  | 9.601e-1 | 4    | 7  | 5.4806     | 8.5029  | AAL95262.1  Exodeoxyribonuclease VII large subunit    |                         |    |    |   |   |   |   |
|         |                        |                      |          |          | 12   | 7  | 12.0000    | 9.1826  |                                                       |                         |    |    |   |   |   |   |
| FN1067  | -1.650                 | 11.075               | 8.144e-4 | 3.35e-4  | 12   | 75 | 16.4417    | 91.1030 | AAL95263.1  Tetratricopeptide repeat family protein   |                         |    |    |   |   |   |   |
|         |                        |                      |          |          | 36   | 56 | 36.0000    | 73.4611 |                                                       |                         |    |    |   |   |   |   |
| FN1068  |                        |                      |          |          | 3    |    | 4.1104     |         | AAL95264.1  Smf protein                               |                         |    |    |   |   |   |   |
|         |                        |                      |          |          | 16   |    | 16.0000    |         |                                                       |                         |    |    |   |   |   |   |
| FN1069  | -0.652                 | 12.442               | 4.102e-4 | 1.116e-4 | 46   | 73 | 63.0264    | 88.6736 | AAL95265.1  DNA topoisomerase I                       |                         |    |    |   |   |   |   |
|         |                        |                      |          |          | 56   | 75 | 56.0000    | 98.3854 |                                                       |                         |    |    |   |   |   |   |
| FN1070  | -1.251                 | 7.591                |          |          |      | 18 |            | 21.8647 | AAL95266.1  Glucose inhibited division protein A      |                         |    |    |   |   |   |   |
|         |                        |                      |          |          | 9    | 16 | 9.0000     | 20.9889 |                                                       |                         |    |    |   |   |   |   |
| FN1071  |                        |                      |          |          |      |    |            | 5.2472  | AAL95267.1  Integrase/recombinase                     |                         |    |    |   |   |   |   |
|         |                        |                      |          |          |      | 4  |            |         |                                                       |                         |    |    |   |   |   |   |
| FN1072  | -0.740                 | 11.295               | 5.045e-3 | 4.61e-3  | 34   | 57 | 46.5848    | 69.2383 | AAL95268.1  GTP-binding protein                       |                         |    |    |   |   |   |   |
|         |                        |                      |          |          | 31   | 46 | 31.0000    | 60.3430 |                                                       |                         |    |    |   |   |   |   |
| FN1073  | -1.142                 | 6.312                |          |          |      | 11 |            | 13.3618 | AAL95269.1  Hypothetical protein                      |                         |    |    |   |   |   |   |
|         |                        |                      |          |          | 6    | 10 | 6.0000     | 13.1181 |                                                       |                         |    |    |   |   |   |   |
| FN1074  | -0.644                 | 9.742                | 1.966e-2 | 2.653e-2 | 13   | 30 | 17.8118    | 36.4412 | AAL95270.1  Signal recognition particle receptor FtsY |                         |    |    |   |   |   |   |
|         |                        |                      |          |          | 29   | 28 | 29.0000    | 36.7305 |                                                       |                         |    |    |   |   |   |   |

Show detected proteins only  
 Show all proteins  
 Filter by category:

Proteins found:  
1338

Enter (or paste) list of ORFs

Find ORFs

Test Cutoff

q-Value

p-Value

.005

| Signif | Direction | Applies To   |
|--------|-----------|--------------|
| yes    | +         | ratios, bars |
| no     | n/a       | bars         |
| yes    | -         | ratios, bars |
| yes    | +         | p-, q-Values |
| yes    | -         | p-, q-Values |

Dot Plots

Fn Summary Table FnPg vs Fn FnSg vs Fn FnPgSg vs Fn FnPgSg vs FnPg FnSg vs FnPg FnPgSg vs FnSg Fn Coverage

| Protein       | FnPg vs Fn             |                      |          |          | Raw  |     | Normalized |          | Description                                                                       | Log <sub>2</sub> Ratios |    |    |   |   |   |   |
|---------------|------------------------|----------------------|----------|----------|------|-----|------------|----------|-----------------------------------------------------------------------------------|-------------------------|----|----|---|---|---|---|
|               | Log <sub>2</sub> Ratio | Log <sub>2</sub> Sum | q-Value  | p-Value  | FnPg | Fn  | FnPg       | Fn       |                                                                                   | -6                      | -4 | -2 | 0 | 2 | 4 | 6 |
| <b>FN1077</b> | 2.041                  | 8.217                |          |          |      | 7   |            | 8.5029   | AAL95273.1  Hypothetical protein                                                  |                         |    |    |   |   |   |   |
|               |                        |                      |          |          | 35   |     | 35.0000    |          |                                                                                   |                         |    |    |   |   |   |   |
| <b>FN1078</b> | 0.316                  | 15.414               | 5.335e-2 | 9.794e-2 | 195  | 142 | 267.1773   | 172.4883 | AAL95274.1  Hypothetical exported 24-amino acid repeat protein                    |                         |    |    |   |   |   |   |
|               |                        |                      |          |          | 199  | 154 | 199.0000   | 202.0180 |                                                                                   |                         |    |    |   |   |   |   |
| <b>FN1079</b> | 0.523                  | 18.003               | 1.197e-1 | 2.843e-1 | 267  | 364 | 365.8273   | 442.1531 | AAL95275.1  Neutrophil-activating protein A                                       |                         |    |    |   |   |   |   |
|               |                        |                      |          |          | 863  | 315 | 863.0000   | 413.2187 |                                                                                   |                         |    |    |   |   |   |   |
| <b>FN1080</b> | -0.972                 | 4.632                | 3.24e-3  | 2.504e-3 | 3    | 5   | 4.1104     | 6.0735   | AAL95276.1  Export ABC transporter                                                |                         |    |    |   |   |   |   |
|               |                        |                      |          |          | 3    | 6   | 3.0000     | 7.8708   |                                                                                   |                         |    |    |   |   |   |   |
| <b>FN1081</b> | -0.113                 | 10.309               |          |          | 25   | 34  | 34.2535    | 41.3000  | AAL95277.1  unknown                                                               |                         |    |    |   |   |   |   |
|               |                        |                      |          |          |      | 25  |            | 32.7951  |                                                                                   |                         |    |    |   |   |   |   |
| <b>FN1084</b> | -1.661                 | 11.727               | 1.27e-3  | 6.878e-4 | 31   | 97  | 42.4743    | 117.8265 | AAL95280.1  unknown                                                               |                         |    |    |   |   |   |   |
|               |                        |                      |          |          | 23   | 68  | 23.0000    | 89.2028  |                                                                                   |                         |    |    |   |   |   |   |
| <b>FN1085</b> | 1.380                  | 12.544               | 3.034e-3 | 2.278e-3 | 101  | 40  | 138.3841   | 48.5882  | AAL95281.1  4-methyl-5(B-hydroxyethyl)-thiazole monophosphate biosynthesis enzyme |                         |    |    |   |   |   |   |
|               |                        |                      |          |          | 111  | 36  | 111.0000   | 47.2250  |                                                                                   |                         |    |    |   |   |   |   |
| <b>FN1086</b> | -0.345                 | 5.960                |          |          |      | 6   |            | 7.2882   | AAL95282.1  Transporter                                                           |                         |    |    |   |   |   |   |
|               |                        |                      |          |          | 7    | 8   | 7.0000     | 10.4944  |                                                                                   |                         |    |    |   |   |   |   |
| <b>FN1088</b> | -0.324                 | 9.206                | 8.026e-2 | 1.707e-1 | 12   | 21  | 16.4417    | 25.5088  | AAL95284.1  NADH oxidase                                                          |                         |    |    |   |   |   |   |
|               |                        |                      |          |          | 27   | 22  | 27.0000    | 28.8597  |                                                                                   |                         |    |    |   |   |   |   |
| <b>FN1089</b> | 2.082                  | 12.161               | 1.92e-2  | 2.572e-2 | 69   | 25  | 94.5396    | 30.3677  | AAL95285.1  ATP-binding protein (contains P-loop)                                 |                         |    |    |   |   |   |   |
|               |                        |                      |          |          | 184  | 27  | 184.0000   | 35.4187  |                                                                                   |                         |    |    |   |   |   |   |
| <b>FN1091</b> | -1.787                 | 7.371                | 8.297e-4 | 3.461e-4 | 5    | 21  | 6.8507     | 25.5088  | AAL95287.1  Sigma factor sigB regulation protein rsbU                             |                         |    |    |   |   |   |   |
|               |                        |                      |          |          | 7    | 17  | 7.0000     | 22.3007  |                                                                                   |                         |    |    |   |   |   |   |
| <b>FN1092</b> | 0.197                  | 10.888               | 2.661e-1 | 8.086e-1 | 6    | 27  | 8.2208     | 32.7971  | AAL95288.1  Hypothetical protein                                                  |                         |    |    |   |   |   |   |
|               |                        |                      |          |          | 85   | 37  | 85.0000    | 48.5368  |                                                                                   |                         |    |    |   |   |   |   |
| <b>FN1093</b> | -1.444                 | 11.607               | 7.89e-4  | 3.171e-4 | 29   | 75  | 39.7341    | 91.1030  | AAL95289.1  Hypothetical protein                                                  |                         |    |    |   |   |   |   |
|               |                        |                      |          |          | 28   | 71  | 28.0000    | 93.1382  |                                                                                   |                         |    |    |   |   |   |   |
| <b>FN1094</b> |                        |                      |          |          |      |     |            |          | AAL95290.1  Dolichol-phosphate mannosyltransferase                                |                         |    |    |   |   |   |   |
|               |                        |                      |          |          | 33   |     | 33.0000    |          |                                                                                   |                         |    |    |   |   |   |   |
| <b>FN1095</b> |                        |                      |          |          |      |     |            |          | AAL95291.1  unknown                                                               |                         |    |    |   |   |   |   |
|               |                        |                      |          |          | 8    |     | 10.9611    |          |                                                                                   |                         |    |    |   |   |   |   |
| <b>FN1096</b> | -0.169                 | 10.967               | 2.421e-1 | 7.121e-1 | 47   | 36  | 64.3966    | 43.7294  | AAL95292.1  Hypothetical protein                                                  |                         |    |    |   |   |   |   |
|               |                        |                      |          |          | 20   | 39  | 20.0000    | 51.1604  |                                                                                   |                         |    |    |   |   |   |   |

Show detected proteins only  
 Show all proteins  
 Filter by category:

Proteins found: 1338

Enter (or paste) list of ORFs

Test Cutoff

| Signif | Direction | Applies To   |
|--------|-----------|--------------|
| yes    | +         | ratios, bars |
| no     | n/a       | bars         |
| yes    | -         | ratios, bars |
| yes    | +         | p-, q-Values |
| yes    | -         |              |

Fn Summary Table

FnPg vs Fn

FnSg vs Fn

FnPgSg vs Fn

FnPgSg vs FnPg

FnSg vs FnPg

FnPgSg vs FnSg

Fn Coverage

| Protein | FnPg vs Fn             |                      |          |          | Raw  |     | Normalized |          | Description                                         | Log <sub>2</sub> Ratios |    |    |   |   |   |   |
|---------|------------------------|----------------------|----------|----------|------|-----|------------|----------|-----------------------------------------------------|-------------------------|----|----|---|---|---|---|
|         | Log <sub>2</sub> Ratio | Log <sub>2</sub> Sum | q-Value  | p-Value  | FnPg | Fn  | FnPg       | Fn       |                                                     | -6                      | -4 | -2 | 0 | 2 | 4 | 6 |
| FN1097  | -1.064                 | 11.373               |          |          | 26   | 47  | 35.6236    | 57.0912  | AAL95293.1  Hypothetical protein                    |                         |    |    |   |   |   |   |
|         |                        |                      |          |          |      |     |            |          |                                                     |                         |    |    |   |   |   |   |
| FN1101  |                        |                      |          |          |      |     |            |          | AAL95297.1  ATPase                                  |                         |    |    |   |   |   |   |
|         |                        |                      |          |          |      |     |            |          |                                                     |                         |    |    |   |   |   |   |
| FN1102  |                        |                      |          |          |      |     |            |          | AAL95298.1  tRNA 2'phosphotransferase               |                         |    |    |   |   |   |   |
|         |                        |                      |          |          |      |     |            |          |                                                     |                         |    |    |   |   |   |   |
| FN1103  | -1.735                 | 11.758               | 2.231e-4 | 4.514e-5 | 23   | 85  | 31.5132    | 103.2500 | AAL95299.1  Excinuclease ABC subunit A              |                         |    |    |   |   |   |   |
|         |                        |                      |          |          |      |     |            |          |                                                     |                         |    |    |   |   |   |   |
| FN1105  | -0.290                 | 13.052               | 1.489e-1 | 3.76e-1  | 83   | 76  | 113.7216   | 92.3177  | AAL95301.1  Hypothetical protein                    |                         |    |    |   |   |   |   |
|         |                        |                      |          |          |      |     |            |          |                                                     |                         |    |    |   |   |   |   |
| FN1106  | -0.657                 | 12.631               | 1.085e-3 | 5.357e-4 | 51   | 88  | 69.8771    | 106.8941 | AAL95302.1  L-serine dehydratase                    |                         |    |    |   |   |   |   |
|         |                        |                      |          |          |      |     |            |          |                                                     |                         |    |    |   |   |   |   |
| FN1111  |                        |                      |          |          |      |     |            |          | AAL95307.1  Dipeptide-binding protein               |                         |    |    |   |   |   |   |
|         |                        |                      |          |          |      |     |            |          |                                                     |                         |    |    |   |   |   |   |
| FN1117  | -0.613                 | 10.930               | 8.015e-2 | 1.704e-1 | 39   | 37  | 53.4355    | 44.9441  | AAL95313.1  LSU ribosomal protein L21P              |                         |    |    |   |   |   |   |
|         |                        |                      |          |          |      |     |            |          |                                                     |                         |    |    |   |   |   |   |
| FN1119  | -0.859                 | 13.803               | 3.573e-2 | 5.682e-2 | 96   | 142 | 131.5334   | 172.4883 | AAL95315.1  LSU ribosomal protein L27P              |                         |    |    |   |   |   |   |
|         |                        |                      |          |          |      |     |            |          |                                                     |                         |    |    |   |   |   |   |
| FN1120  | 0.799                  | 15.297               | 6.978e-3 | 7.186e-3 | 166  | 109 | 227.4432   | 132.4030 | AAL95316.1  Phosphoenolpyruvate carboxykinase (ATP) |                         |    |    |   |   |   |   |
|         |                        |                      |          |          |      |     |            |          |                                                     |                         |    |    |   |   |   |   |
| FN1121  | -0.372                 | 12.103               | 4.579e-2 | 7.952e-2 | 34   | 67  | 46.5848    | 81.3853  | AAL95317.1  hypothetical cytosolic protein          |                         |    |    |   |   |   |   |
|         |                        |                      |          |          |      |     |            |          |                                                     |                         |    |    |   |   |   |   |
| FN1122  | -2.018                 | 13.763               | 2.365e-3 | 1.621e-3 | 41   | 219 | 56.1757    | 266.0207 | AAL95318.1  Long-chain-fatty-acid--CoA ligase       |                         |    |    |   |   |   |   |
|         |                        |                      |          |          |      |     |            |          |                                                     |                         |    |    |   |   |   |   |
| FN1123  | -2.046                 | 7.413                | 5.593e-5 | 5.847e-6 | 5    | 21  | 6.8507     | 25.5088  | AAL95319.1  Thioredoxin-like protein                |                         |    |    |   |   |   |   |
|         |                        |                      |          |          |      |     |            |          |                                                     |                         |    |    |   |   |   |   |
| FN1124  | -1.027                 | 16.457               | 1.293e-3 | 7.057e-4 | 133  | 356 | 182.2286   | 432.4354 | AAL95320.1  Outer membrane porin F                  |                         |    |    |   |   |   |   |
|         |                        |                      |          |          |      |     |            |          |                                                     |                         |    |    |   |   |   |   |
| FN1125  | 0.845                  | 11.386               | 1.311e-1 | 3.194e-1 | 18   | 29  | 24.6625    | 35.2265  | AAL95321.1  LemA protein                            |                         |    |    |   |   |   |   |
|         |                        |                      |          |          |      |     |            |          |                                                     |                         |    |    |   |   |   |   |
| FN1127  | 1.087                  | 11.860               | 2.91e-2  | 4.344e-2 | 83   | 30  | 113.7216   | 36.4412  | AAL95323.1  Hypothetical membrane-spanning protein  |                         |    |    |   |   |   |   |
|         |                        |                      |          |          |      |     |            |          |                                                     |                         |    |    |   |   |   |   |

Show detected proteins only  
 Show all proteins  
 Filter by category:

Proteins found:  
1338

Enter (or paste) list of ORFs

Find ORFs

Test Cutoff

q-Value

p-Value

.005

| Signif | Direction | Applies To   |
|--------|-----------|--------------|
| yes    | +         | ratios, bars |
| no     | n/a       | bars         |
| yes    | -         | ratios, bars |
| yes    | +         | p-, q-Values |
| yes    | -         | p-, q-Values |

Dot Plots

Fn Summary Table FnPg vs Fn FnSg vs Fn FnPgSg vs Fn FnPgSg vs FnPg FnSg vs FnPg FnPgSg vs FnSg Fn Coverage

| Protein | FnPg vs Fn             |                      |          |          | Raw  |     | Normalized |          | Description                                                    | Log <sub>2</sub> Ratios |    |    |   |   |   |   |
|---------|------------------------|----------------------|----------|----------|------|-----|------------|----------|----------------------------------------------------------------|-------------------------|----|----|---|---|---|---|
|         | Log <sub>2</sub> Ratio | Log <sub>2</sub> Sum | q-Value  | p-Value  | FnPg | Fn  | FnPg       | Fn       |                                                                | -6                      | -4 | -2 | 0 | 2 | 4 | 6 |
| FN1128  | 0.334                  | 16.075               | 1.092e-1 | 2.535e-1 | 270  | 193 | 369.9378   | 234.4383 | AAL95324.1  Acylamino-acid-releasing enzyme                    |                         |    |    |   |   |   |   |
|         |                        |                      |          |          | 220  | 178 | 220.0000   | 233.5013 |                                                                |                         |    |    |   |   |   |   |
| FN1129  | -1.843                 | 7.013                |          |          |      | 16  |            | 19.4353  | AAL95325.1  Chromosome partition protein smc                   |                         |    |    |   |   |   |   |
|         |                        |                      |          |          | 6    | 18  | 6.0000     | 23.6125  |                                                                |                         |    |    |   |   |   |   |
| FN1130  | -1.596                 | 6.239                |          |          |      | 13  |            | 15.7912  | AAL95326.1  Tetraacyldisaccharide 4'-kinase                    |                         |    |    |   |   |   |   |
|         |                        |                      |          |          | 5    | 11  | 5.0000     | 14.4299  |                                                                |                         |    |    |   |   |   |   |
| FN1131  | 0.502                  | 6.899                |          |          |      |     |            |          | AAL95327.1  Hypothetical protein                               |                         |    |    |   |   |   |   |
|         |                        |                      |          |          | 13   | 7   | 13.0000    | 9.1826   |                                                                |                         |    |    |   |   |   |   |
| FN1133  | 0.535                  | 10.186               | 1.525e-1 | 3.881e-1 | 14   | 24  | 19.1820    | 29.1529  | AAL95329.1  N-acetylglucosamine-6-phosphate deacetylase        |                         |    |    |   |   |   |   |
|         |                        |                      |          |          | 63   | 21  | 63.0000    | 27.5479  |                                                                |                         |    |    |   |   |   |   |
| FN1134  | -0.750                 | 10.293               | 1.882e-2 | 2.506e-2 | 26   | 40  | 35.6236    | 48.5882  | AAL95330.1  Hypothetical cytosolic protein                     |                         |    |    |   |   |   |   |
|         |                        |                      |          |          | 19   | 33  | 19.0000    | 43.2896  |                                                                |                         |    |    |   |   |   |   |
| FN1135  | 0.232                  | 15.087               | 2.28e-1  | 6.583e-1 | 225  | 142 | 308.2815   | 172.4883 | AAL95331.1  Phosphonates-binding protein                       |                         |    |    |   |   |   |   |
|         |                        |                      |          |          | 96   | 131 | 96.0000    | 171.8465 |                                                                |                         |    |    |   |   |   |   |
| FN1136  | 1.345                  | 7.825                |          |          |      | 8   |            | 9.7176   | AAL95332.1  Phosphonates transport ATP-binding protein phnC    |                         |    |    |   |   |   |   |
|         |                        |                      |          |          | 24   | 7   | 24.0000    | 9.1826   |                                                                |                         |    |    |   |   |   |   |
| FN1138  | -0.268                 | 18.871               | 1.05e-1  | 2.414e-1 | 349  | 644 | 478.1788   | 782.2708 | AAL95334.1  Hypothetical cytosolic protein                     |                         |    |    |   |   |   |   |
|         |                        |                      |          |          | 784  | 562 | 784.0000   | 737.2346 |                                                                |                         |    |    |   |   |   |   |
| FN1139  | 0.086                  | 12.492               | 2.847e-1 | 8.874e-1 | 20   | 63  | 27.4028    | 76.5265  | AAL95335.1  Activator of (R)-2-hydroxyglutaryl-CoA dehydratase |                         |    |    |   |   |   |   |
|         |                        |                      |          |          | 129  | 54  | 129.0000   | 70.8375  |                                                                |                         |    |    |   |   |   |   |
| FN1140  | 1.396                  | 7.892                |          |          |      | 7   |            | 8.5029   | AAL95336.1  hypothetical protein                               |                         |    |    |   |   |   |   |
|         |                        |                      |          |          | 25   | 8   | 25.0000    | 10.4944  |                                                                |                         |    |    |   |   |   |   |
| FN1142  | -1.475                 | 6.119                |          |          |      | 11  |            | 13.3618  | AAL95338.1  Oxygen-independent coproporphyrinogen III oxidase  |                         |    |    |   |   |   |   |
|         |                        |                      |          |          | 5    | 11  | 5.0000     | 14.4299  |                                                                |                         |    |    |   |   |   |   |
| FN1143  | 0.301                  | 13.417               | 2.046e-1 | 5.737e-1 | 41   | 72  | 56.1757    | 87.4588  | AAL95339.1  Glucosamine-6-phosphate isomerase                  |                         |    |    |   |   |   |   |
|         |                        |                      |          |          | 176  | 77  | 176.0000   | 101.0090 |                                                                |                         |    |    |   |   |   |   |
| FN1144  | -2.024                 | 13.841               | 1.351e-3 | 7.472e-4 | 22   | 210 | 30.1431    | 255.0883 | AAL95340.1  Hypothetical Exported Protein                      |                         |    |    |   |   |   |   |
|         |                        |                      |          |          | 90   | 178 | 90.0000    | 233.5013 |                                                                |                         |    |    |   |   |   |   |
| FN1145  | -0.160                 | 8.872                | 2.423e-1 | 7.13e-1  | 8    | 15  | 10.9611    | 18.2206  | AAL95341.1  Oligoendopeptidase F                               |                         |    |    |   |   |   |   |
|         |                        |                      |          |          | 30   | 21  | 30.0000    | 27.5479  |                                                                |                         |    |    |   |   |   |   |
| FN1146  | -1.752                 | 7.831                |          |          | 6    | 24  | 8.2208     | 29.1529  | AAL95342.1  Hypothetical exported 24-amino acid repeat protein |                         |    |    |   |   |   |   |
|         |                        |                      |          |          |      | 20  |            | 26.2361  |                                                                |                         |    |    |   |   |   |   |

Show detected proteins only  
 Show all proteins  
 Filter by category:

Proteins found: 1338

Enter (or paste) list of ORFs

Find ORFs

Test Cutoff

q-Value .005

p-Value

| Signif | Direction | Applies To   |
|--------|-----------|--------------|
| yes    | +         | ratios, bars |
| no     | n/a       | bars         |
| yes    | -         | ratios, bars |
| yes    | +         | p-, q-Values |
| yes    | -         |              |

Dot Plots Dot Plots

Fn Summary Table FnPg vs Fn FnSg vs Fn FnPgSg vs Fn FnPgSg vs FnPg FnSg vs FnPg FnPgSg vs FnSg Fn Coverage

| Protein | FnPg vs Fn             |                      |          |          | Raw  |      | Normalized |           | Description                                   | Log <sub>2</sub> Ratios |    |    |   |   |   |   |
|---------|------------------------|----------------------|----------|----------|------|------|------------|-----------|-----------------------------------------------|-------------------------|----|----|---|---|---|---|
|         | Log <sub>2</sub> Ratio | Log <sub>2</sub> Sum | q-Value  | p-Value  | FnPg | Fn   | FnPg       | Fn        |                                               | -6                      | -4 | -2 | 0 | 2 | 4 | 6 |
| FN1147  |                        |                      |          |          |      | 20   |            | 24.2941   | AAL95343.1  Hypothetical protein              |                         |    |    |   |   |   |   |
|         |                        |                      |          |          |      | 17   |            | 22.3007   |                                               |                         |    |    |   |   |   |   |
| FN1148  | 0.121                  | 11.123               | 2.843e-1 | 8.857e-1 | 4    | 40   | 5.4806     | 48.5882   | AAL95344.1  Serine/threonine sodium symporter |                         |    |    |   |   |   |   |
|         |                        |                      |          |          | 93   | 32   | 93.0000    | 41.9778   |                                               |                         |    |    |   |   |   |   |
| FN1149  | -0.897                 | 7.170                | 1.237e-4 | 1.925e-5 | 7    | 14   | 9.5910     | 17.0059   | AAL95345.1  ATP-dependent nuclease subunit A  |                         |    |    |   |   |   |   |
|         |                        |                      |          |          | 8    | 12   | 8.0000     | 15.7417   |                                               |                         |    |    |   |   |   |   |
| FN1150  | -1.199                 | 5.199                |          |          |      |      |            |           | AAL95346.1  unknown                           |                         |    |    |   |   |   |   |
|         |                        |                      |          |          | 4    | 7    | 4.0000     | 9.1826    |                                               |                         |    |    |   |   |   |   |
| FN1152  | -0.607                 | 13.861               | 5.176e-2 | 9.389e-2 | 45   | 128  | 61.6563    | 155.4824  | AAL95348.1  Aspartate aminotransferase        |                         |    |    |   |   |   |   |
|         |                        |                      |          |          | 136  | 111  | 136.0000   | 145.6104  |                                               |                         |    |    |   |   |   |   |
| FN1153  |                        |                      |          |          |      |      |            |           | AAL95349.1  Hypothetical protein              |                         |    |    |   |   |   |   |
|         |                        |                      |          |          |      | 36   |            | 43.7294   |                                               |                         |    |    |   |   |   |   |
| FN1154  | 1.123                  | 7.521                |          |          |      |      |            |           | AAL95350.1  Ribonuclease BN                   |                         |    |    |   |   |   |   |
|         |                        |                      |          |          | 20   | 7    | 20.0000    | 9.1826    |                                               |                         |    |    |   |   |   |   |
| FN1155  |                        |                      |          |          |      |      |            |           | AAL95351.1  Cell division protein ftsI        |                         |    |    |   |   |   |   |
|         |                        |                      |          |          |      | 7    |            | 8.5029    |                                               |                         |    |    |   |   |   |   |
| FN1157  |                        |                      |          |          |      |      |            |           | AAL95353.1  Polypeptide deformylase           |                         |    |    |   |   |   |   |
|         |                        |                      |          |          |      | 11   |            | 14.4299   |                                               |                         |    |    |   |   |   |   |
| FN1159  | 0.507                  | 13.609               | 4.817e-2 | 8.513e-2 |      |      |            |           | AAL95355.1  Fructose-1,6-bisphosphatase       |                         |    |    |   |   |   |   |
|         |                        |                      |          |          | 77   | 68   | 105.5008   | 82.6000   |                                               |                         |    |    |   |   |   |   |
| FN1160  | -1.457                 | 4.627                |          |          |      |      |            |           | AAL95356.1  SWF/SNF family helicase           |                         |    |    |   |   |   |   |
|         |                        |                      |          |          | 3    | 7    | 3.0000     | 9.1826    |                                               |                         |    |    |   |   |   |   |
| FN1161  | -2.264                 | 5.434                |          |          |      |      |            |           | AAL95357.1  Glutamate racemase                |                         |    |    |   |   |   |   |
|         |                        |                      |          |          |      | 14   |            | 17.0059   |                                               |                         |    |    |   |   |   |   |
| FN1162  | 1.679                  | 7.106                |          |          |      |      |            |           | AAL95358.1  Hydroxyacylglutathione hydrolase  |                         |    |    |   |   |   |   |
|         |                        |                      |          |          | 3    | 9    | 3.0000     | 11.8062   |                                               |                         |    |    |   |   |   |   |
| FN1163  | 0.016                  | 11.964               | 3.015e-1 | 9.621e-1 |      |      |            |           | AAL95359.1  Thioredoxin reductase             |                         |    |    |   |   |   |   |
|         |                        |                      |          |          | 21   | 5    | 21.0000    | 6.5590    |                                               |                         |    |    |   |   |   |   |
| FN1164  | -1.042                 | 7.626                | 4.611e-5 | 4.151e-6 | 30   | 56   | 41.1042    | 68.0235   | AAL95360.1  Glucokinase                       |                         |    |    |   |   |   |   |
|         |                        |                      |          |          | 86   | 44   | 86.0000    | 57.7194   |                                               |                         |    |    |   |   |   |   |
| FN1165  | -0.474                 | 23.494               | 3.39e-4  | 8.379e-5 | 7    | 17   | 9.5910     | 20.6500   | AAL95361.1  D-galactose-binding protein       |                         |    |    |   |   |   |   |
|         |                        |                      |          |          | 10   | 15   | 10.0000    | 19.6771   |                                               |                         |    |    |   |   |   |   |
| FN1165  |                        |                      |          |          | 2224 | 3391 | 3047.1910  | 4119.0688 | AAL95361.1  D-galactose-binding protein       |                         |    |    |   |   |   |   |
|         |                        |                      |          |          | 2786 | 3036 | 2786.0000  | 3982.6408 |                                               |                         |    |    |   |   |   |   |

Show detected proteins only  
 Show all proteins  
 Filter by category:

Proteins found: 1338

Test Cutoff

| Signif | Direction | Applies To   |
|--------|-----------|--------------|
| yes    | +         | ratios, bars |
| no     | n/a       | bars         |
| yes    | -         | ratios, bars |
| yes    | +         | p-, q-Values |
| yes    | -         |              |

Fn Summary Table

FnPg vs Fn

FnSg vs Fn

FnPgSg vs Fn

FnPgSg vs FnPg

FnSg vs FnPg

FnPgSg vs FnSg

Fn Coverage

| Protein | FnPg vs Fn             |                      |          |          | Raw  |      | Normalized |           | Description                                                    | Log <sub>2</sub> Ratios |    |    |   |   |   |   |
|---------|------------------------|----------------------|----------|----------|------|------|------------|-----------|----------------------------------------------------------------|-------------------------|----|----|---|---|---|---|
|         | Log <sub>2</sub> Ratio | Log <sub>2</sub> Sum | q-Value  | p-Value  | FnPg | Fn   | FnPg       | Fn        |                                                                | -6                      | -4 | -2 | 0 | 2 | 4 | 6 |
| FN1166  | -0.484                 | 15.297               | 6.935e-3 | 7.123e-3 | 128  | 179  | 175.3779   | 217.4324  | AAL95362.1  Galactoside transport ATP-binding protein mgIA     |                         |    |    |   |   |   |   |
|         |                        |                      |          |          | 164  | 196  | 164.0000   | 257.1138  |                                                                |                         |    |    |   |   |   |   |
| FN1167  |                        |                      |          |          |      | 52   |            | 63.1647   | AAL95363.1  Galactoside transport system permease protein mgIC |                         |    |    |   |   |   |   |
|         |                        |                      |          |          |      | 17   |            | 22.3007   |                                                                |                         |    |    |   |   |   |   |
| FN1169  | -0.356                 | 16.815               | 4.448e-2 | 7.633e-2 | 260  | 330  | 356.2364   | 400.8531  | AAL95365.1  L-lactate dehydrogenase                            |                         |    |    |   |   |   |   |
|         |                        |                      |          |          | 244  | 280  | 244.0000   | 367.3055  |                                                                |                         |    |    |   |   |   |   |
| FN1170  | 0.506                  | 25.229               | 7.054e-2 | 1.441e-1 | 6878 | 4375 | 9423.8219  | 5314.3397 | AAL95366.1  Pyruvate-flavodoxin oxidoreductase                 |                         |    |    |   |   |   |   |
|         |                        |                      |          |          | 5525 | 3972 | 5525.0000  | 5210.4906 |                                                                |                         |    |    |   |   |   |   |
| FN1171  | 0.209                  | 19.881               | 1.436e-1 | 3.589e-1 | 936  | 793  | 1282.4509  | 963.2620  | AAL95367.1  Acetate kinase                                     |                         |    |    |   |   |   |   |
|         |                        |                      |          |          | 830  | 659  | 830.0000   | 864.4797  |                                                                |                         |    |    |   |   |   |   |
| FN1172  | -0.630                 | 18.578               | 1.192e-4 | 1.8e-5   | 348  | 627  | 476.8087   | 761.6208  | AAL95368.1  Phosphate acetyltransferase                        |                         |    |    |   |   |   |   |
|         |                        |                      |          |          | 529  | 606  | 529.0000   | 794.9540  |                                                                |                         |    |    |   |   |   |   |
| FN1176  |                        |                      |          |          | 4    |      | 5.4806     |           | AAL95372.1  Hypothetical cytosolic protein                     |                         |    |    |   |   |   |   |
| FN1179  | 1.870                  | 6.653                |          |          | 14   |      | 19.1820    |           | AAL95375.1  ATP-dependent RNA helicase                         |                         |    |    |   |   |   |   |
|         |                        |                      |          |          |      | 4    | 5.2472     |           |                                                                |                         |    |    |   |   |   |   |
| FN1180  | 0.361                  | 7.191                |          |          | 10   | 10   | 13.7014    | 12.1471   | AAL95376.1  Hypothetical protein                               |                         |    |    |   |   |   |   |
|         |                        |                      |          |          |      | 7    | 9.1826     |           |                                                                |                         |    |    |   |   |   |   |
| FN1181  | 1.353                  | 15.098               | 1.258e-1 | 3.03e-1  | 404  | 99   | 553.5365   | 120.2559  | AAL95377.1  unknown                                            |                         |    |    |   |   |   |   |
|         |                        |                      |          |          | 45   | 87   | 45.0000    | 114.1271  |                                                                |                         |    |    |   |   |   |   |
| FN1182  | 0.348                  | 7.204                |          |          | 10   | 8    | 13.7014    | 9.7176    | AAL95378.1  Hypothetical protein                               |                         |    |    |   |   |   |   |
|         |                        |                      |          |          |      | 9    | 11.8062    |           |                                                                |                         |    |    |   |   |   |   |
| FN1183  | 1.050                  | 6.875                | 1.941e-2 | 2.608e-2 | 14   | 7    | 19.1820    | 8.5029    | AAL95379.1  Hypothetical cytosolic protein                     |                         |    |    |   |   |   |   |
|         |                        |                      |          |          | 12   | 5    | 12.0000    | 6.5590    |                                                                |                         |    |    |   |   |   |   |
| FN1184  |                        |                      |          |          | 4    |      | 5.4806     |           | AAL95380.1  Hypothetical protein                               |                         |    |    |   |   |   |   |
| FN1185  | 0.578                  | 10.599               | 1.313e-1 | 3.2e-1   | 52   | 25   | 71.2473    | 30.3677   | AAL95381.1  SIR2 family protein                                |                         |    |    |   |   |   |   |
|         |                        |                      |          |          | 25   | 26   | 25.0000    | 34.1069   |                                                                |                         |    |    |   |   |   |   |
| FN1186  | 4.221                  | 12.526               | 4.992e-2 | 8.934e-2 | 82   | 12   | 112.3515   | 14.5765   | AAL95382.1  Amidohydrolase                                     |                         |    |    |   |   |   |   |
|         |                        |                      |          |          | 551  | 16   | 551.0000   | 20.9889   |                                                                |                         |    |    |   |   |   |   |
| FN1187  |                        |                      |          |          | 7    |      | 9.5910     |           | AAL95383.1  Amino acid-binding protein                         |                         |    |    |   |   |   |   |
|         |                        |                      |          |          | 93   |      | 93.0000    |           |                                                                |                         |    |    |   |   |   |   |

Show detected proteins only  
 Show all proteins  
 Filter by category:

Proteins found: 1338

Enter (or paste) list of ORFs

Find ORFs

Test Cutoff

q-Value .005

p-Value

| Signif | Direction | Applies To   |
|--------|-----------|--------------|
| yes    | +         | ratios, bars |
| no     | n/a       | bars         |
| yes    | -         | ratios, bars |
| yes    | +         | p-, q-Values |
| yes    | -         |              |

Dot Plots Dot Plots

Fn Summary Table FnPg vs Fn FnSg vs Fn FnPgSg vs Fn FnPgSg vs FnPg FnSg vs FnPg FnPgSg vs FnSg Fn Coverage

| Protein | FnPg vs Fn             |                      |          |          | Raw  |     | Normalized |          | Description                                      | Log <sub>2</sub> Ratios |    |    |   |   |   |   |
|---------|------------------------|----------------------|----------|----------|------|-----|------------|----------|--------------------------------------------------|-------------------------|----|----|---|---|---|---|
|         | Log <sub>2</sub> Ratio | Log <sub>2</sub> Sum | q-Value  | p-Value  | FnPg | Fn  | FnPg       | Fn       |                                                  | -6                      | -4 | -2 | 0 | 2 | 4 | 6 |
| FN1188  | -0.936                 | 11.845               | 5.604e-2 | 1.05e-1  | 10   | 69  | 13.7014    | 83.8147  | AAL95384.1  Hypothetical protein                 |                         |    |    |   |   |   |   |
|         |                        |                      |          |          | 74   | 64  | 74.0000    | 83.9555  |                                                  |                         |    |    |   |   |   |   |
| FN1189  | -0.482                 | 12.482               | 1.891e-3 | 1.186e-3 | 46   | 77  | 63.0264    | 93.5324  | AAL95385.1  Hypothetical protein                 |                         |    |    |   |   |   |   |
|         |                        |                      |          |          | 65   | 65  | 65.0000    | 85.2673  |                                                  |                         |    |    |   |   |   |   |
| FN1190  | -0.937                 | 13.526               | 2.184e-5 | 1.409e-6 | 54   | 121 | 73.9876    | 146.9795 | AAL95386.1  Probable cadmium-transporting ATPase |                         |    |    |   |   |   |   |
|         |                        |                      |          |          | 83   | 117 | 83.0000    | 153.4812 |                                                  |                         |    |    |   |   |   |   |
| FN1191  | 0.044                  | 10.940               |          |          |      | 33  |            | 40.0853  | AAL95387.1  unknown                              |                         |    |    |   |   |   |   |
|         |                        |                      |          |          | 45   | 36  | 45.0000    | 47.2250  |                                                  |                         |    |    |   |   |   |   |
| FN1192  | 0.086                  | 16.985               | 2.075e-1 | 5.839e-1 | 227  | 298 | 311.0217   | 361.9825 | AAL95388.1  unknown                              |                         |    |    |   |   |   |   |
|         |                        |                      |          |          | 431  | 257 | 431.0000   | 337.1340 |                                                  |                         |    |    |   |   |   |   |
| FN1198  | 0.382                  | 9.619                | 6.09e-2  | 1.185e-1 | 19   | 21  | 26.0327    | 25.5088  | AAL95394.1  Transporter                          |                         |    |    |   |   |   |   |
|         |                        |                      |          |          | 38   | 18  | 38.0000    | 23.6125  |                                                  |                         |    |    |   |   |   |   |
| FN1200  |                        |                      |          |          |      |     |            |          | AAL95396.1  Hypothetical protein                 |                         |    |    |   |   |   |   |
|         |                        |                      |          |          | 456  |     | 456.0000   |          |                                                  |                         |    |    |   |   |   |   |
| FN1202  | 1.492                  | 8.053                |          |          | 18   | 8   | 24.6625    | 9.7176   | AAL95398.1  NH(3)-dependent NAD(+) synthetase    |                         |    |    |   |   |   |   |
|         |                        |                      |          |          | 30   |     | 30.0000    |          |                                                  |                         |    |    |   |   |   |   |
| FN1203  | -0.717                 | 6.710                |          |          | 8    |     | 10.9611    |          | AAL95399.1  GTP-binding protein                  |                         |    |    |   |   |   |   |
|         |                        |                      |          |          | 5    | 10  | 5.0000     | 13.1181  |                                                  |                         |    |    |   |   |   |   |
| FN1204  | 0.388                  | 7.090                | 7.563e-2 | 1.577e-1 | 10   | 6   | 13.7014    | 7.2882   | AAL95400.1  Methyltransferase                    |                         |    |    |   |   |   |   |
|         |                        |                      |          |          | 13   | 10  | 13.0000    | 13.1181  |                                                  |                         |    |    |   |   |   |   |
| FN1205  | -0.683                 | 12.230               | 6.338e-2 | 1.254e-1 | 20   | 69  | 27.4028    | 83.8147  | AAL95401.1  Protease                             |                         |    |    |   |   |   |   |
|         |                        |                      |          |          | 82   | 70  | 82.0000    | 91.8264  |                                                  |                         |    |    |   |   |   |   |
| FN1206  |                        |                      |          |          |      |     |            |          | AAL95402.1  Hemolysin                            |                         |    |    |   |   |   |   |
|         |                        |                      |          |          |      | 8   |            | 10.4944  |                                                  |                         |    |    |   |   |   |   |
| FN1208  | -0.395                 | 6.435                | 3.627e-2 | 5.794e-2 | 6    | 10  | 8.2208     | 12.1471  | AAL95404.1  1-deoxyxylulose-5-phosphate synthase |                         |    |    |   |   |   |   |
|         |                        |                      |          |          | 8    | 7   | 8.0000     | 9.1826   |                                                  |                         |    |    |   |   |   |   |
| FN1209  | -2.359                 | 10.173               |          |          |      | 77  |            | 93.5324  | AAL95405.1  Hypothetical RNA binding protein     |                         |    |    |   |   |   |   |
|         |                        |                      |          |          | 15   | 46  | 15.0000    | 60.3430  |                                                  |                         |    |    |   |   |   |   |
| FN1210  | -1.499                 | 11.414               | 1.487e-2 | 1.838e-2 | 22   | 55  | 30.1431    | 66.8088  | AAL95406.1  Metal dependent hydrolase            |                         |    |    |   |   |   |   |
|         |                        |                      |          |          | 32   | 83  | 32.0000    | 108.8798 |                                                  |                         |    |    |   |   |   |   |
| FN1211  | -1.699                 | 7.067                | 5.425e-4 | 1.742e-4 | 5    | 16  | 6.8507     | 19.4353  | AAL95407.1  Cell division protein ftsI           |                         |    |    |   |   |   |   |
|         |                        |                      |          |          | 6    | 17  | 6.0000     | 22.3007  |                                                  |                         |    |    |   |   |   |   |

Show detected proteins only  
 Show all proteins  
 Filter by category:

Proteins found: 1338

Test Cutoff

| Signif | Direction | Applies To   |
|--------|-----------|--------------|
| yes    | +         | ratios, bars |
| no     | n/a       | bars         |
| yes    | -         | ratios, bars |
| yes    | +         | p-, q-Values |
| yes    | -         |              |



Fn Summary Table

FnPg vs Fn

FnSg vs Fn

FnPgSg vs Fn

FnPgSg vs FnPg

FnSg vs FnPg

FnPgSg vs FnSg

Fn Coverage

| Protein | FnPg vs Fn             |                      |          |          | Raw  |     | Normalized |          | Description                                                                     | Log <sub>2</sub> Ratios |    |    |   |   |   |   |
|---------|------------------------|----------------------|----------|----------|------|-----|------------|----------|---------------------------------------------------------------------------------|-------------------------|----|----|---|---|---|---|
|         | Log <sub>2</sub> Ratio | Log <sub>2</sub> Sum | q-Value  | p-Value  | FnPg | Fn  | FnPg       | Fn       |                                                                                 | -6                      | -4 | -2 | 0 | 2 | 4 | 6 |
| FN1213  | -1.264                 | 11.300               | 7.2e-3   | 7.517e-3 | 13   | 59  | 17.8118    | 71.6677  | AAL95409.1  Hypothetical protein                                                |                         |    |    |   |   |   |   |
|         |                        |                      |          |          | 47   | 64  | 47.0000    | 83.9555  |                                                                                 |                         |    |    |   |   |   |   |
| FN1216  | -1.368                 | 8.377                | 1.593e-2 | 2.007e-2 | 10   | 18  | 13.7014    | 21.8647  | AAL95412.1  RRF2 family protein                                                 |                         |    |    |   |   |   |   |
|         |                        |                      |          |          | 9    | 28  | 9.0000     | 36.7305  |                                                                                 |                         |    |    |   |   |   |   |
| FN1217  | -1.747                 | 7.361                |          |          |      | 16  |            | 19.4353  | AAL95413.1  Holliday junction DNA helicase ruvB                                 |                         |    |    |   |   |   |   |
|         |                        |                      |          |          | 7    | 21  | 7.0000     | 27.5479  |                                                                                 |                         |    |    |   |   |   |   |
| FN1218  |                        |                      |          |          |      |     |            |          | AAL95414.1  unknown                                                             |                         |    |    |   |   |   |   |
|         |                        |                      |          |          | 13   |     | 13.0000    |          |                                                                                 |                         |    |    |   |   |   |   |
| FN1219  | 0.350                  | 7.953                | 5.396e-2 | 9.952e-2 | 15   | 10  | 20.5521    | 12.1471  | AAL95415.1  Hypothetical protein                                                |                         |    |    |   |   |   |   |
|         |                        |                      |          |          | 15   | 12  | 15.0000    | 15.7417  |                                                                                 |                         |    |    |   |   |   |   |
| FN1220  | -0.155                 | 15.303               | 5.815e-2 | 1.107e-1 | 127  | 183 | 174.0078   | 222.2912 | AAL95416.1  Cysteine synthase                                                   |                         |    |    |   |   |   |   |
|         |                        |                      |          |          | 207  | 154 | 207.0000   | 202.0180 |                                                                                 |                         |    |    |   |   |   |   |
| FN1221  | 0.131                  | 8.428                | 2.718e-1 | 8.321e-1 | 5    | 13  | 6.8507     | 15.7912  | AAL95417.1  Hypothetical protein                                                |                         |    |    |   |   |   |   |
|         |                        |                      |          |          | 32   | 15  | 32.0000    | 19.6771  |                                                                                 |                         |    |    |   |   |   |   |
| FN1222  | -1.403                 | 8.987                | 3.455e-4 | 8.614e-5 | 10   | 29  | 13.7014    | 35.2265  | AAL95418.1  Hypothetical protein                                                |                         |    |    |   |   |   |   |
|         |                        |                      |          |          | 14   | 29  | 14.0000    | 38.0424  |                                                                                 |                         |    |    |   |   |   |   |
| FN1223  | 0.428                  | 12.381               | 5.721e-2 | 1.081e-1 | 74   | 54  | 101.3903   | 65.5941  | AAL95419.1  Oxygen-insensitive NAD(P)H nitroreductase                           |                         |    |    |   |   |   |   |
|         |                        |                      |          |          | 68   | 46  | 68.0000    | 60.3430  |                                                                                 |                         |    |    |   |   |   |   |
| FN1224  | -0.623                 | 13.846               | 5.546e-2 | 1.034e-1 | 42   | 113 | 57.5459    | 137.2618 | AAL95420.1  2-dehydro-3-deoxyphosphooctonate aldolase                           |                         |    |    |   |   |   |   |
|         |                        |                      |          |          | 138  | 125 | 138.0000   | 163.9757 |                                                                                 |                         |    |    |   |   |   |   |
| FN1225  | -0.240                 | 13.494               | 1.81e-1  | 4.893e-1 | 45   | 82  | 61.6563    | 99.6059  | AAL95421.1  UDP-N-acetylmuramoyl-L-alanyl-D-glutamate--meso-lanithionine ligase |                         |    |    |   |   |   |   |
|         |                        |                      |          |          | 136  | 102 | 136.0000   | 133.8041 |                                                                                 |                         |    |    |   |   |   |   |
| FN1226  | -1.125                 | 13.443               | 2.289e-2 | 3.208e-2 | 24   | 127 | 32.8834    | 154.2677 | AAL95422.1  Uracil-DNA glycosylase                                              |                         |    |    |   |   |   |   |
|         |                        |                      |          |          | 110  | 120 | 110.0000   | 157.4166 |                                                                                 |                         |    |    |   |   |   |   |
| FN1229  |                        |                      |          |          |      | 5   |            | 6.0735   | AAL95425.1  Hypothetical protein                                                |                         |    |    |   |   |   |   |
|         |                        |                      |          |          |      | 7   |            | 9.1826   |                                                                                 |                         |    |    |   |   |   |   |
| FN1230  |                        |                      |          |          |      | 50  |            | 60.7353  | AAL95426.1  Hypothetical cytosolic protein                                      |                         |    |    |   |   |   |   |
|         |                        |                      |          |          |      | 43  |            | 56.4076  |                                                                                 |                         |    |    |   |   |   |   |
| FN1231  | 0.451                  | 18.536               | 1.967e-1 | 5.46e-1  | 166  | 431 | 227.4432   | 523.5384 | AAL95427.1  Inosine-5'-monophosphate dehydrogenase                              |                         |    |    |   |   |   |   |
|         |                        |                      |          |          | 1214 | 405 | 1214.0000  | 531.2811 |                                                                                 |                         |    |    |   |   |   |   |
| FN1233  |                        |                      |          |          |      | 3   |            | 3.6441   | AAL95429.1  Putative NAD(P)H oxidoreductase                                     |                         |    |    |   |   |   |   |
|         |                        |                      |          |          |      | 4   |            | 5.2472   |                                                                                 |                         |    |    |   |   |   |   |

Show detected proteins only  
 Show all proteins  
 Filter by category:

Proteins found:  
1338

Test Cutoff

| Signif | Direction | Applies To   |
|--------|-----------|--------------|
| yes    | +         | ratios, bars |
| no     | n/a       | bars         |
| yes    | -         | ratios, bars |
| yes    | +         | p-, q-Values |
| yes    | -         |              |

Fn Summary Table FnPg vs Fn FnSg vs Fn FnPgSg vs Fn FnPgSg vs FnPg FnSg vs FnPg FnPgSg vs FnSg Fn Coverage

| Protein | FnPg vs Fn             |                      |          |          | Raw  |    | Normalized |         | Description                                                   | Log <sub>2</sub> Ratios |    |    |   |   |   |   |
|---------|------------------------|----------------------|----------|----------|------|----|------------|---------|---------------------------------------------------------------|-------------------------|----|----|---|---|---|---|
|         | Log <sub>2</sub> Ratio | Log <sub>2</sub> Sum | q-Value  | p-Value  | FnPg | Fn | FnPg       | Fn      |                                                               | -6                      | -4 | -2 | 0 | 2 | 4 | 6 |
| FN1234  |                        |                      |          |          |      | 15 |            | 18.2206 | AAL95430.1  Hypothetical protein                              |                         |    |    |   |   |   |   |
|         |                        |                      |          |          |      | 13 |            | 17.0535 |                                                               |                         |    |    |   |   |   |   |
| FN1235  | 1.403                  | 7.579                |          |          | 8    | 7  | 10.9611    | 8.5029  | AAL95431.1  Ankyrin repeat proteins                           |                         |    |    |   |   |   |   |
|         |                        |                      |          |          | 34   |    | 34.0000    |         |                                                               |                         |    |    |   |   |   |   |
| FN1237  | 1.575                  | 10.956               | 1.626e-3 | 9.569e-4 | 51   | 22 | 69.8771    | 26.7235 | AAL95433.1  Choline kinase                                    |                         |    |    |   |   |   |   |
|         |                        |                      |          |          | 84   | 19 | 84.0000    | 24.9243 |                                                               |                         |    |    |   |   |   |   |
| FN1238  |                        |                      |          |          |      |    |            |         | AAL95434.1  Hypothetical protein                              |                         |    |    |   |   |   |   |
|         |                        |                      |          |          | 5    |    | 5.0000     |         |                                                               |                         |    |    |   |   |   |   |
| FN1239  |                        |                      |          |          |      |    |            |         | AAL95435.1  Hypothetical protein                              |                         |    |    |   |   |   |   |
|         |                        |                      |          |          | 12   |    | 12.0000    |         |                                                               |                         |    |    |   |   |   |   |
| FN1240  | -1.829                 | 8.757                | 4.347e-4 | 1.226e-4 | 11   | 30 | 15.0715    | 36.4412 | AAL95436.1  Lipopolysaccharide core biosynthesis protein rfaY |                         |    |    |   |   |   |   |
|         |                        |                      |          |          | 7    | 32 | 7.0000     | 41.9778 |                                                               |                         |    |    |   |   |   |   |
| FN1241  | -0.139                 | 5.668                | 2.521e-1 | 7.514e-1 | 7    | 8  | 9.5910     | 9.7176  | AAL95437.1  polysaccharide biosynthesis protein               |                         |    |    |   |   |   |   |
|         |                        |                      |          |          | 4    | 4  | 4.0000     | 5.2472  |                                                               |                         |    |    |   |   |   |   |
| FN1242  | 0.657                  | 7.683                |          |          |      | 8  |            | 9.7176  | AAL95438.1  Polysaccharide deacetylase                        |                         |    |    |   |   |   |   |
|         |                        |                      |          |          | 18   | 10 | 18.0000    | 13.1181 |                                                               |                         |    |    |   |   |   |   |
| FN1243  | 0.021                  | 7.594                |          |          |      | 13 |            | 15.7912 | AAL95439.1  Glycosyl transferase                              |                         |    |    |   |   |   |   |
|         |                        |                      |          |          | 14   | 9  | 14.0000    | 11.8062 |                                                               |                         |    |    |   |   |   |   |
| FN1244  | 0.587                  | 8.322                | 1.743e-1 | 4.643e-1 | 5    | 10 | 6.8507     | 12.1471 | AAL95440.1  Polysaccharide deacetylase                        |                         |    |    |   |   |   |   |
|         |                        |                      |          |          | 37   | 13 | 37.0000    | 17.0535 |                                                               |                         |    |    |   |   |   |   |
| FN1245  | -2.175                 | 6.550                | 1.589e-2 | 2.001e-2 | 3    | 22 | 4.1104     | 26.7235 | AAL95441.1  Glycosyl transferase                              |                         |    |    |   |   |   |   |
|         |                        |                      |          |          | 5    | 11 | 5.0000     | 14.4299 |                                                               |                         |    |    |   |   |   |   |
| FN1246  | -0.372                 | 8.186                |          |          |      | 19 |            | 23.0794 | AAL95442.1  Lipooligosaccharide cholinephosphotransferase     |                         |    |    |   |   |   |   |
|         |                        |                      |          |          | 15   | 12 | 15.0000    | 15.7417 |                                                               |                         |    |    |   |   |   |   |
| FN1247  | -0.619                 | 8.705                | 3.85e-2  | 6.267e-2 | 8    | 19 | 10.9611    | 23.0794 | AAL95443.1  LOS biosynthesis enzyme LBGB                      |                         |    |    |   |   |   |   |
|         |                        |                      |          |          | 22   | 21 | 22.0000    | 27.5479 |                                                               |                         |    |    |   |   |   |   |
| FN1248  |                        |                      |          |          |      | 5  |            | 6.0735  | AAL95444.1  Hypothetical cytosolic protein                    |                         |    |    |   |   |   |   |
|         |                        |                      |          |          |      |    |            |         |                                                               |                         |    |    |   |   |   |   |
| FN1250  | -1.376                 | 9.925                | 1.084e-3 | 5.351e-4 | 10   | 46 | 13.7014    | 55.8765 | AAL95446.1  Guanine-hypoxanthine permease                     |                         |    |    |   |   |   |   |
|         |                        |                      |          |          | 25   | 34 | 25.0000    | 44.6014 |                                                               |                         |    |    |   |   |   |   |
| FN1251  | -0.530                 | 6.145                |          |          |      | 8  |            | 9.7176  | AAL95447.1  High-affinity iron permease                       |                         |    |    |   |   |   |   |
|         |                        |                      |          |          | 7    | 8  | 7.0000     | 10.4944 |                                                               |                         |    |    |   |   |   |   |

Show detected proteins only  
 Show all proteins  
 Filter by category:

Proteins found: 1338

Test Cutoff

| Signif | Direction | Applies To   |
|--------|-----------|--------------|
| yes    | +         | ratios, bars |
| no     | n/a       | bars         |
| yes    | -         | ratios, bars |
| yes    | +         | p-, q-Values |
| yes    | -         |              |

Fn Summary Table FnPg vs Fn FnSg vs Fn FnPgSg vs Fn FnPgSg vs FnPg FnSg vs FnPg FnPgSg vs FnSg Fn Coverage

| Protein | FnPg vs Fn             |                      |          |          | Raw  |      | Normalized |           | Description                                              | Log <sub>2</sub> Ratios |    |    |   |   |   |   |
|---------|------------------------|----------------------|----------|----------|------|------|------------|-----------|----------------------------------------------------------|-------------------------|----|----|---|---|---|---|
|         | Log <sub>2</sub> Ratio | Log <sub>2</sub> Sum | q-Value  | p-Value  | FnPg | Fn   | FnPg       | Fn        |                                                          | -6                      | -4 | -2 | 0 | 2 | 4 | 6 |
| FN1252  | -1.973                 | 17.489               | 1.155e-3 | 5.951e-4 | 151  | 638  | 206.8911   | 774.9826  | AAL95448.1  34 kDa membrane antigen precursor            |                         |    |    |   |   |   |   |
|         |                        |                      |          |          | 226  | 705  | 226.0000   | 924.8227  |                                                          |                         |    |    |   |   |   |   |
| FN1253  | -0.833                 | 16.061               | 6.623e-2 | 1.328e-1 | 48   | 268  | 65.7667    | 325.5413  | AAL95449.1  unknown                                      |                         |    |    |   |   |   |   |
|         |                        |                      |          |          | 326  | 284  | 326.0000   | 372.5527  |                                                          |                         |    |    |   |   |   |   |
| FN1254  | -0.817                 | 12.908               | 2.362e-2 | 3.338e-2 | 30   | 103  | 41.1042    | 125.1147  | AAL95450.1  Oxygen-insensitive NAD(P)H nitroreductase    |                         |    |    |   |   |   |   |
|         |                        |                      |          |          | 91   | 82   | 91.0000    | 107.5680  |                                                          |                         |    |    |   |   |   |   |
| FN1255  |                        |                      |          |          |      | 15   |            | 18.2206   | AAL95451.1  NagD protein                                 |                         |    |    |   |   |   |   |
|         |                        |                      |          |          |      | 14   |            | 18.3653   |                                                          |                         |    |    |   |   |   |   |
| FN1256  | -0.603                 | 4.603                |          |          |      | 5    |            | 6.0735    | AAL95452.1  C4-dicarboxylate transporter large subunit   |                         |    |    |   |   |   |   |
|         |                        |                      |          |          | 4    |      | 4.0000     |           |                                                          |                         |    |    |   |   |   |   |
| FN1258  | -0.787                 | 19.783               | 2.008e-3 | 1.297e-3 | 595  | 1049 | 815.2332   | 1274.2268 | AAL95454.1  C4-dicarboxylate-binding protein             |                         |    |    |   |   |   |   |
|         |                        |                      |          |          | 631  | 931  | 631.0000   | 1221.2907 |                                                          |                         |    |    |   |   |   |   |
| FN1260  |                        |                      |          |          |      | 4    |            | 4.8588    | AAL95456.1  Sensory Transduction Protein Kinase          |                         |    |    |   |   |   |   |
|         |                        |                      |          |          |      |      |            |           |                                                          |                         |    |    |   |   |   |   |
| FN1261  | 1.385                  | 6.168                |          |          | 10   |      | 13.7014    |           | AAL95457.1  Two-component response regulator             |                         |    |    |   |   |   |   |
|         |                        |                      |          |          |      | 4    |            | 5.2472    |                                                          |                         |    |    |   |   |   |   |
| FN1262  | 1.719                  | 6.924                |          |          |      | 5    |            | 6.0735    | AAL95458.1  Integral membrane protein                    |                         |    |    |   |   |   |   |
|         |                        |                      |          |          | 20   |      | 20.0000    |           |                                                          |                         |    |    |   |   |   |   |
| FN1263  | -0.934                 | 8.230                | 4.534e-3 | 3.968e-3 | 11   | 20   | 15.0715    | 24.2941   | AAL95459.1  Cobalt chelatase                             |                         |    |    |   |   |   |   |
|         |                        |                      |          |          | 10   | 18   | 10.0000    | 23.6125   |                                                          |                         |    |    |   |   |   |   |
| FN1264  |                        |                      |          |          |      | 25   |            | 30.3677   | AAL95460.1  Hypothetical protein                         |                         |    |    |   |   |   |   |
|         |                        |                      |          |          |      | 16   |            | 20.9889   |                                                          |                         |    |    |   |   |   |   |
| FN1265  | 0.033                  | 13.133               | 2.501e-1 | 7.434e-1 | 64   | 83   | 87.6890    | 100.8206  | AAL95461.1  Outer membrane protein                       |                         |    |    |   |   |   |   |
|         |                        |                      |          |          | 104  | 66   | 104.0000   | 86.5791   |                                                          |                         |    |    |   |   |   |   |
| FN1266  | -0.752                 | 14.116               | 4.763e-3 | 4.265e-3 | 63   | 140  | 86.3188    | 170.0589  | AAL95462.1  UTP--glucose-1-phosphate uridylyltransferase |                         |    |    |   |   |   |   |
|         |                        |                      |          |          | 119  | 134  | 119.0000   | 175.7819  |                                                          |                         |    |    |   |   |   |   |
| FN1267  | 0.132                  | 10.711               | 1.759e-1 | 4.702e-1 | 37   | 32   | 50.6952    | 38.8706   | AAL95463.1  Hypothetical protein                         |                         |    |    |   |   |   |   |
|         |                        |                      |          |          | 35   | 30   | 35.0000    | 39.3542   |                                                          |                         |    |    |   |   |   |   |
| FN1268  | -0.507                 | 15.890               | 1.852e-2 | 2.451e-2 | 155  | 272  | 212.3717   | 330.4001  | AAL95464.1  Methionyl-tRNA synthetase                    |                         |    |    |   |   |   |   |
|         |                        |                      |          |          | 201  | 196  | 201.0000   | 257.1138  |                                                          |                         |    |    |   |   |   |   |
| FN1269  | -2.042                 | 6.042                |          |          |      | 12   |            | 14.5765   | AAL95465.1  Hypothetical lipoprotein                     |                         |    |    |   |   |   |   |
|         |                        |                      |          |          | 4    | 14   | 4.0000     | 18.3653   |                                                          |                         |    |    |   |   |   |   |

Show detected proteins only  
 Show all proteins  
 Filter by category:

Proteins found: 1338

Enter (or paste) list of ORFs

Find ORFs

Test Cutoff

q-Value

p-Value

.005

| Signif | Direction | Applies To   |
|--------|-----------|--------------|
| yes    | +         | ratios, bars |
| no     | n/a       | bars         |
| yes    | -         | ratios, bars |
| yes    | +         | p-, q-Values |
| yes    | -         | p-, q-Values |

Dot Plots Dot Plots

Fn Summary Table

FnPg vs Fn

FnSg vs Fn

FnPgSg vs Fn

FnPgSg vs FnPg

FnSg vs FnPg

FnPgSg vs FnSg

Fn Coverage

| Protein | FnPg vs Fn             |                      |          |          | Raw  |     | Normalized |          | Description                                             | Log <sub>2</sub> Ratios |    |    |   |   |   |   |
|---------|------------------------|----------------------|----------|----------|------|-----|------------|----------|---------------------------------------------------------|-------------------------|----|----|---|---|---|---|
|         | Log <sub>2</sub> Ratio | Log <sub>2</sub> Sum | q-Value  | p-Value  | FnPg | Fn  | FnPg       | Fn       |                                                         | -6                      | -4 | -2 | 0 | 2 | 4 | 6 |
| FN1270  | -2.654                 | 11.438               |          |          |      | 115 |            | 139.6912 | AAL95466.1  Hypothetical cytosolic protein              |                         |    |    |   |   |   |   |
|         |                        |                      |          |          | 21   | 95  | 21.0000    | 124.6215 |                                                         |                         |    |    |   |   |   |   |
| FN1271  | -0.989                 | 10.819               | 3.867e-2 | 6.304e-2 | 9    | 50  | 12.3313    | 60.7353  | AAL95467.1  Protease IV                                 |                         |    |    |   |   |   |   |
|         |                        |                      |          |          | 48   | 45  | 48.0000    | 59.0312  |                                                         |                         |    |    |   |   |   |   |
| FN1273  | 0.174                  | 10.980               | 2.748e-1 | 8.449e-1 | 4    | 47  | 5.4806     | 57.0912  | AAL95469.1  Outer membrane protein tolC                 |                         |    |    |   |   |   |   |
|         |                        |                      |          |          | 90   | 21  | 90.0000    | 27.5479  |                                                         |                         |    |    |   |   |   |   |
| FN1274  | -2.178                 | 9.111                | 8.321e-4 | 3.478e-4 | 3    | 37  | 4.1104     | 44.9441  | AAL95470.1  Acriflavin resistance protein E             |                         |    |    |   |   |   |   |
|         |                        |                      |          |          | 18   | 42  | 18.0000    | 55.0958  |                                                         |                         |    |    |   |   |   |   |
| FN1275  | -1.966                 | 9.836                | 2.602e-4 | 5.783e-5 | 7    | 53  | 9.5910     | 64.3794  | AAL95471.1  Acriflavin resistance protein B             |                         |    |    |   |   |   |   |
|         |                        |                      |          |          | 21   | 42  | 21.0000    | 55.0958  |                                                         |                         |    |    |   |   |   |   |
| FN1276  |                        |                      |          |          | 13   |     | 17.8118    |          | AAL95472.1  Hypothetical protein                        |                         |    |    |   |   |   |   |
|         |                        |                      |          |          | 18   |     | 18.0000    |          |                                                         |                         |    |    |   |   |   |   |
| FN1277  | 0.370                  | 15.287               | 1.416e-1 | 3.524e-1 | 107  | 133 | 146.6050   | 161.5559 | AAL95473.1  Aminoacyl-histidine dipeptidase             |                         |    |    |   |   |   |   |
|         |                        |                      |          |          | 308  | 145 | 308.0000   | 190.2118 |                                                         |                         |    |    |   |   |   |   |
| FN1278  |                        |                      |          |          |      |     |            |          | AAL95474.1  Acetyltransferase                           |                         |    |    |   |   |   |   |
|         |                        |                      |          |          | 3    |     | 3.0000     |          |                                                         |                         |    |    |   |   |   |   |
| FN1279  | -0.542                 | 12.225               | 3.008e-3 | 2.25e-3  | 37   | 64  | 50.6952    | 77.7412  | AAL95475.1  Zinc metallohydrolase, glyoxalase II family |                         |    |    |   |   |   |   |
|         |                        |                      |          |          | 64   | 68  | 64.0000    | 89.2028  |                                                         |                         |    |    |   |   |   |   |
| FN1280  | 2.279                  | 9.432                | 9.521e-5 | 1.248e-5 | 40   | 11  | 54.8056    | 13.3618  | AAL95476.1  Serine protease, V8 family                  |                         |    |    |   |   |   |   |
|         |                        |                      |          |          | 61   | 8   | 61.0000    | 10.4944  |                                                         |                         |    |    |   |   |   |   |
| FN1281  | -0.305                 | 8.518                | 8.875e-2 | 1.946e-1 | 12   | 21  | 16.4417    | 25.5088  | AAL95477.1  Cysteine protease                           |                         |    |    |   |   |   |   |
|         |                        |                      |          |          | 18   | 13  | 18.0000    | 17.0535  |                                                         |                         |    |    |   |   |   |   |
| FN1282  | 0.471                  | 12.375               | 8.354e-2 | 1.801e-1 | 80   | 49  | 109.6112   | 59.5206  | AAL95478.1  LSU ribosomal protein L17P                  |                         |    |    |   |   |   |   |
|         |                        |                      |          |          | 62   | 49  | 62.0000    | 64.2785  |                                                         |                         |    |    |   |   |   |   |
| FN1283  | -0.083                 | 17.505               | 1.086e-1 | 2.515e-1 | 287  | 383 | 393.2301   | 465.2325 | AAL95479.1  DNA-directed RNA polymerase alpha chain     |                         |    |    |   |   |   |   |
|         |                        |                      |          |          | 445  | 322 | 445.0000   | 422.4013 |                                                         |                         |    |    |   |   |   |   |
| FN1284  | -0.803                 | 18.736               | 3.716e-2 | 5.98e-2  | 525  | 705 | 719.3234   | 856.3679 | AAL95480.1  SSU ribosomal protein S4P                   |                         |    |    |   |   |   |   |
|         |                        |                      |          |          | 281  | 678 | 281.0000   | 889.4040 |                                                         |                         |    |    |   |   |   |   |
| FN1285  | 1.408                  | 14.708               | 1.326e-1 | 3.242e-1 | 373  | 80  | 511.0622   | 97.1765  | AAL95481.1  SSU ribosomal protein S11P                  |                         |    |    |   |   |   |   |
|         |                        |                      |          |          | 22   | 79  | 22.0000    | 103.6326 |                                                         |                         |    |    |   |   |   |   |
| FN1286  | -2.940                 | 14.401               | 1.158e-4 | 1.712e-5 | 41   | 323 | 56.1757    | 392.3501 | AAL95482.1  SSU ribosomal protein S13P                  |                         |    |    |   |   |   |   |
|         |                        |                      |          |          | 50   | 322 | 50.0000    | 422.4013 |                                                         |                         |    |    |   |   |   |   |

Show detected proteins only  
 Show all proteins  
 Filter by category:

Proteins found:  
1338

Test Cutoff

| Signif | Direction | Applies To   |
|--------|-----------|--------------|
| yes    | +         | ratios, bars |
| no     | n/a       | bars         |
| yes    | -         | ratios, bars |
| yes    | +         | p-, q-Values |
| yes    | -         |              |

| Fn Summary Table | FnPg vs Fn             | FnSg vs Fn           | FnPgSg vs Fn | FnPgSg vs FnPg | FnSg vs FnPg | FnPgSg vs FnSg | Fn Coverage |          |                                                                      |                         |    |    |   |   |   |   |
|------------------|------------------------|----------------------|--------------|----------------|--------------|----------------|-------------|----------|----------------------------------------------------------------------|-------------------------|----|----|---|---|---|---|
|                  | FnPg vs Fn             |                      |              |                | Raw          |                | Normalized  |          |                                                                      | Log <sub>2</sub> Ratios |    |    |   |   |   |   |
| Protein          | Log <sub>2</sub> Ratio | Log <sub>2</sub> Sum | q-Value      | p-Value        | FnPg         | Fn             | FnPg        | Fn       | Description                                                          | -6                      | -4 | -2 | 0 | 2 | 4 | 6 |
| <b>FN1287</b>    | -1.021                 | 9.866                | 2.957e-2     | 4.434e-2       | 24           | 36             | 32.8834     | 43.7294  | AAL95483.1  Bacterial Protein Translation Initiation Factor 1 (IF-1) |                         |    |    |   |   |   |   |
|                  |                        |                      |              |                | 10           | 33             | 10.0000     | 43.2896  |                                                                      |                         |    |    |   |   |   |   |
| <b>FN1290</b>    | 0.645                  | 10.431               | 1.852e-1     | 5.055e-1       | 62           | 23             | 84.9487     | 27.9382  | AAL95486.1  Hypothetical protein                                     |                         |    |    |   |   |   |   |
|                  |                        |                      |              |                | 8            | 24             | 8.0000      | 31.4833  |                                                                      |                         |    |    |   |   |   |   |
| <b>FN1293</b>    |                        |                      |              |                |              | 6              |             | 7.2882   | AAL95489.1  Hypothetical protein                                     |                         |    |    |   |   |   |   |
|                  |                        |                      |              |                |              | 8              |             | 10.4944  |                                                                      |                         |    |    |   |   |   |   |
| <b>FN1296</b>    |                        |                      |              |                |              | 29             |             | 35.2265  | AAL95492.1  unknown                                                  |                         |    |    |   |   |   |   |
|                  |                        |                      |              |                |              | 16             |             | 20.9889  |                                                                      |                         |    |    |   |   |   |   |
| <b>FN1297</b>    | -0.841                 | 9.444                | 4.337e-3     | 3.722e-3       | 12           | 29             | 16.4417     | 35.2265  | AAL95493.1  Methionine aminopeptidase                                |                         |    |    |   |   |   |   |
|                  |                        |                      |              |                | 23           | 27             | 23.0000     | 35.4187  |                                                                      |                         |    |    |   |   |   |   |
| <b>FN1298</b>    | -0.719                 | 13.058               | 7.377e-3     | 7.764e-3       | 62           | 99             | 84.9487     | 120.2559 | AAL95494.1  Adenylate kinase                                         |                         |    |    |   |   |   |   |
|                  |                        |                      |              |                | 59           | 89             | 59.0000     | 116.7507 |                                                                      |                         |    |    |   |   |   |   |
| <b>FN1299</b>    |                        |                      |              |                |              | 6              |             | 6.0000   | AAL95495.1  dTDP-glucose 4,6-dehydratase                             |                         |    |    |   |   |   |   |
|                  |                        |                      |              |                |              |                |             |          |                                                                      |                         |    |    |   |   |   |   |
| <b>FN1301</b>    | -0.775                 | 12.818               | 4.601e-2     | 8.006e-2       | 70           | 88             | 95.9098     | 106.8941 | AAL95497.1  ABC transporter ATP-binding protein                      |                         |    |    |   |   |   |   |
|                  |                        |                      |              |                | 34           | 88             | 34.0000     | 115.4389 |                                                                      |                         |    |    |   |   |   |   |
| <b>FN1302</b>    | 0.143                  | 17.191               | 2.688e-1     | 8.195e-1       | 489          | 349            | 669.9984    | 423.9325 | AAL95498.1  Hypothetical protein                                     |                         |    |    |   |   |   |   |
|                  |                        |                      |              |                | 143          | 238            | 143.0000    | 312.2097 |                                                                      |                         |    |    |   |   |   |   |
| <b>FN1303</b>    | -0.634                 | 12.859               | 6.586e-4     | 2.35e-4        | 55           | 85             | 75.3577     | 103.2500 | AAL95499.1  hypothetical cytosolic protein                           |                         |    |    |   |   |   |   |
|                  |                        |                      |              |                | 63           | 85             | 63.0000     | 111.5034 |                                                                      |                         |    |    |   |   |   |   |
| <b>FN1304</b>    | -0.297                 | 14.350               | 3.374e-2     | 5.275e-2       | 83           | 133            | 113.7216    | 161.5559 | AAL95500.1  Single-strand DNA binding protein                        |                         |    |    |   |   |   |   |
|                  |                        |                      |              |                | 147          | 121            | 147.0000    | 158.7284 |                                                                      |                         |    |    |   |   |   |   |
| <b>FN1305</b>    | 0.390                  | 11.020               | 1.948e-3     | 1.24e-3        | 36           | 31             | 49.3250     | 37.6559  | AAL95501.1  Hypothetical cytosolic protein                           |                         |    |    |   |   |   |   |
|                  |                        |                      |              |                | 55           | 32             | 55.0000     | 41.9778  |                                                                      |                         |    |    |   |   |   |   |
| <b>FN1306</b>    | 0.930                  | 14.022               |              |                |              | 75             |             | 91.1030  | AAL95502.1  Methyltransferase                                        |                         |    |    |   |   |   |   |
|                  |                        |                      |              |                | 178          | 73             | 178.0000    | 95.7618  |                                                                      |                         |    |    |   |   |   |   |
| <b>FN1309</b>    | -1.262                 | 15.446               | 2.089e-3     | 1.378e-3       | 121          | 272            | 165.7869    | 330.4001 | AAL95505.1  Hypothetical protein                                     |                         |    |    |   |   |   |   |
|                  |                        |                      |              |                | 107          | 247            | 107.0000    | 324.0159 |                                                                      |                         |    |    |   |   |   |   |
| <b>FN1311</b>    |                        |                      |              |                |              | 8              |             | 10.4944  | AAL95507.1  Biopolymer transport exbD protein                        |                         |    |    |   |   |   |   |
|                  |                        |                      |              |                |              |                |             |          |                                                                      |                         |    |    |   |   |   |   |
| <b>FN1312</b>    |                        |                      |              |                |              | 44             |             | 53.4471  | AAL95508.1  Biopolymer transport exbB protein                        |                         |    |    |   |   |   |   |
|                  |                        |                      |              |                |              | 52             |             | 68.2139  |                                                                      |                         |    |    |   |   |   |   |

 Show detected proteins only  
 Show all proteins

 Filter by category:

 Proteins found:  
 1338

 Enter (or  
 paste) list  
 of ORFs

Find ORFs

Test

Cutoff




| Signif | Direction | Applies To   |
|--------|-----------|--------------|
| yes    | +         | ratios, bars |
| no     | n/a       | bars         |
| yes    | -         | ratios, bars |
| yes    | +         | p-, q-Values |
| yes    | -         | p-, q-Values |

Dot Plots Dot Plots

Fn Summary Table FnPg vs Fn FnSg vs Fn FnPgSg vs Fn FnPgSg vs FnPg FnSg vs FnPg FnPgSg vs FnSg Fn Coverage

| Protein | FnPg vs Fn             |                      |          |          | Raw  |     | Normalized |          | Description                                                        | Log <sub>2</sub> Ratios |    |    |   |   |   |   |
|---------|------------------------|----------------------|----------|----------|------|-----|------------|----------|--------------------------------------------------------------------|-------------------------|----|----|---|---|---|---|
|         | Log <sub>2</sub> Ratio | Log <sub>2</sub> Sum | q-Value  | p-Value  | FnPg | Fn  | FnPg       | Fn       |                                                                    | -6                      | -4 | -2 | 0 | 2 | 4 | 6 |
| FN1313  | -0.725                 | 12.654               | 8.857e-4 | 3.897e-4 | 51   | 90  | 69.8771    | 109.3236 | AAL95509.1  Oligopeptide-binding protein oppA                      |                         |    |    |   |   |   |   |
|         |                        |                      |          |          | 55   | 74  | 55.0000    | 97.0736  |                                                                    |                         |    |    |   |   |   |   |
| FN1315  |                        |                      |          |          |      | 7   |            | 8.5029   | AAL95511.1  Hypothetical protein                                   |                         |    |    |   |   |   |   |
|         |                        |                      |          |          |      |     |            |          |                                                                    |                         |    |    |   |   |   |   |
| FN1317  | -0.425                 | 7.763                | 6.64e-2  | 1.333e-1 | 12   | 13  | 16.4417    | 15.7912  | AAL95513.1  RNA polymerase sigma factor                            |                         |    |    |   |   |   |   |
|         |                        |                      |          |          | 9    | 14  | 9.0000     | 18.3653  |                                                                    |                         |    |    |   |   |   |   |
| FN1318  | -0.535                 | 10.215               | 1.379e-2 | 1.671e-2 | 17   | 37  | 23.2924    | 44.9441  | AAL95514.1  RNA polymerase sigma factor rpoD                       |                         |    |    |   |   |   |   |
|         |                        |                      |          |          | 34   | 29  | 34.0000    | 38.0424  |                                                                    |                         |    |    |   |   |   |   |
| FN1319  | -0.561                 | 7.146                | 7.728e-3 | 8.256e-3 | 7    | 13  | 9.5910     | 15.7912  | AAL95515.1  DNA primase                                            |                         |    |    |   |   |   |   |
|         |                        |                      |          |          | 10   | 10  | 10.0000    | 13.1181  |                                                                    |                         |    |    |   |   |   |   |
| FN1320  | -1.481                 | 16.169               | 1.26e-4  | 1.988e-5 | 116  | 385 | 158.9362   | 467.6619 | AAL95516.1  Peptidyl-prolyl cis-trans isomerase                    |                         |    |    |   |   |   |   |
|         |                        |                      |          |          | 166  | 335 | 166.0000   | 439.4548 |                                                                    |                         |    |    |   |   |   |   |
| FN1321  | 0.002                  | 19.560               | 3.006e-1 | 9.58e-1  | 641  | 752 | 878.2596   | 913.4591 | AAL95517.1  Acetoacetate metabolism regulatory protein atoC        |                         |    |    |   |   |   |   |
|         |                        |                      |          |          | 881  | 643 | 881.0000   | 843.4908 |                                                                    |                         |    |    |   |   |   |   |
| FN1322  | 0.997                  | 9.177                |          |          |      | 14  |            | 17.0059  | AAL95518.1  Membrane metalloprotease                               |                         |    |    |   |   |   |   |
|         |                        |                      |          |          | 34   | 13  | 34.0000    | 17.0535  |                                                                    |                         |    |    |   |   |   |   |
| FN1323  | -0.817                 | 7.250                | 2.046e-4 | 3.943e-5 | 7    | 14  | 9.5910     | 17.0059  | AAL95519.1  Thymidylate kinase                                     |                         |    |    |   |   |   |   |
|         |                        |                      |          |          | 9    | 12  | 9.0000     | 15.7417  |                                                                    |                         |    |    |   |   |   |   |
| FN1324  | 0.097                  | 10.185               | 2.672e-1 | 8.128e-1 | 15   | 23  | 20.5521    | 27.9382  | AAL95520.1  1-deoxy-D-xylulose 5-phosphate reductoisomerase        |                         |    |    |   |   |   |   |
|         |                        |                      |          |          | 50   | 29  | 50.0000    | 38.0424  |                                                                    |                         |    |    |   |   |   |   |
| FN1326  | -0.927                 | 6.927                |          |          |      | 11  |            | 13.3618  | AAL95522.1  Undecaprenyl pyrophosphate synthetase                  |                         |    |    |   |   |   |   |
|         |                        |                      |          |          | 8    | 13  | 8.0000     | 17.0535  |                                                                    |                         |    |    |   |   |   |   |
| FN1327  |                        |                      |          |          |      |     |            | 3.9354   | AAL95523.1  Dimethylallyltransferase                               |                         |    |    |   |   |   |   |
|         |                        |                      |          |          |      | 3   |            |          |                                                                    |                         |    |    |   |   |   |   |
| FN1328  |                        |                      |          |          |      | 11  |            | 13.3618  | AAL95524.1  Exodeoxyribonuclease VII small subunit                 |                         |    |    |   |   |   |   |
|         |                        |                      |          |          |      | 12  |            | 15.7417  |                                                                    |                         |    |    |   |   |   |   |
| FN1330  | -0.281                 | 3.451                |          |          |      | 3   |            | 3.6441   | AAL95526.1  S-adenosylmethionine:tRNA ribosyltransferase-isomerase |                         |    |    |   |   |   |   |
|         |                        |                      |          |          | 3    |     | 3.0000     |          |                                                                    |                         |    |    |   |   |   |   |
| FN1331  |                        |                      |          |          |      | 5   |            | 6.0735   | AAL95527.1  Methyltransferase                                      |                         |    |    |   |   |   |   |
|         |                        |                      |          |          |      | 8   |            | 10.4944  |                                                                    |                         |    |    |   |   |   |   |
| FN1332  | -0.954                 | 11.223               | 1.642e-6 | 5.352e-8 | 25   | 57  | 34.2535    | 69.2383  | AAL95528.1  Bacterial Peptide Chain Release Factor 1 (RF-1)        |                         |    |    |   |   |   |   |
|         |                        |                      |          |          | 36   | 51  | 36.0000    | 66.9021  |                                                                    |                         |    |    |   |   |   |   |

Show detected proteins only  
 Show all proteins  
 Filter by category:

Proteins found: 1338

Enter (or paste) list of ORFs

Find ORFs

Test Cutoff

q-Value

p-Value

.005

| Signif | Direction | Applies To   |
|--------|-----------|--------------|
| yes    | +         | ratios, bars |
| no     | n/a       | bars         |
| yes    | -         | ratios, bars |
| yes    | +         | p-, q-Values |
| yes    | -         | p-, q-Values |

Dot Plots Dot Plots

Fn Summary Table FnPg vs Fn FnSg vs Fn FnPgSg vs Fn FnPgSg vs FnPg FnSg vs FnPg FnPgSg vs FnSg Fn Coverage

| Protein | FnPg vs Fn             |                      |          |          | Raw  |     | Normalized |          | Description                                                 | Log <sub>2</sub> Ratios |    |    |   |   |   |   |
|---------|------------------------|----------------------|----------|----------|------|-----|------------|----------|-------------------------------------------------------------|-------------------------|----|----|---|---|---|---|
|         | Log <sub>2</sub> Ratio | Log <sub>2</sub> Sum | q-Value  | p-Value  | FnPg | Fn  | FnPg       | Fn       |                                                             | -6                      | -4 | -2 | 0 | 2 | 4 | 6 |
| FN1334  | 0.666                  | 8.947                | 1.665e-1 | 4.361e-1 | 35   | 15  | 47.9549    | 18.2206  | AAL95530.1  N-acetylmuramoyl-L-alanine amidase              |                         |    |    |   |   |   |   |
|         |                        |                      |          |          | 8    | 13  | 8.0000     | 17.0535  |                                                             |                         |    |    |   |   |   |   |
| FN1335  | -0.510                 | 12.806               | 3.382e-2 | 5.293e-2 | 40   | 95  | 54.8056    | 115.3971 | AAL95531.1  Protein translocase subunit YajC                |                         |    |    |   |   |   |   |
|         |                        |                      |          |          | 87   | 66  | 87.0000    | 86.5791  |                                                             |                         |    |    |   |   |   |   |
| FN1336  | -0.345                 | 9.253                |          |          | 16   | 21  | 21.9222    | 25.5088  | AAL95532.1  Hypothetical protein                            |                         |    |    |   |   |   |   |
|         |                        |                      |          |          |      | 23  |            | 30.1715  |                                                             |                         |    |    |   |   |   |   |
| FN1337  | -2.173                 | 7.980                | 6.754e-3 | 6.861e-3 | 8    | 21  | 10.9611    | 25.5088  | AAL95533.1  unknown                                         |                         |    |    |   |   |   |   |
|         |                        |                      |          |          | 4    | 32  | 4.0000     | 41.9778  |                                                             |                         |    |    |   |   |   |   |
| FN1340  | -0.495                 | 16.632               | 5.847e-2 | 1.116e-1 | 259  | 288 | 354.8662   | 349.8354 | AAL95536.1  Glutamyl-tRNA synthetase                        |                         |    |    |   |   |   |   |
|         |                        |                      |          |          | 182  | 310 | 182.0000   | 406.6596 |                                                             |                         |    |    |   |   |   |   |
| FN1341  | -0.268                 | 7.438                |          |          |      | 13  |            | 15.7912  | AAL95537.1  Bacterial Peptide Chain Release Factor 2 (RF-2) |                         |    |    |   |   |   |   |
|         |                        |                      |          |          | 12   | 10  | 12.0000    | 13.1181  |                                                             |                         |    |    |   |   |   |   |
| FN1343  | 1.511                  | 9.473                |          |          |      | 13  |            | 15.7912  | AAL95539.1  seC-independent protein TATD                    |                         |    |    |   |   |   |   |
|         |                        |                      |          |          | 45   |     | 45.0000    |          |                                                             |                         |    |    |   |   |   |   |
| FN1346  |                        |                      |          |          |      |     |            |          | AAL95542.1  Hypothetical cytosolic protein                  |                         |    |    |   |   |   |   |
|         |                        |                      |          |          | 6    |     | 6.0000     |          |                                                             |                         |    |    |   |   |   |   |
| FN1347  | -1.806                 | 7.591                | 1.867e-3 | 1.164e-3 | 5    | 19  | 6.8507     | 23.0794  | AAL95543.1  Hypothetical cytosolic protein                  |                         |    |    |   |   |   |   |
|         |                        |                      |          |          | 8    | 22  | 8.0000     | 28.8597  |                                                             |                         |    |    |   |   |   |   |
| FN1348  | -1.177                 | 8.158                | 1.437e-2 | 1.76e-2  | 4    | 17  | 5.4806     | 20.6500  | AAL95544.1  ABC transporter ATP-binding protein             |                         |    |    |   |   |   |   |
|         |                        |                      |          |          | 17   | 23  | 17.0000    | 30.1715  |                                                             |                         |    |    |   |   |   |   |
| FN1349  | -2.532                 | 8.146                |          |          |      | 31  |            | 37.6559  | AAL95545.1  ABC transporter permease protein                |                         |    |    |   |   |   |   |
|         |                        |                      |          |          | 7    | 33  | 7.0000     | 43.2896  |                                                             |                         |    |    |   |   |   |   |
| FN1351  | -0.416                 | 11.067               | 8.498e-2 | 1.841e-1 | 33   | 33  | 45.2146    | 40.0853  | AAL95547.1  15 kDa lipoprotein precursor                    |                         |    |    |   |   |   |   |
|         |                        |                      |          |          | 35   | 51  | 35.0000    | 66.9021  |                                                             |                         |    |    |   |   |   |   |
| FN1352  | -0.521                 | 11.686               | 3.2e-3   | 2.46e-3  | 32   | 56  | 43.8445    | 68.0235  | AAL95548.1  ABC transporter ATP-binding protein             |                         |    |    |   |   |   |   |
|         |                        |                      |          |          | 52   | 53  | 52.0000    | 69.5257  |                                                             |                         |    |    |   |   |   |   |
| FN1353  | -0.149                 | 7.764                |          |          |      | 18  |            | 21.8647  | AAL95549.1  ABC transporter permease protein                |                         |    |    |   |   |   |   |
|         |                        |                      |          |          | 14   | 7   | 14.0000    | 9.1826   |                                                             |                         |    |    |   |   |   |   |
| FN1354  | -0.116                 | 10.024               |          |          |      | 24  |            | 29.1529  | AAL95550.1  ABC transporter permease protein                |                         |    |    |   |   |   |   |
|         |                        |                      |          |          | 31   | 29  | 31.0000    | 38.0424  |                                                             |                         |    |    |   |   |   |   |
| FN1355  |                        |                      |          |          |      | 4   |            | 4.8588   | AAL95551.1  Integral membrane protein                       |                         |    |    |   |   |   |   |
|         |                        |                      |          |          |      | 7   |            | 9.1826   |                                                             |                         |    |    |   |   |   |   |

Show detected proteins only  
 Show all proteins  
 Filter by category:

Proteins found: 1338

Enter (or paste) list of ORFs

Test Cutoff

| Signif      | Direction | Applies To |
|-------------|-----------|------------|
| red         | yes       | +          |
| yellow      | no        | n/a        |
| green       | yes       | -          |
| pink        | yes       | +          |
| light green | yes       | -          |

Applies To: ratios, bars; ratios, bars; ratios, bars; p-, q-Values

Fn Summary Table FnPg vs Fn FnSg vs Fn FnPgSg vs Fn FnPgSg vs FnPg FnSg vs FnPg FnPgSg vs FnSg Fn Coverage

| Protein       | FnPg vs Fn             |                      |          |          | Raw  |     | Normalized |          | Description                                              | Log <sub>2</sub> Ratios |    |    |   |   |   |   |
|---------------|------------------------|----------------------|----------|----------|------|-----|------------|----------|----------------------------------------------------------|-------------------------|----|----|---|---|---|---|
|               | Log <sub>2</sub> Ratio | Log <sub>2</sub> Sum | q-Value  | p-Value  | FnPg | Fn  | FnPg       | Fn       |                                                          | -6                      | -4 | -2 | 0 | 2 | 4 | 6 |
| <b>FN1358</b> |                        |                      |          |          | 48   |     | 48.0000    |          | AAL95554.1  Hypothetical protein                         |                         |    |    |   |   |   |   |
| <b>FN1359</b> | 1.675                  | 16.313               | 6.126e-2 | 1.195e-1 | 167  | 116 | 228.8134   | 140.9059 | AAL95555.1  Dipeptide-binding protein                    |                         |    |    |   |   |   |   |
| <b>FN1362</b> |                        |                      |          |          | 25   |     | 34.2535    |          | AAL95558.1  Dipeptide transport ATP-binding protein dppD |                         |    |    |   |   |   |   |
| <b>FN1363</b> | 1.759                  | 8.809                | 3.939e-2 | 6.462e-2 | 16   | 6   | 21.9222    | 7.2882   | AAL95559.1  Dipeptide transport ATP-binding protein dppF |                         |    |    |   |   |   |   |
| <b>FN1364</b> | -1.345                 | 12.067               |          |          | 30   | 79  | 41.1042    | 95.9618  | AAL95560.1  LSU ribosomal protein L32P                   |                         |    |    |   |   |   |   |
| <b>FN1365</b> | -0.595                 | 14.347               | 8.129e-2 | 1.736e-1 | 43   | 156 | 58.9160    | 189.4942 | AAL95561.1  GTP-binding protein                          |                         |    |    |   |   |   |   |
| <b>FN1366</b> | -0.402                 | 15.015               | 2.211e-2 | 3.071e-2 | 99   | 190 | 135.6438   | 230.7942 | AAL95562.1  Triosephosphate isomerase                    |                         |    |    |   |   |   |   |
| <b>FN1371</b> |                        |                      |          |          | 4    |     | 4.0000     |          | AAL95567.1  Ribonuclease HII                             |                         |    |    |   |   |   |   |
| <b>FN1374</b> | -0.919                 | 6.534                |          |          |      | 11  |            | 13.3618  | AAL95570.1  Transcriptional regulator                    |                         |    |    |   |   |   |   |
| <b>FN1375</b> | 1.676                  | 11.582               |          |          |      | 24  |            | 29.1529  | AAL95571.1  Citrate-sodium symport                       |                         |    |    |   |   |   |   |
| <b>FN1376</b> | -0.022                 | 18.502               | 2.977e-1 | 9.453e-1 | 282  | 510 | 386.3794   | 619.5002 | AAL95572.1  Oxaloacetate decarboxylase alpha chain       |                         |    |    |   |   |   |   |
| <b>FN1378</b> | -0.796                 | 9.834                | 7.855e-2 | 1.658e-1 | 5    | 31  | 6.8507     | 37.6559  | AAL95574.1  Citrate lyase acyl carrier protein           |                         |    |    |   |   |   |   |
| <b>FN1379</b> | 0.395                  | 15.728               | 2.098e-1 | 5.92e-1  | 60   | 179 | 82.2084    | 217.4324 | AAL95575.1  Citrate lyase beta chain                     |                         |    |    |   |   |   |   |
| <b>FN1380</b> | 0.460                  | 17.821               | 2.113e-1 | 5.973e-1 | 81   | 344 | 110.9813   | 417.8589 | AAL95576.1  Citrate lyase beta chain                     |                         |    |    |   |   |   |   |
| <b>FN1381</b> |                        |                      |          |          |      | 4   |            | 4.8588   | AAL95577.1  unknown                                      |                         |    |    |   |   |   |   |
| <b>FN1382</b> |                        |                      |          |          | 13   |     | 13.0000    |          | AAL95578.1  ATPase                                       |                         |    |    |   |   |   |   |

Show detected proteins only  
 Show all proteins  
 Filter by category:

Proteins found:  
1338

Enter (or paste) list of ORFs

Find ORFs

**Test**      **Cutoff**

q-Value      .005

p-Value

| Signif | Direction | Applies To   |
|--------|-----------|--------------|
| yes    | +         | ratios, bars |
| no     | n/a       | bars         |
| yes    | -         | ratios, bars |
| yes    | +         | p-, q-Values |
| yes    | -         | p-, q-Values |

Dot Plots    Dot Plots



Fn Summary Table FnPg vs Fn FnSg vs Fn FnPgSg vs Fn FnPgSg vs FnPg FnSg vs FnPg FnPgSg vs FnSg Fn Coverage

| Protein | FnPg vs Fn             |                      |          |          | Raw  |     | Normalized |          | Description                                                | Log <sub>2</sub> Ratios |    |    |   |   |   |   |
|---------|------------------------|----------------------|----------|----------|------|-----|------------|----------|------------------------------------------------------------|-------------------------|----|----|---|---|---|---|
|         | Log <sub>2</sub> Ratio | Log <sub>2</sub> Sum | q-Value  | p-Value  | FnPg | Fn  | FnPg       | Fn       |                                                            | -6                      | -4 | -2 | 0 | 2 | 4 | 6 |
| FN1383  |                        |                      |          |          | 9    |     | 12.3313    |          | AAL95579.1  DNA polymerase III alpha subunit               |                         |    |    |   |   |   |   |
|         |                        |                      |          |          | 5    |     | 5.0000     |          |                                                            |                         |    |    |   |   |   |   |
| FN1385  | -1.567                 | 4.737                |          |          |      | 6   |            | 7.2882   | AAL95581.1  Hypothetical protein                           |                         |    |    |   |   |   |   |
|         |                        |                      |          |          | 3    | 8   | 3.0000     | 10.4944  |                                                            |                         |    |    |   |   |   |   |
| FN1386  | 0.648                  | 6.271                |          |          |      | 4   |            | 4.8588   | AAL95582.1  SWF/SNF family helicase                        |                         |    |    |   |   |   |   |
|         |                        |                      |          |          | 11   | 7   | 11.0000    | 9.1826   |                                                            |                         |    |    |   |   |   |   |
| FN1391  | -1.043                 | 12.722               | 2.913e-3 | 2.15e-3  | 50   | 110 | 68.5070    | 133.6177 | AAL95584.1  Acetyltransferase                              |                         |    |    |   |   |   |   |
|         |                        |                      |          |          | 46   | 78  | 46.0000    | 102.3208 |                                                            |                         |    |    |   |   |   |   |
| FN1392  | -0.672                 | 14.866               | 9.864e-2 | 2.232e-1 | 167  | 181 | 228.8134   | 219.8618 | AAL95585.1  SSU ribosomal protein S16P                     |                         |    |    |   |   |   |   |
|         |                        |                      |          |          | 45   | 165 | 45.0000    | 216.4479 |                                                            |                         |    |    |   |   |   |   |
| FN1393  | -2.009                 | 9.995                | 1.006e-3 | 4.741e-4 | 5    | 58  | 6.8507     | 70.4530  | AAL95586.1  Signal recognition particle, subunit FFH/SRP54 |                         |    |    |   |   |   |   |
|         |                        |                      |          |          | 25   | 44  | 25.0000    | 57.7194  |                                                            |                         |    |    |   |   |   |   |
| FN1397  | -1.469                 | 13.773               | 4.132e-3 | 3.477e-3 | 33   | 161 | 45.2146    | 195.5677 | AAL95590.1  Glutaminase                                    |                         |    |    |   |   |   |   |
|         |                        |                      |          |          | 97   | 151 | 97.0000    | 198.0826 |                                                            |                         |    |    |   |   |   |   |
| FN1398  | -1.087                 | 12.699               | 3.05e-2  | 4.617e-2 | 16   | 119 | 21.9222    | 144.5500 | AAL95591.1  Amino acid carrier protein alsT                |                         |    |    |   |   |   |   |
|         |                        |                      |          |          | 90   | 71  | 90.0000    | 93.1382  |                                                            |                         |    |    |   |   |   |   |
| FN1406  | 0.209                  | 11.969               | 2.406e-1 | 7.065e-1 | 22   | 43  | 30.1431    | 52.2324  | AAL95599.1  Histidine ammonia-lyase                        |                         |    |    |   |   |   |   |
|         |                        |                      |          |          | 106  | 50  | 106.0000   | 65.5903  |                                                            |                         |    |    |   |   |   |   |
| FN1407  | 1.487                  | 8.513                |          |          |      | 8   |            | 9.7176   | AAL95600.1  Glutamate formiminotransferase                 |                         |    |    |   |   |   |   |
|         |                        |                      |          |          | 32   | 10  | 32.0000    | 13.1181  |                                                            |                         |    |    |   |   |   |   |
| FN1411  | 1.414                  | 15.743               | 2.48e-2  | 3.551e-2 | 196  | 112 | 268.5474   | 136.0471 | AAL95604.1  Threonine dehydratase                          |                         |    |    |   |   |   |   |
|         |                        |                      |          |          | 496  | 115 | 496.0000   | 150.8576 |                                                            |                         |    |    |   |   |   |   |
| FN1412  |                        |                      |          |          | 20   |     | 27.4028    |          | AAL95605.1  5-methylthioribose kinase                      |                         |    |    |   |   |   |   |
| FN1413  |                        |                      |          |          | 10   |     | 13.7014    |          | AAL95606.1  Translation initiation factor EIF-2B subunit 1 |                         |    |    |   |   |   |   |
|         |                        |                      |          |          |      |     |            |          |                                                            |                         |    |    |   |   |   |   |
| FN1415  |                        |                      |          |          | 11   |     | 15.0715    |          | AAL95608.1  NADH-dependent butanol dehydrogenase A         |                         |    |    |   |   |   |   |
|         |                        |                      |          |          | 7    |     | 7.0000     |          |                                                            |                         |    |    |   |   |   |   |
| FN1416  |                        |                      |          |          | 24   |     | 24.0000    |          | AAL95609.1  Transcriptional regulator, GntR family         |                         |    |    |   |   |   |   |
| FN1417  | 1.041                  | 5.824                |          |          | 7    |     | 9.5910     |          | AAL95610.1  L-fucose phosphate aldolase                    |                         |    |    |   |   |   |   |
|         |                        |                      |          |          | 12   | 4   | 12.0000    | 5.2472   |                                                            |                         |    |    |   |   |   |   |

Show detected proteins only  
 Show all proteins  
 Filter by category:

Proteins found: 1338

Test Cutoff

| Signif | Direction | Applies To   |
|--------|-----------|--------------|
| yes    | +         | ratios, bars |
| no     | n/a       | bars         |
| yes    | -         | ratios, bars |
| yes    | +         | p-, q-Values |
| yes    | -         | p-, q-Values |

Fn Summary Table FnPg vs Fn FnSg vs Fn FnPgSg vs Fn FnPgSg vs FnPg FnSg vs FnPg FnPgSg vs FnSg Fn Coverage

| Protein | FnPg vs Fn             |                      |          |          | Raw  |     | Normalized |           | Description                                                                         | Log <sub>2</sub> Ratios |    |    |   |   |   |   |
|---------|------------------------|----------------------|----------|----------|------|-----|------------|-----------|-------------------------------------------------------------------------------------|-------------------------|----|----|---|---|---|---|
|         | Log <sub>2</sub> Ratio | Log <sub>2</sub> Sum | q-Value  | p-Value  | FnPg | Fn  | FnPg       | Fn        |                                                                                     | -6                      | -4 | -2 | 0 | 2 | 4 | 6 |
| FN1418  | -0.352                 | 4.431                |          |          | 3    |     | 4.1104     |           | AAL95611.1  Transcriptional regulator, GntR family                                  |                         |    |    |   |   |   |   |
|         |                        |                      |          |          |      | 4   |            | 5.2472    |                                                                                     |                         |    |    |   |   |   |   |
| FN1419  | 3.256                  | 21.695               | 2.928e-2 | 4.378e-2 | 6075 | 475 | 8323.5996  | 576.9855  | AAL95612.1  Methionine gamma-lyase                                                  |                         |    |    |   |   |   |   |
|         |                        |                      |          |          | 3065 | 469 | 3065.0000  | 615.2367  |                                                                                     |                         |    |    |   |   |   |   |
| FN1421  | 1.019                  | 21.168               | 5.457e-2 | 1.011e-1 | 2193 | 842 | 3004.7167  | 1022.7826 | AAL95614.1  Pyruvate-flavodoxin oxidoreductase                                      |                         |    |    |   |   |   |   |
|         |                        |                      |          |          | 1365 | 864 | 1365.0000  | 1133.3998 |                                                                                     |                         |    |    |   |   |   |   |
| FN1423  | -0.853                 | 14.131               | 4.087e-2 | 6.792e-2 | 36   | 155 | 49.3250    | 188.2795  | AAL95616.1  Flavoprotein                                                            |                         |    |    |   |   |   |   |
|         |                        |                      |          |          | 150  | 131 | 150.0000   | 171.8465  |                                                                                     |                         |    |    |   |   |   |   |
| FN1424  | -1.272                 | 15.849               | 1.827e-2 | 2.406e-2 | 45   | 329 | 61.6563    | 399.6383  | AAL95617.1  ACYL-COA dehydrogenase, short-chain specific                            |                         |    |    |   |   |   |   |
|         |                        |                      |          |          | 251  | 271 | 251.0000   | 355.4992  |                                                                                     |                         |    |    |   |   |   |   |
| FN1426  | -2.115                 | 16.397               | 2.673e-3 | 1.909e-3 | 44   | 496 | 60.2862    | 602.4943  | AAL95619.1  Serine protease                                                         |                         |    |    |   |   |   |   |
|         |                        |                      |          |          | 222  | 473 | 222.0000   | 620.4839  |                                                                                     |                         |    |    |   |   |   |   |
| FN1429  |                        |                      |          |          |      | 7   |            | 8.5029    | AAL95622.1  Branched-chain amino acid transport ATP-binding protein livG            |                         |    |    |   |   |   |   |
|         |                        |                      |          |          |      |     |            |           |                                                                                     |                         |    |    |   |   |   |   |
| FN1432  |                        |                      |          |          |      | 52  |            | 63.1647   | AAL95625.1  Leucine-, isoleucine-, valine-, threonine-, and alanine-binding protein |                         |    |    |   |   |   |   |
|         |                        |                      |          |          |      | 38  |            | 49.8486   |                                                                                     |                         |    |    |   |   |   |   |
| FN1433  | 0.148                  | 16.031               | 1.611e-2 | 2.037e-2 | 202  | 193 | 276.7682   | 234.4383  | AAL95626.1  Short chain dehydrogenase                                               |                         |    |    |   |   |   |   |
|         |                        |                      |          |          | 268  | 196 | 268.0000   | 257.1138  |                                                                                     |                         |    |    |   |   |   |   |
| FN1434  | -0.562                 | 13.916               | 3.737e-2 | 6.026e-2 | 53   | 117 | 72.6174    | 142.1206  | AAL95627.1  Tetratricopeptide repeat family protein                                 |                         |    |    |   |   |   |   |
|         |                        |                      |          |          | 132  | 122 | 132.0000   | 160.0402  |                                                                                     |                         |    |    |   |   |   |   |
| FN1437  | -1.261                 | 14.910               | 4.208e-3 | 3.566e-3 | 110  | 215 | 150.7154   | 261.1618  | AAL95630.1  LSU ribosomal protein L28P                                              |                         |    |    |   |   |   |   |
|         |                        |                      |          |          | 76   | 215 | 76.0000    | 282.0381  |                                                                                     |                         |    |    |   |   |   |   |
| FN1439  | -2.376                 | 11.423               |          |          |      | 81  |            | 98.3912   | AAL95632.1  Transcriptional regulator, DeoR family                                  |                         |    |    |   |   |   |   |
|         |                        |                      |          |          | 23   | 107 | 23.0000    | 140.3632  |                                                                                     |                         |    |    |   |   |   |   |
| FN1440  | -1.976                 | 12.297               | 1.173e-3 | 6.117e-4 | 23   | 128 | 31.5132    | 155.4824  | AAL95633.1  1-phosphofructokinase                                                   |                         |    |    |   |   |   |   |
|         |                        |                      |          |          | 40   | 96  | 40.0000    | 125.9333  |                                                                                     |                         |    |    |   |   |   |   |
| FN1441  | -2.055                 | 13.602               | 1.297e-3 | 7.084e-4 | 20   | 195 | 27.4028    | 236.8677  | AAL95634.1  PTS system, fructose-specific IIABC component                           |                         |    |    |   |   |   |   |
|         |                        |                      |          |          | 82   | 166 | 82.0000    | 217.7597  |                                                                                     |                         |    |    |   |   |   |   |
| FN1444  | 0.031                  | 17.717               | 2.477e-1 | 7.34e-1  | 374  | 362 | 512.4323   | 439.7237  | AAL95637.1  GMP synthase (glutamine-hydrolyzing)                                    |                         |    |    |   |   |   |   |
|         |                        |                      |          |          | 426  | 365 | 426.0000   | 478.8089  |                                                                                     |                         |    |    |   |   |   |   |
| FN1445  | -1.799                 | 10.317               | 3.063e-3 | 2.309e-3 | 17   | 46  | 23.2924    | 55.8765   | AAL95638.1  DNA helicase                                                            |                         |    |    |   |   |   |   |
|         |                        |                      |          |          | 15   | 59  | 15.0000    | 77.3965   |                                                                                     |                         |    |    |   |   |   |   |

Show detected proteins only  
 Show all proteins  
 Filter by category:

Proteins found: 1338

Enter (or paste) list of ORFs

Find ORFs

Test Cutoff

q-Value p-Value

.005

| Signif | Direction | Applies To   |
|--------|-----------|--------------|
| yes    | +         | ratios, bars |
| no     | n/a       | bars         |
| yes    | -         | ratios, bars |
| yes    | +         | p-, q-Values |
| yes    | -         | p-, q-Values |

Dot Plots Dot Plots

Fn Summary Table FnPg vs Fn FnSg vs Fn FnPgSg vs Fn FnPgSg vs FnPg FnSg vs FnPg FnPgSg vs FnSg Fn Coverage

| Protein | FnPg vs Fn             |                      |          |           | Raw  |     | Normalized |          | Description                                                                                     | Log <sub>2</sub> Ratios |    |    |   |   |   |   |
|---------|------------------------|----------------------|----------|-----------|------|-----|------------|----------|-------------------------------------------------------------------------------------------------|-------------------------|----|----|---|---|---|---|
|         | Log <sub>2</sub> Ratio | Log <sub>2</sub> Sum | q-Value  | p-Value   | FnPg | Fn  | FnPg       | Fn       |                                                                                                 | -6                      | -4 | -2 | 0 | 2 | 4 | 6 |
| FN1449  | -3.578                 | 15.303               | 3.516e-7 | 7.114e-9  | 55   | 560 | 75.3577    | 680.2355 | AAL95642.1  Fusobacterium outer membrane protein family                                         |                         |    |    |   |   |   |   |
|         |                        |                      |          |           | 41   | 541 | 41.0000    | 709.6867 |                                                                                                 |                         |    |    |   |   |   |   |
| FN1450  | -0.451                 | 8.791                |          |           |      | 20  |            | 24.2941  | AAL95643.1  Integral membrane protein                                                           |                         |    |    |   |   |   |   |
|         |                        |                      |          |           | 18   | 19  | 18.0000    | 24.9243  |                                                                                                 |                         |    |    |   |   |   |   |
| FN1451  | -0.039                 | 14.819               | 7.148e-2 | 1.465e-1  | 120  | 139 | 164.4168   | 168.8442 | AAL95644.1  Cell division protein ftsZ                                                          |                         |    |    |   |   |   |   |
|         |                        |                      |          |           | 171  | 134 | 171.0000   | 175.7819 |                                                                                                 |                         |    |    |   |   |   |   |
| FN1452  | 0.036                  | 13.611               | 2.74e-1  | 8.416e-1  | 96   | 103 | 131.5334   | 125.1147 | AAL95645.1  Cell division protein ftsA                                                          |                         |    |    |   |   |   |   |
|         |                        |                      |          |           | 95   | 73  | 95.0000    | 95.7618  |                                                                                                 |                         |    |    |   |   |   |   |
| FN1454  | -0.702                 | 9.486                |          |           |      | 26  |            | 31.5824  | AAL95647.1  D-alanine--D-alanine ligase                                                         |                         |    |    |   |   |   |   |
|         |                        |                      |          |           | 21   | 28  | 21.0000    | 36.7305  |                                                                                                 |                         |    |    |   |   |   |   |
| FN1455  | 0.157                  | 8.630                | 1.9e-1   | 5.228e-1  | 19   | 17  | 26.0327    | 20.6500  | AAL95648.1  UDP-N-acetylenolpyruvylglucosamine reductase                                        |                         |    |    |   |   |   |   |
|         |                        |                      |          |           | 16   | 13  | 16.0000    | 17.0535  |                                                                                                 |                         |    |    |   |   |   |   |
| FN1456  | -0.507                 | 11.985               | 4.608e-3 | 4.063e-3  | 40   | 58  | 54.8056    | 70.4530  | AAL95649.1  UDP-N-acetylmuramate--alanine ligase                                                |                         |    |    |   |   |   |   |
|         |                        |                      |          |           | 52   | 62  | 52.0000    | 81.3319  |                                                                                                 |                         |    |    |   |   |   |   |
| FN1457  | -0.631                 | 11.388               | 8.193e-2 | 1.755e-1  | 14   | 51  | 19.1820    | 61.9500  | AAL95650.1  UDP-N-acetylglucosamine-N-acetylmuramyl-Pentapeptide pyrophosphoryl-undecaprenol N- |                         |    |    |   |   |   |   |
|         |                        |                      |          |           | 64   | 51  | 64.0000    | 66.9021  |                                                                                                 |                         |    |    |   |   |   |   |
| FN1458  | 0.050                  | 12.577               | 2.882e-1 | 9.029e-1  | 84   | 66  | 115.0917   | 80.1706  | AAL95651.1  UDP-N-acetylmuramoylalanine--D-glutamate ligase                                     |                         |    |    |   |   |   |   |
|         |                        |                      |          |           | 44   | 56  | 44.0000    | 73.4611  |                                                                                                 |                         |    |    |   |   |   |   |
| FN1459  |                        |                      |          |           |      |     |            |          | AAL95652.1  Phospho-N-acetylmuramoyl-pentapeptide-transferase                                   |                         |    |    |   |   |   |   |
|         |                        |                      |          |           |      | 12  |            | 15.7417  |                                                                                                 |                         |    |    |   |   |   |   |
| FN1461  | -0.759                 | 10.290               | 5.368e-8 | 4.345e-10 | 20   | 38  | 27.4028    | 46.1588  | AAL95654.1  Histidinol-phosphatase                                                              |                         |    |    |   |   |   |   |
|         |                        |                      |          |           | 27   | 35  | 27.0000    | 45.9132  |                                                                                                 |                         |    |    |   |   |   |   |
| FN1463  | 0.182                  | 16.609               | 1.215e-1 | 2.9e-1    | 285  | 236 | 390.4899   | 286.6707 | AAL95656.1  pyridoxine biosynthesis protein                                                     |                         |    |    |   |   |   |   |
|         |                        |                      |          |           | 283  | 234 | 283.0000   | 306.9624 |                                                                                                 |                         |    |    |   |   |   |   |
| FN1464  | -0.124                 | 15.788               | 2.528e-1 | 7.543e-1  | 91   | 209 | 124.6827   | 253.8736 | AAL95657.1  1-deoxyxylulose-5-phosphate synthase                                                |                         |    |    |   |   |   |   |
|         |                        |                      |          |           | 331  | 185 | 331.0000   | 242.6840 |                                                                                                 |                         |    |    |   |   |   |   |
| FN1470  | -2.269                 | 10.228               | 3.663e-4 | 9.386e-5  | 15   | 69  | 20.5521    | 83.8147  | AAL95663.1  Hypothetical protein                                                                |                         |    |    |   |   |   |   |
|         |                        |                      |          |           | 11   | 52  | 11.0000    | 68.2139  |                                                                                                 |                         |    |    |   |   |   |   |
| FN1471  |                        |                      |          |           |      | 8   |            | 9.7176   | AAL95664.1  LACI-family transcription regulator                                                 |                         |    |    |   |   |   |   |
|         |                        |                      |          |           |      | 15  |            | 19.6771  |                                                                                                 |                         |    |    |   |   |   |   |
| FN1472  | -3.274                 | 12.762               | 4.674e-4 | 1.384e-4  | 7    | 239 | 9.5910     | 290.3148 | AAL95665.1  N-acetylneuraminate-binding protein                                                 |                         |    |    |   |   |   |   |
|         |                        |                      |          |           | 44   | 174 | 44.0000    | 228.2541 |                                                                                                 |                         |    |    |   |   |   |   |

Show detected proteins only  
 Show all proteins  
 Filter by category:

Proteins found: 1338

Enter (or paste) list of ORFs

Find ORFs

Test Cutoff

q-Value

p-Value

.005

| Signif | Direction | Applies To   |
|--------|-----------|--------------|
| yes    | +         | ratios, bars |
| no     | n/a       | bars         |
| yes    | -         | ratios, bars |
| yes    | +         | p-, q-Values |
| yes    | -         | p-, q-Values |

Dot Plots Dot Plots

Fn Summary Table

FnPg vs Fn

FnSg vs Fn

FnPgSg vs Fn

FnPgSg vs FnPg

FnSg vs FnPg

FnPgSg vs FnSg

Fn Coverage

| Protein | FnPg vs Fn             |                      |          |          | Raw  |     | Normalized |          | Description                                                          | Log <sub>2</sub> Ratios |    |    |   |   |   |   |
|---------|------------------------|----------------------|----------|----------|------|-----|------------|----------|----------------------------------------------------------------------|-------------------------|----|----|---|---|---|---|
|         | Log <sub>2</sub> Ratio | Log <sub>2</sub> Sum | q-Value  | p-Value  | FnPg | Fn  | FnPg       | Fn       |                                                                      | -6                      | -4 | -2 | 0 | 2 | 4 | 6 |
| FN1474  |                        |                      |          |          |      | 8   |            | 9.7176   | AAL95667.1  N-acetylmannosamine kinase                               |                         |    |    |   |   |   |   |
|         |                        |                      |          |          |      | 7   |            | 9.1826   |                                                                      |                         |    |    |   |   |   |   |
| FN1475  | -1.481                 | 9.773                | 5.317e-3 | 4.94e-3  | 20   | 36  | 27.4028    | 43.7294  | AAL95668.1  N-acetylneuraminate lyase                                |                         |    |    |   |   |   |   |
|         |                        |                      |          |          | 8    | 42  | 8.0000     | 55.0958  |                                                                      |                         |    |    |   |   |   |   |
| FN1476  |                        |                      |          |          |      | 19  |            | 23.0794  | AAL95669.1  N-acetylmannosamine-6-phosphate 2-epimerase              |                         |    |    |   |   |   |   |
|         |                        |                      |          |          |      | 18  |            | 23.6125  |                                                                      |                         |    |    |   |   |   |   |
| FN1478  |                        |                      |          |          |      |     |            |          | AAL95671.1  Hypothetical protein                                     |                         |    |    |   |   |   |   |
|         |                        |                      |          |          | 23   |     | 23.0000    |          |                                                                      |                         |    |    |   |   |   |   |
| FN1479  | -0.899                 | 9.593                | 1.151e-2 | 1.341e-2 | 10   | 29  | 13.7014    | 35.2265  | AAL95672.1  Hypothetical protein                                     |                         |    |    |   |   |   |   |
|         |                        |                      |          |          | 27   | 31  | 27.0000    | 40.6660  |                                                                      |                         |    |    |   |   |   |   |
| FN1480  | -0.025                 | 8.554                | 2.755e-1 | 8.479e-1 | 12   | 16  | 16.4417    | 19.4353  | AAL95673.1  MG2+ transporter MGTE                                    |                         |    |    |   |   |   |   |
|         |                        |                      |          |          | 22   | 15  | 22.0000    | 19.6771  |                                                                      |                         |    |    |   |   |   |   |
| FN1481  | 0.921                  | 6.728                | 7.301e-3 | 7.657e-3 | 9    | 8   | 12.3313    | 9.7176   | AAL95674.1  Queuine tRNA-ribosyltransferase                          |                         |    |    |   |   |   |   |
|         |                        |                      |          |          | 16   | 4   | 16.0000    | 5.2472   |                                                                      |                         |    |    |   |   |   |   |
| FN1482  | -0.212                 | 11.556               | 1.174e-1 | 2.775e-1 | 35   | 40  | 47.9549    | 48.5882  | AAL95675.1  Guanosine-3',5'-bis(Diphosphate) 3'-pyrophosphohydrolase |                         |    |    |   |   |   |   |
|         |                        |                      |          |          | 54   | 53  | 54.0000    | 69.5257  |                                                                      |                         |    |    |   |   |   |   |
| FN1483  | -0.713                 | 10.454               | 9.174e-4 | 4.111e-4 | 23   | 39  | 31.5132    | 47.3735  | AAL95676.1  Adenine phosphoribosyltransferase                        |                         |    |    |   |   |   |   |
|         |                        |                      |          |          | 27   | 37  | 27.0000    | 48.5368  |                                                                      |                         |    |    |   |   |   |   |
| FN1484  |                        |                      |          |          |      | 9   |            | 10.9324  | AAL95677.1  Tetratricopeptide repeat family protein                  |                         |    |    |   |   |   |   |
|         |                        |                      |          |          |      | 13  |            | 17.0535  |                                                                      |                         |    |    |   |   |   |   |
| FN1486  |                        |                      |          |          |      | 5   |            | 6.0735   | AAL95679.1  magnesium and cobalt efflux protein CorC                 |                         |    |    |   |   |   |   |
|         |                        |                      |          |          |      | 6   |            | 7.8708   |                                                                      |                         |    |    |   |   |   |   |
| FN1487  | -1.415                 | 14.595               | 4.163e-3 | 3.513e-3 | 45   | 207 | 61.6563    | 251.4442 | AAL95681.1  Chorismate mutase                                        |                         |    |    |   |   |   |   |
|         |                        |                      |          |          | 131  | 200 | 131.0000   | 262.3611 |                                                                      |                         |    |    |   |   |   |   |
| FN1488  |                        |                      |          |          | 22   |     | 30.1431    |          | AAL95682.1  Methylenetetrahydrofolate dehydrogenase (NADP+)          |                         |    |    |   |   |   |   |
|         |                        |                      |          |          | 12   |     | 12.0000    |          |                                                                      |                         |    |    |   |   |   |   |
| FN1489  | -0.585                 | 9.086                | 2.168e-2 | 2.997e-2 | 11   | 20  | 15.0715    | 24.2941  | AAL95683.1  Methionyl-tRNA formyltransferase                         |                         |    |    |   |   |   |   |
|         |                        |                      |          |          | 23   | 25  | 23.0000    | 32.7951  |                                                                      |                         |    |    |   |   |   |   |
| FN1490  | 0.744                  | 7.459                | 5.827e-2 | 1.111e-1 | 9    | 5   | 12.3313    | 6.0735   | AAL95684.1  putative regulatory protein                              |                         |    |    |   |   |   |   |
|         |                        |                      |          |          | 22   | 11  | 22.0000    | 14.4299  |                                                                      |                         |    |    |   |   |   |   |
| FN1491  | -1.070                 | 7.713                |          |          |      |     |            |          | AAL95685.1  PTS system, IIA component                                |                         |    |    |   |   |   |   |
|         |                        |                      |          |          | 10   | 16  | 10.0000    | 20.9889  |                                                                      |                         |    |    |   |   |   |   |

Show detected proteins only  
 Show all proteins  
 Filter by category:

Proteins found: 1338

Test Cutoff

| Signif | Direction | Applies To   |
|--------|-----------|--------------|
| yes    | +         | ratios, bars |
| no     | n/a       | bars         |
| yes    | -         | ratios, bars |
| yes    | +         | p-, q-Values |
| yes    | -         |              |

Fn Summary Table

FnPg vs Fn

FnSg vs Fn

FnPgSg vs Fn

FnPgSg vs FnPg

FnSg vs FnPg

FnPgSg vs FnSg

Fn Coverage

| Protein | FnPg vs Fn             |                      |          |          | Raw  |     | Normalized |          | Description                                                       | Log <sub>2</sub> Ratios |    |    |   |   |   |   |
|---------|------------------------|----------------------|----------|----------|------|-----|------------|----------|-------------------------------------------------------------------|-------------------------|----|----|---|---|---|---|
|         | Log <sub>2</sub> Ratio | Log <sub>2</sub> Sum | q-Value  | p-Value  | FnPg | Fn  | FnPg       | Fn       |                                                                   | -6                      | -4 | -2 | 0 | 2 | 4 | 6 |
| FN1493  | -1.101                 | 7.965                | 1.442e-2 | 1.768e-2 | 7    | 23  | 9.5910     | 27.9382  | AAL95687.1  Hypothetical protein                                  |                         |    |    |   |   |   |   |
|         |                        |                      |          |          | 12   | 14  | 12.0000    | 18.3653  |                                                                   |                         |    |    |   |   |   |   |
| FN1494  | -1.569                 | 8.212                |          |          |      | 24  |            | 29.1529  | AAL95680.1  Rod shape-determining protein mreC                    |                         |    |    |   |   |   |   |
|         |                        |                      |          |          | 10   | 23  | 10.0000    | 30.1715  |                                                                   |                         |    |    |   |   |   |   |
| FN1496  | -1.569                 | 8.212                |          |          |      | 24  |            | 29.1529  | AAL95680.1  Rod shape-determining protein mreC                    |                         |    |    |   |   |   |   |
|         |                        |                      |          |          | 10   | 23  | 10.0000    | 30.1715  |                                                                   |                         |    |    |   |   |   |   |
| FN1499  | -0.356                 | 11.888               | 1.919e-1 | 5.294e-1 | 13   | 65  | 17.8118    | 78.9559  | AAL93625.1  Cell surface protein                                  |                         |    |    |   |   |   |   |
|         |                        |                      |          |          | 91   | 46  | 91.0000    | 60.3430  |                                                                   |                         |    |    |   |   |   |   |
| FN1504  | -1.567                 | 13.803               | 5.632e-5 | 5.926e-6 | 43   | 179 | 58.9160    | 217.4324 | AAL93630.1  Nickel-binding protein                                |                         |    |    |   |   |   |   |
|         |                        |                      |          |          | 80   | 148 | 80.0000    | 194.1472 |                                                                   |                         |    |    |   |   |   |   |
| FN1505  | -0.020                 | 16.220               | 2.836e-1 | 8.827e-1 | 172  | 215 | 235.6641   | 261.1618 | AAL93631.1  6,7-dimethyl-8-ribityllumazine synthase               |                         |    |    |   |   |   |   |
|         |                        |                      |          |          | 313  | 225 | 313.0000   | 295.1562 |                                                                   |                         |    |    |   |   |   |   |
| FN1506  | 0.684                  | 7.889                |          |          | 19   | 10  | 26.0327    | 12.1471  | AAL93632.1  Diaminohydroxyphosphoribosylaminopyrimidine deaminase |                         |    |    |   |   |   |   |
|         |                        |                      |          |          | 13   |     | 13.0000    |          |                                                                   |                         |    |    |   |   |   |   |
| FN1508  | 0.227                  | 13.127               | 1.712e-1 | 4.533e-1 | 53   | 77  | 72.6174    | 93.5324  | AAL93634.1  GTP cyclohydrolase II                                 |                         |    |    |   |   |   |   |
|         |                        |                      |          |          | 132  | 62  | 132.0000   | 81.3319  |                                                                   |                         |    |    |   |   |   |   |
| FN1512  |                        |                      |          |          |      | 11  |            | 13.3618  | AAL93638.1  hypothetical exported 24-amino acid repeat protein    |                         |    |    |   |   |   |   |
|         |                        |                      |          |          |      | 8   |            | 10.4944  |                                                                   |                         |    |    |   |   |   |   |
| FN1517  | -0.545                 | 15.824               | 4.167e-2 | 6.973e-2 | 102  | 262 | 139.7543   | 318.2530 | AAL93643.1  Leucyl-tRNA synthetase                                |                         |    |    |   |   |   |   |
|         |                        |                      |          |          | 259  | 201 | 259.0000   | 263.6729 |                                                                   |                         |    |    |   |   |   |   |
| FN1518  |                        |                      |          |          |      | 9   |            | 10.9324  | AAL93644.1  RNA polymerase sigma-H factor                         |                         |    |    |   |   |   |   |
|         |                        |                      |          |          |      | 6   |            | 7.8708   |                                                                   |                         |    |    |   |   |   |   |
| FN1519  | -0.956                 | 8.357                |          |          |      | 21  |            | 25.5088  | AAL93645.1  23S rRNA methyltransferase                            |                         |    |    |   |   |   |   |
|         |                        |                      |          |          | 13   | 19  | 13.0000    | 24.9243  |                                                                   |                         |    |    |   |   |   |   |
| FN1520  | -1.151                 | 10.981               | 2.418e-2 | 3.44e-2  | 9    | 52  | 12.3313    | 63.1647  | AAL93646.1  UDP-N-acetylglucosamine 1-carboxyvinyltransferase     |                         |    |    |   |   |   |   |
|         |                        |                      |          |          | 48   | 54  | 48.0000    | 70.8375  |                                                                   |                         |    |    |   |   |   |   |
| FN1521  |                        |                      |          |          |      | 15  |            | 18.2206  | AAL93647.1  Dipeptide transport system permease protein dppB      |                         |    |    |   |   |   |   |
|         |                        |                      |          |          |      | 16  |            | 20.9889  |                                                                   |                         |    |    |   |   |   |   |
| FN1523  | -2.022                 | 15.040               | 1.623e-5 | 9.748e-7 | 68   | 299 | 93.1695    | 363.1972 | AAL93649.1  Dipeptide-binding protein                             |                         |    |    |   |   |   |   |
|         |                        |                      |          |          | 89   | 287 | 89.0000    | 376.4881 |                                                                   |                         |    |    |   |   |   |   |
| FN1524  |                        |                      |          |          |      | 5   |            | 6.0735   | AAL93650.1  Dipeptide transport ATP-binding protein dppD          |                         |    |    |   |   |   |   |
|         |                        |                      |          |          |      |     |            |          |                                                                   |                         |    |    |   |   |   |   |

Show detected proteins only  
 Show all proteins  
 Filter by category:

Proteins found: 1338

Enter (or paste) list of ORFs

Find ORFs

Test Cutoff

q-Value

p-Value

.005

| Signif | Direction | Applies To   |
|--------|-----------|--------------|
| yes    | +         | ratios, bars |
| no     | n/a       | bars         |
| yes    | -         | ratios, bars |
| yes    | +         | p-, q-Values |
| yes    | -         |              |

Dot Plots Dot Plots

Fn Summary Table FnPg vs Fn FnSg vs Fn FnPgSg vs Fn FnPgSg vs FnPg FnSg vs FnPg FnPgSg vs FnSg Fn Coverage

| Protein | FnPg vs Fn             |                      |          |          | Raw  |      | Normalized |           | Description                                                                     | Log <sub>2</sub> Ratios |    |    |   |   |   |   |
|---------|------------------------|----------------------|----------|----------|------|------|------------|-----------|---------------------------------------------------------------------------------|-------------------------|----|----|---|---|---|---|
|         | Log <sub>2</sub> Ratio | Log <sub>2</sub> Sum | q-Value  | p-Value  | FnPg | Fn   | FnPg       | Fn        |                                                                                 | -6                      | -4 | -2 | 0 | 2 | 4 | 6 |
| FN1525  |                        |                      |          |          |      | 5    |            | 6.0735    | AAL93651.1  Dipeptide transport ATP-binding protein dppF                        |                         |    |    |   |   |   |   |
| FN1526  | -0.352                 | 22.555               | 1.721e-1 | 4.564e-1 | 2501 | 2415 | 3426.7198  | 2933.5155 | AAL93652.1  Fusobacterium outer membrane protein family                         |                         |    |    |   |   |   |   |
| FN1527  | -2.812                 | 12.685               | 4.914e-4 | 1.512e-4 | 25   | 164  | 34.2535    | 199.2118  | AAL93653.1  Hypothetical protein                                                |                         |    |    |   |   |   |   |
| FN1528  | -1.987                 | 13.504               | 7.129e-4 | 2.683e-4 | 52   | 173  | 71.2473    | 210.1442  | AAL93654.1  Hypothetical protein                                                |                         |    |    |   |   |   |   |
| FN1529  | -0.496                 | 12.897               | 1.244e-1 | 2.989e-1 | 84   | 79   | 115.0917   | 95.9618   | AAL93655.1  Hypothetical protein                                                |                         |    |    |   |   |   |   |
| FN1531  | 0.267                  | 9.845                | 1.848e-1 | 5.038e-1 | 15   | 25   | 20.5521    | 30.3677   | AAL93657.1  murein hydrolase export regulator                                   |                         |    |    |   |   |   |   |
| FN1533  | 0.427                  | 19.096               | 1.955e-1 | 5.418e-1 | 1043 | 534  | 1429.0559  | 648.6531  | AAL93659.1  Electron transfer flavoprotein alpha-subunit                        |                         |    |    |   |   |   |   |
| FN1534  | 0.680                  | 20.164               | 1.196e-1 | 2.84e-1  | 1502 | 657  | 2057.9500  | 798.0620  | AAL93660.1  Electron transfer flavoprotein beta-subunit                         |                         |    |    |   |   |   |   |
| FN1535  | 1.049                  | 21.288               | 4.761e-3 | 4.263e-3 | 1883 | 873  | 2579.9733  | 1060.4385 | AAL93661.1  Acyl-CoA dehydrogenase, short-chain specific                        |                         |    |    |   |   |   |   |
| FN1536  | 1.713                  | 19.223               | 2.984e-3 | 2.224e-3 | 905  | 369  | 1239.9766  | 448.2266  | AAL93662.1  (S)-2-hydroxy-acid oxidase chain D                                  |                         |    |    |   |   |   |   |
| FN1537  | -0.815                 | 5.724                |          |          | 4    | 4    | 5.4806     | 4.8588    | AAL93663.1  Arsenical pump-driving ATPase                                       |                         |    |    |   |   |   |   |
| FN1538  | -0.071                 | 7.783                | 2.556e-1 | 7.654e-1 | 8    | 11   | 10.9611    | 13.3618   | AAL93664.1  Arsenical pump-driving ATPase                                       |                         |    |    |   |   |   |   |
| FN1539  | 0.182                  | 16.003               | 1.694e-1 | 4.465e-1 | 246  | 205  | 337.0544   | 249.0148  | AAL93665.1  Iron-sulfur cluster-binding protein                                 |                         |    |    |   |   |   |   |
| FN1540  | 1.067                  | 16.840               | 2.35e-2  | 3.318e-2 | 450  | 205  | 616.5629   | 249.0148  | AAL93666.1  Iron-sulfur cluster-binding protein                                 |                         |    |    |   |   |   |   |
| FN1544  | 1.827                  | 17.153               | 4.206e-2 | 7.062e-2 | 762  | 162  | 1044.0466  | 196.7824  | AAL93670.1  Probable electron transfer flavoprotein-quinone oxidoreductase ydiS |                         |    |    |   |   |   |   |
| FN1545  | 2.272                  | 11.903               | 7.697e-2 | 1.614e-1 | 173  | 28   | 237.0342   | 34.0118   | AAL93671.1  Ferredoxin like protein                                             |                         |    |    |   |   |   |   |

Show detected proteins only  
 Show all proteins  
 Filter by category:

Proteins found: 1338

Test Cutoff

| Signif | Direction | Applies To   |
|--------|-----------|--------------|
| yes    | +         | ratios, bars |
| no     | n/a       | bars         |
| yes    | -         | ratios, bars |
| yes    | +         | p-, q-Values |
| yes    | -         |              |

Fn Summary Table FnPg vs Fn FnSg vs Fn FnPgSg vs Fn FnPgSg vs FnPg FnSg vs FnPg FnPgSg vs FnSg Fn Coverage

| Protein | FnPg vs Fn             |                      |          |          | Raw  |      | Normalized |           | Description                                                          | Log <sub>2</sub> Ratios |    |    |   |   |   |   |
|---------|------------------------|----------------------|----------|----------|------|------|------------|-----------|----------------------------------------------------------------------|-------------------------|----|----|---|---|---|---|
|         | Log <sub>2</sub> Ratio | Log <sub>2</sub> Sum | q-Value  | p-Value  | FnPg | Fn   | FnPg       | Fn        |                                                                      | -6                      | -4 | -2 | 0 | 2 | 4 | 6 |
| FN1546  | 1.071                  | 20.811               | 7.679e-2 | 1.609e-1 | 2138 | 730  | 2929.3590  | 886.7355  | AAL93672.1  Protein Translation Elongation Factor G (EF-G)           |                         |    |    |   |   |   |   |
|         |                        |                      |          |          | 1003 | 751  | 1003.0000  | 985.1658  |                                                                      |                         |    |    |   |   |   |   |
| FN1547  | -0.720                 | 14.595               | 5.234e-3 | 4.838e-3 | 76   | 165  | 104.1306   | 200.4265  | AAL93673.1  PTS permease for N-acetylglucosamine and glucose         |                         |    |    |   |   |   |   |
|         |                        |                      |          |          | 141  | 155  | 141.0000   | 203.3298  |                                                                      |                         |    |    |   |   |   |   |
| FN1548  | -0.490                 | 10.041               | 8.847e-4 | 3.888e-4 | 21   | 32   | 28.7729    | 38.8706   | AAL93674.1  Hypothetical protein                                     |                         |    |    |   |   |   |   |
|         |                        |                      |          |          | 26   | 29   | 26.0000    | 38.0424   |                                                                      |                         |    |    |   |   |   |   |
| FN1549  | -0.602                 | 19.011               | 6.144e-3 | 6.014e-3 | 362  | 667  | 495.9906   | 810.2090  | AAL93675.1  Stomatin like protein                                    |                         |    |    |   |   |   |   |
|         |                        |                      |          |          | 684  | 748  | 684.0000   | 981.2303  |                                                                      |                         |    |    |   |   |   |   |
| FN1552  | -1.922                 | 5.922                |          |          |      | 12   |            | 14.5765   | AAL93678.1  abortive phage resistance protein                        |                         |    |    |   |   |   |   |
|         |                        |                      |          |          | 4    | 12   | 4.0000     | 15.7417   |                                                                      |                         |    |    |   |   |   |   |
| FN1553  | -1.121                 | 7.900                | 2.257e-3 | 1.526e-3 | 8    | 17   | 10.9611    | 20.6500   | AAL93679.1  abortive phage resistance protein                        |                         |    |    |   |   |   |   |
|         |                        |                      |          |          | 10   | 19   | 10.0000    | 24.9243   |                                                                      |                         |    |    |   |   |   |   |
| FN1554  | -0.887                 | 16.740               | 1.18e-3  | 6.182e-4 | 158  | 337  | 216.4821   | 409.3560  | AAL93680.1  Fusobacterium outer membrane protein family              |                         |    |    |   |   |   |   |
|         |                        |                      |          |          | 270  | 374  | 270.0000   | 490.6152  |                                                                      |                         |    |    |   |   |   |   |
| FN1555  | -0.096                 | 23.668               | 1.81e-2  | 2.377e-2 | 2528 | 3198 | 3463.7135  | 3884.6305 | AAL93681.1  Protein Translation Elongation Factor Tu                 |                         |    |    |   |   |   |   |
|         |                        |                      |          |          | 3600 | 2792 | 3600.0000  | 3662.5603 |                                                                      |                         |    |    |   |   |   |   |
| FN1556  | -0.929                 | 20.112               | 1.178e-3 | 6.165e-4 | 621  | 1210 | 850.8568   | 1469.7945 | AAL93682.1  Protein Translation Elongation Factor G (EF-G)           |                         |    |    |   |   |   |   |
|         |                        |                      |          |          | 692  | 1119 | 692.0000   | 1467.9101 |                                                                      |                         |    |    |   |   |   |   |
| FN1557  | 0.863                  | 13.989               | 7.109e-7 | 1.726e-8 | 124  | 79   | 169.8973   | 95.9618   | AAL93683.1  SSU ribosomal protein S7P                                |                         |    |    |   |   |   |   |
|         |                        |                      |          |          | 174  | 71   | 174.0000   | 93.1382   |                                                                      |                         |    |    |   |   |   |   |
| FN1560  | -0.560                 | 13.953               | 1.565e-1 | 4.016e-1 | 12   | 133  | 16.4417    | 161.5559  | AAL93686.1  unknown                                                  |                         |    |    |   |   |   |   |
|         |                        |                      |          |          | 191  | 110  | 191.0000   | 144.2986  |                                                                      |                         |    |    |   |   |   |   |
| FN1562  | -1.156                 | 6.793                | 8.204e-3 | 8.941e-3 | 3    | 14   | 4.1104     | 17.0059   | AAL93688.1  Phospho-2-dehydro-3-deoxyheptonate aldolase              |                         |    |    |   |   |   |   |
|         |                        |                      |          |          | 10   | 11   | 10.0000    | 14.4299   |                                                                      |                         |    |    |   |   |   |   |
| FN1577  | 0.437                  | 15.288               | 1.17e-1  | 2.763e-1 | 112  | 134  | 153.4557   | 162.7706  | AAL93692.1  Rod shape-determining protein mreB                       |                         |    |    |   |   |   |   |
|         |                        |                      |          |          | 312  | 138  | 312.0000   | 181.0291  |                                                                      |                         |    |    |   |   |   |   |
| FN1579  | -0.033                 | 12.799               | 2.884e-1 | 9.037e-1 | 43   | 78   | 58.9160    | 94.7471   | AAL93694.1  CysteinyI-tRNA synthetase                                |                         |    |    |   |   |   |   |
|         |                        |                      |          |          | 108  | 58   | 108.0000   | 76.0847   |                                                                      |                         |    |    |   |   |   |   |
| FN1580  |                        |                      |          |          |      | 6    |            | 7.2882    | AAL93695.1  2-C-methyl-D-erythritol 4-phosphate cytidylyltransferase |                         |    |    |   |   |   |   |
|         |                        |                      |          |          |      |      |            |           |                                                                      |                         |    |    |   |   |   |   |
| FN1581  | -0.576                 | 10.825               | 1.57e-2  | 1.97e-2  | 21   | 37   | 28.7729    | 44.9441   | AAL93696.1  DNA mismatch repair protein mutS                         |                         |    |    |   |   |   |   |
|         |                        |                      |          |          | 41   | 45   | 41.0000    | 59.0312   |                                                                      |                         |    |    |   |   |   |   |

Show detected proteins only  
 Show all proteins  
 Filter by category:

Proteins found: 1338

Test Cutoff

| Signif | Direction | Applies To   |
|--------|-----------|--------------|
| yes    | +         | ratios, bars |
| no     | n/a       | bars         |
| yes    | -         | ratios, bars |
| yes    | +         | p-, q-Values |
| yes    | -         |              |

Fn Summary Table

FnPg vs Fn

FnSg vs Fn

FnPgSg vs Fn

FnPgSg vs FnPg

FnSg vs FnPg

FnPgSg vs FnSg

Fn Coverage

| Protein       | FnPg vs Fn             |                      |          |          | Raw  |      | Normalized |           | Description                                                      | Log <sub>2</sub> Ratios |    |    |   |   |   |   |
|---------------|------------------------|----------------------|----------|----------|------|------|------------|-----------|------------------------------------------------------------------|-------------------------|----|----|---|---|---|---|
|               | Log <sub>2</sub> Ratio | Log <sub>2</sub> Sum | q-Value  | p-Value  | FnPg | Fn   | FnPg       | Fn        |                                                                  | -6                      | -4 | -2 | 0 | 2 | 4 | 6 |
| <b>FN1582</b> | 0.608                  | 8.310                |          |          |      |      |            |           | AAL93697.1  Hypothetical protein                                 |                         |    |    |   |   |   |   |
|               |                        |                      |          |          | 22   | 11   | 22.0000    | 14.4299   |                                                                  |                         |    |    |   |   |   |   |
| <b>FN1586</b> |                        |                      |          |          |      |      |            |           | AAL93701.1  O-succinylbenzoate-CoA synthase                      |                         |    |    |   |   |   |   |
|               |                        |                      |          |          | 18   |      | 18.0000    |           |                                                                  |                         |    |    |   |   |   |   |
| <b>FN1589</b> | -1.771                 | 9.665                | 2.161e-3 | 1.443e-3 | 5    | 37   | 6.8507     | 44.9441   | AAL93704.1  LexA repressor                                       |                         |    |    |   |   |   |   |
|               |                        |                      |          |          | 24   | 46   | 24.0000    | 60.3430   |                                                                  |                         |    |    |   |   |   |   |
| <b>FN1590</b> |                        |                      |          |          |      |      |            |           | AAL93705.1  Hypothetical lipoprotein                             |                         |    |    |   |   |   |   |
|               |                        |                      |          |          | 5    |      | 5.0000     |           |                                                                  |                         |    |    |   |   |   |   |
| <b>FN1591</b> | -0.869                 | 15.690               | 1.049e-3 | 5.071e-4 | 141  | 247  | 193.1897   | 300.0324  | AAL93706.1  RNFB-related protein                                 |                         |    |    |   |   |   |   |
|               |                        |                      |          |          | 147  | 245  | 147.0000   | 321.3923  |                                                                  |                         |    |    |   |   |   |   |
| <b>FN1592</b> |                        |                      |          |          |      |      |            |           | AAL93707.1  Na(+)-translocating NADH-quinone reductase subunit D |                         |    |    |   |   |   |   |
|               |                        |                      |          |          | 13   |      | 13.0000    |           |                                                                  |                         |    |    |   |   |   |   |
| <b>FN1594</b> | -0.519                 | 11.095               | 2.673e-2 | 3.9e-2   | 22   | 49   | 30.1431    | 59.5206   | AAL93709.1  Nitrogen fixation protein RNFG                       |                         |    |    |   |   |   |   |
|               |                        |                      |          |          | 48   | 40   | 48.0000    | 52.4722   |                                                                  |                         |    |    |   |   |   |   |
| <b>FN1595</b> | 0.081                  | 14.238               | 2.867e-1 | 8.961e-1 | 35   | 121  | 47.9549    | 146.9795  | AAL93710.1  Na(+)-translocating NADH-quinone reductase subunit B |                         |    |    |   |   |   |   |
|               |                        |                      |          |          | 238  | 94   | 238.0000   | 123.3097  |                                                                  |                         |    |    |   |   |   |   |
| <b>FN1596</b> | -0.888                 | 19.764               | 2.767e-2 | 4.074e-2 | 722  | 1055 | 989.2410   | 1281.5151 | AAL93711.1  Nitrogen fixation iron-sulphur protein RNFC          |                         |    |    |   |   |   |   |
|               |                        |                      |          |          | 398  | 980  | 398.0000   | 1285.5692 |                                                                  |                         |    |    |   |   |   |   |
| <b>FN1597</b> | 0.789                  | 8.764                |          |          | 20   | 11   | 27.4028    | 13.3618   | AAL93712.1  Peptidyl-tRNA hydrolase                              |                         |    |    |   |   |   |   |
|               |                        |                      |          |          |      | 14   |            | 18.3653   |                                                                  |                         |    |    |   |   |   |   |
| <b>FN1600</b> | 0.594                  | 6.325                |          |          |      | 6    |            | 7.2882    | AAL93715.1  tRNA pseudouridine synthase A                        |                         |    |    |   |   |   |   |
|               |                        |                      |          |          | 11   |      | 11.0000    |           |                                                                  |                         |    |    |   |   |   |   |
| <b>FN1601</b> |                        |                      |          |          |      | 4    |            | 5.2472    | AAL93716.1  Hypothetical cytosolic protein                       |                         |    |    |   |   |   |   |
|               |                        |                      |          |          |      |      |            |           |                                                                  |                         |    |    |   |   |   |   |
| <b>FN1603</b> | -2.122                 | 7.031                |          |          | 4    | 22   | 5.4806     | 26.7235   | AAL93718.1  2',3'-cyclic nucleotide 3'-phosphodiesterase         |                         |    |    |   |   |   |   |
|               |                        |                      |          |          |      | 16   |            | 20.9889   |                                                                  |                         |    |    |   |   |   |   |
| <b>FN1605</b> | -0.300                 | 16.736               | 7.979e-2 | 1.693e-1 | 169  | 314  | 231.5536   | 381.4178  | AAL93720.1  Adenylosuccinate synthetase                          |                         |    |    |   |   |   |   |
|               |                        |                      |          |          | 364  | 268  | 364.0000   | 351.5638  |                                                                  |                         |    |    |   |   |   |   |
| <b>FN1606</b> | -1.640                 | 10.113               | 4.178e-4 | 1.15e-4  | 10   | 46   | 13.7014    | 55.8765   | AAL93721.1  3-deoxy-D-manno-octulosonic-acid transferase         |                         |    |    |   |   |   |   |
|               |                        |                      |          |          | 24   | 47   | 24.0000    | 61.6548   |                                                                  |                         |    |    |   |   |   |   |
| <b>FN1607</b> | -0.404                 | 8.668                | 4.08e-2  | 6.775e-2 | 11   | 22   | 15.0715    | 26.7235   | AAL93722.1  Cytidylate kinase                                    |                         |    |    |   |   |   |   |
|               |                        |                      |          |          | 20   | 15   | 20.0000    | 19.6771   |                                                                  |                         |    |    |   |   |   |   |

Show detected proteins only  
 Show all proteins  
 Filter by category:

Proteins found:  
1338

Test Cutoff

| Signif | Direction | Applies To   |
|--------|-----------|--------------|
| yes    | +         | ratios, bars |
| no     | n/a       | bars         |
| yes    | -         | ratios, bars |
| yes    | +         | p-, q-Values |
| yes    | -         | p-, q-Values |



Fn Summary Table FnPg vs Fn FnSg vs Fn FnPgSg vs Fn FnPgSg vs FnPg FnSg vs FnPg FnPgSg vs FnSg Fn Coverage

| Protein       | FnPg vs Fn             |                      |          |          | Raw  |      | Normalized |           | Description                                          | Log <sub>2</sub> Ratios |    |    |   |   |   |   |
|---------------|------------------------|----------------------|----------|----------|------|------|------------|-----------|------------------------------------------------------|-------------------------|----|----|---|---|---|---|
|               | Log <sub>2</sub> Ratio | Log <sub>2</sub> Sum | q-Value  | p-Value  | FnPg | Fn   | FnPg       | Fn        |                                                      | -6                      | -4 | -2 | 0 | 2 | 4 | 6 |
| <b>FN1608</b> |                        |                      |          |          | 8    |      | 8.0000     |           | AAL93723.1  Ribosomal protein L11 methyltransferase  |                         |    |    |   |   |   |   |
| <b>FN1609</b> | -2.360                 | 9.530                |          |          | 12   | 43   | 12.0000    | 56.4076   | AAL93724.1  Hypothetical protein                     |                         |    |    |   |   |   |   |
| <b>FN1610</b> | 0.674                  | 9.850                | 5.91e-4  | 1.98e-4  | 29   | 18   | 39.7341    | 21.8647   | AAL93725.1  33 kDa chaperonin                        |                         |    |    |   |   |   |   |
| <b>FN1611</b> |                        |                      |          |          |      |      |            | 3.9354    | AAL93726.1  Competence protein                       |                         |    |    |   |   |   |   |
| <b>FN1613</b> | -0.193                 | 8.730                | 2.094e-2 | 2.87e-2  | 15   | 19   | 20.5521    | 23.0794   | AAL93728.1  Hypothetical protein                     |                         |    |    |   |   |   |   |
| <b>FN1614</b> | -0.398                 | 10.108               | 6.677e-2 | 1.343e-1 | 24   | 25   | 32.8834    | 30.3677   | AAL93729.1  MG(2+) chelatase family protein          |                         |    |    |   |   |   |   |
| <b>FN1616</b> | -0.145                 | 8.145                |          |          |      | 14   |            | 17.0059   | AAL93731.1  N utilization substance protein B        |                         |    |    |   |   |   |   |
| <b>FN1618</b> | 0.013                  | 10.298               | 3.024e-1 | 9.667e-1 | 17   | 29   | 23.2924    | 35.2265   | AAL93733.1  Hypothetical protein                     |                         |    |    |   |   |   |   |
| <b>FN1619</b> | 1.079                  | 14.402               | 5.791e-3 | 5.542e-3 | 134  | 90   | 183.5987   | 109.3236  | AAL93734.1  Hypothetical cytosolic protein           |                         |    |    |   |   |   |   |
| <b>FN1620</b> | -0.686                 | 18.440               | 3.672e-2 | 5.888e-2 | 468  | 589  | 641.2254   | 715.4620  | AAL93735.1  SSU ribosomal protein S2P                |                         |    |    |   |   |   |   |
| <b>FN1621</b> | -0.815                 | 20.738               | 1.155e-2 | 1.346e-2 | 923  | 1389 | 1264.6391  | 1687.2269 | AAL93736.1  Protein Translation Elongation Factor Ts |                         |    |    |   |   |   |   |
| <b>FN1622</b> | -1.405                 | 14.538               | 1.889e-3 | 1.184e-3 | 53   | 207  | 72.6174    | 251.4442  | AAL93737.1  Uridylate kinase                         |                         |    |    |   |   |   |   |
| <b>FN1623</b> | -1.639                 | 12.064               | 1.382e-3 | 7.695e-4 | 22   | 107  | 30.1431    | 129.9736  | AAL93738.1  Ribosome Recycling Factor (RRF)          |                         |    |    |   |   |   |   |
| <b>FN1624</b> | -2.007                 | 10.926               |          |          |      | 70   |            | 85.0294   | AAL93739.1  Protein translocase subunit secY         |                         |    |    |   |   |   |   |
| <b>FN1625</b> | -1.012                 | 13.664               | 1.985e-2 | 2.686e-2 | 85   | 140  | 116.4619   | 170.0589  | AAL93740.1  LSU ribosomal protein L15P               |                         |    |    |   |   |   |   |
| <b>FN1626</b> | -3.376                 | 9.716                |          |          |      | 75   |            | 91.1030   | AAL93741.1  LSU ribosomal protein L30P               |                         |    |    |   |   |   |   |

Show detected proteins only  
 Show all proteins  
 Filter by category:

Proteins found: 1338

Enter (or paste) list of ORFs

Find ORFs

Test Cutoff

q-Value .005

p-Value

| Signif | Direction | Applies To   |
|--------|-----------|--------------|
| yes    | +         | ratios, bars |
| no     | n/a       | bars         |
| yes    | -         | ratios, bars |
| yes    | +         | p-, q-Values |
| yes    | -         |              |

Dot Plots Dot Plots

Fn Summary Table FnPg vs Fn FnSg vs Fn FnPgSg vs Fn FnPgSg vs FnPg FnSg vs FnPg FnPgSg vs FnSg Fn Coverage

| Protein | FnPg vs Fn             |                      |          |          | Raw  |     | Normalized |           | Description                            | Log <sub>2</sub> Ratios |    |    |   |   |   |   |
|---------|------------------------|----------------------|----------|----------|------|-----|------------|-----------|----------------------------------------|-------------------------|----|----|---|---|---|---|
|         | Log <sub>2</sub> Ratio | Log <sub>2</sub> Sum | q-Value  | p-Value  | FnPg | Fn  | FnPg       | Fn        |                                        | -6                      | -4 | -2 | 0 | 2 | 4 | 6 |
| FN1627  | -0.912                 | 16.987               | 2.226e-4 | 4.499e-5 | 193  | 397 | 264.4370   | 482.2384  | AAL93742.1  SSU ribosomal protein S5P  |                         |    |    |   |   |   |   |
|         |                        |                      |          |          | 261  | 386 | 261.0000   | 506.3568  |                                        |                         |    |    |   |   |   |   |
| FN1628  | 0.419                  | 15.521               |          |          | 183  | 177 | 250.7356   | 215.0030  | AAL93743.1  LSU ribosomal protein L18P |                         |    |    |   |   |   |   |
|         |                        |                      |          |          |      | 122 |            | 160.0402  |                                        |                         |    |    |   |   |   |   |
| FN1629  | -0.876                 | 17.655               | 3.913e-2 | 6.405e-2 | 369  | 524 | 505.5816   | 636.5061  | AAL93744.1  LSU ribosomal protein L6P  |                         |    |    |   |   |   |   |
|         |                        |                      |          |          | 165  | 453 | 165.0000   | 594.2478  |                                        |                         |    |    |   |   |   |   |
| FN1630  | -0.713                 | 13.210               | 1.009e-3 | 4.763e-4 | 57   | 108 | 78.0980    | 131.1883  | AAL93745.1  SSU ribosomal protein S8P  |                         |    |    |   |   |   |   |
|         |                        |                      |          |          | 74   | 90  | 74.0000    | 118.0625  |                                        |                         |    |    |   |   |   |   |
| FN1631  | -1.281                 | 5.924                |          |          |      | 10  |            | 12.1471   | AAL93746.1  SSU ribosomal protein S14P |                         |    |    |   |   |   |   |
|         |                        |                      |          |          | 5    |     | 5.0000     |           |                                        |                         |    |    |   |   |   |   |
| FN1632  | -1.015                 | 16.452               | 7.678e-4 | 3.029e-4 | 152  | 367 | 208.2613   | 445.7972  | AAL93747.1  LSU ribosomal protein L5P  |                         |    |    |   |   |   |   |
|         |                        |                      |          |          | 213  | 309 | 213.0000   | 405.3478  |                                        |                         |    |    |   |   |   |   |
| FN1634  | 0.794                  | 11.224               |          |          | 47   | 32  | 64.3966    | 38.8706   | AAL93749.1  LSU ribosomal protein L24P |                         |    |    |   |   |   |   |
|         |                        |                      |          |          |      | 27  |            | 35.4187   |                                        |                         |    |    |   |   |   |   |
| FN1635  | -1.370                 | 9.635                | 6.473e-5 | 7.232e-6 | 11   | 39  | 15.0715    | 47.3735   | AAL93750.1  LSU ribosomal protein L14P |                         |    |    |   |   |   |   |
|         |                        |                      |          |          | 20   | 33  | 20.0000    | 43.2896   |                                        |                         |    |    |   |   |   |   |
| FN1636  | -1.670                 | 10.912               | 5.613e-3 | 5.312e-3 | 6    | 76  | 8.2208     | 92.3177   | AAL93751.1  SSU ribosomal protein S17P |                         |    |    |   |   |   |   |
|         |                        |                      |          |          | 41   | 49  | 41.0000    | 64.2785   |                                        |                         |    |    |   |   |   |   |
| FN1637  |                        |                      |          |          |      | 18  |            | 21.8647   | AAL93752.1  LSU ribosomal protein L29P |                         |    |    |   |   |   |   |
|         |                        |                      |          |          |      | 57  |            | 74.7729   |                                        |                         |    |    |   |   |   |   |
| FN1638  | -2.223                 | 14.563               | 2.355e-4 | 4.924e-5 | 73   | 264 | 100.0202   | 320.6824  | AAL93753.1  LSU ribosomal protein L16P |                         |    |    |   |   |   |   |
|         |                        |                      |          |          | 44   | 268 | 44.0000    | 351.5638  |                                        |                         |    |    |   |   |   |   |
| FN1639  | -0.602                 | 19.260               | 3.975e-2 | 6.54e-2  | 619  | 778 | 848.1166   | 945.0414  | AAL93754.1  SSU ribosomal protein S3P  |                         |    |    |   |   |   |   |
|         |                        |                      |          |          | 438  | 768 | 438.0000   | 1007.4665 |                                        |                         |    |    |   |   |   |   |
| FN1640  | -0.669                 | 13.873               | 4.407e-2 | 7.534e-2 | 98   | 128 | 134.2737   | 155.4824  | AAL93755.1  LSU ribosomal protein L22P |                         |    |    |   |   |   |   |
|         |                        |                      |          |          | 60   | 117 | 60.0000    | 153.4812  |                                        |                         |    |    |   |   |   |   |
| FN1641  | -0.944                 | 14.982               | 3.583e-2 | 5.703e-2 | 147  | 225 | 201.4106   | 273.3089  | AAL93756.1  SSU ribosomal protein S19P |                         |    |    |   |   |   |   |
|         |                        |                      |          |          | 58   | 172 | 58.0000    | 225.6305  |                                        |                         |    |    |   |   |   |   |
| FN1642  | -1.187                 | 17.039               | 2.304e-2 | 3.236e-2 | 285  | 429 | 390.4899   | 521.1090  | AAL93757.1  LSU ribosomal protein L2P  |                         |    |    |   |   |   |   |
|         |                        |                      |          |          | 96   | 447 | 96.0000    | 586.3770  |                                        |                         |    |    |   |   |   |   |
| FN1643  | 0.230                  | 13.378               | 2.394e-1 | 7.017e-1 | 131  | 78  | 179.4883   | 94.7471   | AAL93758.1  LSU ribosomal protein L23P |                         |    |    |   |   |   |   |
|         |                        |                      |          |          | 44   | 73  | 44.0000    | 95.7618   |                                        |                         |    |    |   |   |   |   |

Show detected proteins only  
 Show all proteins  
 Filter by category:

Proteins found: 1338

Enter (or paste) list of ORFs

Find ORFs

Test Cutoff

q-Value

p-Value

| Signif      | Direction | Applies To |
|-------------|-----------|------------|
| red         | yes       | +          |
| yellow      | no        | n/a        |
| green       | yes       | -          |
| pink        | yes       | +          |
| light green | yes       | -          |

ratios, bars  
ratios, bars  
ratios, bars  
p-, q-Values

Dot Plots  Dot Plots

Fn Summary Table

FnPg vs Fn

FnSg vs Fn

FnPgSg vs Fn

FnPgSg vs FnPg

FnSg vs FnPg

FnPgSg vs FnSg

Fn Coverage

| Protein | FnPg vs Fn             |                      |          |          | Raw  |     | Normalized |           | Description                                     | Log <sub>2</sub> Ratios |    |    |   |   |   |   |
|---------|------------------------|----------------------|----------|----------|------|-----|------------|-----------|-------------------------------------------------|-------------------------|----|----|---|---|---|---|
|         | Log <sub>2</sub> Ratio | Log <sub>2</sub> Sum | q-Value  | p-Value  | FnPg | Fn  | FnPg       | Fn        |                                                 | -6                      | -4 | -2 | 0 | 2 | 4 | 6 |
| FN1644  | -0.619                 | 19.366               | 1.84e-2  | 2.429e-2 | 594  | 862 | 813.8631   | 1047.0768 | AAL93759.1  LSU ribosomal protein L1E           |                         |    |    |   |   |   |   |
|         |                        |                      |          |          | 513  | 755 | 513.0000   | 990.4130  |                                                 |                         |    |    |   |   |   |   |
| FN1645  | -1.468                 | 17.056               | 7.871e-3 | 8.459e-3 | 248  | 528 | 339.7947   | 641.3649  | AAL93760.1  LSU ribosomal protein L3P           |                         |    |    |   |   |   |   |
|         |                        |                      |          |          | 104  | 447 | 104.0000   | 586.3770  |                                                 |                         |    |    |   |   |   |   |
| FN1646  | -0.665                 | 15.556               | 5.081e-2 | 9.155e-2 | 180  | 223 | 246.6252   | 270.8795  | AAL93761.1  SSU ribosomal protein S10P          |                         |    |    |   |   |   |   |
|         |                        |                      |          |          | 102  | 215 | 102.0000   | 282.0381  |                                                 |                         |    |    |   |   |   |   |
| FN1647  | -0.316                 | 17.063               | 2.085e-1 | 5.874e-1 | 409  | 384 | 560.3872   | 466.4472  | AAL93762.1  Hypothetical protein                |                         |    |    |   |   |   |   |
|         |                        |                      |          |          | 103  | 274 | 103.0000   | 359.4346  |                                                 |                         |    |    |   |   |   |   |
| FN1652  | -1.992                 | 13.422               | 1.418e-4 | 2.337e-5 | 38   | 167 | 52.0653    | 202.8559  | AAL93767.1  Oligopeptide-binding protein oppA   |                         |    |    |   |   |   |   |
|         |                        |                      |          |          | 53   | 164 | 53.0000    | 215.1361  |                                                 |                         |    |    |   |   |   |   |
| FN1654  | 0.914                  | 10.762               | 9.644e-2 | 2.167e-1 | 20   | 23  | 27.4028    | 27.9382   | AAL93769.1  Hypothetical protein                |                         |    |    |   |   |   |   |
|         |                        |                      |          |          | 87   | 25  | 87.0000    | 32.7951   |                                                 |                         |    |    |   |   |   |   |
| FN1655  | -0.122                 | 12.930               | 2.315e-1 | 6.717e-1 | 82   | 74  | 112.3515   | 89.8883   | AAL93770.1  Hypothetical cytosolic protein      |                         |    |    |   |   |   |   |
|         |                        |                      |          |          | 57   | 72  | 57.0000    | 94.4500   |                                                 |                         |    |    |   |   |   |   |
| FN1657  | -0.914                 | 14.576               | 6.547e-2 | 1.308e-1 | 145  | 188 | 198.6703   | 228.3648  | AAL93772.1  SSU ribosomal protein S6P           |                         |    |    |   |   |   |   |
|         |                        |                      |          |          | 29   | 153 | 29.0000    | 200.7062  |                                                 |                         |    |    |   |   |   |   |
| FN1658  | -1.402                 | 14.043               | 1.551e-3 | 8.967e-4 | 59   | 188 | 80.8383    | 228.3648  | AAL93773.1  Prolyl-tRNA synthetase              |                         |    |    |   |   |   |   |
|         |                        |                      |          |          | 79   | 148 | 79.0000    | 194.1472  |                                                 |                         |    |    |   |   |   |   |
| FN1660  |                        |                      |          |          |      |     |            |           | AAL93775.1  ATP-dependent DNA helicase recG     |                         |    |    |   |   |   |   |
|         |                        |                      |          |          |      | 4   |            | 5.2472    |                                                 |                         |    |    |   |   |   |   |
| FN1661  | -0.541                 | 10.636               | 5.53e-2  | 1.03e-1  | 22   | 49  | 30.1431    | 59.5206   | AAL93776.1  Hypothetical cytosolic protein      |                         |    |    |   |   |   |   |
|         |                        |                      |          |          | 36   | 28  | 36.0000    | 36.7305   |                                                 |                         |    |    |   |   |   |   |
| FN1662  | -0.791                 | 9.927                | 1.872e-2 | 2.488e-2 | 12   | 33  | 16.4417    | 40.0853   | AAL93777.1  Hypothetical protein                |                         |    |    |   |   |   |   |
|         |                        |                      |          |          | 31   | 32  | 31.0000    | 41.9778   |                                                 |                         |    |    |   |   |   |   |
| FN1663  | -0.412                 | 6.752                |          |          |      | 10  |            | 12.1471   | AAL93778.1  Hypothetical protein                |                         |    |    |   |   |   |   |
|         |                        |                      |          |          | 9    | 9   | 9.0000     | 11.8062   |                                                 |                         |    |    |   |   |   |   |
| FN1666  |                        |                      |          |          |      |     |            |           | AAL93781.1  Hypothetical protein                |                         |    |    |   |   |   |   |
|         |                        |                      |          |          |      | 3   |            | 3.9354    |                                                 |                         |    |    |   |   |   |   |
| FN1667  |                        |                      |          |          | 3    |     | 4.1104     |           | AAL93782.1  dTDP-glucose 4,6-dehydratase        |                         |    |    |   |   |   |   |
|         |                        |                      |          |          |      |     |            |           |                                                 |                         |    |    |   |   |   |   |
| FN1668  |                        |                      |          |          |      |     |            |           | AAL93783.1  Cholinephosphate cytidyltransferase |                         |    |    |   |   |   |   |
|         |                        |                      |          |          | 5    |     | 5.0000     |           |                                                 |                         |    |    |   |   |   |   |

Show detected proteins only  
 Show all proteins  
 Filter by category:

Proteins found:  
1338

Test Cutoff

| Signif | Direction | Applies To   |
|--------|-----------|--------------|
| yes    | +         | ratios, bars |
| no     | n/a       | bars         |
| yes    | -         | ratios, bars |
| yes    | +         | p-, q-Values |
| yes    | -         | p-, q-Values |

Fn Summary Table FnPg vs Fn FnSg vs Fn FnPgSg vs Fn FnPgSg vs FnPg FnSg vs FnPg FnPgSg vs FnSg Fn Coverage

| Protein | FnPg vs Fn             |                      |          |          | Raw  |     | Normalized |          | Description                                                     | Log <sub>2</sub> Ratios |    |    |   |   |   |   |
|---------|------------------------|----------------------|----------|----------|------|-----|------------|----------|-----------------------------------------------------------------|-------------------------|----|----|---|---|---|---|
|         | Log <sub>2</sub> Ratio | Log <sub>2</sub> Sum | q-Value  | p-Value  | FnPg | Fn  | FnPg       | Fn       |                                                                 | -6                      | -4 | -2 | 0 | 2 | 4 | 6 |
| FN1670  | -1.175                 | 11.013               | 1.198e-3 | 6.347e-4 | 23   | 52  | 31.5132    | 63.1647  | AAL93785.1  Choline kinase                                      |                         |    |    |   |   |   |   |
|         |                        |                      |          |          | 29   | 56  | 29.0000    | 73.4611  |                                                                 | ■                       |    |    |   |   |   |   |
| FN1671  |                        |                      |          |          |      | 5   |            | 6.0735   | AAL93786.1  hypothetical exported protein                       |                         |    |    |   |   |   |   |
|         |                        |                      |          |          |      | 4   |            | 5.2472   |                                                                 |                         |    |    |   |   |   |   |
| FN1679  | 0.384                  | 17.222               | 8.534e-2 | 1.851e-1 | 249  | 258 | 341.1648   | 313.3942 | AAL93794.1  LPS biosynthesis protein WbpG                       |                         |    |    |   |   |   |   |
|         |                        |                      |          |          | 552  | 283 | 552.0000   | 371.2409 |                                                                 | ■                       |    |    |   |   |   |   |
| FN1683  | -1.996                 | 11.806               | 1.071e-4 | 1.503e-5 | 16   | 91  | 21.9222    | 110.5383 | AAL93798.1  Acetyltransferase                                   |                         |    |    |   |   |   |   |
|         |                        |                      |          |          | 38   | 98  | 38.0000    | 128.5569 |                                                                 | ■                       |    |    |   |   |   |   |
| FN1684  | 0.315                  | 16.924               | 1.126e-1 | 2.633e-1 | 358  | 257 | 490.5101   | 312.1795 | AAL93799.1  N-acetylneuraminate synthase                        |                         |    |    |   |   |   |   |
|         |                        |                      |          |          | 296  | 244 | 296.0000   | 320.0805 |                                                                 | ■                       |    |    |   |   |   |   |
| FN1685  | -0.127                 | 12.373               | 2.538e-1 | 7.584e-1 | 74   | 54  | 101.3903   | 65.5941  | AAL93800.1  dTDP-4-dehydrorhamnose reductase                    |                         |    |    |   |   |   |   |
|         |                        |                      |          |          | 38   | 66  | 38.0000    | 86.5791  |                                                                 | ■                       |    |    |   |   |   |   |
| FN1686  | 0.226                  | 15.857               | 2.062e-1 | 5.79e-1  | 270  | 182 | 369.9378   | 221.0765 | AAL93801.1  Spore coat polysaccharide biosynthesis protein spsF |                         |    |    |   |   |   |   |
|         |                        |                      |          |          | 157  | 175 | 157.0000   | 229.5659 |                                                                 | ■                       |    |    |   |   |   |   |
| FN1687  | -0.251                 | 15.505               | 7.081e-2 | 1.448e-1 | 147  | 221 | 201.4106   | 268.4501 | AAL93802.1  Gluconate 5-dehydrogenase                           |                         |    |    |   |   |   |   |
|         |                        |                      |          |          | 194  | 154 | 194.0000   | 202.0180 |                                                                 | ■                       |    |    |   |   |   |   |
| FN1688  | 1.263                  | 13.004               | 9.311e-2 | 2.07e-1  | 167  | 51  | 228.8134   | 61.9500  | AAL93803.1  Oxidoreductase                                      |                         |    |    |   |   |   |   |
|         |                        |                      |          |          | 52   | 42  | 52.0000    | 55.0958  |                                                                 | ■                       |    |    |   |   |   |   |
| FN1689  | -0.982                 | 17.502               | 4.804e-5 | 4.446e-6 | 241  | 484 | 330.2037   | 587.9178 | AAL93804.1  UDP-N-acetylglucosamine 4,6-dehydratase             |                         |    |    |   |   |   |   |
|         |                        |                      |          |          | 283  | 475 | 283.0000   | 623.1075 |                                                                 | ■                       |    |    |   |   |   |   |
| FN1690  | -0.698                 | 11.765               | 3.028e-2 | 4.573e-2 | 45   | 60  | 61.6563    | 72.8824  | AAL93805.1  Hypothetical protein                                |                         |    |    |   |   |   |   |
|         |                        |                      |          |          | 31   | 59  | 31.0000    | 77.3965  |                                                                 | ■                       |    |    |   |   |   |   |
| FN1692  | -1.382                 | 11.280               | 6.028e-4 | 2.042e-4 | 21   | 71  | 28.7729    | 86.2441  | AAL93807.1  Glycosyl transferase                                |                         |    |    |   |   |   |   |
|         |                        |                      |          |          | 33   | 57  | 33.0000    | 74.7729  |                                                                 | ■                       |    |    |   |   |   |   |
| FN1693  | -0.295                 | 8.291                | 1.261e-1 | 3.04e-1  | 8    | 15  | 10.9611    | 18.2206  | AAL93808.1  Hypothetical protein                                |                         |    |    |   |   |   |   |
|         |                        |                      |          |          | 21   | 16  | 21.0000    | 20.9889  |                                                                 | ■                       |    |    |   |   |   |   |
| FN1694  | -1.263                 | 12.735               | 6.092e-3 | 5.943e-3 | 53   | 108 | 72.6174    | 131.1883 | AAL93809.1  UDP-N-acetyl-D-quinovosamine 4-epimerase            |                         |    |    |   |   |   |   |
|         |                        |                      |          |          | 34   | 95  | 34.0000    | 124.6215 |                                                                 | ■                       |    |    |   |   |   |   |
| FN1695  | -1.327                 | 8.752                | 3.036e-3 | 2.28e-3  | 6    | 25  | 8.2208     | 30.3677  | AAL93810.1  Probable quinovosaminephosphotransferase            |                         |    |    |   |   |   |   |
|         |                        |                      |          |          | 18   | 27  | 18.0000    | 35.4187  |                                                                 | ■                       |    |    |   |   |   |   |
| FN1696  | -0.164                 | 14.848               | 1.569e-1 | 4.028e-1 | 93   | 147 | 127.4230   | 178.5618 | AAL93811.1  UDP-N-acetylglucosamine 4,6-dehydratase             |                         |    |    |   |   |   |   |
|         |                        |                      |          |          | 197  | 141 | 197.0000   | 184.9645 |                                                                 | ■                       |    |    |   |   |   |   |

Show detected proteins only  
 Show all proteins  
 Filter by category:

Proteins found: 1338

Test Cutoff

| Signif | Direction | Applies To   |
|--------|-----------|--------------|
| ■      | yes +     | ratios, bars |
| ■      | no n/a    | bars         |
| ■      | yes -     | ratios, bars |
| ■      | yes +     | p-, q-Values |
| ■      | yes -     |              |

Fn Summary Table

FnPg vs Fn

FnSg vs Fn

FnPgSg vs Fn

FnPgSg vs FnPg

FnSg vs FnPg

FnPgSg vs FnSg

Fn Coverage

| Protein | FnPg vs Fn             |                      |          |          | Raw  |     | Normalized |          | Description                                           | Log <sub>2</sub> Ratios |    |    |   |   |   |   |
|---------|------------------------|----------------------|----------|----------|------|-----|------------|----------|-------------------------------------------------------|-------------------------|----|----|---|---|---|---|
|         | Log <sub>2</sub> Ratio | Log <sub>2</sub> Sum | q-Value  | p-Value  | FnPg | Fn  | FnPg       | Fn       |                                                       | -6                      | -4 | -2 | 0 | 2 | 4 | 6 |
| FN1697  | -1.012                 | 14.080               | 1.832e-2 | 2.416e-2 | 36   | 136 | 49.3250    | 165.2000 | AAL93812.1  Hypothetical protein                      |                         |    |    |   |   |   |   |
|         |                        |                      |          |          | 136  | 159 | 136.0000   | 208.5770 |                                                       |                         |    |    |   |   |   |   |
| FN1698  | 0.660                  | 13.812               | 6.211e-2 | 1.22e-1  | 77   | 88  | 105.5008   | 106.8941 | AAL93813.1  dTDP-4-dehydrorhamnose reductase          |                         |    |    |   |   |   |   |
|         |                        |                      |          |          | 196  | 64  | 196.0000   | 83.9555  |                                                       |                         |    |    |   |   |   |   |
| FN1700  |                        |                      |          |          |      |     |            |          | AAL93815.1  Hypothetical protein                      |                         |    |    |   |   |   |   |
|         |                        |                      |          |          |      | 9   |            | 11.8062  |                                                       |                         |    |    |   |   |   |   |
| FN1701  | -0.897                 | 11.336               | 3.078e-3 | 2.325e-3 | 23   | 57  | 31.5132    | 69.2383  | AAL93816.1  ABC transporter ATP-binding protein       |                         |    |    |   |   |   |   |
|         |                        |                      |          |          | 43   | 53  | 43.0000    | 69.5257  |                                                       |                         |    |    |   |   |   |   |
| FN1703  | -0.139                 | 14.496               | 2.479e-1 | 7.349e-1 | 56   | 133 | 76.7278    | 161.5559 | AAL93818.1  ADP-L-glycero-D-manno-heptose-6-epimerase |                         |    |    |   |   |   |   |
|         |                        |                      |          |          | 213  | 120 | 213.0000   | 157.4166 |                                                       |                         |    |    |   |   |   |   |
| FN1704  | -1.213                 | 7.629                | 9.445e-3 | 1.06e-2  | 4    | 18  | 5.4806     | 21.8647  | AAL93819.1  Serine protease                           |                         |    |    |   |   |   |   |
|         |                        |                      |          |          | 13   | 16  | 13.0000    | 20.9889  |                                                       |                         |    |    |   |   |   |   |
| FN1707  |                        |                      |          |          |      | 7   |            | 8.5029   | AAL93822.1  Aldose 1-epimerase                        |                         |    |    |   |   |   |   |
|         |                        |                      |          |          |      | 4   |            | 5.2472   |                                                       |                         |    |    |   |   |   |   |
| FN1708  | -0.861                 | 18.285               | 2.669e-5 | 1.839e-6 | 294  | 634 | 402.8211   | 770.1237 | AAL93823.1  Polyribonucleotide nucleotidyltransferase |                         |    |    |   |   |   |   |
|         |                        |                      |          |          | 436  | 574 | 436.0000   | 752.9762 |                                                       |                         |    |    |   |   |   |   |
| FN1711  |                        |                      |          |          |      | 14  |            | 17.0059  | AAL93826.1  Methyltransferase                         |                         |    |    |   |   |   |   |
|         |                        |                      |          |          |      | 12  |            | 15.7417  |                                                       |                         |    |    |   |   |   |   |
| FN1713  | 0.483                  | 6.436                |          |          |      |     |            |          | AAL93828.1  tRNA (Uracil-5-) -methyltransferase       |                         |    |    |   |   |   |   |
|         |                        |                      |          |          | 11   | 6   | 11.0000    | 7.8708   |                                                       |                         |    |    |   |   |   |   |
| FN1715  |                        |                      |          |          |      |     |            |          | AAL93830.1  ATPase                                    |                         |    |    |   |   |   |   |
|         |                        |                      |          |          | 3    |     | 3.0000     |          |                                                       |                         |    |    |   |   |   |   |
| FN1717  | -2.038                 | 10.431               | 1.683e-4 | 2.964e-5 | 18   | 57  | 24.6625    | 69.2383  | AAL93832.1  NAD-dependent DNA ligase                  |                         |    |    |   |   |   |   |
|         |                        |                      |          |          | 12   | 62  | 12.0000    | 81.3319  |                                                       |                         |    |    |   |   |   |   |
| FN1718  | -1.083                 | 17.982               | 2.449e-4 | 5.252e-5 | 284  | 569 | 389.1197   | 691.1678 | AAL93833.1  Protein translocase subunit secA          |                         |    |    |   |   |   |   |
|         |                        |                      |          |          | 310  | 602 | 310.0000   | 789.7068 |                                                       |                         |    |    |   |   |   |   |
| FN1719  | -0.539                 | 16.963               | 1.975e-3 | 1.266e-3 | 238  | 341 | 326.0933   | 414.2148 | AAL93834.1  Hypothetical protein                      |                         |    |    |   |   |   |   |
|         |                        |                      |          |          | 267  | 341 | 267.0000   | 447.3256 |                                                       |                         |    |    |   |   |   |   |
| FN1722  |                        |                      |          |          |      | 7   |            | 8.5029   | AAL93837.1  Glucose inhibited division protein B      |                         |    |    |   |   |   |   |
|         |                        |                      |          |          |      | 4   |            | 5.2472   |                                                       |                         |    |    |   |   |   |   |
| FN1723  | -1.008                 | 12.769               | 4.075e-3 | 3.41e-3  | 40   | 86  | 54.8056    | 104.4647 | AAL93838.1  Glucose inhibited division protein A      |                         |    |    |   |   |   |   |
|         |                        |                      |          |          | 63   | 101 | 63.0000    | 132.4923 |                                                       |                         |    |    |   |   |   |   |

Show detected proteins only  
 Show all proteins  
 Filter by category:

Proteins found: 1338

Test Cutoff

| Signif | Direction | Applies To   |
|--------|-----------|--------------|
| yes    | +         | ratios, bars |
| no     | n/a       | bars         |
| yes    | -         | ratios, bars |
| yes    | +         | p-, q-Values |
| yes    | -         |              |

Fn Summary Table

FnPg vs Fn

FnSg vs Fn

FnPgSg vs Fn

FnPgSg vs FnPg

FnSg vs FnPg

FnPgSg vs FnSg

Fn Coverage

| Protein | FnPg vs Fn             |                      |          |          | Raw  |    | Normalized |          | Description                                          | Log <sub>2</sub> Ratios |    |    |   |   |   |   |
|---------|------------------------|----------------------|----------|----------|------|----|------------|----------|------------------------------------------------------|-------------------------|----|----|---|---|---|---|
|         | Log <sub>2</sub> Ratio | Log <sub>2</sub> Sum | q-Value  | p-Value  | FnPg | Fn | FnPg       | Fn       |                                                      | -6                      | -4 | -2 | 0 | 2 | 4 | 6 |
| FN1724  | 0.576                  | 8.057                |          |          | 5    | 11 | 6.8507     | 13.3618  | AAL93839.1  Potassium uptake protein KtrA            |                         |    |    |   |   |   |   |
|         |                        |                      |          |          | 33   |    | 33.0000    |          |                                                      |                         |    |    |   |   |   |   |
| FN1728  | -0.386                 | 8.629                | 1.038e-3 | 4.983e-4 | 13   | 18 | 17.8118    | 21.8647  | AAL93843.1  Pyrrolidone-carboxylate peptidase        |                         |    |    |   |   |   |   |
|         |                        |                      |          |          | 17   | 18 | 17.0000    | 23.6125  |                                                      |                         |    |    |   |   |   |   |
| FN1730  | -0.644                 | 8.109                | 2.431e-2 | 3.463e-2 | 7    | 18 | 9.5910     | 21.8647  | AAL93845.1  Para-aminobenzoate synthase component I  |                         |    |    |   |   |   |   |
|         |                        |                      |          |          | 17   | 15 | 17.0000    | 19.6771  |                                                      |                         |    |    |   |   |   |   |
| FN1731  |                        |                      |          |          | 7    |    | 9.5910     |          | AAL93846.1  Anthranilate synthase component II       |                         |    |    |   |   |   |   |
|         |                        |                      |          |          | 8    |    | 8.0000     |          |                                                      |                         |    |    |   |   |   |   |
| FN1732  | 0.941                  | 10.311               | 6.894e-2 | 1.399e-1 | 21   | 24 | 28.7729    | 29.1529  | AAL93847.1  Hypothetical protein                     |                         |    |    |   |   |   |   |
|         |                        |                      |          |          | 70   | 17 | 70.0000    | 22.3007  |                                                      |                         |    |    |   |   |   |   |
| FN1733  |                        |                      |          |          |      |    |            |          | AAL93848.1  V-type sodium ATP synthase subunit D     |                         |    |    |   |   |   |   |
|         |                        |                      |          |          | 8    |    | 8.0000     |          |                                                      |                         |    |    |   |   |   |   |
| FN1734  | 0.411                  | 13.885               | 1.689e-3 | 1.008e-3 | 99   | 86 | 135.6438   | 104.4647 | AAL93849.1  V-type sodium ATP synthase subunit B     |                         |    |    |   |   |   |   |
|         |                        |                      |          |          | 148  | 83 | 148.0000   | 108.8798 |                                                      |                         |    |    |   |   |   |   |
| FN1735  | 0.738                  | 12.791               | 8.608e-2 | 1.872e-1 | 47   | 49 | 64.3966    | 59.5206  | AAL93850.1  V-type sodium ATP synthase subunit A     |                         |    |    |   |   |   |   |
|         |                        |                      |          |          | 153  | 54 | 153.0000   | 70.8375  |                                                      |                         |    |    |   |   |   |   |
| FN1736  | 1.129                  | 8.712                | 3.761e-2 | 6.075e-2 | 15   | 12 | 20.5521    | 14.5765  | AAL93851.1  V-type sodium ATP synthase subunit A     |                         |    |    |   |   |   |   |
|         |                        |                      |          |          | 40   | 10 | 40.0000    | 13.1181  |                                                      |                         |    |    |   |   |   |   |
| FN1737  | -0.822                 | 5.498                | 5.269e-2 | 9.624e-2 | 3    | 5  | 4.1104     | 6.0735   | AAL93852.1  V-type sodium ATP synthase subunit G     |                         |    |    |   |   |   |   |
|         |                        |                      |          |          | 6    | 9  | 6.0000     | 11.8062  |                                                      |                         |    |    |   |   |   |   |
| FN1738  | 1.946                  | 11.018               | 3.79e-2  | 6.138e-2 | 94   | 22 | 128.7931   | 26.7235  | AAL93853.1  V-type sodium ATP synthase subunit C     |                         |    |    |   |   |   |   |
|         |                        |                      |          |          | 50   | 15 | 50.0000    | 19.6771  |                                                      |                         |    |    |   |   |   |   |
| FN1739  | 0.306                  | 5.733                |          |          | 6    |    | 8.2208     |          | AAL93854.1  V-type sodium ATP synthase subunit E     |                         |    |    |   |   |   |   |
|         |                        |                      |          |          | 8    | 5  | 8.0000     | 6.5590   |                                                      |                         |    |    |   |   |   |   |
| FN1740  |                        |                      |          |          |      |    |            |          | AAL93855.1  V-type sodium ATP synthase subunit K     |                         |    |    |   |   |   |   |
|         |                        |                      |          |          | 185  |    | 185.0000   |          |                                                      |                         |    |    |   |   |   |   |
| FN1741  | 0.670                  | 9.257                | 8.139e-3 | 8.846e-3 | 20   | 15 | 27.4028    | 18.2206  | AAL93856.1  V-type sodium ATP synthase subunit I     |                         |    |    |   |   |   |   |
|         |                        |                      |          |          | 35   | 16 | 35.0000    | 20.9889  |                                                      |                         |    |    |   |   |   |   |
| FN1742  |                        |                      |          |          | 9    |    | 12.3313    |          | AAL93857.1  V-type sodium ATP synthase subunit G     |                         |    |    |   |   |   |   |
|         |                        |                      |          |          | 8    |    | 8.0000     |          |                                                      |                         |    |    |   |   |   |   |
| FN1743  |                        |                      |          |          |      |    |            |          | AAL93858.1  Multidrug-efflux transporter 2 regulator |                         |    |    |   |   |   |   |
|         |                        |                      |          |          | 8    |    | 8.0000     |          |                                                      |                         |    |    |   |   |   |   |

Show detected proteins only  
 Show all proteins  
 Filter by category:

Proteins found: 1338

Enter (or paste) list of ORFs

Find ORFs

Test Cutoff

q-Value

p-Value

.005

| Signif | Direction | Applies To   |
|--------|-----------|--------------|
| yes    | +         | ratios, bars |
| no     | n/a       | bars         |
| yes    | -         | ratios, bars |
| yes    | +         | p-, q-Values |
| yes    | -         | p-, q-Values |

Dot Plots

Fn Summary Table

FnPg vs Fn

FnSg vs Fn

FnPgSg vs Fn

FnPgSg vs FnPg

FnSg vs FnPg

FnPgSg vs FnSg

Fn Coverage

| Protein | FnPg vs Fn             |                      |          |          | Raw  |      | Normalized |           | Description                                                      | Log <sub>2</sub> Ratios |    |    |   |   |   |   |
|---------|------------------------|----------------------|----------|----------|------|------|------------|-----------|------------------------------------------------------------------|-------------------------|----|----|---|---|---|---|
|         | Log <sub>2</sub> Ratio | Log <sub>2</sub> Sum | q-Value  | p-Value  | FnPg | Fn   | FnPg       | Fn        |                                                                  | -6                      | -4 | -2 | 0 | 2 | 4 | 6 |
| FN1745  | 2.072                  | 7.098                |          |          |      | 4    |            | 4.8588    | AAL93860.1  Cystathionine gamma-synthase                         |                         |    |    |   |   |   |   |
|         |                        |                      |          |          | 24   | 5    | 24.0000    | 6.5590    |                                                                  |                         |    |    |   |   |   |   |
| FN1746  |                        |                      |          |          |      |      |            |           | AAL93861.1  Cystathionine beta-lyase                             |                         |    |    |   |   |   |   |
|         |                        |                      |          |          | 7    |      | 7.0000     |           |                                                                  |                         |    |    |   |   |   |   |
| FN1754  |                        |                      |          |          |      |      |            |           | AAL93869.1  Thiazole biosynthesis protein thiG                   |                         |    |    |   |   |   |   |
|         |                        |                      |          |          | 11   |      | 15.0715    |           |                                                                  |                         |    |    |   |   |   |   |
| FN1763  | 1.959                  | 10.009               | 1.247e-2 | 1.477e-2 | 34   | 16   | 46.5848    | 19.4353   | AAL93876.1  Hypothetical cytosolic protein                       |                         |    |    |   |   |   |   |
|         |                        |                      |          |          | 80   | 10   | 80.0000    | 13.1181   |                                                                  |                         |    |    |   |   |   |   |
| FN1764  | 0.187                  | 23.848               | 2.596e-1 | 7.817e-1 | 926  | 3002 | 1268.7495  | 3646.5481 | AAL93877.1  Enolase                                              |                         |    |    |   |   |   |   |
|         |                        |                      |          |          | 7022 | 2773 | 7022.0000  | 3637.6360 |                                                                  |                         |    |    |   |   |   |   |
| FN1765  | -1.291                 | 19.164               | 6.487e-3 | 6.485e-3 | 207  | 933  | 283.6189   | 1133.3209 | AAL93878.1  Pyruvate kinase                                      |                         |    |    |   |   |   |   |
|         |                        |                      |          |          | 696  | 964  | 696.0000   | 1264.5803 |                                                                  |                         |    |    |   |   |   |   |
| FN1780  | -1.339                 | 8.610                | 5.36e-3  | 4.992e-3 | 5    | 28   | 6.8507     | 34.0118   | AAL93879.1  Hypothetical protein                                 |                         |    |    |   |   |   |   |
|         |                        |                      |          |          | 18   | 22   | 18.0000    | 28.8597   |                                                                  |                         |    |    |   |   |   |   |
| FN1781  | -0.691                 | 18.542               | 1.231e-2 | 1.454e-2 | 433  | 666  | 593.2706   | 808.9943  | AAL93880.1  LytB protein                                         |                         |    |    |   |   |   |   |
|         |                        |                      |          |          | 379  | 580  | 379.0000   | 760.8471  |                                                                  |                         |    |    |   |   |   |   |
| FN1783  |                        |                      |          |          |      |      |            |           | AAL93882.1  Ethanolamine utilization protein eutJ                |                         |    |    |   |   |   |   |
|         |                        |                      |          |          | 11   |      | 11.0000    |           |                                                                  |                         |    |    |   |   |   |   |
| FN1784  | -1.541                 | 8.185                |          |          |      | 22   |            | 26.7235   | AAL93883.1  unknown                                              |                         |    |    |   |   |   |   |
|         |                        |                      |          |          | 10   | 24   | 10.0000    | 31.4833   |                                                                  |                         |    |    |   |   |   |   |
| FN1785  | -1.171                 | 8.572                |          |          |      | 32   |            | 38.8706   | AAL93884.1  Hypothetical protein                                 |                         |    |    |   |   |   |   |
|         |                        |                      |          |          | 13   | 15   | 13.0000    | 19.6771   |                                                                  |                         |    |    |   |   |   |   |
| FN1786  | -1.607                 | 10.856               | 5.276e-3 | 4.89e-3  | 9    | 60   | 12.3313    | 72.8824   | AAL93885.1  ADP-heptose synthase                                 |                         |    |    |   |   |   |   |
|         |                        |                      |          |          | 37   | 59   | 37.0000    | 77.3965   |                                                                  |                         |    |    |   |   |   |   |
| FN1787  | -2.139                 | 10.221               | 8.616e-4 | 3.704e-4 | 16   | 60   | 21.9222    | 72.8824   | AAL93886.1  Tetratricopeptide repeat family protein              |                         |    |    |   |   |   |   |
|         |                        |                      |          |          | 11   | 55   | 11.0000    | 72.1493   |                                                                  |                         |    |    |   |   |   |   |
| FN1788  | 0.089                  | 9.167                | 2.6e-1   | 7.834e-1 | 12   | 21   | 16.4417    | 25.5088   | AAL93887.1  2C-methyl-D-erythritol 2,4-cyclodiphosphate synthase |                         |    |    |   |   |   |   |
|         |                        |                      |          |          | 33   | 16   | 33.0000    | 20.9889   |                                                                  |                         |    |    |   |   |   |   |
| FN1790  | 3.150                  | 7.103                |          |          | 5    |      | 6.8507     |           | AAL93889.1  Cob(I)alamin adenosyltransferase                     |                         |    |    |   |   |   |   |
|         |                        |                      |          |          | 63   | 3    | 63.0000    | 3.9354    |                                                                  |                         |    |    |   |   |   |   |
| FN1792  | 0.744                  | 22.973               | 7.001e-2 | 1.427e-1 | 3669 | 1765 | 5027.0431  | 2143.9565 | AAL93891.1  Hypothetical protein                                 |                         |    |    |   |   |   |   |
|         |                        |                      |          |          | 2401 | 1746 | 2401.0000  | 2290.4120 |                                                                  |                         |    |    |   |   |   |   |

- Show detected proteins only
- Show all proteins

Filter by category:  
GO: amino acid transport

Proteins found:  
1338

Enter (or paste) list of ORFs

Find ORFs

Test

Cutoff

q-Value

p-Value

.005

| Signif | Direction | Applies To   |
|--------|-----------|--------------|
| yes    | +         | ratios, bars |
| no     | n/a       | bars         |
| yes    | -         | ratios, bars |
| yes    | +         | p-, q-Values |
| yes    | -         | p-, q-Values |

Dot Plots Dot Plots

Fn Summary Table

FnPg vs Fn

FnSg vs Fn

FnPgSg vs Fn

FnPgSg vs FnPg

FnSg vs FnPg

FnPgSg vs FnSg

Fn Coverage

| Protein       | FnPg vs Fn             |                      |          |          | Raw      |     | Normalized |          | Description                                                              | Log <sub>2</sub> Ratios |                                                            |    |   |   |   |   |
|---------------|------------------------|----------------------|----------|----------|----------|-----|------------|----------|--------------------------------------------------------------------------|-------------------------|------------------------------------------------------------|----|---|---|---|---|
|               | Log <sub>2</sub> Ratio | Log <sub>2</sub> Sum | q-Value  | p-Value  | FnPg     | Fn  | FnPg       | Fn       |                                                                          | -6                      | -4                                                         | -2 | 0 | 2 | 4 | 6 |
|               | <b>FN1793</b>          | 0.340                | 14.830   | 2.264e-1 | 6.524e-1 | 38  | 131        | 52.0653  |                                                                          | 159.1265                | AAL93892.1  Phosphoenolpyruvate-protein phosphotransferase |    |   |   |   |   |
|               |                        |                      |          |          | 332      | 110 | 332.0000   | 144.2986 |                                                                          |                         |                                                            |    |   |   |   |   |
| <b>FN1794</b> | -2.237                 | 12.907               | 4.652e-4 | 1.373e-4 | 29       | 148 | 39.7341    | 179.7765 | AAL93893.1  Phosphocarrier protein HPr                                   |                         |                                                            |    |   |   |   |   |
|               |                        |                      |          |          | 41       | 153 | 41.0000    | 200.7062 |                                                                          |                         |                                                            |    |   |   |   |   |
| <b>FN1796</b> |                        |                      |          |          |          |     |            |          | AAL93895.1  unknown                                                      |                         |                                                            |    |   |   |   |   |
|               |                        |                      |          |          |          | 5   |            | 6.5590   |                                                                          |                         |                                                            |    |   |   |   |   |
| <b>FN1797</b> | -0.965                 | 12.188               | 1.807e-2 | 2.372e-2 | 21       | 74  | 28.7729    | 89.8883  | AAL93896.1  Spermidine/putrescine transport ATP-binding protein potA     |                         |                                                            |    |   |   |   |   |
|               |                        |                      |          |          | 69       | 77  | 69.0000    | 101.0090 |                                                                          |                         |                                                            |    |   |   |   |   |
| <b>FN1798</b> | -0.529                 | 7.173                |          |          |          |     |            |          | AAL93897.1  Spermidine/putrescine transport system permease protein potB |                         |                                                            |    |   |   |   |   |
|               |                        |                      |          |          | 10       | 11  | 10.0000    | 14.4299  |                                                                          |                         |                                                            |    |   |   |   |   |
| <b>FN1800</b> | -1.164                 | 14.275               | 1.624e-3 | 9.55e-4  | 57       | 172 | 78.0980    | 208.9295 | AAL93899.1  Peptidyl-prolyl cis-trans isomerase                          |                         |                                                            |    |   |   |   |   |
|               |                        |                      |          |          | 110      | 162 | 110.0000   | 212.5125 |                                                                          |                         |                                                            |    |   |   |   |   |
| <b>FN1801</b> | 1.297                  | 8.419                |          |          |          |     |            |          | AAL93900.1  Sodium/glutamate symport carrier protein                     |                         |                                                            |    |   |   |   |   |
|               |                        |                      |          |          | 29       | 9   | 29.0000    | 11.8062  |                                                                          |                         |                                                            |    |   |   |   |   |
| <b>FN1803</b> |                        |                      |          |          |          |     |            |          | AAL93902.1  Transcriptional regulator, TetR family                       |                         |                                                            |    |   |   |   |   |
|               |                        |                      |          |          |          | 7   |            | 8.5029   |                                                                          |                         |                                                            |    |   |   |   |   |
| <b>FN1804</b> | 0.733                  | 8.186                |          |          |          |     |            |          | AAL93903.1  Aminoacyl-histidine dipeptidase                              |                         |                                                            |    |   |   |   |   |
|               |                        |                      |          |          | 22       | 10  | 22.0000    | 13.1181  |                                                                          |                         |                                                            |    |   |   |   |   |
| <b>FN1807</b> | -0.405                 | 17.120               | 4.755e-4 | 1.426e-4 | 251      | 348 | 343.9051   | 422.7178 | AAL93906.1  Hypothetical protein                                         |                         |                                                            |    |   |   |   |   |
|               |                        |                      |          |          | 312      | 340 | 312.0000   | 446.0138 |                                                                          |                         |                                                            |    |   |   |   |   |
| <b>FN1808</b> | -3.354                 | 10.524               |          |          |          |     |            |          | AAL93907.1  Hypothetical protein                                         |                         |                                                            |    |   |   |   |   |
|               |                        |                      |          |          | 12       | 101 | 12.0000    | 132.4923 |                                                                          |                         |                                                            |    |   |   |   |   |
| <b>FN1809</b> | 0.046                  | 8.944                | 2.993e-1 | 9.525e-1 | 3        | 23  | 4.1104     | 27.9382  | AAL93908.1  Iron/zinc/copper-binding protein                             |                         |                                                            |    |   |   |   |   |
|               |                        |                      |          |          | 41       | 12  | 41.0000    | 15.7417  |                                                                          |                         |                                                            |    |   |   |   |   |
| <b>FN1811</b> | -1.950                 | 10.824               | 6.988e-4 | 2.593e-4 | 9        | 73  | 12.3313    | 88.6736  | AAL93910.1  Manganese transport system ATP-binding protein mntA          |                         |                                                            |    |   |   |   |   |
|               |                        |                      |          |          | 31       | 60  | 31.0000    | 78.7083  |                                                                          |                         |                                                            |    |   |   |   |   |
| <b>FN1812</b> | -0.764                 | 14.623               | 7.852e-2 | 1.657e-1 | 148      | 167 | 202.7807   | 202.8559 | AAL93911.1  Manganese-binding protein                                    |                         |                                                            |    |   |   |   |   |
|               |                        |                      |          |          | 41       | 161 | 41.0000    | 211.2006 |                                                                          |                         |                                                            |    |   |   |   |   |
| <b>FN1813</b> | -2.125                 | 8.768                |          |          |          |     |            |          | AAL93912.1  Manganese-binding protein                                    |                         |                                                            |    |   |   |   |   |
|               |                        |                      |          |          | 10       | 35  | 10.0000    | 45.9132  |                                                                          |                         |                                                            |    |   |   |   |   |
| <b>FN1814</b> |                        |                      |          |          |          |     |            |          | AAL93913.1  Hypothetical protein                                         |                         |                                                            |    |   |   |   |   |
|               |                        |                      |          |          |          | 29  |            | 35.2265  |                                                                          |                         |                                                            |    |   |   |   |   |
|               |                        |                      |          |          |          | 27  |            | 35.4187  |                                                                          |                         |                                                            |    |   |   |   |   |

Show detected proteins only

Show all proteins

Filter by category:

GO: amino acid transport

Proteins found: 1338

Enter (or paste) list of ORFs

Find ORFs

Test Cutoff

q-Value .005

p-Value

| Signif      | Direction | Applies To |
|-------------|-----------|------------|
| red         | yes       | +          |
| yellow      | no        | n/a        |
| green       | yes       | -          |
| pink        | yes       | +          |
| light green | yes       | -          |

p-, q-Values

Dot Plots Dot Plots



Fn Summary Table FnPg vs Fn FnSg vs Fn FnPgSg vs Fn FnPgSg vs FnPg FnSg vs FnPg FnPgSg vs FnSg Fn Coverage

| Protein | FnPg vs Fn             |                      |          |          | Raw  |     | Normalized |          | Description                                                 | Log <sub>2</sub> Ratios |    |    |   |   |   |   |
|---------|------------------------|----------------------|----------|----------|------|-----|------------|----------|-------------------------------------------------------------|-------------------------|----|----|---|---|---|---|
|         | Log <sub>2</sub> Ratio | Log <sub>2</sub> Sum | q-Value  | p-Value  | FnPg | Fn  | FnPg       | Fn       |                                                             | -6                      | -4 | -2 | 0 | 2 | 4 | 6 |
| FN1816  | 0.093                  | 6.397                | 2.275e-1 | 6.566e-1 | 8    | 6   | 10.9611    | 7.2882   | AAL93915.1  unknown                                         |                         |    |    |   |   |   |   |
|         |                        |                      |          |          | 8    | 8   | 8.0000     | 10.4944  |                                                             |                         |    |    |   |   |   |   |
| FN1817  | -0.378                 | 5.575                |          |          | 3    |     | 4.1104     |          | AAL93916.1  Hemolysin                                       |                         |    |    |   |   |   |   |
|         |                        |                      |          |          | 8    | 6   | 8.0000     | 7.8708   |                                                             |                         |    |    |   |   |   |   |
| FN1819  |                        |                      |          |          |      | 8   |            | 9.7176   | AAL93918.1  Export ABC transporter                          |                         |    |    |   |   |   |   |
|         |                        |                      |          |          |      | 12  |            | 15.7417  |                                                             |                         |    |    |   |   |   |   |
| FN1820  |                        |                      |          |          |      | 8   |            | 9.7176   | AAL93919.1  Export ABC transporter                          |                         |    |    |   |   |   |   |
|         |                        |                      |          |          |      | 6   |            | 7.8708   |                                                             |                         |    |    |   |   |   |   |
| FN1822  |                        |                      |          |          |      | 16  |            | 19.4353  | AAL93921.1  Flavodoxin                                      |                         |    |    |   |   |   |   |
|         |                        |                      |          |          |      | 10  |            | 13.1181  |                                                             |                         |    |    |   |   |   |   |
| FN1826  | -1.242                 | 11.001               | 8.325e-4 | 3.482e-4 | 24   | 52  | 32.8834    | 63.1647  | AAL93925.1  Protease                                        |                         |    |    |   |   |   |   |
|         |                        |                      |          |          | 26   | 58  | 26.0000    | 76.0847  |                                                             |                         |    |    |   |   |   |   |
| FN1827  | -0.457                 | 11.493               | 5.739e-2 | 1.087e-1 | 26   | 42  | 35.6236    | 51.0177  | AAL93926.1  Replicative DNA helicase                        |                         |    |    |   |   |   |   |
|         |                        |                      |          |          | 56   | 57  | 56.0000    | 74.7729  |                                                             |                         |    |    |   |   |   |   |
| FN1828  | -0.343                 | 13.069               | 1.914e-1 | 5.278e-1 | 99   | 79  | 135.6438   | 95.9618  | AAL93927.1  LSU ribosomal protein L9P                       |                         |    |    |   |   |   |   |
|         |                        |                      |          |          | 29   | 86  | 29.0000    | 112.8153 |                                                             |                         |    |    |   |   |   |   |
| FN1830  | 0.319                  | 10.276               | 1.633e-1 | 4.251e-1 | 18   | 26  | 24.6625    | 31.5824  | AAL93929.1  DNA polymerase III subunits gamma and tau       |                         |    |    |   |   |   |   |
|         |                        |                      |          |          | 54   | 24  | 54.0000    | 31.4833  |                                                             |                         |    |    |   |   |   |   |
| FN1831  | 0.505                  | 12.687               | 8.971e-3 | 9.957e-3 | 77   | 55  | 105.5008   | 66.8088  | AAL93930.1  Nitrogen assimilation regulatory protein        |                         |    |    |   |   |   |   |
|         |                        |                      |          |          | 88   | 53  | 88.0000    | 69.5257  |                                                             |                         |    |    |   |   |   |   |
| FN1834  | -1.228                 | 10.793               | 3.924e-4 | 1.042e-4 | 19   | 50  | 26.0327    | 60.7353  | AAL93933.1  Biopolymer transport exbB protein               |                         |    |    |   |   |   |   |
|         |                        |                      |          |          | 29   | 52  | 29.0000    | 68.2139  |                                                             |                         |    |    |   |   |   |   |
| FN1836  | -1.370                 | 12.374               | 6.756e-4 | 2.451e-4 | 26   | 100 | 35.6236    | 121.4706 | AAL93935.1  Tetratricopeptide repeat family protein         |                         |    |    |   |   |   |   |
|         |                        |                      |          |          | 55   | 86  | 55.0000    | 112.8153 |                                                             |                         |    |    |   |   |   |   |
| FN1839  | 1.968                  | 16.740               | 3.183e-2 | 4.881e-2 | 286  | 135 | 391.8600   | 163.9853 | AAL93938.1  Glycerol kinase                                 |                         |    |    |   |   |   |   |
|         |                        |                      |          |          | 917  | 130 | 917.0000   | 170.5347 |                                                             |                         |    |    |   |   |   |   |
| FN1840  | 1.484                  | 11.328               | 4.759e-3 | 4.259e-3 | 53   | 24  | 72.6174    | 29.1529  | AAL93939.1  Dihydroxyacetone kinase                         |                         |    |    |   |   |   |   |
|         |                        |                      |          |          | 97   | 24  | 97.0000    | 31.4833  |                                                             |                         |    |    |   |   |   |   |
| FN1841  | -0.413                 | 8.863                | 1.55e-1  | 3.963e-1 | 20   | 14  | 27.4028    | 17.0059  | AAL93940.1  Dihydroxyacetone kinase                         |                         |    |    |   |   |   |   |
|         |                        |                      |          |          | 10   | 25  | 10.0000    | 32.7951  |                                                             |                         |    |    |   |   |   |   |
| FN1842  | -0.169                 | 9.365                | 2.024e-1 | 5.658e-1 | 12   | 20  | 16.4417    | 24.2941  | AAL93941.1  Dihydroxyacetone kinase phosphotransfer protein |                         |    |    |   |   |   |   |
|         |                        |                      |          |          | 32   | 23  | 32.0000    | 30.1715  |                                                             |                         |    |    |   |   |   |   |

Show detected proteins only  
 Show all proteins  
 Filter by category:

Proteins found: 1338

Test Cutoff

| Signif | Direction | Applies To   |
|--------|-----------|--------------|
| yes    | +         | ratios, bars |
| no     | n/a       | bars         |
| yes    | -         | ratios, bars |
| yes    | +         | p-, q-Values |
| yes    | -         |              |

Fn Summary Table FnPg vs Fn FnSg vs Fn FnPgSg vs Fn FnPgSg vs FnPg FnSg vs FnPg FnPgSg vs FnSg Fn Coverage

| Protein | FnPg vs Fn             |                      |          |          | Raw  |      | Normalized |           | Description                                                       | Log <sub>2</sub> Ratios |    |    |   |   |   |   |
|---------|------------------------|----------------------|----------|----------|------|------|------------|-----------|-------------------------------------------------------------------|-------------------------|----|----|---|---|---|---|
|         | Log <sub>2</sub> Ratio | Log <sub>2</sub> Sum | q-Value  | p-Value  | FnPg | Fn   | FnPg       | Fn        |                                                                   | -6                      | -4 | -2 | 0 | 2 | 4 | 6 |
| FN1843  |                        |                      |          |          | 3    |      | 4.1104     |           | AAL93942.1  Surface antigen                                       |                         |    |    |   |   |   |   |
| FN1844  | -1.392                 | 6.035                |          |          | 5    | 10   | 5.0000     | 13.1181   | AAL93943.1  Ketoacyl reductase hetN                               |                         |    |    |   |   |   |   |
| FN1847  | 0.729                  | 7.165                | 1.321e-1 | 3.225e-1 | 5    | 11   | 6.8507     | 13.3618   | AAL93946.1  DTD-4-dehydrorhamnose 3,5-epimerase                   |                         |    |    |   |   |   |   |
| FN1849  | -0.266                 | 9.436                |          |          |      | 27   |            | 32.7971   | AAL93948.1  Coenzyme F390 synthetase                              |                         |    |    |   |   |   |   |
| FN1850  | 2.654                  | 8.516                |          |          |      | 5    |            | 6.0735    | AAL93949.1  3-oxoacyl-[acyl-carrier-protein] synthase III         |                         |    |    |   |   |   |   |
| FN1851  | 0.490                  | 12.612               | 1.857e-1 | 5.072e-1 | 23   | 57   | 31.5132    | 69.2383   | AAL93950.1  Ribonuclease PH                                       |                         |    |    |   |   |   |   |
| FN1852  | -0.404                 | 10.445               | 8.45e-2  | 1.828e-1 | 16   | 34   | 21.9222    | 41.3000   | AAL93951.1  unknown                                               |                         |    |    |   |   |   |   |
| FN1853  | 0.477                  | 8.050                | 1.379e-1 | 3.407e-1 | 20   | 13   | 27.4028    | 15.7912   | AAL93952.1  Methylaspartate mutase                                |                         |    |    |   |   |   |   |
| FN1854  | -0.562                 | 11.028               | 1.92e-2  | 2.572e-2 | 33   | 45   | 45.2146    | 54.6618   | AAL93953.1  Methylaspartate mutase                                |                         |    |    |   |   |   |   |
| FN1855  |                        |                      |          |          |      |      |            |           | AAL93954.1  Methylaspartate mutase                                |                         |    |    |   |   |   |   |
| FN1856  | -0.155                 | 23.372               | 4.956e-2 | 8.848e-2 | 2099 | 2855 | 2875.9235  | 3467.9863 | AAL93955.1  Butyrate-acetoacetate CoA-transferase subunit B       |                         |    |    |   |   |   |   |
| FN1857  | 0.801                  | 19.791               | 1.135e-4 | 1.655e-5 | 897  | 633  | 1229.0154  | 768.9090  | AAL93956.1  Acetoacetate: butyrate/acetate coenzyme A transferase |                         |    |    |   |   |   |   |
| FN1858  | -0.870                 | 11.593               |          |          | 30   | 60   | 41.1042    | 72.8824   | AAL93957.1  Short-chain fatty acids transporter                   |                         |    |    |   |   |   |   |
| FN1859  | -0.003                 | 24.501               | 3.09e-1  | 9.971e-1 | 443  | 4473 | 606.9720   | 5433.3809 | AAL93958.1  Major outer membrane protein                          |                         |    |    |   |   |   |   |
| FN1860  | 1.392                  | 10.825               |          |          |      | 26   |            | 31.5824   | AAL93959.1  NA+/H+ antiporter NHAC                                |                         |    |    |   |   |   |   |
| FN1862  | -0.052                 | 15.804               | 2.805e-1 | 8.691e-1 | 232  | 211  | 317.8724   | 256.3030  | AAL93961.1  L-beta-lysine 5,6-aminomutase beta subunit            |                         |    |    |   |   |   |   |

Show detected proteins only  
 Show all proteins  
 Filter by category:

Proteins found: 1338

Test Cutoff

| Signif | Direction | Applies To   |
|--------|-----------|--------------|
| yes    | +         | ratios, bars |
| no     | n/a       | bars         |
| yes    | -         | ratios, bars |
| yes    | +         | p-, q-Values |
| yes    | -         |              |

Fn Summary Table

FnPg vs Fn

FnSg vs Fn

FnPgSg vs Fn

FnPgSg vs FnPg

FnSg vs FnPg

FnPgSg vs FnSg

Fn Coverage

| Protein | FnPg vs Fn             |                      |          |          | Raw  |      | Normalized |           | Description                                                                | Log <sub>2</sub> Ratios |    |    |   |   |   |   |
|---------|------------------------|----------------------|----------|----------|------|------|------------|-----------|----------------------------------------------------------------------------|-------------------------|----|----|---|---|---|---|
|         | Log <sub>2</sub> Ratio | Log <sub>2</sub> Sum | q-Value  | p-Value  | FnPg | Fn   | FnPg       | Fn        |                                                                            | -6                      | -4 | -2 | 0 | 2 | 4 | 6 |
| FN1863  | 1.287                  | 17.930               | 1.008e-1 | 2.297e-1 | 957  | 246  | 1311.2238  | 298.8177  | AAL93962.1  L-beta-lysine 5,6-aminomutase alpha subunit                    |                         |    |    |   |   |   |   |
|         |                        |                      |          |          | 250  | 260  | 250.0000   | 341.0694  |                                                                            |                         |    |    |   |   |   |   |
| FN1864  | -0.800                 | 8.341                | 8.261e-2 | 1.774e-1 | 17   | 24   | 23.2924    | 29.1529   | AAL93963.1  DNA mismatch repair protein mutS                               |                         |    |    |   |   |   |   |
|         |                        |                      |          |          | 4    | 14   | 4.0000     | 18.3653   |                                                                            |                         |    |    |   |   |   |   |
| FN1865  |                        |                      |          |          |      | 4    |            | 4.8588    | AAL93964.1  Hypothetical protein                                           |                         |    |    |   |   |   |   |
|         |                        |                      |          |          |      |      |            |           |                                                                            |                         |    |    |   |   |   |   |
| FN1866  | -0.479                 | 20.901               | 5.418e-2 | 1.001e-1 | 1117 | 1326 | 1530.4462  | 1610.7004 | AAL93965.1  Lysine 2,3-aminomutase                                         |                         |    |    |   |   |   |   |
|         |                        |                      |          |          | 840  | 1291 | 840.0000   | 1693.5406 |                                                                            |                         |    |    |   |   |   |   |
| FN1867  | 0.241                  | 19.771               | 2.013e-1 | 5.62e-1  | 1058 | 736  | 1449.6080  | 894.0238  | AAL93966.1  Zn-dependent alcohol dehydrogenases and related dehydrogenases |                         |    |    |   |   |   |   |
|         |                        |                      |          |          | 607  | 645  | 607.0000   | 846.1144  |                                                                            |                         |    |    |   |   |   |   |
| FN1868  | -0.951                 | 14.428               | 3.495e-3 | 2.773e-3 | 96   | 179  | 131.5334   | 217.4324  | AAL93967.1  Hypothetical cytosolic protein                                 |                         |    |    |   |   |   |   |
|         |                        |                      |          |          | 82   | 149  | 82.0000    | 195.4590  |                                                                            |                         |    |    |   |   |   |   |
| FN1869  | -0.432                 | 15.372               | 7.765e-2 | 1.633e-1 | 172  | 180  | 235.6641   | 218.6471  | AAL93968.1  Hypothetical protein                                           |                         |    |    |   |   |   |   |
|         |                        |                      |          |          | 119  | 198  | 119.0000   | 259.7374  |                                                                            |                         |    |    |   |   |   |   |
| FN1870  |                        |                      |          |          |      |      |            |           | AAL93969.1  unknown                                                        |                         |    |    |   |   |   |   |
|         |                        |                      |          |          |      | 6    |            | 7.8708    |                                                                            |                         |    |    |   |   |   |   |
| FN1871  |                        |                      |          |          |      | 9    |            | 10.9324   | AAL93970.1  unknown                                                        |                         |    |    |   |   |   |   |
|         |                        |                      |          |          |      | 9    |            | 11.8062   |                                                                            |                         |    |    |   |   |   |   |
| FN1872  |                        |                      |          |          |      | 17   |            | 20.6500   | AAL93971.1  unknown                                                        |                         |    |    |   |   |   |   |
|         |                        |                      |          |          |      | 19   |            | 24.9243   |                                                                            |                         |    |    |   |   |   |   |
| FN1873  | -1.080                 | 11.153               | 5.665e-4 | 1.858e-4 | 26   | 57   | 35.6236    | 69.2383   | AAL93972.1  Bis(5'-nucleosyl)-tetraphosphatase                             |                         |    |    |   |   |   |   |
|         |                        |                      |          |          | 30   | 53   | 30.0000    | 69.5257   |                                                                            |                         |    |    |   |   |   |   |
| FN1874  | -1.394                 | 10.062               | 5.462e-3 | 5.12e-3  | 9    | 43   | 12.3313    | 52.2324   | AAL93973.1  Ribose 5-phosphate isomerase                                   |                         |    |    |   |   |   |   |
|         |                        |                      |          |          | 28   | 41   | 28.0000    | 53.7840   |                                                                            |                         |    |    |   |   |   |   |
| FN1875  | 0.043                  | 14.147               | 2.717e-1 | 8.319e-1 | 112  | 131  | 153.4557   | 159.1265  | AAL93974.1  Peptidyl-prolyl cis-trans isomerase                            |                         |    |    |   |   |   |   |
|         |                        |                      |          |          | 120  | 81   | 120.0000   | 106.2562  |                                                                            |                         |    |    |   |   |   |   |
| FN1878  |                        |                      |          |          |      | 11   |            | 13.3618   | AAL93977.1  unknown                                                        |                         |    |    |   |   |   |   |
|         |                        |                      |          |          |      | 9    |            | 11.8062   |                                                                            |                         |    |    |   |   |   |   |
| FN1879  |                        |                      |          |          |      |      |            |           | AAL93978.1  SSU ribosomal protein S20P                                     |                         |    |    |   |   |   |   |
|         |                        |                      |          |          |      | 33   |            | 43.2896   |                                                                            |                         |    |    |   |   |   |   |
| FN1880  | 1.807                  | 12.789               | 2.521e-6 | 1.122e-7 | 118  | 33   | 161.6765   | 40.0853   | AAL93979.1  Oxygen-insensitive NAD(P)H nitroreductase                      |                         |    |    |   |   |   |   |
|         |                        |                      |          |          | 153  | 38   | 153.0000   | 49.8486   |                                                                            |                         |    |    |   |   |   |   |

- Show detected proteins only
- Show all proteins

Filter by category:  
GO: amino acid transport

Proteins found:  
1338

Enter (or paste) list of ORFs

Find ORFs

Test

Cutoff

q-Value

p-Value

.005

| Signif | Direction | Applies To   |
|--------|-----------|--------------|
| yes    | +         | ratios, bars |
| no     | n/a       | bars         |
| yes    | -         | ratios, bars |
| yes    | +         | p-, q-Values |
| yes    | -         |              |

Dot Plots Dot Plots

Fn Summary Table FnPg vs Fn FnSg vs Fn FnPgSg vs Fn FnPgSg vs FnPg FnSg vs FnPg FnPgSg vs FnSg Fn Coverage

| Protein       | FnPg vs Fn             |                      |          |          | Raw  |      | Normalized |           | Description                                                                 | Log <sub>2</sub> Ratios |    |    |   |   |   |   |
|---------------|------------------------|----------------------|----------|----------|------|------|------------|-----------|-----------------------------------------------------------------------------|-------------------------|----|----|---|---|---|---|
|               | Log <sub>2</sub> Ratio | Log <sub>2</sub> Sum | q-Value  | p-Value  | FnPg | Fn   | FnPg       | Fn        |                                                                             | -6                      | -4 | -2 | 0 | 2 | 4 | 6 |
| <b>FN1881</b> |                        |                      |          |          | 10   |      | 10.0000    |           | AAL93980.1  Esterase                                                        |                         |    |    |   |   |   |   |
| <b>FN1884</b> | -0.444                 | 11.353               |          |          | 32   | 55   | 43.8445    | 66.8088   | AAL93983.1  unknown                                                         |                         |    |    |   |   |   |   |
| <b>FN1890</b> | 2.010                  | 7.817                |          |          | 22   | 8    | 30.1431    | 9.7176    | AAL93989.1  Hypothetical protein                                            |                         |    |    |   |   |   |   |
| <b>FN1891</b> | 0.939                  | 8.361                | 1.275e-1 | 3.085e-1 | 6    | 14   | 8.2208     | 17.0059   | AAL93990.1  Glycerophosphoryl diester phosphodiesterase                     |                         |    |    |   |   |   |   |
| <b>FN1893</b> | -0.583                 | 18.694               | 1.202e-4 | 1.828e-5 | 389  | 648  | 532.9844   | 787.1296  | AAL93991.1  Fusobacterium outer membrane protein family                     |                         |    |    |   |   |   |   |
| <b>FN1898</b> | -1.157                 | 10.576               | 1.509e-2 | 1.872e-2 | 9    | 55   | 12.3313    | 66.8088   | AAL93997.1  Sugar transport ATP-binding protein                             |                         |    |    |   |   |   |   |
| <b>FN1899</b> | 0.060                  | 15.420               | 2.563e-1 | 7.682e-1 | 123  | 181  | 168.5272   | 219.8618  | AAL93998.1  Hypothetical lipoprotein                                        |                         |    |    |   |   |   |   |
| <b>FN1902</b> | -0.028                 | 10.100               | 2.452e-1 | 7.242e-1 | 26   | 27   | 35.6236    | 32.7971   | AAL94001.1  Deoxycytidylate deaminase                                       |                         |    |    |   |   |   |   |
| <b>FN1903</b> | -2.264                 | 9.805                | 3.089e-3 | 2.337e-3 | 17   | 55   | 23.2924    | 66.8088   | AAL94002.1  Coenzyme A disulfide reductase/ disulfide bond regulator domain |                         |    |    |   |   |   |   |
| <b>FN1905</b> |                        |                      |          |          |      |      |            |           | AAL94004.1  outer membrane protein                                          |                         |    |    |   |   |   |   |
| <b>FN1906</b> | 0.592                  | 17.159               | 8.944e-2 | 1.965e-1 | 222  | 257  | 304.1710   | 312.1795  | AAL94005.1  Cytosol aminopeptidase                                          |                         |    |    |   |   |   |   |
| <b>FN1908</b> | 0.384                  | 16.395               | 2.985e-2 | 4.49e-2  | 213  | 233  | 291.8398   | 283.0265  | AAL94007.1  Glycerophosphoryl diester phosphodiesterase                     |                         |    |    |   |   |   |   |
| <b>FN1909</b> | -0.951                 | 13.699               | 1.873e-3 | 1.17e-3  | 51   | 129  | 69.8771    | 156.6971  | AAL94008.1  UDP-3-O-[3-hydroxymyristoyl] glucosamine N-acyltransferase      |                         |    |    |   |   |   |   |
| <b>FN1910</b> | -1.075                 | 15.909               | 2.784e-3 | 2.019e-3 | 148  | 257  | 202.7807   | 312.1795  | AAL94009.1  periplasmic protein                                             |                         |    |    |   |   |   |   |
| <b>FN1911</b> | 0.539                  | 21.645               | 2.035e-2 | 2.771e-2 | 1822 | 1318 | 2496.3948  | 1600.9828 | AAL94010.1  Outer membrane protein                                          |                         |    |    |   |   |   |   |
| <b>FN1912</b> | -1.505                 | 8.335                | 6.81e-4  | 2.483e-4 | 9    | 25   | 12.3313    | 30.3677   | AAL94011.1  Hypothetical protein                                            |                         |    |    |   |   |   |   |

Show detected proteins only  
 Show all proteins  
 Filter by category:

Proteins found: 1338

Test Cutoff

| Signif | Direction | Applies To   |
|--------|-----------|--------------|
| yes    | +         | ratios, bars |
| no     | n/a       | bars         |
| yes    | -         | ratios, bars |
| yes    | +         | p-, q-Values |
| yes    | -         |              |

Fn Summary Table

FnPg vs Fn

FnSg vs Fn

FnPgSg vs Fn

FnPgSg vs FnPg

FnSg vs FnPg

FnPgSg vs FnSg

Fn Coverage

| Protein | FnPg vs Fn             |                      |          |          | Raw  |     | Normalized |          | Description                                                              | Log <sub>2</sub> Ratios |    |    |   |   |   |   |
|---------|------------------------|----------------------|----------|----------|------|-----|------------|----------|--------------------------------------------------------------------------|-------------------------|----|----|---|---|---|---|
|         | Log <sub>2</sub> Ratio | Log <sub>2</sub> Sum | q-Value  | p-Value  | FnPg | Fn  | FnPg       | Fn       |                                                                          | -6                      | -4 | -2 | 0 | 2 | 4 | 6 |
| FN1913  | -0.697                 | 12.644               | 4.043e-2 | 6.692e-2 | 64   | 77  | 87.6890    | 93.5324  | AAL94012.1  hydrolase (HD superfamily)                                   |                         |    |    |   |   |   |   |
|         |                        |                      |          |          | 38   | 84  | 38.0000    | 110.1916 |                                                                          |                         |    |    |   |   |   |   |
| FN1914  | 0.655                  | 13.979               | 1.845e-1 | 5.025e-1 | 213  | 76  | 291.8398   | 92.3177  | AAL94013.1  Anti-sigma F factor antagonist                               |                         |    |    |   |   |   |   |
|         |                        |                      |          |          | 27   | 84  | 27.0000    | 110.1916 |                                                                          |                         |    |    |   |   |   |   |
| FN1917  | 0.608                  | 4.561                |          |          |      |     |            |          | AAL94016.1  tRNA delta(2)-isopentenylpyrophosphate transferase           |                         |    |    |   |   |   |   |
|         |                        |                      |          |          | 6    | 3   | 6.0000     | 3.9354   |                                                                          |                         |    |    |   |   |   |   |
| FN1918  | -0.558                 | 11.698               | 7.937e-2 | 1.682e-1 | 19   | 59  | 26.0327    | 71.6677  | AAL94017.1  SPO0B-associated GTP-binding protein                         |                         |    |    |   |   |   |   |
|         |                        |                      |          |          | 69   | 52  | 69.0000    | 68.2139  |                                                                          |                         |    |    |   |   |   |   |
| FN1919  | -2.878                 | 8.684                | 3.404e-5 | 2.617e-6 | 8    | 43  | 10.9611    | 52.2324  | AAL94018.1  Methyltransferase                                            |                         |    |    |   |   |   |   |
|         |                        |                      |          |          | 4    | 44  | 4.0000     | 57.7194  |                                                                          |                         |    |    |   |   |   |   |
| FN1920  |                        |                      |          |          | 7    |     | 9.5910     |          | AAL94019.1  tRNA (5-methylaminomethyl-2-thiouridylate)-methyltransferase |                         |    |    |   |   |   |   |
|         |                        |                      |          |          |      |     |            |          |                                                                          |                         |    |    |   |   |   |   |
| FN1922  | 0.598                  | 7.441                | 2.103e-6 | 7.977e-8 | 12   | 9   | 16.4417    | 10.9324  | AAL94021.1  Hypothetical protein                                         |                         |    |    |   |   |   |   |
|         |                        |                      |          |          | 16   | 8   | 16.0000    | 10.4944  |                                                                          |                         |    |    |   |   |   |   |
| FN1923  |                        |                      |          |          |      | 4   |            | 4.8588   | AAL94022.1  Adenine-specific methyltransferase                           |                         |    |    |   |   |   |   |
|         |                        |                      |          |          |      |     |            |          |                                                                          |                         |    |    |   |   |   |   |
| FN1925  |                        |                      |          |          | 6    |     | 6.0000     |          | AAL94024.1  Arsenical pump membrane protein                              |                         |    |    |   |   |   |   |
|         |                        |                      |          |          |      |     |            |          |                                                                          |                         |    |    |   |   |   |   |
| FN1926  | 0.597                  | 12.116               | 1.235e-1 | 2.962e-1 | 32   | 46  | 43.8445    | 55.8765  | AAL94025.1  Nitrogen regulatory IIA protein                              |                         |    |    |   |   |   |   |
|         |                        |                      |          |          | 120  | 40  | 120.0000   | 52.4722  |                                                                          |                         |    |    |   |   |   |   |
| FN1927  | 0.658                  | 14.381               | 9.963e-2 | 2.262e-1 | 78   | 104 | 106.8709   | 126.3294 | AAL94026.1  DEGV protein                                                 |                         |    |    |   |   |   |   |
|         |                        |                      |          |          | 260  | 81  | 260.0000   | 106.2562 |                                                                          |                         |    |    |   |   |   |   |
| FN1928  | 1.094                  | 8.521                |          |          |      |     |            |          | AAL94027.1  Transcriptional regulator, MerR family                       |                         |    |    |   |   |   |   |
|         |                        |                      |          |          | 28   | 10  | 28.0000    | 13.1181  |                                                                          |                         |    |    |   |   |   |   |
| FN1929  | -0.664                 | 11.498               | 1.087e-1 | 2.519e-1 | 12   | 38  | 16.4417    | 46.1588  | AAL94028.1  Competence-damage protein cinA                               |                         |    |    |   |   |   |   |
|         |                        |                      |          |          | 69   | 68  | 69.0000    | 89.2028  |                                                                          |                         |    |    |   |   |   |   |
| FN1931  | 0.294                  | 5.321                |          |          |      | 4   |            | 4.8588   | AAL94030.1  Protease                                                     |                         |    |    |   |   |   |   |
|         |                        |                      |          |          | 7    | 5   | 7.0000     | 6.5590   |                                                                          |                         |    |    |   |   |   |   |
| FN1933  | -1.191                 | 6.775                | 1.782e-3 | 1.088e-3 | 5    | 12  | 6.8507     | 14.5765  | AAL94032.1  Hypothetical protein                                         |                         |    |    |   |   |   |   |
|         |                        |                      |          |          | 7    | 13  | 7.0000     | 17.0535  |                                                                          |                         |    |    |   |   |   |   |
| FN1935  | -0.856                 | 6.026                |          |          |      | 6   |            | 7.2882   | AAL94034.1  Adenine-specific methyltransferase                           |                         |    |    |   |   |   |   |
|         |                        |                      |          |          | 6    | 11  | 6.0000     | 14.4299  |                                                                          |                         |    |    |   |   |   |   |

Show detected proteins only  
 Show all proteins  
 Filter by category:

Proteins found: 1338

Enter (or paste) list of ORFs

Find ORFs

Test Cutoff

q-Value .005

p-Value

| Signif | Direction | Applies To   |
|--------|-----------|--------------|
| yes    | +         | ratios, bars |
| no     | n/a       | bars         |
| yes    | -         | ratios, bars |
| yes    | +         | p-, q-Values |
| yes    | -         |              |

Dot Plots Dot Plots

Fn Summary Table FnPg vs Fn FnSg vs Fn FnPgSg vs Fn FnPgSg vs FnPg FnSg vs FnPg FnPgSg vs FnSg Fn Coverage

| Protein | FnPg vs Fn             |                      |          |          | Raw  |     | Normalized |           | Description                                                            | Log <sub>2</sub> Ratios |    |    |   |   |   |   |
|---------|------------------------|----------------------|----------|----------|------|-----|------------|-----------|------------------------------------------------------------------------|-------------------------|----|----|---|---|---|---|
|         | Log <sub>2</sub> Ratio | Log <sub>2</sub> Sum | q-Value  | p-Value  | FnPg | Fn  | FnPg       | Fn        |                                                                        | -6                      | -4 | -2 | 0 | 2 | 4 | 6 |
| FN1939  | 0.385                  | 8.111                |          |          |      | 11  |            | 13.3618   | AAL94038.1  Hypothetical protein                                       |                         |    |    |   |   |   |   |
|         |                        |                      |          |          | 19   | 12  | 19.0000    | 15.7417   |                                                                        |                         |    |    |   |   |   |   |
| FN1941  | 1.481                  | 15.151               | 1.812e-4 | 3.292e-5 | 239  | 94  | 327.4634   | 114.1824  | AAL94040.1  ClpB protein                                               |                         |    |    |   |   |   |   |
|         |                        |                      |          |          | 310  | 87  | 310.0000   | 114.1271  |                                                                        |                         |    |    |   |   |   |   |
| FN1942  | 1.174                  | 5.735                |          |          | 8    | 4   | 10.9611    | 4.8588    | AAL94041.1  putative DNA-binding protein                               |                         |    |    |   |   |   |   |
|         |                        |                      |          |          |      |     |            |           |                                                                        |                         |    |    |   |   |   |   |
| FN1943  | 2.132                  | 22.304               | 3.643e-3 | 2.929e-3 | 4000 | 929 | 5480.5594  | 1128.4621 | AAL94042.1  Tryptophanase                                              |                         |    |    |   |   |   |   |
|         |                        |                      |          |          | 4049 | 797 | 4049.0000  | 1045.5088 |                                                                        |                         |    |    |   |   |   |   |
| FN1948  |                        |                      |          |          |      |     |            |           | AAL94044.1  Hypothetical protein                                       |                         |    |    |   |   |   |   |
|         |                        |                      |          |          | 7    |     | 7.0000     |           |                                                                        |                         |    |    |   |   |   |   |
| FN1949  | 2.365                  | 9.195                | 2.717e-2 | 3.982e-2 | 24   | 10  | 32.8834    | 12.1471   | AAL94045.1  Xaa-Pro dipeptidase                                        |                         |    |    |   |   |   |   |
|         |                        |                      |          |          | 77   | 7   | 77.0000    | 9.1826    |                                                                        |                         |    |    |   |   |   |   |
| FN1950  |                        |                      |          |          |      |     |            |           | AAL94046.1  Serine protease                                            |                         |    |    |   |   |   |   |
|         |                        |                      |          |          |      | 55  |            | 66.8088   |                                                                        |                         |    |    |   |   |   |   |
| FN1951  |                        |                      |          |          |      |     |            |           | AAL94047.1  ATPase associated with chromosome architecture/replication |                         |    |    |   |   |   |   |
|         |                        |                      |          |          |      | 3   |            | 3.6441    |                                                                        |                         |    |    |   |   |   |   |
| FN1956  |                        |                      |          |          |      |     |            |           | AAL94052.1  Hypothetical protein                                       |                         |    |    |   |   |   |   |
|         |                        |                      |          |          | 15   |     | 15.0000    |           |                                                                        |                         |    |    |   |   |   |   |
| FN1964  | -0.609                 | 9.042                | 5.524e-5 | 5.711e-6 | 14   | 24  | 19.1820    | 29.1529   | AAL94054.1  O-linked GLCNAC transferase                                |                         |    |    |   |   |   |   |
|         |                        |                      |          |          | 18   | 21  | 18.0000    | 27.5479   |                                                                        |                         |    |    |   |   |   |   |
| FN1965  | 0.486                  | 10.923               | 3.23e-2  | 4.977e-2 | 44   | 30  | 60.2862    | 36.4412   | AAL94055.1  Tetratricopeptide repeat family protein                    |                         |    |    |   |   |   |   |
|         |                        |                      |          |          | 44   | 29  | 44.0000    | 38.0424   |                                                                        |                         |    |    |   |   |   |   |
| FN1966  | -0.851                 | 10.944               | 7.543e-3 | 7.998e-3 | 30   | 42  | 41.1042    | 51.0177   | AAL94056.1  Hypothetical protein                                       |                         |    |    |   |   |   |   |
|         |                        |                      |          |          | 25   | 52  | 25.0000    | 68.2139   |                                                                        |                         |    |    |   |   |   |   |
| FN1970  |                        |                      |          |          |      |     |            |           | AAL94060.1  Hemin-binding periplasmic protein hmuT precursor           |                         |    |    |   |   |   |   |
|         |                        |                      |          |          |      | 4   |            | 4.8588    |                                                                        |                         |    |    |   |   |   |   |
| FN1971  |                        |                      |          |          |      |     |            |           | AAL94061.1  Hemin receptor                                             |                         |    |    |   |   |   |   |
|         | 0.778                  | 9.641                |          |          |      | 15  |            | 18.2206   |                                                                        |                         |    |    |   |   |   |   |
| FN1972  |                        |                      |          |          |      |     |            |           | AAL94062.1  unknown                                                    |                         |    |    |   |   |   |   |
|         | 2.277                  | 9.584                |          |          | 37   | 19  | 37.0000    | 24.9243   |                                                                        |                         |    |    |   |   |   |   |
| FN1973  |                        |                      |          |          |      |     |            |           | AAL94063.1  Translation initiation inhibitor                           |                         |    |    |   |   |   |   |
|         | 2.182                  | 12.026               | 1.656e-3 | 9.815e-4 | 111  | 24  | 152.0855   | 29.1529   |                                                                        |                         |    |    |   |   |   |   |
|         |                        |                      |          |          | 123  | 24  | 123.0000   | 31.4833   |                                                                        |                         |    |    |   |   |   |   |

Show detected proteins only  
 Show all proteins  
 Filter by category:

Proteins found: 1338

Enter (or paste) list of ORFs

Find ORFs

Test Cutoff

q-Value p-Value

.005

| Signif | Direction | Applies To   |
|--------|-----------|--------------|
| yes    | +         | ratios, bars |
| no     | n/a       | bars         |
| yes    | -         | ratios, bars |
| yes    | +         | p-, q-Values |
| yes    | -         | p-, q-Values |

Dot Plots Dot Plots

Fn Summary Table FnPg vs Fn FnSg vs Fn FnPgSg vs Fn FnPgSg vs FnPg FnSg vs FnPg FnPgSg vs FnSg Fn Coverage

| Protein | FnPg vs Fn             |                      |          |          | Raw  |     | Normalized |          | Description                                           | Log <sub>2</sub> Ratios |    |    |   |   |   |   |
|---------|------------------------|----------------------|----------|----------|------|-----|------------|----------|-------------------------------------------------------|-------------------------|----|----|---|---|---|---|
|         | Log <sub>2</sub> Ratio | Log <sub>2</sub> Sum | q-Value  | p-Value  | FnPg | Fn  | FnPg       | Fn       |                                                       | -6                      | -4 | -2 | 0 | 2 | 4 | 6 |
| FN1974  |                        |                      |          |          |      | 6   |            | 7.2882   | AAL94064.1  DNA/RNA helicase (DEAD/DEAH BOX family)   |                         |    |    |   |   |   |   |
|         |                        |                      |          |          |      | 8   |            | 10.4944  |                                                       |                         |    |    |   |   |   |   |
| FN1975  | -1.400                 | 13.702               | 4.849e-4 | 1.476e-4 | 49   | 164 | 67.1369    | 199.2118 | AAL94065.1  ATP-dependent RNA helicase                |                         |    |    |   |   |   |   |
|         |                        |                      |          |          | 75   | 134 | 75.0000    | 175.7819 |                                                       |                         |    |    |   |   |   |   |
| FN1976  | -0.800                 | 10.426               | 7.915e-2 | 1.675e-1 | 6    | 46  | 8.2208     | 55.8765  | AAL94066.1  4-amino-4-deoxychorismate lyase           |                         |    |    |   |   |   |   |
|         |                        |                      |          |          | 48   | 32  | 48.0000    | 41.9778  |                                                       |                         |    |    |   |   |   |   |
| FN1977  | 0.237                  | 6.286                |          |          | 7    | 8   | 9.5910     | 9.7176   | AAL94067.1  Cell cycle protein MesJ                   |                         |    |    |   |   |   |   |
|         |                        |                      |          |          |      | 5   |            | 6.5590   |                                                       |                         |    |    |   |   |   |   |
| FN1978  | -1.935                 | 13.741               | 2.614e-3 | 1.852e-3 | 18   | 178 | 24.6625    | 216.2177 | AAL94068.1  Cell division protein ftsH                |                         |    |    |   |   |   |   |
|         |                        |                      |          |          | 95   | 184 | 95.0000    | 241.3722 |                                                       |                         |    |    |   |   |   |   |
| FN1979  | -2.888                 | 10.456               | 2.983e-4 | 7.006e-5 | 15   | 75  | 20.5521    | 91.1030  | AAL94069.1  SSU ribosomal protein S15P                |                         |    |    |   |   |   |   |
|         |                        |                      |          |          | 7    | 86  | 7.0000     | 112.8153 |                                                       |                         |    |    |   |   |   |   |
| FN1983  | -1.070                 | 16.582               | 6.53e-4  | 2.317e-4 | 139  | 380 | 190.4494   | 461.5884 | AAL94073.1  Alkyl hydroperoxide reductase C22 protein |                         |    |    |   |   |   |   |
|         |                        |                      |          |          | 242  | 340 | 242.0000   | 446.0138 |                                                       |                         |    |    |   |   |   |   |
| FN1984  | 0.205                  | 16.782               | 1.926e-1 | 5.319e-1 | 348  | 276 | 476.8087   | 335.2589 | AAL94074.1  Thioredoxin reductase                     |                         |    |    |   |   |   |   |
|         |                        |                      |          |          | 244  | 221 | 244.0000   | 289.9090 |                                                       |                         |    |    |   |   |   |   |
| FN1985  | -0.583                 | 12.690               | 1.336e-1 | 3.273e-1 | 13   | 72  | 17.8118    | 87.4588  | AAL94075.1  Inner membrane protein                    |                         |    |    |   |   |   |   |
|         |                        |                      |          |          | 115  | 85  | 115.0000   | 111.5034 |                                                       |                         |    |    |   |   |   |   |
| FN1986  | -0.000                 | 16.421               | 3.094e-1 | 9.99e-1  | 255  | 248 | 349.3857   | 301.2471 | AAL94076.1  Hypothetical protein                      |                         |    |    |   |   |   |   |
|         |                        |                      |          |          | 243  | 222 | 243.0000   | 291.2208 |                                                       |                         |    |    |   |   |   |   |
| FN1987  | 2.122                  | 7.705                |          |          | 22   | 6   | 30.1431    | 7.2882   | AAL94077.1  Transcriptional regulator, GntR family    |                         |    |    |   |   |   |   |
|         |                        |                      |          |          |      | 5   |            | 6.5590   |                                                       |                         |    |    |   |   |   |   |
| FN1988  | 3.596                  | 15.052               | 3.588e-2 | 5.713e-2 | 221  | 43  | 302.8009   | 52.2324  | AAL94078.1  Tyrosine phenol-lyase                     |                         |    |    |   |   |   |   |
|         |                        |                      |          |          | 979  | 41  | 979.0000   | 53.7840  |                                                       |                         |    |    |   |   |   |   |
| FN1989  |                        |                      |          |          |      |     |            |          | AAL94079.1  Sodium-dependent tyrosine transporter     |                         |    |    |   |   |   |   |
|         |                        |                      |          |          | 16   |     | 16.0000    |          |                                                       |                         |    |    |   |   |   |   |
| FN1991  | 0.141                  | 17.361               | 4.567e-2 | 7.922e-2 | 334  | 326 | 457.6267   | 395.9942 | AAL94081.1  Glucosamine-1-phosphate acetyltransferase |                         |    |    |   |   |   |   |
|         |                        |                      |          |          | 404  | 294 | 404.0000   | 385.6708 |                                                       |                         |    |    |   |   |   |   |
| FN1992  | 0.581                  | 16.276               | 1.639e-2 | 2.083e-2 | 219  | 187 | 300.0606   | 227.1501 | AAL94082.1  Ribose-phosphate pyrophosphokinase        |                         |    |    |   |   |   |   |
|         |                        |                      |          |          | 389  | 178 | 389.0000   | 233.5013 |                                                       |                         |    |    |   |   |   |   |
| FN1993  | -0.018                 | 5.187                |          |          |      | 5   |            | 6.0735   | AAL94083.1  SUA5 protein                              |                         |    |    |   |   |   |   |
|         |                        |                      |          |          | 6    |     | 6.0000     |          |                                                       |                         |    |    |   |   |   |   |

Show detected proteins only  
 Show all proteins  
 Filter by category:

Proteins found: 1338

Test Cutoff

| Signif | Direction | Applies To   |
|--------|-----------|--------------|
| yes    | +         | ratios, bars |
| no     | n/a       | bars         |
| yes    | -         | ratios, bars |
| yes    | +         | p-, q-Values |
| yes    | -         |              |

Fn Summary Table FnPg vs Fn FnSg vs Fn FnPgSg vs Fn FnPgSg vs FnPg FnSg vs FnPg FnPgSg vs FnSg Fn Coverage

| Protein | FnPg vs Fn             |                      |          |           | Raw  |     | Normalized |          | Description                                                          | Log <sub>2</sub> Ratios |    |    |   |   |   |   |
|---------|------------------------|----------------------|----------|-----------|------|-----|------------|----------|----------------------------------------------------------------------|-------------------------|----|----|---|---|---|---|
|         | Log <sub>2</sub> Ratio | Log <sub>2</sub> Sum | q-Value  | p-Value   | FnPg | Fn  | FnPg       | Fn       |                                                                      | -6                      | -4 | -2 | 0 | 2 | 4 | 6 |
| FN1994  | -0.089                 | 11.457               | 2.786e-1 | 8.611e-1  | 59   | 49  | 80.8383    | 59.5206  | AAL94084.1  Hypothetical protein                                     |                         |    |    |   |   |   |   |
|         |                        |                      |          |           | 22   | 38  | 22.0000    | 49.8486  |                                                                      |                         |    |    |   |   |   |   |
| FN1995  | -1.152                 | 5.152                |          |           |      | 6   |            | 7.2882   | AAL94085.1  Hypothetical protein                                     |                         |    |    |   |   |   |   |
|         |                        |                      |          |           | 4    | 8   | 4.0000     | 10.4944  |                                                                      |                         |    |    |   |   |   |   |
| FN2001  | 0.901                  | 7.743                |          |           |      | 9   |            | 10.9324  | AAL94091.1  Hypothetical protein                                     |                         |    |    |   |   |   |   |
|         |                        |                      |          |           | 20   | 8   | 20.0000    | 10.4944  |                                                                      |                         |    |    |   |   |   |   |
| FN2007  | -0.841                 | 8.192                | 5.876e-2 | 1.124e-1  | 15   | 15  | 20.5521    | 18.2206  | AAL94097.1  Glutathione peroxidase                                   |                         |    |    |   |   |   |   |
|         |                        |                      |          |           | 5    | 21  | 5.0000     | 27.5479  |                                                                      |                         |    |    |   |   |   |   |
| FN2008  | 2.271                  | 6.224                |          |           |      |     |            |          | AAL94098.1  Glycine betaine transport ATP-binding protein            |                         |    |    |   |   |   |   |
|         |                        |                      |          |           | 19   | 3   | 19.0000    | 3.9354   |                                                                      |                         |    |    |   |   |   |   |
| FN2009  |                        |                      |          |           |      |     |            |          | AAL94099.1  Glycine betaine transport system permease protein        |                         |    |    |   |   |   |   |
|         |                        |                      |          |           | 8    |     | 8.0000     |          |                                                                      |                         |    |    |   |   |   |   |
| FN2011  | -1.337                 | 14.011               | 5.679e-3 | 5.396e-3  | 37   | 171 | 50.6952    | 207.7148 | AAL94101.1  Valyl-tRNA synthetase                                    |                         |    |    |   |   |   |   |
|         |                        |                      |          |           | 111  | 153 | 111.0000   | 200.7062 |                                                                      |                         |    |    |   |   |   |   |
| FN2013  | -0.281                 | 4.924                |          |           |      | 5   |            | 6.0735   | AAL94103.1  GTP-binding protein                                      |                         |    |    |   |   |   |   |
|         |                        |                      |          |           | 5    |     | 5.0000     |          |                                                                      |                         |    |    |   |   |   |   |
| FN2014  | -1.417                 | 15.225               | 3.257e-5 | 2.448e-6  | 77   | 275 | 105.5008   | 334.0442 | AAL94104.1  ATP-dependent protease La                                |                         |    |    |   |   |   |   |
|         |                        |                      |          |           | 134  | 233 | 134.0000   | 305.6506 |                                                                      |                         |    |    |   |   |   |   |
| FN2015  | -0.748                 | 13.545               | 2.051e-3 | 1.34e-3   | 64   | 108 | 87.6890    | 131.1883 | AAL94105.1  ATP-dependent clp protease ATP-binding subunit clpX      |                         |    |    |   |   |   |   |
|         |                        |                      |          |           | 81   | 116 | 81.0000    | 152.1694 |                                                                      |                         |    |    |   |   |   |   |
| FN2016  | -0.730                 | 10.446               |          |           |      | 36  |            | 43.7294  | AAL94106.1  ATP-dependent Clp protease proteolytic subunit           |                         |    |    |   |   |   |   |
|         |                        |                      |          |           | 29   | 40  | 29.0000    | 52.4722  |                                                                      |                         |    |    |   |   |   |   |
| FN2017  | -0.572                 | 18.961               | 3.324e-2 | 5.171e-2  | 543  | 728 | 743.9859   | 884.3061 | AAL94107.1  Trigger factor, ppiase                                   |                         |    |    |   |   |   |   |
|         |                        |                      |          |           | 428  | 654 | 428.0000   | 857.9206 |                                                                      |                         |    |    |   |   |   |   |
| FN2018  | -1.837                 | 9.299                | 1.959e-3 | 1.25e-3   | 15   | 36  | 20.5521    | 43.7294  | AAL94108.1  Single-stranded-DNA-specific exonuclease recJ            |                         |    |    |   |   |   |   |
|         |                        |                      |          |           | 6    | 39  | 6.0000     | 51.1604  |                                                                      |                         |    |    |   |   |   |   |
| FN2019  | -0.242                 | 10.866               |          |           | 29   | 32  | 39.7341    | 38.8706  | AAL94109.1  Ribosome-binding factor A                                |                         |    |    |   |   |   |   |
|         |                        |                      |          |           |      | 42  |            | 55.0958  |                                                                      |                         |    |    |   |   |   |   |
| FN2020  | -0.269                 | 16.155               | 7.182e-3 | 7.491e-3  | 190  | 242 | 260.3266   | 293.9589 | AAL94110.1  Bacterial Protein Translation Initiation Factor 2 (IF-2) |                         |    |    |   |   |   |   |
|         |                        |                      |          |           | 232  | 228 | 232.0000   | 299.0916 |                                                                      |                         |    |    |   |   |   |   |
| FN2022  | -1.021                 | 12.451               | 1.198e-8 | 4.849e-11 | 38   | 88  | 52.0653    | 106.8941 | AAL94112.1  N utilization substance protein A                        |                         |    |    |   |   |   |   |
|         |                        |                      |          |           | 53   | 81  | 53.0000    | 106.2562 |                                                                      |                         |    |    |   |   |   |   |

Show detected proteins only  
 Show all proteins  
 Filter by category:

Proteins found: 1338

Enter (or paste) list of ORFs

Test Cutoff

| Signif | Direction | Applies To   |
|--------|-----------|--------------|
| yes    | +         | ratios, bars |
| no     | n/a       | bars         |
| yes    | -         | ratios, bars |
| yes    | +         | p-, q-Values |
| yes    | -         |              |



Fn Summary Table FnPg vs Fn FnSg vs Fn FnPgSg vs Fn FnPgSg vs FnPg FnSg vs FnPg FnPgSg vs FnSg Fn Coverage

| Protein | FnPg vs Fn             |                      |          |          | Raw  |     | Normalized |          | Description                                             | Log <sub>2</sub> Ratios |    |    |   |   |   |   |
|---------|------------------------|----------------------|----------|----------|------|-----|------------|----------|---------------------------------------------------------|-------------------------|----|----|---|---|---|---|
|         | Log <sub>2</sub> Ratio | Log <sub>2</sub> Sum | q-Value  | p-Value  | FnPg | Fn  | FnPg       | Fn       |                                                         | -6                      | -4 | -2 | 0 | 2 | 4 | 6 |
| FN2023  | 0.590                  | 7.446                | 1.739e-1 | 4.628e-1 | 20   | 8   | 27.4028    | 9.7176   | AAL94113.1  Hypothetical cytosolic protein              |                         |    |    |   |   |   |   |
|         |                        |                      |          |          | 5    | 9   | 5.0000     | 11.8062  |                                                         |                         |    |    |   |   |   |   |
| FN2030  | -2.984                 | 13.505               | 3.26e-5  | 2.451e-6 | 18   | 265 | 24.6625    | 321.8971 | AAL94115.1  Inorganic pyrophosphatase                   |                         |    |    |   |   |   |   |
|         |                        |                      |          |          | 52   | 217 | 52.0000    | 284.6617 |                                                         |                         |    |    |   |   |   |   |
| FN2031  | -1.652                 | 6.561                |          |          | 4    | 10  | 5.4806     | 12.1471  | AAL94116.1  Thiamine biosynthesis lipoprotein appE      |                         |    |    |   |   |   |   |
|         |                        |                      |          |          |      | 17  |            | 22.3007  |                                                         |                         |    |    |   |   |   |   |
| FN2033  | 0.225                  | 8.498                |          |          | 15   | 16  | 20.5521    | 19.4353  | AAL94118.1  Guanylate kinase                            |                         |    |    |   |   |   |   |
|         |                        |                      |          |          |      | 12  |            | 15.7417  |                                                         |                         |    |    |   |   |   |   |
| FN2034  | -0.476                 | 8.706                | 9.662e-2 | 2.172e-1 | 18   | 17  | 24.6625    | 20.6500  | AAL94119.1  Protein yicC                                |                         |    |    |   |   |   |   |
|         |                        |                      |          |          | 10   | 21  | 10.0000    | 27.5479  |                                                         |                         |    |    |   |   |   |   |
| FN2035  | -0.356                 | 18.018               | 2.15e-2  | 2.966e-2 | 375  | 490 | 513.8024   | 595.2060 | AAL94120.1  DNA-directed RNA polymerase beta' chain     |                         |    |    |   |   |   |   |
|         |                        |                      |          |          | 397  | 435 | 397.0000   | 570.6353 |                                                         |                         |    |    |   |   |   |   |
| FN2036  | -0.901                 | 17.232               | 3.329e-3 | 2.596e-3 | 163  | 469 | 223.3328   | 569.6972 | AAL94121.1  DNA-directed RNA polymerase beta chain      |                         |    |    |   |   |   |   |
|         |                        |                      |          |          | 351  | 383 | 351.0000   | 502.4214 |                                                         |                         |    |    |   |   |   |   |
| FN2037  | 0.290                  | 19.709               | 2.004e-1 | 5.588e-1 | 1107 | 682 | 1516.7448  | 828.4296 | AAL94122.1  LSU ribosomal protein L12P (L7/L12)         |                         |    |    |   |   |   |   |
|         |                        |                      |          |          | 531  | 645 | 531.0000   | 846.1144 |                                                         |                         |    |    |   |   |   |   |
| FN2038  | -0.837                 | 16.073               | 4.147e-2 | 6.929e-2 | 216  | 242 | 295.9502   | 293.9589 | AAL94123.1  LSU ribosomal protein L10P                  |                         |    |    |   |   |   |   |
|         |                        |                      |          |          | 97   | 311 | 97.0000    | 407.9714 |                                                         |                         |    |    |   |   |   |   |
| FN2039  | -0.613                 | 16.846               | 1.035e-3 | 4.962e-4 | 214  | 349 | 293.2099   | 423.9325 | AAL94124.1  LSU ribosomal protein L1P                   |                         |    |    |   |   |   |   |
|         |                        |                      |          |          | 262  | 324 | 262.0000   | 425.0249 |                                                         |                         |    |    |   |   |   |   |
| FN2040  | -1.158                 | 12.697               | 7.93e-3  | 8.544e-3 | 57   | 114 | 78.0980    | 138.4765 | AAL94125.1  LSU ribosomal protein L11P                  |                         |    |    |   |   |   |   |
|         |                        |                      |          |          | 31   | 80  | 31.0000    | 104.9444 |                                                         |                         |    |    |   |   |   |   |
| FN2041  | 0.560                  | 12.042               | 1.587e-1 | 4.09e-1  | 91   | 47  | 124.6827   | 57.0912  | AAL94126.1  Transcription antitermination protein nusG  |                         |    |    |   |   |   |   |
|         |                        |                      |          |          | 33   | 38  | 33.0000    | 49.8486  |                                                         |                         |    |    |   |   |   |   |
| FN2045  |                        |                      |          |          |      |     |            |          | AAL94129.1  Ferric uptake regulation protein            |                         |    |    |   |   |   |   |
|         |                        |                      |          |          | 18   |     | 18.0000    |          |                                                         |                         |    |    |   |   |   |   |
| FN2046  |                        |                      |          |          |      |     |            |          | AAL94130.1  Acetyltransferase                           |                         |    |    |   |   |   |   |
|         |                        |                      |          |          | 24   |     | 24.0000    |          |                                                         |                         |    |    |   |   |   |   |
| FN2047  | -3.129                 | 16.328               | 1.148e-6 | 3.253e-8 | 54   | 685 | 73.9876    | 832.0738 | AAL94131.1  Fusobacterium outer membrane protein family |                         |    |    |   |   |   |   |
|         |                        |                      |          |          | 120  | 659 | 120.0000   | 864.4797 |                                                         |                         |    |    |   |   |   |   |
| FN2048  | -0.332                 | 15.532               |          |          |      | 198 |            | 240.5118 | AAL94132.1  Outer membrane protein                      |                         |    |    |   |   |   |   |
|         |                        |                      |          |          | 194  | 189 | 194.0000   | 247.9312 |                                                         |                         |    |    |   |   |   |   |

Show detected proteins only  
 Show all proteins  
 Filter by category:

Proteins found: 1338

Test Cutoff

| Signif | Direction | Applies To   |
|--------|-----------|--------------|
| yes    | +         | ratios, bars |
| no     | n/a       | bars         |
| yes    | -         | ratios, bars |
| yes    | +         | p-, q-Values |
| yes    | -         |              |

Fn Summary Table

FnPg vs Fn

FnSg vs Fn

FnPgSg vs Fn

FnPgSg vs FnPg

FnSg vs FnPg

FnPgSg vs FnSg

Fn Coverage

| Protein | FnPg vs Fn             |                      |          |          | Raw  |     | Normalized |          | Description                                             | Log <sub>2</sub> Ratios |    |    |   |   |   |   |
|---------|------------------------|----------------------|----------|----------|------|-----|------------|----------|---------------------------------------------------------|-------------------------|----|----|---|---|---|---|
|         | Log <sub>2</sub> Ratio | Log <sub>2</sub> Sum | q-Value  | p-Value  | FnPg | Fn  | FnPg       | Fn       |                                                         | -6                      | -4 | -2 | 0 | 2 | 4 | 6 |
| FN2049  | 1.100                  | 17.889               | 6.173e-2 | 1.209e-1 | 753  | 270 | 1031.7153  | 327.9707 | AAL94133.1  unknown                                     |                         |    |    |   |   |   |   |
|         |                        |                      |          |          | 411  | 263 | 411.0000   | 345.0048 |                                                         |                         |    |    |   |   |   |   |
| FN2050  | -0.361                 | 15.648               | 1.844e-1 | 5.025e-1 | 240  | 195 | 328.8336   | 236.8677 | AAL94134.1  Hypothetical membrane-spanning protein      |                         |    |    |   |   |   |   |
|         |                        |                      |          |          | 71   | 211 | 71.0000    | 276.7909 |                                                         |                         |    |    |   |   |   |   |
| FN2051  | -0.589                 | 13.778               | 8.361e-2 | 1.803e-1 | 106  | 113 | 145.2348   | 137.2618 | AAL94135.1  unknown                                     |                         |    |    |   |   |   |   |
|         |                        |                      |          |          | 48   | 117 | 48.0000    | 153.4812 |                                                         |                         |    |    |   |   |   |   |
| FN2052  | -1.626                 | 14.269               | 5.543e-3 | 5.222e-3 | 89   | 210 | 121.9424   | 255.0883 | AAL94136.1  unknown                                     |                         |    |    |   |   |   |   |
|         |                        |                      |          |          | 38   | 182 | 38.0000    | 238.7486 |                                                         |                         |    |    |   |   |   |   |
| FN2053  | -0.050                 | 12.119               | 2.835e-1 | 8.823e-1 | 30   | 61  | 41.1042    | 74.0971  | AAL94137.1  Serine/threonine sodium symporter           |                         |    |    |   |   |   |   |
|         |                        |                      |          |          | 90   | 47  | 90.0000    | 61.6548  |                                                         |                         |    |    |   |   |   |   |
| FN2054  | -0.665                 | 15.074               | 8.638e-4 | 3.721e-4 | 100  | 195 | 137.0140   | 236.8677 | AAL94138.1  Glucose-6-phosphate isomerase               |                         |    |    |   |   |   |   |
|         |                        |                      |          |          | 158  | 176 | 158.0000   | 230.8777 |                                                         |                         |    |    |   |   |   |   |
| FN2058  | 0.479                  | 18.198               | 1.417e-1 | 3.525e-1 | 683  | 374 | 935.8055   | 454.3001 | AAL94142.1  Fusobacterium outer membrane protein family |                         |    |    |   |   |   |   |
|         |                        |                      |          |          | 359  | 362 | 359.0000   | 474.8735 |                                                         |                         |    |    |   |   |   |   |
| FN2059  | -0.332                 | 15.532               |          |          |      | 198 |            | 240.5118 | AAL94143.1  Outer membrane protein                      |                         |    |    |   |   |   |   |
|         |                        |                      |          |          | 194  | 189 | 194.0000   | 247.9312 |                                                         |                         |    |    |   |   |   |   |
| FN2060  | 1.100                  | 17.889               | 6.173e-2 | 1.209e-1 | 753  | 270 | 1031.7153  | 327.9707 | AAL94144.1  unknown                                     |                         |    |    |   |   |   |   |
|         |                        |                      |          |          | 411  | 263 | 411.0000   | 345.0048 |                                                         |                         |    |    |   |   |   |   |
| FN2061  | -0.361                 | 15.648               | 1.844e-1 | 5.025e-1 | 240  | 195 | 328.8336   | 236.8677 | AAL94145.1  Hypothetical membrane-spanning protein      |                         |    |    |   |   |   |   |
|         |                        |                      |          |          | 71   | 211 | 71.0000    | 276.7909 |                                                         |                         |    |    |   |   |   |   |
| FN2062  | -0.589                 | 13.778               | 8.361e-2 | 1.803e-1 | 106  | 113 | 145.2348   | 137.2618 | AAL94146.1  unknown                                     |                         |    |    |   |   |   |   |
|         |                        |                      |          |          | 48   | 117 | 48.0000    | 153.4812 |                                                         |                         |    |    |   |   |   |   |
| FN2063  | -1.626                 | 14.269               | 5.543e-3 | 5.222e-3 | 89   | 210 | 121.9424   | 255.0883 | AAL94147.1  unknown                                     |                         |    |    |   |   |   |   |
|         |                        |                      |          |          | 38   | 182 | 38.0000    | 238.7486 |                                                         |                         |    |    |   |   |   |   |
| FN2067  |                        |                      |          |          |      | 7   |            | 8.5029   | AAL94151.1  Thiol:disulfide interchange protein tlpA    |                         |    |    |   |   |   |   |
|         |                        |                      |          |          |      | 5   |            | 6.5590   |                                                         |                         |    |    |   |   |   |   |
| FN2068  | 1.581                  | 7.165                | 9.753e-3 | 1.102e-2 | 12   | 6   | 16.4417    | 7.2882   | AAL94152.1  dGTP triphosphohydrolase                    |                         |    |    |   |   |   |   |
|         |                        |                      |          |          | 25   | 5   | 25.0000    | 6.5590   |                                                         |                         |    |    |   |   |   |   |
| FN2069  |                        |                      |          |          |      |     |            |          | AAL94153.1  Amino acid carrier protein alsT             |                         |    |    |   |   |   |   |
|         |                        |                      |          |          |      | 4   |            | 5.2472   |                                                         |                         |    |    |   |   |   |   |
| FN2070  | -0.830                 | 7.749                |          |          |      | 16  |            | 19.4353  | AAL94154.1  Cobyric acid synthase                       |                         |    |    |   |   |   |   |
|         |                        |                      |          |          | 11   | 15  | 11.0000    | 19.6771  |                                                         |                         |    |    |   |   |   |   |

Show detected proteins only  
 Show all proteins  
 Filter by category:

Proteins found:  
1338

Enter (or paste) list of ORFs

Find ORFs

Test Cutoff

q-Value

p-Value

.005

| Signif | Direction | Applies To   |
|--------|-----------|--------------|
| yes    | +         | ratios, bars |
| no     | n/a       | bars         |
| yes    | -         | ratios, bars |
| yes    | +         | p-, q-Values |
| yes    | -         | p-, q-Values |

Dot Plots

Dot Plots

Fn Summary Table FnPg vs Fn FnSg vs Fn FnPgSg vs Fn FnPgSg vs FnPg FnSg vs FnPg FnPgSg vs FnSg Fn Coverage

| Protein | FnPg vs Fn             |                      |          |          | Raw  |      | Normalized |           | Description                                                    | Log <sub>2</sub> Ratios |    |    |   |   |   |   |
|---------|------------------------|----------------------|----------|----------|------|------|------------|-----------|----------------------------------------------------------------|-------------------------|----|----|---|---|---|---|
|         | Log <sub>2</sub> Ratio | Log <sub>2</sub> Sum | q-Value  | p-Value  | FnPg | Fn   | FnPg       | Fn        |                                                                | -6                      | -4 | -2 | 0 | 2 | 4 | 6 |
| FN2073  | 0.466                  | 9.147                | 1.814e-1 | 4.908e-1 | 8    | 15   | 10.9611    | 18.2206   | AAL94157.1  Adenine phosphoribosyltransferase                  |                         |    |    |   |   |   |   |
|         |                        |                      |          |          | 45   | 17   | 45.0000    | 22.3007   |                                                                |                         |    |    |   |   |   |   |
| FN2075  | -1.552                 | 10.261               | 2.351e-6 | 9.778e-8 | 16   | 48   | 21.9222    | 58.3059   | AAL94159.1  Hypothetical protein                               |                         |    |    |   |   |   |   |
|         |                        |                      |          |          | 19   | 47   | 19.0000    | 61.6548   |                                                                |                         |    |    |   |   |   |   |
| FN2078  | -0.696                 | 3.866                |          |          |      | 4    |            | 4.8588    | AAL94162.1  Transcriptional regulator, DeoR family             |                         |    |    |   |   |   |   |
|         |                        |                      |          |          | 3    |      | 3.0000     |           |                                                                |                         |    |    |   |   |   |   |
| FN2081  |                        |                      |          |          |      | 20   |            | 24.2941   | AAL94165.1  ABC transporter substrate-binding protein          |                         |    |    |   |   |   |   |
|         |                        |                      |          |          |      | 17   |            | 22.3007   |                                                                |                         |    |    |   |   |   |   |
| FN2082  | 0.066                  | 20.838               | 2.795e-1 | 8.648e-1 | 599  | 1045 | 820.7138   | 1269.3680 | AAL94166.1  Formate--tetrahydrofolate ligase                   |                         |    |    |   |   |   |   |
|         |                        |                      |          |          | 1981 | 1073 | 1981.0000  | 1407.5671 |                                                                |                         |    |    |   |   |   |   |
| FN2093  | -0.816                 | 10.423               | 5.559e-2 | 1.038e-1 | 32   | 41   | 43.8445    | 49.8030   | AAL94177.1  General secretion pathway protein G                |                         |    |    |   |   |   |   |
|         |                        |                      |          |          | 12   | 37   | 12.0000    | 48.5368   |                                                                |                         |    |    |   |   |   |   |
| FN2098  |                        |                      |          |          | 3    |      | 4.1104     |           | AAL94182.1  MRP-family nucleotide-binding protein              |                         |    |    |   |   |   |   |
|         |                        |                      |          |          | 9    |      | 9.0000     |           |                                                                |                         |    |    |   |   |   |   |
| FN2100  | -1.098                 | 11.054               | 2.063e-3 | 1.352e-3 | 19   | 56   | 26.0327    | 68.0235   | AAL94184.1  Hypothetical protein                               |                         |    |    |   |   |   |   |
|         |                        |                      |          |          | 37   | 51   | 37.0000    | 66.9021   |                                                                |                         |    |    |   |   |   |   |
| FN2102  | -0.535                 | 8.617                | 5.344e-2 | 9.817e-2 | 16   | 22   | 21.9222    | 26.7235   | AAL94186.1  ABC transporter ATP-binding protein                |                         |    |    |   |   |   |   |
|         |                        |                      |          |          | 11   | 16   | 11.0000    | 20.9889   |                                                                |                         |    |    |   |   |   |   |
| FN2103  | -0.584                 | 19.422               | 1.5e-2   | 1.858e-2 | 598  | 873  | 819.3436   | 1060.4385 | AAL94187.1  tricarboxylate-binding protein                     |                         |    |    |   |   |   |   |
|         |                        |                      |          |          | 550  | 756  | 550.0000   | 991.7248  |                                                                |                         |    |    |   |   |   |   |
| FN2105  | -0.841                 | 6.455                |          |          |      | 12   |            | 14.5765   | AAL94189.1  tricarboxylate transport membrane protein RctA     |                         |    |    |   |   |   |   |
|         |                        |                      |          |          | 7    | 8    | 7.0000     | 10.4944   |                                                                |                         |    |    |   |   |   |   |
| FN2106  | 0.480                  | 15.105               | 1.619e-1 | 4.202e-1 | 247  | 131  | 338.4245   | 159.1265  | AAL94190.1  Transporter                                        |                         |    |    |   |   |   |   |
|         |                        |                      |          |          | 105  | 121  | 105.0000   | 158.7284  |                                                                |                         |    |    |   |   |   |   |
| FN2107  | -1.519                 | 11.505               | 5.936e-3 | 5.733e-3 | 37   | 66   | 50.6952    | 80.1706   | AAL94191.1  Galactokinase                                      |                         |    |    |   |   |   |   |
|         |                        |                      |          |          | 13   | 78   | 13.0000    | 102.3208  |                                                                |                         |    |    |   |   |   |   |
| FN2108  | -0.937                 | 10.048               | 5.403e-3 | 5.046e-3 | 19   | 32   | 26.0327    | 38.8706   | AAL94192.1  Galactose-1-phosphate uridylyltransferase          |                         |    |    |   |   |   |   |
|         |                        |                      |          |          | 21   | 39   | 21.0000    | 51.1604   |                                                                |                         |    |    |   |   |   |   |
| FN2109  | 0.357                  | 12.048               | 5.849e-2 | 1.117e-1 | 63   | 45   | 86.3188    | 54.6618   | AAL94193.1  UDP-glucose 4-epimerase                            |                         |    |    |   |   |   |   |
|         |                        |                      |          |          | 61   | 46   | 61.0000    | 60.3430   |                                                                |                         |    |    |   |   |   |   |
| FN2116  | -1.796                 | 11.084               |          |          |      | 76   |            | 92.3177   | AAL94200.1  Hypothetical exported 24-amino acid repeat protein |                         |    |    |   |   |   |   |
|         |                        |                      |          |          | 25   | 62   | 25.0000    | 81.3319   |                                                                |                         |    |    |   |   |   |   |

Show detected proteins only  
 Show all proteins  
 Filter by category:

Proteins found: 1338

Enter (or paste) list of ORFs

Find ORFs

Test Cutoff

q-Value .005

p-Value

| Signif | Direction | Applies To   |
|--------|-----------|--------------|
| yes    | +         | ratios, bars |
| no     | n/a       | bars         |
| yes    | -         | ratios, bars |
| yes    | +         | p-, q-Values |
| yes    | -         |              |

Dot Plots Dot Plots

Fn Summary Table FnPg vs Fn FnSg vs Fn FnPgSg vs Fn FnPgSg vs FnPg FnSg vs FnPg FnPgSg vs FnSg Fn Coverage

| Protein | FnPg vs Fn             |                      |          |          | Raw  |     | Normalized |          | Description                                                    | Log <sub>2</sub> Ratios |    |    |   |   |   |   |
|---------|------------------------|----------------------|----------|----------|------|-----|------------|----------|----------------------------------------------------------------|-------------------------|----|----|---|---|---|---|
|         | Log <sub>2</sub> Ratio | Log <sub>2</sub> Sum | q-Value  | p-Value  | FnPg | Fn  | FnPg       | Fn       |                                                                | -6                      | -4 | -2 | 0 | 2 | 4 | 6 |
| FN2117  | -1.864                 | 7.034                |          |          |      | 23  |            | 27.9382  | AAL94201.1  Hypothetical exported 24-amino acid repeat protein |                         |    |    |   |   |   |   |
|         |                        |                      |          |          | 6    | 12  | 6.0000     | 15.7417  |                                                                |                         |    |    |   |   |   |   |
| FN2118  | -2.982                 | 8.596                |          |          |      | 50  |            | 60.7353  | AAL94202.1  Hypothetical exported 24-amino acid repeat protein |                         |    |    |   |   |   |   |
|         |                        |                      |          |          | 7    | 38  | 7.0000     | 49.8486  |                                                                |                         |    |    |   |   |   |   |
| FN2119  | 0.059                  | 10.437               |          |          |      | 32  |            | 38.8706  | AAL94203.1  Hypothetical exported 24-amino acid repeat protein |                         |    |    |   |   |   |   |
|         |                        |                      |          |          | 38   | 26  | 38.0000    | 34.1069  |                                                                |                         |    |    |   |   |   |   |
| FN2120  |                        |                      |          |          |      | 24  |            | 29.1529  | AAL94204.1  Hypothetical exported 24-amino acid repeat protein |                         |    |    |   |   |   |   |
|         |                        |                      |          |          |      | 30  |            | 39.3542  |                                                                |                         |    |    |   |   |   |   |
| FN2121  | -1.562                 | 13.957               | 1.544e-2 | 1.929e-2 | 94   | 171 | 128.7931   | 207.7148 | AAL94205.1  Hypothetical exported 24-amino acid repeat protein |                         |    |    |   |   |   |   |
|         |                        |                      |          |          | 18   | 172 | 18.0000    | 225.6305 |                                                                |                         |    |    |   |   |   |   |
| FN2122  | 0.322                  | 17.106               | 6.198e-2 | 1.216e-1 | 356  | 280 | 487.7698   | 340.1177 | AAL94206.1  Phenylalanyl-tRNA synthetase beta chain            |                         |    |    |   |   |   |   |
|         |                        |                      |          |          | 352  | 253 | 352.0000   | 331.8867 |                                                                |                         |    |    |   |   |   |   |
| FN2123  | -0.043                 | 13.279               | 2.912e-1 | 9.161e-1 | 39   | 77  | 53.4355    | 93.5324  | AAL94207.1  Phenylalanyl-tRNA synthetase alpha chain           |                         |    |    |   |   |   |   |
|         |                        |                      |          |          | 143  | 83  | 143.0000   | 108.8798 |                                                                |                         |    |    |   |   |   |   |
| FN2125  | -1.221                 | 13.987               | 1.167e-2 | 1.362e-2 | 89   | 154 | 121.9424   | 187.0648 | AAL94209.1  DNA gyrase subunit A                               |                         |    |    |   |   |   |   |
|         |                        |                      |          |          | 45   | 154 | 45.0000    | 202.0180 |                                                                |                         |    |    |   |   |   |   |
| FN2126  | -1.937                 | 11.781               | 3.32e-4  | 8.134e-5 | 26   | 95  | 35.6236    | 115.3971 | AAL94210.1  DNA gyrase subunit B                               |                         |    |    |   |   |   |   |
|         |                        |                      |          |          | 25   | 89  | 25.0000    | 116.7507 |                                                                |                         |    |    |   |   |   |   |
| FN2128  |                        |                      |          |          |      | 3   |            | 3.6441   | AAL94212.1  RECF protein                                       |                         |    |    |   |   |   |   |
|         |                        |                      |          |          |      |     |            |          |                                                                |                         |    |    |   |   |   |   |

Show detected proteins only

Show all proteins

Filter by category:

GO: amino acid transport

Proteins found:

1338

Enter (or paste) list of ORFs

Find ORFs

Test Cutoff

q-Value

p-Value

.005

| Signif | Direction | Applies To   |
|--------|-----------|--------------|
| yes    | +         | ratios, bars |
| no     | n/a       | bars         |
| yes    | -         | ratios, bars |
| yes    | +         | p-, q-Values |
| yes    | -         | p-, q-Values |

Dot Plots Dot Plots
