# Supplementary material for: Proteomics of Fusobacterium nucleatum within a model developing oral microbial community
Source: PubMed Central journal article supplement (PMC4234264; doi:10.1002/mbo3.204), 2014-08-25
Supplement: mbo30003-0729-sd7.pdf [file mbo30003-0729-sd7.pdf]

Fn Summary Table FnPg vs Fn FnSg vs Fn FnPgSg vs Fn FnPgSg vs FnPg FnSg vs FnPg FnPgSg vs FnSg Fn Coverage

| Protein | FnSg vs FnPg           |                      |          |          | Raw  |      | Normalized |          | Description                                                    | Log <sub>2</sub> Ratios |    |    |   |   |   |   |
|---------|------------------------|----------------------|----------|----------|------|------|------------|----------|----------------------------------------------------------------|-------------------------|----|----|---|---|---|---|
|         | Log <sub>2</sub> Ratio | Log <sub>2</sub> Sum | q-Value  | p-Value  | FnPg | FnSg | FnPg       | FnSg     |                                                                | -6                      | -4 | -2 | 0 | 2 | 4 | 6 |
| FN0001  | 0.140                  | 7.675                | 3.783e-1 | 7.944e-1 | 15   | 10   | 21.9089    | 13.0162  | AAL94214.1  Chromosomal replication initiator protein dnaA     |                         |    |    |   |   |   |   |
|         |                        |                      |          |          | 5    | 17   | 5.3301     | 17.0000  |                                                                |                         |    |    |   |   |   |   |
| FN0004  | -0.430                 | 10.984               |          |          |      | 35   |            | 45.5566  | AAL94217.1  Inner membrane protein                             |                         |    |    |   |   |   |   |
|         |                        |                      |          |          | 49   | 32   | 52.2349    | 32.0000  |                                                                |                         |    |    |   |   |   |   |
| FN0005  | 0.807                  | 8.020                | 9.688e-2 | 8.044e-2 | 5    | 12   | 7.3030     | 15.6194  | AAL94218.1  Jag protein                                        |                         |    |    |   |   |   |   |
|         |                        |                      |          |          | 16   | 27   | 17.0563    | 27.0000  |                                                                |                         |    |    |   |   |   |   |
| FN0006  | 0.389                  | 9.358                |          |          |      | 22   |            | 28.6356  | AAL94219.1  Thiophene and furan oxidation protein THDF         |                         |    |    |   |   |   |   |
|         |                        |                      |          |          | 21   | 30   | 22.3864    | 30.0000  |                                                                |                         |    |    |   |   |   |   |
| FN0007  | 0.497                  | 7.357                | 1.598e-1 | 2.137e-1 | 6    | 8    | 8.7636     | 10.4129  | AAL94220.1  Glucose inhibited division protein A               |                         |    |    |   |   |   |   |
|         |                        |                      |          |          | 12   | 20   | 12.7922    | 20.0000  |                                                                |                         |    |    |   |   |   |   |
| FN0008  | -0.559                 | 7.026                |          |          |      | 6    |            | 7.8097   | AAL94221.1  Quinolinate synthetase A                           |                         |    |    |   |   |   |   |
|         |                        |                      |          |          | 13   | 11   | 13.8583    | 11.0000  |                                                                |                         |    |    |   |   |   |   |
| FN0009  | -0.306                 | 9.594                |          |          |      |      |            |          | AAL94222.1  L-aspartate oxidase                                |                         |    |    |   |   |   |   |
|         |                        |                      |          |          | 29   | 25   | 30.9146    | 25.0000  |                                                                |                         |    |    |   |   |   |   |
| FN0017  |                        |                      |          |          |      | 4    |            | 5.2065   | AAL94230.1  Hypothetical protein                               |                         |    |    |   |   |   |   |
|         |                        |                      |          |          |      | 7    |            | 7.0000   |                                                                |                         |    |    |   |   |   |   |
| FN0018  | -0.018                 | 9.214                |          |          |      | 18   |            | 23.4291  | AAL94231.1  Hypothetical protein                               |                         |    |    |   |   |   |   |
|         |                        |                      |          |          | 23   | 25   | 24.5184    | 25.0000  |                                                                |                         |    |    |   |   |   |   |
| FN0019  |                        |                      |          |          |      | 6    |            | 7.8097   | AAL94232.1  Transcription-repair coupling factor               |                         |    |    |   |   |   |   |
|         |                        |                      |          |          |      | 4    |            | 4.0000   |                                                                |                         |    |    |   |   |   |   |
| FN0022  | -2.975                 | 10.310               | 1.469e-1 | 1.814e-1 | 128  | 8    | 186.9562   | 10.4129  | AAL94235.1  Hypothetical protein                               |                         |    |    |   |   |   |   |
|         |                        |                      |          |          | 12   | 15   | 12.7922    | 15.0000  |                                                                |                         |    |    |   |   |   |   |
| FN0023  | 0.355                  | 7.459                |          |          |      |      |            |          | AAL94236.1  Short-chain fatty acids transporter                |                         |    |    |   |   |   |   |
|         |                        |                      |          |          | 11   | 15   | 11.7262    | 15.0000  |                                                                |                         |    |    |   |   |   |   |
| FN0024  | 0.113                  | 8.227                |          |          |      | 6    |            | 8.7636   | AAL94237.1  Hypothetical exported 24-amino acid repeat protein |                         |    |    |   |   |   |   |
|         |                        |                      |          |          | 23   | 18   | 24.5184    | 18.0000  |                                                                |                         |    |    |   |   |   |   |
| FN0025  | 0.100                  | 5.900                |          |          |      |      |            |          | AAL94238.1  Hypothetical exported 24-amino acid repeat protein |                         |    |    |   |   |   |   |
|         |                        |                      |          |          | 7    | 8    | 7.4621     | 8.0000   |                                                                |                         |    |    |   |   |   |   |
| FN0030  | -0.171                 | 13.696               | 2.765e-1 | 4.991e-1 | 63   | 90   | 92.0175    | 117.1455 | AAL94243.1  5-nitroimidazole antibiotic resistance protein     |                         |    |    |   |   |   |   |
|         |                        |                      |          |          | 143  | 100  | 152.4408   | 100.0000 |                                                                |                         |    |    |   |   |   |   |
| FN0031  | -0.287                 | 9.576                | 1.584e-1 | 2.104e-1 | 25   | 20   | 36.5149    | 26.0323  | AAL94244.1  unknown                                            |                         |    |    |   |   |   |   |
|         |                        |                      |          |          | 23   | 24   | 24.5184    | 24.0000  |                                                                |                         |    |    |   |   |   |   |

Show detected proteins only  
 Show all proteins  
 Filter by category:

Proteins found: 1313

Enter (or paste) list of ORFs

Find ORFs

Test Cutoff

q-Value

p-Value

.005

| Signif | Direction | Applies To   |
|--------|-----------|--------------|
| yes    | +         | ratios, bars |
| no     | n/a       | bars         |
| yes    | -         | ratios, bars |
| yes    | +         | p-, q-Values |
| yes    | -         | p-, q-Values |

Dot Plots  Dot Plots

Fn Summary Table FnPg vs Fn FnSg vs Fn FnPgSg vs Fn FnPgSg vs FnPg FnSg vs FnPg FnPgSg vs FnSg Fn Coverage

| Protein | FnSg vs FnPg           |                      |          |          | Raw  |      | Normalized |          | Description                                                              | Log <sub>2</sub> Ratios |    |   |   |   |   |  |
|---------|------------------------|----------------------|----------|----------|------|------|------------|----------|--------------------------------------------------------------------------|-------------------------|----|---|---|---|---|--|
|         | Log <sub>2</sub> Ratio | Log <sub>2</sub> Sum | q-Value  | p-Value  | FnPg | FnSg | FnPg       | FnSg     |                                                                          |                         |    |   |   |   |   |  |
|         |                        |                      |          |          |      |      |            | -6       |                                                                          | -4                      | -2 | 0 | 2 | 4 | 6 |  |
| FN0033  | 0.147                  | 12.444               | 3.222e-1 | 6.206e-1 | 65   | 60   | 94.9387    | 78.0970  | AAL94246.1  unknown                                                      |                         |    |   |   |   |   |  |
|         |                        |                      |          |          | 44   | 79   | 46.9048    | 79.0000  |                                                                          |                         |    |   |   |   |   |  |
| FN0034  | -0.732                 | 9.168                | 1.017e-1 | 8.763e-2 | 27   | 14   | 39.4361    | 18.2226  | AAL94247.1  unknown                                                      |                         |    |   |   |   |   |  |
|         |                        |                      |          |          | 21   | 19   | 22.3864    | 19.0000  |                                                                          |                         |    |   |   |   |   |  |
| FN0038  |                        |                      |          |          | 77   |      | 112.4659   |          | AAL94251.1  unknown                                                      |                         |    |   |   |   |   |  |
|         |                        |                      |          |          |      |      |            |          |                                                                          |                         |    |   |   |   |   |  |
| FN0039  | 0.489                  | 7.593                |          |          |      | 13   |            | 16.9210  | AAL94252.1  DNA primase (bacterial type) and small primase-like proteins |                         |    |   |   |   |   |  |
|         |                        |                      |          |          | 11   | 16   | 11.7262    | 16.0000  |                                                                          |                         |    |   |   |   |   |  |
| FN0040  | 0.402                  | 18.632               | 2.871e-2 | 8.462e-3 | 341  | 549  | 498.0631   | 714.5875 | AAL94253.1  Asparaginyl-tRNA synthetase                                  |                         |    |   |   |   |   |  |
|         |                        |                      |          |          | 573  | 751  | 610.8290   | 751.0000 |                                                                          |                         |    |   |   |   |   |  |
| FN0041  |                        |                      |          |          |      |      |            |          | AAL94254.1  unknown                                                      |                         |    |   |   |   |   |  |
|         |                        |                      |          |          | 7    |      | 7.4621     |          |                                                                          |                         |    |   |   |   |   |  |
| FN0043  |                        |                      |          |          |      |      |            |          | AAL94256.1  Hypothetical exported 24-amino acid repeat protein           |                         |    |   |   |   |   |  |
|         |                        |                      |          |          | 8    |      | 8.5282     |          |                                                                          |                         |    |   |   |   |   |  |
| FN0045  |                        |                      |          |          |      |      |            |          | AAL94258.1  Shikimate 5-dehydrogenase                                    |                         |    |   |   |   |   |  |
|         |                        |                      |          |          |      | 7    |            | 7.0000   |                                                                          |                         |    |   |   |   |   |  |
| FN0046  |                        |                      |          |          | 5    |      | 7.3030     |          | AAL94259.1  3-dehydroquinate dehydratase                                 |                         |    |   |   |   |   |  |
|         |                        |                      |          |          |      |      |            |          |                                                                          |                         |    |   |   |   |   |  |
| FN0047  | 0.064                  | 11.902               | 3.588e-1 | 7.305e-1 | 50   | 48   | 73.0298    | 62.4776  | AAL94260.1  Exodeoxyribonuclease III                                     |                         |    |   |   |   |   |  |
|         |                        |                      |          |          | 45   | 64   | 47.9709    | 64.0000  |                                                                          |                         |    |   |   |   |   |  |
| FN0048  | 0.902                  | 8.370                | 7.266e-3 | 1.077e-3 | 8    | 19   | 11.6848    | 24.7307  | AAL94261.1  4-nitrophenylphosphatase                                     |                         |    |   |   |   |   |  |
|         |                        |                      |          |          | 14   | 25   | 14.9243    | 25.0000  |                                                                          |                         |    |   |   |   |   |  |
| FN0049  | 1.366                  | 10.425               | 1.414e-2 | 2.841e-3 | 9    | 40   | 13.1454    | 52.0647  | AAL94262.1  Hypothetical protein                                         |                         |    |   |   |   |   |  |
|         |                        |                      |          |          | 31   | 67   | 33.0466    | 67.0000  |                                                                          |                         |    |   |   |   |   |  |
| FN0050  | -0.820                 | 16.299               | 8.04e-2  | 5.463e-2 | 194  | 151  | 283.3555   | 196.5441 | AAL94263.1  Fumarate reductase flavoprotein subunit                      |                         |    |   |   |   |   |  |
|         |                        |                      |          |          | 442  | 231  | 471.1805   | 231.0000 |                                                                          |                         |    |   |   |   |   |  |
| FN0052  |                        |                      |          |          | 12   |      | 17.5271    |          | AAL94265.1  Arsenate reductase                                           |                         |    |   |   |   |   |  |
|         |                        |                      |          |          |      |      |            |          |                                                                          |                         |    |   |   |   |   |  |
| FN0054  | 0.352                  | 14.314               | 1.918e-1 | 2.926e-1 | 54   | 124  | 78.8722    | 161.4005 | AAL94267.1  Tyrosyl-tRNA synthetase                                      |                         |    |   |   |   |   |  |
|         |                        |                      |          |          | 163  | 161  | 173.7611   | 161.0000 |                                                                          |                         |    |   |   |   |   |  |
| FN0058  | 0.454                  | 15.651               | 2.212e-1 | 3.627e-1 | 153  | 116  | 223.4711   | 150.9875 | AAL94271.1  Cysteine desulphydrase                                       |                         |    |   |   |   |   |  |
|         |                        |                      |          |          | 154  | 380  | 164.1670   | 380.0000 |                                                                          |                         |    |   |   |   |   |  |

Show detected proteins only  
 Show all proteins  
 Filter by category:

Proteins found: 1313

Test Cutoff

| Signif      | Direction | Applies To |
|-------------|-----------|------------|
| red         | yes       | +          |
| yellow      | no        | n/a        |
| green       | yes       | -          |
| pink        | yes       | +          |
| light green | yes       | -          |

Applies To: ratios, bars; ratios, bars; p-, q-Values

Fn Summary Table FnPg vs Fn FnSg vs Fn FnPgSg vs Fn FnPgSg vs FnPg FnSg vs FnPg FnPgSg vs FnSg Fn Coverage

| Protein | FnSg vs FnPg           |                      |          |          | Raw  |      | Normalized |          | Description                                                                      | Log <sub>2</sub> Ratios |    |    |   |   |   |   |
|---------|------------------------|----------------------|----------|----------|------|------|------------|----------|----------------------------------------------------------------------------------|-------------------------|----|----|---|---|---|---|
|         | Log <sub>2</sub> Ratio | Log <sub>2</sub> Sum | q-Value  | p-Value  | FnPg | FnSg | FnPg       | FnSg     |                                                                                  | -6                      | -4 | -2 | 0 | 2 | 4 | 6 |
| FN0059  | 0.914                  | 10.203               | 1.057e-1 | 9.419e-2 | 16   | 24   | 23.3695    | 31.2388  | AAL94272.1  NifU protein                                                         |                         |    |    |   |   |   |   |
|         |                        |                      |          |          | 25   | 63   | 26.6505    | 63.0000  |                                                                                  |                         |    |    |   |   |   |   |
| FN0060  | -0.596                 | 6.211                |          |          | 5    |      | 7.3030     |          | AAL94273.1  D-alanyl-D-alanine carboxypeptidase                                  |                         |    |    |   |   |   |   |
|         |                        |                      |          |          | 13   | 7    | 13.8583    | 7.0000   |                                                                                  |                         |    |    |   |   |   |   |
| FN0061  | -0.086                 | 12.974               | 4.062e-1 | 8.929e-1 | 20   | 60   | 29.2119    | 78.0970  | AAL94274.1  Thermostable carboxypeptidase 1                                      |                         |    |    |   |   |   |   |
|         |                        |                      |          |          | 146  | 96   | 155.6388   | 96.0000  |                                                                                  |                         |    |    |   |   |   |   |
| FN0062  |                        |                      |          |          |      |      |            |          | AAL94275.1  Hypothetical cytosolic protein                                       |                         |    |    |   |   |   |   |
|         |                        |                      |          |          | 6    |      | 6.3961     |          |                                                                                  |                         |    |    |   |   |   |   |
| FN0063  |                        |                      |          |          |      |      |            |          | AAL94276.1  unknown                                                              |                         |    |    |   |   |   |   |
|         |                        |                      |          |          |      | 24   |            | 24.0000  |                                                                                  |                         |    |    |   |   |   |   |
| FN0065  | 0.372                  | 12.985               | 1.016e-1 | 8.749e-2 | 50   | 66   | 73.0298    | 85.9067  | AAL94278.1  Transcription accessory protein (S1 RNA binding domain)              |                         |    |    |   |   |   |   |
|         |                        |                      |          |          | 80   | 119  | 85.2815    | 119.0000 |                                                                                  |                         |    |    |   |   |   |   |
| FN0066  |                        |                      |          |          |      |      |            |          | AAL94279.1  Two component system histidine kinase                                |                         |    |    |   |   |   |   |
|         |                        |                      |          |          |      | 5    |            | 5.0000   |                                                                                  |                         |    |    |   |   |   |   |
| FN0067  | -0.288                 | 16.080               | 1.432e-1 | 1.712e-1 | 234  | 180  | 341.7793   | 234.2910 | AAL94280.1  Isoleucyl-tRNA synthetase                                            |                         |    |    |   |   |   |   |
|         |                        |                      |          |          | 225  | 242  | 239.8543   | 242.0000 |                                                                                  |                         |    |    |   |   |   |   |
| FN0069  | -0.392                 | 15.467               | 1.169e-1 | 1.137e-1 | 198  | 161  | 289.1979   | 209.5603 | AAL94282.1  Glycyl-tRNA synthetase alpha chain                                   |                         |    |    |   |   |   |   |
|         |                        |                      |          |          | 186  | 162  | 198.2796   | 162.0000 |                                                                                  |                         |    |    |   |   |   |   |
| FN0070  | 0.368                  | 17.790               | 7.383e-2 | 4.585e-2 | 241  | 432  | 352.0035   | 562.2984 | AAL94283.1  Glycyl-tRNA synthetase beta chain                                    |                         |    |    |   |   |   |   |
|         |                        |                      |          |          | 456  | 519  | 486.1048   | 519.0000 |                                                                                  |                         |    |    |   |   |   |   |
| FN0071  | 0.095                  | 6.280                |          |          |      | 7    |            | 9.1113   | AAL94284.1  GTP cyclohydrolase I                                                 |                         |    |    |   |   |   |   |
|         |                        |                      |          |          | 8    |      | 8.5282     |          |                                                                                  |                         |    |    |   |   |   |   |
| FN0072  | 0.461                  | 13.747               | 1.498e-1 | 1.899e-1 | 42   | 100  | 61.3450    | 130.1617 | AAL94285.1  2-amino-4-hydroxy-6-hydroxymethylidihydropteridine pyrophosphokinase |                         |    |    |   |   |   |   |
|         |                        |                      |          |          | 130  | 145  | 138.5825   | 145.0000 |                                                                                  |                         |    |    |   |   |   |   |
| FN0073  | 0.174                  | 9.665                | 3.632e-1 | 7.446e-1 | 9    | 15   | 13.1454    | 19.5242  | AAL94286.1  Dihydropteroate synthase                                             |                         |    |    |   |   |   |   |
|         |                        |                      |          |          | 38   | 41   | 40.5087    | 41.0000  |                                                                                  |                         |    |    |   |   |   |   |
| FN0074  | 0.038                  | 8.222                |          |          |      | 10   |            | 13.0162  | AAL94287.1  Ethanolamine utilization protein eutS                                |                         |    |    |   |   |   |   |
|         |                        |                      |          |          | 16   | 22   | 17.0563    | 22.0000  |                                                                                  |                         |    |    |   |   |   |   |
| FN0076  |                        |                      |          |          |      |      |            |          | AAL94289.1  Ethanolamine two-component response regulator                        |                         |    |    |   |   |   |   |
|         |                        |                      |          |          | 4    |      | 4.2641     |          |                                                                                  |                         |    |    |   |   |   |   |
| FN0077  | 2.023                  | 5.378                |          |          |      |      |            |          | AAL94290.1  Ethanolamine two-component sensor kinase                             |                         |    |    |   |   |   |   |
|         |                        |                      |          |          | 3    | 13   | 3.1981     | 13.0000  |                                                                                  |                         |    |    |   |   |   |   |

Show detected proteins only  
 Show all proteins  
 Filter by category:

Proteins found: 1313

Test Cutoff

| Signif | Direction | Applies To   |
|--------|-----------|--------------|
| yes    | +         | ratios, bars |
| no     | n/a       | bars         |
| yes    | -         | ratios, bars |
| yes    | +         | p-, q-Values |
| yes    | -         |              |

Fn Summary Table FnPg vs Fn FnSg vs Fn FnPgSg vs Fn FnPgSg vs FnPg FnSg vs FnPg FnPgSg vs FnSg Fn Coverage

| Protein | FnSg vs FnPg           |                      |          |          | Raw  |      |          |          | Normalized                                                  |    |    |    | Log <sub>2</sub> Ratios |   |   |   |  |  |  |
|---------|------------------------|----------------------|----------|----------|------|------|----------|----------|-------------------------------------------------------------|----|----|----|-------------------------|---|---|---|--|--|--|
|         | Log <sub>2</sub> Ratio | Log <sub>2</sub> Sum | q-Value  | p-Value  | FnPg | FnSg | FnPg     | FnSg     | Description                                                 |    |    |    |                         |   |   |   |  |  |  |
|         |                        |                      |          |          |      |      |          |          |                                                             | -6 | -4 | -2 | 0                       | 2 | 4 | 6 |  |  |  |
| FN0078  | -0.445                 | 9.457                | 4.438e-2 | 1.819e-2 | 19   | 18   | 27.7513  | 23.4291  | AAL94291.1  Ethanolamine utilization protein eutA           |    |    |    |                         |   |   |   |  |  |  |
|         |                        |                      |          |          | 32   | 22   | 34.1126  | 22.0000  |                                                             |    |    |    |                         |   |   |   |  |  |  |
| FN0079  | 0.165                  | 15.228               | 3.665e-1 | 7.552e-1 | 49   | 169  | 71.5692  | 219.9732 | AAL94292.1  Ethanolamine ammonia-lyase heavy chain          |    |    |    |                         |   |   |   |  |  |  |
|         |                        |                      |          |          | 280  | 195  | 298.4854 | 195.0000 |                                                             |    |    |    |                         |   |   |   |  |  |  |
| FN0080  | -0.723                 | 14.987               | 3.075e-3 | 2.684e-4 | 163  | 118  | 238.0771 | 153.5908 | AAL94293.1  Ethanolamine ammonia-lyase light chain          |    |    |    |                         |   |   |   |  |  |  |
|         |                        |                      |          |          | 211  | 127  | 224.9301 | 127.0000 |                                                             |    |    |    |                         |   |   |   |  |  |  |
| FN0081  | 0.308                  | 15.898               | 2.664e-1 | 4.741e-1 | 80   | 172  | 116.8476 | 223.8780 | AAL94294.1  Ethanolamine utilization protein eutL           |    |    |    |                         |   |   |   |  |  |  |
|         |                        |                      |          |          | 307  | 326  | 327.2679 | 326.0000 |                                                             |    |    |    |                         |   |   |   |  |  |  |
| FN0082  | 0.287                  | 10.285               |          |          |      | 20   |          | 26.0323  | AAL94295.1  Ethanolamine utilization protein eutM           |    |    |    |                         |   |   |   |  |  |  |
|         |                        |                      |          |          | 30   | 52   | 31.9806  | 52.0000  |                                                             |    |    |    |                         |   |   |   |  |  |  |
| FN0083  | -0.436                 | 16.359               | 2.349e-1 | 3.977e-1 | 126  | 164  | 184.0350 | 213.4651 | AAL94296.1  Ethanolamine utilization protein eutM precursor |    |    |    |                         |   |   |   |  |  |  |
|         |                        |                      |          |          | 460  | 285  | 490.3689 | 285.0000 |                                                             |    |    |    |                         |   |   |   |  |  |  |
| FN0084  | -0.329                 | 10.846               | 8.358e-2 | 5.918e-2 | 33   | 25   | 48.1997  | 32.5404  | AAL94297.1  Acetaldehyde dehydrogenase (acetylating)        |    |    |    |                         |   |   |   |  |  |  |
|         |                        |                      |          |          | 45   | 44   | 47.9709  | 44.0000  |                                                             |    |    |    |                         |   |   |   |  |  |  |
| FN0086  |                        |                      |          |          | 7    |      |          | 10.2242  | AAL94299.1  Hypothetical protein                            |    |    |    |                         |   |   |   |  |  |  |
|         |                        |                      |          |          |      |      |          |          |                                                             |    |    |    |                         |   |   |   |  |  |  |
| FN0087  | -1.925                 | 6.569                |          |          | 13   |      |          | 18.9877  | AAL94300.1  Ethanolamine utilization protein eutN           |    |    |    |                         |   |   |   |  |  |  |
|         |                        |                      |          |          |      | 5    |          | 5.0000   |                                                             |    |    |    |                         |   |   |   |  |  |  |
| FN0088  |                        |                      |          |          |      |      |          |          | AAL94301.1  Hypothetical protein                            |    |    |    |                         |   |   |   |  |  |  |
|         |                        |                      |          |          |      | 9    |          | 9.0000   |                                                             |    |    |    |                         |   |   |   |  |  |  |
| FN0090  | -0.576                 | 6.001                | 1.706e-1 | 2.397e-1 | 9    | 7    | 13.1454  | 9.1113   | AAL94303.1  Ethanolamine utilization protein eutQ           |    |    |    |                         |   |   |   |  |  |  |
|         |                        |                      |          |          | 6    | 4    | 6.3961   | 4.0000   |                                                             |    |    |    |                         |   |   |   |  |  |  |
| FN0091  |                        |                      |          |          | 6    |      |          | 8.7636   | AAL94304.1  Phosphoserine phosphatase                       |    |    |    |                         |   |   |   |  |  |  |
|         |                        |                      |          |          |      |      |          |          |                                                             |    |    |    |                         |   |   |   |  |  |  |
| FN0092  | 0.338                  | 11.695               | 2.975e-1 | 5.529e-1 | 11   | 48   | 16.0666  | 62.4776  | AAL94305.1  NADPH-dependent butanol dehydrogenase           |    |    |    |                         |   |   |   |  |  |  |
|         |                        |                      |          |          | 81   | 67   | 86.3476  | 67.0000  |                                                             |    |    |    |                         |   |   |   |  |  |  |
| FN0093  | -1.072                 | 14.361               | 1.411e-3 | 6.286e-5 | 153  | 83   | 223.4711 | 108.0342 | AAL94306.1  Thioredoxin                                     |    |    |    |                         |   |   |   |  |  |  |
|         |                        |                      |          |          | 185  | 92   | 197.2136 | 92.0000  |                                                             |    |    |    |                         |   |   |   |  |  |  |
| FN0100  | -0.214                 | 7.693                | 1.124e-1 | 1.056e-1 | 11   | 9    | 16.0666  | 11.7145  | AAL94309.1  Flavodoxins/hemoproteins                        |    |    |    |                         |   |   |   |  |  |  |
|         |                        |                      |          |          | 14   | 15   | 14.9243  | 15.0000  |                                                             |    |    |    |                         |   |   |   |  |  |  |
| FN0106  | -0.403                 | 14.014               | 2.89e-2  | 8.559e-3 | 93   | 82   | 135.8354 | 106.7326 | AAL94315.1  Hypothetical protein                            |    |    |    |                         |   |   |   |  |  |  |
|         |                        |                      |          |          | 150  | 117  | 159.9029 | 117.0000 |                                                             |    |    |    |                         |   |   |   |  |  |  |

Show detected proteins only  
 Show all proteins  
 Filter by category:

Proteins found: 1313

Test Cutoff

| Signif | Direction | Applies To   |
|--------|-----------|--------------|
| yes    | +         | ratios, bars |
| no     | n/a       | bars         |
| yes    | -         | ratios, bars |
| yes    | +         | p-, q-Values |
| yes    | -         |              |

Fn Summary Table FnPg vs Fn FnSg vs Fn FnPgSg vs Fn FnPgSg vs FnPg FnSg vs FnPg FnPgSg vs FnSg Fn Coverage

| Protein | FnSg vs FnPg           |                      |          |          | Raw  |      | Normalized |           | Description                                               | Log <sub>2</sub> Ratios |    |    |   |   |   |   |
|---------|------------------------|----------------------|----------|----------|------|------|------------|-----------|-----------------------------------------------------------|-------------------------|----|----|---|---|---|---|
|         | Log <sub>2</sub> Ratio | Log <sub>2</sub> Sum | q-Value  | p-Value  | FnPg | FnSg | FnPg       | FnSg      |                                                           |                         |    |    |   |   |   |   |
|         |                        |                      |          |          |      |      |            |           |                                                           | -6                      | -4 | -2 | 0 | 2 | 4 | 6 |
| FN0108  | -0.124                 | 9.619                | 2.944e-1 | 5.448e-1 | 16   | 19   | 23.3695    | 24.7307   | AAL94317.1  Microcin C7 self-immunity protein mccF        |                         |    |    |   |   |   |   |
|         |                        |                      |          |          | 33   | 29   | 35.1786    | 29.0000   |                                                           |                         |    |    |   |   |   |   |
| FN0110  | -0.357                 | 17.720               | 1.514e-1 | 1.94e-1  | 442  | 303  | 645.5832   | 394.3898  | AAL94319.1  Seryl-tRNA synthetase                         |                         |    |    |   |   |   |   |
|         |                        |                      |          |          | 381  | 427  | 406.1533   | 427.0000  |                                                           |                         |    |    |   |   |   |   |
| FN0111  |                        |                      |          |          |      |      |            |           | AAL94320.1  unknown                                       |                         |    |    |   |   |   |   |
|         |                        |                      |          |          | 5    |      | 5.3301     |           |                                                           |                         |    |    |   |   |   |   |
| FN0113  | 1.001                  | 13.526               | 1.855e-3 | 1.012e-4 | 46   | 114  | 67.1874    | 148.3843  | AAL94322.1  Heat-inducible transcription repressor hrcA   |                         |    |    |   |   |   |   |
|         |                        |                      |          |          | 81   | 159  | 86.3476    | 159.0000  |                                                           |                         |    |    |   |   |   |   |
| FN0114  | 0.123                  | 13.893               | 3.326e-1 | 6.506e-1 | 83   | 71   | 121.2294   | 92.4148   | AAL94323.1  GrpE protein                                  |                         |    |    |   |   |   |   |
|         |                        |                      |          |          | 108  | 165  | 115.1301   | 165.0000  |                                                           |                         |    |    |   |   |   |   |
| FN0116  | 0.517                  | 21.255               | 1.923e-1 | 2.94e-1  | 604  | 902  | 882.1997   | 1174.0581 | AAL94325.1  Chaperone protein dnaK                        |                         |    |    |   |   |   |   |
|         |                        |                      |          |          | 1653 | 2611 | 1762.1299  | 2611.0000 |                                                           |                         |    |    |   |   |   |   |
| FN0117  | 0.593                  | 8.392                |          |          |      | 10   |            | 13.0162   | AAL94326.1  O6-methylguanine-DNA methyltransferase        |                         |    |    |   |   |   |   |
|         |                        |                      |          |          | 14   | 32   | 14.9243    | 32.0000   |                                                           |                         |    |    |   |   |   |   |
| FN0118  | 0.540                  | 11.886               | 3.846e-2 | 1.406e-2 | 29   | 51   | 42.3573    | 66.3824   | AAL94327.1  Chaperone protein dnaJ                        |                         |    |    |   |   |   |   |
|         |                        |                      |          |          | 56   | 82   | 59.6971    | 82.0000   |                                                           |                         |    |    |   |   |   |   |
| FN0119  | 0.245                  | 11.539               |          |          |      | 29   |            | 37.7469   | AAL94328.1  Flavodoxin                                    |                         |    |    |   |   |   |   |
|         |                        |                      |          |          | 47   | 81   | 50.1029    | 81.0000   |                                                           |                         |    |    |   |   |   |   |
| FN0123  | 0.474                  | 5.303                |          |          |      | 6    |            | 7.8097    | AAL94332.1  ATPase                                        |                         |    |    |   |   |   |   |
|         |                        |                      |          |          | 5    | 7    | 5.3301     | 7.0000    |                                                           |                         |    |    |   |   |   |   |
| FN0127  | 0.209                  | 5.302                |          |          | 4    | 5    | 5.8424     | 6.5081    | AAL94333.1  Fe-S oxidoreductase                           |                         |    |    |   |   |   |   |
|         |                        |                      |          |          |      | 7    |            | 7.0000    |                                                           |                         |    |    |   |   |   |   |
| FN0128  | -0.006                 | 8.274                | 4.311e-1 | 9.893e-1 | 11   | 7    | 16.0666    | 9.1113    | AAL94334.1  Spermidine/putrescine-binding protein         |                         |    |    |   |   |   |   |
|         |                        |                      |          |          | 18   | 26   | 19.1883    | 26.0000   |                                                           |                         |    |    |   |   |   |   |
| FN0130  | 1.094                  | 7.279                |          |          |      | 8    |            | 10.4129   | AAL94336.1  ABC transporter ATP-binding protein           |                         |    |    |   |   |   |   |
|         |                        |                      |          |          | 8    | 26   | 8.5282     | 26.0000   |                                                           |                         |    |    |   |   |   |   |
| FN0132  | -0.105                 | 5.275                |          |          | 3    |      | 4.3818     |           | AAL93916.1  Hemolysin                                     |                         |    |    |   |   |   |   |
|         |                        |                      |          |          | 8    | 6    | 8.5282     | 6.0000    |                                                           |                         |    |    |   |   |   |   |
| FN0147  | 0.313                  | 9.694                | 1.912e-1 | 2.911e-1 | 12   | 27   | 17.5271    | 35.1436   | AAL94353.1  PLSX protein                                  |                         |    |    |   |   |   |   |
|         |                        |                      |          |          | 32   | 29   | 34.1126    | 29.0000   |                                                           |                         |    |    |   |   |   |   |
| FN0148  | -0.026                 | 16.008               | 4.133e-1 | 9.196e-1 | 159  | 248  | 232.2347   | 322.8009  | AAL94354.1  3-oxoacyl-[acyl-carrier-protein] synthase III |                         |    |    |   |   |   |   |
|         |                        |                      |          |          | 268  | 186  | 285.6932   | 186.0000  |                                                           |                         |    |    |   |   |   |   |

Show detected proteins only  
 Show all proteins  
 Filter by category:

Proteins found: 1313

Test Cutoff

| Signif | Direction | Applies To   |
|--------|-----------|--------------|
| yes    | +         | ratios, bars |
| no     | n/a       | bars         |
| yes    | -         | ratios, bars |
| yes    | +         | p-, q-Values |
| yes    | -         |              |

Fn Summary Table FnPg vs Fn FnSg vs Fn FnPgSg vs Fn FnPgSg vs FnPg FnSg vs FnPg FnPgSg vs FnSg Fn Coverage

| Protein       | FnSg vs FnPg           |                      |          |          | Raw      |      |          |          | Normalized                                                    |                                                             |    |    | Log <sub>2</sub> Ratios |   |   |   |
|---------------|------------------------|----------------------|----------|----------|----------|------|----------|----------|---------------------------------------------------------------|-------------------------------------------------------------|----|----|-------------------------|---|---|---|
|               | Log <sub>2</sub> Ratio | Log <sub>2</sub> Sum | q-Value  | p-Value  | FnPg     | FnSg | FnPg     | FnSg     | Description                                                   | -6                                                          | -4 | -2 | 0                       | 2 | 4 | 6 |
|               | <b>FN0149</b>          | -1.021               | 14.867   | 7.968e-2 | 5.358e-2 | 219  | 115      | 319.8704 | 149.6859                                                      | AAL94355.1  Malonyl-CoA-[acyl-carrier-protein] transacylase |    |    |                         |   |   |   |
|               |                        |                      |          |          | 162      | 93   | 172.6951 | 93.0000  |                                                               |                                                             |    |    |                         |   |   |   |
| <b>FN0150</b> | -0.325                 | 10.769               | 6.703e-2 | 3.818e-2 | 29       | 32   | 42.3573  | 41.6517  | AAL94356.1  Acyl carrier protein                              |                                                             |    |    |                         |   |   |   |
|               |                        |                      |          |          | 48       | 33   | 51.1689  | 33.0000  |                                                               |                                                             |    |    |                         |   |   |   |
| <b>FN0151</b> | 0.132                  | 18.786               | 3.797e-1 | 7.991e-1 | 205      | 389  | 299.4221 | 506.3288 | AAL94357.1  3-oxoacyl-[acyl-carrier-protein] synthase         |                                                             |    |    |                         |   |   |   |
|               |                        |                      |          |          | 924      | 901  | 985.0018 | 901.0000 |                                                               |                                                             |    |    |                         |   |   |   |
| <b>FN0152</b> | -0.092                 | 6.092                |          |          |          |      |          |          | AAL94358.1  Ribonuclease III                                  |                                                             |    |    |                         |   |   |   |
|               |                        |                      |          |          | 8        | 8    | 8.5282   | 8.0000   |                                                               |                                                             |    |    |                         |   |   |   |
| <b>FN0153</b> |                        |                      |          |          |          |      |          |          | AAL94359.1  Oxygen-independent coproporphyrinogen III oxidase |                                                             |    |    |                         |   |   |   |
|               |                        |                      |          |          |          |      |          | 13       | 13.0000                                                       |                                                             |    |    |                         |   |   |   |
| <b>FN0155</b> |                        |                      |          |          |          |      |          |          | AAL94361.1  Hypothetical protein                              |                                                             |    |    |                         |   |   |   |
|               |                        |                      |          |          |          |      |          | 5        | 5.0000                                                        |                                                             |    |    |                         |   |   |   |
| <b>FN0156</b> | 0.301                  | 7.335                | 3.425e-1 | 6.801e-1 | 4        | 4    | 5.8424   | 5.2065   | AAL94362.1  Phosphopantetheine adenylyltransferase            |                                                             |    |    |                         |   |   |   |
|               |                        |                      |          |          | 16       | 23   | 17.0563  | 23.0000  |                                                               |                                                             |    |    |                         |   |   |   |
| <b>FN0157</b> |                        |                      |          |          |          |      |          |          | AAL94363.1  DNA repair protein RadA                           |                                                             |    |    |                         |   |   |   |
|               |                        |                      |          |          |          |      |          | 6        | 7.8097                                                        |                                                             |    |    |                         |   |   |   |
|               |                        |                      |          |          |          |      |          | 7        | 7.0000                                                        |                                                             |    |    |                         |   |   |   |
| <b>FN0158</b> | 1.153                  | 10.013               | 6.506e-3 | 8.764e-4 | 12       | 36   | 17.5271  | 46.8582  | AAL94364.1  DNA-binding protein                               |                                                             |    |    |                         |   |   |   |
|               |                        |                      |          |          | 24       | 49   | 25.5845  | 49.0000  |                                                               |                                                             |    |    |                         |   |   |   |
| <b>FN0161</b> |                        |                      |          |          |          |      |          |          | AAL94367.1  RNA-directed DNA polymerase                       |                                                             |    |    |                         |   |   |   |
|               |                        |                      |          |          |          |      |          | 3        | 3.0000                                                        |                                                             |    |    |                         |   |   |   |
| <b>FN0164</b> | 0.530                  | 15.804               | 1.25e-1  | 1.294e-1 | 155      | 278  | 226.3923 | 361.8494 | AAL94370.1  Anhydro-N-acetylmuramyl-tripeptide amidase        |                                                             |    |    |                         |   |   |   |
|               |                        |                      |          |          | 161      | 213  | 171.6291 | 213.0000 |                                                               |                                                             |    |    |                         |   |   |   |
| <b>FN0170</b> | 0.594                  | 14.620               | 9.347e-2 | 7.553e-2 | 63       | 179  | 92.0175  | 232.9894 | AAL94376.1  GTP-binding protein                               |                                                             |    |    |                         |   |   |   |
|               |                        |                      |          |          | 156      | 157  | 166.2990 | 157.0000 |                                                               |                                                             |    |    |                         |   |   |   |
| <b>FN0173</b> | 0.796                  | 11.007               | 1.436e-1 | 1.723e-1 | 7        | 55   | 10.2242  | 71.5889  | AAL94379.1  Hypothetical protein                              |                                                             |    |    |                         |   |   |   |
|               |                        |                      |          |          | 55       | 48   | 58.6311  | 48.0000  |                                                               |                                                             |    |    |                         |   |   |   |
| <b>FN0174</b> | 0.030                  | 12.799               | 1.465e-1 | 1.801e-1 | 56       | 65   | 81.7933  | 84.6051  | AAL94380.1  Enoyl-[acyl-carrier-protein] reductase            |                                                             |    |    |                         |   |   |   |
|               |                        |                      |          |          | 80       | 86   | 85.2815  | 86.0000  |                                                               |                                                             |    |    |                         |   |   |   |
| <b>FN0175</b> | 1.054                  | 9.211                | 6.296e-3 | 8.271e-4 | 10       | 27   | 14.6060  | 35.1436  | AAL94381.1  Cell division inhibitor MinC                      |                                                             |    |    |                         |   |   |   |
|               |                        |                      |          |          | 18       | 35   | 19.1883  | 35.0000  |                                                               |                                                             |    |    |                         |   |   |   |
| <b>FN0176</b> | 0.638                  | 16.129               | 3.194e-3 | 2.913e-4 | 134      | 272  | 195.7198 | 354.0397 | AAL94382.1  Cell division inhibitor MinD                      |                                                             |    |    |                         |   |   |   |
|               |                        |                      |          |          | 219      | 314  | 233.4582 | 314.0000 |                                                               |                                                             |    |    |                         |   |   |   |

Show detected proteins only  
 Show all proteins  
 Filter by category:

Proteins found: 1313

Test Cutoff

| Signif | Direction | Applies To   |
|--------|-----------|--------------|
| yes    | +         | ratios, bars |
| no     | n/a       | bars         |
| yes    | -         | ratios, bars |
| yes    | +         | p-, q-Values |
| yes    | -         | p-, q-Values |

Fn Summary Table FnPg vs Fn FnSg vs Fn FnPgSg vs Fn FnPgSg vs FnPg FnSg vs FnPg FnPgSg vs FnSg Fn Coverage

| Protein       | FnSg vs FnPg           |                      |          |          | Raw  |      | Normalized |          | Description                                                                 | Log <sub>2</sub> Ratios |    |    |   |   |   |   |
|---------------|------------------------|----------------------|----------|----------|------|------|------------|----------|-----------------------------------------------------------------------------|-------------------------|----|----|---|---|---|---|
|               | Log <sub>2</sub> Ratio | Log <sub>2</sub> Sum | q-Value  | p-Value  | FnPg | FnSg | FnPg       | FnSg     |                                                                             |                         |    |    |   |   |   |   |
|               |                        |                      |          |          |      |      |            |          |                                                                             | -6                      | -4 | -2 | 0 | 2 | 4 | 6 |
| <b>FN0177</b> |                        |                      |          |          | 3    |      | 4.3818     |          | AAL94383.1  Cell division inhibitor MinE                                    |                         |    |    |   |   |   |   |
| <b>FN0178</b> | -0.296                 | 10.637               | 1.257e-1 | 1.31e-1  | 35   | 30   | 51.1208    | 39.0485  | AAL94384.1  UNC-44 ankyrins                                                 |                         |    |    |   |   |   |   |
|               |                        |                      |          |          | 35   | 33   | 37.3107    | 33.0000  |                                                                             |                         |    |    |   |   |   |   |
| <b>FN0179</b> | -1.460                 | 11.266               | 1.493e-1 | 1.882e-1 | 93   | 16   | 135.8354   | 20.8259  | AAL94385.1  Ankyrin repeat proteins                                         |                         |    |    |   |   |   |   |
|               |                        |                      |          |          | 27   | 39   | 28.7825    | 39.0000  |                                                                             |                         |    |    |   |   |   |   |
| <b>FN0180</b> |                        |                      |          |          |      |      |            | 5.2065   | AAL94386.1  Tetratricopeptide repeat family protein                         |                         |    |    |   |   |   |   |
|               |                        |                      |          |          |      |      |            | 6.0000   |                                                                             |                         |    |    |   |   |   |   |
| <b>FN0181</b> | 0.168                  | 10.072               | 3.454e-1 | 6.89e-1  | 11   | 25   | 16.0666    | 32.5404  | AAL94387.1  Hypothetical protein                                            |                         |    |    |   |   |   |   |
|               |                        |                      |          |          | 43   | 37   | 45.8388    | 37.0000  |                                                                             |                         |    |    |   |   |   |   |
| <b>FN0182</b> | 1.358                  | 17.164               | 6.972e-2 | 4.109e-2 | 35   | 474  | 51.1208    | 616.9663 | AAL94388.1  Sarcosine oxidase alpha subunit                                 |                         |    |    |   |   |   |   |
|               |                        |                      |          |          | 401  | 610  | 427.4737   | 610.0000 |                                                                             |                         |    |    |   |   |   |   |
| <b>FN0183</b> | 0.853                  | 16.220               | 1.397e-1 | 1.623e-1 | 34   | 274  | 49.6602    | 356.6429 | AAL94389.1  Glycerol-3-phosphate dehydrogenase                              |                         |    |    |   |   |   |   |
|               |                        |                      |          |          | 339  | 386  | 361.3805   | 386.0000 |                                                                             |                         |    |    |   |   |   |   |
| <b>FN0185</b> | 0.274                  | 8.408                | 8.045e-3 | 1.272e-3 | 12   | 15   | 17.5271    | 19.5242  | AAL94391.1  Hypothetical protein                                            |                         |    |    |   |   |   |   |
|               |                        |                      |          |          | 15   | 21   | 15.9903    | 21.0000  |                                                                             |                         |    |    |   |   |   |   |
| <b>FN0189</b> | -0.627                 | 8.202                |          |          |      | 12   |            | 15.6194  | AAL94395.1  Two-component response regulator yesN                           |                         |    |    |   |   |   |   |
|               |                        |                      |          |          | 20   | 12   | 21.3204    | 12.0000  |                                                                             |                         |    |    |   |   |   |   |
| <b>FN0190</b> | 0.175                  | 5.336                | 3.371e-1 | 6.64e-1  | 6    | 5    | 8.7636     | 6.5081   | AAL94396.1  Two-component sensor kinase yesM                                |                         |    |    |   |   |   |   |
|               |                        |                      |          |          | 3    | 7    | 3.1981     | 7.0000   |                                                                             |                         |    |    |   |   |   |   |
| <b>FN0191</b> | 0.470                  | 10.009               | 1.254e-1 | 1.304e-1 | 14   | 35   | 20.4483    | 45.5566  | AAL94397.1  helix-turn-helix DNA-binding protein                            |                         |    |    |   |   |   |   |
|               |                        |                      |          |          | 32   | 30   | 34.1126    | 30.0000  |                                                                             |                         |    |    |   |   |   |   |
| <b>FN0192</b> | 0.331                  | 8.516                |          |          |      | 13   |            | 16.9210  | AAL94398.1  Dipeptide-binding protein                                       |                         |    |    |   |   |   |   |
|               |                        |                      |          |          | 16   | 26   | 17.0563    | 26.0000  |                                                                             |                         |    |    |   |   |   |   |
| <b>FN0197</b> |                        |                      |          |          |      |      |            | 5.0000   | AAL94403.1  Methyltransferase                                               |                         |    |    |   |   |   |   |
| <b>FN0199</b> | 0.187                  | 12.073               | 9.129e-2 | 7.165e-2 | 39   | 50   | 56.9632    | 65.0808  | AAL94405.1  Hypothetical protein                                            |                         |    |    |   |   |   |   |
|               |                        |                      |          |          | 62   | 75   | 66.0932    | 75.0000  |                                                                             |                         |    |    |   |   |   |   |
| <b>FN0200</b> | -0.797                 | 18.638               | 2.076e-1 | 3.302e-1 | 942  | 385  | 1375.8810  | 501.1224 | AAL94406.1  Biotin carboxyl carrier protein of glutaconyl-CoA decarboxylase |                         |    |    |   |   |   |   |
|               |                        |                      |          |          | 289  | 468  | 308.0796   | 468.0000 |                                                                             |                         |    |    |   |   |   |   |
| <b>FN0202</b> | -0.376                 | 19.031               | 1.858e-2 | 4.165e-3 | 585  | 454  | 854.4484   | 590.9339 | AAL94408.1  Glutaconate CoA-transferase subunit A                           |                         |    |    |   |   |   |   |
|               |                        |                      |          |          | 763  | 694  | 813.3727   | 694.0000 |                                                                             |                         |    |    |   |   |   |   |

Show detected proteins only  
 Show all proteins  
 Filter by category:

Proteins found: 1313

Enter (or paste) list of ORFs

Find ORFs

Test Cutoff

q-Value p-Value

.005

| Signif | Direction | Applies To   |
|--------|-----------|--------------|
| yes    | +         | ratios, bars |
| no     | n/a       | bars         |
| yes    | -         | ratios, bars |
| yes    | +         | p-, q-Values |
| yes    | -         | p-, q-Values |

Dot Plots Dot Plots

Fn Summary Table FnPg vs Fn FnSg vs Fn FnPgSg vs Fn FnPgSg vs FnPg FnSg vs FnPg FnPgSg vs FnSg Fn Coverage

| Protein | FnSg vs FnPg           |                      |          |          | Raw  |      |           |           | Normalized |                                                     |      |      | Description | Log <sub>2</sub> Ratios |    |    |   |   |   |   |
|---------|------------------------|----------------------|----------|----------|------|------|-----------|-----------|------------|-----------------------------------------------------|------|------|-------------|-------------------------|----|----|---|---|---|---|
|         | Log <sub>2</sub> Ratio | Log <sub>2</sub> Sum | q-Value  | p-Value  | FnPg | FnSg | FnPg      | FnSg      | FnPg       | FnSg                                                | FnPg | FnSg |             |                         |    |    |   |   |   |   |
|         |                        |                      |          |          |      |      |           |           |            |                                                     |      |      |             | -6                      | -4 | -2 | 0 | 2 | 4 | 6 |
| FN0203  | -0.666                 | 20.747               | 6.635e-2 | 3.747e-2 | 1361 | 730  | 1987.8705 | 950.1801  | AAL94409.1 | Glutaconate CoA-transferase subunit B               |      |      |             |                         |    |    |   |   |   |   |
|         |                        |                      |          |          | 1270 | 1156 | 1353.8445 | 1156.0000 |            |                                                     |      |      |             |                         |    |    |   |   |   |   |
| FN0204  | 0.181                  | 21.199               | 1.987e-1 | 3.098e-1 | 833  | 1129 | 1216.6760 | 1469.5251 | AAL94410.1 | Glutaconyl-CoA decarboxylase A subunit              |      |      |             |                         |    |    |   |   |   |   |
|         |                        |                      |          |          | 1593 | 1835 | 1698.1687 | 1835.0000 |            |                                                     |      |      |             |                         |    |    |   |   |   |   |
| FN0206  | -0.719                 | 11.587               | 1.542e-1 | 2.005e-1 | 69   | 38   | 100.7811  | 49.4614   | AAL94412.1 | Activator of (R)-2-hydroxyglutaryl-CoA dehydratase  |      |      |             |                         |    |    |   |   |   |   |
|         |                        |                      |          |          | 39   | 37   | 41.5748   | 37.0000   |            |                                                     |      |      |             |                         |    |    |   |   |   |   |
| FN0207  | -0.238                 | 18.659               | 2.657e-1 | 4.725e-1 | 632  | 444  | 923.0963  | 577.9178  | AAL94413.1 | (R)-2-hydroxyglutaryl-CoA dehydratase alpha-subunit |      |      |             |                         |    |    |   |   |   |   |
|         |                        |                      |          |          | 445  | 607  | 474.3786  | 607.0000  |            |                                                     |      |      |             |                         |    |    |   |   |   |   |
| FN0208  | -0.277                 | 17.287               | 5.334e-2 | 2.581e-2 | 280  | 254  | 408.9667  | 330.6106  | AAL94414.1 | (R)-2-hydroxyglutaryl-CoA dehydratase beta-subunit  |      |      |             |                         |    |    |   |   |   |   |
|         |                        |                      |          |          | 442  | 396  | 471.1805  | 396.0000  |            |                                                     |      |      |             |                         |    |    |   |   |   |   |
| FN0209  | -0.218                 | 17.566               | 1.837e-1 | 2.717e-1 | 339  | 248  | 495.1419  | 322.8009  | AAL94415.1 | Hypothetical cytosolic protein                      |      |      |             |                         |    |    |   |   |   |   |
|         |                        |                      |          |          | 427  | 494  | 455.1902  | 494.0000  |            |                                                     |      |      |             |                         |    |    |   |   |   |   |
| FN0212  | -0.484                 | 8.841                | 1.657e-1 | 2.279e-1 | 23   | 14   | 33.5937   | 18.2226   | AAL94418.1 | Hypothetical protein                                |      |      |             |                         |    |    |   |   |   |   |
|         |                        |                      |          |          | 16   | 18   | 17.0563   | 18.0000   |            |                                                     |      |      |             |                         |    |    |   |   |   |   |
| FN0214  |                        |                      |          |          | 3    |      | 4.3818    |           | AAL94420.1 | Crossover junction endodeoxyribonuclease ruvC       |      |      |             |                         |    |    |   |   |   |   |
|         |                        |                      |          |          |      |      |           |           |            |                                                     |      |      |             |                         |    |    |   |   |   |   |
| FN0218  | -1.480                 | 13.829               | 4.689e-2 | 2.01e-2  | 173  | 48   | 252.6830  | 62.4776   | AAL94424.1 | Anthranilate synthase component II                  |      |      |             |                         |    |    |   |   |   |   |
|         |                        |                      |          |          | 141  | 82   | 150.3087  | 82.0000   |            |                                                     |      |      |             |                         |    |    |   |   |   |   |
| FN0219  | 1.130                  | 6.485                |          |          |      |      |           |           | AAL94425.1 | Autolysin response regulator                        |      |      |             |                         |    |    |   |   |   |   |
|         |                        |                      |          |          | 6    | 14   | 6.3961    | 14.0000   |            |                                                     |      |      |             |                         |    |    |   |   |   |   |
| FN0221  | -0.801                 | 11.066               | 1.214e-2 | 2.271e-3 | 45   | 27   | 65.7268   | 35.1436   | AAL94427.1 | Carbon starvation protein A                         |      |      |             |                         |    |    |   |   |   |   |
|         |                        |                      |          |          | 53   | 35   | 56.4990   | 35.0000   |            |                                                     |      |      |             |                         |    |    |   |   |   |   |
| FN0224  | -0.500                 | 7.766                | 1.859e-1 | 2.773e-1 | 16   | 6    | 23.3695   | 7.8097    | AAL94430.1 | Excinuclease ABC subunit B                          |      |      |             |                         |    |    |   |   |   |   |
|         |                        |                      |          |          | 11   | 17   | 11.7262   | 17.0000   |            |                                                     |      |      |             |                         |    |    |   |   |   |   |
| FN0225  | -0.507                 | 3.677                |          |          |      |      |           |           | AAL94431.1 | Gluconate permease                                  |      |      |             |                         |    |    |   |   |   |   |
|         |                        |                      |          |          | 4    | 3    | 4.2641    | 3.0000    |            |                                                     |      |      |             |                         |    |    |   |   |   |   |
| FN0226  | -0.776                 | 11.303               | 3.264e-3 | 3.059e-4 | 47   | 26   | 68.6480   | 33.8420   | AAL94432.1 | Pyridoxal phosphate biosynthetic protein pdxA       |      |      |             |                         |    |    |   |   |   |   |
|         |                        |                      |          |          | 59   | 43   | 62.8951   | 43.0000   |            |                                                     |      |      |             |                         |    |    |   |   |   |   |
| FN0227  | 0.230                  | 4.414                |          |          |      |      |           |           | AAL94433.1 | Hypothetical protein                                |      |      |             |                         |    |    |   |   |   |   |
|         |                        |                      |          |          | 4    | 5    | 4.2641    | 5.0000    |            |                                                     |      |      |             |                         |    |    |   |   |   |   |
| FN0233  | -0.557                 | 11.929               | 1.174e-1 | 1.145e-1 | 65   | 43   | 94.9387   | 55.9695   | AAL94439.1 | Hypothetical protein                                |      |      |             |                         |    |    |   |   |   |   |
|         |                        |                      |          |          | 53   | 47   | 56.4990   | 47.0000   |            |                                                     |      |      |             |                         |    |    |   |   |   |   |

Show detected proteins only  
 Show all proteins  
 Filter by category:

Proteins found: 1313

Test Cutoff

| Signif | Direction | Applies To   |
|--------|-----------|--------------|
| yes    | +         | ratios, bars |
| no     | n/a       | bars         |
| yes    | -         | ratios, bars |
| yes    | +         | p-, q-Values |
| yes    | -         | p-, q-Values |



Fn Summary Table FnPg vs Fn FnSg vs Fn FnPgSg vs Fn FnPgSg vs FnPg FnSg vs FnPg FnPgSg vs FnSg Fn Coverage

| Protein | FnSg vs FnPg           |                      |          |          | Raw  |      | Normalized |          | Description                                           | Log <sub>2</sub> Ratios |    |    |   |   |   |   |
|---------|------------------------|----------------------|----------|----------|------|------|------------|----------|-------------------------------------------------------|-------------------------|----|----|---|---|---|---|
|         | Log <sub>2</sub> Ratio | Log <sub>2</sub> Sum | q-Value  | p-Value  | FnPg | FnSg | FnPg       | FnSg     |                                                       |                         |    |    |   |   |   |   |
|         |                        |                      |          |          |      |      |            |          |                                                       | -6                      | -4 | -2 | 0 | 2 | 4 | 6 |
| FN0234  | 0.272                  | 7.375                |          |          |      | 11   |            | 14.3178  | AAL94440.1  unknown                                   |                         |    |    |   |   |   |   |
|         |                        |                      |          |          | 11   | 14   | 11.7262    | 14.0000  |                                                       |                         |    |    |   |   |   |   |
| FN0235  |                        |                      |          |          | 16   |      | 23.3695    |          | AAL94441.1  ABC transporter ATP-binding protein       |                         |    |    |   |   |   |   |
|         |                        |                      |          |          |      |      |            |          |                                                       |                         |    |    |   |   |   |   |
| FN0236  | -1.954                 | 15.340               | 1.515e-1 | 1.943e-1 | 486  | 76   | 709.8494   | 98.9229  | AAL94442.1  ABC transporter substrate-binding protein |                         |    |    |   |   |   |   |
|         |                        |                      |          |          | 86   | 108  | 91.6777    | 108.0000 |                                                       |                         |    |    |   |   |   |   |
| FN0237  |                        |                      |          |          | 3    |      | 4.3818     |          | AAL94443.1  ABC transporter permease protein          |                         |    |    |   |   |   |   |
|         |                        |                      |          |          |      |      |            |          |                                                       |                         |    |    |   |   |   |   |
| FN0238  | -0.897                 | 10.134               | 8.445e-2 | 6.049e-2 | 40   | 17   | 58.4238    | 22.1275  | AAL94444.1  Hypothetical protein                      |                         |    |    |   |   |   |   |
|         |                        |                      |          |          | 31   | 27   | 33.0466    | 27.0000  |                                                       |                         |    |    |   |   |   |   |
| FN0240  | -0.719                 | 12.523               | 2.403e-2 | 6.248e-3 | 64   | 55   | 93.4781    | 71.5889  | AAL94446.1  Thymidylate synthase                      |                         |    |    |   |   |   |   |
|         |                        |                      |          |          | 97   | 48   | 103.4039   | 48.0000  |                                                       |                         |    |    |   |   |   |   |
| FN0241  | 0.229                  | 9.879                | 2.275e-1 | 3.785e-1 | 14   | 28   | 20.4483    | 36.4453  | AAL94447.1  Dihydrofolate reductase                   |                         |    |    |   |   |   |   |
|         |                        |                      |          |          | 34   | 30   | 36.2447    | 30.0000  |                                                       |                         |    |    |   |   |   |   |
| FN0242  | 0.947                  | 13.131               |          |          |      | 116  |            | 150.9875 | AAL94448.1  Trk system potassium uptake protein trkA  |                         |    |    |   |   |   |   |
|         |                        |                      |          |          | 64   | 112  | 68.2252    | 112.0000 |                                                       |                         |    |    |   |   |   |   |
| FN0243  | 0.276                  | 9.862                |          |          |      | 17   |            | 22.1275  | AAL94449.1  Poly(A) polymerase                        |                         |    |    |   |   |   |   |
|         |                        |                      |          |          | 26   | 45   | 27.7165    | 45.0000  |                                                       |                         |    |    |   |   |   |   |
| FN0244  | -0.449                 | 6.379                |          |          |      | 6    |            | 7.8097   | AAL94450.1  COP associated protein                    |                         |    |    |   |   |   |   |
|         |                        |                      |          |          | 10   |      | 10.6602    |          |                                                       |                         |    |    |   |   |   |   |
| FN0245  | 0.592                  | 6.777                |          |          |      | 9    |            | 11.7145  | AAL94451.1  Copper-exporting ATPase                   |                         |    |    |   |   |   |   |
|         |                        |                      |          |          | 8    | 14   | 8.5282     | 14.0000  |                                                       |                         |    |    |   |   |   |   |
| FN0247  | 0.819                  | 14.365               | 8.486e-2 | 6.112e-2 | 41   | 149  | 59.8844    | 193.9409 | AAL94453.1  Hypothetical cytosolic protein            |                         |    |    |   |   |   |   |
|         |                        |                      |          |          | 149  | 192  | 158.8369   | 192.0000 |                                                       |                         |    |    |   |   |   |   |
| FN0248  | 0.180                  | 11.149               |          |          |      | 28   |            | 36.4453  | AAL94454.1  Hypothetical Exported Protein             |                         |    |    |   |   |   |   |
|         |                        |                      |          |          | 42   | 65   | 44.7728    | 65.0000  |                                                       |                         |    |    |   |   |   |   |
| FN0249  | -0.190                 | 12.637               | 3.647e-1 | 7.496e-1 | 89   | 81   | 129.9930   | 105.4309 | AAL94455.1  unknown                                   |                         |    |    |   |   |   |   |
|         |                        |                      |          |          | 38   | 44   | 40.5087    | 44.0000  |                                                       |                         |    |    |   |   |   |   |
| FN0250  | -0.406                 | 12.967               | 2.74e-1  | 4.926e-1 | 106  | 81   | 154.8231   | 105.4309 | AAL94456.1  unknown                                   |                         |    |    |   |   |   |   |
|         |                        |                      |          |          | 48   | 50   | 51.1689    | 50.0000  |                                                       |                         |    |    |   |   |   |   |
| FN0251  | -2.135                 | 13.336               | 1.251e-1 | 1.297e-1 | 240  | 40   | 350.5429   | 52.0647  | AAL94457.1  Hypothetical membrane-spanning Protein    |                         |    |    |   |   |   |   |
|         |                        |                      |          |          | 71   | 45   | 75.6874    | 45.0000  |                                                       |                         |    |    |   |   |   |   |

Show detected proteins only  
 Show all proteins  
 Filter by category:

Proteins found: 1313

Enter (or paste) list of ORFs

Find ORFs

Test Cutoff

q-Value

p-Value

.005

| Signif      | Direction | Applies To |
|-------------|-----------|------------|
| red         | yes       | +          |
| yellow      | no        | n/a        |
| green       | yes       | -          |
| pink        | yes       | +          |
| light green | yes       | -          |

Applies To: ratios, bars; ratios, bars; p-, q-Values

Dot Plots

Fn Summary Table FnPg vs Fn FnSg vs Fn FnPgSg vs Fn FnPgSg vs FnPg FnSg vs FnPg FnPgSg vs FnSg Fn Coverage

| Protein | FnSg vs FnPg           |                      |          |          | Raw  |      |           |           | Normalized |      |      |      | Description | Log <sub>2</sub> Ratios |    |    |   |   |   |   |  |
|---------|------------------------|----------------------|----------|----------|------|------|-----------|-----------|------------|------|------|------|-------------|-------------------------|----|----|---|---|---|---|--|
|         | Log <sub>2</sub> Ratio | Log <sub>2</sub> Sum | q-Value  | p-Value  | FnPg | FnSg | FnPg      | FnSg      | FnPg       | FnSg | FnPg | FnSg |             | -6                      | -4 | -2 | 0 | 2 | 4 | 6 |  |
| FN0252  | -0.525                 | 18.648               | 1.974e-1 | 3.071e-1 | 753  | 430  | 1099.8284 | 559.6951  |            |      |      |      |             |                         |    |    |   |   |   |   |  |
|         |                        |                      |          |          | 411  | 509  | 438.1339  | 509.0000  |            |      |      |      |             |                         |    |    |   |   |   |   |  |
| FN0253  | 0.792                  | 16.177               |          |          |      | 180  |           | 234.2910  |            |      |      |      |             |                         |    |    |   |   |   |   |  |
|         |                        |                      |          |          | 194  | 482  | 206.8077  | 482.0000  |            |      |      |      |             |                         |    |    |   |   |   |   |  |
| FN0254  | -0.171                 | 18.364               | 2.091e-1 | 3.337e-1 | 352  | 444  | 514.1296  | 577.9178  |            |      |      |      |             |                         |    |    |   |   |   |   |  |
|         |                        |                      |          |          | 674  | 517  | 718.4970  | 517.0000  |            |      |      |      |             |                         |    |    |   |   |   |   |  |
| FN0258  | -0.115                 | 5.730                |          |          | 6    |      | 8.7636    |           |            |      |      |      |             |                         |    |    |   |   |   |   |  |
|         |                        |                      |          |          | 6    | 7    | 6.3961    | 7.0000    |            |      |      |      |             |                         |    |    |   |   |   |   |  |
| FN0261  | -0.588                 | 7.675                |          |          | 12   | 11   | 17.5271   | 14.3178   |            |      |      |      |             |                         |    |    |   |   |   |   |  |
|         |                        |                      |          |          |      | 9    |           | 9.0000    |            |      |      |      |             |                         |    |    |   |   |   |   |  |
| FN0262  | -0.511                 | 20.865               | 2.411e-1 | 4.134e-1 | 1745 | 878  | 2548.7391 | 1142.8193 |            |      |      |      |             |                         |    |    |   |   |   |   |  |
|         |                        |                      |          |          | 704  | 1173 | 750.4776  | 1173.0000 |            |      |      |      |             |                         |    |    |   |   |   |   |  |
| FN0263  | -1.480                 | 15.329               | 1.508e-1 | 1.925e-1 | 386  | 106  | 563.7899  | 137.9714  |            |      |      |      |             |                         |    |    |   |   |   |   |  |
|         |                        |                      |          |          | 107  | 105  | 114.0641  | 105.0000  |            |      |      |      |             |                         |    |    |   |   |   |   |  |
| FN0264  | -0.049                 | 15.420               | 4.096e-1 | 9.058e-1 | 96   | 211  | 140.2172  | 274.6411  |            |      |      |      |             |                         |    |    |   |   |   |   |  |
|         |                        |                      |          |          | 268  | 137  | 285.6932  | 137.0000  |            |      |      |      |             |                         |    |    |   |   |   |   |  |
| FN0265  | -0.455                 | 6.649                |          |          |      | 7    |           | 9.1113    |            |      |      |      |             |                         |    |    |   |   |   |   |  |
|         |                        |                      |          |          | 11   | 8    | 11.7262   | 8.0000    |            |      |      |      |             |                         |    |    |   |   |   |   |  |
| FN0266  |                        |                      |          |          |      |      |           |           |            |      |      |      |             |                         |    |    |   |   |   |   |  |
|         |                        |                      |          |          | 8    |      | 8.5282    |           |            |      |      |      |             |                         |    |    |   |   |   |   |  |
| FN0267  | 0.323                  | 5.677                |          |          |      |      |           |           |            |      |      |      |             |                         |    |    |   |   |   |   |  |
|         |                        |                      |          |          | 6    | 8    | 6.3961    | 8.0000    |            |      |      |      |             |                         |    |    |   |   |   |   |  |
| FN0268  | 0.386                  | 8.398                |          |          | 11   |      | 16.0666   |           |            |      |      |      |             |                         |    |    |   |   |   |   |  |
|         |                        |                      |          |          |      | 21   |           | 21.0000   |            |      |      |      |             |                         |    |    |   |   |   |   |  |
| FN0270  |                        |                      |          |          |      | 4    |           | 5.2065    |            |      |      |      |             |                         |    |    |   |   |   |   |  |
|         |                        |                      |          |          |      | 5    |           | 5.0000    |            |      |      |      |             |                         |    |    |   |   |   |   |  |
| FN0271  | -0.690                 | 7.110                |          |          |      | 5    |           | 6.5081    |            |      |      |      |             |                         |    |    |   |   |   |   |  |
|         |                        |                      |          |          | 14   | 12   | 14.9243   | 12.0000   |            |      |      |      |             |                         |    |    |   |   |   |   |  |
| FN0272  | 1.301                  | 5.486                |          |          |      | 10   |           | 13.0162   |            |      |      |      |             |                         |    |    |   |   |   |   |  |
|         |                        |                      |          |          | 4    | 8    | 4.2641    | 8.0000    |            |      |      |      |             |                         |    |    |   |   |   |   |  |
| FN0273  | -1.074                 | 7.111                |          |          |      | 4    |           | 5.2065    |            |      |      |      |             |                         |    |    |   |   |   |   |  |
|         |                        |                      |          |          | 16   | 11   | 17.0563   | 11.0000   |            |      |      |      |             |                         |    |    |   |   |   |   |  |

Show detected proteins only  
 Show all proteins  
 Filter by category:

Proteins found: 1313

Enter (or paste) list of ORFs

Find ORFs

Test Cutoff

q-Value

p-Value

| Signif | Direction | Applies To   |
|--------|-----------|--------------|
| yes    | +         | ratios, bars |
| no     | n/a       | bars         |
| yes    | -         | ratios, bars |
| yes    | +         | p-, q-Values |
| yes    | -         | p-, q-Values |

Dot Plots  Dot Plots

Fn Summary Table FnPg vs Fn FnSg vs Fn FnPgSg vs Fn FnPgSg vs FnPg FnSg vs FnPg FnPgSg vs FnSg Fn Coverage

| Protein | FnSg vs FnPg           |                      |          |          | Raw  |      | Normalized |          | Description                                                | Log <sub>2</sub> Ratios |    |    |   |   |   |   |
|---------|------------------------|----------------------|----------|----------|------|------|------------|----------|------------------------------------------------------------|-------------------------|----|----|---|---|---|---|
|         | Log <sub>2</sub> Ratio | Log <sub>2</sub> Sum | q-Value  | p-Value  | FnPg | FnSg | FnPg       | FnSg     |                                                            | -6                      | -4 | -2 | 0 | 2 | 4 | 6 |
| FN0276  | 0.609                  | 11.134               |          |          |      | 50   |            | 65.0808  | AAL94482.1  Sodium-dependent phosphate transporter         |                         |    |    |   |   |   |   |
|         |                        |                      |          |          | 36   | 52   | 38.3767    | 52.0000  |                                                            |                         |    |    |   |   |   |   |
| FN0277  | -0.190                 | 7.083                | 2.604e-1 | 4.596e-1 | 9    | 6    | 13.1454    | 7.8097   | AAL94483.1  Hypothetical protein                           |                         |    |    |   |   |   |   |
|         |                        |                      |          |          | 11   | 14   | 11.7262    | 14.0000  |                                                            |                         |    |    |   |   |   |   |
| FN0278  | -0.464                 | 15.828               | 2.93e-2  | 8.761e-3 | 209  | 158  | 305.2645   | 205.6554 | AAL94484.1  Xaa-His dipeptidase                            |                         |    |    |   |   |   |   |
|         |                        |                      |          |          | 245  | 205  | 261.1747   | 205.0000 |                                                            |                         |    |    |   |   |   |   |
| FN0279  | 0.615                  | 14.873               | 1.932e-1 | 2.964e-1 | 26   | 175  | 37.9755    | 227.7829 | AAL94485.1  Lipoprotein                                    |                         |    |    |   |   |   |   |
|         |                        |                      |          |          | 227  | 201  | 241.9864   | 201.0000 |                                                            |                         |    |    |   |   |   |   |
| FN0280  | 0.199                  | 12.759               | 3.492e-1 | 7.006e-1 | 21   | 71   | 30.6725    | 92.4148  | AAL94486.1  Hypothetical protein                           |                         |    |    |   |   |   |   |
|         |                        |                      |          |          | 117  | 86   | 124.7243   | 86.0000  |                                                            |                         |    |    |   |   |   |   |
| FN0281  | 1.332                  | 12.939               | 2.707e-2 | 7.662e-3 | 21   | 87   | 30.6725    | 113.2406 | AAL94487.1  DNA polymerase III alpha subunit               |                         |    |    |   |   |   |   |
|         |                        |                      |          |          | 76   | 168  | 81.0175    | 168.0000 |                                                            |                         |    |    |   |   |   |   |
| FN0282  | 0.154                  | 11.290               | 2.31e-1  | 3.874e-1 | 27   | 45   | 39.4361    | 58.5727  | AAL94488.1  Hypothetical protein                           |                         |    |    |   |   |   |   |
|         |                        |                      |          |          | 52   | 47   | 55.4330    | 47.0000  |                                                            |                         |    |    |   |   |   |   |
| FN0283  | -0.244                 | 6.584                |          |          |      |      |            |          | AAL94489.1  tRNA (Guanine-N1) - methyltransferase          |                         |    |    |   |   |   |   |
|         |                        |                      |          |          | 10   | 9    | 10.6602    | 9.0000   |                                                            |                         |    |    |   |   |   |   |
| FN0284  | -0.125                 | 11.460               |          |          |      |      |            |          | AAL94490.1  16S rRNA processing protein rimM               |                         |    |    |   |   |   |   |
|         |                        |                      |          |          | 52   | 60   | 55.4330    | 60.0000  |                                                            |                         |    |    |   |   |   |   |
| FN0285  |                        |                      |          |          |      |      |            |          | AAL94491.1  RNA binding protein                            |                         |    |    |   |   |   |   |
|         |                        |                      |          |          | 27   |      |            | 28.7825  |                                                            |                         |    |    |   |   |   |   |
| FN0287  | -0.507                 | 7.079                |          |          |      |      |            |          | AAL94493.1  Dimethyladenosine transferase                  |                         |    |    |   |   |   |   |
|         |                        |                      |          |          | 13   | 13   | 13.8583    | 13.0000  |                                                            |                         |    |    |   |   |   |   |
| FN0288  | -0.132                 | 11.731               | 3.674e-1 | 7.582e-1 | 23   | 41   | 33.5937    | 53.3663  | AAL94494.1  Hypoxanthine-guanine phosphoribosyltransferase |                         |    |    |   |   |   |   |
|         |                        |                      |          |          | 83   | 58   | 88.4796    | 58.0000  |                                                            |                         |    |    |   |   |   |   |
| FN0291  | -1.092                 | 5.736                |          |          |      |      |            |          | AAL94497.1  Hemolysin                                      |                         |    |    |   |   |   |   |
|         |                        |                      |          |          | 10   | 5    | 10.6602    | 5.0000   |                                                            |                         |    |    |   |   |   |   |
| FN0294  | -1.095                 | 13.579               | 4.651e-2 | 1.98e-2  | 136  | 71   | 198.6410   | 92.4148  | AAL94500.1  Transketolase subunit A                        |                         |    |    |   |   |   |   |
|         |                        |                      |          |          | 117  | 59   | 124.7243   | 59.0000  |                                                            |                         |    |    |   |   |   |   |
| FN0295  | -0.929                 | 14.223               | 9.08e-2  | 7.081e-2 | 170  | 71   | 248.3012   | 92.4148  | AAL94501.1  Transketolase                                  |                         |    |    |   |   |   |   |
|         |                        |                      |          |          | 125  | 108  | 133.2524   | 108.0000 |                                                            |                         |    |    |   |   |   |   |
| FN0296  | -0.120                 | 11.682               | 3.291e-1 | 6.404e-1 | 30   | 43   | 43.8179    | 55.9695  | AAL94502.1  Hypothetical cytosolic protein                 |                         |    |    |   |   |   |   |
|         |                        |                      |          |          | 71   | 54   | 75.6874    | 54.0000  |                                                            |                         |    |    |   |   |   |   |

Show detected proteins only  
 Show all proteins  
 Filter by category:

Proteins found: 1313

Enter (or paste) list of ORFs

Find ORFs

Test Cutoff

q-Value p-Value

.005

| Signif | Direction | Applies To   |
|--------|-----------|--------------|
| yes    | +         | ratios, bars |
| no     | n/a       | bars         |
| yes    | -         | ratios, bars |
| yes    | +         | p-, q-Values |
| yes    | -         | p-, q-Values |

Dot Plots Dot Plots

Fn Summary Table FnPg vs Fn FnSg vs Fn FnPgSg vs Fn FnPgSg vs FnPg FnSg vs FnPg FnPgSg vs FnSg Fn Coverage

| Protein | FnSg vs FnPg           |                      |          |          | Raw  |      | Normalized |           | Description                                                            | Log <sub>2</sub> Ratios |    |    |   |   |   |   |
|---------|------------------------|----------------------|----------|----------|------|------|------------|-----------|------------------------------------------------------------------------|-------------------------|----|----|---|---|---|---|
|         | Log <sub>2</sub> Ratio | Log <sub>2</sub> Sum | q-Value  | p-Value  | FnPg | FnSg | FnPg       | FnSg      |                                                                        |                         |    |    |   |   |   |   |
|         |                        |                      |          |          |      |      |            |           |                                                                        | -6                      | -4 | -2 | 0 | 2 | 4 | 6 |
| FN0297  | 0.890                  | 8.674                | 8.369e-2 | 5.936e-2 | 5    | 20   | 7.3030     | 26.0323   | AAL94503.1  ATPase associated with chromosome architecture/replication |                         |    |    |   |   |   |   |
|         |                        |                      |          |          | 21   | 29   | 22.3864    | 29.0000   |                                                                        |                         |    |    |   |   |   |   |
| FN0298  | 0.068                  | 16.301               | 4.025e-1 | 8.796e-1 | 94   | 225  | 137.2960   | 292.8637  | AAL94504.1  Histidyl-tRNA synthetase                                   |                         |    |    |   |   |   |   |
|         |                        |                      |          |          | 392  | 289  | 417.8796   | 289.0000  |                                                                        |                         |    |    |   |   |   |   |
| FN0299  | 0.263                  | 15.873               | 2.449e-1 | 4.227e-1 | 96   | 198  | 140.2172   | 257.7201  | AAL94505.1  Aspartyl-tRNA synthetase                                   |                         |    |    |   |   |   |   |
|         |                        |                      |          |          | 288  | 279  | 307.0136   | 279.0000  |                                                                        |                         |    |    |   |   |   |   |
| FN0308  | 0.763                  | 17.256               | 1.419e-3 | 6.376e-5 | 191  | 417  | 278.9737   | 542.7741  | AAL94514.1  Iron(III)-binding protein                                  |                         |    |    |   |   |   |   |
|         |                        |                      |          |          | 308  | 488  | 328.3339   | 488.0000  |                                                                        |                         |    |    |   |   |   |   |
| FN0310  | -0.860                 | 12.155               | 1.081e-1 | 9.826e-2 | 83   | 44   | 121.2294   | 57.2711   | AAL94516.1  Iron(III)-transport ATP-binding protein sfuC               |                         |    |    |   |   |   |   |
|         |                        |                      |          |          | 57   | 43   | 60.7631    | 43.0000   |                                                                        |                         |    |    |   |   |   |   |
| FN0311  | 1.210                  | 13.477               | 2.582e-2 | 7.09e-3  | 29   | 132  | 42.3573    | 171.8134  | AAL94517.1  Anaerobic ribonucleoside-triphosphate reductase            |                         |    |    |   |   |   |   |
|         |                        |                      |          |          | 92   | 153  | 98.0738    | 153.0000  |                                                                        |                         |    |    |   |   |   |   |
| FN0313  | 0.816                  | 8.615                |          |          |      | 25   |            | 32.5404   | AAL94519.1  16S rRNA m(5)C 967 methyltransferase                       |                         |    |    |   |   |   |   |
|         |                        |                      |          |          | 14   | 20   | 14.9243    | 20.0000   |                                                                        |                         |    |    |   |   |   |   |
| FN0314  | 0.280                  | 6.465                |          |          |      | 9    |            | 11.7145   | AAL94520.1  Caffeoyl-CoA O-methyltransferase                           |                         |    |    |   |   |   |   |
|         |                        |                      |          |          | 8    | 9    | 8.5282     | 9.0000    |                                                                        |                         |    |    |   |   |   |   |
| FN0315  | -0.369                 | 6.459                |          |          |      | 5    |            | 6.5081    | AAL94521.1  Transcriptional regulator, AraC family                     |                         |    |    |   |   |   |   |
|         |                        |                      |          |          | 10   | 10   | 10.6602    | 10.0000   |                                                                        |                         |    |    |   |   |   |   |
| FN0316  | -1.304                 | 7.964                |          |          | 17   | 7    | 24.8301    | 9.1113    | AAL94522.1  Hypothetical protein                                       |                         |    |    |   |   |   |   |
|         |                        |                      |          |          |      | 11   |            | 11.0000   |                                                                        |                         |    |    |   |   |   |   |
| FN0317  | 0.956                  | 9.605                | 7.221e-2 | 4.392e-2 | 7    | 29   | 10.2242    | 37.7469   | AAL94523.1  Tryptophan synthase beta chain                             |                         |    |    |   |   |   |   |
|         |                        |                      |          |          | 28   | 40   | 29.8485    | 40.0000   |                                                                        |                         |    |    |   |   |   |   |
| FN0319  | 0.357                  | 6.156                |          |          |      | 7    |            | 9.1113    | AAL94525.1  Citrate (pro-3S)-lyase ligase                              |                         |    |    |   |   |   |   |
|         |                        |                      |          |          | 7    | 10   | 7.4621     | 10.0000   |                                                                        |                         |    |    |   |   |   |   |
| FN0320  | -1.219                 | 8.306                | 9.754e-3 | 1.653e-3 | 16   | 11   | 23.3695    | 14.3178   | AAL94526.1  Hypothetical cytosolic protein                             |                         |    |    |   |   |   |   |
|         |                        |                      |          |          | 29   | 9    | 30.9146    | 9.0000    |                                                                        |                         |    |    |   |   |   |   |
| FN0321  | 0.621                  | 14.969               | 8.387e-2 | 5.963e-2 | 70   | 140  | 102.2417   | 182.2263  | AAL94527.1  Heat shock protein htpG                                    |                         |    |    |   |   |   |   |
|         |                        |                      |          |          | 175  | 262  | 186.5534   | 262.0000  |                                                                        |                         |    |    |   |   |   |   |
| FN0322  | 0.160                  | 21.915               | 2.94e-1  | 5.436e-1 | 934  | 1816 | 1364.1962  | 2363.7357 | AAL94528.1  Fructose-bisphosphate aldolase                             |                         |    |    |   |   |   |   |
|         |                        |                      |          |          | 2250 | 1839 | 2398.5434  | 1839.0000 |                                                                        |                         |    |    |   |   |   |   |
| FN0325  | -0.132                 | 4.132                |          |          | 3    |      | 4.3818     |           | AAL94529.1  LSU ribosomal protein L20P                                 |                         |    |    |   |   |   |   |
|         |                        |                      |          |          |      | 4    |            | 4.0000    |                                                                        |                         |    |    |   |   |   |   |

Show detected proteins only  
 Show all proteins  
 Filter by category:

Proteins found: 1313

Test Cutoff

| Signif | Direction | Applies To   |
|--------|-----------|--------------|
| yes    | +         | ratios, bars |
| no     | n/a       | bars         |
| yes    | -         | ratios, bars |
| yes    | +         | p-, q-Values |
| yes    | -         |              |

Fn Summary Table FnPg vs Fn FnSg vs Fn FnPgSg vs Fn FnPgSg vs FnPg FnSg vs FnPg FnPgSg vs FnSg Fn Coverage

| Protein | FnSg vs FnPg           |                      |          |          | Raw  |      |           |           | Normalized |      |      |      | Description | Log <sub>2</sub> Ratios |    |    |   |   |   |   |
|---------|------------------------|----------------------|----------|----------|------|------|-----------|-----------|------------|------|------|------|-------------|-------------------------|----|----|---|---|---|---|
|         | Log <sub>2</sub> Ratio | Log <sub>2</sub> Sum | q-Value  | p-Value  | FnPg | FnSg | FnPg      | FnSg      | FnPg       | FnSg | FnPg | FnSg |             | -6                      | -4 | -2 | 0 | 2 | 4 | 6 |
| FN0327  | 0.255                  | 9.487                |          |          |      | 15   |           | 19.5242   |            |      |      |      |             |                         |    |    |   |   |   |   |
|         |                        |                      |          |          | 23   | 39   | 24.5184   | 39.0000   |            |      |      |      |             |                         |    |    |   |   |   |   |
| FN0329  | -0.590                 | 17.490               | 1.37e-1  | 1.557e-1 | 472  | 243  | 689.4011  | 316.2928  |            |      |      |      |             |                         |    |    |   |   |   |   |
|         |                        |                      |          |          | 341  | 383  | 363.5126  | 383.0000  |            |      |      |      |             |                         |    |    |   |   |   |   |
| FN0330  | -0.705                 | 10.639               | 1.334e-1 | 1.474e-1 | 45   | 35   | 65.7268   | 45.5566   |            |      |      |      |             |                         |    |    |   |   |   |   |
|         |                        |                      |          |          | 34   | 17   | 36.2447   | 17.0000   |            |      |      |      |             |                         |    |    |   |   |   |   |
| FN0331  | 0.878                  | 11.193               | 1.185e-1 | 1.166e-1 | 8    | 57   | 11.6848   | 74.1921   |            |      |      |      |             |                         |    |    |   |   |   |   |
|         |                        |                      |          |          | 56   | 57   | 59.6971   | 57.0000   |            |      |      |      |             |                         |    |    |   |   |   |   |
| FN0332  | 0.740                  | 6.539                |          |          |      | 13   |           | 16.9210   |            |      |      |      |             |                         |    |    |   |   |   |   |
|         |                        |                      |          |          | 7    | 8    | 7.4621    | 8.0000    |            |      |      |      |             |                         |    |    |   |   |   |   |
| FN0333  | -0.137                 | 6.047                |          |          |      | 5    |           | 6.5081    |            |      |      |      |             |                         |    |    |   |   |   |   |
|         |                        |                      |          |          | 8    | 9    | 8.5282    | 9.0000    |            |      |      |      |             |                         |    |    |   |   |   |   |
| FN0334  | 0.788                  | 15.023               | 3.433e-2 | 1.159e-2 | 69   | 168  | 100.7811  | 218.6716  |            |      |      |      |             |                         |    |    |   |   |   |   |
|         |                        |                      |          |          | 166  | 261  | 176.9592  | 261.0000  |            |      |      |      |             |                         |    |    |   |   |   |   |
| FN0335  | 1.121                  | 20.996               | 2.564e-2 | 7.002e-3 | 932  | 1798 | 1361.2750 | 2340.3066 |            |      |      |      |             |                         |    |    |   |   |   |   |
|         |                        |                      |          |          | 563  | 1925 | 600.1689  | 1925.0000 |            |      |      |      |             |                         |    |    |   |   |   |   |
| FN0336  | 0.303                  | 10.396               |          |          |      | 35   |           | 45.5566   |            |      |      |      |             |                         |    |    |   |   |   |   |
|         |                        |                      |          |          | 31   | 36   | 33.0466   | 36.0000   |            |      |      |      |             |                         |    |    |   |   |   |   |
| FN0341  | -2.181                 | 8.648                |          |          |      | 6    |           | 7.8097    |            |      |      |      |             |                         |    |    |   |   |   |   |
|         |                        |                      |          |          | 40   | 11   | 42.6408   | 11.0000   |            |      |      |      |             |                         |    |    |   |   |   |   |
| FN0342  | -0.612                 | 10.071               | 1.795e-1 | 2.61e-1  | 38   | 30   | 55.5026   | 39.0485   |            |      |      |      |             |                         |    |    |   |   |   |   |
|         |                        |                      |          |          | 24   | 14   | 25.5845   | 14.0000   |            |      |      |      |             |                         |    |    |   |   |   |   |
| FN0344  |                        |                      |          |          |      |      |           |           |            |      |      |      |             |                         |    |    |   |   |   |   |
|         |                        |                      |          |          |      | 3    |           | 3.0000    |            |      |      |      |             |                         |    |    |   |   |   |   |
| FN0347  | 0.519                  | 11.693               | 1.886e-1 | 2.841e-1 | 14   | 49   | 20.4483   | 63.7792   |            |      |      |      |             |                         |    |    |   |   |   |   |
|         |                        |                      |          |          | 71   | 74   | 75.6874   | 74.0000   |            |      |      |      |             |                         |    |    |   |   |   |   |
| FN0348  | 0.069                  | 15.922               | 3.841e-1 | 8.143e-1 | 120  | 233  | 175.2715  | 303.2767  |            |      |      |      |             |                         |    |    |   |   |   |   |
|         |                        |                      |          |          | 292  | 207  | 311.2776  | 207.0000  |            |      |      |      |             |                         |    |    |   |   |   |   |
| FN0349  | 0.720                  | 9.762                | 9.009e-2 | 6.962e-2 | 11   | 22   | 16.0666   | 28.6356   |            |      |      |      |             |                         |    |    |   |   |   |   |
|         |                        |                      |          |          | 28   | 47   | 29.8485   | 47.0000   |            |      |      |      |             |                         |    |    |   |   |   |   |
| FN0351  | -1.971                 | 11.839               | 1.408e-1 | 1.652e-1 | 140  | 27   | 204.4834  | 35.1436   |            |      |      |      |             |                         |    |    |   |   |   |   |
|         |                        |                      |          |          | 33   | 26   | 35.1786   | 26.0000   |            |      |      |      |             |                         |    |    |   |   |   |   |

Show detected proteins only  
 Show all proteins  
 Filter by category:

Proteins found: 1313

Test Cutoff

| Signif | Direction | Applies To   |
|--------|-----------|--------------|
| yes    | +         | ratios, bars |
| no     | n/a       | bars         |
| yes    | -         | ratios, bars |
| yes    | +         | p-, q-Values |
| yes    | -         | p-, q-Values |

Fn Summary Table FnPg vs Fn FnSg vs Fn FnPgSg vs Fn FnPgSg vs FnPg FnSg vs FnPg FnPgSg vs FnSg Fn Coverage

| Protein | FnSg vs FnPg           |                      |          |          | Raw  |      | Normalized |          | Description                                                 | Log <sub>2</sub> Ratios |    |    |   |   |   |   |
|---------|------------------------|----------------------|----------|----------|------|------|------------|----------|-------------------------------------------------------------|-------------------------|----|----|---|---|---|---|
|         | Log <sub>2</sub> Ratio | Log <sub>2</sub> Sum | q-Value  | p-Value  | FnPg | FnSg | FnPg       | FnSg     |                                                             | -6                      | -4 | -2 | 0 | 2 | 4 | 6 |
| FN0352  | -0.330                 | 11.164               | 2.681e-1 | 4.782e-1 | 21   | 38   | 30.6725    | 49.4614  | AAL94556.1  NA+/H+ antiporter NHAC                          |                         |    |    |   |   |   |   |
|         |                        |                      |          |          | 72   | 36   | 76.7534    | 36.0000  |                                                             |                         |    |    |   |   |   |   |
| FN0355  | 0.172                  | 15.270               | 2.916e-1 | 5.374e-1 | 93   | 189  | 135.8354   | 246.0055 | AAL94558.1  S-adenosylmethionine synthetase                 |                         |    |    |   |   |   |   |
|         |                        |                      |          |          | 224  | 176  | 238.7883   | 176.0000 |                                                             |                         |    |    |   |   |   |   |
| FN0356  | -1.566                 | 7.942                |          |          | 26   | 7    | 37.9755    | 9.1113   | AAL94559.1  Lactoylglutathione lyase                        |                         |    |    |   |   |   |   |
|         |                        |                      |          |          | 15   |      | 15.9903    |          |                                                             |                         |    |    |   |   |   |   |
| FN0357  | -0.124                 | 7.331                | 3.745e-1 | 7.816e-1 | 5    | 11   | 7.3030     | 14.3178  | AAL94560.1  ATP synthase epsilon chain, sodium ion specific |                         |    |    |   |   |   |   |
|         |                        |                      |          |          | 18   | 10   | 19.1883    | 10.0000  |                                                             |                         |    |    |   |   |   |   |
| FN0358  | 0.581                  | 17.192               | 6.231e-2 | 3.35e-2  | 212  | 420  | 309.6462   | 546.6790 | AAL94561.1  ATP synthase beta chain, sodium ion specific    |                         |    |    |   |   |   |   |
|         |                        |                      |          |          | 303  | 400  | 323.0038   | 400.0000 |                                                             |                         |    |    |   |   |   |   |
| FN0359  | 0.365                  | 11.877               | 1.394e-1 | 1.615e-1 | 47   | 57   | 68.6480    | 74.1921  | AAL94562.1  ATP synthase gamma chain, sodium ion specific   |                         |    |    |   |   |   |   |
|         |                        |                      |          |          | 37   | 65   | 39.4427    | 65.0000  |                                                             |                         |    |    |   |   |   |   |
| FN0360  | 0.285                  | 14.476               | 7.053e-2 | 4.199e-2 | 96   | 140  | 140.2172   | 182.2263 | AAL94563.1  ATP synthase alpha chain, sodium ion specific   |                         |    |    |   |   |   |   |
|         |                        |                      |          |          | 125  | 151  | 133.2524   | 151.0000 |                                                             |                         |    |    |   |   |   |   |
| FN0361  | 0.049                  | 9.456                | 4.111e-1 | 9.113e-1 | 24   | 13   | 35.0543    | 16.9210  | AAL94564.1  ATP synthase delta chain, sodium ion specific   |                         |    |    |   |   |   |   |
|         |                        |                      |          |          | 16   | 37   | 17.0563    | 37.0000  |                                                             |                         |    |    |   |   |   |   |
| FN0362  | 0.489                  | 10.582               |          |          |      | 29   |            | 37.7469  | AAL94565.1  ATP synthase B chain, sodium ion specific       |                         |    |    |   |   |   |   |
|         |                        |                      |          |          | 31   | 55   | 33.0466    | 55.0000  |                                                             |                         |    |    |   |   |   |   |
| FN0364  |                        |                      |          |          |      |      |            |          | AAL94567.1  ATP synthase A chain, sodium ion specific       |                         |    |    |   |   |   |   |
|         |                        |                      |          |          | 13   |      | 13.8583    |          |                                                             |                         |    |    |   |   |   |   |
| FN0366  | 0.094                  | 15.463               | 2.964e-1 | 5.5e-1   | 127  | 193  | 185.4956   | 251.2120 | AAL94569.1  Phosphoglucosamine mutase                       |                         |    |    |   |   |   |   |
|         |                        |                      |          |          | 212  | 188  | 225.9961   | 188.0000 |                                                             |                         |    |    |   |   |   |   |
| FN0368  | -0.854                 | 12.891               | 8.103e-2 | 5.551e-2 | 59   | 42   | 86.1751    | 54.6679  | AAL94571.1  Adenylosuccinate lyase                          |                         |    |    |   |   |   |   |
|         |                        |                      |          |          | 139  | 75   | 148.1767   | 75.0000  |                                                             |                         |    |    |   |   |   |   |
| FN0370  | -0.097                 | 9.472                | 3.919e-1 | 8.415e-1 | 10   | 25   | 14.6060    | 32.5404  | AAL94573.1  Signal peptidase I                              |                         |    |    |   |   |   |   |
|         |                        |                      |          |          | 38   | 19   | 40.5087    | 19.0000  |                                                             |                         |    |    |   |   |   |   |
| FN0371  | -1.266                 | 8.366                |          |          | 32   | 9    | 46.7391    | 11.7145  | AAL94574.1  Hypothetical protein                            |                         |    |    |   |   |   |   |
|         |                        |                      |          |          | 9    |      | 9.5942     |          |                                                             |                         |    |    |   |   |   |   |
| FN0374  | 0.957                  | 7.687                |          |          | 9    |      | 13.1454    |          | AAL94577.1  Single-stranded-DNA-specific exonuclease recJ   |                         |    |    |   |   |   |   |
|         |                        |                      |          |          | 7    | 20   | 7.4621     | 20.0000  |                                                             |                         |    |    |   |   |   |   |
| FN0375  | 0.592                  | 18.873               | 3.983e-2 | 1.494e-2 | 353  | 740  | 515.5902   | 963.1963 | AAL94578.1  Iron(III)-binding protein                       |                         |    |    |   |   |   |   |
|         |                        |                      |          |          | 575  | 738  | 612.9611   | 738.0000 |                                                             |                         |    |    |   |   |   |   |

Show detected proteins only  
 Show all proteins  
 Filter by category:

Proteins found: 1313

Test Cutoff

| Signif | Direction | Applies To   |
|--------|-----------|--------------|
| yes    | +         | ratios, bars |
| no     | n/a       | bars         |
| yes    | -         | ratios, bars |
| yes    | +         | p-, q-Values |
| yes    | -         |              |

Fn Summary Table FnPg vs Fn FnSg vs Fn FnPgSg vs Fn FnPgSg vs FnPg FnSg vs FnPg FnPgSg vs FnSg Fn Coverage

| Protein | FnSg vs FnPg           |                      |          |          | Raw  |      |           |           | Normalized                                                     |      |        |                                                               | Description | Log <sub>2</sub> Ratios |    |    |   |   |   |   |
|---------|------------------------|----------------------|----------|----------|------|------|-----------|-----------|----------------------------------------------------------------|------|--------|---------------------------------------------------------------|-------------|-------------------------|----|----|---|---|---|---|
|         | Log <sub>2</sub> Ratio | Log <sub>2</sub> Sum | q-Value  | p-Value  | FnPg | FnSg | FnPg      | FnSg      | FnPg                                                           | FnSg | FnPg   | FnSg                                                          |             |                         |    |    |   |   |   |   |
|         |                        |                      |          |          |      |      |           |           |                                                                |      |        |                                                               |             | -6                      | -4 | -2 | 0 | 2 | 4 | 6 |
| FN0376  | 0.684                  | 14.002               | 6.587e-3 | 8.96e-4  | 61   | 115  | 89.0963   | 149.6859  |                                                                |      |        |                                                               |             |                         |    |    |   |   |   |   |
|         |                        |                      |          |          | 106  | 175  | 112.9980  | 175.0000  | AAL94579.1   Iron(III)-transport ATP-binding protein sfuC      |      |        |                                                               |             |                         |    |    |   |   |   |   |
| FN0377  |                        |                      |          |          |      |      |           |           |                                                                |      |        | AAL94580.1   Iron(III)-transport system permease protein sfuB |             |                         |    |    |   |   |   |   |
|         |                        |                      |          |          |      |      | 5         |           |                                                                |      | 5.0000 |                                                               |             |                         |    |    |   |   |   |   |
| FN0378  |                        |                      |          |          |      |      |           |           |                                                                |      |        | AAL94581.1   UDP-glucose 4-epimerase                          |             |                         |    |    |   |   |   |   |
|         |                        |                      |          |          |      |      | 3         |           |                                                                |      | 3.9048 |                                                               |             |                         |    |    |   |   |   |   |
| FN0379  |                        |                      |          |          |      |      |           |           |                                                                |      |        | AAL94582.1   Hypothetical protein                             |             |                         |    |    |   |   |   |   |
|         | -0.504                 | 5.674                |          |          | 8    |      |           | 11.6848   |                                                                |      |        |                                                               |             |                         |    |    |   |   |   |   |
| FN0380  |                        |                      |          |          |      |      |           |           |                                                                |      |        | AAL94583.1   unknown                                          |             |                         |    |    |   |   |   |   |
|         |                        |                      |          |          |      |      | 6         |           |                                                                |      | 6.3961 |                                                               |             |                         |    |    |   |   |   |   |
| FN0384  | 0.071                  | 4.334                |          |          | 3    | 4    | 4.3818    | 5.2065    | AAL94587.1   Hypothetical protein                              |      |        |                                                               |             |                         |    |    |   |   |   |   |
|         |                        |                      |          |          |      |      | 4         |           |                                                                |      | 4.0000 |                                                               |             |                         |    |    |   |   |   |   |
| FN0385  |                        |                      |          |          |      |      |           |           |                                                                |      |        | AAL94588.1   Hypothetical protein                             |             |                         |    |    |   |   |   |   |
|         |                        |                      |          |          |      |      | 5         |           |                                                                |      | 5.3301 |                                                               |             |                         |    |    |   |   |   |   |
| FN0387  | 0.178                  | 9.358                | 3.829e-1 | 8.102e-1 | 14   | 5    | 20.4483   | 6.5081    | AAL94590.1   Fusobacterium outer membrane protein family       |      |        |                                                               |             |                         |    |    |   |   |   |   |
|         |                        |                      |          |          | 26   | 48   | 27.7165   | 48.0000   |                                                                |      |        |                                                               |             |                         |    |    |   |   |   |   |
| FN0390  | -0.310                 | 12.774               | 2.522e-1 | 4.404e-1 | 40   | 64   | 58.4238   | 83.3035   | AAL94593.1   Hypothetical protein                              |      |        |                                                               |             |                         |    |    |   |   |   |   |
|         |                        |                      |          |          | 120  | 67   | 127.9223  | 67.0000   |                                                                |      |        |                                                               |             |                         |    |    |   |   |   |   |
| FN0391  | -0.025                 | 9.836                | 4.26e-1  | 9.689e-1 | 6    | 23   | 8.7636    | 29.9372   | AAL94594.1   Hydrolase (HAD superfamily)                       |      |        |                                                               |             |                         |    |    |   |   |   |   |
|         |                        |                      |          |          | 49   | 30   | 52.2349   | 30.0000   |                                                                |      |        |                                                               |             |                         |    |    |   |   |   |   |
| FN0392  | -0.021                 | 4.808                |          |          |      | 5    |           | 6.5081    | AAL94595.1   Oxygen-independent coproporphyrinogen III oxidase |      |        |                                                               |             |                         |    |    |   |   |   |   |
|         |                        |                      |          |          | 5    | 4    | 5.3301    | 4.0000    |                                                                |      |        |                                                               |             |                         |    |    |   |   |   |   |
| FN0393  | 0.683                  | 9.213                | 7.93e-2  | 5.305e-2 | 11   | 29   | 16.0666   | 37.7469   | AAL94596.1   Polysaccharide deacetylase                        |      |        |                                                               |             |                         |    |    |   |   |   |   |
|         |                        |                      |          |          | 21   | 24   | 22.3864   | 24.0000   |                                                                |      |        |                                                               |             |                         |    |    |   |   |   |   |
| FN0394  | -1.012                 | 7.388                |          |          | 4    | 7    | 5.8424    | 9.1113    | AAL94597.1   Outer membrane protein                            |      |        |                                                               |             |                         |    |    |   |   |   |   |
|         |                        |                      |          |          | 29   |      | 30.9146   |           |                                                                |      |        |                                                               |             |                         |    |    |   |   |   |   |
| FN0396  | 0.238                  | 24.828               | 1.754e-1 | 2.514e-1 | 3549 | 5397 | 5183.6534 | 7024.8246 | AAL94599.1   Dipeptide-binding protein                         |      |        |                                                               |             |                         |    |    |   |   |   |   |
|         |                        |                      |          |          | 4566 | 4827 | 4867.4440 | 4827.0000 |                                                                |      |        |                                                               |             |                         |    |    |   |   |   |   |
| FN0397  | 0.037                  | 11.074               |          |          |      | 40   |           | 52.0647   | AAL94600.1   Dipeptide transport system permease protein dppB  |      |        |                                                               |             |                         |    |    |   |   |   |   |
|         |                        |                      |          |          | 43   | 42   | 45.8388   | 42.0000   |                                                                |      |        |                                                               |             |                         |    |    |   |   |   |   |
| FN0398  | 0.556                  | 11.070               | 3.375e-2 | 1.123e-2 | 29   | 38   | 42.3573   | 49.4614   | AAL94601.1   Dipeptide transport system permease protein dppC  |      |        |                                                               |             |                         |    |    |   |   |   |   |
|         |                        |                      |          |          | 32   | 63   | 34.1126   | 63.0000   |                                                                |      |        |                                                               |             |                         |    |    |   |   |   |   |

Show detected proteins only  
 Show all proteins  
 Filter by category:

Proteins found:  
 1313

Enter (or paste) list of ORFs

|                                      |                                   |
|--------------------------------------|-----------------------------------|
| <b>Test</b>                          | <b>Cutoff</b>                     |
| <input type="text" value="q-Value"/> | <input type="text" value=".005"/> |
| <input type="text" value="p-Value"/> | <input type="text"/>              |

| Signif | Direction | Applies To   |
|--------|-----------|--------------|
| yes    | +         | ratios, bars |
| no     | n/a       | bars         |
| yes    | -         | ratios, bars |
| yes    | +         | p-, q-Values |
| yes    | -         |              |

Fn Summary Table FnPg vs Fn FnSg vs Fn FnPgSg vs Fn FnPgSg vs FnPg FnSg vs FnPg FnPgSg vs FnSg Fn Coverage

| Protein | FnSg vs FnPg           |                      |          |          | Raw  |      | Normalized |          | Description                                                                  | Log <sub>2</sub> Ratios |    |    |   |   |   |   |
|---------|------------------------|----------------------|----------|----------|------|------|------------|----------|------------------------------------------------------------------------------|-------------------------|----|----|---|---|---|---|
|         | Log <sub>2</sub> Ratio | Log <sub>2</sub> Sum | q-Value  | p-Value  | FnPg | FnSg | FnPg       | FnSg     |                                                                              | -6                      | -4 | -2 | 0 | 2 | 4 | 6 |
| FN0399  | 0.307                  | 15.227               | 1.549e-1 | 2.022e-1 | 98   | 138  | 143.1384   | 179.6231 | AAL94602.1  Dipeptide transport ATP-binding protein dppD                     |                         |    |    |   |   |   |   |
|         |                        |                      |          |          | 196  | 256  | 208.9398   | 256.0000 |                                                                              |                         |    |    |   |   |   |   |
| FN0400  | 0.197                  | 17.503               | 1.169e-1 | 1.136e-1 | 306  | 331  | 446.9422   | 430.8351 | AAL94603.1  Dipeptide transport ATP-binding protein dppF                     |                         |    |    |   |   |   |   |
|         |                        |                      |          |          | 336  | 492  | 358.1825   | 492.0000 |                                                                              |                         |    |    |   |   |   |   |
| FN0405  | -0.009                 | 12.802               | 4.281e-1 | 9.774e-1 | 38   | 58   | 55.5026    | 75.4938  | AAL94608.1  Tryptophanyl-tRNA synthetase                                     |                         |    |    |   |   |   |   |
|         |                        |                      |          |          | 107  | 93   | 114.0641   | 93.0000  |                                                                              |                         |    |    |   |   |   |   |
| FN0406  | -0.352                 | 10.060               | 1.482e-1 | 1.851e-1 | 25   | 16   | 36.5149    | 20.8259  | AAL94609.1  Alanine racemase, biosynthetic                                   |                         |    |    |   |   |   |   |
|         |                        |                      |          |          | 35   | 37   | 37.3107    | 37.0000  |                                                                              |                         |    |    |   |   |   |   |
| FN0407  | 0.367                  | 9.336                |          |          |      | 19   |            | 24.7307  | AAL94610.1  Hypothetical protein                                             |                         |    |    |   |   |   |   |
|         |                        |                      |          |          | 21   | 33   | 22.3864    | 33.0000  |                                                                              |                         |    |    |   |   |   |   |
| FN0408  | 0.618                  | 12.444               | 1.478e-1 | 1.84e-1  | 19   | 76   | 27.7513    | 98.9229  | AAL94611.1  Acetyl-coenzyme A carboxylase carboxyl transferase subunit beta  |                         |    |    |   |   |   |   |
|         |                        |                      |          |          | 87   | 86   | 92.7437    | 86.0000  |                                                                              |                         |    |    |   |   |   |   |
| FN0409  | 0.093                  | 16.272               | 2.99e-1  | 5.569e-1 | 219  | 219  | 319.8704   | 285.0540 | AAL94612.1  Acetyl-coenzyme A carboxylase carboxyl transferase subunit alpha |                         |    |    |   |   |   |   |
|         |                        |                      |          |          | 211  | 296  | 224.9301   | 296.0000 |                                                                              |                         |    |    |   |   |   |   |
| FN0410  | 0.234                  | 13.369               | 4.817e-2 | 2.113e-2 | 62   | 80   | 90.5569    | 104.1293 | AAL94613.1  6-phosphofructokinase                                            |                         |    |    |   |   |   |   |
|         |                        |                      |          |          | 93   | 119  | 99.1398    | 119.0000 |                                                                              |                         |    |    |   |   |   |   |
| FN0411  |                        |                      |          |          |      | 13   |            | 16.9210  | AAL94614.1  putative alpha helix protein                                     |                         |    |    |   |   |   |   |
|         |                        |                      |          |          |      |      |            |          |                                                                              |                         |    |    |   |   |   |   |
| FN0413  |                        |                      |          |          | 8    |      | 11.6848    |          | AAL94616.1  unknown                                                          |                         |    |    |   |   |   |   |
|         |                        |                      |          |          | 3    |      | 3.1981     |          |                                                                              |                         |    |    |   |   |   |   |
| FN0414  |                        |                      |          |          |      |      |            |          | AAL94617.1  ATP-dependent helicase HEPA                                      |                         |    |    |   |   |   |   |
|         |                        |                      |          |          |      | 4    |            | 4.0000   |                                                                              |                         |    |    |   |   |   |   |
| FN0416  |                        |                      |          |          | 9    |      | 13.1454    |          | AAL94619.1  Type III restriction-modification system methylation subunit     |                         |    |    |   |   |   |   |
|         |                        |                      |          |          |      |      |            |          |                                                                              |                         |    |    |   |   |   |   |
| FN0417  | -0.810                 | 7.453                |          |          | 12   |      | 17.5271    |          | AAL94620.1  Type III restriction-modification system restriction subunit     |                         |    |    |   |   |   |   |
|         |                        |                      |          |          |      | 10   |            | 10.0000  |                                                                              |                         |    |    |   |   |   |   |
| FN0418  | 0.413                  | 12.730               |          |          |      | 77   |            | 100.2245 | AAL94621.1  Uracil phosphoribosyltransferase                                 |                         |    |    |   |   |   |   |
|         |                        |                      |          |          | 67   | 90   | 71.4233    | 90.0000  |                                                                              |                         |    |    |   |   |   |   |
| FN0419  | -0.812                 | 7.121                | 3.494e-2 | 1.199e-2 | 9    | 6    | 13.1454    | 7.8097   | AAL94622.1  Aspartate carbamoyltransferase                                   |                         |    |    |   |   |   |   |
|         |                        |                      |          |          | 17   | 10   | 18.1223    | 10.0000  |                                                                              |                         |    |    |   |   |   |   |
| FN0420  | 0.271                  | 10.280               | 3.414e-1 | 6.767e-1 | 6    | 38   | 8.7636     | 49.4614  | AAL94623.1  Dihydroorotase                                                   |                         |    |    |   |   |   |   |
|         |                        |                      |          |          | 52   | 28   | 55.4330    | 28.0000  |                                                                              |                         |    |    |   |   |   |   |

Show detected proteins only  
 Show all proteins  
 Filter by category:

Proteins found: 1313

Test Cutoff

| Signif | Direction | Applies To   |
|--------|-----------|--------------|
| yes    | +         | ratios, bars |
| no     | n/a       | bars         |
| yes    | -         | ratios, bars |
| yes    | +         | p-, q-Values |
| yes    | -         | p-, q-Values |



Fn Summary Table FnPg vs Fn FnSg vs Fn FnPgSg vs Fn FnPgSg vs FnPg FnSg vs FnPg FnPgSg vs FnSg Fn Coverage

| Protein | FnSg vs FnPg           |                      |          |          | Raw  |      |          |          | Normalized                                                         |      |      |      | Description | Log <sub>2</sub> Ratios |    |    |   |   |   |   |
|---------|------------------------|----------------------|----------|----------|------|------|----------|----------|--------------------------------------------------------------------|------|------|------|-------------|-------------------------|----|----|---|---|---|---|
|         | Log <sub>2</sub> Ratio | Log <sub>2</sub> Sum | q-Value  | p-Value  | FnPg | FnSg | FnPg     | FnSg     | FnPg                                                               | FnSg | FnPg | FnSg |             |                         |    |    |   |   |   |   |
|         |                        |                      |          |          |      |      |          |          |                                                                    |      |      |      |             | -6                      | -4 | -2 | 0 | 2 | 4 | 6 |
| FN0421  | -0.441                 | 10.388               |          |          |      | 26   |          | 33.8420  | AAL94624.1  Carbamoyl-phosphate synthase small chain               |      |      |      |             |                         |    |    |   |   |   |   |
|         |                        |                      |          |          | 40   | 29   | 42.6408  | 29.0000  |                                                                    |      |      |      |             |                         |    |    |   |   |   |   |
| FN0422  | 0.866                  | 14.286               | 1.306e-1 | 1.411e-1 | 20   | 158  | 29.2119  | 205.6554 | AAL94625.1  Carbamoyl-phosphate synthase large chain               |      |      |      |             |                         |    |    |   |   |   |   |
|         |                        |                      |          |          | 169  | 176  | 180.1573 | 176.0000 |                                                                    |      |      |      |             |                         |    |    |   |   |   |   |
| FN0423  | 0.781                  | 8.966                |          |          |      | 22   |          | 28.6356  | AAL94626.1  Dihydroorotate dehydrogenase electron transfer subunit |      |      |      |             |                         |    |    |   |   |   |   |
|         |                        |                      |          |          | 16   | 30   | 17.0563  | 30.0000  |                                                                    |      |      |      |             |                         |    |    |   |   |   |   |
| FN0424  | 0.995                  | 7.839                | 8.033e-2 | 5.452e-2 | 3    | 19   | 4.3818   | 24.7307  | AAL94627.1  Dihydroorotate dehydrogenase                           |      |      |      |             |                         |    |    |   |   |   |   |
|         |                        |                      |          |          | 16   | 18   | 17.0563  | 18.0000  |                                                                    |      |      |      |             |                         |    |    |   |   |   |   |
| FN0426  | 0.582                  | 10.924               | 2.025e-1 | 3.186e-1 | 7    | 46   | 10.2242  | 59.8744  | AAL94629.1  Orotidine 5'-phosphate decarboxylase                   |      |      |      |             |                         |    |    |   |   |   |   |
|         |                        |                      |          |          | 58   | 48   | 61.8291  | 48.0000  |                                                                    |      |      |      |             |                         |    |    |   |   |   |   |
| FN0427  | 0.006                  | 11.569               | 4.234e-1 | 9.585e-1 | 41   | 38   | 59.8844  | 49.4614  | AAL94630.1  Orotate phosphoribosyltransferase                      |      |      |      |             |                         |    |    |   |   |   |   |
|         |                        |                      |          |          | 47   | 61   | 50.1029  | 61.0000  |                                                                    |      |      |      |             |                         |    |    |   |   |   |   |
| FN0430  | 0.631                  | 14.454               | 9.84e-2  | 8.267e-2 | 51   | 159  | 74.4904  | 206.9570 | AAL94633.1  LSU ribosomal protein L19P                             |      |      |      |             |                         |    |    |   |   |   |   |
|         |                        |                      |          |          | 156  | 166  | 166.2990 | 166.0000 |                                                                    |      |      |      |             |                         |    |    |   |   |   |   |
| FN0435  | -0.178                 | 11.898               | 3.704e-1 | 7.682e-1 | 17   | 47   | 24.8301  | 61.1760  | AAL94634.1  Purine nucleoside phosphorylase                        |      |      |      |             |                         |    |    |   |   |   |   |
|         |                        |                      |          |          | 100  | 55   | 106.6019 | 55.0000  |                                                                    |      |      |      |             |                         |    |    |   |   |   |   |
| FN0436  | 0.105                  | 12.527               | 3.77e-1  | 7.9e-1   | 35   | 41   | 51.1208  | 53.3663  | AAL94635.1  regulator of kinase autophosphorylation inhibitor      |      |      |      |             |                         |    |    |   |   |   |   |
|         |                        |                      |          |          | 91   | 106  | 97.0078  | 106.0000 |                                                                    |      |      |      |             |                         |    |    |   |   |   |   |
| FN0437  | 0.528                  | 8.125                | 2.155e-1 | 3.488e-1 | 3    | 17   | 4.3818   | 22.1275  | AAL94636.1  kinase autophosphorylation inhibitor KipI              |      |      |      |             |                         |    |    |   |   |   |   |
|         |                        |                      |          |          | 22   | 18   | 23.4524  | 18.0000  |                                                                    |      |      |      |             |                         |    |    |   |   |   |   |
| FN0439  | -0.376                 | 12.182               | 3.377e-1 | 6.657e-1 | 10   | 32   | 14.6060  | 41.6517  | AAL94638.1  Lactam utilization protein LAMB                        |      |      |      |             |                         |    |    |   |   |   |   |
|         |                        |                      |          |          | 132  | 78   | 140.7145 | 78.0000  |                                                                    |      |      |      |             |                         |    |    |   |   |   |   |
| FN0445  |                        |                      |          |          |      |      |          |          | AAL94641.1  Hypothetical protein                                   |      |      |      |             |                         |    |    |   |   |   |   |
|         |                        |                      |          |          |      | 6    |          | 6.0000   |                                                                    |      |      |      |             |                         |    |    |   |   |   |   |
| FN0446  | 1.035                  | 7.493                | 5.234e-2 | 2.483e-2 | 7    | 18   | 10.2242  | 23.4291  | AAL94642.1  Hypothetical protein                                   |      |      |      |             |                         |    |    |   |   |   |   |
|         |                        |                      |          |          | 8    | 15   | 8.5282   | 15.0000  |                                                                    |      |      |      |             |                         |    |    |   |   |   |   |
| FN0447  | 1.424                  | 6.778                |          |          |      | 11   |          | 14.3178  | AAL94643.1  NIFS protein                                           |      |      |      |             |                         |    |    |   |   |   |   |
|         |                        |                      |          |          | 6    | 20   | 6.3961   | 20.0000  |                                                                    |      |      |      |             |                         |    |    |   |   |   |   |
| FN0450  | 0.695                  | 9.234                | 9.329e-2 | 7.519e-2 | 14   | 18   | 20.4483  | 23.4291  | AAL94646.1  ABC transporter ATP-binding protein                    |      |      |      |             |                         |    |    |   |   |   |   |
|         |                        |                      |          |          | 17   | 39   | 18.1223  | 39.0000  |                                                                    |      |      |      |             |                         |    |    |   |   |   |   |
| FN0451  | 0.197                  | 5.996                |          |          |      | 7    |          | 9.1113   | AAL94647.1  Hypothetical protein                                   |      |      |      |             |                         |    |    |   |   |   |   |
|         |                        |                      |          |          | 7    | 8    | 7.4621   | 8.0000   |                                                                    |      |      |      |             |                         |    |    |   |   |   |   |

Show detected proteins only  
 Show all proteins  
 Filter by category:

Proteins found: 1313

Enter (or paste) list of ORFs

Find ORFs

Test Cutoff

q-Value p-Value

.005

| Signif | Direction | Applies To   |
|--------|-----------|--------------|
| yes    | +         | ratios, bars |
| no     | n/a       | bars         |
| yes    | -         | ratios, bars |
| yes    | +         | p-, q-Values |
| yes    | -         | p-, q-Values |

Dot Plots Dot Plots

Fn Summary Table FnPg vs Fn FnSg vs Fn FnPgSg vs Fn FnPgSg vs FnPg FnSg vs FnPg FnPgSg vs FnSg Fn Coverage

| Protein | FnSg vs FnPg           |                      |          |          | Raw  |      |           |           | Normalized                                                                   |  |  |    | Log <sub>2</sub> Ratios |    |   |   |   |   |
|---------|------------------------|----------------------|----------|----------|------|------|-----------|-----------|------------------------------------------------------------------------------|--|--|----|-------------------------|----|---|---|---|---|
|         | Log <sub>2</sub> Ratio | Log <sub>2</sub> Sum | q-Value  | p-Value  | FnPg | FnSg | FnPg      | FnSg      | Description                                                                  |  |  |    |                         |    |   |   |   |   |
|         |                        |                      |          |          |      |      |           |           |                                                                              |  |  | -6 | -4                      | -2 | 0 | 2 | 4 | 6 |
| FN0452  | -1.408                 | 16.823               | 1.636e-1 | 2.228e-1 | 647  | 136  | 945.0053  | 177.0199  | AAL94648.1  Glucosamine--fructose-6-phosphate aminotransferase (isomerizing) |  |  |    |                         |    |   |   |   |   |
|         |                        |                      |          |          | 154  | 241  | 164.1670  | 241.0000  |                                                                              |  |  |    |                         |    |   |   |   |   |
| FN0453  | -0.491                 | 16.982               | 5.095e-2 | 2.353e-2 | 255  | 219  | 372.4518  | 285.0540  | AAL94649.1  Xaa-Pro aminopeptidase                                           |  |  |    |                         |    |   |   |   |   |
|         |                        |                      |          |          | 451  | 322  | 480.7747  | 322.0000  |                                                                              |  |  |    |                         |    |   |   |   |   |
| FN0454  | 0.562                  | 15.484               | 1.351e-1 | 1.513e-1 | 69   | 173  | 100.7811  | 225.1797  | AAL94650.1  Aldehyde dehydrogenase B                                         |  |  |    |                         |    |   |   |   |   |
|         |                        |                      |          |          | 236  | 295  | 251.5805  | 295.0000  |                                                                              |  |  |    |                         |    |   |   |   |   |
| FN0455  | 0.644                  | 18.038               | 1.388e-2 | 2.762e-3 | 315  | 547  | 460.0876  | 711.9843  | AAL94651.1  Rubrerythrin                                                     |  |  |    |                         |    |   |   |   |   |
|         |                        |                      |          |          | 347  | 585  | 369.9087  | 585.0000  |                                                                              |  |  |    |                         |    |   |   |   |   |
| FN0456  | -0.148                 | 7.733                | 3.022e-1 | 5.655e-1 | 13   | 9    | 18.9877   | 11.7145   | AAL94652.1  Hypothetical cytosolic protein                                   |  |  |    |                         |    |   |   |   |   |
|         |                        |                      |          |          | 11   | 16   | 11.7262   | 16.0000   |                                                                              |  |  |    |                         |    |   |   |   |   |
| FN0458  | -0.725                 | 6.798                | 1.092e-1 | 1.002e-1 | 12   | 8    | 17.5271   | 10.4129   | AAL94654.1  Hypothetical Exported Protein                                    |  |  |    |                         |    |   |   |   |   |
|         |                        |                      |          |          | 9    | 6    | 9.5942    | 6.0000    |                                                                              |  |  |    |                         |    |   |   |   |   |
| FN0460  | -2.071                 | 9.728                |          |          |      | 8    |           | 10.4129   | AAL94656.1  Delta-aminolevulinic acid dehydratase                            |  |  |    |                         |    |   |   |   |   |
|         |                        |                      |          |          | 56   | 18   | 59.6971   | 18.0000   |                                                                              |  |  |    |                         |    |   |   |   |   |
| FN0461  | -0.836                 | 16.434               | 1.356e-1 | 1.524e-1 | 381  | 177  | 556.4869  | 230.3861  | AAL94657.1  Probable sigma(54) modulation protein                            |  |  |    |                         |    |   |   |   |   |
|         |                        |                      |          |          | 224  | 215  | 238.7883  | 215.0000  |                                                                              |  |  |    |                         |    |   |   |   |   |
| FN0462  | 1.025                  | 12.425               | 4.38e-2  | 1.773e-2 | 23   | 98   | 33.5937   | 127.5584  | AAL94658.1  DNA mismatch repair protein mutL                                 |  |  |    |                         |    |   |   |   |   |
|         |                        |                      |          |          | 66   | 84   | 70.3573   | 84.0000   |                                                                              |  |  |    |                         |    |   |   |   |   |
| FN0465  | -0.882                 | 15.866               | 2.019e-1 | 3.172e-1 | 377  | 166  | 550.6445  | 216.0683  | AAL94661.1  Hypothetical protein                                             |  |  |    |                         |    |   |   |   |   |
|         |                        |                      |          |          | 106  | 144  | 112.9980  | 144.0000  |                                                                              |  |  |    |                         |    |   |   |   |   |
| FN0466  | -0.036                 | 18.093               | 3.916e-1 | 8.402e-1 | 428  | 446  | 625.1349  | 580.5210  | AAL94662.1  Lysyl-tRNA synthetase                                            |  |  |    |                         |    |   |   |   |   |
|         |                        |                      |          |          | 418  | 464  | 445.5961  | 464.0000  |                                                                              |  |  |    |                         |    |   |   |   |   |
| FN0469  |                        |                      |          |          |      | 4    |           | 4.0000    | AAL94665.1  Copper homeostasis protein cutC                                  |  |  |    |                         |    |   |   |   |   |
|         |                        |                      |          |          |      |      |           |           |                                                                              |  |  |    |                         |    |   |   |   |   |
| FN0470  | -0.376                 | 18.056               | 9.883e-2 | 8.33e-2  | 343  | 310  | 500.9843  | 403.5011  | AAL94666.1  Putative efflux pump component MtrF                              |  |  |    |                         |    |   |   |   |   |
|         |                        |                      |          |          | 646  | 513  | 688.6485  | 513.0000  |                                                                              |  |  |    |                         |    |   |   |   |   |
| FN0472  | -0.628                 | 25.655               | 6.442e-2 | 3.553e-2 | 7225 | 4554 | 10552.802 | 5927.5618 | AAL94668.1  Flavodoxin                                                       |  |  |    |                         |    |   |   |   |   |
|         |                        |                      |          |          | 7052 | 5764 | 7517.5680 | 5764.0000 |                                                                              |  |  |    |                         |    |   |   |   |   |
| FN0474  |                        |                      |          |          |      | 4    |           | 5.2065    | AAL94670.1  Acriflavin resistance protein B                                  |  |  |    |                         |    |   |   |   |   |
|         |                        |                      |          |          |      |      |           |           |                                                                              |  |  |    |                         |    |   |   |   |   |
| FN0475  | 0.458                  | 9.562                |          |          |      | 28   |           | 36.4453   | AAL94671.1  MIAB protein                                                     |  |  |    |                         |    |   |   |   |   |
|         |                        |                      |          |          | 22   | 28   | 23.4524   | 28.0000   |                                                                              |  |  |    |                         |    |   |   |   |   |

Show detected proteins only  
 Show all proteins  
 Filter by category:

Proteins found: 1313

Test Cutoff

| Signif      | Direction | Applies To |
|-------------|-----------|------------|
| red         | yes       | +          |
| yellow      | no        | n/a        |
| green       | yes       | -          |
| pink        | yes       | +          |
| light green | yes       | -          |

Applies To: ratios, bars; ratios, bars; p-, q-Values

Fn Summary Table FnPg vs Fn FnSg vs Fn FnPgSg vs Fn FnPgSg vs FnPg FnSg vs FnPg FnPgSg vs FnSg Fn Coverage

| Protein | FnSg vs FnPg           |                      |          |          | Raw   |      | Normalized |           | Description                                           | Log <sub>2</sub> Ratios |    |    |   |   |   |   |
|---------|------------------------|----------------------|----------|----------|-------|------|------------|-----------|-------------------------------------------------------|-------------------------|----|----|---|---|---|---|
|         | Log <sub>2</sub> Ratio | Log <sub>2</sub> Sum | q-Value  | p-Value  | FnPg  | FnSg | FnPg       | FnSg      |                                                       | -6                      | -4 | -2 | 0 | 2 | 4 | 6 |
| FN0476  | 0.553                  | 12.183               | 9.89e-2  | 8.341e-2 | 26    | 57   | 37.9755    | 74.1921   | AAL94672.1  Transcription termination factor rho      |                         |    |    |   |   |   |   |
|         |                        |                      |          |          | 70    | 91   | 74.6213    | 91.0000   |                                                       |                         |    |    |   |   |   |   |
| FN0477  | 1.108                  | 9.077                | 4.597e-3 | 5.034e-4 | 10    | 24   | 14.6060    | 31.2388   | AAL94673.1  Cell wall endopeptidase family M23/M37    |                         |    |    |   |   |   |   |
|         |                        |                      |          |          | 16    | 37   | 17.0563    | 37.0000   |                                                       |                         |    |    |   |   |   |   |
| FN0478  | -0.145                 | 10.214               |          |          |       | 25   |            | 32.5404   | AAL94674.1  GcpE protein                              |                         |    |    |   |   |   |   |
|         |                        |                      |          |          | 34    | 33   | 36.2447    | 33.0000   |                                                       |                         |    |    |   |   |   |   |
| FN0479  |                        |                      |          |          |       | 9    |            | 11.7145   | AAL94675.1  RNA polymerase sigma-E factor             |                         |    |    |   |   |   |   |
|         |                        |                      |          |          |       | 25   |            | 25.0000   |                                                       |                         |    |    |   |   |   |   |
| FN0480  |                        |                      |          |          |       |      |            |           | AAL94676.1  unknown                                   |                         |    |    |   |   |   |   |
|         |                        |                      |          |          |       | 4    |            | 4.0000    |                                                       |                         |    |    |   |   |   |   |
| FN0481  | -0.311                 | 6.792                |          |          |       | 3    |            | 3.9048    | AAL94677.1  unknown                                   |                         |    |    |   |   |   |   |
|         |                        |                      |          |          | 11    | 15   | 11.7262    | 15.0000   |                                                       |                         |    |    |   |   |   |   |
| FN0482  |                        |                      |          |          |       |      |            |           | AAL94678.1  LSU ribosomal protein L31P                |                         |    |    |   |   |   |   |
|         |                        |                      |          |          | 6     |      | 6.3961     |           |                                                       |                         |    |    |   |   |   |   |
| FN0483  | -0.269                 | 12.123               | 2.504e-1 | 4.361e-1 | 34    | 52   | 49.6602    | 67.6841   | AAL94679.1  Uracil phosphoribosyltransferase          |                         |    |    |   |   |   |   |
|         |                        |                      |          |          | 91    | 54   | 97.0078    | 54.0000   |                                                       |                         |    |    |   |   |   |   |
| FN0484  | 0.773                  | 5.602                |          |          |       | 7    |            | 9.1113    | AAL94680.1  Lipase                                    |                         |    |    |   |   |   |   |
|         |                        |                      |          |          | 5     |      | 5.3301     |           |                                                       |                         |    |    |   |   |   |   |
| FN0487  | 0.108                  | 20.456               | 3.514e-1 | 7.074e-1 | 548   | 1078 | 800.4063   | 1403.1427 | AAL94683.1  2-hydroxyglutarate dehydrogenase          |                         |    |    |   |   |   |   |
|         |                        |                      |          |          | 1416  | 1087 | 1509.4833  | 1087.0000 |                                                       |                         |    |    |   |   |   |   |
| FN0488  | 0.163                  | 24.209               | 3.054e-1 | 5.741e-1 | 1959  | 4005 | 2861.3066  | 5212.9743 | AAL94684.1  NAD-specific glutamate dehydrogenase      |                         |    |    |   |   |   |   |
|         |                        |                      |          |          | 5124  | 4107 | 5462.2828  | 4107.0000 |                                                       |                         |    |    |   |   |   |   |
| FN0489  | -0.382                 | 6.722                |          |          |       |      |            |           | AAL94685.1  Prolipoprotein diacylglycerol transferase |                         |    |    |   |   |   |   |
|         |                        |                      |          |          | 11    | 9    | 11.7262    | 9.0000    |                                                       |                         |    |    |   |   |   |   |
| FN0491  | 0.155                  | 15.097               | 3.622e-1 | 7.414e-1 | 59    | 123  | 86.1751    | 160.0988  | AAL94687.1  Alanine racemase                          |                         |    |    |   |   |   |   |
|         |                        |                      |          |          | 252   | 235  | 268.6369   | 235.0000  |                                                       |                         |    |    |   |   |   |   |
| FN0493  | -0.507                 | 8.176                | 1.956e-1 | 3.031e-1 | 19    | 15   | 27.7513    | 19.5242   | AAL94689.1  Hypothetical protein                      |                         |    |    |   |   |   |   |
|         |                        |                      |          |          | 12    | 9    | 12.7922    | 9.0000    |                                                       |                         |    |    |   |   |   |   |
| FN0494  | -0.915                 | 14.912               | 3.853e-2 | 1.411e-2 | 136   | 69   | 198.6410   | 89.8115   | AAL94690.1  Short chain dehydrogenase                 |                         |    |    |   |   |   |   |
|         |                        |                      |          |          | 266   | 166  | 283.5611   | 166.0000  |                                                       |                         |    |    |   |   |   |   |
| FN0495  | -0.333                 | 26.760               | 6.737e-4 | 1.257e-5 | 8224  | 7402 | 12011.937  | 9634.5658 | AAL94691.1  Acetyl-CoA acetyltransferase              |                         |    |    |   |   |   |   |
|         |                        |                      |          |          | 11175 | 9364 | 11912.765  | 9364.0000 |                                                       |                         |    |    |   |   |   |   |

Show detected proteins only  
 Show all proteins  
 Filter by category:

Proteins found: 1313

Test Cutoff

| Signif | Direction | Applies To   |
|--------|-----------|--------------|
| yes    | +         | ratios, bars |
| no     | n/a       | bars         |
| yes    | -         | ratios, bars |
| yes    | +         | p-, q-Values |
| yes    | -         |              |

Fn Summary Table FnPg vs Fn FnSg vs Fn FnPgSg vs Fn FnPgSg vs FnPg FnSg vs FnPg FnPgSg vs FnSg Fn Coverage

| Protein | FnSg vs FnPg           |                      |          |          | Raw  |      |          |          | Normalized |      |      |      | Description                                                    | Log <sub>2</sub> Ratios |    |    |   |   |   |   |
|---------|------------------------|----------------------|----------|----------|------|------|----------|----------|------------|------|------|------|----------------------------------------------------------------|-------------------------|----|----|---|---|---|---|
|         | Log <sub>2</sub> Ratio | Log <sub>2</sub> Sum | q-Value  | p-Value  | FnPg | FnSg | FnPg     | FnSg     | FnPg       | FnSg | FnPg | FnSg |                                                                |                         |    |    |   |   |   |   |
|         |                        |                      |          |          |      |      |          |          |            |      |      |      |                                                                | -6                      | -4 | -2 | 0 | 2 | 4 | 6 |
| FN0501  | 0.449                  | 17.998               | 1.558e-1 | 2.044e-1 | 183  | 420  | 267.2890 | 546.6790 |            |      |      |      | AAL94697.1  Ornithine decarboxylase                            |                         |    |    |   |   |   |   |
|         |                        |                      |          |          | 571  | 649  | 608.6970 | 649.0000 |            |      |      |      |                                                                |                         |    |    |   |   |   |   |
| FN0502  | -0.028                 | 9.075                |          |          |      |      |          |          |            |      |      |      | AAL94698.1  Phosphoheptose isomerase                           |                         |    |    |   |   |   |   |
|         |                        |                      |          |          | 22   | 23   | 23.4524  | 23.0000  |            |      |      |      |                                                                |                         |    |    |   |   |   |   |
| FN0503  | 0.369                  | 10.998               | 1.683e-1 | 2.34e-1  | 18   | 39   | 26.2907  | 50.7630  |            |      |      |      | AAL94699.1  Transcriptional regulatory protein, LYSR family    |                         |    |    |   |   |   |   |
|         |                        |                      |          |          | 50   | 52   | 53.3010  | 52.0000  |            |      |      |      |                                                                |                         |    |    |   |   |   |   |
| FN0505  | -1.240                 | 11.169               | 1.138e-1 | 1.081e-1 | 28   | 18   | 40.8967  | 23.4291  |            |      |      |      | AAL94701.1  Anthranilate synthase component II                 |                         |    |    |   |   |   |   |
|         |                        |                      |          |          | 100  | 39   | 106.6019 | 39.0000  |            |      |      |      |                                                                |                         |    |    |   |   |   |   |
| FN0506  | -0.647                 | 13.894               | 1.081e-1 | 9.817e-2 | 134  | 67   | 195.7198 | 87.2083  |            |      |      |      | AAL94702.1  Arginyl-tRNA synthetase                            |                         |    |    |   |   |   |   |
|         |                        |                      |          |          | 106  | 110  | 112.9980 | 110.0000 |            |      |      |      |                                                                |                         |    |    |   |   |   |   |
| FN0511  | 0.189                  | 11.954               | 3.714e-1 | 7.714e-1 | 10   | 58   | 14.6060  | 75.4938  |            |      |      |      | AAL94707.1  D-lactate dehydrogenase                            |                         |    |    |   |   |   |   |
|         |                        |                      |          |          | 97   | 59   | 103.4039 | 59.0000  |            |      |      |      |                                                                |                         |    |    |   |   |   |   |
| FN0512  | -0.489                 | 16.189               | 2.394e-3 | 1.65e-4  | 223  | 171  | 325.7128 | 222.5764 |            |      |      |      | AAL94708.1  Flavoprotein                                       |                         |    |    |   |   |   |   |
|         |                        |                      |          |          | 302  | 239  | 321.9378 | 239.0000 |            |      |      |      |                                                                |                         |    |    |   |   |   |   |
| FN0513  | 0.555                  | 7.795                | 1.212e-1 | 1.219e-1 | 11   | 17   | 16.0666  | 22.1275  |            |      |      |      | AAL94709.1  Flavodoxin                                         |                         |    |    |   |   |   |   |
|         |                        |                      |          |          | 8    | 14   | 8.5282   | 14.0000  |            |      |      |      |                                                                |                         |    |    |   |   |   |   |
| FN0515  | 1.249                  | 4.604                |          |          |      | 4    |          | 5.2065   |            |      |      |      | AAL94711.1  Acriflavin resistance protein D                    |                         |    |    |   |   |   |   |
|         |                        |                      |          |          | 3    | 10   | 3.1981   | 10.0000  |            |      |      |      |                                                                |                         |    |    |   |   |   |   |
| FN0516  |                        |                      |          |          |      |      |          |          |            |      |      |      | AAL94712.1  Acriflavin resistance protein E                    |                         |    |    |   |   |   |   |
|         |                        |                      |          |          | 4    |      | 4.2641   |          |            |      |      |      |                                                                |                         |    |    |   |   |   |   |
| FN0517  | 0.979                  | 5.808                |          |          |      | 10   |          | 13.0162  |            |      |      |      | AAL94713.1  Outer membrane protein toIC                        |                         |    |    |   |   |   |   |
|         |                        |                      |          |          | 5    | 8    | 5.3301   | 8.0000   |            |      |      |      |                                                                |                         |    |    |   |   |   |   |
| FN0519  | -0.466                 | 6.760                | 1.258e-1 | 1.313e-1 | 8    | 9    | 11.6848  | 11.7145  |            |      |      |      | AAL94715.1  Hypothetical exported 24-amino acid repeat protein |                         |    |    |   |   |   |   |
|         |                        |                      |          |          | 12   | 6    | 12.7922  | 6.0000   |            |      |      |      |                                                                |                         |    |    |   |   |   |   |
| FN0522  | 0.631                  | 7.459                |          |          |      | 10   |          | 13.0162  |            |      |      |      | AAL94718.1  Exonuclease SBCC                                   |                         |    |    |   |   |   |   |
|         |                        |                      |          |          | 10   | 20   | 10.6602  | 20.0000  |            |      |      |      |                                                                |                         |    |    |   |   |   |   |
| FN0523  | 0.823                  | 5.086                |          |          | 3    | 5    | 4.3818   | 6.5081   |            |      |      |      | AAL94719.1  Exonuclease SBCC                                   |                         |    |    |   |   |   |   |
|         |                        |                      |          |          |      | 9    |          | 9.0000   |            |      |      |      |                                                                |                         |    |    |   |   |   |   |
| FN0524  | 0.131                  | 6.289                | 3.37e-1  | 6.635e-1 | 5    | 5    | 7.3030   | 6.5081   |            |      |      |      | AAL94720.1  DNA helicase II                                    |                         |    |    |   |   |   |   |
|         |                        |                      |          |          | 9    | 12   | 9.5942   | 12.0000  |            |      |      |      |                                                                |                         |    |    |   |   |   |   |
| FN0525  | 0.887                  | 14.933               | 9.659e-2 | 8.002e-2 | 38   | 219  | 55.5026  | 285.0540 |            |      |      |      | AAL94721.1  Penicillin-binding protein                         |                         |    |    |   |   |   |   |
|         |                        |                      |          |          | 192  | 196  | 204.6757 | 196.0000 |            |      |      |      |                                                                |                         |    |    |   |   |   |   |

Show detected proteins only  
 Show all proteins  
 Filter by category:

Proteins found: 1313

Test Cutoff

| Signif | Direction | Applies To   |
|--------|-----------|--------------|
| yes    | +         | ratios, bars |
| no     | n/a       | bars         |
| yes    | -         | ratios, bars |
| yes    | +         | p-, q-Values |
| yes    | -         |              |

Fn Summary Table FnPg vs Fn FnSg vs Fn FnPgSg vs Fn FnPgSg vs FnPg FnSg vs FnPg FnPgSg vs FnSg Fn Coverage

| Protein       | FnSg vs FnPg           |                      |          |          | Raw  |      | Normalized |          | Description                                                   | Log <sub>2</sub> Ratios |                                            |    |   |   |   |   |
|---------------|------------------------|----------------------|----------|----------|------|------|------------|----------|---------------------------------------------------------------|-------------------------|--------------------------------------------|----|---|---|---|---|
|               | Log <sub>2</sub> Ratio | Log <sub>2</sub> Sum | q-Value  | p-Value  | FnPg | FnSg | FnPg       | FnSg     |                                                               | -6                      | -4                                         | -2 | 0 | 2 | 4 | 6 |
|               | <b>FN0526</b>          | -0.035               | 11.865   |          |      |      | 42         |          |                                                               | 54.6679                 | AAL94722.1  Florfenicol resistance protein |    |   |   |   |   |
|               |                        |                      |          |          | 58   | 66   | 61.8291    | 66.0000  |                                                               |                         |                                            |    |   |   |   |   |
| <b>FN0527</b> | 0.168                  | 11.089               | 2.08e-1  | 3.312e-1 | 26   | 33   | 37.9755    | 42.9533  | AAL94723.1  Alanyl-tRNA synthetase                            |                         |                                            |    |   |   |   |   |
|               |                        |                      |          |          | 47   | 56   | 50.1029    | 56.0000  |                                                               |                         |                                            |    |   |   |   |   |
| <b>FN0528</b> | -3.178                 | 13.061               | 1.321e-1 | 1.446e-1 | 340  | 28   | 496.6025   | 36.4453  | AAL94724.1  Cold shock protein                                |                         |                                            |    |   |   |   |   |
|               |                        |                      |          |          | 56   | 25   | 59.6971    | 25.0000  |                                                               |                         |                                            |    |   |   |   |   |
| <b>FN0535</b> | -0.792                 | 10.664               | 1.084e-2 | 1.924e-3 | 39   | 24   | 56.9632    | 31.2388  | AAL94731.1  Hypothetical protein                              |                         |                                            |    |   |   |   |   |
|               |                        |                      |          |          | 46   | 30   | 49.0369    | 30.0000  |                                                               |                         |                                            |    |   |   |   |   |
| <b>FN0536</b> | 0.062                  | 15.130               | 3.784e-1 | 7.947e-1 | 94   | 159  | 137.2960   | 206.9570 | AAL94732.1  DNA polymerase III, beta chain                    |                         |                                            |    |   |   |   |   |
|               |                        |                      |          |          | 219  | 180  | 233.4582   | 180.0000 |                                                               |                         |                                            |    |   |   |   |   |
| <b>FN0540</b> | 0.419                  | 10.679               | 2.342e-1 | 3.957e-1 | 10   | 32   | 14.6060    | 41.6517  | AAL94736.1  Glutamate-1-semialdehyde 2,1-aminomutase          |                         |                                            |    |   |   |   |   |
|               |                        |                      |          |          | 52   | 52   | 55.4330    | 52.0000  |                                                               |                         |                                            |    |   |   |   |   |
| <b>FN0541</b> |                        |                      |          |          |      | 6    |            | 7.8097   | AAL94737.1  polysaccharide deacetylase                        |                         |                                            |    |   |   |   |   |
|               |                        |                      |          |          |      | 11   |            | 11.0000  |                                                               |                         |                                            |    |   |   |   |   |
| <b>FN0542</b> | 0.192                  | 9.997                | 3.784e-1 | 7.949e-1 | 3    | 31   | 4.3818     | 40.3501  | AAL94738.1  Beta 1,4 glucosyltransferase                      |                         |                                            |    |   |   |   |   |
|               |                        |                      |          |          | 52   | 28   | 55.4330    | 28.0000  |                                                               |                         |                                            |    |   |   |   |   |
| <b>FN0543</b> | -0.511                 | 8.900                | 2.444e-1 | 4.214e-1 | 8    | 12   | 11.6848    | 15.6194  | AAL94739.1  Lipopolysaccharide heptosyltransferase-1          |                         |                                            |    |   |   |   |   |
|               |                        |                      |          |          | 38   | 21   | 40.5087    | 21.0000  |                                                               |                         |                                            |    |   |   |   |   |
| <b>FN0544</b> |                        |                      |          |          |      |      |            |          | AAL94740.1  ADP-heptose:LPS heptosyltransferase II            |                         |                                            |    |   |   |   |   |
|               |                        |                      |          |          | 3    |      | 3.1981     |          |                                                               |                         |                                            |    |   |   |   |   |
| <b>FN0546</b> |                        |                      |          |          |      |      |            |          | AAL94742.1  Lipopolysaccharide core biosynthesis protein rfaQ |                         |                                            |    |   |   |   |   |
|               |                        |                      |          |          | 6    |      | 6.3961     |          |                                                               |                         |                                            |    |   |   |   |   |
| <b>FN0547</b> | 0.900                  | 16.482               | 6.395e-2 | 3.507e-2 | 88   | 304  | 128.5324   | 395.6914 | AAL94743.1  RecA protein                                      |                         |                                            |    |   |   |   |   |
|               |                        |                      |          |          | 295  | 431  | 314.4757   | 431.0000 |                                                               |                         |                                            |    |   |   |   |   |
| <b>FN0549</b> |                        |                      |          |          |      |      |            |          | AAL94745.1  O-sialoglycoprotein endopeptidase                 |                         |                                            |    |   |   |   |   |
|               |                        |                      |          |          |      | 13   |            | 13.0000  |                                                               |                         |                                            |    |   |   |   |   |
| <b>FN0550</b> | -1.381                 | 8.739                | 1.179e-1 | 1.155e-1 | 34   | 12   | 49.6602    | 15.6194  | AAL94746.1  hypothetical Protein                              |                         |                                            |    |   |   |   |   |
|               |                        |                      |          |          | 16   | 10   | 17.0563    | 10.0000  |                                                               |                         |                                            |    |   |   |   |   |
| <b>FN0552</b> | 0.058                  | 9.532                | 3.897e-1 | 8.338e-1 | 19   | 15   | 27.7513    | 19.5242  | AAL94748.1  Serine racemase                                   |                         |                                            |    |   |   |   |   |
|               |                        |                      |          |          | 24   | 36   | 25.5845    | 36.0000  |                                                               |                         |                                            |    |   |   |   |   |
| <b>FN0553</b> | 0.524                  | 15.182               | 1.491e-1 | 1.876e-1 | 64   | 144  | 93.4781    | 187.4328 | AAL94749.1  D-serine dehydratase                              |                         |                                            |    |   |   |   |   |
|               |                        |                      |          |          | 214  | 275  | 228.1281   | 275.0000 |                                                               |                         |                                            |    |   |   |   |   |

Show detected proteins only  
 Show all proteins  
 Filter by category:

Proteins found: 1313

Enter (or paste) list of ORFs

Find ORFs

Test Cutoff

q-Value

p-Value

.005

| Signif | Direction | Applies To   |
|--------|-----------|--------------|
| yes    | +         | ratios, bars |
| no     | n/a       | bars         |
| yes    | -         | ratios, bars |
| yes    | +         | p-, q-Values |
| yes    | -         | p-, q-Values |

Dot Plots Dot Plots

Fn Summary Table FnPg vs Fn FnSg vs Fn FnPgSg vs Fn FnPgSg vs FnPg FnSg vs FnPg FnPgSg vs FnSg Fn Coverage

| Protein | FnSg vs FnPg           |                      |          |          | Raw  |      | Normalized |          | Description                                                                         | Log <sub>2</sub> Ratios |    |    |   |   |   |   |
|---------|------------------------|----------------------|----------|----------|------|------|------------|----------|-------------------------------------------------------------------------------------|-------------------------|----|----|---|---|---|---|
|         | Log <sub>2</sub> Ratio | Log <sub>2</sub> Sum | q-Value  | p-Value  | FnPg | FnSg | FnPg       | FnSg     |                                                                                     |                         |    |    |   |   |   |   |
|         |                        |                      |          |          |      |      |            |          |                                                                                     | -6                      | -4 | -2 | 0 | 2 | 4 | 6 |
| FN0554  | 0.286                  | 8.642                | 2.214e-1 | 3.633e-1 | 8    | 17   | 11.6848    | 22.1275  | AAL94750.1  D-serine permease                                                       |                         |    |    |   |   |   |   |
|         |                        |                      |          |          | 23   | 22   | 24.5184    | 22.0000  |                                                                                     |                         |    |    |   |   |   |   |
| FN0555  |                        |                      |          |          |      |      |            |          | AAL94751.1  Transcriptional regulator, MerR family                                  |                         |    |    |   |   |   |   |
|         |                        |                      |          |          | 6    |      | 7.8097     |          |                                                                                     |                         |    |    |   |   |   |   |
| FN0556  | -0.517                 | 11.707               | 2.519e-1 | 4.396e-1 | 75   | 42   | 109.5447   | 54.6679  | AAL94752.1  unknown                                                                 |                         |    |    |   |   |   |   |
|         |                        |                      |          |          | 27   | 42   | 28.7825    | 42.0000  |                                                                                     |                         |    |    |   |   |   |   |
| FN0557  | 0.637                  | 15.248               | 1.458e-1 | 1.784e-1 | 59   | 242  | 86.1751    | 314.9912 | AAL94753.1  unknown                                                                 |                         |    |    |   |   |   |   |
|         |                        |                      |          |          | 216  | 177  | 230.2602   | 177.0000 |                                                                                     |                         |    |    |   |   |   |   |
| FN0558  | -1.486                 | 15.058               |          |          |      |      |            |          | AAL94754.1  TraT complement resistance protein precursor                            |                         |    |    |   |   |   |   |
|         |                        |                      |          |          | 290  | 84   | 309.1456   | 84.0000  |                                                                                     |                         |    |    |   |   |   |   |
| FN0559  | -0.272                 | 15.468               | 2.57e-1  | 4.516e-1 | 105  | 151  | 153.3625   | 196.5441 | AAL94755.1  Phosphoglucomutase                                                      |                         |    |    |   |   |   |   |
|         |                        |                      |          |          | 295  | 191  | 314.4757   | 191.0000 |                                                                                     |                         |    |    |   |   |   |   |
| FN0560  |                        |                      |          |          |      |      |            |          | AAL94756.1  Oxygen-independent coproporphyrinogen III oxidase                       |                         |    |    |   |   |   |   |
|         |                        |                      |          |          |      | 6    |            | 6.0000   |                                                                                     |                         |    |    |   |   |   |   |
| FN0561  | -0.774                 | 10.406               | 4.26e-2  | 1.684e-2 | 28   | 21   | 40.8967    | 27.3339  | AAL94757.1  Proline synthetase associated protein                                   |                         |    |    |   |   |   |   |
|         |                        |                      |          |          | 52   | 29   | 55.4330    | 29.0000  |                                                                                     |                         |    |    |   |   |   |   |
| FN0562  | -0.100                 | 13.516               | 3.412e-1 | 6.762e-1 | 60   | 93   | 87.6357    | 121.0503 | AAL94758.1  Hypothetical cytosolic protein                                          |                         |    |    |   |   |   |   |
|         |                        |                      |          |          | 128  | 88   | 136.4505   | 88.0000  |                                                                                     |                         |    |    |   |   |   |   |
| FN0563  | 0.351                  | 6.660                | 2.811e-1 | 5.104e-1 | 10   | 9    | 14.6060    | 11.7145  | AAL94759.1  putative tRNA (5-methylaminomethyl-2-thiouridylate) - methyltransferase |                         |    |    |   |   |   |   |
|         |                        |                      |          |          | 3    | 11   | 3.1981     | 11.0000  |                                                                                     |                         |    |    |   |   |   |   |
| FN0576  | 0.959                  | 11.867               | 6.031e-2 | 3.168e-2 | 25   | 81   | 36.5149    | 105.4309 | AAL94772.1  hypothetical protein                                                    |                         |    |    |   |   |   |   |
|         |                        |                      |          |          | 48   | 65   | 51.1689    | 65.0000  |                                                                                     |                         |    |    |   |   |   |   |
| FN0577  | 0.351                  | 7.455                |          |          |      |      |            |          | AAL94773.1  Hypothetical protein                                                    |                         |    |    |   |   |   |   |
|         |                        |                      |          |          | 11   | 13   | 11.7262    | 13.0000  |                                                                                     |                         |    |    |   |   |   |   |
| FN0579  | -0.950                 | 19.619               | 8.566e-2 | 6.238e-2 | 1109 | 588  | 1619.8004  | 765.3505 | AAL94775.1  Hypothetical cytosolic protein                                          |                         |    |    |   |   |   |   |
|         |                        |                      |          |          | 821  | 526  | 875.2018   | 526.0000 |                                                                                     |                         |    |    |   |   |   |   |
| FN0580  | 1.308                  | 5.492                |          |          |      |      |            |          | AAL94776.1  Penicillin-binding protein                                              |                         |    |    |   |   |   |   |
|         |                        |                      |          |          | 4    | 12   | 4.2641     | 12.0000  |                                                                                     |                         |    |    |   |   |   |   |
| FN0581  | 0.873                  | 7.058                |          |          |      |      |            |          | AAL94777.1  Lipoprotein releasing system transmembrane protein lolE                 |                         |    |    |   |   |   |   |
|         |                        |                      |          |          | 8    |      | 8.5282     |          |                                                                                     |                         |    |    |   |   |   |   |
| FN0582  | 1.053                  | 9.578                |          |          |      |      |            |          | AAL94778.1  Lipoprotein releasing system ATP-binding protein lolD                   |                         |    |    |   |   |   |   |
|         |                        |                      |          |          | 18   | 38   | 19.1883    | 38.0000  |                                                                                     |                         |    |    |   |   |   |   |

Show detected proteins only  
 Show all proteins  
 Filter by category:

Proteins found: 1313

Test Cutoff

| Signif      | Direction | Applies To |
|-------------|-----------|------------|
| red         | yes       | +          |
| yellow      | no        | n/a        |
| green       | yes       | -          |
| pink        | yes       | +          |
| light green | yes       | -          |

Applies To: ratios, bars; bars; ratios, bars; p-, q-Values



Fn Summary Table FnPg vs Fn FnSg vs Fn FnPgSg vs Fn FnPgSg vs FnPg FnSg vs FnPg FnPgSg vs FnSg Fn Coverage

| Protein | FnSg vs FnPg           |                      |          |          | Raw  |      |          |          | Normalized                                                                   |        |    |    | Log <sub>2</sub> Ratios |   |   |   |  |  |  |
|---------|------------------------|----------------------|----------|----------|------|------|----------|----------|------------------------------------------------------------------------------|--------|----|----|-------------------------|---|---|---|--|--|--|
|         | Log <sub>2</sub> Ratio | Log <sub>2</sub> Sum | q-Value  | p-Value  | FnPg | FnSg | FnPg     | FnSg     | Description                                                                  |        |    |    |                         |   |   |   |  |  |  |
|         |                        |                      |          |          |      |      |          |          |                                                                              | -6     | -4 | -2 | 0                       | 2 | 4 | 6 |  |  |  |
| FN0610  | -0.320                 | 15.476               | 2.7e-1   | 4.828e-1 | 93   | 153  | 135.8354 | 199.1473 | AAL94806.1  unknown                                                          |        |    |    |                         |   |   |   |  |  |  |
|         |                        |                      |          |          | 320  | 183  | 341.1262 | 183.0000 |                                                                              |        |    |    |                         |   |   |   |  |  |  |
| FN0611  | 0.320                  | 19.168               | 3.881e-2 | 1.429e-2 | 461  | 612  | 673.3345 | 796.5893 | AAL94807.1  Threonyl-tRNA synthetase                                         |        |    |    |                         |   |   |   |  |  |  |
|         |                        |                      |          |          | 657  | 918  | 700.3747 | 918.0000 |                                                                              |        |    |    |                         |   |   |   |  |  |  |
| FN0612  | 0.387                  | 11.172               | 2.415e-1 | 4.143e-1 | 13   | 36   | 18.9877  | 46.8582  | AAL94808.1  Hypothetical protein                                             |        |    |    |                         |   |   |   |  |  |  |
|         |                        |                      |          |          | 61   | 63   | 65.0272  | 63.0000  |                                                                              |        |    |    |                         |   |   |   |  |  |  |
| FN0614  |                        |                      |          |          |      |      |          |          | AAL94810.1  Export ABC transporter                                           |        |    |    |                         |   |   |   |  |  |  |
|         |                        |                      |          |          |      |      |          | 3        |                                                                              | 3.0000 |    |    |                         |   |   |   |  |  |  |
| FN0615  |                        |                      |          |          | 3    |      | 4.3818   |          | AAL94811.1  Export ABC transporter                                           |        |    |    |                         |   |   |   |  |  |  |
|         |                        |                      |          |          |      |      |          |          |                                                                              |        |    |    |                         |   |   |   |  |  |  |
| FN0616  |                        |                      |          |          |      |      |          |          | AAL94812.1  Hypothetical protein                                             |        |    |    |                         |   |   |   |  |  |  |
|         |                        |                      |          |          | 7    |      | 7.4621   |          |                                                                              |        |    |    |                         |   |   |   |  |  |  |
| FN0617  | -1.889                 | 15.192               | 9.783e-2 | 8.183e-2 | 380  | 73   | 555.0263 | 95.0180  | AAL94813.1  DNA polymerase III, beta chain                                   |        |    |    |                         |   |   |   |  |  |  |
|         |                        |                      |          |          | 178  | 106  | 189.7514 | 106.0000 |                                                                              |        |    |    |                         |   |   |   |  |  |  |
| FN0618  | -0.326                 | 13.483               | 2.987e-1 | 5.562e-1 | 40   | 90   | 58.4238  | 117.1455 | AAL94814.1  Spermidine/putrescine-binding protein                            |        |    |    |                         |   |   |   |  |  |  |
|         |                        |                      |          |          | 170  | 74   | 181.2233 | 74.0000  |                                                                              |        |    |    |                         |   |   |   |  |  |  |
| FN0619  | -0.085                 | 7.554                | 4.027e-1 | 8.801e-1 | 4    | 12   | 5.8424   | 15.6194  | AAL94815.1  Small-conductance mechanosensitive channel                       |        |    |    |                         |   |   |   |  |  |  |
|         |                        |                      |          |          | 21   | 11   | 22.3864  | 11.0000  |                                                                              |        |    |    |                         |   |   |   |  |  |  |
| FN0621  | -0.431                 | 11.289               | 1.955e-1 | 3.027e-1 | 54   | 37   | 78.8722  | 48.1598  | AAL94817.1  4-hydroxybutyrate coenzyme A transferase                         |        |    |    |                         |   |   |   |  |  |  |
|         |                        |                      |          |          | 35   | 38   | 37.3107  | 38.0000  |                                                                              |        |    |    |                         |   |   |   |  |  |  |
| FN0622  | 1.262                  | 11.804               | 4.144e-2 | 1.602e-2 | 12   | 57   | 17.5271  | 74.1921  | AAL94818.1  8-oxoguanine DNA glycosylase                                     |        |    |    |                         |   |   |   |  |  |  |
|         |                        |                      |          |          | 56   | 111  | 59.6971  | 111.0000 |                                                                              |        |    |    |                         |   |   |   |  |  |  |
| FN0625  | -0.547                 | 8.360                |          |          | 15   |      | 21.9089  |          | AAL94821.1  Aspartate aminotransferase                                       |        |    |    |                         |   |   |   |  |  |  |
|         |                        |                      |          |          |      |      | 15       | 15.0000  |                                                                              |        |    |    |                         |   |   |   |  |  |  |
| FN0626  |                        |                      |          |          |      |      |          |          | AAL94822.1  Hypothetical cytosolic protein                                   |        |    |    |                         |   |   |   |  |  |  |
|         |                        |                      |          |          |      |      | 12       | 12.0000  |                                                                              |        |    |    |                         |   |   |   |  |  |  |
| FN0627  | 0.231                  | 13.566               | 3.026e-1 | 5.665e-1 | 37   | 95   | 54.0420  | 123.6536 | AAL94823.1  Glucosamine--fructose-6-phosphate aminotransferase (isomerizing) |        |    |    |                         |   |   |   |  |  |  |
|         |                        |                      |          |          | 140  | 115  | 149.2427 | 115.0000 |                                                                              |        |    |    |                         |   |   |   |  |  |  |
| FN0628  |                        |                      |          |          |      |      |          | 6.5081   | AAL94824.1  Glucosamine--fructose-6-phosphate aminotransferase (isomerizing) |        |    |    |                         |   |   |   |  |  |  |
|         |                        |                      |          |          |      |      | 7        | 7.0000   |                                                                              |        |    |    |                         |   |   |   |  |  |  |
| FN0629  | 0.595                  | 8.780                |          |          |      |      |          | 32.5404  | AAL94825.1  PTS system, IID component                                        |        |    |    |                         |   |   |   |  |  |  |
|         |                        |                      |          |          | 16   | 19   | 17.0563  | 19.0000  |                                                                              |        |    |    |                         |   |   |   |  |  |  |

Show detected proteins only  
 Show all proteins  
 Filter by category:

Proteins found:  
 1313

Enter (or paste) list of ORFs

Test Cutoff

| Signif | Direction | Applies To   |
|--------|-----------|--------------|
| yes    | +         | ratios, bars |
| no     | n/a       | bars         |
| yes    | -         | ratios, bars |
| yes    | +         | p-, q-Values |
| yes    | -         | p-, q-Values |



Fn Summary Table FnPg vs Fn FnSg vs Fn FnPgSg vs Fn FnPgSg vs FnPg FnSg vs FnPg FnPgSg vs FnSg Fn Coverage

| Protein | FnSg vs FnPg           |                      |          |          | Raw  |      | Normalized |           | Description                                                  | Log <sub>2</sub> Ratios |    |    |   |   |   |   |
|---------|------------------------|----------------------|----------|----------|------|------|------------|-----------|--------------------------------------------------------------|-------------------------|----|----|---|---|---|---|
|         | Log <sub>2</sub> Ratio | Log <sub>2</sub> Sum | q-Value  | p-Value  | FnPg | FnSg | FnPg       | FnSg      |                                                              | -6                      | -4 | -2 | 0 | 2 | 4 | 6 |
| FN0631  | -0.070                 | 8.289                |          |          |      | 15   |            | 19.5242   | AAL94827.1  PTS system, IIB component                        |                         |    |    |   |   |   |   |
|         |                        |                      |          |          | 17   | 15   | 18.1223    | 15.0000   |                                                              |                         |    |    |   |   |   |   |
| FN0633  | -0.513                 | 7.485                |          |          |      | 8    |            | 10.4129   | AAL94829.1  Replication protein                              |                         |    |    |   |   |   |   |
|         |                        |                      |          |          | 15   | 12   | 15.9903    | 12.0000   |                                                              |                         |    |    |   |   |   |   |
| FN0634  | -1.658                 | 12.056               | 1.414e-1 | 1.665e-1 | 131  | 28   | 191.3380   | 36.4453   | AAL94830.1  GTP-binding protein TypA/BipA                    |                         |    |    |   |   |   |   |
|         |                        |                      |          |          | 38   | 37   | 40.5087    | 37.0000   |                                                              |                         |    |    |   |   |   |   |
| FN0643  | -0.635                 | 9.351                | 1.48e-1  | 1.846e-1 | 29   | 10   | 42.3573    | 13.0162   | AAL94839.1  hypothetical DNA-binding protein                 |                         |    |    |   |   |   |   |
|         |                        |                      |          |          | 20   | 28   | 21.3204    | 28.0000   |                                                              |                         |    |    |   |   |   |   |
| FN0644  | -0.629                 | 10.902               | 4.995e-2 | 2.264e-2 | 38   | 21   | 55.5026    | 27.3339   | AAL94840.1  Uroporphyrin-III C-methyltransferase             |                         |    |    |   |   |   |   |
|         |                        |                      |          |          | 50   | 43   | 53.3010    | 43.0000   |                                                              |                         |    |    |   |   |   |   |
| FN0645  | -0.410                 | 5.580                |          |          | 8    |      | 11.6848    |           | AAL94841.1  Porphobilinogen deaminase                        |                         |    |    |   |   |   |   |
|         |                        |                      |          |          | 4    | 6    | 4.2641     | 6.0000    |                                                              |                         |    |    |   |   |   |   |
| FN0646  |                        |                      |          |          |      |      |            |           | AAL94842.1  Glutamyl-tRNA reductase                          |                         |    |    |   |   |   |   |
|         |                        |                      |          |          |      | 3    |            | 3.0000    |                                                              |                         |    |    |   |   |   |   |
| FN0649  |                        |                      |          |          | 6    |      | 8.7636     |           | AAL94845.1  Exoenzymes regulatory protein aepA precursor     |                         |    |    |   |   |   |   |
|         |                        |                      |          |          |      |      |            |           |                                                              |                         |    |    |   |   |   |   |
| FN0651  |                        |                      |          |          |      |      |            |           | AAL94847.1  Ribosomal large subunit pseudouridine synthase D |                         |    |    |   |   |   |   |
|         |                        |                      |          |          |      | 6    |            | 6.0000    |                                                              |                         |    |    |   |   |   |   |
| FN0652  | 0.643                  | 25.505               | 9.371e-2 | 7.596e-2 | 2352 | 5960 | 3435.3206  | 7757.6347 | AAL94848.1  Glyceraldehyde 3-phosphate dehydrogenase         |                         |    |    |   |   |   |   |
|         |                        |                      |          |          | 7137 | 9493 | 7608.1796  | 9493.0000 |                                                              |                         |    |    |   |   |   |   |
| FN0653  | 0.659                  | 12.862               | 8.06e-2  | 5.492e-2 | 32   | 69   | 46.7391    | 89.8115   | AAL94849.1  unknown                                          |                         |    |    |   |   |   |   |
|         |                        |                      |          |          | 85   | 127  | 90.6116    | 127.0000  |                                                              |                         |    |    |   |   |   |   |
| FN0654  | 1.001                  | 19.852               | 7.062e-3 | 1.02e-3  | 368  | 1156 | 537.4991   | 1504.6687 | AAL94850.1  Phosphoglycerate kinase                          |                         |    |    |   |   |   |   |
|         |                        |                      |          |          | 786  | 1248 | 837.8912   | 1248.0000 |                                                              |                         |    |    |   |   |   |   |
| FN0655  | 0.524                  | 7.628                |          |          |      | 19   |            | 24.7307   | AAL94851.1  unknown                                          |                         |    |    |   |   |   |   |
|         |                        |                      |          |          | 11   | 9    | 11.7262    | 9.0000    |                                                              |                         |    |    |   |   |   |   |
| FN0657  | 1.251                  | 10.355               |          |          |      | 42   |            | 54.6679   | AAL94853.1  Acetyltransferase                                |                         |    |    |   |   |   |   |
|         |                        |                      |          |          | 22   | 57   | 23.4524    | 57.0000   |                                                              |                         |    |    |   |   |   |   |
| FN0658  | -0.254                 | 11.894               | 2.477e-3 | 1.78e-4  | 47   | 43   | 68.6480    | 55.9695   | AAL94854.1  ABC transporter substrate-binding protein        |                         |    |    |   |   |   |   |
|         |                        |                      |          |          | 62   | 57   | 66.0932    | 57.0000   |                                                              |                         |    |    |   |   |   |   |
| FN0660  | -0.419                 | 6.456                | 1.751e-1 | 2.506e-1 | 9    | 4    | 13.1454    | 5.2065    | AAL94856.1  ABC transporter ATP-binding protein              |                         |    |    |   |   |   |   |
|         |                        |                      |          |          | 8    | 11   | 8.5282     | 11.0000   |                                                              |                         |    |    |   |   |   |   |

Show detected proteins only  
 Show all proteins  
 Filter by category:

Proteins found: 1313

Test Cutoff

| Signif | Direction | Applies To   |
|--------|-----------|--------------|
| yes    | +         | ratios, bars |
| no     | n/a       | bars         |
| yes    | -         | ratios, bars |
| yes    | +         | p-, q-Values |
| yes    | -         | p-, q-Values |

Fn Summary Table FnPg vs Fn FnSg vs Fn FnPgSg vs Fn FnPgSg vs FnPg FnSg vs FnPg FnPgSg vs FnSg Fn Coverage

| Protein       | FnSg vs FnPg           |                      |          |          | Raw      |      | Normalized |           | Description                                                         | Log <sub>2</sub> Ratios |                                |    |   |   |   |   |
|---------------|------------------------|----------------------|----------|----------|----------|------|------------|-----------|---------------------------------------------------------------------|-------------------------|--------------------------------|----|---|---|---|---|
|               | Log <sub>2</sub> Ratio | Log <sub>2</sub> Sum | q-Value  | p-Value  | FnPg     | FnSg | FnPg       | FnSg      |                                                                     | -6                      | -4                             | -2 | 0 | 2 | 4 | 6 |
|               | <b>FN0662</b>          | 0.198                | 11.806   | 3.768e-1 | 7.893e-1 | 5    | 47         | 7.3030    |                                                                     | 61.1760                 | AAL94858.1  Formiminoglutamase |    |   |   |   |   |
|               |                        |                      |          |          | 98       | 67   | 104.4699   | 67.0000   |                                                                     |                         |                                |    |   |   |   |   |
| <b>FN0664</b> | 1.016                  | 13.333               | 1.705e-1 | 2.394e-1 | 73       | 46   | 106.6235   | 59.8744   | AAL94860.1  2-nitropropane dioxygenase                              |                         |                                |    |   |   |   |   |
|               |                        |                      |          |          | 34       | 229  | 36.2447    | 229.0000  |                                                                     |                         |                                |    |   |   |   |   |
| <b>FN0666</b> |                        |                      |          |          |          | 4    |            | 5.2065    | AAL94862.1  Hypothetical protein                                    |                         |                                |    |   |   |   |   |
|               |                        |                      |          |          |          | 7    |            | 7.0000    |                                                                     |                         |                                |    |   |   |   |   |
| <b>FN0668</b> | 0.016                  | 8.665                | 4.265e-1 | 9.708e-1 | 7        | 15   | 10.2242    | 19.5242   | AAL94864.1  High-affinity zinc uptake system protein znuA precursor |                         |                                |    |   |   |   |   |
|               |                        |                      |          |          | 28       | 21   | 29.8485    | 21.0000   |                                                                     |                         |                                |    |   |   |   |   |
| <b>FN0672</b> | 0.958                  | 7.142                |          |          |          | 17   |            | 22.1275   | AAL94868.1  ATPase                                                  |                         |                                |    |   |   |   |   |
|               |                        |                      |          |          | 8        | 11   | 8.5282     | 11.0000   |                                                                     |                         |                                |    |   |   |   |   |
| <b>FN0675</b> | 1.259                  | 22.417               | 7.412e-2 | 4.62e-2  | 331      | 2016 | 483.4571   | 2624.0590 | AAL94871.1  60 kDa chaperonin GROEL                                 |                         |                                |    |   |   |   |   |
|               |                        |                      |          |          | 2417     | 4698 | 2576.5686  | 4698.0000 |                                                                     |                         |                                |    |   |   |   |   |
| <b>FN0676</b> | -0.177                 | 10.991               |          |          |          | 36   |            | 46.8582   | AAL94872.1  10 kDa chaperonin GROES                                 |                         |                                |    |   |   |   |   |
|               |                        |                      |          |          | 45       | 38   | 47.9709    | 38.0000   |                                                                     |                         |                                |    |   |   |   |   |
| <b>FN0677</b> | 0.032                  | 12.193               | 4.123e-1 | 9.158e-1 | 62       | 51   | 90.5569    | 66.3824   | AAL94873.1  Hypothetical protein                                    |                         |                                |    |   |   |   |   |
|               |                        |                      |          |          | 42       | 72   | 44.7728    | 72.0000   |                                                                     |                         |                                |    |   |   |   |   |
| <b>FN0678</b> | 1.260                  | 10.418               | 6.35e-2  | 3.463e-2 | 5        | 48   | 7.3030     | 62.4776   | AAL94874.1  Ser/Thr protein kinase                                  |                         |                                |    |   |   |   |   |
|               |                        |                      |          |          | 38       | 52   | 40.5087    | 52.0000   |                                                                     |                         |                                |    |   |   |   |   |
| <b>FN0679</b> | -0.957                 | 7.297                |          |          | 21       |      | 30.6725    |           | AAL94875.1  GTPase                                                  |                         |                                |    |   |   |   |   |
|               |                        |                      |          |          | 4        | 9    | 4.2641     | 9.0000    |                                                                     |                         |                                |    |   |   |   |   |
| <b>FN0680</b> | 0.608                  | 6.793                |          |          |          |      |            |           | AAL94876.1  Ribulose-phosphate 3-epimerase                          |                         |                                |    |   |   |   |   |
|               |                        |                      |          |          | 8        | 13   | 8.5282     | 13.0000   |                                                                     |                         |                                |    |   |   |   |   |
| <b>FN0681</b> | -0.117                 | 16.579               | 2.764e-1 | 4.986e-1 | 260      | 212  | 379.7548   | 275.9427  | AAL94877.1  Transcriptional regulator, MarR family                  |                         |                                |    |   |   |   |   |
|               |                        |                      |          |          | 255      | 325  | 271.8349   | 325.0000  |                                                                     |                         |                                |    |   |   |   |   |
| <b>FN0682</b> | 0.639                  | 9.469                | 6.915e-2 | 4.046e-2 | 19       | 28   | 27.7513    | 36.4453   | AAL94878.1  Fibronectin-binding protein-like protein A              |                         |                                |    |   |   |   |   |
|               |                        |                      |          |          | 14       | 30   | 14.9243    | 30.0000   |                                                                     |                         |                                |    |   |   |   |   |
| <b>FN0684</b> | -0.796                 | 8.495                | 1.86e-1  | 2.775e-1 | 8        | 16   | 11.6848    | 20.8259   | AAL94880.1  Prismane protein                                        |                         |                                |    |   |   |   |   |
|               |                        |                      |          |          | 36       | 8    | 38.3767    | 8.0000    |                                                                     |                         |                                |    |   |   |   |   |
| <b>FN0685</b> | -0.486                 | 13.208               |          |          |          | 81   |            | 105.4309  | AAL94881.1  Sodium/pantothenate symporter                           |                         |                                |    |   |   |   |   |
|               |                        |                      |          |          | 108      | 59   | 115.1301   | 59.0000   |                                                                     |                         |                                |    |   |   |   |   |
| <b>FN0688</b> | 1.295                  | 11.094               |          |          |          | 58   |            | 75.4938   | AAL94884.1  Hypothetical protein                                    |                         |                                |    |   |   |   |   |
|               |                        |                      |          |          | 28       | 71   | 29.8485    | 71.0000   |                                                                     |                         |                                |    |   |   |   |   |

Show detected proteins only  
 Show all proteins  
 Filter by category:

Proteins found: 1313

Enter (or paste) list of ORFs

Find ORFs

Test Cutoff

q-Value

p-Value

.005

| Signif | Direction | Applies To   |
|--------|-----------|--------------|
| yes    | +         | ratios, bars |
| no     | n/a       | bars         |
| yes    | -         | ratios, bars |
| yes    | +         | p-, q-Values |
| yes    | -         | p-, q-Values |

Dot Plots Dot Plots

Fn Summary Table FnPg vs Fn FnSg vs Fn FnPgSg vs Fn FnPgSg vs FnPg FnSg vs FnPg FnPgSg vs FnSg Fn Coverage

| Protein | FnSg vs FnPg           |                      |          |          | Raw  |      | Normalized |          | Description                                      | Log <sub>2</sub> Ratios |    |    |   |   |   |   |
|---------|------------------------|----------------------|----------|----------|------|------|------------|----------|--------------------------------------------------|-------------------------|----|----|---|---|---|---|
|         | Log <sub>2</sub> Ratio | Log <sub>2</sub> Sum | q-Value  | p-Value  | FnPg | FnSg | FnPg       | FnSg     |                                                  | -6                      | -4 | -2 | 0 | 2 | 4 | 6 |
| FN0689  | 0.695                  | 14.514               | 1.458e-1 | 1.783e-1 | 42   | 196  | 61.3450    | 255.1168 | AAL94885.1  Hypothetical protein                 |                         |    |    |   |   |   |   |
|         |                        |                      |          |          | 168  | 134  | 179.0912   | 134.0000 |                                                  |                         |    |    |   |   |   |   |
| FN0692  |                        |                      |          |          |      | 4    |            | 5.2065   | AAL94888.1  Nitrogen regulation protein NIFR3    |                         |    |    |   |   |   |   |
|         |                        |                      |          |          |      | 8    |            | 8.0000   |                                                  |                         |    |    |   |   |   |   |
| FN0693  |                        |                      |          |          | 15   |      | 21.9089    |          | AAL94889.1  DNA mismatch repair protein mutS     |                         |    |    |   |   |   |   |
|         |                        |                      |          |          |      |      |            |          |                                                  |                         |    |    |   |   |   |   |
| FN0694  | 0.664                  | 11.419               | 5.857e-4 | 8.19e-6  | 27   | 49   | 39.4361    | 63.7792  | AAL94890.1  S-layer protein                      |                         |    |    |   |   |   |   |
|         |                        |                      |          |          | 41   | 68   | 43.7068    | 68.0000  |                                                  |                         |    |    |   |   |   |   |
| FN0695  | 0.749                  | 10.414               | 7.742e-2 | 5.045e-2 | 12   | 39   | 17.5271    | 50.7630  | AAL94891.1  ABC transporter ATP-binding protein  |                         |    |    |   |   |   |   |
|         |                        |                      |          |          | 37   | 45   | 39.4427    | 45.0000  |                                                  |                         |    |    |   |   |   |   |
| FN0697  | 0.234                  | 14.553               | 1.472e-1 | 1.822e-1 | 114  | 117  | 166.5079   | 152.2891 | AAL94893.1  Alanyl-tRNA synthetase               |                         |    |    |   |   |   |   |
|         |                        |                      |          |          | 112  | 184  | 119.3942   | 184.0000 |                                                  |                         |    |    |   |   |   |   |
| FN0699  | -0.498                 | 9.741                | 1.948e-1 | 3.009e-1 | 33   | 24   | 48.1997    | 31.2388  | AAL94895.1  Protein translocase subunit secD     |                         |    |    |   |   |   |   |
|         |                        |                      |          |          | 20   | 18   | 21.3204    | 18.0000  |                                                  |                         |    |    |   |   |   |   |
| FN0700  | -1.237                 | 7.147                | 8.815e-2 | 6.643e-2 | 17   | 5    | 24.8301    | 6.5081   | AAL94896.1  Protein translocase subunit secF     |                         |    |    |   |   |   |   |
|         |                        |                      |          |          | 11   | 9    | 11.7262    | 9.0000   |                                                  |                         |    |    |   |   |   |   |
| FN0701  | -0.565                 | 14.468               | 2.414e-3 | 1.68e-4  | 120  | 88   | 175.2715   | 114.5423 | AAL94897.1  Methyltransferase                    |                         |    |    |   |   |   |   |
|         |                        |                      |          |          | 179  | 133  | 190.8175   | 133.0000 |                                                  |                         |    |    |   |   |   |   |
| FN0705  | 0.395                  | 12.987               | 1.301e-1 | 1.401e-1 | 39   | 75   | 56.9632    | 97.6212  | AAL94901.1  DNA polymerase I                     |                         |    |    |   |   |   |   |
|         |                        |                      |          |          | 94   | 109  | 100.2058   | 109.0000 |                                                  |                         |    |    |   |   |   |   |
| FN0706  |                        |                      |          |          |      |      |            |          | AAL94902.1  Hypothetical cytosolic protein       |                         |    |    |   |   |   |   |
|         |                        |                      |          |          |      | 4    |            | 4.0000   |                                                  |                         |    |    |   |   |   |   |
| FN0707  | -0.758                 | 6.848                | 1.654e-1 | 2.271e-1 | 14   | 5    | 20.4483    | 6.5081   | AAL94903.1  Riboflavin kinase                    |                         |    |    |   |   |   |   |
|         |                        |                      |          |          | 7    | 10   | 7.4621     | 10.0000  |                                                  |                         |    |    |   |   |   |   |
| FN0710  | -0.226                 | 11.609               | 1.391e-1 | 1.607e-1 | 47   | 41   | 68.6480    | 53.3663  | AAL94906.1  Hypothetical protein                 |                         |    |    |   |   |   |   |
|         |                        |                      |          |          | 49   | 50   | 52.2349    | 50.0000  |                                                  |                         |    |    |   |   |   |   |
| FN0711  | 0.499                  | 8.858                |          |          |      | 14   |            | 18.2226  | AAL94907.1  Phosphopantothenate--cysteine ligase |                         |    |    |   |   |   |   |
|         |                        |                      |          |          | 17   | 33   | 18.1223    | 33.0000  |                                                  |                         |    |    |   |   |   |   |
| FN0714  | 0.579                  | 6.868                | 8.837e-2 | 6.68e-2  | 7    | 8    | 10.2242    | 10.4129  | AAL94910.1  NADH oxidase                         |                         |    |    |   |   |   |   |
|         |                        |                      |          |          | 7    | 16   | 7.4621     | 16.0000  |                                                  |                         |    |    |   |   |   |   |
| FN0715  | -0.108                 | 14.529               | 3.952e-1 | 8.53e-1  | 177  | 120  | 258.5254   | 156.1940 | AAL94911.1  Hypothetical protein                 |                         |    |    |   |   |   |   |
|         |                        |                      |          |          | 57   | 140  | 60.7631    | 140.0000 |                                                  |                         |    |    |   |   |   |   |

Show detected proteins only  
 Show all proteins  
 Filter by category:

Proteins found: 1313

Test Cutoff

| Signif | Direction | Applies To   |
|--------|-----------|--------------|
| yes    | +         | ratios, bars |
| no     | n/a       | bars         |
| yes    | -         | ratios, bars |
| yes    | +         | p-, q-Values |
| yes    | -         |              |

Fn Summary Table FnPg vs Fn FnSg vs Fn FnPgSg vs Fn FnPgSg vs FnPg FnSg vs FnPg FnPgSg vs FnSg Fn Coverage

| Protein | FnSg vs FnPg           |                      |          |          | Raw  |      | Normalized |          | Description                                                  | Log <sub>2</sub> Ratios |    |    |   |   |   |   |
|---------|------------------------|----------------------|----------|----------|------|------|------------|----------|--------------------------------------------------------------|-------------------------|----|----|---|---|---|---|
|         | Log <sub>2</sub> Ratio | Log <sub>2</sub> Sum | q-Value  | p-Value  | FnPg | FnSg | FnPg       | FnSg     |                                                              | -6                      | -4 | -2 | 0 | 2 | 4 | 6 |
| FN0716  | 0.735                  | 11.251               | 1.181e-1 | 1.158e-1 | 40   | 51   | 58.4238    | 66.3824  | AAL94912.1  hypothetical protein                             |                         |    |    |   |   |   |   |
|         |                        |                      |          |          | 17   | 61   | 18.1223    | 61.0000  |                                                              | ■                       |    |    |   |   |   |   |
| FN0717  |                        |                      |          |          |      |      |            |          | AAL94913.1  Ribosomal small subunit pseudouridine synthase A |                         |    |    |   |   |   |   |
|         |                        |                      |          |          |      | 5    |            | 5.0000   |                                                              |                         |    |    |   |   |   |   |
| FN0720  | 0.104                  | 12.681               | 3.747e-1 | 7.823e-1 | 45   | 40   | 65.7268    | 52.0647  | AAL94916.1  Protein Translation Elongation Factor P (EF-P)   |                         |    |    |   |   |   |   |
|         |                        |                      |          |          | 85   | 116  | 90.6116    | 116.0000 |                                                              |                         |    |    |   |   |   |   |
| FN0721  | 1.207                  | 9.191                | 5.226e-2 | 2.476e-2 | 5    | 28   | 7.3030     | 36.4453  | AAL94917.1  Hypothetical protein                             |                         |    |    |   |   |   |   |
|         |                        |                      |          |          | 23   | 37   | 24.5184    | 37.0000  |                                                              | ■                       |    |    |   |   |   |   |
| FN0722  | 0.199                  | 6.984                | 3.202e-1 | 6.151e-1 | 10   | 7    | 14.6060    | 9.1113   | AAL94918.1  WD-repeat family protein                         |                         |    |    |   |   |   |   |
|         |                        |                      |          |          | 6    | 15   | 6.3961     | 15.0000  |                                                              | ■                       |    |    |   |   |   |   |
| FN0723  | 0.230                  | 4.414                |          |          |      |      |            |          | AAL94919.1  Hypothetical protein                             |                         |    |    |   |   |   |   |
|         |                        |                      |          |          | 4    | 5    | 4.2641     | 5.0000   |                                                              | ■                       |    |    |   |   |   |   |
| FN0724  | 0.198                  | 11.870               | 2.208e-1 | 3.618e-1 | 41   | 40   | 59.8844    | 52.0647  | AAL94920.1  Flavodoxin                                       |                         |    |    |   |   |   |   |
|         |                        |                      |          |          | 51   | 79   | 54.3670    | 79.0000  |                                                              | ■                       |    |    |   |   |   |   |
| FN0725  | 0.942                  | 9.234                | 8.216e-2 | 5.711e-2 | 6    | 20   | 8.7636     | 26.0323  | AAL94921.1  Molybdopterin biosynthesis MoeB protein          |                         |    |    |   |   |   |   |
|         |                        |                      |          |          | 25   | 42   | 26.6505    | 42.0000  |                                                              | ■                       |    |    |   |   |   |   |
| FN0728  | 0.044                  | 11.030               | 2.072e-2 | 4.912e-3 | 31   | 36   | 45.2785    | 46.8582  | AAL94924.1  Hypothetical protein                             |                         |    |    |   |   |   |   |
|         |                        |                      |          |          | 42   | 46   | 44.7728    | 46.0000  |                                                              |                         |    |    |   |   |   |   |
| FN0729  | -0.672                 | 13.985               | 1.529e-1 | 1.974e-1 | 153  | 92   | 223.4711   | 119.7487 | AAL94925.1  Phosphoglycerate mutase                          |                         |    |    |   |   |   |   |
|         |                        |                      |          |          | 92   | 82   | 98.0738    | 82.0000  |                                                              | ■                       |    |    |   |   |   |   |
| FN0731  | -1.416                 | 9.709                | 8.692e-2 | 6.439e-2 | 45   | 18   | 65.7268    | 23.4291  | AAL94927.1  Hypothetical protein                             |                         |    |    |   |   |   |   |
|         |                        |                      |          |          | 27   | 12   | 28.7825    | 12.0000  |                                                              | ■                       |    |    |   |   |   |   |
| FN0733  | -0.640                 | 11.992               | 7.913e-2 | 5.28e-2  | 66   | 34   | 96.3993    | 44.2550  | AAL94929.1  Peptidase T                                      |                         |    |    |   |   |   |   |
|         |                        |                      |          |          | 59   | 58   | 62.8951    | 58.0000  |                                                              | ■                       |    |    |   |   |   |   |
| FN0734  |                        |                      |          |          |      |      |            | 3.9048   | AAL94930.1  Fe-S oxidoreductase                              |                         |    |    |   |   |   |   |
|         |                        |                      |          |          |      |      |            | 4.0000   |                                                              |                         |    |    |   |   |   |   |
| FN0735  | -1.836                 | 12.081               | 1.241e-1 | 1.275e-1 | 136  | 32   | 198.6410   | 41.6517  | AAL94931.1  Cell surface protein                             |                         |    |    |   |   |   |   |
|         |                        |                      |          |          | 47   | 28   | 50.1029    | 28.0000  |                                                              | ■                       |    |    |   |   |   |   |
| FN0736  | 1.465                  | 7.017                | 7.327e-3 | 1.095e-3 | 5    | 16   | 7.3030     | 20.8259  | AAL94932.1  Methyltransferase                                |                         |    |    |   |   |   |   |
|         |                        |                      |          |          | 6    | 17   | 6.3961     | 17.0000  |                                                              | ■                       |    |    |   |   |   |   |
| FN0737  |                        |                      |          |          |      |      |            |          | AAL94933.1  Hypothetical protein                             |                         |    |    |   |   |   |   |
|         |                        |                      |          |          | 28   |      | 29.8485    |          |                                                              |                         |    |    |   |   |   |   |

Show detected proteins only  
 Show all proteins  
 Filter by category:

Proteins found: 1313

Test Cutoff

| Signif      | Direction | Applies To |
|-------------|-----------|------------|
| red         | yes       | +          |
| yellow      | no        | n/a        |
| green       | yes       | -          |
| pink        | yes       | +          |
| light green | yes       | -          |

Applies To: ratios, bars; bars; ratios, bars; p-, q-Values

Fn Summary Table FnPg vs Fn FnSg vs Fn FnPgSg vs Fn FnPgSg vs FnPg FnSg vs FnPg FnPgSg vs FnSg Fn Coverage

| Protein | FnSg vs FnPg           |                      |          |          | Raw  |      |          |          | Normalized                                                     |  |  |  | Log <sub>2</sub> Ratios |  |  |  |  |  |  |
|---------|------------------------|----------------------|----------|----------|------|------|----------|----------|----------------------------------------------------------------|--|--|--|-------------------------|--|--|--|--|--|--|
|         | Log <sub>2</sub> Ratio | Log <sub>2</sub> Sum | q-Value  | p-Value  | FnPg | FnSg | FnPg     | FnSg     | Description                                                    |  |  |  |                         |  |  |  |  |  |  |
|         |                        |                      |          |          |      |      |          |          | -6 -4 -2 0 2 4 6                                               |  |  |  |                         |  |  |  |  |  |  |
| FN0738  | -0.137                 | 10.699               | 3.267e-1 | 6.335e-1 | 33   | 39   | 48.1997  | 50.7630  | AAL94934.1  Hypothetical exported 24-amino acid repeat protein |  |  |  |                         |  |  |  |  |  |  |
|         |                        |                      |          |          | 35   | 27   | 37.3107  | 27.0000  |                                                                |  |  |  |                         |  |  |  |  |  |  |
| FN0739  | -0.219                 | 14.903               | 1.404e-1 | 1.64e-1  | 125  | 144  | 182.5744 | 187.4328 | AAL94935.1  Formiminotetrahydrofolate cyclodeaminase           |  |  |  |                         |  |  |  |  |  |  |
|         |                        |                      |          |          | 183  | 137  | 195.0815 | 137.0000 |                                                                |  |  |  |                         |  |  |  |  |  |  |
| FN0740  | 0.658                  | 18.227               | 1.348e-1 | 1.506e-1 | 147  | 625  | 214.7075 | 813.5104 | AAL94936.1  Imidazolonepropionase                              |  |  |  |                         |  |  |  |  |  |  |
|         |                        |                      |          |          | 626  | 578  | 667.3281 | 578.0000 |                                                                |  |  |  |                         |  |  |  |  |  |  |
| FN0741  | 0.216                  | 18.432               | 3.115e-1 | 5.908e-1 | 206  | 551  | 300.8827 | 717.1907 | AAL94937.1  Glutamate formiminotransferase                     |  |  |  |                         |  |  |  |  |  |  |
|         |                        |                      |          |          | 753  | 565  | 802.7125 | 565.0000 |                                                                |  |  |  |                         |  |  |  |  |  |  |
| FN0742  | -0.176                 | 11.674               |          |          |      | 35   |          | 45.5566  | AAL94938.1  unknown                                            |  |  |  |                         |  |  |  |  |  |  |
|         |                        |                      |          |          | 57   | 62   | 60.7631  | 62.0000  |                                                                |  |  |  |                         |  |  |  |  |  |  |
| FN0743  |                        |                      |          |          |      | 3    |          | 3.9048   | AAL94939.1  ATP-dependent helicase, DinG family                |  |  |  |                         |  |  |  |  |  |  |
|         |                        |                      |          |          |      | 6    |          | 6.0000   |                                                                |  |  |  |                         |  |  |  |  |  |  |
| FN0745  | 0.700                  | 14.439               | 1.084e-1 | 9.875e-2 | 47   | 179  | 68.6480  | 232.9894 | AAL94941.1  metal dependent phosphohydrolase                   |  |  |  |                         |  |  |  |  |  |  |
|         |                        |                      |          |          | 155  | 147  | 165.2330 | 147.0000 |                                                                |  |  |  |                         |  |  |  |  |  |  |
| FN0746  | -0.231                 | 7.795                | 3.577e-1 | 7.271e-1 | 17   | 5    | 24.8301  | 6.5081   | AAL94942.1  Hypothetical Metal-Binding Protein                 |  |  |  |                         |  |  |  |  |  |  |
|         |                        |                      |          |          | 7    | 21   | 7.4621   | 21.0000  |                                                                |  |  |  |                         |  |  |  |  |  |  |
| FN0750  | 1.496                  | 10.329               | 3.169e-3 | 2.864e-4 | 11   | 48   | 16.0666  | 62.4776  | AAL94946.1  Hypothetical protein                               |  |  |  |                         |  |  |  |  |  |  |
|         |                        |                      |          |          | 25   | 58   | 26.6505  | 58.0000  |                                                                |  |  |  |                         |  |  |  |  |  |  |
| FN0751  | 0.864                  | 9.045                | 4.183e-2 | 1.629e-2 | 8    | 20   | 11.6848  | 26.0323  | AAL94947.1  L-asparaginase I                                   |  |  |  |                         |  |  |  |  |  |  |
|         |                        |                      |          |          | 21   | 36   | 22.3864  | 36.0000  |                                                                |  |  |  |                         |  |  |  |  |  |  |
| FN0752  | 0.512                  | 8.460                | 2.058e-1 | 3.26e-1  | 4    | 16   | 5.8424   | 20.8259  | AAL94948.1  Proline iminopeptidase                             |  |  |  |                         |  |  |  |  |  |  |
|         |                        |                      |          |          | 24   | 24   | 25.5845  | 24.0000  |                                                                |  |  |  |                         |  |  |  |  |  |  |
| FN0753  | -0.738                 | 12.667               | 7.267e-4 | 1.671e-5 | 74   | 46   | 108.0841 | 59.8744  | AAL94949.1  Glutamyl-tRNA(Gln) amidotransferase subunit B      |  |  |  |                         |  |  |  |  |  |  |
|         |                        |                      |          |          | 94   | 65   | 100.2058 | 65.0000  |                                                                |  |  |  |                         |  |  |  |  |  |  |
| FN0754  | -0.254                 | 13.528               | 2.054e-1 | 3.252e-1 | 64   | 63   | 93.4781  | 82.0018  | AAL94950.1  Glutamyl-tRNA(Gln) amidotransferase subunit A      |  |  |  |                         |  |  |  |  |  |  |
|         |                        |                      |          |          | 135  | 117  | 143.9126 | 117.0000 |                                                                |  |  |  |                         |  |  |  |  |  |  |
| FN0755  | -0.064                 | 10.115               | 2.386e-1 | 4.074e-1 | 24   | 27   | 35.0543  | 35.1436  | AAL94951.1  Glutamyl-tRNA(Gln) amidotransferase subunit C      |  |  |  |                         |  |  |  |  |  |  |
|         |                        |                      |          |          | 31   | 30   | 33.0466  | 30.0000  |                                                                |  |  |  |                         |  |  |  |  |  |  |
| FN0758  | 0.513                  | 15.076               | 8.518e-2 | 6.162e-2 | 97   | 202  | 141.6778 | 262.9265 | AAL94954.1  Rod shape-determining protein mreB                 |  |  |  |                         |  |  |  |  |  |  |
|         |                        |                      |          |          | 159  | 181  | 169.4971 | 181.0000 |                                                                |  |  |  |                         |  |  |  |  |  |  |
| FN0761  | -1.076                 | 9.604                |          |          |      | 18   |          | 23.4291  | AAL94957.1  Bvg accessory factor                               |  |  |  |                         |  |  |  |  |  |  |
|         |                        |                      |          |          | 38   | 15   | 40.5087  | 15.0000  |                                                                |  |  |  |                         |  |  |  |  |  |  |

Show detected proteins only  
 Show all proteins  
 Filter by category:

Proteins found: 1313

Enter (or paste) list of ORFs

Find ORFs

Test Cutoff

q-Value p-Value

.005

| Signif | Direction | Applies To   |
|--------|-----------|--------------|
| yes    | +         | ratios, bars |
| no     | n/a       | bars         |
| yes    | -         | ratios, bars |
| yes    | +         | p-, q-Values |
| yes    | -         | p-, q-Values |

Dot Plots Dot Plots

Fn Summary Table FnPg vs Fn FnSg vs Fn FnPgSg vs Fn FnPgSg vs FnPg FnSg vs FnPg FnPgSg vs FnSg Fn Coverage

| Protein       | FnSg vs FnPg           |                      |          |          | Raw  |      |           |           | Normalized                                                                 |      |      |        | Description                                                   | Log <sub>2</sub> Ratios |    |    |   |   |   |   |  |  |  |
|---------------|------------------------|----------------------|----------|----------|------|------|-----------|-----------|----------------------------------------------------------------------------|------|------|--------|---------------------------------------------------------------|-------------------------|----|----|---|---|---|---|--|--|--|
|               | Log <sub>2</sub> Ratio | Log <sub>2</sub> Sum | q-Value  | p-Value  | FnPg | FnSg | FnPg      | FnSg      | FnPg                                                                       | FnSg | FnPg | FnSg   |                                                               |                         |    |    |   |   |   |   |  |  |  |
|               |                        |                      |          |          |      |      |           |           |                                                                            |      |      |        |                                                               | -6                      | -4 | -2 | 0 | 2 | 4 | 6 |  |  |  |
| <b>FN0765</b> | -1.315                 | 4.485                |          |          | 7    | 3    | 7.4621    | 3.0000    | AAL94961.1  tRNA (5-methylaminomethyl -2-thiouridylate) -methyltransferase |      |      |        |                                                               |                         |    |    |   |   |   |   |  |  |  |
| <b>FN0768</b> |                        |                      |          |          | 4    |      | 4.2641    |           | AAL94964.1  Hemin receptor                                                 |      |      |        |                                                               |                         |    |    |   |   |   |   |  |  |  |
| <b>FN0771</b> |                        |                      |          |          |      | 3    |           | 3.9048    |                                                                            | 7    |      | 7.0000 | AAL94967.1  Oxygen-independent coproporphyrinogen III oxidase |                         |    |    |   |   |   |   |  |  |  |
| <b>FN0774</b> | -1.602                 | 10.676               | 4.351e-2 | 1.752e-2 | 60   | 18   | 87.6357   | 23.4291   | AAL94970.1  Hypothetical cytosolic protein                                 |      |      |        |                                                               |                         |    |    |   |   |   |   |  |  |  |
| <b>FN0775</b> | -0.126                 | 16.431               | 3.637e-1 | 7.462e-1 | 126  | 229  | 184.0350  | 298.0702  | AAL94971.1  Aspartyl aminopeptidase                                        |      |      |        |                                                               |                         |    |    |   |   |   |   |  |  |  |
| <b>FN0776</b> | 0.545                  | 13.004               | 2.901e-3 | 2.384e-4 | 48   | 86   | 70.1086   | 111.9390  | AAL94972.1  Aspartate-ammonia ligase                                       |      |      |        |                                                               |                         |    |    |   |   |   |   |  |  |  |
| <b>FN0777</b> | 0.754                  | 11.881               | 1.469e-2 | 2.998e-3 | 29   | 68   | 42.3573   | 88.5099   | AAL94973.1  GTP-binding protein lepA                                       |      |      |        |                                                               |                         |    |    |   |   |   |   |  |  |  |
| <b>FN0778</b> | 0.571                  | 8.742                | 1.696e-1 | 2.373e-1 | 5    | 18   | 7.3030    | 23.4291   | AAL94974.1  Methyltransferase                                              |      |      |        |                                                               |                         |    |    |   |   |   |   |  |  |  |
| <b>FN0779</b> | 0.819                  | 5.648                |          |          |      | 6    |           | 7.8097    | AAL94975.1  Putative GTPases (G3E family)                                  |      |      |        |                                                               |                         |    |    |   |   |   |   |  |  |  |
| <b>FN0783</b> | -0.310                 | 23.073               | 8.181e-2 | 5.661e-2 | 2527 | 1871 | 3690.9248 | 2435.3246 | AAL94979.1  acyl-CoA dehydrogenase                                         |      |      |        |                                                               |                         |    |    |   |   |   |   |  |  |  |
| <b>FN0784</b> | -0.025                 | 22.273               | 4.104e-1 | 9.089e-1 | 1903 | 1910 | 2779.5132 | 2486.0876 | AAL94980.1  Electron transfer flavoprotein beta-subunit                    |      |      |        |                                                               |                         |    |    |   |   |   |   |  |  |  |
| <b>FN0785</b> | -0.085                 | 21.951               | 2.939e-1 | 5.434e-1 | 1553 | 1307 | 2268.3048 | 1701.2128 | AAL94981.1  Electron transfer flavoprotein alpha-subunit                   |      |      |        |                                                               |                         |    |    |   |   |   |   |  |  |  |
| <b>FN0788</b> | -0.113                 | 10.128               | 2.482e-1 | 4.307e-1 | 25   | 21   | 36.5149   | 27.3339   | AAL94984.1  unknown                                                        |      |      |        |                                                               |                         |    |    |   |   |   |   |  |  |  |
| <b>FN0790</b> | 0.937                  | 6.318                | 3.515e-2 | 1.213e-2 | 3    | 9    | 4.3818    | 11.7145   | AAL94986.1  Xylose repressor                                               |      |      |        |                                                               |                         |    |    |   |   |   |   |  |  |  |
| <b>FN0791</b> | -0.105                 | 18.471               | 3.015e-1 | 5.636e-1 | 367  | 513  | 536.0385  | 667.7293  | AAL94987.1  Histidine ammonia-lyase                                        |      |      |        |                                                               |                         |    |    |   |   |   |   |  |  |  |
| <b>FN0792</b> | 0.197                  | 20.863               | 2.865e-1 | 5.241e-1 | 573  | 1095 | 836.9212  | 1425.2701 | AAL94988.1  Urocanate hydratase                                            |      |      |        |                                                               |                         |    |    |   |   |   |   |  |  |  |

Show detected proteins only  
 Show all proteins  
 Filter by category:

Proteins found:  
1313

Test Cutoff

| Signif | Direction | Applies To   |
|--------|-----------|--------------|
| yes    | +         | ratios, bars |
| no     | n/a       | bars         |
| yes    | -         | ratios, bars |
| yes    | +         | p-, q-Values |
| yes    | -         |              |

Fn Summary Table FnPg vs Fn FnSg vs Fn FnPgSg vs Fn FnPgSg vs FnPg FnSg vs FnPg FnPgSg vs FnSg Fn Coverage

| Protein       | FnSg vs FnPg           |                      |          |          | Raw  |      | Normalized |          | Description                                               | Log <sub>2</sub> Ratios |    |    |   |   |   |   |
|---------------|------------------------|----------------------|----------|----------|------|------|------------|----------|-----------------------------------------------------------|-------------------------|----|----|---|---|---|---|
|               | Log <sub>2</sub> Ratio | Log <sub>2</sub> Sum | q-Value  | p-Value  | FnPg | FnSg | FnPg       | FnSg     |                                                           | -6                      | -4 | -2 | 0 | 2 | 4 | 6 |
| <b>FN0793</b> |                        |                      |          |          | 12   |      | 12.7922    |          | AAL94989.1  Sodium/glutamate symport carrier protein      |                         |    |    |   |   |   |   |
| <b>FN0794</b> | 0.547                  | 8.545                |          |          | 15   | 19   | 15.9903    | 24.7307  | AAL94990.1  Hypothetical protein                          |                         |    |    |   |   |   |   |
| <b>FN0796</b> | -0.052                 | 15.039               | 3.704e-1 | 7.68e-1  | 104  | 144  | 151.9019   | 187.4328 | AAL94992.1  Pyruvate,phosphate dikinase                   |                         |    |    |   |   |   |   |
| <b>FN0798</b> | 1.523                  | 8.750                | 1.185e-1 | 1.167e-1 | 8    | 41   | 11.6848    | 53.3663  | AAL94994.1  Fructose-1,6-bisphosphatase                   |                         |    |    |   |   |   |   |
| <b>FN0799</b> | 0.025                  | 8.992                | 4.223e-1 | 9.542e-1 | 8    | 15   | 11.6848    | 19.5242  | AAL94995.1  Isoamylase                                    |                         |    |    |   |   |   |   |
| <b>FN0800</b> | 0.336                  | 10.731               | 3.194e-1 | 6.127e-1 | 5    | 32   | 7.3030     | 41.6517  | AAL94996.1  Amino acid-binding protein                    |                         |    |    |   |   |   |   |
| <b>FN0801</b> | 0.243                  | 8.768                |          |          | 18   | 18   | 19.1883    | 23.4291  | AAL94997.1  Amino acid transport ATP-binding protein      |                         |    |    |   |   |   |   |
| <b>FN0802</b> |                        |                      |          |          | 6    |      | 6.3961     |          | AAL94998.1  Amino acid transport system permease protein  |                         |    |    |   |   |   |   |
| <b>FN0803</b> | -0.571                 | 11.124               | 6.377e-2 | 3.49e-2  | 46   | 25   | 67.1874    | 32.5404  | AAL94999.1  Cytochrome C-TYPE biogenesis protein ccdA     |                         |    |    |   |   |   |   |
| <b>FN0805</b> | -0.132                 | 7.675                | 1.304e-1 | 1.407e-1 | 11   | 11   | 16.0666    | 14.3178  | AAL95001.1  Hypothetical protein                          |                         |    |    |   |   |   |   |
| <b>FN0806</b> | 0.123                  | 12.367               | 1.288e-1 | 1.374e-1 | 45   | 62   | 65.7268    | 80.7002  | AAL95002.1  SpoIID homolog                                |                         |    |    |   |   |   |   |
| <b>FN0807</b> | -1.344                 | 9.052                | 1.066e-3 | 3.371e-5 | 24   | 13   | 35.0543    | 16.9210  | AAL95003.1  3-deoxy-manno-octulosonate cytidyltransferase |                         |    |    |   |   |   |   |
| <b>FN0808</b> | 0.115                  | 12.609               | 2.173e-1 | 3.531e-1 | 58   | 68   | 84.7145    | 88.5099  | AAL95004.1  Phosphoglycerate mutase                       |                         |    |    |   |   |   |   |
| <b>FN0809</b> | 0.908                  | 7.092                |          |          | 8    | 16   | 8.5282     | 16.0000  | AAL95005.1  23S rRNA methyltransferase                    |                         |    |    |   |   |   |   |
| <b>FN0810</b> | 0.068                  | 11.832               | 4.141e-1 | 9.228e-1 | 45   | 12   | 65.7268    | 15.6194  | AAL95006.1  Low-specificity threonine aldolase            |                         |    |    |   |   |   |   |
| <b>FN0811</b> |                        |                      |          |          |      | 4    |            | 5.2065   | AAL95007.1  Hypothetical protein                          |                         |    |    |   |   |   |   |
|               |                        |                      |          |          |      | 5    |            | 5.0000   |                                                           |                         |    |    |   |   |   |   |

Show detected proteins only  
 Show all proteins  
 Filter by category:

Proteins found: 1313

Enter (or paste) list of ORFs

Find ORFs

Test Cutoff

q-Value p-Value

.005

| Signif | Direction | Applies To   |
|--------|-----------|--------------|
| yes    | +         | ratios, bars |
| no     | n/a       | bars         |
| yes    | -         | ratios, bars |
| yes    | +         | p-, q-Values |
| yes    | -         | p-, q-Values |

Dot Plots Dot Plots

Fn Summary Table FnPg vs Fn FnSg vs Fn FnPgSg vs Fn FnPgSg vs FnPg FnSg vs FnPg FnPgSg vs FnSg Fn Coverage

| Protein | FnSg vs FnPg           |                      |          |          | Raw  |      |          |          | Normalized                                          |      |      |      | Description | Log <sub>2</sub> Ratios |    |    |   |   |   |   |
|---------|------------------------|----------------------|----------|----------|------|------|----------|----------|-----------------------------------------------------|------|------|------|-------------|-------------------------|----|----|---|---|---|---|
|         | Log <sub>2</sub> Ratio | Log <sub>2</sub> Sum | q-Value  | p-Value  | FnPg | FnSg | FnPg     | FnSg     | FnPg                                                | FnSg | FnPg | FnSg |             | -6                      | -4 | -2 | 0 | 2 | 4 | 6 |
| FN0813  | 0.526                  | 11.354               |          |          |      | 49   |          | 63.7792  | AAL95009.1  Transcriptional regulator, TetR family  |      |      |      |             |                         |    |    |   |   |   |   |
|         |                        |                      |          |          | 40   | 59   | 42.6408  | 59.0000  |                                                     |      |      |      |             |                         |    |    |   |   |   |   |
| FN0814  | -0.998                 | 8.654                | 1.97e-1  | 3.062e-1 | 33   | 8    | 48.1997  | 10.4129  | AAL95010.1  Propionate CoA-transferase              |      |      |      |             |                         |    |    |   |   |   |   |
|         |                        |                      |          |          | 8    | 18   | 8.5282   | 18.0000  |                                                     |      |      |      |             |                         |    |    |   |   |   |   |
| FN0816  |                        |                      |          |          | 40   |      | 58.4238  |          | AAL95012.1  dehydrogenase with MaoC-like domain     |      |      |      |             |                         |    |    |   |   |   |   |
|         |                        |                      |          |          |      |      |          |          |                                                     |      |      |      |             |                         |    |    |   |   |   |   |
| FN0818  | -1.239                 | 17.242               | 9.136e-2 | 7.177e-2 | 567  | 224  | 828.1576 | 291.5621 | AAL95014.1  DNA-binding protein HU                  |      |      |      |             |                         |    |    |   |   |   |   |
|         |                        |                      |          |          | 358  | 221  | 381.6349 | 221.0000 |                                                     |      |      |      |             |                         |    |    |   |   |   |   |
| FN0819  | 0.016                  | 11.585               | 4.201e-1 | 9.459e-1 | 47   | 38   | 68.6480  | 49.4614  | AAL95015.1  Tetratricopeptide repeat family protein |      |      |      |             |                         |    |    |   |   |   |   |
|         |                        |                      |          |          | 39   | 62   | 41.5748  | 62.0000  |                                                     |      |      |      |             |                         |    |    |   |   |   |   |
| FN0820  | -0.228                 | 14.652               | 2.305e-1 | 3.862e-1 | 94   | 91   | 137.2960 | 118.4471 | AAL95016.1  Mercuric reductase                      |      |      |      |             |                         |    |    |   |   |   |   |
|         |                        |                      |          |          | 197  | 178  | 210.0058 | 178.0000 |                                                     |      |      |      |             |                         |    |    |   |   |   |   |
| FN0821  | -1.605                 | 11.407               | 1.204e-1 | 1.202e-1 | 96   | 29   | 140.2172 | 37.7469  | AAL95017.1  Hypothetical protein                    |      |      |      |             |                         |    |    |   |   |   |   |
|         |                        |                      |          |          | 39   | 22   | 41.5748  | 22.0000  |                                                     |      |      |      |             |                         |    |    |   |   |   |   |
| FN0823  | 1.308                  | 12.200               | 8.822e-3 | 1.439e-3 | 21   | 79   | 30.6725  | 102.8277 | AAL95019.1  GTP-binding protein hflX                |      |      |      |             |                         |    |    |   |   |   |   |
|         |                        |                      |          |          | 53   | 113  | 56.4990  | 113.0000 |                                                     |      |      |      |             |                         |    |    |   |   |   |   |
| FN0824  |                        |                      |          |          |      | 4    |          | 5.2065   | AAL95020.1  hypothetical cytosolic protein          |      |      |      |             |                         |    |    |   |   |   |   |
|         |                        |                      |          |          |      |      |          |          |                                                     |      |      |      |             |                         |    |    |   |   |   |   |
| FN0825  | -0.782                 | 10.524               | 1.472e-1 | 1.822e-1 | 20   | 25   | 29.2119  | 32.5404  | AAL95021.1  Hypothetical cytosolic protein          |      |      |      |             |                         |    |    |   |   |   |   |
|         |                        |                      |          |          | 67   | 26   | 71.4233  | 26.0000  |                                                     |      |      |      |             |                         |    |    |   |   |   |   |
| FN0826  | 0.340                  | 8.158                | 2.634e-1 | 4.668e-1 | 14   | 20   | 20.4483  | 26.0323  | AAL95022.1  periplasmic component of efflux system  |      |      |      |             |                         |    |    |   |   |   |   |
|         |                        |                      |          |          | 9    | 12   | 9.5942   | 12.0000  |                                                     |      |      |      |             |                         |    |    |   |   |   |   |
| FN0827  | 1.573                  | 9.040                | 6.343e-3 | 8.378e-4 | 8    | 27   | 11.6848  | 35.1436  | AAL95023.1  ABC transporter ATP-binding protein     |      |      |      |             |                         |    |    |   |   |   |   |
|         |                        |                      |          |          | 14   | 44   | 14.9243  | 44.0000  |                                                     |      |      |      |             |                         |    |    |   |   |   |   |
| FN0828  |                        |                      |          |          |      | 6    |          | 7.8097   | AAL95024.1  ABC transporter permease protein        |      |      |      |             |                         |    |    |   |   |   |   |
|         |                        |                      |          |          |      | 4    |          | 4.0000   |                                                     |      |      |      |             |                         |    |    |   |   |   |   |
| FN0830  | 0.165                  | 12.616               | 1.271e-1 | 1.338e-1 | 55   | 59   | 80.3328  | 76.7954  | AAL95026.1  Hypothetical protein                    |      |      |      |             |                         |    |    |   |   |   |   |
|         |                        |                      |          |          | 65   | 91   | 69.2913  | 91.0000  |                                                     |      |      |      |             |                         |    |    |   |   |   |   |
| FN0831  |                        |                      |          |          | 13   |      | 18.9877  |          | AAL95027.1  Hemin receptor                          |      |      |      |             |                         |    |    |   |   |   |   |
|         |                        |                      |          |          | 6    |      | 6.3961   |          |                                                     |      |      |      |             |                         |    |    |   |   |   |   |
| FN0832  | -1.597                 | 11.335               | 1.593e-1 | 2.126e-1 | 105  | 18   | 153.3625 | 23.4291  | AAL95028.1  Hypothetical protein                    |      |      |      |             |                         |    |    |   |   |   |   |
|         |                        |                      |          |          | 22   | 35   | 23.4524  | 35.0000  |                                                     |      |      |      |             |                         |    |    |   |   |   |   |

Show detected proteins only  
 Show all proteins  
 Filter by category:

Proteins found: 1313

Test Cutoff

| Signif      | Direction | Applies To |
|-------------|-----------|------------|
| red         | yes       | +          |
| yellow      | no        | n/a        |
| green       | yes       | -          |
| pink        | yes       | +          |
| light green | yes       | -          |

Applies To: ratios, bars; ratios, bars; p-, q-Values



Fn Summary Table FnPg vs Fn FnSg vs Fn FnPgSg vs Fn FnPgSg vs FnPg FnSg vs FnPg FnPgSg vs FnSg Fn Coverage

| Protein | FnSg vs FnPg           |                      |          |          | Raw  |      |          |          | Normalized |      |      |      | Description                                          | Log <sub>2</sub> Ratios |    |    |   |   |   |   |
|---------|------------------------|----------------------|----------|----------|------|------|----------|----------|------------|------|------|------|------------------------------------------------------|-------------------------|----|----|---|---|---|---|
|         | Log <sub>2</sub> Ratio | Log <sub>2</sub> Sum | q-Value  | p-Value  | FnPg | FnSg | FnPg     | FnSg     | FnPg       | FnSg | FnPg | FnSg |                                                      |                         |    |    |   |   |   |   |
|         |                        |                      |          |          |      |      |          |          |            |      |      |      |                                                      | -6                      | -4 | -2 | 0 | 2 | 4 | 6 |
| FN0833  | 2.462                  | 7.291                |          |          |      | 29   |          | 37.7469  |            |      |      |      | AAL95029.1   Hypothetical protein                    |                         |    |    |   |   |   |   |
|         |                        |                      |          |          |      | 5    | 21       | 5.3301   | 21.0000    |      |      |      |                                                      |                         |    |    |   |   |   |   |
| FN0834  | -1.275                 | 8.610                | 1.84e-1  | 2.724e-1 | 37   | 8    | 54.0420  | 10.4129  |            |      |      |      | AAL95030.1   Hypothetical Exported Protein           |                         |    |    |   |   |   |   |
|         |                        |                      |          |          |      | 7    | 15       | 7.4621   | 15.0000    |      |      |      |                                                      |                         |    |    |   |   |   |   |
| FN0835  |                        |                      |          |          | 27   |      | 39.4361  |          |            |      |      |      | AAL95031.1   Hypothetical protein                    |                         |    |    |   |   |   |   |
|         |                        |                      |          |          |      | 4    |          | 4.2641   |            |      |      |      |                                                      |                         |    |    |   |   |   |   |
| FN0836  | -1.130                 | 9.002                | 1.078e-1 | 9.769e-2 | 32   | 12   | 46.7391  | 15.6194  |            |      |      |      | AAL95032.1   Hypothetical protein                    |                         |    |    |   |   |   |   |
|         |                        |                      |          |          |      | 19   | 15       | 20.2544  | 15.0000    |      |      |      |                                                      |                         |    |    |   |   |   |   |
| FN0837  |                        |                      |          |          |      |      |          |          |            |      |      |      | AAL95033.1   Integrase/recombinase                   |                         |    |    |   |   |   |   |
|         |                        |                      |          |          |      |      | 8        |          | 8.0000     |      |      |      |                                                      |                         |    |    |   |   |   |   |
| FN0846  | -0.348                 | 13.288               | 3.225e-2 | 1.035e-2 | 83   | 74   | 121.2294 | 96.3196  |            |      |      |      | AAL95042.1   Hypothetical Exported Protein           |                         |    |    |   |   |   |   |
|         |                        |                      |          |          |      | 98   | 81       | 104.4699 | 81.0000    |      |      |      |                                                      |                         |    |    |   |   |   |   |
| FN0847  | 0.475                  | 6.660                |          |          |      | 9    |          | 11.7145  |            |      |      |      | AAL95043.1   TPR-repeat-containing proteins          |                         |    |    |   |   |   |   |
|         |                        |                      |          |          |      | 8    | 12       | 8.5282   | 12.0000    |      |      |      |                                                      |                         |    |    |   |   |   |   |
| FN0848  |                        |                      |          |          | 5    |      | 7.3030   |          |            |      |      |      | AAL95044.1   Hypothetical protein                    |                         |    |    |   |   |   |   |
|         |                        |                      |          |          |      |      |          |          |            |      |      |      |                                                      |                         |    |    |   |   |   |   |
| FN0849  | -0.199                 | 11.782               | 7.91e-2  | 5.276e-2 | 44   | 39   | 64.2662  | 50.7630  |            |      |      |      | AAL95045.1   8-amino-7-oxononanoate synthase         |                         |    |    |   |   |   |   |
|         |                        |                      |          |          |      | 59   | 60       | 62.8951  | 60.0000    |      |      |      |                                                      |                         |    |    |   |   |   |   |
| FN0850  | 0.764                  | 10.380               | 3.355e-2 | 1.111e-2 | 15   | 37   | 21.9089  | 48.1598  |            |      |      |      | AAL95046.1   Hypothetical cytosolic protein          |                         |    |    |   |   |   |   |
|         |                        |                      |          |          |      | 32   | 47       | 34.1126  | 47.0000    |      |      |      |                                                      |                         |    |    |   |   |   |   |
| FN0853  | -0.045                 | 13.711               | 3.647e-1 | 7.496e-1 | 91   | 96   | 132.9142 | 124.9552 |            |      |      |      | AAL95049.1   Glycogen synthase                       |                         |    |    |   |   |   |   |
|         |                        |                      |          |          |      | 96   | 103      | 102.3379 | 103.0000   |      |      |      |                                                      |                         |    |    |   |   |   |   |
| FN0854  | -0.137                 | 14.775               | 2.379e-1 | 4.056e-1 | 139  | 114  | 203.0228 | 148.3843 |            |      |      |      | AAL95050.1   Glucose-1-phosphate adenylyltransferase |                         |    |    |   |   |   |   |
|         |                        |                      |          |          |      | 139  | 171      | 148.1767 | 171.0000   |      |      |      |                                                      |                         |    |    |   |   |   |   |
| FN0855  | 0.616                  | 15.846               | 5.671e-2 | 2.86e-2  | 102  | 238  | 148.9807 | 309.7847 |            |      |      |      | AAL95051.1   Glucose-1-phosphate adenylyltransferase |                         |    |    |   |   |   |   |
|         |                        |                      |          |          |      | 228  | 291      | 243.0524 | 291.0000   |      |      |      |                                                      |                         |    |    |   |   |   |   |
| FN0856  | -0.253                 | 14.724               | 4.334e-2 | 1.739e-2 | 124  | 124  | 181.1138 | 161.4005 |            |      |      |      | AAL95052.1   1,4-alpha-glucan branching enzyme       |                         |    |    |   |   |   |   |
|         |                        |                      |          |          |      | 167  | 140      | 178.0252 | 140.0000   |      |      |      |                                                      |                         |    |    |   |   |   |   |
| FN0857  | 0.426                  | 16.750               | 8.631e-2 | 6.341e-2 | 155  | 304  | 226.3923 | 395.6914 |            |      |      |      | AAL95053.1   Glycogen phosphorylase                  |                         |    |    |   |   |   |   |
|         |                        |                      |          |          |      | 325  | 374      | 346.4563 | 374.0000   |      |      |      |                                                      |                         |    |    |   |   |   |   |
| FN0858  | 0.125                  | 11.791               | 3.54e-1  | 7.155e-1 | 35   | 31   | 51.1208  | 40.3501  |            |      |      |      | AAL95054.1   4-alpha-glucanotransferase              |                         |    |    |   |   |   |   |
|         |                        |                      |          |          |      | 59   | 84       | 62.8951  | 84.0000    |      |      |      |                                                      |                         |    |    |   |   |   |   |

Show detected proteins only  
 Show all proteins  
 Filter by category:

Proteins found: 1313

Enter (or paste) list of ORFs

Find ORFs

Test Cutoff

q-Value p-Value

.005

| Signif | Direction | Applies To   |
|--------|-----------|--------------|
| yes    | +         | ratios, bars |
| no     | n/a       | bars         |
| yes    | -         | ratios, bars |
| yes    | +         | p-, q-Values |
| yes    | -         | p-, q-Values |

Dot Plots Dot Plots

Fn Summary Table FnPg vs Fn FnSg vs Fn FnPgSg vs Fn FnPgSg vs FnPg FnSg vs FnPg FnPgSg vs FnSg Fn Coverage

| Protein | FnSg vs FnPg           |                      |          |          | Raw  |      | Normalized |          | Description                                              | Log <sub>2</sub> Ratios |    |    |   |   |   |   |
|---------|------------------------|----------------------|----------|----------|------|------|------------|----------|----------------------------------------------------------|-------------------------|----|----|---|---|---|---|
|         | Log <sub>2</sub> Ratio | Log <sub>2</sub> Sum | q-Value  | p-Value  | FnPg | FnSg | FnPg       | FnSg     |                                                          | -6                      | -4 | -2 | 0 | 2 | 4 | 6 |
| FN0865  | 0.081                  | 15.415               | 4.125e-1 | 9.168e-1 | 17   | 172  | 24.8301    | 223.8780 | AAL95061.1  unknown                                      |                         |    |    |   |   |   |   |
|         |                        |                      |          |          | 358  | 206  | 381.6349   | 206.0000 |                                                          |                         |    |    |   |   |   |   |
| FN0867  | 0.670                  | 10.938               | 2.326e-2 | 5.917e-3 | 24   | 39   | 35.0543    | 50.7630  | AAL95063.1  Long-chain-fatty-acid--CoA ligase            |                         |    |    |   |   |   |   |
|         |                        |                      |          |          | 33   | 61   | 35.1786    | 61.0000  |                                                          |                         |    |    |   |   |   |   |
| FN0868  |                        |                      |          |          |      |      |            |          | AAL95064.1  ATPases of the PP superfamily                |                         |    |    |   |   |   |   |
|         |                        |                      |          |          |      | 8    |            | 8.0000   |                                                          |                         |    |    |   |   |   |   |
| FN0869  | 0.953                  | 5.137                |          |          |      | 5    |            | 6.5081   | AAL95065.1  Hydrolase (HAD superfamily)                  |                         |    |    |   |   |   |   |
|         |                        |                      |          |          | 4    | 10   | 4.2641     | 10.0000  |                                                          |                         |    |    |   |   |   |   |
| FN0871  | -0.713                 | 7.471                |          |          |      | 6    |            | 7.8097   | AAL95067.1  3-dehydroquinase synthase                    |                         |    |    |   |   |   |   |
|         |                        |                      |          |          | 16   | 13   | 17.0563    | 13.0000  |                                                          |                         |    |    |   |   |   |   |
| FN0873  | -0.259                 | 11.850               | 3.409e-1 | 6.754e-1 | 18   | 50   | 26.2907    | 65.0808  | AAL95069.1  Protease IV                                  |                         |    |    |   |   |   |   |
|         |                        |                      |          |          | 100  | 46   | 106.6019   | 46.0000  |                                                          |                         |    |    |   |   |   |   |
| FN0874  | -1.230                 | 5.874                |          |          |      |      |            |          | AAL95070.1  Phosphohydrolase (MUTT/NUDIX family protein) |                         |    |    |   |   |   |   |
|         |                        |                      |          |          | 11   | 5    | 11.7262    | 5.0000   |                                                          |                         |    |    |   |   |   |   |
| FN0875  |                        |                      |          |          |      | 6    |            | 7.8097   | AAL95071.1  23S rRNA methyltransferase                   |                         |    |    |   |   |   |   |
|         |                        |                      |          |          |      |      |            |          |                                                          |                         |    |    |   |   |   |   |
| FN0878  | 0.937                  | 8.392                | 6.663e-2 | 3.776e-2 | 5    | 19   | 7.3030     | 24.7307  | AAL95074.1  Transcriptional regulator, GntR family       |                         |    |    |   |   |   |   |
|         |                        |                      |          |          | 18   | 26   | 19.1883    | 26.0000  |                                                          |                         |    |    |   |   |   |   |
| FN0884  |                        |                      |          |          |      | 3    |            | 3.9048   | AAL95079.1  Hemin transport system permease protein hmuU |                         |    |    |   |   |   |   |
|         |                        |                      |          |          |      |      |            |          |                                                          |                         |    |    |   |   |   |   |
| FN0887  | 0.209                  | 10.204               | 2.359e-1 | 4.001e-1 | 16   | 26   | 23.3695    | 33.8420  | AAL95083.1  Oligoendopeptidase F                         |                         |    |    |   |   |   |   |
|         |                        |                      |          |          | 38   | 40   | 40.5087    | 40.0000  |                                                          |                         |    |    |   |   |   |   |
| FN0888  |                        |                      |          |          | 15   |      | 21.9089    |          | AAL95084.1  Uracil permease                              |                         |    |    |   |   |   |   |
|         |                        |                      |          |          | 14   |      | 14.9243    |          |                                                          |                         |    |    |   |   |   |   |
| FN0889  | -1.822                 | 8.162                |          |          | 37   |      | 54.0420    |          | AAL95085.1  hypothetical protein                         |                         |    |    |   |   |   |   |
|         |                        |                      |          |          | 9    | 9    | 9.5942     | 9.0000   |                                                          |                         |    |    |   |   |   |   |
| FN0892  |                        |                      |          |          |      | 10   |            | 13.0162  | AAL95088.1  Phosphoserine phosphatase                    |                         |    |    |   |   |   |   |
|         |                        |                      |          |          |      | 5    |            | 5.0000   |                                                          |                         |    |    |   |   |   |   |
| FN0893  | 0.908                  | 6.707                |          |          |      |      |            |          | AAL95089.1  Hypothetical protein                         |                         |    |    |   |   |   |   |
|         |                        |                      |          |          | 7    | 14   | 7.4621     | 14.0000  |                                                          |                         |    |    |   |   |   |   |
| FN0896  | -0.444                 | 7.378                | 2.198e-1 | 3.593e-1 | 6    | 7    | 8.7636     | 9.1113   | AAL95092.1  Hypothetical protein                         |                         |    |    |   |   |   |   |
|         |                        |                      |          |          | 20   | 13   | 21.3204    | 13.0000  |                                                          |                         |    |    |   |   |   |   |

Show detected proteins only  
 Show all proteins  
 Filter by category:

Proteins found: 1313

Test Cutoff

| Signif | Direction | Applies To   |
|--------|-----------|--------------|
| yes    | +         | ratios, bars |
| no     | n/a       | bars         |
| yes    | -         | ratios, bars |
| yes    | +         | p-, q-Values |
| yes    | -         |              |

Fn Summary Table FnPg vs Fn FnSg vs Fn FnPgSg vs Fn FnPgSg vs FnPg FnSg vs FnPg FnPgSg vs FnSg Fn Coverage

| Protein | FnSg vs FnPg           |                      |          |          | Raw  |      | Normalized |                                       | Description                                                                        | Log <sub>2</sub> Ratios |    |    |    |   |   |   |
|---------|------------------------|----------------------|----------|----------|------|------|------------|---------------------------------------|------------------------------------------------------------------------------------|-------------------------|----|----|----|---|---|---|
|         | Log <sub>2</sub> Ratio | Log <sub>2</sub> Sum | q-Value  | p-Value  | FnPg | FnSg | FnPg       | FnSg                                  |                                                                                    |                         |    |    |    |   |   |   |
|         |                        |                      |          |          |      |      |            |                                       |                                                                                    |                         | -6 | -4 | -2 | 0 | 2 | 4 |
| FN0898  | 0.373                  | 5.202                |          |          |      | 6    |            | 7.8097                                | AAL95094.1  Hypothetical protein                                                   |                         |    |    |    |   |   |   |
|         |                        |                      |          |          | 5    | 6    | 5.3301     | 6.0000                                |                                                                                    |                         |    |    |    |   |   |   |
| FN0900  | 1.742                  | 6.902                |          |          | 6    |      | 8.7636     | AAL95096.1  Metal dependent hydrolase |                                                                                    |                         |    |    |    |   |   |   |
|         |                        |                      |          |          | 3    | 20   | 3.1981     |                                       | 20.0000                                                                            |                         |    |    |    |   |   |   |
| FN0901  | 0.597                  | 7.121                |          |          |      | 10   |            | 13.0162                               | AAL95097.1  DNA polymerase, bacteriophage-type                                     |                         |    |    |    |   |   |   |
|         |                        |                      |          |          | 9    | 16   | 9.5942     | 16.0000                               |                                                                                    |                         |    |    |    |   |   |   |
| FN0903  | -0.003                 | 9.315                | 4.299e-1 | 9.845e-1 | 20   | 18   | 29.2119    | 23.4291                               | AAL95099.1  Polysialic acid capsule expression protein kpsF                        |                         |    |    |    |   |   |   |
|         |                        |                      |          |          | 20   | 27   | 21.3204    | 27.0000                               |                                                                                    |                         |    |    |    |   |   |   |
| FN0904  |                        |                      |          |          |      |      |            |                                       | AAL95100.1  NAD(FAD)-utilizing dehydrogenases                                      |                         |    |    |    |   |   |   |
|         |                        |                      |          |          | 4    |      | 4.2641     |                                       |                                                                                    |                         |    |    |    |   |   |   |
| FN0906  | 0.573                  | 9.839                | 1.33e-2  | 2.589e-3 | 15   | 26   | 21.9089    | 33.8420                               | AAL95102.1  Glycerol-3-phosphate dehydrogenase [NAD(P)+]                           |                         |    |    |    |   |   |   |
|         |                        |                      |          |          | 26   | 40   | 27.7165    | 40.0000                               |                                                                                    |                         |    |    |    |   |   |   |
| FN0908  | -0.058                 | 7.940                |          |          |      | 9    |            | 11.7145                               | AAL95104.1  Tpl protein                                                            |                         |    |    |    |   |   |   |
|         |                        |                      |          |          | 15   | 19   | 15.9903    | 19.0000                               |                                                                                    |                         |    |    |    |   |   |   |
| FN0909  |                        |                      |          |          | 7    |      | 10.2242    |                                       | AAL95105.1  DNA repair protein radC                                                |                         |    |    |    |   |   |   |
|         |                        |                      |          |          |      |      |            |                                       |                                                                                    |                         |    |    |    |   |   |   |
| FN0910  | -0.402                 | 5.782                |          |          |      | 3    |            | 3.9048                                | AAL95106.1  Nicotinate-nucleotide--dimethylbenzimidazole phosphoribosyltransferase |                         |    |    |    |   |   |   |
|         |                        |                      |          |          | 8    | 9    | 8.5282     | 9.0000                                |                                                                                    |                         |    |    |    |   |   |   |
| FN0911  | -0.506                 | 6.018                |          |          |      | 5    |            | 6.5081                                | AAL95107.1  Alpha-ribazole-5'-phosphate phosphatase                                |                         |    |    |    |   |   |   |
|         |                        |                      |          |          | 9    | 7    | 9.5942     | 7.0000                                |                                                                                    |                         |    |    |    |   |   |   |
| FN0912  | -1.114                 | 7.566                |          |          |      | 9    |            | 11.7145                               | AAL95108.1  Cobalamin [5'-phosphate] synthase                                      |                         |    |    |    |   |   |   |
|         |                        |                      |          |          | 19   | 7    | 20.2544    | 7.0000                                |                                                                                    |                         |    |    |    |   |   |   |
| FN0913  | -0.414                 | 6.414                |          |          |      |      |            |                                       | AAL95109.1  Cobinamide kinase                                                      |                         |    |    |    |   |   |   |
|         |                        |                      |          |          | 10   | 8    | 10.6602    | 8.0000                                |                                                                                    |                         |    |    |    |   |   |   |
| FN0915  | 0.493                  | 11.328               | 1.881e-1 | 2.829e-1 | 14   | 54   | 20.4483    | 70.2873                               | AAL95111.1  PTS system, N-acetylglucosamine-specific IIA component                 |                         |    |    |    |   |   |   |
|         |                        |                      |          |          | 61   | 50   | 65.0272    | 50.0000                               |                                                                                    |                         |    |    |    |   |   |   |
| FN0916  | 0.368                  | 14.727               | 1.485e-1 | 1.858e-1 | 70   | 153  | 102.2417   | 199.1473                              | AAL95112.1  Hypothetical Exported Protein                                          |                         |    |    |    |   |   |   |
|         |                        |                      |          |          | 176  | 175  | 187.6194   | 175.0000                              |                                                                                    |                         |    |    |    |   |   |   |
| FN0917  | 1.614                  | 5.799                |          |          |      | 7    |            | 9.1113                                | AAL95113.1  Hypothetical protein                                                   |                         |    |    |    |   |   |   |
|         |                        |                      |          |          | 4    | 17   | 4.2641     | 17.0000                               |                                                                                    |                         |    |    |    |   |   |   |
| FN0920  |                        |                      |          |          |      |      |            |                                       | AAL95116.1  Protease HTPX                                                          |                         |    |    |    |   |   |   |
|         |                        |                      |          |          | 10   |      | 10.6602    |                                       |                                                                                    |                         |    |    |    |   |   |   |

Show detected proteins only  
 Show all proteins  
 Filter by category:

Proteins found: 1313

Test Cutoff

| Signif | Direction | Applies To   |
|--------|-----------|--------------|
| yes    | +         | ratios, bars |
| no     | n/a       | bars         |
| yes    | -         | ratios, bars |
| yes    | +         | p-, q-Values |
| yes    | -         | p-, q-Values |

Fn Summary Table FnPg vs Fn FnSg vs Fn FnPgSg vs Fn FnPgSg vs FnPg FnSg vs FnPg FnPgSg vs FnSg Fn Coverage

| Protein | FnSg vs FnPg           |                      |          |          | Raw  |      |         |          | Normalized |      |      |      | Description | Log <sub>2</sub> Ratios |    |    |   |   |   |   |  |
|---------|------------------------|----------------------|----------|----------|------|------|---------|----------|------------|------|------|------|-------------|-------------------------|----|----|---|---|---|---|--|
|         | Log <sub>2</sub> Ratio | Log <sub>2</sub> Sum | q-Value  | p-Value  | FnPg | FnSg | FnPg    | FnSg     | FnPg       | FnSg | FnPg | FnSg |             | -6                      | -4 | -2 | 0 | 2 | 4 | 6 |  |
| FN0921  | -0.604                 | 10.565               |          |          |      | 27   |         | 35.1436  |            |      |      |      |             |                         |    |    |   |   |   |   |  |
|         |                        |                      |          |          | 45   | 28   | 47.9709 | 28.0000  |            |      |      |      |             |                         |    |    |   |   |   |   |  |
| FN0923  |                        |                      |          |          |      |      |         |          |            |      |      |      |             |                         |    |    |   |   |   |   |  |
|         |                        |                      |          |          | 4    |      | 4.2641  |          |            |      |      |      |             |                         |    |    |   |   |   |   |  |
| FN0925  | 0.660                  | 6.014                |          |          |      | 4    |         | 5.2065   |            |      |      |      |             |                         |    |    |   |   |   |   |  |
|         |                        |                      |          |          | 6    | 15   | 6.3961  | 15.0000  |            |      |      |      |             |                         |    |    |   |   |   |   |  |
| FN0926  | -0.223                 | 10.796               | 1e-3     | 2.979e-5 |      | 31   | 30      | 45.2785  | 39.0485    |      |      |      |             |                         |    |    |   |   |   |   |  |
|         |                        |                      |          |          |      | 43   | 39      | 45.8388  | 39.0000    |      |      |      |             |                         |    |    |   |   |   |   |  |
| FN0928  | -0.423                 | 6.406                |          |          |      |      | 3       |          | 3.9048     |      |      |      |             |                         |    |    |   |   |   |   |  |
|         |                        |                      |          |          |      | 10   | 12      | 10.6602  | 12.0000    |      |      |      |             |                         |    |    |   |   |   |   |  |
| FN0929  | 0.453                  | 9.091                | 2.564e-2 | 7.001e-3 |      | 12   | 22      | 17.5271  | 28.6356    |      |      |      |             |                         |    |    |   |   |   |   |  |
|         |                        |                      |          |          |      | 21   | 26      | 22.3864  | 26.0000    |      |      |      |             |                         |    |    |   |   |   |   |  |
| FN0930  | -0.425                 | 5.068                |          |          |      | 7    |         | 10.2242  |            |      |      |      |             |                         |    |    |   |   |   |   |  |
|         |                        |                      |          |          |      | 3    | 5       | 3.1981   | 5.0000     |      |      |      |             |                         |    |    |   |   |   |   |  |
| FN0932  | 0.159                  | 8.158                |          |          |      |      | 9       |          | 11.7145    |      |      |      |             |                         |    |    |   |   |   |   |  |
|         |                        |                      |          |          |      | 15   | 24      | 15.9903  | 24.0000    |      |      |      |             |                         |    |    |   |   |   |   |  |
| FN0934  | 0.517                  | 9.486                |          |          |      |      | 30      |          | 39.0485    |      |      |      |             |                         |    |    |   |   |   |   |  |
|         |                        |                      |          |          |      | 21   | 25      | 22.3864  | 25.0000    |      |      |      |             |                         |    |    |   |   |   |   |  |
| FN0938  | -0.128                 | 11.165               |          |          |      |      | 42      |          | 54.6679    |      |      |      |             |                         |    |    |   |   |   |   |  |
|         |                        |                      |          |          |      | 47   | 37      | 50.1029  | 37.0000    |      |      |      |             |                         |    |    |   |   |   |   |  |
| FN0940  | -1.050                 | 9.850                |          |          |      |      | 14      |          | 18.2226    |      |      |      |             |                         |    |    |   |   |   |   |  |
|         |                        |                      |          |          |      | 41   | 24      | 43.7068  | 24.0000    |      |      |      |             |                         |    |    |   |   |   |   |  |
| FN0941  | -0.610                 | 11.697               | 5.384e-2 | 2.631e-2 |      | 42   | 44      | 61.3450  | 57.2711    |      |      |      |             |                         |    |    |   |   |   |   |  |
|         |                        |                      |          |          |      | 76   | 36      | 81.0175  | 36.0000    |      |      |      |             |                         |    |    |   |   |   |   |  |
| FN0943  | -0.567                 | 9.792                |          |          |      |      | 13      |          | 16.9210    |      |      |      |             |                         |    |    |   |   |   |   |  |
|         |                        |                      |          |          |      | 34   | 32      | 36.2447  | 32.0000    |      |      |      |             |                         |    |    |   |   |   |   |  |
| FN0944  |                        |                      |          |          |      |      |         |          |            |      |      |      |             |                         |    |    |   |   |   |   |  |
|         |                        |                      |          |          |      | 4    |         | 4.2641   |            |      |      |      |             |                         |    |    |   |   |   |   |  |
| FN0947  | -0.858                 | 12.017               | 1.148e-1 | 1.099e-1 |      | 80   | 32      | 116.8476 | 41.6517    |      |      |      |             |                         |    |    |   |   |   |   |  |
|         |                        |                      |          |          |      | 53   | 54      | 56.4990  | 54.0000    |      |      |      |             |                         |    |    |   |   |   |   |  |
| FN0949  | -1.411                 | 13.207               | 1.839e-1 | 2.72e-1  |      | 196  | 44      | 286.2767 | 57.2711    |      |      |      |             |                         |    |    |   |   |   |   |  |
|         |                        |                      |          |          |      | 29   | 62      | 30.9146  | 62.0000    |      |      |      |             |                         |    |    |   |   |   |   |  |

Show detected proteins only  
 Show all proteins  
 Filter by category:

Proteins found:  
1313

**Test** **Cutoff**

| Signif | Direction | Applies To   |
|--------|-----------|--------------|
| yes    | +         | ratios, bars |
| no     | n/a       | bars         |
| yes    | -         | ratios, bars |
| yes    | +         | p-, q-Values |
| yes    | -         | p-, q-Values |

Fn Summary Table FnPg vs Fn FnSg vs Fn FnPgSg vs Fn FnPgSg vs FnPg FnSg vs FnPg FnPgSg vs FnSg Fn Coverage

| Protein       | FnSg vs FnPg           |                      |          |          | Raw  |      | Normalized |         | Description                                                        | Log <sub>2</sub> Ratios |                                                |    |   |   |   |   |
|---------------|------------------------|----------------------|----------|----------|------|------|------------|---------|--------------------------------------------------------------------|-------------------------|------------------------------------------------|----|---|---|---|---|
|               | Log <sub>2</sub> Ratio | Log <sub>2</sub> Sum | q-Value  | p-Value  | FnPg | FnSg | FnPg       | FnSg    |                                                                    | -6                      | -4                                             | -2 | 0 | 2 | 4 | 6 |
|               | <b>FN0951</b>          | -0.775               | 6.390    |          |      | 4    |            | 5.8424  |                                                                    |                         | AAL95147.1  Precorrin-3B C17-methyltransferase |    |   |   |   |   |
|               |                        |                      |          |          | 17   | 7    | 18.1223    | 7.0000  |                                                                    |                         |                                                |    |   |   |   |   |
| <b>FN0957</b> | -1.418                 | 7.945                | 3.972e-2 | 1.487e-2 | 22   | 4    | 32.1331    | 5.2065  | AAL95153.1  Precorrin-4 C11-methyltransferase                      |                         |                                                |    |   |   |   |   |
|               |                        |                      |          |          | 18   | 14   | 19.1883    | 14.0000 |                                                                    |                         |                                                |    |   |   |   |   |
| <b>FN0958</b> | -2.061                 | 7.676                |          |          | 20   |      | 29.2119    |         | AAL95154.1  unknown                                                |                         |                                                |    |   |   |   |   |
|               |                        |                      |          |          |      | 7    |            | 7.0000  |                                                                    |                         |                                                |    |   |   |   |   |
| <b>FN0959</b> | -1.481                 | 6.125                |          |          | 14   |      | 20.4483    |         | AAL95155.1  Precorrin-2 C20-methyltransferase                      |                         |                                                |    |   |   |   |   |
|               |                        |                      |          |          | 7    | 5    | 7.4621     | 5.0000  |                                                                    |                         |                                                |    |   |   |   |   |
| <b>FN0961</b> | 0.896                  | 8.505                |          |          | 6    |      | 8.7636     |         | AAL95157.1  Hypothetical protein                                   |                         |                                                |    |   |   |   |   |
|               |                        |                      |          |          | 18   | 26   | 19.1883    | 26.0000 |                                                                    |                         |                                                |    |   |   |   |   |
| <b>FN0962</b> | -1.359                 | 9.016                | 5.476e-3 | 6.561e-4 | 28   | 8    | 40.8967    | 10.4129 | AAL95158.1  Hypothetical cytosolic protein                         |                         |                                                |    |   |   |   |   |
|               |                        |                      |          |          | 30   | 18   | 31.9806    | 18.0000 |                                                                    |                         |                                                |    |   |   |   |   |
| <b>FN0964</b> | 0.321                  | 5.873                | 2.515e-2 | 6.763e-3 | 5    | 7    | 7.3030     | 9.1113  | AAL95160.1  Precorrin-8W decarboxylase                             |                         |                                                |    |   |   |   |   |
|               |                        |                      |          |          | 6    | 8    | 6.3961     | 8.0000  |                                                                    |                         |                                                |    |   |   |   |   |
| <b>FN0965</b> | -0.112                 | 12.001               | 3.106e-1 | 5.882e-1 | 51   | 57   | 74.4904    | 74.1921 | AAL95161.1  D-3-phosphoglycerate dehydrogenase                     |                         |                                                |    |   |   |   |   |
|               |                        |                      |          |          | 55   | 49   | 58.6311    | 49.0000 |                                                                    |                         |                                                |    |   |   |   |   |
| <b>FN0966</b> | 0.645                  | 3.999                |          |          |      |      |            |         | AAL95162.1  Precorrin-6Y C5,15-methyltransferase (decarboxylating) |                         |                                                |    |   |   |   |   |
|               |                        |                      |          |          | 3    | 5    | 3.1981     | 5.0000  |                                                                    |                         |                                                |    |   |   |   |   |
| <b>FN0967</b> | -0.769                 | 5.939                |          |          | 7    |      | 10.2242    |         | AAL95163.1  CbiD protein                                           |                         |                                                |    |   |   |   |   |
|               |                        |                      |          |          |      | 6    |            | 6.0000  |                                                                    |                         |                                                |    |   |   |   |   |
| <b>FN0970</b> | -0.290                 | 7.143                |          |          | 9    | 5    | 13.1454    | 6.5081  | AAL95166.1  Precorrin-8X methylmutase                              |                         |                                                |    |   |   |   |   |
|               |                        |                      |          |          |      | 15   |            | 15.0000 |                                                                    |                         |                                                |    |   |   |   |   |
| <b>FN0971</b> |                        |                      |          |          |      |      |            |         | AAL95167.1  hypothetical cytosolic protein                         |                         |                                                |    |   |   |   |   |
|               |                        |                      |          |          |      | 4    |            | 5.2065  |                                                                    |                         |                                                |    |   |   |   |   |
| <b>FN0972</b> | 0.608                  | 8.205                | 2.417e-1 | 4.149e-1 | 3    | 8    | 4.3818     | 10.4129 | AAL95168.1  Cobyrinic acid a,c-diamide synthase                    |                         |                                                |    |   |   |   |   |
|               |                        |                      |          |          | 22   | 32   | 23.4524    | 32.0000 |                                                                    |                         |                                                |    |   |   |   |   |
| <b>FN0974</b> |                        |                      |          |          |      |      |            |         | AAL95170.1  Lactoylglutathione lyase                               |                         |                                                |    |   |   |   |   |
|               |                        |                      |          |          | 4    |      | 4.2641     |         |                                                                    |                         |                                                |    |   |   |   |   |
| <b>FN0976</b> | 0.144                  | 11.383               | 2.891e-1 | 5.31e-1  | 33   | 32   | 48.1997    | 41.6517 | AAL95172.1  Hypothetical protein                                   |                         |                                                |    |   |   |   |   |
|               |                        |                      |          |          | 47   | 67   | 50.1029    | 67.0000 |                                                                    |                         |                                                |    |   |   |   |   |
| <b>FN0977</b> | 1.438                  | 9.116                | 2.056e-2 | 4.855e-3 | 5    | 35   | 7.3030     | 45.5566 | AAL95173.1  Cobyrinic acid synthase                                |                         |                                                |    |   |   |   |   |
|               |                        |                      |          |          | 20   | 32   | 21.3204    | 32.0000 |                                                                    |                         |                                                |    |   |   |   |   |

Show detected proteins only  
 Show all proteins  
 Filter by category:

Proteins found: 1313

Test Cutoff

| Signif | Direction | Applies To   |
|--------|-----------|--------------|
| yes    | +         | ratios, bars |
| no     | n/a       | bars         |
| yes    | -         | ratios, bars |
| yes    | +         | p-, q-Values |
| yes    | -         | p-, q-Values |

Fn Summary Table FnPg vs Fn FnSg vs Fn FnPgSg vs Fn FnPgSg vs FnPg FnSg vs FnPg FnPgSg vs FnSg Fn Coverage

| Protein | FnSg vs FnPg           |                      |          |          | Raw  |      |           |           | Normalized                                                               |    |    |    | Log <sub>2</sub> Ratios |   |   |   |  |  |  |
|---------|------------------------|----------------------|----------|----------|------|------|-----------|-----------|--------------------------------------------------------------------------|----|----|----|-------------------------|---|---|---|--|--|--|
|         | Log <sub>2</sub> Ratio | Log <sub>2</sub> Sum | q-Value  | p-Value  | FnPg | FnSg | FnPg      | FnSg      | Description                                                              |    |    |    |                         |   |   |   |  |  |  |
|         |                        |                      |          |          |      |      |           |           |                                                                          | -6 | -4 | -2 | 0                       | 2 | 4 | 6 |  |  |  |
| FN0981  | -0.504                 | 12.408               | 2.381e-1 | 4.061e-1 | 29   | 59   | 42.3573   | 76.7954   | AAL95177.1  Phosphoribosylamine--glycine ligase                          |    |    |    |                         |   |   |   |  |  |  |
|         |                        |                      |          |          | 125  | 47   | 133.2524  | 47.0000   |                                                                          |    |    |    |                         |   |   |   |  |  |  |
| FN0982  | 0.265                  | 15.280               | 1.408e-1 | 1.651e-1 | 101  | 180  | 147.5201  | 234.2910  | AAL95178.1  Phosphoribosylaminoimidazolecarboxamide formyltransferase    |    |    |    |                         |   |   |   |  |  |  |
|         |                        |                      |          |          | 203  | 203  | 216.4019  | 203.0000  |                                                                          |    |    |    |                         |   |   |   |  |  |  |
| FN0983  | 0.355                  | 14.383               | 8.978e-2 | 6.911e-2 | 104  | 115  | 151.9019  | 149.6859  | AAL95179.1  Hypothetical protein                                         |    |    |    |                         |   |   |   |  |  |  |
|         |                        |                      |          |          | 100  | 181  | 106.6019  | 181.0000  |                                                                          |    |    |    |                         |   |   |   |  |  |  |
| FN0984  | 0.873                  | 11.030               | 5.226e-3 | 6.098e-4 | 20   | 49   | 29.2119   | 63.7792   | AAL95180.1  Tetracenomycin polyketide synthesis O-methyltransferase tcmP |    |    |    |                         |   |   |   |  |  |  |
|         |                        |                      |          |          | 36   | 60   | 38.3767   | 60.0000   |                                                                          |    |    |    |                         |   |   |   |  |  |  |
| FN0985  | 1.102                  | 7.287                |          |          |      | 12   |           | 15.6194   | AAL95181.1  Phosphoribosylglycinamide formyltransferase                  |    |    |    |                         |   |   |   |  |  |  |
|         |                        |                      |          |          | 8    | 21   | 8.5282    | 21.0000   |                                                                          |    |    |    |                         |   |   |   |  |  |  |
| FN0986  | 0.231                  | 15.265               | 3.259e-1 | 6.311e-1 | 64   | 119  | 93.4781   | 154.8924  | AAL95182.1  Phosphoribosylformylglycinamide cycloligase                  |    |    |    |                         |   |   |   |  |  |  |
|         |                        |                      |          |          | 256  | 275  | 272.9009  | 275.0000  |                                                                          |    |    |    |                         |   |   |   |  |  |  |
| FN0987  | 0.779                  | 13.771               | 1.482e-1 | 1.851e-1 | 17   | 112  | 24.8301   | 145.7811  | AAL95183.1  Amidophosphoribosyltransferase                               |    |    |    |                         |   |   |   |  |  |  |
|         |                        |                      |          |          | 146  | 164  | 155.6388  | 164.0000  |                                                                          |    |    |    |                         |   |   |   |  |  |  |
| FN0988  | 0.060                  | 15.807               | 3.888e-1 | 8.305e-1 | 116  | 156  | 169.4291  | 203.0522  | AAL95184.1  Phosphoribosylamidoimidazole-succinocarboxamide synthase     |    |    |    |                         |   |   |   |  |  |  |
|         |                        |                      |          |          | 281  | 286  | 299.5514  | 286.0000  |                                                                          |    |    |    |                         |   |   |   |  |  |  |
| FN0989  | 0.050                  | 15.288               | 3.92e-1  | 8.416e-1 | 121  | 116  | 176.7321  | 150.9875  | AAL95185.1  Phosphoribosylaminoimidazole carboxylase catalytic subunit   |    |    |    |                         |   |   |   |  |  |  |
|         |                        |                      |          |          | 203  | 256  | 216.4019  | 256.0000  |                                                                          |    |    |    |                         |   |   |   |  |  |  |
| FN0990  | 0.834                  | 20.908               | 7.738e-2 | 5.039e-2 | 411  | 1412 | 600.3047  | 1837.8826 | AAL95186.1  Phosphoribosylformylglycinamide synthase                     |    |    |    |                         |   |   |   |  |  |  |
|         |                        |                      |          |          | 1408 | 1907 | 1500.9551 | 1907.0000 |                                                                          |    |    |    |                         |   |   |   |  |  |  |
| FN0991  | -0.090                 | 9.717                | 2.554e-1 | 4.478e-1 | 22   | 24   | 32.1331   | 31.2388   | AAL95187.1  CDP-diacylglycerol--serine O-phosphatidyltransferase         |    |    |    |                         |   |   |   |  |  |  |
|         |                        |                      |          |          | 26   | 25   | 27.7165   | 25.0000   |                                                                          |    |    |    |                         |   |   |   |  |  |  |
| FN0992  | 0.892                  | 9.216                | 6.184e-2 | 3.307e-2 | 7    | 28   | 10.2242   | 36.4453   | AAL95188.1  ADP-heptose:LPS heptosyltransferase II                       |    |    |    |                         |   |   |   |  |  |  |
|         |                        |                      |          |          | 24   | 30   | 25.5845   | 30.0000   |                                                                          |    |    |    |                         |   |   |   |  |  |  |
| FN0994  | 0.040                  | 13.306               | 4.174e-1 | 9.355e-1 | 33   | 60   | 48.1997   | 78.0970   | AAL95190.1  Hypothetical protein                                         |    |    |    |                         |   |   |   |  |  |  |
|         |                        |                      |          |          | 141  | 126  | 150.3087  | 126.0000  |                                                                          |    |    |    |                         |   |   |   |  |  |  |
| FN0997  | 0.649                  | 11.507               | 1.465e-1 | 1.803e-1 | 13   | 60   | 18.9877   | 78.0970   | AAL95193.1  Hypothetical protein                                         |    |    |    |                         |   |   |   |  |  |  |
|         |                        |                      |          |          | 63   | 57   | 67.1592   | 57.0000   |                                                                          |    |    |    |                         |   |   |   |  |  |  |
| FN0998  | 1.402                  | 15.330               | 2.05e-2  | 4.831e-3 | 52   | 248  | 75.9510   | 322.8009  | AAL95194.1  Dipeptide-binding protein                                    |    |    |    |                         |   |   |   |  |  |  |
|         |                        |                      |          |          | 163  | 337  | 173.7611  | 337.0000  |                                                                          |    |    |    |                         |   |   |   |  |  |  |
| FN0999  | -0.636                 | 11.318               | 2.471e-1 | 4.279e-1 | 14   | 30   | 20.4483   | 39.0485   | AAL95195.1  Deblocking aminopeptidase                                    |    |    |    |                         |   |   |   |  |  |  |
|         |                        |                      |          |          | 99   | 42   | 105.5359  | 42.0000   |                                                                          |    |    |    |                         |   |   |   |  |  |  |

Show detected proteins only  
 Show all proteins  
 Filter by category:

Proteins found: 1313

Test Cutoff

| Signif | Direction | Applies To   |
|--------|-----------|--------------|
| yes    | +         | ratios, bars |
| no     | n/a       | bars         |
| yes    | -         | ratios, bars |
| yes    | +         | p-, q-Values |
| yes    | -         | p-, q-Values |

Fn Summary Table FnPg vs Fn FnSg vs Fn FnPgSg vs Fn FnPgSg vs FnPg FnSg vs FnPg FnPgSg vs FnSg Fn Coverage

| Protein       | FnSg vs FnPg           |                      |          |          | Raw  |      | Normalized |           | Description                                                            | Log <sub>2</sub> Ratios |    |    |   |   |   |   |
|---------------|------------------------|----------------------|----------|----------|------|------|------------|-----------|------------------------------------------------------------------------|-------------------------|----|----|---|---|---|---|
|               | Log <sub>2</sub> Ratio | Log <sub>2</sub> Sum | q-Value  | p-Value  | FnPg | FnSg | FnPg       | FnSg      |                                                                        | -6                      | -4 | -2 | 0 | 2 | 4 | 6 |
| <b>FN1000</b> |                        |                      |          |          | 16   |      | 23.3695    |           | AAL95196.1  Biotin synthase                                            |                         |    |    |   |   |   |   |
| <b>FN1001</b> | 0.163                  | 10.734               | 3.475e-1 | 6.953e-1 | 14   | 31   | 20.4483    | 40.3501   | AAL95197.1  Dethiobiotin synthetase                                    |                         |    |    |   |   |   |   |
|               |                        |                      |          |          | 54   | 47   | 57.5650    | 47.0000   |                                                                        |                         |    |    |   |   |   |   |
| <b>FN1002</b> | -1.471                 | 10.879               | 8.808e-2 | 6.632e-2 | 69   | 17   | 100.7811   | 22.1275   | AAL95198.1  Adenosylmethionine-8-amino-7-oxononanoate aminotransferase |                         |    |    |   |   |   |   |
|               |                        |                      |          |          | 41   | 30   | 43.7068    | 30.0000   |                                                                        |                         |    |    |   |   |   |   |
| <b>FN1003</b> | -0.787                 | 14.629               | 2.781e-1 | 5.028e-1 | 6    | 84   | 8.7636     | 109.3358  | AAL95199.1  Outer membrane protein P1 precursor                        |                         |    |    |   |   |   |   |
|               |                        |                      |          |          | 384  | 133  | 409.3514   | 133.0000  |                                                                        |                         |    |    |   |   |   |   |
| <b>FN1004</b> | 0.234                  | 8.546                | 3.101e-1 | 5.867e-1 | 12   | 23   | 17.5271    | 29.9372   | AAL95200.1  Transcriptional regulator, TetR family                     |                         |    |    |   |   |   |   |
|               |                        |                      |          |          | 17   | 12   | 18.1223    | 12.0000   |                                                                        |                         |    |    |   |   |   |   |
| <b>FN1005</b> | 0.414                  | 10.773               |          |          |      | 45   |            | 58.5727   | AAL95201.1  Hypothetical protein                                       |                         |    |    |   |   |   |   |
|               |                        |                      |          |          | 34   | 38   | 36.2447    | 38.0000   |                                                                        |                         |    |    |   |   |   |   |
| <b>FN1006</b> | -0.900                 | 8.070                |          |          |      |      |            |           | AAL95202.1  Acetyltransferase                                          |                         |    |    |   |   |   |   |
|               |                        |                      |          |          | 21   | 12   | 22.3864    | 12.0000   |                                                                        |                         |    |    |   |   |   |   |
| <b>FN1010</b> | -0.769                 | 14.158               | 1.418e-1 | 1.676e-1 | 73   | 90   | 106.6235   | 117.1455  | AAL95206.1  Hypothetical cytosolic protein                             |                         |    |    |   |   |   |   |
|               |                        |                      |          |          | 231  | 90   | 246.2505   | 90.0000   |                                                                        |                         |    |    |   |   |   |   |
| <b>FN1011</b> | -0.006                 | 7.141                | 4.221e-1 | 9.536e-1 | 9    | 9    | 13.1454    | 11.7145   | AAL95207.1  MGPA protein                                               |                         |    |    |   |   |   |   |
|               |                        |                      |          |          | 10   | 12   | 10.6602    | 12.0000   |                                                                        |                         |    |    |   |   |   |   |
| <b>FN1012</b> | 0.290                  | 10.301               | 1.471e-1 | 1.82e-1  | 25   | 25   | 36.5149    | 32.5404   | AAL95208.1  HPR(Ser) kinase                                            |                         |    |    |   |   |   |   |
|               |                        |                      |          |          | 26   | 46   | 27.7165    | 46.0000   |                                                                        |                         |    |    |   |   |   |   |
| <b>FN1014</b> | 0.492                  | 9.595                |          |          |      | 33   |            | 42.9533   | AAL95210.1  Folylpolylglutamate synthase                               |                         |    |    |   |   |   |   |
|               |                        |                      |          |          | 22   | 23   | 23.4524    | 23.0000   |                                                                        |                         |    |    |   |   |   |   |
| <b>FN1015</b> | -1.341                 | 8.560                |          |          |      | 8    |            | 10.4129   | AAL95211.1  5'-methylthioadenosine nucleosidase                        |                         |    |    |   |   |   |   |
|               |                        |                      |          |          | 29   | 14   | 30.9146    | 14.0000   |                                                                        |                         |    |    |   |   |   |   |
| <b>FN1016</b> | 1.182                  | 8.927                | 5.703e-2 | 2.886e-2 | 4    | 28   | 5.8424     | 36.4453   | AAL95212.1  Lipid A biosynthesis lauroyl acyltransferase               |                         |    |    |   |   |   |   |
|               |                        |                      |          |          | 22   | 30   | 23.4524    | 30.0000   |                                                                        |                         |    |    |   |   |   |   |
| <b>FN1017</b> | -0.078                 | 12.632               | 3.919e-1 | 8.413e-1 | 34   | 70   | 49.6602    | 91.1132   | AAL95213.1  Hypothetical Exported Protein                              |                         |    |    |   |   |   |   |
|               |                        |                      |          |          | 107  | 64   | 114.0641   | 64.0000   |                                                                        |                         |    |    |   |   |   |   |
| <b>FN1019</b> | -0.646                 | 24.242               | 7.914e-3 | 1.238e-3 | 3572 | 2651 | 5217.2471  | 3450.5855 | AAL95215.1  3-hydroxybutyryl-CoA dehydrogenase                         |                         |    |    |   |   |   |   |
|               |                        |                      |          |          | 5563 | 3671 | 5930.2652  | 3671.0000 |                                                                        |                         |    |    |   |   |   |   |
| <b>FN1020</b> | -0.377                 | 18.349               | 1.128e-1 | 1.064e-1 | 460  | 478  | 671.8739   | 622.1727  | AAL95216.1  3-hydroxybutyryl-CoA dehydratase                           |                         |    |    |   |   |   |   |
|               |                        |                      |          |          | 605  | 392  | 644.9417   | 392.0000  |                                                                        |                         |    |    |   |   |   |   |

Show detected proteins only  
 Show all proteins  
 Filter by category:

Proteins found: 1313

Enter (or paste) list of ORFs

Find ORFs

Test Cutoff

q-Value

p-Value

.005

| Signif | Direction | Applies To   |
|--------|-----------|--------------|
| yes    | +         | ratios, bars |
| no     | n/a       | bars         |
| yes    | -         | ratios, bars |
| yes    | +         | p-, q-Values |
| yes    | -         | p-, q-Values |

Dot Plots Dot Plots

Fn Summary Table FnPg vs Fn FnSg vs Fn FnPgSg vs Fn FnPgSg vs FnPg FnSg vs FnPg FnPgSg vs FnSg Fn Coverage

| Protein | FnSg vs FnPg           |                      |          |          | Raw  |      | Normalized |           | Description                                                  | Log <sub>2</sub> Ratios |    |    |   |   |   |   |
|---------|------------------------|----------------------|----------|----------|------|------|------------|-----------|--------------------------------------------------------------|-------------------------|----|----|---|---|---|---|
|         | Log <sub>2</sub> Ratio | Log <sub>2</sub> Sum | q-Value  | p-Value  | FnPg | FnSg | FnPg       | FnSg      |                                                              | -6                      | -4 | -2 | 0 | 2 | 4 | 6 |
| FN1023  | 0.351                  | 8.711                |          |          |      | 24   |            | 31.2388   | AAL95219.1  5-Nitroimidazole antibiotic resistance protein   |                         |    |    |   |   |   |   |
|         |                        |                      |          |          | 17   | 15   | 18.1223    | 15.0000   |                                                              |                         |    |    |   |   |   |   |
| FN1024  | -0.080                 | 20.340               | 3.402e-1 | 6.731e-1 | 934  | 726  | 1364.1962  | 944.9736  | AAL95220.1  DNA-binding protein HU                           |                         |    |    |   |   |   |   |
|         |                        |                      |          |          | 943  | 1296 | 1005.2562  | 1296.0000 |                                                              |                         |    |    |   |   |   |   |
| FN1025  | -0.940                 | 7.584                |          |          |      |      |            |           | AAL95221.1  Guanine-hypoxanthine permease                    |                         |    |    |   |   |   |   |
|         |                        |                      |          |          | 18   | 10   | 19.1883    | 10.0000   |                                                              |                         |    |    |   |   |   |   |
| FN1026  |                        |                      |          |          |      |      |            |           | AAL95222.1  tRNA pseudouridine synthase A                    |                         |    |    |   |   |   |   |
|         |                        |                      |          |          |      | 6    |            | 6.0000    |                                                              |                         |    |    |   |   |   |   |
| FN1028  | -0.206                 | 9.581                | 2.31e-1  | 3.874e-1 | 21   | 25   | 30.6725    | 32.5404   | AAL95224.1  Deoxyuridine 5'-triphosphate nucleotidohydrolase |                         |    |    |   |   |   |   |
|         |                        |                      |          |          | 27   | 19   | 28.7825    | 19.0000   |                                                              |                         |    |    |   |   |   |   |
| FN1029  | -0.699                 | 12.026               | 5.539e-4 | 7.104e-6 | 55   | 41   | 80.3328    | 53.3663   | AAL95225.1  Zinc protease                                    |                         |    |    |   |   |   |   |
|         |                        |                      |          |          | 79   | 48   | 84.2155    | 48.0000   |                                                              |                         |    |    |   |   |   |   |
| FN1030  | -0.312                 | 9.043                |          |          |      | 14   |            | 18.2226   | AAL95226.1  Hypothetical membrane-spanning protein           |                         |    |    |   |   |   |   |
|         |                        |                      |          |          | 24   | 23   | 25.5845    | 23.0000   |                                                              |                         |    |    |   |   |   |   |
| FN1031  | -0.218                 | 7.137                |          |          |      |      |            |           | AAL95227.1  Hypothetical membrane-spanning protein           |                         |    |    |   |   |   |   |
|         |                        |                      |          |          | 12   | 11   | 12.7922    | 11.0000   |                                                              |                         |    |    |   |   |   |   |
| FN1033  | -0.270                 | 11.800               | 1.251e-1 | 1.298e-1 | 46   | 49   | 67.1874    | 63.7792   | AAL95229.1  Methyltransferase                                |                         |    |    |   |   |   |   |
|         |                        |                      |          |          | 60   | 45   | 63.9612    | 45.0000   |                                                              |                         |    |    |   |   |   |   |
| FN1034  |                        |                      |          |          |      | 5    |            | 6.5081    | AAL95230.1  Transcriptional regulator, TetR family           |                         |    |    |   |   |   |   |
|         |                        |                      |          |          |      | 13   |            | 13.0000   |                                                              |                         |    |    |   |   |   |   |
| FN1035  |                        |                      |          |          |      |      |            |           | AAL95231.1  Iron-sulfur flavoprotein                         |                         |    |    |   |   |   |   |
|         |                        |                      |          |          |      | 3    |            | 3.0000    |                                                              |                         |    |    |   |   |   |   |
| FN1036  |                        |                      |          |          |      | 3    |            | 3.9048    | AAL95232.1  Hypothetical protein                             |                         |    |    |   |   |   |   |
|         |                        |                      |          |          |      | 4    |            | 4.0000    |                                                              |                         |    |    |   |   |   |   |
| FN1037  | 0.102                  | 8.100                |          |          |      | 11   |            | 14.3178   | AAL95233.1  Hypothetical cytosolic protein                   |                         |    |    |   |   |   |   |
|         |                        |                      |          |          | 15   | 20   | 15.9903    | 20.0000   |                                                              |                         |    |    |   |   |   |   |
| FN1041  | 0.452                  | 7.665                | 1.624e-1 | 2.198e-1 | 5    | 11   | 7.3030     | 14.3178   | AAL95237.1  Acetyltransferase                                |                         |    |    |   |   |   |   |
|         |                        |                      |          |          | 16   | 19   | 17.0563    | 19.0000   |                                                              |                         |    |    |   |   |   |   |
| FN1042  | 0.070                  | 8.271                | 3.84e-1  | 8.14e-1  | 14   | 10   | 20.4483    | 13.0162   | AAL95238.1  S1 RNA binding domain                            |                         |    |    |   |   |   |   |
|         |                        |                      |          |          | 13   | 23   | 13.8583    | 23.0000   |                                                              |                         |    |    |   |   |   |   |
| FN1048  |                        |                      |          |          |      | 3    |            | 3.9048    | AAL95244.1  Hypothetical membrane-spanning protein           |                         |    |    |   |   |   |   |
|         |                        |                      |          |          |      |      |            |           |                                                              |                         |    |    |   |   |   |   |

Show detected proteins only  
 Show all proteins  
 Filter by category:

Proteins found: 1313

Enter (or paste) list of ORFs

Find ORFs

Test Cutoff

q-Value

p-Value

.005

| Signif | Direction | Applies To   |
|--------|-----------|--------------|
| yes    | +         | ratios, bars |
| no     | n/a       | bars         |
| yes    | -         | ratios, bars |
| yes    | +         | p-, q-Values |
| yes    | -         | p-, q-Values |

Dot Plots Dot Plots



Fn Summary Table FnPg vs Fn FnSg vs Fn FnPgSg vs Fn FnPgSg vs FnPg FnSg vs FnPg FnPgSg vs FnSg Fn Coverage

| Protein | FnSg vs FnPg           |                      |          |          | Raw  |      |         |         | Normalized |      |      |      | Description                                           | Log <sub>2</sub> Ratios |    |    |   |   |   |   |
|---------|------------------------|----------------------|----------|----------|------|------|---------|---------|------------|------|------|------|-------------------------------------------------------|-------------------------|----|----|---|---|---|---|
|         | Log <sub>2</sub> Ratio | Log <sub>2</sub> Sum | q-Value  | p-Value  | FnPg | FnSg | FnPg    | FnSg    | FnPg       | FnSg | FnPg | FnSg |                                                       |                         |    |    |   |   |   |   |
|         |                        |                      |          |          |      |      |         |         |            |      |      |      |                                                       | -6                      | -4 | -2 | 0 | 2 | 4 | 6 |
| FN1050  |                        |                      |          |          | 22   |      | 32.1331 |         |            |      |      |      | AAL95246.1  Lactoylglutathione lyase                  |                         |    |    |   |   |   |   |
|         |                        |                      |          |          | 3    |      | 3.1981  |         |            |      |      |      |                                                       |                         |    |    |   |   |   |   |
| FN1053  |                        |                      |          |          | 8    |      | 11.6848 |         |            |      |      |      | AAL95249.1  Hypothetical protein                      |                         |    |    |   |   |   |   |
|         |                        |                      |          |          |      |      |         |         |            |      |      |      |                                                       |                         |    |    |   |   |   |   |
| FN1055  | 0.082                  | 12.254               | 3.757e-1 | 7.855e-1 | 31   | 59   | 45.2785 | 76.7954 |            |      |      |      | AAL95251.1  Cysteine synthase                         |                         |    |    |   |   |   |   |
|         |                        |                      |          |          | 85   | 67   | 90.6116 | 67.0000 |            |      |      |      |                                                       |                         |    |    |   |   |   |   |
| FN1057  |                        |                      |          |          |      | 17   |         | 22.1275 |            |      |      |      | AAL95253.1  Diamine acetyltransferase                 |                         |    |    |   |   |   |   |
|         |                        |                      |          |          |      | 5    |         | 5.0000  |            |      |      |      |                                                       |                         |    |    |   |   |   |   |
| FN1060  | 0.353                  | 10.498               | 1.031e-2 | 1.79e-3  | 22   | 33   | 32.1331 | 42.9533 |            |      |      |      | AAL95256.1  hypothetical cytosolic protein            |                         |    |    |   |   |   |   |
|         |                        |                      |          |          | 33   | 43   | 35.1786 | 43.0000 |            |      |      |      |                                                       |                         |    |    |   |   |   |   |
| FN1062  | -0.849                 | 11.407               | 7.556e-2 | 4.801e-2 | 60   | 22   | 87.6357 | 28.6356 |            |      |      |      | AAL95258.1  Hydrolase                                 |                         |    |    |   |   |   |   |
|         |                        |                      |          |          | 49   | 49   | 52.2349 | 49.0000 |            |      |      |      |                                                       |                         |    |    |   |   |   |   |
| FN1063  | 0.090                  | 9.667                | 4.069e-1 | 8.958e-1 | 5    | 16   | 7.3030  | 20.8259 |            |      |      |      | AAL95259.1  N-acyl-L-amino acid amidohydrolase        |                         |    |    |   |   |   |   |
|         |                        |                      |          |          | 45   | 38   | 47.9709 | 38.0000 |            |      |      |      |                                                       |                         |    |    |   |   |   |   |
| FN1066  | 0.919                  | 7.358                | 5.128e-2 | 2.383e-2 | 4    | 14   | 5.8424  | 18.2226 |            |      |      |      | AAL95262.1  Exodeoxyribonuclease VII large subunit    |                         |    |    |   |   |   |   |
|         |                        |                      |          |          | 12   | 17   | 12.7922 | 17.0000 |            |      |      |      |                                                       |                         |    |    |   |   |   |   |
| FN1067  | 1.468                  | 11.077               | 6.324e-3 | 8.334e-4 | 12   | 65   | 17.5271 | 84.6051 |            |      |      |      | AAL95263.1  Tetratricopeptide repeat family protein   |                         |    |    |   |   |   |   |
|         |                        |                      |          |          | 36   | 70   | 38.3767 | 70.0000 |            |      |      |      |                                                       |                         |    |    |   |   |   |   |
| FN1068  | 0.658                  | 7.502                | 1.579e-1 | 2.093e-1 | 3    | 16   | 4.3818  | 20.8259 |            |      |      |      | AAL95264.1  Smf protein                               |                         |    |    |   |   |   |   |
|         |                        |                      |          |          | 16   | 13   | 17.0563 | 13.0000 |            |      |      |      |                                                       |                         |    |    |   |   |   |   |
| FN1069  | -0.636                 | 11.338               | 7.169e-2 | 4.331e-2 | 46   | 22   | 67.1874 | 28.6356 |            |      |      |      | AAL95265.1  DNA topoisomerase I                       |                         |    |    |   |   |   |   |
|         |                        |                      |          |          | 56   | 53   | 59.6971 | 53.0000 |            |      |      |      |                                                       |                         |    |    |   |   |   |   |
| FN1070  | -0.052                 | 6.472                |          |          |      | 5    |         | 6.5081  |            |      |      |      | AAL95266.1  Glucose inhibited division protein A      |                         |    |    |   |   |   |   |
|         |                        |                      |          |          | 9    | 12   | 9.5942  | 12.0000 |            |      |      |      |                                                       |                         |    |    |   |   |   |   |
| FN1071  |                        |                      |          |          |      |      |         |         |            |      |      |      | AAL95267.1  Integrase/recombinase                     |                         |    |    |   |   |   |   |
|         |                        |                      |          |          |      | 4    |         | 4.0000  |            |      |      |      |                                                       |                         |    |    |   |   |   |   |
| FN1072  | -0.766                 | 9.973                | 7.671e-2 | 4.95e-2  | 34   | 12   | 49.6602 | 15.6194 |            |      |      |      | AAL95268.1  GTP-binding protein                       |                         |    |    |   |   |   |   |
|         |                        |                      |          |          | 31   | 33   | 33.0466 | 33.0000 |            |      |      |      |                                                       |                         |    |    |   |   |   |   |
| FN1073  | 0.556                  | 5.911                |          |          |      | 6    |         | 7.8097  |            |      |      |      | AAL95269.1  Hypothetical protein                      |                         |    |    |   |   |   |   |
|         |                        |                      |          |          | 6    | 11   | 6.3961  | 11.0000 |            |      |      |      |                                                       |                         |    |    |   |   |   |   |
| FN1074  | 0.373                  | 9.655                | 1.244e-1 | 1.284e-1 | 13   | 22   | 18.9877 | 28.6356 |            |      |      |      | AAL95270.1  Signal recognition particle receptor FtsY |                         |    |    |   |   |   |   |
|         |                        |                      |          |          | 29   | 36   | 30.9146 | 36.0000 |            |      |      |      |                                                       |                         |    |    |   |   |   |   |

Show detected proteins only  
 Show all proteins  
 Filter by category:

Proteins found: 1313

Test Cutoff

| Signif | Direction | Applies To   |
|--------|-----------|--------------|
| yes    | +         | ratios, bars |
| no     | n/a       | bars         |
| yes    | -         | ratios, bars |
| yes    | +         | p-, q-Values |
| yes    | -         |              |

Fn Summary Table FnPg vs Fn FnSg vs Fn FnPgSg vs Fn FnPgSg vs FnPg FnSg vs FnPg FnPgSg vs FnSg Fn Coverage

| Protein       | FnSg vs FnPg           |                      |          |          | Raw  |      | Normalized |          | Description                                                                       | Log <sub>2</sub> Ratios |    |    |   |   |   |   |
|---------------|------------------------|----------------------|----------|----------|------|------|------------|----------|-----------------------------------------------------------------------------------|-------------------------|----|----|---|---|---|---|
|               | Log <sub>2</sub> Ratio | Log <sub>2</sub> Sum | q-Value  | p-Value  | FnPg | FnSg | FnPg       | FnSg     |                                                                                   | -6                      | -4 | -2 | 0 | 2 | 4 | 6 |
| <b>FN1075</b> |                        |                      |          |          |      | 7    |            | 7.0000   | AAL95271.1  Hypothetical protein                                                  |                         |    |    |   |   |   |   |
| <b>FN1077</b> | -1.808                 | 8.636                |          |          |      | 11   |            | 14.3178  | AAL95273.1  Hypothetical protein                                                  |                         |    |    |   |   |   |   |
|               |                        |                      |          |          | 35   | 7    | 37.3107    | 7.0000   |                                                                                   |                         |    |    |   |   |   |   |
| <b>FN1078</b> | -0.405                 | 15.509               | 8.587e-2 | 6.27e-2  | 195  | 144  | 284.8161   | 187.4328 | AAL95274.1  Hypothetical exported 24-amino acid repeat protein                    |                         |    |    |   |   |   |   |
|               |                        |                      |          |          | 199  | 188  | 212.1378   | 188.0000 |                                                                                   |                         |    |    |   |   |   |   |
| <b>FN1079</b> | 0.447                  | 19.158               | 1.624e-1 | 2.199e-1 | 267  | 748  | 389.9790   | 973.6092 | AAL95275.1  Neutrophil-activating protein A                                       |                         |    |    |   |   |   |   |
|               |                        |                      |          |          | 863  | 812  | 919.9746   | 812.0000 |                                                                                   |                         |    |    |   |   |   |   |
| <b>FN1080</b> | 1.682                  | 5.526                | 2.047e-2 | 4.82e-3  | 3    | 11   | 4.3818     | 14.3178  | AAL95276.1  Export ABC transporter                                                |                         |    |    |   |   |   |   |
|               |                        |                      |          |          | 3    | 10   | 3.1981     | 10.0000  |                                                                                   |                         |    |    |   |   |   |   |
| <b>FN1081</b> |                        |                      |          |          | 25   |      | 36.5149    |          | AAL95277.1  unknown                                                               |                         |    |    |   |   |   |   |
| <b>FN1084</b> | -0.983                 | 9.267                | 8.285e-2 | 5.811e-2 | 31   | 11   | 45.2785    | 14.3178  | AAL95280.1  unknown                                                               |                         |    |    |   |   |   |   |
|               |                        |                      |          |          | 23   | 21   | 24.5184    | 21.0000  |                                                                                   |                         |    |    |   |   |   |   |
| <b>FN1085</b> | -0.378                 | 13.731               | 5.469e-2 | 2.697e-2 | 101  | 85   | 147.5201   | 110.6374 | AAL95281.1  4-methyl-5(B-hydroxyethyl)-thiazole monophosphate biosynthesis enzyme |                         |    |    |   |   |   |   |
|               |                        |                      |          |          | 111  | 94   | 118.3281   | 94.0000  |                                                                                   |                         |    |    |   |   |   |   |
| <b>FN1086</b> | 1.459                  | 7.258                |          |          |      | 20   |            | 26.0323  | AAL95282.1  Transporter                                                           |                         |    |    |   |   |   |   |
|               |                        |                      |          |          | 7    | 15   | 7.4621     | 15.0000  |                                                                                   |                         |    |    |   |   |   |   |
| <b>FN1088</b> | 0.677                  | 9.744                | 4.406e-2 | 1.794e-2 | 12   | 30   | 17.5271    | 39.0485  | AAL95284.1  NADH oxidase                                                          |                         |    |    |   |   |   |   |
|               |                        |                      |          |          | 27   | 35   | 28.7825    | 35.0000  |                                                                                   |                         |    |    |   |   |   |   |
| <b>FN1089</b> | 0.747                  | 15.175               | 5.694e-2 | 2.879e-2 | 69   | 164  | 100.7811   | 213.4651 | AAL95285.1  ATP-binding protein (contains P-loop)                                 |                         |    |    |   |   |   |   |
|               |                        |                      |          |          | 184  | 285  | 196.1475   | 285.0000 |                                                                                   |                         |    |    |   |   |   |   |
| <b>FN1091</b> | 0.944                  | 6.713                | 7.9e-2   | 5.261e-2 | 5    | 8    | 7.3030     | 10.4129  | AAL95287.1  Sigma factor sigB regulation protein rsbU                             |                         |    |    |   |   |   |   |
|               |                        |                      |          |          | 7    | 18   | 7.4621     | 18.0000  |                                                                                   |                         |    |    |   |   |   |   |
| <b>FN1092</b> | 0.711                  | 11.981               | 1.841e-1 | 2.727e-1 | 6    | 62   | 8.7636     | 80.7002  | AAL95288.1  Hypothetical protein                                                  |                         |    |    |   |   |   |   |
|               |                        |                      |          |          | 85   | 82   | 90.6116    | 82.0000  |                                                                                   |                         |    |    |   |   |   |   |
| <b>FN1093</b> | -0.487                 | 9.861                | 1.025e-1 | 8.896e-2 | 29   | 15   | 42.3573    | 19.5242  | AAL95289.1  Hypothetical protein                                                  |                         |    |    |   |   |   |   |
|               |                        |                      |          |          | 28   | 32   | 29.8485    | 32.0000  |                                                                                   |                         |    |    |   |   |   |   |
| <b>FN1094</b> | -0.782                 | 9.491                |          |          |      | 13   |            | 16.9210  | AAL95290.1  Dolichol-phosphate mannosyltransferase                                |                         |    |    |   |   |   |   |
|               |                        |                      |          |          | 33   | 24   | 35.1786    | 24.0000  |                                                                                   |                         |    |    |   |   |   |   |
| <b>FN1095</b> |                        |                      |          |          | 8    |      | 11.6848    |          | AAL95291.1  unknown                                                               |                         |    |    |   |   |   |   |

Show detected proteins only  
 Show all proteins  
 Filter by category:

Proteins found: 1313

Enter (or paste) list of ORFs

Find ORFs

Test Cutoff

q-Value p-Value

.005

| Signif | Direction | Applies To   |
|--------|-----------|--------------|
| yes    | +         | ratios, bars |
| no     | n/a       | bars         |
| yes    | -         | ratios, bars |
| yes    | +         | p-, q-Values |
| yes    | -         | p-, q-Values |

Dot Plots Dot Plots

Fn Summary Table FnPg vs Fn FnSg vs Fn FnPgSg vs Fn FnPgSg vs FnPg FnSg vs FnPg FnPgSg vs FnSg Fn Coverage

| Protein | FnSg vs FnPg           |                      |          |          | Raw  |      | Normalized |          | Description                                         | Log <sub>2</sub> Ratios |    |    |   |   |   |   |
|---------|------------------------|----------------------|----------|----------|------|------|------------|----------|-----------------------------------------------------|-------------------------|----|----|---|---|---|---|
|         | Log <sub>2</sub> Ratio | Log <sub>2</sub> Sum | q-Value  | p-Value  | FnPg | FnSg | FnPg       | FnSg     |                                                     |                         |    |    |   |   |   |   |
|         |                        |                      |          |          |      |      |            |          |                                                     | -6                      | -4 | -2 | 0 | 2 | 4 | 6 |
| FN1096  | -0.741                 | 10.242               | 1.873e-1 | 2.807e-1 | 47   | 16   | 68.6480    | 20.8259  | AAL95292.1  Hypothetical protein                    |                         |    |    |   |   |   |   |
|         |                        |                      |          |          | 20   | 33   | 21.3204    | 33.0000  |                                                     |                         |    |    |   |   |   |   |
| FN1097  | -2.247                 | 8.247                |          |          | 26   |      | 37.9755    |          | AAL95293.1  Hypothetical protein                    |                         |    |    |   |   |   |   |
|         |                        |                      |          |          |      | 8    |            | 8.0000   |                                                     |                         |    |    |   |   |   |   |
| FN1101  |                        |                      |          |          |      |      |            |          | AAL95297.1  ATPase                                  |                         |    |    |   |   |   |   |
|         |                        |                      |          |          |      | 8    |            | 8.0000   |                                                     |                         |    |    |   |   |   |   |
| FN1102  |                        |                      |          |          |      |      |            |          | AAL95298.1  tRNA 2'phosphotransferase               |                         |    |    |   |   |   |   |
|         |                        |                      |          |          |      | 10   |            | 10.0000  |                                                     |                         |    |    |   |   |   |   |
| FN1103  | 0.896                  | 11.103               | 2.65e-2  | 7.402e-3 | 23   | 43   | 33.5937    | 55.9695  | AAL95299.1  Excinuclease ABC subunit A              |                         |    |    |   |   |   |   |
|         |                        |                      |          |          | 33   | 72   | 35.1786    | 72.0000  |                                                     |                         |    |    |   |   |   |   |
| FN1105  | -0.962                 | 11.985               | 1.112e-1 | 1.035e-1 | 83   | 34   | 121.2294   | 44.2550  | AAL95301.1  Hypothetical protein                    |                         |    |    |   |   |   |   |
|         |                        |                      |          |          | 53   | 47   | 56.4990    | 47.0000  |                                                     |                         |    |    |   |   |   |   |
| FN1106  | -0.118                 | 12.041               | 2.593e-1 | 4.571e-1 | 51   | 55   | 74.4904    | 71.5889  | AAL95302.1  L-serine dehydratase                    |                         |    |    |   |   |   |   |
|         |                        |                      |          |          | 57   | 53   | 60.7631    | 53.0000  |                                                     |                         |    |    |   |   |   |   |
| FN1111  |                        |                      |          |          |      |      |            | 14.3178  | AAL95307.1  Dipeptide-binding protein               |                         |    |    |   |   |   |   |
|         |                        |                      |          |          |      | 17   |            | 17.0000  |                                                     |                         |    |    |   |   |   |   |
| FN1117  | -1.259                 | 9.243                | 1.266e-1 | 1.329e-1 | 39   | 16   | 56.9632    | 20.8259  | AAL95313.1  LSU ribosomal protein L21P              |                         |    |    |   |   |   |   |
|         |                        |                      |          |          | 18   | 11   | 19.1883    | 11.0000  |                                                     |                         |    |    |   |   |   |   |
| FN1119  | -1.638                 | 11.491               | 1.031e-1 | 8.995e-2 | 96   | 16   | 140.2172   | 20.8259  | AAL95315.1  LSU ribosomal protein L27P              |                         |    |    |   |   |   |   |
|         |                        |                      |          |          | 46   | 40   | 49.0369    | 40.0000  |                                                     |                         |    |    |   |   |   |   |
| FN1120  | -0.049                 | 16.232               | 3.515e-1 | 7.078e-1 | 166  | 207  | 242.4589   | 269.4346 | AAL95316.1  Phosphoenolpyruvate carboxykinase (ATP) |                         |    |    |   |   |   |   |
|         |                        |                      |          |          | 302  | 276  | 321.9378   | 276.0000 |                                                     |                         |    |    |   |   |   |   |
| FN1121  | 0.209                  | 12.124               | 1.857e-1 | 2.765e-1 | 34   | 52   | 49.6602    | 67.6841  | AAL95317.1  hypothetical cytosolic protein          |                         |    |    |   |   |   |   |
|         |                        |                      |          |          | 70   | 76   | 74.6213    | 76.0000  |                                                     |                         |    |    |   |   |   |   |
| FN1122  | 0.184                  | 12.114               | 2.358e-1 | 3.999e-1 | 41   | 66   | 59.8844    | 85.9067  | AAL95318.1  Long-chain-fatty-acid--CoA ligase       |                         |    |    |   |   |   |   |
|         |                        |                      |          |          | 61   | 56   | 65.0272    | 56.0000  |                                                     |                         |    |    |   |   |   |   |
| FN1123  | 0.496                  | 6.048                | 2.256e-1 | 3.737e-1 | 5    | 11   | 7.3030     | 14.3178  | AAL95319.1  Thioredoxin-like protein                |                         |    |    |   |   |   |   |
|         |                        |                      |          |          | 6    | 5    | 6.3961     | 5.0000   |                                                     |                         |    |    |   |   |   |   |
| FN1124  | 0.763                  | 16.378               | 1.047e-2 | 1.829e-3 | 133  | 286  | 194.2592   | 372.2623 | AAL95320.1  Outer membrane porin F                  |                         |    |    |   |   |   |   |
|         |                        |                      |          |          | 238  | 388  | 253.7126   | 388.0000 |                                                     |                         |    |    |   |   |   |   |
| FN1125  | 0.357                  | 12.772               | 2.829e-1 | 5.15e-1  | 18   | 84   | 26.2907    | 109.3358 | AAL95321.1  LemA protein                            |                         |    |    |   |   |   |   |
|         |                        |                      |          |          | 114  | 80   | 121.5262   | 80.0000  |                                                     |                         |    |    |   |   |   |   |

Show detected proteins only  
 Show all proteins  
 Filter by category:

Proteins found: 1313

Test Cutoff

| Signif      | Direction | Applies To |
|-------------|-----------|------------|
| red         | yes       | +          |
| yellow      | no        | n/a        |
| green       | yes       | -          |
| pink        | yes       | +          |
| light green | yes       | -          |

Applies To: ratios, bars; ratios, bars; p-, q-Values

Fn Summary Table FnPg vs Fn FnSg vs Fn FnPgSg vs Fn FnPgSg vs FnPg FnSg vs FnPg FnPgSg vs FnSg Fn Coverage

| Protein | FnSg vs FnPg           |                      |          |          | Raw  |      |          |          | Normalized                                                     |      |      |      | Description | Log <sub>2</sub> Ratios |    |    |   |   |   |   |
|---------|------------------------|----------------------|----------|----------|------|------|----------|----------|----------------------------------------------------------------|------|------|------|-------------|-------------------------|----|----|---|---|---|---|
|         | Log <sub>2</sub> Ratio | Log <sub>2</sub> Sum | q-Value  | p-Value  | FnPg | FnSg | FnPg     | FnSg     | FnPg                                                           | FnSg | FnPg | FnSg |             |                         |    |    |   |   |   |   |
|         |                        |                      |          |          |      |      |          |          |                                                                |      |      |      |             | -6                      | -4 | -2 | 0 | 2 | 4 | 6 |
| FN1127  | -0.497                 | 12.635               | 1.423e-1 | 1.688e-1 | 83   | 54   | 121.2294 | 70.2873  | AAL95323.1  Hypothetical membrane-spanning protein             |      |      |      |             |                         |    |    |   |   |   |   |
|         |                        |                      |          |          | 64   | 64   | 68.2252  | 64.0000  |                                                                |      |      |      | ■           |                         |    |    |   |   |   |   |
| FN1128  | -0.734                 | 15.860               | 9.162e-2 | 7.223e-2 | 270  | 140  | 394.3608 | 182.2263 | AAL95324.1  Acylamino-acid-releasing enzyme                    |      |      |      |             |                         |    |    |   |   |   |   |
|         |                        |                      |          |          | 220  | 196  | 234.5242 | 196.0000 |                                                                |      |      |      | ■           |                         |    |    |   |   |   |   |
| FN1129  | 0.341                  | 5.696                |          |          |      | 4    |          | 5.2065   | AAL95325.1  Chromosome partition protein smc                   |      |      |      |             |                         |    |    |   |   |   |   |
|         |                        |                      |          |          | 6    | 11   | 6.3961   | 11.0000  |                                                                |      |      |      | ■           |                         |    |    |   |   |   |   |
| FN1130  | 1.045                  | 5.874                |          |          |      |      |          |          | AAL95326.1  Tetraacyldisaccharide 4'-kinase                    |      |      |      |             |                         |    |    |   |   |   |   |
|         |                        |                      |          |          | 5    | 11   | 5.3301   | 11.0000  |                                                                |      |      |      | ■           |                         |    |    |   |   |   |   |
| FN1131  | -0.985                 | 6.600                |          |          |      |      |          |          | AAL95327.1  Hypothetical protein                               |      |      |      |             |                         |    |    |   |   |   |   |
|         |                        |                      |          |          | 13   | 7    | 13.8583  | 7.0000   |                                                                |      |      |      | ■           |                         |    |    |   |   |   |   |
| FN1133  | -0.495                 | 10.411               | 2.427e-1 | 4.173e-1 | 14   | 27   | 20.4483  | 35.1436  | AAL95329.1  N-acetylglucosamine-6-phosphate deacetylase        |      |      |      |             |                         |    |    |   |   |   |   |
|         |                        |                      |          |          | 63   | 27   | 67.1592  | 27.0000  |                                                                |      |      |      | ■           |                         |    |    |   |   |   |   |
| FN1134  | -1.864                 | 7.864                |          |          | 26   |      | 37.9755  |          | AAL95330.1  Hypothetical cytosolic protein                     |      |      |      |             |                         |    |    |   |   |   |   |
|         |                        |                      |          |          | 19   | 8    | 20.2544  | 8.0000   |                                                                |      |      |      | ■           |                         |    |    |   |   |   |   |
| FN1135  | -0.761                 | 14.742               | 1.829e-1 | 2.695e-1 | 225  | 107  | 328.6340 | 139.2730 | AAL95331.1  Phosphonates-binding protein                       |      |      |      |             |                         |    |    |   |   |   |   |
|         |                        |                      |          |          | 96   | 115  | 102.3379 | 115.0000 |                                                                |      |      |      | ■           |                         |    |    |   |   |   |   |
| FN1136  | 0.062                  | 9.417                |          |          |      | 18   |          | 23.4291  | AAL95332.1  Phosphonates transport ATP-binding protein phnC    |      |      |      |             |                         |    |    |   |   |   |   |
|         |                        |                      |          |          | 24   | 30   | 25.5845  | 30.0000  |                                                                |      |      |      | ■           |                         |    |    |   |   |   |   |
| FN1138  | -0.414                 | 18.374               | 1.623e-1 | 2.196e-1 | 349  | 491  | 509.7478 | 639.0937 | AAL95334.1  Hypothetical cytosolic protein                     |      |      |      |             |                         |    |    |   |   |   |   |
|         |                        |                      |          |          | 784  | 371  | 835.7591 | 371.0000 |                                                                |      |      |      | ■           |                         |    |    |   |   |   |   |
| FN1139  | 0.924                  | 13.686               | 1.044e-1 | 9.191e-2 | 20   | 107  | 29.2119  | 139.2730 | AAL95335.1  Activator of (R)-2-hydroxyglutaryl-CoA dehydratase |      |      |      |             |                         |    |    |   |   |   |   |
|         |                        |                      |          |          | 129  | 177  | 137.5165 | 177.0000 |                                                                |      |      |      | ■           |                         |    |    |   |   |   |   |
| FN1140  | -0.276                 | 9.196                |          |          |      | 10   |          | 13.0162  | AAL95336.1  hypothetical protein                               |      |      |      |             |                         |    |    |   |   |   |   |
|         |                        |                      |          |          | 25   | 31   | 26.6505  | 31.0000  |                                                                |      |      |      | ■           |                         |    |    |   |   |   |   |
| FN1142  | 0.309                  | 5.137                |          |          |      | 4    |          | 5.2065   | AAL95338.1  Oxygen-independent coproporphyrinogen III oxidase  |      |      |      |             |                         |    |    |   |   |   |   |
|         |                        |                      |          |          | 5    | 8    | 5.3301   | 8.0000   |                                                                |      |      |      | ■           |                         |    |    |   |   |   |   |
| FN1143  | 1.064                  | 14.967               | 6.498e-2 | 3.608e-2 | 41   | 244  | 59.8844  | 317.5944 | AAL95339.1  Glucosamine-6-phosphate isomerase                  |      |      |      |             |                         |    |    |   |   |   |   |
|         |                        |                      |          |          | 176  | 200  | 187.6194 | 200.0000 |                                                                |      |      |      | ■           |                         |    |    |   |   |   |   |
| FN1144  | 1.001                  | 13.002               | 6.259e-2 | 3.377e-2 | 22   | 107  | 32.1331  | 139.2730 | AAL95340.1  Hypothetical Exported Protein                      |      |      |      |             |                         |    |    |   |   |   |   |
|         |                        |                      |          |          | 90   | 117  | 95.9417  | 117.0000 |                                                                |      |      |      | ■           |                         |    |    |   |   |   |   |
| FN1145  | -0.101                 | 8.796                | 3.956e-1 | 8.544e-1 | 8    | 9    | 11.6848  | 11.7145  | AAL95341.1  Oligoendopeptidase F                               |      |      |      |             |                         |    |    |   |   |   |   |
|         |                        |                      |          |          | 30   | 29   | 31.9806  | 29.0000  |                                                                |      |      |      | ■           |                         |    |    |   |   |   |   |

Show detected proteins only  
 Show all proteins  
 Filter by category:

Proteins found: 1313

Enter (or paste) list of ORFs

Find ORFs

Test Cutoff

q-Value p-Value

.005

| Signif | Direction | Applies To   |
|--------|-----------|--------------|
| ■      | yes +     | ratios, bars |
| ■      | no n/a    | bars         |
| ■      | yes -     | ratios, bars |
| ■      | yes +     | p-, q-Values |
| ■      | yes -     | p-, q-Values |

Dot Plots Dot Plots

Fn Summary Table FnPg vs Fn FnSg vs Fn FnPgSg vs Fn FnPgSg vs FnPg FnSg vs FnPg FnPgSg vs FnSg Fn Coverage

| Protein | FnSg vs FnPg           |                      |          |          | Raw  |      | Normalized |           | Description                                                    | Log <sub>2</sub> Ratios |    |    |   |   |   |   |
|---------|------------------------|----------------------|----------|----------|------|------|------------|-----------|----------------------------------------------------------------|-------------------------|----|----|---|---|---|---|
|         | Log <sub>2</sub> Ratio | Log <sub>2</sub> Sum | q-Value  | p-Value  | FnPg | FnSg | FnPg       | FnSg      |                                                                | -6                      | -4 | -2 | 0 | 2 | 4 | 6 |
| FN1146  |                        |                      |          |          | 6    |      | 8.7636     |           | AAL95342.1  Hypothetical exported 24-amino acid repeat protein |                         |    |    |   |   |   |   |
| FN1148  | 0.111                  | 11.539               | 4.044e-1 | 8.864e-1 | 4    | 41   | 5.8424     | 53.3663   | AAL95344.1  Serine/threonine sodium symporter                  |                         |    |    |   |   |   |   |
| FN1149  | 0.693                  | 7.151                | 2.336e-3 | 1.566e-4 | 7    | 11   | 10.2242    | 14.3178   | AAL95345.1  ATP-dependent nuclease subunit A                   |                         |    |    |   |   |   |   |
| FN1150  | 0.715                  | 4.900                |          |          |      |      |            |           | AAL95346.1  unknown                                            |                         |    |    |   |   |   |   |
| FN1152  | -0.055                 | 13.383               | 4.011e-1 | 8.743e-1 | 45   | 79   | 65.7268    | 102.8277  | AAL95348.1  Aspartate aminotransferase                         |                         |    |    |   |   |   |   |
| FN1154  | -1.063                 | 7.766                |          |          |      |      |            |           | AAL95350.1  Ribonuclease BN                                    |                         |    |    |   |   |   |   |
| FN1155  |                        |                      |          |          |      |      |            |           | AAL95351.1  Cell division protein ftsI                         |                         |    |    |   |   |   |   |
| FN1156  |                        |                      |          |          |      |      |            |           | AAL95352.1  Primosomal protein N'                              |                         |    |    |   |   |   |   |
| FN1159  | 0.294                  | 14.595               | 1.371e-1 | 1.56e-1  | 77   | 137  | 112.4659   | 178.3215  | AAL95355.1  Fructose-1,6-bisphosphatase                        |                         |    |    |   |   |   |   |
| FN1160  | 1.333                  | 4.687                |          |          |      |      |            |           | AAL95356.1  SWF/SNF family helicase                            |                         |    |    |   |   |   |   |
| FN1161  | 1.278                  | 4.632                |          |          |      |      |            |           | AAL95357.1  Glutamate racemase                                 |                         |    |    |   |   |   |   |
| FN1162  | -1.558                 | 7.411                |          |          |      |      |            |           | AAL95358.1  Hydroxyacylglutathione hydrolase                   |                         |    |    |   |   |   |   |
| FN1163  | -0.514                 | 11.650               | 1.768e-1 | 2.547e-1 | 30   | 46   | 43.8179    | 59.8744   | AAL95359.1  Thioredoxin reductase                              |                         |    |    |   |   |   |   |
| FN1164  | 0.278                  | 7.046                | 1.106e-1 | 1.026e-1 | 7    | 11   | 10.2242    | 14.3178   | AAL95360.1  Glucokinase                                        |                         |    |    |   |   |   |   |
| FN1165  | 0.612                  | 23.817               | 5.094e-2 | 2.352e-2 | 2224 | 4182 | 3248.3644  | 5443.3605 | AAL95361.1  D-galactose-binding protein                        |                         |    |    |   |   |   |   |
| FN1166  | 0.377                  | 15.375               | 1.558e-3 | 7.615e-5 | 128  | 178  | 186.9562   | 231.6877  | AAL95362.1  Galactoside transport ATP-binding protein mglA     |                         |    |    |   |   |   |   |

Show detected proteins only  
 Show all proteins  
 Filter by category:

Proteins found: 1313

Enter (or paste) list of ORFs

Find ORFs

Test Cutoff

q-Value .005

p-Value

| Signif | Direction | Applies To   |
|--------|-----------|--------------|
| yes    | +         | ratios, bars |
| no     | n/a       | bars         |
| yes    | -         | ratios, bars |
| yes    | +         | p-, q-Values |
| yes    | -         |              |

Dot Plots Dot Plots

Fn Summary Table FnPg vs Fn FnSg vs Fn FnPgSg vs Fn FnPgSg vs FnPg FnSg vs FnPg FnPgSg vs FnSg Fn Coverage

| Protein | FnSg vs FnPg           |                      |          |          | Raw  |      |           |           | Normalized |      |      |      | Description                                                    | Log <sub>2</sub> Ratios |    |    |   |   |   |   |
|---------|------------------------|----------------------|----------|----------|------|------|-----------|-----------|------------|------|------|------|----------------------------------------------------------------|-------------------------|----|----|---|---|---|---|
|         | Log <sub>2</sub> Ratio | Log <sub>2</sub> Sum | q-Value  | p-Value  | FnPg | FnSg | FnPg      | FnSg      | FnPg       | FnSg | FnPg | FnSg |                                                                | -6                      | -4 | -2 | 0 | 2 | 4 | 6 |
| FN1167  |                        |                      |          |          |      | 8    |           | 10.4129   |            |      |      |      | AAL95363.1  Galactoside transport system permease protein mgIC |                         |    |    |   |   |   |   |
|         |                        |                      |          |          |      | 13   |           | 13.0000   |            |      |      |      |                                                                |                         |    |    |   |   |   |   |
| FN1169  | 0.278                  | 16.921               | 1.73e-1  | 2.456e-1 | 260  | 245  | 379.7548  | 318.8961  |            |      |      |      | AAL95365.1  L-lactate dehydrogenase                            |                         |    |    |   |   |   |   |
|         |                        |                      |          |          | 244  | 457  | 260.1087  | 457.0000  |            |      |      |      |                                                                |                         |    |    |   |   |   |   |
| FN1170  | -0.142                 | 25.777               | 3.064e-1 | 5.768e-1 | 6878 | 5624 | 10045.975 | 7320.2915 |            |      |      |      | AAL95366.1  Pyruvate-flavodoxin oxidoreductase                 |                         |    |    |   |   |   |   |
|         |                        |                      |          |          | 5525 | 7117 | 5889.7565 | 7117.0000 |            |      |      |      |                                                                |                         |    |    |   |   |   |   |
| FN1171  | -0.222                 | 20.052               | 2.133e-1 | 3.435e-1 | 936  | 673  | 1367.1174 | 875.9879  |            |      |      |      | AAL95367.1  Acetate kinase                                     |                         |    |    |   |   |   |   |
|         |                        |                      |          |          | 830  | 1055 | 884.7960  | 1055.0000 |            |      |      |      |                                                                |                         |    |    |   |   |   |   |
| FN1172  | 0.030                  | 18.163               | 3.338e-1 | 6.54e-1  | 348  | 397  | 508.2872  | 516.7418  |            |      |      |      | AAL95368.1  Phosphate acetyltransferase                        |                         |    |    |   |   |   |   |
|         |                        |                      |          |          | 529  | 578  | 563.9242  | 578.0000  |            |      |      |      |                                                                |                         |    |    |   |   |   |   |
| FN1176  |                        |                      |          |          | 4    |      | 5.8424    |           |            |      |      |      | AAL95372.1  Hypothetical cytosolic protein                     |                         |    |    |   |   |   |   |
|         |                        |                      |          |          |      |      |           |           |            |      |      |      |                                                                |                         |    |    |   |   |   |   |
| FN1179  | -1.769                 | 6.939                |          |          | 14   |      | 20.4483   |           |            |      |      |      | AAL95375.1  ATP-dependent RNA helicase                         |                         |    |    |   |   |   |   |
|         |                        |                      |          |          |      | 6    | 6.0000    |           |            |      |      |      |                                                                |                         |    |    |   |   |   |   |
| FN1180  | -1.061                 | 6.676                |          |          | 10   |      | 14.6060   |           |            |      |      |      | AAL95376.1  Hypothetical protein                               |                         |    |    |   |   |   |   |
|         |                        |                      |          |          |      | 7    | 7.0000    |           |            |      |      |      |                                                                |                         |    |    |   |   |   |   |
| FN1181  | -2.344                 | 14.291               | 1.54e-1  | 2.001e-1 | 404  | 42   | 590.0806  | 54.6679   |            |      |      |      | AAL95377.1  unknown                                            |                         |    |    |   |   |   |   |
|         |                        |                      |          |          | 45   | 71   | 47.9709   | 71.0000   |            |      |      |      |                                                                |                         |    |    |   |   |   |   |
| FN1182  | -1.284                 | 6.453                |          |          | 10   |      | 14.6060   |           |            |      |      |      | AAL95378.1  Hypothetical protein                               |                         |    |    |   |   |   |   |
|         |                        |                      |          |          |      | 6    | 6.0000    |           |            |      |      |      |                                                                |                         |    |    |   |   |   |   |
| FN1183  | -0.176                 | 7.933                | 3.097e-1 | 5.857e-1 | 14   | 8    | 20.4483   | 10.4129   |            |      |      |      | AAL95379.1  Hypothetical cytosolic protein                     |                         |    |    |   |   |   |   |
|         |                        |                      |          |          | 12   | 19   | 12.7922   | 19.0000   |            |      |      |      |                                                                |                         |    |    |   |   |   |   |
| FN1184  |                        |                      |          |          | 4    |      | 5.8424    |           |            |      |      |      | AAL95380.1  Hypothetical protein                               |                         |    |    |   |   |   |   |
|         |                        |                      |          |          |      |      |           |           |            |      |      |      |                                                                |                         |    |    |   |   |   |   |
| FN1185  | -0.689                 | 10.673               | 1.81e-1  | 2.649e-1 | 52   | 22   | 75.9510   | 28.6356   |            |      |      |      | AAL95381.1  SIR2 family protein                                |                         |    |    |   |   |   |   |
|         |                        |                      |          |          | 25   | 35   | 26.6505   | 35.0000   |            |      |      |      |                                                                |                         |    |    |   |   |   |   |
| FN1186  | 0.240                  | 17.171               | 3.387e-1 | 6.688e-1 | 82   | 308  | 119.7688  | 400.8979  |            |      |      |      | AAL95382.1  Amidohydrolase                                     |                         |    |    |   |   |   |   |
|         |                        |                      |          |          | 551  | 434  | 587.3766  | 434.0000  |            |      |      |      |                                                                |                         |    |    |   |   |   |   |
| FN1187  | 0.650                  | 12.196               | 2.121e-1 | 3.408e-1 | 7    | 85   | 10.2242   | 110.6374  |            |      |      |      | AAL95383.1  Amino acid-binding protein                         |                         |    |    |   |   |   |   |
|         |                        |                      |          |          | 93   | 61   | 99.1398   | 61.0000   |            |      |      |      |                                                                |                         |    |    |   |   |   |   |
| FN1188  | 1.162                  | 12.256               | 7.563e-2 | 4.809e-2 | 10   | 87   | 14.6060   | 113.2406  |            |      |      |      | AAL95384.1  Hypothetical protein                               |                         |    |    |   |   |   |   |
|         |                        |                      |          |          | 74   | 96   | 78.8854   | 96.0000   |            |      |      |      |                                                                |                         |    |    |   |   |   |   |

Show detected proteins only  
 Show all proteins  
 Filter by category:

Proteins found: 1313

Enter (or paste) list of ORFs

Find ORFs

Test Cutoff

q-Value

p-Value

.005

| Signif | Direction | Applies To   |
|--------|-----------|--------------|
| yes    | +         | ratios, bars |
| no     | n/a       | bars         |
| yes    | -         | ratios, bars |
| yes    | +         | p-, q-Values |
| yes    | -         | p-, q-Values |

Dot Plots  Dot Plots

Fn Summary Table FnPg vs Fn FnSg vs Fn FnPgSg vs Fn FnPgSg vs FnPg FnSg vs FnPg FnPgSg vs FnSg Fn Coverage

| Protein | FnSg vs FnPg           |                      |          |          | Raw  |      | Normalized |          | Description                                      | Log <sub>2</sub> Ratios |    |    |   |   |   |   |
|---------|------------------------|----------------------|----------|----------|------|------|------------|----------|--------------------------------------------------|-------------------------|----|----|---|---|---|---|
|         | Log <sub>2</sub> Ratio | Log <sub>2</sub> Sum | q-Value  | p-Value  | FnPg | FnSg | FnPg       | FnSg     |                                                  | -6                      | -4 | -2 | 0 | 2 | 4 | 6 |
| FN1189  | -0.118                 | 12.067               | 2.978e-1 | 5.538e-1 | 46   | 59   | 67.1874    | 76.7954  | AAL95385.1  Hypothetical protein                 |                         |    |    |   |   |   |   |
|         |                        |                      |          |          | 65   | 49   | 69.2913    | 49.0000  |                                                  |                         |    |    |   |   |   |   |
| FN1190  | 1.038                  | 13.812               | 8.211e-5 | 4.721e-7 | 54   | 135  | 78.8722    | 175.7182 | AAL95386.1  Probable cadmium-transporting ATPase |                         |    |    |   |   |   |   |
|         |                        |                      |          |          | 83   | 168  | 88.4796    | 168.0000 |                                                  |                         |    |    |   |   |   |   |
| FN1191  | 1.187                  | 12.355               |          |          |      | 104  |            | 135.3681 | AAL95387.1  unknown                              |                         |    |    |   |   |   |   |
|         |                        |                      |          |          | 45   | 83   | 47.9709    | 83.0000  |                                                  |                         |    |    |   |   |   |   |
| FN1192  | 0.791                  | 18.046               | 2.599e-2 | 7.173e-3 | 227  | 451  | 331.5552   | 587.0291 | AAL95388.1  unknown                              |                         |    |    |   |   |   |   |
|         |                        |                      |          |          | 431  | 782  | 459.4543   | 782.0000 |                                                  |                         |    |    |   |   |   |   |
| FN1198  | 0.898                  | 11.084               | 1.113e-2 | 2.001e-3 | 19   | 47   | 27.7513    | 61.1760  | AAL95394.1  Transporter                          |                         |    |    |   |   |   |   |
|         |                        |                      |          |          | 38   | 66   | 40.5087    | 66.0000  |                                                  |                         |    |    |   |   |   |   |
| FN1200  | -0.742                 | 17.108               |          |          |      | 253  |            | 329.3090 | AAL95396.1  Hypothetical protein                 |                         |    |    |   |   |   |   |
|         |                        |                      |          |          | 456  | 252  | 486.1048   | 252.0000 |                                                  |                         |    |    |   |   |   |   |
| FN1201  |                        |                      |          |          |      |      |            |          | AAL95397.1  unknown                              |                         |    |    |   |   |   |   |
|         |                        |                      |          |          |      | 7    |            | 7.0000   |                                                  |                         |    |    |   |   |   |   |
| FN1202  | -0.197                 | 9.533                | 2.819e-1 | 5.125e-1 | 18   | 26   | 26.2907    | 33.8420  | AAL95398.1  NH(3)-dependent NAD(+) synthetase    |                         |    |    |   |   |   |   |
|         |                        |                      |          |          | 30   | 17   | 31.9806    | 17.0000  |                                                  |                         |    |    |   |   |   |   |
| FN1203  | 0.305                  | 6.482                | 2.465e-1 | 4.265e-1 | 8    | 10   | 11.6848    | 13.0162  | AAL95399.1  GTP-binding protein                  |                         |    |    |   |   |   |   |
|         |                        |                      |          |          | 5    | 8    | 5.3301     | 8.0000   |                                                  |                         |    |    |   |   |   |   |
| FN1204  | 0.124                  | 7.786                | 2.531e-1 | 4.425e-1 | 10   | 10   | 14.6060    | 13.0162  | AAL95400.1  Methyltransferase                    |                         |    |    |   |   |   |   |
|         |                        |                      |          |          | 13   | 18   | 13.8583    | 18.0000  |                                                  |                         |    |    |   |   |   |   |
| FN1205  | -0.078                 | 11.654               | 4.044e-1 | 8.864e-1 | 20   | 58   | 29.2119    | 75.4938  | AAL95401.1  Protease                             |                         |    |    |   |   |   |   |
|         |                        |                      |          |          | 82   | 35   | 87.4136    | 35.0000  |                                                  |                         |    |    |   |   |   |   |
| FN1208  | 0.975                  | 7.199                |          |          | 6    |      | 8.7636     |          | AAL95404.1  1-deoxyxylulose-5-phosphate synthase |                         |    |    |   |   |   |   |
|         |                        |                      |          |          | 8    | 17   | 8.5282     | 17.0000  |                                                  |                         |    |    |   |   |   |   |
| FN1209  | 0.487                  | 8.485                |          |          |      | 16   |            | 20.8259  | AAL95405.1  Hypothetical RNA binding protein     |                         |    |    |   |   |   |   |
|         |                        |                      |          |          | 15   | 24   | 15.9903    | 24.0000  |                                                  |                         |    |    |   |   |   |   |
| FN1210  | 0.467                  | 10.567               | 1.481e-1 | 1.847e-1 | 22   | 45   | 32.1331    | 58.5727  | AAL95406.1  Metal dependent hydrolase            |                         |    |    |   |   |   |   |
|         |                        |                      |          |          | 32   | 33   | 34.1126    | 33.0000  |                                                  |                         |    |    |   |   |   |   |
| FN1211  | 1.001                  | 6.553                | 6.418e-2 | 3.53e-2  | 5    | 8    | 7.3030     | 10.4129  | AAL95407.1  Cell division protein ftsI           |                         |    |    |   |   |   |   |
|         |                        |                      |          |          | 6    | 17   | 6.3961     | 17.0000  |                                                  |                         |    |    |   |   |   |   |
| FN1213  | 0.842                  | 11.063               | 8.008e-2 | 5.416e-2 | 13   | 46   | 18.9877    | 59.8744  | AAL95409.1  Hypothetical protein                 |                         |    |    |   |   |   |   |
|         |                        |                      |          |          | 47   | 64   | 50.1029    | 64.0000  |                                                  |                         |    |    |   |   |   |   |

Show detected proteins only  
 Show all proteins  
 Filter by category:

Proteins found: 1313

Test Cutoff

| Signif | Direction | Applies To   |
|--------|-----------|--------------|
| yes    | +         | ratios, bars |
| no     | n/a       | bars         |
| yes    | -         | ratios, bars |
| yes    | +         | p-, q-Values |
| yes    | -         |              |

Fn Summary Table FnPg vs Fn FnSg vs Fn FnPgSg vs Fn FnPgSg vs FnPg FnSg vs FnPg FnPgSg vs FnSg Fn Coverage

| Protein | FnSg vs FnPg           |                      |          |          | Raw  |      | Normalized |           | Description                                                                    | Log <sub>2</sub> Ratios |    |    |   |   |   |   |
|---------|------------------------|----------------------|----------|----------|------|------|------------|-----------|--------------------------------------------------------------------------------|-------------------------|----|----|---|---|---|---|
|         | Log <sub>2</sub> Ratio | Log <sub>2</sub> Sum | q-Value  | p-Value  | FnPg | FnSg | FnPg       | FnSg      |                                                                                |                         |    |    |   |   |   |   |
|         |                        |                      |          |          |      |      |            |           |                                                                                | -6                      | -4 | -2 | 0 | 2 | 4 | 6 |
| FN1216  | 0.487                  | 7.681                | 7.205e-2 | 4.373e-2 | 10   | 13   | 14.6060    | 16.9210   | AAL95412.1  RRF2 family protein                                                |                         |    |    |   |   |   |   |
|         |                        |                      |          |          | 9    | 17   | 9.5942     | 17.0000   |                                                                                |                         |    |    |   |   |   |   |
| FN1217  | 1.625                  | 7.424                |          |          |      | 20   |            | 26.0323   | AAL95413.1  Holliday junction DNA helicase ruvB                                |                         |    |    |   |   |   |   |
|         |                        |                      |          |          | 7    | 20   | 7.4621     | 20.0000   |                                                                                |                         |    |    |   |   |   |   |
| FN1218  | 0.374                  | 7.959                |          |          |      | 13   |            | 16.9210   | AAL95414.1  unknown                                                            |                         |    |    |   |   |   |   |
|         |                        |                      |          |          | 13   | 19   | 13.8583    | 19.0000   |                                                                                |                         |    |    |   |   |   |   |
| FN1219  | -0.275                 | 8.213                | 1.35e-1  | 1.511e-1 | 15   | 11   | 21.9089    | 14.3178   | AAL95415.1  Hypothetical protein                                               |                         |    |    |   |   |   |   |
|         |                        |                      |          |          | 15   | 17   | 15.9903    | 17.0000   |                                                                                |                         |    |    |   |   |   |   |
| FN1220  | 0.289                  | 15.621               | 1.709e-1 | 2.404e-1 | 127  | 150  | 185.4956   | 195.2425  | AAL95416.1  Cysteine synthase                                                  |                         |    |    |   |   |   |   |
|         |                        |                      |          |          | 207  | 301  | 220.6660   | 301.0000  |                                                                                |                         |    |    |   |   |   |   |
| FN1221  | 0.497                  | 9.241                | 2.284e-1 | 3.808e-1 | 5    | 28   | 7.3030     | 36.4453   | AAL95417.1  Hypothetical protein                                               |                         |    |    |   |   |   |   |
|         |                        |                      |          |          | 32   | 22   | 34.1126    | 22.0000   |                                                                                |                         |    |    |   |   |   |   |
| FN1222  | -1.562                 | 6.206                |          |          | 10   |      | 14.6060    |           | AAL95418.1  Hypothetical protein                                               |                         |    |    |   |   |   |   |
|         |                        |                      |          |          | 14   | 5    | 14.9243    | 5.0000    |                                                                                |                         |    |    |   |   |   |   |
| FN1223  | -1.625                 | 11.368               | 2.843e-2 | 8.322e-3 | 74   | 25   | 108.0841   | 32.5404   | AAL95419.1  Oxygen-insensitive NAD(P)H nitroreductase                          |                         |    |    |   |   |   |   |
|         |                        |                      |          |          | 68   | 26   | 72.4893    | 26.0000   |                                                                                |                         |    |    |   |   |   |   |
| FN1224  | -0.398                 | 13.009               | 2.364e-1 | 4.016e-1 | 42   | 47   | 61.3450    | 61.1760   | AAL95420.1  2-dehydro-3-deoxyphosphooctonate aldolase                          |                         |    |    |   |   |   |   |
|         |                        |                      |          |          | 138  | 97   | 147.1107   | 97.0000   |                                                                                |                         |    |    |   |   |   |   |
| FN1225  | -0.187                 | 13.251               | 3.249e-1 | 6.283e-1 | 45   | 60   | 65.7268    | 78.0970   | AAL95421.1  UDP-N-acetylmuramoyl-L-alanyl-D-glutamate--meso-lanthionine ligase |                         |    |    |   |   |   |   |
|         |                        |                      |          |          | 136  | 107  | 144.9786   | 107.0000  |                                                                                |                         |    |    |   |   |   |   |
| FN1226  | 1.490                  | 13.992               | 2.328e-2 | 5.925e-3 | 24   | 195  | 35.0543    | 253.8152  | AAL95422.1  Uracil-DNA glycosylase                                             |                         |    |    |   |   |   |   |
|         |                        |                      |          |          | 110  | 174  | 117.2621   | 174.0000  |                                                                                |                         |    |    |   |   |   |   |
| FN1231  | 0.471                  | 19.642               | 2.362e-1 | 4.012e-1 | 166  | 788  | 242.4589   | 1025.6739 | AAL95427.1  Inosine-5'-monophosphate dehydrogenase                             |                         |    |    |   |   |   |   |
|         |                        |                      |          |          | 1214 | 1104 | 1294.1474  | 1104.0000 |                                                                                |                         |    |    |   |   |   |   |
| FN1233  |                        |                      |          |          |      | 6    |            | 6.0000    | AAL95429.1  Putative NAD(P)H oxidoreductase                                    |                         |    |    |   |   |   |   |
| FN1234  |                        |                      |          |          |      |      |            | 21.0000   | AAL95430.1  Hypothetical protein                                               |                         |    |    |   |   |   |   |
|         |                        |                      |          |          |      | 21   |            |           |                                                                                |                         |    |    |   |   |   |   |
| FN1235  | 0.365                  | 9.531                | 2.504e-1 | 4.362e-1 | 8    | 29   | 11.6848    | 37.7469   | AAL95431.1  Ankyrin repeat proteins                                            |                         |    |    |   |   |   |   |
|         |                        |                      |          |          | 34   | 24   | 36.2447    | 24.0000   |                                                                                |                         |    |    |   |   |   |   |
| FN1237  | 0.712                  | 13.428               | 6.986e-3 | 9.988e-4 | 51   | 112  | 74.4904    | 145.7811  | AAL95433.1  Choline kinase                                                     |                         |    |    |   |   |   |   |
|         |                        |                      |          |          | 84   | 123  | 89.5456    | 123.0000  |                                                                                |                         |    |    |   |   |   |   |

Show detected proteins only  
 Show all proteins  
 Filter by category:

Proteins found: 1313

Enter (or paste) list of ORFs

Find ORFs

Test Cutoff

q-Value p-Value

.005

| Signif | Direction | Applies To   |
|--------|-----------|--------------|
| yes    | +         | ratios, bars |
| no     | n/a       | bars         |
| yes    | -         | ratios, bars |
| yes    | +         | p-, q-Values |
| yes    | -         | p-, q-Values |

Dot Plots Dot Plots



Fn Summary Table FnPg vs Fn FnSg vs Fn FnPgSg vs Fn FnPgSg vs FnPg FnSg vs FnPg FnPgSg vs FnSg Fn Coverage

| Protein       | FnSg vs FnPg           |                      |          |          | Raw  |      |          |          | Normalized                                                     |      |      |      | Description | Log <sub>2</sub> Ratios |    |    |   |   |   |   |
|---------------|------------------------|----------------------|----------|----------|------|------|----------|----------|----------------------------------------------------------------|------|------|------|-------------|-------------------------|----|----|---|---|---|---|
|               | Log <sub>2</sub> Ratio | Log <sub>2</sub> Sum | q-Value  | p-Value  | FnPg | FnSg | FnPg     | FnSg     | FnPg                                                           | FnSg | FnPg | FnSg |             |                         |    |    |   |   |   |   |
|               |                        |                      |          |          |      |      |          |          |                                                                |      |      |      |             | -6                      | -4 | -2 | 0 | 2 | 4 | 6 |
| <b>FN1238</b> | -0.414                 | 4.414                |          |          | 5    | 4    | 5.3301   | 4.0000   | AAL95434.1   Hypothetical protein                              |      |      |      |             |                         |    |    |   |   |   |   |
| <b>FN1239</b> |                        |                      |          |          | 12   |      | 12.7922  |          | AAL95435.1   Hypothetical protein                              |      |      |      |             |                         |    |    |   |   |   |   |
| <b>FN1240</b> | -0.769                 | 6.344                | 1.319e-1 | 1.439e-1 | 11   | 6    | 16.0666  | 7.8097   | AAL95436.1   Lipopolysaccharide core biosynthesis protein rfaY |      |      |      |             |                         |    |    |   |   |   |   |
| <b>FN1241</b> | 0.629                  | 6.343                | 1.099e-1 | 1.014e-1 | 7    | 8    | 10.2242  | 10.4129  | AAL95437.1   polysaccharide biosynthesis protein               |      |      |      |             |                         |    |    |   |   |   |   |
| <b>FN1242</b> | 0.448                  | 8.972                |          |          | 18   | 25   | 19.1883  | 25.0000  | AAL95438.1   Polysaccharide deacetylase                        |      |      |      |             |                         |    |    |   |   |   |   |
| <b>FN1243</b> | -0.255                 | 7.544                |          |          | 14   | 12   | 14.9243  | 12.0000  | AAL95439.1   Glycosyl transferase                              |      |      |      |             |                         |    |    |   |   |   |   |
| <b>FN1244</b> | 0.185                  | 9.278                | 3.677e-1 | 7.594e-1 | 5    | 17   | 7.3030   | 22.1275  | AAL95440.1   Polysaccharide deacetylase                        |      |      |      |             |                         |    |    |   |   |   |   |
| <b>FN1245</b> | 0.609                  | 5.168                | 4.202e-3 | 4.429e-4 | 3    | 6    | 4.3818   | 7.8097   | AAL95441.1   Glycosyl transferase                              |      |      |      |             |                         |    |    |   |   |   |   |
| <b>FN1246</b> | 0.231                  | 8.229                |          |          | 15   | 18   | 15.9903  | 18.0000  | AAL95442.1   Lipooligosaccharide cholinephosphotransferase     |      |      |      |             |                         |    |    |   |   |   |   |
| <b>FN1247</b> | 0.968                  | 9.238                | 7.704e-2 | 4.994e-2 | 8    | 19   | 11.6848  | 24.7307  | AAL95443.1   LOS biosynthesis enzyme LBGB                      |      |      |      |             |                         |    |    |   |   |   |   |
| <b>FN1250</b> | 0.040                  | 8.774                | 4.033e-1 | 8.823e-1 | 10   | 18   | 14.6060  | 23.4291  | AAL95446.1   Guanine-hypoxanthine permease                     |      |      |      |             |                         |    |    |   |   |   |   |
| <b>FN1251</b> | 0.555                  | 6.354                |          |          | 7    | 5    | 7.4621   | 5.0000   | AAL95447.1   High-affinity iron permease                       |      |      |      |             |                         |    |    |   |   |   |   |
| <b>FN1252</b> | 0.786                  | 16.487               | 5.381e-2 | 2.628e-2 | 151  | 361  | 220.5499 | 469.8836 | AAL95448.1   34 kDa membrane antigen precursor                 |      |      |      |             |                         |    |    |   |   |   |   |
| <b>FN1253</b> | 0.102                  | 15.514               | 3.977e-1 | 8.62e-1  | 48   | 186  | 70.1086  | 242.1007 | AAL95449.1   unknown                                           |      |      |      |             |                         |    |    |   |   |   |   |
| <b>FN1254</b> | -0.219                 | 12.056               | 3.057e-1 | 5.75e-1  | 30   | 53   | 43.8179  | 68.9857  | AAL95450.1   Oxygen-insensitive NAD(P)H nitroreductase         |      |      |      |             |                         |    |    |   |   |   |   |
| <b>FN1256</b> |                        |                      |          |          | 4    |      | 4.2641   |          | AAL95452.1   C4-dicarboxylate transporter large subunit        |      |      |      |             |                         |    |    |   |   |   |   |

Show detected proteins only  
 Show all proteins  
 Filter by category:

Proteins found:  
1313

Enter (or paste) list of ORFs

Find ORFs

Test Cutoff

q-Value

p-Value

| Signif | Direction | Applies To   |
|--------|-----------|--------------|
| yes    | +         | ratios, bars |
| no     | n/a       | bars         |
| yes    | -         | ratios, bars |
| yes    | +         | p-, q-Values |
| yes    | -         | p-, q-Values |

Dot Plots  Dot Plots

Fn Summary Table FnPg vs Fn FnSg vs Fn FnPgSg vs Fn FnPgSg vs FnPg FnSg vs FnPg FnPgSg vs FnSg Fn Coverage

| Protein | FnSg vs FnPg           |                      |          |          | Raw  |      |          |          | Normalized                                               |      |      |      | Description | Log <sub>2</sub> Ratios |    |    |   |   |   |   |
|---------|------------------------|----------------------|----------|----------|------|------|----------|----------|----------------------------------------------------------|------|------|------|-------------|-------------------------|----|----|---|---|---|---|
|         | Log <sub>2</sub> Ratio | Log <sub>2</sub> Sum | q-Value  | p-Value  | FnPg | FnSg | FnPg     | FnSg     | FnPg                                                     | FnSg | FnPg | FnSg |             |                         |    |    |   |   |   |   |
|         |                        |                      |          |          |      |      |          |          |                                                          |      |      |      |             | -6                      | -4 | -2 | 0 | 2 | 4 | 6 |
| FN1258  | 0.230                  | 19.411               | 1.1e-1   | 1.015e-1 | 595  | 741  | 869.0543 | 964.4979 | AAL95454.1  C4-dicarboxylate-binding protein             |      |      |      |             |                         |    |    |   |   |   |   |
|         |                        |                      |          |          | 631  | 844  | 672.6582 | 844.0000 |                                                          |      |      |      |             |                         |    |    |   |   |   |   |
| FN1259  |                        |                      |          |          |      |      |          |          | AAL95455.1  hypothetical protein                         |      |      |      |             |                         |    |    |   |   |   |   |
|         |                        |                      |          |          |      | 9    |          | 9.0000   |                                                          |      |      |      |             |                         |    |    |   |   |   |   |
| FN1261  |                        |                      |          |          | 10   |      | 14.6060  |          | AAL95457.1  Two-component response regulator             |      |      |      |             |                         |    |    |   |   |   |   |
|         |                        |                      |          |          |      |      |          |          |                                                          |      |      |      |             |                         |    |    |   |   |   |   |
| FN1262  | -0.313                 | 8.516                |          |          |      | 21   |          | 27.3339  | AAL95458.1  Integral membrane protein                    |      |      |      |             |                         |    |    |   |   |   |   |
|         |                        |                      |          |          | 20   | 7    | 21.3204  | 7.0000   |                                                          |      |      |      |             |                         |    |    |   |   |   |   |
| FN1263  | 0.775                  | 8.255                | 1.612e-2 | 3.402e-3 | 11   | 19   | 16.0666  | 24.7307  | AAL95459.1  Cobalt chelataase                            |      |      |      |             |                         |    |    |   |   |   |   |
|         |                        |                      |          |          | 10   | 21   | 10.6602  | 21.0000  |                                                          |      |      |      |             |                         |    |    |   |   |   |   |
| FN1264  |                        |                      |          |          |      | 12   |          | 15.6194  | AAL95460.1  Hypothetical protein                         |      |      |      |             |                         |    |    |   |   |   |   |
|         |                        |                      |          |          |      | 17   |          | 17.0000  |                                                          |      |      |      |             |                         |    |    |   |   |   |   |
| FN1265  | -0.241                 | 13.109               | 1.249e-1 | 1.294e-1 | 64   | 76   | 93.4781  | 98.9229  | AAL95461.1  Outer membrane protein                       |      |      |      |             |                         |    |    |   |   |   |   |
|         |                        |                      |          |          | 104  | 74   | 110.8660 | 74.0000  |                                                          |      |      |      |             |                         |    |    |   |   |   |   |
| FN1266  | 0.026                  | 13.574               | 4.062e-1 | 8.932e-1 | 63   | 99   | 92.0175  | 128.8600 | AAL95462.1  UTP--glucose-1-phosphate uridylyltransferase |      |      |      |             |                         |    |    |   |   |   |   |
|         |                        |                      |          |          | 119  | 94   | 126.8563 | 94.0000  |                                                          |      |      |      |             |                         |    |    |   |   |   |   |
| FN1267  | -0.455                 | 10.572               | 1.202e-1 | 1.199e-1 | 37   | 32   | 54.0420  | 41.6517  | AAL95463.1  Hypothetical protein                         |      |      |      |             |                         |    |    |   |   |   |   |
|         |                        |                      |          |          | 35   | 25   | 37.3107  | 25.0000  |                                                          |      |      |      |             |                         |    |    |   |   |   |   |
| FN1268  | -0.563                 | 15.004               | 6.929e-4 | 1.394e-5 | 155  | 120  | 226.3923 | 156.1940 | AAL95464.1  Methionyl-tRNA synthetase                    |      |      |      |             |                         |    |    |   |   |   |   |
|         |                        |                      |          |          | 201  | 142  | 214.2699 | 142.0000 |                                                          |      |      |      |             |                         |    |    |   |   |   |   |
| FN1269  | 1.095                  | 5.280                |          |          |      | 7    |          | 9.1113   | AAL95465.1  Hypothetical lipoprotein                     |      |      |      |             |                         |    |    |   |   |   |   |
|         |                        |                      |          |          | 4    |      | 4.2641   |          |                                                          |      |      |      |             |                         |    |    |   |   |   |   |
| FN1270  | -0.934                 | 8.035                |          |          |      | 9    |          | 11.7145  | AAL95466.1  Hypothetical cytosolic protein               |      |      |      |             |                         |    |    |   |   |   |   |
|         |                        |                      |          |          | 21   |      | 22.3864  |          |                                                          |      |      |      |             |                         |    |    |   |   |   |   |
| FN1271  | 0.718                  | 10.732               | 1.407e-1 | 1.649e-1 | 9    | 49   | 13.1454  | 63.7792  | AAL95467.1  Protease IV                                  |      |      |      |             |                         |    |    |   |   |   |   |
|         |                        |                      |          |          | 48   | 42   | 51.1689  | 42.0000  |                                                          |      |      |      |             |                         |    |    |   |   |   |   |
| FN1273  | 0.357                  | 11.696               | 3.223e-1 | 6.208e-1 | 4    | 51   | 5.8424   | 66.3824  | AAL95469.1  Outer membrane protein tolC                  |      |      |      |             |                         |    |    |   |   |   |   |
|         |                        |                      |          |          | 90   | 64   | 95.9417  | 64.0000  |                                                          |      |      |      |             |                         |    |    |   |   |   |   |
| FN1274  | 0.927                  | 8.045                | 1.006e-1 | 8.603e-2 | 3    | 16   | 4.3818   | 20.8259  | AAL95470.1  Acriflavin resistance protein E              |      |      |      |             |                         |    |    |   |   |   |   |
|         |                        |                      |          |          | 18   | 24   | 19.1883  | 24.0000  |                                                          |      |      |      |             |                         |    |    |   |   |   |   |
| FN1275  | 0.393                  | 8.448                | 1.715e-1 | 2.418e-1 | 7    | 16   | 10.2242  | 20.8259  | AAL95471.1  Acriflavin resistance protein B              |      |      |      |             |                         |    |    |   |   |   |   |
|         |                        |                      |          |          | 21   | 22   | 22.3864  | 22.0000  |                                                          |      |      |      |             |                         |    |    |   |   |   |   |

Show detected proteins only  
 Show all proteins  
 Filter by category:

Proteins found: 1313

Enter (or paste) list of ORFs

Find ORFs

Test Cutoff

q-Value

p-Value

.005

| Signif | Direction | Applies To   |
|--------|-----------|--------------|
| yes    | +         | ratios, bars |
| no     | n/a       | bars         |
| yes    | -         | ratios, bars |
| yes    | +         | p-, q-Values |
| yes    | -         | p-, q-Values |

Dot Plots Dot Plots

Fn Summary Table FnPg vs Fn FnSg vs Fn FnPgSg vs Fn FnPgSg vs FnPg FnSg vs FnPg FnPgSg vs FnSg Fn Coverage

| Protein | FnSg vs FnPg           |                      |          |          | Raw  |      |          |          | Normalized                                                           |      |      |      | Description | Log <sub>2</sub> Ratios |    |    |   |   |   |   |
|---------|------------------------|----------------------|----------|----------|------|------|----------|----------|----------------------------------------------------------------------|------|------|------|-------------|-------------------------|----|----|---|---|---|---|
|         | Log <sub>2</sub> Ratio | Log <sub>2</sub> Sum | q-Value  | p-Value  | FnPg | FnSg | FnPg     | FnSg     | FnPg                                                                 | FnSg | FnPg | FnSg |             |                         |    |    |   |   |   |   |
|         |                        |                      |          |          |      |      |          |          |                                                                      |      |      |      |             | -6                      | -4 | -2 | 0 | 2 | 4 | 6 |
| FN1276  | 0.028                  | 8.537                | 3.846e-1 | 8.16e-1  | 13   | 13   | 18.9877  | 16.9210  | AAL95472.1  Hypothetical protein                                     |      |      |      |             |                         |    |    |   |   |   |   |
|         |                        |                      |          |          | 18   | 22   | 19.1883  | 22.0000  |                                                                      |      |      |      |             |                         |    |    |   |   |   |   |
| FN1277  | -0.103                 | 15.739               | 3.686e-1 | 7.621e-1 | 107  | 160  | 156.2837 | 208.2587 | AAL95473.1  Aminoacyl-histidine dipeptidase                          |      |      |      |             |                         |    |    |   |   |   |   |
|         |                        |                      |          |          | 308  | 243  | 328.3339 | 243.0000 |                                                                      |      |      |      |             |                         |    |    |   |   |   |   |
| FN1278  | 1.782                  | 5.137                |          |          |      |      |          |          | AAL95474.1  Acetyltransferase                                        |      |      |      |             |                         |    |    |   |   |   |   |
|         |                        |                      |          |          | 3    | 11   | 3.1981   | 11.0000  |                                                                      |      |      |      |             |                         |    |    |   |   |   |   |
| FN1279  | -0.348                 | 11.520               | 6.965e-2 | 4.101e-2 | 37   | 40   | 54.0420  | 52.0647  | AAL95475.1  Zinc metallohydrolase, glyoxalase II family              |      |      |      |             |                         |    |    |   |   |   |   |
|         |                        |                      |          |          | 64   | 44   | 68.2252  | 44.0000  |                                                                      |      |      |      |             |                         |    |    |   |   |   |   |
| FN1280  | 0.758                  | 12.654               | 2.161e-2 | 5.248e-3 | 40   | 89   | 58.4238  | 115.8439 | AAL95476.1  Serine protease, V8 family                               |      |      |      |             |                         |    |    |   |   |   |   |
|         |                        |                      |          |          | 61   | 93   | 65.0272  | 93.0000  |                                                                      |      |      |      |             |                         |    |    |   |   |   |   |
| FN1281  | 0.934                  | 9.331                | 1.248e-3 | 4.666e-5 | 12   | 27   | 17.5271  | 35.1436  | AAL95477.1  Cysteine protease                                        |      |      |      |             |                         |    |    |   |   |   |   |
|         |                        |                      |          |          | 18   | 35   | 19.1883  | 35.0000  |                                                                      |      |      |      |             |                         |    |    |   |   |   |   |
| FN1282  | -0.221                 | 12.809               | 2.555e-1 | 4.482e-1 | 80   | 66   | 116.8476 | 85.9067  | AAL95478.1  LSU ribosomal protein L17P                               |      |      |      |             |                         |    |    |   |   |   |   |
|         |                        |                      |          |          | 62   | 71   | 66.0932  | 71.0000  |                                                                      |      |      |      |             |                         |    |    |   |   |   |   |
| FN1283  | 0.506                  | 18.113               | 7.992e-2 | 5.392e-2 | 287  | 404  | 419.1909 | 525.8531 | AAL95479.1  DNA-directed RNA polymerase alpha chain                  |      |      |      |             |                         |    |    |   |   |   |   |
|         |                        |                      |          |          | 445  | 743  | 474.3786 | 743.0000 |                                                                      |      |      |      |             |                         |    |    |   |   |   |   |
| FN1284  | -0.404                 | 17.713               | 2.38e-1  | 4.058e-1 | 525  | 324  | 766.8126 | 421.7238 | AAL95480.1  SSU ribosomal protein S4P                                |      |      |      |             |                         |    |    |   |   |   |   |
|         |                        |                      |          |          | 281  | 384  | 299.5514 | 384.0000 |                                                                      |      |      |      |             |                         |    |    |   |   |   |   |
| FN1285  | -3.654                 | 12.646               | 1.466e-1 | 1.806e-1 | 373  | 17   | 544.8021 | 22.1275  | AAL95481.1  SSU ribosomal protein S11P                               |      |      |      |             |                         |    |    |   |   |   |   |
|         |                        |                      |          |          | 22   | 23   | 23.4524  | 23.0000  |                                                                      |      |      |      |             |                         |    |    |   |   |   |   |
| FN1286  | 0.784                  | 12.429               | 2.419e-2 | 6.321e-3 | 41   | 66   | 59.8844  | 85.9067  | AAL95482.1  SSU ribosomal protein S13P                               |      |      |      |             |                         |    |    |   |   |   |   |
|         |                        |                      |          |          | 50   | 109  | 53.3010  | 109.0000 |                                                                      |      |      |      |             |                         |    |    |   |   |   |   |
| FN1287  | -1.206                 | 7.823                | 1.397e-1 | 1.624e-1 | 24   | 6    | 35.0543  | 7.8097   | AAL95483.1  Bacterial Protein Translation Initiation Factor 1 (IF-1) |      |      |      |             |                         |    |    |   |   |   |   |
|         |                        |                      |          |          | 10   | 12   | 10.6602  | 12.0000  |                                                                      |      |      |      |             |                         |    |    |   |   |   |   |
| FN1290  | -1.581                 | 9.681                | 1.784e-1 | 2.584e-1 | 62   | 17   | 90.5569  | 22.1275  | AAL95486.1  Hypothetical protein                                     |      |      |      |             |                         |    |    |   |   |   |   |
|         |                        |                      |          |          | 8    | 11   | 8.5282   | 11.0000  |                                                                      |      |      |      |             |                         |    |    |   |   |   |   |
| FN1293  |                        |                      |          |          |      | 4    |          | 5.2065   | AAL95489.1  Hypothetical protein                                     |      |      |      |             |                         |    |    |   |   |   |   |
|         |                        |                      |          |          |      |      |          |          |                                                                      |      |      |      |             |                         |    |    |   |   |   |   |
| FN1297  | 0.580                  | 9.368                | 2.583e-2 | 7.093e-3 | 12   | 26   | 17.5271  | 33.8420  | AAL95493.1  Methionine aminopeptidase                                |      |      |      |             |                         |    |    |   |   |   |   |
|         |                        |                      |          |          | 23   | 29   | 24.5184  | 29.0000  |                                                                      |      |      |      |             |                         |    |    |   |   |   |   |
| FN1298  | -0.692                 | 11.831               | 1.109e-1 | 1.031e-1 | 62   | 53   | 90.5569  | 68.9857  | AAL95494.1  Adenylate kinase                                         |      |      |      |             |                         |    |    |   |   |   |   |
|         |                        |                      |          |          | 59   | 26   | 62.8951  | 26.0000  |                                                                      |      |      |      |             |                         |    |    |   |   |   |   |

Show detected proteins only  
 Show all proteins  
 Filter by category:

Proteins found: 1313

Enter (or paste) list of ORFs

Find ORFs

Test Cutoff

q-Value

p-Value

.005

| Signif | Direction | Applies To   |
|--------|-----------|--------------|
| yes    | +         | ratios, bars |
| no     | n/a       | bars         |
| yes    | -         | ratios, bars |
| yes    | +         | p-, q-Values |
| yes    | -         | p-, q-Values |

Dot Plots Dot Plots

Fn Summary Table FnPg vs Fn FnSg vs Fn FnPgSg vs Fn FnPgSg vs FnPg FnSg vs FnPg FnPgSg vs FnSg Fn Coverage

| Protein | FnSg vs FnPg           |                      |          |          | Raw  |      |          |           | Normalized                                                  |      |      |      | Description | Log <sub>2</sub> Ratios |    |    |   |   |   |   |
|---------|------------------------|----------------------|----------|----------|------|------|----------|-----------|-------------------------------------------------------------|------|------|------|-------------|-------------------------|----|----|---|---|---|---|
|         | Log <sub>2</sub> Ratio | Log <sub>2</sub> Sum | q-Value  | p-Value  | FnPg | FnSg | FnPg     | FnSg      | FnPg                                                        | FnSg | FnPg | FnSg |             | -6                      | -4 | -2 | 0 | 2 | 4 | 6 |
| FN1299  | -0.068                 | 5.287                |          |          |      | 4    |          | 5.2065    | AAL95495.1  dTDP-glucose 4,6-dehydratase                    |      |      |      |             |                         |    |    |   |   |   |   |
|         |                        |                      |          |          | 6    | 7    | 6.3961   | 7.0000    |                                                             |      |      |      |             |                         |    |    |   |   |   |   |
| FN1301  | -0.475                 | 11.753               | 2.3e-1   | 3.849e-1 | 70   | 42   | 102.2417 | 54.6679   | AAL95497.1  ABC transporter ATP-binding protein             |      |      |      |             |                         |    |    |   |   |   |   |
|         |                        |                      |          |          | 34   | 45   | 36.2447  | 45.0000   |                                                             |      |      |      |             |                         |    |    |   |   |   |   |
| FN1302  | -2.002                 | 15.517               | 1.294e-1 | 1.387e-1 | 489  | 81   | 714.2312 | 105.4309  | AAL95498.1  Hypothetical protein                            |      |      |      |             |                         |    |    |   |   |   |   |
|         |                        |                      |          |          | 143  | 111  | 152.4408 | 111.0000  |                                                             |      |      |      |             |                         |    |    |   |   |   |   |
| FN1303  | -0.165                 | 12.244               | 1.421e-1 | 1.683e-1 | 55   | 55   | 80.3328  | 71.5889   | AAL95499.1  hypothetical cytosolic protein                  |      |      |      |             |                         |    |    |   |   |   |   |
|         |                        |                      |          |          | 63   | 60   | 67.1592  | 60.0000   |                                                             |      |      |      |             |                         |    |    |   |   |   |   |
| FN1304  | -0.228                 | 14.009               | 1.296e-1 | 1.391e-1 | 83   | 87   | 121.2294 | 113.2406  | AAL95500.1  Single-strand DNA binding protein               |      |      |      |             |                         |    |    |   |   |   |   |
|         |                        |                      |          |          | 147  | 124  | 156.7048 | 124.0000  |                                                             |      |      |      |             |                         |    |    |   |   |   |   |
| FN1305  | -0.424                 | 11.170               | 1.855e-1 | 2.762e-1 | 36   | 46   | 52.5814  | 59.8744   | AAL95501.1  Hypothetical cytosolic protein                  |      |      |      |             |                         |    |    |   |   |   |   |
|         |                        |                      |          |          | 55   | 23   | 58.6311  | 23.0000   |                                                             |      |      |      |             |                         |    |    |   |   |   |   |
| FN1306  | 0.100                  | 15.236               |          |          |      | 135  |          | 175.7182  | AAL95502.1  Methyltransferase                               |      |      |      |             |                         |    |    |   |   |   |   |
|         |                        |                      |          |          | 178  | 231  | 189.7514 | 231.0000  |                                                             |      |      |      |             |                         |    |    |   |   |   |   |
| FN1309  | -0.074                 | 14.294               | 3.691e-1 | 7.639e-1 | 121  | 87   | 176.7321 | 113.2406  | AAL95505.1  Hypothetical protein                            |      |      |      |             |                         |    |    |   |   |   |   |
|         |                        |                      |          |          | 107  | 163  | 114.0641 | 163.0000  |                                                             |      |      |      |             |                         |    |    |   |   |   |   |
| FN1313  | 0.047                  | 12.160               | 3.583e-1 | 7.289e-1 | 51   | 58   | 74.4904  | 75.4938   | AAL95509.1  Oligopeptide-binding protein oppA               |      |      |      |             |                         |    |    |   |   |   |   |
|         |                        |                      |          |          | 55   | 62   | 58.6311  | 62.0000   |                                                             |      |      |      |             |                         |    |    |   |   |   |   |
| FN1315  |                        |                      |          |          |      | 6    |          | 7.8097    | AAL95511.1  Hypothetical protein                            |      |      |      |             |                         |    |    |   |   |   |   |
|         |                        |                      |          |          |      |      |          |           |                                                             |      |      |      |             |                         |    |    |   |   |   |   |
| FN1317  | -0.341                 | 7.182                | 1.95e-1  | 3.013e-1 | 12   | 8    | 17.5271  | 10.4129   | AAL95513.1  RNA polymerase sigma factor                     |      |      |      |             |                         |    |    |   |   |   |   |
|         |                        |                      |          |          | 9    | 11   | 9.5942   | 11.0000   |                                                             |      |      |      |             |                         |    |    |   |   |   |   |
| FN1318  | -0.420                 | 9.445                | 1.354e-1 | 1.52e-1  | 17   | 22   | 24.8301  | 28.6356   | AAL95514.1  RNA polymerase sigma factor rpoD                |      |      |      |             |                         |    |    |   |   |   |   |
|         |                        |                      |          |          | 34   | 17   | 36.2447  | 17.0000   |                                                             |      |      |      |             |                         |    |    |   |   |   |   |
| FN1319  | 1.201                  | 7.970                | 1.214e-1 | 1.221e-1 | 7    | 10   | 10.2242  | 13.0162   | AAL95515.1  DNA primase                                     |      |      |      |             |                         |    |    |   |   |   |   |
|         |                        |                      |          |          | 10   | 35   | 10.6602  | 35.0000   |                                                             |      |      |      |             |                         |    |    |   |   |   |   |
| FN1320  | 0.117                  | 14.990               | 2.657e-1 | 4.725e-1 | 116  | 168  | 169.4291 | 218.6716  | AAL95516.1  Peptidyl-prolyl cis-trans isomerase             |      |      |      |             |                         |    |    |   |   |   |   |
|         |                        |                      |          |          | 166  | 157  | 176.9592 | 157.0000  |                                                             |      |      |      |             |                         |    |    |   |   |   |   |
| FN1321  | 0.311                  | 20.057               | 2.495e-2 | 6.668e-3 | 641  | 849  | 936.2417 | 1105.0725 | AAL95517.1  Acetoacetate metabolism regulatory protein atoC |      |      |      |             |                         |    |    |   |   |   |   |
|         |                        |                      |          |          | 881  | 1221 | 939.1630 | 1221.0000 |                                                             |      |      |      |             |                         |    |    |   |   |   |   |
| FN1322  | -0.832                 | 9.528                |          |          |      | 19   |          | 24.7307   | AAL95518.1  Membrane metalloprotease                        |      |      |      |             |                         |    |    |   |   |   |   |
|         |                        |                      |          |          | 34   | 16   | 36.2447  | 16.0000   |                                                             |      |      |      |             |                         |    |    |   |   |   |   |

Show detected proteins only  
 Show all proteins  
 Filter by category:

Proteins found: 1313

Test Cutoff

| Signif | Direction | Applies To   |
|--------|-----------|--------------|
| yes    | +         | ratios, bars |
| no     | n/a       | bars         |
| yes    | -         | ratios, bars |
| yes    | +         | p-, q-Values |
| yes    | -         | p-, q-Values |

Fn Summary Table FnPg vs Fn FnSg vs Fn FnPgSg vs Fn FnPgSg vs FnPg FnSg vs FnPg FnPgSg vs FnSg Fn Coverage

| Protein | FnSg vs FnPg           |                      |          |          | Raw  |      | Normalized |          | Description                                                        | Log <sub>2</sub> Ratios |    |   |   |   |   |  |
|---------|------------------------|----------------------|----------|----------|------|------|------------|----------|--------------------------------------------------------------------|-------------------------|----|---|---|---|---|--|
|         | Log <sub>2</sub> Ratio | Log <sub>2</sub> Sum | q-Value  | p-Value  | FnPg | FnSg | FnPg       | FnSg     |                                                                    |                         |    |   |   |   |   |  |
|         |                        |                      |          |          |      |      |            | -6       |                                                                    | -4                      | -2 | 0 | 2 | 4 | 6 |  |
| FN1323  | -0.420                 | 6.197                | 2.669e-3 | 2.034e-4 | 7    | 6    | 10.2242    | 7.8097   | AAL95519.1  Thymidylate kinase                                     |                         |    |   |   |   |   |  |
|         |                        |                      |          |          | 9    | 7    | 9.5942     | 7.0000   |                                                                    |                         |    |   |   |   |   |  |
| FN1324  | 0.333                  | 10.799               | 2.213e-1 | 3.63e-1  | 15   | 39   | 21.9089    | 50.7630  | AAL95520.1  1-deoxy-D-xylulose 5-phosphate reductoisomerase        |                         |    |   |   |   |   |  |
|         |                        |                      |          |          | 50   | 44   | 53.3010    | 44.0000  |                                                                    |                         |    |   |   |   |   |  |
| FN1326  | -0.285                 | 5.900                |          |          |      |      |            |          | AAL95522.1  Undecaprenyl pyrophosphate synthetase                  |                         |    |   |   |   |   |  |
|         |                        |                      |          |          | 8    | 7    | 8.5282     | 7.0000   |                                                                    |                         |    |   |   |   |   |  |
| FN1327  |                        |                      |          |          |      |      |            |          | AAL95523.1  Dimethylallyltransferase                               |                         |    |   |   |   |   |  |
|         |                        |                      |          |          |      | 11   |            | 14.3178  |                                                                    |                         |    |   |   |   |   |  |
| FN1330  |                        |                      |          |          |      |      |            |          | AAL95526.1  S-adenosylmethionine:tRNA ribosyltransferase-isomerase |                         |    |   |   |   |   |  |
|         | 0.323                  | 3.677                |          |          |      |      |            |          |                                                                    |                         |    |   |   |   |   |  |
| FN1332  | -0.219                 | 10.234               | 1.362e-1 | 1.538e-1 | 25   | 21   | 36.5149    | 27.3339  | AAL95528.1  Bacterial Peptide Chain Release Factor 1 (RF-1)        |                         |    |   |   |   |   |  |
|         |                        |                      |          |          | 36   | 37   | 38.3767    | 37.0000  |                                                                    |                         |    |   |   |   |   |  |
| FN1333  |                        |                      |          |          |      |      |            |          | AAL95529.1  Hypothetical protein                                   |                         |    |   |   |   |   |  |
|         |                        |                      |          |          |      | 7    |            | 9.1113   |                                                                    |                         |    |   |   |   |   |  |
| FN1334  | -2.289                 | 7.508                | 1.342e-1 | 1.492e-1 | 35   | 4    | 51.1208    | 5.2065   | AAL95530.1  N-acetylmuramoyl-L-alanine amidase                     |                         |    |   |   |   |   |  |
|         |                        |                      |          |          | 8    | 7    | 8.5282     | 7.0000   |                                                                    |                         |    |   |   |   |   |  |
| FN1335  | -0.725                 | 11.755               | 1.196e-1 | 1.187e-1 | 40   | 18   | 58.4238    | 23.4291  | AAL95531.1  Protein translocase subunit YajC                       |                         |    |   |   |   |   |  |
|         |                        |                      |          |          | 87   | 68   | 92.7437    | 68.0000  |                                                                    |                         |    |   |   |   |   |  |
| FN1336  | -0.739                 | 8.354                |          |          | 16   |      | 23.3695    |          | AAL95532.1  Hypothetical protein                                   |                         |    |   |   |   |   |  |
|         |                        |                      |          |          |      | 14   |            | 14.0000  |                                                                    |                         |    |   |   |   |   |  |
| FN1337  | -0.188                 | 5.803                |          |          | 8    |      | 11.6848    |          | AAL95533.1  unknown                                                |                         |    |   |   |   |   |  |
|         |                        |                      |          |          | 4    | 7    | 4.2641     | 7.0000   |                                                                    |                         |    |   |   |   |   |  |
| FN1340  | -0.186                 | 16.136               | 3.042e-1 | 5.707e-1 | 259  | 173  | 378.2942   | 225.1797 | AAL95536.1  Glutamyl-tRNA synthetase                               |                         |    |   |   |   |   |  |
|         |                        |                      |          |          | 182  | 278  | 194.0155   | 278.0000 |                                                                    |                         |    |   |   |   |   |  |
| FN1341  | -0.191                 | 7.163                |          |          |      |      |            |          | AAL95537.1  Bacterial Peptide Chain Release Factor 2 (RF-2)        |                         |    |   |   |   |   |  |
|         |                        |                      |          |          |      | 8    |            | 10.4129  |                                                                    |                         |    |   |   |   |   |  |
| FN1343  |                        |                      |          |          |      |      |            |          | AAL95539.1  seC-independent protein TATD                           |                         |    |   |   |   |   |  |
|         | -0.776                 | 10.392               |          |          | 45   | 30   | 47.9709    | 30.0000  |                                                                    |                         |    |   |   |   |   |  |
| FN1345  |                        |                      |          |          |      |      |            |          | AAL95541.1  2-hydroxy-6-oxo-6-phenylhexa-2,4-dienoate hydrolase    |                         |    |   |   |   |   |  |
|         |                        |                      |          |          |      | 4    |            | 4.0000   |                                                                    |                         |    |   |   |   |   |  |
| FN1346  | 1.590                  | 6.945                |          |          |      |      |            |          | AAL95542.1  Hypothetical cytosolic protein                         |                         |    |   |   |   |   |  |
|         |                        |                      |          |          | 6    | 19   | 6.3961     | 19.0000  |                                                                    |                         |    |   |   |   |   |  |

Show detected proteins only  
 Show all proteins  
 Filter by category:

Proteins found: 1313

Test Cutoff

| Signif      | Direction | Applies To |
|-------------|-----------|------------|
| red         | yes       | +          |
| yellow      | no        | n/a        |
| green       | yes       | -          |
| pink        | yes       | +          |
| light green | yes       | -          |

Applies To: ratios, bars; ratios, bars; ratios, bars; p-, q-Values

Fn Summary Table FnPg vs Fn FnSg vs Fn FnPgSg vs Fn FnPgSg vs FnPg FnSg vs FnPg FnPgSg vs FnSg Fn Coverage

| Protein | FnSg vs FnPg           |                      |          |          | Raw  |      | Normalized |          | Description                                              | Log <sub>2</sub> Ratios |    |    |   |   |   |   |
|---------|------------------------|----------------------|----------|----------|------|------|------------|----------|----------------------------------------------------------|-------------------------|----|----|---|---|---|---|
|         | Log <sub>2</sub> Ratio | Log <sub>2</sub> Sum | q-Value  | p-Value  | FnPg | FnSg | FnPg       | FnSg     |                                                          | -6                      | -4 | -2 | 0 | 2 | 4 | 6 |
| FN1347  | -0.229                 | 5.740                | 6.766e-2 | 3.884e-2 | 5    | 5    | 7.3030     | 6.5081   | AAL95543.1  Hypothetical cytosolic protein               |                         |    |    |   |   |   |   |
|         |                        |                      |          |          | 8    | 7    | 8.5282     | 7.0000   |                                                          |                         |    |    |   |   |   |   |
| FN1348  | 1.438                  | 8.604                | 2.334e-2 | 5.951e-3 | 4    | 23   | 5.8424     | 29.9372  | AAL95544.1  ABC transporter ATP-binding protein          |                         |    |    |   |   |   |   |
|         |                        |                      |          |          | 17   | 35   | 18.1223    | 35.0000  |                                                          |                         |    |    |   |   |   |   |
| FN1349  | 0.357                  | 6.156                |          |          |      | 7    |            | 9.1113   | AAL95545.1  ABC transporter permease protein             |                         |    |    |   |   |   |   |
|         |                        |                      |          |          | 7    | 10   | 7.4621     | 10.0000  |                                                          |                         |    |    |   |   |   |   |
| FN1351  | -0.016                 | 10.820               | 4.085e-1 | 9.017e-1 | 33   | 35   | 48.1997    | 45.5566  | AAL95547.1  15 kDa lipoprotein precursor                 |                         |    |    |   |   |   |   |
|         |                        |                      |          |          | 35   | 39   | 37.3107    | 39.0000  |                                                          |                         |    |    |   |   |   |   |
| FN1352  | 0.047                  | 11.397               | 3.625e-1 | 7.424e-1 | 32   | 35   | 46.7391    | 45.5566  | AAL95548.1  ABC transporter ATP-binding protein          |                         |    |    |   |   |   |   |
|         |                        |                      |          |          | 52   | 60   | 55.4330    | 60.0000  |                                                          |                         |    |    |   |   |   |   |
| FN1353  | -0.056                 | 7.743                |          |          |      | 9    |            | 11.7145  | AAL95549.1  ABC transporter permease protein             |                         |    |    |   |   |   |   |
|         |                        |                      |          |          | 14   | 17   | 14.9243    | 17.0000  |                                                          |                         |    |    |   |   |   |   |
| FN1354  | -0.583                 | 9.510                |          |          |      | 17   |            | 22.1275  | AAL95550.1  ABC transporter permease protein             |                         |    |    |   |   |   |   |
|         |                        |                      |          |          | 31   | 22   | 33.0466    | 22.0000  |                                                          |                         |    |    |   |   |   |   |
| FN1358  | -0.455                 | 10.899               |          |          |      | 22   |            | 28.6356  | AAL95554.1  Hypothetical protein                         |                         |    |    |   |   |   |   |
|         |                        |                      |          |          | 48   | 46   | 51.1689    | 46.0000  |                                                          |                         |    |    |   |   |   |   |
| FN1359  | 0.621                  | 18.794               | 1.536e-1 | 1.993e-1 | 167  | 760  | 243.9194   | 989.2286 | AAL95555.1  Dipeptide-binding protein                    |                         |    |    |   |   |   |   |
|         |                        |                      |          |          | 791  | 683  | 843.2212   | 683.0000 |                                                          |                         |    |    |   |   |   |   |
| FN1362  | 0.703                  | 12.295               | 7.088e-2 | 4.238e-2 | 25   | 76   | 36.5149    | 98.9229  | AAL95558.1  Dipeptide transport ATP-binding protein dppD |                         |    |    |   |   |   |   |
|         |                        |                      |          |          | 70   | 82   | 74.6213    | 82.0000  |                                                          |                         |    |    |   |   |   |   |
| FN1363  | 0.947                  | 11.699               | 5.358e-2 | 2.605e-2 | 16   | 70   | 23.3695    | 91.1132  | AAL95559.1  Dipeptide transport ATP-binding protein dppF |                         |    |    |   |   |   |   |
|         |                        |                      |          |          | 56   | 69   | 59.6971    | 69.0000  |                                                          |                         |    |    |   |   |   |   |
| FN1364  |                        |                      |          |          | 30   |      | 43.8179    |          | AAL95560.1  LSU ribosomal protein L32P                   |                         |    |    |   |   |   |   |
|         |                        |                      |          |          |      |      |            |          |                                                          |                         |    |    |   |   |   |   |
| FN1365  | 0.750                  | 14.686               | 1.07e-1  | 9.628e-2 | 43   | 136  | 62.8056    | 177.0199 | AAL95561.1  GTP-binding protein                          |                         |    |    |   |   |   |   |
|         |                        |                      |          |          | 176  | 244  | 187.6194   | 244.0000 |                                                          |                         |    |    |   |   |   |   |
| FN1366  | -0.376                 | 14.422               | 1.007e-1 | 8.614e-2 | 99   | 83   | 144.5990   | 108.0342 | AAL95562.1  Triosephosphate isomerase                    |                         |    |    |   |   |   |   |
|         |                        |                      |          |          | 181  | 152  | 192.9495   | 152.0000 |                                                          |                         |    |    |   |   |   |   |
| FN1368  |                        |                      |          |          |      | 4    |            | 4.0000   | AAL95564.1  COMF operon protein 3                        |                         |    |    |   |   |   |   |
|         |                        |                      |          |          |      |      |            |          |                                                          |                         |    |    |   |   |   |   |
| FN1371  | 0.230                  | 4.414                |          |          |      |      |            |          | AAL95567.1  Ribonuclease HII                             |                         |    |    |   |   |   |   |
|         |                        |                      |          |          | 4    | 5    | 4.2641     | 5.0000   |                                                          |                         |    |    |   |   |   |   |

Show detected proteins only  
 Show all proteins  
 Filter by category:

Proteins found: 1313

Test Cutoff

| Signif | Direction | Applies To   |
|--------|-----------|--------------|
| yes    | +         | ratios, bars |
| no     | n/a       | bars         |
| yes    | -         | ratios, bars |
| yes    | +         | p-, q-Values |
| yes    | -         | p-, q-Values |

Fn Summary Table FnPg vs Fn FnSg vs Fn FnPgSg vs Fn FnPgSg vs FnPg FnSg vs FnPg FnPgSg vs FnSg Fn Coverage

| Protein       | FnSg vs FnPg           |                      |          |          | Raw  |      | Normalized |          | Description                                                | Log <sub>2</sub> Ratios               |    |    |   |   |   |   |
|---------------|------------------------|----------------------|----------|----------|------|------|------------|----------|------------------------------------------------------------|---------------------------------------|----|----|---|---|---|---|
|               | Log <sub>2</sub> Ratio | Log <sub>2</sub> Sum | q-Value  | p-Value  | FnPg | FnSg | FnPg       | FnSg     |                                                            | -6                                    | -4 | -2 | 0 | 2 | 4 | 6 |
| <b>FN1373</b> |                        |                      |          |          |      | 5    |            | 5.0000   | AAL95569.1  regulatory protein                             |                                       |    |    |   |   |   |   |
| <b>FN1374</b> | 0.100                  | 5.900                |          |          |      | 7    | 8          | 7.4621   | 8.0000                                                     | AAL95570.1  Transcriptional regulator |    |    |   |   |   |   |
| <b>FN1375</b> | -1.210                 | 12.234               |          |          |      | 99   | 34         | 105.5359 | 34.0000                                                    | AAL95571.1  Citrate-sodium symport    |    |    |   |   |   |   |
| <b>FN1376</b> | 0.724                  | 19.389               | 8.708e-2 | 6.465e-2 | 282  | 647  | 411.8879   | 842.1459 | AAL95572.1  Oxaloacetate decarboxylase alpha chain         |                                       |    |    |   |   |   |   |
| <b>FN1377</b> |                        |                      |          |          |      |      | 9          |          | 11.7145                                                    | AAL95573.1  CITG protein              |    |    |   |   |   |   |
| <b>FN1378</b> | 0.229                  | 9.451                |          |          | 5    | 22   | 7.3030     | 28.6356  | AAL95574.1  Citrate lyase acyl carrier protein             |                                       |    |    |   |   |   |   |
| <b>FN1379</b> | 0.559                  | 16.866               | 2.039e-1 | 3.218e-1 | 60   | 328  | 87.6357    | 426.9302 | AAL95575.1  Citrate lyase beta chain                       |                                       |    |    |   |   |   |   |
| <b>FN1380</b> | 0.404                  | 18.871               | 3.009e-1 | 5.619e-1 | 81   | 431  | 118.3082   | 560.9967 | AAL95576.1  Citrate lyase beta chain                       |                                       |    |    |   |   |   |   |
| <b>FN1382</b> | -0.985                 | 6.600                |          |          |      | 13   | 7          | 13.8583  | 7.0000                                                     | AAL95578.1  ATPase                    |    |    |   |   |   |   |
| <b>FN1383</b> | 0.715                  | 7.130                | 9.362e-2 | 7.579e-2 | 9    | 11   | 13.1454    | 14.3178  | AAL95579.1  DNA polymerase III alpha subunit               |                                       |    |    |   |   |   |   |
| <b>FN1385</b> | 1.796                  | 5.150                |          |          |      |      | 4          |          | 5.2065                                                     | AAL95581.1  Hypothetical protein      |    |    |   |   |   |   |
| <b>FN1386</b> | 1.199                  | 8.302                |          |          |      |      | 16         |          | 20.8259                                                    | AAL95582.1  SWF/SNF family helicase   |    |    |   |   |   |   |
| <b>FN1391</b> | -0.662                 | 11.201               | 7.426e-2 | 4.638e-2 | 50   | 37   | 73.0298    | 48.1598  | AAL95584.1  Acetyltransferase                              |                                       |    |    |   |   |   |   |
| <b>FN1392</b> | -1.173                 | 13.206               | 1.734e-1 | 2.466e-1 | 167  | 48   | 243.9194   | 62.4776  | AAL95585.1  SSU ribosomal protein S16P                     |                                       |    |    |   |   |   |   |
| <b>FN1393</b> | 1.375                  | 9.546                | 3.124e-2 | 9.79e-3  | 5    | 30   | 7.3030     | 39.0485  | AAL95586.1  Signal recognition particle, subunit FFH/SRP54 |                                       |    |    |   |   |   |   |
| <b>FN1397</b> | -0.513                 | 11.976               | 1.751e-1 | 2.505e-1 | 33   | 44   | 48.1997    | 57.2711  | AAL95590.1  Glutaminase                                    |                                       |    |    |   |   |   |   |

Show detected proteins only  
 Show all proteins  
 Filter by category:

Proteins found:  
1313

Enter (or paste) list of ORFs

Test Cutoff

| Signif | Direction | Applies To   |
|--------|-----------|--------------|
| yes    | +         | ratios, bars |
| no     | n/a       | bars         |
| yes    | -         | ratios, bars |
| yes    | +         | p-, q-Values |
| yes    | -         |              |

Fn Summary Table FnPg vs Fn FnSg vs Fn FnPgSg vs Fn FnPgSg vs FnPg FnSg vs FnPg FnPgSg vs FnSg Fn Coverage

| Protein | FnSg vs FnPg           |                      |          |          | Raw  |      | Normalized |           | Description                                                | Log <sub>2</sub> Ratios |    |    |   |   |   |   |
|---------|------------------------|----------------------|----------|----------|------|------|------------|-----------|------------------------------------------------------------|-------------------------|----|----|---|---|---|---|
|         | Log <sub>2</sub> Ratio | Log <sub>2</sub> Sum | q-Value  | p-Value  | FnPg | FnSg | FnPg       | FnSg      |                                                            |                         |    |    |   |   |   |   |
|         |                        |                      |          |          |      |      |            |           |                                                            | -6                      | -4 | -2 | 0 | 2 | 4 | 6 |
| FN1398  | -0.419                 | 11.378               | 2.868e-1 | 5.25e-1  | 16   | 34   | 23.3695    | 44.2550   | AAL95591.1  Amino acid carrier protein alsT                |                         |    |    |   |   |   |   |
|         |                        |                      |          |          | 90   | 45   | 95.9417    | 45.0000   |                                                            |                         |    |    |   |   |   |   |
| FN1399  |                        |                      |          |          |      |      |            |           | AAL95592.1  Hypothetical cytosolic protein                 |                         |    |    |   |   |   |   |
|         |                        |                      |          |          |      |      |            |           |                                                            |                         |    |    |   |   |   |   |
| FN1400  |                        |                      |          |          |      |      |            |           | AAL95593.1  serine/threonine kinase                        |                         |    |    |   |   |   |   |
|         |                        |                      |          |          |      |      |            |           |                                                            |                         |    |    |   |   |   |   |
| FN1406  | 0.065                  | 12.427               | 4.069e-1 | 8.956e-1 | 22   | 59   | 32.1331    | 76.7954   | AAL95599.1  Histidine ammonia-lyase                        |                         |    |    |   |   |   |   |
|         |                        |                      |          |          | 106  | 75   | 112.9980   | 75.0000   |                                                            |                         |    |    |   |   |   |   |
| FN1407  | -0.042                 | 10.142               |          |          |      |      |            |           | AAL95600.1  Glutamate formiminotransferase                 |                         |    |    |   |   |   |   |
|         |                        |                      |          |          | 32   | 22   | 34.1126    | 22.0000   |                                                            |                         |    |    |   |   |   |   |
| FN1411  | 0.940                  | 18.282               | 3.584e-2 | 1.251e-2 | 196  | 594  | 286.2767   | 773.1602  | AAL95604.1  Threonine dehydratase                          |                         |    |    |   |   |   |   |
|         |                        |                      |          |          | 496  | 791  | 528.7456   | 791.0000  |                                                            |                         |    |    |   |   |   |   |
| FN1412  | -1.714                 | 8.023                |          |          |      |      |            |           | AAL95605.1  5-methylthioribose kinase                      |                         |    |    |   |   |   |   |
|         |                        |                      |          |          |      |      |            |           |                                                            |                         |    |    |   |   |   |   |
| FN1413  | -1.868                 | 5.868                |          |          |      |      |            |           | AAL95606.1  Translation initiation factor EIF-2B subunit 1 |                         |    |    |   |   |   |   |
|         |                        |                      |          |          |      |      |            |           |                                                            |                         |    |    |   |   |   |   |
| FN1415  | 0.144                  | 7.257                |          |          |      |      |            |           | AAL95608.1  NADH-dependent butanol dehydrogenase A         |                         |    |    |   |   |   |   |
|         |                        |                      |          |          | 11   |      | 16.0666    |           |                                                            |                         |    |    |   |   |   |   |
| FN1416  | -2.677                 | 6.677                |          |          |      |      |            |           | AAL95609.1  Transcriptional regulator, GntR family         |                         |    |    |   |   |   |   |
|         |                        |                      |          |          | 24   | 4    | 25.5845    | 4.0000    |                                                            |                         |    |    |   |   |   |   |
| FN1417  | -0.201                 | 6.848                | 2.65e-1  | 4.708e-1 | 7    | 10   | 10.2242    | 13.0162   | AAL95610.1  L-fucose phosphate aldolase                    |                         |    |    |   |   |   |   |
|         |                        |                      |          |          | 12   | 7    | 12.7922    | 7.0000    |                                                            |                         |    |    |   |   |   |   |
| FN1418  | -0.344                 | 3.919                |          |          |      |      |            |           | AAL95611.1  Transcriptional regulator, GntR family         |                         |    |    |   |   |   |   |
|         |                        |                      |          |          |      |      |            |           |                                                            |                         |    |    |   |   |   |   |
| FN1419  | -0.834                 | 24.301               | 1.532e-1 | 1.982e-1 | 6075 | 2104 | 8873.1176  | 2738.6012 | AAL95612.1  Methionine gamma-lyase                         |                         |    |    |   |   |   |   |
|         |                        |                      |          |          | 3065 | 4072 | 3267.3491  | 4072.0000 |                                                            |                         |    |    |   |   |   |   |
| FN1420  |                        |                      |          |          |      |      |            |           | AAL95613.1  NA+/H+ antiporter NHAC                         |                         |    |    |   |   |   |   |
|         |                        |                      |          |          | 44   |      | 64.2662    |           |                                                            |                         |    |    |   |   |   |   |
| FN1421  | -0.421                 | 21.950               | 2.063e-1 | 3.271e-1 | 2193 | 1356 | 3203.0859  | 1764.9921 | AAL95614.1  Pyruvate-flavodoxin oxidoreductase             |                         |    |    |   |   |   |   |
|         |                        |                      |          |          | 1365 | 1714 | 1455.1163  | 1714.0000 |                                                            |                         |    |    |   |   |   |   |
| FN1423  | 1.226                  | 14.689               | 4.488e-2 | 1.858e-2 | 36   | 186  | 52.5814    | 242.1007  | AAL95616.1  Flavoprotein                                   |                         |    |    |   |   |   |   |
|         |                        |                      |          |          | 150  | 255  | 159.9029   | 255.0000  |                                                            |                         |    |    |   |   |   |   |

Show detected proteins only  
 Show all proteins  
 Filter by category:

Proteins found: 1313

Enter (or paste) list of ORFs

Find ORFs

Test Cutoff

q-Value

p-Value

.005

| Signif | Direction | Applies To   |
|--------|-----------|--------------|
| yes    | +         | ratios, bars |
| no     | n/a       | bars         |
| yes    | -         | ratios, bars |
| yes    | +         | p-, q-Values |
| yes    | -         | p-, q-Values |

Dot Plots  Dot Plots



Fn Summary Table FnPg vs Fn FnSg vs Fn FnPgSg vs Fn FnPgSg vs FnPg FnSg vs FnPg FnPgSg vs FnSg Fn Coverage

| Protein | FnSg vs FnPg           |                      |          |          | Raw  |      | Normalized |          | Description                                                                         | Log <sub>2</sub> Ratios |    |    |   |   |   |   |
|---------|------------------------|----------------------|----------|----------|------|------|------------|----------|-------------------------------------------------------------------------------------|-------------------------|----|----|---|---|---|---|
|         | Log <sub>2</sub> Ratio | Log <sub>2</sub> Sum | q-Value  | p-Value  | FnPg | FnSg | FnPg       | FnSg     |                                                                                     | -6                      | -4 | -2 | 0 | 2 | 4 | 6 |
| FN1424  | 1.643                  | 16.405               | 1.887e-2 | 4.262e-3 | 45   | 362  | 65.7268    | 471.1852 | AAL95617.1  ACYL-COA dehydrogenase, short-chain specific                            |                         |    |    |   |   |   |   |
|         |                        |                      |          |          | 251  | 570  | 267.5708   | 570.0000 |                                                                                     |                         |    |    |   |   |   |   |
| FN1426  | 1.070                  | 15.537               | 7.141e-2 | 4.299e-2 | 44   | 232  | 64.2662    | 301.9750 | AAL95619.1  Serine protease                                                         |                         |    |    |   |   |   |   |
|         |                        |                      |          |          | 222  | 330  | 236.6563   | 330.0000 |                                                                                     |                         |    |    |   |   |   |   |
| FN1427  |                        |                      |          |          |      |      |            |          | AAL95620.1  Phenazine biosynthesis protein phzF                                     |                         |    |    |   |   |   |   |
|         |                        |                      |          |          | 10   |      | 10.6602    |          |                                                                                     |                         |    |    |   |   |   |   |
| FN1432  |                        |                      |          |          |      |      |            |          | AAL95625.1  Leucine-, isoleucine-, valine-, threonine-, and alanine-binding protein |                         |    |    |   |   |   |   |
|         |                        |                      |          |          |      | 4    |            | 4.0000   |                                                                                     |                         |    |    |   |   |   |   |
| FN1433  | -0.581                 | 15.783               | 8.306e-4 | 2.149e-5 | 202  | 150  | 295.0403   | 195.2425 | AAL95626.1  Short chain dehydrogenase                                               |                         |    |    |   |   |   |   |
|         |                        |                      |          |          | 268  | 193  | 285.6932   | 193.0000 |                                                                                     |                         |    |    |   |   |   |   |
| FN1434  | 0.447                  | 13.985               | 1.195e-1 | 1.186e-1 | 53   | 114  | 77.4116    | 148.3843 | AAL95627.1  Tetratricopeptide repeat family protein                                 |                         |    |    |   |   |   |   |
|         |                        |                      |          |          | 132  | 149  | 140.7145   | 149.0000 |                                                                                     |                         |    |    |   |   |   |   |
| FN1437  | -0.852                 | 12.982               | 1.088e-1 | 9.949e-2 | 110  | 56   | 160.6655   | 72.8905  | AAL95630.1  LSU ribosomal protein L28P                                              |                         |    |    |   |   |   |   |
|         |                        |                      |          |          | 76   | 61   | 81.0175    | 61.0000  |                                                                                     |                         |    |    |   |   |   |   |
| FN1439  | -1.461                 | 7.770                |          |          |      | 6    |            | 7.8097   | AAL95632.1  Transcriptional regulator, DeoR family                                  |                         |    |    |   |   |   |   |
|         |                        |                      |          |          | 23   | 10   | 24.5184    | 10.0000  |                                                                                     |                         |    |    |   |   |   |   |
| FN1440  | -0.941                 | 9.564                | 4.847e-2 | 2.137e-2 | 23   | 9    | 33.5937    | 11.7145  | AAL95633.1  1-phosphofructokinase                                                   |                         |    |    |   |   |   |   |
|         |                        |                      |          |          | 40   | 28   | 42.6408    | 28.0000  |                                                                                     |                         |    |    |   |   |   |   |
| FN1441  | 1.148                  | 12.880               | 4.152e-2 | 1.608e-2 | 20   | 111  | 29.2119    | 144.4794 | AAL95634.1  PTS system, fructose-specific IIABC component                           |                         |    |    |   |   |   |   |
|         |                        |                      |          |          | 82   | 114  | 87.4136    | 114.0000 |                                                                                     |                         |    |    |   |   |   |   |
| FN1444  | -0.356                 | 17.577               | 4.469e-2 | 1.842e-2 | 374  | 274  | 546.2627   | 356.6429 | AAL95637.1  GMP synthase (glutamine-hydrolyzing)                                    |                         |    |    |   |   |   |   |
|         |                        |                      |          |          | 426  | 425  | 454.1242   | 425.0000 |                                                                                     |                         |    |    |   |   |   |   |
| FN1445  | -0.401                 | 8.302                | 1.329e-1 | 1.462e-1 | 17   | 13   | 24.8301    | 16.9210  | AAL95638.1  DNA helicase                                                            |                         |    |    |   |   |   |   |
|         |                        |                      |          |          | 15   | 14   | 15.9903    | 14.0000  |                                                                                     |                         |    |    |   |   |   |   |
| FN1448  |                        |                      |          |          |      |      |            |          | AAL95641.1  Hypothetical cytosolic protein                                          |                         |    |    |   |   |   |   |
|         |                        |                      |          |          |      | 4    |            | 4.0000   |                                                                                     |                         |    |    |   |   |   |   |
| FN1449  | -1.330                 | 10.579               | 6.598e-2 | 3.709e-2 | 55   | 21   | 80.3328    | 27.3339  | AAL95642.1  Fusobacterium outer membrane protein family                             |                         |    |    |   |   |   |   |
|         |                        |                      |          |          | 41   | 22   | 43.7068    | 22.0000  |                                                                                     |                         |    |    |   |   |   |   |
| FN1450  | 0.976                  | 9.500                |          |          |      | 29   |            | 37.7469  | AAL95643.1  Integral membrane protein                                               |                         |    |    |   |   |   |   |
|         |                        |                      |          |          | 18   |      | 19.1883    |          |                                                                                     |                         |    |    |   |   |   |   |
| FN1451  | 0.625                  | 15.589               | 2.416e-3 | 1.684e-4 | 120  | 204  | 175.2715   | 265.5298 | AAL95644.1  Cell division protein ftsZ                                              |                         |    |    |   |   |   |   |
|         |                        |                      |          |          | 171  | 286  | 182.2893   | 286.0000 |                                                                                     |                         |    |    |   |   |   |   |

Show detected proteins only  
 Show all proteins  
 Filter by category:

Proteins found: 1313

Enter (or paste) list of ORFs

Find ORFs

Test Cutoff

q-Value p-Value

.005

| Signif | Direction | Applies To   |
|--------|-----------|--------------|
| yes    | +         | ratios, bars |
| no     | n/a       | bars         |
| yes    | -         | ratios, bars |
| yes    | +         | p-, q-Values |
| yes    | -         | p-, q-Values |

Dot Plots Dot Plots

Fn Summary Table FnPg vs Fn FnSg vs Fn FnPgSg vs Fn FnPgSg vs FnPg FnSg vs FnPg FnPgSg vs FnSg Fn Coverage

| Protein | FnSg vs FnPg           |                      |          |          | Raw  |      |          |          | Normalized                                                                                      |    |    |    | Log <sub>2</sub> Ratios |   |   |   |  |
|---------|------------------------|----------------------|----------|----------|------|------|----------|----------|-------------------------------------------------------------------------------------------------|----|----|----|-------------------------|---|---|---|--|
|         | Log <sub>2</sub> Ratio | Log <sub>2</sub> Sum | q-Value  | p-Value  | FnPg | FnSg | FnPg     | FnSg     | Description                                                                                     |    |    |    |                         |   |   |   |  |
|         |                        |                      |          |          |      |      |          |          |                                                                                                 | -6 | -4 | -2 | 0                       | 2 | 4 | 6 |  |
| FN1452  | 0.325                  | 14.157               | 8.838e-2 | 6.682e-2 | 96   | 108  | 140.2172 | 140.5746 | AAL95645.1  Cell division protein ftsA                                                          |    |    |    |                         |   |   |   |  |
|         |                        |                      |          |          | 95   | 162  | 101.2718 | 162.0000 |                                                                                                 |    |    |    |                         |   |   |   |  |
| FN1454  | 0.113                  | 9.082                |          |          |      | 8    |          | 10.4129  | AAL95647.1  D-alanine--D-alanine ligase                                                         |    |    |    |                         |   |   |   |  |
|         |                        |                      |          |          | 21   | 38   | 22.3864  | 38.0000  |                                                                                                 |    |    |    |                         |   |   |   |  |
| FN1455  | -0.170                 | 8.801                | 2.695e-1 | 4.816e-1 | 19   | 16   | 27.7513  | 20.8259  | AAL95648.1  UDP-N-acetylenolpyruvoylglucosamine reductase                                       |    |    |    |                         |   |   |   |  |
|         |                        |                      |          |          | 16   | 19   | 17.0563  | 19.0000  |                                                                                                 |    |    |    |                         |   |   |   |  |
| FN1456  | 0.191                  | 11.853               | 6.143e-2 | 3.269e-2 | 40   | 53   | 58.4238  | 68.9857  | AAL95649.1  UDP-N-acetylmuramate--alanine ligase                                                |    |    |    |                         |   |   |   |  |
|         |                        |                      |          |          | 52   | 61   | 55.4330  | 61.0000  |                                                                                                 |    |    |    |                         |   |   |   |  |
| FN1457  | 0.203                  | 11.144               | 3.468e-1 | 6.931e-1 | 14   | 50   | 20.4483  | 65.0808  | AAL95650.1  UDP-N-acetylglucosamine-N-acetylmuramyl-Pentapeptide pyrophosphoryl-undecaprenol N- |    |    |    |                         |   |   |   |  |
|         |                        |                      |          |          | 64   | 37   | 68.2252  | 37.0000  |                                                                                                 |    |    |    |                         |   |   |   |  |
| FN1458  | -0.401                 | 12.411               | 2.487e-1 | 4.318e-1 | 84   | 38   | 122.6900 | 49.4614  | AAL95651.1  UDP-N-acetylmuramoylalanine--D-glutamate ligase                                     |    |    |    |                         |   |   |   |  |
|         |                        |                      |          |          | 44   | 79   | 46.9048  | 79.0000  |                                                                                                 |    |    |    |                         |   |   |   |  |
| FN1461  | -0.451                 | 9.264                | 1.945e-1 | 2.999e-1 | 20   | 8    | 29.2119  | 10.4129  | AAL95654.1  Histidinol-phosphatase                                                              |    |    |    |                         |   |   |   |  |
|         |                        |                      |          |          | 27   | 32   | 28.7825  | 32.0000  |                                                                                                 |    |    |    |                         |   |   |   |  |
| FN1462  |                        |                      |          |          |      | 3    |          | 3.9048   | AAL95655.1  Transcriptional regulator, GntR family                                              |    |    |    |                         |   |   |   |  |
|         |                        |                      |          |          |      |      |          |          |                                                                                                 |    |    |    |                         |   |   |   |  |
| FN1463  | 0.222                  | 17.197               | 1.422e-1 | 1.686e-1 | 285  | 332  | 416.2697 | 432.1367 | AAL95656.1  pyridoxine biosynthesis protein                                                     |    |    |    |                         |   |   |   |  |
|         |                        |                      |          |          | 283  | 405  | 301.6835 | 405.0000 |                                                                                                 |    |    |    |                         |   |   |   |  |
| FN1464  | 0.648                  | 16.496               | 1.192e-1 | 1.179e-1 | 91   | 302  | 132.9142 | 393.0882 | AAL95657.1  1-deoxyxylulose-5-phosphate synthase                                                |    |    |    |                         |   |   |   |  |
|         |                        |                      |          |          | 331  | 368  | 352.8524 | 368.0000 |                                                                                                 |    |    |    |                         |   |   |   |  |
| FN1470  | -1.764                 | 6.380                | 5.236e-2 | 2.485e-2 | 15   | 3    | 21.9089  | 3.9048   | AAL95663.1  Hypothetical protein                                                                |    |    |    |                         |   |   |   |  |
|         |                        |                      |          |          | 11   | 6    | 11.7262  | 6.0000   |                                                                                                 |    |    |    |                         |   |   |   |  |
| FN1471  |                        |                      |          |          |      | 3    |          | 3.9048   | AAL95664.1  LACI-family transcription regulator                                                 |    |    |    |                         |   |   |   |  |
|         |                        |                      |          |          |      | 4    |          | 4.0000   |                                                                                                 |    |    |    |                         |   |   |   |  |
| FN1472  | -0.154                 | 9.518                | 3.807e-1 | 8.026e-1 | 7    | 21   | 10.2242  | 27.3339  | AAL95665.1  N-acetylneuraminate-binding protein                                                 |    |    |    |                         |   |   |   |  |
|         |                        |                      |          |          | 44   | 24   | 46.9048  | 24.0000  |                                                                                                 |    |    |    |                         |   |   |   |  |
| FN1475  | -0.916                 | 7.560                |          |          | 20   |      | 29.2119  |          | AAL95668.1  N-acetylneuraminate lyase                                                           |    |    |    |                         |   |   |   |  |
|         |                        |                      |          |          | 8    | 10   | 8.5282   | 10.0000  |                                                                                                 |    |    |    |                         |   |   |   |  |
| FN1478  | -0.235                 | 8.996                |          |          |      | 16   |          | 20.8259  | AAL95671.1  Hypothetical protein                                                                |    |    |    |                         |   |   |   |  |
|         |                        |                      |          |          | 23   |      | 24.5184  |          |                                                                                                 |    |    |    |                         |   |   |   |  |
| FN1479  | 0.140                  | 9.019                | 3.305e-1 | 6.446e-1 | 10   | 16   | 14.6060  | 20.8259  | AAL95672.1  Hypothetical protein                                                                |    |    |    |                         |   |   |   |  |
|         |                        |                      |          |          | 27   | 27   | 28.7825  | 27.0000  |                                                                                                 |    |    |    |                         |   |   |   |  |

Show detected proteins only  
 Show all proteins  
 Filter by category:

Proteins found: 1313

Test Cutoff

| Signif | Direction | Applies To   |
|--------|-----------|--------------|
| yes    | +         | ratios, bars |
| no     | n/a       | bars         |
| yes    | -         | ratios, bars |
| yes    | +         | p-, q-Values |
| yes    | -         | p-, q-Values |

Fn Summary Table FnPg vs Fn FnSg vs Fn FnPgSg vs Fn FnPgSg vs FnPg FnSg vs FnPg FnPgSg vs FnSg Fn Coverage

| Protein | FnSg vs FnPg           |                      |          |          | Raw  |      | Normalized |          | Description                                                           | Log <sub>2</sub> Ratios |    |    |   |   |   |   |
|---------|------------------------|----------------------|----------|----------|------|------|------------|----------|-----------------------------------------------------------------------|-------------------------|----|----|---|---|---|---|
|         | Log <sub>2</sub> Ratio | Log <sub>2</sub> Sum | q-Value  | p-Value  | FnPg | FnSg | FnPg       | FnSg     |                                                                       |                         |    |    |   |   |   |   |
|         |                        |                      |          |          |      |      |            |          |                                                                       | -6                      | -4 | -2 | 0 | 2 | 4 | 6 |
| FN1480  | 0.763                  | 9.477                | 5.914e-3 | 7.434e-4 | 12   | 25   | 17.5271    | 32.5404  | AAL95673.1  MG2+ transporter MGTE                                     |                         |    |    |   |   |   |   |
|         |                        |                      |          |          | 22   | 37   | 23.4524    | 37.0000  |                                                                       |                         |    |    |   |   |   |   |
| FN1481  | -0.602                 | 7.232                | 1.709e-1 | 2.403e-1 | 9    | 3    | 13.1454    | 3.9048   | AAL95674.1  Queuine tRNA-ribosyltransferase                           |                         |    |    |   |   |   |   |
|         |                        |                      |          |          | 16   | 16   | 17.0563    | 16.0000  |                                                                       |                         |    |    |   |   |   |   |
| FN1482  | 0.879                  | 12.407               | 3.005e-2 | 9.148e-3 | 35   | 66   | 51.1208    | 85.9067  | AAL95675.1  Guanosine-3',5'-bis (Diphosphate) 3'-pyrophosphohydrolase |                         |    |    |   |   |   |   |
|         |                        |                      |          |          | 54   | 114  | 57.5650    | 114.0000 |                                                                       |                         |    |    |   |   |   |   |
| FN1483  | -0.344                 | 9.581                | 4.053e-2 | 1.54e-2  | 23   | 17   | 33.5937    | 22.1275  | AAL95676.1  Adenine phosphoribosyltransferase                         |                         |    |    |   |   |   |   |
|         |                        |                      |          |          | 27   | 27   | 28.7825    | 27.0000  |                                                                       |                         |    |    |   |   |   |   |
| FN1484  |                        |                      |          |          |      | 4    |            | 5.2065   | AAL95677.1  Tetratricopeptide repeat family protein                   |                         |    |    |   |   |   |   |
|         |                        |                      |          |          |      | 10   |            | 10.0000  |                                                                       |                         |    |    |   |   |   |   |
| FN1485  |                        |                      |          |          |      |      |            |          | AAL95678.1  Transporter                                               |                         |    |    |   |   |   |   |
|         |                        |                      |          |          |      | 4    |            | 4.0000   |                                                                       |                         |    |    |   |   |   |   |
| FN1486  |                        |                      |          |          |      |      |            |          | AAL95679.1  magnesium and cobalt efflux protein CorC                  |                         |    |    |   |   |   |   |
|         |                        |                      |          |          |      | 5    |            | 5.0000   |                                                                       |                         |    |    |   |   |   |   |
| FN1487  | 0.443                  | 13.807               | 1.471e-1 | 1.82e-1  | 45   | 110  | 65.7268    | 143.1778 | AAL95681.1  Chorismate mutase                                         |                         |    |    |   |   |   |   |
|         |                        |                      |          |          | 131  | 136  | 139.6485   | 136.0000 |                                                                       |                         |    |    |   |   |   |   |
| FN1488  | -0.402                 | 8.577                |          |          | 22   |      | 32.1331    |          | AAL95682.1  Methylenetetrahydrofolate dehydrogenase (NADP+)           |                         |    |    |   |   |   |   |
|         |                        |                      |          |          | 12   | 17   | 12.7922    | 17.0000  |                                                                       |                         |    |    |   |   |   |   |
| FN1489  | 0.216                  | 8.901                | 1.864e-1 | 2.785e-1 | 11   | 17   | 16.0666    | 22.1275  | AAL95683.1  Methionyl-tRNA formyltransferase                          |                         |    |    |   |   |   |   |
|         |                        |                      |          |          | 23   | 25   | 24.5184    | 25.0000  |                                                                       |                         |    |    |   |   |   |   |
| FN1490  | 0.828                  | 9.215                | 1.076e-1 | 9.738e-2 | 9    | 33   | 13.1454    | 42.9533  | AAL95684.1  putative regulatory protein                               |                         |    |    |   |   |   |   |
|         |                        |                      |          |          | 22   | 22   | 23.4524    | 22.0000  |                                                                       |                         |    |    |   |   |   |   |
| FN1491  | 0.777                  | 7.605                |          |          |      | 15   |            | 19.5242  | AAL95685.1  PTS system, IIA component                                 |                         |    |    |   |   |   |   |
|         |                        |                      |          |          | 10   | 17   | 10.6602    | 17.0000  |                                                                       |                         |    |    |   |   |   |   |
| FN1492  |                        |                      |          |          |      |      |            |          | AAL95686.1  DNA repair protein recO                                   |                         |    |    |   |   |   |   |
|         |                        |                      |          |          |      | 4    |            | 4.0000   |                                                                       |                         |    |    |   |   |   |   |
| FN1493  | -1.000                 | 6.049                | 8.03e-3  | 1.268e-3 | 7    | 5    | 10.2242    | 6.5081   | AAL95687.1  Hypothetical protein                                      |                         |    |    |   |   |   |   |
|         |                        |                      |          |          | 12   | 5    | 12.7922    | 5.0000   |                                                                       |                         |    |    |   |   |   |   |
| FN1494  | 0.033                  | 6.861                |          |          |      | 6    |            | 7.8097   | AAL95680.1  Rod shape-determining protein mreC                        |                         |    |    |   |   |   |   |
|         |                        |                      |          |          | 10   | 14   | 10.6602    | 14.0000  |                                                                       |                         |    |    |   |   |   |   |
| FN1496  | 0.033                  | 6.861                |          |          |      | 6    |            | 7.8097   | AAL95680.1  Rod shape-determining protein mreC                        |                         |    |    |   |   |   |   |
|         |                        |                      |          |          | 10   | 14   | 10.6602    | 14.0000  |                                                                       |                         |    |    |   |   |   |   |

Show detected proteins only  
 Show all proteins  
 Filter by category:

Proteins found: 1313

Test Cutoff

| Signif | Direction | Applies To   |
|--------|-----------|--------------|
| yes    | +         | ratios, bars |
| no     | n/a       | bars         |
| yes    | -         | ratios, bars |
| yes    | +         | p-, q-Values |
| yes    | -         |              |

Fn Summary Table FnPg vs Fn FnSg vs Fn FnPgSg vs Fn FnPgSg vs FnPg FnSg vs FnPg FnPgSg vs FnSg Fn Coverage

| Protein | FnSg vs FnPg           |                      |          |          | Raw  |      |           |          | Normalized                                                        |      |      |      | Description | Log <sub>2</sub> Ratios |    |    |   |   |   |   |
|---------|------------------------|----------------------|----------|----------|------|------|-----------|----------|-------------------------------------------------------------------|------|------|------|-------------|-------------------------|----|----|---|---|---|---|
|         | Log <sub>2</sub> Ratio | Log <sub>2</sub> Sum | q-Value  | p-Value  | FnPg | FnSg | FnPg      | FnSg     | FnPg                                                              | FnSg | FnPg | FnSg |             |                         |    |    |   |   |   |   |
|         |                        |                      |          |          |      |      |           |          |                                                                   |      |      |      |             | -6                      | -4 | -2 | 0 | 2 | 4 | 6 |
| FN1499  | -1.272                 | 10.444               | 1.659e-1 | 2.285e-1 | 13   | 20   | 18.9877   | 26.0323  | AAL93625.1  Cell surface protein                                  |      |      |      | ■           |                         |    |    |   |   |   |   |
|         |                        |                      |          |          | 91   | 22   | 97.0078   | 22.0000  |                                                                   |      |      |      |             |                         |    |    |   |   |   |   |
| FN1504  | 0.694                  | 13.114               | 1.224e-1 | 1.242e-1 | 43   | 121  | 62.8056   | 157.4956 | AAL93630.1  Nickel-binding protein                                |      |      |      | ■           |                         |    |    |   |   |   |   |
|         |                        |                      |          |          | 80   | 82   | 85.2815   | 82.0000  |                                                                   |      |      |      |             |                         |    |    |   |   |   |   |
| FN1505  | -0.443                 | 15.941               | 6.778e-2 | 3.897e-2 | 172  | 183  | 251.2224  | 238.1958 | AAL93631.1  6,7-dimethyl-8-ribityllumazine synthase               |      |      |      | ■           |                         |    |    |   |   |   |   |
|         |                        |                      |          |          | 313  | 192  | 333.6640  | 192.0000 |                                                                   |      |      |      |             |                         |    |    |   |   |   |   |
| FN1506  | -1.209                 | 7.549                |          |          | 19   |      | 27.7513   |          | AAL93632.1  Diaminohydroxyphosphoribosylaminopyrimidine deaminase |      |      |      | ■           |                         |    |    |   |   |   |   |
|         |                        |                      |          |          | 13   | 9    | 13.8583   | 9.0000   |                                                                   |      |      |      |             |                         |    |    |   |   |   |   |
| FN1507  |                        |                      |          |          |      |      |           |          | AAL93633.1  Riboflavin synthase alpha chain                       |      |      |      |             |                         |    |    |   |   |   |   |
|         |                        |                      |          |          |      | 8    |           | 8.0000   |                                                                   |      |      |      |             |                         |    |    |   |   |   |   |
| FN1508  | -0.792                 | 12.746               | 1.003e-1 | 8.55e-2  | 53   | 33   | 77.4116   | 42.9533  | AAL93634.1  GTP cyclohydrolase II                                 |      |      |      | ■           |                         |    |    |   |   |   |   |
|         |                        |                      |          |          | 132  | 83   | 140.7145  | 83.0000  |                                                                   |      |      |      |             |                         |    |    |   |   |   |   |
| FN1517  | -0.411                 | 15.052               | 1.736e-1 | 2.47e-1  | 102  | 115  | 148.9807  | 149.6859 | AAL93643.1  Leucyl-tRNA synthetase                                |      |      |      | ■           |                         |    |    |   |   |   |   |
|         |                        |                      |          |          | 259  | 170  | 276.0990  | 170.0000 |                                                                   |      |      |      |             |                         |    |    |   |   |   |   |
| FN1518  |                        |                      |          |          |      |      |           |          | AAL93644.1  RNA polymerase sigma-H factor                         |      |      |      |             |                         |    |    |   |   |   |   |
|         |                        |                      |          |          |      | 6    |           | 6.0000   |                                                                   |      |      |      |             |                         |    |    |   |   |   |   |
| FN1519  | 0.452                  | 8.038                |          |          |      | 13   |           | 16.9210  | AAL93645.1  23S rRNA methyltransferase                            |      |      |      | ■           |                         |    |    |   |   |   |   |
|         |                        |                      |          |          | 13   | 21   | 13.8583   | 21.0000  |                                                                   |      |      |      |             |                         |    |    |   |   |   |   |
| FN1520  | 0.100                  | 10.114               | 3.942e-1 | 8.496e-1 | 9    | 23   | 13.1454   | 29.9372  | AAL93646.1  UDP-N-acetylglucosamine 1-carboxyvinyltransferase     |      |      |      |             |                         |    |    |   |   |   |   |
|         |                        |                      |          |          | 48   | 39   | 51.1689   | 39.0000  |                                                                   |      |      |      |             |                         |    |    |   |   |   |   |
| FN1523  | -0.203                 | 13.000               | 1.072e-1 | 9.664e-2 | 68   | 72   | 99.3205   | 93.7164  | AAL93649.1  Dipeptide-binding protein                             |      |      |      | ■           |                         |    |    |   |   |   |   |
|         |                        |                      |          |          | 89   | 75   | 94.8757   | 75.0000  |                                                                   |      |      |      |             |                         |    |    |   |   |   |   |
| FN1526  | -2.198                 | 20.190               | 1.055e-1 | 9.383e-2 | 2501 | 332  | 3652.9493 | 432.1367 | AAL93652.1  Fusobacterium outer membrane protein family           |      |      |      | ■           |                         |    |    |   |   |   |   |
|         |                        |                      |          |          | 968  | 589  | 1031.9067 | 589.0000 |                                                                   |      |      |      |             |                         |    |    |   |   |   |   |
| FN1527  | -0.218                 | 9.840                | 1.995e-1 | 3.118e-1 | 25   | 17   | 36.5149   | 22.1275  | AAL93653.1  Hypothetical protein                                  |      |      |      | ■           |                         |    |    |   |   |   |   |
|         |                        |                      |          |          | 27   | 34   | 28.7825   | 34.0000  |                                                                   |      |      |      |             |                         |    |    |   |   |   |   |
| FN1528  | 0.007                  | 11.708               | 4.299e-1 | 9.843e-1 | 52   | 33   | 75.9510   | 42.9533  | AAL93654.1  Hypothetical protein                                  |      |      |      |             |                         |    |    |   |   |   |   |
|         |                        |                      |          |          | 37   | 73   | 39.4427   | 73.0000  |                                                                   |      |      |      |             |                         |    |    |   |   |   |   |
| FN1529  | -2.247                 | 10.339               | 1.041e-1 | 9.151e-2 | 84   | 20   | 122.6900  | 26.0323  | AAL93655.1  Hypothetical protein                                  |      |      |      | ■           |                         |    |    |   |   |   |   |
|         |                        |                      |          |          | 32   | 7    | 34.1126   | 7.0000   |                                                                   |      |      |      |             |                         |    |    |   |   |   |   |
| FN1531  | 0.663                  | 10.961               | 9.296e-2 | 7.46e-2  | 15   | 41   | 21.9089   | 53.3663  | AAL93657.1  murein hydrolase export regulator                     |      |      |      | ■           |                         |    |    |   |   |   |   |
|         |                        |                      |          |          | 46   | 59   | 49.0369   | 59.0000  |                                                                   |      |      |      |             |                         |    |    |   |   |   |   |

Show detected proteins only  
 Show all proteins  
 Filter by category:

Proteins found: 1313

Enter (or paste) list of ORFs

Find ORFs

Test Cutoff

q-Value p-Value

.005

| Signif | Direction | Applies To   |
|--------|-----------|--------------|
| ■      | yes +     | ratios, bars |
| ■      | no n/a    | bars         |
| ■      | yes -     | ratios, bars |
| ■      | yes +     | p-, q-Values |
| ■      | yes -     | p-, q-Values |

Dot Plots Dot Plots

Fn Summary Table FnPg vs Fn FnSg vs Fn FnPgSg vs Fn FnPgSg vs FnPg FnSg vs FnPg FnPgSg vs FnSg Fn Coverage

| Protein | FnSg vs FnPg           |                      |          |          | Raw  |      |           |           | Normalized                                                                      |      |      |      | Description | Log <sub>2</sub> Ratios |    |    |   |   |   |   |
|---------|------------------------|----------------------|----------|----------|------|------|-----------|-----------|---------------------------------------------------------------------------------|------|------|------|-------------|-------------------------|----|----|---|---|---|---|
|         | Log <sub>2</sub> Ratio | Log <sub>2</sub> Sum | q-Value  | p-Value  | FnPg | FnSg | FnPg      | FnSg      | FnPg                                                                            | FnSg | FnPg | FnSg |             | -6                      | -4 | -2 | 0 | 2 | 4 | 6 |
| FN1533  | -0.991                 | 18.717               | 1.852e-1 | 2.753e-1 | 1043 | 329  | 1523.4011 | 428.2318  | AAL93659.1  Electron transfer flavoprotein alpha-subunit                        |      |      |      |             |                         |    |    |   |   |   |   |
|         |                        |                      |          |          | 307  | 503  | 327.2679  | 503.0000  |                                                                                 |      |      |      |             |                         |    |    |   |   |   |   |
| FN1534  | -0.777                 | 20.252               | 1.727e-1 | 2.449e-1 | 1502 | 651  | 2193.8144 | 847.3524  | AAL93660.1  Electron transfer flavoprotein beta-subunit                         |      |      |      |             |                         |    |    |   |   |   |   |
|         |                        |                      |          |          | 686  | 860  | 731.2892  | 860.0000  |                                                                                 |      |      |      |             |                         |    |    |   |   |   |   |
| FN1535  | -0.565                 | 21.956               | 3.373e-2 | 1.122e-2 | 1883 | 1107 | 2750.3013 | 1440.8895 | AAL93661.1  Acyl-CoA dehydrogenase, short-chain specific                        |      |      |      |             |                         |    |    |   |   |   |   |
|         |                        |                      |          |          | 2023 | 1875 | 2156.5570 | 1875.0000 |                                                                                 |      |      |      |             |                         |    |    |   |   |   |   |
| FN1536  | -0.292                 | 20.828               | 1.193e-1 | 1.182e-1 | 905  | 806  | 1321.8389 | 1049.1029 | AAL93662.1  (S)-2-hydroxy-acid oxidase chain D                                  |      |      |      |             |                         |    |    |   |   |   |   |
|         |                        |                      |          |          | 1593 | 1417 | 1698.1687 | 1417.0000 |                                                                                 |      |      |      |             |                         |    |    |   |   |   |   |
| FN1537  | -0.225                 | 4.868                |          |          | 4    |      | 5.8424    |           | AAL93663.1  Arsenical pump-driving ATPase                                       |      |      |      |             |                         |    |    |   |   |   |   |
|         |                        |                      |          |          |      | 5    |           | 5.0000    |                                                                                 |      |      |      |             |                         |    |    |   |   |   |   |
| FN1538  | 0.783                  | 8.680                | 4.243e-2 | 1.672e-2 | 8    | 17   | 11.6848   | 22.1275   | AAL93664.1  Arsenical pump-driving ATPase                                       |      |      |      |             |                         |    |    |   |   |   |   |
|         |                        |                      |          |          | 18   | 31   | 19.1883   | 31.0000   |                                                                                 |      |      |      |             |                         |    |    |   |   |   |   |
| FN1539  | -0.510                 | 15.861               | 1.176e-1 | 1.149e-1 | 246  | 162  | 359.3065  | 210.8619  | AAL93665.1  Iron-sulfur cluster-binding protein                                 |      |      |      |             |                         |    |    |   |   |   |   |
|         |                        |                      |          |          | 209  | 198  | 222.7980  | 198.0000  |                                                                                 |      |      |      |             |                         |    |    |   |   |   |   |
| FN1540  | -0.281                 | 17.811               | 1.944e-1 | 2.997e-1 | 450  | 355  | 657.2680  | 462.0739  | AAL93666.1  Iron-sulfur cluster-binding protein                                 |      |      |      |             |                         |    |    |   |   |   |   |
|         |                        |                      |          |          | 375  | 408  | 399.7572  | 408.0000  |                                                                                 |      |      |      |             |                         |    |    |   |   |   |   |
| FN1544  | -0.315                 | 18.849               | 2.807e-1 | 5.095e-1 | 762  | 428  | 1112.9738 | 557.0919  | AAL93670.1  Probable electron transfer flavoprotein-quinone oxidoreductase ydiS |      |      |      |             |                         |    |    |   |   |   |   |
|         |                        |                      |          |          | 394  | 675  | 420.0116  | 675.0000  |                                                                                 |      |      |      |             |                         |    |    |   |   |   |   |
| FN1545  | -1.939                 | 12.421               | 1.475e-1 | 1.832e-1 | 173  | 32   | 252.6830  | 41.6517   | AAL93671.1  Ferredoxin like protein                                             |      |      |      |             |                         |    |    |   |   |   |   |
|         |                        |                      |          |          | 35   | 34   | 37.3107   | 34.0000   |                                                                                 |      |      |      |             |                         |    |    |   |   |   |   |
| FN1546  | -0.526                 | 21.541               | 2.201e-1 | 3.6e-1   | 2138 | 1041 | 3122.7532 | 1354.9828 | AAL93672.1  Protein Translation Elongation Factor G (EF-G)                      |      |      |      |             |                         |    |    |   |   |   |   |
|         |                        |                      |          |          | 1003 | 1557 | 1069.2173 | 1557.0000 |                                                                                 |      |      |      |             |                         |    |    |   |   |   |   |
| FN1547  | -0.143                 | 13.916               | 2.21e-1  | 3.623e-1 | 76   | 95   | 111.0053  | 123.6536  | AAL93673.1  PTS permease for N-acetylglucosamine and glucose                    |      |      |      |             |                         |    |    |   |   |   |   |
|         |                        |                      |          |          | 141  | 113  | 150.3087  | 113.0000  |                                                                                 |      |      |      |             |                         |    |    |   |   |   |   |
| FN1548  | 0.120                  | 9.855                | 3.86e-1  | 8.207e-1 | 21   | 38   | 30.6725   | 49.4614   | AAL93674.1  Hypothetical protein                                                |      |      |      |             |                         |    |    |   |   |   |   |
|         |                        |                      |          |          | 26   | 14   | 27.7165   | 14.0000   |                                                                                 |      |      |      |             |                         |    |    |   |   |   |   |
| FN1549  | 0.348                  | 18.942               | 1.557e-1 | 2.042e-1 | 362  | 750  | 528.7356  | 976.2124  | AAL93675.1  Stomatin like protein                                               |      |      |      |             |                         |    |    |   |   |   |   |
|         |                        |                      |          |          | 684  | 625  | 729.1572  | 625.0000  |                                                                                 |      |      |      |             |                         |    |    |   |   |   |   |
| FN1552  | 1.078                  | 5.262                |          |          |      |      |           |           | AAL93678.1  abortive phage resistance protein                                   |      |      |      |             |                         |    |    |   |   |   |   |
|         |                        |                      |          |          | 4    | 9    | 4.2641    | 9.0000    |                                                                                 |      |      |      |             |                         |    |    |   |   |   |   |
| FN1553  | 0.978                  | 7.942                | 1.243e-1 | 1.279e-1 | 8    | 10   | 11.6848   | 13.0162   | AAL93679.1  abortive phage resistance protein                                   |      |      |      |             |                         |    |    |   |   |   |   |
|         |                        |                      |          |          | 10   | 31   | 10.6602   | 31.0000   |                                                                                 |      |      |      |             |                         |    |    |   |   |   |   |

Show detected proteins only  
 Show all proteins  
 Filter by category:

Proteins found: 1313

Enter (or paste) list of ORFs

Find ORFs

Test Cutoff

q-Value

p-Value

.005

| Signif      | Direction | Applies To |
|-------------|-----------|------------|
| red         | yes       | +          |
| yellow      | no        | n/a        |
| green       | yes       | -          |
| pink        | yes       | +          |
| light green | yes       | -          |

Applies To: ratios, bars; ratios, bars; p-, q-Values

Dot Plots

Fn Summary Table FnPg vs Fn FnSg vs Fn FnPgSg vs Fn FnPgSg vs FnPg FnSg vs FnPg FnPgSg vs FnSg Fn Coverage

| Protein | FnSg vs FnPg           |                      |          |          | Raw  |      |           |           | Normalized                                                            |      |      |      | Description | Log <sub>2</sub> Ratios |    |    |   |   |   |   |
|---------|------------------------|----------------------|----------|----------|------|------|-----------|-----------|-----------------------------------------------------------------------|------|------|------|-------------|-------------------------|----|----|---|---|---|---|
|         | Log <sub>2</sub> Ratio | Log <sub>2</sub> Sum | q-Value  | p-Value  | FnPg | FnSg | FnPg      | FnSg      | FnPg                                                                  | FnSg | FnPg | FnSg |             |                         |    |    |   |   |   |   |
|         |                        |                      |          |          |      |      |           |           |                                                                       |      |      |      |             | -6                      | -4 | -2 | 0 | 2 | 4 | 6 |
| FN1554  | -0.451                 | 15.586               | 8.303e-2 | 5.837e-2 | 158  | 114  | 230.7741  | 148.3843  | AAL93680.1  Fusobacterium outer membrane protein family               |      |      |      |             |                         |    |    |   |   |   |   |
|         |                        |                      |          |          | 270  | 231  | 287.8252  | 231.0000  |                                                                       |      |      |      |             |                         |    |    |   |   |   |   |
| FN1555  | 0.168                  | 23.924               | 2.456e-3 | 1.746e-4 | 2528 | 3291 | 3692.3854 | 4283.6201 | AAL93681.1  Protein Translation Elongation Factor Tu                  |      |      |      |             |                         |    |    |   |   |   |   |
|         |                        |                      |          |          | 3600 | 4174 | 3837.6694 | 4174.0000 |                                                                       |      |      |      |             |                         |    |    |   |   |   |   |
| FN1556  | -0.413                 | 18.954               | 9.26e-2  | 7.395e-2 | 621  | 372  | 907.0298  | 484.2014  | AAL93682.1  Protein Translation Elongation Factor G (EF-G)            |      |      |      |             |                         |    |    |   |   |   |   |
|         |                        |                      |          |          | 692  | 751  | 737.6853  | 751.0000  |                                                                       |      |      |      |             |                         |    |    |   |   |   |   |
| FN1557  | -0.358                 | 14.678               | 1.171e-3 | 4.066e-5 | 124  | 113  | 181.1138  | 147.0827  | AAL93683.1  SSU ribosomal protein S7P                                 |      |      |      |             |                         |    |    |   |   |   |   |
|         |                        |                      |          |          | 174  | 139  | 185.4874  | 139.0000  |                                                                       |      |      |      |             |                         |    |    |   |   |   |   |
| FN1558  |                        |                      |          |          | 128  |      | 186.9562  |           | AAL93684.1  SSU ribosomal protein S12P                                |      |      |      |             |                         |    |    |   |   |   |   |
|         |                        |                      |          |          | 32   |      | 34.1126   |           |                                                                       |      |      |      |             |                         |    |    |   |   |   |   |
| FN1560  | 1.286                  | 14.864               | 8.326e-2 | 5.871e-2 | 12   | 200  | 17.5271   | 260.3233  | AAL93686.1  unknown                                                   |      |      |      |             |                         |    |    |   |   |   |   |
|         |                        |                      |          |          | 191  | 279  | 203.6097  | 279.0000  |                                                                       |      |      |      |             |                         |    |    |   |   |   |   |
| FN1562  | 1.011                  | 6.833                | 4.761e-2 | 2.068e-2 | 3    | 11   | 4.3818    | 14.3178   | AAL93688.1  Phospho-2-dehydro-3-deoxyheptonate aldolase               |      |      |      |             |                         |    |    |   |   |   |   |
|         |                        |                      |          |          | 10   | 16   | 10.6602   | 16.0000   |                                                                       |      |      |      |             |                         |    |    |   |   |   |   |
| FN1576  |                        |                      |          |          |      | 5    |           | 6.5081    | AAL93691.1  ATPases and helicase subunits involved in DNA replication |      |      |      |             |                         |    |    |   |   |   |   |
|         |                        |                      |          |          |      |      |           |           |                                                                       |      |      |      |             |                         |    |    |   |   |   |   |
| FN1577  | 0.696                  | 16.606               | 7.488e-2 | 4.715e-2 | 112  | 325  | 163.5867  | 423.0254  | AAL93692.1  Rod shape-determining protein mreB                        |      |      |      |             |                         |    |    |   |   |   |   |
|         |                        |                      |          |          | 312  | 381  | 332.5980  | 381.0000  |                                                                       |      |      |      |             |                         |    |    |   |   |   |   |
| FN1579  | 0.292                  | 13.243               | 1.894e-1 | 2.863e-1 | 43   | 76   | 62.8056   | 98.9229   | AAL93694.1  CysteinyI-tRNA synthetase                                 |      |      |      |             |                         |    |    |   |   |   |   |
|         |                        |                      |          |          | 108  | 119  | 115.1301  | 119.0000  |                                                                       |      |      |      |             |                         |    |    |   |   |   |   |
| FN1580  |                        |                      |          |          |      | 3    |           | 3.0000    | AAL93695.1  2-C-methyl-D-erythritol 4-phosphate cytidylyltransferase  |      |      |      |             |                         |    |    |   |   |   |   |
|         |                        |                      |          |          |      |      |           |           |                                                                       |      |      |      |             |                         |    |    |   |   |   |   |
| FN1581  | 0.985                  | 11.419               | 3.48e-2  | 1.189e-2 | 21   | 67   | 30.6725   | 87.2083   | AAL93696.1  DNA mismatch repair protein mutS                          |      |      |      |             |                         |    |    |   |   |   |   |
|         |                        |                      |          |          | 41   | 60   | 43.7068   | 60.0000   |                                                                       |      |      |      |             |                         |    |    |   |   |   |   |
| FN1582  | -0.040                 | 9.063                |          |          |      | 12   |           | 15.6194   | AAL93697.1  Hypothetical protein                                      |      |      |      |             |                         |    |    |   |   |   |   |
|         |                        |                      |          |          | 22   | 30   | 23.4524   | 30.0000   |                                                                       |      |      |      |             |                         |    |    |   |   |   |   |
| FN1586  | -0.890                 | 7.635                |          |          |      | 9    |           | 11.7145   | AAL93701.1  O-succinylbenzoate-CoA synthase                           |      |      |      |             |                         |    |    |   |   |   |   |
|         |                        |                      |          |          | 18   | 9    | 19.1883   | 9.0000    |                                                                       |      |      |      |             |                         |    |    |   |   |   |   |
| FN1589  | 0.973                  | 9.052                | 8.254e-2 | 5.765e-2 | 5    | 25   | 7.3030    | 32.5404   | AAL93704.1  LexA repressor                                            |      |      |      |             |                         |    |    |   |   |   |   |
|         |                        |                      |          |          | 24   | 32   | 25.5845   | 32.0000   |                                                                       |      |      |      |             |                         |    |    |   |   |   |   |
| FN1590  | -0.431                 | 4.397                |          |          |      | 3    |           | 3.9048    | AAL93705.1  Hypothetical lipoprotein                                  |      |      |      |             |                         |    |    |   |   |   |   |
|         |                        |                      |          |          | 5    | 4    | 5.3301    | 4.0000    |                                                                       |      |      |      |             |                         |    |    |   |   |   |   |

Show detected proteins only  
 Show all proteins  
 Filter by category:

Proteins found: 1313

Test Cutoff

| Signif | Direction | Applies To   |
|--------|-----------|--------------|
| yes    | +         | ratios, bars |
| no     | n/a       | bars         |
| yes    | -         | ratios, bars |
| yes    | +         | p-, q-Values |
| yes    | -         |              |

Fn Summary Table FnPg vs Fn FnSg vs Fn FnPgSg vs Fn FnPgSg vs FnPg FnSg vs FnPg FnPgSg vs FnSg Fn Coverage

| Protein | FnSg vs FnPg           |                      |          |          | Raw  |      | Normalized |          | Description                                                      | Log <sub>2</sub> Ratios |    |    |   |   |   |   |
|---------|------------------------|----------------------|----------|----------|------|------|------------|----------|------------------------------------------------------------------|-------------------------|----|----|---|---|---|---|
|         | Log <sub>2</sub> Ratio | Log <sub>2</sub> Sum | q-Value  | p-Value  | FnPg | FnSg | FnPg       | FnSg     |                                                                  | -6                      | -4 | -2 | 0 | 2 | 4 | 6 |
| FN1591  | 0.041                  | 15.046               | 3.943e-1 | 8.498e-1 | 141  | 173  | 205.9440   | 225.1797 | AAL93706.1  RNFB-related protein                                 |                         |    |    |   |   |   |   |
|         |                        |                      |          |          | 147  | 148  | 156.7048   | 148.0000 |                                                                  |                         |    |    |   |   |   |   |
| FN1592  | -1.208                 | 6.378                |          |          |      |      |            |          | AAL93707.1  Na(+)-translocating NADH-quinone reductase subunit D |                         |    |    |   |   |   |   |
|         |                        |                      |          |          | 13   | 6    | 13.8583    | 6.0000   |                                                                  |                         |    |    |   |   |   |   |
| FN1594  | -0.252                 | 10.508               | 2.101e-1 | 3.36e-1  | 22   | 23   | 32.1331    | 29.9372  | AAL93709.1  Nitrogen fixation protein RNFG                       |                         |    |    |   |   |   |   |
|         |                        |                      |          |          | 48   | 40   | 51.1689    | 40.0000  |                                                                  |                         |    |    |   |   |   |   |
| FN1595  | -0.471                 | 14.033               | 2.854e-1 | 5.215e-1 | 35   | 76   | 51.1208    | 98.9229  | AAL93710.1  Na(+)-translocating NADH-quinone reductase subunit B |                         |    |    |   |   |   |   |
|         |                        |                      |          |          | 238  | 121  | 253.7126   | 121.0000 |                                                                  |                         |    |    |   |   |   |   |
| FN1596  | -0.833                 | 18.228               | 1.435e-1 | 1.721e-1 | 722  | 359  | 1054.5499  | 467.2803 | AAL93711.1  Nitrogen fixation iron-sulphur protein RNFC          |                         |    |    |   |   |   |   |
|         |                        |                      |          |          | 398  | 363  | 424.2757   | 363.0000 |                                                                  |                         |    |    |   |   |   |   |
| FN1597  |                        |                      |          |          | 20   |      | 29.2119    |          | AAL93712.1  Peptidyl-trRNA hydrolase                             |                         |    |    |   |   |   |   |
|         |                        |                      |          |          |      |      |            |          |                                                                  |                         |    |    |   |   |   |   |
| FN1600  | -0.796                 | 6.307                |          |          |      | 5    |            | 6.5081   | AAL93715.1  tRNA pseudouridine synthase A                        |                         |    |    |   |   |   |   |
|         |                        |                      |          |          | 11   | 7    | 11.7262    | 7.0000   |                                                                  |                         |    |    |   |   |   |   |
| FN1601  |                        |                      |          |          |      | 5    |            | 6.5081   | AAL93716.1  Hypothetical cytosolic protein                       |                         |    |    |   |   |   |   |
|         |                        |                      |          |          |      | 12   |            | 12.0000  |                                                                  |                         |    |    |   |   |   |   |
| FN1603  | -0.344                 | 4.749                |          |          | 4    | 4    | 5.8424     | 5.2065   | AAL93718.1  2',3'-cyclic nucleotide 3'-phosphodiesterase         |                         |    |    |   |   |   |   |
|         |                        |                      |          |          |      | 4    |            | 4.0000   |                                                                  |                         |    |    |   |   |   |   |
| FN1605  | -0.006                 | 16.615               | 4.282e-1 | 9.776e-1 | 169  | 240  | 246.8406   | 312.3880 | AAL93720.1  Adenylosuccinate synthetase                          |                         |    |    |   |   |   |   |
|         |                        |                      |          |          | 364  | 320  | 388.0310   | 320.0000 |                                                                  |                         |    |    |   |   |   |   |
| FN1606  | 0.749                  | 9.406                | 4.704e-2 | 2.022e-2 | 10   | 25   | 14.6060    | 32.5404  | AAL93721.1  3-deoxy-D-manno-octulosonic-acid transferase         |                         |    |    |   |   |   |   |
|         |                        |                      |          |          | 24   | 35   | 25.5845    | 35.0000  |                                                                  |                         |    |    |   |   |   |   |
| FN1607  | 0.062                  | 8.510                | 3.944e-1 | 8.503e-1 | 11   | 10   | 16.0666    | 13.0162  | AAL93722.1  Cytidylate kinase                                    |                         |    |    |   |   |   |   |
|         |                        |                      |          |          | 20   | 26   | 21.3204    | 26.0000  |                                                                  |                         |    |    |   |   |   |   |
| FN1608  | 0.087                  | 6.271                |          |          |      | 7    |            | 9.1113   | AAL93723.1  Ribosomal protein L11 methyltransferase              |                         |    |    |   |   |   |   |
|         |                        |                      |          |          | 8    | 9    | 8.5282     | 9.0000   |                                                                  |                         |    |    |   |   |   |   |
| FN1609  | -1.523                 | 5.832                |          |          |      | 3    |            | 3.9048   | AAL93724.1  Hypothetical protein                                 |                         |    |    |   |   |   |   |
|         |                        |                      |          |          | 12   | 5    | 12.7922    | 5.0000   |                                                                  |                         |    |    |   |   |   |   |
| FN1610  | -0.161                 | 10.547               | 3.236e-2 | 1.041e-2 | 29   | 27   | 42.3573    | 35.1436  | AAL93725.1  33 kDa chaperonin                                    |                         |    |    |   |   |   |   |
|         |                        |                      |          |          | 37   | 38   | 39.4427    | 38.0000  |                                                                  |                         |    |    |   |   |   |   |
| FN1613  | -0.112                 | 8.610                | 3.461e-1 | 6.909e-1 | 15   | 10   | 21.9089    | 13.0162  | AAL93728.1  Hypothetical protein                                 |                         |    |    |   |   |   |   |
|         |                        |                      |          |          | 18   | 25   | 19.1883    | 25.0000  |                                                                  |                         |    |    |   |   |   |   |

Show detected proteins only  
 Show all proteins  
 Filter by category:

Proteins found: 1313

Test Cutoff

| Signif | Direction | Applies To   |
|--------|-----------|--------------|
| yes    | +         | ratios, bars |
| no     | n/a       | bars         |
| yes    | -         | ratios, bars |
| yes    | +         | p-, q-Values |
| yes    | -         | p-, q-Values |

Fn Summary Table FnPg vs Fn FnSg vs Fn FnPgSg vs Fn FnPgSg vs FnPg FnSg vs FnPg FnPgSg vs FnSg Fn Coverage

| Protein | FnSg vs FnPg           |                      |          |          | Raw  |      |           |          | Normalized                                           |      |      |      | Description | Log <sub>2</sub> Ratios |    |    |   |   |   |   |
|---------|------------------------|----------------------|----------|----------|------|------|-----------|----------|------------------------------------------------------|------|------|------|-------------|-------------------------|----|----|---|---|---|---|
|         | Log <sub>2</sub> Ratio | Log <sub>2</sub> Sum | q-Value  | p-Value  | FnPg | FnSg | FnPg      | FnSg     | FnPg                                                 | FnSg | FnPg | FnSg |             |                         |    |    |   |   |   |   |
|         |                        |                      |          |          |      |      |           |          |                                                      |      |      |      |             | -6                      | -4 | -2 | 0 | 2 | 4 | 6 |
| FN1614  | -0.920                 | 8.975                | 2.841e-2 | 8.311e-3 | 24   | 12   | 35.0543   | 15.6194  | AAL93729.1  MG(2+) chelatase family protein          |      |      |      |             |                         |    |    |   |   |   |   |
|         |                        |                      |          |          | 25   | 17   | 26.6505   | 17.0000  |                                                      |      |      |      | ■           |                         |    |    |   |   |   |   |
| FN1616  | -0.507                 | 7.677                |          |          |      |      |           |          | AAL93731.1  N utilization substance protein B        |      |      |      |             |                         |    |    |   |   |   |   |
|         |                        |                      |          |          | 16   | 12   | 17.0563   | 12.0000  |                                                      |      |      |      | ■           |                         |    |    |   |   |   |   |
| FN1618  | 0.500                  | 10.996               | 1.242e-1 | 1.277e-1 | 17   | 38   | 24.8301   | 49.4614  | AAL93733.1  Hypothetical protein                     |      |      |      |             |                         |    |    |   |   |   |   |
|         |                        |                      |          |          | 48   | 58   | 51.1689   | 58.0000  |                                                      |      |      |      | ■           |                         |    |    |   |   |   |   |
| FN1619  | 0.010                  | 15.674               | 4.265e-1 | 9.71e-1  | 134  | 129  | 195.7198  | 167.9085 | AAL93734.1  Hypothetical cytosolic protein           |      |      |      |             |                         |    |    |   |   |   |   |
|         |                        |                      |          |          | 244  | 291  | 260.1087  | 291.0000 |                                                      |      |      |      |             |                         |    |    |   |   |   |   |
| FN1620  | -0.455                 | 17.483               | 1.904e-1 | 2.889e-1 | 468  | 296  | 683.5587  | 385.2785 | AAL93735.1  SSU ribosomal protein S2P                |      |      |      |             |                         |    |    |   |   |   |   |
|         |                        |                      |          |          | 299  | 346  | 318.7398  | 346.0000 |                                                      |      |      |      | ■           |                         |    |    |   |   |   |   |
| FN1621  | -0.957                 | 19.151               | 7.665e-2 | 4.943e-2 | 923  | 379  | 1348.1296 | 493.3127 | AAL93736.1  Protein Translation Elongation Factor Ts |      |      |      |             |                         |    |    |   |   |   |   |
|         |                        |                      |          |          | 730  | 602  | 778.1941  | 602.0000 |                                                      |      |      |      | ■           |                         |    |    |   |   |   |   |
| FN1622  | 0.105                  | 13.423               | 3.79e-1  | 7.969e-1 | 53   | 51   | 77.4116   | 66.3824  | AAL93737.1  Uridylate kinase                         |      |      |      |             |                         |    |    |   |   |   |   |
|         |                        |                      |          |          | 117  | 151  | 124.7243  | 151.0000 |                                                      |      |      |      |             |                         |    |    |   |   |   |   |
| FN1623  | -1.182                 | 9.427                | 2.799e-2 | 8.104e-3 | 22   | 16   | 32.1331   | 20.8259  | AAL93738.1  Ribosome Recycling Factor (RRF)          |      |      |      |             |                         |    |    |   |   |   |   |
|         |                        |                      |          |          | 44   | 14   | 46.9048   | 14.0000  |                                                      |      |      |      | ■           |                         |    |    |   |   |   |   |
| FN1624  | -0.304                 | 8.800                |          |          |      |      |           |          | AAL93739.1  Protein translocase subunit secY         |      |      |      |             |                         |    |    |   |   |   |   |
|         |                        |                      |          |          | 22   | 19   | 23.4524   | 19.0000  |                                                      |      |      |      | ■           |                         |    |    |   |   |   |   |
| FN1625  | -0.240                 | 12.596               | 3.144e-1 | 5.987e-1 | 85   | 59   | 124.1506  | 76.7954  | AAL93740.1  LSU ribosomal protein L15P               |      |      |      |             |                         |    |    |   |   |   |   |
|         |                        |                      |          |          | 44   | 68   | 46.9048   | 68.0000  |                                                      |      |      |      | ■           |                         |    |    |   |   |   |   |
| FN1626  | -0.940                 | 5.584                |          |          |      |      |           |          | AAL93741.1  LSU ribosomal protein L30P               |      |      |      |             |                         |    |    |   |   |   |   |
|         |                        |                      |          |          | 9    | 5    | 9.5942    | 5.0000   |                                                      |      |      |      | ■           |                         |    |    |   |   |   |   |
| FN1627  | -0.117                 | 16.142               | 1.286e-1 | 1.369e-1 | 193  | 184  | 281.8949  | 239.4974 | AAL93742.1  SSU ribosomal protein S5P                |      |      |      |             |                         |    |    |   |   |   |   |
|         |                        |                      |          |          | 261  | 277  | 278.2310  | 277.0000 |                                                      |      |      |      | ■           |                         |    |    |   |   |   |   |
| FN1628  | -4.097                 | 12.028               |          |          | 183  | 12   | 267.2890  | 15.6194  | AAL93743.1  LSU ribosomal protein L18P               |      |      |      |             |                         |    |    |   |   |   |   |
|         |                        |                      |          |          |      |      |           |          |                                                      |      |      |      | ■           |                         |    |    |   |   |   |   |
| FN1629  | -0.844                 | 16.119               | 1.659e-1 | 2.283e-1 | 369  | 167  | 538.9597  | 217.3700 | AAL93744.1  LSU ribosomal protein L6P                |      |      |      |             |                         |    |    |   |   |   |   |
|         |                        |                      |          |          | 165  | 181  | 175.8932  | 181.0000 |                                                      |      |      |      | ■           |                         |    |    |   |   |   |   |
| FN1630  | -0.217                 | 12.465               | 6.395e-2 | 3.507e-2 | 57   | 58   | 83.2539   | 75.4938  | AAL93745.1  SSU ribosomal protein S8P                |      |      |      |             |                         |    |    |   |   |   |   |
|         |                        |                      |          |          | 74   | 64   | 78.8854   | 64.0000  |                                                      |      |      |      | ■           |                         |    |    |   |   |   |   |
| FN1631  | -0.449                 | 4.379                |          |          |      | 3    |           | 3.9048   | AAL93746.1  SSU ribosomal protein S14P               |      |      |      |             |                         |    |    |   |   |   |   |
|         |                        |                      |          |          | 5    |      | 5.3301    |          |                                                      |      |      |      | ■           |                         |    |    |   |   |   |   |

Show detected proteins only  
 Show all proteins  
 Filter by category:

Proteins found: 1313

Test Cutoff

| Signif | Direction | Applies To |
|--------|-----------|------------|
| ■      | yes       | +          |
| ■      | no        | n/a        |
| ■      | yes       | -          |
| ■      | yes       | +          |
| ■      | yes       | -          |

Applies To: ratios, bars; ratios, bars; p-, q-Values



Fn Summary Table FnPg vs Fn FnSg vs Fn FnPgSg vs Fn FnPgSg vs FnPg FnSg vs FnPg FnPgSg vs FnSg Fn Coverage

| Protein | FnSg vs FnPg           |                      |          |          | Raw  |      | Normalized |          | Description                                   | Log <sub>2</sub> Ratios |  |    |    |    |   |   |   |
|---------|------------------------|----------------------|----------|----------|------|------|------------|----------|-----------------------------------------------|-------------------------|--|----|----|----|---|---|---|
|         | Log <sub>2</sub> Ratio | Log <sub>2</sub> Sum | q-Value  | p-Value  | FnPg | FnSg | FnPg       | FnSg     |                                               |                         |  |    |    |    |   |   |   |
|         |                        |                      |          |          |      |      |            |          |                                               |                         |  | -6 | -4 | -2 | 0 | 2 | 4 |
| FN1632  | 0.107                  | 15.729               | 2.263e-1 | 3.754e-1 | 152  | 208  | 222.0105   | 270.7362 | AAL93747.1  LSU ribosomal protein L5P         |                         |  |    |    |    |   |   |   |
|         |                        |                      |          |          | 213  | 213  | 227.0621   | 213.0000 |                                               |                         |  |    |    |    |   |   |   |
| FN1634  | -2.020                 | 10.182               |          |          | 47   | 13   | 68.6480    | 16.9210  | AAL93749.1  LSU ribosomal protein L24P        |                         |  |    |    |    |   |   |   |
|         |                        |                      |          |          |      |      |            |          |                                               |                         |  |    |    |    |   |   |   |
| FN1635  | -0.675                 | 7.774                | 3.498e-2 | 1.201e-2 | 11   | 8    | 16.0666    | 10.4129  | AAL93750.1  LSU ribosomal protein L14P        |                         |  |    |    |    |   |   |   |
|         |                        |                      |          |          | 20   | 13   | 21.3204    | 13.0000  |                                               |                         |  |    |    |    |   |   |   |
| FN1636  | 1.554                  | 10.981               | 3.977e-2 | 1.49e-2  | 6    | 60   | 8.7636     | 78.0970  | AAL93751.1  SSU ribosomal protein S17P        |                         |  |    |    |    |   |   |   |
|         |                        |                      |          |          | 41   | 76   | 43.7068    | 76.0000  |                                               |                         |  |    |    |    |   |   |   |
| FN1638  | -1.226                 | 11.299               | 9.84e-2  | 8.267e-2 | 73   | 22   | 106.6235   | 28.6356  | AAL93753.1  LSU ribosomal protein L16P        |                         |  |    |    |    |   |   |   |
|         |                        |                      |          |          | 44   | 37   | 46.9048    | 37.0000  |                                               |                         |  |    |    |    |   |   |   |
| FN1639  | -0.471                 | 18.371               | 1.656e-1 | 2.276e-1 | 619  | 355  | 904.1086   | 462.0739 | AAL93754.1  SSU ribosomal protein S3P         |                         |  |    |    |    |   |   |   |
|         |                        |                      |          |          | 438  | 527  | 466.9164   | 527.0000 |                                               |                         |  |    |    |    |   |   |   |
| FN1640  | -1.408                 | 11.980               | 8.823e-2 | 6.657e-2 | 98   | 30   | 143.1384   | 39.0485  | AAL93755.1  LSU ribosomal protein L22P        |                         |  |    |    |    |   |   |   |
|         |                        |                      |          |          | 60   | 39   | 63.9612    | 39.0000  |                                               |                         |  |    |    |    |   |   |   |
| FN1641  | -2.874                 | 11.348               | 9.194e-2 | 7.279e-2 | 147  | 9    | 214.7075   | 11.7145  | AAL93756.1  SSU ribosomal protein S19P        |                         |  |    |    |    |   |   |   |
|         |                        |                      |          |          | 58   | 26   | 61.8291    | 26.0000  |                                               |                         |  |    |    |    |   |   |   |
| FN1642  | -0.375                 | 15.662               | 3.009e-1 | 5.621e-1 | 285  | 175  | 416.2697   | 227.7829 | AAL93757.1  LSU ribosomal protein L2P         |                         |  |    |    |    |   |   |   |
|         |                        |                      |          |          | 96   | 172  | 102.3379   | 172.0000 |                                               |                         |  |    |    |    |   |   |   |
| FN1643  | -1.746                 | 12.047               | 1.294e-1 | 1.385e-1 | 131  | 30   | 191.3380   | 39.0485  | AAL93758.1  LSU ribosomal protein L23P        |                         |  |    |    |    |   |   |   |
|         |                        |                      |          |          | 44   | 32   | 46.9048    | 32.0000  |                                               |                         |  |    |    |    |   |   |   |
| FN1644  | 0.352                  | 19.284               | 1.219e-1 | 1.231e-1 | 594  | 721  | 867.5937   | 938.4655 | AAL93759.1  LSU ribosomal protein L1E         |                         |  |    |    |    |   |   |   |
|         |                        |                      |          |          | 513  | 867  | 546.8679   | 867.0000 |                                               |                         |  |    |    |    |   |   |   |
| FN1645  | -1.309                 | 14.463               | 1.333e-1 | 1.471e-1 | 248  | 76   | 362.2277   | 98.9229  | AAL93760.1  LSU ribosomal protein L3P         |                         |  |    |    |    |   |   |   |
|         |                        |                      |          |          | 104  | 92   | 110.8660   | 92.0000  |                                               |                         |  |    |    |    |   |   |   |
| FN1646  | -0.808                 | 14.268               | 1.432e-1 | 1.714e-1 | 180  | 84   | 262.9072   | 109.3358 | AAL93761.1  SSU ribosomal protein S10P        |                         |  |    |    |    |   |   |   |
|         |                        |                      |          |          | 102  | 103  | 108.7340   | 103.0000 |                                               |                         |  |    |    |    |   |   |   |
| FN1647  | -1.585                 | 15.347               | 1.509e-1 | 1.925e-1 | 409  | 82   | 597.3836   | 106.7326 | AAL93762.1  Hypothetical protein              |                         |  |    |    |    |   |   |   |
|         |                        |                      |          |          | 103  | 129  | 109.8000   | 129.0000 |                                               |                         |  |    |    |    |   |   |   |
| FN1652  | 0.383                  | 11.998               | 3.084e-2 | 9.571e-3 | 38   | 60   | 55.5026    | 78.0970  | AAL93767.1  Oligopeptide-binding protein oppA |                         |  |    |    |    |   |   |   |
|         |                        |                      |          |          | 53   | 68   | 56.4990    | 68.0000  |                                               |                         |  |    |    |    |   |   |   |
| FN1654  | 1.045                  | 12.905               | 6.716e-2 | 3.832e-2 | 20   | 98   | 29.2119    | 127.5584 | AAL93769.1  Hypothetical protein              |                         |  |    |    |    |   |   |   |
|         |                        |                      |          |          | 87   | 124  | 92.7437    | 124.0000 |                                               |                         |  |    |    |    |   |   |   |

Show detected proteins only  
 Show all proteins  
 Filter by category:

Proteins found: 1313

Test Cutoff

| Signif | Direction | Applies To   |
|--------|-----------|--------------|
| yes    | +         | ratios, bars |
| no     | n/a       | bars         |
| yes    | -         | ratios, bars |
| yes    | +         | p-, q-Values |
| yes    | -         |              |

Fn Summary Table FnPg vs Fn FnSg vs Fn FnPgSg vs Fn FnPgSg vs FnPg FnSg vs FnPg FnPgSg vs FnSg Fn Coverage

| Protein | FnSg vs FnPg           |                      |          |          | Raw  |      | Normalized |          | Description                                                      | Log <sub>2</sub> Ratios |    |    |    |   |   |   |
|---------|------------------------|----------------------|----------|----------|------|------|------------|----------|------------------------------------------------------------------|-------------------------|----|----|----|---|---|---|
|         | Log <sub>2</sub> Ratio | Log <sub>2</sub> Sum | q-Value  | p-Value  | FnPg | FnSg | FnPg       | FnSg     |                                                                  |                         |    |    |    |   |   |   |
|         |                        |                      |          |          |      |      |            |          |                                                                  |                         | -6 | -4 | -2 | 0 | 2 | 4 |
| FN1655  | 1.019                  | 14.012               | 8.593e-2 | 6.28e-2  | 82   | 96   | 119.7688   | 124.9552 | AAL93770.1   Hypothetical cytosolic protein                      |                         |    |    |    |   |   |   |
|         |                        |                      |          |          | 57   | 241  | 60.7631    | 241.0000 |                                                                  |                         |    |    |    |   |   |   |
| FN1657  | -1.150                 | 12.696               | 1.914e-1 | 2.915e-1 | 145  | 41   | 211.7863   | 53.3663  | AAL93772.1   SSU ribosomal protein S6P                           |                         |    |    |    |   |   |   |
|         |                        |                      |          |          | 29   | 56   | 30.9146    | 56.0000  |                                                                  |                         |    |    |    |   |   |   |
| FN1658  | 0.548                  | 13.374               | 1.277e-2 | 2.44e-3  | 59   | 90   | 86.1751    | 117.1455 | AAL93773.1   Prolyl-tRNA synthetase                              |                         |    |    |    |   |   |   |
|         |                        |                      |          |          | 79   | 132  | 84.2155    | 132.0000 |                                                                  |                         |    |    |    |   |   |   |
| FN1660  |                        |                      |          |          |      |      |            |          | AAL93775.1   ATP-dependent DNA helicase recG                     |                         |    |    |    |   |   |   |
|         |                        |                      |          |          |      | 5    |            | 5.0000   |                                                                  |                         |    |    |    |   |   |   |
| FN1661  | -0.723                 | 9.557                | 1.101e-2 | 1.97e-3  | 22   | 19   | 32.1331    | 24.7307  | AAL93776.1   Hypothetical cytosolic protein                      |                         |    |    |    |   |   |   |
|         |                        |                      |          |          | 36   | 18   | 38.3767    | 18.0000  |                                                                  |                         |    |    |    |   |   |   |
| FN1662  | 0.783                  | 10.104               | 4.415e-2 | 1.8e-2   | 12   | 30   | 17.5271    | 39.0485  | AAL93777.1   Hypothetical protein                                |                         |    |    |    |   |   |   |
|         |                        |                      |          |          | 31   | 48   | 33.0466    | 48.0000  |                                                                  |                         |    |    |    |   |   |   |
| FN1663  | 0.096                  | 6.620                |          |          |      | 5    |            | 6.5081   | AAL93778.1   Hypothetical protein                                |                         |    |    |    |   |   |   |
|         |                        |                      |          |          | 9    | 14   | 9.5942     | 14.0000  |                                                                  |                         |    |    |    |   |   |   |
| FN1667  | -0.547                 | 3.716                |          |          | 3    |      | 4.3818     |          | AAL93782.1   dTDP-glucose 4,6-dehydratase                        |                         |    |    |    |   |   |   |
|         |                        |                      |          |          |      | 3    |            | 3.0000   |                                                                  |                         |    |    |    |   |   |   |
| FN1668  | -0.829                 | 3.999                |          |          |      |      |            |          | AAL93783.1   Cholinephosphate cytidyltransferase                 |                         |    |    |    |   |   |   |
|         |                        |                      |          |          | 5    | 3    | 5.3301     | 3.0000   |                                                                  |                         |    |    |    |   |   |   |
| FN1670  | -0.004                 | 10.019               | 4.282e-1 | 9.776e-1 | 23   | 21   | 33.5937    | 27.3339  | AAL93785.1   Choline kinase                                      |                         |    |    |    |   |   |   |
|         |                        |                      |          |          | 29   | 37   | 30.9146    | 37.0000  |                                                                  |                         |    |    |    |   |   |   |
| FN1676  |                        |                      |          |          |      |      |            |          | AAL93791.1   Transposase                                         |                         |    |    |    |   |   |   |
|         |                        |                      |          |          |      | 3    |            | 3.0000   |                                                                  |                         |    |    |    |   |   |   |
| FN1679  | 0.299                  | 18.089               | 1.499e-1 | 1.9e-1   | 249  | 423  | 363.6883   | 550.5838 | AAL93794.1   LPS biosynthesis protein WbpG                       |                         |    |    |    |   |   |   |
|         |                        |                      |          |          | 552  | 621  | 588.4426   | 621.0000 |                                                                  |                         |    |    |    |   |   |   |
| FN1683  | 0.552                  | 10.547               | 8.934e-2 | 6.837e-2 | 16   | 42   | 23.3695    | 54.6679  | AAL93798.1   Acetyltransferase                                   |                         |    |    |    |   |   |   |
|         |                        |                      |          |          | 38   | 39   | 40.5087    | 39.0000  |                                                                  |                         |    |    |    |   |   |   |
| FN1684  | -0.793                 | 16.631               | 7.831e-2 | 5.166e-2 | 358  | 146  | 522.8932   | 190.0360 | AAL93799.1   N-acetylneuraminatase synthase                      |                         |    |    |    |   |   |   |
|         |                        |                      |          |          | 296  | 294  | 315.5417   | 294.0000 |                                                                  |                         |    |    |    |   |   |   |
| FN1685  | -0.455                 | 11.975               | 2.275e-1 | 3.784e-1 | 74   | 41   | 108.0841   | 53.3663  | AAL93800.1   dTDP-4-dehydrorhamnose reductase                    |                         |    |    |    |   |   |   |
|         |                        |                      |          |          | 38   | 55   | 40.5087    | 55.0000  |                                                                  |                         |    |    |    |   |   |   |
| FN1686  | -0.213                 | 16.055               | 3.157e-1 | 6.022e-1 | 270  | 168  | 394.3608   | 218.6716 | AAL93801.1   Spore coat polysaccharide biosynthesis protein spsF |                         |    |    |    |   |   |   |
|         |                        |                      |          |          | 157  | 266  | 167.3650   | 266.0000 |                                                                  |                         |    |    |    |   |   |   |

Show detected proteins only  
 Show all proteins  
 Filter by category:

Proteins found: 1313

Test Cutoff

| Signif | Direction | Applies To   |
|--------|-----------|--------------|
| yes    | +         | ratios, bars |
| no     | n/a       | bars         |
| yes    | -         | ratios, bars |
| yes    | +         | p-, q-Values |
| yes    | -         |              |

Fn Summary Table FnPg vs Fn FnSg vs Fn FnPgSg vs Fn FnPgSg vs FnPg FnSg vs FnPg FnPgSg vs FnSg Fn Coverage

| Protein | FnSg vs FnPg           |                      |          |          | Raw  |      |          |          | Normalized                                            |      |      |      | Description | Log <sub>2</sub> Ratios |    |    |   |   |   |   |
|---------|------------------------|----------------------|----------|----------|------|------|----------|----------|-------------------------------------------------------|------|------|------|-------------|-------------------------|----|----|---|---|---|---|
|         | Log <sub>2</sub> Ratio | Log <sub>2</sub> Sum | q-Value  | p-Value  | FnPg | FnSg | FnPg     | FnSg     | FnPg                                                  | FnSg | FnPg | FnSg |             |                         |    |    |   |   |   |   |
|         |                        |                      |          |          |      |      |          |          |                                                       |      |      |      |             | -6                      | -4 | -2 | 0 | 2 | 4 | 6 |
| FN1687  | -0.183                 | 15.256               | 1.884e-1 | 2.837e-1 | 147  | 117  | 214.7075 | 152.2891 | AAL93802.1  Gluconate 5-dehydrogenase                 |      |      |      |             |                         |    |    |   |   |   |   |
|         |                        |                      |          |          | 194  | 219  | 206.8077 | 219.0000 |                                                       |      |      |      |             |                         |    |    |   |   |   |   |
| FN1688  | -1.666                 | 12.786               | 1.371e-1 | 1.559e-1 | 167  | 31   | 243.9194 | 40.3501  | AAL93803.1  Oxidoreductase                            |      |      |      |             |                         |    |    |   |   |   |   |
|         |                        |                      |          |          | 52   | 54   | 55.4330  | 54.0000  |                                                       |      |      |      |             |                         |    |    |   |   |   |   |
| FN1689  | -0.291                 | 16.414               | 5.993e-2 | 3.134e-2 | 241  | 226  | 352.0035 | 294.1653 | AAL93804.1  UDP-N-acetylglucosamine 4,6-dehydratase   |      |      |      |             |                         |    |    |   |   |   |   |
|         |                        |                      |          |          | 283  | 240  | 301.6835 | 240.0000 |                                                       |      |      |      |             |                         |    |    |   |   |   |   |
| FN1690  | -0.231                 | 11.021               | 2.826e-1 | 5.143e-1 | 45   | 27   | 65.7268  | 35.1436  | AAL93805.1  Hypothetical protein                      |      |      |      |             |                         |    |    |   |   |   |   |
|         |                        |                      |          |          | 31   | 49   | 33.0466  | 49.0000  |                                                       |      |      |      |             |                         |    |    |   |   |   |   |
| FN1692  | 0.605                  | 10.687               | 1.438e-3 | 6.615e-5 | 21   | 37   | 30.6725  | 48.1598  | AAL93807.1  Glycosyl transferase                      |      |      |      |             |                         |    |    |   |   |   |   |
|         |                        |                      |          |          | 33   | 52   | 35.1786  | 52.0000  |                                                       |      |      |      |             |                         |    |    |   |   |   |   |
| FN1693  | -0.547                 | 7.634                | 1.491e-1 | 1.877e-1 | 8    | 11   | 11.6848  | 14.3178  | AAL93808.1  Hypothetical protein                      |      |      |      |             |                         |    |    |   |   |   |   |
|         |                        |                      |          |          | 21   | 9    | 22.3864  | 9.0000   |                                                       |      |      |      |             |                         |    |    |   |   |   |   |
| FN1694  | -0.437                 | 11.220               | 1.945e-1 | 3.001e-1 | 53   | 33   | 77.4116  | 42.9533  | AAL93809.1  UDP-N-acetyl-D-quinovosamine 4-epimerase  |      |      |      |             |                         |    |    |   |   |   |   |
|         |                        |                      |          |          | 34   | 41   | 36.2447  | 41.0000  |                                                       |      |      |      |             |                         |    |    |   |   |   |   |
| FN1695  | 0.507                  | 8.117                | 1.551e-1 | 2.027e-1 | 6    | 19   | 8.7636   | 24.7307  | AAL93810.1  Probable quinovosaminephosphotransferase  |      |      |      |             |                         |    |    |   |   |   |   |
|         |                        |                      |          |          | 18   | 15   | 19.1883  | 15.0000  |                                                       |      |      |      |             |                         |    |    |   |   |   |   |
| FN1696  | 0.407                  | 15.275               | 9.183e-2 | 7.259e-2 | 93   | 161  | 135.8354 | 209.5603 | AAL93811.1  UDP-N-acetylglucosamine 4,6-dehydratase   |      |      |      |             |                         |    |    |   |   |   |   |
|         |                        |                      |          |          | 197  | 249  | 210.0058 | 249.0000 |                                                       |      |      |      |             |                         |    |    |   |   |   |   |
| FN1697  | 0.276                  | 13.528               | 2.76e-1  | 4.976e-1 | 36   | 100  | 52.5814  | 130.1617 | AAL93812.1  Hypothetical protein                      |      |      |      |             |                         |    |    |   |   |   |   |
|         |                        |                      |          |          | 136  | 109  | 144.9786 | 109.0000 |                                                       |      |      |      |             |                         |    |    |   |   |   |   |
| FN1698  | 0.576                  | 15.233               | 8.787e-2 | 6.597e-2 | 77   | 183  | 112.4659 | 238.1958 | AAL93813.1  dTDP-4-dehydrorhamnose reductase          |      |      |      |             |                         |    |    |   |   |   |   |
|         |                        |                      |          |          | 196  | 241  | 208.9398 | 241.0000 |                                                       |      |      |      |             |                         |    |    |   |   |   |   |
| FN1700  |                        |                      |          |          |      |      |          | 3.9048   | AAL93815.1  Hypothetical protein                      |      |      |      |             |                         |    |    |   |   |   |   |
|         |                        |                      |          |          |      |      |          |          |                                                       |      |      |      |             |                         |    |    |   |   |   |   |
| FN1701  | 0.680                  | 11.303               | 1.601e-2 | 3.37e-3  | 23   | 44   | 33.5937  | 57.2711  | AAL93816.1  ABC transporter ATP-binding protein       |      |      |      |             |                         |    |    |   |   |   |   |
|         |                        |                      |          |          | 43   | 70   | 45.8388  | 70.0000  |                                                       |      |      |      |             |                         |    |    |   |   |   |   |
| FN1703  | 0.128                  | 14.669               | 3.682e-1 | 7.608e-1 | 56   | 144  | 81.7933  | 187.4328 | AAL93818.1  ADP-L-glycero-D-mannoheptose-6-epimerase  |      |      |      |             |                         |    |    |   |   |   |   |
|         |                        |                      |          |          | 213  | 150  | 227.0621 | 150.0000 |                                                       |      |      |      |             |                         |    |    |   |   |   |   |
| FN1704  | 0.401                  | 7.002                | 1.814e-1 | 2.657e-1 | 4    | 10   | 5.8424   | 13.0162  | AAL93819.1  Serine protease                           |      |      |      |             |                         |    |    |   |   |   |   |
|         |                        |                      |          |          | 13   | 13   | 13.8583  | 13.0000  |                                                       |      |      |      |             |                         |    |    |   |   |   |   |
| FN1708  | 0.212                  | 17.821               | 1.129e-2 | 2.045e-3 | 294  | 406  | 429.4151 | 528.4563 | AAL93823.1  Polyribonucleotide nucleotidyltransferase |      |      |      |             |                         |    |    |   |   |   |   |
|         |                        |                      |          |          | 436  | 507  | 464.7844 | 507.0000 |                                                       |      |      |      |             |                         |    |    |   |   |   |   |

Show detected proteins only  
 Show all proteins  
 Filter by category:

Proteins found: 1313

Test Cutoff

| Signif | Direction | Applies To   |
|--------|-----------|--------------|
| yes    | +         | ratios, bars |
| no     | n/a       | bars         |
| yes    | -         | ratios, bars |
| yes    | +         | p-, q-Values |
| yes    | -         |              |



Fn Summary Table FnPg vs Fn FnSg vs Fn FnPgSg vs Fn FnPgSg vs FnPg FnSg vs FnPg FnPgSg vs FnSg Fn Coverage

| Protein | FnSg vs FnPg           |                      |          |          | Raw  |      | Normalized |           | Description                                          | Log <sub>2</sub> Ratios |    |    |   |   |   |   |
|---------|------------------------|----------------------|----------|----------|------|------|------------|-----------|------------------------------------------------------|-------------------------|----|----|---|---|---|---|
|         | Log <sub>2</sub> Ratio | Log <sub>2</sub> Sum | q-Value  | p-Value  | FnPg | FnSg | FnPg       | FnSg      |                                                      | -6                      | -4 | -2 | 0 | 2 | 4 | 6 |
| FN1735  | 0.965                  | 14.678               | 5.033e-2 | 2.297e-2 | 47   | 184  | 68.6480    | 239.4974  | AAL93850.1  V-type sodium ATP synthase subunit A     |                         |    |    |   |   |   |   |
|         |                        |                      |          |          | 153  | 213  | 163.1009   | 213.0000  |                                                      |                         |    |    |   |   |   |   |
| FN1736  | 0.829                  | 10.854               | 4.839e-2 | 2.131e-2 | 15   | 42   | 21.9089    | 54.6679   | AAL93851.1  V-type sodium ATP synthase subunit A     |                         |    |    |   |   |   |   |
|         |                        |                      |          |          | 40   | 60   | 42.6408    | 60.0000   |                                                      |                         |    |    |   |   |   |   |
| FN1737  | 1.553                  | 6.413                | 3.046e-3 | 2.633e-4 | 3    | 12   | 4.3818     | 15.6194   | AAL93852.1  V-type sodium ATP synthase subunit G     |                         |    |    |   |   |   |   |
|         |                        |                      |          |          | 6    | 16   | 6.3961     | 16.0000   |                                                      |                         |    |    |   |   |   |   |
| FN1738  | -0.128                 | 13.021               | 3.688e-1 | 7.629e-1 | 94   | 61   | 137.2960   | 79.3986   | AAL93853.1  V-type sodium ATP synthase subunit C     |                         |    |    |   |   |   |   |
|         |                        |                      |          |          | 50   | 95   | 53.3010    | 95.0000   |                                                      |                         |    |    |   |   |   |   |
| FN1739  | -0.410                 | 5.814                |          |          | 6    | 5    | 8.7636     | 6.5081    | AAL93854.1  V-type sodium ATP synthase subunit E     |                         |    |    |   |   |   |   |
|         |                        |                      |          |          | 8    |      | 8.5282     |           |                                                      |                         |    |    |   |   |   |   |
| FN1740  | -0.791                 | 14.457               |          |          |      |      |            |           | AAL93855.1  V-type sodium ATP synthase subunit K     |                         |    |    |   |   |   |   |
|         |                        |                      |          |          | 185  | 114  | 197.2136   | 114.0000  |                                                      |                         |    |    |   |   |   |   |
| FN1741  | 0.162                  | 10.274               | 1.494e-1 | 1.884e-1 | 20   | 28   | 29.2119    | 36.4453   | AAL93856.1  V-type sodium ATP synthase subunit I     |                         |    |    |   |   |   |   |
|         |                        |                      |          |          | 35   | 38   | 37.3107    | 38.0000   |                                                      |                         |    |    |   |   |   |   |
| FN1742  |                        |                      |          |          | 9    |      | 13.1454    |           | AAL93857.1  V-type sodium ATP synthase subunit G     |                         |    |    |   |   |   |   |
|         |                        |                      |          |          | 8    |      | 8.5282     |           |                                                      |                         |    |    |   |   |   |   |
| FN1743  |                        |                      |          |          |      |      |            |           | AAL93858.1  Multidrug-efflux transporter 2 regulator |                         |    |    |   |   |   |   |
|         |                        |                      |          |          | 8    |      | 8.5282     |           |                                                      |                         |    |    |   |   |   |   |
| FN1745  | -0.070                 | 9.284                |          |          |      | 19   |            | 24.7307   | AAL93860.1  Cystathionine gamma-synthase             |                         |    |    |   |   |   |   |
|         |                        |                      |          |          | 24   | 24   | 25.5845    | 24.0000   |                                                      |                         |    |    |   |   |   |   |
| FN1746  | 0.768                  | 6.567                |          |          |      | 8    |            | 10.4129   | AAL93861.1  Cystathionine beta-lyase                 |                         |    |    |   |   |   |   |
|         |                        |                      |          |          | 7    | 15   | 7.4621     | 15.0000   |                                                      |                         |    |    |   |   |   |   |
| FN1754  |                        |                      |          |          | 11   |      | 16.0666    |           | AAL93869.1  Thiazole biosynthesis protein thiG       |                         |    |    |   |   |   |   |
|         |                        |                      |          |          |      |      |            |           |                                                      |                         |    |    |   |   |   |   |
| FN1762  |                        |                      |          |          |      | 4    |            | 5.2065    | AAL93875.1  Protein yaaA                             |                         |    |    |   |   |   |   |
|         |                        |                      |          |          |      |      |            |           |                                                      |                         |    |    |   |   |   |   |
| FN1763  | 0.049                  | 12.201               | 3.905e-1 | 8.363e-1 | 34   | 55   | 49.6602    | 71.5889   | AAL93876.1  Hypothetical cytosolic protein           |                         |    |    |   |   |   |   |
|         |                        |                      |          |          | 80   | 68   | 85.2815    | 68.0000   |                                                      |                         |    |    |   |   |   |   |
| FN1764  | 0.776                  | 24.995               | 1.441e-1 | 1.735e-1 | 926  | 5881 | 1352.5114  | 7654.8070 | AAL93877.1  Enolase                                  |                         |    |    |   |   |   |   |
|         |                        |                      |          |          | 7022 | 7477 | 7485.5874  | 7477.0000 |                                                      |                         |    |    |   |   |   |   |
| FN1765  | 0.370                  | 18.426               | 2.014e-1 | 3.161e-1 | 207  | 535  | 302.3433   | 696.3649  | AAL93878.1  Pyruvate kinase                          |                         |    |    |   |   |   |   |
|         |                        |                      |          |          | 696  | 653  | 741.9494   | 653.0000  |                                                      |                         |    |    |   |   |   |   |

Show detected proteins only  
 Show all proteins  
 Filter by category:

Proteins found: 1313

Test Cutoff

| Signif | Direction | Applies To   |
|--------|-----------|--------------|
| yes    | +         | ratios, bars |
| no     | n/a       | bars         |
| yes    | -         | ratios, bars |
| yes    | +         | p-, q-Values |
| yes    | -         | p-, q-Values |

Fn Summary Table FnPg vs Fn FnSg vs Fn FnPgSg vs Fn FnPgSg vs FnPg FnSg vs FnPg FnPgSg vs FnSg Fn Coverage

| Protein | FnSg vs FnPg           |                      |          |          | Raw  |      | Normalized |           | Description                                                          | Log <sub>2</sub> Ratios |    |    |   |   |   |   |
|---------|------------------------|----------------------|----------|----------|------|------|------------|-----------|----------------------------------------------------------------------|-------------------------|----|----|---|---|---|---|
|         | Log <sub>2</sub> Ratio | Log <sub>2</sub> Sum | q-Value  | p-Value  | FnPg | FnSg | FnPg       | FnSg      |                                                                      |                         |    |    |   |   |   |   |
|         |                        |                      |          |          |      |      |            |           |                                                                      | -6                      | -4 | -2 | 0 | 2 | 4 | 6 |
| FN1780  | 0.065                  | 7.520                | 4.014e-1 | 8.754e-1 | 5    | 9    | 7.3030     | 11.7145   | AAL93879.1  Hypothetical protein                                     |                         |    |    |   |   |   |   |
|         |                        |                      |          |          | 18   | 16   | 19.1883    | 16.0000   |                                                                      |                         |    |    |   |   |   |   |
| FN1781  | 0.027                  | 18.062               | 4.073e-1 | 8.973e-1 | 433  | 374  | 632.4378   | 486.8046  | AAL93880.1  LytB protein                                             |                         |    |    |   |   |   |   |
|         |                        |                      |          |          | 379  | 569  | 404.0213   | 569.0000  |                                                                      |                         |    |    |   |   |   |   |
| FN1783  | -0.552                 | 6.552                |          |          | 11   | 8    | 11.7262    | 8.0000    | AAL93882.1  Ethanolamine utilization protein eutJ                    |                         |    |    |   |   |   |   |
|         |                        |                      |          |          |      |      |            |           |                                                                      |                         |    |    |   |   |   |   |
| FN1784  | 1.075                  | 7.903                |          |          |      | 13   |            | 16.9210   | AAL93883.1  unknown                                                  |                         |    |    |   |   |   |   |
|         |                        |                      |          |          | 10   | 28   | 10.6602    | 28.0000   |                                                                      |                         |    |    |   |   |   |   |
| FN1785  | 0.047                  | 7.632                |          |          |      | 11   |            | 14.3178   | AAL93884.1  Hypothetical protein                                     |                         |    |    |   |   |   |   |
|         |                        |                      |          |          | 13   |      | 13.8583    |           |                                                                      |                         |    |    |   |   |   |   |
| FN1786  | 0.740                  | 10.174               | 1.092e-1 | 1.002e-1 | 9    | 36   | 13.1454    | 46.8582   | AAL93885.1  ADP-heptose synthase                                     |                         |    |    |   |   |   |   |
|         |                        |                      |          |          | 37   | 41   | 39.4427    | 41.0000   |                                                                      |                         |    |    |   |   |   |   |
| FN1787  | -0.226                 | 8.040                |          |          | 16   |      | 23.3695    |           | AAL93886.1  Tetratricopeptide repeat family protein                  |                         |    |    |   |   |   |   |
|         |                        |                      |          |          | 11   | 15   | 11.7262    | 15.0000   |                                                                      |                         |    |    |   |   |   |   |
| FN1788  | -0.594                 | 8.846                | 1.461e-1 | 1.792e-1 | 12   | 13   | 17.5271    | 16.9210   | AAL93887.1  2C-methyl-D-erythritol 2,4-cyclodiphosphate synthase     |                         |    |    |   |   |   |   |
|         |                        |                      |          |          | 33   | 18   | 35.1786    | 18.0000   |                                                                      |                         |    |    |   |   |   |   |
| FN1790  | 0.381                  | 10.817               | 3.163e-1 | 6.041e-1 | 5    | 23   | 7.3030     | 29.9372   | AAL93889.1  Cob(I)alamin adenosyltransferase                         |                         |    |    |   |   |   |   |
|         |                        |                      |          |          | 63   | 67   | 67.1592    | 67.0000   |                                                                      |                         |    |    |   |   |   |   |
| FN1791  |                        |                      |          |          |      | 3    |            | 3.9048    | AAL93890.1  Mutator MutT protein                                     |                         |    |    |   |   |   |   |
|         |                        |                      |          |          |      | 5    |            | 5.0000    |                                                                      |                         |    |    |   |   |   |   |
| FN1792  | -0.988                 | 22.914               | 1.031e-1 | 8.992e-2 | 3669 | 1257 | 5358.9249  | 1636.1320 | AAL93891.1  Hypothetical protein                                     |                         |    |    |   |   |   |   |
|         |                        |                      |          |          | 2401 | 2356 | 2559.5123  | 2356.0000 |                                                                      |                         |    |    |   |   |   |   |
| FN1793  | 0.279                  | 15.633               | 3.318e-1 | 6.484e-1 | 38   | 201  | 55.5026    | 261.6249  | AAL93892.1  Phosphoenolpyruvate-protein phosphotransferase           |                         |    |    |   |   |   |   |
|         |                        |                      |          |          | 332  | 235  | 353.9184   | 235.0000  |                                                                      |                         |    |    |   |   |   |   |
| FN1794  | 0.097                  | 10.952               | 3.806e-1 | 8.022e-1 | 29   | 50   | 42.3573    | 65.0808   | AAL93893.1  Phosphocarrier protein HPr                               |                         |    |    |   |   |   |   |
|         |                        |                      |          |          | 41   | 27   | 43.7068    | 27.0000   |                                                                      |                         |    |    |   |   |   |   |
| FN1795  |                        |                      |          |          |      | 12   |            | 12.0000   | AAL93894.1  Hypothetical protein                                     |                         |    |    |   |   |   |   |
|         |                        |                      |          |          |      |      |            |           |                                                                      |                         |    |    |   |   |   |   |
| FN1796  |                        |                      |          |          |      | 8    |            | 8.0000    | AAL93895.1  unknown                                                  |                         |    |    |   |   |   |   |
|         |                        |                      |          |          |      |      |            |           |                                                                      |                         |    |    |   |   |   |   |
| FN1797  | 0.568                  | 11.975               | 1.291e-1 | 1.38e-1  | 21   | 68   | 30.6725    | 88.5099   | AAL93896.1  Spermidine/putrescine transport ATP-binding protein potA |                         |    |    |   |   |   |   |
|         |                        |                      |          |          | 69   | 66   | 73.5553    | 66.0000   |                                                                      |                         |    |    |   |   |   |   |

Show detected proteins only  
 Show all proteins  
 Filter by category:

Proteins found: 1313

Enter (or paste) list of ORFs

Test Cutoff

| Signif      | Direction | Applies To |
|-------------|-----------|------------|
| red         | yes       | +          |
| yellow      | no        | n/a        |
| green       | yes       | -          |
| pink        | yes       | +          |
| light green | yes       | -          |

Applies To: ratios, bars; bars; ratios, bars; p-, q-Values

Fn Summary Table FnPg vs Fn FnSg vs Fn FnPgSg vs Fn FnPgSg vs FnPg FnSg vs FnPg FnPgSg vs FnSg Fn Coverage

| Protein | FnSg vs FnPg           |                      |          |          | Raw  |      | Normalized |          | Description                                                               | Log <sub>2</sub> Ratios |    |    |   |   |   |   |
|---------|------------------------|----------------------|----------|----------|------|------|------------|----------|---------------------------------------------------------------------------|-------------------------|----|----|---|---|---|---|
|         | Log <sub>2</sub> Ratio | Log <sub>2</sub> Sum | q-Value  | p-Value  | FnPg | FnSg | FnPg       | FnSg     |                                                                           | -6                      | -4 | -2 | 0 | 2 | 4 | 6 |
| FN1798  | -0.526                 | 6.303                |          |          |      | 6    |            | 7.8097   | AAL93897.1   Spermidine/putrescine transport system permease protein potB |                         |    |    |   |   |   |   |
|         |                        |                      |          |          | 10   | 7    | 10.6602    | 7.0000   |                                                                           |                         |    |    |   |   |   |   |
| FN1800  | 1.122                  | 14.418               | 2.047e-2 | 4.821e-3 | 57   | 141  | 83.2539    | 183.5279 | AAL93899.1   Peptidyl-prolyl cis-trans isomerase                          |                         |    |    |   |   |   |   |
|         |                        |                      |          |          | 110  | 253  | 117.2621   | 253.0000 |                                                                           |                         |    |    |   |   |   |   |
| FN1801  | -0.248                 | 9.652                |          |          |      | 20   |            | 26.0323  | AAL93900.1   Sodium/glutamate symport carrier protein                     |                         |    |    |   |   |   |   |
|         |                        |                      |          |          | 29   |      | 30.9146    |          |                                                                           |                         |    |    |   |   |   |   |
| FN1803  |                        |                      |          |          |      | 6    |            | 7.8097   | AAL93902.1   Transcriptional regulator, TetR family                       |                         |    |    |   |   |   |   |
|         |                        |                      |          |          |      | 12   |            | 12.0000  |                                                                           |                         |    |    |   |   |   |   |
| FN1804  | 0.435                  | 9.539                |          |          |      | 18   |            | 23.4291  | AAL93903.1   Aminoacyl-histidine dipeptidase                              |                         |    |    |   |   |   |   |
|         |                        |                      |          |          | 22   | 40   | 23.4524    | 40.0000  |                                                                           |                         |    |    |   |   |   |   |
| FN1807  | -0.674                 | 16.225               | 3.372e-3 | 3.296e-4 | 251  | 186  | 366.6095   | 242.1007 | AAL93906.1   Hypothetical protein                                         |                         |    |    |   |   |   |   |
|         |                        |                      |          |          | 312  | 196  | 332.5980   | 196.0000 |                                                                           |                         |    |    |   |   |   |   |
| FN1808  | -0.712                 | 6.642                |          |          |      | 6    |            | 7.8097   | AAL93907.1   Hypothetical protein                                         |                         |    |    |   |   |   |   |
|         |                        |                      |          |          | 12   |      | 12.7922    |          |                                                                           |                         |    |    |   |   |   |   |
| FN1809  | -0.495                 | 8.680                | 3.109e-1 | 5.889e-1 | 3    | 17   | 4.3818     | 22.1275  | AAL93908.1   Iron/zinc/copper-binding protein                             |                         |    |    |   |   |   |   |
|         |                        |                      |          |          | 41   | 12   | 43.7068    | 12.0000  |                                                                           |                         |    |    |   |   |   |   |
| FN1811  | -0.288                 | 8.771                | 2.86e-1  | 5.229e-1 | 9    | 16   | 13.1454    | 20.8259  | AAL93910.1   Manganese transport system ATP-binding protein mntA          |                         |    |    |   |   |   |   |
|         |                        |                      |          |          | 31   | 17   | 33.0466    | 17.0000  |                                                                           |                         |    |    |   |   |   |   |
| FN1812  | -1.699                 | 12.344               | 1.422e-1 | 1.687e-1 | 148  | 30   | 216.1681   | 39.0485  | AAL93911.1   Manganese-binding protein                                    |                         |    |    |   |   |   |   |
|         |                        |                      |          |          | 41   | 41   | 43.7068    | 41.0000  |                                                                           |                         |    |    |   |   |   |   |
| FN1813  | -0.343                 | 6.485                |          |          |      | 6    |            | 7.8097   | AAL93912.1   Manganese-binding protein                                    |                         |    |    |   |   |   |   |
|         |                        |                      |          |          | 10   | 9    | 10.6602    | 9.0000   |                                                                           |                         |    |    |   |   |   |   |
| FN1814  |                        |                      |          |          |      | 8    |            | 10.4129  | AAL93913.1   Hypothetical protein                                         |                         |    |    |   |   |   |   |
|         |                        |                      |          |          |      |      |            |          |                                                                           |                         |    |    |   |   |   |   |
| FN1816  | 1.470                  | 8.145                |          |          | 8    |      | 11.6848    |          | AAL93915.1   unknown                                                      |                         |    |    |   |   |   |   |
|         |                        |                      |          |          | 8    | 28   | 8.5282     | 28.0000  |                                                                           |                         |    |    |   |   |   |   |
| FN1817  | -0.105                 | 5.275                |          |          | 3    |      | 4.3818     |          | AAL93916.1   Hemolysin                                                    |                         |    |    |   |   |   |   |
|         |                        |                      |          |          | 8    | 6    | 8.5282     | 6.0000   |                                                                           |                         |    |    |   |   |   |   |
| FN1826  | 0.127                  | 10.071               | 1.876e-1 | 2.815e-1 | 24   | 25   | 35.0543    | 32.5404  | AAL93925.1   Protease                                                     |                         |    |    |   |   |   |   |
|         |                        |                      |          |          | 26   | 36   | 27.7165    | 36.0000  |                                                                           |                         |    |    |   |   |   |   |
| FN1827  | 1.020                  | 12.239               | 6.817e-3 | 9.539e-4 | 26   | 83   | 37.9755    | 108.0342 | AAL93926.1   Replicative DNA helicase                                     |                         |    |    |   |   |   |   |
|         |                        |                      |          |          | 56   | 90   | 59.6971    | 90.0000  |                                                                           |                         |    |    |   |   |   |   |

Show detected proteins only  
 Show all proteins  
 Filter by category:

Proteins found:  
1313

Test Cutoff

| Signif | Direction | Applies To   |
|--------|-----------|--------------|
| yes    | +         | ratios, bars |
| no     | n/a       | bars         |
| yes    | -         | ratios, bars |
| yes    | +         | p-, q-Values |
| yes    | -         | p-, q-Values |

Fn Summary Table FnPg vs Fn FnSg vs Fn FnPgSg vs Fn FnPgSg vs FnPg FnSg vs FnPg FnPgSg vs FnSg Fn Coverage

| Protein | FnSg vs FnPg           |                      |          |          | Raw  |      | Normalized |           | Description                                                 | Log <sub>2</sub> Ratios |    |    |   |   |   |   |
|---------|------------------------|----------------------|----------|----------|------|------|------------|-----------|-------------------------------------------------------------|-------------------------|----|----|---|---|---|---|
|         | Log <sub>2</sub> Ratio | Log <sub>2</sub> Sum | q-Value  | p-Value  | FnPg | FnSg | FnPg       | FnSg      |                                                             |                         |    |    |   |   |   |   |
|         |                        |                      |          |          |      |      |            |           |                                                             | -6                      | -4 | -2 | 0 | 2 | 4 | 6 |
| FN1828  | -1.269                 | 11.642               | 1.606e-1 | 2.157e-1 | 99   | 26   | 144.5990   | 33.8420   | AAL93927.1  LSU ribosomal protein L9P                       |                         |    |    |   |   |   |   |
|         |                        |                      |          |          | 29   | 39   | 30.9146    | 39.0000   |                                                             |                         |    |    |   |   |   |   |
| FN1830  | 0.512                  | 11.292               | 1.423e-1 | 1.689e-1 | 18   | 55   | 26.2907    | 71.5889   | AAL93929.1  DNA polymerase III subunits gamma and tau       |                         |    |    |   |   |   |   |
|         |                        |                      |          |          | 54   | 48   | 57.5650    | 48.0000   |                                                             |                         |    |    |   |   |   |   |
| FN1831  | 0.260                  | 13.637               | 5.632e-2 | 2.828e-2 | 77   | 93   | 112.4659   | 121.0503  | AAL93930.1  Nitrogen assimilation regulatory protein        |                         |    |    |   |   |   |   |
|         |                        |                      |          |          | 88   | 126  | 93.8097    | 126.0000  |                                                             |                         |    |    |   |   |   |   |
| FN1832  |                        |                      |          |          |      | 6    |            | 7.8097    | AAL93931.1  TonB protein                                    |                         |    |    |   |   |   |   |
| FN1833  |                        |                      |          |          | 17   |      | 18.1223    |           | AAL93932.1  Biopolymer transport exbD protein               |                         |    |    |   |   |   |   |
| FN1834  | -0.241                 | 9.508                | 1.259e-1 | 1.314e-1 | 19   | 22   | 27.7513    | 28.6356   | AAL93933.1  Biopolymer transport exbB protein               |                         |    |    |   |   |   |   |
|         |                        |                      |          |          | 29   | 21   | 30.9146    | 21.0000   |                                                             |                         |    |    |   |   |   |   |
| FN1836  | 0.289                  | 11.477               | 1.511e-1 | 1.931e-1 | 26   | 40   | 37.9755    | 52.0647   | AAL93935.1  Tetratricopeptide repeat family protein         |                         |    |    |   |   |   |   |
|         |                        |                      |          |          | 55   | 66   | 58.6311    | 66.0000   |                                                             |                         |    |    |   |   |   |   |
| FN1838  |                        |                      |          |          | 32   |      | 34.1126    |           | AAL93937.1  Glycerol uptake facilitator protein             |                         |    |    |   |   |   |   |
| FN1839  | 0.522                  | 19.415               | 1.45e-1  | 1.761e-1 | 286  | 914  | 417.7303   | 1189.6775 | AAL93938.1  Glycerol kinase                                 |                         |    |    |   |   |   |   |
|         |                        |                      |          |          | 917  | 814  | 977.5397   | 814.0000  |                                                             |                         |    |    |   |   |   |   |
| FN1840  | -0.255                 | 12.741               | 1.327e-1 | 1.457e-1 | 53   | 58   | 77.4116    | 75.4938   | AAL93939.1  Dihydroxyacetone kinase                         |                         |    |    |   |   |   |   |
|         |                        |                      |          |          | 97   | 76   | 103.4039   | 76.0000   |                                                             |                         |    |    |   |   |   |   |
| FN1841  | -0.945                 | 7.690                | 1.431e-1 | 1.711e-1 | 20   | 9    | 29.2119    | 11.7145   | AAL93940.1  Dihydroxyacetone kinase                         |                         |    |    |   |   |   |   |
|         |                        |                      |          |          | 10   | 9    | 10.6602    | 9.0000    |                                                             |                         |    |    |   |   |   |   |
| FN1842  | 0.171                  | 9.552                | 3.228e-1 | 6.224e-1 | 12   | 17   | 17.5271    | 22.1275   | AAL93941.1  Dihydroxyacetone kinase phosphotransfer protein |                         |    |    |   |   |   |   |
|         |                        |                      |          |          | 32   | 36   | 34.1126    | 36.0000   |                                                             |                         |    |    |   |   |   |   |
| FN1843  |                        |                      |          |          | 3    |      | 4.3818     |           | AAL93942.1  Surface antigen                                 |                         |    |    |   |   |   |   |
| FN1844  | 0.966                  | 5.794                |          |          |      | 8    |            | 10.4129   | AAL93943.1  Ketoacyl reductase hetN                         |                         |    |    |   |   |   |   |
|         |                        |                      |          |          | 5    |      | 5.3301     |           |                                                             |                         |    |    |   |   |   |   |
| FN1847  | 0.414                  | 8.493                | 2.27e-1  | 3.773e-1 | 5    | 16   | 7.3030     | 20.8259   | AAL93946.1  DTDP-4-dehydrorhamnose 3,5-epimerase            |                         |    |    |   |   |   |   |
|         |                        |                      |          |          | 24   | 23   | 25.5845    | 23.0000   |                                                             |                         |    |    |   |   |   |   |
| FN1848  |                        |                      |          |          | 5    |      | 5.3301     |           | AAL93947.1  Metal dependent hydrolase                       |                         |    |    |   |   |   |   |

Show detected proteins only  
 Show all proteins  
 Filter by category:

Proteins found: 1313

Test Cutoff

| Signif | Direction | Applies To   |
|--------|-----------|--------------|
| yes    | +         | ratios, bars |
| no     | n/a       | bars         |
| yes    | -         | ratios, bars |
| yes    | +         | p-, q-Values |
| yes    | -         |              |



Fn Summary Table FnPg vs Fn FnSg vs Fn FnPgSg vs Fn FnPgSg vs FnPg FnSg vs FnPg FnPgSg vs FnSg Fn Coverage

| Protein | FnSg vs FnPg           |                      |          |          | Raw  |       |           |           | Normalized |      |      |      | Description                                                       | Log <sub>2</sub> Ratios |    |    |   |   |   |   |
|---------|------------------------|----------------------|----------|----------|------|-------|-----------|-----------|------------|------|------|------|-------------------------------------------------------------------|-------------------------|----|----|---|---|---|---|
|         | Log <sub>2</sub> Ratio | Log <sub>2</sub> Sum | q-Value  | p-Value  | FnPg | FnSg  | FnPg      | FnSg      | FnPg       | FnSg | FnPg | FnSg |                                                                   |                         |    |    |   |   |   |   |
|         |                        |                      |          |          |      |       |           |           |            |      |      |      |                                                                   | -6                      | -4 | -2 | 0 | 2 | 4 | 6 |
| FN1849  | 0.368                  | 9.722                |          |          |      | 20    |           | 26.0323   |            |      |      |      | AAL93948.1  Coenzyme F390 synthetase                              |                         |    |    |   |   |   |   |
|         |                        |                      |          |          | 24   | 40    | 25.5845   | 40.0000   |            |      |      |      |                                                                   |                         |    |    |   |   |   |   |
| FN1850  | -0.055                 | 11.300               |          |          |      | 25    |           | 32.5404   |            |      |      |      | AAL93949.1  3-oxoacyl-[acyl-carrier-protein] synthase III         |                         |    |    |   |   |   |   |
|         |                        |                      |          |          | 48   | 66    | 51.1689   | 66.0000   |            |      |      |      |                                                                   |                         |    |    |   |   |   |   |
| FN1851  | 0.678                  | 13.965               | 1.604e-1 | 2.152e-1 | 23   | 129   | 33.5937   | 167.9085  |            |      |      |      | AAL93950.1  Ribonuclease PH                                       |                         |    |    |   |   |   |   |
|         |                        |                      |          |          | 156  | 152   | 166.2990  | 152.0000  |            |      |      |      |                                                                   |                         |    |    |   |   |   |   |
| FN1852  | -0.392                 | 9.834                | 2.384e-1 | 4.069e-1 | 16   | 29    | 23.3695   | 37.7469   |            |      |      |      | AAL93951.1  unknown                                               |                         |    |    |   |   |   |   |
|         |                        |                      |          |          | 43   | 15    | 45.8388   | 15.0000   |            |      |      |      |                                                                   |                         |    |    |   |   |   |   |
| FN1853  | -0.788                 | 7.923                | 1.487e-1 | 1.865e-1 | 20   | 9     | 29.2119   | 11.7145   |            |      |      |      | AAL93952.1  Methylaspartate mutase                                |                         |    |    |   |   |   |   |
|         |                        |                      |          |          | 11   | 12    | 11.7262   | 12.0000   |            |      |      |      |                                                                   |                         |    |    |   |   |   |   |
| FN1854  | -0.123                 | 10.528               | 3.29e-1  | 6.402e-1 | 33   | 22    | 48.1997   | 28.6356   |            |      |      |      | AAL93953.1  Methylaspartate mutase                                |                         |    |    |   |   |   |   |
|         |                        |                      |          |          | 30   | 45    | 31.9806   | 45.0000   |            |      |      |      |                                                                   |                         |    |    |   |   |   |   |
| FN1855  | 0.517                  | 4.702                |          |          |      | 4     |           | 5.2065    |            |      |      |      | AAL93954.1  Methylaspartate mutase                                |                         |    |    |   |   |   |   |
|         |                        |                      |          |          | 4    | 7     | 4.2641    | 7.0000    |            |      |      |      |                                                                   |                         |    |    |   |   |   |   |
| FN1856  | 0.234                  | 23.635               | 1.666e-1 | 2.3e-1   | 2099 | 2497  | 3065.7899 | 3250.1366 |            |      |      |      | AAL93955.1  Butyrate-acetoacetate CoA-transferase subunit B       |                         |    |    |   |   |   |   |
|         |                        |                      |          |          | 3369 | 4579  | 3591.4189 | 4579.0000 |            |      |      |      |                                                                   |                         |    |    |   |   |   |   |
| FN1857  | 0.178                  | 20.954               | 2.462e-2 | 6.517e-3 | 897  | 1208  | 1310.1542 | 1572.3528 |            |      |      |      | AAL93956.1  Acetoacetate: butyrate/acetate coenzyme A transferase |                         |    |    |   |   |   |   |
|         |                        |                      |          |          | 1285 | 1459  | 1369.8348 | 1459.0000 |            |      |      |      |                                                                   |                         |    |    |   |   |   |   |
| FN1858  |                        |                      |          |          | 30   |       | 43.8179   |           |            |      |      |      | AAL93957.1  Short-chain fatty acids transporter                   |                         |    |    |   |   |   |   |
|         |                        |                      |          |          |      |       |           |           |            |      |      |      |                                                                   |                         |    |    |   |   |   |   |
| FN1859  | 1.191                  | 25.873               | 1.008e-1 | 8.631e-2 | 443  | 11444 | 647.0438  | 14895.699 |            |      |      |      | AAL93958.1  Major outer membrane protein                          |                         |    |    |   |   |   |   |
|         |                        |                      |          |          | 9128 | 8794  | 9730.6240 | 8794.0000 |            |      |      |      |                                                                   |                         |    |    |   |   |   |   |
| FN1860  | -1.559                 | 10.843               |          |          |      | 23    |           | 29.9372   |            |      |      |      | AAL93959.1  NA+/H+ antiporter NHAC                                |                         |    |    |   |   |   |   |
|         |                        |                      |          |          | 69   | 20    | 73.5553   | 20.0000   |            |      |      |      |                                                                   |                         |    |    |   |   |   |   |
| FN1862  | -1.125                 | 14.812               | 9.372e-2 | 7.598e-2 | 232  | 82    | 338.8582  | 106.7326  |            |      |      |      | AAL93961.1  L-beta-lysine 5,6-aminomutase beta subunit            |                         |    |    |   |   |   |   |
|         |                        |                      |          |          | 152  | 123   | 162.0349  | 123.0000  |            |      |      |      |                                                                   |                         |    |    |   |   |   |   |
| FN1863  | -1.845                 | 17.556               | 1.401e-1 | 1.632e-1 | 957  | 183   | 1397.7899 | 238.1958  |            |      |      |      | AAL93962.1  L-beta-lysine 5,6-aminomutase alpha subunit           |                         |    |    |   |   |   |   |
|         |                        |                      |          |          | 250  | 225   | 266.5048  | 225.0000  |            |      |      |      |                                                                   |                         |    |    |   |   |   |   |
| FN1864  | -1.469                 | 6.256                | 1.605e-1 | 2.155e-1 | 17   | 5     | 24.8301   | 6.5081    |            |      |      |      | AAL93963.1  DNA mismatch repair protein mutS                      |                         |    |    |   |   |   |   |
|         |                        |                      |          |          | 4    | 4     | 4.2641    | 4.0000    |            |      |      |      |                                                                   |                         |    |    |   |   |   |   |
| FN1866  | -0.412                 | 20.194               | 1.69e-1  | 2.359e-1 | 1117 | 722   | 1631.4852 | 939.7672  |            |      |      |      | AAL93965.1  Lysine 2,3-aminomutase                                |                         |    |    |   |   |   |   |
|         |                        |                      |          |          | 840  | 959   | 895.4562  | 959.0000  |            |      |      |      |                                                                   |                         |    |    |   |   |   |   |

Show detected proteins only  
 Show all proteins  
 Filter by category:

Proteins found: 1313

Test Cutoff

| Signif | Direction | Applies To   |
|--------|-----------|--------------|
| yes    | +         | ratios, bars |
| no     | n/a       | bars         |
| yes    | -         | ratios, bars |
| yes    | +         | p-, q-Values |
| yes    | -         |              |

Fn Summary Table FnPg vs Fn FnSg vs Fn FnPgSg vs Fn FnPgSg vs FnPg FnSg vs FnPg FnPgSg vs FnSg Fn Coverage

| Protein | FnSg vs FnPg           |                      |          |          | Raw  |      | Normalized |          | Description                                                                | Log <sub>2</sub> Ratios |    |    |   |   |   |   |
|---------|------------------------|----------------------|----------|----------|------|------|------------|----------|----------------------------------------------------------------------------|-------------------------|----|----|---|---|---|---|
|         | Log <sub>2</sub> Ratio | Log <sub>2</sub> Sum | q-Value  | p-Value  | FnPg | FnSg | FnPg       | FnSg     |                                                                            | -6                      | -4 | -2 | 0 | 2 | 4 | 6 |
| FN1867  | -1.540                 | 18.656               | 8.989e-2 | 6.929e-2 | 1058 | 281  | 1545.3100  | 365.7543 | AAL93966.1  Zn-dependent alcohol dehydrogenases and related dehydrogenases |                         |    |    |   |   |   |   |
|         |                        |                      |          |          | 607  | 388  | 647.0737   | 388.0000 |                                                                            |                         |    |    |   |   |   |   |
| FN1868  | -0.572                 | 13.089               | 1.043e-1 | 9.186e-2 | 96   | 60   | 140.2172   | 78.0970  | AAL93967.1  Hypothetical cytosolic protein                                 |                         |    |    |   |   |   |   |
|         |                        |                      |          |          | 82   | 75   | 87.4136    | 75.0000  |                                                                            |                         |    |    |   |   |   |   |
| FN1869  | -1.008                 | 14.117               | 9.304e-2 | 7.475e-2 | 172  | 63   | 251.2224   | 82.0018  | AAL93968.1  Hypothetical protein                                           |                         |    |    |   |   |   |   |
|         |                        |                      |          |          | 119  | 106  | 126.8563   | 106.0000 |                                                                            |                         |    |    |   |   |   |   |
| FN1872  |                        |                      |          |          |      |      |            |          | AAL93971.1  unknown                                                        |                         |    |    |   |   |   |   |
|         |                        |                      |          |          |      | 5    |            | 5.0000   |                                                                            |                         |    |    |   |   |   |   |
| FN1873  | -1.221                 | 9.036                | 2.383e-3 | 1.633e-4 | 26   | 10   | 37.9755    | 13.0162  | AAL93972.1  Bis(5'-nucleosyl)-tetrphosphatase                              |                         |    |    |   |   |   |   |
|         |                        |                      |          |          | 30   | 17   | 31.9806    | 17.0000  |                                                                            |                         |    |    |   |   |   |   |
| FN1874  | -0.061                 | 8.791                | 3.998e-1 | 8.696e-1 | 9    | 14   | 13.1454    | 18.2226  | AAL93973.1  Ribose 5-phosphate isomerase                                   |                         |    |    |   |   |   |   |
|         |                        |                      |          |          | 28   | 23   | 29.8485    | 23.0000  |                                                                            |                         |    |    |   |   |   |   |
| FN1875  | 0.544                  | 14.919               | 2.095e-2 | 4.997e-3 | 112  | 159  | 163.5867   | 206.9570 | AAL93974.1  Peptidyl-prolyl cis-trans isomerase                            |                         |    |    |   |   |   |   |
|         |                        |                      |          |          | 120  | 218  | 127.9223   | 218.0000 |                                                                            |                         |    |    |   |   |   |   |
| FN1877  |                        |                      |          |          |      |      |            |          | AAL93976.1  Guanine-hypoxanthine permease                                  |                         |    |    |   |   |   |   |
|         |                        |                      |          |          | 6    |      | 6.3961     |          |                                                                            |                         |    |    |   |   |   |   |
| FN1880  | -0.560                 | 14.219               | 3.269e-2 | 1.06e-2  | 118  | 101  | 172.3503   | 131.4633 | AAL93979.1  Oxygen-insensitive NAD(P)H nitroreductase                      |                         |    |    |   |   |   |   |
|         |                        |                      |          |          | 153  | 96   | 163.1009   | 96.0000  |                                                                            |                         |    |    |   |   |   |   |
| FN1881  | 0.309                  | 7.137                |          |          |      | 8    |            | 10.4129  | AAL93980.1  Esterase                                                       |                         |    |    |   |   |   |   |
|         |                        |                      |          |          | 10   | 16   | 10.6602    | 16.0000  |                                                                            |                         |    |    |   |   |   |   |
| FN1884  |                        |                      |          |          | 32   |      | 46.7391    |          | AAL93983.1  unknown                                                        |                         |    |    |   |   |   |   |
|         |                        |                      |          |          |      |      |            |          |                                                                            |                         |    |    |   |   |   |   |
| FN1890  |                        |                      |          |          | 22   |      | 32.1331    |          | AAL93989.1  Hypothetical protein                                           |                         |    |    |   |   |   |   |
|         |                        |                      |          |          |      |      |            |          |                                                                            |                         |    |    |   |   |   |   |
| FN1891  | 0.377                  | 9.862                | 2.765e-1 | 4.99e-1  | 6    | 25   | 8.7636     | 32.5404  | AAL93990.1  Glycerophosphoryl diester phosphodiesterase                    |                         |    |    |   |   |   |   |
|         |                        |                      |          |          | 42   | 37   | 44.7728    | 37.0000  |                                                                            |                         |    |    |   |   |   |   |
| FN1893  | -0.312                 | 17.983               | 1.168e-2 | 2.149e-3 | 389  | 336  | 568.1716   | 437.3432 | AAL93991.1  Fusobacterium outer membrane protein family                    |                         |    |    |   |   |   |   |
|         |                        |                      |          |          | 531  | 476  | 566.0562   | 476.0000 |                                                                            |                         |    |    |   |   |   |   |
| FN1898  | 1.111                  | 10.714               | 5.218e-2 | 2.468e-2 | 9    | 38   | 13.1454    | 49.4614  | AAL93997.1  Sugar transport ATP-binding protein                            |                         |    |    |   |   |   |   |
|         |                        |                      |          |          | 40   | 71   | 42.6408    | 71.0000  |                                                                            |                         |    |    |   |   |   |   |
| FN1899  | 0.364                  | 16.028               | 1.089e-1 | 9.967e-2 | 123  | 230  | 179.6532   | 299.3718 | AAL93998.1  Hypothetical lipoprotein                                       |                         |    |    |   |   |   |   |
|         |                        |                      |          |          | 259  | 287  | 276.0990   | 287.0000 |                                                                            |                         |    |    |   |   |   |   |

Show detected proteins only  
 Show all proteins  
 Filter by category:

Proteins found: 1313

Test Cutoff

| Signif      | Direction | Applies To |
|-------------|-----------|------------|
| red         | yes       | +          |
| yellow      | no        | n/a        |
| green       | yes       | -          |
| pink        | yes       | +          |
| light green | yes       | -          |

Applies To: ratios, bars; bars; ratios, bars; p-, q-Values

Fn Summary Table FnPg vs Fn FnSg vs Fn FnPgSg vs Fn FnPgSg vs FnPg FnSg vs FnPg FnPgSg vs FnSg Fn Coverage

| Protein | FnSg vs FnPg           |                      |          |          | Raw  |      | Normalized |           | Description                                                                 | Log <sub>2</sub> Ratios |    |    |   |   |   |   |
|---------|------------------------|----------------------|----------|----------|------|------|------------|-----------|-----------------------------------------------------------------------------|-------------------------|----|----|---|---|---|---|
|         | Log <sub>2</sub> Ratio | Log <sub>2</sub> Sum | q-Value  | p-Value  | FnPg | FnSg | FnPg       | FnSg      |                                                                             | -6                      | -4 | -2 | 0 | 2 | 4 | 6 |
| FN1901  |                        |                      |          |          |      | 8    |            | 8.0000    | AAL94000.1  Transcription regulator, CRP family                             |                         |    |    |   |   |   |   |
| FN1902  | -0.516                 | 9.741                | 6.493e-2 | 3.603e-2 | 26   | 23   | 37.9755    | 29.9372   | AAL94001.1  Deoxycytidylate deaminase                                       |                         |    |    |   |   |   |   |
| FN1903  |                        |                      |          |          | 17   |      | 24.8301    |           | AAL94002.1  Coenzyme A disulfide reductase/ disulfide bond regulator domain |                         |    |    |   |   |   |   |
| FN1905  |                        |                      |          |          |      | 4    |            | 4.0000    | AAL94004.1  outer membrane protein                                          |                         |    |    |   |   |   |   |
| FN1906  | 0.312                  | 18.247               | 2.136e-1 | 3.442e-1 | 222  | 408  | 324.2522   | 531.0596  | AAL94005.1  Cytosol aminopeptidase                                          |                         |    |    |   |   |   |   |
| FN1908  | 0.161                  | 17.125               | 1.713e-1 | 2.414e-1 | 213  | 330  | 311.1068   | 429.5335  | AAL94007.1  Glycerophosphoryl diester phosphodiesterase                     |                         |    |    |   |   |   |   |
| FN1909  | -0.231                 | 12.702               | 1.614e-1 | 2.176e-1 | 51   | 52   | 74.4904    | 67.6841   | AAL94008.1  UDP-3-O-[3-hydroxymyristoyl] glucosamine N-acyltransferase      |                         |    |    |   |   |   |   |
| FN1910  | -0.793                 | 14.225               | 6.115e-2 | 3.244e-2 | 148  | 107  | 216.1681   | 139.2730  | AAL94009.1  periplasmic protein                                             |                         |    |    |   |   |   |   |
| FN1911  | -0.583                 | 21.785               | 4.635e-2 | 1.968e-2 | 1822 | 1320 | 2661.2050  | 1718.1339 | AAL94010.1  Outer membrane protein                                          |                         |    |    |   |   |   |   |
| FN1912  | 0.023                  | 7.038                | 4.131e-1 | 9.189e-1 | 9    | 7    | 13.1454    | 9.1113    | AAL94011.1  Hypothetical protein                                            |                         |    |    |   |   |   |   |
| FN1913  | -0.024                 | 12.108               | 4.204e-1 | 9.471e-1 | 64   | 49   | 93.4781    | 63.7792   | AAL94012.1  hydrolase (HD superfamily)                                      |                         |    |    |   |   |   |   |
| FN1914  | -0.943                 | 13.875               | 2.323e-1 | 3.908e-1 | 213  | 69   | 311.1068   | 89.8115   | AAL94013.1  Anti-sigma F factor antagonist                                  |                         |    |    |   |   |   |   |
| FN1917  | 1.025                  | 6.379                |          |          |      | 10   |            | 13.0162   | AAL94016.1  tRNA delta(2)-isopentenylpyrophosphate transferase              |                         |    |    |   |   |   |   |
| FN1918  | 0.884                  | 12.210               | 7.514e-2 | 4.748e-2 | 19   | 73   | 27.7513    | 95.0180   | AAL94017.1  SPO0B-associated GTP-binding protein                            |                         |    |    |   |   |   |   |
| FN1919  | 0.215                  | 6.205                | 3.322e-1 | 6.495e-1 | 8    | 5    | 11.6848    | 6.5081    | AAL94018.1  Methyltransferase                                               |                         |    |    |   |   |   |   |
| FN1920  | -1.354                 | 5.354                |          |          | 7    |      | 10.2242    |           | AAL94019.1  tRNA (5-methylaminomethyl-2-thiouridylate) -methyltransferase   |                         |    |    |   |   |   |   |

Show detected proteins only  
 Show all proteins  
 Filter by category:

Proteins found: 1313

Test Cutoff

| Signif | Direction | Applies To   |
|--------|-----------|--------------|
| yes    | +         | ratios, bars |
| no     | n/a       | bars         |
| yes    | -         | ratios, bars |
| yes    | +         | p-, q-Values |
| yes    | -         |              |

Fn Summary Table FnPg vs Fn FnSg vs Fn FnPgSg vs Fn FnPgSg vs FnPg FnSg vs FnPg FnPgSg vs FnSg Fn Coverage

| Protein | FnSg vs FnPg           |                      |          |          | Raw  |        |           |           | Normalized                                         |   |        |  | Log <sub>2</sub> Ratios |  |  |  |  |  |  |
|---------|------------------------|----------------------|----------|----------|------|--------|-----------|-----------|----------------------------------------------------|---|--------|--|-------------------------|--|--|--|--|--|--|
|         | Log <sub>2</sub> Ratio | Log <sub>2</sub> Sum | q-Value  | p-Value  | FnPg | FnSg   | FnPg      | FnSg      | Description                                        |   |        |  |                         |  |  |  |  |  |  |
|         |                        |                      |          |          |      |        |           |           | -6 -4 -2 0 2 4 6                                   |   |        |  |                         |  |  |  |  |  |  |
| FN1922  | -0.761                 | 7.463                | 8.127e-6 | 2.336e-8 | 12   | 8      | 17.5271   | 10.4129   | AAL94021.1  Hypothetical protein                   |   |        |  |                         |  |  |  |  |  |  |
|         |                        |                      |          |          | 16   | 10     | 17.0563   | 10.0000   |                                                    |   |        |  |                         |  |  |  |  |  |  |
| FN1923  |                        |                      |          |          |      |        |           |           | AAL94022.1  Adenine-specific methyltransferase     |   |        |  |                         |  |  |  |  |  |  |
|         |                        |                      |          |          |      |        |           |           |                                                    |   |        |  |                         |  |  |  |  |  |  |
| FN1925  |                        |                      |          |          |      |        |           |           | AAL94024.1  Arsenical pump membrane protein        |   |        |  |                         |  |  |  |  |  |  |
|         |                        |                      |          |          | 6    | 6.3961 |           |           |                                                    |   |        |  |                         |  |  |  |  |  |  |
| FN1926  | -0.156                 | 12.741               | 3.582e-1 | 7.286e-1 | 32   | 59     | 46.7391   | 76.7954   | AAL94025.1  Nitrogen regulatory IIA protein        |   |        |  |                         |  |  |  |  |  |  |
|         |                        |                      |          |          | 120  | 80     | 127.9223  | 80.0000   |                                                    |   |        |  |                         |  |  |  |  |  |  |
| FN1927  | 0.955                  | 16.177               | 5.265e-2 | 2.513e-2 | 78   | 272    | 113.9264  | 354.0397  | AAL94026.1  DEGV protein                           |   |        |  |                         |  |  |  |  |  |  |
|         |                        |                      |          |          | 260  | 404    | 277.1650  | 404.0000  |                                                    |   |        |  |                         |  |  |  |  |  |  |
| FN1928  | -0.663                 | 9.137                |          |          |      |        |           |           | AAL94027.1  Transcriptional regulator, MerR family |   |        |  |                         |  |  |  |  |  |  |
|         |                        |                      |          |          | 28   | 26     | 29.8485   | 26.0000   |                                                    |   |        |  |                         |  |  |  |  |  |  |
| FN1929  | 0.847                  | 11.866               | 1.253e-1 | 1.302e-1 | 12   | 46     | 17.5271   | 59.8744   | AAL94028.1  Competence-damage protein cinA         |   |        |  |                         |  |  |  |  |  |  |
|         |                        |                      |          |          | 69   | 104    | 73.5553   | 104.0000  |                                                    |   |        |  |                         |  |  |  |  |  |  |
| FN1931  | 0.801                  | 6.600                |          |          |      |        |           |           | AAL94030.1  Protease                               |   |        |  |                         |  |  |  |  |  |  |
|         |                        |                      |          |          | 7    | 13     | 7.4621    | 13.0000   |                                                    |   |        |  |                         |  |  |  |  |  |  |
| FN1933  | 0.522                  | 6.291                | 2.27e-1  | 3.773e-1 | 5    | 4      | 7.3030    | 5.2065    | AAL94032.1  Hypothetical protein                   |   |        |  |                         |  |  |  |  |  |  |
|         |                        |                      |          |          | 7    | 16     | 7.4621    | 16.0000   |                                                    |   |        |  |                         |  |  |  |  |  |  |
| FN1935  | 0.477                  | 5.832                |          |          |      |        |           |           | AAL94034.1  Adenine-specific methyltransferase     |   |        |  |                         |  |  |  |  |  |  |
|         |                        |                      |          |          | 6    | 10     | 6.3961    | 10.0000   |                                                    |   |        |  |                         |  |  |  |  |  |  |
| FN1939  | -0.760                 | 7.920                |          |          |      |        |           |           | AAL94038.1  Hypothetical protein                   |   |        |  |                         |  |  |  |  |  |  |
|         |                        |                      |          |          | 19   | 7      | 20.2544   | 7.0000    |                                                    |   |        |  |                         |  |  |  |  |  |  |
| FN1941  | 0.513                  | 17.330               | 7.283e-2 | 4.464e-2 | 239  | 314    | 349.0823  | 408.7076  | AAL94040.1  ClpB protein                           |   |        |  |                         |  |  |  |  |  |  |
|         |                        |                      |          |          | 310  | 561    | 330.4660  | 561.0000  |                                                    |   |        |  |                         |  |  |  |  |  |  |
| FN1942  | -1.547                 | 5.547                |          |          | 8    |        |           |           | AAL94041.1  putative DNA-binding protein           |   |        |  |                         |  |  |  |  |  |  |
|         |                        |                      |          |          |      |        |           |           |                                                    | 4 | 4.0000 |  |                         |  |  |  |  |  |  |
| FN1943  | -0.408                 | 24.213               | 8.632e-2 | 6.342e-2 | 4000 | 2836   | 5842.3820 | 3691.3846 | AAL94042.1  Tryptophanase                          |   |        |  |                         |  |  |  |  |  |  |
|         |                        |                      |          |          | 4049 | 3965   | 4316.3121 | 3965.0000 |                                                    |   |        |  |                         |  |  |  |  |  |  |
| FN1948  | 0.350                  | 6.149                |          |          |      |        |           |           | AAL94044.1  Hypothetical protein                   |   |        |  |                         |  |  |  |  |  |  |
|         |                        |                      |          |          | 7    | 6      | 7.4621    | 6.0000    |                                                    |   |        |  |                         |  |  |  |  |  |  |
| FN1949  | 0.180                  | 11.924               | 3.175e-1 | 6.074e-1 | 24   | 52     | 35.0543   | 67.6841   | AAL94045.1  Xaa-Pro dipeptidase                    |   |        |  |                         |  |  |  |  |  |  |
|         |                        |                      |          |          | 77   | 65     | 82.0835   | 65.0000   |                                                    |   |        |  |                         |  |  |  |  |  |  |

Show detected proteins only  
 Show all proteins  
 Filter by category:

Proteins found: 1313

Enter (or paste) list of ORFs

Find ORFs

Test Cutoff

q-Value

p-Value

.005

| Signif | Direction | Applies To   |
|--------|-----------|--------------|
| yes    | +         | ratios, bars |
| no     | n/a       | bars         |
| yes    | -         | ratios, bars |
| yes    | +         | p-, q-Values |
| yes    | -         | p-, q-Values |

Dot Plots Dot Plots

Fn Summary Table FnPg vs Fn FnSg vs Fn FnPgSg vs Fn FnPgSg vs FnPg FnSg vs FnPg FnPgSg vs FnSg Fn Coverage

| Protein       | FnSg vs FnPg           |                      |          |          | Raw  |      | Normalized |          | Description                                                            | Log <sub>2</sub> Ratios |    |    |   |   |   |   |
|---------------|------------------------|----------------------|----------|----------|------|------|------------|----------|------------------------------------------------------------------------|-------------------------|----|----|---|---|---|---|
|               | Log <sub>2</sub> Ratio | Log <sub>2</sub> Sum | q-Value  | p-Value  | FnPg | FnSg | FnPg       | FnSg     |                                                                        |                         |    |    |   |   |   |   |
|               |                        |                      |          |          |      |      |            |          |                                                                        | -6                      | -4 | -2 | 0 | 2 | 4 | 6 |
| <b>FN1951</b> |                        |                      |          |          |      | 4    |            | 4.0000   | AAL94047.1  ATPase associated with chromosome architecture/replication |                         |    |    |   |   |   |   |
| <b>FN1956</b> | -0.298                 | 7.700                |          |          |      | 10   |            | 13.0162  | AAL94052.1  Hypothetical protein                                       |                         |    |    |   |   |   |   |
| <b>FN1964</b> | -0.516                 | 8.101                | 3.728e-2 | 1.334e-2 | 14   | 9    | 20.4483    | 11.7145  | AAL94054.1  O-linked GLCNAC transferase                                |                         |    |    |   |   |   |   |
| <b>FN1965</b> | -0.338                 | 11.256               | 1.657e-1 | 2.279e-1 | 44   | 43   | 64.2662    | 55.9695  | AAL94055.1  Tetratricopeptide repeat family protein                    |                         |    |    |   |   |   |   |
| <b>FN1966</b> | 1.158                  | 11.435               | 6.287e-3 | 8.25e-4  | 30   | 67   | 43.8179    | 87.2083  | AAL94056.1  Hypothetical protein                                       |                         |    |    |   |   |   |   |
| <b>FN1971</b> | -2.347                 | 8.257                |          |          |      | 5    |            | 6.5081   | AAL94061.1  Hemin receptor                                             |                         |    |    |   |   |   |   |
| <b>FN1972</b> | -0.837                 | 11.209               |          |          |      | 16   |            | 20.8259  | AAL94062.1  unknown                                                    |                         |    |    |   |   |   |   |
| <b>FN1973</b> | -1.255                 | 13.137               | 3.793e-3 | 3.849e-4 | 111  | 56   | 162.1261   | 72.8905  | AAL94063.1  Translation initiation inhibitor                           |                         |    |    |   |   |   |   |
| <b>FN1974</b> |                        |                      |          |          |      | 7    |            | 7.0000   | AAL94064.1  DNA/RNA helicase (DEAD/DEAH BOX family)                    |                         |    |    |   |   |   |   |
| <b>FN1975</b> | 0.665                  | 13.152               | 5.242e-2 | 2.491e-2 | 49   | 107  | 71.5692    | 139.2730 | AAL94065.1  ATP-dependent RNA helicase                                 |                         |    |    |   |   |   |   |
| <b>FN1976</b> | 1.211                  | 11.021               | 6.886e-2 | 4.014e-2 | 6    | 62   | 8.7636     | 80.7002  | AAL94066.1  4-amino-4-deoxychorismate lyase                            |                         |    |    |   |   |   |   |
| <b>FN1977</b> | -0.068                 | 6.640                |          |          | 7    | 5    | 10.2242    | 6.5081   | AAL94067.1  Cell cycle protein MesJ                                    |                         |    |    |   |   |   |   |
| <b>FN1978</b> | 0.577                  | 12.567               | 1.734e-1 | 2.467e-1 | 18   | 64   | 26.2907    | 83.3035  | AAL94068.1  Cell division protein ftsH                                 |                         |    |    |   |   |   |   |
| <b>FN1979</b> |                        |                      |          |          | 15   |      | 21.9089    |          | AAL94069.1  SSU ribosomal protein S15P                                 |                         |    |    |   |   |   |   |
| <b>FN1980</b> |                        |                      |          |          |      | 4    |            | 5.2065   | AAL94070.1  Transporter                                                |                         |    |    |   |   |   |   |
| <b>FN1983</b> | -0.019                 | 15.679               | 4.017e-1 | 8.765e-1 | 139  | 186  | 203.0228   | 242.1007 | AAL94073.1  Alkyl hydroperoxide reductase C22 protein                  |                         |    |    |   |   |   |   |

Show detected proteins only  
 Show all proteins  
 Filter by category:

Proteins found: 1313

Enter (or paste) list of ORFs

Find ORFs

Test Cutoff

q-Value

p-Value

.005

| Signif | Direction | Applies To   |
|--------|-----------|--------------|
| yes    | +         | ratios, bars |
| no     | n/a       | bars         |
| yes    | -         | ratios, bars |
| yes    | +         | p-, q-Values |
| yes    | -         | p-, q-Values |

Dot Plots Dot Plots

Fn Summary Table FnPg vs Fn FnSg vs Fn FnPgSg vs Fn FnPgSg vs FnPg FnSg vs FnPg FnPgSg vs FnSg Fn Coverage

| Protein | FnSg vs FnPg           |                      |          |          | Raw  |      |           |           | Normalized                                                    |  |  |  | Log <sub>2</sub> Ratios |  |  |  |  |  |  |  |  |  |  |  |
|---------|------------------------|----------------------|----------|----------|------|------|-----------|-----------|---------------------------------------------------------------|--|--|--|-------------------------|--|--|--|--|--|--|--|--|--|--|--|
|         | Log <sub>2</sub> Ratio | Log <sub>2</sub> Sum | q-Value  | p-Value  | FnPg | FnSg | FnPg      | FnSg      | Description                                                   |  |  |  |                         |  |  |  |  |  |  |  |  |  |  |  |
|         |                        |                      |          |          |      |      |           |           |                                                               |  |  |  |                         |  |  |  |  |  |  |  |  |  |  |  |
| FN1984  | -0.796                 | 16.375               | 1.125e-1 | 1.059e-1 | 348  | 154  | 508.2872  | 200.4490  | AAL94074.1  Thioredoxin reductase                             |  |  |  |                         |  |  |  |  |  |  |  |  |  |  |  |
|         |                        |                      |          |          | 244  | 242  | 260.1087  | 242.0000  |                                                               |  |  |  |                         |  |  |  |  |  |  |  |  |  |  |  |
| FN1985  | 0.335                  | 12.626               | 3.078e-1 | 5.806e-1 | 13   | 65   | 18.9877   | 84.6051   | AAL94075.1  Inner membrane protein                            |  |  |  |                         |  |  |  |  |  |  |  |  |  |  |  |
|         |                        |                      |          |          | 115  | 94   | 122.5922  | 94.0000   |                                                               |  |  |  |                         |  |  |  |  |  |  |  |  |  |  |  |
| FN1986  | -0.445                 | 16.160               | 1.209e-1 | 1.211e-1 | 255  | 222  | 372.4518  | 288.9589  | AAL94076.1  Hypothetical protein                              |  |  |  |                         |  |  |  |  |  |  |  |  |  |  |  |
|         |                        |                      |          |          | 243  | 175  | 259.0427  | 175.0000  |                                                               |  |  |  |                         |  |  |  |  |  |  |  |  |  |  |  |
| FN1987  | -2.421                 | 7.591                |          |          | 22   |      | 32.1331   |           | AAL94077.1  Transcriptional regulator, GntR family            |  |  |  |                         |  |  |  |  |  |  |  |  |  |  |  |
|         |                        |                      |          |          |      | 6    |           | 6.0000    |                                                               |  |  |  |                         |  |  |  |  |  |  |  |  |  |  |  |
| FN1988  | 1.109                  | 19.941               | 6.103e-2 | 3.232e-2 | 221  | 1391 | 322.7916  | 1810.5486 | AAL94078.1  Tyrosine phenol-lyase                             |  |  |  |                         |  |  |  |  |  |  |  |  |  |  |  |
|         |                        |                      |          |          | 979  | 1137 | 1043.6329 | 1137.0000 |                                                               |  |  |  |                         |  |  |  |  |  |  |  |  |  |  |  |
| FN1989  | -0.530                 | 7.654                |          |          |      | 12   |           | 15.6194   | AAL94079.1  Sodium-dependent tyrosine transporter             |  |  |  |                         |  |  |  |  |  |  |  |  |  |  |  |
|         |                        |                      |          |          | 16   | 8    | 17.0563   | 8.0000    |                                                               |  |  |  |                         |  |  |  |  |  |  |  |  |  |  |  |
| FN1991  | -0.317                 | 17.369               | 3.052e-2 | 9.394e-3 | 334  | 260  | 487.8389  | 338.4203  | AAL94081.1  Glucosamine-1-phosphate acetyltransferase         |  |  |  |                         |  |  |  |  |  |  |  |  |  |  |  |
|         |                        |                      |          |          | 404  | 399  | 430.6718  | 399.0000  |                                                               |  |  |  |                         |  |  |  |  |  |  |  |  |  |  |  |
| FN1992  | 0.073                  | 17.114               | 3.394e-1 | 6.708e-1 | 219  | 340  | 319.8704  | 442.5496  | AAL94082.1  Ribose-phosphate pyrophosphokinase                |  |  |  |                         |  |  |  |  |  |  |  |  |  |  |  |
|         |                        |                      |          |          | 389  | 330  | 414.6815  | 330.0000  |                                                               |  |  |  |                         |  |  |  |  |  |  |  |  |  |  |  |
| FN1993  | -0.230                 | 5.124                |          |          |      | 3    |           | 3.9048    | AAL94083.1  SUA5 protein                                      |  |  |  |                         |  |  |  |  |  |  |  |  |  |  |  |
|         |                        |                      |          |          | 6    | 7    | 6.3961    | 7.0000    |                                                               |  |  |  |                         |  |  |  |  |  |  |  |  |  |  |  |
| FN1994  | -1.145                 | 10.407               | 1.637e-1 | 2.231e-1 | 59   | 35   | 86.1751   | 45.5566   | AAL94084.1  Hypothetical protein                              |  |  |  |                         |  |  |  |  |  |  |  |  |  |  |  |
|         |                        |                      |          |          | 22   | 4    | 23.4524   | 4.0000    |                                                               |  |  |  |                         |  |  |  |  |  |  |  |  |  |  |  |
| FN1995  |                        |                      |          |          |      |      |           |           | AAL94085.1  Hypothetical protein                              |  |  |  |                         |  |  |  |  |  |  |  |  |  |  |  |
|         |                        |                      |          |          | 4    |      | 4.2641    |           |                                                               |  |  |  |                         |  |  |  |  |  |  |  |  |  |  |  |
| FN2001  | -0.007                 | 8.821                |          |          |      | 18   |           | 23.4291   | AAL94091.1  Hypothetical protein                              |  |  |  |                         |  |  |  |  |  |  |  |  |  |  |  |
|         |                        |                      |          |          | 20   | 19   | 21.3204   | 19.0000   |                                                               |  |  |  |                         |  |  |  |  |  |  |  |  |  |  |  |
| FN2002  |                        |                      |          |          |      |      |           |           | AAL94092.1  Permease                                          |  |  |  |                         |  |  |  |  |  |  |  |  |  |  |  |
|         |                        |                      |          |          |      | 3    |           | 3.0000    |                                                               |  |  |  |                         |  |  |  |  |  |  |  |  |  |  |  |
| FN2007  | -1.055                 | 6.480                | 1.705e-1 | 2.394e-1 | 15   | 7    | 21.9089   | 9.1113    | AAL94097.1  Glutathione peroxidase                            |  |  |  |                         |  |  |  |  |  |  |  |  |  |  |  |
|         |                        |                      |          |          | 5    | 4    | 5.3301    | 4.0000    |                                                               |  |  |  |                         |  |  |  |  |  |  |  |  |  |  |  |
| FN2008  | -1.960                 | 6.720                |          |          |      | 4    |           | 5.2065    | AAL94098.1  Glycine betaine transport ATP-binding protein     |  |  |  |                         |  |  |  |  |  |  |  |  |  |  |  |
|         |                        |                      |          |          | 19   |      | 20.2544   |           |                                                               |  |  |  |                         |  |  |  |  |  |  |  |  |  |  |  |
| FN2009  | -0.109                 | 6.075                |          |          |      | 6    |           | 7.8097    | AAL94099.1  Glycine betaine transport system permease protein |  |  |  |                         |  |  |  |  |  |  |  |  |  |  |  |
|         |                        |                      |          |          | 8    | 8    | 8.5282    | 8.0000    |                                                               |  |  |  |                         |  |  |  |  |  |  |  |  |  |  |  |

Show detected proteins only  
 Show all proteins  
 Filter by category:

Proteins found: 1313

Enter (or paste) list of ORFs

Find ORFs

Test Cutoff

q-Value

p-Value

.005

| Signif | Direction | Applies To   |
|--------|-----------|--------------|
| yes    | +         | ratios, bars |
| no     | n/a       | bars         |
| yes    | -         | ratios, bars |
| yes    | +         | p-, q-Values |
| yes    | -         | p-, q-Values |

Dot Plots Dot Plots

Fn Summary Table FnPg vs Fn FnSg vs Fn FnPgSg vs Fn FnPgSg vs FnPg FnSg vs FnPg FnPgSg vs FnSg Fn Coverage

| Protein | FnSg vs FnPg           |                      |          |          | Raw  |      |          |          | Normalized                                                           |    |    |    | Log <sub>2</sub> Ratios |   |   |   |  |  |  |
|---------|------------------------|----------------------|----------|----------|------|------|----------|----------|----------------------------------------------------------------------|----|----|----|-------------------------|---|---|---|--|--|--|
|         | Log <sub>2</sub> Ratio | Log <sub>2</sub> Sum | q-Value  | p-Value  | FnPg | FnSg | FnPg     | FnSg     | Description                                                          |    |    |    |                         |   |   |   |  |  |  |
|         |                        |                      |          |          |      |      |          |          |                                                                      | -6 | -4 | -2 | 0                       | 2 | 4 | 6 |  |  |  |
| FN2011  | 0.571                  | 13.430               | 1.852e-1 | 2.754e-1 | 37   | 60   | 54.0420  | 78.0970  | AAL94101.1  Valyl-tRNA synthetase                                    |    |    |    |                         |   |   |   |  |  |  |
|         |                        |                      |          |          | 111  | 178  | 118.3281 | 178.0000 |                                                                      |    |    |    |                         |   |   |   |  |  |  |
| FN2013  | 0.231                  | 5.059                |          |          |      | 5    |          | 6.5081   | AAL94103.1  GTP-binding protein                                      |    |    |    |                         |   |   |   |  |  |  |
|         |                        |                      |          |          | 5    | 6    | 5.3301   | 6.0000   |                                                                      |    |    |    |                         |   |   |   |  |  |  |
| FN2014  | 0.278                  | 14.270               | 7.903e-2 | 5.265e-2 | 77   | 128  | 112.4659 | 166.6069 | AAL94104.1  ATP-dependent protease La                                |    |    |    |                         |   |   |   |  |  |  |
|         |                        |                      |          |          | 134  | 143  | 142.8466 | 143.0000 |                                                                      |    |    |    |                         |   |   |   |  |  |  |
| FN2015  | 0.357                  | 13.338               | 5.169e-2 | 2.421e-2 | 64   | 97   | 93.4781  | 126.2568 | AAL94105.1  ATP-dependent clp protease ATP-binding subunit clpX      |    |    |    |                         |   |   |   |  |  |  |
|         |                        |                      |          |          | 81   | 104  | 86.3476  | 104.0000 |                                                                      |    |    |    |                         |   |   |   |  |  |  |
| FN2016  | -0.927                 | 8.974                |          |          |      | 15   |          | 19.5242  | AAL94106.1  ATP-dependent Clp protease proteolytic subunit           |    |    |    |                         |   |   |   |  |  |  |
|         |                        |                      |          |          | 29   | 13   | 30.9146  | 13.0000  |                                                                      |    |    |    |                         |   |   |   |  |  |  |
| FN2017  | -0.681                 | 17.893               | 1.044e-1 | 9.202e-2 | 543  | 273  | 793.1034 | 355.3413 | AAL94107.1  Trigger factor, ppiase                                   |    |    |    |                         |   |   |   |  |  |  |
|         |                        |                      |          |          | 428  | 424  | 456.2563 | 424.0000 |                                                                      |    |    |    |                         |   |   |   |  |  |  |
| FN2018  | 0.021                  | 7.667                | 4.257e-1 | 9.677e-1 | 15   | 9    | 21.9089  | 11.7145  | AAL94108.1  Single-stranded-DNA-specific exonuclease recJ            |    |    |    |                         |   |   |   |  |  |  |
|         |                        |                      |          |          | 6    | 17   | 6.3961   | 17.0000  |                                                                      |    |    |    |                         |   |   |   |  |  |  |
| FN2019  | -2.820                 | 7.990                |          |          | 29   |      | 42.3573  |          | AAL94109.1  Ribosome-binding factor A                                |    |    |    |                         |   |   |   |  |  |  |
|         |                        |                      |          |          |      | 6    | 6.0000   |          |                                                                      |    |    |    |                         |   |   |   |  |  |  |
| FN2020  | 0.271                  | 16.342               | 1.647e-1 | 2.254e-1 | 190  | 196  | 277.5131 | 255.1168 | AAL94110.1  Bacterial Protein Translation Initiation Factor 2 (IF-2) |    |    |    |                         |   |   |   |  |  |  |
|         |                        |                      |          |          | 232  | 378  | 247.3165 | 378.0000 |                                                                      |    |    |    |                         |   |   |   |  |  |  |
| FN2022  | 0.690                  | 12.305               | 3.297e-3 | 3.129e-4 | 38   | 72   | 55.5026  | 93.7164  | AAL94112.1  N utilization substance protein A                        |    |    |    |                         |   |   |   |  |  |  |
|         |                        |                      |          |          | 53   | 87   | 56.4990  | 87.0000  |                                                                      |    |    |    |                         |   |   |   |  |  |  |
| FN2023  | 0.044                  | 8.265                | 4.195e-1 | 9.433e-1 | 20   | 12   | 29.2119  | 15.6194  | AAL94113.1  Hypothetical cytosolic protein                           |    |    |    |                         |   |   |   |  |  |  |
|         |                        |                      |          |          | 5    | 20   | 5.3301   | 20.0000  |                                                                      |    |    |    |                         |   |   |   |  |  |  |
| FN2030  | 0.288                  | 10.993               | 2.211e-1 | 3.625e-1 | 18   | 39   | 26.2907  | 50.7630  | AAL94115.1  Inorganic pyrophosphatase                                |    |    |    |                         |   |   |   |  |  |  |
|         |                        |                      |          |          | 52   | 49   | 55.4330  | 49.0000  |                                                                      |    |    |    |                         |   |   |   |  |  |  |
| FN2031  | -0.547                 | 4.547                |          |          | 4    |      | 5.8424   |          | AAL94116.1  Thiamine biosynthesis lipoprotein appE                   |    |    |    |                         |   |   |   |  |  |  |
|         |                        |                      |          |          |      | 4    | 4.0000   |          |                                                                      |    |    |    |                         |   |   |   |  |  |  |
| FN2033  | -0.753                 | 8.154                |          |          | 15   |      | 21.9089  |          | AAL94118.1  Guanylate kinase                                         |    |    |    |                         |   |   |   |  |  |  |
|         |                        |                      |          |          |      | 13   | 13.0000  |          |                                                                      |    |    |    |                         |   |   |   |  |  |  |
| FN2034  | -0.285                 | 8.130                | 2.835e-1 | 5.167e-1 | 18   | 11   | 26.2907  | 14.3178  | AAL94119.1  Protein yicC                                             |    |    |    |                         |   |   |   |  |  |  |
|         |                        |                      |          |          | 10   | 16   | 10.6602  | 16.0000  |                                                                      |    |    |    |                         |   |   |   |  |  |  |
| FN2035  | 0.157                  | 18.004               | 1.824e-1 | 2.683e-1 | 375  | 453  | 547.7233 | 589.6323 | AAL94120.1  DNA-directed RNA polymerase beta' chain                  |    |    |    |                         |   |   |   |  |  |  |
|         |                        |                      |          |          | 397  | 493  | 423.2097 | 493.0000 |                                                                      |    |    |    |                         |   |   |   |  |  |  |

Show detected proteins only  
 Show all proteins  
 Filter by category:

Proteins found:  
1313

Test Cutoff

| Signif | Direction | Applies To   |
|--------|-----------|--------------|
| yes    | +         | ratios, bars |
| no     | n/a       | bars         |
| yes    | -         | ratios, bars |
| yes    | +         | p-, q-Values |
| yes    | -         |              |

Fn Summary Table FnPg vs Fn FnSg vs Fn FnPgSg vs Fn FnPgSg vs FnPg FnSg vs FnPg FnPgSg vs FnSg Fn Coverage

| Protein | FnSg vs FnPg           |                      |          |          | Raw  |      |           |          | Normalized                                              |      |      |      | Description | Log <sub>2</sub> Ratios |    |    |   |   |   |   |
|---------|------------------------|----------------------|----------|----------|------|------|-----------|----------|---------------------------------------------------------|------|------|------|-------------|-------------------------|----|----|---|---|---|---|
|         | Log <sub>2</sub> Ratio | Log <sub>2</sub> Sum | q-Value  | p-Value  | FnPg | FnSg | FnPg      | FnSg     | FnPg                                                    | FnSg | FnPg | FnSg |             |                         |    |    |   |   |   |   |
|         |                        |                      |          |          |      |      |           |          |                                                         |      |      |      |             | -6                      | -4 | -2 | 0 | 2 | 4 | 6 |
| FN2036  | 0.508                  | 17.024               | 6.91e-2  | 4.04e-2  | 163  | 318  | 238.0771  | 413.9141 | AAL94121.1  DNA-directed RNA polymerase beta chain      |      |      |      |             |                         |    |    |   |   |   |   |
|         |                        |                      |          |          | 351  | 457  | 374.1728  | 457.0000 |                                                         |      |      |      |             |                         |    |    |   |   |   |   |
| FN2037  | -0.812                 | 19.372               | 1.645e-1 | 2.249e-1 | 1107 | 315  | 1616.8792 | 410.0092 | AAL94122.1  LSU ribosomal protein L12P (L7/L12)         |      |      |      |             |                         |    |    |   |   |   |   |
|         |                        |                      |          |          | 531  | 833  | 566.0562  | 833.0000 |                                                         |      |      |      |             |                         |    |    |   |   |   |   |
| FN2038  | -0.612                 | 14.809               | 2.041e-1 | 3.221e-1 | 216  | 103  | 315.4886  | 134.0665 | AAL94123.1  LSU ribosomal protein L10P                  |      |      |      |             |                         |    |    |   |   |   |   |
|         |                        |                      |          |          | 97   | 140  | 103.4039  | 140.0000 |                                                         |      |      |      |             |                         |    |    |   |   |   |   |
| FN2039  | -0.039                 | 16.379               | 3.701e-1 | 7.671e-1 | 214  | 252  | 312.5674  | 328.0074 | AAL94124.1  LSU ribosomal protein L1P                   |      |      |      |             |                         |    |    |   |   |   |   |
|         |                        |                      |          |          | 262  | 248  | 279.2971  | 248.0000 |                                                         |      |      |      |             |                         |    |    |   |   |   |   |
| FN2040  | -1.479                 | 10.245               | 9.707e-2 | 8.072e-2 | 57   | 19   | 83.2539   | 24.7307  | AAL94125.1  LSU ribosomal protein L11P                  |      |      |      |             |                         |    |    |   |   |   |   |
|         |                        |                      |          |          | 31   | 17   | 33.0466   | 17.0000  |                                                         |      |      |      |             |                         |    |    |   |   |   |   |
| FN2041  | -1.700                 | 11.086               | 1.258e-1 | 1.312e-1 | 91   | 19   | 132.9142  | 24.7307  | AAL94126.1  Transcription antitermination protein nusG  |      |      |      |             |                         |    |    |   |   |   |   |
|         |                        |                      |          |          | 33   | 27   | 35.1786   | 27.0000  |                                                         |      |      |      |             |                         |    |    |   |   |   |   |
| FN2045  | -0.556                 | 7.969                |          |          |      | 7    |           | 9.1113   | AAL94129.1  Ferric uptake regulation protein            |      |      |      |             |                         |    |    |   |   |   |   |
|         |                        |                      |          |          | 18   | 17   | 19.1883   | 17.0000  |                                                         |      |      |      |             |                         |    |    |   |   |   |   |
| FN2046  | -0.555                 | 8.799                |          |          |      | 16   |           | 20.8259  | AAL94130.1  Acetyltransferase                           |      |      |      |             |                         |    |    |   |   |   |   |
|         |                        |                      |          |          | 24   | 14   | 25.5845   | 14.0000  |                                                         |      |      |      |             |                         |    |    |   |   |   |   |
| FN2047  | 0.301                  | 13.685               | 1.497e-1 | 1.896e-1 | 54   | 92   | 78.8722   | 119.7487 | AAL94131.1  Fusobacterium outer membrane protein family |      |      |      |             |                         |    |    |   |   |   |   |
|         |                        |                      |          |          | 120  | 135  | 127.9223  | 135.0000 |                                                         |      |      |      |             |                         |    |    |   |   |   |   |
| FN2048  | 0.792                  | 16.177               |          |          |      | 180  |           | 234.2910 | AAL94132.1  Outer membrane protein                      |      |      |      |             |                         |    |    |   |   |   |   |
|         |                        |                      |          |          | 194  | 482  | 206.8077  | 482.0000 |                                                         |      |      |      |             |                         |    |    |   |   |   |   |
| FN2049  | -0.525                 | 18.648               | 1.974e-1 | 3.071e-1 | 753  | 430  | 1099.8284 | 559.6951 | AAL94133.1  unknown                                     |      |      |      |             |                         |    |    |   |   |   |   |
|         |                        |                      |          |          | 411  | 509  | 438.1339  | 509.0000 |                                                         |      |      |      |             |                         |    |    |   |   |   |   |
| FN2050  | -2.135                 | 13.336               | 1.251e-1 | 1.297e-1 | 240  | 40   | 350.5429  | 52.0647  | AAL94134.1  Hypothetical membrane-spanning protein      |      |      |      |             |                         |    |    |   |   |   |   |
|         |                        |                      |          |          | 71   | 45   | 75.6874   | 45.0000  |                                                         |      |      |      |             |                         |    |    |   |   |   |   |
| FN2051  | -0.406                 | 12.967               | 2.74e-1  | 4.926e-1 | 106  | 81   | 154.8231  | 105.4309 | AAL94135.1  unknown                                     |      |      |      |             |                         |    |    |   |   |   |   |
|         |                        |                      |          |          | 48   | 50   | 51.1689   | 50.0000  |                                                         |      |      |      |             |                         |    |    |   |   |   |   |
| FN2052  | -0.190                 | 12.637               | 3.647e-1 | 7.496e-1 | 89   | 81   | 129.9930  | 105.4309 | AAL94136.1  unknown                                     |      |      |      |             |                         |    |    |   |   |   |   |
|         |                        |                      |          |          | 38   | 44   | 40.5087   | 44.0000  |                                                         |      |      |      |             |                         |    |    |   |   |   |   |
| FN2053  | -0.362                 | 11.892               | 2.323e-1 | 3.908e-1 | 30   | 49   | 43.8179   | 63.7792  | AAL94137.1  Serine/threonine sodium symporter           |      |      |      |             |                         |    |    |   |   |   |   |
|         |                        |                      |          |          | 90   | 45   | 95.9417   | 45.0000  |                                                         |      |      |      |             |                         |    |    |   |   |   |   |
| FN2054  | -0.452                 | 14.142               | 1.419e-2 | 2.855e-3 | 100  | 96   | 146.0595  | 124.9552 | AAL94138.1  Glucose-6-phosphate isomerase               |      |      |      |             |                         |    |    |   |   |   |   |
|         |                        |                      |          |          | 158  | 105  | 168.4310  | 105.0000 |                                                         |      |      |      |             |                         |    |    |   |   |   |   |

Show detected proteins only  
 Show all proteins  
 Filter by category:

Proteins found: 1313

Test Cutoff

| Signif      | Direction | Applies To |
|-------------|-----------|------------|
| red         | yes       | +          |
| yellow      | no        | n/a        |
| green       | yes       | -          |
| pink        | yes       | +          |
| light green | yes       | -          |

Applies To: ratios, bars; bars; ratios, bars; p-, q-Values



Fn Summary Table FnPg vs Fn FnSg vs Fn FnPgSg vs Fn FnPgSg vs FnPg FnSg vs FnPg FnPgSg vs FnSg Fn Coverage

| Protein | FnSg vs FnPg           |                      |          |          | Raw  |      | Normalized |           | Description                                             | Log <sub>2</sub> Ratios |    |    |   |   |   |   |
|---------|------------------------|----------------------|----------|----------|------|------|------------|-----------|---------------------------------------------------------|-------------------------|----|----|---|---|---|---|
|         | Log <sub>2</sub> Ratio | Log <sub>2</sub> Sum | q-Value  | p-Value  | FnPg | FnSg | FnPg       | FnSg      |                                                         | -6                      | -4 | -2 | 0 | 2 | 4 | 6 |
| FN2058  | -1.728                 | 17.134               | 9.199e-2 | 7.287e-2 | 683  | 155  | 997.5867   | 201.7506  | AAL94142.1  Fusobacterium outer membrane protein family |                         |    |    |   |   |   |   |
|         |                        |                      |          |          | 359  | 215  | 382.7009   | 215.0000  |                                                         |                         |    |    |   |   |   |   |
| FN2059  | 0.792                  | 16.177               |          |          |      | 180  |            | 234.2910  | AAL94143.1  Outer membrane protein                      |                         |    |    |   |   |   |   |
|         |                        |                      |          |          | 194  | 482  | 206.8077   | 482.0000  |                                                         |                         |    |    |   |   |   |   |
| FN2060  | -0.525                 | 18.648               | 1.974e-1 | 3.071e-1 | 753  | 430  | 1099.8284  | 559.6951  | AAL94144.1  unknown                                     |                         |    |    |   |   |   |   |
|         |                        |                      |          |          | 411  | 509  | 438.1339   | 509.0000  |                                                         |                         |    |    |   |   |   |   |
| FN2061  | -2.135                 | 13.336               | 1.251e-1 | 1.297e-1 | 240  | 40   | 350.5429   | 52.0647   | AAL94145.1  Hypothetical membrane-spanning protein      |                         |    |    |   |   |   |   |
|         |                        |                      |          |          | 71   | 45   | 75.6874    | 45.0000   |                                                         |                         |    |    |   |   |   |   |
| FN2062  | -0.406                 | 12.967               | 2.74e-1  | 4.926e-1 | 106  | 81   | 154.8231   | 105.4309  | AAL94146.1  unknown                                     |                         |    |    |   |   |   |   |
|         |                        |                      |          |          | 48   | 50   | 51.1689    | 50.0000   |                                                         |                         |    |    |   |   |   |   |
| FN2063  | -0.190                 | 12.637               | 3.647e-1 | 7.496e-1 | 89   | 81   | 129.9930   | 105.4309  | AAL94147.1  unknown                                     |                         |    |    |   |   |   |   |
|         |                        |                      |          |          | 38   | 44   | 40.5087    | 44.0000   |                                                         |                         |    |    |   |   |   |   |
| FN2067  |                        |                      |          |          |      |      |            |           | AAL94151.1  Thiol:disulfide interchange protein tlpA    |                         |    |    |   |   |   |   |
|         |                        |                      |          |          |      | 6    |            | 6.0000    |                                                         |                         |    |    |   |   |   |   |
| FN2068  | -0.139                 | 8.791                | 3.744e-1 | 7.812e-1 | 12   | 7    | 17.5271    | 9.1113    | AAL94152.1  dGTP triphosphohydrolase                    |                         |    |    |   |   |   |   |
|         |                        |                      |          |          | 25   | 31   | 26.6505    | 31.0000   |                                                         |                         |    |    |   |   |   |   |
| FN2070  | 0.150                  | 7.253                |          |          |      | 10   |            | 13.0162   | AAL94154.1  Cobyric acid synthase                       |                         |    |    |   |   |   |   |
|         |                        |                      |          |          | 11   | 13   | 11.7262    | 13.0000   |                                                         |                         |    |    |   |   |   |   |
| FN2073  | 1.261                  | 11.058               | 5.149e-2 | 2.403e-2 | 8    | 43   | 11.6848    | 55.9695   | AAL94157.1  Adenine phosphoribosyltransferase           |                         |    |    |   |   |   |   |
|         |                        |                      |          |          | 45   | 87   | 47.9709    | 87.0000   |                                                         |                         |    |    |   |   |   |   |
| FN2074  |                        |                      |          |          |      |      |            |           | AAL94158.1  BsIIM                                       |                         |    |    |   |   |   |   |
|         |                        |                      |          |          | 3    |      | 3.1981     |           |                                                         |                         |    |    |   |   |   |   |
| FN2075  | -0.222                 | 8.673                | 3.026e-1 | 5.664e-1 | 16   | 8    | 23.3695    | 10.4129   | AAL94159.1  Hypothetical protein                        |                         |    |    |   |   |   |   |
|         |                        |                      |          |          | 19   | 27   | 20.2544    | 27.0000   |                                                         |                         |    |    |   |   |   |   |
| FN2078  | 1.323                  | 4.677                |          |          |      |      |            |           | AAL94162.1  Transcriptional regulator, DeoR family      |                         |    |    |   |   |   |   |
|         |                        |                      |          |          | 3    | 8    | 3.1981     | 8.0000    |                                                         |                         |    |    |   |   |   |   |
| FN2082  | 0.129                  | 21.217               | 3.573e-1 | 7.257e-1 | 599  | 1156 | 874.8967   | 1504.6687 | AAL94166.1  Formate--tetrahydrofolate ligase            |                         |    |    |   |   |   |   |
|         |                        |                      |          |          | 1981 | 1761 | 2111.7842  | 1761.0000 |                                                         |                         |    |    |   |   |   |   |
| FN2093  | -1.092                 | 8.699                | 1.561e-1 | 2.051e-1 | 32   | 13   | 46.7391    | 16.9210   | AAL94177.1  General secretion pathway protein G         |                         |    |    |   |   |   |   |
|         |                        |                      |          |          | 12   | 11   | 12.7922    | 11.0000   |                                                         |                         |    |    |   |   |   |   |
| FN2098  | 0.662                  | 6.272                | 9.451e-2 | 7.707e-2 | 3    | 7    | 4.3818     | 9.1113    | AAL94182.1  MRP-family nucleotide-binding protein       |                         |    |    |   |   |   |   |
|         |                        |                      |          |          | 9    | 13   | 9.5942     | 13.0000   |                                                         |                         |    |    |   |   |   |   |

Show detected proteins only  
 Show all proteins  
 Filter by category:

Proteins found: 1313

Test Cutoff

| Signif | Direction | Applies To   |
|--------|-----------|--------------|
| yes    | +         | ratios, bars |
| no     | n/a       | bars         |
| yes    | -         | ratios, bars |
| yes    | +         | p-, q-Values |
| yes    | -         | p-, q-Values |

Fn Summary Table FnPg vs Fn FnSg vs Fn FnPgSg vs Fn FnPgSg vs FnPg FnSg vs FnPg FnPgSg vs FnSg Fn Coverage

| Protein | FnSg vs FnPg           |                      |          |          | Raw  |      | Normalized |          | Description                                                    | Log <sub>2</sub> Ratios |    |    |   |   |   |   |
|---------|------------------------|----------------------|----------|----------|------|------|------------|----------|----------------------------------------------------------------|-------------------------|----|----|---|---|---|---|
|         | Log <sub>2</sub> Ratio | Log <sub>2</sub> Sum | q-Value  | p-Value  | FnPg | FnSg | FnPg       | FnSg     |                                                                |                         |    |    |   |   |   |   |
|         |                        |                      |          |          |      |      |            |          |                                                                | -6                      | -4 | -2 | 0 | 2 | 4 | 6 |
| FN2100  | -0.254                 | 9.886                | 1.564e-1 | 2.059e-1 | 19   | 21   | 27.7513    | 27.3339  | AAL94184.1  Hypothetical protein                               |                         |    |    |   |   |   |   |
|         |                        |                      |          |          | 37   | 29   | 39.4427    | 29.0000  |                                                                |                         |    |    |   |   |   |   |
| FN2102  | 0.540                  | 8.807                | 1.079e-1 | 9.792e-2 | 16   | 20   | 23.3695    | 26.0323  | AAL94186.1  ABC transporter ATP-binding protein                |                         |    |    |   |   |   |   |
|         |                        |                      |          |          | 11   | 25   | 11.7262    | 25.0000  |                                                                |                         |    |    |   |   |   |   |
| FN2103  | 0.094                  | 19.117               | 3.212e-1 | 6.177e-1 | 598  | 651  | 873.4361   | 847.3524 | AAL94187.1  tricarboxylate-binding protein                     |                         |    |    |   |   |   |   |
|         |                        |                      |          |          | 550  | 711  | 586.3106   | 711.0000 |                                                                |                         |    |    |   |   |   |   |
| FN2105  |                        |                      |          |          |      |      |            |          | AAL94189.1  tricarboxylate transport membrane protein RctA     |                         |    |    |   |   |   |   |
|         |                        |                      |          |          | 7    |      | 7.4621     |          |                                                                |                         |    |    |   |   |   |   |
| FN2106  | -1.009                 | 14.761               | 1.525e-1 | 1.965e-1 | 247  | 96   | 360.7671   | 124.9552 | AAL94190.1  Transporter                                        |                         |    |    |   |   |   |   |
|         |                        |                      |          |          | 105  | 110  | 111.9320   | 110.0000 |                                                                |                         |    |    |   |   |   |   |
| FN2107  | -1.441                 | 8.730                | 1.394e-1 | 1.617e-1 | 37   | 10   | 54.0420    | 13.0162  | AAL94191.1  Galactokinase                                      |                         |    |    |   |   |   |   |
|         |                        |                      |          |          | 13   | 12   | 13.8583    | 12.0000  |                                                                |                         |    |    |   |   |   |   |
| FN2108  | -0.407                 | 8.889                | 4.741e-2 | 2.051e-2 | 19   | 16   | 27.7513    | 20.8259  | AAL94192.1  Galactose-1-phosphate uridylyltransferase          |                         |    |    |   |   |   |   |
|         |                        |                      |          |          | 21   | 17   | 22.3864    | 17.0000  |                                                                |                         |    |    |   |   |   |   |
| FN2109  | -0.530                 | 12.060               | 7.629e-2 | 4.895e-2 | 63   | 39   | 92.0175    | 50.7630  | AAL94193.1  UDP-glucose 4-epimerase                            |                         |    |    |   |   |   |   |
|         |                        |                      |          |          | 61   | 58   | 65.0272    | 58.0000  |                                                                |                         |    |    |   |   |   |   |
| FN2116  | -1.156                 | 8.316                |          |          |      | 13   |            | 16.9210  | AAL94200.1  Hypothetical exported 24-amino acid repeat protein |                         |    |    |   |   |   |   |
|         |                        |                      |          |          | 25   | 7    | 26.6505    | 7.0000   |                                                                |                         |    |    |   |   |   |   |
| FN2117  | 0.493                  | 5.847                |          |          |      |      |            |          | AAL94201.1  Hypothetical exported 24-amino acid repeat protein |                         |    |    |   |   |   |   |
|         |                        |                      |          |          | 6    | 9    | 6.3961     | 9.0000   |                                                                |                         |    |    |   |   |   |   |
| FN2118  | -0.315                 | 5.485                |          |          |      |      |            |          | AAL94202.1  Hypothetical exported 24-amino acid repeat protein |                         |    |    |   |   |   |   |
|         |                        |                      |          |          | 7    | 6    | 7.4621     | 6.0000   |                                                                |                         |    |    |   |   |   |   |
| FN2119  | -1.170                 | 9.511                |          |          |      | 10   |            | 13.0162  | AAL94203.1  Hypothetical exported 24-amino acid repeat protein |                         |    |    |   |   |   |   |
|         |                        |                      |          |          | 38   | 23   | 40.5087    | 23.0000  |                                                                |                         |    |    |   |   |   |   |
| FN2121  | -2.588                 | 9.992                |          |          | 94   | 10   | 137.2960   | 13.0162  | AAL94205.1  Hypothetical exported 24-amino acid repeat protein |                         |    |    |   |   |   |   |
|         |                        |                      |          |          | 18   |      | 19.1883    |          |                                                                |                         |    |    |   |   |   |   |
| FN2122  | -0.355                 | 17.257               | 1.096e-1 | 1.008e-1 | 356  | 275  | 519.9720   | 357.9446 | AAL94206.1  Phenylalanyl-tRNA synthetase beta chain            |                         |    |    |   |   |   |   |
|         |                        |                      |          |          | 352  | 342  | 375.2388   | 342.0000 |                                                                |                         |    |    |   |   |   |   |
| FN2123  | 0.160                  | 13.580               | 3.568e-1 | 7.243e-1 | 39   | 66   | 56.9632    | 85.9067  | AAL94207.1  Phenylalanyl-tRNA synthetase alpha chain           |                         |    |    |   |   |   |   |
|         |                        |                      |          |          | 143  | 148  | 152.4408   | 148.0000 |                                                                |                         |    |    |   |   |   |   |
| FN2125  | -0.254                 | 12.696               | 3.099e-1 | 5.864e-1 | 89   | 57   | 129.9930   | 74.1921  | AAL94209.1  DNA gyrase subunit A                               |                         |    |    |   |   |   |   |
|         |                        |                      |          |          | 45   | 75   | 47.9709    | 75.0000  |                                                                |                         |    |    |   |   |   |   |

Show detected proteins only  
 Show all proteins  
 Filter by category:

Proteins found: 1313

Test Cutoff

| Signif | Direction | Applies To   |
|--------|-----------|--------------|
| yes    | +         | ratios, bars |
| no     | n/a       | bars         |
| yes    | -         | ratios, bars |
| yes    | +         | p-, q-Values |
| yes    | -         | p-, q-Values |

Fn Summary Table

FnPg vs Fn

FnSg vs Fn

FnPgSg vs Fn

FnPgSg vs FnPg

FnSg vs FnPg

FnPgSg vs FnSg

Fn Coverage

FnSg vs FnPg

Raw

Normalized

Log<sub>2</sub> Ratios

| Protein | FnSg vs FnPg           |                      |          |         | Raw  |      | Normalized |         | Description                      | Log <sub>2</sub> Ratios |    |    |   |   |   |   |
|---------|------------------------|----------------------|----------|---------|------|------|------------|---------|----------------------------------|-------------------------|----|----|---|---|---|---|
|         | Log <sub>2</sub> Ratio | Log <sub>2</sub> Sum | q-Value  | p-Value | FnPg | FnSg | FnPg       | FnSg    |                                  | -6                      | -4 | -2 | 0 | 2 | 4 | 6 |
| FN2126  | -0.272                 | 9.756                | 2.109e-1 | 3.38e-1 | 26   | 15   | 37.9755    | 19.5242 | AAL94210.1  DNA gyrase subunit B |                         |    |    |   |   |   |   |
|         |                        |                      |          |         | 25   | 34   | 26.6505    | 34.0000 |                                  |                         |    |    |   |   |   |   |

- Show detected proteins only
- Show all proteins

Proteins found:  
1313

Filter by category:

GO: amino acid transport

Enter (or paste) list of ORFs

Find ORFs

Test

Cutoff

q-Value

p-Value

.005

|             | Signif | Direction | Applies To   |
|-------------|--------|-----------|--------------|
| red         | yes    | +         | ratios, bars |
| yellow      | no     | n/a       | bars         |
| green       | yes    | -         | ratios, bars |
| pink        | yes    | +         | p-, q-Values |
| light green | yes    | -         | p-, q-Values |

Dot Plots

Dot Plots
