# Supplementary material for: Proteomics of Fusobacterium nucleatum within a model developing oral microbial community
Source: PubMed Central journal article supplement (PMC4234264; doi:10.1002/mbo3.204), 2014-08-25
Supplement: mbo30003-0729-sd8.pdf [file mbo30003-0729-sd8.pdf]

Fn Summary Table FnPg vs Fn FnSg vs Fn FnPgSg vs Fn FnPgSg vs FnPg FnSg vs FnPg FnPgSg vs FnSg Fn Coverage

| Protein | FnPgSg vs FnSg         |                      |          |          | Raw    |      | Normalized |         | Description                                                    | Log <sub>2</sub> Ratios |    |    |   |   |   |   |
|---------|------------------------|----------------------|----------|----------|--------|------|------------|---------|----------------------------------------------------------------|-------------------------|----|----|---|---|---|---|
|         | Log <sub>2</sub> Ratio | Log <sub>2</sub> Sum | q-Value  | p-Value  | FnPgSg | FnSg | FnPgSg     | FnSg    |                                                                | -6                      | -4 | -2 | 0 | 2 | 4 | 6 |
| FN0001  | -1.275                 | 6.541                | 7.573e-4 | 1.334e-3 | 7      | 10   | 8.0083     | 13.0162 | AAL94214.1  Chromosomal replication initiator protein dnaA     |                         |    |    |   |   |   |   |
|         |                        |                      |          |          | 3      | 17   | 4.3974     | 17.0000 |                                                                |                         |    |    |   |   |   |   |
| FN0004  | 1.784                  | 12.338               | 4.439e-3 | 1.286e-2 | 145    | 35   | 165.8869   | 45.5566 | AAL94217.1  Inner membrane protein                             |                         |    |    |   |   |   |   |
|         |                        |                      |          |          | 69     | 32   | 101.1401   | 32.0000 |                                                                |                         |    |    |   |   |   |   |
| FN0005  | 1.595                  | 10.422               | 8.613e-5 | 7.124e-5 | 60     | 12   | 68.6428    | 15.6194 | AAL94218.1  Jag protein                                        |                         |    |    |   |   |   |   |
|         |                        |                      |          |          | 41     | 27   | 60.0977    | 27.0000 |                                                                |                         |    |    |   |   |   |   |
| FN0006  | -1.186                 | 8.562                | 7.973e-6 | 1.958e-6 | 11     | 22   | 12.5845    | 28.6356 | AAL94219.1  Thiophene and furan oxidation protein THDF         |                         |    |    |   |   |   |   |
|         |                        |                      |          |          | 9      | 30   | 13.1922    | 30.0000 |                                                                |                         |    |    |   |   |   |   |
| FN0007  | -0.696                 | 7.157                | 2.992e-2 | 1.242e-1 | 10     | 8    | 11.4405    | 10.4129 | AAL94220.1  Glucose inhibited division protein A               |                         |    |    |   |   |   |   |
|         |                        |                      |          |          | 5      | 20   | 7.3290     | 20.0000 |                                                                |                         |    |    |   |   |   |   |
| FN0008  |                        |                      |          |          |        |      |            | 7.8097  | AAL94221.1  Quinolinate synthetase A                           |                         |    |    |   |   |   |   |
|         |                        |                      |          |          |        |      |            | 11.0000 |                                                                |                         |    |    |   |   |   |   |
| FN0009  |                        |                      |          |          |        |      |            |         | AAL94222.1  L-aspartate oxidase                                |                         |    |    |   |   |   |   |
|         |                        |                      |          |          |        |      |            | 25.0000 |                                                                |                         |    |    |   |   |   |   |
| FN0017  |                        |                      |          |          |        |      |            | 5.2065  | AAL94230.1  Hypothetical protein                               |                         |    |    |   |   |   |   |
|         |                        |                      |          |          |        |      |            | 7.0000  |                                                                |                         |    |    |   |   |   |   |
| FN0018  | 0.749                  | 9.945                | 1.226e-4 | 1.125e-4 | 34     | 18   | 38.8976    | 23.4291 | AAL94231.1  Hypothetical protein                               |                         |    |    |   |   |   |   |
|         |                        |                      |          |          | 29     | 25   | 42.5082    | 25.0000 |                                                                |                         |    |    |   |   |   |   |
| FN0019  | -0.010                 | 5.114                |          |          |        | 6    |            | 7.8097  | AAL94232.1  Transcription-repair coupling factor               |                         |    |    |   |   |   |   |
|         |                        |                      |          |          | 4      | 4    | 5.8632     | 4.0000  |                                                                |                         |    |    |   |   |   |   |
| FN0022  | 1.713                  | 9.048                | 4.072e-3 | 1.141e-2 | 28     | 8    | 32.0333    | 10.4129 | AAL94235.1  Hypothetical protein                               |                         |    |    |   |   |   |   |
|         |                        |                      |          |          | 35     | 15   | 51.3030    | 15.0000 |                                                                |                         |    |    |   |   |   |   |
| FN0023  | -0.033                 | 7.781                |          |          |        |      |            |         | AAL94236.1  Short-chain fatty acids transporter                |                         |    |    |   |   |   |   |
|         |                        |                      |          |          | 10     | 15   | 14.6580    | 15.0000 |                                                                |                         |    |    |   |   |   |   |
| FN0024  | 0.788                  | 9.128                |          |          |        |      |            | 34.3214 | AAL94237.1  Hypothetical exported 24-amino acid repeat protein |                         |    |    |   |   |   |   |
|         |                        |                      |          |          | 30     | 18   | 27.8502    | 18.0000 |                                                                |                         |    |    |   |   |   |   |
| FN0025  | 0.359                  | 6.359                |          |          |        |      |            |         | AAL94238.1  Hypothetical exported 24-amino acid repeat protein |                         |    |    |   |   |   |   |
|         |                        |                      |          |          | 7      | 8    | 10.2606    | 8.0000  |                                                                |                         |    |    |   |   |   |   |
| FN0026  |                        |                      |          |          |        |      |            | 45.7619 | AAL94239.1  Hypothetical exported 24-amino acid repeat protein |                         |    |    |   |   |   |   |
|         |                        |                      |          |          | 40     |      | 29.3160    |         |                                                                |                         |    |    |   |   |   |   |
| FN0029  |                        |                      |          |          |        |      |            | 5.7202  | AAL94242.1  Flavodoxin                                         |                         |    |    |   |   |   |   |
|         |                        |                      |          |          | 5      |      |            |         |                                                                |                         |    |    |   |   |   |   |

Show detected proteins only  
 Show all proteins  
 Filter by category:

Proteins found: 1344

Enter (or paste) list of ORFs

Find ORFs

Test Cutoff

q-Value

p-Value

.005

| Signif | Direction | Applies To   |
|--------|-----------|--------------|
| yes    | +         | ratios, bars |
| no     | n/a       | bars         |
| yes    | -         | ratios, bars |
| yes    | +         | p-, q-Values |
| yes    | -         | p-, q-Values |

Dot Plots Dot Plots

Fn Summary Table FnPg vs Fn FnSg vs Fn FnPgSg vs Fn FnPgSg vs FnPg FnSg vs FnPg FnPgSg vs FnSg Fn Coverage

| Protein | FnPgSg vs FnSg         |                      |          |          | Raw    |      | Normalized |          | Description                                                              | Log <sub>2</sub> Ratios |    |    |   |   |   |   |
|---------|------------------------|----------------------|----------|----------|--------|------|------------|----------|--------------------------------------------------------------------------|-------------------------|----|----|---|---|---|---|
|         | Log <sub>2</sub> Ratio | Log <sub>2</sub> Sum | q-Value  | p-Value  | FnPgSg | FnSg | FnPgSg     | FnSg     |                                                                          | -6                      | -4 | -2 | 0 | 2 | 4 | 6 |
| FN0030  | -0.799                 | 12.726               | 5.533e-4 | 8.615e-4 | 63     | 90   | 72.0750    | 117.1455 | AAL94243.1  5-nitroimidazole antibiotic resistance protein               |                         |    |    |   |   |   |   |
|         |                        |                      |          |          | 36     | 100  | 52.7687    | 100.0000 |                                                                          |                         |    |    |   |   |   |   |
| FN0031  | -1.142                 | 8.147                | 1.66e-3  | 3.674e-3 | 7      | 20   | 8.0083     | 26.0323  | AAL94244.1  unknown                                                      |                         |    |    |   |   |   |   |
|         |                        |                      |          |          | 10     | 24   | 14.6580    | 24.0000  |                                                                          |                         |    |    |   |   |   |   |
| FN0033  | -0.633                 | 11.958               | 1.07e-6  | 1.34e-7  | 45     | 60   | 51.4821    | 78.0970  | AAL94246.1  unknown                                                      |                         |    |    |   |   |   |   |
|         |                        |                      |          |          | 34     | 79   | 49.8372    | 79.0000  |                                                                          |                         |    |    |   |   |   |   |
| FN0034  | 1.319                  | 9.755                | 6.41e-4  | 1.067e-3 | 44     | 14   | 50.3381    | 18.2226  | AAL94247.1  unknown                                                      |                         |    |    |   |   |   |   |
|         |                        |                      |          |          | 29     | 19   | 42.5082    | 19.0000  |                                                                          |                         |    |    |   |   |   |   |
| FN0039  |                        |                      |          |          |        | 13   |            | 16.9210  | AAL94252.1  DNA primase (bacterial type) and small primase-like proteins |                         |    |    |   |   |   |   |
|         |                        |                      |          |          |        | 16   |            | 16.0000  |                                                                          |                         |    |    |   |   |   |   |
| FN0040  | -0.539                 | 18.495               | 1.488e-5 | 5.633e-6 | 424    | 549  | 485.0761   | 714.5875 | AAL94253.1  Asparaginyl-tRNA synthetase                                  |                         |    |    |   |   |   |   |
|         |                        |                      |          |          | 357    | 751  | 523.2901   | 751.0000 |                                                                          |                         |    |    |   |   |   |   |
| FN0041  |                        |                      |          |          | 4      |      | 4.5762     |          | AAL94254.1  unknown                                                      |                         |    |    |   |   |   |   |
|         |                        |                      |          |          | 8      |      | 11.7264    |          |                                                                          |                         |    |    |   |   |   |   |
| FN0043  |                        |                      |          |          | 4      |      | 4.5762     |          | AAL94256.1  Hypothetical exported 24-amino acid repeat protein           |                         |    |    |   |   |   |   |
|         |                        |                      |          |          |        |      |            |          |                                                                          |                         |    |    |   |   |   |   |
| FN0045  |                        |                      |          |          |        | 7    |            | 7.0000   | AAL94258.1  Shikimate 5-dehydrogenase                                    |                         |    |    |   |   |   |   |
|         |                        |                      |          |          |        |      |            |          |                                                                          |                         |    |    |   |   |   |   |
| FN0046  |                        |                      |          |          | 8      |      | 11.7264    |          | AAL94259.1  3-dehydroquininate dehydratase                               |                         |    |    |   |   |   |   |
|         |                        |                      |          |          |        |      |            |          |                                                                          |                         |    |    |   |   |   |   |
| FN0047  | 0.298                  | 12.263               | 7.296e-5 | 5.701e-5 | 68     | 48   | 77.7952    | 62.4776  | AAL94260.1  Exodeoxyribonuclease III                                     |                         |    |    |   |   |   |   |
|         |                        |                      |          |          | 53     | 64   | 77.6873    | 64.0000  |                                                                          |                         |    |    |   |   |   |   |
| FN0048  | -0.470                 | 8.802                | 1.982e-5 | 9.147e-6 | 16     | 19   | 18.3048    | 24.7307  | AAL94261.1  4-nitrophenylphosphatase                                     |                         |    |    |   |   |   |   |
|         |                        |                      |          |          | 12     | 25   | 17.5896    | 25.0000  |                                                                          |                         |    |    |   |   |   |   |
| FN0049  |                        |                      |          |          |        | 40   |            | 52.0647  | AAL94262.1  Hypothetical protein                                         |                         |    |    |   |   |   |   |
|         |                        |                      |          |          |        | 67   |            | 67.0000  |                                                                          |                         |    |    |   |   |   |   |
| FN0050  | 2.598                  | 18.078               | 2.221e-3 | 5.272e-3 | 906    | 151  | 1036.5069  | 196.5441 | AAL94263.1  Fumarate reductase flavoprotein subunit                      |                         |    |    |   |   |   |   |
|         |                        |                      |          |          | 1059   | 231  | 1552.2807  | 231.0000 |                                                                          |                         |    |    |   |   |   |   |
| FN0052  |                        |                      |          |          | 21     |      | 24.0250    |          | AAL94265.1  Arsenate reductase                                           |                         |    |    |   |   |   |   |
|         |                        |                      |          |          | 21     |      | 30.7818    |          |                                                                          |                         |    |    |   |   |   |   |
| FN0054  | 0.484                  | 15.149               | 1.567e-4 | 1.577e-4 | 193    | 124  | 220.8011   | 161.4005 | AAL94267.1  Tyrosyl-tRNA synthetase                                      |                         |    |    |   |   |   |   |
|         |                        |                      |          |          | 157    | 161  | 230.1304   | 161.0000 |                                                                          |                         |    |    |   |   |   |   |

Show detected proteins only  
 Show all proteins  
 Filter by category:

Proteins found: 1344

Enter (or paste) list of ORFs

Find ORFs

Test Cutoff

q-Value p-Value

.005

| Signif | Direction | Applies To   |
|--------|-----------|--------------|
| yes    | +         | ratios, bars |
| no     | n/a       | bars         |
| yes    | -         | ratios, bars |
| yes    | +         | p-, q-Values |
| yes    | -         | p-, q-Values |

Dot Plots Dot Plots

Fn Summary Table FnPg vs Fn FnSg vs Fn FnPgSg vs Fn FnPgSg vs FnPg FnSg vs FnPg FnPgSg vs FnSg Fn Coverage

| Protein | FnPgSg vs FnSg         |                      |          |          | Raw    |      | Normalized |          | Description                                                                     | Log <sub>2</sub> Ratios |    |    |   |   |   |   |
|---------|------------------------|----------------------|----------|----------|--------|------|------------|----------|---------------------------------------------------------------------------------|-------------------------|----|----|---|---|---|---|
|         | Log <sub>2</sub> Ratio | Log <sub>2</sub> Sum | q-Value  | p-Value  | FnPgSg | FnSg | FnPgSg     | FnSg     |                                                                                 | -6                      | -4 | -2 | 0 | 2 | 4 | 6 |
| FN0058  | -1.200                 | 14.906               | 2.644e-2 | 1.08e-1  | 106    | 116  | 121.2690   | 150.9875 | AAL94271.1  Cysteine desulfhydrase                                              |                         |    |    |   |   |   |   |
|         |                        |                      |          |          | 75     | 380  | 109.9349   | 380.0000 |                                                                                 |                         |    |    |   |   |   |   |
| FN0059  | -0.055                 | 11.061               | 1.66e-1  | 8.61e-1  | 37     | 24   | 42.3298    | 31.2388  | AAL94272.1  NifU protein                                                        |                         |    |    |   |   |   |   |
|         |                        |                      |          |          | 33     | 63   | 48.3714    | 63.0000  |                                                                                 |                         |    |    |   |   |   |   |
| FN0060  | 1.643                  | 7.258                |          |          | 19     |      | 21.7369    |          | AAL94273.1  D-alanyl-D-alanine carboxypeptidase                                 |                         |    |    |   |   |   |   |
|         |                        |                      |          |          | 15     | 7    | 21.9870    | 7.0000   |                                                                                 |                         |    |    |   |   |   |   |
| FN0061  | 0.012                  | 12.899               | 1.725e-1 | 9.02e-1  | 74     | 60   | 84.6595    | 78.0970  | AAL94274.1  Thermostable carboxypeptidase 1                                     |                         |    |    |   |   |   |   |
|         |                        |                      |          |          | 62     | 96   | 90.8795    | 96.0000  |                                                                                 |                         |    |    |   |   |   |   |
| FN0062  |                        |                      |          |          | 13     |      | 14.8726    |          | AAL94275.1  Hypothetical cytosolic protein                                      |                         |    |    |   |   |   |   |
|         |                        |                      |          |          | 11     |      | 16.1238    |          |                                                                                 |                         |    |    |   |   |   |   |
| FN0063  |                        |                      |          |          |        |      |            |          | AAL94276.1  unknown                                                             |                         |    |    |   |   |   |   |
|         |                        |                      |          |          |        | 24   |            | 24.0000  |                                                                                 |                         |    |    |   |   |   |   |
| FN0065  | 0.141                  | 13.499               | 7.609e-2 | 3.562e-1 | 95     | 66   | 108.6845   | 85.9067  | AAL94278.1  Transcription accessory protein (S1 RNA binding domain)             |                         |    |    |   |   |   |   |
|         |                        |                      |          |          | 80     | 119  | 117.2639   | 119.0000 |                                                                                 |                         |    |    |   |   |   |   |
| FN0066  |                        |                      |          |          |        |      |            |          | AAL94279.1  Two component system histidine kinase                               |                         |    |    |   |   |   |   |
|         |                        |                      |          |          |        | 5    |            | 5.0000   |                                                                                 |                         |    |    |   |   |   |   |
| FN0067  | 0.746                  | 16.538               | 2.253e-5 | 1.099e-5 | 341    | 180  | 390.1202   | 234.2910 | AAL94280.1  Isoleucyl-tRNA synthetase                                           |                         |    |    |   |   |   |   |
|         |                        |                      |          |          | 279    | 242  | 408.9578   | 242.0000 |                                                                                 |                         |    |    |   |   |   |   |
| FN0069  | -0.066                 | 15.009               | 1.227e-1 | 6.048e-1 | 163    | 161  | 186.4797   | 209.5603 | AAL94282.1  Glycyl-tRNA synthetase alpha chain                                  |                         |    |    |   |   |   |   |
|         |                        |                      |          |          | 115    | 162  | 168.5668   | 162.0000 |                                                                                 |                         |    |    |   |   |   |   |
| FN0070  | -0.528                 | 17.629               | 5.561e-4 | 8.676e-4 | 326    | 432  | 372.9594   | 562.2984 | AAL94283.1  Glycyl-tRNA synthetase beta chain                                   |                         |    |    |   |   |   |   |
|         |                        |                      |          |          | 257    | 519  | 376.7102   | 519.0000 |                                                                                 |                         |    |    |   |   |   |   |
| FN0071  |                        |                      |          |          |        | 7    |            | 9.1113   | AAL94284.1  GTP cyclohydrolase I                                                |                         |    |    |   |   |   |   |
|         |                        |                      |          |          |        |      |            |          |                                                                                 |                         |    |    |   |   |   |   |
| FN0072  | -1.103                 | 13.105               | 8.499e-5 | 6.994e-5 | 53     | 100  | 60.6345    | 130.1617 | AAL94285.1  2-amino-4-hydroxy-6-hydroxymethyldihydropteridine pyrophosphokinase |                         |    |    |   |   |   |   |
|         |                        |                      |          |          | 46     | 145  | 67.4267    | 145.0000 |                                                                                 |                         |    |    |   |   |   |   |
| FN0073  | -0.496                 | 9.342                | 5.559e-2 | 2.512e-1 | 17     | 15   | 19.4488    | 19.5242  | AAL94286.1  Dihydropteroate synthase                                            |                         |    |    |   |   |   |   |
|         |                        |                      |          |          | 16     | 41   | 23.4528    | 41.0000  |                                                                                 |                         |    |    |   |   |   |   |
| FN0074  | -0.476                 | 7.784                |          |          | 11     | 10   | 12.5845    | 13.0162  | AAL94287.1  Ethanolamine utilization protein eutS                               |                         |    |    |   |   |   |   |
|         |                        |                      |          |          |        | 22   |            | 22.0000  |                                                                                 |                         |    |    |   |   |   |   |
| FN0077  |                        |                      |          |          |        |      |            |          | AAL94290.1  Ethanolamine two-component sensor kinase                            |                         |    |    |   |   |   |   |
|         |                        |                      |          |          |        | 13   |            | 13.0000  |                                                                                 |                         |    |    |   |   |   |   |

Show detected proteins only  
 Show all proteins  
 Filter by category:

Proteins found: 1344

Test Cutoff

| Signif | Direction | Applies To   |
|--------|-----------|--------------|
| yes    | +         | ratios, bars |
| no     | n/a       | bars         |
| yes    | -         | ratios, bars |
| yes    | +         | p-, q-Values |
| yes    | -         | p-, q-Values |

Fn Summary Table FnPg vs Fn FnSg vs Fn FnPgSg vs Fn FnPgSg vs FnPg FnSg vs FnPg FnPgSg vs FnSg Fn Coverage

| Protein | FnPgSg vs FnSg         |                      |          |          | Raw    |      | Normalized |          | Description                                                  | Log <sub>2</sub> Ratios |    |    |   |   |   |   |
|---------|------------------------|----------------------|----------|----------|--------|------|------------|----------|--------------------------------------------------------------|-------------------------|----|----|---|---|---|---|
|         | Log <sub>2</sub> Ratio | Log <sub>2</sub> Sum | q-Value  | p-Value  | FnPgSg | FnSg | FnPgSg     | FnSg     |                                                              | -6                      | -4 | -2 | 0 | 2 | 4 | 6 |
| FN0078  | -1.646                 | 7.365                | 7.87e-5  | 6.302e-5 | 5      | 18   | 5.7202     | 23.4291  | AAL94291.1  Ethanolamine utilization protein eutA            |                         |    |    |   |   |   |   |
|         |                        |                      |          |          | 6      | 22   | 8.7948     | 22.0000  |                                                              |                         |    |    |   |   |   |   |
| FN0079  | -2.629                 | 12.764               | 5.808e-5 | 4.252e-5 | 33     | 169  | 37.7536    | 219.9732 | AAL94292.1  Ethanolamine ammonia-lyase heavy chain           |                         |    |    |   |   |   |   |
|         |                        |                      |          |          | 20     | 195  | 29.3160    | 195.0000 |                                                              |                         |    |    |   |   |   |   |
| FN0080  | -1.112                 | 13.153               | 5.42e-4  | 8.365e-4 | 52     | 118  | 59.4905    | 153.5908 | AAL94293.1  Ethanolamine ammonia-lyase light chain           |                         |    |    |   |   |   |   |
|         |                        |                      |          |          | 48     | 127  | 70.3583    | 127.0000 |                                                              |                         |    |    |   |   |   |   |
| FN0081  | -2.964                 | 13.242               | 1.679e-3 | 3.728e-3 | 27     | 172  | 30.8893    | 223.8780 | AAL94294.1  Ethanolamine utilization protein eutL            |                         |    |    |   |   |   |   |
|         |                        |                      |          |          | 27     | 326  | 39.5766    | 326.0000 |                                                              |                         |    |    |   |   |   |   |
| FN0082  | -0.809                 | 9.763                | 2.699e-2 | 1.106e-1 | 21     | 20   | 24.0250    | 26.0323  | AAL94295.1  Ethanolamine utilization protein eutM            |                         |    |    |   |   |   |   |
|         |                        |                      |          |          | 14     | 52   | 20.5212    | 52.0000  |                                                              |                         |    |    |   |   |   |   |
| FN0083  | -1.643                 | 14.280               | 1.247e-3 | 2.574e-3 | 78     | 164  | 89.2357    | 213.4651 | AAL94296.1  Ethanolamine utilization protein eutM precursor  |                         |    |    |   |   |   |   |
|         |                        |                      |          |          | 48     | 285  | 70.3583    | 285.0000 |                                                              |                         |    |    |   |   |   |   |
| FN0084  | -0.719                 | 9.798                | 4.306e-3 | 1.232e-2 | 24     | 25   | 27.4571    | 32.5404  | AAL94297.1  Acetaldehyde dehydrogenase (acetylating)         |                         |    |    |   |   |   |   |
|         |                        |                      |          |          | 13     | 44   | 19.0554    | 44.0000  |                                                              |                         |    |    |   |   |   |   |
| FN0087  |                        |                      |          |          |        |      |            |          | AAL94300.1  Ethanolamine utilization protein eutN            |                         |    |    |   |   |   |   |
|         |                        |                      |          |          |        | 5    |            | 5.0000   |                                                              |                         |    |    |   |   |   |   |
| FN0088  |                        |                      |          |          |        |      |            |          | AAL94301.1  Hypothetical protein                             |                         |    |    |   |   |   |   |
|         |                        |                      |          |          |        | 9    |            | 9.0000   |                                                              |                         |    |    |   |   |   |   |
| FN0089  |                        |                      |          |          | 4      |      | 4.5762     |          | AAL94302.1  Ethanolamine permease                            |                         |    |    |   |   |   |   |
|         |                        |                      |          |          |        |      |            |          |                                                              |                         |    |    |   |   |   |   |
| FN0090  |                        |                      |          |          |        | 7    |            | 9.1113   | AAL94303.1  Ethanolamine utilization protein eutQ            |                         |    |    |   |   |   |   |
|         |                        |                      |          |          |        | 4    |            | 4.0000   |                                                              |                         |    |    |   |   |   |   |
| FN0092  | -2.611                 | 9.423                | 1.505e-6 | 2e-7     | 7      | 48   | 8.0083     | 62.4776  | AAL94305.1  NADPH-dependent butanol dehydrogenase            |                         |    |    |   |   |   |   |
|         |                        |                      |          |          | 9      | 67   | 13.1922    | 67.0000  |                                                              |                         |    |    |   |   |   |   |
| FN0093  | 1.871                  | 15.159               | 1.909e-5 | 8.535e-6 | 305    | 83   | 348.9344   | 108.0342 | AAL94306.1  Thioredoxin                                      |                         |    |    |   |   |   |   |
|         |                        |                      |          |          | 261    | 92   | 382.5734   | 92.0000  |                                                              |                         |    |    |   |   |   |   |
| FN0100  | 1.100                  | 8.579                | 1.371e-4 | 1.308e-4 | 27     | 9    | 30.8893    | 11.7145  | AAL94309.1  Flavodoxins/hemoproteins                         |                         |    |    |   |   |   |   |
|         |                        |                      |          |          | 18     | 15   | 26.3844    | 15.0000  |                                                              |                         |    |    |   |   |   |   |
| FN0102  |                        |                      |          |          | 5      |      | 5.7202     |          | AAL94311.1  Ribonucleoside-diphosphate reductase alpha chain |                         |    |    |   |   |   |   |
|         |                        |                      |          |          | 8      |      | 11.7264    |          |                                                              |                         |    |    |   |   |   |   |
| FN0103  |                        |                      |          |          | 4      |      | 4.5762     |          | AAL94312.1  Ribonucleoside-diphosphate reductase beta chain  |                         |    |    |   |   |   |   |
|         |                        |                      |          |          |        |      |            |          |                                                              |                         |    |    |   |   |   |   |

Show detected proteins only  
 Show all proteins  
 Filter by category:

Proteins found: 1344

Enter (or paste) list of ORFs

Find ORFs

Test Cutoff

q-Value p-Value

.005

| Signif | Direction | Applies To   |
|--------|-----------|--------------|
| yes    | +         | ratios, bars |
| no     | n/a       | bars         |
| yes    | -         | ratios, bars |
| yes    | +         | p-, q-Values |
| yes    | -         | p-, q-Values |

Dot Plots Dot Plots

Fn Summary Table

FnPg vs Fn

FnSg vs Fn

FnPgSg vs Fn

FnPgSg vs FnPg

FnSg vs FnPg

FnPgSg vs FnSg

Fn Coverage

| Protein | FnPgSg vs FnSg         |                      |          |          | Raw    |      | Normalized |           | Description                                               | Log <sub>2</sub> Ratios |    |    |   |   |   |   |
|---------|------------------------|----------------------|----------|----------|--------|------|------------|-----------|-----------------------------------------------------------|-------------------------|----|----|---|---|---|---|
|         | Log <sub>2</sub> Ratio | Log <sub>2</sub> Sum | q-Value  | p-Value  | FnPgSg | FnSg | FnPgSg     | FnSg      |                                                           | -6                      | -4 | -2 | 0 | 2 | 4 | 6 |
| FN0106  | 0.044                  | 13.655               | 1.123e-1 | 5.472e-1 | 94     | 82   | 107.5405   | 106.7326  | AAL94315.1  Hypothetical protein                          |                         |    |    |   |   |   |   |
|         |                        |                      |          |          | 84     | 117  | 123.1271   | 117.0000  |                                                           |                         |    |    |   |   |   |   |
| FN0108  | -1.384                 | 8.112                |          |          | 9      | 19   | 10.2964    | 24.7307   | AAL94317.1  Microcin C7 self-immunity protein mccF        |                         |    |    |   |   |   |   |
|         |                        |                      |          |          |        | 29   |            | 29.0000   |                                                           |                         |    |    |   |   |   |   |
| FN0110  | 0.054                  | 17.418               | 1.069e-1 | 5.177e-1 | 342    | 303  | 391.2642   | 394.3898  | AAL94319.1  Seryl-tRNA synthetase                         |                         |    |    |   |   |   |   |
|         |                        |                      |          |          | 315    | 427  | 461.7266   | 427.0000  |                                                           |                         |    |    |   |   |   |   |
| FN0113  | -3.118                 | 11.409               | 3.382e-6 | 5.898e-7 | 13     | 114  | 14.8726    | 148.3843  | AAL94322.1  Heat-inducible transcription repressor hrcA   |                         |    |    |   |   |   |   |
|         |                        |                      |          |          | 14     | 159  | 20.5212    | 159.0000  |                                                           |                         |    |    |   |   |   |   |
| FN0114  | 0.384                  | 14.400               | 3.79e-2  | 1.627e-1 | 163    | 71   | 186.4797   | 92.4148   | AAL94323.1  GrpE protein                                  |                         |    |    |   |   |   |   |
|         |                        |                      |          |          | 102    | 165  | 149.5115   | 165.0000  |                                                           |                         |    |    |   |   |   |   |
| FN0116  | -0.780                 | 20.992               | 3.583e-2 | 1.525e-1 | 1009   | 902  | 1154.3438  | 1174.0581 | AAL94325.1  Chaperone protein dnaK                        |                         |    |    |   |   |   |   |
|         |                        |                      |          |          | 716    | 2611 | 1049.5118  | 2611.0000 |                                                           |                         |    |    |   |   |   |   |
| FN0117  |                        |                      |          |          |        | 10   |            | 13.0162   | AAL94326.1  O6-methylguanine-DNA methyltransferase        |                         |    |    |   |   |   |   |
|         |                        |                      |          |          |        | 32   |            | 32.0000   |                                                           |                         |    |    |   |   |   |   |
| FN0118  | 0.135                  | 12.562               | 4.615e-2 | 2.036e-1 | 72     | 51   | 82.3714    | 66.3824   | AAL94327.1  Chaperone protein dnaJ                        |                         |    |    |   |   |   |   |
|         |                        |                      |          |          | 55     | 82   | 80.6189    | 82.0000   |                                                           |                         |    |    |   |   |   |   |
| FN0119  |                        |                      |          |          |        | 29   |            | 37.7469   | AAL94328.1  Flavodoxin                                    |                         |    |    |   |   |   |   |
|         |                        |                      |          |          |        | 81   |            | 81.0000   |                                                           |                         |    |    |   |   |   |   |
| FN0123  |                        |                      |          |          |        | 6    |            | 7.8097    | AAL94332.1  ATPase                                        |                         |    |    |   |   |   |   |
|         |                        |                      |          |          |        | 7    |            | 7.0000    |                                                           |                         |    |    |   |   |   |   |
| FN0127  |                        |                      |          |          |        | 5    |            | 6.5081    | AAL94333.1  Fe-S oxidoreductase                           |                         |    |    |   |   |   |   |
|         |                        |                      |          |          |        | 7    |            | 7.0000    |                                                           |                         |    |    |   |   |   |   |
| FN0128  | -0.652                 | 7.616                | 6.216e-2 | 2.842e-1 | 8      | 7    | 9.1524     | 9.1113    | AAL94334.1  Spermidine/putrescine-binding protein         |                         |    |    |   |   |   |   |
|         |                        |                      |          |          | 9      | 26   | 13.1922    | 26.0000   |                                                           |                         |    |    |   |   |   |   |
| FN0130  | -0.066                 | 8.307                | 1.747e-1 | 9.157e-1 | 24     | 8    | 27.4571    | 10.4129   | AAL94336.1  ABC transporter ATP-binding protein           |                         |    |    |   |   |   |   |
|         |                        |                      |          |          | 5      | 26   | 7.3290     | 26.0000   |                                                           |                         |    |    |   |   |   |   |
| FN0132  | 0.908                  | 6.078                |          |          | 12     |      | 13.7286    |           | AAL93916.1  Hemolysin                                     |                         |    |    |   |   |   |   |
|         |                        |                      |          |          | 6      | 6    | 8.7948     | 6.0000    |                                                           |                         |    |    |   |   |   |   |
| FN0147  | -0.184                 | 9.822                | 2.855e-2 | 1.178e-1 | 25     | 27   | 28.6012    | 35.1436   | AAL94353.1  PLSX protein                                  |                         |    |    |   |   |   |   |
|         |                        |                      |          |          | 19     | 29   | 27.8502    | 29.0000   |                                                           |                         |    |    |   |   |   |   |
| FN0148  | 0.149                  | 16.131               | 1.1e-1   | 5.344e-1 | 242    | 248  | 276.8595   | 322.8009  | AAL94354.1  3-oxoacyl-[acyl-carrier-protein] synthase III |                         |    |    |   |   |   |   |
|         |                        |                      |          |          | 196    | 186  | 287.2965   | 186.0000  |                                                           |                         |    |    |   |   |   |   |

Show detected proteins only

Show all proteins

Filter by category:

GO: amino acid transport

Proteins found:  
1344

Enter (or paste) list of ORFs

Find ORFs

Test

Cutoff

q-Value

p-Value

.005

| Signif | Direction | Applies To   |
|--------|-----------|--------------|
| yes    | +         | ratios, bars |
| no     | n/a       | bars         |
| yes    | -         | ratios, bars |
| yes    | +         | p-, q-Values |
| yes    | -         |              |

Dot Plots

Dot Plots

Fn Summary Table FnPg vs Fn FnSg vs Fn FnPgSg vs Fn FnPgSg vs FnPg FnSg vs FnPg FnPgSg vs FnSg Fn Coverage

| Protein | FnPgSg vs FnSg         |                      |          |          | Raw    |      | Normalized |          | Description                                                   | Log <sub>2</sub> Ratios |    |    |   |   |   |   |
|---------|------------------------|----------------------|----------|----------|--------|------|------------|----------|---------------------------------------------------------------|-------------------------|----|----|---|---|---|---|
|         | Log <sub>2</sub> Ratio | Log <sub>2</sub> Sum | q-Value  | p-Value  | FnPgSg | FnSg | FnPgSg     | FnSg     |                                                               | -6                      | -4 | -2 | 0 | 2 | 4 | 6 |
| FN0149  | 1.089                  | 14.935               | 1.855e-3 | 4.21e-3  | 190    | 115  | 217.3690   | 149.6859 | AAL94355.1  Malonyl-CoA-[acyl-carrier-protein] transacylase   |                         |    |    |   |   |   |   |
|         |                        |                      |          |          | 204    | 93   | 299.0229   | 93.0000  |                                                               |                         |    |    |   |   |   |   |
| FN0150  | 0.873                  | 11.317               | 2.254e-4 | 2.589e-4 | 58     | 32   | 66.3547    | 41.6517  | AAL94356.1  Acyl carrier protein                              |                         |    |    |   |   |   |   |
|         |                        |                      |          |          | 48     | 33   | 70.3583    | 33.0000  |                                                               |                         |    |    |   |   |   |   |
| FN0151  | 0.645                  | 19.562               | 9.456e-3 | 3.276e-2 | 893    | 389  | 1021.6343  | 506.3288 | AAL94357.1  3-oxoacyl-[acyl-carrier-protein] synthase         |                         |    |    |   |   |   |   |
|         |                        |                      |          |          | 804    | 901  | 1178.5021  | 901.0000 |                                                               |                         |    |    |   |   |   |   |
| FN0152  | -0.126                 | 5.874                |          |          |        |      |            |          | AAL94358.1  Ribonuclease III                                  |                         |    |    |   |   |   |   |
|         |                        |                      |          |          | 5      | 8    | 7.3290     | 8.0000   |                                                               |                         |    |    |   |   |   |   |
| FN0153  |                        |                      |          |          |        |      |            |          | AAL94359.1  Oxygen-independent coproporphyrinogen III oxidase |                         |    |    |   |   |   |   |
|         |                        |                      |          |          |        | 13   |            | 13.0000  |                                                               |                         |    |    |   |   |   |   |
| FN0154  |                        |                      |          |          |        |      |            |          | AAL94360.1  Ribonuclease G                                    |                         |    |    |   |   |   |   |
|         |                        |                      |          |          | 5      |      | 7.3290     |          |                                                               |                         |    |    |   |   |   |   |
| FN0155  | 1.151                  | 5.795                |          |          | 13     |      | 14.8726    |          | AAL94361.1  Hypothetical protein                              |                         |    |    |   |   |   |   |
|         |                        |                      |          |          | 5      | 5    | 7.3290     | 5.0000   |                                                               |                         |    |    |   |   |   |   |
| FN0156  | 0.503                  | 8.139                | 7.204e-2 | 3.354e-1 | 17     | 4    | 19.4488    | 5.2065   | AAL94362.1  Phosphopantetheine adenylyltransferase            |                         |    |    |   |   |   |   |
|         |                        |                      |          |          | 14     | 23   | 20.5212    | 23.0000  |                                                               |                         |    |    |   |   |   |   |
| FN0157  |                        |                      |          |          |        | 6    |            | 7.8097   | AAL94363.1  DNA repair protein RadA                           |                         |    |    |   |   |   |   |
|         |                        |                      |          |          |        | 7    |            | 7.0000   |                                                               |                         |    |    |   |   |   |   |
| FN0158  | -1.353                 | 9.813                | 4.684e-4 | 6.842e-4 | 20     | 36   | 22.8809    | 46.8582  | AAL94364.1  DNA-binding protein                               |                         |    |    |   |   |   |   |
|         |                        |                      |          |          | 10     | 49   | 14.6580    | 49.0000  |                                                               |                         |    |    |   |   |   |   |
| FN0161  |                        |                      |          |          |        |      |            |          | AAL94367.1  RNA-directed DNA polymerase                       |                         |    |    |   |   |   |   |
|         |                        |                      |          |          |        | 3    |            | 3.0000   |                                                               |                         |    |    |   |   |   |   |
| FN0164  | -1.058                 | 15.276               | 1.113e-2 | 3.991e-2 | 117    | 278  | 133.8535   | 361.8494 | AAL94370.1  Anhydro-N-acetylmuramyl-tripeptide amidase        |                         |    |    |   |   |   |   |
|         |                        |                      |          |          | 97     | 213  | 142.1825   | 213.0000 |                                                               |                         |    |    |   |   |   |   |
| FN0170  | -0.569                 | 14.645               | 1.633e-2 | 6.229e-2 | 117    | 179  | 133.8535   | 232.9894 | AAL94376.1  GTP-binding protein                               |                         |    |    |   |   |   |   |
|         |                        |                      |          |          | 88     | 157  | 128.9903   | 157.0000 |                                                               |                         |    |    |   |   |   |   |
| FN0173  | 0.266                  | 12.069               | 4.161e-2 | 1.811e-1 | 68     | 55   | 77.7952    | 71.5889  | AAL94379.1  Hypothetical protein                              |                         |    |    |   |   |   |   |
|         |                        |                      |          |          | 45     | 48   | 65.9609    | 48.0000  |                                                               |                         |    |    |   |   |   |   |
| FN0174  | 0.943                  | 13.772               | 4.162e-3 | 1.176e-2 | 165    | 65   | 188.7678   | 84.6051  | AAL94380.1  Enoyl-[acyl-carrier-protein] reductase            |                         |    |    |   |   |   |   |
|         |                        |                      |          |          | 95     | 86   | 139.2509   | 86.0000  |                                                               |                         |    |    |   |   |   |   |
| FN0175  | -1.121                 | 9.143                |          |          |        | 27   |            | 35.1436  | AAL94381.1  Cell division inhibitor MinC                      |                         |    |    |   |   |   |   |
|         |                        |                      |          |          | 11     | 35   | 16.1238    | 35.0000  |                                                               |                         |    |    |   |   |   |   |

Show detected proteins only  
 Show all proteins  
 Filter by category:

Proteins found: 1344

Test Cutoff

| Signif | Direction | Applies To   |
|--------|-----------|--------------|
| yes    | +         | ratios, bars |
| no     | n/a       | bars         |
| yes    | -         | ratios, bars |
| yes    | +         | p-, q-Values |
| yes    | -         | p-, q-Values |

Fn Summary Table FnPg vs Fn FnSg vs Fn FnPgSg vs Fn FnPgSg vs FnPg FnSg vs FnPg FnPgSg vs FnSg Fn Coverage

| Protein | FnPgSg vs FnSg         |                      |          |          | Raw    |      | Normalized |          | Description                                         | Log <sub>2</sub> Ratios |    |    |   |   |   |   |
|---------|------------------------|----------------------|----------|----------|--------|------|------------|----------|-----------------------------------------------------|-------------------------|----|----|---|---|---|---|
|         | Log <sub>2</sub> Ratio | Log <sub>2</sub> Sum | q-Value  | p-Value  | FnPgSg | FnSg | FnPgSg     | FnSg     |                                                     | -6                      | -4 | -2 | 0 | 2 | 4 | 6 |
| FN0176  | -0.576                 | 16.192               | 7.056e-4 | 1.212e-3 | 174    | 272  | 199.0642   | 354.0397 | AAL94382.1  Cell division inhibitor MinD            |                         |    |    |   |   |   |   |
|         |                        |                      |          |          | 170    | 314  | 249.1858   | 314.0000 |                                                     |                         |    |    |   |   |   |   |
| FN0177  |                        |                      |          |          | 11     |      | 12.5845    |          | AAL94383.1  Cell division inhibitor MinE            |                         |    |    |   |   |   |   |
|         |                        |                      |          |          | 11     |      | 16.1238    |          |                                                     |                         |    |    |   |   |   |   |
| FN0178  | 0.546                  | 10.888               | 1.39e-3  | 2.937e-3 | 42     | 30   | 48.0500    | 39.0485  | AAL94384.1  UNC-44 ankyrins                         |                         |    |    |   |   |   |   |
|         |                        |                      |          |          | 39     | 33   | 57.1661    | 33.0000  |                                                     |                         |    |    |   |   |   |   |
| FN0179  | -0.260                 | 9.545                | 9.701e-2 | 4.647e-1 | 27     | 16   | 30.8893    | 20.8259  | AAL94385.1  Ankyrin repeat proteins                 |                         |    |    |   |   |   |   |
|         |                        |                      |          |          | 13     | 39   | 19.0554    | 39.0000  |                                                     |                         |    |    |   |   |   |   |
| FN0180  | 0.708                  | 5.680                |          |          | 8      | 4    | 9.1524     | 5.2065   | AAL94386.1  Tetratricopeptide repeat family protein |                         |    |    |   |   |   |   |
|         |                        |                      |          |          |        | 6    |            | 6.0000   |                                                     |                         |    |    |   |   |   |   |
| FN0181  | -1.174                 | 9.065                | 1.618e-3 | 3.554e-3 | 9      | 25   | 10.2964    | 32.5404  | AAL94387.1  Hypothetical protein                    |                         |    |    |   |   |   |   |
|         |                        |                      |          |          | 14     | 37   | 20.5212    | 37.0000  |                                                     |                         |    |    |   |   |   |   |
| FN0182  | -3.119                 | 15.402               | 1.447e-5 | 5.349e-6 | 76     | 474  | 86.9476    | 616.9663 | AAL94388.1  Sarcosine oxidase alpha subunit         |                         |    |    |   |   |   |   |
|         |                        |                      |          |          | 37     | 610  | 54.2345    | 610.0000 |                                                     |                         |    |    |   |   |   |   |
| FN0183  | -1.301                 | 15.772               | 4.587e-5 | 3.095e-5 | 152    | 274  | 173.8952   | 356.6429 | AAL94389.1  Glycerol-3-phosphate dehydrogenase      |                         |    |    |   |   |   |   |
|         |                        |                      |          |          | 87     | 386  | 127.5245   | 386.0000 |                                                     |                         |    |    |   |   |   |   |
| FN0185  | -0.787                 | 7.895                | 3.582e-4 | 4.845e-4 | 9      | 15   | 10.2964    | 19.5242  | AAL94391.1  Hypothetical protein                    |                         |    |    |   |   |   |   |
|         |                        |                      |          |          | 9      | 21   | 13.1922    | 21.0000  |                                                     |                         |    |    |   |   |   |   |
| FN0189  | -0.773                 | 6.802                | 4.787e-3 | 1.42e-2  | 9      | 12   | 10.2964    | 15.6194  | AAL94395.1  Two-component response regulator yesN   |                         |    |    |   |   |   |   |
|         |                        |                      |          |          | 4      | 12   | 5.8632     | 12.0000  |                                                     |                         |    |    |   |   |   |   |
| FN0190  |                        |                      |          |          |        | 5    |            | 6.5081   | AAL94396.1  Two-component sensor kinase yesM        |                         |    |    |   |   |   |   |
|         |                        |                      |          |          |        | 7    |            | 7.0000   |                                                     |                         |    |    |   |   |   |   |
| FN0191  | -1.562                 | 8.917                | 2.196e-3 | 5.195e-3 | 7      | 35   | 8.0083     | 45.5566  | AAL94397.1  helix-turn-helix DNA-binding protein    |                         |    |    |   |   |   |   |
|         |                        |                      |          |          | 12     | 30   | 17.5896    | 30.0000  |                                                     |                         |    |    |   |   |   |   |
| FN0192  | 0.972                  | 9.819                | 7.334e-4 | 1.277e-3 | 39     | 13   | 44.6178    | 16.9210  | AAL94398.1  Dipeptide-binding protein               |                         |    |    |   |   |   |   |
|         |                        |                      |          |          | 27     | 26   | 39.5766    | 26.0000  |                                                     |                         |    |    |   |   |   |   |
| FN0197  |                        |                      |          |          |        | 5    |            | 5.0000   | AAL94403.1  Methyltransferase                       |                         |    |    |   |   |   |   |
|         |                        |                      |          |          |        |      |            |          |                                                     |                         |    |    |   |   |   |   |
| FN0198  |                        |                      |          |          | 5      |      | 5.7202     |          | AAL94404.1  Transcriptional regulatory protein      |                         |    |    |   |   |   |   |
|         |                        |                      |          |          | 6      |      | 8.7948     |          |                                                     |                         |    |    |   |   |   |   |
| FN0199  | -0.742                 | 11.518               | 3.161e-3 | 8.198e-3 | 45     | 50   | 51.4821    | 65.0808  | AAL94405.1  Hypothetical protein                    |                         |    |    |   |   |   |   |
|         |                        |                      |          |          | 22     | 75   | 32.2476    | 75.0000  |                                                     |                         |    |    |   |   |   |   |

Show detected proteins only  
 Show all proteins  
 Filter by category:

Proteins found: 1344

Test Cutoff

| Signif | Direction | Applies To   |
|--------|-----------|--------------|
| yes    | +         | ratios, bars |
| no     | n/a       | bars         |
| yes    | -         | ratios, bars |
| yes    | +         | p-, q-Values |
| yes    | -         | p-, q-Values |

Fn Summary Table FnPg vs Fn FnSg vs Fn FnPgSg vs Fn FnPgSg vs FnPg FnSg vs FnPg FnPgSg vs FnSg Fn Coverage

| Protein | FnPgSg vs FnSg         |                      |          |          | Raw    |      | Normalized |           | Description                                                                 | Log <sub>2</sub> Ratios |    |    |   |   |   |   |
|---------|------------------------|----------------------|----------|----------|--------|------|------------|-----------|-----------------------------------------------------------------------------|-------------------------|----|----|---|---|---|---|
|         | Log <sub>2</sub> Ratio | Log <sub>2</sub> Sum | q-Value  | p-Value  | FnPgSg | FnSg | FnPgSg     | FnSg      |                                                                             | -6                      | -4 | -2 | 0 | 2 | 4 | 6 |
| FN0200  | 0.553                  | 18.395               | 8.884e-6 | 2.354e-6 | 609    | 385  | 696.7248   | 501.1224  | AAL94406.1  Biotin carboxyl carrier protein of glutaconyl-CoA decarboxylase |                         |    |    |   |   |   |   |
|         |                        |                      |          |          | 495    | 468  | 725.5703   | 468.0000  |                                                                             |                         |    |    |   |   |   |   |
| FN0202  | 1.013                  | 19.668               | 4.71e-3  | 1.39e-2  | 1335   | 454  | 1527.3032  | 590.9339  | AAL94408.1  Glutaconate CoA-transferase subunit A                           |                         |    |    |   |   |   |   |
|         |                        |                      |          |          | 727    | 694  | 1065.6356  | 694.0000  |                                                                             |                         |    |    |   |   |   |   |
| FN0203  | 0.012                  | 20.093               | 1.755e-1 | 9.207e-1 | 833    | 730  | 952.9915   | 950.1801  | AAL94409.1  Glutaconate CoA-transferase subunit B                           |                         |    |    |   |   |   |   |
|         |                        |                      |          |          | 799    | 1156 | 1171.1731  | 1156.0000 |                                                                             |                         |    |    |   |   |   |   |
| FN0204  | 0.101                  | 21.482               | 7.827e-2 | 3.674e-1 | 1462   | 1129 | 1672.5972  | 1469.5251 | AAL94410.1  Glutaconyl-CoA decarboxylase A subunit                          |                         |    |    |   |   |   |   |
|         |                        |                      |          |          | 1277   | 1835 | 1871.8248  | 1835.0000 |                                                                             |                         |    |    |   |   |   |   |
| FN0206  | 0.170                  | 11.038               | 5.194e-2 | 2.327e-1 | 44     | 38   | 50.3381    | 49.4614   | AAL94412.1  Activator of (R)-2-hydroxyglutaryl-CoA dehydratase              |                         |    |    |   |   |   |   |
|         |                        |                      |          |          | 32     | 37   | 46.9056    | 37.0000   |                                                                             |                         |    |    |   |   |   |   |
| FN0207  | 0.227                  | 18.648               | 1.91e-4  | 2.051e-4 | 620    | 444  | 709.3094   | 577.9178  | AAL94413.1  (R)-2-hydroxyglutaryl-CoA dehydratase alpha-subunit             |                         |    |    |   |   |   |   |
|         |                        |                      |          |          | 462    | 607  | 677.1990   | 607.0000  |                                                                             |                         |    |    |   |   |   |   |
| FN0208  | 0.499                  | 17.509               | 8.199e-4 | 1.491e-3 | 435    | 254  | 497.6606   | 330.6106  | AAL94414.1  (R)-2-hydroxyglutaryl-CoA dehydratase beta-subunit              |                         |    |    |   |   |   |   |
|         |                        |                      |          |          | 361    | 396  | 529.1533   | 396.0000  |                                                                             |                         |    |    |   |   |   |   |
| FN0209  | 0.149                  | 17.497               | 9.177e-2 | 4.371e-1 | 383    | 248  | 438.1701   | 322.8009  | AAL94415.1  Hypothetical cytosolic protein                                  |                         |    |    |   |   |   |   |
|         |                        |                      |          |          | 319    | 494  | 467.5898   | 494.0000  |                                                                             |                         |    |    |   |   |   |   |
| FN0212  | -0.101                 | 8.257                | 1.233e-1 | 6.084e-1 | 18     | 14   | 20.5929    | 18.2226   | AAL94418.1  Hypothetical protein                                            |                         |    |    |   |   |   |   |
|         |                        |                      |          |          | 9      | 18   | 13.1922    | 18.0000   |                                                                             |                         |    |    |   |   |   |   |
| FN0218  | -0.185                 | 12.164               | 4.958e-2 | 2.207e-1 | 56     | 48   | 64.0667    | 62.4776   | AAL94424.1  Anthranilate synthase component II                              |                         |    |    |   |   |   |   |
|         |                        |                      |          |          | 43     | 82   | 63.0293    | 82.0000   |                                                                             |                         |    |    |   |   |   |   |
| FN0219  | -0.448                 | 7.166                |          |          |        |      |            |           | AAL94425.1  Autolysin response regulator                                    |                         |    |    |   |   |   |   |
|         |                        |                      |          |          | 7      | 14   | 10.2606    | 14.0000   |                                                                             |                         |    |    |   |   |   |   |
| FN0221  | 1.264                  | 11.528               | 4.095e-3 | 1.15e-2  | 87     | 27   | 99.5321    | 35.1436   | AAL94427.1  Carbon starvation protein A                                     |                         |    |    |   |   |   |   |
|         |                        |                      |          |          | 47     | 35   | 68.8925    | 35.0000   |                                                                             |                         |    |    |   |   |   |   |
| FN0224  | 0.774                  | 8.040                | 1.765e-2 | 6.82e-2  | 23     | 6    | 26.3131    | 7.8097    | AAL94430.1  Excinuclease ABC subunit B                                      |                         |    |    |   |   |   |   |
|         |                        |                      |          |          | 11     | 17   | 16.1238    | 17.0000   |                                                                             |                         |    |    |   |   |   |   |
| FN0225  |                        |                      |          |          |        |      |            |           | AAL94431.1  Gluconate permease                                              |                         |    |    |   |   |   |   |
|         |                        |                      |          |          |        | 3    |            | 3.0000    |                                                                             |                         |    |    |   |   |   |   |
| FN0226  | 0.592                  | 11.120               | 1.971e-3 | 4.537e-3 | 50     | 26   | 57.2024    | 33.8420   | AAL94432.1  Pyridoxal phosphate biosynthetic protein pdxA                   |                         |    |    |   |   |   |   |
|         |                        |                      |          |          | 40     | 43   | 58.6319    | 43.0000   |                                                                             |                         |    |    |   |   |   |   |
| FN0227  |                        |                      |          |          |        |      |            |           | AAL94433.1  Hypothetical protein                                            |                         |    |    |   |   |   |   |
|         |                        |                      |          |          |        | 5    |            | 5.0000    |                                                                             |                         |    |    |   |   |   |   |

Show detected proteins only  
 Show all proteins  
 Filter by category:

Proteins found: 1344

Enter (or paste) list of ORFs

Find ORFs

Test Cutoff

q-Value p-Value

.005

| Signif | Direction | Applies To   |
|--------|-----------|--------------|
| yes    | +         | ratios, bars |
| no     | n/a       | bars         |
| yes    | -         | ratios, bars |
| yes    | +         | p-, q-Values |
| yes    | -         | p-, q-Values |

Dot Plots Dot Plots



Fn Summary Table FnPg vs Fn FnSg vs Fn FnPgSg vs Fn FnPgSg vs FnPg FnSg vs FnPg FnPgSg vs FnSg Fn Coverage

| Protein | FnPgSg vs FnSg         |                      |          |          | Raw    |      | Normalized |          | Description                                           | Log <sub>2</sub> Ratios |    |    |   |   |   |   |
|---------|------------------------|----------------------|----------|----------|--------|------|------------|----------|-------------------------------------------------------|-------------------------|----|----|---|---|---|---|
|         | Log <sub>2</sub> Ratio | Log <sub>2</sub> Sum | q-Value  | p-Value  | FnPgSg | FnSg | FnPgSg     | FnSg     |                                                       | -6                      | -4 | -2 | 0 | 2 | 4 | 6 |
| FN0233  | 0.291                  | 11.663               | 6.601e-3 | 2.126e-2 | 55     | 43   | 62.9226    | 55.9695  | AAL94439.1  Hypothetical protein                      |                         |    |    |   |   |   |   |
|         |                        |                      |          |          | 43     | 47   | 63.0293    | 47.0000  |                                                       |                         |    |    |   |   |   |   |
| FN0234  |                        |                      |          |          |        | 11   |            | 14.3178  | AAL94440.1  unknown                                   |                         |    |    |   |   |   |   |
|         |                        |                      |          |          |        | 14   |            | 14.0000  |                                                       |                         |    |    |   |   |   |   |
| FN0236  | 0.862                  | 14.248               | 6.066e-4 | 9.851e-4 | 152    | 76   | 173.8952   | 98.9229  | AAL94442.1  ABC transporter substrate-binding protein |                         |    |    |   |   |   |   |
|         |                        |                      |          |          | 138    | 108  | 202.2802   | 108.0000 |                                                       |                         |    |    |   |   |   |   |
| FN0238  | 0.486                  | 9.723                | 2.967e-2 | 1.23e-1  | 23     | 17   | 26.3131    | 22.1275  | AAL94444.1  Hypothetical protein                      |                         |    |    |   |   |   |   |
|         |                        |                      |          |          | 29     | 27   | 42.5082    | 27.0000  |                                                       |                         |    |    |   |   |   |   |
| FN0240  | 0.642                  | 12.446               | 3.401e-3 | 8.998e-3 | 76     | 55   | 86.9476    | 71.5889  | AAL94446.1  Thymidylate synthase                      |                         |    |    |   |   |   |   |
|         |                        |                      |          |          | 68     | 48   | 99.6743    | 48.0000  |                                                       |                         |    |    |   |   |   |   |
| FN0241  | -1.693                 | 8.416                | 6.776e-4 | 1.148e-3 | 9      | 28   | 10.2964    | 36.4453  | AAL94447.1  Dihydrofolate reductase                   |                         |    |    |   |   |   |   |
|         |                        |                      |          |          | 7      | 30   | 10.2606    | 30.0000  |                                                       |                         |    |    |   |   |   |   |
| FN0242  | -2.684                 | 11.394               | 8.481e-4 | 1.565e-3 | 14     | 116  | 16.0167    | 150.9875 | AAL94448.1  Trk system potassium uptake protein trkA  |                         |    |    |   |   |   |   |
|         |                        |                      |          |          | 17     | 112  | 24.9186    | 112.0000 |                                                       |                         |    |    |   |   |   |   |
| FN0243  | -2.517                 | 7.621                |          |          |        | 17   |            | 22.1275  | AAL94449.1  Poly(A) polymerase                        |                         |    |    |   |   |   |   |
|         |                        |                      |          |          | 4      | 45   | 5.8632     | 45.0000  |                                                       |                         |    |    |   |   |   |   |
| FN0244  |                        |                      |          |          |        | 6    |            | 7.8097   | AAL94450.1  COP associated protein                    |                         |    |    |   |   |   |   |
|         |                        |                      |          |          |        |      |            |          |                                                       |                         |    |    |   |   |   |   |
| FN0245  | -0.905                 | 6.464                |          |          | 6      | 9    | 6.8643     | 11.7145  | AAL94451.1  Copper-exporting ATPase                   |                         |    |    |   |   |   |   |
|         |                        |                      |          |          |        | 14   |            | 14.0000  |                                                       |                         |    |    |   |   |   |   |
| FN0247  | 0.163                  | 15.347               | 9.41e-2  | 4.493e-1 | 229    | 149  | 261.9868   | 193.9409 | AAL94453.1  Hypothetical cytosolic protein            |                         |    |    |   |   |   |   |
|         |                        |                      |          |          | 116    | 192  | 170.0326   | 192.0000 |                                                       |                         |    |    |   |   |   |   |
| FN0248  | -2.300                 | 9.029                |          |          | 9      | 28   | 10.2964    | 36.4453  | AAL94454.1  Hypothetical Exported Protein             |                         |    |    |   |   |   |   |
|         |                        |                      |          |          |        | 65   |            | 65.0000  |                                                       |                         |    |    |   |   |   |   |
| FN0249  | 1.004                  | 13.451               | 5.799e-3 | 1.815e-2 | 121    | 81   | 138.4297   | 105.4309 | AAL94455.1  unknown                                   |                         |    |    |   |   |   |   |
|         |                        |                      |          |          | 110    | 44   | 161.2378   | 44.0000  |                                                       |                         |    |    |   |   |   |   |
| FN0250  | 1.058                  | 13.619               | 4.575e-3 | 1.338e-2 | 142    | 81   | 162.4547   | 105.4309 | AAL94456.1  unknown                                   |                         |    |    |   |   |   |   |
|         |                        |                      |          |          | 110    | 50   | 161.2378   | 50.0000  |                                                       |                         |    |    |   |   |   |   |
| FN0251  | 2.392                  | 13.594               | 2.816e-3 | 7.096e-3 | 175    | 40   | 200.2083   | 52.0647  | AAL94457.1  Hypothetical membrane-spanning Protein    |                         |    |    |   |   |   |   |
|         |                        |                      |          |          | 211    | 45   | 309.2835   | 45.0000  |                                                       |                         |    |    |   |   |   |   |
| FN0252  | -0.913                 | 17.211               | 3.001e-5 | 1.622e-5 | 231    | 430  | 264.2749   | 559.6951 | AAL94458.1  unknown                                   |                         |    |    |   |   |   |   |
|         |                        |                      |          |          | 207    | 509  | 303.4203   | 509.0000 |                                                       |                         |    |    |   |   |   |   |

Show detected proteins only  
 Show all proteins  
 Filter by category:

Proteins found: 1344

Enter (or paste) list of ORFs

Find ORFs

Test Cutoff

q-Value

p-Value

.005

| Signif | Direction | Applies To   |
|--------|-----------|--------------|
| yes    | +         | ratios, bars |
| no     | n/a       | bars         |
| yes    | -         | ratios, bars |
| yes    | +         | p-, q-Values |
| yes    | -         | p-, q-Values |

Dot Plots Dot Plots

Fn Summary Table FnPg vs Fn FnSg vs Fn FnPgSg vs Fn FnPgSg vs FnPg FnSg vs FnPg FnPgSg vs FnSg Fn Coverage

| Protein       | FnPgSg vs FnSg         |                      |           |           | Raw    |      | Normalized |           | Description                                                       | Log <sub>2</sub> Ratios |    |    |   |   |   |   |
|---------------|------------------------|----------------------|-----------|-----------|--------|------|------------|-----------|-------------------------------------------------------------------|-------------------------|----|----|---|---|---|---|
|               | Log <sub>2</sub> Ratio | Log <sub>2</sub> Sum | q-Value   | p-Value   | FnPgSg | FnSg | FnPgSg     | FnSg      |                                                                   | -6                      | -4 | -2 | 0 | 2 | 4 | 6 |
| <b>FN0253</b> | -0.305                 | 16.664               | 8.723e-2  | 4.134e-1  | 234    | 180  | 267.7071   | 234.2910  | AAL94459.1  Outer membrane protein                                |                         |    |    |   |   |   |   |
|               |                        |                      |           |           | 213    | 482  | 312.2151   | 482.0000  |                                                                   |                         |    |    |   |   |   |   |
| <b>FN0254</b> | -0.085                 | 18.108               | 1.214e-1  | 5.977e-1  | 373    | 444  | 426.7297   | 577.9178  | AAL94460.1  Fusobacterium outer membrane protein family           |                         |    |    |   |   |   |   |
|               |                        |                      |           |           | 413    | 517  | 605.3748   | 517.0000  |                                                                   |                         |    |    |   |   |   |   |
| <b>FN0258</b> | -0.256                 | 5.359                |           |           |        |      |            |           | AAL94464.1  Zinc-transporting ATPase                              |                         |    |    |   |   |   |   |
|               |                        |                      |           |           | 4      | 7    | 5.8632     | 7.0000    |                                                                   |                         |    |    |   |   |   |   |
| <b>FN0259</b> |                        |                      |           |           | 11     |      | 12.5845    |           | AAL94465.1  Zinc-transporting ATPase                              |                         |    |    |   |   |   |   |
|               |                        |                      |           |           | 12     |      | 17.5896    |           |                                                                   |                         |    |    |   |   |   |   |
| <b>FN0261</b> | 0.284                  | 7.370                | 4.485e-2  | 1.971e-1  | 12     | 11   | 13.7286    | 14.3178   | AAL94467.1  Pyruvate formate-lyase activating enzyme              |                         |    |    |   |   |   |   |
|               |                        |                      |           |           | 10     | 9    | 14.6580    | 9.0000    |                                                                   |                         |    |    |   |   |   |   |
| <b>FN0262</b> | 2.137                  | 22.492               | 8.649e-11 | 5.458e-13 | 4443   | 878  | 5083.0024  | 1142.8193 | AAL94468.1  Formate acetyltransferase                             |                         |    |    |   |   |   |   |
|               |                        |                      |           |           | 3482   | 1173 | 5103.9107  | 1173.0000 |                                                                   |                         |    |    |   |   |   |   |
| <b>FN0263</b> | 0.584                  | 14.433               | 4.604e-3  | 1.349e-2  | 180    | 106  | 205.9285   | 137.9714  | AAL94469.1  Peptidyl-prolyl cis-trans isomerase                   |                         |    |    |   |   |   |   |
|               |                        |                      |           |           | 108    | 105  | 158.3062   | 105.0000  |                                                                   |                         |    |    |   |   |   |   |
| <b>FN0264</b> | 0.696                  | 16.067               | 1.196e-2  | 4.339e-2  | 273    | 211  | 312.3249   | 274.6411  | AAL94470.1  Hypothetical protein                                  |                         |    |    |   |   |   |   |
|               |                        |                      |           |           | 242    | 137  | 354.7233   | 137.0000  |                                                                   |                         |    |    |   |   |   |   |
| <b>FN0265</b> | -0.318                 | 5.876                |           |           | 6      | 7    | 6.8643     | 9.1113    | AAL94471.1  Cell division protein ftsX                            |                         |    |    |   |   |   |   |
|               |                        |                      |           |           |        | 8    |            | 8.0000    |                                                                   |                         |    |    |   |   |   |   |
| <b>FN0266</b> |                        |                      |           |           |        |      |            |           | AAL94472.1  membrane protein related to metalloendopeptidase      |                         |    |    |   |   |   |   |
|               |                        |                      |           |           | 3      |      | 4.3974     |           |                                                                   |                         |    |    |   |   |   |   |
| <b>FN0267</b> |                        |                      |           |           |        |      |            |           | AAL94473.1  ATP-NAD kinase                                        |                         |    |    |   |   |   |   |
|               |                        |                      |           |           |        | 8    |            | 8.0000    |                                                                   |                         |    |    |   |   |   |   |
| <b>FN0268</b> | -2.256                 | 6.529                |           |           |        |      |            |           | AAL94474.1  DNA repair protein recN                               |                         |    |    |   |   |   |   |
|               |                        |                      |           |           | 3      | 21   | 4.3974     | 21.0000   |                                                                   |                         |    |    |   |   |   |   |
| <b>FN0270</b> | 0.033                  | 4.735                | 1.521e-1  | 7.763e-1  | 4      | 4    | 4.5762     | 5.2065    | AAL94476.1  GTP-binding protein era                               |                         |    |    |   |   |   |   |
|               |                        |                      |           |           | 4      | 5    | 5.8632     | 5.0000    |                                                                   |                         |    |    |   |   |   |   |
| <b>FN0271</b> | -1.016                 | 5.404                |           |           | 4      | 5    | 4.5762     | 6.5081    | AAL94477.1  Enoyl-CoA hydratase                                   |                         |    |    |   |   |   |   |
|               |                        |                      |           |           |        | 12   |            | 12.0000   |                                                                   |                         |    |    |   |   |   |   |
| <b>FN0272</b> |                        |                      |           |           |        | 10   |            | 13.0162   | AAL94478.1  Acetoacetate: butyrate/acetate coenzyme A transferase |                         |    |    |   |   |   |   |
|               |                        |                      |           |           |        | 8    |            | 8.0000    |                                                                   |                         |    |    |   |   |   |   |
| <b>FN0273</b> |                        |                      |           |           |        | 4    |            | 5.2065    | AAL94479.1  Butyrate-acetoacetate CoA-transferase subunit B       |                         |    |    |   |   |   |   |
|               |                        |                      |           |           |        | 11   |            | 11.0000   |                                                                   |                         |    |    |   |   |   |   |

Show detected proteins only  
 Show all proteins  
 Filter by category:

Proteins found:  
1344

Test Cutoff

| Signif | Direction | Applies To   |
|--------|-----------|--------------|
| yes    | +         | ratios, bars |
| no     | n/a       | bars         |
| yes    | -         | ratios, bars |
| yes    | +         | p-, q-Values |
| yes    | -         |              |

Fn Summary Table FnPg vs Fn FnSg vs Fn FnPgSg vs Fn FnPgSg vs FnPg FnSg vs FnPg FnPgSg vs FnSg Fn Coverage

| Protein | FnPgSg vs FnSg         |                      |          |          | Raw    |      | Normalized |          | Description                                                | Log <sub>2</sub> Ratios |    |    |   |   |   |   |
|---------|------------------------|----------------------|----------|----------|--------|------|------------|----------|------------------------------------------------------------|-------------------------|----|----|---|---|---|---|
|         | Log <sub>2</sub> Ratio | Log <sub>2</sub> Sum | q-Value  | p-Value  | FnPgSg | FnSg | FnPgSg     | FnSg     |                                                            | -6                      | -4 | -2 | 0 | 2 | 4 | 6 |
| FN0276  | -3.677                 | 8.066                |          |          | 4      | 50   | 4.5762     | 65.0808  | AAL94482.1  Sodium-dependent phosphate transporter         |                         |    |    |   |   |   |   |
|         |                        |                      |          |          |        | 52   |            | 52.0000  |                                                            |                         |    |    |   |   |   |   |
| FN0277  | -0.085                 | 6.808                | 1.476e-1 | 7.491e-1 | 9      | 6    | 10.2964    | 7.8097   | AAL94483.1  Hypothetical protein                           |                         |    |    |   |   |   |   |
|         |                        |                      |          |          | 7      | 14   | 10.2606    | 14.0000  |                                                            |                         |    |    |   |   |   |   |
| FN0278  | 0.837                  | 16.201               | 3.591e-3 | 9.653e-3 | 362    | 158  | 414.1451   | 205.6554 | AAL94484.1  Xaa-His dipeptidase                            |                         |    |    |   |   |   |   |
|         |                        |                      |          |          | 218    | 205  | 319.5441   | 205.0000 |                                                            |                         |    |    |   |   |   |   |
| FN0279  | -2.119                 | 13.369               | 1.953e-4 | 2.115e-4 | 44     | 175  | 50.3381    | 227.7829 | AAL94485.1  Lipoprotein                                    |                         |    |    |   |   |   |   |
|         |                        |                      |          |          | 33     | 201  | 48.3714    | 201.0000 |                                                            |                         |    |    |   |   |   |   |
| FN0280  | -0.017                 | 12.941               | 1.276e-1 | 6.33e-1  | 76     | 71   | 86.9476    | 92.4148  | AAL94486.1  Hypothetical protein                           |                         |    |    |   |   |   |   |
|         |                        |                      |          |          | 61     | 86   | 89.4137    | 86.0000  |                                                            |                         |    |    |   |   |   |   |
| FN0281  | -2.769                 | 11.502               | 1.689e-3 | 3.756e-3 | 13     | 87   | 14.8726    | 113.2406 | AAL94487.1  DNA polymerase III alpha subunit               |                         |    |    |   |   |   |   |
|         |                        |                      |          |          | 18     | 168  | 26.3844    | 168.0000 |                                                            |                         |    |    |   |   |   |   |
| FN0282  | -0.302                 | 11.142               | 3.537e-2 | 1.503e-1 | 30     | 45   | 34.3214    | 58.5727  | AAL94488.1  Hypothetical protein                           |                         |    |    |   |   |   |   |
|         |                        |                      |          |          | 35     | 47   | 51.3030    | 47.0000  |                                                            |                         |    |    |   |   |   |   |
| FN0283  | -0.296                 | 6.044                |          |          |        |      |            |          | AAL94489.1  tRNA (Guanine-N1) - methyltransferase          |                         |    |    |   |   |   |   |
|         |                        |                      |          |          | 5      | 9    | 7.3290     | 9.0000   |                                                            |                         |    |    |   |   |   |   |
| FN0284  | -1.330                 | 10.005               | 2.036e-3 | 4.722e-3 | 11     | 32   | 12.5845    | 41.6517  | AAL94490.1  16S rRNA processing protein rimM               |                         |    |    |   |   |   |   |
|         |                        |                      |          |          | 19     | 60   | 27.8502    | 60.0000  |                                                            |                         |    |    |   |   |   |   |
| FN0285  |                        |                      |          |          | 22     |      | 25.1690    |          | AAL94491.1  RNA binding protein                            |                         |    |    |   |   |   |   |
|         |                        |                      |          |          | 10     |      | 14.6580    |          |                                                            |                         |    |    |   |   |   |   |
| FN0287  | -0.215                 | 6.357                | 1.081e-1 | 5.241e-1 | 7      | 5    | 8.0083     | 6.5081   | AAL94493.1  Dimethyladenosine transferase                  |                         |    |    |   |   |   |   |
|         |                        |                      |          |          | 6      | 13   | 8.7948     | 13.0000  |                                                            |                         |    |    |   |   |   |   |
| FN0288  | -0.336                 | 11.262               | 2.47e-2  | 1.002e-1 | 31     | 41   | 35.4655    | 53.3663  | AAL94494.1  Hypoxanthine-guanine phosphoribosyltransferase |                         |    |    |   |   |   |   |
|         |                        |                      |          |          | 36     | 58   | 52.7687    | 58.0000  |                                                            |                         |    |    |   |   |   |   |
| FN0290  |                        |                      |          |          |        |      |            |          | AAL94496.1  Hemolysin                                      |                         |    |    |   |   |   |   |
|         |                        |                      |          |          | 3      |      | 4.3974     |          |                                                            |                         |    |    |   |   |   |   |
| FN0291  | 0.017                  | 4.661                |          |          | 5      |      | 5.7202     |          | AAL94497.1  Hemolysin                                      |                         |    |    |   |   |   |   |
|         |                        |                      |          |          | 3      | 5    | 4.3974     | 5.0000   |                                                            |                         |    |    |   |   |   |   |
| FN0294  | 1.498                  | 13.983               | 4.768e-4 | 7.007e-4 | 188    | 71   | 215.0809   | 92.4148  | AAL94500.1  Transketolase subunit A                        |                         |    |    |   |   |   |   |
|         |                        |                      |          |          | 145    | 59   | 212.5408   | 59.0000  |                                                            |                         |    |    |   |   |   |   |
| FN0295  | 0.418                  | 13.712               | 3.996e-3 | 1.113e-2 | 106    | 71   | 121.2690   | 92.4148  | AAL94501.1  Transketolase                                  |                         |    |    |   |   |   |   |
|         |                        |                      |          |          | 100    | 108  | 146.5799   | 108.0000 |                                                            |                         |    |    |   |   |   |   |

Show detected proteins only  
 Show all proteins  
 Filter by category:

Proteins found: 1344

Test Cutoff

| Signif | Direction | Applies To   |
|--------|-----------|--------------|
| yes    | +         | ratios, bars |
| no     | n/a       | bars         |
| yes    | -         | ratios, bars |
| yes    | +         | p-, q-Values |
| yes    | -         |              |

Fn Summary Table FnPg vs Fn FnSg vs Fn FnPgSg vs Fn FnPgSg vs FnPg FnSg vs FnPg FnPgSg vs FnSg Fn Coverage

| Protein | FnPgSg vs FnSg         |                      |          |          | Raw    |      | Normalized |          | Description                                                             | Log <sub>2</sub> Ratios |    |    |   |   |   |   |
|---------|------------------------|----------------------|----------|----------|--------|------|------------|----------|-------------------------------------------------------------------------|-------------------------|----|----|---|---|---|---|
|         | Log <sub>2</sub> Ratio | Log <sub>2</sub> Sum | q-Value  | p-Value  | FnPgSg | FnSg | FnPgSg     | FnSg     |                                                                         | -6                      | -4 | -2 | 0 | 2 | 4 | 6 |
| FN0296  | 0.483                  | 12.045               | 5.828e-3 | 1.827e-2 | 60     | 43   | 68.6428    | 55.9695  | AAL94502.1   Hypothetical cytosolic protein                             |                         |    |    |   |   |   |   |
|         |                        |                      |          |          | 58     | 54   | 85.0163    | 54.0000  |                                                                         |                         |    |    |   |   |   |   |
| FN0297  | -1.646                 | 7.919                |          |          |        | 20   |            | 26.0323  | AAL94503.1   ATPase associated with chromosome architecture/replication |                         |    |    |   |   |   |   |
|         |                        |                      |          |          | 6      | 29   | 8.7948     | 29.0000  |                                                                         |                         |    |    |   |   |   |   |
| FN0298  | -0.502                 | 15.867               | 7.901e-8 | 2.493e-9 | 181    | 225  | 207.0726   | 292.8637 | AAL94504.1   Histidyl-tRNA synthetase                                   |                         |    |    |   |   |   |   |
|         |                        |                      |          |          | 139    | 289  | 203.7460   | 289.0000 |                                                                         |                         |    |    |   |   |   |   |
| FN0299  | 0.175                  | 16.311               | 3.052e-3 | 7.844e-3 | 262    | 198  | 299.7404   | 257.7201 | AAL94505.1   Aspartyl-tRNA synthetase                                   |                         |    |    |   |   |   |   |
|         |                        |                      |          |          | 209    | 279  | 306.3519   | 279.0000 |                                                                         |                         |    |    |   |   |   |   |
| FN0305  |                        |                      |          |          | 3      |      | 3.4321     |          | AAL94511.1   Iron(III) dicitrate-binding protein                        |                         |    |    |   |   |   |   |
|         |                        |                      |          |          | 3      |      | 4.3974     |          |                                                                         |                         |    |    |   |   |   |   |
| FN0307  |                        |                      |          |          |        |      |            |          | AAL94513.1   Iron(III) dicitrate transport ATP-binding protein fecE     |                         |    |    |   |   |   |   |
|         |                        |                      |          |          | 3      |      | 4.3974     |          |                                                                         |                         |    |    |   |   |   |   |
| FN0308  | -0.590                 | 17.429               | 3.99e-3  | 1.11e-2  | 354    | 417  | 404.9928   | 542.7741 | AAL94514.1   Iron(III)-binding protein                                  |                         |    |    |   |   |   |   |
|         |                        |                      |          |          | 191    | 488  | 279.9675   | 488.0000 |                                                                         |                         |    |    |   |   |   |   |
| FN0309  |                        |                      |          |          | 5      |      | 5.7202     |          | AAL94515.1   Iron(III)-transport system permease protein sfuB           |                         |    |    |   |   |   |   |
|         |                        |                      |          |          | 8      |      | 11.7264    |          |                                                                         |                         |    |    |   |   |   |   |
| FN0310  | 1.147                  | 12.443               | 4.279e-3 | 1.222e-2 | 116    | 44   | 132.7095   | 57.2711  | AAL94516.1   Iron(III)-transport ATP-binding protein sfuC               |                         |    |    |   |   |   |   |
|         |                        |                      |          |          | 61     | 43   | 89.4137    | 43.0000  |                                                                         |                         |    |    |   |   |   |   |
| FN0311  | -0.504                 | 14.183               | 8.717e-4 | 1.621e-3 | 90     | 132  | 102.9643   | 171.8134 | AAL94517.1   Anaerobic ribonucleoside-triphosphate reductase            |                         |    |    |   |   |   |   |
|         |                        |                      |          |          | 86     | 153  | 126.0587   | 153.0000 |                                                                         |                         |    |    |   |   |   |   |
| FN0313  | -2.199                 | 7.231                |          |          | 5      | 25   | 5.7202     | 32.5404  | AAL94519.1   16S rRNA m(5)C 967 methyltransferase                       |                         |    |    |   |   |   |   |
|         |                        |                      |          |          |        | 20   |            | 20.0000  |                                                                         |                         |    |    |   |   |   |   |
| FN0314  |                        |                      |          |          |        |      |            | 11.7145  | AAL94520.1   Caffeoyl-CoA O-methyltransferase                           |                         |    |    |   |   |   |   |
|         |                        |                      |          |          |        |      |            | 9.0000   |                                                                         |                         |    |    |   |   |   |   |
| FN0315  |                        |                      |          |          |        |      |            | 6.5081   | AAL94521.1   Transcriptional regulator, AraC family                     |                         |    |    |   |   |   |   |
|         |                        |                      |          |          |        |      |            | 10.0000  |                                                                         |                         |    |    |   |   |   |   |
| FN0316  | 1.665                  | 8.325                | 5.114e-4 | 7.712e-4 | 25     | 7    | 28.6012    | 9.1113   | AAL94522.1   Hypothetical protein                                       |                         |    |    |   |   |   |   |
|         |                        |                      |          |          | 24     | 11   | 35.1792    | 11.0000  |                                                                         |                         |    |    |   |   |   |   |
| FN0317  | -2.254                 | 8.308                | 2.366e-4 | 2.776e-4 | 4      | 29   | 4.5762     | 37.7469  | AAL94523.1   Tryptophan synthase beta chain                             |                         |    |    |   |   |   |   |
|         |                        |                      |          |          | 8      | 40   | 11.7264    | 40.0000  |                                                                         |                         |    |    |   |   |   |   |
| FN0319  | -0.705                 | 5.808                |          |          |        | 7    |            | 9.1113   | AAL94525.1   Citrate (pro-3S)-lyase ligase                              |                         |    |    |   |   |   |   |
|         |                        |                      |          |          | 4      | 10   | 5.8632     | 10.0000  |                                                                         |                         |    |    |   |   |   |   |

Show detected proteins only  
 Show all proteins  
 Filter by category:

Proteins found: 1344

Enter (or paste) list of ORFs

Find ORFs

Test Cutoff

q-Value p-Value

.005

| Signif | Direction | Applies To   |
|--------|-----------|--------------|
| yes    | +         | ratios, bars |
| no     | n/a       | bars         |
| yes    | -         | ratios, bars |
| yes    | +         | p-, q-Values |
| yes    | -         | p-, q-Values |

Dot Plots Dot Plots

Fn Summary Table FnPg vs Fn FnSg vs Fn FnPgSg vs Fn FnPgSg vs FnPg FnSg vs FnPg FnPgSg vs FnSg Fn Coverage

| Protein | FnPgSg vs FnSg         |                      |          |          | Raw    |      | Normalized |           | Description                                                          | Log <sub>2</sub> Ratios |    |    |   |   |   |   |
|---------|------------------------|----------------------|----------|----------|--------|------|------------|-----------|----------------------------------------------------------------------|-------------------------|----|----|---|---|---|---|
|         | Log <sub>2</sub> Ratio | Log <sub>2</sub> Sum | q-Value  | p-Value  | FnPgSg | FnSg | FnPgSg     | FnSg      |                                                                      | -6                      | -4 | -2 | 0 | 2 | 4 | 6 |
| FN0320  | 1.792                  | 8.879                | 1.383e-4 | 1.325e-4 | 36     | 11   | 41.1857    | 14.3178   | AAL94526.1  Hypothetical cytosolic protein                           |                         |    |    |   |   |   |   |
|         |                        |                      |          |          | 27     | 9    | 39.5766    | 9.0000    |                                                                      |                         |    |    |   |   |   |   |
| FN0321  | -0.814                 | 14.776               | 6.964e-3 | 2.27e-2  | 103    | 140  | 117.8369   | 182.2263  | AAL94527.1  Heat shock protein htpG                                  |                         |    |    |   |   |   |   |
|         |                        |                      |          |          | 92     | 262  | 134.8535   | 262.0000  |                                                                      |                         |    |    |   |   |   |   |
| FN0322  | -0.225                 | 21.849               | 3.356e-2 | 1.415e-1 | 1688   | 1816 | 1931.1519  | 2363.7357 | AAL94528.1  Fructose-bisphosphate aldolase                           |                         |    |    |   |   |   |   |
|         |                        |                      |          |          | 1136   | 1839 | 1665.1472  | 1839.0000 |                                                                      |                         |    |    |   |   |   |   |
| FN0325  | 5.373                  | 9.373                |          |          | 122    |      | 139.5738   |           | AAL94529.1  LSU ribosomal protein L20P                               |                         |    |    |   |   |   |   |
|         |                        |                      |          |          | 131    | 4    | 192.0196   | 4.0000    |                                                                      |                         |    |    |   |   |   |   |
| FN0326  |                        |                      |          |          | 16     |      | 18.3048    |           | AAL94530.1  LSU ribosomal protein L35P                               |                         |    |    |   |   |   |   |
|         |                        |                      |          |          | 18     |      | 26.3844    |           |                                                                      |                         |    |    |   |   |   |   |
| FN0327  | -0.108                 | 9.634                | 1.507e-1 | 7.677e-1 | 18     | 15   | 20.5929    | 19.5242   | AAL94531.1  Bacterial Protein Translation Initiation Factor 3 (IF-3) |                         |    |    |   |   |   |   |
|         |                        |                      |          |          | 23     | 39   | 33.7134    | 39.0000   |                                                                      |                         |    |    |   |   |   |   |
| FN0329  | 0.299                  | 17.198               | 7.56e-3  | 2.512e-2 | 347    | 243  | 396.9844   | 316.2928  | AAL94533.1  LSU ribosomal protein L13P                               |                         |    |    |   |   |   |   |
|         |                        |                      |          |          | 316    | 383  | 463.1924   | 383.0000  |                                                                      |                         |    |    |   |   |   |   |
| FN0330  | 2.682                  | 12.617               | 1.481e-5 | 5.583e-6 | 187    | 35   | 213.9369   | 45.5566   | AAL94534.1  SSU ribosomal protein S9P                                |                         |    |    |   |   |   |   |
|         |                        |                      |          |          | 128    | 17   | 187.6222   | 17.0000   |                                                                      |                         |    |    |   |   |   |   |
| FN0331  | -0.016                 | 12.055               | 1.707e-1 | 8.905e-1 | 57     | 57   | 65.2107    | 74.1921   | AAL94535.1  Hypothetical protein                                     |                         |    |    |   |   |   |   |
|         |                        |                      |          |          | 44     | 57   | 64.4951    | 57.0000   |                                                                      |                         |    |    |   |   |   |   |
| FN0332  | -0.638                 | 6.641                |          |          | 7      | 13   | 8.0083     | 16.9210   | AAL94536.1  Magnesium and cobalt transport protein corA              |                         |    |    |   |   |   |   |
|         |                        |                      |          |          |        | 8    |            | 8.0000    |                                                                      |                         |    |    |   |   |   |   |
| FN0333  |                        |                      |          |          |        |      | 5          | 6.5081    | AAL94537.1  Glycerol uptake operon antiterminator regulatory protein |                         |    |    |   |   |   |   |
|         |                        |                      |          |          |        |      | 9          | 9.0000    |                                                                      |                         |    |    |   |   |   |   |
| FN0334  | -0.704                 | 15.108               | 2.038e-3 | 4.73e-3  | 128    | 168  | 146.4381   | 218.6716  | AAL94538.1  Aspartate/aromatic aminotransferase                      |                         |    |    |   |   |   |   |
|         |                        |                      |          |          | 101    | 261  | 148.0457   | 261.0000  |                                                                      |                         |    |    |   |   |   |   |
| FN0335  | -1.328                 | 20.789               | 8.524e-4 | 1.576e-3 | 764    | 1798 | 874.0522   | 2340.3066 | AAL94539.1  Outer membrane porin F                                   |                         |    |    |   |   |   |   |
|         |                        |                      |          |          | 563    | 1925 | 825.2446   | 1925.0000 |                                                                      |                         |    |    |   |   |   |   |
| FN0336  | 0.666                  | 11.366               | 9.5e-3   | 3.294e-2 | 67     | 35   | 76.6512    | 45.5566   | AAL94540.1  Hypothetical protein                                     |                         |    |    |   |   |   |   |
|         |                        |                      |          |          | 36     | 36   | 52.7687    | 36.0000   |                                                                      |                         |    |    |   |   |   |   |
| FN0341  | 3.408                  | 9.875                | 2.655e-6 | 4.131e-7 | 90     | 6    | 102.9643   | 7.8097    | AAL94545.1  transport protein                                        |                         |    |    |   |   |   |   |
|         |                        |                      |          |          | 66     | 11   | 96.7427    | 11.0000   |                                                                      |                         |    |    |   |   |   |   |
| FN0342  | 0.999                  | 10.458               | 9.333e-3 | 3.225e-2 | 44     | 30   | 50.3381    | 39.0485   | AAL94546.1  Peptidyl-prolyl cis-trans isomerase                      |                         |    |    |   |   |   |   |
|         |                        |                      |          |          | 38     | 14   | 55.7003    | 14.0000   |                                                                      |                         |    |    |   |   |   |   |

Show detected proteins only  
 Show all proteins  
 Filter by category:

Proteins found: 1344

Enter (or paste) list of ORFs

Find ORFs

Test Cutoff

q-Value p-Value

.005

| Signif | Direction | Applies To   |
|--------|-----------|--------------|
| yes    | +         | ratios, bars |
| no     | n/a       | bars         |
| yes    | -         | ratios, bars |
| yes    | +         | p-, q-Values |
| yes    | -         | p-, q-Values |

Dot Plots Dot Plots

Fn Summary Table FnPg vs Fn FnSg vs Fn FnPgSg vs Fn FnPgSg vs FnPg FnSg vs FnPg FnPgSg vs FnSg Fn Coverage

| Protein | FnPgSg vs FnSg         |                      |          |          | Raw    |      | Normalized |          | Description                                                 | Log <sub>2</sub> Ratios |    |    |   |   |   |   |
|---------|------------------------|----------------------|----------|----------|--------|------|------------|----------|-------------------------------------------------------------|-------------------------|----|----|---|---|---|---|
|         | Log <sub>2</sub> Ratio | Log <sub>2</sub> Sum | q-Value  | p-Value  | FnPgSg | FnSg | FnPgSg     | FnSg     |                                                             | -6                      | -4 | -2 | 0 | 2 | 4 | 6 |
| FN0344  |                        |                      |          |          |        | 3    |            | 3.0000   | AAL94548.1  Methyltransferase                               |                         |    |    |   |   |   |   |
| FN0347  | -1.266                 | 10.946               | 1.861e-4 | 1.979e-4 | 27     | 49   | 30.8893    | 63.7792  | AAL94551.1  Phosphatidylserine decarboxylase                |                         |    |    |   |   |   |   |
| FN0348  | -0.208                 | 15.783               | 6.699e-2 | 3.091e-1 | 203    | 233  | 232.2416   | 303.2767 | AAL94552.1  Nicotinate phosphoribosyltransferase            |                         |    |    |   |   |   |   |
| FN0349  | -1.725                 | 8.757                |          |          | 10     | 22   | 11.4405    | 28.6356  | AAL94553.1  D-Tyr-tRNATyr deacylase                         |                         |    |    |   |   |   |   |
| FN0351  | 2.212                  | 12.080               | 7.791e-6 | 1.885e-6 | 122    | 27   | 139.5738   | 35.1436  | AAL94555.1  unknown                                         |                         |    |    |   |   |   |   |
| FN0352  | -0.501                 | 10.333               | 1.264e-2 | 4.63e-2  | 31     | 38   | 35.4655    | 49.4614  | AAL94556.1  NA+/H+ antiporter NHAC                          |                         |    |    |   |   |   |   |
| FN0355  | -0.566                 | 14.877               | 1.074e-2 | 3.819e-2 | 116    | 189  | 132.7095   | 246.0055 | AAL94558.1  S-adenosylmethionine synthetase                 |                         |    |    |   |   |   |   |
| FN0356  | 0.482                  | 6.858                |          |          | 12     | 7    | 13.7286    | 9.1113   | AAL94559.1  Lactoylglutathione lyase                        |                         |    |    |   |   |   |   |
| FN0357  | 0.311                  | 7.519                | 4.074e-2 | 1.768e-1 | 11     | 11   | 12.5845    | 14.3178  | AAL94560.1  ATP synthase epsilon chain, sodium ion specific |                         |    |    |   |   |   |   |
| FN0358  | -0.644                 | 17.129               | 8.106e-3 | 2.734e-2 | 268    | 420  | 306.6047   | 546.6790 | AAL94561.1  ATP synthase beta chain, sodium ion specific    |                         |    |    |   |   |   |   |
| FN0359  | -0.314                 | 11.927               | 4.047e-3 | 1.132e-2 | 53     | 57   | 60.6345    | 74.1921  | AAL94562.1  ATP synthase gamma chain, sodium ion specific   |                         |    |    |   |   |   |   |
| FN0360  | -0.446                 | 14.314               | 3.751e-3 | 1.022e-2 | 101    | 140  | 115.5488   | 182.2263 | AAL94563.1  ATP synthase alpha chain, sodium ion specific   |                         |    |    |   |   |   |   |
| FN0361  | 0.209                  | 9.714                | 1.088e-1 | 5.281e-1 | 25     | 13   | 28.6012    | 16.9210  | AAL94564.1  ATP synthase delta chain, sodium ion specific   |                         |    |    |   |   |   |   |
| FN0362  | -0.471                 | 10.599               | 2.038e-2 | 8.06e-2  | 29     | 29   | 33.1774    | 37.7469  | AAL94565.1  ATP synthase B chain, sodium ion specific       |                         |    |    |   |   |   |   |
| FN0364  |                        |                      |          |          | 9      |      | 10.2964    |          | AAL94567.1  ATP synthase A chain, sodium ion specific       |                         |    |    |   |   |   |   |
| FN0366  | 0.516                  | 16.073               | 2.89e-3  | 7.328e-3 | 253    | 193  | 289.4440   | 251.2120 | AAL94569.1  Phosphoglucosamine mutase                       |                         |    |    |   |   |   |   |

Show detected proteins only  
 Show all proteins  
 Filter by category:

Proteins found: 1344

Enter (or paste) list of ORFs

Find ORFs

Test Cutoff

q-Value p-Value

.005

| Signif | Direction | Applies To   |
|--------|-----------|--------------|
| yes    | +         | ratios, bars |
| no     | n/a       | bars         |
| yes    | -         | ratios, bars |
| yes    | +         | p-, q-Values |
| yes    | -         | p-, q-Values |

Dot Plots Dot Plots

Fn Summary Table FnPg vs Fn FnSg vs Fn FnPgSg vs Fn FnPgSg vs FnPg FnSg vs FnPg FnPgSg vs FnSg Fn Coverage

| Protein | FnPgSg vs FnSg         |                      |          |          | Raw    |      | Normalized |          | Description                                                   | Log <sub>2</sub> Ratios |    |    |   |   |   |   |
|---------|------------------------|----------------------|----------|----------|--------|------|------------|----------|---------------------------------------------------------------|-------------------------|----|----|---|---|---|---|
|         | Log <sub>2</sub> Ratio | Log <sub>2</sub> Sum | q-Value  | p-Value  | FnPgSg | FnSg | FnPgSg     | FnSg     |                                                               | -6                      | -4 | -2 | 0 | 2 | 4 | 6 |
| FN0368  | 0.609                  | 12.646               | 2.347e-3 | 5.658e-3 | 78     | 42   | 89.2357    | 54.6679  | AAL94571.1  Adenylosuccinate lyase                            |                         |    |    |   |   |   |   |
|         |                        |                      |          |          | 74     | 75   | 108.4691   | 75.0000  |                                                               |                         |    |    |   |   |   |   |
| FN0370  | -0.233                 | 9.143                | 1.014e-1 | 4.882e-1 | 14     | 25   | 16.0167    | 32.5404  | AAL94573.1  Signal peptidase I                                |                         |    |    |   |   |   |   |
|         |                        |                      |          |          | 19     | 19   | 27.8502    | 19.0000  |                                                               |                         |    |    |   |   |   |   |
| FN0371  | 3.068                  | 10.169               |          |          | 100    | 9    | 114.4047   | 11.7145  | AAL94574.1  Hypothetical protein                              |                         |    |    |   |   |   |   |
|         |                        |                      |          |          | 56     |      | 82.0847    |          |                                                               |                         |    |    |   |   |   |   |
| FN0374  |                        |                      |          |          |        |      |            |          | AAL94577.1  Single-stranded-DNA-specific exonuclease recJ     |                         |    |    |   |   |   |   |
|         |                        |                      |          |          |        | 20   |            | 20.0000  |                                                               |                         |    |    |   |   |   |   |
| FN0375  | -0.572                 | 18.893               | 5.766e-3 | 1.801e-2 | 466    | 740  | 533.1261   | 963.1963 | AAL94578.1  Iron(III)-binding protein                         |                         |    |    |   |   |   |   |
|         |                        |                      |          |          | 417    | 738  | 611.2380   | 738.0000 |                                                               |                         |    |    |   |   |   |   |
| FN0376  | -1.858                 | 12.828               | 2.183e-4 | 2.474e-4 | 36     | 115  | 41.1857    | 149.6859 | AAL94579.1  Iron(III)-transport ATP-binding protein sfuC      |                         |    |    |   |   |   |   |
|         |                        |                      |          |          | 33     | 175  | 48.3714    | 175.0000 |                                                               |                         |    |    |   |   |   |   |
| FN0377  | 2.456                  | 7.100                |          |          | 39     |      | 44.6178    |          | AAL94580.1  Iron(III)-transport system permease protein sfuB  |                         |    |    |   |   |   |   |
|         |                        |                      |          |          | 7      | 5    | 10.2606    | 5.0000   |                                                               |                         |    |    |   |   |   |   |
| FN0378  | 0.625                  | 6.421                | 6.098e-2 | 2.782e-1 | 6      | 3    | 6.8643     | 3.9048   | AAL94581.1  UDP-glucose 4-epimerase                           |                         |    |    |   |   |   |   |
|         |                        |                      |          |          | 11     | 11   | 16.1238    | 11.0000  |                                                               |                         |    |    |   |   |   |   |
| FN0379  | 1.048                  | 6.218                |          |          | 14     |      | 16.0167    |          | AAL94582.1  Hypothetical protein                              |                         |    |    |   |   |   |   |
|         |                        |                      |          |          | 6      | 6    | 8.7948     | 6.0000   |                                                               |                         |    |    |   |   |   |   |
| FN0380  |                        |                      |          |          |        |      |            |          | AAL94583.1  unknown                                           |                         |    |    |   |   |   |   |
|         |                        |                      |          |          | 6      |      | 8.7948     |          |                                                               |                         |    |    |   |   |   |   |
| FN0381  |                        |                      |          |          | 20     |      | 22.8809    |          | AAL94584.1  unknown                                           |                         |    |    |   |   |   |   |
|         |                        |                      |          |          | 18     |      | 26.3844    |          |                                                               |                         |    |    |   |   |   |   |
| FN0384  | 1.608                  | 6.013                | 2.007e-5 | 9.367e-6 | 13     | 4    | 14.8726    | 5.2065   | AAL94587.1  Hypothetical protein                              |                         |    |    |   |   |   |   |
|         |                        |                      |          |          | 9      | 4    | 13.1922    | 4.0000   |                                                               |                         |    |    |   |   |   |   |
| FN0387  | 0.776                  | 10.312               | 4.616e-2 | 2.036e-1 | 38     | 5    | 43.4738    | 6.5081   | AAL94590.1  Fusobacterium outer membrane protein family       |                         |    |    |   |   |   |   |
|         |                        |                      |          |          | 34     | 48   | 49.8372    | 48.0000  |                                                               |                         |    |    |   |   |   |   |
| FN0390  | 0.453                  | 12.917               | 1.121e-2 | 4.025e-2 | 103    | 64   | 117.8369   | 83.3035  | AAL94593.1  Hypothetical protein                              |                         |    |    |   |   |   |   |
|         |                        |                      |          |          | 60     | 67   | 87.9479    | 67.0000  |                                                               |                         |    |    |   |   |   |   |
| FN0391  | -0.885                 | 8.926                | 3.102e-4 | 4.034e-4 | 13     | 23   | 14.8726    | 29.9372  | AAL94594.1  Hydrolase (HAD superfamily)                       |                         |    |    |   |   |   |   |
|         |                        |                      |          |          | 12     | 30   | 17.5896    | 30.0000  |                                                               |                         |    |    |   |   |   |   |
| FN0392  | 0.677                  | 5.464                | 5.732e-3 | 1.788e-2 | 7      | 5    | 8.0083     | 6.5081   | AAL94595.1  Oxygen-independent coproporphyrinogen III oxidase |                         |    |    |   |   |   |   |
|         |                        |                      |          |          | 6      | 4    | 8.7948     | 4.0000   |                                                               |                         |    |    |   |   |   |   |

Show detected proteins only  
 Show all proteins  
 Filter by category:

Proteins found: 1344

Enter (or paste) list of ORFs

Find ORFs

Test Cutoff

q-Value

p-Value

| Signif | Direction | Applies To   |
|--------|-----------|--------------|
| yes    | +         | ratios, bars |
| no     | n/a       | bars         |
| yes    | -         | ratios, bars |
| yes    | +         | p-, q-Values |
| yes    | -         | p-, q-Values |

Dot Plots  Dot Plots

Fn Summary Table FnPg vs Fn FnSg vs Fn FnPgSg vs Fn FnPgSg vs FnPg FnSg vs FnPg FnPgSg vs FnSg Fn Coverage

| Protein | FnPgSg vs FnSg         |                      |          |          | Raw    |      | Normalized |           | Description                                                                  | Log <sub>2</sub> Ratios |    |    |   |   |   |   |
|---------|------------------------|----------------------|----------|----------|--------|------|------------|-----------|------------------------------------------------------------------------------|-------------------------|----|----|---|---|---|---|
|         | Log <sub>2</sub> Ratio | Log <sub>2</sub> Sum | q-Value  | p-Value  | FnPgSg | FnSg | FnPgSg     | FnSg      |                                                                              | -6                      | -4 | -2 | 0 | 2 | 4 | 6 |
| FN0393  | -2.414                 | 7.482                | 3.101e-3 | 8.002e-3 | 5      | 29   | 5.7202     | 37.7469   | AAL94596.1  Polysaccharide deacetylase                                       |                         |    |    |   |   |   |   |
|         |                        |                      |          |          | 4      | 24   | 5.8632     | 24.0000   |                                                                              |                         |    |    |   |   |   |   |
| FN0394  | -0.409                 | 5.967                |          |          | 6      | 7    | 6.8643     | 9.1113    | AAL94597.1  Outer membrane protein                                           |                         |    |    |   |   |   |   |
|         |                        |                      |          |          |        |      |            |           |                                                                              |                         |    |    |   |   |   |   |
| FN0396  | -0.252                 | 24.814               | 5.178e-2 | 2.319e-1 | 4210   | 5397 | 4816.4394  | 7024.8246 | AAL94599.1  Dipeptide-binding protein                                        |                         |    |    |   |   |   |   |
|         |                        |                      |          |          | 3505   | 4827 | 5137.6241  | 4827.0000 |                                                                              |                         |    |    |   |   |   |   |
| FN0397  | 0.307                  | 11.418               | 7.009e-3 | 2.287e-2 | 53     | 40   | 60.6345    | 52.0647   | AAL94600.1  Dipeptide transport permease protein dppB                        |                         |    |    |   |   |   |   |
|         |                        |                      |          |          | 38     | 42   | 55.7003    | 42.0000   |                                                                              |                         |    |    |   |   |   |   |
| FN0398  | -0.005                 | 11.622               | 1.823e-1 | 9.645e-1 | 48     | 38   | 54.9143    | 49.4614   | AAL94601.1  Dipeptide transport permease protein dppC                        |                         |    |    |   |   |   |   |
|         |                        |                      |          |          | 39     | 63   | 57.1661    | 63.0000   |                                                                              |                         |    |    |   |   |   |   |
| FN0399  | -0.132                 | 15.402               | 1.068e-1 | 5.174e-1 | 149    | 138  | 170.4631   | 179.6231  | AAL94602.1  Dipeptide transport ATP-binding protein dppD                     |                         |    |    |   |   |   |   |
|         |                        |                      |          |          | 155    | 256  | 227.1988   | 256.0000  |                                                                              |                         |    |    |   |   |   |   |
| FN0400  | -0.687                 | 17.013               | 2.663e-4 | 3.311e-4 | 227    | 331  | 259.6988   | 430.8351  | AAL94603.1  Dipeptide transport ATP-binding protein dppF                     |                         |    |    |   |   |   |   |
|         |                        |                      |          |          | 214    | 492  | 313.6809   | 492.0000  |                                                                              |                         |    |    |   |   |   |   |
| FN0405  | 1.035                  | 13.828               | 3.145e-3 | 8.145e-3 | 175    | 58   | 200.2083   | 75.4938   | AAL94608.1  Tryptophanyl-tRNA synthetase                                     |                         |    |    |   |   |   |   |
|         |                        |                      |          |          | 99     | 93   | 145.1141   | 93.0000   |                                                                              |                         |    |    |   |   |   |   |
| FN0406  | 1.121                  | 10.829               | 8.129e-4 | 1.473e-3 | 60     | 16   | 68.6428    | 20.8259   | AAL94609.1  Alanine racemase, biosynthetic                                   |                         |    |    |   |   |   |   |
|         |                        |                      |          |          | 39     | 37   | 57.1661    | 37.0000   |                                                                              |                         |    |    |   |   |   |   |
| FN0407  | 1.902                  | 11.604               | 3.189e-4 | 4.188e-4 | 104    | 19   | 118.9809   | 24.7307   | AAL94610.1  Hypothetical protein                                             |                         |    |    |   |   |   |   |
|         |                        |                      |          |          | 66     | 33   | 96.7427    | 33.0000   |                                                                              |                         |    |    |   |   |   |   |
| FN0408  | -0.243                 | 12.819               | 1.574e-2 | 5.965e-2 | 61     | 76   | 69.7869    | 98.9229   | AAL94611.1  Acetyl-coenzyme A carboxylase carboxyl transferase subunit beta  |                         |    |    |   |   |   |   |
|         |                        |                      |          |          | 59     | 86   | 86.4821    | 86.0000   |                                                                              |                         |    |    |   |   |   |   |
| FN0409  | 1.034                  | 17.399               | 9.59e-4  | 1.833e-3 | 475    | 219  | 543.4225   | 285.0540  | AAL94612.1  Acetyl-coenzyme A carboxylase carboxyl transferase subunit alpha |                         |    |    |   |   |   |   |
|         |                        |                      |          |          | 441    | 296  | 646.4172   | 296.0000  |                                                                              |                         |    |    |   |   |   |   |
| FN0410  | 0.134                  | 13.738               | 2.035e-2 | 8.044e-2 | 109    | 80   | 124.7012   | 104.1293  | AAL94613.1  6-phosphofructokinase                                            |                         |    |    |   |   |   |   |
|         |                        |                      |          |          | 82     | 119  | 120.1955   | 119.0000  |                                                                              |                         |    |    |   |   |   |   |
| FN0411  |                        |                      |          |          |        | 13   |            | 16.9210   | AAL94614.1  putative alpha helix protein                                     |                         |    |    |   |   |   |   |
|         |                        |                      |          |          |        |      |            |           |                                                                              |                         |    |    |   |   |   |   |
| FN0413  |                        |                      |          |          | 4      |      | 4.5762     |           | AAL94616.1  unknown                                                          |                         |    |    |   |   |   |   |
|         |                        |                      |          |          |        |      |            |           |                                                                              |                         |    |    |   |   |   |   |
| FN0414  | 0.779                  | 4.779                |          |          | 6      |      | 6.8643     |           | AAL94617.1  ATP-dependent helicase HEPA                                      |                         |    |    |   |   |   |   |
|         |                        |                      |          |          |        | 4    | 4.0000     |           |                                                                              |                         |    |    |   |   |   |   |

Show detected proteins only  
 Show all proteins  
 Filter by category:

Proteins found: 1344

Enter (or paste) list of ORFs

Find ORFs

Test Cutoff

q-Value

p-Value

.005

| Signif | Direction | Applies To   |
|--------|-----------|--------------|
| yes    | +         | ratios, bars |
| no     | n/a       | bars         |
| yes    | -         | ratios, bars |
| yes    | +         | p-, q-Values |
| yes    | -         | p-, q-Values |

Dot Plots  Dot Plots



Fn Summary Table FnPg vs Fn FnSg vs Fn FnPgSg vs Fn FnPgSg vs FnPg FnSg vs FnPg FnPgSg vs FnSg Fn Coverage

| Protein | FnPgSg vs FnSg         |                      |          |          | Raw    |      | Normalized |          | Description                                                              | Log <sub>2</sub> Ratios |    |    |   |   |   |   |
|---------|------------------------|----------------------|----------|----------|--------|------|------------|----------|--------------------------------------------------------------------------|-------------------------|----|----|---|---|---|---|
|         | Log <sub>2</sub> Ratio | Log <sub>2</sub> Sum | q-Value  | p-Value  | FnPgSg | FnSg | FnPgSg     | FnSg     |                                                                          | -6                      | -4 | -2 | 0 | 2 | 4 | 6 |
| FN0416  |                        |                      |          |          | 9      |      | 10.2964    |          | AAL94619.1  Type III restriction-modification system methylation subunit |                         |    |    |   |   |   |   |
|         |                        |                      |          |          | 9      |      | 13.1922    |          |                                                                          |                         |    |    |   |   |   |   |
| FN0417  | 0.376                  | 7.020                |          |          | 15     |      | 17.1607    |          | AAL94620.1  Type III restriction-modification system restriction subunit |                         |    |    |   |   |   |   |
|         |                        |                      |          |          | 6      | 10   | 8.7948     | 10.0000  |                                                                          |                         |    |    |   |   |   |   |
| FN0418  | -4.377                 | 8.766                |          |          | 4      | 77   | 4.5762     | 100.2245 | AAL94621.1  Uracil phosphoribosyltransferase                             |                         |    |    |   |   |   |   |
|         |                        |                      |          |          |        | 90   |            | 90.0000  |                                                                          |                         |    |    |   |   |   |   |
| FN0419  | -0.156                 | 6.153                | 1.149e-1 | 5.614e-1 | 5      | 6    | 5.7202     | 7.8097   | AAL94622.1  Aspartate carbamoyltransferase                               |                         |    |    |   |   |   |   |
|         |                        |                      |          |          | 7      | 10   | 10.2606    | 10.0000  |                                                                          |                         |    |    |   |   |   |   |
| FN0420  | -3.496                 | 7.055                |          |          | 3      | 38   | 3.4321     | 49.4614  | AAL94623.1  Dihydroorotase                                               |                         |    |    |   |   |   |   |
|         |                        |                      |          |          |        | 28   |            | 28.0000  |                                                                          |                         |    |    |   |   |   |   |
| FN0421  | -1.876                 | 8.072                | 3.952e-5 | 2.469e-5 | 6      | 26   | 6.8643     | 33.8420  | AAL94624.1  Carbamoyl-phosphate synthase small chain                     |                         |    |    |   |   |   |   |
|         |                        |                      |          |          | 7      | 29   | 10.2606    | 29.0000  |                                                                          |                         |    |    |   |   |   |   |
| FN0422  | -1.258                 | 13.894               | 5.972e-4 | 9.625e-4 | 69     | 158  | 78.9393    | 205.6554 | AAL94625.1  Carbamoyl-phosphate synthase large chain                     |                         |    |    |   |   |   |   |
|         |                        |                      |          |          | 55     | 176  | 80.6189    | 176.0000 |                                                                          |                         |    |    |   |   |   |   |
| FN0423  | -2.168                 | 7.580                | 3.677e-7 | 3.48e-8  | 5      | 22   | 5.7202     | 28.6356  | AAL94626.1  Dihydroorotate dehydrogenase electron transfer subunit       |                         |    |    |   |   |   |   |
|         |                        |                      |          |          | 5      | 30   | 7.3290     | 30.0000  |                                                                          |                         |    |    |   |   |   |   |
| FN0424  | -2.638                 | 6.196                |          |          | 3      | 19   | 3.4321     | 24.7307  | AAL94627.1  Dihydroorotate dehydrogenase                                 |                         |    |    |   |   |   |   |
|         |                        |                      |          |          |        | 18   |            | 18.0000  |                                                                          |                         |    |    |   |   |   |   |
| FN0426  | -1.179                 | 10.328               | 4.122e-4 | 5.785e-4 | 25     | 46   | 28.6012    | 59.8744  | AAL94629.1  Orotidine 5'-phosphate decarboxylase                         |                         |    |    |   |   |   |   |
|         |                        |                      |          |          | 13     | 48   | 19.0554    | 48.0000  |                                                                          |                         |    |    |   |   |   |   |
| FN0427  | -0.251                 | 11.324               | 1.969e-2 | 7.742e-2 | 44     | 38   | 50.3381    | 49.4614  | AAL94630.1  Orotate phosphoribosyltransferase                            |                         |    |    |   |   |   |   |
|         |                        |                      |          |          | 29     | 61   | 42.5082    | 61.0000  |                                                                          |                         |    |    |   |   |   |   |
| FN0430  | 0.099                  | 15.184               | 7.447e-2 | 3.479e-1 | 171    | 159  | 195.6321   | 206.9570 | AAL94633.1  LSU ribosomal protein L19P                                   |                         |    |    |   |   |   |   |
|         |                        |                      |          |          | 139    | 166  | 203.7460   | 166.0000 |                                                                          |                         |    |    |   |   |   |   |
| FN0435  | -0.710                 | 11.011               | 3.245e-2 | 1.362e-1 | 48     | 47   | 54.9143    | 61.1760  | AAL94634.1  Purine nucleoside phosphorylase                              |                         |    |    |   |   |   |   |
|         |                        |                      |          |          | 11     | 55   | 16.1238    | 55.0000  |                                                                          |                         |    |    |   |   |   |   |
| FN0436  | -1.804                 | 10.829               | 8.356e-3 | 2.832e-2 | 13     | 41   | 14.8726    | 53.3663  | AAL94635.1  regulator of kinase autophosphorylation inhibitor            |                         |    |    |   |   |   |   |
|         |                        |                      |          |          | 21     | 106  | 30.7818    | 106.0000 |                                                                          |                         |    |    |   |   |   |   |
| FN0437  | -1.404                 | 7.249                | 2.962e-3 | 7.557e-3 | 3      | 17   | 3.4321     | 22.1275  | AAL94636.1  kinase autophosphorylation inhibitor KipI                    |                         |    |    |   |   |   |   |
|         |                        |                      |          |          | 8      | 18   | 11.7264    | 18.0000  |                                                                          |                         |    |    |   |   |   |   |
| FN0439  | 0.029                  | 11.834               | 1.751e-1 | 9.185e-1 | 58     | 32   | 66.3547    | 41.6517  | AAL94638.1  Lactam utilization protein LAMB                              |                         |    |    |   |   |   |   |
|         |                        |                      |          |          | 38     | 78   | 55.7003    | 78.0000  |                                                                          |                         |    |    |   |   |   |   |

Show detected proteins only  
 Show all proteins  
 Filter by category:

Proteins found: 1344

Test Cutoff

| Signif | Direction | Applies To   |
|--------|-----------|--------------|
| yes    | +         | ratios, bars |
| no     | n/a       | bars         |
| yes    | -         | ratios, bars |
| yes    | +         | p-, q-Values |
| yes    | -         |              |

Fn Summary Table FnPg vs Fn FnSg vs Fn FnPgSg vs Fn FnPgSg vs FnPg FnSg vs FnPg FnPgSg vs FnSg Fn Coverage

| Protein | FnPgSg vs FnSg         |                      |          |          | Raw    |      | Normalized |          | Description                                                                   | Log <sub>2</sub> Ratios |    |    |   |   |   |   |
|---------|------------------------|----------------------|----------|----------|--------|------|------------|----------|-------------------------------------------------------------------------------|-------------------------|----|----|---|---|---|---|
|         | Log <sub>2</sub> Ratio | Log <sub>2</sub> Sum | q-Value  | p-Value  | FnPgSg | FnSg | FnPgSg     | FnSg     |                                                                               | -6                      | -4 | -2 | 0 | 2 | 4 | 6 |
| FN0445  | 0.085                  | 5.255                |          |          | 6      |      | 6.8643     |          | AAL94641.1   Hypothetical protein                                             |                         |    |    |   |   |   |   |
|         |                        |                      |          |          | 4      | 6    | 5.8632     | 6.0000   |                                                                               |                         |    |    |   |   |   |   |
| FN0446  | -0.594                 | 7.934                | 1.861e-2 | 7.25e-2  | 12     | 18   | 13.7286    | 23.4291  | AAL94642.1   Hypothetical protein                                             |                         |    |    |   |   |   |   |
|         |                        |                      |          |          | 8      | 15   | 11.7264    | 15.0000  |                                                                               |                         |    |    |   |   |   |   |
| FN0447  | -1.907                 | 6.295                |          |          | 4      | 11   | 4.5762     | 14.3178  | AAL94643.1   NIFS protein                                                     |                         |    |    |   |   |   |   |
|         |                        |                      |          |          |        | 20   |            | 20.0000  |                                                                               |                         |    |    |   |   |   |   |
| FN0448  |                        |                      |          |          |        |      |            |          | AAL94644.1   DNA-repair protein                                               |                         |    |    |   |   |   |   |
|         |                        |                      |          |          | 3      |      | 4.3974     |          |                                                                               |                         |    |    |   |   |   |   |
| FN0450  | -0.497                 | 9.431                | 3.205e-2 | 1.343e-1 | 22     | 18   | 25.1690    | 23.4291  | AAL94646.1   ABC transporter ATP-binding protein                              |                         |    |    |   |   |   |   |
|         |                        |                      |          |          | 13     | 39   | 19.0554    | 39.0000  |                                                                               |                         |    |    |   |   |   |   |
| FN0451  | -0.545                 | 5.649                |          |          |        | 7    |            | 9.1113   | AAL94647.1   Hypothetical protein                                             |                         |    |    |   |   |   |   |
|         |                        |                      |          |          | 4      | 8    | 5.8632     | 8.0000   |                                                                               |                         |    |    |   |   |   |   |
| FN0452  | 1.852                  | 17.267               | 8.434e-5 | 6.921e-5 | 663    | 136  | 758.5034   | 177.0199 | AAL94648.1   Glucosamine--fructose-6-phosphate aminotransferase (isomerizing) |                         |    |    |   |   |   |   |
|         |                        |                      |          |          | 512    | 241  | 750.4889   | 241.0000 |                                                                               |                         |    |    |   |   |   |   |
| FN0453  | -0.516                 | 15.975               | 4.527e-4 | 6.539e-4 | 198    | 219  | 226.5214   | 285.0540 | AAL94649.1   Xaa-Pro aminopeptidase                                           |                         |    |    |   |   |   |   |
|         |                        |                      |          |          | 135    | 322  | 197.8828   | 322.0000 |                                                                               |                         |    |    |   |   |   |   |
| FN0454  | -1.924                 | 14.121               | 1.148e-3 | 2.325e-3 | 57     | 173  | 65.2107    | 225.1797 | AAL94650.1   Aldehyde dehydrogenase B                                         |                         |    |    |   |   |   |   |
|         |                        |                      |          |          | 49     | 295  | 71.8241    | 295.0000 |                                                                               |                         |    |    |   |   |   |   |
| FN0455  | -0.538                 | 18.144               | 3.535e-3 | 9.458e-3 | 331    | 547  | 378.6797   | 711.9843 | AAL94651.1   Rubrerythrin                                                     |                         |    |    |   |   |   |   |
|         |                        |                      |          |          | 351    | 585  | 514.4953   | 585.0000 |                                                                               |                         |    |    |   |   |   |   |
| FN0456  | 1.418                  | 9.004                | 1.978e-5 | 9.115e-6 | 34     | 9    | 38.8976    | 11.7145  | AAL94652.1   Hypothetical cytosolic protein                                   |                         |    |    |   |   |   |   |
|         |                        |                      |          |          | 24     | 16   | 35.1792    | 16.0000  |                                                                               |                         |    |    |   |   |   |   |
| FN0458  | -0.163                 | 5.910                |          |          |        | 8    |            | 10.4129  | AAL94654.1   Hypothetical Exported Protein                                    |                         |    |    |   |   |   |   |
|         |                        |                      |          |          | 5      | 6    | 7.3290     | 6.0000   |                                                                               |                         |    |    |   |   |   |   |
| FN0460  | 0.770                  | 8.427                | 5.348e-3 | 1.637e-2 | 18     | 8    | 20.5929    | 10.4129  | AAL94656.1   Delta-aminolevulinic acid dehydratase                            |                         |    |    |   |   |   |   |
|         |                        |                      |          |          | 19     | 18   | 27.8502    | 18.0000  |                                                                               |                         |    |    |   |   |   |   |
| FN0461  | 0.038                  | 15.636               | 1.155e-1 | 5.651e-1 | 187    | 177  | 213.9369   | 230.3861 | AAL94657.1   Probable sigma(54) modulation protein                            |                         |    |    |   |   |   |   |
|         |                        |                      |          |          | 166    | 215  | 243.3226   | 215.0000 |                                                                               |                         |    |    |   |   |   |   |
| FN0462  | -2.470                 | 10.980               | 2.488e-3 | 6.106e-3 | 18     | 98   | 20.5929    | 127.5584 | AAL94658.1   DNA mismatch repair protein mutL                                 |                         |    |    |   |   |   |   |
|         |                        |                      |          |          | 12     | 84   | 17.5896    | 84.0000  |                                                                               |                         |    |    |   |   |   |   |
| FN0465  | -0.644                 | 14.340               | 1.392e-2 | 5.177e-2 | 104    | 166  | 118.9809   | 216.0683 | AAL94661.1   Hypothetical protein                                             |                         |    |    |   |   |   |   |
|         |                        |                      |          |          | 76     | 144  | 111.4007   | 144.0000 |                                                                               |                         |    |    |   |   |   |   |

Show detected proteins only  
 Show all proteins  
 Filter by category:

Proteins found: 1344

Test Cutoff

| Signif | Direction | Applies To   |
|--------|-----------|--------------|
| yes    | +         | ratios, bars |
| no     | n/a       | bars         |
| yes    | -         | ratios, bars |
| yes    | +         | p-, q-Values |
| yes    | -         | p-, q-Values |

Fn Summary Table FnPg vs Fn FnSg vs Fn FnPgSg vs Fn FnPgSg vs FnPg FnSg vs FnPg FnPgSg vs FnSg Fn Coverage

| Protein | FnPgSg vs FnSg         |                      |          |          | Raw    |      | Normalized |           | Description                                        | Log <sub>2</sub> Ratios |    |    |   |   |   |   |
|---------|------------------------|----------------------|----------|----------|--------|------|------------|-----------|----------------------------------------------------|-------------------------|----|----|---|---|---|---|
|         | Log <sub>2</sub> Ratio | Log <sub>2</sub> Sum | q-Value  | p-Value  | FnPgSg | FnSg | FnPgSg     | FnSg      |                                                    | -6                      | -4 | -2 | 0 | 2 | 4 | 6 |
| FN0466  | -0.408                 | 17.650               | 9.611e-3 | 3.34e-2  | 295    | 446  | 337.4940   | 580.5210  | AAL94662.1  Lysyl-tRNA synthetase                  |                         |    |    |   |   |   |   |
|         |                        |                      |          |          | 307    | 464  | 450.0002   | 464.0000  |                                                    |                         |    |    |   |   |   |   |
| FN0469  |                        |                      |          |          |        |      |            |           | AAL94665.1  Copper homeostasis protein cutC        |                         |    |    |   |   |   |   |
|         |                        |                      |          |          |        | 4    |            | 4.0000    |                                                    |                         |    |    |   |   |   |   |
| FN0470  | 0.147                  | 17.827               | 4.969e-2 | 2.213e-1 | 427    | 310  | 488.5082   | 403.5011  | AAL94666.1  Putative efflux pump component MtrF    |                         |    |    |   |   |   |   |
|         |                        |                      |          |          | 359    | 513  | 526.2217   | 513.0000  |                                                    |                         |    |    |   |   |   |   |
| FN0472  | 0.717                  | 25.743               | 1.814e-7 | 9.116e-9 | 8444   | 4554 | 9660.3359  | 5927.5618 | AAL94668.1  Flavodoxin                             |                         |    |    |   |   |   |   |
|         |                        |                      |          |          | 6518   | 5764 | 9554.0753  | 5764.0000 |                                                    |                         |    |    |   |   |   |   |
| FN0474  |                        |                      |          |          |        |      |            |           | AAL94670.1  Acriflavin resistance protein B        |                         |    |    |   |   |   |   |
|         |                        |                      |          |          |        | 4    |            | 5.2065    |                                                    |                         |    |    |   |   |   |   |
| FN0475  | -0.961                 | 9.059                | 1.569e-3 | 3.417e-3 | 11     | 28   | 12.5845    | 36.4453   | AAL94671.1  MIAB protein                           |                         |    |    |   |   |   |   |
|         |                        |                      |          |          | 14     | 28   | 20.5212    | 28.0000   |                                                    |                         |    |    |   |   |   |   |
| FN0476  | 0.040                  | 12.776               | 1.414e-1 | 7.123e-1 | 69     | 57   | 78.9393    | 74.1921   | AAL94672.1  Transcription termination factor rho   |                         |    |    |   |   |   |   |
|         |                        |                      |          |          | 62     | 91   | 90.8795    | 91.0000   |                                                    |                         |    |    |   |   |   |   |
| FN0477  | -1.470                 | 8.715                | 3.416e-4 | 4.569e-4 | 10     | 24   | 11.4405    | 31.2388   | AAL94673.1  Cell wall endopeptidase family M23/M37 |                         |    |    |   |   |   |   |
|         |                        |                      |          |          | 9      | 37   | 13.1922    | 37.0000   |                                                    |                         |    |    |   |   |   |   |
| FN0478  | -1.541                 | 8.528                | 4.136e-4 | 5.812e-4 | 12     | 25   | 13.7286    | 32.5404   | AAL94674.1  GcpE protein                           |                         |    |    |   |   |   |   |
|         |                        |                      |          |          | 6      | 33   | 8.7948     | 33.0000   |                                                    |                         |    |    |   |   |   |   |
| FN0479  |                        |                      |          |          |        |      |            |           | AAL94675.1  RNA polymerase sigma-E factor          |                         |    |    |   |   |   |   |
|         |                        |                      |          |          |        | 9    |            | 11.7145   |                                                    |                         |    |    |   |   |   |   |
| FN0480  |                        |                      |          |          |        |      |            |           | AAL94676.1  unknown                                |                         |    |    |   |   |   |   |
|         |                        |                      |          |          |        |      | 4          | 4.0000    |                                                    |                         |    |    |   |   |   |   |
| FN0481  |                        |                      |          |          |        |      |            |           | AAL94677.1  unknown                                |                         |    |    |   |   |   |   |
|         |                        |                      |          |          |        |      | 3          | 3.9048    |                                                    |                         |    |    |   |   |   |   |
| FN0482  |                        |                      |          |          |        |      |            |           | AAL94678.1  LSU ribosomal protein L31P             |                         |    |    |   |   |   |   |
|         |                        |                      |          |          |        | 59   |            | 67.4988   |                                                    |                         |    |    |   |   |   |   |
| FN0483  | 0.988                  | 12.842               | 4.783e-5 | 3.29e-5  | 111    | 52   | 126.9893   | 67.6841   | AAL94679.1  Uracil phosphoribosyltransferase       |                         |    |    |   |   |   |   |
|         |                        |                      |          |          | 78     | 54   | 114.3323   | 54.0000   |                                                    |                         |    |    |   |   |   |   |
| FN0484  | -0.994                 | 5.382                |          |          | 4      | 7    | 4.5762     | 9.1113    | AAL94680.1  Lipase                                 |                         |    |    |   |   |   |   |
|         |                        |                      |          |          |        |      |            |           |                                                    |                         |    |    |   |   |   |   |
| FN0487  | 0.010                  | 20.575               | 1.767e-1 | 9.282e-1 | 1065   | 1078 | 1218.4104  | 1403.1427 | AAL94683.1  2-hydroxyglutarate dehydrogenase       |                         |    |    |   |   |   |   |
|         |                        |                      |          |          | 880    | 1087 | 1289.9028  | 1087.0000 |                                                    |                         |    |    |   |   |   |   |

Show detected proteins only  
 Show all proteins  
 Filter by category:

Proteins found: 1344

Enter (or paste) list of ORFs

Find ORFs

Test Cutoff

q-Value .005

p-Value

| Signif | Direction | Applies To   |
|--------|-----------|--------------|
| yes    | +         | ratios, bars |
| no     | n/a       | bars         |
| yes    | -         | ratios, bars |
| yes    | +         | p-, q-Values |
| yes    | -         |              |

Dot Plots Dot Plots

Fn Summary Table FnPg vs Fn FnSg vs Fn FnPgSg vs Fn FnPgSg vs FnPg FnSg vs FnPg FnPgSg vs FnSg Fn Coverage

| Protein | FnPgSg vs FnSg         |                      |          |          | Raw    |      | Normalized |           | Description                                                 | Log <sub>2</sub> Ratios |    |    |   |   |   |   |
|---------|------------------------|----------------------|----------|----------|--------|------|------------|-----------|-------------------------------------------------------------|-------------------------|----|----|---|---|---|---|
|         | Log <sub>2</sub> Ratio | Log <sub>2</sub> Sum | q-Value  | p-Value  | FnPgSg | FnSg | FnPgSg     | FnSg      |                                                             | -6                      | -4 | -2 | 0 | 2 | 4 | 6 |
| FN0488  | -0.236                 | 24.136               | 2.745e-2 | 1.127e-1 | 3228   | 4005 | 3692.9849  | 5212.9743 | AAL94684.1  NAD-specific glutamate dehydrogenase            |                         |    |    |   |   |   |   |
|         |                        |                      |          |          | 2879   | 4107 | 4220.0342  | 4107.0000 |                                                             |                         |    |    |   |   |   |   |
| FN0489  | 2.057                  | 8.397                |          |          | 36     |      | 41.1857    |           | AAL94685.1  Prolipoprotein diacylglycerol transferase       |                         |    |    |   |   |   |   |
|         |                        |                      |          |          | 23     | 9    | 33.7134    | 9.0000    |                                                             |                         |    |    |   |   |   |   |
| FN0491  | -2.248                 | 13.004               | 2.198e-3 | 5.202e-3 | 33     | 123  | 37.7536    | 160.0988  | AAL94687.1  Alanine racemase                                |                         |    |    |   |   |   |   |
|         |                        |                      |          |          | 31     | 235  | 45.4398    | 235.0000  |                                                             |                         |    |    |   |   |   |   |
| FN0493  | -1.495                 | 6.173                | 1.472e-2 | 5.518e-2 | 5      | 15   | 5.7202     | 19.5242   | AAL94689.1  Hypothetical protein                            |                         |    |    |   |   |   |   |
|         |                        |                      |          |          | 3      | 9    | 4.3974     | 9.0000    |                                                             |                         |    |    |   |   |   |   |
| FN0494  | 1.982                  | 15.979               | 3.216e-5 | 1.793e-5 | 409    | 69   | 467.9154   | 89.8115   | AAL94690.1  Short chain dehydrogenase                       |                         |    |    |   |   |   |   |
|         |                        |                      |          |          | 370    | 166  | 542.3455   | 166.0000  |                                                             |                         |    |    |   |   |   |   |
| FN0495  | -0.360                 | 26.067               | 8.608e-6 | 2.227e-6 | 6337   | 7402 | 7249.8281  | 9634.5658 | AAL94691.1  Acetyl-CoA acetyltransferase                    |                         |    |    |   |   |   |   |
|         |                        |                      |          |          | 5153   | 9364 | 7553.2602  | 9364.0000 |                                                             |                         |    |    |   |   |   |   |
| FN0497  |                        |                      |          |          |        |      |            |           | AAL94693.1  Plasmid addiction system poison protein         |                         |    |    |   |   |   |   |
|         |                        |                      |          |          | 5      |      | 7.3290     |           |                                                             |                         |    |    |   |   |   |   |
| FN0501  | -1.656                 | 16.791               | 3.928e-4 | 5.439e-4 | 156    | 420  | 178.4714   | 546.6790  | AAL94697.1  Ornithine decarboxylase                         |                         |    |    |   |   |   |   |
|         |                        |                      |          |          | 137    | 649  | 200.8144   | 649.0000  |                                                             |                         |    |    |   |   |   |   |
| FN0502  | 0.155                  | 9.203                |          |          | 23     |      | 26.3131    |           | AAL94698.1  Phosphoheptose isomerase                        |                         |    |    |   |   |   |   |
|         |                        |                      |          |          | 17     | 23   | 24.9186    | 23.0000   |                                                             |                         |    |    |   |   |   |   |
| FN0503  | 0.087                  | 11.453               | 4.988e-4 | 7.451e-4 | 48     | 39   | 54.9143    | 50.7630   | AAL94699.1  Transcriptional regulatory protein, LYSR family |                         |    |    |   |   |   |   |
|         |                        |                      |          |          | 37     | 52   | 54.2345    | 52.0000   |                                                             |                         |    |    |   |   |   |   |
| FN0504  |                        |                      |          |          |        |      |            |           | AAL94700.1  Arginine permease                               |                         |    |    |   |   |   |   |
|         |                        |                      |          |          | 3      |      | 4.3974     |           |                                                             |                         |    |    |   |   |   |   |
| FN0505  | -0.205                 | 9.723                | 8.974e-2 | 4.265e-1 | 23     | 18   | 26.3131    | 23.4291   | AAL94701.1  Anthranilate synthase component II              |                         |    |    |   |   |   |   |
|         |                        |                      |          |          | 19     | 39   | 27.8502    | 39.0000   |                                                             |                         |    |    |   |   |   |   |
| FN0506  | 1.493                  | 14.740               | 1.575e-3 | 3.434e-3 | 279    | 67   | 319.1892   | 87.2083   | AAL94702.1  Arginyl-tRNA synthetase                         |                         |    |    |   |   |   |   |
|         |                        |                      |          |          | 161    | 110  | 235.9936   | 110.0000  |                                                             |                         |    |    |   |   |   |   |
| FN0511  | -1.458                 | 10.684               | 1.359e-3 | 2.857e-3 | 21     | 58   | 24.0250    | 75.4938   | AAL94707.1  D-lactate dehydrogenase                         |                         |    |    |   |   |   |   |
|         |                        |                      |          |          | 17     | 59   | 24.9186    | 59.0000   |                                                             |                         |    |    |   |   |   |   |
| FN0512  | -0.051                 | 15.650               | 4.334e-2 | 1.896e-1 | 196    | 171  | 224.2333   | 222.5764  | AAL94708.1  Flavoprotein                                    |                         |    |    |   |   |   |   |
|         |                        |                      |          |          | 151    | 239  | 221.3356   | 239.0000  |                                                             |                         |    |    |   |   |   |   |
| FN0513  | 1.549                  | 9.899                | 2.193e-4 | 2.491e-4 | 45     | 17   | 51.4821    | 22.1275   | AAL94709.1  Flavodoxin                                      |                         |    |    |   |   |   |   |
|         |                        |                      |          |          | 37     | 14   | 54.2345    | 14.0000   |                                                             |                         |    |    |   |   |   |   |

Show detected proteins only  
 Show all proteins  
 Filter by category:

Proteins found: 1344

Enter (or paste) list of ORFs

Find ORFs

Test Cutoff

q-Value

p-Value

| Signif | Direction | Applies To   |
|--------|-----------|--------------|
| yes    | +         | ratios, bars |
| no     | n/a       | bars         |
| yes    | -         | ratios, bars |
| yes    | +         | p-, q-Values |
| yes    | -         | p-, q-Values |

Dot Plots  Dot Plots

Fn Summary Table FnPg vs Fn FnSg vs Fn FnPgSg vs Fn FnPgSg vs FnPg FnSg vs FnPg FnPgSg vs FnSg Fn Coverage

| Protein | FnPgSg vs FnSg         |                      |          |          | Raw    |      | Normalized |          | Description                                                    | Log <sub>2</sub> Ratios |    |    |   |   |   |   |
|---------|------------------------|----------------------|----------|----------|--------|------|------------|----------|----------------------------------------------------------------|-------------------------|----|----|---|---|---|---|
|         | Log <sub>2</sub> Ratio | Log <sub>2</sub> Sum | q-Value  | p-Value  | FnPgSg | FnSg | FnPgSg     | FnSg     |                                                                | -6                      | -4 | -2 | 0 | 2 | 4 | 6 |
| FN0515  |                        |                      |          |          |        | 4    |            | 5.2065   | AAL94711.1  Acriflavin resistance protein D                    |                         |    |    |   |   |   |   |
|         |                        |                      |          |          |        | 10   |            | 10.0000  |                                                                |                         |    |    |   |   |   |   |
| FN0517  |                        |                      |          |          |        | 10   |            | 13.0162  | AAL94713.1  Outer membrane protein toIC                        |                         |    |    |   |   |   |   |
|         |                        |                      |          |          |        | 8    |            | 8.0000   |                                                                |                         |    |    |   |   |   |   |
| FN0519  | -1.010                 | 5.284                |          |          |        | 9    |            | 11.7145  | AAL94715.1  Hypothetical exported 24-amino acid repeat protein |                         |    |    |   |   |   | ■ |
|         |                        |                      |          |          | 3      | 6    | 4.3974     | 6.0000   |                                                                |                         |    |    |   |   |   |   |
| FN0522  | -1.908                 | 6.182                |          |          |        | 10   |            | 13.0162  | AAL94718.1  Exonuclease SBCC                                   |                         |    |    |   |   |   | ■ |
|         |                        |                      |          |          | 3      | 20   | 4.3974     | 20.0000  |                                                                |                         |    |    |   |   |   |   |
| FN0523  |                        |                      |          |          |        | 5    |            | 6.5081   | AAL94719.1  Exonuclease SBCD                                   |                         |    |    |   |   |   |   |
|         |                        |                      |          |          |        | 9    |            | 9.0000   |                                                                |                         |    |    |   |   |   |   |
| FN0524  | 1.057                  | 7.477                | 3.061e-3 | 7.872e-3 | 17     | 5    | 19.4488    | 6.5081   | AAL94720.1  DNA helicase II                                    |                         |    |    |   |   |   | ■ |
|         |                        |                      |          |          | 13     | 12   | 19.0554    | 12.0000  |                                                                |                         |    |    |   |   |   |   |
| FN0525  | -0.848                 | 14.972               | 6.896e-3 | 2.242e-2 | 108    | 219  | 123.5571   | 285.0540 | AAL94721.1  Penicillin-binding protein                         |                         |    |    |   |   |   | ■ |
|         |                        |                      |          |          | 98     | 196  | 143.6483   | 196.0000 |                                                                |                         |    |    |   |   |   |   |
| FN0526  | -0.443                 | 11.386               | 4.394e-3 | 1.267e-2 | 34     | 42   | 38.8976    | 54.6679  | AAL94722.1  Florfenicol resistance protein                     |                         |    |    |   |   |   | ■ |
|         |                        |                      |          |          | 34     | 66   | 49.8372    | 66.0000  |                                                                |                         |    |    |   |   |   |   |
| FN0527  | -2.095                 | 9.163                | 1.056e-3 | 2.084e-3 | 10     | 33   | 11.4405    | 42.9533  | AAL94723.1  Alanyl-tRNA synthetase                             |                         |    |    |   |   |   | ■ |
|         |                        |                      |          |          | 8      | 56   | 11.7264    | 56.0000  |                                                                |                         |    |    |   |   |   |   |
| FN0528  | 5.036                  | 14.918               | 2e-4     | 2.185e-4 | 951    | 28   | 1087.9890  | 36.4453  | AAL94724.1  Cold shock protein                                 |                         |    |    |   |   |   | ■ |
|         |                        |                      |          |          | 633    | 25   | 927.8505   | 25.0000  |                                                                |                         |    |    |   |   |   |   |
| FN0535  | 1.268                  | 11.141               | 2.193e-4 | 2.491e-4 | 61     | 24   | 69.7869    | 31.2388  | AAL94731.1  Hypothetical protein                               |                         |    |    |   |   |   | ■ |
|         |                        |                      |          |          | 53     | 30   | 77.6873    | 30.0000  |                                                                |                         |    |    |   |   |   |   |
| FN0536  | 0.517                  | 15.709               | 9.179e-4 | 1.732e-3 | 242    | 159  | 276.8595   | 206.9570 | AAL94732.1  DNA polymerase III, beta chain                     |                         |    |    |   |   |   | ■ |
|         |                        |                      |          |          | 189    | 180  | 277.0359   | 180.0000 |                                                                |                         |    |    |   |   |   |   |
| FN0540  | -0.270                 | 10.828               | 1.773e-2 | 6.856e-2 | 32     | 32   | 36.6095    | 41.6517  | AAL94736.1  Glutamate-1-semialdehyde 2,1-aminomutase           |                         |    |    |   |   |   | ■ |
|         |                        |                      |          |          | 28     | 52   | 41.0424    | 52.0000  |                                                                |                         |    |    |   |   |   |   |
| FN0541  |                        |                      |          |          |        | 6    |            | 7.8097   | AAL94737.1  polysaccharide deacetylase                         |                         |    |    |   |   |   |   |
|         |                        |                      |          |          |        | 11   |            | 11.0000  |                                                                |                         |    |    |   |   |   |   |
| FN0542  | -0.813                 | 9.376                |          |          | 17     | 31   | 19.4488    | 40.3501  | AAL94738.1  Beta 1,4 glucosyltransferase                       |                         |    |    |   |   |   | ■ |
|         |                        |                      |          |          |        | 28   |            | 28.0000  |                                                                |                         |    |    |   |   |   |   |
| FN0543  | 0.674                  | 9.063                | 1.376e-3 | 2.901e-3 | 28     | 12   | 32.0333    | 15.6194  | AAL94739.1  Lipopolysaccharide heptosyltransferase-1           |                         |    |    |   |   |   | ■ |
|         |                        |                      |          |          | 18     | 21   | 26.3844    | 21.0000  |                                                                |                         |    |    |   |   |   |   |

Show detected proteins only  
 Show all proteins  
 Filter by category:

Proteins found: 1344

Test Cutoff

| Signif | Direction | Applies To   |
|--------|-----------|--------------|
| ■      | +         | ratios, bars |
| ■      | n/a       | bars         |
| ■      | -         | ratios, bars |
| ■      | +         | p-, q-Values |
| ■      | -         |              |

Fn Summary Table FnPg vs Fn FnSg vs Fn FnPgSg vs Fn FnPgSg vs FnPg FnSg vs FnPg FnPgSg vs FnSg Fn Coverage

| Protein | FnPgSg vs FnSg         |                      |          |          | Raw    |      | Normalized |          | Description                                                                         | Log <sub>2</sub> Ratios |    |    |   |   |   |   |
|---------|------------------------|----------------------|----------|----------|--------|------|------------|----------|-------------------------------------------------------------------------------------|-------------------------|----|----|---|---|---|---|
|         | Log <sub>2</sub> Ratio | Log <sub>2</sub> Sum | q-Value  | p-Value  | FnPgSg | FnSg | FnPgSg     | FnSg     |                                                                                     | -6                      | -4 | -2 | 0 | 2 | 4 | 6 |
| FN0547  | -0.407                 | 16.976               | 1.557e-2 | 5.891e-2 | 326    | 304  | 372.9594   | 395.6914 | AAL94743.1  RecA protein                                                            |                         |    |    |   |   |   |   |
|         |                        |                      |          |          | 171    | 431  | 250.6516   | 431.0000 |                                                                                     |                         |    |    |   |   |   |   |
| FN0549  |                        |                      |          |          |        |      |            |          | AAL94745.1  O-sialoglycoprotein endopeptidase                                       |                         |    |    |   |   |   |   |
|         |                        |                      |          |          |        | 13   |            | 13.0000  |                                                                                     |                         |    |    |   |   |   |   |
| FN0550  | 0.685                  | 8.043                |          |          | 18     | 12   | 20.5929    | 15.6194  | AAL94746.1  hypothetical Protein                                                    |                         |    |    |   |   |   |   |
|         |                        |                      |          |          |        | 10   |            | 10.0000  |                                                                                     |                         |    |    |   |   |   |   |
| FN0552  | -1.794                 | 7.797                |          |          | 7      | 15   | 8.0083     | 19.5242  | AAL94748.1  Serine racemase                                                         |                         |    |    |   |   |   |   |
|         |                        |                      |          |          |        | 36   |            | 36.0000  |                                                                                     |                         |    |    |   |   |   |   |
| FN0553  | -1.390                 | 14.316               | 3.49e-3  | 9.303e-3 | 85     | 144  | 97.2440    | 187.4328 | AAL94749.1  D-serine dehydratase                                                    |                         |    |    |   |   |   |   |
|         |                        |                      |          |          | 54     | 275  | 79.1531    | 275.0000 |                                                                                     |                         |    |    |   |   |   |   |
| FN0554  | -2.684                 | 6.243                |          |          | 3      | 17   | 3.4321     | 22.1275  | AAL94750.1  D-serine permease                                                       |                         |    |    |   |   |   |   |
|         |                        |                      |          |          |        | 22   |            | 22.0000  |                                                                                     |                         |    |    |   |   |   |   |
| FN0555  |                        |                      |          |          |        | 6    |            | 7.8097   | AAL94751.1  Transcriptional regulator, MerR family                                  |                         |    |    |   |   |   |   |
|         |                        |                      |          |          |        |      |            |          |                                                                                     |                         |    |    |   |   |   |   |
| FN0556  | -1.304                 | 9.886                | 1.066e-3 | 2.11e-3  | 15     | 42   | 17.1607    | 54.6679  | AAL94752.1  unknown                                                                 |                         |    |    |   |   |   |   |
|         |                        |                      |          |          | 15     | 42   | 21.9870    | 42.0000  |                                                                                     |                         |    |    |   |   |   |   |
| FN0557  | -3.213                 | 12.672               | 3.976e-3 | 1.105e-2 | 31     | 242  | 35.4655    | 314.9912 | AAL94753.1  unknown                                                                 |                         |    |    |   |   |   |   |
|         |                        |                      |          |          | 12     | 177  | 17.5896    | 177.0000 |                                                                                     |                         |    |    |   |   |   |   |
| FN0558  | -1.801                 | 11.770               | 4.484e-3 | 1.303e-2 | 31     | 105  | 35.4655    | 136.6697 | AAL94754.1  TraT complement resistance protein precursor                            |                         |    |    |   |   |   |   |
|         |                        |                      |          |          | 19     | 84   | 27.8502    | 84.0000  |                                                                                     |                         |    |    |   |   |   |   |
| FN0559  | -0.515                 | 14.682               | 5.467e-3 | 1.683e-2 | 100    | 151  | 114.4047   | 196.5441 | AAL94755.1  Phosphoglucomutase                                                      |                         |    |    |   |   |   |   |
|         |                        |                      |          |          | 107    | 191  | 156.8405   | 191.0000 |                                                                                     |                         |    |    |   |   |   |   |
| FN0560  |                        |                      |          |          |        |      |            |          | AAL94756.1  Oxygen-independent coproporphyrinogen III oxidase                       |                         |    |    |   |   |   |   |
|         |                        |                      |          |          |        | 6    |            | 6.0000   |                                                                                     |                         |    |    |   |   |   |   |
| FN0561  | 0.048                  | 9.680                | 8.862e-2 | 4.206e-1 | 24     | 21   | 27.4571    | 27.3339  | AAL94757.1  Proline synthetase associated protein                                   |                         |    |    |   |   |   |   |
|         |                        |                      |          |          | 21     | 29   | 30.7818    | 29.0000  |                                                                                     |                         |    |    |   |   |   |   |
| FN0562  | 0.699                  | 14.114               | 1.092e-3 | 2.181e-3 | 157    | 93   | 179.6154   | 121.0503 | AAL94758.1  Hypothetical cytosolic protein                                          |                         |    |    |   |   |   |   |
|         |                        |                      |          |          | 109    | 88   | 159.7720   | 88.0000  |                                                                                     |                         |    |    |   |   |   |   |
| FN0563  | -0.190                 | 6.821                | 8.957e-2 | 4.256e-1 | 11     | 9    | 12.5845    | 11.7145  | AAL94759.1  putative tRNA (5-methylaminomethyl-2-thiouridylate) - methyltransferase |                         |    |    |   |   |   |   |
|         |                        |                      |          |          | 5      | 11   | 7.3290     | 11.0000  |                                                                                     |                         |    |    |   |   |   |   |
| FN0574  |                        |                      |          |          | 4      |      | 4.5762     |          | AAL94770.1  Hypothetical cytosolic protein                                          |                         |    |    |   |   |   |   |
|         |                        |                      |          |          |        |      |            |          |                                                                                     |                         |    |    |   |   |   |   |

Show detected proteins only  
 Show all proteins  
 Filter by category:

Proteins found: 1344

Enter (or paste) list of ORFs

Find ORFs

Test Cutoff

q-Value

p-Value

.005

| Signif | Direction | Applies To   |
|--------|-----------|--------------|
| yes    | +         | ratios, bars |
| no     | n/a       | bars         |
| yes    | -         | ratios, bars |
| yes    | +         | p-, q-Values |
| yes    | -         | p-, q-Values |

Dot Plots Dot Plots

Fn Summary Table FnPg vs Fn FnSg vs Fn FnPgSg vs Fn FnPgSg vs FnPg FnSg vs FnPg FnPgSg vs FnSg Fn Coverage

| Protein | FnPgSg vs FnSg         |                      |          |          | Raw    |      | Normalized |          | Description                                                                       | Log <sub>2</sub> Ratios |    |    |   |   |   |   |
|---------|------------------------|----------------------|----------|----------|--------|------|------------|----------|-----------------------------------------------------------------------------------|-------------------------|----|----|---|---|---|---|
|         | Log <sub>2</sub> Ratio | Log <sub>2</sub> Sum | q-Value  | p-Value  | FnPgSg | FnSg | FnPgSg     | FnSg     |                                                                                   | -6                      | -4 | -2 | 0 | 2 | 4 | 6 |
| FN0576  | -1.209                 | 11.617               | 6.242e-3 | 1.987e-2 | 26     | 81   | 29.7452    | 105.4309 | AAL94772.1  hypothetical protein                                                  |                         |    |    |   |   |   |   |
|         |                        |                      |          |          | 30     | 65   | 43.9740    | 65.0000  |                                                                                   | ■                       |    |    |   |   |   |   |
| FN0577  |                        |                      |          |          |        | 13   |            | 16.9210  | AAL94773.1  Hypothetical protein                                                  |                         |    |    |   |   |   |   |
|         |                        |                      |          |          |        | 13   |            | 13.0000  |                                                                                   |                         |    |    |   |   |   |   |
| FN0579  | -0.643                 | 18.026               | 1.183e-2 | 4.285e-2 | 350    | 588  | 400.4166   | 765.3505 | AAL94775.1  Hypothetical cytosolic protein                                        |                         |    |    |   |   |   |   |
|         |                        |                      |          |          | 291    | 526  | 426.5474   | 526.0000 |                                                                                   | ■                       |    |    |   |   |   |   |
| FN0580  |                        |                      |          |          |        | 7    |            | 9.1113   | AAL94776.1  Penicillin-binding protein                                            |                         |    |    |   |   |   |   |
|         |                        |                      |          |          |        | 12   |            | 12.0000  |                                                                                   |                         |    |    |   |   |   |   |
| FN0581  | -1.092                 | 6.839                |          |          |        | 12   |            | 15.6194  | AAL94777.1  Lipoprotein releasing system transmembrane protein lolE               |                         |    |    |   |   |   |   |
|         |                        |                      |          |          | 5      |      | 7.3290     |          |                                                                                   | ■                       |    |    |   |   |   |   |
| FN0582  | -0.843                 | 9.788                | 7.256e-3 | 2.388e-2 | 26     | 32   | 29.7452    | 41.6517  | AAL94778.1  Lipoprotein releasing system ATP-binding protein lolD                 |                         |    |    |   |   |   |   |
|         |                        |                      |          |          | 10     | 38   | 14.6580    | 38.0000  |                                                                                   | ■                       |    |    |   |   |   |   |
| FN0583  |                        |                      |          |          |        | 7    |            | 9.1113   | AAL94779.1  Hypothetical Exported Protein                                         |                         |    |    |   |   |   |   |
|         |                        |                      |          |          |        | 15   |            | 15.0000  |                                                                                   |                         |    |    |   |   |   |   |
| FN0585  | -1.085                 | 5.473                |          |          | 4      | 8    | 4.5762     | 10.4129  | AAL94781.1  Two-component response regulator czcR                                 |                         |    |    |   |   |   |   |
|         |                        |                      |          |          |        | 9    |            | 9.0000   |                                                                                   | ■                       |    |    |   |   |   |   |
| FN0586  | -1.178                 | 5.567                |          |          | 4      | 9    | 4.5762     | 11.7145  | AAL94782.1  Two-component sensor kinase czcS                                      |                         |    |    |   |   |   |   |
|         |                        |                      |          |          |        | 9    |            | 9.0000   |                                                                                   | ■                       |    |    |   |   |   |   |
| FN0590  | -2.486                 | 8.141                | 1.893e-3 | 4.316e-3 | 6      | 25   | 6.8643     | 32.5404  | AAL94786.1  N-acyl-L-amino acid amidohydrolase                                    |                         |    |    |   |   |   |   |
|         |                        |                      |          |          | 5      | 47   | 7.3290     | 47.0000  |                                                                                   | ■                       |    |    |   |   |   |   |
| FN0592  | -0.508                 | 12.602               | 3.992e-2 | 1.727e-1 | 49     | 93   | 56.0583    | 121.0503 | AAL94788.1  ATP-dependent DNA helicase pcrA                                       |                         |    |    |   |   |   |   |
|         |                        |                      |          |          | 52     | 67   | 76.2215    | 67.0000  |                                                                                   | ■                       |    |    |   |   |   |   |
| FN0593  | 0.348                  | 11.005               | 3.27e-3  | 8.556e-3 | 42     | 31   | 48.0500    | 40.3501  | AAL94789.1  UDP-3-O-[3-hydroxymyristoyl] N-acetylglucosamine deacetylase          |                         |    |    |   |   |   |   |
|         |                        |                      |          |          | 37     | 40   | 54.2345    | 40.0000  |                                                                                   | ■                       |    |    |   |   |   |   |
| FN0594  | -3.691                 | 10.080               |          |          | 8      | 91   | 9.1524     | 118.4471 | AAL94790.1  (3R)-hydroxymyristoyl-[acyl carrier protein] dehydratase              |                         |    |    |   |   |   |   |
|         |                        |                      |          |          |        | 118  |            | 118.0000 |                                                                                   | ■                       |    |    |   |   |   |   |
| FN0595  | 1.664                  | 8.836                | 3.179e-2 | 1.33e-1  | 14     | 10   | 16.0167    | 13.0162  | AAL94791.1  Acyl-[acyl-carrier-protein]-UDP-N-acetylglucosamine O-acyltransferase |                         |    |    |   |   |   |   |
|         |                        |                      |          |          | 41     | 11   | 60.0977    | 11.0000  |                                                                                   | ■                       |    |    |   |   |   |   |
| FN0596  | -0.661                 | 8.220                |          |          | 12     | 18   | 13.7286    | 23.4291  | AAL94792.1  Hypothetical protein                                                  |                         |    |    |   |   |   |   |
|         |                        |                      |          |          |        | 20   |            | 20.0000  |                                                                                   | ■                       |    |    |   |   |   |   |
| FN0597  | -0.918                 | 9.075                | 1.111e-3 | 2.232e-3 | 18     | 26   | 20.5929    | 33.8420  | AAL94793.1  Lipid-A-disaccharide synthase                                         |                         |    |    |   |   |   |   |
|         |                        |                      |          |          | 9      | 30   | 13.1922    | 30.0000  |                                                                                   | ■                       |    |    |   |   |   |   |

Show detected proteins only  
 Show all proteins  
 Filter by category:

Proteins found: 1344

Enter (or paste) list of ORFs

Find ORFs

Test Cutoff

q-Value p-Value

.005

| Signif | Direction | Applies To   |
|--------|-----------|--------------|
| ■      | yes +     | ratios, bars |
| ■      | no n/a    | bars         |
| ■      | yes -     | ratios, bars |
| ■      | yes +     | p-, q-Values |
| ■      | yes -     | p-, q-Values |

Dot Plots Dot Plots

Fn Summary Table FnPg vs Fn FnSg vs Fn FnPgSg vs Fn FnPgSg vs FnPg FnSg vs FnPg FnPgSg vs FnSg Fn Coverage

| Protein | FnPgSg vs FnSg         |                      |          |          | Raw    |      | Normalized |          | Description                                                 | Log <sub>2</sub> Ratios |    |    |   |   |   |   |
|---------|------------------------|----------------------|----------|----------|--------|------|------------|----------|-------------------------------------------------------------|-------------------------|----|----|---|---|---|---|
|         | Log <sub>2</sub> Ratio | Log <sub>2</sub> Sum | q-Value  | p-Value  | FnPgSg | FnSg | FnPgSg     | FnSg     |                                                             | -6                      | -4 | -2 | 0 | 2 | 4 | 6 |
| FN0598  | 0.412                  | 9.072                | 2.045e-3 | 4.748e-3 | 25     | 14   | 28.6012    | 18.2226  | AAL94794.1  Phospholipid-lipopolysaccharide ABC transporter |                         |    |    |   |   |   |   |
|         |                        |                      |          |          | 17     | 22   | 24.9186    | 22.0000  |                                                             |                         |    |    |   |   |   |   |
| FN0600  | 0.166                  | 12.923               | 6.675e-2 | 3.078e-1 | 94     | 61   | 107.5405   | 79.3986  | AAL94796.1  Hypothetical protein                            |                         |    |    |   |   |   |   |
|         |                        |                      |          |          | 54     | 87   | 79.1531    | 87.0000  |                                                             |                         |    |    |   |   |   |   |
| FN0602  | 0.567                  | 13.502               | 1.503e-4 | 1.489e-4 | 110    | 63   | 125.8452   | 82.0018  | AAL94798.1  Hypothetical protein                            |                         |    |    |   |   |   |   |
|         |                        |                      |          |          | 93     | 95   | 136.3193   | 95.0000  |                                                             |                         |    |    |   |   |   |   |
| FN0603  |                        |                      |          |          |        | 11   |            | 14.3178  | AAL94799.1  Transcriptional regulatory protein, LYSR family |                         |    |    |   |   |   |   |
|         |                        |                      |          |          |        | 12   |            | 12.0000  |                                                             |                         |    |    |   |   |   |   |
| FN0605  |                        |                      |          |          |        |      |            |          | AAL94801.1  Aspartate aminotransferase                      |                         |    |    |   |   |   |   |
|         |                        |                      |          |          | 5      |      | 7.3290     |          |                                                             |                         |    |    |   |   |   |   |
| FN0608  | -1.551                 | 12.941               | 4.05e-8  | 1.022e-9 | 47     | 118  | 53.7702    | 153.5908 | AAL94804.1  Exoribonuclease II                              |                         |    |    |   |   |   |   |
|         |                        |                      |          |          | 34     | 150  | 49.8372    | 150.0000 |                                                             |                         |    |    |   |   |   |   |
| FN0609  |                        |                      |          |          |        |      |            |          | AAL94805.1  Small protein B                                 |                         |    |    |   |   |   |   |
|         |                        |                      |          |          |        | 11   |            | 11.0000  |                                                             |                         |    |    |   |   |   |   |
| FN0610  | 0.163                  | 15.319               | 2.146e-2 | 8.568e-2 | 201    | 153  | 229.9535   | 199.1473 | AAL94806.1  unknown                                         |                         |    |    |   |   |   |   |
|         |                        |                      |          |          | 135    | 183  | 197.8828   | 183.0000 |                                                             |                         |    |    |   |   |   |   |
| FN0611  | -0.822                 | 18.665               | 2.054e-4 | 2.268e-4 | 471    | 612  | 538.8463   | 796.5893 | AAL94807.1  Threonyl-tRNA synthetase                        |                         |    |    |   |   |   |   |
|         |                        |                      |          |          | 294    | 918  | 430.9448   | 918.0000 |                                                             |                         |    |    |   |   |   |   |
| FN0612  | 1.108                  | 12.667               | 2.04e-2  | 8.069e-2 | 66     | 36   | 75.5071    | 46.8582  | AAL94808.1  Hypothetical protein                            |                         |    |    |   |   |   |   |
|         |                        |                      |          |          | 110    | 63   | 161.2378   | 63.0000  |                                                             |                         |    |    |   |   |   |   |
| FN0614  |                        |                      |          |          |        |      |            |          | AAL94810.1  Export ABC transporter                          |                         |    |    |   |   |   |   |
|         |                        |                      |          |          |        | 3    |            | 3.0000   |                                                             |                         |    |    |   |   |   |   |
| FN0616  |                        |                      |          |          | 50     |      | 57.2024    |          | AAL94812.1  Hypothetical protein                            |                         |    |    |   |   |   |   |
|         |                        |                      |          |          | 22     |      | 32.2476    |          |                                                             |                         |    |    |   |   |   |   |
| FN0617  | 0.904                  | 14.207               | 8.709e-6 | 2.273e-6 | 170    | 73   | 194.4881   | 95.0180  | AAL94813.1  DNA polymerase III, beta chain                  |                         |    |    |   |   |   |   |
|         |                        |                      |          |          | 124    | 106  | 181.7590   | 106.0000 |                                                             |                         |    |    |   |   |   |   |
| FN0618  | -0.283                 | 12.874               | 5.864e-2 | 2.664e-1 | 72     | 90   | 82.3714    | 117.1455 | AAL94814.1  Spermidine/putrescine-binding protein           |                         |    |    |   |   |   |   |
|         |                        |                      |          |          | 51     | 74   | 74.7557    | 74.0000  |                                                             |                         |    |    |   |   |   |   |
| FN0619  | 0.277                  | 7.746                |          |          |        | 12   |            | 15.6194  | AAL94815.1  Small-conductance mechanosensitive channel      |                         |    |    |   |   |   |   |
|         |                        |                      |          |          |        | 11   | 16.1238    | 11.0000  |                                                             |                         |    |    |   |   |   |   |
| FN0621  | 0.537                  | 11.395               | 2.307e-2 | 9.287e-2 | 67     | 37   | 76.6512    | 48.1598  | AAL94817.1  4-hydroxybutyrate coenzyme A transferase        |                         |    |    |   |   |   |   |
|         |                        |                      |          |          | 33     | 38   | 48.3714    | 38.0000  |                                                             |                         |    |    |   |   |   |   |

Show detected proteins only  
 Show all proteins  
 Filter by category:  
 GO: amino acid transport

Proteins found:  
 1344

Enter (or paste) list of ORFs

| Test    | Cutoff |
|---------|--------|
| q-Value | .005   |
| p-Value |        |

| Signif | Direction | Applies To   |
|--------|-----------|--------------|
| yes    | +         | ratios, bars |
| no     | n/a       | bars         |
| yes    | -         | ratios, bars |
| yes    | +         | p-, q-Values |
| yes    | -         | p-, q-Values |



Fn Summary Table FnPg vs Fn FnSg vs Fn FnPgSg vs Fn FnPgSg vs FnPg FnSg vs FnPg FnPgSg vs FnSg Fn Coverage

| Protein | FnPgSg vs FnSg         |                      |          |          | Raw    |      | Normalized |          | Description                                                                  | Log <sub>2</sub> Ratios |    |    |   |   |   |   |
|---------|------------------------|----------------------|----------|----------|--------|------|------------|----------|------------------------------------------------------------------------------|-------------------------|----|----|---|---|---|---|
|         | Log <sub>2</sub> Ratio | Log <sub>2</sub> Sum | q-Value  | p-Value  | FnPgSg | FnSg | FnPgSg     | FnSg     |                                                                              | -6                      | -4 | -2 | 0 | 2 | 4 | 6 |
| FN0622  | -4.367                 | 8.699                | 1.66e-3  | 3.674e-3 | 4      | 57   | 4.5762     | 74.1921  | AAL94818.1  8-oxoguanine DNA glycosylase                                     |                         |    |    |   |   |   |   |
|         |                        |                      |          |          | 3      | 111  | 4.3974     | 111.0000 |                                                                              |                         |    |    |   |   |   |   |
| FN0625  | 1.618                  | 9.431                |          |          | 51     |      | 58.3464    |          | AAL94821.1  Aspartate aminotransferase                                       |                         |    |    |   |   |   |   |
|         |                        |                      |          |          | 23     | 15   | 33.7134    | 15.0000  |                                                                              |                         |    |    |   |   |   |   |
| FN0626  |                        |                      |          |          |        |      |            |          | AAL94822.1  Hypothetical cytosolic protein                                   |                         |    |    |   |   |   |   |
|         |                        |                      |          |          |        | 12   |            | 12.0000  |                                                                              |                         |    |    |   |   |   |   |
| FN0627  | 1.417                  | 15.214               | 4.805e-7 | 4.851e-8 | 284    | 95   | 324.9095   | 123.6536 | AAL94823.1  Glucosamine--fructose-6-phosphate aminotransferase (isomerizing) |                         |    |    |   |   |   |   |
|         |                        |                      |          |          | 213    | 115  | 312.2151   | 115.0000 |                                                                              |                         |    |    |   |   |   |   |
| FN0628  | 1.684                  | 7.195                | 1.338e-4 | 1.266e-4 | 20     | 5    | 22.8809    | 6.5081   | AAL94824.1  Glucosamine--fructose-6-phosphate aminotransferase (isomerizing) |                         |    |    |   |   |   |   |
|         |                        |                      |          |          | 14     | 7    | 20.5212    | 7.0000   |                                                                              |                         |    |    |   |   |   |   |
| FN0629  | 0.757                  | 10.133               | 5.895e-3 | 1.853e-2 | 39     | 25   | 44.6178    | 32.5404  | AAL94825.1  PTS system, IID component                                        |                         |    |    |   |   |   |   |
|         |                        |                      |          |          | 29     | 19   | 42.5082    | 19.0000  |                                                                              |                         |    |    |   |   |   |   |
| FN0630  |                        |                      |          |          | 34     |      | 38.8976    |          | AAL94826.1  PTS system, IIC component                                        |                         |    |    |   |   |   |   |
|         |                        |                      |          |          | 11     |      | 16.1238    |          |                                                                              |                         |    |    |   |   |   |   |
| FN0631  | -0.308                 | 7.911                | 5.295e-2 | 2.379e-1 | 9      | 15   | 10.2964    | 19.5242  | AAL94827.1  PTS system, IIB component                                        |                         |    |    |   |   |   |   |
|         |                        |                      |          |          | 12     | 15   | 17.5896    | 15.0000  |                                                                              |                         |    |    |   |   |   |   |
| FN0633  | -0.564                 | 6.408                | 5.091e-2 | 2.275e-1 | 3      | 8    | 3.4321     | 10.4129  | AAL94829.1  Replication protein                                              |                         |    |    |   |   |   |   |
|         |                        |                      |          |          | 8      | 12   | 11.7264    | 12.0000  |                                                                              |                         |    |    |   |   |   |   |
| FN0634  | 1.675                  | 12.072               | 3.101e-5 | 1.7e-5   | 105    | 28   | 120.1250   | 36.4453  | AAL94830.1  GTP-binding protein TypA/BipA                                    |                         |    |    |   |   |   |   |
|         |                        |                      |          |          | 78     | 37   | 114.3323   | 37.0000  |                                                                              |                         |    |    |   |   |   |   |
| FN0637  |                        |                      |          |          | 4      |      | 4.5762     |          | AAL94833.1  Hypothetical exported 24-amino acid repeat protein               |                         |    |    |   |   |   |   |
|         |                        |                      |          |          | 5      |      | 7.3290     |          |                                                                              |                         |    |    |   |   |   |   |
| FN0643  | -0.381                 | 8.335                | 7.704e-2 | 3.611e-1 | 16     | 10   | 18.3048    | 13.0162  | AAL94839.1  hypothetical DNA-binding protein                                 |                         |    |    |   |   |   |   |
|         |                        |                      |          |          | 9      | 28   | 13.1922    | 28.0000  |                                                                              |                         |    |    |   |   |   |   |
| FN0644  | 0.235                  | 10.507               | 1.079e-1 | 5.229e-1 | 48     | 21   | 54.9143    | 27.3339  | AAL94840.1  Uroporphyrin-III C-methyltransferase                             |                         |    |    |   |   |   |   |
|         |                        |                      |          |          | 19     | 43   | 27.8502    | 43.0000  |                                                                              |                         |    |    |   |   |   |   |
| FN0645  | 0.275                  | 5.444                |          |          | 5      |      | 5.7202     |          | AAL94841.1  Porphobilinogen deaminase                                        |                         |    |    |   |   |   |   |
|         |                        |                      |          |          | 6      | 6    | 8.7948     | 6.0000   |                                                                              |                         |    |    |   |   |   |   |
| FN0646  | 2.069                  | 5.239                |          |          | 11     |      | 12.5845    |          | AAL94842.1  Glutamyl-tRNA reductase                                          |                         |    |    |   |   |   |   |
|         |                        |                      |          |          |        | 3    |            | 3.0000   |                                                                              |                         |    |    |   |   |   |   |
| FN0647  |                        |                      |          |          | 5      |      | 5.7202     |          | AAL94843.1  transcriptional regulator                                        |                         |    |    |   |   |   |   |
|         |                        |                      |          |          |        |      |            |          |                                                                              |                         |    |    |   |   |   |   |

Show detected proteins only  
 Show all proteins  
 Filter by category:

Proteins found: 1344

Enter (or paste) list of ORFs

Find ORFs

Test Cutoff

q-Value

p-Value

.005

| Signif | Direction | Applies To   |
|--------|-----------|--------------|
| yes    | +         | ratios, bars |
| no     | n/a       | bars         |
| yes    | -         | ratios, bars |
| yes    | +         | p-, q-Values |
| yes    | -         | p-, q-Values |

Dot Plots  Dot Plots

Fn Summary Table FnPg vs Fn FnSg vs Fn FnPgSg vs Fn FnPgSg vs FnPg FnSg vs FnPg FnPgSg vs FnSg Fn Coverage

| Protein       | FnPgSg vs FnSg         |                      |          |          | Raw    |      | Normalized |           | Description                                                         | Log <sub>2</sub> Ratios |    |    |   |   |   |   |
|---------------|------------------------|----------------------|----------|----------|--------|------|------------|-----------|---------------------------------------------------------------------|-------------------------|----|----|---|---|---|---|
|               | Log <sub>2</sub> Ratio | Log <sub>2</sub> Sum | q-Value  | p-Value  | FnPgSg | FnSg | FnPgSg     | FnSg      |                                                                     | -6                      | -4 | -2 | 0 | 2 | 4 | 6 |
| <b>FN0651</b> |                        |                      |          |          |        | 6    |            | 6.0000    | AAL94847.1  Ribosomal large subunit pseudouridine synthase D        |                         |    |    |   |   |   |   |
| <b>FN0652</b> | -1.847                 | 24.301               | 4.383e-4 | 6.266e-4 | 2302   | 5960 | 2633.5970  | 7757.6347 | AAL94848.1  Glyceraldehyde 3-phosphate dehydrogenase                |                         |    |    |   |   |   |   |
| <b>FN0653</b> | -2.143                 | 11.378               | 1.208e-3 | 2.477e-3 | 16     | 69   | 18.3048    | 89.8115   | AAL94849.1  unknown                                                 |                         |    |    |   |   |   |   |
| <b>FN0654</b> | -1.529                 | 19.324               | 2.485e-4 | 2.983e-4 | 366    | 1156 | 418.7213   | 1504.6687 | AAL94850.1  Phosphoglycerate kinase                                 |                         |    |    |   |   |   |   |
| <b>FN0655</b> | 1.763                  | 9.915                | 4.916e-3 | 1.47e-2  | 36     | 19   | 41.1857    | 24.7307   | AAL94851.1  unknown                                                 |                         |    |    |   |   |   |   |
| <b>FN0656</b> |                        |                      |          |          | 33     |      | 37.7536    |           | AAL94852.1  Hypothetical protein                                    |                         |    |    |   |   |   |   |
| <b>FN0657</b> |                        |                      |          |          | 26     |      | 38.1108    |           | AAL94853.1  Acetyltransferase                                       |                         |    |    |   |   |   |   |
| <b>FN0658</b> | 1.668                  | 13.308               | 4.392e-6 | 8.367e-7 | 155    | 43   | 177.3273   | 55.9695   | AAL94854.1  ABC transporter substrate-binding protein               |                         |    |    |   |   |   |   |
| <b>FN0660</b> | 0.080                  | 6.117                | 1.598e-1 | 8.224e-1 | 6      | 4    | 6.8643     | 5.2065    | AAL94856.1  ABC transporter ATP-binding protein                     |                         |    |    |   |   |   |   |
| <b>FN0662</b> | -0.318                 | 11.685               | 2.059e-3 | 4.791e-3 | 45     | 47   | 51.4821    | 61.1760   | AAL94858.1  Formiminoglutamase                                      |                         |    |    |   |   |   |   |
| <b>FN0664</b> | -0.274                 | 14.075               | 1.307e-1 | 6.503e-1 | 123    | 46   | 140.7178   | 59.8744   | AAL94860.1  2-nitropropane dioxygenase                              |                         |    |    |   |   |   |   |
| <b>FN0666</b> |                        |                      |          |          |        | 4    |            | 5.2065    | AAL94862.1  Hypothetical protein                                    |                         |    |    |   |   |   |   |
| <b>FN0668</b> | -0.727                 | 7.955                | 1.69e-2  | 6.487e-2 | 15     | 15   | 17.1607    | 19.5242   | AAL94864.1  High-affinity zinc uptake system protein znuA precursor |                         |    |    |   |   |   |   |
| <b>FN0672</b> | -0.328                 | 7.772                |          |          |        | 17   |            | 22.1275   | AAL94868.1  ATPase                                                  |                         |    |    |   |   |   |   |
| <b>FN0675</b> | -1.599                 | 22.077               | 7.717e-3 | 2.578e-2 | 974    | 2016 | 1114.3021  | 2624.0590 | AAL94871.1  60 kDa chaperonin GROEL                                 |                         |    |    |   |   |   |   |
| <b>FN0676</b> | 1.171                  | 11.985               | 2.937e-4 | 3.755e-4 | 76     | 36   | 86.9476    | 46.8582   | AAL94872.1  10 kDa chaperonin GROES                                 |                         |    |    |   |   |   |   |

Show detected proteins only  
 Show all proteins  
 Filter by category:

Proteins found: 1344

Enter (or paste) list of ORFs

Find ORFs

Test Cutoff

q-Value

p-Value

.005

| Signif | Direction | Applies To   |
|--------|-----------|--------------|
| yes    | +         | ratios, bars |
| no     | n/a       | bars         |
| yes    | -         | ratios, bars |
| yes    | +         | p-, q-Values |
| yes    | -         | p-, q-Values |

Dot Plots Dot Plots

Fn Summary Table FnPg vs Fn FnSg vs Fn FnPgSg vs Fn FnPgSg vs FnPg FnSg vs FnPg FnPgSg vs FnSg Fn Coverage

| Protein | FnPgSg vs FnSg         |                      |          |          | Raw    |      | Normalized |          | Description                                            | Log <sub>2</sub> Ratios |    |    |   |   |   |   |
|---------|------------------------|----------------------|----------|----------|--------|------|------------|----------|--------------------------------------------------------|-------------------------|----|----|---|---|---|---|
|         | Log <sub>2</sub> Ratio | Log <sub>2</sub> Sum | q-Value  | p-Value  | FnPgSg | FnSg | FnPgSg     | FnSg     |                                                        | -6                      | -4 | -2 | 0 | 2 | 4 | 6 |
| FN0677  | -1.430                 | 10.796               | 9.163e-5 | 7.743e-5 | 18     | 51   | 20.5929    | 66.3824  | AAL94873.1  Hypothetical protein                       |                         |    |    |   |   |   |   |
|         |                        |                      |          |          | 21     | 72   | 30.7818    | 72.0000  |                                                        |                         |    |    |   |   |   |   |
| FN0678  | -0.043                 | 11.635               | 1.3e-1   | 6.463e-1 | 51     | 48   | 58.3464    | 62.4776  | AAL94874.1  Ser/Thr protein kinase                     |                         |    |    |   |   |   |   |
|         |                        |                      |          |          | 36     | 52   | 52.7687    | 52.0000  |                                                        |                         |    |    |   |   |   |   |
| FN0679  | -1.033                 | 5.307                |          |          |        |      |            |          | AAL94875.1  GTPase                                     |                         |    |    |   |   |   |   |
|         |                        |                      |          |          | 3      | 9    | 4.3974     | 9.0000   |                                                        |                         |    |    |   |   |   |   |
| FN0680  | -1.031                 | 6.370                |          |          | 6      |      | 6.8643     |          | AAL94876.1  Ribulose-phosphate 3-epimerase             |                         |    |    |   |   |   |   |
|         |                        |                      |          |          | 4      | 13   | 5.8632     | 13.0000  |                                                        |                         |    |    |   |   |   |   |
| FN0681  | -0.585                 | 15.877               | 2.382e-3 | 5.769e-3 | 176    | 212  | 201.3523   | 275.9427 | AAL94877.1  Transcriptional regulator, MarR family     |                         |    |    |   |   |   |   |
|         |                        |                      |          |          | 136    | 325  | 199.3486   | 325.0000 |                                                        |                         |    |    |   |   |   |   |
| FN0682  | -0.750                 | 9.358                | 8.597e-3 | 2.928e-2 | 23     | 28   | 26.3131    | 36.4453  | AAL94878.1  Fibronectin-binding protein-like protein A |                         |    |    |   |   |   |   |
|         |                        |                      |          |          | 9      | 30   | 13.1922    | 30.0000  |                                                        |                         |    |    |   |   |   |   |
| FN0684  | -2.070                 | 5.628                |          |          | 3      | 16   | 3.4321     | 20.8259  | AAL94880.1  Prismane protein                           |                         |    |    |   |   |   |   |
|         |                        |                      |          |          |        | 8    |            | 8.0000   |                                                        |                         |    |    |   |   |   |   |
| FN0685  | -3.046                 | 9.677                | 4.206e-3 | 1.193e-2 | 11     | 81   | 12.5845    | 105.4309 | AAL94881.1  Sodium/pantothenate symporter              |                         |    |    |   |   |   |   |
|         |                        |                      |          |          | 5      | 59   | 7.3290     | 59.0000  |                                                        |                         |    |    |   |   |   |   |
| FN0688  | -2.916                 | 9.474                | 1.716e-5 | 7.086e-6 | 8      | 58   | 9.1524     | 75.4938  | AAL94884.1  Hypothetical protein                       |                         |    |    |   |   |   |   |
|         |                        |                      |          |          | 7      | 71   | 10.2606    | 71.0000  |                                                        |                         |    |    |   |   |   |   |
| FN0689  | -0.571                 | 14.637               | 3.858e-2 | 1.661e-1 | 120    | 196  | 137.2857   | 255.1168 | AAL94885.1  Hypothetical protein                       |                         |    |    |   |   |   |   |
|         |                        |                      |          |          | 85     | 134  | 124.5929   | 134.0000 |                                                        |                         |    |    |   |   |   |   |
| FN0692  | -0.587                 | 4.860                |          |          |        | 4    |            | 5.2065   | AAL94888.1  Nitrogen regulation protein NIFR3          |                         |    |    |   |   |   |   |
|         |                        |                      |          |          | 3      | 8    | 4.3974     | 8.0000   |                                                        |                         |    |    |   |   |   |   |
| FN0693  |                        |                      |          |          | 11     |      | 12.5845    |          | AAL94889.1  DNA mismatch repair protein mutS           |                         |    |    |   |   |   |   |
|         |                        |                      |          |          |        |      |            |          |                                                        |                         |    |    |   |   |   |   |
| FN0694  | -0.341                 | 11.743               | 4.346e-3 | 1.248e-2 | 41     | 49   | 46.9059    | 63.7792  | AAL94890.1  S-layer protein                            |                         |    |    |   |   |   |   |
|         |                        |                      |          |          | 39     | 68   | 57.1661    | 68.0000  |                                                        |                         |    |    |   |   |   |   |
| FN0695  | -0.826                 | 10.337               | 9.512e-4 | 1.814e-3 | 28     | 39   | 32.0333    | 50.7630  | AAL94891.1  ABC transporter ATP-binding protein        |                         |    |    |   |   |   |   |
|         |                        |                      |          |          | 15     | 45   | 21.9870    | 45.0000  |                                                        |                         |    |    |   |   |   |   |
| FN0697  | 0.376                  | 15.163               | 2.452e-3 | 5.992e-3 | 202    | 117  | 231.0976   | 152.2891 | AAL94893.1  Alanyl-tRNA synthetase                     |                         |    |    |   |   |   |   |
|         |                        |                      |          |          | 140    | 184  | 205.2118   | 184.0000 |                                                        |                         |    |    |   |   |   |   |
| FN0699  | 1.952                  | 11.196               | 1.933e-4 | 2.085e-4 | 82     | 24   | 93.8119    | 31.2388  | AAL94895.1  Protein translocase subunit secD           |                         |    |    |   |   |   |   |
|         |                        |                      |          |          | 66     | 18   | 96.7427    | 18.0000  |                                                        |                         |    |    |   |   |   |   |

Show detected proteins only  
 Show all proteins  
 Filter by category:

Proteins found: 1344

Enter (or paste) list of ORFs

Find ORFs

Test Cutoff

q-Value p-Value

.005

| Signif | Direction | Applies To   |
|--------|-----------|--------------|
| yes    | +         | ratios, bars |
| no     | n/a       | bars         |
| yes    | -         | ratios, bars |
| yes    | +         | p-, q-Values |
| yes    | -         | p-, q-Values |

Dot Plots Dot Plots

Fn Summary Table FnPg vs Fn FnSg vs Fn FnPgSg vs Fn FnPgSg vs FnPg FnSg vs FnPg FnPgSg vs FnSg Fn Coverage

| Protein | FnPgSg vs FnSg         |                      |          |          | Raw    |      | Normalized |          | Description                                                  | Log <sub>2</sub> Ratios |    |    |   |   |   |   |
|---------|------------------------|----------------------|----------|----------|--------|------|------------|----------|--------------------------------------------------------------|-------------------------|----|----|---|---|---|---|
|         | Log <sub>2</sub> Ratio | Log <sub>2</sub> Sum | q-Value  | p-Value  | FnPgSg | FnSg | FnPgSg     | FnSg     |                                                              | -6                      | -4 | -2 | 0 | 2 | 4 | 6 |
| FN0700  | 2.084                  | 7.994                | 3.144e-6 | 5.274e-7 | 28     | 5    | 32.0333    | 6.5081   | AAL94896.1  Protein translocase subunit secF                 |                         |    |    |   |   |   |   |
|         |                        |                      |          |          | 23     | 9    | 33.7134    | 9.0000   |                                                              |                         |    |    |   |   |   |   |
| FN0701  | 0.647                  | 14.550               | 8.241e-5 | 6.706e-5 | 176    | 88   | 201.3523   | 114.5423 | AAL94897.1  Methyltransferase                                |                         |    |    |   |   |   |   |
|         |                        |                      |          |          | 127    | 133  | 186.1564   | 133.0000 |                                                              |                         |    |    |   |   |   |   |
| FN0705  | -0.375                 | 13.007               | 1.004e-3 | 1.947e-3 | 65     | 75   | 74.3631    | 97.6212  | AAL94901.1  DNA polymerase I                                 |                         |    |    |   |   |   |   |
|         |                        |                      |          |          | 58     | 109  | 85.0163    | 109.0000 |                                                              |                         |    |    |   |   |   |   |
| FN0706  | 0.779                  | 4.779                |          |          | 6      |      | 6.8643     |          | AAL94902.1  Hypothetical cytosolic protein                   |                         |    |    |   |   |   |   |
|         |                        |                      |          |          |        | 4    |            | 4.0000   |                                                              |                         |    |    |   |   |   |   |
| FN0707  | 0.185                  | 6.275                | 1.028e-1 | 4.958e-1 | 10     | 5    | 11.4405    | 6.5081   | AAL94903.1  Riboflavin kinase                                |                         |    |    |   |   |   |   |
|         |                        |                      |          |          | 5      | 10   | 7.3290     | 10.0000  |                                                              |                         |    |    |   |   |   |   |
| FN0710  | -0.088                 | 11.295               | 1.796e-2 | 6.956e-2 | 44     | 41   | 50.3381    | 53.3663  | AAL94906.1  Hypothetical protein                             |                         |    |    |   |   |   |   |
|         |                        |                      |          |          | 32     | 50   | 46.9056    | 50.0000  |                                                              |                         |    |    |   |   |   |   |
| FN0711  | -1.353                 | 8.005                | 8.191e-3 | 2.767e-2 | 6      | 14   | 6.8643     | 18.2226  | AAL94907.1  Phosphopantothenate--cysteine ligase             |                         |    |    |   |   |   |   |
|         |                        |                      |          |          | 9      | 33   | 13.1922    | 33.0000  |                                                              |                         |    |    |   |   |   |   |
| FN0714  |                        |                      |          |          |        | 8    |            | 10.4129  | AAL94910.1  NADH oxidase                                     |                         |    |    |   |   |   |   |
|         |                        |                      |          |          |        | 16   |            | 16.0000  |                                                              |                         |    |    |   |   |   |   |
| FN0715  | 0.825                  | 15.246               | 4.6e-3   | 1.348e-2 | 264    | 120  | 302.0285   | 156.1940 | AAL94911.1  Hypothetical protein                             |                         |    |    |   |   |   |   |
|         |                        |                      |          |          | 152    | 140  | 222.8014   | 140.0000 |                                                              |                         |    |    |   |   |   |   |
| FN0716  | -1.066                 | 10.920               | 1.651e-5 | 6.648e-6 | 25     | 51   | 28.6012    | 66.3824  | AAL94912.1  hypothetical protein                             |                         |    |    |   |   |   |   |
|         |                        |                      |          |          | 22     | 61   | 32.2476    | 61.0000  |                                                              |                         |    |    |   |   |   |   |
| FN0717  | 0.194                  | 4.838                |          |          | 5      |      | 5.7202     |          | AAL94913.1  Ribosomal small subunit pseudouridine synthase A |                         |    |    |   |   |   |   |
|         |                        |                      |          |          |        | 5    |            | 5.0000   |                                                              |                         |    |    |   |   |   |   |
| FN0720  | -0.714                 | 12.072               | 4.008e-2 | 1.736e-1 | 46     | 40   | 52.6262    | 52.0647  | AAL94916.1  Protein Translation Elongation Factor P (EF-P)   |                         |    |    |   |   |   |   |
|         |                        |                      |          |          | 34     | 116  | 49.8372    | 116.0000 |                                                              |                         |    |    |   |   |   |   |
| FN0721  | 0.185                  | 10.583               | 4.316e-2 | 1.888e-1 | 32     | 28   | 36.6095    | 36.4453  | AAL94917.1  Hypothetical protein                             |                         |    |    |   |   |   |   |
|         |                        |                      |          |          | 32     | 37   | 46.9056    | 37.0000  |                                                              |                         |    |    |   |   |   |   |
| FN0722  | -1.397                 | 5.786                |          |          | 4      | 7    | 4.5762     | 9.1113   | AAL94918.1  WD-repeat family protein                         |                         |    |    |   |   |   |   |
|         |                        |                      |          |          |        | 15   |            | 15.0000  |                                                              |                         |    |    |   |   |   |   |
| FN0723  |                        |                      |          |          |        |      |            |          | AAL94919.1  Hypothetical protein                             |                         |    |    |   |   |   |   |
|         |                        |                      |          |          |        | 5    |            | 5.0000   |                                                              |                         |    |    |   |   |   |   |
| FN0724  | -0.381                 | 11.687               | 3.506e-2 | 1.488e-1 | 38     | 40   | 43.4738    | 52.0647  | AAL94920.1  Flavodoxin                                       |                         |    |    |   |   |   |   |
|         |                        |                      |          |          | 39     | 79   | 57.1661    | 79.0000  |                                                              |                         |    |    |   |   |   |   |

Show detected proteins only  
 Show all proteins  
 Filter by category:  
 GO: amino acid transport

Proteins found: 1344

Enter (or paste) list of ORFs

| Test    | Cutoff |
|---------|--------|
| q-Value | .005   |
| p-Value |        |

| Signif | Direction | Applies To   |
|--------|-----------|--------------|
| yes    | +         | ratios, bars |
| no     | n/a       | bars         |
| yes    | -         | ratios, bars |
| yes    | +         | p-, q-Values |
| yes    | -         | p-, q-Values |

Fn Summary Table FnPg vs Fn FnSg vs Fn FnPgSg vs Fn FnPgSg vs FnPg FnSg vs FnPg FnPgSg vs FnSg Fn Coverage

| Protein | FnPgSg vs FnSg         |                      |          |          | Raw    |      | Normalized |          | Description                                                    | Log <sub>2</sub> Ratios |    |    |   |   |   |   |
|---------|------------------------|----------------------|----------|----------|--------|------|------------|----------|----------------------------------------------------------------|-------------------------|----|----|---|---|---|---|
|         | Log <sub>2</sub> Ratio | Log <sub>2</sub> Sum | q-Value  | p-Value  | FnPgSg | FnSg | FnPgSg     | FnSg     |                                                                | -6                      | -4 | -2 | 0 | 2 | 4 | 6 |
| FN0725  | -1.565                 | 8.611                | 3.401e-3 | 8.996e-3 | 6      | 20   | 6.8643     | 26.0323  | AAL94921.1  Molybdopterin biosynthesis MoeB protein            |                         |    |    |   |   |   |   |
|         |                        |                      |          |          | 11     | 42   | 16.1238    | 42.0000  |                                                                |                         |    |    |   |   |   |   |
| FN0728  | -0.136                 | 10.938               | 2.482e-3 | 6.088e-3 | 38     | 36   | 43.4738    | 46.8582  | AAL94924.1  Hypothetical protein                               |                         |    |    |   |   |   |   |
|         |                        |                      |          |          | 28     | 46   | 41.0424    | 46.0000  |                                                                |                         |    |    |   |   |   |   |
| FN0729  | 0.747                  | 14.060               | 2.999e-3 | 7.674e-3 | 146    | 92   | 167.0309   | 119.7487 | AAL94925.1  Phosphoglycerate mutase                            |                         |    |    |   |   |   |   |
|         |                        |                      |          |          | 117    | 82   | 171.4984   | 82.0000  |                                                                |                         |    |    |   |   |   |   |
| FN0731  | 0.387                  | 8.681                | 4.482e-2 | 1.97e-1  | 20     | 18   | 22.8809    | 23.4291  | AAL94927.1  Hypothetical protein                               |                         |    |    |   |   |   |   |
|         |                        |                      |          |          | 16     | 12   | 23.4528    | 12.0000  |                                                                |                         |    |    |   |   |   |   |
| FN0733  | 1.763                  | 13.115               | 3.459e-6 | 6.111e-7 | 147    | 34   | 168.1750   | 44.2550  | AAL94929.1  Peptidase T                                        |                         |    |    |   |   |   |   |
|         |                        |                      |          |          | 122    | 58   | 178.8274   | 58.0000  |                                                                |                         |    |    |   |   |   |   |
| FN0734  |                        |                      |          |          |        |      |            | 3.9048   | AAL94930.1  Fe-S oxidoreductase                                |                         |    |    |   |   |   |   |
|         |                        |                      |          |          |        |      |            | 4.0000   |                                                                |                         |    |    |   |   |   |   |
| FN0735  | 1.765                  | 12.009               | 7.314e-4 | 1.272e-3 | 89     | 32   | 101.8202   | 41.6517  | AAL94931.1  Cell surface protein                               |                         |    |    |   |   |   |   |
|         |                        |                      |          |          | 92     | 28   | 134.8535   | 28.0000  |                                                                |                         |    |    |   |   |   |   |
| FN0736  | -1.116                 | 7.366                | 1.799e-3 | 4.056e-3 | 5      | 16   | 5.7202     | 20.8259  | AAL94932.1  Methyltransferase                                  |                         |    |    |   |   |   |   |
|         |                        |                      |          |          | 8      | 17   | 11.7264    | 17.0000  |                                                                |                         |    |    |   |   |   |   |
| FN0737  |                        |                      |          |          |        |      |            | 17.1607  | AAL94933.1  Hypothetical protein                               |                         |    |    |   |   |   |   |
|         |                        |                      |          |          | 15     |      |            | 14.6580  |                                                                |                         |    |    |   |   |   |   |
| FN0738  | -0.757                 | 9.805                | 2.537e-2 | 1.032e-1 | 21     | 39   | 24.0250    | 50.7630  | AAL94934.1  Hypothetical exported 24-amino acid repeat protein |                         |    |    |   |   |   |   |
|         |                        |                      |          |          | 15     | 27   | 21.9870    | 27.0000  |                                                                |                         |    |    |   |   |   |   |
| FN0739  | 1.323                  | 16.007               | 3.31e-5  | 1.872e-5 | 338    | 144  | 386.6880   | 187.4328 | AAL94935.1  Formiminotetrahydrofolate cyclodeaminase           |                         |    |    |   |   |   |   |
|         |                        |                      |          |          | 290    | 137  | 425.0816   | 137.0000 |                                                                |                         |    |    |   |   |   |   |
| FN0740  | -1.050                 | 17.835               | 4.295e-3 | 1.228e-2 | 308    | 625  | 352.3666   | 813.5104 | AAL94936.1  Imidazolonepropionase                              |                         |    |    |   |   |   |   |
|         |                        |                      |          |          | 218    | 578  | 319.5441   | 578.0000 |                                                                |                         |    |    |   |   |   |   |
| FN0741  | 0.326                  | 18.975               | 7.731e-3 | 2.584e-2 | 659    | 551  | 753.9272   | 717.1907 | AAL94937.1  Glutamate formiminotransferase                     |                         |    |    |   |   |   |   |
|         |                        |                      |          |          | 582    | 565  | 853.0948   | 565.0000 |                                                                |                         |    |    |   |   |   |   |
| FN0742  | 0.116                  | 11.614               | 1.398e-1 | 7.029e-1 | 66     | 35   | 75.5071    | 45.5566  | AAL94938.1  unknown                                            |                         |    |    |   |   |   |   |
|         |                        |                      |          |          | 28     | 62   | 41.0424    | 62.0000  |                                                                |                         |    |    |   |   |   |   |
| FN0743  | 1.503                  | 6.119                | 4.719e-5 | 3.226e-5 | 13     | 3    | 14.8726    | 3.9048   | AAL94939.1  ATP-dependent helicase, DinG family                |                         |    |    |   |   |   |   |
|         |                        |                      |          |          | 9      | 6    | 13.1922    | 6.0000   |                                                                |                         |    |    |   |   |   |   |
| FN0745  | -0.661                 | 14.479               | 1.661e-2 | 6.357e-2 | 114    | 179  | 130.4214   | 232.9894 | AAL94941.1  metal dependent phosphohydrolase                   |                         |    |    |   |   |   |   |
|         |                        |                      |          |          | 75     | 147  | 109.9349   | 147.0000 |                                                                |                         |    |    |   |   |   |   |

Show detected proteins only  
 Show all proteins  
 Filter by category:

Proteins found: 1344

Enter (or paste) list of ORFs

Find ORFs

Test Cutoff

q-Value p-Value

.005

| Signif | Direction | Applies To   |
|--------|-----------|--------------|
| yes    | +         | ratios, bars |
| no     | n/a       | bars         |
| yes    | -         | ratios, bars |
| yes    | +         | p-, q-Values |
| yes    | -         | p-, q-Values |

Dot Plots Dot Plots

Fn Summary Table FnPg vs Fn FnSg vs Fn FnPgSg vs Fn FnPgSg vs FnPg FnSg vs FnPg FnPgSg vs FnSg Fn Coverage

| Protein | FnPgSg vs FnSg         |                      |          |          | Raw    |      | Normalized |          | Description                                                                | Log <sub>2</sub> Ratios |    |    |   |   |   |   |
|---------|------------------------|----------------------|----------|----------|--------|------|------------|----------|----------------------------------------------------------------------------|-------------------------|----|----|---|---|---|---|
|         | Log <sub>2</sub> Ratio | Log <sub>2</sub> Sum | q-Value  | p-Value  | FnPgSg | FnSg | FnPgSg     | FnSg     |                                                                            | -6                      | -4 | -2 | 0 | 2 | 4 | 6 |
| FN0746  |                        |                      |          |          |        | 5    |            | 6.5081   | AAL94942.1  Hypothetical Metal-Binding Protein                             |                         |    |    |   |   |   |   |
|         |                        |                      |          |          |        | 21   |            | 21.0000  |                                                                            |                         |    |    |   |   |   |   |
| FN0749  |                        |                      |          |          |        |      |            |          | AAL94945.1  Hypothetical protein                                           |                         |    |    |   |   |   |   |
|         |                        |                      |          |          | 4      |      |            | 5.8632   |                                                                            |                         |    |    |   |   |   |   |
| FN0750  | -2.551                 | 9.274                | 5.349e-5 | 3.806e-5 | 9      | 48   | 10.2964    | 62.4776  | AAL94946.1  Hypothetical protein                                           |                         |    |    |   |   |   |   |
|         |                        |                      |          |          | 7      | 58   | 10.2606    | 58.0000  |                                                                            |                         |    |    |   |   |   |   |
| FN0751  | -0.934                 | 8.976                | 4.039e-3 | 1.129e-2 | 13     | 20   | 14.8726    | 26.0323  | AAL94947.1  L-asparaginase I                                               |                         |    |    |   |   |   |   |
|         |                        |                      |          |          | 12     | 36   | 17.5896    | 36.0000  |                                                                            |                         |    |    |   |   |   |   |
| FN0752  | -1.692                 | 7.280                | 3.767e-5 | 2.284e-5 | 7      | 16   | 8.0083     | 20.8259  | AAL94948.1  Proline iminopeptidase                                         |                         |    |    |   |   |   |   |
|         |                        |                      |          |          | 4      | 24   | 5.8632     | 24.0000  |                                                                            |                         |    |    |   |   |   |   |
| FN0753  | 1.122                  | 13.051               | 3.642e-7 | 3.4e-8   | 121    | 46   | 138.4297   | 59.8744  | AAL94949.1  Glutamyl-tRNA(Gln) amidotransferase subunit B                  |                         |    |    |   |   |   |   |
|         |                        |                      |          |          | 91     | 65   | 133.3877   | 65.0000  |                                                                            |                         |    |    |   |   |   |   |
| FN0754  | 0.386                  | 13.660               | 2.115e-2 | 8.418e-2 | 130    | 63   | 148.7262   | 82.0018  | AAL94950.1  Glutamyl-tRNA(Gln) amidotransferase subunit A                  |                         |    |    |   |   |   |   |
|         |                        |                      |          |          | 76     | 117  | 111.4007   | 117.0000 |                                                                            |                         |    |    |   |   |   |   |
| FN0755  | 0.313                  | 10.364               | 1.69e-2  | 6.487e-2 | 31     | 27   | 35.4655    | 35.1436  | AAL94951.1  Glutamyl-tRNA(Gln) amidotransferase subunit C                  |                         |    |    |   |   |   |   |
|         |                        |                      |          |          | 31     | 30   | 45.4398    | 30.0000  |                                                                            |                         |    |    |   |   |   |   |
| FN0758  | -0.828                 | 14.761               | 7.804e-3 | 2.615e-2 | 111    | 202  | 126.9893   | 262.9265 | AAL94954.1  Rod shape-determining protein mreB                             |                         |    |    |   |   |   |   |
|         |                        |                      |          |          | 84     | 181  | 123.1271   | 181.0000 |                                                                            |                         |    |    |   |   |   |   |
| FN0761  | -0.412                 | 8.116                | 3.712e-2 | 1.588e-1 | 15     | 18   | 17.1607    | 23.4291  | AAL94957.1  Bvg accessory factor                                           |                         |    |    |   |   |   |   |
|         |                        |                      |          |          | 8      | 15   | 11.7264    | 15.0000  |                                                                            |                         |    |    |   |   |   |   |
| FN0765  | 0.609                  | 3.779                |          |          | 4      |      | 4.5762     |          | AAL94961.1  tRNA (5-methylaminomethyl -2-thiouridylate) -methyltransferase |                         |    |    |   |   |   |   |
|         |                        |                      |          |          |        | 3    |            | 3.0000   |                                                                            |                         |    |    |   |   |   |   |
| FN0766  |                        |                      |          |          |        |      |            |          | AAL94962.1  Large-conductance mechanosensitive channel                     |                         |    |    |   |   |   |   |
|         |                        |                      |          |          | 20     |      | 29.3160    |          |                                                                            |                         |    |    |   |   |   |   |
| FN0768  |                        |                      |          |          | 4      |      | 4.5762     |          | AAL94964.1  Hemin receptor                                                 |                         |    |    |   |   |   |   |
|         |                        |                      |          |          |        |      |            |          |                                                                            |                         |    |    |   |   |   |   |
| FN0771  |                        |                      |          |          |        | 3    |            | 3.9048   | AAL94967.1  Oxygen-independent coproporphyrinogen III oxidase              |                         |    |    |   |   |   |   |
|         |                        |                      |          |          |        | 7    |            | 7.0000   |                                                                            |                         |    |    |   |   |   |   |
| FN0774  | 2.651                  | 11.725               | 1.671e-3 | 3.706e-3 | 105    | 18   | 120.1250   | 23.4291  | AAL94970.1  Hypothetical cytosolic protein                                 |                         |    |    |   |   |   |   |
|         |                        |                      |          |          | 117    | 23   | 171.4984   | 23.0000  |                                                                            |                         |    |    |   |   |   |   |
| FN0775  | -0.208                 | 16.097               | 4.753e-3 | 1.406e-2 | 218    | 229  | 249.4023   | 298.0702 | AAL94971.1  Aspartyl aminopeptidase                                        |                         |    |    |   |   |   |   |
|         |                        |                      |          |          | 166    | 271  | 243.3226   | 271.0000 |                                                                            |                         |    |    |   |   |   |   |

Show detected proteins only  
 Show all proteins  
 Filter by category:

Proteins found: 1344

Enter (or paste) list of ORFs

Find ORFs

Test Cutoff

q-Value p-Value

.005

| Signif | Direction | Applies To   |
|--------|-----------|--------------|
| yes    | +         | ratios, bars |
| no     | n/a       | bars         |
| yes    | -         | ratios, bars |
| yes    | +         | p-, q-Values |
| yes    | -         | p-, q-Values |

Dot Plots Dot Plots

Fn Summary Table FnPg vs Fn FnSg vs Fn FnPgSg vs Fn FnPgSg vs FnPg FnSg vs FnPg FnPgSg vs FnSg Fn Coverage

| Protein | FnPgSg vs FnSg         |                      |          |          | Raw    |      | Normalized |           | Description                                              | Log <sub>2</sub> Ratios |    |    |   |   |   |   |
|---------|------------------------|----------------------|----------|----------|--------|------|------------|-----------|----------------------------------------------------------|-------------------------|----|----|---|---|---|---|
|         | Log <sub>2</sub> Ratio | Log <sub>2</sub> Sum | q-Value  | p-Value  | FnPgSg | FnSg | FnPgSg     | FnSg      |                                                          | -6                      | -4 | -2 | 0 | 2 | 4 | 6 |
| FN0776  | -0.809                 | 12.740               | 1.938e-5 | 8.774e-6 | 58     | 86   | 66.3547    | 111.9390  | AAL94972.1  Aspartate-ammonia ligase                     |                         |    |    |   |   |   |   |
|         |                        |                      |          |          | 40     | 107  | 58.6319    | 107.0000  |                                                          |                         |    |    |   |   |   |   |
| FN0777  | 0.322                  | 12.957               | 6.432e-3 | 2.06e-2  | 91     | 68   | 104.1083   | 88.5099   | AAL94973.1  GTP-binding protein lepA                     |                         |    |    |   |   |   |   |
|         |                        |                      |          |          | 65     | 71   | 95.2769    | 71.0000   |                                                          |                         |    |    |   |   |   |   |
| FN0778  | -0.645                 | 8.667                |          |          |        | 18   |            | 23.4291   | AAL94974.1  Methyltransferase                            |                         |    |    |   |   |   |   |
|         |                        |                      |          |          | 11     | 27   | 16.1238    | 27.0000   |                                                          |                         |    |    |   |   |   |   |
| FN0779  |                        |                      |          |          |        | 6    |            | 7.8097    | AAL94975.1  Putative GTPases (G3E family)                |                         |    |    |   |   |   |   |
|         |                        |                      |          |          |        | 11   |            | 11.0000   |                                                          |                         |    |    |   |   |   |   |
| FN0783  | 1.127                  | 23.890               | 3.135e-3 | 8.112e-3 | 5918   | 1871 | 6770.4723  | 2435.3246 | AAL94979.1  acyl-CoA dehydrogenase                       |                         |    |    |   |   |   |   |
|         |                        |                      |          |          | 3331   | 2900 | 4882.5752  | 2900.0000 |                                                          |                         |    |    |   |   |   |   |
| FN0784  | 0.243                  | 22.490               | 3.765e-2 | 1.615e-1 | 1997   | 1910 | 2284.6626  | 2486.0876 | AAL94980.1  Electron transfer flavoprotein beta-subunit  |                         |    |    |   |   |   |   |
|         |                        |                      |          |          | 2044   | 1976 | 2996.0924  | 1976.0000 |                                                          |                         |    |    |   |   |   |   |
| FN0785  | -0.281                 | 21.584               | 2.38e-2  | 9.609e-2 | 1458   | 1307 | 1668.0211  | 1701.2128 | AAL94981.1  Electron transfer flavoprotein alpha-subunit |                         |    |    |   |   |   |   |
|         |                        |                      |          |          | 1057   | 2208 | 1549.3491  | 2208.0000 |                                                          |                         |    |    |   |   |   |   |
| FN0788  | -0.468                 | 9.547                | 1.429e-2 | 5.336e-2 | 24     | 21   | 27.4571    | 27.3339   | AAL94984.1  unknown                                      |                         |    |    |   |   |   |   |
|         |                        |                      |          |          | 13     | 37   | 19.0554    | 37.0000   |                                                          |                         |    |    |   |   |   |   |
| FN0790  | -1.111                 | 6.143                |          |          | 5      | 9    | 5.7202     | 11.7145   | AAL94986.1  Xylose repressor                             |                         |    |    |   |   |   |   |
|         |                        |                      |          |          |        | 13   |            | 13.0000   |                                                          |                         |    |    |   |   |   |   |
| FN0791  | -0.157                 | 18.209               | 6.807e-2 | 3.146e-1 | 459    | 513  | 525.1177   | 667.7293  | AAL94987.1  Histidine ammonia-lyase                      |                         |    |    |   |   |   |   |
|         |                        |                      |          |          | 353    | 495  | 517.4269   | 495.0000  |                                                          |                         |    |    |   |   |   |   |
| FN0792  | -0.579                 | 20.481               | 3.913e-5 | 2.429e-5 | 823    | 1095 | 941.5510   | 1425.2701 | AAL94988.1  Urocanate hydratase                          |                         |    |    |   |   |   |   |
|         |                        |                      |          |          | 708    | 1532 | 1037.7854  | 1532.0000 |                                                          |                         |    |    |   |   |   |   |
| FN0793  |                        |                      |          |          |        |      |            |           | AAL94989.1  Sodium/glutamate symport carrier protein     |                         |    |    |   |   |   |   |
|         |                        |                      |          |          | 22     |      | 32.2476    |           |                                                          |                         |    |    |   |   |   |   |
| FN0794  | -1.545                 | 7.548                |          |          | 7      | 19   | 8.0083     | 24.7307   | AAL94990.1  Hypothetical protein                         |                         |    |    |   |   |   |   |
|         |                        |                      |          |          |        | 22   |            | 22.0000   |                                                          |                         |    |    |   |   |   |   |
| FN0796  | -0.335                 | 14.652               | 5.547e-4 | 8.644e-4 | 128    | 144  | 146.4381   | 187.4328  | AAL94992.1  Pyruvate,phosphate dikinase                  |                         |    |    |   |   |   |   |
|         |                        |                      |          |          | 95     | 173  | 139.2509   | 173.0000  |                                                          |                         |    |    |   |   |   |   |
| FN0798  | -1.012                 | 9.262                | 4.355e-2 | 1.907e-1 | 10     | 41   | 11.4405    | 53.3663   | AAL94994.1  Fructose-1,6-bisphosphatase                  |                         |    |    |   |   |   |   |
|         |                        |                      |          |          | 16     | 17   | 23.4528    | 17.0000   |                                                          |                         |    |    |   |   |   |   |
| FN0799  | -0.614                 | 8.403                |          |          | 13     | 15   | 14.8726    | 19.5242   | AAL94995.1  Isoamylase                                   |                         |    |    |   |   |   |   |
|         |                        |                      |          |          |        | 26   |            | 26.0000   |                                                          |                         |    |    |   |   |   |   |

Show detected proteins only  
 Show all proteins  
 Filter by category:

Proteins found: 1344

Test Cutoff

| Signif | Direction | Applies To   |
|--------|-----------|--------------|
| yes    | +         | ratios, bars |
| no     | n/a       | bars         |
| yes    | -         | ratios, bars |
| yes    | +         | p-, q-Values |
| yes    | -         |              |

Fn Summary Table FnPg vs Fn FnSg vs Fn FnPgSg vs Fn FnPgSg vs FnPg FnSg vs FnPg FnPgSg vs FnSg Fn Coverage

| Protein | FnPgSg vs FnSg         |                      |          |          | Raw    |      | Normalized |          | Description                                               | Log <sub>2</sub> Ratios |    |    |   |   |   |   |
|---------|------------------------|----------------------|----------|----------|--------|------|------------|----------|-----------------------------------------------------------|-------------------------|----|----|---|---|---|---|
|         | Log <sub>2</sub> Ratio | Log <sub>2</sub> Sum | q-Value  | p-Value  | FnPgSg | FnSg | FnPgSg     | FnSg     |                                                           | -6                      | -4 | -2 | 0 | 2 | 4 | 6 |
| FN0800  | 1.264                  | 12.332               | 1.287e-3 | 2.673e-3 | 110    | 32   | 125.8452   | 41.6517  | AAL94996.1  Amino acid-binding protein                    |                         |    |    |   |   |   |   |
|         |                        |                      |          |          | 66     | 51   | 96.7427    | 51.0000  |                                                           |                         |    |    |   |   |   |   |
| FN0801  |                        |                      |          |          |        | 18   |            | 23.4291  | AAL94997.1  Amino acid transport ATP-binding protein      |                         |    |    |   |   |   |   |
|         |                        |                      |          |          |        | 22   |            | 22.0000  |                                                           |                         |    |    |   |   |   |   |
| FN0803  | 0.540                  | 11.094               | 4.987e-3 | 1.498e-2 | 55     | 25   | 62.9226    | 32.5404  | AAL94999.1  Cytochrome C-TYPE biogenesis protein ccdA     |                         |    |    |   |   |   |   |
|         |                        |                      |          |          | 34     | 45   | 49.8372    | 45.0000  |                                                           |                         |    |    |   |   |   |   |
| FN0805  | -1.606                 | 5.937                | 1.328e-4 | 1.252e-4 | 4      | 11   | 4.5762     | 14.3178  | AAL95001.1  Hypothetical protein                          |                         |    |    |   |   |   |   |
|         |                        |                      |          |          | 3      | 13   | 4.3974     | 13.0000  |                                                           |                         |    |    |   |   |   |   |
| FN0806  | 0.130                  | 12.620               | 6.766e-2 | 3.125e-1 | 81     | 62   | 92.6678    | 80.7002  | AAL95002.1  SpoIID homolog                                |                         |    |    |   |   |   |   |
|         |                        |                      |          |          | 50     | 71   | 73.2899    | 71.0000  |                                                           |                         |    |    |   |   |   |   |
| FN0807  | 1.138                  | 8.846                | 1.433e-4 | 1.392e-4 | 30     | 13   | 34.3214    | 16.9210  | AAL95003.1  3-deoxy-manno-octulosonate cytidyltransferase |                         |    |    |   |   |   |   |
|         |                        |                      |          |          | 20     | 12   | 29.3160    | 12.0000  |                                                           |                         |    |    |   |   |   |   |
| FN0808  | -0.701                 | 12.023               | 5.939e-4 | 9.545e-4 | 50     | 68   | 57.2024    | 88.5099  | AAL95004.1  Phosphoglycerate mutase                       |                         |    |    |   |   |   |   |
|         |                        |                      |          |          | 30     | 76   | 43.9740    | 76.0000  |                                                           |                         |    |    |   |   |   |   |
| FN0809  | -0.346                 | 7.654                |          |          | 11     |      | 12.5845    |          | AAL95005.1  23S rRNA methyltransferase                    |                         |    |    |   |   |   |   |
|         |                        |                      |          |          |        | 16   |            | 16.0000  |                                                           |                         |    |    |   |   |   |   |
| FN0810  | -1.671                 | 10.229               | 4.747e-2 | 2.101e-1 | 16     | 12   | 18.3048    | 15.6194  | AAL95006.1  Low-specificity threonine aldolase            |                         |    |    |   |   |   |   |
|         |                        |                      |          |          | 14     | 108  | 20.5212    | 108.0000 |                                                           |                         |    |    |   |   |   |   |
| FN0811  |                        |                      |          |          |        | 4    |            | 5.2065   | AAL95007.1  Hypothetical protein                          |                         |    |    |   |   |   |   |
|         |                        |                      |          |          |        | 5    |            | 5.0000   |                                                           |                         |    |    |   |   |   |   |
| FN0813  | -2.588                 | 9.291                | 1.507e-4 | 1.494e-4 | 14     | 49   | 16.0167    | 63.7792  | AAL95009.1  Transcriptional regulator, TetR family        |                         |    |    |   |   |   |   |
|         |                        |                      |          |          | 3      | 59   | 4.3974     | 59.0000  |                                                           |                         |    |    |   |   |   |   |
| FN0814  | 4.207                  | 11.864               | 3.637e-5 | 2.161e-5 | 241    | 8    | 275.7154   | 10.4129  | AAL95010.1  Propionate CoA-transferase                    |                         |    |    |   |   |   |   |
|         |                        |                      |          |          | 170    | 18   | 249.1858   | 18.0000  |                                                           |                         |    |    |   |   |   |   |
| FN0815  |                        |                      |          |          | 61     |      | 69.7869    |          | AAL95011.1  Propionate permease                           |                         |    |    |   |   |   |   |
|         |                        |                      |          |          | 41     |      | 60.0977    |          |                                                           |                         |    |    |   |   |   |   |
| FN0816  |                        |                      |          |          | 70     |      | 80.0833    |          | AAL95012.1  dehydrogenase with MaoC-like domain           |                         |    |    |   |   |   |   |
|         |                        |                      |          |          | 64     |      | 93.8111    |          |                                                           |                         |    |    |   |   |   |   |
| FN0818  | 2.016                  | 18.019               | 2.237e-5 | 1.089e-5 | 852    | 224  | 974.7284   | 291.5621 | AAL95014.1  DNA-binding protein HU                        |                         |    |    |   |   |   |   |
|         |                        |                      |          |          | 749    | 221  | 1097.8832  | 221.0000 |                                                           |                         |    |    |   |   |   |   |
| FN0819  | 0.437                  | 12.038               | 1.701e-2 | 6.535e-2 | 55     | 38   | 62.9226    | 49.4614  | AAL95015.1  Tetratricopeptide repeat family protein       |                         |    |    |   |   |   |   |
|         |                        |                      |          |          | 60     | 62   | 87.9479    | 62.0000  |                                                           |                         |    |    |   |   |   |   |

Show detected proteins only  
 Show all proteins  
 Filter by category:

Proteins found: 1344

Enter (or paste) list of ORFs

Find ORFs

Test Cutoff

q-Value .005

p-Value

| Signif | Direction | Applies To   |
|--------|-----------|--------------|
| yes    | +         | ratios, bars |
| no     | n/a       | bars         |
| yes    | -         | ratios, bars |
| yes    | +         | p-, q-Values |
| yes    | -         |              |

Dot Plots Dot Plots



Fn Summary Table FnPg vs Fn FnSg vs Fn FnPgSg vs Fn FnPgSg vs FnPg FnSg vs FnPg FnPgSg vs FnSg Fn Coverage

| Protein | FnPgSg vs FnSg         |                      |          |          | Raw    |      | Normalized |          | Description                                        | Log <sub>2</sub> Ratios |    |    |   |   |   |   |
|---------|------------------------|----------------------|----------|----------|--------|------|------------|----------|----------------------------------------------------|-------------------------|----|----|---|---|---|---|
|         | Log <sub>2</sub> Ratio | Log <sub>2</sub> Sum | q-Value  | p-Value  | FnPgSg | FnSg | FnPgSg     | FnSg     |                                                    | -6                      | -4 | -2 | 0 | 2 | 4 | 6 |
| FN0820  | 0.017                  | 14.440               | 1.768e-1 | 9.29e-1  | 120    | 91   | 137.2857   | 118.4471 | AAL95016.1  Mercuric reductase                     |                         |    |    |   |   |   |   |
|         |                        |                      |          |          | 111    | 178  | 162.7036   | 178.0000 |                                                    |                         |    |    |   |   |   |   |
| FN0821  | 0.764                  | 10.566               | 4.059e-3 | 1.136e-2 | 40     | 29   | 45.7619    | 37.7469  | AAL95017.1  Hypothetical protein                   |                         |    |    |   |   |   |   |
|         |                        |                      |          |          | 38     | 22   | 55.7003    | 22.0000  |                                                    |                         |    |    |   |   |   |   |
| FN0823  | -2.287                 | 11.221               | 8.633e-6 | 2.239e-6 | 22     | 79   | 25.1690    | 102.8277 | AAL95019.1  GTP-binding protein hflX               |                         |    |    |   |   |   |   |
|         |                        |                      |          |          | 13     | 113  | 19.0554    | 113.0000 |                                                    |                         |    |    |   |   |   |   |
| FN0824  |                        |                      |          |          |        |      |            | 5.2065   | AAL95020.1  hypothetical cytosolic protein         |                         |    |    |   |   |   |   |
|         |                        |                      |          |          |        |      |            |          |                                                    |                         |    |    |   |   |   |   |
| FN0825  | 0.321                  | 10.063               | 2.875e-2 | 1.187e-1 | 37     | 25   | 42.3298    | 32.5404  | AAL95021.1  Hypothetical cytosolic protein         |                         |    |    |   |   |   |   |
|         |                        |                      |          |          | 21     | 26   | 30.7818    | 26.0000  |                                                    |                         |    |    |   |   |   |   |
| FN0826  | 0.942                  | 9.440                | 4.821e-3 | 1.433e-2 | 28     | 20   | 32.0333    | 26.0323  | AAL95022.1  periplasmic component of efflux system |                         |    |    |   |   |   |   |
|         |                        |                      |          |          | 28     | 12   | 41.0424    | 12.0000  |                                                    |                         |    |    |   |   |   |   |
| FN0827  | -0.986                 | 9.627                | 1.874e-3 | 4.262e-3 | 17     | 27   | 19.4488    | 35.1436  | AAL95023.1  ABC transporter ATP-binding protein    |                         |    |    |   |   |   |   |
|         |                        |                      |          |          | 14     | 44   | 20.5212    | 44.0000  |                                                    |                         |    |    |   |   |   |   |
| FN0828  | 0.217                  | 5.341                |          |          | 6      | 6    | 6.8643     | 7.8097   | AAL95024.1  ABC transporter permease protein       |                         |    |    |   |   |   |   |
|         |                        |                      |          |          |        |      |            | 4.0000   |                                                    |                         |    |    |   |   |   |   |
| FN0830  | -2.563                 | 10.218               | 3.223e-4 | 4.247e-4 | 12     | 59   | 13.7286    | 76.7954  | AAL95026.1  Hypothetical protein                   |                         |    |    |   |   |   |   |
|         |                        |                      |          |          | 10     | 91   | 14.6580    | 91.0000  |                                                    |                         |    |    |   |   |   |   |
| FN0832  | 1.714                  | 11.452               | 1.427e-4 | 1.383e-4 | 92     | 18   | 105.2524   | 23.4291  | AAL95028.1  Hypothetical protein                   |                         |    |    |   |   |   |   |
|         |                        |                      |          |          | 59     | 35   | 86.4821    | 35.0000  |                                                    |                         |    |    |   |   |   |   |
| FN0833  | -0.946                 | 8.807                | 1.439e-2 | 5.376e-2 | 10     | 29   | 11.4405    | 37.7469  | AAL95029.1  Hypothetical protein                   |                         |    |    |   |   |   |   |
|         |                        |                      |          |          | 13     | 21   | 19.0554    | 21.0000  |                                                    |                         |    |    |   |   |   |   |
| FN0834  | 0.820                  | 8.155                | 1.883e-3 | 4.288e-3 | 20     | 8    | 22.8809    | 10.4129  | AAL95030.1  Hypothetical Exported Protein          |                         |    |    |   |   |   |   |
|         |                        |                      |          |          | 15     | 15   | 21.9870    | 15.0000  |                                                    |                         |    |    |   |   |   |   |
| FN0836  | 0.453                  | 8.325                | 7.05e-2  | 3.273e-1 | 11     | 12   | 12.5845    | 15.6194  | AAL95032.1  Hypothetical protein                   |                         |    |    |   |   |   |   |
|         |                        |                      |          |          | 20     | 15   | 29.3160    | 15.0000  |                                                    |                         |    |    |   |   |   |   |
| FN0837  |                        |                      |          |          |        |      |            | 8.0000   | AAL95033.1  Integrase/recombinase                  |                         |    |    |   |   |   |   |
|         |                        |                      |          |          |        |      |            |          |                                                    |                         |    |    |   |   |   |   |
| FN0846  | -0.778                 | 12.163               | 1.024e-3 | 2e-3     | 43     | 74   | 49.1940    | 96.3196  | AAL95042.1  Hypothetical Exported Protein          |                         |    |    |   |   |   |   |
|         |                        |                      |          |          | 37     | 81   | 54.2345    | 81.0000  |                                                    |                         |    |    |   |   |   |   |
| FN0847  | -0.708                 | 6.427                | 4.613e-3 | 1.353e-2 | 5      | 9    | 5.7202     | 11.7145  | AAL95043.1  TPR-repeat-containing proteins         |                         |    |    |   |   |   |   |
|         |                        |                      |          |          | 6      | 12   | 8.7948     | 12.0000  |                                                    |                         |    |    |   |   |   |   |

Show detected proteins only  
 Show all proteins  
 Filter by category:

Proteins found: 1344

Enter (or paste) list of ORFs

Find ORFs

Test Cutoff

q-Value p-Value

.005

| Signif | Direction | Applies To   |
|--------|-----------|--------------|
| yes    | +         | ratios, bars |
| no     | n/a       | bars         |
| yes    | -         | ratios, bars |
| yes    | +         | p-, q-Values |
| yes    | -         | p-, q-Values |

Dot Plots Dot Plots

Fn Summary Table FnPg vs Fn FnSg vs Fn FnPgSg vs Fn FnPgSg vs FnPg FnSg vs FnPg FnPgSg vs FnSg Fn Coverage

| Protein | FnPgSg vs FnSg         |                      |          |          | Raw    |      | Normalized |          | Description                                              | Log <sub>2</sub> Ratios |    |    |   |   |   |   |
|---------|------------------------|----------------------|----------|----------|--------|------|------------|----------|----------------------------------------------------------|-------------------------|----|----|---|---|---|---|
|         | Log <sub>2</sub> Ratio | Log <sub>2</sub> Sum | q-Value  | p-Value  | FnPgSg | FnSg | FnPgSg     | FnSg     |                                                          | -6                      | -4 | -2 | 0 | 2 | 4 | 6 |
| FN0849  | -1.352                 | 10.231               | 4.431e-4 | 6.356e-4 | 20     | 39   | 22.8809    | 50.7630  | AAL95045.1  8-amino-7-oxononanoate synthase              |                         |    |    |   |   |   |   |
|         |                        |                      |          |          | 14     | 60   | 20.5212    | 60.0000  |                                                          |                         |    |    |   |   |   |   |
| FN0850  | -2.342                 | 8.803                | 3.762e-5 | 2.279e-5 | 10     | 37   | 11.4405    | 48.1598  | AAL95046.1  Hypothetical cytosolic protein               |                         |    |    |   |   |   |   |
|         |                        |                      |          |          | 5      | 47   | 7.3290     | 47.0000  |                                                          |                         |    |    |   |   |   |   |
| FN0853  | -1.697                 | 11.969               | 6.011e-4 | 9.718e-4 | 32     | 96   | 36.6095    | 124.9552 | AAL95049.1  Glycogen synthase                            |                         |    |    |   |   |   |   |
|         |                        |                      |          |          | 23     | 103  | 33.7134    | 103.0000 |                                                          |                         |    |    |   |   |   |   |
| FN0854  | -1.267                 | 13.371               | 5.758e-5 | 4.202e-5 | 66     | 114  | 75.5071    | 148.3843 | AAL95050.1  Glucose-1-phosphate adenylyltransferase      |                         |    |    |   |   |   |   |
|         |                        |                      |          |          | 39     | 171  | 57.1661    | 171.0000 |                                                          |                         |    |    |   |   |   |   |
| FN0855  | -1.942                 | 14.519               | 3.09e-5  | 1.691e-5 | 70     | 238  | 80.0833    | 309.7847 | AAL95051.1  Glucose-1-phosphate adenylyltransferase      |                         |    |    |   |   |   |   |
|         |                        |                      |          |          | 52     | 291  | 76.2215    | 291.0000 |                                                          |                         |    |    |   |   |   |   |
| FN0856  | -1.598                 | 12.873               | 7.824e-5 | 6.253e-5 | 55     | 124  | 62.9226    | 161.4005 | AAL95052.1  1,4-alpha-glucan branching enzyme            |                         |    |    |   |   |   |   |
|         |                        |                      |          |          | 25     | 140  | 36.6450    | 140.0000 |                                                          |                         |    |    |   |   |   |   |
| FN0857  | -1.089                 | 16.087               | 3.235e-6 | 5.507e-7 | 165    | 304  | 188.7678   | 395.6914 | AAL95053.1  Glycogen phosphorylase                       |                         |    |    |   |   |   |   |
|         |                        |                      |          |          | 118    | 374  | 172.9642   | 374.0000 |                                                          |                         |    |    |   |   |   |   |
| FN0858  | -3.346                 | 8.570                | 6.341e-3 | 2.025e-2 | 3      | 31   | 3.4321     | 40.3501  | AAL95054.1  4-alpha-glucanotransferase                   |                         |    |    |   |   |   |   |
|         |                        |                      |          |          | 6      | 84   | 8.7948     | 84.0000  |                                                          |                         |    |    |   |   |   |   |
| FN0865  | -3.136                 | 12.360               | 3.176e-6 | 5.356e-7 | 12     | 172  | 13.7286    | 223.8780 | AAL95061.1  unknown                                      |                         |    |    |   |   |   |   |
|         |                        |                      |          |          | 24     | 206  | 35.1792    | 206.0000 |                                                          |                         |    |    |   |   |   |   |
| FN0867  | 0.779                  | 12.388               | 2.152e-4 | 2.424e-4 | 78     | 39   | 89.2357    | 50.7630  | AAL95063.1  Long-chain-fatty-acid--CoA ligase            |                         |    |    |   |   |   |   |
|         |                        |                      |          |          | 70     | 61   | 102.6059   | 61.0000  |                                                          |                         |    |    |   |   |   |   |
| FN0868  |                        |                      |          |          |        |      |            |          | AAL95064.1  ATPases of the PP superfamily                |                         |    |    |   |   |   |   |
| FN0869  | -1.266                 | 4.824                |          |          | 3      | 5    | 3.4321     | 6.5081   | AAL95065.1  Hydrolase (HAD superfamily)                  |                         |    |    |   |   |   |   |
|         |                        |                      |          |          |        | 10   |            | 10.0000  |                                                          |                         |    |    |   |   |   |   |
| FN0870  |                        |                      |          |          | 10     |      | 11.4405    |          | AAL95066.1  Rhodanese-related sulfurtransferases         |                         |    |    |   |   |   |   |
|         |                        |                      |          |          | 9      |      | 13.1922    |          |                                                          |                         |    |    |   |   |   |   |
| FN0871  | -0.015                 | 6.743                |          |          | 9      | 6    | 10.2964    | 7.8097   | AAL95067.1  3-dehydroquinase synthase                    |                         |    |    |   |   |   |   |
|         |                        |                      |          |          |        | 13   |            | 13.0000  |                                                          |                         |    |    |   |   |   |   |
| FN0873  | -1.318                 | 10.273               | 3.073e-3 | 7.913e-3 | 21     | 50   | 24.0250    | 65.0808  | AAL95069.1  Protease IV                                  |                         |    |    |   |   |   |   |
|         |                        |                      |          |          | 14     | 46   | 20.5212    | 46.0000  |                                                          |                         |    |    |   |   |   |   |
| FN0874  |                        |                      |          |          |        |      |            |          | AAL95070.1  Phosphohydrolase (MUTT/NUDIX family protein) |                         |    |    |   |   |   |   |

Show detected proteins only  
 Show all proteins  
 Filter by category:

Proteins found: 1344

Test Cutoff

| Signif | Direction | Applies To   |
|--------|-----------|--------------|
| yes    | +         | ratios, bars |
| no     | n/a       | bars         |
| yes    | -         | ratios, bars |
| yes    | +         | p-, q-Values |
| yes    | -         |              |

Fn Summary Table FnPg vs Fn FnSg vs Fn FnPgSg vs Fn FnPgSg vs FnPg FnSg vs FnPg FnPgSg vs FnSg Fn Coverage

| Protein       | FnPgSg vs FnSg         |                      |          |          | Raw    |      | Normalized |         | Description                                                 | Log <sub>2</sub> Ratios |    |    |   |   |   |   |
|---------------|------------------------|----------------------|----------|----------|--------|------|------------|---------|-------------------------------------------------------------|-------------------------|----|----|---|---|---|---|
|               | Log <sub>2</sub> Ratio | Log <sub>2</sub> Sum | q-Value  | p-Value  | FnPgSg | FnSg | FnPgSg     | FnSg    |                                                             | -6                      | -4 | -2 | 0 | 2 | 4 | 6 |
| <b>FN0875</b> | -0.449                 | 5.481                |          |          | 5      | 6    | 5.7202     | 7.8097  | AAL95071.1  23S rRNA methyltransferase                      |                         |    |    |   |   |   |   |
| <b>FN0878</b> | 0.175                  | 9.505                | 2.076e-2 | 8.236e-2 | 27     | 19   | 30.8893    | 24.7307 | AAL95074.1  Transcriptional regulator, GntR family          |                         |    |    |   |   |   |   |
| <b>FN0884</b> |                        |                      |          |          |        | 3    |            | 3.9048  | AAL95079.1  Hemin transport system permease protein hmuU    |                         |    |    |   |   |   |   |
| <b>FN0886</b> |                        |                      |          |          | 3      |      | 3.4321     |         | AAL95082.1  Hemin receptor                                  |                         |    |    |   |   |   |   |
| <b>FN0887</b> | 0.378                  | 10.791               | 1.65e-2  | 6.304e-2 | 48     | 26   | 54.9143    | 33.8420 | AAL95083.1  Oligoendopeptidase F                            |                         |    |    |   |   |   |   |
| <b>FN0888</b> |                        |                      |          |          | 21     |      | 24.0250    |         | AAL95084.1  Uracil permease                                 |                         |    |    |   |   |   |   |
| <b>FN0889</b> |                        |                      |          |          |        | 9    |            | 9.0000  | AAL95085.1  hypothetical protein                            |                         |    |    |   |   |   |   |
| <b>FN0892</b> |                        |                      |          |          |        | 10   |            | 13.0162 | AAL95088.1  Phosphoserine phosphatase                       |                         |    |    |   |   |   |   |
| <b>FN0893</b> | -0.174                 | 7.440                |          |          | 14     |      | 16.0167    |         | AAL95089.1  Hypothetical protein                            |                         |    |    |   |   |   |   |
| <b>FN0896</b> | 0.631                  | 7.565                | 1.248e-2 | 4.56e-2  | 12     | 7    | 13.7286    | 9.1113  | AAL95092.1  Hypothetical protein                            |                         |    |    |   |   |   |   |
| <b>FN0898</b> |                        |                      |          |          |        | 6    |            | 7.8097  | AAL95094.1  Hypothetical protein                            |                         |    |    |   |   |   |   |
| <b>FN0900</b> |                        |                      |          |          |        | 6    |            | 6.0000  |                                                             |                         |    |    |   |   |   |   |
| <b>FN0900</b> |                        |                      |          |          |        | 20   |            | 20.0000 | AAL95096.1  Metal dependent hydrolase                       |                         |    |    |   |   |   |   |
| <b>FN0901</b> |                        |                      |          |          |        | 10   |            | 13.0162 | AAL95097.1  DNA polymerase, bacteriophage-type              |                         |    |    |   |   |   |   |
| <b>FN0901</b> |                        |                      |          |          |        | 16   |            | 16.0000 |                                                             |                         |    |    |   |   |   |   |
| <b>FN0902</b> |                        |                      |          |          | 6      |      | 6.8643     |         | AAL95098.1  5-formyltetrahydrofolate cyclo-ligase           |                         |    |    |   |   |   |   |
| <b>FN0902</b> |                        |                      |          |          | 8      |      | 11.7264    |         |                                                             |                         |    |    |   |   |   |   |
| <b>FN0903</b> | -0.524                 | 8.788                | 7.871e-4 | 1.408e-3 | 14     | 18   | 16.0167    | 23.4291 | AAL95099.1  Polysialic acid capsule expression protein kpsF |                         |    |    |   |   |   |   |
| <b>FN0903</b> |                        |                      |          |          | 13     | 27   | 19.0554    | 27.0000 |                                                             |                         |    |    |   |   |   |   |
| <b>FN0905</b> |                        |                      |          |          | 11     |      | 12.5845    |         | AAL95101.1  Hypothetical protein                            |                         |    |    |   |   |   |   |
| <b>FN0905</b> |                        |                      |          |          | 10     |      | 14.6580    |         |                                                             |                         |    |    |   |   |   |   |

Show detected proteins only  
 Show all proteins  
 Filter by category:

Proteins found: 1344

Enter (or paste) list of ORFs

Test Cutoff

| Signif | Direction | Applies To   |
|--------|-----------|--------------|
| yes    | +         | ratios, bars |
| no     | n/a       | bars         |
| yes    | -         | ratios, bars |
| yes    | +         | p-, q-Values |
| yes    | -         |              |

Fn Summary Table FnPg vs Fn FnSg vs Fn FnPgSg vs Fn FnPgSg vs FnPg FnSg vs FnPg FnPgSg vs FnSg Fn Coverage

| Protein | FnPgSg vs FnSg         |                      |          |          | Raw    |      | Normalized |          | Description                                                                        | Log <sub>2</sub> Ratios |    |    |   |   |   |   |
|---------|------------------------|----------------------|----------|----------|--------|------|------------|----------|------------------------------------------------------------------------------------|-------------------------|----|----|---|---|---|---|
|         | Log <sub>2</sub> Ratio | Log <sub>2</sub> Sum | q-Value  | p-Value  | FnPgSg | FnSg | FnPgSg     | FnSg     |                                                                                    | -6                      | -4 | -2 | 0 | 2 | 4 | 6 |
| FN0906  | -1.555                 | 8.858                | 7.235e-5 | 5.64e-5  | 13     | 26   | 14.8726    | 33.8420  | AAL95102.1  Glycerol-3-phosphate dehydrogenase [NAD(P)+]                           |                         |    |    |   |   |   |   |
|         |                        |                      |          |          | 7      | 40   | 10.2606    | 40.0000  |                                                                                    |                         |    |    |   |   |   |   |
| FN0908  | 0.218                  | 8.099                | 9.648e-2 | 4.619e-1 | 12     | 9    | 13.7286    | 11.7145  | AAL95104.1  Tpl protein                                                            |                         |    |    |   |   |   |   |
|         |                        |                      |          |          | 15     | 19   | 21.9870    | 19.0000  |                                                                                    |                         |    |    |   |   |   |   |
| FN0910  |                        |                      |          |          |        | 3    |            | 3.9048   | AAL95106.1  Nicotinate-nucleotide--dimethylbenzimidazole phosphoribosyltransferase |                         |    |    |   |   |   |   |
|         |                        |                      |          |          |        | 9    |            | 9.0000   |                                                                                    |                         |    |    |   |   |   |   |
| FN0911  | 0.246                  | 5.757                |          |          | 7      | 5    | 8.0083     | 6.5081   | AAL95107.1  Alpha-ribazole-5'-phosphate phosphatase                                |                         |    |    |   |   |   |   |
|         |                        |                      |          |          |        | 7    |            | 7.0000   |                                                                                    |                         |    |    |   |   |   |   |
| FN0912  |                        |                      |          |          |        | 9    |            | 11.7145  | AAL95108.1  Cobalamin [5'-phosphate] synthase                                      |                         |    |    |   |   |   |   |
|         |                        |                      |          |          |        | 7    |            | 7.0000   |                                                                                    |                         |    |    |   |   |   |   |
| FN0913  | -1.221                 | 4.779                |          |          | 3      |      | 3.4321     |          | AAL95109.1  Cobinamide kinase                                                      |                         |    |    |   |   |   |   |
|         |                        |                      |          |          |        | 8    |            | 8.0000   |                                                                                    |                         |    |    |   |   |   |   |
| FN0915  | -0.964                 | 10.857               | 5.083e-3 | 1.535e-2 | 27     | 54   | 30.8893    | 70.2873  | AAL95111.1  PTS system, N-acetylglucosamine-specific IIA component                 |                         |    |    |   |   |   |   |
|         |                        |                      |          |          | 21     | 50   | 30.7818    | 50.0000  |                                                                                    |                         |    |    |   |   |   |   |
| FN0916  | 0.683                  | 15.778               | 5.564e-3 | 1.721e-2 | 301    | 153  | 344.3583   | 199.1473 | AAL95112.1  Hypothetical Exported Protein                                          |                         |    |    |   |   |   |   |
|         |                        |                      |          |          | 175    | 175  | 256.5148   | 175.0000 |                                                                                    |                         |    |    |   |   |   |   |
| FN0917  | -1.570                 | 5.843                |          |          |        | 7    |            | 9.1113   | AAL95113.1  Hypothetical protein                                                   |                         |    |    |   |   |   |   |
|         |                        |                      |          |          | 3      | 17   | 4.3974     | 17.0000  |                                                                                    |                         |    |    |   |   |   |   |
| FN0920  |                        |                      |          |          | 7      |      | 8.0083     |          | AAL95116.1  Protease HTPX                                                          |                         |    |    |   |   |   |   |
|         |                        |                      |          |          | 5      |      | 7.3290     |          |                                                                                    |                         |    |    |   |   |   |   |
| FN0921  | -1.416                 | 8.545                | 2.97e-4  | 3.811e-4 | 13     | 27   | 14.8726    | 35.1436  | AAL95117.1  Hypothetical protein                                                   |                         |    |    |   |   |   |   |
|         |                        |                      |          |          | 6      | 28   | 8.7948     | 28.0000  |                                                                                    |                         |    |    |   |   |   |   |
| FN0922  |                        |                      |          |          | 3      |      | 3.4321     |          | AAL95118.1  Homoserine kinase                                                      |                         |    |    |   |   |   |   |
| FN0924  |                        |                      |          |          | 3      |      | 4.3974     |          | AAL95120.1  Hypothetical protein                                                   |                         |    |    |   |   |   |   |
| FN0925  | -0.082                 | 6.592                | 1.654e-1 | 8.574e-1 | 9      | 4    | 10.2964    | 5.2065   | AAL95121.1  Hypothetical protein                                                   |                         |    |    |   |   |   |   |
|         |                        |                      |          |          | 6      | 15   | 8.7948     | 15.0000  |                                                                                    |                         |    |    |   |   |   |   |
| FN0926  | -1.947                 | 8.625                | 5.59e-5  | 4.037e-5 | 10     | 30   | 11.4405    | 39.0485  | AAL95122.1  GTP pyrophosphokinase                                                  |                         |    |    |   |   |   |   |
|         |                        |                      |          |          | 6      | 39   | 8.7948     | 39.0000  |                                                                                    |                         |    |    |   |   |   |   |
| FN0928  | -0.231                 | 5.752                | 1.363e-1 | 6.826e-1 | 8      | 3    | 9.1524     | 3.9048   | AAL95124.1  O-sialoglycoprotein endopeptidase                                      |                         |    |    |   |   |   |   |
|         |                        |                      |          |          | 3      | 12   | 4.3974     | 12.0000  |                                                                                    |                         |    |    |   |   |   |   |

Show detected proteins only  
 Show all proteins  
 Filter by category:

Proteins found: 1344

Enter (or paste) list of ORFs

Find ORFs

Test Cutoff

q-Value p-Value

.005

| Signif | Direction | Applies To   |
|--------|-----------|--------------|
| yes    | +         | ratios, bars |
| no     | n/a       | bars         |
| yes    | -         | ratios, bars |
| yes    | +         | p-, q-Values |
| yes    | -         | p-, q-Values |

Dot Plots Dot Plots

Fn Summary Table FnPg vs Fn FnSg vs Fn FnPgSg vs Fn FnPgSg vs FnPg FnSg vs FnPg FnPgSg vs FnSg Fn Coverage

| Protein | FnPgSg vs FnSg         |                      |          |          | Raw    |      | Normalized |         | Description                                              | Log <sub>2</sub> Ratios |    |    |   |   |   |   |
|---------|------------------------|----------------------|----------|----------|--------|------|------------|---------|----------------------------------------------------------|-------------------------|----|----|---|---|---|---|
|         | Log <sub>2</sub> Ratio | Log <sub>2</sub> Sum | q-Value  | p-Value  | FnPgSg | FnSg | FnPgSg     | FnSg    |                                                          | -6                      | -4 | -2 | 0 | 2 | 4 | 6 |
| FN0929  | -1.635                 | 7.908                |          |          |        | 22   |            | 28.6356 | AAL95125.1  ATP/GTP hydrolase                            |                         |    |    |   |   |   |   |
|         |                        |                      |          |          | 6      | 26   | 8.7948     | 26.0000 |                                                          |                         |    |    |   |   |   |   |
| FN0930  |                        |                      |          |          |        |      |            |         | AAL95126.1  Glycerol-3-phosphate cytidyltransferase      |                         |    |    |   |   |   |   |
|         |                        |                      |          |          |        | 5    |            | 5.0000  |                                                          |                         |    |    |   |   |   |   |
| FN0932  | -1.489                 | 6.828                | 1.288e-2 | 4.732e-2 | 6      | 9    | 6.8643     | 11.7145 | AAL95128.1  Hypothetical protein                         |                         |    |    |   |   |   |   |
|         |                        |                      |          |          | 4      | 24   | 5.8632     | 24.0000 |                                                          |                         |    |    |   |   |   |   |
| FN0933  |                        |                      |          |          | 3      |      |            | 3.4321  | AAL95129.1  3-phosphoshikimate 1-carboxyvinyltransferase |                         |    |    |   |   |   |   |
|         |                        |                      |          |          |        |      |            |         |                                                          |                         |    |    |   |   |   |   |
| FN0934  |                        |                      |          |          |        | 30   |            | 39.0485 | AAL95130.1  Chorismate synthase                          |                         |    |    |   |   |   |   |
|         |                        |                      |          |          |        | 25   |            | 25.0000 |                                                          |                         |    |    |   |   |   |   |
| FN0938  |                        |                      |          |          |        | 42   |            | 54.6679 | AAL95134.1  Hypothetical protein                         |                         |    |    |   |   |   |   |
|         |                        |                      |          |          |        | 37   |            | 37.0000 |                                                          |                         |    |    |   |   |   |   |
| FN0940  | -0.777                 | 8.022                | 3.662e-3 | 9.905e-3 | 10     | 14   | 11.4405    | 18.2226 | AAL95136.1  Hypothetical protein                         |                         |    |    |   |   |   |   |
|         |                        |                      |          |          | 9      | 24   | 13.1922    | 24.0000 |                                                          |                         |    |    |   |   |   |   |
| FN0941  | -0.490                 | 10.596               | 2.751e-2 | 1.13e-1  | 26     | 44   | 29.7452    | 57.2711 | AAL95137.1  Gamma-glutamyltranspeptidase                 |                         |    |    |   |   |   |   |
|         |                        |                      |          |          | 25     | 36   | 36.6450    | 36.0000 |                                                          |                         |    |    |   |   |   |   |
| FN0943  | -2.274                 | 6.951                | 6.423e-3 | 2.057e-2 | 5      | 13   | 5.7202     | 16.9210 | AAL95139.1  Sensory Transduction Protein Kinase          |                         |    |    |   |   |   |   |
|         |                        |                      |          |          | 3      | 32   | 4.3974     | 32.0000 |                                                          |                         |    |    |   |   |   |   |
| FN0947  | 1.217                  | 12.376               | 2.641e-4 | 3.269e-4 | 88     | 32   | 100.6762   | 41.6517 | AAL95143.1  Hypothetical protein                         |                         |    |    |   |   |   |   |
|         |                        |                      |          |          | 83     | 54   | 121.6613   | 54.0000 |                                                          |                         |    |    |   |   |   |   |
| FN0949  | 1.790                  | 13.586               | 6.204e-6 | 1.333e-6 | 185    | 44   | 211.6488   | 57.2711 | AAL95145.1  DNA helicase                                 |                         |    |    |   |   |   |   |
|         |                        |                      |          |          | 137    | 62   | 200.8144   | 62.0000 |                                                          |                         |    |    |   |   |   |   |
| FN0951  |                        |                      |          |          |        | 7    |            | 7.0000  | AAL95147.1  Precorrin-3B C17-methyltransferase           |                         |    |    |   |   |   |   |
|         |                        |                      |          |          |        |      |            |         |                                                          |                         |    |    |   |   |   |   |
| FN0957  | 1.354                  | 7.881                | 5.589e-3 | 1.731e-2 | 16     | 4    | 18.3048    | 5.2065  | AAL95153.1  Precorrin-4 C11-methyltransferase            |                         |    |    |   |   |   |   |
|         |                        |                      |          |          | 21     | 14   | 30.7818    | 14.0000 |                                                          |                         |    |    |   |   |   |   |
| FN0958  |                        |                      |          |          |        | 7    |            | 7.0000  | AAL95154.1  unknown                                      |                         |    |    |   |   |   |   |
|         |                        |                      |          |          |        |      |            |         |                                                          |                         |    |    |   |   |   |   |
| FN0959  | 1.692                  | 6.336                |          |          | 18     |      | 20.5929    |         | AAL95155.1  Precorrin-2 C20-methyltransferase            |                         |    |    |   |   |   |   |
|         |                        |                      |          |          | 8      | 5    | 11.7264    | 5.0000  |                                                          |                         |    |    |   |   |   |   |
| FN0961  |                        |                      |          |          |        | 26   |            | 26.0000 | AAL95157.1  Hypothetical protein                         |                         |    |    |   |   |   |   |
|         |                        |                      |          |          |        |      |            |         |                                                          |                         |    |    |   |   |   |   |

Show detected proteins only  
 Show all proteins  
 Filter by category:

Proteins found: 1344

Enter (or paste) list of ORFs

Find ORFs

Test Cutoff

q-Value p-Value

.005

| Signif | Direction | Applies To   |
|--------|-----------|--------------|
| yes    | +         | ratios, bars |
| no     | n/a       | bars         |
| yes    | -         | ratios, bars |
| yes    | +         | p-, q-Values |
| yes    | -         | p-, q-Values |

Dot Plots Dot Plots

Fn Summary Table FnPg vs Fn FnSg vs Fn FnPgSg vs Fn FnPgSg vs FnPg FnSg vs FnPg FnPgSg vs FnSg Fn Coverage

| Protein | FnPgSg vs FnSg         |                      |          |          | Raw    |      | Normalized |          | Description                                                              | Log <sub>2</sub> Ratios |    |    |   |   |   |   |
|---------|------------------------|----------------------|----------|----------|--------|------|------------|----------|--------------------------------------------------------------------------|-------------------------|----|----|---|---|---|---|
|         | Log <sub>2</sub> Ratio | Log <sub>2</sub> Sum | q-Value  | p-Value  | FnPgSg | FnSg | FnPgSg     | FnSg     |                                                                          | -6                      | -4 | -2 | 0 | 2 | 4 | 6 |
| FN0962  | 0.638                  | 8.295                | 9.328e-3 | 3.223e-2 | 22     | 8    | 25.1690    | 10.4129  | AAL95158.1  Hypothetical cytosolic protein                               |                         |    |    |   |   |   |   |
|         |                        |                      |          |          | 13     | 18   | 19.0554    | 18.0000  |                                                                          |                         |    |    |   |   |   |   |
| FN0964  | -0.223                 | 5.970                |          |          |        | 7    |            | 9.1113   | AAL95160.1  Precorrin-8W decarboxylase                                   |                         |    |    |   |   |   |   |
|         |                        |                      |          |          | 5      | 8    | 7.3290     | 8.0000   |                                                                          |                         |    |    |   |   |   |   |
| FN0965  | -0.366                 | 11.523               | 5.008e-2 | 2.233e-1 | 31     | 57   | 35.4655    | 74.1921  | AAL95161.1  D-3-phosphoglycerate dehydrogenase                           |                         |    |    |   |   |   |   |
|         |                        |                      |          |          | 41     | 49   | 60.0977    | 49.0000  |                                                                          |                         |    |    |   |   |   |   |
| FN0966  |                        |                      |          |          |        |      |            |          | AAL95162.1  Precorrin-6Y C5,15-methyltransferase (decarboxylating)       |                         |    |    |   |   |   |   |
|         |                        |                      |          |          |        | 5    |            | 5.0000   |                                                                          |                         |    |    |   |   |   |   |
| FN0967  | -0.806                 | 4.364                |          |          | 3      |      | 3.4321     |          | AAL95163.1  CbiD protein                                                 |                         |    |    |   |   |   |   |
|         |                        |                      |          |          |        | 6    |            | 6.0000   |                                                                          |                         |    |    |   |   |   |   |
| FN0970  | 0.871                  | 7.724                | 8.098e-3 | 2.731e-2 | 19     | 5    | 21.7369    | 6.5081   | AAL95166.1  Precorrin-8X methylmutase                                    |                         |    |    |   |   |   |   |
|         |                        |                      |          |          | 12     | 15   | 17.5896    | 15.0000  |                                                                          |                         |    |    |   |   |   |   |
| FN0971  |                        |                      |          |          |        | 4    |            | 5.2065   | AAL95167.1  hypothetical cytosolic protein                               |                         |    |    |   |   |   |   |
|         |                        |                      |          |          |        |      |            |          |                                                                          |                         |    |    |   |   |   |   |
| FN0972  |                        |                      |          |          |        | 8    |            | 10.4129  | AAL95168.1  Cobyric acid a,c-diamide synthase                            |                         |    |    |   |   |   |   |
|         |                        |                      |          |          |        | 32   |            | 32.0000  |                                                                          |                         |    |    |   |   |   |   |
| FN0976  | -0.258                 | 11.269               | 6.759e-2 | 3.121e-1 | 41     | 32   | 46.9059    | 41.6517  | AAL95172.1  Hypothetical protein                                         |                         |    |    |   |   |   |   |
|         |                        |                      |          |          | 30     | 67   | 43.9740    | 67.0000  |                                                                          |                         |    |    |   |   |   |   |
| FN0977  | -0.998                 | 9.556                | 4.871e-3 | 1.453e-2 | 16     | 35   | 18.3048    | 45.5566  | AAL95173.1  Cobyric acid synthase                                        |                         |    |    |   |   |   |   |
|         |                        |                      |          |          | 14     | 32   | 20.5212    | 32.0000  |                                                                          |                         |    |    |   |   |   |   |
| FN0981  | 1.271                  | 13.175               | 2.399e-4 | 2.832e-4 | 142    | 59   | 162.4547   | 76.7954  | AAL95177.1  Phosphoribosylamine--glycine ligase                          |                         |    |    |   |   |   |   |
|         |                        |                      |          |          | 93     | 47   | 136.3193   | 47.0000  |                                                                          |                         |    |    |   |   |   |   |
| FN0982  | 0.088                  | 15.633               | 8.976e-2 | 4.266e-1 | 223    | 180  | 255.1226   | 234.2910 | AAL95178.1  Phosphoribosylaminoimidazolecarboxamide formyltransferase    |                         |    |    |   |   |   |   |
|         |                        |                      |          |          | 143    | 203  | 209.6092   | 203.0000 |                                                                          |                         |    |    |   |   |   |   |
| FN0983  | -0.620                 | 14.119               | 1.557e-3 | 3.386e-3 | 101    | 115  | 115.5488   | 149.6859 | AAL95179.1  Hypothetical protein                                         |                         |    |    |   |   |   |   |
|         |                        |                      |          |          | 68     | 181  | 99.6743    | 181.0000 |                                                                          |                         |    |    |   |   |   |   |
| FN0984  | -2.590                 | 9.313                | 3.545e-5 | 2.077e-5 | 9      | 49   | 10.2964    | 63.7792  | AAL95180.1  Tetracenomycin polyketide synthesis O-methyltransferase tcmP |                         |    |    |   |   |   |   |
|         |                        |                      |          |          | 7      | 60   | 10.2606    | 60.0000  |                                                                          |                         |    |    |   |   |   |   |
| FN0985  | -0.055                 | 8.334                | 1.523e-1 | 7.774e-1 | 18     | 12   | 20.5929    | 15.6194  | AAL95181.1  Phosphoribosylglycinamide formyltransferase                  |                         |    |    |   |   |   |   |
|         |                        |                      |          |          | 10     | 21   | 14.6580    | 21.0000  |                                                                          |                         |    |    |   |   |   |   |
| FN0986  | -0.175                 | 15.321               | 1.11e-1  | 5.399e-1 | 151    | 119  | 172.7512   | 154.8924 | AAL95182.1  Phosphoribosylformylglycinamide cyclo-ligase                 |                         |    |    |   |   |   |   |
|         |                        |                      |          |          | 142    | 275  | 208.1434   | 275.0000 |                                                                          |                         |    |    |   |   |   |   |

Show detected proteins only  
 Show all proteins  
 Filter by category:

Proteins found: 1344

Enter (or paste) list of ORFs

Find ORFs

Test Cutoff

q-Value .005

p-Value

| Signif | Direction | Applies To   |
|--------|-----------|--------------|
| yes    | +         | ratios, bars |
| no     | n/a       | bars         |
| yes    | -         | ratios, bars |
| yes    | +         | p-, q-Values |
| yes    | -         |              |

Dot Plots Dot Plots

Fn Summary Table FnPg vs Fn FnSg vs Fn FnPgSg vs Fn FnPgSg vs FnPg FnSg vs FnPg FnPgSg vs FnSg Fn Coverage

| Protein | FnPgSg vs FnSg         |                      |          |          | Raw    |      | Normalized |           | Description                                                | Log <sub>2</sub> Ratios |    |    |   |   |   |   |
|---------|------------------------|----------------------|----------|----------|--------|------|------------|-----------|------------------------------------------------------------|-------------------------|----|----|---|---|---|---|
|         | Log <sub>2</sub> Ratio | Log <sub>2</sub> Sum | q-Value  | p-Value  | FnPgSg | FnSg | FnPgSg     | FnSg      |                                                            | -6                      | -4 | -2 | 0 | 2 | 4 | 6 |
| FN0987  | -0.870                 | 13.680               | 1.512e-4 | 1.5e-4   | 70     | 112  | 80.0833    | 145.7811  | AAL95183.1                                                 |                         |    |    |   |   |   |   |
|         |                        |                      |          |          | 61     | 164  | 89.4137    | 164.0000  | Amidophosphoribosyltransferase                             |                         |    |    |   |   |   |   |
| FN0988  | 0.662                  | 16.530               | 2.478e-3 | 6.075e-3 | 351    | 156  | 401.5606   | 203.0522  | AAL95184.1                                                 |                         |    |    |   |   |   |   |
|         |                        |                      |          |          | 254    | 286  | 372.3128   | 286.0000  | Phosphoribosylamidoimidazole-succinocarboxamide synthase   |                         |    |    |   |   |   |   |
| FN0989  | 0.162                  | 15.499               | 1.027e-1 | 4.95e-1  | 184    | 116  | 210.5047   | 150.9875  | AAL95185.1                                                 |                         |    |    |   |   |   |   |
|         |                        |                      |          |          | 167    | 256  | 244.7884   | 256.0000  | Phosphoribosylaminoimidazole carboxylase catalytic subunit |                         |    |    |   |   |   |   |
| FN0990  | -0.554                 | 21.187               | 4.339e-5 | 2.86e-5  | 1063   | 1412 | 1216.1223  | 1837.8826 | AAL95186.1                                                 |                         |    |    |   |   |   |   |
|         |                        |                      |          |          | 910    | 1907 | 1333.8767  | 1907.0000 | Phosphoribosylformylglycinamide synthase                   |                         |    |    |   |   |   |   |
| FN0991  | 0.329                  | 9.956                | 8.242e-3 | 2.788e-2 | 31     | 24   | 35.4655    | 31.2388   | AAL95187.1                                                 |                         |    |    |   |   |   |   |
|         |                        |                      |          |          | 24     | 25   | 35.1792    | 25.0000   | CDP-diacylglycerol--serine O-phosphatidyltransferase       |                         |    |    |   |   |   |   |
| FN0992  | -0.278                 | 9.830                | 1.901e-2 | 7.43e-2  | 21     | 28   | 24.0250    | 36.4453   | AAL95188.1                                                 |                         |    |    |   |   |   |   |
|         |                        |                      |          |          | 21     | 30   | 30.7818    | 30.0000   | ADP-heptose:LPS heptosyltransferase II                     |                         |    |    |   |   |   |   |
| FN0994  | 0.649                  | 13.995               | 7.483e-3 | 2.481e-2 | 140    | 60   | 160.1666   | 78.0970   | AAL95190.1                                                 |                         |    |    |   |   |   |   |
|         |                        |                      |          |          | 109    | 126  | 159.7720   | 126.0000  | Hypothetical protein                                       |                         |    |    |   |   |   |   |
| FN0997  | -1.049                 | 11.106               | 2.015e-3 | 4.662e-3 | 34     | 60   | 38.8976    | 78.0970   | AAL95193.1                                                 |                         |    |    |   |   |   |   |
|         |                        |                      |          |          | 18     | 57   | 26.3844    | 57.0000   | Hypothetical protein                                       |                         |    |    |   |   |   |   |
| FN0998  | -1.839                 | 14.893               | 1.011e-5 | 2.998e-6 | 69     | 248  | 78.9393    | 322.8009  | AAL95194.1                                                 |                         |    |    |   |   |   |   |
|         |                        |                      |          |          | 72     | 337  | 105.5375   | 337.0000  | Dipeptide-binding protein                                  |                         |    |    |   |   |   |   |
| FN0999  | -2.326                 | 8.355                | 1.002e-5 | 2.944e-6 | 9      | 30   | 10.2964    | 39.0485   | AAL95195.1                                                 |                         |    |    |   |   |   |   |
|         |                        |                      |          |          | 4      | 42   | 5.8632     | 42.0000   | Deblocking aminopeptidase                                  |                         |    |    |   |   |   |   |
| FN1000  |                        |                      |          |          | 41     |      | 46.9059    |           | AAL95196.1                                                 |                         |    |    |   |   |   |   |
|         |                        |                      |          |          | 34     |      | 49.8372    |           | Biotin synthase                                            |                         |    |    |   |   |   |   |
| FN1001  | -0.909                 | 9.988                | 4.845e-4 | 7.161e-4 | 24     | 31   | 27.4571    | 40.3501   | AAL95197.1                                                 |                         |    |    |   |   |   |   |
|         |                        |                      |          |          | 13     | 47   | 19.0554    | 47.0000   | Dethiobiotin synthetase                                    |                         |    |    |   |   |   |   |
| FN1002  | 0.643                  | 10.051               | 1.64e-3  | 3.618e-3 | 34     | 17   | 38.8976    | 22.1275   | AAL95198.1                                                 |                         |    |    |   |   |   |   |
|         |                        |                      |          |          | 29     | 30   | 42.5082    | 30.0000   | Adenosylmethionine-8-amino-7-oxononanoate aminotransferase |                         |    |    |   |   |   |   |
| FN1003  | -1.332                 | 12.510               | 3.394e-4 | 4.533e-4 | 47     | 84   | 53.7702    | 109.3358  | AAL95199.1                                                 |                         |    |    |   |   |   |   |
|         |                        |                      |          |          | 29     | 133  | 42.5082    | 133.0000  | Outer membrane protein P1 precursor                        |                         |    |    |   |   |   |   |
| FN1004  | -0.657                 | 8.123                | 5.251e-2 | 2.356e-1 | 13     | 23   | 14.8726    | 29.9372   | AAL95200.1                                                 |                         |    |    |   |   |   |   |
|         |                        |                      |          |          | 8      | 12   | 11.7264    | 12.0000   | Transcriptional regulator, TetR family                     |                         |    |    |   |   |   |   |
| FN1005  | -0.678                 | 10.509               | 1.288e-2 | 4.73e-2  | 22     | 45   | 25.1690    | 58.5727   | AAL95201.1                                                 |                         |    |    |   |   |   |   |
|         |                        |                      |          |          | 24     | 38   | 35.1792    | 38.0000   | Hypothetical protein                                       |                         |    |    |   |   |   |   |

Show detected proteins only  
 Show all proteins  
 Filter by category:

Proteins found: 1344

Test Cutoff

| Signif | Direction | Applies To   |
|--------|-----------|--------------|
| yes    | +         | ratios, bars |
| no     | n/a       | bars         |
| yes    | -         | ratios, bars |
| yes    | +         | p-, q-Values |
| yes    | -         | p-, q-Values |

Fn Summary Table FnPg vs Fn FnSg vs Fn FnPgSg vs Fn FnPgSg vs FnPg FnSg vs FnPg FnPgSg vs FnSg Fn Coverage

| Protein | FnPgSg vs FnSg         |                      |          |          | Raw    |      | Normalized |           | Description                                                  | Log <sub>2</sub> Ratios |    |    |   |   |   |   |
|---------|------------------------|----------------------|----------|----------|--------|------|------------|-----------|--------------------------------------------------------------|-------------------------|----|----|---|---|---|---|
|         | Log <sub>2</sub> Ratio | Log <sub>2</sub> Sum | q-Value  | p-Value  | FnPgSg | FnSg | FnPgSg     | FnSg      |                                                              | -6                      | -4 | -2 | 0 | 2 | 4 | 6 |
| FN1006  |                        |                      |          |          |        | 12   |            | 12.0000   | AAL95202.1  Acetyltransferase                                |                         |    |    |   |   |   |   |
| FN1010  | 0.833                  | 14.222               | 6.179e-4 | 1.013e-3 | 165    | 90   | 188.7678   | 117.1455  | AAL95206.1  Hypothetical cytosolic protein                   |                         |    |    |   |   |   |   |
| FN1011  | -1.016                 | 6.119                |          |          |        | 9    |            | 11.7145   | AAL95207.1  MGPA protein                                     |                         |    |    |   |   |   |   |
| FN1012  | -1.711                 | 8.880                | 1.899e-3 | 4.333e-3 | 12     | 25   | 13.7286    | 32.5404   | AAL95208.1  HPR(Ser) kinase                                  |                         |    |    |   |   |   |   |
| FN1014  | -2.216                 | 7.871                | 6.417e-3 | 2.054e-2 | 6      | 33   | 6.8643     | 42.9533   | AAL95210.1  Folylpolylglutamate synthase                     |                         |    |    |   |   |   |   |
| FN1015  | 0.676                  | 7.895                | 7.405e-3 | 2.448e-2 | 20     | 8    | 22.8809    | 10.4129   | AAL95211.1  5'-methylthioadenosine nucleosidase              |                         |    |    |   |   |   |   |
| FN1016  | -2.227                 | 7.881                | 4.995e-4 | 7.466e-4 | 6      | 28   | 6.8643     | 36.4453   | AAL95212.1  Lipid A biosynthesis lauroyl acyltransferase     |                         |    |    |   |   |   |   |
| FN1017  | 0.499                  | 13.054               | 7.066e-3 | 2.31e-2  | 93     | 70   | 106.3964   | 91.1132   | AAL95213.1  Hypothetical Exported Protein                    |                         |    |    |   |   |   |   |
| FN1019  | 0.287                  | 23.883               | 8.102e-3 | 2.732e-2 | 3484   | 2651 | 3985.8610  | 3450.5855 | AAL95215.1  3-hydroxybutyryl-CoA dehydrogenase               |                         |    |    |   |   |   |   |
| FN1020  | -0.171                 | 17.801               | 1.036e-1 | 5.001e-1 | 331    | 478  | 378.6797   | 622.1727  | AAL95216.1  3-hydroxybutyryl-CoA dehydratase                 |                         |    |    |   |   |   |   |
| FN1022  |                        |                      |          |          | 9      |      | 10.2964    |           | AAL95218.1  Calcium-transporting ATPase                      |                         |    |    |   |   |   |   |
| FN1023  | -1.530                 | 7.533                |          |          | 7      | 24   | 8.0083     | 31.2388   | AAL95219.1  5-Nitroimidazole antibiotic resistance protein   |                         |    |    |   |   |   |   |
| FN1024  | 0.176                  | 20.436               | 1.063e-1 | 5.144e-1 | 1379   | 726  | 1577.6413  | 944.9736  | AAL95220.1  DNA-binding protein HU                           |                         |    |    |   |   |   |   |
| FN1025  | 0.797                  | 7.441                |          |          | 15     |      | 17.1607    |           | AAL95221.1  Guanine-hypoxanthine permease                    |                         |    |    |   |   |   |   |
| FN1026  |                        |                      |          |          |        | 6    |            | 6.0000    | AAL95222.1  tRNA pseudouridine synthase A                    |                         |    |    |   |   |   |   |
| FN1028  | 0.622                  | 9.997                | 9.951e-3 | 3.482e-2 | 36     | 25   | 41.1857    | 32.5404   | AAL95224.1  Deoxyuridine 5'-triphosphate nucleotidohydrolase |                         |    |    |   |   |   |   |

Show detected proteins only  
 Show all proteins  
 Filter by category:  
 GO: amino acid transport

Proteins found:  
 1344

Enter (or paste) list of ORFs

Test Cutoff

| Signif | Direction | Applies To   |
|--------|-----------|--------------|
| yes    | +         | ratios, bars |
| no     | n/a       | bars         |
| yes    | -         | ratios, bars |
| yes    | +         | p-, q-Values |
| yes    | -         | p-, q-Values |



Fn Summary Table FnPg vs Fn FnSg vs Fn FnPgSg vs Fn FnPgSg vs FnPg FnSg vs FnPg FnPgSg vs FnSg Fn Coverage

| Protein | FnPgSg vs FnSg         |                      |          |          | Raw    |      | Normalized |         | Description                                        | Log <sub>2</sub> Ratios |    |    |   |   |   |   |
|---------|------------------------|----------------------|----------|----------|--------|------|------------|---------|----------------------------------------------------|-------------------------|----|----|---|---|---|---|
|         | Log <sub>2</sub> Ratio | Log <sub>2</sub> Sum | q-Value  | p-Value  | FnPgSg | FnSg | FnPgSg     | FnSg    |                                                    | -6                      | -4 | -2 | 0 | 2 | 4 | 6 |
| FN1029  | 0.488                  | 11.815               | 1.641e-2 | 6.267e-2 | 73     | 41   | 83.5155    | 53.3663 | AAL95225.1  Zinc protease                          |                         |    |    |   |   |   |   |
|         |                        |                      |          |          | 40     | 48   | 58.6319    | 48.0000 |                                                    |                         |    |    |   |   |   |   |
| FN1030  | -1.171                 | 7.560                |          |          | 8      | 14   | 9.1524     | 18.2226 | AAL95226.1  Hypothetical membrane-spanning protein |                         |    |    |   |   |   |   |
|         |                        |                      |          |          |        | 23   |            | 23.0000 |                                                    |                         |    |    |   |   |   |   |
| FN1031  | -1.323                 | 5.596                |          |          |        |      |            |         | AAL95227.1  Hypothetical membrane-spanning protein |                         |    |    |   |   |   |   |
|         |                        |                      |          |          | 3      | 11   | 4.3974     | 11.0000 |                                                    |                         |    |    |   |   |   |   |
| FN1033  | -0.993                 | 10.538               | 4.381e-3 | 1.262e-2 | 26     | 49   | 29.7452    | 63.7792 | AAL95229.1  Methyltransferase                      |                         |    |    |   |   |   |   |
|         |                        |                      |          |          | 17     | 45   | 24.9186    | 45.0000 |                                                    |                         |    |    |   |   |   |   |
| FN1034  | -1.092                 | 5.480                |          |          | 4      | 5    | 4.5762     | 6.5081  | AAL95230.1  Transcriptional regulator, TetR family |                         |    |    |   |   |   |   |
|         |                        |                      |          |          |        | 13   |            | 13.0000 |                                                    |                         |    |    |   |   |   |   |
| FN1035  |                        |                      |          |          |        |      |            |         | AAL95231.1  Iron-sulfur flavoprotein               |                         |    |    |   |   |   |   |
|         |                        |                      |          |          |        | 3    |            | 3.0000  |                                                    |                         |    |    |   |   |   |   |
| FN1036  |                        |                      |          |          |        |      |            |         | AAL95232.1  Hypothetical protein                   |                         |    |    |   |   |   |   |
|         |                        |                      |          |          |        | 3    |            | 3.9048  |                                                    |                         |    |    |   |   |   |   |
| FN1037  | -2.322                 | 5.880                |          |          | 3      | 11   | 3.4321     | 14.3178 | AAL95233.1  Hypothetical cytosolic protein         |                         |    |    |   |   |   |   |
|         |                        |                      |          |          |        | 20   |            | 20.0000 |                                                    |                         |    |    |   |   |   |   |
| FN1041  | -0.779                 | 7.337                | 4.189e-3 | 1.186e-2 | 8      | 11   | 9.1524     | 14.3178 | AAL95237.1  Acetyltransferase                      |                         |    |    |   |   |   |   |
|         |                        |                      |          |          | 7      | 19   | 10.2606    | 19.0000 |                                                    |                         |    |    |   |   |   |   |
| FN1042  | 0.485                  | 8.826                | 2.127e-2 | 8.474e-2 | 21     | 10   | 24.0250    | 13.0162 | AAL95238.1  S1 RNA binding domain                  |                         |    |    |   |   |   |   |
|         |                        |                      |          |          | 18     | 23   | 26.3844    | 23.0000 |                                                    |                         |    |    |   |   |   |   |
| FN1048  | -0.186                 | 3.744                |          |          | 3      | 3    | 3.4321     | 3.9048  | AAL95244.1  Hypothetical membrane-spanning protein |                         |    |    |   |   |   |   |
|         |                        |                      |          |          |        |      |            |         |                                                    |                         |    |    |   |   |   |   |
| FN1055  | -0.712                 | 11.624               | 6.778e-4 | 1.149e-3 | 37     | 59   | 42.3298    | 76.7954 | AAL95251.1  Cysteine synthase                      |                         |    |    |   |   |   |   |
|         |                        |                      |          |          | 31     | 67   | 45.4398    | 67.0000 |                                                    |                         |    |    |   |   |   |   |
| FN1057  |                        |                      |          |          |        | 17   |            | 22.1275 | AAL95253.1  Diamine acetyltransferase              |                         |    |    |   |   |   |   |
|         |                        |                      |          |          |        | 5    |            | 5.0000  |                                                    |                         |    |    |   |   |   |   |
| FN1060  | -0.653                 | 10.198               | 8.286e-4 | 1.513e-3 | 26     | 33   | 29.7452    | 42.9533 | AAL95256.1  hypothetical cytosolic protein         |                         |    |    |   |   |   |   |
|         |                        |                      |          |          | 17     | 43   | 24.9186    | 43.0000 |                                                    |                         |    |    |   |   |   |   |
| FN1062  | 1.814                  | 12.371               | 3.726e-5 | 2.245e-5 | 113    | 22   | 129.2774   | 28.6356 | AAL95258.1  Hydrolase                              |                         |    |    |   |   |   |   |
|         |                        |                      |          |          | 98     | 49   | 143.6483   | 49.0000 |                                                    |                         |    |    |   |   |   |   |
| FN1063  | -2.684                 | 7.073                |          |          | 4      | 16   | 4.5762     | 20.8259 | AAL95259.1  N-acyl-L-amino acid amidohydrolase     |                         |    |    |   |   |   |   |
|         |                        |                      |          |          |        | 38   |            | 38.0000 |                                                    |                         |    |    |   |   |   |   |

Show detected proteins only  
 Show all proteins  
 Filter by category:

Proteins found:  
1344

Enter (or paste) list of ORFs

Find ORFs

Test Cutoff

q-Value

p-Value

.005

| Signif | Direction | Applies To   |
|--------|-----------|--------------|
| yes    | +         | ratios, bars |
| no     | n/a       | bars         |
| yes    | -         | ratios, bars |
| yes    | +         | p-, q-Values |
| yes    | -         | p-, q-Values |

Dot Plots

Fn Summary Table FnPg vs Fn FnSg vs Fn FnPgSg vs Fn FnPgSg vs FnPg FnSg vs FnPg FnPgSg vs FnSg Fn Coverage

| Protein | FnPgSg vs FnSg         |                      |          |          | Raw    |      | Normalized |          | Description                                                    | Log <sub>2</sub> Ratios |    |    |   |   |   |   |
|---------|------------------------|----------------------|----------|----------|--------|------|------------|----------|----------------------------------------------------------------|-------------------------|----|----|---|---|---|---|
|         | Log <sub>2</sub> Ratio | Log <sub>2</sub> Sum | q-Value  | p-Value  | FnPgSg | FnSg | FnPgSg     | FnSg     |                                                                | -6                      | -4 | -2 | 0 | 2 | 4 | 6 |
| FN1066  | -0.884                 | 7.393                | 2.037e-5 | 9.641e-6 | 9      | 14   | 10.2964    | 18.2226  | AAL95262.1  Exodeoxyribonuclease VII large subunit             |                         |    |    |   |   |   |   |
|         |                        |                      |          |          | 6      | 17   | 8.7948     | 17.0000  |                                                                |                         |    |    |   |   |   |   |
| FN1067  | -1.081                 | 11.464               | 3.276e-4 | 4.341e-4 | 28     | 65   | 32.0333    | 84.6051  | AAL95263.1  Tetratricopeptide repeat family protein            |                         |    |    |   |   |   |   |
|         |                        |                      |          |          | 28     | 70   | 41.0424    | 70.0000  |                                                                |                         |    |    |   |   |   |   |
| FN1068  |                        |                      |          |          |        | 16   |            | 20.8259  | AAL95264.1  Smf protein                                        |                         |    |    |   |   |   |   |
|         |                        |                      |          |          |        | 13   |            | 13.0000  |                                                                |                         |    |    |   |   |   |   |
| FN1069  | 0.337                  | 11.039               | 5.03e-2  | 2.244e-1 | 44     | 22   | 50.3381    | 28.6356  | AAL95265.1  DNA topoisomerase I                                |                         |    |    |   |   |   |   |
|         |                        |                      |          |          | 36     | 53   | 52.7687    | 53.0000  |                                                                |                         |    |    |   |   |   |   |
| FN1070  | 0.705                  | 7.125                | 9.987e-3 | 3.497e-2 | 11     | 5    | 12.5845    | 6.5081   | AAL95266.1  Glucose inhibited division protein A               |                         |    |    |   |   |   |   |
|         |                        |                      |          |          | 12     | 12   | 17.5896    | 12.0000  |                                                                |                         |    |    |   |   |   |   |
| FN1071  | 0.779                  | 4.779                |          |          | 6      |      | 6.8643     |          | AAL95267.1  Integrase/recombinase                              |                         |    |    |   |   |   |   |
|         |                        |                      |          |          |        | 4    |            | 4.0000   |                                                                |                         |    |    |   |   |   |   |
| FN1072  | 0.276                  | 9.483                | 8.59e-2  | 4.065e-1 | 22     | 12   | 25.1690    | 15.6194  | AAL95268.1  GTP-binding protein                                |                         |    |    |   |   |   |   |
|         |                        |                      |          |          | 23     | 33   | 33.7134    | 33.0000  |                                                                |                         |    |    |   |   |   |   |
| FN1073  | -1.097                 | 5.370                |          |          |        | 6    |            | 7.8097   | AAL95269.1  Hypothetical protein                               |                         |    |    |   |   |   |   |
|         |                        |                      |          |          | 3      | 11   | 4.3974     | 11.0000  |                                                                |                         |    |    |   |   |   |   |
| FN1074  | -0.619                 | 9.409                | 3.889e-3 | 1.073e-2 | 15     | 22   | 17.1607    | 28.6356  | AAL95270.1  Signal recognition particle receptor FtsY          |                         |    |    |   |   |   |   |
|         |                        |                      |          |          | 17     | 36   | 24.9186    | 36.0000  |                                                                |                         |    |    |   |   |   |   |
| FN1075  |                        |                      |          |          |        | 7    |            | 7.0000   | AAL95271.1  Hypothetical protein                               |                         |    |    |   |   |   |   |
| FN1077  | 2.160                  | 8.988                | 2.331e-4 | 2.717e-4 | 41     | 11   | 46.9059    | 14.3178  | AAL95273.1  Hypothetical protein                               |                         |    |    |   |   |   |   |
|         |                        |                      |          |          | 33     | 7    | 48.3714    | 7.0000   |                                                                |                         |    |    |   |   |   |   |
| FN1078  | -0.071                 | 15.034               | 1.212e-1 | 5.969e-1 | 133    | 144  | 152.1583   | 187.4328 | AAL95274.1  Hypothetical exported 24-amino acid repeat protein |                         |    |    |   |   |   |   |
|         |                        |                      |          |          | 140    | 188  | 205.2118   | 188.0000 |                                                                |                         |    |    |   |   |   |   |
| FN1079  | -0.408                 | 19.196               | 3.785e-3 | 1.035e-2 | 638    | 748  | 729.9022   | 973.6092 | AAL95275.1  Neutrophil-activating protein A                    |                         |    |    |   |   |   |   |
|         |                        |                      |          |          | 420    | 812  | 615.6354   | 812.0000 |                                                                |                         |    |    |   |   |   |   |
| FN1080  | -0.934                 | 6.274                | 5.287e-3 | 1.613e-2 | 6      | 11   | 6.8643     | 14.3178  | AAL95276.1  Export ABC transporter                             |                         |    |    |   |   |   |   |
|         |                        |                      |          |          | 4      | 10   | 5.8632     | 10.0000  |                                                                |                         |    |    |   |   |   |   |
| FN1081  |                        |                      |          |          | 18     |      | 20.5929    |          | AAL95277.1  unknown                                            |                         |    |    |   |   |   |   |
|         |                        |                      |          |          | 15     |      | 21.9870    |          |                                                                |                         |    |    |   |   |   |   |
| FN1082  |                        |                      |          |          | 4      |      | 4.5762     |          | AAL95278.1  unknown                                            |                         |    |    |   |   |   |   |

Show detected proteins only  
 Show all proteins  
 Filter by category:

Proteins found: 1344

Test Cutoff

| Signif | Direction | Applies To   |
|--------|-----------|--------------|
| yes    | +         | ratios, bars |
| no     | n/a       | bars         |
| yes    | -         | ratios, bars |
| yes    | +         | p-, q-Values |
| yes    | -         |              |

Fn Summary Table FnPg vs Fn FnSg vs Fn FnPgSg vs Fn FnPgSg vs FnPg FnSg vs FnPg FnPgSg vs FnSg Fn Coverage

| Protein | FnPgSg vs FnSg         |                      |          |          | Raw    |      | Normalized |          | Description                                                                       | Log <sub>2</sub> Ratios |    |    |   |   |   |   |
|---------|------------------------|----------------------|----------|----------|--------|------|------------|----------|-----------------------------------------------------------------------------------|-------------------------|----|----|---|---|---|---|
|         | Log <sub>2</sub> Ratio | Log <sub>2</sub> Sum | q-Value  | p-Value  | FnPgSg | FnSg | FnPgSg     | FnSg     |                                                                                   | -6                      | -4 | -2 | 0 | 2 | 4 | 6 |
| FN1084  | 2.604                  | 10.889               | 2.093e-3 | 4.89e-3  | 75     | 11   | 85.8036    | 14.3178  | AAL95280.1  unknown                                                               |                         |    |    |   |   |   |   |
|         |                        |                      |          |          | 88     | 21   | 128.9903   | 21.0000  |                                                                                   | ■                       |    |    |   |   |   |   |
| FN1085  | -0.840                 | 12.514               | 7.008e-4 | 1.201e-3 | 41     | 85   | 46.9059    | 110.6374 | AAL95281.1  4-methyl-5(B-hydroxyethyl)-thiazole monophosphate biosynthesis enzyme |                         |    |    |   |   |   |   |
|         |                        |                      |          |          | 46     | 94   | 67.4267    | 94.0000  |                                                                                   | ■                       |    |    |   |   |   |   |
| FN1086  | -0.726                 | 7.992                | 2.121e-2 | 8.449e-2 | 14     | 20   | 16.0167    | 26.0323  | AAL95282.1  Transporter                                                           |                         |    |    |   |   |   |   |
|         |                        |                      |          |          | 6      | 15   | 8.7948     | 15.0000  |                                                                                   | ■                       |    |    |   |   |   |   |
| FN1088  | 0.025                  | 10.446               | 1.533e-1 | 7.834e-1 | 30     | 30   | 34.3214    | 39.0485  | AAL95284.1  NADH oxidase                                                          |                         |    |    |   |   |   |   |
|         |                        |                      |          |          | 28     | 35   | 41.0424    | 35.0000  |                                                                                   |                         |    |    |   |   |   |   |
| FN1089  | -2.901                 | 13.022               | 8.523e-4 | 1.576e-3 | 34     | 164  | 38.8976    | 213.4651 | AAL95285.1  ATP-binding protein (contains P-loop)                                 |                         |    |    |   |   |   |   |
|         |                        |                      |          |          | 19     | 285  | 27.8502    | 285.0000 |                                                                                   | ■                       |    |    |   |   |   |   |
| FN1091  | 0.095                  | 7.752                | 1.414e-1 | 7.125e-1 | 15     | 8    | 17.1607    | 10.4129  | AAL95287.1  Sigma factor sigB regulation protein rsbU                             |                         |    |    |   |   |   |   |
|         |                        |                      |          |          | 9      | 18   | 13.1922    | 18.0000  |                                                                                   |                         |    |    |   |   |   |   |
| FN1092  | -1.405                 | 11.288               | 3.51e-3  | 9.371e-3 | 14     | 62   | 16.0167    | 80.7002  | AAL95288.1  Hypothetical protein                                                  |                         |    |    |   |   |   |   |
|         |                        |                      |          |          | 31     | 82   | 45.4398    | 82.0000  |                                                                                   | ■                       |    |    |   |   |   |   |
| FN1093  | 1.332                  | 10.706               | 8.764e-4 | 1.633e-3 | 57     | 15   | 65.2107    | 19.5242  | AAL95289.1  Hypothetical protein                                                  |                         |    |    |   |   |   |   |
|         |                        |                      |          |          | 44     | 32   | 64.4951    | 32.0000  |                                                                                   | ■                       |    |    |   |   |   |   |
| FN1094  |                        |                      |          |          |        | 13   |            | 16.9210  | AAL95290.1  Dolichol-phosphate mannosyltransferase                                |                         |    |    |   |   |   |   |
|         |                        |                      |          |          |        | 24   |            | 24.0000  |                                                                                   |                         |    |    |   |   |   |   |
| FN1096  | 0.666                  | 10.166               | 3.181e-2 | 1.332e-1 | 49     | 16   | 56.0583    | 20.8259  | AAL95292.1  Hypothetical protein                                                  |                         |    |    |   |   |   |   |
|         |                        |                      |          |          | 20     | 33   | 29.3160    | 33.0000  |                                                                                   | ■                       |    |    |   |   |   |   |
| FN1097  | 1.098                  | 7.098                |          |          | 12     |      | 13.7286    |          | AAL95293.1  Hypothetical protein                                                  |                         |    |    |   |   |   |   |
|         |                        |                      |          |          | 14     | 8    | 20.5212    | 8.0000   |                                                                                   | ■                       |    |    |   |   |   |   |
| FN1101  | -1.221                 | 4.779                |          |          | 3      |      | 3.4321     |          | AAL95297.1  ATPase                                                                |                         |    |    |   |   |   |   |
|         |                        |                      |          |          |        | 8    |            | 8.0000   |                                                                                   | ■                       |    |    |   |   |   |   |
| FN1102  |                        |                      |          |          |        |      |            |          | AAL95298.1  tRNA 2'phosphotransferase                                             |                         |    |    |   |   |   |   |
|         |                        |                      |          |          |        | 10   |            | 10.0000  |                                                                                   |                         |    |    |   |   |   |   |
| FN1103  | -1.340                 | 10.659               | 5.227e-4 | 7.95e-4  | 16     | 43   | 18.3048    | 55.9695  | AAL95299.1  Excinuclease ABC subunit A                                            |                         |    |    |   |   |   |   |
|         |                        |                      |          |          | 22     | 72   | 32.2476    | 72.0000  |                                                                                   | ■                       |    |    |   |   |   |   |
| FN1104  |                        |                      |          |          | 5      |      | 5.7202     |          | AAL95300.1  Holliday junction DNA helicase ruvA                                   |                         |    |    |   |   |   |   |
|         |                        |                      |          |          |        |      |            |          |                                                                                   |                         |    |    |   |   |   |   |
| FN1105  | 0.907                  | 11.931               | 7.415e-7 | 8.423e-8 | 74     | 34   | 84.6595    | 44.2550  | AAL95301.1  Hypothetical protein                                                  |                         |    |    |   |   |   |   |
|         |                        |                      |          |          | 59     | 47   | 86.4821    | 47.0000  |                                                                                   | ■                       |    |    |   |   |   |   |

Show detected proteins only  
 Show all proteins  
 Filter by category:

Proteins found: 1344

Test Cutoff

| Signif | Direction | Applies To   |
|--------|-----------|--------------|
| ■      | +         | ratios, bars |
| ■      | n/a       | bars         |
| ■      | -         | ratios, bars |
| ■      | +         | p-, q-Values |
| ■      | -         |              |

Fn Summary Table

FnPg vs Fn

FnSg vs Fn

FnPgSg vs Fn

FnPgSg vs FnPg

FnSg vs FnPg

FnPgSg vs FnSg

Fn Coverage

| Protein | FnPgSg vs FnSg         |                      |          |          | Raw    |      | Normalized |          | Description                                             | Log <sub>2</sub> Ratios |    |    |   |   |   |   |
|---------|------------------------|----------------------|----------|----------|--------|------|------------|----------|---------------------------------------------------------|-------------------------|----|----|---|---|---|---|
|         | Log <sub>2</sub> Ratio | Log <sub>2</sub> Sum | q-Value  | p-Value  | FnPgSg | FnSg | FnPgSg     | FnSg     |                                                         | -6                      | -4 | -2 | 0 | 2 | 4 | 6 |
| FN1106  | -0.445                 | 11.477               | 1.421e-2 | 5.298e-2 | 39     | 55   | 44.6178    | 71.5889  | AAL95302.1  L-serine dehydratase                        |                         |    |    |   |   |   |   |
|         |                        |                      |          |          | 32     | 53   | 46.9056    | 53.0000  |                                                         |                         |    |    |   |   |   |   |
| FN1111  | -0.607                 | 7.330                | 2.488e-3 | 6.108e-3 | 9      | 11   | 10.2964    | 14.3178  | AAL95307.1  Dipeptide-binding protein                   |                         |    |    |   |   |   |   |
|         |                        |                      |          |          | 7      | 17   | 10.2606    | 17.0000  |                                                         |                         |    |    |   |   |   |   |
| FN1117  | 2.544                  | 10.529               | 1.757e-5 | 7.374e-6 | 79     | 16   | 90.3797    | 20.8259  | AAL95313.1  LSU ribosomal protein L21P                  |                         |    |    |   |   |   |   |
|         |                        |                      |          |          | 65     | 11   | 95.2769    | 11.0000  |                                                         |                         |    |    |   |   |   |   |
| FN1119  | 3.015                  | 12.869               | 2.552e-5 | 1.297e-5 | 230    | 16   | 263.1309   | 20.8259  | AAL95315.1  LSU ribosomal protein L27P                  |                         |    |    |   |   |   |   |
|         |                        |                      |          |          | 156    | 40   | 228.6646   | 40.0000  |                                                         |                         |    |    |   |   |   |   |
| FN1120  | -0.904                 | 15.279               | 1.126e-5 | 3.526e-6 | 128    | 207  | 146.4381   | 269.4346 | AAL95316.1  Phosphoenolpyruvate carboxykinase (ATP)     |                         |    |    |   |   |   |   |
|         |                        |                      |          |          | 99     | 276  | 145.1141   | 276.0000 |                                                         |                         |    |    |   |   |   |   |
| FN1121  | 0.318                  | 12.651               | 5.013e-3 | 1.509e-2 | 72     | 52   | 82.3714    | 67.6841  | AAL95317.1  hypothetical cytosolic protein              |                         |    |    |   |   |   |   |
|         |                        |                      |          |          | 66     | 76   | 96.7427    | 76.0000  |                                                         |                         |    |    |   |   |   |   |
| FN1122  | 1.142                  | 13.439               | 4.401e-4 | 6.299e-4 | 143    | 66   | 163.5988   | 85.9067  | AAL95318.1  Long-chain-fatty-acid--CoA ligase           |                         |    |    |   |   |   |   |
|         |                        |                      |          |          | 102    | 56   | 149.5115   | 56.0000  |                                                         |                         |    |    |   |   |   |   |
| FN1123  | 1.882                  | 8.425                | 1.103e-2 | 3.946e-2 | 43     | 11   | 49.1940    | 14.3178  | AAL95319.1  Thioredoxin-like protein                    |                         |    |    |   |   |   |   |
|         |                        |                      |          |          | 15     | 5    | 21.9870    | 5.0000   |                                                         |                         |    |    |   |   |   |   |
| FN1124  | 0.016                  | 17.157               | 1.577e-1 | 8.097e-1 | 312    | 286  | 356.9428   | 372.2623 | AAL95320.1  Outer membrane porin F                      |                         |    |    |   |   |   |   |
|         |                        |                      |          |          | 281    | 388  | 411.8894   | 388.0000 |                                                         |                         |    |    |   |   |   |   |
| FN1125  | -0.730                 | 12.400               | 5.505e-3 | 1.698e-2 | 46     | 84   | 52.6262    | 109.3358 | AAL95321.1  LemA protein                                |                         |    |    |   |   |   |   |
|         |                        |                      |          |          | 42     | 80   | 61.5635    | 80.0000  |                                                         |                         |    |    |   |   |   |   |
| FN1127  | -0.605                 | 11.533               | 1.751e-4 | 1.824e-4 | 40     | 54   | 45.7619    | 70.2873  | AAL95323.1  Hypothetical membrane-spanning protein      |                         |    |    |   |   |   |   |
|         |                        |                      |          |          | 29     | 64   | 42.5082    | 64.0000  |                                                         |                         |    |    |   |   |   |   |
| FN1128  | -0.018                 | 15.108               | 1.414e-1 | 7.122e-1 | 156    | 140  | 178.4714   | 182.2263 | AAL95324.1  Acylamino-acid-releasing enzyme             |                         |    |    |   |   |   |   |
|         |                        |                      |          |          | 133    | 196  | 194.9512   | 196.0000 |                                                         |                         |    |    |   |   |   |   |
| FN1129  | 0.212                  | 6.249                | 1.142e-1 | 5.575e-1 | 10     | 4    | 11.4405    | 5.2065   | AAL95325.1  Chromosome partition protein smc            |                         |    |    |   |   |   |   |
|         |                        |                      |          |          | 5      | 11   | 7.3290     | 11.0000  |                                                         |                         |    |    |   |   |   |   |
| FN1130  | -0.265                 | 6.654                |          |          | 8      |      | 9.1524     |          | AAL95326.1  Tetraacyldisaccharide 4'-kinase             |                         |    |    |   |   |   |   |
|         |                        |                      |          |          |        | 11   |            | 11.0000  |                                                         |                         |    |    |   |   |   |   |
| FN1131  | -1.028                 | 4.586                |          |          | 3      |      | 3.4321     |          | AAL95327.1  Hypothetical protein                        |                         |    |    |   |   |   |   |
|         |                        |                      |          |          |        | 7    |            | 7.0000   |                                                         |                         |    |    |   |   |   |   |
| FN1133  | 0.070                  | 9.985                | 1.316e-1 | 6.553e-1 | 25     | 27   | 28.6012    | 35.1436  | AAL95329.1  N-acetylglucosamine-6-phosphate deacetylase |                         |    |    |   |   |   |   |
|         |                        |                      |          |          | 25     | 27   | 36.6450    | 27.0000  |                                                         |                         |    |    |   |   |   |   |

- Show detected proteins only
- Show all proteins

Filter by category:  
GO: amino acid transport

Proteins found:  
1344

Enter (or paste) list of ORFs

Find ORFs

Test

Cutoff

q-Value

p-Value

.005

| Signif | Direction | Applies To   |
|--------|-----------|--------------|
| yes    | +         | ratios, bars |
| no     | n/a       | bars         |
| yes    | -         | ratios, bars |
| yes    | +         | p-, q-Values |
| yes    | -         | p-, q-Values |

Dot Plots Dot Plots

Fn Summary Table FnPg vs Fn FnSg vs Fn FnPgSg vs Fn FnPgSg vs FnPg FnSg vs FnPg FnPgSg vs FnSg Fn Coverage

| Protein | FnPgSg vs FnSg         |                      |          |          | Raw    |      | Normalized |          | Description                                                     | Log <sub>2</sub> Ratios |    |    |   |   |   |   |
|---------|------------------------|----------------------|----------|----------|--------|------|------------|----------|-----------------------------------------------------------------|-------------------------|----|----|---|---|---|---|
|         | Log <sub>2</sub> Ratio | Log <sub>2</sub> Sum | q-Value  | p-Value  | FnPgSg | FnSg | FnPgSg     | FnSg     |                                                                 | -6                      | -4 | -2 | 0 | 2 | 4 | 6 |
| FN1134  | 1.652                  | 7.652                |          |          | 26     |      | 29.7452    |          | AAL95330.1  Hypothetical cytosolic protein                      |                         |    |    |   |   |   |   |
|         |                        |                      |          |          | 14     | 8    | 20.5212    | 8.0000   |                                                                 |                         |    |    |   |   |   |   |
| FN1135  | 0.184                  | 14.164               | 2.162e-2 | 8.642e-2 | 123    | 107  | 140.7178   | 139.2730 | AAL95331.1  Phosphonates-binding protein                        |                         |    |    |   |   |   |   |
|         |                        |                      |          |          | 101    | 115  | 148.0457   | 115.0000 |                                                                 |                         |    |    |   |   |   |   |
| FN1136  | -1.052                 | 8.428                | 2.163e-3 | 5.096e-3 | 11     | 18   | 12.5845    | 23.4291  | AAL95332.1  Phosphonates transport ATP-binding protein phnC     |                         |    |    |   |   |   |   |
|         |                        |                      |          |          | 9      | 30   | 13.1922    | 30.0000  |                                                                 |                         |    |    |   |   |   |   |
| FN1137  |                        |                      |          |          |        |      |            |          | AAL95333.1  Phosphonates transport system permease protein phnE |                         |    |    |   |   |   |   |
|         |                        |                      |          |          | 3      |      | 4.3974     |          |                                                                 |                         |    |    |   |   |   |   |
| FN1138  | 1.098                  | 19.059               | 4.851e-3 | 1.445e-2 | 1147   | 491  | 1312.2223  | 639.0937 | AAL95334.1  Hypothetical cytosolic protein                      |                         |    |    |   |   |   |   |
|         |                        |                      |          |          | 580    | 371  | 850.1632   | 371.0000 |                                                                 |                         |    |    |   |   |   |   |
| FN1139  | -3.989                 | 10.621               | 4.891e-4 | 7.255e-4 | 11     | 107  | 12.5845    | 139.2730 | AAL95335.1  Activator of (R)-2-hydroxyglutaryl-CoA dehydratase  |                         |    |    |   |   |   |   |
|         |                        |                      |          |          | 5      | 177  | 7.3290     | 177.0000 |                                                                 |                         |    |    |   |   |   |   |
| FN1140  |                        |                      |          |          |        |      |            |          | AAL95336.1  hypothetical protein                                |                         |    |    |   |   |   |   |
|         |                        |                      |          |          |        | 10   |            | 13.0162  |                                                                 |                         |    |    |   |   |   |   |
| FN1142  | -0.944                 | 4.502                |          |          | 3      | 4    | 3.4321     | 5.2065   | AAL95338.1  Oxygen-independent coproporphyrinogen III oxidase   |                         |    |    |   |   |   |   |
|         |                        |                      |          |          |        |      |            | 8.0000   |                                                                 |                         |    |    |   |   |   |   |
| FN1143  | -1.354                 | 14.678               | 4.952e-3 | 1.485e-2 | 104    | 244  | 118.9809   | 317.5944 | AAL95339.1  Glucosamine-6-phosphate isomerase                   |                         |    |    |   |   |   |   |
|         |                        |                      |          |          | 57     | 200  | 83.5505    | 200.0000 |                                                                 |                         |    |    |   |   |   |   |
| FN1144  | 0.771                  | 14.774               | 6.158e-5 | 4.586e-5 | 199    | 107  | 227.6654   | 139.2730 | AAL95340.1  Hypothetical Exported Protein                       |                         |    |    |   |   |   |   |
|         |                        |                      |          |          | 143    | 117  | 209.6092   | 117.0000 |                                                                 |                         |    |    |   |   |   |   |
| FN1145  | 0.231                  | 8.926                | 1.092e-1 | 5.303e-1 | 20     | 9    | 22.8809    | 11.7145  | AAL95341.1  Oligoendopeptidase F                                |                         |    |    |   |   |   |   |
|         |                        |                      |          |          | 17     | 29   | 24.9186    | 29.0000  |                                                                 |                         |    |    |   |   |   |   |
| FN1146  |                        |                      |          |          | 17     |      | 19.4488    |          | AAL95342.1  Hypothetical exported 24-amino acid repeat protein  |                         |    |    |   |   |   |   |
|         |                        |                      |          |          | 19     |      | 27.8502    |          |                                                                 |                         |    |    |   |   |   |   |
| FN1147  |                        |                      |          |          | 33     |      | 37.7536    |          | AAL95343.1  Hypothetical protein                                |                         |    |    |   |   |   |   |
|         |                        |                      |          |          | 43     |      | 63.0293    |          |                                                                 |                         |    |    |   |   |   |   |
| FN1148  | -0.319                 | 11.331               | 2.232e-3 | 5.304e-3 | 41     | 41   | 46.9059    | 53.3663  | AAL95344.1  Serine/threonine sodium symporter                   |                         |    |    |   |   |   |   |
|         |                        |                      |          |          | 30     | 60   | 43.9740    | 60.0000  |                                                                 |                         |    |    |   |   |   |   |
| FN1149  | -0.895                 | 6.949                | 1.095e-2 | 3.909e-2 | 4      | 11   | 4.5762     | 14.3178  | AAL95345.1  ATP-dependent nuclease subunit A                    |                         |    |    |   |   |   |   |
|         |                        |                      |          |          | 8      | 16   | 11.7264    | 16.0000  |                                                                 |                         |    |    |   |   |   |   |
| FN1150  | -0.256                 | 5.359                |          |          |        |      |            |          | AAL95346.1  unknown                                             |                         |    |    |   |   |   |   |
|         |                        |                      |          |          | 4      | 7    | 5.8632     | 7.0000   |                                                                 |                         |    |    |   |   |   |   |

Show detected proteins only  
 Show all proteins  
 Filter by category:

Proteins found: 1344

Test Cutoff

| Signif | Direction | Applies To   |
|--------|-----------|--------------|
| yes    | +         | ratios, bars |
| no     | n/a       | bars         |
| yes    | -         | ratios, bars |
| yes    | +         | p-, q-Values |
| yes    | -         |              |

Fn Summary Table FnPg vs Fn FnSg vs Fn FnPgSg vs Fn FnPgSg vs FnPg FnSg vs FnPg FnPgSg vs FnSg Fn Coverage

| Protein | FnPgSg vs FnSg         |                      |          |          | Raw    |      | Normalized |           | Description                                                    | Log <sub>2</sub> Ratios |    |    |   |   |   |   |
|---------|------------------------|----------------------|----------|----------|--------|------|------------|-----------|----------------------------------------------------------------|-------------------------|----|----|---|---|---|---|
|         | Log <sub>2</sub> Ratio | Log <sub>2</sub> Sum | q-Value  | p-Value  | FnPgSg | FnSg | FnPgSg     | FnSg      |                                                                | -6                      | -4 | -2 | 0 | 2 | 4 | 6 |
| FN1152  | 0.622                  | 13.950               | 1.393e-3 | 2.945e-3 | 146    | 79   | 167.0309   | 102.8277  | AAL95348.1  Aspartate aminotransferase                         |                         |    |    |   |   |   |   |
|         |                        |                      |          |          | 99     | 100  | 145.1141   | 100.0000  |                                                                |                         |    |    |   |   |   |   |
| FN1153  |                        |                      |          |          | 37     |      | 42.3298    |           | AAL95349.1  Hypothetical protein                               |                         |    |    |   |   |   |   |
|         |                        |                      |          |          | 29     |      | 42.5082    |           |                                                                |                         |    |    |   |   |   |   |
| FN1154  |                        |                      |          |          |        | 8    |            | 10.4129   | AAL95350.1  Ribonuclease BN                                    |                         |    |    |   |   |   |   |
|         |                        |                      |          |          |        | 10   |            | 10.0000   |                                                                |                         |    |    |   |   |   |   |
| FN1155  |                        |                      |          |          |        | 3    |            | 3.9048    | AAL95351.1  Cell division protein ftsI                         |                         |    |    |   |   |   |   |
|         |                        |                      |          |          |        | 5    |            | 5.0000    |                                                                |                         |    |    |   |   |   |   |
| FN1156  |                        |                      |          |          |        | 10   |            | 13.0162   | AAL95352.1  Primosomal protein N'                              |                         |    |    |   |   |   |   |
|         |                        |                      |          |          |        | 5    |            | 5.0000    |                                                                |                         |    |    |   |   |   |   |
| FN1157  |                        |                      |          |          | 12     |      | 13.7286    |           | AAL95353.1  Polypeptide deformylase                            |                         |    |    |   |   |   |   |
|         |                        |                      |          |          | 16     |      | 23.4528    |           |                                                                |                         |    |    |   |   |   |   |
| FN1159  | -0.836                 | 14.052               | 1.714e-4 | 1.773e-4 | 77     | 137  | 88.0916    | 178.3215  | AAL95355.1  Fructose-1,6-bisphosphatase                        |                         |    |    |   |   |   |   |
|         |                        |                      |          |          | 73     | 170  | 107.0033   | 170.0000  |                                                                |                         |    |    |   |   |   |   |
| FN1160  | 0.352                  | 6.372                | 1.012e-2 | 3.554e-2 | 9      | 7    | 10.2964    | 9.1113    | AAL95356.1  SWF/SNF family helicase                            |                         |    |    |   |   |   |   |
|         |                        |                      |          |          | 7      | 7    | 10.2606    | 7.0000    |                                                                |                         |    |    |   |   |   |   |
| FN1161  | -0.403                 | 5.507                |          |          |        | 5    |            | 6.5081    | AAL95357.1  Glutamate racemase                                 |                         |    |    |   |   |   |   |
|         |                        |                      |          |          | 4      | 9    | 5.8632     | 9.0000    |                                                                |                         |    |    |   |   |   |   |
| FN1162  |                        |                      |          |          |        | 4    |            | 5.2065    | AAL95358.1  Hydroxyacylglutathione hydrolase                   |                         |    |    |   |   |   |   |
|         |                        |                      |          |          |        | 10   |            | 10.0000   |                                                                |                         |    |    |   |   |   |   |
| FN1163  | 0.927                  | 12.063               | 3.219e-3 | 8.388e-3 | 77     | 46   | 88.0916    | 59.8744   | AAL95359.1  Thioredoxin reductase                              |                         |    |    |   |   |   |   |
|         |                        |                      |          |          | 63     | 35   | 92.3453    | 35.0000   |                                                                |                         |    |    |   |   |   |   |
| FN1164  | -0.788                 | 6.536                |          |          |        | 11   |            | 14.3178   | AAL95360.1  Glucokinase                                        |                         |    |    |   |   |   |   |
|         |                        |                      |          |          | 5      | 11   | 7.3290     | 11.0000   |                                                                |                         |    |    |   |   |   |   |
| FN1165  | 0.568                  | 24.997               | 2.725e-3 | 6.819e-3 | 6372   | 4182 | 7289.8698  | 5443.3605 | AAL95361.1  D-galactose-binding protein                        |                         |    |    |   |   |   |   |
|         |                        |                      |          |          | 4643   | 4062 | 6805.7029  | 4062.0000 |                                                                |                         |    |    |   |   |   |   |
| FN1166  | -0.805                 | 14.946               | 1.643e-5 | 6.592e-6 | 112    | 178  | 128.1333   | 231.6877  | AAL95362.1  Galactoside transport ATP-binding protein mgIA     |                         |    |    |   |   |   |   |
|         |                        |                      |          |          | 96     | 238  | 140.7167   | 238.0000  |                                                                |                         |    |    |   |   |   |   |
| FN1167  | 1.102                  | 8.201                | 4.179e-3 | 1.182e-2 | 26     | 8    | 29.7452    | 10.4129   | AAL95363.1  Galactoside transport system permease protein mgIC |                         |    |    |   |   |   |   |
|         |                        |                      |          |          | 14     | 13   | 20.5212    | 13.0000   |                                                                |                         |    |    |   |   |   |   |
| FN1169  | -0.563                 | 16.637               | 1.318e-2 | 4.862e-2 | 217    | 245  | 248.2583   | 318.8961  | AAL95365.1  L-lactate dehydrogenase                            |                         |    |    |   |   |   |   |
|         |                        |                      |          |          | 189    | 457  | 277.0359   | 457.0000  |                                                                |                         |    |    |   |   |   |   |

Show detected proteins only  
 Show all proteins  
 Filter by category:

Proteins found:  
1344

Test Cutoff

| Signif | Direction | Applies To   |
|--------|-----------|--------------|
| yes    | +         | ratios, bars |
| no     | n/a       | bars         |
| yes    | -         | ratios, bars |
| yes    | +         | p-, q-Values |
| yes    | -         |              |

Fn Summary Table FnPg vs Fn FnSg vs Fn FnPgSg vs Fn FnPgSg vs FnPg FnSg vs FnPg FnPgSg vs FnSg Fn Coverage

| Protein | FnPgSg vs FnSg         |                      |          |          | Raw    |      | Normalized |           | Description                                      | Log <sub>2</sub> Ratios |    |    |   |   |   |   |
|---------|------------------------|----------------------|----------|----------|--------|------|------------|-----------|--------------------------------------------------|-------------------------|----|----|---|---|---|---|
|         | Log <sub>2</sub> Ratio | Log <sub>2</sub> Sum | q-Value  | p-Value  | FnPgSg | FnSg | FnPgSg     | FnSg      |                                                  | -6                      | -4 | -2 | 0 | 2 | 4 | 6 |
| FN1170  | -0.665                 | 24.970               | 2.019e-5 | 9.477e-6 | 3813   | 5624 | 4362.2526  | 7320.2915 | AAL95366.1  Pyruvate-flavodoxin oxidoreductase   |                         |    |    |   |   |   |   |
|         |                        |                      |          |          | 3237   | 7117 | 4744.7901  | 7117.0000 |                                                  |                         |    |    |   |   |   |   |
| FN1171  | -0.167                 | 19.664               | 3.173e-2 | 1.328e-1 | 767    | 673  | 877.4843   | 875.9879  | AAL95367.1  Acetate kinase                       |                         |    |    |   |   |   |   |
|         |                        |                      |          |          | 575    | 1055 | 842.8342   | 1055.0000 |                                                  |                         |    |    |   |   |   |   |
| FN1172  | 0.469                  | 18.661               | 7.401e-4 | 1.293e-3 | 704    | 397  | 805.4093   | 516.7418  | AAL95368.1  Phosphate acetyltransferase          |                         |    |    |   |   |   |   |
|         |                        |                      |          |          | 484    | 578  | 709.4465   | 578.0000  |                                                  |                         |    |    |   |   |   |   |
| FN1179  |                        |                      |          |          |        |      |            |           | AAL95375.1  ATP-dependent RNA helicase           |                         |    |    |   |   |   |   |
|         |                        |                      |          |          |        | 6    |            | 6.0000    |                                                  |                         |    |    |   |   |   |   |
| FN1180  |                        |                      |          |          |        |      |            |           | AAL95376.1  Hypothetical protein                 |                         |    |    |   |   |   |   |
|         |                        |                      |          |          |        | 7    |            | 7.0000    |                                                  |                         |    |    |   |   |   |   |
| FN1181  | 0.388                  | 12.335               | 1.265e-2 | 4.632e-2 | 81     | 42   | 92.6678    | 54.6679   | AAL95377.1  unknown                              |                         |    |    |   |   |   |   |
|         |                        |                      |          |          | 49     | 71   | 71.8241    | 71.0000   |                                                  |                         |    |    |   |   |   |   |
| FN1182  |                        |                      |          |          |        |      |            |           | AAL95378.1  Hypothetical protein                 |                         |    |    |   |   |   |   |
|         |                        |                      |          |          |        | 6    |            | 6.0000    |                                                  |                         |    |    |   |   |   |   |
| FN1183  | -1.245                 | 6.511                | 9.701e-3 | 3.377e-2 | 7      | 8    | 8.0083     | 10.4129   | AAL95379.1  Hypothetical cytosolic protein       |                         |    |    |   |   |   |   |
|         |                        |                      |          |          | 3      | 19   | 4.3974     | 19.0000   |                                                  |                         |    |    |   |   |   |   |
| FN1185  | 0.090                  | 10.073               | 7.936e-2 | 3.729e-1 | 31     | 22   | 35.4655    | 28.6356   | AAL95381.1  SIR2 family protein                  |                         |    |    |   |   |   |   |
|         |                        |                      |          |          | 22     | 35   | 32.2476    | 35.0000   |                                                  |                         |    |    |   |   |   |   |
| FN1186  | -3.890                 | 13.521               | 1.311e-5 | 4.501e-6 | 30     | 308  | 34.3214    | 400.8979  | AAL95382.1  Amidohydrolase                       |                         |    |    |   |   |   |   |
|         |                        |                      |          |          | 15     | 434  | 21.9870    | 434.0000  |                                                  |                         |    |    |   |   |   |   |
| FN1187  | -1.126                 | 11.721               | 1.251e-2 | 4.572e-2 | 38     | 85   | 43.4738    | 110.6374  | AAL95383.1  Amino acid-binding protein           |                         |    |    |   |   |   |   |
|         |                        |                      |          |          | 24     | 61   | 35.1792    | 61.0000   |                                                  |                         |    |    |   |   |   |   |
| FN1188  | -1.000                 | 12.418               | 2.38e-4  | 2.799e-4 | 53     | 87   | 60.6345    | 113.2406  | AAL95384.1  Hypothetical protein                 |                         |    |    |   |   |   |   |
|         |                        |                      |          |          | 30     | 96   | 43.9740    | 96.0000   |                                                  |                         |    |    |   |   |   |   |
| FN1189  | -0.244                 | 11.706               | 6.726e-2 | 3.104e-1 | 48     | 59   | 54.9143    | 76.7954   | AAL95385.1  Hypothetical protein                 |                         |    |    |   |   |   |   |
|         |                        |                      |          |          | 35     | 49   | 51.3030    | 49.0000   |                                                  |                         |    |    |   |   |   |   |
| FN1190  | -0.874                 | 13.976               | 1.307e-5 | 4.48e-6  | 87     | 135  | 99.5321    | 175.7182  | AAL95386.1  Probable cadmium-transporting ATPase |                         |    |    |   |   |   |   |
|         |                        |                      |          |          | 60     | 168  | 87.9479    | 168.0000  |                                                  |                         |    |    |   |   |   |   |
| FN1191  | -2.540                 | 11.001               | 3.237e-3 | 8.446e-3 | 20     | 104  | 22.8809    | 135.3681  | AAL95387.1  unknown                              |                         |    |    |   |   |   |   |
|         |                        |                      |          |          | 10     | 83   | 14.6580    | 83.0000   |                                                  |                         |    |    |   |   |   |   |
| FN1192  | 0.022                  | 18.859               | 1.68e-1  | 8.733e-1 | 642    | 451  | 734.4784   | 587.0291  | AAL95388.1  unknown                              |                         |    |    |   |   |   |   |
|         |                        |                      |          |          | 447    | 782  | 655.2120   | 782.0000  |                                                  |                         |    |    |   |   |   |   |

Show detected proteins only  
 Show all proteins  
 Filter by category:

Proteins found: 1344

Test Cutoff

| Signif | Direction | Applies To   |
|--------|-----------|--------------|
| yes    | +         | ratios, bars |
| no     | n/a       | bars         |
| yes    | -         | ratios, bars |
| yes    | +         | p-, q-Values |
| yes    | -         |              |

Fn Summary Table FnPg vs Fn FnSg vs Fn FnPgSg vs Fn FnPgSg vs FnPg FnSg vs FnPg FnPgSg vs FnSg Fn Coverage

| Protein | FnPgSg vs FnSg         |                      |          |          | Raw    |      | Normalized |          | Description                                      | Log <sub>2</sub> Ratios |    |    |   |   |   |   |
|---------|------------------------|----------------------|----------|----------|--------|------|------------|----------|--------------------------------------------------|-------------------------|----|----|---|---|---|---|
|         | Log <sub>2</sub> Ratio | Log <sub>2</sub> Sum | q-Value  | p-Value  | FnPgSg | FnSg | FnPgSg     | FnSg     |                                                  | -6                      | -4 | -2 | 0 | 2 | 4 | 6 |
| FN1198  | -1.312                 | 10.670               | 5.405e-5 | 3.859e-5 | 23     | 47   | 26.3131    | 61.1760  | AAL95394.1  Transporter                          |                         |    |    |   |   |   |   |
|         |                        |                      |          |          | 17     | 66   | 24.9186    | 66.0000  |                                                  |                         |    |    |   |   |   |   |
| FN1200  | -4.391                 | 11.975               | 5.214e-4 | 7.921e-4 | 5      | 253  | 5.7202     | 329.3090 | AAL95396.1  Hypothetical protein                 |                         |    |    |   |   |   |   |
|         |                        |                      |          |          | 15     | 252  | 21.9870    | 252.0000 |                                                  |                         |    |    |   |   |   |   |
| FN1201  |                        |                      |          |          |        |      |            |          | AAL95397.1  unknown                              |                         |    |    |   |   |   |   |
|         |                        |                      |          |          |        | 7    |            | 7.0000   |                                                  |                         |    |    |   |   |   |   |
| FN1202  | -0.662                 | 8.674                | 3.534e-2 | 1.502e-1 | 14     | 26   | 16.0167    | 33.8420  | AAL95398.1  NH(3)-dependent NAD(+) synthetase    |                         |    |    |   |   |   |   |
|         |                        |                      |          |          | 11     | 17   | 16.1238    | 17.0000  |                                                  |                         |    |    |   |   |   |   |
| FN1203  |                        |                      |          |          |        |      |            |          | AAL95399.1  GTP-binding protein                  |                         |    |    |   |   |   |   |
|         |                        |                      |          |          |        | 10   |            | 13.0162  |                                                  |                         |    |    |   |   |   |   |
| FN1204  |                        |                      |          |          |        |      |            |          | AAL95400.1  Methyltransferase                    |                         |    |    |   |   |   |   |
|         |                        |                      |          |          |        | 8    |            | 8.0000   |                                                  |                         |    |    |   |   |   |   |
| FN1205  | 0.378                  | 11.953               | 5.801e-2 | 2.633e-1 | 55     | 58   | 62.9226    | 75.4938  | AAL95401.1  Protease                             |                         |    |    |   |   |   |   |
|         |                        |                      |          |          | 55     | 35   | 80.6189    | 35.0000  |                                                  |                         |    |    |   |   |   |   |
| FN1208  | -1.571                 | 6.604                |          |          | 5      |      | 5.7202     |          | AAL95404.1  1-deoxyxylulose-5-phosphate synthase |                         |    |    |   |   |   |   |
|         |                        |                      |          |          |        | 17   |            | 17.0000  |                                                  |                         |    |    |   |   |   |   |
| FN1209  | 1.393                  | 10.365               | 1.062e-2 | 3.767e-2 | 67     | 16   | 76.6512    | 20.8259  | AAL95405.1  Hypothetical RNA binding protein     |                         |    |    |   |   |   |   |
|         |                        |                      |          |          | 28     | 24   | 41.0424    | 24.0000  |                                                  |                         |    |    |   |   |   |   |
| FN1210  | -0.214                 | 10.820               | 1.025e-1 | 4.939e-1 | 28     | 45   | 32.0333    | 58.5727  | AAL95406.1  Metal dependent hydrolase            |                         |    |    |   |   |   |   |
|         |                        |                      |          |          | 32     | 33   | 46.9056    | 33.0000  |                                                  |                         |    |    |   |   |   |   |
| FN1211  | 0.274                  | 7.827                | 1.073e-1 | 5.2e-1   | 20     | 8    | 22.8809    | 10.4129  | AAL95407.1  Cell division protein ftsI           |                         |    |    |   |   |   |   |
|         |                        |                      |          |          | 7      | 17   | 10.2606    | 17.0000  |                                                  |                         |    |    |   |   |   |   |
| FN1213  | -0.364                 | 11.542               | 5.795e-3 | 1.813e-2 | 47     | 46   | 53.7702    | 59.8744  | AAL95409.1  Hypothetical protein                 |                         |    |    |   |   |   |   |
|         |                        |                      |          |          | 29     | 64   | 42.5082    | 64.0000  |                                                  |                         |    |    |   |   |   |   |
| FN1214  |                        |                      |          |          | 6      |      | 6.8643     |          | AAL95410.1  Fe-S oxidoreductase                  |                         |    |    |   |   |   |   |
|         |                        |                      |          |          | 5      |      | 7.3290     |          |                                                  |                         |    |    |   |   |   |   |
| FN1216  | -1.162                 | 7.006                | 8.666e-3 | 2.956e-2 | 3      | 13   | 3.4321     | 16.9210  | AAL95412.1  RRF2 family protein                  |                         |    |    |   |   |   |   |
|         |                        |                      |          |          | 8      | 17   | 11.7264    | 17.0000  |                                                  |                         |    |    |   |   |   |   |
| FN1217  | -2.186                 | 6.863                | 7.813e-4 | 1.393e-3 | 5      | 20   | 5.7202     | 26.0323  | AAL95413.1  Holliday junction DNA helicase ruvB  |                         |    |    |   |   |   |   |
|         |                        |                      |          |          | 3      | 20   | 4.3974     | 20.0000  |                                                  |                         |    |    |   |   |   |   |
| FN1218  |                        |                      |          |          |        | 13   |            | 16.9210  | AAL95414.1  unknown                              |                         |    |    |   |   |   |   |
|         |                        |                      |          |          |        | 19   |            | 19.0000  |                                                  |                         |    |    |   |   |   |   |

Show detected proteins only  
 Show all proteins  
 Filter by category:

Proteins found:  
1344

Enter (or paste) list of ORFs

Find ORFs

Test Cutoff

q-Value .005

p-Value

| Signif | Direction | Applies To   |
|--------|-----------|--------------|
| yes    | +         | ratios, bars |
| no     | n/a       | bars         |
| yes    | -         | ratios, bars |
| yes    | +         | p-, q-Values |
| yes    | -         |              |

Dot Plots Dot Plots



Fn Summary Table FnPg vs Fn FnSg vs Fn FnPgSg vs Fn FnPgSg vs FnPg FnSg vs FnPg FnPgSg vs FnSg Fn Coverage

| Protein | FnPgSg vs FnSg         |                      |          |          | Raw    |      | Normalized |           | Description                                                                    | Log <sub>2</sub> Ratios |    |    |   |   |   |   |
|---------|------------------------|----------------------|----------|----------|--------|------|------------|-----------|--------------------------------------------------------------------------------|-------------------------|----|----|---|---|---|---|
|         | Log <sub>2</sub> Ratio | Log <sub>2</sub> Sum | q-Value  | p-Value  | FnPgSg | FnSg | FnPgSg     | FnSg      |                                                                                | -6                      | -4 | -2 | 0 | 2 | 4 | 6 |
| FN1219  | 0.347                  | 8.285                | 5.689e-2 | 2.576e-1 | 22     | 11   | 25.1690    | 14.3178   | AAL95415.1  Hypothetical protein                                               |                         |    |    |   |   |   |   |
|         |                        |                      |          |          | 10     | 17   | 14.6580    | 17.0000   |                                                                                |                         |    |    |   |   |   |   |
| FN1220  | -0.116                 | 15.794               | 1.186e-1 | 5.823e-1 | 212    | 150  | 242.5380   | 195.2425  | AAL95416.1  Cysteine synthase                                                  |                         |    |    |   |   |   |   |
|         |                        |                      |          |          | 147    | 301  | 215.4724   | 301.0000  |                                                                                |                         |    |    |   |   |   |   |
| FN1221  | -0.537                 | 9.201                | 2.795e-2 | 1.15e-1  | 16     | 28   | 18.3048    | 36.4453   | AAL95417.1  Hypothetical protein                                               |                         |    |    |   |   |   |   |
|         |                        |                      |          |          | 15     | 22   | 21.9870    | 22.0000   |                                                                                |                         |    |    |   |   |   |   |
| FN1222  | 1.553                  | 6.197                |          |          | 9      |      | 10.2964    |           | AAL95418.1  Hypothetical protein                                               |                         |    |    |   |   |   |   |
|         |                        |                      |          |          | 13     | 5    | 19.0554    | 5.0000    |                                                                                |                         |    |    |   |   |   |   |
| FN1223  | 1.749                  | 11.492               | 7.912e-6 | 1.933e-6 | 90     | 25   | 102.9643   | 32.5404   | AAL95419.1  Oxygen-insensitive NAD(P)H nitroreductase                          |                         |    |    |   |   |   |   |
|         |                        |                      |          |          | 64     | 26   | 93.8111    | 26.0000   |                                                                                |                         |    |    |   |   |   |   |
| FN1224  | 0.376                  | 12.987               | 2.757e-2 | 1.133e-1 | 100    | 47   | 114.4047   | 61.1760   | AAL95420.1  2-dehydro-3-deoxyphosphooctonate aldolase                          |                         |    |    |   |   |   |   |
|         |                        |                      |          |          | 62     | 97   | 90.8795    | 97.0000   |                                                                                |                         |    |    |   |   |   |   |
| FN1225  | 0.773                  | 13.837               | 6.241e-4 | 1.028e-3 | 147    | 60   | 168.1750   | 78.0970   | AAL95421.1  UDP-N-acetylmuramoyl-L-alanyl-D-glutamate--meso-lanthionine ligase |                         |    |    |   |   |   |   |
|         |                        |                      |          |          | 101    | 107  | 148.0457   | 107.0000  |                                                                                |                         |    |    |   |   |   |   |
| FN1226  | -1.139                 | 14.343               | 4.941e-3 | 1.48e-2  | 84     | 195  | 96.1000    | 253.8152  | AAL95422.1  Uracil-DNA glycosylase                                             |                         |    |    |   |   |   |   |
|         |                        |                      |          |          | 67     | 174  | 98.2085    | 174.0000  |                                                                                |                         |    |    |   |   |   |   |
| FN1230  |                        |                      |          |          | 62     |      | 70.9309    |           | AAL95426.1  Hypothetical cytosolic protein                                     |                         |    |    |   |   |   |   |
|         |                        |                      |          |          | 37     |      | 54.2345    |           |                                                                                |                         |    |    |   |   |   |   |
| FN1231  | -0.584                 | 19.529               | 3.977e-5 | 2.495e-5 | 592    | 788  | 677.2760   | 1025.6739 | AAL95427.1  Inosine-5'-monophosphate dehydrogenase                             |                         |    |    |   |   |   |   |
|         |                        |                      |          |          | 507    | 1104 | 743.1599   | 1104.0000 |                                                                                |                         |    |    |   |   |   |   |
| FN1233  |                        |                      |          |          |        |      |            |           | AAL95429.1  Putative NAD(P)H oxidoreductase                                    |                         |    |    |   |   |   |   |
|         |                        |                      |          |          |        | 6    |            | 6.0000    |                                                                                |                         |    |    |   |   |   |   |
| FN1234  | -1.350                 | 7.435                |          |          | 8      |      | 9.1524     |           | AAL95430.1  Hypothetical protein                                               |                         |    |    |   |   |   |   |
|         |                        |                      |          |          | 5      | 21   | 7.3290     | 21.0000   |                                                                                |                         |    |    |   |   |   |   |
| FN1235  | -1.215                 | 8.682                | 5.925e-3 | 1.866e-2 | 13     | 29   | 14.8726    | 37.7469   | AAL95431.1  Ankyrin repeat proteins                                            |                         |    |    |   |   |   |   |
|         |                        |                      |          |          | 8      | 24   | 11.7264    | 24.0000   |                                                                                |                         |    |    |   |   |   |   |
| FN1237  | -2.143                 | 11.997               | 3.259e-4 | 4.31e-4  | 25     | 112  | 28.6012    | 145.7811  | AAL95433.1  Choline kinase                                                     |                         |    |    |   |   |   |   |
|         |                        |                      |          |          | 22     | 123  | 32.2476    | 123.0000  |                                                                                |                         |    |    |   |   |   |   |
| FN1238  |                        |                      |          |          |        |      |            |           | AAL95434.1  Hypothetical protein                                               |                         |    |    |   |   |   |   |
|         |                        |                      |          |          |        | 4    |            | 4.0000    |                                                                                |                         |    |    |   |   |   |   |
| FN1240  | 0.515                  | 6.090                | 1.651e-2 | 6.312e-2 | 7      | 6    | 8.0083     | 7.8097    | AAL95436.1  Lipopolysaccharide core biosynthesis protein rfaY                  |                         |    |    |   |   |   |   |
|         |                        |                      |          |          | 8      | 6    | 11.7264    | 6.0000    |                                                                                |                         |    |    |   |   |   |   |

Show detected proteins only  
 Show all proteins  
 Filter by category:

Proteins found: 1344

Enter (or paste) list of ORFs

Find ORFs

Test Cutoff

q-Value p-Value

.005

| Signif | Direction | Applies To   |
|--------|-----------|--------------|
| yes    | +         | ratios, bars |
| no     | n/a       | bars         |
| yes    | -         | ratios, bars |
| yes    | +         | p-, q-Values |
| yes    | -         | p-, q-Values |

Dot Plots Dot Plots

Fn Summary Table FnPg vs Fn FnSg vs Fn FnPgSg vs Fn FnPgSg vs FnPg FnSg vs FnPg FnPgSg vs FnSg Fn Coverage

| Protein | FnPgSg vs FnSg         |                      |          |          | Raw    |      | Normalized |          | Description                                               | Log <sub>2</sub> Ratios |    |    |   |   |   |   |
|---------|------------------------|----------------------|----------|----------|--------|------|------------|----------|-----------------------------------------------------------|-------------------------|----|----|---|---|---|---|
|         | Log <sub>2</sub> Ratio | Log <sub>2</sub> Sum | q-Value  | p-Value  | FnPgSg | FnSg | FnPgSg     | FnSg     |                                                           | -6                      | -4 | -2 | 0 | 2 | 4 | 6 |
| FN1241  |                        |                      |          |          |        | 8    |            | 10.4129  | AAL95437.1  polysaccharide biosynthesis protein           |                         |    |    |   |   |   |   |
|         |                        |                      |          |          |        | 12   |            | 12.0000  |                                                           |                         |    |    |   |   |   |   |
| FN1242  | -2.040                 | 7.380                | 2.034e-5 | 9.613e-6 | 6      | 21   | 6.8643     | 27.3339  | AAL95438.1  Polysaccharide deacetylase                    |                         |    |    |   |   |   |   |
|         |                        |                      |          |          | 4      | 25   | 5.8632     | 25.0000  |                                                           |                         |    |    |   |   |   |   |
| FN1243  | -0.706                 | 6.584                | 4.124e-5 | 2.651e-5 | 7      | 10   | 8.0083     | 13.0162  | AAL95439.1  Glycosyl transferase                          |                         |    |    |   |   |   |   |
|         |                        |                      |          |          | 5      | 12   | 7.3290     | 12.0000  |                                                           |                         |    |    |   |   |   |   |
| FN1244  | -2.025                 | 7.437                | 1.644e-3 | 3.627e-3 | 5      | 17   | 5.7202     | 22.1275  | AAL95440.1  Polysaccharide deacetylase                    |                         |    |    |   |   |   |   |
|         |                        |                      |          |          | 5      | 31   | 7.3290     | 31.0000  |                                                           |                         |    |    |   |   |   |   |
| FN1245  |                        |                      |          |          |        | 6    |            | 7.8097   | AAL95441.1  Glycosyl transferase                          |                         |    |    |   |   |   |   |
|         |                        |                      |          |          |        | 7    |            | 7.0000   |                                                           |                         |    |    |   |   |   |   |
| FN1246  | -2.093                 | 6.366                |          |          |        | 15   |            | 19.5242  | AAL95442.1  Lipooligosaccharide cholinephosphotransferase |                         |    |    |   |   |   |   |
|         |                        |                      |          |          | 3      | 18   | 4.3974     | 18.0000  |                                                           |                         |    |    |   |   |   |   |
| FN1247  | -2.017                 | 8.189                | 4.351e-3 | 1.25e-2  | 11     | 19   | 12.5845    | 24.7307  | AAL95443.1  LOS biosynthesis enzyme LBGB                  |                         |    |    |   |   |   |   |
|         |                        |                      |          |          | 3      | 44   | 4.3974     | 44.0000  |                                                           |                         |    |    |   |   |   |   |
| FN1250  | 0.308                  | 9.122                | 3.567e-2 | 1.518e-1 | 19     | 18   | 21.7369    | 23.4291  | AAL95446.1  Guanine-hypoxanthine permease                 |                         |    |    |   |   |   |   |
|         |                        |                      |          |          | 21     | 19   | 30.7818    | 19.0000  |                                                           |                         |    |    |   |   |   |   |
| FN1251  | -0.152                 | 6.757                | 1.525e-1 | 7.785e-1 | 7      | 13   | 8.0083     | 16.9210  | AAL95447.1  High-affinity iron permease                   |                         |    |    |   |   |   |   |
|         |                        |                      |          |          | 8      | 5    | 11.7264    | 5.0000   |                                                           |                         |    |    |   |   |   |   |
| FN1252  | 0.785                  | 18.058               | 1.531e-3 | 3.314e-3 | 667    | 361  | 763.0796   | 469.8836 | AAL95448.1  34 kDa membrane antigen precursor             |                         |    |    |   |   |   |   |
|         |                        |                      |          |          | 415    | 326  | 608.3064   | 326.0000 |                                                           |                         |    |    |   |   |   |   |
| FN1253  | 0.452                  | 16.068               | 4.431e-3 | 1.282e-2 | 240    | 186  | 274.5714   | 242.1007 | AAL95449.1  unknown                                       |                         |    |    |   |   |   |   |
|         |                        |                      |          |          | 231    | 206  | 338.5995   | 206.0000 |                                                           |                         |    |    |   |   |   |   |
| FN1254  | 1.056                  | 12.894               | 2.61e-4  | 3.21e-4  | 120    | 53   | 137.2857   | 68.9857  | AAL95450.1  Oxygen-insensitive NAD(P)H nitroreductase     |                         |    |    |   |   |   |   |
|         |                        |                      |          |          | 78     | 52   | 114.3323   | 52.0000  |                                                           |                         |    |    |   |   |   |   |
| FN1256  |                        |                      |          |          |        |      |            |          | AAL95452.1  C4-dicarboxylate transporter large subunit    |                         |    |    |   |   |   |   |
|         |                        |                      |          |          | 3      |      | 4.3974     |          |                                                           |                         |    |    |   |   |   |   |
| FN1258  | 0.294                  | 19.935               | 2.606e-3 | 6.457e-3 | 987    | 741  | 1129.1747  | 964.4979 | AAL95454.1  C4-dicarboxylate-binding protein              |                         |    |    |   |   |   |   |
|         |                        |                      |          |          | 742    | 844  | 1087.6226  | 844.0000 |                                                           |                         |    |    |   |   |   |   |
| FN1259  |                        |                      |          |          |        |      |            |          | AAL95455.1  hypothetical protein                          |                         |    |    |   |   |   |   |
|         |                        |                      |          |          |        | 9    |            | 9.0000   |                                                           |                         |    |    |   |   |   |   |
| FN1260  |                        |                      |          |          | 3      |      | 3.4321     |          | AAL95456.1  Sensory Transduction Protein Kinase           |                         |    |    |   |   |   |   |
|         |                        |                      |          |          |        |      |            |          |                                                           |                         |    |    |   |   |   |   |

Show detected proteins only  
 Show all proteins  
 Filter by category:

Proteins found:  
1344

Enter (or paste) list of ORFs

Find ORFs

Test Cutoff

q-Value

p-Value

.005

| Signif | Direction | Applies To   |
|--------|-----------|--------------|
| yes    | +         | ratios, bars |
| no     | n/a       | bars         |
| yes    | -         | ratios, bars |
| yes    | +         | p-, q-Values |
| yes    | -         | p-, q-Values |

Dot Plots  Dot Plots

Fn Summary Table FnPg vs Fn FnSg vs Fn FnPgSg vs Fn FnPgSg vs FnPg FnSg vs FnPg FnPgSg vs FnSg Fn Coverage

| Protein | FnPgSg vs FnSg         |                      |          |          | Raw    |      | Normalized |          | Description                                              | Log <sub>2</sub> Ratios |    |    |   |   |   |   |
|---------|------------------------|----------------------|----------|----------|--------|------|------------|----------|----------------------------------------------------------|-------------------------|----|----|---|---|---|---|
|         | Log <sub>2</sub> Ratio | Log <sub>2</sub> Sum | q-Value  | p-Value  | FnPgSg | FnSg | FnPgSg     | FnSg     |                                                          | -6                      | -4 | -2 | 0 | 2 | 4 | 6 |
| FN1262  |                        |                      |          |          |        | 21   |            | 27.3339  | AAL95458.1  Integral membrane protein                    |                         |    |    |   |   |   |   |
|         |                        |                      |          |          |        | 7    |            | 7.0000   |                                                          |                         |    |    |   |   |   |   |
| FN1263  | -0.396                 | 8.634                | 4.722e-3 | 1.395e-2 | 15     | 19   | 17.1607    | 24.7307  | AAL95459.1  Cobalt chelatase                             |                         |    |    |   |   |   |   |
|         |                        |                      |          |          | 12     | 21   | 17.5896    | 21.0000  |                                                          |                         |    |    |   |   |   |   |
| FN1264  | -0.424                 | 7.631                | 2.497e-4 | 3.004e-4 | 11     | 12   | 12.5845    | 15.6194  | AAL95460.1  Hypothetical protein                         |                         |    |    |   |   |   |   |
|         |                        |                      |          |          | 8      | 17   | 11.7264    | 17.0000  |                                                          |                         |    |    |   |   |   |   |
| FN1265  | -0.294                 | 12.574               | 4.543e-2 | 2e-1     | 49     | 76   | 56.0583    | 98.9229  | AAL95461.1  Outer membrane protein                       |                         |    |    |   |   |   |   |
|         |                        |                      |          |          | 58     | 74   | 85.0163    | 74.0000  |                                                          |                         |    |    |   |   |   |   |
| FN1266  | 0.165                  | 13.765               | 6.992e-2 | 3.243e-1 | 98     | 99   | 112.1166   | 128.8600 | AAL95462.1  UTP--glucose-1-phosphate uridylyltransferase |                         |    |    |   |   |   |   |
|         |                        |                      |          |          | 94     | 94   | 137.7851   | 94.0000  |                                                          |                         |    |    |   |   |   |   |
| FN1267  | 0.005                  | 10.122               | 1.85e-1  | 9.817e-1 | 29     | 32   | 33.1774    | 41.6517  | AAL95463.1  Hypothetical protein                         |                         |    |    |   |   |   |   |
|         |                        |                      |          |          | 23     | 25   | 33.7134    | 25.0000  |                                                          |                         |    |    |   |   |   |   |
| FN1268  | 0.461                  | 14.901               | 1.65e-4  | 1.688e-4 | 187    | 120  | 213.9369   | 156.1940 | AAL95464.1  Methionyl-tRNA synthetase                    |                         |    |    |   |   |   |   |
|         |                        |                      |          |          | 134    | 142  | 196.4170   | 142.0000 |                                                          |                         |    |    |   |   |   |   |
| FN1269  | -1.051                 | 5.324                |          |          |        | 7    |            | 9.1113   | AAL95465.1  Hypothetical lipoprotein                     |                         |    |    |   |   |   |   |
|         |                        |                      |          |          | 3      |      | 4.3974     |          |                                                          |                         |    |    |   |   |   |   |
| FN1270  | 4.116                  | 11.216               |          |          | 177    | 9    | 202.4964   | 11.7145  | AAL95466.1  Hypothetical cytosolic protein               |                         |    |    |   |   |   |   |
|         |                        |                      |          |          | 139    |      | 203.7460   |          |                                                          |                         |    |    |   |   |   |   |
| FN1271  | -0.039                 | 11.411               | 1.637e-1 | 8.465e-1 | 49     | 49   | 56.0583    | 63.7792  | AAL95467.1  Protease IV                                  |                         |    |    |   |   |   |   |
|         |                        |                      |          |          | 32     | 42   | 46.9056    | 42.0000  |                                                          |                         |    |    |   |   |   |   |
| FN1273  | -1.894                 | 10.159               | 3.127e-7 | 2.423e-8 | 14     | 51   | 16.0167    | 66.3824  | AAL95469.1  Outer membrane protein toIC                  |                         |    |    |   |   |   |   |
|         |                        |                      |          |          | 13     | 64   | 19.0554    | 64.0000  |                                                          |                         |    |    |   |   |   |   |
| FN1274  | -0.494                 | 8.478                | 8.989e-4 | 1.686e-3 | 15     | 16   | 17.1607    | 20.8259  | AAL95470.1  Acriflavin resistance protein E              |                         |    |    |   |   |   |   |
|         |                        |                      |          |          | 10     | 24   | 14.6580    | 24.0000  |                                                          |                         |    |    |   |   |   |   |
| FN1275  | 0.273                  | 9.113                | 3.324e-2 | 1.4e-1   | 26     | 16   | 29.7452    | 20.8259  | AAL95471.1  Acriflavin resistance protein B              |                         |    |    |   |   |   |   |
|         |                        |                      |          |          | 15     | 22   | 21.9870    | 22.0000  |                                                          |                         |    |    |   |   |   |   |
| FN1276  | -1.184                 | 7.380                | 7.721e-4 | 1.37e-3  | 6      | 13   | 6.8643     | 16.9210  | AAL95472.1  Hypothetical protein                         |                         |    |    |   |   |   |   |
|         |                        |                      |          |          | 7      | 22   | 10.2606    | 22.0000  |                                                          |                         |    |    |   |   |   |   |
| FN1277  | -0.195                 | 15.440               | 1.632e-2 | 6.224e-2 | 169    | 160  | 193.3440   | 208.2587 | AAL95473.1  Aminoacyl-histidine dipeptidase              |                         |    |    |   |   |   |   |
|         |                        |                      |          |          | 137    | 243  | 200.8144   | 243.0000 |                                                          |                         |    |    |   |   |   |   |
| FN1278  | 0.262                  | 7.181                |          |          |        |      |            |          | AAL95474.1  Acetyltransferase                            |                         |    |    |   |   |   |   |
|         |                        |                      |          |          | 9      | 11   | 13.1922    | 11.0000  |                                                          |                         |    |    |   |   |   |   |

- Show detected proteins only
- Show all proteins

Filter by category:  
GO: amino acid transport

Proteins found:  
1344

Enter (or paste) list of ORFs

Find ORFs

Test Cutoff

q-Value

p-Value

.005

| Signif | Direction | Applies To   |
|--------|-----------|--------------|
| yes    | +         | ratios, bars |
| no     | n/a       | bars         |
| yes    | -         | ratios, bars |
| yes    | +         | p-, q-Values |
| yes    | -         |              |

Dot Plots Dot Plots

Fn Summary Table FnPg vs Fn FnSg vs Fn FnPgSg vs Fn FnPgSg vs FnPg FnSg vs FnPg FnPgSg vs FnSg Fn Coverage

| Protein | FnPgSg vs FnSg         |                      |          |          | Raw    |      | Normalized |          | Description                                                          | Log <sub>2</sub> Ratios |    |    |   |   |   |   |
|---------|------------------------|----------------------|----------|----------|--------|------|------------|----------|----------------------------------------------------------------------|-------------------------|----|----|---|---|---|---|
|         | Log <sub>2</sub> Ratio | Log <sub>2</sub> Sum | q-Value  | p-Value  | FnPgSg | FnSg | FnPgSg     | FnSg     |                                                                      | -6                      | -4 | -2 | 0 | 2 | 4 | 6 |
| FN1279  | 0.154                  | 11.326               | 2.489e-2 | 1.01e-1  | 46     | 40   | 52.6262    | 52.0647  | AAL95475.1  Zinc metallohydrolase, glyoxalase II family              |                         |    |    |   |   |   |   |
|         |                        |                      |          |          | 37     | 44   | 54.2345    | 44.0000  |                                                                      |                         |    |    |   |   |   |   |
| FN1280  | -2.752                 | 10.660               | 5.523e-4 | 8.591e-4 | 13     | 89   | 14.8726    | 115.8439 | AAL95476.1  Serine protease, V8 family                               |                         |    |    |   |   |   |   |
|         |                        |                      |          |          | 11     | 93   | 16.1238    | 93.0000  |                                                                      |                         |    |    |   |   |   |   |
| FN1281  |                        |                      |          |          |        | 27   |            | 35.1436  | AAL95477.1  Cysteine protease                                        |                         |    |    |   |   |   |   |
|         |                        |                      |          |          |        | 35   |            | 35.0000  |                                                                      |                         |    |    |   |   |   |   |
| FN1282  | 0.455                  | 13.042               | 1.408e-3 | 2.984e-3 | 97     | 66   | 110.9726   | 85.9067  | AAL95478.1  LSU ribosomal protein L17P                               |                         |    |    |   |   |   |   |
|         |                        |                      |          |          | 71     | 71   | 104.0717   | 71.0000  |                                                                      |                         |    |    |   |   |   |   |
| FN1283  | 0.759                  | 19.378               | 2.37e-3  | 5.732e-3 | 947    | 404  | 1083.4129  | 525.8531 | AAL95479.1  DNA-directed RNA polymerase alpha chain                  |                         |    |    |   |   |   |   |
|         |                        |                      |          |          | 726    | 743  | 1064.1698  | 743.0000 |                                                                      |                         |    |    |   |   |   |   |
| FN1284  | 0.852                  | 18.160               | 1.686e-5 | 6.882e-6 | 628    | 324  | 718.4617   | 421.7238 | AAL95480.1  SSU ribosomal protein S4P                                |                         |    |    |   |   |   |   |
|         |                        |                      |          |          | 502    | 384  | 735.8309   | 384.0000 |                                                                      |                         |    |    |   |   |   |   |
| FN1285  | 2.590                  | 11.582               | 1.366e-4 | 1.301e-4 | 112    | 17   | 128.1333   | 22.1275  | AAL95481.1  SSU ribosomal protein S11P                               |                         |    |    |   |   |   |   |
|         |                        |                      |          |          | 98     | 23   | 143.6483   | 23.0000  |                                                                      |                         |    |    |   |   |   |   |
| FN1286  | 0.259                  | 13.472               | 4.274e-2 | 1.867e-1 | 118    | 66   | 134.9976   | 85.9067  | AAL95482.1  SSU ribosomal protein S13P                               |                         |    |    |   |   |   |   |
|         |                        |                      |          |          | 67     | 109  | 98.2085    | 109.0000 |                                                                      |                         |    |    |   |   |   |   |
| FN1287  | -0.169                 | 6.448                | 1.021e-1 | 4.92e-1  | 9      | 6    | 10.2964    | 7.8097   | AAL95483.1  Bacterial Protein Translation Initiation Factor 1 (IF-1) |                         |    |    |   |   |   |   |
|         |                        |                      |          |          | 5      | 12   | 7.3290     | 12.0000  |                                                                      |                         |    |    |   |   |   |   |
| FN1290  | -0.547                 | 7.552                | 4.987e-2 | 2.222e-1 | 7      | 17   | 8.0083     | 22.1275  | AAL95486.1  Hypothetical protein                                     |                         |    |    |   |   |   |   |
|         |                        |                      |          |          | 10     | 11   | 14.6580    | 11.0000  |                                                                      |                         |    |    |   |   |   |   |
| FN1293  | 0.171                  | 4.932                |          |          |        | 4    |            | 5.2065   | AAL95489.1  Hypothetical protein                                     |                         |    |    |   |   |   |   |
|         |                        |                      |          |          |        | 4    | 5.8632     |          |                                                                      |                         |    |    |   |   |   |   |
| FN1296  |                        |                      |          |          | 10     |      | 11.4405    |          | AAL95492.1  unknown                                                  |                         |    |    |   |   |   |   |
|         |                        |                      |          |          | 6      |      | 8.7948     |          |                                                                      |                         |    |    |   |   |   |   |
| FN1297  | 0.712                  | 10.659               | 2.065e-3 | 4.807e-3 | 40     | 26   | 45.7619    | 33.8420  | AAL95493.1  Methionine aminopeptidase                                |                         |    |    |   |   |   |   |
|         |                        |                      |          |          | 39     | 29   | 57.1661    | 29.0000  |                                                                      |                         |    |    |   |   |   |   |
| FN1298  | 0.982                  | 12.121               | 1.02e-2  | 3.586e-2 | 64     | 53   | 73.2190    | 68.9857  | AAL95494.1  Adenylate kinase                                         |                         |    |    |   |   |   |   |
|         |                        |                      |          |          | 78     | 26   | 114.3323   | 26.0000  |                                                                      |                         |    |    |   |   |   |   |
| FN1299  |                        |                      |          |          |        | 4    |            | 5.2065   | AAL95495.1  dTDP-glucose 4,6-dehydratase                             |                         |    |    |   |   |   |   |
|         |                        |                      |          |          |        | 7    |            | 7.0000   |                                                                      |                         |    |    |   |   |   |   |
| FN1301  | 0.846                  | 12.124               | 3.104e-4 | 4.039e-4 | 72     | 42   | 82.3714    | 54.6679  | AAL95497.1  ABC transporter ATP-binding protein                      |                         |    |    |   |   |   |   |
|         |                        |                      |          |          | 66     | 45   | 96.7427    | 45.0000  |                                                                      |                         |    |    |   |   |   |   |

Show detected proteins only  
 Show all proteins  
 Filter by category:

Proteins found: 1344

Test Cutoff

| Signif | Direction | Applies To   |
|--------|-----------|--------------|
| yes    | +         | ratios, bars |
| no     | n/a       | bars         |
| yes    | -         | ratios, bars |
| yes    | +         | p-, q-Values |
| yes    | -         |              |

Fn Summary Table FnPg vs Fn FnSg vs Fn FnPgSg vs Fn FnPgSg vs FnPg FnSg vs FnPg FnPgSg vs FnSg Fn Coverage

| Protein | FnPgSg vs FnSg         |                      |          |          | Raw    |      | Normalized |           | Description                                                 | Log <sub>2</sub> Ratios |    |    |   |   |
|---------|------------------------|----------------------|----------|----------|--------|------|------------|-----------|-------------------------------------------------------------|-------------------------|----|----|---|---|
|         | Log <sub>2</sub> Ratio | Log <sub>2</sub> Sum | q-Value  | p-Value  | FnPgSg | FnSg | FnPgSg     | FnSg      |                                                             | -6                      | -4 | -2 | 0 | 2 |
| FN1302  | 2.453                  | 15.969               | 4.184e-4 | 5.898e-4 | 566    | 81   | 647.5308   | 105.4309  | AAL95498.1  Hypothetical protein                            |                         |    |    |   |   |
|         |                        |                      |          |          | 367    | 111  | 537.9481   | 111.0000  |                                                             |                         |    |    |   |   |
| FN1303  | 0.035                  | 12.114               | 1.474e-1 | 7.479e-1 | 64     | 55   | 73.2190    | 71.5889   | AAL95499.1  hypothetical cytosolic protein                  |                         |    |    |   |   |
|         |                        |                      |          |          | 42     | 60   | 61.5635    | 60.0000   |                                                             |                         |    |    |   |   |
| FN1304  | 0.391                  | 14.171               | 1.726e-3 | 3.858e-3 | 145    | 87   | 165.8869   | 113.2406  | AAL95500.1  Single-strand DNA binding protein               |                         |    |    |   |   |
|         |                        |                      |          |          | 99     | 124  | 145.1141   | 124.0000  |                                                             |                         |    |    |   |   |
| FN1305  | -0.427                 | 10.319               | 8.954e-2 | 4.254e-1 | 18     | 46   | 20.5929    | 59.8744   | AAL95501.1  Hypothetical cytosolic protein                  |                         |    |    |   |   |
|         |                        |                      |          |          | 28     | 23   | 41.0424    | 23.0000   |                                                             |                         |    |    |   |   |
| FN1306  | -2.726                 | 12.610               | 7.839e-4 | 1.4e-3   | 23     | 135  | 26.3131    | 175.7182  | AAL95502.1  Methyltransferase                               |                         |    |    |   |   |
|         |                        |                      |          |          | 24     | 231  | 35.1792    | 231.0000  |                                                             |                         |    |    |   |   |
| FN1309  | 1.479                  | 15.699               | 4.567e-5 | 3.076e-5 | 312    | 87   | 356.9428   | 113.2406  | AAL95505.1  Hypothetical protein                            |                         |    |    |   |   |
|         |                        |                      |          |          | 282    | 163  | 413.3552   | 163.0000  |                                                             |                         |    |    |   |   |
| FN1313  | 0.157                  | 12.363               | 1.121e-1 | 5.463e-1 | 84     | 58   | 96.1000    | 75.4938   | AAL95509.1  Oligopeptide-binding protein oppA               |                         |    |    |   |   |
|         |                        |                      |          |          | 39     | 62   | 57.1661    | 62.0000   |                                                             |                         |    |    |   |   |
| FN1315  |                        |                      |          |          |        | 6    |            | 7.8097    | AAL95511.1  Hypothetical protein                            |                         |    |    |   |   |
|         |                        |                      |          |          |        |      |            |           |                                                             |                         |    |    |   |   |
| FN1317  |                        |                      |          |          |        | 8    |            | 10.4129   | AAL95513.1  RNA polymerase sigma factor                     |                         |    |    |   |   |
|         |                        |                      |          |          |        |      |            |           |                                                             |                         |    |    |   |   |
| FN1318  | 0.683                  | 9.707                | 7.783e-3 | 2.606e-2 | 32     | 22   | 36.6095    | 28.6356   | AAL95514.1  RNA polymerase sigma factor rpoD                |                         |    |    |   |   |
|         |                        |                      |          |          | 25     | 17   | 36.6450    | 17.0000   |                                                             |                         |    |    |   |   |
| FN1319  | -1.487                 | 7.683                | 2.276e-2 | 9.15e-2  | 6      | 10   | 6.8643     | 13.0162   | AAL95515.1  DNA primase                                     |                         |    |    |   |   |
|         |                        |                      |          |          | 7      | 35   | 10.2606    | 35.0000   |                                                             |                         |    |    |   |   |
| FN1320  | 0.526                  | 15.632               | 7.282e-3 | 2.398e-2 | 205    | 168  | 234.5297   | 218.6716  | AAL95516.1  Peptidyl-prolyl cis-trans isomerase             |                         |    |    |   |   |
|         |                        |                      |          |          | 209    | 157  | 306.3519   | 157.0000  |                                                             |                         |    |    |   |   |
| FN1321  | -0.279                 | 20.089               | 2.344e-2 | 9.448e-2 | 969    | 849  | 1108.5819  | 1105.0725 | AAL95517.1  Acetoacetate metabolism regulatory protein atoC |                         |    |    |   |   |
|         |                        |                      |          |          | 552    | 1221 | 809.1208   | 1221.0000 |                                                             |                         |    |    |   |   |
| FN1322  | -1.832                 | 6.864                |          |          | 5      | 19   | 5.7202     | 24.7307   | AAL95518.1  Membrane metalloprotease                        |                         |    |    |   |   |
|         |                        |                      |          |          |        | 16   |            | 16.0000   |                                                             |                         |    |    |   |   |
| FN1323  | 0.328                  | 6.105                | 5.967e-2 | 2.716e-1 | 6      | 6    | 6.8643     | 7.8097    | AAL95519.1  Thymidylate kinase                              |                         |    |    |   |   |
|         |                        |                      |          |          | 8      | 7    | 11.7264    | 7.0000    |                                                             |                         |    |    |   |   |
| FN1324  | -1.111                 | 10.021               | 8.493e-4 | 1.568e-3 | 14     | 39   | 16.0167    | 50.7630   | AAL95520.1  1-deoxy-D-xylulose 5-phosphate reductoisomerase |                         |    |    |   |   |
|         |                        |                      |          |          | 19     | 44   | 27.8502    | 44.0000   |                                                             |                         |    |    |   |   |

Show detected proteins only  
 Show all proteins  
 Filter by category:

Proteins found:  
1344

Test Cutoff

| Signif | Direction | Applies To   |
|--------|-----------|--------------|
| yes    | +         | ratios, bars |
| no     | n/a       | bars         |
| yes    | -         | ratios, bars |
| yes    | +         | p-, q-Values |
| yes    | -         | p-, q-Values |

Fn Summary Table FnPg vs Fn FnSg vs Fn FnPgSg vs Fn FnPgSg vs FnPg FnSg vs FnPg FnPgSg vs FnSg Fn Coverage

| Protein       | FnPgSg vs FnSg         |                      |          |          | Raw    |      | Normalized |          | Description                                                        | Log <sub>2</sub> Ratios |    |    |   |   |   |   |
|---------------|------------------------|----------------------|----------|----------|--------|------|------------|----------|--------------------------------------------------------------------|-------------------------|----|----|---|---|---|---|
|               | Log <sub>2</sub> Ratio | Log <sub>2</sub> Sum | q-Value  | p-Value  | FnPgSg | FnSg | FnPgSg     | FnSg     |                                                                    | -6                      | -4 | -2 | 0 | 2 | 4 | 6 |
| <b>FN1326</b> | 0.552                  | 6.166                |          |          | 7      | 7    | 10.2606    | 7.0000   | AAL95522.1  Undecaprenyl pyrophosphate synthetase                  |                         |    |    |   |   |   |   |
| <b>FN1327</b> | -0.820                 | 7.208                |          |          | 8      | 11   | 9.1524     | 14.3178  | AAL95523.1  Dimethylallyltransferase                               |                         |    |    |   |   |   |   |
| <b>FN1328</b> |                        |                      |          |          | 4      |      | 4.5762     |          | AAL95524.1  Exodeoxyribonuclease VII small subunit                 |                         |    |    |   |   |   |   |
| <b>FN1330</b> |                        |                      |          |          |        |      |            |          | AAL95526.1  S-adenosylmethionine:tRNA ribosyltransferase-isomerase |                         |    |    |   |   |   |   |
| <b>FN1331</b> |                        |                      |          |          | 14     |      | 16.0167    |          | AAL95527.1  Methyltransferase                                      |                         |    |    |   |   |   |   |
| <b>FN1332</b> | 0.896                  | 10.911               | 6.166e-4 | 1.009e-3 | 47     | 21   | 53.7702    | 27.3339  | AAL95528.1  Bacterial Peptide Chain Release Factor 1 (RF-1)        |                         |    |    |   |   |   |   |
| <b>FN1333</b> |                        |                      |          |          |        | 7    |            | 9.1113   | AAL95529.1  Hypothetical protein                                   |                         |    |    |   |   |   |   |
| <b>FN1334</b> | 1.170                  | 6.389                |          |          | 12     | 4    | 13.7286    | 5.2065   | AAL95530.1  N-acetylmuramoyl-L-alanine amidase                     |                         |    |    |   |   |   |   |
| <b>FN1335</b> | 2.490                  | 13.519               | 1.696e-3 | 3.778e-3 | 176    | 18   | 201.3523   | 23.4291  | AAL95531.1  Protein translocase subunit YajC                       |                         |    |    |   |   |   |   |
| <b>FN1336</b> |                        |                      |          |          |        |      |            |          | AAL95532.1  Hypothetical protein                                   |                         |    |    |   |   |   |   |
| <b>FN1337</b> | -0.028                 | 5.586                |          |          | 6      |      | 6.8643     |          | AAL95533.1  unknown                                                |                         |    |    |   |   |   |   |
| <b>FN1340</b> | 0.751                  | 16.700               | 6.195e-4 | 1.016e-3 | 403    | 173  | 461.0511   | 225.1797 | AAL95536.1  Glutamyl-tRNA synthetase                               |                         |    |    |   |   |   |   |
| <b>FN1341</b> | 0.869                  | 7.842                | 9.887e-3 | 3.455e-2 | 14     | 8    | 16.0167    | 10.4129  | AAL95537.1  Bacterial Peptide Chain Release Factor 2 (RF-2)        |                         |    |    |   |   |   |   |
| <b>FN1343</b> |                        |                      |          |          |        |      |            |          | AAL95539.1  seC-independent protein TATD                           |                         |    |    |   |   |   |   |
| <b>FN1345</b> |                        |                      |          |          |        |      |            |          | AAL95541.1  2-hydroxy-6-oxo-6-phenylhexa-2,4-dienoate hydrolase    |                         |    |    |   |   |   |   |
| <b>FN1346</b> |                        |                      |          |          |        |      |            |          | AAL95542.1  Hypothetical cytosolic protein                         |                         |    |    |   |   |   |   |

Show detected proteins only  
 Show all proteins  
 Filter by category:  
 GO: amino acid transport

Proteins found:  
 1344

Enter (or paste) list of ORFs

| Test    | Cutoff |
|---------|--------|
| q-Value | .005   |
| p-Value |        |

| Signif | Direction | Applies To   |
|--------|-----------|--------------|
| yes    | +         | ratios, bars |
| no     | n/a       | bars         |
| yes    | -         | ratios, bars |
| yes    | +         | p-, q-Values |
| yes    | -         | p-, q-Values |

Fn Summary Table

FnPg vs Fn

FnSg vs Fn

FnPgSg vs Fn

FnPgSg vs FnPg

FnSg vs FnPg

FnPgSg vs FnSg

Fn Coverage

| Protein | FnPgSg vs FnSg         |                      |          |          | Raw    |      | Normalized |          | Description                                              | Log <sub>2</sub> Ratios |    |    |   |   |   |   |
|---------|------------------------|----------------------|----------|----------|--------|------|------------|----------|----------------------------------------------------------|-------------------------|----|----|---|---|---|---|
|         | Log <sub>2</sub> Ratio | Log <sub>2</sub> Sum | q-Value  | p-Value  | FnPgSg | FnSg | FnPgSg     | FnSg     |                                                          | -6                      | -4 | -2 | 0 | 2 | 4 | 6 |
| FN1347  | 0.867                  | 6.378                | 5.785e-4 | 9.184e-4 | 10     | 5    | 11.4405    | 6.5081   | AAL95543.1  Hypothetical cytosolic protein               |                         |    |    |   |   |   |   |
|         |                        |                      |          |          | 9      | 7    | 13.1922    | 7.0000   |                                                          |                         |    |    |   |   |   |   |
| FN1348  | -0.574                 | 9.468                | 7.142e-2 | 3.322e-1 | 33     | 23   | 37.7536    | 29.9372  | AAL95544.1  ABC transporter ATP-binding protein          |                         |    |    |   |   |   |   |
|         |                        |                      |          |          | 4      | 35   | 5.8632     | 35.0000  |                                                          |                         |    |    |   |   |   |   |
| FN1349  | -0.062                 | 6.451                |          |          | 8      | 7    | 9.1524     | 9.1113   | AAL95545.1  ABC transporter permease protein             |                         |    |    |   |   |   |   |
|         |                        |                      |          |          |        | 10   |            | 10.0000  |                                                          |                         |    |    |   |   |   |   |
| FN1351  | -0.670                 | 10.134               | 7.207e-3 | 2.367e-2 | 17     | 35   | 19.4488    | 45.5566  | AAL95547.1  15 kDa lipoprotein precursor                 |                         |    |    |   |   |   |   |
|         |                        |                      |          |          |        | 23   | 39         | 33.7134  |                                                          | 39.0000                 |    |    |   |   |   |   |
| FN1352  | 0.283                  | 11.727               | 1.938e-2 | 7.597e-2 | 61     | 35   | 69.7869    | 45.5566  | AAL95548.1  ABC transporter ATP-binding protein          |                         |    |    |   |   |   |   |
|         |                        |                      |          |          |        | 40   | 60         | 58.6319  |                                                          | 60.0000                 |    |    |   |   |   |   |
| FN1353  | -0.371                 | 7.316                | 5.968e-2 | 2.716e-1 | 13     | 9    | 14.8726    | 11.7145  | AAL95549.1  ABC transporter permease protein             |                         |    |    |   |   |   |   |
|         |                        |                      |          |          |        | 5    | 17         | 7.3290   |                                                          | 17.0000                 |    |    |   |   |   |   |
| FN1354  | 0.188                  | 9.115                | 7.149e-2 | 3.325e-1 | 26     | 17   | 29.7452    | 22.1275  | AAL95550.1  ABC transporter permease protein             |                         |    |    |   |   |   |   |
|         |                        |                      |          |          |        | 14   | 22         | 20.5212  |                                                          | 22.0000                 |    |    |   |   |   |   |
| FN1355  |                        |                      |          |          | 3      |      | 3.4321     |          | AAL95551.1  Integral membrane protein                    |                         |    |    |   |   |   |   |
|         |                        |                      |          |          |        |      |            |          |                                                          |                         |    |    |   |   |   |   |
| FN1358  | 0.128                  | 10.572               | 1.125e-1 | 5.481e-1 | 38     | 22   | 43.4738    | 28.6356  | AAL95554.1  Hypothetical protein                         |                         |    |    |   |   |   |   |
|         |                        |                      |          |          |        | 26   | 46         | 38.1108  |                                                          | 46.0000                 |    |    |   |   |   |   |
| FN1359  | -3.061                 | 16.354               | 1.608e-3 | 3.526e-3 | 97     | 760  | 110.9726   | 989.2286 | AAL95555.1  Dipeptide-binding protein                    |                         |    |    |   |   |   |   |
|         |                        |                      |          |          |        | 61   | 683        | 89.4137  |                                                          | 683.0000                |    |    |   |   |   |   |
| FN1362  |                        |                      |          |          |        | 76   |            | 98.9229  | AAL95558.1  Dipeptide transport ATP-binding protein dppD |                         |    |    |   |   |   |   |
|         |                        |                      |          |          |        | 82   |            | 82.0000  |                                                          |                         |    |    |   |   |   |   |
| FN1363  | -3.984                 | 8.662                | 7.381e-4 | 1.288e-3 | 5      | 70   | 5.7202     | 91.1132  | AAL95559.1  Dipeptide transport ATP-binding protein dppF |                         |    |    |   |   |   |   |
|         |                        |                      |          |          |        | 3    | 69         | 4.3974   |                                                          | 69.0000                 |    |    |   |   |   |   |
| FN1364  |                        |                      |          |          | 54     |      | 61.7786    |          | AAL95560.1  LSU ribosomal protein L32P                   |                         |    |    |   |   |   |   |
|         |                        |                      |          |          |        | 43   |            | 63.0293  |                                                          |                         |    |    |   |   |   |   |
| FN1365  | 0.059                  | 15.494               | 1.367e-1 | 6.849e-1 | 186    | 136  | 212.7928   | 177.0199 | AAL95561.1  GTP-binding protein                          |                         |    |    |   |   |   |   |
|         |                        |                      |          |          |        | 154  | 244        | 225.7330 |                                                          | 244.0000                |    |    |   |   |   |   |
| FN1366  | 1.709                  | 15.755               | 1.438e-5 | 5.293e-6 | 350    | 83   | 400.4166   | 108.0342 | AAL95562.1  Triosephosphate isomerase                    |                         |    |    |   |   |   |   |
|         |                        |                      |          |          |        | 307  | 152        | 450.0002 |                                                          | 152.0000                |    |    |   |   |   |   |
| FN1368  |                        |                      |          |          |        |      |            |          | AAL95564.1  COMF operon protein 3                        |                         |    |    |   |   |   |   |
|         |                        |                      |          |          |        | 4    |            | 4.0000   |                                                          |                         |    |    |   |   |   |   |

Show detected proteins only

Show all proteins

Filter by category:

GO: amino acid transport

Proteins found:  
1344

Enter (or paste) list of ORFs

Find ORFs

Test

Cutoff

q-Value

p-Value

.005

| Signif | Direction | Applies To   |
|--------|-----------|--------------|
| yes    | +         | ratios, bars |
| no     | n/a       | bars         |
| yes    | -         | ratios, bars |
| yes    | +         | p-, q-Values |
| yes    | -         | p-, q-Values |

Dot Plots Dot Plots

Fn Summary Table FnPg vs Fn FnSg vs Fn FnPgSg vs Fn FnPgSg vs FnPg FnSg vs FnPg FnPgSg vs FnSg Fn Coverage

| Protein | FnPgSg vs FnSg         |                      |          |          | Raw    |      | Normalized |           | Description                                        | Log <sub>2</sub> Ratios |    |    |   |   |   |   |
|---------|------------------------|----------------------|----------|----------|--------|------|------------|-----------|----------------------------------------------------|-------------------------|----|----|---|---|---|---|
|         | Log <sub>2</sub> Ratio | Log <sub>2</sub> Sum | q-Value  | p-Value  | FnPgSg | FnSg | FnPgSg     | FnSg      |                                                    | -6                      | -4 | -2 | 0 | 2 | 4 | 6 |
| FN1371  |                        |                      |          |          |        | 5    |            | 5.0000    | AAL95567.1  Ribonuclease HII                       |                         |    |    |   |   |   |   |
| FN1373  |                        |                      |          |          |        | 5    |            | 5.0000    | AAL95569.1  regulatory protein                     |                         |    |    |   |   |   |   |
| FN1374  | 0.364                  | 6.364                |          |          | 9      |      | 10.2964    |           | AAL95570.1  Transcriptional regulator              |                         |    |    |   |   |   |   |
| FN1375  | -0.775                 | 10.249               | 1.654e-2 | 6.324e-2 | 21     | 44   | 24.0250    | 57.2711   | AAL95571.1  Citrate-sodium symport                 |                         |    |    |   |   |   |   |
|         |                        |                      |          |          | 20     | 34   | 29.3160    | 34.0000   |                                                    |                         |    |    |   |   |   |   |
| FN1376  | -1.704                 | 18.409               | 3.514e-3 | 9.385e-3 | 319    | 647  | 364.9511   | 842.1459  | AAL95572.1  Oxaloacetate decarboxylase alpha chain |                         |    |    |   |   |   |   |
|         |                        |                      |          |          | 197    | 1288 | 288.7623   | 1288.0000 |                                                    |                         |    |    |   |   |   |   |
| FN1377  |                        |                      |          |          |        | 9    |            | 11.7145   | AAL95573.1  CITG protein                           |                         |    |    |   |   |   |   |
| FN1378  | 0.068                  | 9.747                |          |          | 23     | 22   | 26.3131    | 28.6356   | AAL95574.1  Citrate lyase acyl carrier protein     |                         |    |    |   |   |   |   |
|         |                        |                      |          |          | 23     |      | 33.7134    |           |                                                    |                         |    |    |   |   |   |   |
| FN1379  | -1.098                 | 16.327               | 2.599e-5 | 1.329e-5 | 185    | 328  | 211.6488   | 426.9302  | AAL95575.1  Citrate lyase beta chain               |                         |    |    |   |   |   |   |
|         |                        |                      |          |          | 123    | 412  | 180.2932   | 412.0000  |                                                    |                         |    |    |   |   |   |   |
| FN1380  | -0.871                 | 18.404               | 1.935e-2 | 7.586e-2 | 359    | 431  | 410.7130   | 560.9967  | AAL95576.1  Citrate lyase beta chain               |                         |    |    |   |   |   |   |
|         |                        |                      |          |          | 314    | 1032 | 460.2608   | 1032.0000 |                                                    |                         |    |    |   |   |   |   |
| FN1381  |                        |                      |          |          | 3      |      |            | 4.3974    | AAL95577.1  unknown                                |                         |    |    |   |   |   |   |
| FN1382  |                        |                      |          |          |        | 7    |            | 7.0000    | AAL95578.1  ATPase                                 |                         |    |    |   |   |   |   |
| FN1383  | -2.143                 | 5.701                |          |          | 3      | 11   | 3.4321     | 14.3178   | AAL95579.1  DNA polymerase III alpha subunit       |                         |    |    |   |   |   |   |
|         |                        |                      |          |          |        | 16   |            | 16.0000   |                                                    |                         |    |    |   |   |   |   |
| FN1385  |                        |                      |          |          |        | 4    |            | 5.2065    | AAL95581.1  Hypothetical protein                   |                         |    |    |   |   |   |   |
|         |                        |                      |          |          |        | 17   |            | 17.0000   |                                                    |                         |    |    |   |   |   |   |
| FN1386  | -0.788                 | 8.713                | 1.139e-2 | 4.104e-2 | 17     | 16   | 19.4488    | 20.8259   | AAL95582.1  SWF/SNF family helicase                |                         |    |    |   |   |   |   |
|         |                        |                      |          |          | 8      | 33   | 11.7264    | 33.0000   |                                                    |                         |    |    |   |   |   |   |
| FN1391  | 0.441                  | 10.980               | 2.531e-2 | 1.029e-1 | 39     | 37   | 44.6178    | 48.1598   | AAL95584.1  Acetyltransferase                      |                         |    |    |   |   |   |   |
|         |                        |                      |          |          | 41     | 29   | 60.0977    | 29.0000   |                                                    |                         |    |    |   |   |   |   |
| FN1392  | 1.640                  | 13.674               | 9.612e-5 | 8.249e-5 | 185    | 48   | 211.6488   | 62.4776   | AAL95585.1  SSU ribosomal protein S16P             |                         |    |    |   |   |   |   |
|         |                        |                      |          |          | 131    | 67   | 192.0196   | 67.0000   |                                                    |                         |    |    |   |   |   |   |

Show detected proteins only  
 Show all proteins  
 Filter by category:

Proteins found: 1344

Test Cutoff

| Signif | Direction | Applies To   |
|--------|-----------|--------------|
| yes    | +         | ratios, bars |
| no     | n/a       | bars         |
| yes    | -         | ratios, bars |
| yes    | +         | p-, q-Values |
| yes    | -         |              |



Fn Summary Table FnPg vs Fn FnSg vs Fn FnPgSg vs Fn FnPgSg vs FnPg FnSg vs FnPg FnPgSg vs FnSg Fn Coverage

| Protein | FnPgSg vs FnSg         |                      |          |          | Raw    |      | Normalized |           | Description                                                | Log <sub>2</sub> Ratios |    |    |   |   |   |   |
|---------|------------------------|----------------------|----------|----------|--------|------|------------|-----------|------------------------------------------------------------|-------------------------|----|----|---|---|---|---|
|         | Log <sub>2</sub> Ratio | Log <sub>2</sub> Sum | q-Value  | p-Value  | FnPgSg | FnSg | FnPgSg     | FnSg      |                                                            | -6                      | -4 | -2 | 0 | 2 | 4 | 6 |
| FN1393  | -0.400                 | 10.520               | 1.032e-2 | 3.637e-2 | 25     | 30   | 28.6012    | 39.0485   | AAL95586.1  Signal recognition particle, subunit FFH/SRP54 |                         |    |    |   |   |   |   |
|         |                        |                      |          |          | 26     | 49   | 38.1108    | 49.0000   |                                                            |                         |    |    |   |   |   |   |
| FN1397  | 1.517                  | 12.981               | 2.961e-3 | 7.552e-3 | 157    | 44   | 179.6154   | 57.2711   | AAL95590.1  Glutaminase                                    |                         |    |    |   |   |   |   |
|         |                        |                      |          |          | 85     | 49   | 124.5929   | 49.0000   |                                                            |                         |    |    |   |   |   |   |
| FN1398  | 2.140                  | 13.100               | 2.006e-7 | 1.127e-8 | 171    | 34   | 195.6321   | 44.2550   | AAL95591.1  Amino acid carrier protein alsT                |                         |    |    |   |   |   |   |
|         |                        |                      |          |          | 135    | 45   | 197.8828   | 45.0000   |                                                            |                         |    |    |   |   |   |   |
| FN1399  |                        |                      |          |          |        |      |            |           | AAL95592.1  Hypothetical cytosolic protein                 |                         |    |    |   |   |   |   |
|         |                        |                      |          |          |        | 3    |            | 3.0000    |                                                            |                         |    |    |   |   |   |   |
| FN1400  |                        |                      |          |          |        |      |            |           | AAL95593.1  serine/threonine kinase                        |                         |    |    |   |   |   |   |
|         |                        |                      |          |          | 7      |      | 10.2606    |           |                                                            |                         |    |    |   |   |   |   |
| FN1406  | -0.294                 | 12.198               | 1.098e-2 | 3.923e-2 | 48     | 59   | 54.9143    | 76.7954   | AAL95599.1  Histidine ammonia-lyase                        |                         |    |    |   |   |   |   |
|         |                        |                      |          |          | 47     | 75   | 68.8925    | 75.0000   |                                                            |                         |    |    |   |   |   |   |
| FN1407  | -0.828                 | 9.272                | 3.635e-2 | 1.551e-1 | 7      | 34   | 8.0083     | 44.2550   | AAL95600.1  Glutamate formiminotransferase                 |                         |    |    |   |   |   |   |
|         |                        |                      |          |          | 20     | 22   | 29.3160    | 22.0000   |                                                            |                         |    |    |   |   |   |   |
| FN1411  | -2.016                 | 17.207               | 1.444e-4 | 1.406e-4 | 210    | 594  | 240.2499   | 773.1602  | AAL95604.1  Threonine dehydratase                          |                         |    |    |   |   |   |   |
|         |                        |                      |          |          | 100    | 791  | 146.5799   | 791.0000  |                                                            |                         |    |    |   |   |   |   |
| FN1412  |                        |                      |          |          |        |      |            |           | AAL95605.1  5-methylthioribose kinase                      |                         |    |    |   |   |   |   |
|         |                        |                      |          |          |        | 6    |            | 7.8097    |                                                            |                         |    |    |   |   |   |   |
| FN1413  | -0.221                 | 3.779                |          |          |        |      |            |           | AAL95606.1  Translation initiation factor EIF-2B subunit 1 |                         |    |    |   |   |   |   |
|         |                        |                      |          |          | 3      |      | 3.4321     |           |                                                            |                         |    |    |   |   |   |   |
| FN1415  |                        |                      |          |          |        |      |            |           | AAL95608.1  NADH-dependent butanol dehydrogenase A         |                         |    |    |   |   |   |   |
|         |                        |                      |          |          |        | 13   |            | 13.0000   |                                                            |                         |    |    |   |   |   |   |
| FN1416  | 0.339                  | 4.339                |          |          |        |      |            |           | AAL95609.1  Transcriptional regulator, GntR family         |                         |    |    |   |   |   |   |
|         |                        |                      |          |          | 5      |      | 5.7202     |           |                                                            |                         |    |    |   |   |   |   |
| FN1417  | -0.807                 | 5.839                |          |          |        |      |            |           | AAL95610.1  L-fucose phosphate aldolase                    |                         |    |    |   |   |   |   |
|         |                        |                      |          |          | 3      | 4    | 4.3974     | 4.0000    |                                                            |                         |    |    |   |   |   |   |
| FN1418  |                        |                      |          |          |        |      |            |           | AAL95611.1  Transcriptional regulator, GntR family         |                         |    |    |   |   |   |   |
|         |                        |                      |          |          |        | 5    | 10         | 5.7202    |                                                            | 13.0162                 |    |    |   |   |   |   |
| FN1419  | -0.389                 | 23.078               | 3.057e-2 | 1.273e-1 | 2312   | 2104 | 2645.0375  | 2738.6012 | AAL95612.1  Methionine gamma-lyase                         |                         |    |    |   |   |   |   |
|         |                        |                      |          |          | 1743   | 4072 | 2554.8870  | 4072.0000 |                                                            |                         |    |    |   |   |   |   |
| FN1420  |                        |                      |          |          |        |      |            |           | AAL95613.1  NA+/H+ antiporter NHAC                         |                         |    |    |   |   |   |   |
|         |                        |                      |          |          | 14     |      | 16.0167    |           |                                                            |                         |    |    |   |   |   |   |

Show detected proteins only  
 Show all proteins  
 Filter by category:

Proteins found: 1344

Enter (or paste) list of ORFs

Find ORFs

Test Cutoff

q-Value

p-Value

.005

| Signif | Direction | Applies To   |
|--------|-----------|--------------|
| yes    | +         | ratios, bars |
| no     | n/a       | bars         |
| yes    | -         | ratios, bars |
| yes    | +         | p-, q-Values |
| yes    | -         | p-, q-Values |

Dot Plots Dot Plots

Fn Summary Table FnPg vs Fn FnSg vs Fn FnPgSg vs Fn FnPgSg vs FnPg FnSg vs FnPg FnPgSg vs FnSg Fn Coverage

| Protein | FnPgSg vs FnSg         |                      |          |          | Raw    |      | Normalized |           | Description                                                                         | Log <sub>2</sub> Ratios |    |    |   |   |   |   |
|---------|------------------------|----------------------|----------|----------|--------|------|------------|-----------|-------------------------------------------------------------------------------------|-------------------------|----|----|---|---|---|---|
|         | Log <sub>2</sub> Ratio | Log <sub>2</sub> Sum | q-Value  | p-Value  | FnPgSg | FnSg | FnPgSg     | FnSg      |                                                                                     | -6                      | -4 | -2 | 0 | 2 | 4 | 6 |
| FN1421  | -0.388                 | 21.141               | 1.186e-5 | 3.823e-6 | 1134   | 1356 | 1297.3497  | 1764.9921 | AAL95614.1  Pyruvate-flavodoxin oxidoreductase                                      |                         |    |    |   |   |   |   |
|         |                        |                      |          |          | 929    | 1714 | 1361.7269  | 1714.0000 |                                                                                     |                         |    |    |   |   |   |   |
| FN1423  | -0.043                 | 15.872               | 1.138e-1 | 5.554e-1 | 227    | 186  | 259.6988   | 242.1007  | AAL95616.1  Flavoprotein                                                            |                         |    |    |   |   |   |   |
|         |                        |                      |          |          | 152    | 255  | 222.8014   | 255.0000  |                                                                                     |                         |    |    |   |   |   |   |
| FN1424  | -0.164                 | 17.884               | 7.677e-2 | 3.597e-1 | 478    | 362  | 546.8546   | 471.1852  | AAL95617.1  ACYL-COA dehydrogenase, short-chain specific                            |                         |    |    |   |   |   |   |
|         |                        |                      |          |          | 261    | 570  | 382.5734   | 570.0000  |                                                                                     |                         |    |    |   |   |   |   |
| FN1426  | -0.819                 | 15.789               | 9.156e-4 | 1.726e-3 | 130    | 232  | 148.7262   | 301.9750  | AAL95619.1  Serine protease                                                         |                         |    |    |   |   |   |   |
|         |                        |                      |          |          | 143    | 330  | 209.6092   | 330.0000  |                                                                                     |                         |    |    |   |   |   |   |
| FN1427  |                        |                      |          |          | 6      |      | 6.8643     |           | AAL95620.1  Phenazine biosynthesis protein phzF                                     |                         |    |    |   |   |   |   |
|         |                        |                      |          |          | 4      |      | 5.8632     |           |                                                                                     |                         |    |    |   |   |   |   |
| FN1432  | 2.819                  | 6.819                |          |          | 25     |      | 28.6012    |           | AAL95625.1  Leucine-, isoleucine-, valine-, threonine-, and alanine-binding protein |                         |    |    |   |   |   |   |
|         |                        |                      |          |          | 19     | 4    | 27.8502    | 4.0000    |                                                                                     |                         |    |    |   |   |   |   |
| FN1433  | 0.859                  | 16.060               | 1.59e-3  | 3.476e-3 | 336    | 150  | 384.3999   | 195.2425  | AAL95626.1  Short chain dehydrogenase                                               |                         |    |    |   |   |   |   |
|         |                        |                      |          |          | 218    | 193  | 319.5441   | 193.0000  |                                                                                     |                         |    |    |   |   |   |   |
| FN1434  | -0.590                 | 13.843               | 5.628e-4 | 8.827e-4 | 92     | 114  | 105.2524   | 148.3843  | AAL95627.1  Tetratricopeptide repeat family protein                                 |                         |    |    |   |   |   |   |
|         |                        |                      |          |          | 63     | 149  | 92.3453    | 149.0000  |                                                                                     |                         |    |    |   |   |   |   |
| FN1437  | 1.182                  | 13.312               | 1.097e-3 | 2.193e-3 | 117    | 56   | 133.8535   | 72.8905   | AAL95630.1  LSU ribosomal protein L28P                                              |                         |    |    |   |   |   |   |
|         |                        |                      |          |          | 116    | 61   | 170.0326   | 61.0000   |                                                                                     |                         |    |    |   |   |   |   |
| FN1439  | 1.874                  | 8.183                | 2.529e-3 | 6.227e-3 | 34     | 6    | 38.8976    | 7.8097    | AAL95632.1  Transcriptional regulator, DeoR family                                  |                         |    |    |   |   |   |   |
|         |                        |                      |          |          | 18     | 10   | 26.3844    | 10.0000   |                                                                                     |                         |    |    |   |   |   |   |
| FN1440  | 1.337                  | 9.961                | 1.364e-3 | 2.869e-3 | 48     | 9    | 54.9143    | 11.7145   | AAL95633.1  1-phosphofructokinase                                                   |                         |    |    |   |   |   |   |
|         |                        |                      |          |          | 31     | 28   | 45.4398    | 28.0000   |                                                                                     |                         |    |    |   |   |   |   |
| FN1441  | 0.270                  | 14.298               | 1.316e-2 | 4.852e-2 | 129    | 111  | 147.5821   | 144.4794  | AAL95634.1  PTS system, fructose-specific IIABC component                           |                         |    |    |   |   |   |   |
|         |                        |                      |          |          | 112    | 114  | 164.1694   | 114.0000  |                                                                                     |                         |    |    |   |   |   |   |
| FN1444  | 0.054                  | 17.275               | 1.14e-1  | 5.564e-1 | 375    | 274  | 429.0178   | 356.6429  | AAL95637.1  GMP synthase (glutamine-hydrolyzing)                                    |                         |    |    |   |   |   |   |
|         |                        |                      |          |          | 261    | 425  | 382.5734   | 425.0000  |                                                                                     |                         |    |    |   |   |   |   |
| FN1445  | 1.199                  | 9.100                | 9.208e-6 | 2.511e-6 | 30     | 13   | 34.3214    | 16.9210   | AAL95638.1  DNA helicase                                                            |                         |    |    |   |   |   |   |
|         |                        |                      |          |          | 25     | 14   | 36.6450    | 14.0000   |                                                                                     |                         |    |    |   |   |   |   |
| FN1448  |                        |                      |          |          |        |      |            |           | AAL95641.1  Hypothetical cytosolic protein                                          |                         |    |    |   |   |   |   |
|         |                        |                      |          |          |        | 4    |            | 4.0000    |                                                                                     |                         |    |    |   |   |   |   |
| FN1449  | 3.275                  | 12.524               | 2.129e-3 | 4.994e-3 | 165    | 21   | 188.7678   | 27.3339   | AAL95642.1  Fusobacterium outer membrane protein family                             |                         |    |    |   |   |   |   |
|         |                        |                      |          |          | 197    | 22   | 288.7623   | 22.0000   |                                                                                     |                         |    |    |   |   |   |   |

Show detected proteins only  
 Show all proteins  
 Filter by category:

Proteins found: 1344

Test Cutoff

| Signif | Direction | Applies To   |
|--------|-----------|--------------|
| yes    | +         | ratios, bars |
| no     | n/a       | bars         |
| yes    | -         | ratios, bars |
| yes    | +         | p-, q-Values |
| yes    | -         |              |

Fn Summary Table FnPg vs Fn FnSg vs Fn FnPgSg vs Fn FnPgSg vs FnPg FnSg vs FnPg FnPgSg vs FnSg Fn Coverage

| Protein | FnPgSg vs FnSg         |                      |          |          | Raw    |      | Normalized |          | Description                                                                                     | Log <sub>2</sub> Ratios |    |    |   |   |   |   |
|---------|------------------------|----------------------|----------|----------|--------|------|------------|----------|-------------------------------------------------------------------------------------------------|-------------------------|----|----|---|---|---|---|
|         | Log <sub>2</sub> Ratio | Log <sub>2</sub> Sum | q-Value  | p-Value  | FnPgSg | FnSg | FnPgSg     | FnSg     |                                                                                                 | -6                      | -4 | -2 | 0 | 2 | 4 | 6 |
| FN1450  | -1.635                 | 8.842                |          |          | 11     | 29   | 12.5845    | 37.7469  | AAL95643.1  Integral membrane protein                                                           |                         |    |    |   |   |   |   |
|         |                        |                      |          |          | 8      |      | 11.7264    |          |                                                                                                 |                         |    |    |   |   |   |   |
| FN1451  | -0.949                 | 15.265               | 1.036e-4 | 9.063e-5 | 110    | 204  | 125.8452   | 265.5298 | AAL95644.1  Cell division protein ftsZ                                                          |                         |    |    |   |   |   |   |
|         |                        |                      |          |          | 109    | 286  | 159.7720   | 286.0000 |                                                                                                 |                         |    |    |   |   |   |   |
| FN1452  | -0.977                 | 13.505               | 2.168e-4 | 2.45e-4  | 78     | 108  | 89.2357    | 140.5746 | AAL95645.1  Cell division protein ftsA                                                          |                         |    |    |   |   |   |   |
|         |                        |                      |          |          | 44     | 162  | 64.4951    | 162.0000 |                                                                                                 |                         |    |    |   |   |   |   |
| FN1454  | 0.287                  | 9.481                | 1.131e-1 | 5.516e-1 | 26     | 8    | 29.7452    | 10.4129  | AAL95647.1  D-alanine--D-alanine ligase                                                         |                         |    |    |   |   |   |   |
|         |                        |                      |          |          | 20     | 38   | 29.3160    | 38.0000  |                                                                                                 |                         |    |    |   |   |   |   |
| FN1455  | -0.498                 | 8.134                | 3.193e-2 | 1.337e-1 | 8      | 16   | 9.1524     | 20.8259  | AAL95648.1  UDP-N-acetylenolpyruvoylglucosamine reductase                                       |                         |    |    |   |   |   |   |
|         |                        |                      |          |          | 13     | 19   | 19.0554    | 19.0000  |                                                                                                 |                         |    |    |   |   |   |   |
| FN1456  | -0.332                 | 11.712               | 1.046e-2 | 3.699e-2 | 39     | 53   | 44.6178    | 68.9857  | AAL95649.1  UDP-N-acetylmuramate--alanine ligase                                                |                         |    |    |   |   |   |   |
|         |                        |                      |          |          | 40     | 61   | 58.6319    | 61.0000  |                                                                                                 |                         |    |    |   |   |   |   |
| FN1457  | -1.085                 | 10.262               | 1.183e-2 | 4.286e-2 | 19     | 50   | 21.7369    | 65.0808  | AAL95650.1  UDP-N-acetylglucosamine-N-acetylmuramyl-Pentapeptide pyrophosphoryl-undecaprenol N- |                         |    |    |   |   |   |   |
|         |                        |                      |          |          | 18     | 37   | 26.3844    | 37.0000  |                                                                                                 |                         |    |    |   |   |   |   |
| FN1458  | -0.481                 | 11.529               | 2.93e-2  | 1.213e-1 | 42     | 38   | 48.0500    | 49.4614  | AAL95651.1  UDP-N-acetylmuramoylalanine--D-glutamate ligase                                     |                         |    |    |   |   |   |   |
|         |                        |                      |          |          | 30     | 79   | 43.9740    | 79.0000  |                                                                                                 |                         |    |    |   |   |   |   |
| FN1461  | -0.068                 | 8.745                | 1.704e-1 | 8.883e-1 | 20     | 8    | 22.8809    | 10.4129  | AAL95654.1  Histidinol-phosphatase                                                              |                         |    |    |   |   |   |   |
|         |                        |                      |          |          | 12     | 32   | 17.5896    | 32.0000  |                                                                                                 |                         |    |    |   |   |   |   |
| FN1462  |                        |                      |          |          |        | 3    |            | 3.9048   | AAL95655.1  Transcriptional regulator, GntR family                                              |                         |    |    |   |   |   |   |
|         |                        |                      |          |          |        |      |            |          |                                                                                                 |                         |    |    |   |   |   |   |
| FN1463  | 0.238                  | 17.657               | 9.733e-4 | 1.869e-3 | 448    | 332  | 512.5332   | 432.1367 | AAL95656.1  pyridoxine biosynthesis protein                                                     |                         |    |    |   |   |   |   |
|         |                        |                      |          |          | 324    | 405  | 474.9187   | 405.0000 |                                                                                                 |                         |    |    |   |   |   |   |
| FN1464  | -1.262                 | 15.882               | 8.35e-6  | 2.115e-6 | 125    | 302  | 143.0059   | 393.0882 | AAL95657.1  1-deoxyxylulose-5-phosphate synthase                                                |                         |    |    |   |   |   |   |
|         |                        |                      |          |          | 119    | 368  | 174.4300   | 368.0000 |                                                                                                 |                         |    |    |   |   |   |   |
| FN1470  | 4.001                  | 8.617                | 2.536e-4 | 3.074e-4 | 63     | 3    | 72.0750    | 3.9048   | AAL95663.1  Hypothetical protein                                                                |                         |    |    |   |   |   |   |
|         |                        |                      |          |          | 59     | 6    | 86.4821    | 6.0000   |                                                                                                 |                         |    |    |   |   |   |   |
| FN1471  | 0.533                  | 4.499                |          |          | 5      | 3    | 5.7202     | 3.9048   | AAL95664.1  LACI-family transcription regulator                                                 |                         |    |    |   |   |   |   |
|         |                        |                      |          |          |        | 4    |            | 4.0000   |                                                                                                 |                         |    |    |   |   |   |   |
| FN1472  | 2.200                  | 11.564               | 1.217e-7 | 4.607e-9 | 105    | 21   | 120.1250   | 27.3339  | AAL95665.1  N-acetylneuraminate-binding protein                                                 |                         |    |    |   |   |   |   |
|         |                        |                      |          |          | 79     | 24   | 115.7981   | 24.0000  |                                                                                                 |                         |    |    |   |   |   |   |
| FN1475  | 3.394                  | 10.037               |          |          | 103    |      | 117.8369   |          | AAL95668.1  N-acetylneuraminate lyase                                                           |                         |    |    |   |   |   |   |
|         |                        |                      |          |          | 63     | 10   | 92.3453    | 10.0000  |                                                                                                 |                         |    |    |   |   |   |   |

Show detected proteins only  
 Show all proteins  
 Filter by category:

Proteins found: 1344

Test Cutoff

| Signif | Direction | Applies To   |
|--------|-----------|--------------|
| yes    | +         | ratios, bars |
| no     | n/a       | bars         |
| yes    | -         | ratios, bars |
| yes    | +         | p-, q-Values |
| yes    | -         |              |

Fn Summary Table FnPg vs Fn FnSg vs Fn FnPgSg vs Fn FnPgSg vs FnPg FnSg vs FnPg FnPgSg vs FnSg Fn Coverage

| Protein | FnPgSg vs FnSg         |                      |          |          | Raw    |      | Normalized |          | Description                                                          | Log <sub>2</sub> Ratios |    |    |   |   |   |   |
|---------|------------------------|----------------------|----------|----------|--------|------|------------|----------|----------------------------------------------------------------------|-------------------------|----|----|---|---|---|---|
|         | Log <sub>2</sub> Ratio | Log <sub>2</sub> Sum | q-Value  | p-Value  | FnPgSg | FnSg | FnPgSg     | FnSg     |                                                                      | -6                      | -4 | -2 | 0 | 2 | 4 | 6 |
| FN1476  |                        |                      |          |          | 11     |      | 12.5845    |          | AAL95669.1  N-acetylmannosamine-6-phosphate 2-epimerase              |                         |    |    |   |   |   |   |
|         |                        |                      |          |          | 9      |      | 13.1922    |          |                                                                      |                         |    |    |   |   |   |   |
| FN1478  | -0.659                 | 8.102                |          |          |        | 16   |            | 20.8259  | AAL95671.1  Hypothetical protein                                     |                         |    |    |   |   |   |   |
|         |                        |                      |          |          | 9      |      | 13.1922    |          |                                                                      |                         |    |    |   |   |   |   |
| FN1479  | -0.050                 | 9.109                | 1.613e-1 | 8.319e-1 | 25     | 16   | 28.6012    | 20.8259  | AAL95672.1  Hypothetical protein                                     |                         |    |    |   |   |   |   |
|         |                        |                      |          |          | 12     | 27   | 17.5896    | 27.0000  |                                                                      |                         |    |    |   |   |   |   |
| FN1480  | -2.243                 | 7.997                | 3.816e-5 | 2.332e-5 | 9      | 25   | 10.2964    | 32.5404  | AAL95673.1  MG2+ transporter MGTE                                    |                         |    |    |   |   |   |   |
|         |                        |                      |          |          | 3      | 37   | 4.3974     | 37.0000  |                                                                      |                         |    |    |   |   |   |   |
| FN1481  | -1.121                 | 5.509                |          |          | 4      | 3    | 4.5762     | 3.9048   | AAL95674.1  Queuine tRNA-ribosyltransferase                          |                         |    |    |   |   |   |   |
|         |                        |                      |          |          |        | 16   |            | 16.0000  |                                                                      |                         |    |    |   |   |   |   |
| FN1482  | -2.395                 | 10.891               | 8.523e-4 | 1.576e-3 | 14     | 66   | 16.0167    | 85.9067  | AAL95675.1  Guanosine-3',5'-bis(Diphosphate) 3'-pyrophosphohydrolase |                         |    |    |   |   |   |   |
|         |                        |                      |          |          | 15     | 114  | 21.9870    | 114.0000 |                                                                      |                         |    |    |   |   |   |   |
| FN1483  | 1.321                  | 10.557               | 9.241e-6 | 2.527e-6 | 56     | 17   | 64.0667    | 22.1275  | AAL95676.1  Adenine phosphoribosyltransferase                        |                         |    |    |   |   |   |   |
|         |                        |                      |          |          | 40     | 27   | 58.6319    | 27.0000  |                                                                      |                         |    |    |   |   |   |   |
| FN1484  | 0.116                  | 5.969                | 1.375e-1 | 6.898e-1 | 8      | 4    | 9.1524     | 5.2065   | AAL95677.1  Tetratricopeptide repeat family protein                  |                         |    |    |   |   |   |   |
|         |                        |                      |          |          | 5      | 10   | 7.3290     | 10.0000  |                                                                      |                         |    |    |   |   |   |   |
| FN1485  |                        |                      |          |          |        |      |            |          | AAL95678.1  Transporter                                              |                         |    |    |   |   |   |   |
|         |                        |                      |          |          |        | 4    |            | 4.0000   |                                                                      |                         |    |    |   |   |   |   |
| FN1486  | 0.017                  | 4.661                |          |          | 5      |      | 5.7202     |          | AAL95679.1  magnesium and cobalt efflux protein CorC                 |                         |    |    |   |   |   |   |
|         |                        |                      |          |          | 3      | 5    | 4.3974     | 5.0000   |                                                                      |                         |    |    |   |   |   |   |
| FN1487  | 0.453                  | 14.703               | 2.011e-2 | 7.932e-2 | 197    | 110  | 225.3773   | 143.1778 | AAL95681.1  Chorismate mutase                                        |                         |    |    |   |   |   |   |
|         |                        |                      |          |          | 107    | 136  | 156.8405   | 136.0000 |                                                                      |                         |    |    |   |   |   |   |
| FN1488  | -0.320                 | 7.855                |          |          | 11     |      | 12.5845    |          | AAL95682.1  Methylenetetrahydrofolate dehydrogenase (NADP+)          |                         |    |    |   |   |   |   |
|         |                        |                      |          |          | 10     | 17   | 14.6580    | 17.0000  |                                                                      |                         |    |    |   |   |   |   |
| FN1489  | -1.407                 | 7.710                | 2.615e-3 | 6.485e-3 | 4      | 17   | 4.5762     | 22.1275  | AAL95683.1  Methionyl-tRNA formyltransferase                         |                         |    |    |   |   |   |   |
|         |                        |                      |          |          | 9      | 25   | 13.1922    | 25.0000  |                                                                      |                         |    |    |   |   |   |   |
| FN1490  | -2.020                 | 8.023                |          |          | 7      | 33   | 8.0083     | 42.9533  | AAL95684.1  putative regulatory protein                              |                         |    |    |   |   |   |   |
|         |                        |                      |          |          |        | 22   |            | 22.0000  |                                                                      |                         |    |    |   |   |   |   |
| FN1491  |                        |                      |          |          |        | 15   |            | 19.5242  | AAL95685.1  PTS system, IIA component                                |                         |    |    |   |   |   |   |
|         |                        |                      |          |          |        | 17   |            | 17.0000  |                                                                      |                         |    |    |   |   |   |   |
| FN1492  |                        |                      |          |          |        |      |            |          | AAL95686.1  DNA repair protein recO                                  |                         |    |    |   |   |   |   |
|         |                        |                      |          |          |        | 4    |            | 4.0000   |                                                                      |                         |    |    |   |   |   |   |

Show detected proteins only  
 Show all proteins  
 Filter by category:

Proteins found: 1344

Test Cutoff

| Signif | Direction | Applies To   |
|--------|-----------|--------------|
| yes    | +         | ratios, bars |
| no     | n/a       | bars         |
| yes    | -         | ratios, bars |
| yes    | +         | p-, q-Values |
| yes    | -         |              |

Fn Summary Table FnPg vs Fn FnSg vs Fn FnPgSg vs Fn FnPgSg vs FnPg FnSg vs FnPg FnPgSg vs FnSg Fn Coverage

| Protein | FnPgSg vs FnSg         |                      |          |          | Raw    |      | Normalized |          | Description                                                       | Log <sub>2</sub> Ratios |    |    |   |   |   |   |
|---------|------------------------|----------------------|----------|----------|--------|------|------------|----------|-------------------------------------------------------------------|-------------------------|----|----|---|---|---|---|
|         | Log <sub>2</sub> Ratio | Log <sub>2</sub> Sum | q-Value  | p-Value  | FnPgSg | FnSg | FnPgSg     | FnSg     |                                                                   | -6                      | -4 | -2 | 0 | 2 | 4 | 6 |
| FN1493  |                        |                      |          |          |        | 5    |            | 6.5081   | AAL95687.1  Hypothetical protein                                  |                         |    |    |   |   |   |   |
|         |                        |                      |          |          |        | 5    |            | 5.0000   |                                                                   |                         |    |    |   |   |   |   |
| FN1494  | 0.492                  | 7.386                | 2.162e-2 | 8.641e-2 | 14     | 6    | 16.0167    | 7.8097   | AAL95680.1  Rod shape-determining protein mreC                    |                         |    |    |   |   |   |   |
|         |                        |                      |          |          | 10     | 14   | 14.6580    | 14.0000  |                                                                   |                         |    |    |   |   |   |   |
| FN1496  | 0.492                  | 7.386                | 2.162e-2 | 8.641e-2 | 14     | 6    | 16.0167    | 7.8097   | AAL95680.1  Rod shape-determining protein mreC                    |                         |    |    |   |   |   |   |
|         |                        |                      |          |          | 10     | 14   | 14.6580    | 14.0000  |                                                                   |                         |    |    |   |   |   |   |
| FN1499  | 2.421                  | 11.593               | 8.024e-4 | 1.446e-3 | 98     | 20   | 112.1166   | 26.0323  | AAL93625.1  Cell surface protein                                  |                         |    |    |   |   |   |   |
|         |                        |                      |          |          | 99     | 22   | 145.1141   | 22.0000  |                                                                   |                         |    |    |   |   |   |   |
| FN1501  |                        |                      |          |          |        |      |            |          | AAL93627.1  Nickel transport ATP-binding protein nikD             |                         |    |    |   |   |   |   |
|         |                        |                      |          |          | 3      |      | 4.3974     |          |                                                                   |                         |    |    |   |   |   |   |
| FN1504  | -0.001                 | 13.807               | 1.875e-1 | 9.983e-1 | 117    | 121  | 133.8535   | 157.4956 | AAL93630.1  Nickel-binding protein                                |                         |    |    |   |   |   |   |
|         |                        |                      |          |          | 72     | 82   | 105.5375   | 82.0000  |                                                                   |                         |    |    |   |   |   |   |
| FN1505  | -0.313                 | 15.185               | 1.25e-2  | 4.571e-2 | 158    | 183  | 180.7595   | 238.1958 | AAL93631.1  6,7-dimethyl-8-ribityllumazine synthase               |                         |    |    |   |   |   |   |
|         |                        |                      |          |          | 113    | 192  | 165.6352   | 192.0000 |                                                                   |                         |    |    |   |   |   |   |
| FN1506  | 1.242                  | 7.582                |          |          | 18     |      | 20.5929    |          | AAL93632.1  Diaminohydroxyphosphoribosylaminopyrimidine deaminase |                         |    |    |   |   |   |   |
|         |                        |                      |          |          | 15     | 9    | 21.9870    | 9.0000   |                                                                   |                         |    |    |   |   |   |   |
| FN1507  |                        |                      |          |          |        |      |            |          | AAL93633.1  Riboflavin synthase alpha chain                       |                         |    |    |   |   |   |   |
|         |                        |                      |          |          |        | 8    |            | 8.0000   |                                                                   |                         |    |    |   |   |   |   |
| FN1508  | 1.190                  | 13.143               | 2.274e-3 | 5.431e-3 | 123    | 33   | 140.7178   | 42.9533  | AAL93634.1  GTP cyclohydrolase II                                 |                         |    |    |   |   |   |   |
|         |                        |                      |          |          | 100    | 83   | 146.5799   | 83.0000  |                                                                   |                         |    |    |   |   |   |   |
| FN1512  |                        |                      |          |          | 3      |      | 3.4321     |          | AAL93638.1  hypothetical exported 24-amino acid repeat protein    |                         |    |    |   |   |   |   |
|         |                        |                      |          |          | 3      |      | 4.3974     |          |                                                                   |                         |    |    |   |   |   |   |
| FN1517  | 0.717                  | 15.358               | 4.067e-5 | 2.59e-5  | 235    | 115  | 268.8511   | 149.6859 | AAL93643.1  Leucyl-tRNA synthetase                                |                         |    |    |   |   |   |   |
|         |                        |                      |          |          | 175    | 170  | 256.5148   | 170.0000 |                                                                   |                         |    |    |   |   |   |   |
| FN1518  |                        |                      |          |          |        |      |            |          | AAL93644.1  RNA polymerase sigma-H factor                         |                         |    |    |   |   |   |   |
|         |                        |                      |          |          |        | 6    |            | 6.0000   |                                                                   |                         |    |    |   |   |   |   |
| FN1519  | 0.452                  | 8.942                | 2.137e-3 | 5.019e-3 | 21     | 13   | 24.0250    | 16.9210  | AAL93645.1  23S rRNA methyltransferase                            |                         |    |    |   |   |   |   |
|         |                        |                      |          |          | 19     | 21   | 27.8502    | 21.0000  |                                                                   |                         |    |    |   |   |   |   |
| FN1520  | 1.873                  | 12.087               | 3.96e-4  | 5.496e-4 | 122    | 23   | 139.5738   | 29.9372  | AAL93646.1  UDP-N-acetylglucosamine 1-carboxyvinyltransferase     |                         |    |    |   |   |   |   |
|         |                        |                      |          |          | 77     | 39   | 112.8665   | 39.0000  |                                                                   |                         |    |    |   |   |   |   |
| FN1523  | 1.706                  | 14.503               | 1.385e-5 | 4.947e-6 | 253    | 72   | 289.4440   | 93.7164  | AAL93649.1  Dipeptide-binding protein                             |                         |    |    |   |   |   |   |
|         |                        |                      |          |          | 178    | 75   | 260.9122   | 75.0000  |                                                                   |                         |    |    |   |   |   |   |

Show detected proteins only  
 Show all proteins  
 Filter by category:

Proteins found: 1344

Test Cutoff

| Signif | Direction | Applies To   |
|--------|-----------|--------------|
| yes    | +         | ratios, bars |
| no     | n/a       | bars         |
| yes    | -         | ratios, bars |
| yes    | +         | p-, q-Values |
| yes    | -         |              |

Fn Summary Table FnPg vs Fn FnSg vs Fn FnPgSg vs Fn FnPgSg vs FnPg FnSg vs FnPg FnPgSg vs FnSg Fn Coverage

| Protein | FnPgSg vs FnSg         |                      |          |          | Raw    |      | Normalized |           | Description                                                                     | Log <sub>2</sub> Ratios |    |    |   |   |   |   |
|---------|------------------------|----------------------|----------|----------|--------|------|------------|-----------|---------------------------------------------------------------------------------|-------------------------|----|----|---|---|---|---|
|         | Log <sub>2</sub> Ratio | Log <sub>2</sub> Sum | q-Value  | p-Value  | FnPgSg | FnSg | FnPgSg     | FnSg      |                                                                                 | -6                      | -4 | -2 | 0 | 2 | 4 | 6 |
| FN1525  |                        |                      |          |          | 6      |      | 8.7948     |           | AAL93651.1  Dipeptide transport ATP-binding protein dppF                        |                         |    |    |   |   |   |   |
| FN1526  | 1.911                  | 19.903               | 4.134e-4 | 5.808e-4 | 1491   | 332  | 1705.7746  | 432.1367  | AAL93652.1  Fusobacterium outer membrane protein family                         |                         |    |    |   |   |   |   |
| FN1527  | 2.156                  | 11.778               | 2.965e-4 | 3.802e-4 | 97     | 17   | 110.9726   | 22.1275   | AAL93653.1  Hypothetical protein                                                |                         |    |    |   |   |   |   |
| FN1528  | 1.030                  | 12.745               | 3.81e-3  | 1.044e-2 | 84     | 33   | 96.1000    | 42.9533   | AAL93654.1  Hypothetical protein                                                |                         |    |    |   |   |   |   |
| FN1529  | 2.305                  | 10.397               | 2.849e-3 | 7.201e-3 | 53     | 20   | 60.6345    | 26.0323   | AAL93655.1  Hypothetical protein                                                |                         |    |    |   |   |   |   |
| FN1531  | -0.110                 | 11.514               | 1.356e-1 | 6.788e-1 | 59     | 41   | 67.4988    | 53.3663   | AAL93657.1  murein hydrolase export regulator                                   |                         |    |    |   |   |   |   |
| FN1533  | 0.849                  | 18.575               | 1.527e-4 | 1.522e-4 | 744    | 329  | 851.1712   | 428.2318  | AAL93659.1  Electron transfer flavoprotein alpha-subunit                        |                         |    |    |   |   |   |   |
| FN1534  | 0.149                  | 19.624               | 1.102e-2 | 3.942e-2 | 868    | 651  | 993.0331   | 847.3524  | AAL93660.1  Electron transfer flavoprotein beta-subunit                         |                         |    |    |   |   |   |   |
| FN1535  | -0.225                 | 21.166               | 3.56e-2  | 1.514e-1 | 1208   | 1107 | 1382.0092  | 1440.8895 | AAL93661.1  Acyl-CoA dehydrogenase, short-chain specific                        |                         |    |    |   |   |   |   |
| FN1536  | -1.018                 | 19.518               | 3.619e-3 | 9.751e-3 | 539    | 806  | 616.6415   | 1049.1029 | AAL93662.1  (S)-2-hydroxy-acid oxidase chain D                                  |                         |    |    |   |   |   |   |
| FN1537  |                        |                      |          |          |        |      |            |           | AAL93663.1  Arsenical pump-driving ATPase                                       |                         |    |    |   |   |   |   |
| FN1538  | -1.367                 | 8.095                |          |          | 9      | 17   | 10.2964    | 22.1275   | AAL93664.1  Arsenical pump-driving ATPase                                       |                         |    |    |   |   |   |   |
| FN1539  | 0.000                  | 15.351               | 1.875e-1 | 9.985e-1 | 187    | 162  | 213.9369   | 210.8619  | AAL93665.1  Iron-sulfur cluster-binding protein                                 |                         |    |    |   |   |   |   |
| FN1540  | -1.518                 | 16.012               | 7.272e-5 | 5.677e-5 | 122    | 355  | 139.5738   | 462.0739  | AAL93666.1  Iron-sulfur cluster-binding protein                                 |                         |    |    |   |   |   |   |
| FN1544  | -1.629                 | 16.905               | 3.492e-4 | 4.696e-4 | 156    | 428  | 178.4714   | 557.0919  | AAL93670.1  Probable electron transfer flavoprotein-quinone oxidoreductase ydiS |                         |    |    |   |   |   |   |
| FN1545  | -0.558                 | 9.924                | 5.84e-3  | 1.832e-2 | 18     | 32   | 20.5929    | 41.6517   | AAL93671.1  Ferredoxin like protein                                             |                         |    |    |   |   |   |   |

Show detected proteins only  
 Show all proteins  
 Filter by category:

Proteins found:  
1344

Test Cutoff

| Signif | Direction | Applies To   |
|--------|-----------|--------------|
| yes    | +         | ratios, bars |
| no     | n/a       | bars         |
| yes    | -         | ratios, bars |
| yes    | +         | p-, q-Values |
| yes    | -         |              |

Fn Summary Table FnPg vs Fn FnSg vs Fn FnPgSg vs Fn FnPgSg vs FnPg FnSg vs FnPg FnPgSg vs FnSg Fn Coverage

| Protein | FnPgSg vs FnSg         |                      |          |          | Raw    |      | Normalized |           | Description                                                           | Log <sub>2</sub> Ratios |    |    |   |   |   |   |
|---------|------------------------|----------------------|----------|----------|--------|------|------------|-----------|-----------------------------------------------------------------------|-------------------------|----|----|---|---|---|---|
|         | Log <sub>2</sub> Ratio | Log <sub>2</sub> Sum | q-Value  | p-Value  | FnPgSg | FnSg | FnPgSg     | FnSg      |                                                                       | -6                      | -4 | -2 | 0 | 2 | 4 | 6 |
| FN1546  | 0.061                  | 21.076               | 7.716e-2 | 3.617e-1 | 1330   | 1041 | 1521.5830  | 1354.9828 | AAL93672.1  Protein Translation Elongation Factor G (EF-G)            |                         |    |    |   |   |   |   |
|         |                        |                      |          |          | 1034   | 1557 | 1515.6358  | 1557.0000 |                                                                       |                         |    |    |   |   |   |   |
| FN1547  | 0.547                  | 14.320               | 3.02e-4  | 3.895e-4 | 151    | 95   | 172.7512   | 123.6536  | AAL93673.1  PTS permease for N-acetylglucosamine and glucose          |                         |    |    |   |   |   |   |
|         |                        |                      |          |          | 118    | 113  | 172.9642   | 113.0000  |                                                                       |                         |    |    |   |   |   |   |
| FN1548  | 0.847                  | 10.823               | 2.627e-2 | 1.073e-1 | 37     | 38   | 42.3298    | 49.4614   | AAL93674.1  Hypothetical protein                                      |                         |    |    |   |   |   |   |
|         |                        |                      |          |          | 49     | 14   | 71.8241    | 14.0000   |                                                                       |                         |    |    |   |   |   |   |
| FN1549  | 0.597                  | 19.887               | 7.166e-3 | 2.351e-2 | 1019   | 750  | 1165.7843  | 976.2124  | AAL93675.1  Stomatin like protein                                     |                         |    |    |   |   |   |   |
|         |                        |                      |          |          | 857    | 625  | 1256.1894  | 625.0000  |                                                                       |                         |    |    |   |   |   |   |
| FN1552  |                        |                      |          |          |        |      |            |           | AAL93678.1  abortive phage resistance protein                         |                         |    |    |   |   |   |   |
|         |                        |                      |          |          |        | 9    |            | 9.0000    |                                                                       |                         |    |    |   |   |   |   |
| FN1553  | 0.105                  | 9.025                | 1.563e-1 | 8.012e-1 | 26     | 10   | 29.7452    | 13.0162   | AAL93679.1  abortive phage resistance protein                         |                         |    |    |   |   |   |   |
|         |                        |                      |          |          | 12     | 31   | 17.5896    | 31.0000   |                                                                       |                         |    |    |   |   |   |   |
| FN1554  | 0.386                  | 15.521               | 2.281e-2 | 9.171e-2 | 195    | 114  | 223.0892   | 148.3843  | AAL93680.1  Fusobacterium outer membrane protein family               |                         |    |    |   |   |   |   |
|         |                        |                      |          |          | 186    | 231  | 272.6385   | 231.0000  |                                                                       |                         |    |    |   |   |   |   |
| FN1555  | 0.422                  | 24.514               | 3.167e-5 | 1.753e-5 | 5050   | 3291 | 5777.4392  | 4283.6201 | AAL93681.1  Protein Translation Elongation Factor Tu                  |                         |    |    |   |   |   |   |
|         |                        |                      |          |          | 3790   | 4174 | 5555.3767  | 4174.0000 |                                                                       |                         |    |    |   |   |   |   |
| FN1556  | 1.439                  | 19.980               | 9.46e-5  | 8.076e-5 | 1392   | 372  | 1592.5139  | 484.2014  | AAL93682.1  Protein Translation Elongation Factor G (EF-G)            |                         |    |    |   |   |   |   |
|         |                        |                      |          |          | 1199   | 751  | 1757.4925  | 751.0000  |                                                                       |                         |    |    |   |   |   |   |
| FN1557  | 1.540                  | 15.860               | 1.154e-4 | 1.039e-4 | 381    | 113  | 435.8820   | 147.0827  | AAL93683.1  SSU ribosomal protein S7P                                 |                         |    |    |   |   |   |   |
|         |                        |                      |          |          | 270    | 139  | 395.7656   | 139.0000  |                                                                       |                         |    |    |   |   |   |   |
| FN1558  |                        |                      |          |          |        |      |            |           | AAL93684.1  SSU ribosomal protein S12P                                |                         |    |    |   |   |   |   |
|         |                        |                      |          |          | 83     |      | 121.6613   |           |                                                                       |                         |    |    |   |   |   |   |
| FN1560  | -1.383                 | 14.767               | 9.93e-6  | 2.895e-6 | 86     | 200  | 98.3881    | 260.3233  | AAL93686.1  unknown                                                   |                         |    |    |   |   |   |   |
|         |                        |                      |          |          | 74     | 279  | 108.4691   | 279.0000  |                                                                       |                         |    |    |   |   |   |   |
| FN1562  | -1.406                 | 6.438                |          |          | 5      | 11   | 5.7202     | 14.3178   | AAL93688.1  Phospho-2-dehydro-3-deoxyheptonate aldolase               |                         |    |    |   |   |   |   |
|         |                        |                      |          |          |        | 16   |            | 16.0000   |                                                                       |                         |    |    |   |   |   |   |
| FN1576  |                        |                      |          |          |        |      |            |           | AAL93691.1  ATPases and helicase subunits involved in DNA replication |                         |    |    |   |   |   |   |
|         |                        |                      |          |          |        | 5    |            | 6.5081    |                                                                       |                         |    |    |   |   |   |   |
| FN1577  | -1.213                 | 16.089               | 2.63e-4  | 3.247e-4 | 152    | 325  | 173.8952   | 423.0254  | AAL93692.1  Rod shape-determining protein mreB                        |                         |    |    |   |   |   |   |
|         |                        |                      |          |          | 118    | 381  | 172.9642   | 381.0000  |                                                                       |                         |    |    |   |   |   |   |
| FN1579  | -0.718                 | 12.817               | 1.064e-3 | 2.105e-3 | 62     | 76   | 70.9309    | 98.9229   | AAL93694.1  CysteinyI-tRNA synthetase                                 |                         |    |    |   |   |   |   |
|         |                        |                      |          |          | 42     | 119  | 61.5635    | 119.0000  |                                                                       |                         |    |    |   |   |   |   |

Show detected proteins only  
 Show all proteins  
 Filter by category:

Proteins found:  
1344

Test Cutoff

| Signif | Direction | Applies To   |
|--------|-----------|--------------|
| yes    | +         | ratios, bars |
| no     | n/a       | bars         |
| yes    | -         | ratios, bars |
| yes    | +         | p-, q-Values |
| yes    | -         |              |

Fn Summary Table FnPg vs Fn FnSg vs Fn FnPgSg vs Fn FnPgSg vs FnPg FnSg vs FnPg FnPgSg vs FnSg Fn Coverage

| Protein | FnPgSg vs FnSg         |                      |          |          | Raw    |      | Normalized |           | Description                                                        | Log <sub>2</sub> Ratios |    |    |   |   |   |   |
|---------|------------------------|----------------------|----------|----------|--------|------|------------|-----------|--------------------------------------------------------------------|-------------------------|----|----|---|---|---|---|
|         | Log <sub>2</sub> Ratio | Log <sub>2</sub> Sum | q-Value  | p-Value  | FnPgSg | FnSg | FnPgSg     | FnSg      |                                                                    | -6                      | -4 | -2 | 0 | 2 | 4 | 6 |
| FN1580  |                        |                      |          |          |        | 3    |            | 3.0000    | AAL93695.1  2-C-methyl-D-erythritol 4-phosphate cytidyltransferase |                         |    |    |   |   |   |   |
| FN1581  | -1.020                 | 11.384               | 5.226e-3 | 1.589e-2 | 34     | 67   | 38.8976    | 87.2083   | AAL93696.1  DNA mismatch repair protein mutS                       |                         |    |    |   |   |   |   |
| FN1582  |                        |                      |          |          |        | 12   |            | 15.6194   | AAL93697.1  Hypothetical protein                                   |                         |    |    |   |   |   |   |
|         |                        |                      |          |          |        | 30   |            | 30.0000   |                                                                    |                         |    |    |   |   |   |   |
| FN1586  |                        |                      |          |          |        | 9    |            | 11.7145   | AAL93701.1  O-succinylbenzoate-CoA synthase                        |                         |    |    |   |   |   |   |
|         |                        |                      |          |          |        | 9    |            | 9.0000    |                                                                    |                         |    |    |   |   |   |   |
| FN1589  | -0.478                 | 9.546                | 2.575e-7 | 1.687e-8 | 20     | 25   | 22.8809    | 32.5404   | AAL93704.1  LexA repressor                                         |                         |    |    |   |   |   |   |
|         |                        |                      |          |          |        | 16   | 32         | 23.4528   | 32.0000                                                            |                         |    |    |   |   |   |   |
| FN1590  |                        |                      |          |          |        | 3    |            | 3.9048    | AAL93705.1  Hypothetical lipoprotein                               |                         |    |    |   |   |   |   |
|         |                        |                      |          |          |        | 4    |            | 4.0000    |                                                                    |                         |    |    |   |   |   |   |
| FN1591  | 0.390                  | 15.478               | 1.912e-2 | 7.478e-2 | 202    | 173  | 231.0976   | 225.1797  | AAL93706.1  RNFB-related protein                                   |                         |    |    |   |   |   |   |
|         |                        |                      |          |          |        | 176  | 148        | 257.9806  | 148.0000                                                           |                         |    |    |   |   |   |   |
| FN1592  | 1.552                  | 6.722                |          |          |        |      |            |           | AAL93707.1  Na(+)-translocating NADH-quinone reductase subunit D   |                         |    |    |   |   |   |   |
|         |                        |                      |          |          |        | 12   | 6          | 17.5896   | 6.0000                                                             |                         |    |    |   |   |   |   |
| FN1594  | 1.586                  | 11.842               | 4.133e-5 | 2.661e-5 | 90     | 23   | 102.9643   | 29.9372   | AAL93709.1  Nitrogen fixation protein RNFG                         |                         |    |    |   |   |   |   |
|         |                        |                      |          |          |        | 73   | 40         | 107.0033  | 40.0000                                                            |                         |    |    |   |   |   |   |
| FN1595  | 0.832                  | 14.394               | 1.055e-4 | 9.263e-5 | 177    | 76   | 202.4964   | 98.9229   | AAL93710.1  Na(+)-translocating NADH-quinone reductase subunit B   |                         |    |    |   |   |   |   |
|         |                        |                      |          |          |        | 129  | 121        | 189.0880  | 121.0000                                                           |                         |    |    |   |   |   |   |
| FN1596  | 1.183                  | 18.578               | 2.504e-4 | 3.016e-4 | 748    | 359  | 855.7474   | 467.2803  | AAL93711.1  Nitrogen fixation iron-sulphur protein RNFC            |                         |    |    |   |   |   |   |
|         |                        |                      |          |          |        | 702  | 363        | 1028.9906 | 363.0000                                                           |                         |    |    |   |   |   |   |
| FN1597  |                        |                      |          |          |        | 4    |            | 4.5762    | AAL93712.1  Peptidyl-tRNA hydrolase                                |                         |    |    |   |   |   |   |
| FN1600  |                        |                      |          |          |        |      | 5          | 6.5081    | AAL93715.1  tRNA pseudouridine synthase A                          |                         |    |    |   |   |   |   |
|         |                        |                      |          |          |        |      | 7          | 7.0000    |                                                                    |                         |    |    |   |   |   |   |
| FN1601  |                        |                      |          |          |        |      | 5          | 6.5081    | AAL93716.1  Hypothetical cytosolic protein                         |                         |    |    |   |   |   |   |
|         |                        |                      |          |          |        |      | 12         | 12.0000   |                                                                    |                         |    |    |   |   |   |   |
| FN1602  |                        |                      |          |          |        |      |            |           | AAL93717.1  Hypothetical cytosolic protein                         |                         |    |    |   |   |   |   |
|         |                        |                      |          |          |        | 4    |            | 5.8632    |                                                                    |                         |    |    |   |   |   |   |
| FN1603  | 0.688                  | 5.094                | 4.226e-2 | 1.843e-1 | 4      | 4    | 4.5762     | 5.2065    | AAL93718.1  2',3'-cyclic nucleotide 3'-phosphodiesterase           |                         |    |    |   |   |   |   |
|         |                        |                      |          |          |        | 7    | 4          | 10.2606   | 4.0000                                                             |                         |    |    |   |   |   |   |

Show detected proteins only  
 Show all proteins  
 Filter by category:

Proteins found: 1344

Test Cutoff

| Signif | Direction | Applies To   |
|--------|-----------|--------------|
| yes    | +         | ratios, bars |
| no     | n/a       | bars         |
| yes    | -         | ratios, bars |
| yes    | +         | p-, q-Values |
| yes    | -         |              |



Fn Summary Table FnPg vs Fn FnSg vs Fn FnPgSg vs Fn FnPgSg vs FnPg FnSg vs FnPg FnPgSg vs FnSg Fn Coverage

| Protein | FnPgSg vs FnSg         |                      |          |          | Raw    |      | Normalized |          | Description                                              | Log <sub>2</sub> Ratios |    |    |   |   |   |   |
|---------|------------------------|----------------------|----------|----------|--------|------|------------|----------|----------------------------------------------------------|-------------------------|----|----|---|---|---|---|
|         | Log <sub>2</sub> Ratio | Log <sub>2</sub> Sum | q-Value  | p-Value  | FnPgSg | FnSg | FnPgSg     | FnSg     |                                                          | -6                      | -4 | -2 | 0 | 2 | 4 | 6 |
| FN1605  | -0.227                 | 16.382               | 1.356e-5 | 4.77e-6  | 239    | 240  | 273.4273   | 312.3880 | AAL93720.1  Adenylosuccinate synthetase                  |                         |    |    |   |   |   |   |
|         |                        |                      |          |          | 182    | 320  | 266.7753   | 320.0000 |                                                          |                         |    |    |   |   |   |   |
| FN1606  | -1.043                 | 9.113                | 2.985e-4 | 3.836e-4 | 12     | 25   | 13.7286    | 32.5404  | AAL93721.1  3-deoxy-D-manno-octulosonic-acid transferase |                         |    |    |   |   |   |   |
|         |                        |                      |          |          | 13     | 35   | 19.0554    | 35.0000  |                                                          |                         |    |    |   |   |   |   |
| FN1607  | -0.734                 | 7.838                |          |          |        | 10   |            | 13.0162  | AAL93722.1  Cytidylate kinase                            |                         |    |    |   |   |   |   |
|         |                        |                      |          |          | 8      | 26   | 11.7264    | 26.0000  |                                                          |                         |    |    |   |   |   |   |
| FN1608  |                        |                      |          |          |        | 7    |            | 9.1113   | AAL93723.1  Ribosomal protein L11 methyltransferase      |                         |    |    |   |   |   |   |
|         |                        |                      |          |          |        | 9    |            | 9.0000   |                                                          |                         |    |    |   |   |   |   |
| FN1609  | 0.040                  | 4.349                |          |          | 4      | 3    | 4.5762     | 3.9048   | AAL93724.1  Hypothetical protein                         |                         |    |    |   |   |   |   |
|         |                        |                      |          |          |        | 5    |            | 5.0000   |                                                          |                         |    |    |   |   |   |   |
| FN1610  | -1.349                 | 9.036                | 1.228e-5 | 4.038e-6 | 11     | 27   | 12.5845    | 35.1436  | AAL93725.1  33 kDa chaperonin                            |                         |    |    |   |   |   |   |
|         |                        |                      |          |          | 11     | 38   | 16.1238    | 38.0000  |                                                          |                         |    |    |   |   |   |   |
| FN1613  | 0.174                  | 8.672                | 1.115e-1 | 5.429e-1 | 17     | 10   | 19.4488    | 13.0162  | AAL93728.1  Hypothetical protein                         |                         |    |    |   |   |   |   |
|         |                        |                      |          |          | 16     | 25   | 23.4528    | 25.0000  |                                                          |                         |    |    |   |   |   |   |
| FN1614  | 0.395                  | 8.451                | 5.26e-3  | 1.603e-2 | 17     | 12   | 19.4488    | 15.6194  | AAL93729.1  MG(2+) chelatase family protein              |                         |    |    |   |   |   |   |
|         |                        |                      |          |          | 16     | 17   | 23.4528    | 17.0000  |                                                          |                         |    |    |   |   |   |   |
| FN1616  | 2.355                  | 9.525                |          |          | 74     |      | 84.6595    |          | AAL93731.1  N utilization substance protein B            |                         |    |    |   |   |   |   |
|         |                        |                      |          |          | 26     | 12   | 38.1108    | 12.0000  |                                                          |                         |    |    |   |   |   |   |
| FN1618  | 0.001                  | 11.496               | 1.87e-1  | 9.948e-1 | 44     | 38   | 50.3381    | 49.4614  | AAL93733.1  Hypothetical protein                         |                         |    |    |   |   |   |   |
|         |                        |                      |          |          | 39     | 58   | 57.1661    | 58.0000  |                                                          |                         |    |    |   |   |   |   |
| FN1619  | 0.716                  | 16.400               | 6.592e-3 | 2.122e-2 | 282    | 129  | 322.6214   | 167.9085 | AAL93734.1  Hypothetical cytosolic protein               |                         |    |    |   |   |   |   |
|         |                        |                      |          |          | 294    | 291  | 430.9448   | 291.0000 |                                                          |                         |    |    |   |   |   |   |
| FN1620  | 0.955                  | 17.983               | 4.72e-5  | 3.227e-5 | 624    | 296  | 713.8856   | 385.2785 | AAL93735.1  SSU ribosomal protein S2P                    |                         |    |    |   |   |   |   |
|         |                        |                      |          |          | 480    | 346  | 703.5833   | 346.0000 |                                                          |                         |    |    |   |   |   |   |
| FN1621  | 1.508                  | 19.702               | 1.141e-3 | 2.309e-3 | 1181   | 379  | 1351.1199  | 493.3127 | AAL93736.1  Protein Translation Elongation Factor Ts     |                         |    |    |   |   |   |   |
|         |                        |                      |          |          | 1203   | 602  | 1763.3557  | 602.0000 |                                                          |                         |    |    |   |   |   |   |
| FN1622  | 1.127                  | 14.655               | 3.045e-3 | 7.82e-3  | 224    | 51   | 256.2666   | 66.3824  | AAL93737.1  Uridylate kinase                             |                         |    |    |   |   |   |   |
|         |                        |                      |          |          | 149    | 151  | 218.4040   | 151.0000 |                                                          |                         |    |    |   |   |   |   |
| FN1623  | 2.164                  | 10.409               | 3.734e-6 | 6.834e-7 | 66     | 16   | 75.5071    | 20.8259  | AAL93738.1  Ribosome Recycling Factor (RRF)              |                         |    |    |   |   |   |   |
|         |                        |                      |          |          | 55     | 14   | 80.6189    | 14.0000  |                                                          |                         |    |    |   |   |   |   |
| FN1624  | 1.969                  | 10.465               |          |          | 66     |      | 75.5071    |          | AAL93739.1  Protein translocase subunit secY             |                         |    |    |   |   |   |   |
|         |                        |                      |          |          | 50     | 19   | 73.2899    | 19.0000  |                                                          |                         |    |    |   |   |   |   |

Show detected proteins only  
 Show all proteins  
 Filter by category:

Proteins found: 1344

Enter (or paste) list of ORFs

Find ORFs

Test Cutoff

q-Value p-Value

.005

| Signif | Direction | Applies To   |
|--------|-----------|--------------|
| yes    | +         | ratios, bars |
| no     | n/a       | bars         |
| yes    | -         | ratios, bars |
| yes    | +         | p-, q-Values |
| yes    | -         | p-, q-Values |

Dot Plots Dot Plots

Fn Summary Table FnPg vs Fn FnSg vs Fn FnPgSg vs Fn FnPgSg vs FnPg FnSg vs FnPg FnPgSg vs FnSg Fn Coverage

| Protein | FnPgSg vs FnSg         |                      |          |           | Raw    |      | Normalized |          | Description                            | Log <sub>2</sub> Ratios |    |    |   |   |   |   |
|---------|------------------------|----------------------|----------|-----------|--------|------|------------|----------|----------------------------------------|-------------------------|----|----|---|---|---|---|
|         | Log <sub>2</sub> Ratio | Log <sub>2</sub> Sum | q-Value  | p-Value   | FnPgSg | FnSg | FnPgSg     | FnSg     |                                        | -6                      | -4 | -2 | 0 | 2 | 4 | 6 |
| FN1625  | 0.865                  | 13.221               | 6.324e-5 | 4.749e-5  | 114    | 59   | 130.4214   | 76.7954  | AAL93740.1  LSU ribosomal protein L15P |                         |    |    |   |   |   |   |
|         |                        |                      |          |           | 91     | 68   | 133.3877   | 68.0000  |                                        |                         |    |    |   |   |   |   |
| FN1626  | 3.416                  | 8.060                |          |           | 51     |      | 58.3464    |          | AAL93741.1  LSU ribosomal protein L30P |                         |    |    |   |   |   |   |
|         |                        |                      |          |           | 33     | 5    | 48.3714    | 5.0000   |                                        |                         |    |    |   |   |   |   |
| FN1627  | 1.537                  | 17.562               | 4.071e-3 | 1.141e-2  | 791    | 184  | 904.9415   | 239.4974 | AAL93742.1  SSU ribosomal protein S5P  |                         |    |    |   |   |   |   |
|         |                        |                      |          |           | 405    | 277  | 593.6484   | 277.0000 |                                        |                         |    |    |   |   |   |   |
| FN1628  | 3.952                  | 11.883               |          |           | 242    | 12   | 276.8595   | 15.6194  | AAL93743.1  LSU ribosomal protein L18P |                         |    |    |   |   |   |   |
|         |                        |                      |          |           | 141    |      | 206.6776   |          |                                        |                         |    |    |   |   |   |   |
| FN1629  | 0.485                  | 15.761               | 4.258e-3 | 1.213e-2  | 217    | 167  | 248.2583   | 217.3700 | AAL93744.1  LSU ribosomal protein L6P  |                         |    |    |   |   |   |   |
|         |                        |                      |          |           | 211    | 181  | 309.2835   | 181.0000 |                                        |                         |    |    |   |   |   |   |
| FN1630  | 1.312                  | 13.560               | 1.543e-2 | 5.831e-2  | 204    | 58   | 233.3857   | 75.4938  | AAL93745.1  SSU ribosomal protein S8P  |                         |    |    |   |   |   |   |
|         |                        |                      |          |           | 77     | 64   | 112.8665   | 64.0000  |                                        |                         |    |    |   |   |   |   |
| FN1631  | 3.112                  | 7.043                |          |           | 27     | 3    | 30.8893    | 3.9048   | AAL93746.1  SSU ribosomal protein S14P |                         |    |    |   |   |   |   |
|         |                        |                      |          |           | 25     |      | 36.6450    |          |                                        |                         |    |    |   |   |   |   |
| FN1632  | 0.663                  | 16.499               | 9.545e-4 | 1.822e-3  | 326    | 208  | 372.9594   | 270.7362 | AAL93747.1  LSU ribosomal protein L5P  |                         |    |    |   |   |   |   |
|         |                        |                      |          |           | 268    | 213  | 392.8340   | 213.0000 |                                        |                         |    |    |   |   |   |   |
| FN1634  | 1.575                  | 9.737                |          |           | 51     | 13   | 58.3464    | 16.9210  | AAL93749.1  LSU ribosomal protein L24P |                         |    |    |   |   |   |   |
|         |                        |                      |          |           | 29     |      | 42.5082    |          |                                        |                         |    |    |   |   |   |   |
| FN1635  | 3.003                  | 10.102               | 1.381e-3 | 2.914e-3  | 68     | 8    | 77.7952    | 10.4129  | AAL93750.1  LSU ribosomal protein L14P |                         |    |    |   |   |   |   |
|         |                        |                      |          |           | 75     | 13   | 109.9349   | 13.0000  |                                        |                         |    |    |   |   |   |   |
| FN1636  | -0.998                 | 11.537               | 5.464e-4 | 8.462e-4  | 29     | 60   | 33.1774    | 78.0970  | AAL93751.1  SSU ribosomal protein S17P |                         |    |    |   |   |   |   |
|         |                        |                      |          |           | 30     | 76   | 43.9740    | 76.0000  |                                        |                         |    |    |   |   |   |   |
| FN1637  |                        |                      |          |           | 34     |      | 38.8976    |          | AAL93752.1  LSU ribosomal protein L29P |                         |    |    |   |   |   |   |
|         |                        |                      |          |           | 31     |      | 45.4398    |          |                                        |                         |    |    |   |   |   |   |
| FN1638  | 3.360                  | 13.433               | 1.988e-8 | 3.763e-10 | 292    | 22   | 334.0618   | 28.6356  | AAL93753.1  LSU ribosomal protein L16P |                         |    |    |   |   |   |   |
|         |                        |                      |          |           | 232    | 37   | 340.0653   | 37.0000  |                                        |                         |    |    |   |   |   |   |
| FN1639  | 1.360                  | 19.260               | 1.117e-3 | 2.248e-3  | 1241   | 355  | 1419.7628  | 462.0739 | AAL93754.1  SSU ribosomal protein S3P  |                         |    |    |   |   |   |   |
|         |                        |                      |          |           | 763    | 527  | 1118.4043  | 527.0000 |                                        |                         |    |    |   |   |   |   |
| FN1640  | 3.707                  | 14.280               | 8.917e-4 | 1.669e-3  | 380    | 30   | 434.7380   | 39.0485  | AAL93755.1  LSU ribosomal protein L22P |                         |    |    |   |   |   |   |
|         |                        |                      |          |           | 399    | 39   | 584.8536   | 39.0000  |                                        |                         |    |    |   |   |   |   |
| FN1641  | 3.790                  | 12.264               | 8.772e-5 | 7.307e-5  | 246    | 9    | 281.4357   | 11.7145  | AAL93756.1  SSU ribosomal protein S19P |                         |    |    |   |   |   |   |
|         |                        |                      |          |           | 164    | 26   | 240.3910   | 26.0000  |                                        |                         |    |    |   |   |   |   |

Show detected proteins only  
 Show all proteins  
 Filter by category:

Proteins found: 1344

Test Cutoff

| Signif | Direction | Applies To   |
|--------|-----------|--------------|
| yes    | +         | ratios, bars |
| no     | n/a       | bars         |
| yes    | -         | ratios, bars |
| yes    | +         | p-, q-Values |
| yes    | -         |              |

Fn Summary Table FnPg vs Fn FnSg vs Fn FnPgSg vs Fn FnPgSg vs FnPg FnSg vs FnPg FnPgSg vs FnSg Fn Coverage

| Protein | FnPgSg vs FnSg         |                      |          |          | Raw    |      | Normalized |          | Description                                   | Log <sub>2</sub> Ratios |    |    |   |   |   |   |
|---------|------------------------|----------------------|----------|----------|--------|------|------------|----------|-----------------------------------------------|-------------------------|----|----|---|---|---|---|
|         | Log <sub>2</sub> Ratio | Log <sub>2</sub> Sum | q-Value  | p-Value  | FnPgSg | FnSg | FnPgSg     | FnSg     |                                               | -6                      | -4 | -2 | 0 | 2 | 4 | 6 |
| FN1642  | 0.455                  | 15.741               | 5.236e-3 | 1.593e-2 | 233    | 175  | 266.5630   | 227.7829 | AAL93757.1  LSU ribosomal protein L2P         |                         |    |    |   |   |   |   |
|         |                        |                      |          |          | 192    | 172  | 281.4333   | 172.0000 |                                               |                         |    |    |   |   |   |   |
| FN1643  | 1.505                  | 11.806               | 9.626e-6 | 2.727e-6 | 84     | 30   | 96.1000    | 39.0485  | AAL93758.1  LSU ribosomal protein L23P        |                         |    |    |   |   |   |   |
|         |                        |                      |          |          | 72     | 32   | 105.5375   | 32.0000  |                                               |                         |    |    |   |   |   |   |
| FN1644  | 0.626                  | 20.263               | 2.405e-5 | 1.199e-5 | 1202   | 721  | 1375.1449  | 938.4655 | AAL93759.1  LSU ribosomal protein L1E         |                         |    |    |   |   |   |   |
|         |                        |                      |          |          | 963    | 867  | 1411.5641  | 867.0000 |                                               |                         |    |    |   |   |   |   |
| FN1645  | 3.258                  | 16.412               | 5.771e-5 | 4.215e-5 | 764    | 76   | 874.0522   | 98.9229  | AAL93760.1  LSU ribosomal protein L3P         |                         |    |    |   |   |   |   |
|         |                        |                      |          |          | 650    | 92   | 952.7691   | 92.0000  |                                               |                         |    |    |   |   |   |   |
| FN1646  | 1.022                  | 14.483               | 2.781e-3 | 6.99e-3  | 163    | 84   | 186.4797   | 109.3358 | AAL93761.1  SSU ribosomal protein S10P        |                         |    |    |   |   |   |   |
|         |                        |                      |          |          | 167    | 103  | 244.7884   | 103.0000 |                                               |                         |    |    |   |   |   |   |
| FN1647  | 2.174                  | 15.936               | 1.044e-3 | 2.05e-3  | 530    | 82   | 606.3451   | 106.7326 | AAL93762.1  Hypothetical protein              |                         |    |    |   |   |   |   |
|         |                        |                      |          |          | 312    | 129  | 457.3292   | 129.0000 |                                               |                         |    |    |   |   |   |   |
| FN1652  | 0.445                  | 12.827               | 1.013e-3 | 1.971e-3 | 88     | 60   | 100.6762   | 78.0970  | AAL93767.1  Oligopeptide-binding protein oppA |                         |    |    |   |   |   |   |
|         |                        |                      |          |          | 67     | 68   | 98.2085    | 68.0000  |                                               |                         |    |    |   |   |   |   |
| FN1654  | -1.656                 | 12.293               | 2.333e-5 | 1.151e-5 | 39     | 98   | 44.6178    | 127.5584 | AAL93769.1  Hypothetical protein              |                         |    |    |   |   |   |   |
|         |                        |                      |          |          | 24     | 124  | 35.1792    | 124.0000 |                                               |                         |    |    |   |   |   |   |
| FN1655  | -2.095                 | 12.936               | 7.488e-3 | 2.483e-2 | 39     | 96   | 44.6178    | 124.9552 | AAL93770.1  Hypothetical cytosolic protein    |                         |    |    |   |   |   |   |
|         |                        |                      |          |          | 28     | 241  | 41.0424    | 241.0000 |                                               |                         |    |    |   |   |   |   |
| FN1656  |                        |                      |          |          | 21     |      | 24.0250    |          | AAL93771.1  SSU ribosomal protein S18P        |                         |    |    |   |   |   |   |
|         |                        |                      |          |          | 27     |      | 39.5766    |          |                                               |                         |    |    |   |   |   |   |
| FN1657  | 0.463                  | 12.009               | 4.037e-3 | 1.128e-2 | 60     | 41   | 68.6428    | 53.3663  | AAL93772.1  SSU ribosomal protein S6P         |                         |    |    |   |   |   |   |
|         |                        |                      |          |          | 56     | 56   | 82.0847    | 56.0000  |                                               |                         |    |    |   |   |   |   |
| FN1658  | 0.888                  | 14.810               | 1.659e-4 | 1.699e-4 | 189    | 90   | 216.2250   | 117.1455 | AAL93773.1  Prolyl-tRNA synthetase            |                         |    |    |   |   |   |   |
|         |                        |                      |          |          | 167    | 132  | 244.7884   | 132.0000 |                                               |                         |    |    |   |   |   |   |
| FN1660  |                        |                      |          |          |        |      |            | 5.0000   | AAL93775.1  ATP-dependent DNA helicase recG   |                         |    |    |   |   |   |   |
|         |                        |                      |          |          |        |      |            |          |                                               |                         |    |    |   |   |   |   |
| FN1661  | 1.229                  | 10.064               | 4.444e-4 | 6.38e-4  | 44     | 19   | 50.3381    | 24.7307  | AAL93776.1  Hypothetical cytosolic protein    |                         |    |    |   |   |   |   |
|         |                        |                      |          |          | 34     | 18   | 49.8372    | 18.0000  |                                               |                         |    |    |   |   |   |   |
| FN1662  | -0.563                 | 10.324               | 6.141e-3 | 1.949e-2 | 31     | 30   | 35.4655    | 39.0485  | AAL93777.1  Hypothetical protein              |                         |    |    |   |   |   |   |
|         |                        |                      |          |          | 16     | 48   | 23.4528    | 48.0000  |                                               |                         |    |    |   |   |   |   |
| FN1663  | 1.003                  | 7.720                | 5.653e-3 | 1.756e-2 | 18     | 5    | 20.5929    | 6.5081   | AAL93778.1  Hypothetical protein              |                         |    |    |   |   |   |   |
|         |                        |                      |          |          | 14     | 14   | 20.5212    | 14.0000  |                                               |                         |    |    |   |   |   |   |

Show detected proteins only  
 Show all proteins  
 Filter by category:  
 GO: amino acid transport

Proteins found:  
 1344

Enter (or paste) list of ORFs

Test Cutoff  
  
 .005

| Signif | Direction | Applies To   |
|--------|-----------|--------------|
| yes    | +         | ratios, bars |
| no     | n/a       | bars         |
| yes    | -         | ratios, bars |
| yes    | +         | p-, q-Values |
| yes    | -         |              |

Fn Summary Table FnPg vs Fn FnSg vs Fn FnPgSg vs Fn FnPgSg vs FnPg FnSg vs FnPg FnPgSg vs FnSg Fn Coverage

| Protein | FnPgSg vs FnSg         |                      |          |          | Raw    |      | Normalized |          | Description                                                     | Log <sub>2</sub> Ratios |    |    |   |   |   |   |
|---------|------------------------|----------------------|----------|----------|--------|------|------------|----------|-----------------------------------------------------------------|-------------------------|----|----|---|---|---|---|
|         | Log <sub>2</sub> Ratio | Log <sub>2</sub> Sum | q-Value  | p-Value  | FnPgSg | FnSg | FnPgSg     | FnSg     |                                                                 | -6                      | -4 | -2 | 0 | 2 | 4 | 6 |
| FN1667  |                        |                      |          |          |        | 3    |            | 3.0000   | AAL93782.1  dTDP-glucose 4,6-dehydratase                        |                         |    |    |   |   |   |   |
| FN1668  |                        |                      |          |          |        | 3    |            | 3.0000   | AAL93783.1  Cholinephosphate cytidyltransferase                 |                         |    |    |   |   |   |   |
| FN1670  | -0.252                 | 9.763                | 5.485e-2 | 2.474e-1 | 28     | 21   | 32.0333    | 27.3339  | AAL93785.1  Choline kinase                                      |                         |    |    |   |   |   |   |
| FN1676  |                        |                      |          |          |        | 3    |            | 3.0000   | AAL93791.1  Transposase                                         |                         |    |    |   |   |   |   |
| FN1679  | -0.622                 | 17.766               | 2.498e-4 | 3.005e-4 | 354    | 423  | 404.9928   | 550.5838 | AAL93794.1  LPS biosynthesis protein WbpG                       |                         |    |    |   |   |   |   |
| FN1683  | 0.343                  | 11.442               | 7.21e-2  | 3.357e-1 | 68     | 42   | 77.7952    | 54.6679  | AAL93798.1  Acetyltransferase                                   |                         |    |    |   |   |   |   |
| FN1684  | 0.626                  | 16.464               | 5.469e-3 | 1.683e-2 | 311    | 146  | 355.7987   | 190.0360 | AAL93799.1  N-acetylneuraminate synthase                        |                         |    |    |   |   |   |   |
| FN1685  | 0.185                  | 11.704               | 1.554e-2 | 5.879e-2 | 50     | 41   | 57.2024    | 53.3663  | AAL93800.1  dTDP-4-dehydrorhamnose reductase                    |                         |    |    |   |   |   |   |
| FN1686  | 0.052                  | 15.894               | 1.496e-1 | 7.61e-1  | 256    | 168  | 292.8761   | 218.6716 | AAL93801.1  Spore coat polysaccharide biosynthesis protein spsF |                         |    |    |   |   |   |   |
| FN1687  | 0.302                  | 15.375               | 3.05e-2  | 1.269e-1 | 222    | 117  | 253.9785   | 152.2891 | AAL93802.1  Gluconate 5-dehydrogenase                           |                         |    |    |   |   |   |   |
| FN1688  | 1.180                  | 12.300               | 2.947e-4 | 3.771e-4 | 92     | 31   | 105.2524   | 40.3501  | AAL93803.1  Oxidoreductase                                      |                         |    |    |   |   |   |   |
| FN1689  | 1.095                  | 17.218               | 1.834e-4 | 1.941e-4 | 494    | 226  | 565.1594   | 294.1653 | AAL93804.1  UDP-N-acetylglucosamine 4,6-dehydratase             |                         |    |    |   |   |   |   |
| FN1690  | -0.743                 | 10.046               | 5.163e-3 | 1.566e-2 | 26     | 27   | 29.7452    | 35.1436  | AAL93805.1  Hypothetical protein                                |                         |    |    |   |   |   |   |
| FN1692  | -0.106                 | 11.186               | 1.502e-1 | 7.645e-1 | 57     | 37   | 65.2107    | 48.1598  | AAL93807.1  Glycosyl transferase                                |                         |    |    |   |   |   |   |
| FN1693  | 0.730                  | 7.817                | 1.56e-2  | 5.904e-2 | 21     | 11   | 24.0250    | 14.3178  | AAL93808.1  Hypothetical protein                                |                         |    |    |   |   |   |   |
| FN1694  | 1.307                  | 12.090               | 2.917e-5 | 1.558e-5 | 88     | 33   | 100.6762   | 42.9533  | AAL93809.1  UDP-N-acetyl-D-quinovosamine 4-epimerase            |                         |    |    |   |   |   |   |

Show detected proteins only  
 Show all proteins  
 Filter by category:

Proteins found: 1344

Test Cutoff

| Signif | Direction | Applies To   |
|--------|-----------|--------------|
| yes    | +         | ratios, bars |
| no     | n/a       | bars         |
| yes    | -         | ratios, bars |
| yes    | +         | p-, q-Values |
| yes    | -         |              |

Fn Summary Table FnPg vs Fn FnSg vs Fn FnPgSg vs Fn FnPgSg vs FnPg FnSg vs FnPg FnPgSg vs FnSg Fn Coverage

| Protein | FnPgSg vs FnSg         |                      |          |          | Raw    |      | Normalized |          | Description                                           | Log <sub>2</sub> Ratios |    |    |   |   |   |   |
|---------|------------------------|----------------------|----------|----------|--------|------|------------|----------|-------------------------------------------------------|-------------------------|----|----|---|---|---|---|
|         | Log <sub>2</sub> Ratio | Log <sub>2</sub> Sum | q-Value  | p-Value  | FnPgSg | FnSg | FnPgSg     | FnSg     |                                                       | -6                      | -4 | -2 | 0 | 2 | 4 | 6 |
| FN1695  | 1.111                  | 9.736                | 1.35e-3  | 2.833e-3 | 43     | 19   | 49.1940    | 24.7307  | AAL93810.1  Probable quinovosaminephosphotransferae   |                         |    |    |   |   |   |   |
|         |                        |                      |          |          | 25     | 15   | 36.6450    | 15.0000  |                                                       |                         |    |    |   |   |   |   |
| FN1696  | -0.387                 | 15.295               | 3.749e-3 | 1.021e-2 | 163    | 161  | 186.4797   | 209.5603 | AAL93811.1  UDP-N-acetylglucosamine 4,6-dehydratase   |                         |    |    |   |   |   |   |
|         |                        |                      |          |          | 112    | 249  | 164.1694   | 249.0000 |                                                       |                         |    |    |   |   |   |   |
| FN1697  | -0.430                 | 13.373               | 4.397e-3 | 1.269e-2 | 68     | 100  | 77.7952    | 130.1617 | AAL93812.1  Hypothetical protein                      |                         |    |    |   |   |   |   |
|         |                        |                      |          |          | 68     | 109  | 99.6743    | 109.0000 |                                                       |                         |    |    |   |   |   |   |
| FN1698  | -1.310                 | 14.499               | 5.128e-5 | 3.6e-5   | 78     | 183  | 89.2357    | 238.1958 | AAL93813.1  dTDP-4-dehydrorhamnose reductase          |                         |    |    |   |   |   |   |
|         |                        |                      |          |          | 71     | 241  | 104.0717   | 241.0000 |                                                       |                         |    |    |   |   |   |   |
| FN1700  |                        |                      |          |          |        | 3    |            | 3.9048   | AAL93815.1  Hypothetical protein                      |                         |    |    |   |   |   |   |
|         |                        |                      |          |          |        |      |            |          |                                                       |                         |    |    |   |   |   |   |
| FN1701  | -1.038                 | 10.946               | 1.166e-3 | 2.371e-3 | 26     | 44   | 29.7452    | 57.2711  | AAL93816.1  ABC transporter ATP-binding protein       |                         |    |    |   |   |   |   |
|         |                        |                      |          |          | 22     | 70   | 32.2476    | 70.0000  |                                                       |                         |    |    |   |   |   |   |
| FN1703  | -0.907                 | 13.890               | 1.637e-3 | 3.608e-3 | 74     | 144  | 84.6595    | 187.4328 | AAL93818.1  ADP-L-glycero-D-manno-heptose-6-epimerase |                         |    |    |   |   |   |   |
|         |                        |                      |          |          | 65     | 150  | 95.2769    | 150.0000 |                                                       |                         |    |    |   |   |   |   |
| FN1704  | -0.700                 | 6.703                |          |          | 7      | 10   | 8.0083     | 13.0162  | AAL93819.1  Serine protease                           |                         |    |    |   |   |   |   |
|         |                        |                      |          |          |        | 13   |            | 13.0000  |                                                       |                         |    |    |   |   |   |   |
| FN1708  | 0.145                  | 18.177               | 1.074e-3 | 2.131e-3 | 488    | 406  | 558.2951   | 528.4563 | AAL93823.1  Polyribonucleotide nucleotidyltransferase |                         |    |    |   |   |   |   |
|         |                        |                      |          |          | 400    | 507  | 586.3194   | 507.0000 |                                                       |                         |    |    |   |   |   |   |
| FN1711  |                        |                      |          |          | 3      |      | 3.4321     |          | AAL93826.1  Methyltransferase                         |                         |    |    |   |   |   |   |
|         |                        |                      |          |          | 3      |      | 4.3974     |          |                                                       |                         |    |    |   |   |   |   |
| FN1713  |                        |                      |          |          |        | 14   |            | 18.2226  | AAL93828.1  tRNA (Uracil-5-) - methyltransferase      |                         |    |    |   |   |   |   |
|         |                        |                      |          |          |        | 20   |            | 20.0000  |                                                       |                         |    |    |   |   |   |   |
| FN1715  |                        |                      |          |          |        | 9    |            | 11.7145  | AAL93830.1  ATPase                                    |                         |    |    |   |   |   |   |
|         |                        |                      |          |          |        | 9    |            | 9.0000   |                                                       |                         |    |    |   |   |   |   |
| FN1716  |                        |                      |          |          |        | 5    |            | 5.0000   | AAL93831.1  Hypothetical protein                      |                         |    |    |   |   |   |   |
|         |                        |                      |          |          |        |      |            |          |                                                       |                         |    |    |   |   |   |   |
| FN1717  | 0.071                  | 7.697                | 1.593e-1 | 8.197e-1 | 13     | 7    | 14.8726    | 9.1113   | AAL93832.1  NAD-dependent DNA ligase                  |                         |    |    |   |   |   |   |
|         |                        |                      |          |          | 10     | 19   | 14.6580    | 19.0000  |                                                       |                         |    |    |   |   |   |   |
| FN1718  | 0.131                  | 17.212               | 1.109e-2 | 3.973e-2 | 372    | 284  | 425.5856   | 369.6591 | AAL93833.1  Protein translocase subunit secA          |                         |    |    |   |   |   |   |
|         |                        |                      |          |          | 266    | 375  | 389.9024   | 375.0000 |                                                       |                         |    |    |   |   |   |   |
| FN1719  | -0.707                 | 16.963               | 6.007e-3 | 1.898e-2 | 261    | 405  | 298.5964   | 527.1547 | AAL93834.1  Hypothetical protein                      |                         |    |    |   |   |   |   |
|         |                        |                      |          |          | 178    | 386  | 260.9122   | 386.0000 |                                                       |                         |    |    |   |   |   |   |

Show detected proteins only  
 Show all proteins  
 Filter by category:

Proteins found:  
 1344

Enter (or paste) list of ORFs

Test
Cutoff

| Signif | Direction | Applies To   |
|--------|-----------|--------------|
| yes    | +         | ratios, bars |
| no     | n/a       | bars         |
| yes    | -         | ratios, bars |
| yes    | +         | p-, q-Values |
| yes    | -         | p-, q-Values |

Fn Summary Table FnPg vs Fn FnSg vs Fn FnPgSg vs Fn FnPgSg vs FnPg FnSg vs FnPg FnPgSg vs FnSg Fn Coverage

| Protein | FnPgSg vs FnSg         |                      |          |          | Raw    |      | Normalized |          | Description                                         | Log <sub>2</sub> Ratios |    |    |   |   |   |   |
|---------|------------------------|----------------------|----------|----------|--------|------|------------|----------|-----------------------------------------------------|-------------------------|----|----|---|---|---|---|
|         | Log <sub>2</sub> Ratio | Log <sub>2</sub> Sum | q-Value  | p-Value  | FnPgSg | FnSg | FnPgSg     | FnSg     |                                                     | -6                      | -4 | -2 | 0 | 2 | 4 | 6 |
| FN1722  |                        |                      |          |          |        | 3    |            | 3.9048   | AAL93837.1  Glucose inhibited division protein B    |                         |    |    |   |   |   |   |
|         |                        |                      |          |          |        | 4    |            | 4.0000   |                                                     |                         |    |    |   |   |   |   |
| FN1723  | 0.386                  | 12.797               | 1.054e-2 | 3.733e-2 | 93     | 65   | 106.3964   | 84.6051  | AAL93838.1  Glucose inhibited division protein A    |                         |    |    |   |   |   |   |
|         |                        |                      |          |          | 59     | 63   | 86.4821    | 63.0000  |                                                     |                         |    |    |   |   |   |   |
| FN1724  | -1.586                 | 8.096                | 2.555e-2 | 1.04e-1  | 9      | 11   | 10.2964    | 14.3178  | AAL93839.1  Potassium uptake protein KtrA           |                         |    |    |   |   |   |   |
|         |                        |                      |          |          | 6      | 43   | 8.7948     | 43.0000  |                                                     |                         |    |    |   |   |   |   |
| FN1727  | -0.318                 | 5.086                |          |          | 4      | 5    | 4.5762     | 6.5081   | AAL93842.1  Chloride channel protein                |                         |    |    |   |   |   |   |
|         |                        |                      |          |          | 4      |      | 5.8632     |          |                                                     |                         |    |    |   |   |   |   |
| FN1728  | -0.573                 | 5.985                | 1.109e-3 | 2.227e-3 | 5      | 8    | 5.7202     | 10.4129  | AAL93843.1  Pyrrolidone-carboxylate peptidase       |                         |    |    |   |   |   |   |
|         |                        |                      |          |          | 5      | 9    | 7.3290     | 9.0000   |                                                     |                         |    |    |   |   |   |   |
| FN1730  | -1.565                 | 7.838                |          |          |        | 20   |            | 26.0323  | AAL93845.1  Para-aminobenzoate synthase component I |                         |    |    |   |   |   |   |
|         |                        |                      |          |          | 6      | 26   | 8.7948     | 26.0000  |                                                     |                         |    |    |   |   |   |   |
| FN1731  | 1.407                  | 6.982                |          |          | 16     | 6    | 18.3048    | 7.8097   | AAL93846.1  Anthranilate synthase component II      |                         |    |    |   |   |   |   |
|         |                        |                      |          |          |        | 6    |            | 6.0000   |                                                     |                         |    |    |   |   |   |   |
| FN1732  | -1.486                 | 10.431               | 6.47e-4  | 1.081e-3 | 26     | 41   | 29.7452    | 53.3663  | AAL93847.1  Hypothetical protein                    |                         |    |    |   |   |   |   |
|         |                        |                      |          |          | 10     | 71   | 14.6580    | 71.0000  |                                                     |                         |    |    |   |   |   |   |
| FN1733  |                        |                      |          |          |        | 9    |            | 11.7145  | AAL93848.1  V-type sodium ATP synthase subunit D    |                         |    |    |   |   |   |   |
|         |                        |                      |          |          |        | 22   |            | 22.0000  |                                                     |                         |    |    |   |   |   |   |
| FN1734  | -0.453                 | 14.675               | 6.476e-3 | 2.077e-2 | 102    | 151  | 116.6928   | 196.5441 | AAL93849.1  V-type sodium ATP synthase subunit B    |                         |    |    |   |   |   |   |
|         |                        |                      |          |          | 109    | 182  | 159.7720   | 182.0000 |                                                     |                         |    |    |   |   |   |   |
| FN1735  | -2.255                 | 13.388               | 7.896e-5 | 6.329e-5 | 38     | 184  | 43.4738    | 239.4974 | AAL93850.1  V-type sodium ATP synthase subunit A    |                         |    |    |   |   |   |   |
|         |                        |                      |          |          | 35     | 213  | 51.3030    | 213.0000 |                                                     |                         |    |    |   |   |   |   |
| FN1736  | -2.650                 | 9.033                | 1.827e-5 | 7.893e-6 | 7      | 42   | 8.0083     | 54.6679  | AAL93851.1  V-type sodium ATP synthase subunit A    |                         |    |    |   |   |   |   |
|         |                        |                      |          |          | 7      | 60   | 10.2606    | 60.0000  |                                                     |                         |    |    |   |   |   |   |
| FN1737  |                        |                      |          |          |        | 12   |            | 15.6194  | AAL93852.1  V-type sodium ATP synthase subunit G    |                         |    |    |   |   |   |   |
|         |                        |                      |          |          |        | 16   |            | 16.0000  |                                                     |                         |    |    |   |   |   |   |
| FN1738  | -2.531                 | 10.361               | 1.929e-4 | 2.079e-4 | 11     | 61   | 12.5845    | 79.3986  | AAL93853.1  V-type sodium ATP synthase subunit C    |                         |    |    |   |   |   |   |
|         |                        |                      |          |          | 12     | 95   | 17.5896    | 95.0000  |                                                     |                         |    |    |   |   |   |   |
| FN1739  | 1.565                  | 6.969                |          |          | 17     | 5    | 19.4488    | 6.5081   | AAL93854.1  V-type sodium ATP synthase subunit E    |                         |    |    |   |   |   |   |
|         |                        |                      |          |          | 13     |      | 19.0554    |          |                                                     |                         |    |    |   |   |   |   |
| FN1740  |                        |                      |          |          |        |      |            |          | AAL93855.1  V-type sodium ATP synthase subunit K    |                         |    |    |   |   |   |   |
|         |                        |                      |          |          |        | 114  |            | 114.0000 |                                                     |                         |    |    |   |   |   |   |

Show detected proteins only  
 Show all proteins  
 Filter by category:

Proteins found: 1344

Enter (or paste) list of ORFs

Find ORFs

Test Cutoff

q-Value

p-Value

.005

| Signif | Direction | Applies To   |
|--------|-----------|--------------|
| yes    | +         | ratios, bars |
| no     | n/a       | bars         |
| yes    | -         | ratios, bars |
| yes    | +         | p-, q-Values |
| yes    | -         |              |

Dot Plots Dot Plots

Fn Summary Table FnPg vs Fn FnSg vs Fn FnPgSg vs Fn FnPgSg vs FnPg FnSg vs FnPg FnPgSg vs FnSg Fn Coverage

| Protein | FnPgSg vs FnSg         |                      |          |          | Raw    |      | Normalized |           | Description                                                      | Log <sub>2</sub> Ratios |    |    |   |   |   |   |
|---------|------------------------|----------------------|----------|----------|--------|------|------------|-----------|------------------------------------------------------------------|-------------------------|----|----|---|---|---|---|
|         | Log <sub>2</sub> Ratio | Log <sub>2</sub> Sum | q-Value  | p-Value  | FnPgSg | FnSg | FnPgSg     | FnSg      |                                                                  | -6                      | -4 | -2 | 0 | 2 | 4 | 6 |
| FN1741  | -2.249                 | 8.187                | 3.242e-7 | 2.611e-8 | 6      | 28   | 6.8643     | 36.4453   | AAL93856.1  V-type sodium ATP synthase subunit I                 |                         |    |    |   |   |   |   |
|         |                        |                      |          |          | 6      | 38   | 8.7948     | 38.0000   |                                                                  |                         |    |    |   |   |   |   |
| FN1745  | -1.390                 | 7.823                | 8.096e-4 | 1.464e-3 | 6      | 19   | 6.8643     | 24.7307   | AAL93860.1  Cystathionine gamma-synthase                         |                         |    |    |   |   |   |   |
|         |                        |                      |          |          | 8      | 24   | 11.7264    | 24.0000   |                                                                  |                         |    |    |   |   |   |   |
| FN1746  |                        |                      |          |          |        | 8    |            | 10.4129   | AAL93861.1  Cystathionine beta-lyase                             |                         |    |    |   |   |   |   |
|         |                        |                      |          |          |        | 15   |            | 15.0000   |                                                                  |                         |    |    |   |   |   |   |
| FN1752  |                        |                      |          |          | 3      |      | 3.4321     |           | AAL93867.1  Regulatory protein TENI                              |                         |    |    |   |   |   |   |
|         |                        |                      |          |          |        |      |            |           |                                                                  |                         |    |    |   |   |   |   |
| FN1762  |                        |                      |          |          |        | 4    |            | 5.2065    | AAL93875.1  Protein yaaA                                         |                         |    |    |   |   |   |   |
|         |                        |                      |          |          |        |      |            |           |                                                                  |                         |    |    |   |   |   |   |
| FN1763  | -2.251                 | 9.999                |          |          |        | 55   |            | 71.5889   | AAL93876.1  Hypothetical cytosolic protein                       |                         |    |    |   |   |   |   |
|         |                        |                      |          |          | 10     | 68   | 14.6580    | 68.0000   |                                                                  |                         |    |    |   |   |   |   |
| FN1764  | -1.186                 | 24.584               | 2.024e-7 | 1.149e-8 | 2954   | 5881 | 3379.5159  | 7654.8070 | AAL93877.1  Enolase                                              |                         |    |    |   |   |   |   |
|         |                        |                      |          |          | 2231   | 7477 | 3270.1967  | 7477.0000 |                                                                  |                         |    |    |   |   |   |   |
| FN1765  | 0.041                  | 18.838               | 1.158e-1 | 5.666e-1 | 563    | 535  | 644.0987   | 696.3649  | AAL93878.1  Pyruvate kinase                                      |                         |    |    |   |   |   |   |
|         |                        |                      |          |          | 508    | 653  | 744.6257   | 653.0000  |                                                                  |                         |    |    |   |   |   |   |
| FN1780  | 1.150                  | 8.735                | 1.46e-3  | 3.122e-3 | 23     | 9    | 26.3131    | 11.7145   | AAL93879.1  Hypothetical protein                                 |                         |    |    |   |   |   |   |
|         |                        |                      |          |          | 24     | 16   | 35.1792    | 16.0000   |                                                                  |                         |    |    |   |   |   |   |
| FN1781  | 0.095                  | 18.183               | 5.114e-2 | 2.286e-1 | 496    | 374  | 567.4475   | 486.8046  | AAL93880.1  LytB protein                                         |                         |    |    |   |   |   |   |
|         |                        |                      |          |          | 382    | 569  | 559.9351   | 569.0000  |                                                                  |                         |    |    |   |   |   |   |
| FN1783  |                        |                      |          |          |        | 8    |            | 8.0000    | AAL93882.1  Ethanolamine utilization protein eutJ                |                         |    |    |   |   |   |   |
|         |                        |                      |          |          |        |      |            |           |                                                                  |                         |    |    |   |   |   |   |
| FN1784  | -1.616                 | 7.363                |          |          |        | 13   |            | 16.9210   | AAL93883.1  unknown                                              |                         |    |    |   |   |   |   |
|         |                        |                      |          |          | 5      | 28   | 7.3290     | 28.0000   |                                                                  |                         |    |    |   |   |   |   |
| FN1785  | 1.746                  | 9.425                |          |          | 25     | 11   | 28.6012    | 14.3178   | AAL93884.1  Hypothetical protein                                 |                         |    |    |   |   |   |   |
|         |                        |                      |          |          | 46     |      | 67.4267    |           |                                                                  |                         |    |    |   |   |   |   |
| FN1786  | 0.549                  | 11.463               | 6.926e-4 | 1.182e-3 | 56     | 36   | 64.0667    | 46.8582   | AAL93885.1  ADP-heptose synthase                                 |                         |    |    |   |   |   |   |
|         |                        |                      |          |          | 44     | 41   | 64.4951    | 41.0000   |                                                                  |                         |    |    |   |   |   |   |
| FN1787  | 1.323                  | 9.137                |          |          | 40     |      | 45.7619    |           | AAL93886.1  Tetratricopeptide repeat family protein              |                         |    |    |   |   |   |   |
|         |                        |                      |          |          | 20     | 15   | 29.3160    | 15.0000   |                                                                  |                         |    |    |   |   |   |   |
| FN1788  | 0.638                  | 8.890                | 6.02e-3  | 1.903e-2 | 27     | 13   | 30.8893    | 16.9210   | AAL93887.1  2C-methyl-D-erythritol 2,4-cyclodiphosphate synthase |                         |    |    |   |   |   |   |
|         |                        |                      |          |          | 16     | 18   | 23.4528    | 18.0000   |                                                                  |                         |    |    |   |   |   |   |

Show detected proteins only  
 Show all proteins  
 Filter by category:

Proteins found: 1344

Test Cutoff

| Signif | Direction | Applies To   |
|--------|-----------|--------------|
| yes    | +         | ratios, bars |
| no     | n/a       | bars         |
| yes    | -         | ratios, bars |
| yes    | +         | p-, q-Values |
| yes    | -         |              |

Fn Summary Table FnPg vs Fn FnSg vs Fn FnPgSg vs Fn FnPgSg vs FnPg FnSg vs FnPg FnPgSg vs FnSg Fn Coverage

| Protein | FnPgSg vs FnSg         |                      |          |          | Raw    |      | Normalized |           | Description                                                              | Log <sub>2</sub> Ratios |    |    |   |   |   |   |
|---------|------------------------|----------------------|----------|----------|--------|------|------------|-----------|--------------------------------------------------------------------------|-------------------------|----|----|---|---|---|---|
|         | Log <sub>2</sub> Ratio | Log <sub>2</sub> Sum | q-Value  | p-Value  | FnPgSg | FnSg | FnPgSg     | FnSg      |                                                                          | -6                      | -4 | -2 | 0 | 2 | 4 | 6 |
| FN1790  | -2.203                 | 8.995                | 1.027e-2 | 3.619e-2 | 12     | 23   | 13.7286    | 29.9372   | AAL93889.1  Cob(I)alamin adenosyltransferase                             |                         |    |    |   |   |   |   |
|         |                        |                      |          |          | 5      | 67   | 7.3290     | 67.0000   |                                                                          |                         |    |    |   |   |   |   |
| FN1791  |                        |                      |          |          |        |      |            |           | AAL93890.1  Mutator MutT protein                                         |                         |    |    |   |   |   |   |
|         |                        |                      |          |          |        |      |            |           |                                                                          |                         |    |    |   |   |   |   |
| FN1792  | 2.306                  | 24.232               | 4.189e-5 | 2.723e-5 | 8681   | 1257 | 9931.4752  | 1636.1320 | AAL93891.1  Hypothetical protein                                         |                         |    |    |   |   |   |   |
|         |                        |                      |          |          | 6695   | 2356 | 9813.5217  | 2356.0000 |                                                                          |                         |    |    |   |   |   |   |
| FN1793  | -1.272                 | 14.641               | 7.563e-5 | 5.977e-5 | 85     | 201  | 97.2440    | 261.6249  | AAL93892.1  Phosphoenolpyruvate-protein phosphotransferase               |                         |    |    |   |   |   |   |
|         |                        |                      |          |          | 74     | 235  | 108.4691   | 235.0000  |                                                                          |                         |    |    |   |   |   |   |
| FN1794  | 1.814                  | 12.863               | 2.338e-3 | 5.629e-3 | 110    | 50   | 125.8452   | 65.0808   | AAL93893.1  Phosphocarrier protein HPr                                   |                         |    |    |   |   |   |   |
|         |                        |                      |          |          | 135    | 27   | 197.8828   | 27.0000   |                                                                          |                         |    |    |   |   |   |   |
| FN1795  |                        |                      |          |          |        |      |            |           | AAL93894.1  Hypothetical protein                                         |                         |    |    |   |   |   |   |
|         |                        |                      |          |          |        |      |            |           |                                                                          |                         |    |    |   |   |   |   |
| FN1796  |                        |                      |          |          |        |      |            |           | AAL93895.1  unknown                                                      |                         |    |    |   |   |   |   |
|         |                        |                      |          |          |        |      |            |           |                                                                          |                         |    |    |   |   |   |   |
| FN1797  | -1.268                 | 11.275               | 1.183e-3 | 2.414e-3 | 33     | 68   | 37.7536    | 88.5099   | AAL93896.1  Spermidine/putrescine transport ATP-binding protein potA     |                         |    |    |   |   |   |   |
|         |                        |                      |          |          | 18     | 66   | 26.3844    | 66.0000   |                                                                          |                         |    |    |   |   |   |   |
| FN1798  | -0.219                 | 5.558                | 9.413e-3 | 3.258e-2 | 6      | 6    | 6.8643     | 7.8097    | AAL93897.1  Spermidine/putrescine transport system permease protein potB |                         |    |    |   |   |   |   |
|         |                        |                      |          |          | 4      | 7    | 5.8632     | 7.0000    |                                                                          |                         |    |    |   |   |   |   |
| FN1800  | -0.269                 | 15.271               | 4.052e-2 | 1.758e-1 | 177    | 141  | 202.4964   | 183.5279  | AAL93899.1  Peptidyl-prolyl cis-trans isomerase                          |                         |    |    |   |   |   |   |
|         |                        |                      |          |          | 109    | 253  | 159.7720   | 253.0000  |                                                                          |                         |    |    |   |   |   |   |
| FN1801  | -1.701                 | 7.704                |          |          | 7      | 20   | 8.0083     | 26.0323   | AAL93900.1  Sodium/glutamate symport carrier protein                     |                         |    |    |   |   |   |   |
|         |                        |                      |          |          |        |      |            |           |                                                                          |                         |    |    |   |   |   |   |
| FN1803  | 1.345                  | 7.962                |          |          | 22     | 6    | 25.1690    | 7.8097    | AAL93902.1  Transcriptional regulator, TetR family                       |                         |    |    |   |   |   |   |
|         |                        |                      |          |          |        |      |            |           |                                                                          |                         |    |    |   |   |   |   |
| FN1804  |                        |                      |          |          |        |      |            |           | AAL93903.1  Aminoacyl-histidine dipeptidase                              |                         |    |    |   |   |   |   |
|         |                        |                      |          |          |        |      |            |           |                                                                          |                         |    |    |   |   |   |   |
| FN1807  | 1.109                  | 16.659               | 1.354e-4 | 1.286e-4 | 407    | 186  | 465.6273   | 242.1007  | AAL93906.1  Hypothetical protein                                         |                         |    |    |   |   |   |   |
|         |                        |                      |          |          | 327    | 196  | 479.3161   | 196.0000  |                                                                          |                         |    |    |   |   |   |   |
| FN1808  | 2.154                  | 8.084                |          |          | 30     | 6    | 34.3214    | 7.8097    | AAL93907.1  Hypothetical protein                                         |                         |    |    |   |   |   |   |
|         |                        |                      |          |          | 24     |      | 35.1792    |           |                                                                          |                         |    |    |   |   |   |   |
| FN1809  | 0.705                  | 8.891                | 8.761e-3 | 2.993e-2 | 23     | 17   | 26.3131    | 22.1275   | AAL93908.1  Iron/zinc/copper-binding protein                             |                         |    |    |   |   |   |   |
|         |                        |                      |          |          | 20     | 12   | 29.3160    | 12.0000   |                                                                          |                         |    |    |   |   |   |   |

Show detected proteins only  
 Show all proteins  
 Filter by category:

Proteins found: 1344

Enter (or paste) list of ORFs

Find ORFs

Test Cutoff

q-Value p-Value

.005

| Signif | Direction | Applies To   |
|--------|-----------|--------------|
| yes    | +         | ratios, bars |
| no     | n/a       | bars         |
| yes    | -         | ratios, bars |
| yes    | +         | p-, q-Values |
| yes    | -         | p-, q-Values |

Dot Plots Dot Plots



Fn Summary Table FnPg vs Fn FnSg vs Fn FnPgSg vs Fn FnPgSg vs FnPg FnSg vs FnPg FnPgSg vs FnSg Fn Coverage

| Protein | FnPgSg vs FnSg         |                      |          |          | Raw    |      | Normalized |          | Description                                                     | Log <sub>2</sub> Ratios |    |    |   |   |   |   |
|---------|------------------------|----------------------|----------|----------|--------|------|------------|----------|-----------------------------------------------------------------|-------------------------|----|----|---|---|---|---|
|         | Log <sub>2</sub> Ratio | Log <sub>2</sub> Sum | q-Value  | p-Value  | FnPgSg | FnSg | FnPgSg     | FnSg     |                                                                 | -6                      | -4 | -2 | 0 | 2 | 4 | 6 |
| FN1811  | 0.589                  | 9.072                | 2.171e-2 | 8.683e-2 | 19     | 16   | 21.7369    | 20.8259  | AAL93910.1  Manganese transport system ATP-binding protein mntA |                         |    |    |   |   |   |   |
|         |                        |                      |          |          | 24     | 17   | 35.1792    | 17.0000  |                                                                 |                         |    |    |   |   |   |   |
| FN1812  | 1.579                  | 12.225               | 6.106e-4 | 9.948e-4 | 95     | 30   | 108.6845   | 39.0485  | AAL93911.1  Manganese-binding protein                           |                         |    |    |   |   |   |   |
|         |                        |                      |          |          | 89     | 41   | 130.4561   | 41.0000  |                                                                 |                         |    |    |   |   |   |   |
| FN1813  | 1.152                  | 7.295                | 7.008e-6 | 1.596e-6 | 16     | 6    | 18.3048    | 7.8097   | AAL93912.1  Manganese-binding protein                           |                         |    |    |   |   |   |   |
|         |                        |                      |          |          | 13     | 9    | 19.0554    | 9.0000   |                                                                 |                         |    |    |   |   |   |   |
| FN1814  | 0.423                  | 7.184                |          |          | 18     | 8    | 20.5929    | 10.4129  | AAL93913.1  Hypothetical protein                                |                         |    |    |   |   |   |   |
|         |                        |                      |          |          | 5      |      | 7.3290     |          |                                                                 |                         |    |    |   |   |   |   |
| FN1816  | -1.868                 | 7.746                |          |          | 7      |      | 8.0083     |          | AAL93915.1  unknown                                             |                         |    |    |   |   |   |   |
|         |                        |                      |          |          | 5      | 28   | 7.3290     | 28.0000  |                                                                 |                         |    |    |   |   |   |   |
| FN1817  | 0.908                  | 6.078                |          |          | 12     |      | 13.7286    |          | AAL93916.1  Hemolysin                                           |                         |    |    |   |   |   |   |
|         |                        |                      |          |          | 6      | 6    | 8.7948     | 6.0000   |                                                                 |                         |    |    |   |   |   |   |
| FN1825  |                        |                      |          |          | 10     |      | 11.4405    |          | AAL93924.1  Hypothetical protein                                |                         |    |    |   |   |   |   |
|         |                        |                      |          |          | 7      |      | 10.2606    |          |                                                                 |                         |    |    |   |   |   |   |
| FN1826  | 0.705                  | 10.903               | 1.813e-4 | 1.911e-4 | 49     | 25   | 56.0583    | 32.5404  | AAL93925.1  Protease                                            |                         |    |    |   |   |   |   |
|         |                        |                      |          |          | 38     | 36   | 55.7003    | 36.0000  |                                                                 |                         |    |    |   |   |   |   |
| FN1827  | -1.457                 | 11.802               | 6.894e-4 | 1.175e-3 | 31     | 83   | 35.4655    | 108.0342 | AAL93926.1  Replicative DNA helicase                            |                         |    |    |   |   |   |   |
|         |                        |                      |          |          | 25     | 90   | 36.6450    | 90.0000  |                                                                 |                         |    |    |   |   |   |   |
| FN1828  | 0.327                  | 10.700               | 1.534e-2 | 5.792e-2 | 35     | 26   | 40.0417    | 33.8420  | AAL93927.1  LSU ribosomal protein L9P                           |                         |    |    |   |   |   |   |
|         |                        |                      |          |          | 35     | 39   | 51.3030    | 39.0000  |                                                                 |                         |    |    |   |   |   |   |
| FN1830  | -1.796                 | 10.007               | 3.083e-3 | 7.944e-3 | 16     | 55   | 18.3048    | 71.5889  | AAL93929.1  DNA polymerase III subunits gamma and tau           |                         |    |    |   |   |   |   |
|         |                        |                      |          |          | 11     | 48   | 16.1238    | 48.0000  |                                                                 |                         |    |    |   |   |   |   |
| FN1831  | -1.561                 | 12.336               | 2.961e-4 | 3.795e-4 | 45     | 93   | 51.4821    | 121.0503 | AAL93930.1  Nitrogen assimilation regulatory protein            |                         |    |    |   |   |   |   |
|         |                        |                      |          |          | 22     | 126  | 32.2476    | 126.0000 |                                                                 |                         |    |    |   |   |   |   |
| FN1832  | -0.771                 | 5.159                |          |          | 4      | 6    | 4.5762     | 7.8097   | AAL93931.1  TonB protein                                        |                         |    |    |   |   |   |   |
|         |                        |                      |          |          |        |      |            |          |                                                                 |                         |    |    |   |   |   |   |
| FN1833  |                        |                      |          |          | 24     |      | 27.4571    |          | AAL93932.1  Biopolymer transport exbD protein                   |                         |    |    |   |   |   |   |
|         |                        |                      |          |          | 15     |      | 21.9870    |          |                                                                 |                         |    |    |   |   |   |   |
| FN1834  | 0.636                  | 9.903                | 4.62e-3  | 1.356e-2 | 29     | 22   | 33.1774    | 28.6356  | AAL93933.1  Biopolymer transport exbB protein                   |                         |    |    |   |   |   |   |
|         |                        |                      |          |          | 30     | 21   | 43.9740    | 21.0000  |                                                                 |                         |    |    |   |   |   |   |
| FN1836  | 0.556                  | 12.323               | 9.94e-4  | 1.922e-3 | 80     | 40   | 91.5238    | 52.0647  | AAL93935.1  Tetratricopeptide repeat family protein             |                         |    |    |   |   |   |   |
|         |                        |                      |          |          | 56     | 66   | 82.0847    | 66.0000  |                                                                 |                         |    |    |   |   |   |   |

Show detected proteins only  
 Show all proteins  
 Filter by category:

Proteins found: 1344

Test Cutoff

| Signif | Direction | Applies To   |
|--------|-----------|--------------|
| yes    | +         | ratios, bars |
| no     | n/a       | bars         |
| yes    | -         | ratios, bars |
| yes    | +         | p-, q-Values |
| yes    | -         |              |

Fn Summary Table FnPg vs Fn FnSg vs Fn FnPgSg vs Fn FnPgSg vs FnPg FnSg vs FnPg FnPgSg vs FnSg Fn Coverage

| Protein | FnPgSg vs FnSg         |                      |          |          | Raw    |      | Normalized |           | Description                                                 | Log <sub>2</sub> Ratios |    |    |   |   |   |   |
|---------|------------------------|----------------------|----------|----------|--------|------|------------|-----------|-------------------------------------------------------------|-------------------------|----|----|---|---|---|---|
|         | Log <sub>2</sub> Ratio | Log <sub>2</sub> Sum | q-Value  | p-Value  | FnPgSg | FnSg | FnPgSg     | FnSg      |                                                             | -6                      | -4 | -2 | 0 | 2 | 4 | 6 |
| FN1838  |                        |                      |          |          | 11     |      | 12.5845    |           | AAL93937.1  Glycerol uptake facilitator protein             |                         |    |    |   |   |   |   |
| FN1839  | -1.429                 | 18.508               | 3.099e-3 | 7.996e-3 | 284    | 914  | 324.9095   | 1189.6775 | AAL93938.1  Glycerol kinase                                 |                         |    |    |   |   |   |   |
|         |                        |                      |          |          | 286    | 814  | 419.2184   | 814.0000  |                                                             |                         |    |    |   |   |   |   |
| FN1840  | 0.451                  | 12.937               | 7.111e-7 | 7.961e-8 | 90     | 58   | 102.9643   | 75.4938   | AAL93939.1  Dihydroxyacetone kinase                         |                         |    |    |   |   |   |   |
|         |                        |                      |          |          | 71     | 76   | 104.0717   | 76.0000   |                                                             |                         |    |    |   |   |   |   |
| FN1841  | 0.611                  | 7.356                | 1.443e-2 | 5.393e-2 | 11     | 9    | 12.5845    | 11.7145   | AAL93940.1  Dihydroxyacetone kinase                         |                         |    |    |   |   |   |   |
|         |                        |                      |          |          | 13     | 9    | 19.0554    | 9.0000    |                                                             |                         |    |    |   |   |   |   |
| FN1842  | 0.941                  | 10.664               | 1.201e-3 | 2.46e-3  | 54     | 17   | 61.7786    | 22.1275   | AAL93941.1  Dihydroxyacetone kinase phosphotransfer protein |                         |    |    |   |   |   |   |
|         |                        |                      |          |          | 34     | 36   | 49.8372    | 36.0000   |                                                             |                         |    |    |   |   |   |   |
| FN1844  |                        |                      |          |          |        | 8    |            | 10.4129   | AAL93943.1  Ketoacyl reductase hetN                         |                         |    |    |   |   |   |   |
| FN1847  |                        |                      |          |          |        |      |            | 16        | AAL93946.1  DTDP-4-dehydrorhamnose 3,5-epimerase            |                         |    |    |   |   |   |   |
|         |                        |                      |          |          |        |      |            | 23        |                                                             | 23.0000                 |    |    |   |   |   |   |
| FN1848  |                        |                      |          |          | 4      |      | 5.8632     |           | AAL93947.1  Metal dependent hydrolase                       |                         |    |    |   |   |   |   |
| FN1849  | -2.851                 | 7.239                |          |          | 4      | 20   | 4.5762     | 26.0323   | AAL93948.1  Coenzyme F390 synthetase                        |                         |    |    |   |   |   |   |
|         |                        |                      |          |          |        |      |            | 40.0000   |                                                             |                         |    |    |   |   |   |   |
| FN1850  |                        |                      |          |          |        | 25   |            | 32.5404   | AAL93949.1  3-oxoacyl-[acyl-carrier-protein] synthase III   |                         |    |    |   |   |   |   |
|         |                        |                      |          |          |        |      |            | 66.0000   |                                                             |                         |    |    |   |   |   |   |
| FN1851  | -1.725                 | 12.918               | 1.134e-4 | 1.016e-4 | 41     | 129  | 46.9059    | 167.9085  | AAL93950.1  Ribonuclease PH                                 |                         |    |    |   |   |   |   |
|         |                        |                      |          |          | 34     | 152  | 49.8372    | 152.0000  |                                                             |                         |    |    |   |   |   |   |
| FN1852  | 0.863                  | 10.305               | 1.141e-2 | 4.112e-2 | 39     | 29   | 44.6178    | 37.7469   | AAL93951.1  unknown                                         |                         |    |    |   |   |   |   |
|         |                        |                      |          |          | 35     | 15   | 51.3030    | 15.0000   |                                                             |                         |    |    |   |   |   |   |
| FN1853  | -0.862                 | 6.274                | 6.623e-4 | 1.114e-3 | 5      | 9    | 5.7202     | 11.7145   | AAL93952.1  Methylaspartate mutase                          |                         |    |    |   |   |   |   |
|         |                        |                      |          |          | 5      | 12   | 7.3290     | 12.0000   |                                                             |                         |    |    |   |   |   |   |
| FN1854  | -0.229                 | 10.175               | 7.205e-2 | 3.355e-1 | 28     | 22   | 32.0333    | 28.6356   | AAL93953.1  Methylaspartate mutase                          |                         |    |    |   |   |   |   |
|         |                        |                      |          |          | 21     | 45   | 30.7818    | 45.0000   |                                                             |                         |    |    |   |   |   |   |
| FN1855  |                        |                      |          |          |        | 4    |            | 5.2065    | AAL93954.1  Methylaspartate mutase                          |                         |    |    |   |   |   |   |
|         |                        |                      |          |          |        |      |            | 7.0000    |                                                             |                         |    |    |   |   |   |   |
| FN1856  | -0.314                 | 23.555               | 3.291e-2 | 1.384e-1 | 2988   | 2497 | 3418.4135  | 3250.1366 | AAL93955.1  Butyrate-acetoacetate CoA-transferase subunit B |                         |    |    |   |   |   |   |
|         |                        |                      |          |          | 1963   | 4579 | 2877.3627  | 4579.0000 |                                                             |                         |    |    |   |   |   |   |

Show detected proteins only  
 Show all proteins  
 Filter by category:

Proteins found: 1344

Test Cutoff

| Signif | Direction | Applies To   |
|--------|-----------|--------------|
| yes    | +         | ratios, bars |
| no     | n/a       | bars         |
| yes    | -         | ratios, bars |
| yes    | +         | p-, q-Values |
| yes    | -         | p-, q-Values |

Fn Summary Table FnPg vs Fn FnSg vs Fn FnPgSg vs Fn FnPgSg vs FnPg FnSg vs FnPg FnPgSg vs FnSg Fn Coverage

| Protein | FnPgSg vs FnSg         |                      |          |          | Raw    |       | Normalized |                        | Description                                                                | Log <sub>2</sub> Ratios |    |    |   |   |   |   |
|---------|------------------------|----------------------|----------|----------|--------|-------|------------|------------------------|----------------------------------------------------------------------------|-------------------------|----|----|---|---|---|---|
|         | Log <sub>2</sub> Ratio | Log <sub>2</sub> Sum | q-Value  | p-Value  | FnPgSg | FnSg  | FnPgSg     | FnSg                   |                                                                            | -6                      | -4 | -2 | 0 | 2 | 4 | 6 |
| FN1857  | -0.789                 | 20.343               | 1.503e-4 | 1.488e-4 | 687    | 1208  | 785.9605   | 1572.3528              | AAL93956.1  Acetoacetate: butyrate/acetate coenzyme A transferase          |                         |    |    |   |   |   |   |
|         |                        |                      |          |          | 661    | 1459  | 968.8929   | 1459.0000              |                                                                            |                         |    |    |   |   |   |   |
| FN1858  |                        |                      |          |          | 92     |       | 105.2524   |                        | AAL93957.1  Short-chain fatty acids transporter                            |                         |    |    |   |   |   |   |
|         |                        |                      |          |          | 95     |       | 139.2509   |                        |                                                                            |                         |    |    |   |   |   |   |
| FN1859  | -3.063                 | 24.001               | 3.561e-3 | 9.549e-3 | 1120   | 11444 | 1281.3330  | 14895.699 <sub>n</sub> | AAL93958.1  Major outer membrane protein                                   |                         |    |    |   |   |   |   |
|         |                        |                      |          |          | 1060   | 8794  | 1553.7465  | 8794.0000              |                                                                            |                         |    |    |   |   |   |   |
| FN1860  | 0.744                  | 10.028               | 1.785e-2 | 6.91e-2  | 27     | 23    | 30.8893    | 29.9372                | AAL93959.1  NA+/H+ antiporter NHAC                                         |                         |    |    |   |   |   |   |
|         |                        |                      |          |          | 36     | 20    | 52.7687    | 20.0000                |                                                                            |                         |    |    |   |   |   |   |
| FN1862  | 1.252                  | 14.940               | 9.526e-6 | 2.674e-6 | 249    | 82    | 284.8678   | 106.7326               | AAL93961.1  L-beta-lysine 5,6-aminomutase beta subunit                     |                         |    |    |   |   |   |   |
|         |                        |                      |          |          | 179    | 123   | 262.3780   | 123.0000               |                                                                            |                         |    |    |   |   |   |   |
| FN1863  | 1.383                  | 17.094               | 5.912e-4 | 9.482e-4 | 483    | 183   | 552.5749   | 238.1958               | AAL93962.1  L-beta-lysine 5,6-aminomutase alpha subunit                    |                         |    |    |   |   |   |   |
|         |                        |                      |          |          | 447    | 225   | 655.2120   | 225.0000               |                                                                            |                         |    |    |   |   |   |   |
| FN1864  | 2.141                  | 6.927                | 9.178e-5 | 7.761e-5 | 20     | 5     | 22.8809    | 6.5081                 | AAL93963.1  DNA mismatch repair protein mutS                               |                         |    |    |   |   |   |   |
|         |                        |                      |          |          | 16     | 4     | 23.4528    | 4.0000                 |                                                                            |                         |    |    |   |   |   |   |
| FN1865  |                        |                      |          |          | 3      |       | 3.4321     |                        | AAL93964.1  Hypothetical protein                                           |                         |    |    |   |   |   |   |
|         |                        |                      |          |          |        |       |            |                        |                                                                            |                         |    |    |   |   |   |   |
| FN1866  | 0.850                  | 20.632               | 3.986e-4 | 5.542e-4 | 1420   | 722   | 1624.5473  | 939.7672               | AAL93965.1  Lysine 2,3-aminomutase                                         |                         |    |    |   |   |   |   |
|         |                        |                      |          |          | 1227   | 959   | 1798.5349  | 959.0000               |                                                                            |                         |    |    |   |   |   |   |
| FN1867  | 1.737                  | 18.853               | 2.003e-4 | 2.19e-4  | 1165   | 281   | 1332.8152  | 365.7543               | AAL93966.1  Zn-dependent alcohol dehydrogenases and related dehydrogenases |                         |    |    |   |   |   |   |
|         |                        |                      |          |          | 805    | 388   | 1179.9679  | 388.0000               |                                                                            |                         |    |    |   |   |   |   |
| FN1868  | 1.333                  | 13.850               | 3.369e-7 | 2.837e-8 | 168    | 60    | 192.2000   | 78.0970                | AAL93967.1  Hypothetical cytosolic protein                                 |                         |    |    |   |   |   |   |
|         |                        |                      |          |          | 132    | 75    | 193.4854   | 75.0000                |                                                                            |                         |    |    |   |   |   |   |
| FN1869  | 1.065                  | 14.174               | 1.298e-4 | 1.215e-4 | 167    | 63    | 191.0559   | 82.0018                | AAL93968.1  Hypothetical protein                                           |                         |    |    |   |   |   |   |
|         |                        |                      |          |          | 138    | 106   | 202.2802   | 106.0000               |                                                                            |                         |    |    |   |   |   |   |
| FN1870  |                        |                      |          |          | 3      |       | 4.3974     |                        | AAL93969.1  unknown                                                        |                         |    |    |   |   |   |   |
|         |                        |                      |          |          |        |       |            |                        |                                                                            |                         |    |    |   |   |   |   |
| FN1872  |                        |                      |          |          |        | 5     |            | 5.0000                 | AAL93971.1  unknown                                                        |                         |    |    |   |   |   |   |
|         |                        |                      |          |          |        |       |            |                        |                                                                            |                         |    |    |   |   |   |   |
| FN1873  | 2.177                  | 9.992                | 6.49e-4  | 1.085e-3 | 52     | 10    | 59.4905    | 13.0162                | AAL93972.1  Bis(5'-nucleosyl)-tetraphosphatase                             |                         |    |    |   |   |   |   |
|         |                        |                      |          |          | 52     | 17    | 76.2215    | 17.0000                |                                                                            |                         |    |    |   |   |   |   |
| FN1874  | 0.372                  | 9.103                | 7.796e-3 | 2.612e-2 | 21     | 14    | 24.0250    | 18.2226                | AAL93973.1  Ribose 5-phosphate isomerase                                   |                         |    |    |   |   |   |   |
|         |                        |                      |          |          | 20     | 23    | 29.3160    | 23.0000                |                                                                            |                         |    |    |   |   |   |   |

Show detected proteins only  
 Show all proteins  
 Filter by category:

Proteins found: 1344

Test Cutoff

| Signif | Direction | Applies To   |
|--------|-----------|--------------|
| yes    | +         | ratios, bars |
| no     | n/a       | bars         |
| yes    | -         | ratios, bars |
| yes    | +         | p-, q-Values |
| yes    | -         |              |

Fn Summary Table FnPg vs Fn FnSg vs Fn FnPgSg vs Fn FnPgSg vs FnPg FnSg vs FnPg FnPgSg vs FnSg Fn Coverage

| Protein | FnPgSg vs FnSg         |                      |          |          | Raw    |      | Normalized |          | Description                                                                 | Log <sub>2</sub> Ratios |    |    |   |   |   |   |
|---------|------------------------|----------------------|----------|----------|--------|------|------------|----------|-----------------------------------------------------------------------------|-------------------------|----|----|---|---|---|---|
|         | Log <sub>2</sub> Ratio | Log <sub>2</sub> Sum | q-Value  | p-Value  | FnPgSg | FnSg | FnPgSg     | FnSg     |                                                                             | -6                      | -4 | -2 | 0 | 2 | 4 | 6 |
| FN1875  | -0.642                 | 14.821               | 1.012e-3 | 1.968e-3 | 133    | 159  | 152.1583   | 206.9570 | AAL93974.1  Peptidyl-prolyl cis-trans isomerase                             |                         |    |    |   |   |   |   |
|         |                        |                      |          |          | 82     | 218  | 120.1955   | 218.0000 |                                                                             |                         |    |    |   |   |   |   |
| FN1877  |                        |                      |          |          | 7      |      | 8.0083     |          | AAL93976.1  Guanine-hypoxanthine permease                                   |                         |    |    |   |   |   |   |
|         |                        |                      |          |          |        |      |            |          |                                                                             |                         |    |    |   |   |   |   |
| FN1878  |                        |                      |          |          | 5      |      | 5.7202     |          | AAL93977.1  unknown                                                         |                         |    |    |   |   |   |   |
|         |                        |                      |          |          |        |      |            |          |                                                                             |                         |    |    |   |   |   |   |
| FN1879  |                        |                      |          |          | 25     |      | 28.6012    |          | AAL93978.1  SSU ribosomal protein S20P                                      |                         |    |    |   |   |   |   |
|         |                        |                      |          |          | 23     |      | 33.7134    |          |                                                                             |                         |    |    |   |   |   |   |
| FN1880  | -0.985                 | 12.674               | 2.301e-3 | 5.514e-3 | 62     | 101  | 70.9309    | 131.4633 | AAL93979.1  Oxygen-insensitive NAD(P)H nitroreductase                       |                         |    |    |   |   |   |   |
|         |                        |                      |          |          | 30     | 96   | 43.9740    | 96.0000  |                                                                             |                         |    |    |   |   |   |   |
| FN1881  | -0.944                 | 6.502                |          |          | 6      | 8    | 6.8643     | 10.4129  | AAL93980.1  Esterase                                                        |                         |    |    |   |   |   |   |
|         |                        |                      |          |          |        | 16   |            | 16.0000  |                                                                             |                         |    |    |   |   |   |   |
| FN1884  |                        |                      |          |          | 77     |      | 88.0916    |          | AAL93983.1  unknown                                                         |                         |    |    |   |   |   |   |
|         |                        |                      |          |          | 97     |      | 142.1825   |          |                                                                             |                         |    |    |   |   |   |   |
| FN1890  |                        |                      |          |          | 16     |      | 18.3048    |          | AAL93989.1  Hypothetical protein                                            |                         |    |    |   |   |   |   |
|         |                        |                      |          |          | 17     |      | 24.9186    |          |                                                                             |                         |    |    |   |   |   |   |
| FN1891  | -1.166                 | 9.074                | 2.615e-4 | 3.219e-4 | 13     | 25   | 14.8726    | 32.5404  | AAL93990.1  Glycerophosphoryl diester phosphodiesterase                     |                         |    |    |   |   |   |   |
|         |                        |                      |          |          | 11     | 37   | 16.1238    | 37.0000  |                                                                             |                         |    |    |   |   |   |   |
| FN1893  | -0.156                 | 17.514               | 5.534e-2 | 2.499e-1 | 309    | 336  | 353.5106   | 437.3432 | AAL93991.1  Fusobacterium outer membrane protein family                     |                         |    |    |   |   |   |   |
|         |                        |                      |          |          | 318    | 476  | 466.1240   | 476.0000 |                                                                             |                         |    |    |   |   |   |   |
| FN1895  |                        |                      |          |          | 5      |      | 5.7202     |          | AAL93994.1  Hypothetical protein                                            |                         |    |    |   |   |   |   |
|         |                        |                      |          |          |        |      |            |          |                                                                             |                         |    |    |   |   |   |   |
| FN1898  | -0.554                 | 11.271               | 1.264e-2 | 4.628e-2 | 32     | 38   | 36.6095    | 49.4614  | AAL93997.1  Sugar transport ATP-binding protein                             |                         |    |    |   |   |   |   |
|         |                        |                      |          |          | 31     | 71   | 45.4398    | 71.0000  |                                                                             |                         |    |    |   |   |   |   |
| FN1899  | -1.058                 | 15.333               | 1.374e-4 | 1.312e-4 | 109    | 230  | 124.7012   | 299.3718 | AAL93998.1  Hypothetical lipoprotein                                        |                         |    |    |   |   |   |   |
|         |                        |                      |          |          | 107    | 287  | 156.8405   | 287.0000 |                                                                             |                         |    |    |   |   |   |   |
| FN1901  |                        |                      |          |          |        | 8    |            | 8.0000   | AAL94000.1  Transcription regulator, CRP family                             |                         |    |    |   |   |   |   |
|         |                        |                      |          |          |        |      |            |          |                                                                             |                         |    |    |   |   |   |   |
| FN1902  | 0.329                  | 9.555                | 4.047e-2 | 1.755e-1 | 23     | 23   | 26.3131    | 29.9372  | AAL94001.1  Deoxycytidylate deaminase                                       |                         |    |    |   |   |   |   |
|         |                        |                      |          |          | 24     | 19   | 35.1792    | 19.0000  |                                                                             |                         |    |    |   |   |   |   |
| FN1903  |                        |                      |          |          | 126    |      | 144.1500   |          | AAL94002.1  Coenzyme A disulfide reductase/ disulfide bond regulator domain |                         |    |    |   |   |   |   |
|         |                        |                      |          |          | 105    |      | 153.9089   |          |                                                                             |                         |    |    |   |   |   |   |

Show detected proteins only  
 Show all proteins  
 Filter by category:

Proteins found:  
1344

Enter (or paste) list of ORFs

Find ORFs

Test Cutoff

q-Value

p-Value

.005

| Signif | Direction | Applies To   |
|--------|-----------|--------------|
| yes    | +         | ratios, bars |
| no     | n/a       | bars         |
| yes    | -         | ratios, bars |
| yes    | +         | p-, q-Values |
| yes    | -         | p-, q-Values |

Dot Plots

 Dot Plots

Fn Summary Table FnPg vs Fn FnSg vs Fn FnPgSg vs Fn FnPgSg vs FnPg FnSg vs FnPg FnPgSg vs FnSg Fn Coverage

| Protein | FnPgSg vs FnSg         |                      |          |          | Raw    |      | Normalized |           | Description                                                              | Log <sub>2</sub> Ratios |    |    |   |   |   |   |
|---------|------------------------|----------------------|----------|----------|--------|------|------------|-----------|--------------------------------------------------------------------------|-------------------------|----|----|---|---|---|---|
|         | Log <sub>2</sub> Ratio | Log <sub>2</sub> Sum | q-Value  | p-Value  | FnPgSg | FnSg | FnPgSg     | FnSg      |                                                                          | -6                      | -4 | -2 | 0 | 2 | 4 | 6 |
| FN1905  | -0.221                 | 3.779                |          |          | 3      |      | 3.4321     |           | AAL94004.1  outer membrane protein                                       |                         |    |    |   |   |   |   |
|         |                        |                      |          |          |        | 4    |            | 4.0000    |                                                                          |                         |    |    |   |   |   |   |
| FN1906  | -0.905                 | 17.654               | 2.89e-3  | 7.328e-3 | 320    | 408  | 366.0952   | 531.0596  | AAL94005.1  Cytosol aminopeptidase                                       |                         |    |    |   |   |   |   |
|         |                        |                      |          |          | 203    | 712  | 297.5571   | 712.0000  |                                                                          |                         |    |    |   |   |   |   |
| FN1908  | -0.917                 | 16.369               | 6.053e-4 | 9.818e-4 | 192    | 330  | 219.6571   | 429.5335  | AAL94007.1  Glycerophosphoryl diester phosphodiesterase                  |                         |    |    |   |   |   |   |
|         |                        |                      |          |          | 139    | 370  | 203.7460   | 370.0000  |                                                                          |                         |    |    |   |   |   |   |
| FN1909  | 0.954                  | 13.425               | 3.667e-4 | 4.989e-4 | 127    | 52   | 145.2940   | 67.6841   | AAL94008.1  UDP-3-O-[3-hydroxymyristoyl] glucosamine N-acyltransferase   |                         |    |    |   |   |   |   |
|         |                        |                      |          |          | 100    | 83   | 146.5799   | 83.0000   |                                                                          |                         |    |    |   |   |   |   |
| FN1910  | 2.400                  | 15.833               | 1.251e-5 | 4.166e-6 | 454    | 107  | 519.3975   | 139.2730  | AAL94009.1  periplasmic protein                                          |                         |    |    |   |   |   |   |
|         |                        |                      |          |          | 403    | 71   | 590.7168   | 71.0000   |                                                                          |                         |    |    |   |   |   |   |
| FN1911  | 0.148                  | 21.351               | 4.061e-2 | 1.762e-1 | 1561   | 1320 | 1785.8579  | 1718.1339 | AAL94010.1  Outer membrane protein                                       |                         |    |    |   |   |   |   |
|         |                        |                      |          |          | 1131   | 1389 | 1657.8182  | 1389.0000 |                                                                          |                         |    |    |   |   |   |   |
| FN1912  | -0.979                 | 6.082                |          |          |        | 7    |            | 9.1113    | AAL94011.1  Hypothetical protein                                         |                         |    |    |   |   |   |   |
|         |                        |                      |          |          | 4      | 14   | 5.8632     | 14.0000   |                                                                          |                         |    |    |   |   |   |   |
| FN1913  | -0.270                 | 11.814               | 8.888e-3 | 3.045e-2 | 43     | 49   | 49.1940    | 63.7792   | AAL94012.1  hydrolase (HD superfamily)                                   |                         |    |    |   |   |   |   |
|         |                        |                      |          |          | 41     | 68   | 60.0977    | 68.0000   |                                                                          |                         |    |    |   |   |   |   |
| FN1914  | -0.335                 | 12.597               | 1.324e-2 | 4.887e-2 | 70     | 69   | 80.0833    | 89.8115   | AAL94013.1  Anti-sigma F factor antagonist                               |                         |    |    |   |   |   |   |
|         |                        |                      |          |          | 41     | 87   | 60.0977    | 87.0000   |                                                                          |                         |    |    |   |   |   |   |
| FN1917  |                        |                      |          |          |        | 10   |            | 13.0162   | AAL94016.1  tRNA delta(2)-isopentenylpyrophosphate transferase           |                         |    |    |   |   |   |   |
|         |                        |                      |          |          |        |      |            |           |                                                                          |                         |    |    |   |   |   |   |
| FN1918  | -0.038                 | 13.056               | 1.471e-1 | 7.463e-1 | 90     | 73   | 102.9643   | 95.0180   | AAL94017.1  SPO0B-associated GTP-binding protein                         |                         |    |    |   |   |   |   |
|         |                        |                      |          |          | 54     | 92   | 79.1531    | 92.0000   |                                                                          |                         |    |    |   |   |   |   |
| FN1919  | -0.124                 | 6.296                | 1.559e-1 | 7.988e-1 | 11     | 5    | 12.5845    | 6.5081    | AAL94018.1  Methyltransferase                                            |                         |    |    |   |   |   |   |
|         |                        |                      |          |          | 3      | 12   | 4.3974     | 12.0000   |                                                                          |                         |    |    |   |   |   |   |
| FN1920  |                        |                      |          |          |        |      |            |           | AAL94019.1  tRNA (5-methylaminomethyl-2-thiouridylate)-methyltransferase |                         |    |    |   |   |   |   |
|         |                        |                      |          |          |        | 4    |            | 4.0000    |                                                                          |                         |    |    |   |   |   |   |
| FN1922  | -0.215                 | 6.488                |          |          |        | 8    |            | 10.4129   | AAL94021.1  Hypothetical protein                                         |                         |    |    |   |   |   |   |
|         |                        |                      |          |          | 6      | 10   | 8.7948     | 10.0000   |                                                                          |                         |    |    |   |   |   |   |
| FN1923  |                        |                      |          |          |        |      |            |           | AAL94022.1  Adenine-specific methyltransferase                           |                         |    |    |   |   |   |   |
|         |                        |                      |          |          |        | 3    |            | 3.0000    |                                                                          |                         |    |    |   |   |   |   |
| FN1926  | -0.135                 | 12.450               | 6.65e-2  | 3.065e-1 | 71     | 59   | 81.2274    | 76.7954   | AAL94025.1  Nitrogen regulatory IIA protein                              |                         |    |    |   |   |   |   |
|         |                        |                      |          |          | 42     | 80   | 61.5635    | 80.0000   |                                                                          |                         |    |    |   |   |   |   |

Show detected proteins only  
 Show all proteins  
 Filter by category:

Proteins found: 1344

Test Cutoff

| Signif | Direction | Applies To   |
|--------|-----------|--------------|
| yes    | +         | ratios, bars |
| no     | n/a       | bars         |
| yes    | -         | ratios, bars |
| yes    | +         | p-, q-Values |
| yes    | -         | p-, q-Values |

Fn Summary Table FnPg vs Fn FnSg vs Fn FnPgSg vs Fn FnPgSg vs FnPg FnSg vs FnPg FnPgSg vs FnSg Fn Coverage

| Protein | FnPgSg vs FnSg         |                      |          |          | Raw    |      | Normalized |           | Description                                                            | Log <sub>2</sub> Ratios |    |    |   |   |
|---------|------------------------|----------------------|----------|----------|--------|------|------------|-----------|------------------------------------------------------------------------|-------------------------|----|----|---|---|
|         | Log <sub>2</sub> Ratio | Log <sub>2</sub> Sum | q-Value  | p-Value  | FnPgSg | FnSg | FnPgSg     | FnSg      |                                                                        | -6                      | -4 | -2 | 0 | 2 |
| FN1927  | -2.197                 | 14.935               | 2.101e-4 | 2.342e-4 | 74     | 272  | 84.6595    | 354.0397  | AAL94026.1  DEGV protein                                               |                         |    |    |   |   |
|         |                        |                      |          |          | 55     | 404  | 80.6189    | 404.0000  |                                                                        |                         |    |    |   |   |
| FN1928  | -0.245                 | 8.229                | 1.09e-1  | 5.294e-1 | 15     | 9    | 17.1607    | 11.7145   | AAL94027.1  Transcriptional regulator, MerR family                     |                         |    |    |   |   |
|         |                        |                      |          |          | 10     | 26   | 14.6580    | 26.0000   |                                                                        |                         |    |    |   |   |
| FN1929  | -1.513                 | 11.200               | 7.144e-3 | 2.342e-2 | 22     | 46   | 25.1690    | 59.8744   | AAL94028.1  Competence-damage protein cinA                             |                         |    |    |   |   |
|         |                        |                      |          |          | 22     | 104  | 32.2476    | 104.0000  |                                                                        |                         |    |    |   |   |
| FN1931  |                        |                      |          |          |        |      |            |           | AAL94030.1  Protease                                                   |                         |    |    |   |   |
|         |                        |                      |          |          |        | 13   |            | 13.0000   |                                                                        |                         |    |    |   |   |
| FN1933  | 0.517                  | 7.330                | 5.416e-2 | 2.44e-1  | 15     | 4    | 17.1607    | 5.2065    | AAL94032.1  Hypothetical protein                                       |                         |    |    |   |   |
|         |                        |                      |          |          | 9      | 16   | 13.1922    | 16.0000   |                                                                        |                         |    |    |   |   |
| FN1935  | -1.375                 | 4.934                |          |          | 3      | 6    | 3.4321     | 7.8097    | AAL94034.1  Adenine-specific methyltransferase                         |                         |    |    |   |   |
|         |                        |                      |          |          |        | 10   |            | 10.0000   |                                                                        |                         |    |    |   |   |
| FN1939  | 0.061                  | 7.221                | 1.685e-1 | 8.766e-1 | 9      | 13   | 10.2964    | 16.9210   | AAL94038.1  Hypothetical protein                                       |                         |    |    |   |   |
|         |                        |                      |          |          | 10     | 7    | 14.6580    | 7.0000    |                                                                        |                         |    |    |   |   |
| FN1941  | -2.187                 | 15.656               | 1.467e-3 | 3.14e-3  | 99     | 314  | 113.2607   | 408.7076  | AAL94040.1  ClpB protein                                               |                         |    |    |   |   |
|         |                        |                      |          |          | 68     | 561  | 99.6743    | 561.0000  |                                                                        |                         |    |    |   |   |
| FN1942  |                        |                      |          |          |        |      |            |           | AAL94041.1  putative DNA-binding protein                               |                         |    |    |   |   |
|         |                        |                      |          |          |        | 4    |            | 4.0000    |                                                                        |                         |    |    |   |   |
| FN1943  | -2.014                 | 21.791               | 6.105e-5 | 4.534e-5 | 828    | 2836 | 947.2712   | 3691.3846 | AAL94042.1  Tryptophanase                                              |                         |    |    |   |   |
|         |                        |                      |          |          | 647    | 3965 | 948.3717   | 3965.0000 |                                                                        |                         |    |    |   |   |
| FN1948  |                        |                      |          |          |        | 10   |            | 13.0162   | AAL94044.1  Hypothetical protein                                       |                         |    |    |   |   |
|         |                        |                      |          |          |        | 6    |            | 6.0000    |                                                                        |                         |    |    |   |   |
| FN1949  | -3.915                 | 8.189                |          |          |        | 52   |            | 67.6841   | AAL94045.1  Xaa-Pro dipeptidase                                        |                         |    |    |   |   |
|         |                        |                      |          |          | 3      | 65   | 4.3974     | 65.0000   |                                                                        |                         |    |    |   |   |
| FN1950  |                        |                      |          |          |        |      |            |           | AAL94046.1  Serine protease                                            |                         |    |    |   |   |
|         |                        |                      |          |          |        | 4    |            | 5.8632    |                                                                        |                         |    |    |   |   |
| FN1951  |                        |                      |          |          |        |      |            |           | AAL94047.1  ATPase associated with chromosome architecture/replication |                         |    |    |   |   |
|         |                        |                      |          |          |        | 4    |            | 4.0000    |                                                                        |                         |    |    |   |   |
| FN1956  |                        |                      |          |          |        | 10   |            | 13.0162   | AAL94052.1  Hypothetical protein                                       |                         |    |    |   |   |
|         |                        |                      |          |          |        | 13   |            | 13.0000   |                                                                        |                         |    |    |   |   |
| FN1964  | 0.320                  | 7.906                | 7.999e-2 | 3.761e-1 | 20     | 9    | 22.8809    | 11.7145   | AAL94054.1  O-linked GLCNAC transferase                                |                         |    |    |   |   |
|         |                        |                      |          |          | 8      | 16   | 11.7264    | 16.0000   |                                                                        |                         |    |    |   |   |

Show detected proteins only  
 Show all proteins  
 Filter by category:

Proteins found: 1344

Enter (or paste) list of ORFs

Find ORFs

Test Cutoff

q-Value p-Value

.005

| Signif      | Direction | Applies To |
|-------------|-----------|------------|
| red         | yes       | +          |
| yellow      | no        | n/a        |
| green       | yes       | -          |
| pink        | yes       | +          |
| light green | yes       | -          |

Applies To: ratios, bars; ratios, bars; p-, q-Values

Dot Plots Dot Plots

Fn Summary Table FnPg vs Fn FnSg vs Fn FnPgSg vs Fn FnPgSg vs FnPg FnSg vs FnPg FnPgSg vs FnSg Fn Coverage

| Protein | FnPgSg vs FnSg         |                      |          |          | Raw    |      | Normalized |          | Description                                                  | Log <sub>2</sub> Ratios |    |    |   |   |   |   |
|---------|------------------------|----------------------|----------|----------|--------|------|------------|----------|--------------------------------------------------------------|-------------------------|----|----|---|---|---|---|
|         | Log <sub>2</sub> Ratio | Log <sub>2</sub> Sum | q-Value  | p-Value  | FnPgSg | FnSg | FnPgSg     | FnSg     |                                                              | -6                      | -4 | -2 | 0 | 2 | 4 | 6 |
| FN1965  | 0.108                  | 11.026               | 1.362e-1 | 6.822e-1 | 47     | 43   | 53.7702    | 55.9695  | AAL94055.1  Tetratricopeptide repeat family protein          |                         |    |    |   |   |   |   |
|         |                        |                      |          |          | 28     | 32   | 41.0424    | 32.0000  |                                                              |                         |    |    |   |   |   |   |
| FN1966  | -0.366                 | 12.227               | 8.625e-3 | 2.939e-2 | 49     | 67   | 56.0583    | 87.2083  | AAL94056.1  Hypothetical protein                             |                         |    |    |   |   |   |   |
|         |                        |                      |          |          | 45     | 70   | 65.9609    | 70.0000  |                                                              |                         |    |    |   |   |   |   |
| FN1970  |                        |                      |          |          | 14     |      | 16.0167    |          | AAL94060.1  Hemin-binding periplasmic protein hmuT precursor |                         |    |    |   |   |   |   |
|         |                        |                      |          |          |        |      |            |          |                                                              |                         |    |    |   |   |   |   |
| FN1971  | 1.677                  | 7.587                | 5.685e-4 | 8.956e-4 | 19     | 5    | 21.7369    | 6.5081   | AAL94061.1  Hemin receptor                                   |                         |    |    |   |   |   |   |
|         |                        |                      |          |          | 19     | 9    | 27.8502    | 9.0000   |                                                              |                         |    |    |   |   |   |   |
| FN1972  | -1.209                 | 9.164                | 2.551e-2 | 1.038e-1 | 16     | 16   | 18.3048    | 20.8259  | AAL94062.1  unknown                                          |                         |    |    |   |   |   |   |
|         |                        |                      |          |          | 9      | 52   | 13.1922    | 52.0000  |                                                              |                         |    |    |   |   |   |   |
| FN1973  | 1.685                  | 13.567               | 1.902e-5 | 8.481e-6 | 166    | 56   | 189.9119   | 72.8905  | AAL94063.1  Translation initiation inhibitor                 |                         |    |    |   |   |   |   |
|         |                        |                      |          |          | 140    | 50   | 205.2118   | 50.0000  |                                                              |                         |    |    |   |   |   |   |
| FN1974  |                        |                      |          |          |        |      |            |          | AAL94064.1  DNA/RNA helicase (DEAD/DEAH BOX family)          |                         |    |    |   |   |   |   |
|         |                        |                      |          |          |        | 7    |            | 7.0000   |                                                              |                         |    |    |   |   |   |   |
| FN1975  | 0.081                  | 13.898               | 1.217e-1 | 5.996e-1 | 103    | 107  | 117.8369   | 139.2730 | AAL94065.1  ATP-dependent RNA helicase                       |                         |    |    |   |   |   |   |
|         |                        |                      |          |          | 93     | 101  | 136.3193   | 101.0000 |                                                              |                         |    |    |   |   |   |   |
| FN1976  | -1.613                 | 10.618               | 9.677e-4 | 1.855e-3 | 14     | 62   | 16.0167    | 80.7002  | AAL94066.1  4-amino-4-deoxychorismate lyase                  |                         |    |    |   |   |   |   |
|         |                        |                      |          |          | 20     | 58   | 29.3160    | 58.0000  |                                                              |                         |    |    |   |   |   |   |
| FN1977  | -1.092                 | 5.480                |          |          | 4      | 5    | 4.5762     | 6.5081   | AAL94067.1  Cell cycle protein MesJ                          |                         |    |    |   |   |   |   |
|         |                        |                      |          |          |        | 13   |            | 13.0000  |                                                              |                         |    |    |   |   |   |   |
| FN1978  | 0.759                  | 13.903               | 4.993e-4 | 7.463e-4 | 129    | 64   | 147.5821   | 83.3035  | AAL94068.1  Cell division protein ftsH                       |                         |    |    |   |   |   |   |
|         |                        |                      |          |          | 119    | 107  | 174.4300   | 107.0000 |                                                              |                         |    |    |   |   |   |   |
| FN1979  |                        |                      |          |          | 204    |      | 233.3857   |          | AAL94069.1  SSU ribosomal protein S15P                       |                         |    |    |   |   |   |   |
|         |                        |                      |          |          | 210    |      | 307.8177   |          |                                                              |                         |    |    |   |   |   |   |
| FN1980  | -0.244                 | 4.517                |          |          |        | 4    |            | 5.2065   | AAL94070.1  Transporter                                      |                         |    |    |   |   |   |   |
|         |                        |                      |          |          | 3      |      | 4.3974     |          |                                                              |                         |    |    |   |   |   |   |
| FN1983  | 1.642                  | 17.302               | 4.642e-4 | 6.762e-4 | 564    | 186  | 645.2427   | 242.1007 | AAL94073.1  Alkyl hydroperoxide reductase C22 protein        |                         |    |    |   |   |   |   |
|         |                        |                      |          |          | 529    | 213  | 775.4075   | 213.0000 |                                                              |                         |    |    |   |   |   |   |
| FN1984  | 1.105                  | 16.684               | 5.058e-4 | 7.595e-4 | 376    | 154  | 430.1618   | 200.4490 | AAL94074.1  Thioredoxin reductase                            |                         |    |    |   |   |   |   |
|         |                        |                      |          |          | 356    | 242  | 521.8243   | 242.0000 |                                                              |                         |    |    |   |   |   |   |
| FN1985  | -0.469                 | 12.492               | 1.799e-3 | 4.055e-3 | 50     | 65   | 57.2024    | 84.6051  | AAL94075.1  Inner membrane protein                           |                         |    |    |   |   |   |   |
|         |                        |                      |          |          | 49     | 94   | 71.8241    | 94.0000  |                                                              |                         |    |    |   |   |   |   |

Show detected proteins only  
 Show all proteins  
 Filter by category:

Proteins found: 1344

Enter (or paste) list of ORFs

Find ORFs

Test Cutoff

q-Value

p-Value

.005

| Signif | Direction | Applies To   |
|--------|-----------|--------------|
| yes    | +         | ratios, bars |
| no     | n/a       | bars         |
| yes    | -         | ratios, bars |
| yes    | +         | p-, q-Values |
| yes    | -         | p-, q-Values |

Dot Plots Dot Plots

Fn Summary Table FnPg vs Fn FnSg vs Fn FnPgSg vs Fn FnPgSg vs FnPg FnSg vs FnPg FnPgSg vs FnSg Fn Coverage

| Protein | FnPgSg vs FnSg         |                      |          |          | Raw    |      | Normalized |           | Description                                                   | Log <sub>2</sub> Ratios |    |    |   |   |   |   |
|---------|------------------------|----------------------|----------|----------|--------|------|------------|-----------|---------------------------------------------------------------|-------------------------|----|----|---|---|---|---|
|         | Log <sub>2</sub> Ratio | Log <sub>2</sub> Sum | q-Value  | p-Value  | FnPgSg | FnSg | FnPgSg     | FnSg      |                                                               | -6                      | -4 | -2 | 0 | 2 | 4 | 6 |
| FN1986  | 0.089                  | 15.805               | 1.387e-1 | 6.968e-1 | 234    | 222  | 267.7071   | 288.9589  | AAL94076.1  Hypothetical protein                              |                         |    |    |   |   |   |   |
|         |                        |                      |          |          | 154    | 175  | 225.7330   | 175.0000  |                                                               |                         |    |    |   |   |   |   |
| FN1987  | -0.246                 | 4.924                |          |          | 5      |      | 5.7202     |           | AAL94077.1  Transcriptional regulator, GntR family            |                         |    |    |   |   |   |   |
|         |                        |                      |          |          | 3      | 6    | 4.3974     | 6.0000    |                                                               |                         |    |    |   |   |   |   |
| FN1988  | -3.718                 | 17.333               | 2.444e-3 | 5.965e-3 | 92     | 1391 | 105.2524   | 1810.5486 | AAL94078.1  Tyrosine phenol-lyase                             |                         |    |    |   |   |   |   |
|         |                        |                      |          |          | 81     | 1137 | 118.7297   | 1137.0000 |                                                               |                         |    |    |   |   |   |   |
| FN1989  |                        |                      |          |          |        | 12   |            | 15.6194   | AAL94079.1  Sodium-dependent tyrosine transporter             |                         |    |    |   |   |   |   |
|         |                        |                      |          |          |        | 8    |            | 8.0000    |                                                               |                         |    |    |   |   |   |   |
| FN1991  | 0.158                  | 17.211               | 2.173e-2 | 8.692e-2 | 349    | 260  | 399.2725   | 338.4203  | AAL94081.1  Glucosamine-1-phosphate acetyltransferase         |                         |    |    |   |   |   |   |
|         |                        |                      |          |          | 289    | 399  | 423.6158   | 399.0000  |                                                               |                         |    |    |   |   |   |   |
| FN1992  | -0.918                 | 16.269               | 3.882e-3 | 1.07e-2  | 173    | 340  | 197.9202   | 442.5496  | AAL94082.1  Ribose-phosphate pyrophosphokinase                |                         |    |    |   |   |   |   |
|         |                        |                      |          |          | 144    | 330  | 211.0750   | 330.0000  |                                                               |                         |    |    |   |   |   |   |
| FN1993  | 0.427                  | 5.321                |          |          |        | 3    |            | 3.9048    | AAL94083.1  SUA5 protein                                      |                         |    |    |   |   |   |   |
|         |                        |                      |          |          | 5      | 7    | 7.3290     | 7.0000    |                                                               |                         |    |    |   |   |   |   |
| FN1994  | 0.911                  | 10.173               | 3.862e-2 | 1.663e-1 | 43     | 35   | 49.1940    | 45.5566   | AAL94084.1  Hypothetical protein                              |                         |    |    |   |   |   |   |
|         |                        |                      |          |          | 30     | 4    | 43.9740    | 4.0000    |                                                               |                         |    |    |   |   |   |   |
| FN1995  |                        |                      |          |          | 9      |      | 10.2964    |           | AAL94085.1  Hypothetical protein                              |                         |    |    |   |   |   |   |
|         |                        |                      |          |          | 19     |      | 27.8502    |           |                                                               |                         |    |    |   |   |   |   |
| FN2001  |                        |                      |          |          |        | 18   |            | 23.4291   | AAL94091.1  Hypothetical protein                              |                         |    |    |   |   |   |   |
|         |                        |                      |          |          |        | 19   |            | 19.0000   |                                                               |                         |    |    |   |   |   |   |
| FN2002  |                        |                      |          |          |        | 3    |            | 3.0000    | AAL94092.1  Permease                                          |                         |    |    |   |   |   |   |
|         |                        |                      |          |          |        |      |            |           |                                                               |                         |    |    |   |   |   |   |
| FN2007  | 0.028                  | 5.454                | 1.798e-1 | 9.482e-1 | 4      | 7    | 4.5762     | 9.1113    | AAL94097.1  Glutathione peroxidase                            |                         |    |    |   |   |   |   |
|         |                        |                      |          |          | 6      | 4    | 8.7948     | 4.0000    |                                                               |                         |    |    |   |   |   |   |
| FN2008  |                        |                      |          |          |        | 4    |            | 5.2065    | AAL94098.1  Glycine betaine transport ATP-binding protein     |                         |    |    |   |   |   |   |
|         |                        |                      |          |          |        |      |            |           |                                                               |                         |    |    |   |   |   |   |
| FN2009  |                        |                      |          |          |        | 6    |            | 7.8097    | AAL94099.1  Glycine betaine transport system permease protein |                         |    |    |   |   |   |   |
|         |                        |                      |          |          |        | 8    |            | 8.0000    |                                                               |                         |    |    |   |   |   |   |
| FN2011  | -0.192                 | 13.809               | 1.261e-1 | 6.243e-1 | 87     | 60   | 99.5321    | 78.0970   | AAL94101.1  Valyl-tRNA synthetase                             |                         |    |    |   |   |   |   |
|         |                        |                      |          |          | 85     | 178  | 124.5929   | 178.0000  |                                                               |                         |    |    |   |   |   |   |
| FN2013  |                        |                      |          |          |        | 5    |            | 6.5081    | AAL94103.1  GTP-binding protein                               |                         |    |    |   |   |   |   |
|         |                        |                      |          |          |        | 6    |            | 6.0000    |                                                               |                         |    |    |   |   |   |   |

Show detected proteins only  
 Show all proteins  
 Filter by category:

Proteins found:  
1344

Test Cutoff

| Signif | Direction | Applies To   |
|--------|-----------|--------------|
| yes    | +         | ratios, bars |
| no     | n/a       | bars         |
| yes    | -         | ratios, bars |
| yes    | +         | p-, q-Values |
| yes    | -         |              |



Fn Summary Table FnPg vs Fn FnSg vs Fn FnPgSg vs Fn FnPgSg vs FnPg FnSg vs FnPg FnPgSg vs FnSg Fn Coverage

| Protein | FnPgSg vs FnSg         |                      |          |          | Raw    |      | Normalized |          | Description                                                          | Log <sub>2</sub> Ratios |    |    |   |   |   |   |
|---------|------------------------|----------------------|----------|----------|--------|------|------------|----------|----------------------------------------------------------------------|-------------------------|----|----|---|---|---|---|
|         | Log <sub>2</sub> Ratio | Log <sub>2</sub> Sum | q-Value  | p-Value  | FnPgSg | FnSg | FnPgSg     | FnSg     |                                                                      | -6                      | -4 | -2 | 0 | 2 | 4 | 6 |
| FN2014  | 0.253                  | 14.801               | 5.745e-3 | 1.793e-2 | 152    | 128  | 173.8952   | 166.6069 | AAL94104.1  ATP-dependent protease La                                |                         |    |    |   |   |   |   |
|         |                        |                      |          |          | 133    | 143  | 194.9512   | 143.0000 |                                                                      |                         |    |    |   |   |   |   |
| FN2015  | -0.296                 | 13.399               | 1.369e-2 | 5.077e-2 | 73     | 97   | 83.5155    | 126.2568 | AAL94105.1  ATP-dependent clp protease ATP-binding subunit clpX      |                         |    |    |   |   |   |   |
|         |                        |                      |          |          | 71     | 104  | 104.0717   | 104.0000 |                                                                      |                         |    |    |   |   |   |   |
| FN2016  | 1.466                  | 9.513                | 2.541e-4 | 3.084e-4 | 35     | 15   | 40.0417    | 19.5242  | AAL94106.1  ATP-dependent Clp protease proteolytic subunit           |                         |    |    |   |   |   |   |
|         |                        |                      |          |          | 34     | 13   | 49.8372    | 13.0000  |                                                                      |                         |    |    |   |   |   |   |
| FN2017  | 1.230                  | 18.442               | 8.06e-4  | 1.455e-3 | 711    | 273  | 813.4177   | 355.3413 | AAL94107.1  Trigger factor, ppiase                                   |                         |    |    |   |   |   |   |
|         |                        |                      |          |          | 692    | 424  | 1014.3326  | 424.0000 |                                                                      |                         |    |    |   |   |   |   |
| FN2018  | 1.088                  | 8.775                | 2.493e-4 | 2.997e-4 | 29     | 9    | 33.1774    | 11.7145  | AAL94108.1  Single-stranded-DNA-specific exonuclease recJ            |                         |    |    |   |   |   |   |
|         |                        |                      |          |          | 19     | 17   | 27.8502    | 17.0000  |                                                                      |                         |    |    |   |   |   |   |
| FN2019  | 2.387                  | 7.557                |          |          | 19     |      | 21.7369    |          | AAL94109.1  Ribosome-binding factor A                                |                         |    |    |   |   |   |   |
|         |                        |                      |          |          | 28     | 6    | 41.0424    | 6.0000   |                                                                      |                         |    |    |   |   |   |   |
| FN2020  | -0.213                 | 16.400               | 6.688e-2 | 3.084e-1 | 243    | 196  | 278.0035   | 255.1168 | AAL94110.1  Bacterial Protein Translation Initiation Factor 2 (IF-2) |                         |    |    |   |   |   |   |
|         |                        |                      |          |          | 183    | 378  | 268.2411   | 378.0000 |                                                                      |                         |    |    |   |   |   |   |
| FN2022  | -0.172                 | 12.823               | 3.686e-3 | 9.988e-3 | 71     | 72   | 81.2274    | 93.7164  | AAL94112.1  N utilization substance protein A                        |                         |    |    |   |   |   |   |
|         |                        |                      |          |          | 54     | 87   | 79.1531    | 87.0000  |                                                                      |                         |    |    |   |   |   |   |
| FN2023  | -0.570                 | 7.739                | 4.309e-3 | 1.233e-2 | 12     | 12   | 13.7286    | 15.6194  | AAL94113.1  Hypothetical cytosolic protein                           |                         |    |    |   |   |   |   |
|         |                        |                      |          |          | 7      | 20   | 10.2606    | 20.0000  |                                                                      |                         |    |    |   |   |   |   |
| FN2030  | 1.854                  | 13.135               | 1.219e-4 | 1.117e-4 | 150    | 39   | 171.6071   | 50.7630  | AAL94115.1  Inorganic pyrophosphatase                                |                         |    |    |   |   |   |   |
|         |                        |                      |          |          | 129    | 49   | 189.0880   | 49.0000  |                                                                      |                         |    |    |   |   |   |   |
| FN2031  | 1.801                  | 5.801                |          |          | 9      |      | 10.2964    |          | AAL94116.1  Thiamine biosynthesis lipoprotein appE                   |                         |    |    |   |   |   |   |
|         |                        |                      |          |          | 12     | 4    | 17.5896    | 4.0000   |                                                                      |                         |    |    |   |   |   |   |
| FN2033  |                        |                      |          |          |        |      |            |          | AAL94118.1  Guanylate kinase                                         |                         |    |    |   |   |   |   |
|         |                        |                      |          |          |        | 13   |            | 13.0000  |                                                                      |                         |    |    |   |   |   |   |
| FN2034  | 1.273                  | 9.117                | 4.011e-5 | 2.53e-5  | 32     | 11   | 36.6095    | 14.3178  | AAL94119.1  Protein yicC                                             |                         |    |    |   |   |   |   |
|         |                        |                      |          |          | 25     | 16   | 36.6450    | 16.0000  |                                                                      |                         |    |    |   |   |   |   |
| FN2035  | -0.121                 | 18.040               | 4.997e-2 | 2.227e-1 | 418    | 453  | 478.2118   | 589.6323 | AAL94120.1  DNA-directed RNA polymerase beta' chain                  |                         |    |    |   |   |   |   |
|         |                        |                      |          |          | 353    | 493  | 517.4269   | 493.0000 |                                                                      |                         |    |    |   |   |   |   |
| FN2036  | -0.151                 | 17.382               | 1.088e-2 | 3.88e-2  | 327    | 318  | 374.1035   | 413.9141 | AAL94121.1  DNA-directed RNA polymerase beta chain                   |                         |    |    |   |   |   |   |
|         |                        |                      |          |          | 280    | 457  | 410.4236   | 457.0000 |                                                                      |                         |    |    |   |   |   |   |
| FN2037  | 3.228                  | 21.788               | 1.093e-6 | 1.38e-7  | 4959   | 315  | 5673.3309  | 410.0092 | AAL94122.1  LSU ribosomal protein L12P (L7/L12)                      |                         |    |    |   |   |   |   |
|         |                        |                      |          |          | 4077   | 833  | 5976.0609  | 833.0000 |                                                                      |                         |    |    |   |   |   |   |

Show detected proteins only  
 Show all proteins  
 Filter by category:

Proteins found: 1344

Test Cutoff

| Signif | Direction | Applies To   |
|--------|-----------|--------------|
| yes    | +         | ratios, bars |
| no     | n/a       | bars         |
| yes    | -         | ratios, bars |
| yes    | +         | p-, q-Values |
| yes    | -         | p-, q-Values |

Fn Summary Table FnPg vs Fn FnSg vs Fn FnPgSg vs Fn FnPgSg vs FnPg FnSg vs FnPg FnPgSg vs FnSg Fn Coverage

| Protein | FnPgSg vs FnSg         |                      |          |           | Raw    |      | Normalized |          | Description                                             | Log <sub>2</sub> Ratios |    |    |   |   |   |   |
|---------|------------------------|----------------------|----------|-----------|--------|------|------------|----------|---------------------------------------------------------|-------------------------|----|----|---|---|---|---|
|         | Log <sub>2</sub> Ratio | Log <sub>2</sub> Sum | q-Value  | p-Value   | FnPgSg | FnSg | FnPgSg     | FnSg     |                                                         | -6                      | -4 | -2 | 0 | 2 | 4 | 6 |
| FN2038  | 1.684                  | 15.881               | 2.981e-9 | 3.763e-11 | 383    | 103  | 438.1701   | 134.0665 | AAL94123.1  LSU ribosomal protein L10P                  |                         |    |    |   |   |   |   |
|         |                        |                      |          |           | 302    | 140  | 442.6712   | 140.0000 |                                                         |                         |    |    |   |   |   |   |
| FN2039  | 0.361                  | 16.701               | 1.01e-2  | 3.546e-2  | 316    | 252  | 361.5190   | 328.0074 | AAL94124.1  LSU ribosomal protein L1P                   |                         |    |    |   |   |   |   |
|         |                        |                      |          |           | 258    | 248  | 378.1760   | 248.0000 |                                                         |                         |    |    |   |   |   |   |
| FN2040  | 3.504                  | 12.270               | 1.581e-4 | 1.596e-4  | 223    | 19   | 255.1226   | 24.7307  | AAL94125.1  LSU ribosomal protein L11P                  |                         |    |    |   |   |   |   |
|         |                        |                      |          |           | 149    | 17   | 218.4040   | 17.0000  |                                                         |                         |    |    |   |   |   |   |
| FN2041  | 0.534                  | 9.920                | 3.5e-3   | 9.337e-3  | 36     | 19   | 41.1857    | 24.7307  | AAL94126.1  Transcription antitermination protein nusG  |                         |    |    |   |   |   |   |
|         |                        |                      |          |           | 23     | 27   | 33.7134    | 27.0000  |                                                         |                         |    |    |   |   |   |   |
| FN2045  |                        |                      |          |           |        | 7    |            | 9.1113   | AAL94129.1  Ferric uptake regulation protein            |                         |    |    |   |   |   |   |
|         |                        |                      |          |           |        | 17   |            | 17.0000  |                                                         |                         |    |    |   |   |   |   |
| FN2046  |                        |                      |          |           |        | 16   |            | 20.8259  | AAL94130.1  Acetyltransferase                           |                         |    |    |   |   |   |   |
|         |                        |                      |          |           |        | 14   |            | 14.0000  |                                                         |                         |    |    |   |   |   |   |
| FN2047  | -0.075                 | 13.911               | 1.179e-1 | 5.781e-1  | 91     | 92   | 104.1083   | 119.7487 | AAL94131.1  Fusobacterium outer membrane protein family |                         |    |    |   |   |   |   |
|         |                        |                      |          |           | 94     | 135  | 137.7851   | 135.0000 |                                                         |                         |    |    |   |   |   |   |
| FN2048  | -0.305                 | 16.664               | 8.723e-2 | 4.134e-1  | 234    | 180  | 267.7071   | 234.2910 | AAL94132.1  Outer membrane protein                      |                         |    |    |   |   |   |   |
|         |                        |                      |          |           | 213    | 482  | 312.2151   | 482.0000 |                                                         |                         |    |    |   |   |   |   |
| FN2049  | -0.913                 | 17.211               | 3.001e-5 | 1.622e-5  | 231    | 430  | 264.2749   | 559.6951 | AAL94133.1  unknown                                     |                         |    |    |   |   |   |   |
|         |                        |                      |          |           | 207    | 509  | 303.4203   | 509.0000 |                                                         |                         |    |    |   |   |   |   |
| FN2050  | 2.392                  | 13.594               | 2.816e-3 | 7.096e-3  | 175    | 40   | 200.2083   | 52.0647  | AAL94134.1  Hypothetical membrane-spanning protein      |                         |    |    |   |   |   |   |
|         |                        |                      |          |           | 211    | 45   | 309.2835   | 45.0000  |                                                         |                         |    |    |   |   |   |   |
| FN2051  | 1.058                  | 13.619               | 4.575e-3 | 1.338e-2  | 142    | 81   | 162.4547   | 105.4309 | AAL94135.1  unknown                                     |                         |    |    |   |   |   |   |
|         |                        |                      |          |           | 110    | 50   | 161.2378   | 50.0000  |                                                         |                         |    |    |   |   |   |   |
| FN2052  | 1.004                  | 13.451               | 5.799e-3 | 1.815e-2  | 121    | 81   | 138.4297   | 105.4309 | AAL94136.1  unknown                                     |                         |    |    |   |   |   |   |
|         |                        |                      |          |           | 110    | 44   | 161.2378   | 44.0000  |                                                         |                         |    |    |   |   |   |   |
| FN2053  | 1.233                  | 12.764               | 6.316e-4 | 1.045e-3  | 98     | 49   | 112.1166   | 63.7792  | AAL94137.1  Serine/threonine sodium symporter           |                         |    |    |   |   |   |   |
|         |                        |                      |          |           | 98     | 45   | 143.6483   | 45.0000  |                                                         |                         |    |    |   |   |   |   |
| FN2054  | 1.112                  | 14.803               | 1.403e-5 | 5.063e-6  | 227    | 96   | 259.6988   | 124.9552 | AAL94138.1  Glucose-6-phosphate isomerase               |                         |    |    |   |   |   |   |
|         |                        |                      |          |           | 162    | 105  | 237.4594   | 105.0000 |                                                         |                         |    |    |   |   |   |   |
| FN2058  | 0.653                  | 16.059               | 5.724e-4 | 9.045e-4  | 269    | 155  | 307.7487   | 201.7506 | AAL94142.1  Fusobacterium outer membrane protein family |                         |    |    |   |   |   |   |
|         |                        |                      |          |           | 237    | 215  | 347.3943   | 215.0000 |                                                         |                         |    |    |   |   |   |   |
| FN2059  | -0.305                 | 16.664               | 8.723e-2 | 4.134e-1  | 234    | 180  | 267.7071   | 234.2910 | AAL94143.1  Outer membrane protein                      |                         |    |    |   |   |   |   |
|         |                        |                      |          |           | 213    | 482  | 312.2151   | 482.0000 |                                                         |                         |    |    |   |   |   |   |

Show detected proteins only  
 Show all proteins  
 Filter by category:

Proteins found: 1344

Test Cutoff

| Signif | Direction | Applies To   |
|--------|-----------|--------------|
| yes    | +         | ratios, bars |
| no     | n/a       | bars         |
| yes    | -         | ratios, bars |
| yes    | +         | p-, q-Values |
| yes    | -         | p-, q-Values |

Fn Summary Table FnPg vs Fn FnSg vs Fn FnPgSg vs Fn FnPgSg vs FnPg FnSg vs FnPg FnPgSg vs FnSg Fn Coverage

| Protein | FnPgSg vs FnSg         |                      |          |          | Raw    |      | Normalized |           | Description                                          | Log <sub>2</sub> Ratios |    |    |   |   |   |   |
|---------|------------------------|----------------------|----------|----------|--------|------|------------|-----------|------------------------------------------------------|-------------------------|----|----|---|---|---|---|
|         | Log <sub>2</sub> Ratio | Log <sub>2</sub> Sum | q-Value  | p-Value  | FnPgSg | FnSg | FnPgSg     | FnSg      |                                                      | -6                      | -4 | -2 | 0 | 2 | 4 | 6 |
| FN2060  | -0.913                 | 17.211               | 3.001e-5 | 1.622e-5 | 231    | 430  | 264.2749   | 559.6951  | AAL94144.1  unknown                                  |                         |    |    |   |   |   |   |
|         |                        |                      |          |          | 207    | 509  | 303.4203   | 509.0000  |                                                      |                         |    |    |   |   |   |   |
| FN2061  | 2.392                  | 13.594               | 2.816e-3 | 7.096e-3 | 175    | 40   | 200.2083   | 52.0647   | AAL94145.1  Hypothetical membrane-spanning protein   |                         |    |    |   |   |   |   |
|         |                        |                      |          |          | 211    | 45   | 309.2835   | 45.0000   |                                                      |                         |    |    |   |   |   |   |
| FN2062  | 1.058                  | 13.619               | 4.575e-3 | 1.338e-2 | 142    | 81   | 162.4547   | 105.4309  | AAL94146.1  unknown                                  |                         |    |    |   |   |   |   |
|         |                        |                      |          |          | 110    | 50   | 161.2378   | 50.0000   |                                                      |                         |    |    |   |   |   |   |
| FN2063  | 1.004                  | 13.451               | 5.799e-3 | 1.815e-2 | 121    | 81   | 138.4297   | 105.4309  | AAL94147.1  unknown                                  |                         |    |    |   |   |   |   |
|         |                        |                      |          |          | 110    | 44   | 161.2378   | 44.0000   |                                                      |                         |    |    |   |   |   |   |
| FN2067  | 1.346                  | 6.516                |          |          | 10     |      | 11.4405    |           | AAL94151.1  Thiol:disulfide interchange protein tlpA |                         |    |    |   |   |   |   |
|         |                        |                      |          |          | 13     | 6    | 19.0554    | 6.0000    |                                                      |                         |    |    |   |   |   |   |
| FN2068  | -2.132                 | 6.520                |          |          | 4      | 7    | 4.5762     | 9.1113    | AAL94152.1  dGTP triphosphohydrolase                 |                         |    |    |   |   |   |   |
|         |                        |                      |          |          |        | 31   |            | 31.0000   |                                                      |                         |    |    |   |   |   |   |
| FN2070  | -1.507                 | 5.895                |          |          | 4      | 10   | 4.5762     | 13.0162   | AAL94154.1  Cobyric acid synthase                    |                         |    |    |   |   |   |   |
|         |                        |                      |          |          |        | 13   |            | 13.0000   |                                                      |                         |    |    |   |   |   |   |
| FN2073  | -2.586                 | 9.733                | 2.449e-3 | 5.982e-3 | 8      | 43   | 9.1524     | 55.9695   | AAL94157.1  Adenine phosphoribosyltransferase        |                         |    |    |   |   |   |   |
|         |                        |                      |          |          | 10     | 87   | 14.6580    | 87.0000   |                                                      |                         |    |    |   |   |   |   |
| FN2074  |                        |                      |          |          |        |      |            |           | AAL94158.1  BsIIM                                    |                         |    |    |   |   |   |   |
|         |                        |                      |          |          | 4      |      | 5.8632     |           |                                                      |                         |    |    |   |   |   |   |
| FN2075  | 0.841                  | 9.292                | 1.359e-2 | 5.034e-2 | 24     | 8    | 27.4571    | 10.4129   | AAL94159.1  Hypothetical protein                     |                         |    |    |   |   |   |   |
|         |                        |                      |          |          | 27     | 27   | 39.5766    | 27.0000   |                                                      |                         |    |    |   |   |   |   |
| FN2076  |                        |                      |          |          |        |      |            |           | AAL94160.1  MunI regulatory protein                  |                         |    |    |   |   |   |   |
|         |                        |                      |          |          | 3      |      | 4.3974     |           |                                                      |                         |    |    |   |   |   |   |
| FN2078  |                        |                      |          |          |        |      |            |           | AAL94162.1  Transcriptional regulator, DeoR family   |                         |    |    |   |   |   |   |
|         |                        |                      |          |          |        | 8    |            | 8.0000    |                                                      |                         |    |    |   |   |   |   |
| FN2082  | -0.188                 | 21.158               | 8.588e-2 | 4.064e-1 | 1557   | 1156 | 1781.2817  | 1504.6687 | AAL94166.1  Formate--tetrahydrofolate ligase         |                         |    |    |   |   |   |   |
|         |                        |                      |          |          | 740    | 1761 | 1084.6910  | 1761.0000 |                                                      |                         |    |    |   |   |   |   |
| FN2093  | 1.127                  | 8.734                | 7.759e-3 | 2.596e-2 | 20     | 13   | 22.8809    | 16.9210   | AAL94177.1  General secretion pathway protein G      |                         |    |    |   |   |   |   |
|         |                        |                      |          |          | 26     | 11   | 38.1108    | 11.0000   |                                                      |                         |    |    |   |   |   |   |
| FN2098  | -1.688                 | 5.246                |          |          | 3      | 7    | 3.4321     | 9.1113    | AAL94182.1  MRP-family nucleotide-binding protein    |                         |    |    |   |   |   |   |
|         |                        |                      |          |          |        | 13   |            | 13.0000   |                                                      |                         |    |    |   |   |   |   |
| FN2100  | 0.775                  | 10.407               | 3.135e-5 | 1.727e-5 | 42     | 21   | 48.0500    | 27.3339   | AAL94184.1  Hypothetical protein                     |                         |    |    |   |   |   |   |
|         |                        |                      |          |          | 33     | 29   | 48.3714    | 29.0000   |                                                      |                         |    |    |   |   |   |   |

Show detected proteins only  
 Show all proteins  
 Filter by category:

Proteins found: 1344

Enter (or paste) list of ORFs

Find ORFs

Test Cutoff

q-Value

p-Value

.005

| Signif | Direction | Applies To   |
|--------|-----------|--------------|
| yes    | +         | ratios, bars |
| no     | n/a       | bars         |
| yes    | -         | ratios, bars |
| yes    | +         | p-, q-Values |
| yes    | -         | p-, q-Values |

Dot Plots Dot Plots

Fn Summary Table FnPg vs Fn FnSg vs Fn FnPgSg vs Fn FnPgSg vs FnPg FnSg vs FnPg FnPgSg vs FnSg Fn Coverage

| Protein | FnPgSg vs FnSg         |                      |          |          | Raw    |      | Normalized |          | Description                                                    | Log <sub>2</sub> Ratios |    |    |   |   |
|---------|------------------------|----------------------|----------|----------|--------|------|------------|----------|----------------------------------------------------------------|-------------------------|----|----|---|---|
|         | Log <sub>2</sub> Ratio | Log <sub>2</sub> Sum | q-Value  | p-Value  | FnPgSg | FnSg | FnPgSg     | FnSg     |                                                                | -6                      | -4 | -2 | 0 | 2 |
| FN2102  | -1.324                 | 8.022                | 3.408e-3 | 9.02e-3  | 5      | 20   | 5.7202     | 26.0323  | AAL94186.1  ABC transporter ATP-binding protein                |                         |    |    |   |   |
|         |                        |                      |          |          | 10     | 25   | 14.6580    | 25.0000  |                                                                |                         |    |    |   |   |
| FN2103  | 0.136                  | 19.347               | 3.788e-2 | 1.626e-1 | 788    | 651  | 901.5093   | 847.3524 | AAL94187.1  tricarboxylate-binding protein                     |                         |    |    |   |   |
|         |                        |                      |          |          | 553    | 711  | 810.5866   | 711.0000 |                                                                |                         |    |    |   |   |
| FN2105  |                        |                      |          |          | 12     |      | 13.7286    |          | AAL94189.1  tricarboxylate transport membrane protein RctA     |                         |    |    |   |   |
|         |                        |                      |          |          | 9      |      | 13.1922    |          |                                                                |                         |    |    |   |   |
| FN2106  | 0.194                  | 13.947               | 7.47e-3  | 2.475e-2 | 112    | 96   | 128.1333   | 124.9552 | AAL94190.1  Transporter                                        |                         |    |    |   |   |
|         |                        |                      |          |          | 96     | 110  | 140.7167   | 110.0000 |                                                                |                         |    |    |   |   |
| FN2107  | 2.332                  | 9.622                | 2.264e-6 | 3.328e-7 | 55     | 10   | 62.9226    | 13.0162  | AAL94191.1  Galactokinase                                      |                         |    |    |   |   |
|         |                        |                      |          |          | 43     | 12   | 63.0293    | 12.0000  |                                                                |                         |    |    |   |   |
| FN2108  | 0.954                  | 9.436                | 3.829e-4 | 5.266e-4 | 32     | 16   | 36.6095    | 20.8259  | AAL94192.1  Galactose-1-phosphate uridylyltransferase          |                         |    |    |   |   |
|         |                        |                      |          |          | 25     | 17   | 36.6450    | 17.0000  |                                                                |                         |    |    |   |   |
| FN2109  | 0.359                  | 11.889               | 8.152e-4 | 1.479e-3 | 63     | 39   | 72.0750    | 50.7630  | AAL94193.1  UDP-glucose 4-epimerase                            |                         |    |    |   |   |
|         |                        |                      |          |          | 46     | 58   | 67.4267    | 58.0000  |                                                                |                         |    |    |   |   |
| FN2116  | -0.874                 | 6.286                | 3.594e-2 | 1.531e-1 | 5      | 13   | 5.7202     | 16.9210  | AAL94200.1  Hypothetical exported 24-amino acid repeat protein |                         |    |    |   |   |
|         |                        |                      |          |          | 5      | 7    | 7.3290     | 7.0000   |                                                                |                         |    |    |   |   |
| FN2117  |                        |                      |          |          |        |      |            |          | AAL94201.1  Hypothetical exported 24-amino acid repeat protein |                         |    |    |   |   |
|         |                        |                      |          |          |        | 9    |            | 9.0000   |                                                                |                         |    |    |   |   |
| FN2118  | 1.759                  | 6.929                |          |          | 15     |      | 17.1607    |          | AAL94202.1  Hypothetical exported 24-amino acid repeat protein |                         |    |    |   |   |
|         |                        |                      |          |          | 16     | 6    | 23.4528    | 6.0000   |                                                                |                         |    |    |   |   |
| FN2119  | 0.173                  | 8.514                | 1.09e-1  | 5.294e-1 | 15     | 10   | 17.1607    | 13.0162  | AAL94203.1  Hypothetical exported 24-amino acid repeat protein |                         |    |    |   |   |
|         |                        |                      |          |          | 16     | 23   | 23.4528    | 23.0000  |                                                                |                         |    |    |   |   |
| FN2121  | 2.905                  | 10.309               |          |          | 91     | 10   | 104.1083   | 13.0162  | AAL94205.1  Hypothetical exported 24-amino acid repeat protein |                         |    |    |   |   |
|         |                        |                      |          |          | 62     |      | 90.8795    |          |                                                                |                         |    |    |   |   |
| FN2122  | -0.132                 | 16.770               | 1.905e-2 | 7.448e-2 | 297    | 275  | 339.7821   | 357.9446 | AAL94206.1  Phenylalanyl-tRNA synthetase beta chain            |                         |    |    |   |   |
|         |                        |                      |          |          | 204    | 342  | 299.0229   | 342.0000 |                                                                |                         |    |    |   |   |
| FN2123  | -0.766                 | 12.973               | 1.906e-2 | 7.453e-2 | 60     | 66   | 68.6428    | 85.9067  | AAL94207.1  Phenylalanyl-tRNA synthetase alpha chain           |                         |    |    |   |   |
|         |                        |                      |          |          | 47     | 148  | 68.8925    | 148.0000 |                                                                |                         |    |    |   |   |
| FN2125  | -0.204                 | 12.238               | 7.585e-3 | 2.523e-2 | 53     | 57   | 60.6345    | 74.1921  | AAL94209.1  DNA gyrase subunit A                               |                         |    |    |   |   |
|         |                        |                      |          |          | 47     | 75   | 68.8925    | 75.0000  |                                                                |                         |    |    |   |   |
| FN2126  | 1.802                  | 11.286               | 7.438e-5 | 5.847e-5 | 85     | 15   | 97.2440    | 19.5242  | AAL94210.1  DNA gyrase subunit B                               |                         |    |    |   |   |
|         |                        |                      |          |          | 61     | 34   | 89.4137    | 34.0000  |                                                                |                         |    |    |   |   |

Show detected proteins only  
 Show all proteins  
 Filter by category:

Proteins found: 1344

Test Cutoff

| Signif | Direction | Applies To   |
|--------|-----------|--------------|
| yes    | +         | ratios, bars |
| no     | n/a       | bars         |
| yes    | -         | ratios, bars |
| yes    | +         | p-, q-Values |
| yes    | -         |              |
