# Supplementary material for: Proteomics of Fusobacterium nucleatum within a model developing oral microbial community
Source: PubMed Central journal article supplement (PMC4234264; doi:10.1002/mbo3.204), 2014-08-25
Supplement: mbo30003-0729-sd9.pdf [file mbo30003-0729-sd9.pdf]

Fn Summary Table FnPg vs Fn FnSg vs Fn FnPgSg vs Fn FnPgSg vs FnPg FnSg vs FnPg FnPgSg vs FnSg Fn Coverage

| Protein | FnSg vs Fn             |                      |          |          | Raw  |    | Normalized |         | Description                                                    | Log <sub>2</sub> Ratios |    |    |   |   |   |   |
|---------|------------------------|----------------------|----------|----------|------|----|------------|---------|----------------------------------------------------------------|-------------------------|----|----|---|---|---|---|
|         | Log <sub>2</sub> Ratio | Log <sub>2</sub> Sum | q-Value  | p-Value  | FnSg | Fn | FnSg       | Fn      |                                                                | -6                      | -4 | -2 | 0 | 2 | 4 | 6 |
| FN0001  | -0.721                 | 8.536                | 3.344e-3 | 1.286e-2 | 10   | 22 | 13.0162    | 28.4878 | AAL94214.1  Chromosomal replication initiator protein dnaA     |                         |    |    |   |   |   |   |
|         |                        |                      |          |          | 17   | 15 | 17.0000    | 20.9761 |                                                                |                         |    |    |   |   |   |   |
| FN0004  | -1.041                 | 11.595               | 1.344e-4 | 2.314e-4 | 35   | 66 | 45.5566    | 85.4634 | AAL94217.1  Inner membrane protein                             |                         |    |    |   |   |   |   |
|         |                        |                      |          |          | 32   | 53 | 32.0000    | 74.1157 |                                                                |                         |    |    |   |   |   |   |
| FN0005  | -1.546                 | 10.372               | 4.85e-4  | 1.179e-3 | 12   | 41 | 15.6194    | 53.0909 | AAL94218.1  Jag protein                                        |                         |    |    |   |   |   |   |
|         |                        |                      |          |          | 27   | 51 | 27.0000    | 71.3189 |                                                                |                         |    |    |   |   |   |   |
| FN0006  | 0.271                  | 9.476                | 6.231e-3 | 2.671e-2 | 22   | 17 | 28.6356    | 22.0133 | AAL94219.1  Thiophene and furan oxidation protein THDF         |                         |    |    |   |   |   |   |
|         |                        |                      |          |          | 30   | 19 | 30.0000    | 26.5698 |                                                                |                         |    |    |   |   |   |   |
| FN0007  | -0.993                 | 8.847                | 3.101e-3 | 1.17e-2  | 8    | 23 | 10.4129    | 29.7827 | AAL94220.1  Glucose inhibited division protein A               |                         |    |    |   |   |   |   |
|         |                        |                      |          |          | 20   | 22 | 20.0000    | 30.7650 |                                                                |                         |    |    |   |   |   |   |
| FN0008  |                        |                      |          |          | 6    |    | 7.8097     |         | AAL94221.1  Quinolinate synthetase A                           |                         |    |    |   |   |   |   |
|         |                        |                      |          |          | 11   |    | 11.0000    |         |                                                                |                         |    |    |   |   |   |   |
| FN0009  |                        |                      |          |          |      |    |            |         | AAL94222.1  L-aspartate oxidase                                |                         |    |    |   |   |   |   |
|         |                        |                      |          |          | 25   |    | 25.0000    |         |                                                                |                         |    |    |   |   |   |   |
| FN0017  | -0.525                 | 5.744                | 3.621e-3 | 1.424e-2 | 4    | 6  | 5.2065     | 7.7694  | AAL94230.1  Hypothetical protein                               |                         |    |    |   |   |   |   |
|         |                        |                      |          |          | 7    | 7  | 7.0000     | 9.7889  |                                                                |                         |    |    |   |   |   |   |
| FN0018  | -1.340                 | 10.536               | 7.478e-5 | 1.095e-4 | 18   | 45 | 23.4291    | 58.2705 | AAL94231.1  Hypothetical protein                               |                         |    |    |   |   |   |   |
|         |                        |                      |          |          | 25   | 46 | 25.0000    | 64.3268 |                                                                |                         |    |    |   |   |   |   |
| FN0019  | 0.493                  | 4.631                |          |          | 6    |    | 7.8097     |         | AAL94232.1  Transcription-repair coupling factor               |                         |    |    |   |   |   |   |
|         |                        |                      |          |          | 4    | 3  | 4.0000     | 4.1952  |                                                                |                         |    |    |   |   |   |   |
| FN0021  |                        |                      |          |          |      |    |            |         | AAL94234.1  4-diphosphocytidyl-2-C-methyl-D-erythritol kinase  |                         |    |    |   |   |   |   |
|         |                        |                      |          |          |      | 5  |            | 6.9920  |                                                                |                         |    |    |   |   |   |   |
| FN0022  | -2.619                 | 9.954                | 5.088e-7 | 5.976e-8 | 8    | 59 | 10.4129    | 76.3991 | AAL94235.1  Hypothetical protein                               |                         |    |    |   |   |   |   |
|         |                        |                      |          |          | 15   | 57 | 15.0000    | 79.7094 |                                                                |                         |    |    |   |   |   |   |
| FN0023  |                        |                      |          |          |      |    |            |         | AAL94236.1  Short-chain fatty acids transporter                |                         |    |    |   |   |   |   |
|         |                        |                      |          |          | 15   |    | 15.0000    |         |                                                                |                         |    |    |   |   |   |   |
| FN0024  | -2.296                 | 10.636               |          |          |      | 75 |            | 97.1175 | AAL94237.1  Hypothetical exported 24-amino acid repeat protein |                         |    |    |   |   |   |   |
|         |                        |                      |          |          | 18   | 57 | 18.0000    | 79.7094 |                                                                |                         |    |    |   |   |   |   |
| FN0025  | -2.514                 | 8.514                |          |          |      | 36 |            | 46.6164 | AAL94238.1  Hypothetical exported 24-amino acid repeat protein |                         |    |    |   |   |   |   |
|         |                        |                      |          |          | 8    | 32 | 8.0000     | 44.7491 |                                                                |                         |    |    |   |   |   |   |
| FN0026  |                        |                      |          |          |      | 9  |            | 11.6541 | AAL94239.1  Hypothetical exported 24-amino acid repeat protein |                         |    |    |   |   |   |   |
|         |                        |                      |          |          |      | 21 |            | 29.3666 |                                                                |                         |    |    |   |   |   |   |

Show detected proteins only  
 Show all proteins  
 Filter by category:

Proteins found: 1358

Enter (or paste) list of ORFs

Find ORFs

Test Cutoff

q-Value

p-Value

.005

| Signif | Direction | Applies To   |
|--------|-----------|--------------|
| yes    | +         | ratios, bars |
| no     | n/a       | bars         |
| yes    | -         | ratios, bars |
| yes    | +         | p-, q-Values |
| yes    | -         | p-, q-Values |

Dot Plots Dot Plots

Fn Summary Table FnPg vs Fn FnSg vs Fn FnPgSg vs Fn FnPgSg vs FnPg FnSg vs FnPg FnPgSg vs FnSg Fn Coverage

| Protein | FnSg vs Fn             |                      |          |          | Raw  |      | Normalized |           | Description                                                              | Log <sub>2</sub> Ratios |    |    |   |   |   |   |
|---------|------------------------|----------------------|----------|----------|------|------|------------|-----------|--------------------------------------------------------------------------|-------------------------|----|----|---|---|---|---|
|         | Log <sub>2</sub> Ratio | Log <sub>2</sub> Sum | q-Value  | p-Value  | FnSg | Fn   | FnSg       | Fn        |                                                                          | -6                      | -4 | -2 | 0 | 2 | 4 | 6 |
| FN0029  |                        |                      |          |          |      | 7    |            | 9.0643    | AAL94242.1  Flavodoxin                                                   |                         |    |    |   |   |   |   |
|         |                        |                      |          |          |      | 9    |            | 12.5857   |                                                                          |                         |    |    |   |   |   |   |
| FN0030  | 0.770                  | 12.755               | 3.016e-4 | 6.467e-4 | 90   | 53   | 117.1455   | 68.6297   | AAL94243.1  5-nitroimidazole antibiotic resistance protein               |                         |    |    |   |   |   |   |
|         |                        |                      |          |          | 100  | 42   | 100.0000   | 58.7332   |                                                                          |                         |    |    |   |   |   |   |
| FN0031  | 1.640                  | 7.650                | 3.089e-6 | 9.391e-7 | 20   | 7    | 26.0323    | 9.0643    | AAL94244.1  unknown                                                      |                         |    |    |   |   |   |   |
|         |                        |                      |          |          | 24   | 5    | 24.0000    | 6.9920    |                                                                          |                         |    |    |   |   |   |   |
| FN0033  | -0.389                 | 12.980               | 1.059e-7 | 6.028e-9 | 60   | 79   | 78.0970    | 102.2971  | AAL94246.1  unknown                                                      |                         |    |    |   |   |   |   |
|         |                        |                      |          |          | 79   | 74   | 79.0000    | 103.4823  |                                                                          |                         |    |    |   |   |   |   |
| FN0034  | -0.699                 | 9.136                | 2.259e-5 | 1.945e-5 | 14   | 24   | 18.2226    | 31.0776   | AAL94247.1  unknown                                                      |                         |    |    |   |   |   |   |
|         |                        |                      |          |          | 19   | 21   | 19.0000    | 29.3666   |                                                                          |                         |    |    |   |   |   |   |
| FN0039  | 0.521                  | 7.561                | 7.269e-4 | 2.007e-3 | 13   | 8    | 16.9210    | 10.3592   | AAL94252.1  DNA primase (bacterial type) and small primase-like proteins |                         |    |    |   |   |   |   |
|         |                        |                      |          |          | 16   | 9    | 16.0000    | 12.5857   |                                                                          |                         |    |    |   |   |   |   |
| FN0040  | 0.442                  | 18.592               | 1.777e-5 | 1.378e-5 | 549  | 402  | 714.5875   | 520.5499  | AAL94253.1  Asparaginyl-tRNA synthetase                                  |                         |    |    |   |   |   |   |
|         |                        |                      |          |          | 751  | 399  | 751.0000   | 557.9655  |                                                                          |                         |    |    |   |   |   |   |
| FN0041  |                        |                      |          |          |      | 8    |            | 10.3592   | AAL94254.1  unknown                                                      |                         |    |    |   |   |   |   |
|         |                        |                      |          |          |      | 8    |            | 11.1873   |                                                                          |                         |    |    |   |   |   |   |
| FN0043  |                        |                      |          |          |      | 15   |            | 19.4235   | AAL94256.1  Hypothetical exported 24-amino acid repeat protein           |                         |    |    |   |   |   |   |
|         |                        |                      |          |          |      | 9    |            | 12.5857   |                                                                          |                         |    |    |   |   |   |   |
| FN0045  | -0.622                 | 6.237                |          |          |      | 8    |            | 10.3592   | AAL94258.1  Shikimate 5-dehydrogenase                                    |                         |    |    |   |   |   |   |
|         |                        |                      |          |          | 7    | 8    | 7.0000     | 11.1873   |                                                                          |                         |    |    |   |   |   |   |
| FN0046  |                        |                      |          |          |      | 5    |            | 6.4745    | AAL94259.1  3-dehydroquinate dehydratase                                 |                         |    |    |   |   |   |   |
|         |                        |                      |          |          |      | 3    |            | 4.1952    |                                                                          |                         |    |    |   |   |   |   |
| FN0047  | -0.690                 | 12.656               | 1.944e-4 | 3.696e-4 | 48   | 82   | 62.4776    | 106.1818  | AAL94260.1  Exodeoxyribonuclease III                                     |                         |    |    |   |   |   |   |
|         |                        |                      |          |          | 64   | 70   | 64.0000    | 97.8887   |                                                                          |                         |    |    |   |   |   |   |
| FN0048  | -0.904                 | 10.176               | 7.755e-4 | 2.196e-3 | 19   | 33   | 24.7307    | 42.7317   | AAL94261.1  4-nitrophenylphosphatase                                     |                         |    |    |   |   |   |   |
|         |                        |                      |          |          | 25   | 36   | 25.0000    | 50.3427   |                                                                          |                         |    |    |   |   |   |   |
| FN0049  | 3.827                  | 7.964                |          |          | 40   |      | 52.0647    |           | AAL94262.1  Hypothetical protein                                         |                         |    |    |   |   |   |   |
|         |                        |                      |          |          | 67   | 3    | 67.0000    | 4.1952    |                                                                          |                         |    |    |   |   |   |   |
| FN0050  | -2.906                 | 18.386               | 8.682e-5 | 1.311e-4 | 151  | 1157 | 196.5441   | 1498.1996 | AAL94263.1  Fumarate reductase flavoprotein subunit                      |                         |    |    |   |   |   |   |
|         |                        |                      |          |          | 231  | 1221 | 231.0000   | 1707.4583 |                                                                          |                         |    |    |   |   |   |   |
| FN0052  |                        |                      |          |          |      | 44   |            | 56.9756   | AAL94265.1  Arsenate reductase                                           |                         |    |    |   |   |   |   |
|         |                        |                      |          |          |      | 37   |            | 51.7412   |                                                                          |                         |    |    |   |   |   |   |

Show detected proteins only  
 Show all proteins  
 Filter by category:

Proteins found: 1358

Test Cutoff

| Signif | Direction | Applies To   |
|--------|-----------|--------------|
| yes    | +         | ratios, bars |
| no     | n/a       | bars         |
| yes    | -         | ratios, bars |
| yes    | +         | p-, q-Values |
| yes    | -         |              |

Fn Summary Table FnPg vs Fn FnSg vs Fn FnPgSg vs Fn FnPgSg vs FnPg FnSg vs FnPg FnPgSg vs FnSg Fn Coverage

| Protein | FnSg vs Fn             |                      |          |          | Raw  |     | Normalized |          | Description                                                                     | Log <sub>2</sub> Ratios |    |    |   |   |   |   |
|---------|------------------------|----------------------|----------|----------|------|-----|------------|----------|---------------------------------------------------------------------------------|-------------------------|----|----|---|---|---|---|
|         | Log <sub>2</sub> Ratio | Log <sub>2</sub> Sum | q-Value  | p-Value  | FnSg | Fn  | FnSg       | Fn       |                                                                                 | -6                      | -4 | -2 | 0 | 2 | 4 | 6 |
| FN0054  | -0.304                 | 14.970               | 6.079e-6 | 2.647e-6 | 124  | 153 | 161.4005   | 198.1197 | AAL94267.1  Tyrosyl-tRNA synthetase                                             |                         |    |    |   |   |   |   |
|         |                        |                      |          |          | 161  | 143 | 161.0000   | 199.9726 |                                                                                 |                         |    |    |   |   |   |   |
| FN0058  | 0.314                  | 15.791               | 8.433e-2 | 4.894e-1 | 116  | 171 | 150.9875   | 221.4279 | AAL94271.1  Cysteine desulfhydrase                                              |                         |    |    |   |   |   |   |
|         |                        |                      |          |          | 380  | 147 | 380.0000   | 205.5662 |                                                                                 |                         |    |    |   |   |   |   |
| FN0059  | -0.273                 | 11.390               | 6.53e-2  | 3.713e-1 | 24   | 48  | 31.2388    | 62.1552  | AAL94272.1  NifU protein                                                        |                         |    |    |   |   |   |   |
|         |                        |                      |          |          | 63   | 37  | 63.0000    | 51.7412  |                                                                                 |                         |    |    |   |   |   |   |
| FN0060  | -2.452                 | 8.067                |          |          |      | 30  |            | 38.8470  | AAL94273.1  D-alanyl-D-alanine carboxypeptidase                                 |                         |    |    |   |   |   |   |
|         |                        |                      |          |          | 7    | 27  | 7.0000     | 37.7571  |                                                                                 |                         |    |    |   |   |   |   |
| FN0061  | 0.005                  | 12.882               | 1.523e-1 | 9.547e-1 | 60   | 67  | 78.0970    | 86.7583  | AAL94274.1  Thermostable carboxypeptidase 1                                     |                         |    |    |   |   |   |   |
|         |                        |                      |          |          | 96   | 62  | 96.0000    | 86.7014  |                                                                                 |                         |    |    |   |   |   |   |
| FN0062  |                        |                      |          |          |      | 7   |            | 9.0643   | AAL94275.1  Hypothetical cytosolic protein                                      |                         |    |    |   |   |   |   |
|         |                        |                      |          |          |      | 11  |            | 15.3825  |                                                                                 |                         |    |    |   |   |   |   |
| FN0063  |                        |                      |          |          |      |     |            |          | AAL94276.1  unknown                                                             |                         |    |    |   |   |   |   |
|         |                        |                      |          |          | 24   |     | 24.0000    |          |                                                                                 |                         |    |    |   |   |   |   |
| FN0065  | -0.894                 | 14.252               | 2.279e-4 | 4.492e-4 | 66   | 157 | 85.9067    | 203.2993 | AAL94278.1  Transcription accessory protein (S1 RNA binding domain)             |                         |    |    |   |   |   |   |
|         |                        |                      |          |          | 119  | 127 | 119.0000   | 177.5980 |                                                                                 |                         |    |    |   |   |   |   |
| FN0066  |                        |                      |          |          |      |     |            |          | AAL94279.1  Two component system histidine kinase                               |                         |    |    |   |   |   |   |
|         |                        |                      |          |          | 5    |     | 5.0000     |          |                                                                                 |                         |    |    |   |   |   |   |
| FN0067  | -1.276                 | 17.068               | 1.701e-5 | 1.293e-5 | 180  | 434 | 234.2910   | 561.9867 | AAL94280.1  Isoleucyl-tRNA synthetase                                           |                         |    |    |   |   |   |   |
|         |                        |                      |          |          | 242  | 423 | 242.0000   | 591.5273 |                                                                                 |                         |    |    |   |   |   |   |
| FN0069  | -0.019                 | 15.094               | 1.435e-1 | 8.903e-1 | 161  | 159 | 209.5603   | 205.8891 | AAL94282.1  Glycyl-tRNA synthetase alpha chain                                  |                         |    |    |   |   |   |   |
|         |                        |                      |          |          | 162  | 122 | 162.0000   | 170.6060 |                                                                                 |                         |    |    |   |   |   |   |
| FN0070  | 0.067                  | 18.090               | 2.792e-2 | 1.478e-1 | 432  | 390 | 562.2984   | 505.0111 | AAL94283.1  Glycyl-tRNA synthetase beta chain                                   |                         |    |    |   |   |   |   |
|         |                        |                      |          |          | 519  | 377 | 519.0000   | 527.2005 |                                                                                 |                         |    |    |   |   |   |   |
| FN0071  | -0.296                 | 6.671                |          |          | 7    |     | 9.1113     |          | AAL94284.1  GTP cyclohydrolase I                                                |                         |    |    |   |   |   |   |
|         |                        |                      |          |          |      | 8   |            | 11.1873  |                                                                                 |                         |    |    |   |   |   |   |
| FN0072  | 0.620                  | 13.588               | 2.807e-4 | 5.872e-4 | 100  | 67  | 130.1617   | 86.7583  | AAL94285.1  2-amino-4-hydroxy-6-hydroxymethyldihydropteridine pyrophosphokinase |                         |    |    |   |   |   |   |
|         |                        |                      |          |          | 145  | 66  | 145.0000   | 92.2950  |                                                                                 |                         |    |    |   |   |   |   |
| FN0073  | -0.528                 | 10.367               | 2.285e-2 | 1.186e-1 | 15   | 35  | 19.5242    | 45.3215  | AAL94286.1  Dihydropteroate synthase                                            |                         |    |    |   |   |   |   |
|         |                        |                      |          |          | 41   | 30  | 41.0000    | 41.9523  |                                                                                 |                         |    |    |   |   |   |   |
| FN0074  | -0.234                 | 8.494                | 9.103e-2 | 5.322e-1 | 10   | 21  | 13.0162    | 27.1929  | AAL94287.1  Ethanolamine utilization protein eutS                               |                         |    |    |   |   |   |   |
|         |                        |                      |          |          | 22   | 10  | 22.0000    | 13.9841  |                                                                                 |                         |    |    |   |   |   |   |

Show detected proteins only  
 Show all proteins  
 Filter by category:

Proteins found: 1358

Test Cutoff

| Signif | Direction | Applies To   |
|--------|-----------|--------------|
| yes    | +         | ratios, bars |
| no     | n/a       | bars         |
| yes    | -         | ratios, bars |
| yes    | +         | p-, q-Values |
| yes    | -         |              |

Fn Summary Table FnPg vs Fn FnSg vs Fn FnPgSg vs Fn FnPgSg vs FnPg FnSg vs FnPg FnPgSg vs FnSg Fn Coverage

| Protein       | FnSg vs Fn             |                      |          |          | Raw  |     | Normalized |          | Description                                                  | Log <sub>2</sub> Ratios |    |    |   |   |   |   |
|---------------|------------------------|----------------------|----------|----------|------|-----|------------|----------|--------------------------------------------------------------|-------------------------|----|----|---|---|---|---|
|               | Log <sub>2</sub> Ratio | Log <sub>2</sub> Sum | q-Value  | p-Value  | FnSg | Fn  | FnSg       | Fn       |                                                              | -6                      | -4 | -2 | 0 | 2 | 4 | 6 |
| <b>FN0077</b> | 0.632                  | 6.769                |          |          | 13   | 6   | 13.0000    | 8.3905   | AAL94290.1  Ethanolamine two-component sensor kinase         |                         |    |    |   |   |   |   |
| <b>FN0078</b> | 1.437                  | 7.574                |          |          | 18   |     | 23.4291    |          | AAL94291.1  Ethanolamine utilization protein eutA            |                         |    |    |   |   |   |   |
| <b>FN0079</b> | 1.007                  | 14.387               | 4.635e-5 | 5.506e-5 | 169  | 86  | 219.9732   | 111.3614 | AAL94292.1  Ethanolamine ammonia-lyase heavy chain           |                         |    |    |   |   |   |   |
| <b>FN0080</b> | 0.180                  | 14.085               | 3.374e-2 | 1.823e-1 | 118  | 106 | 153.5908   | 137.2594 | AAL94293.1  Ethanolamine ammonia-lyase light chain           |                         |    |    |   |   |   |   |
| <b>FN0081</b> | 1.350                  | 14.856               | 2.767e-3 | 1.014e-2 | 172  | 78  | 223.8780   | 101.0022 | AAL94294.1  Ethanolamine utilization protein eutL            |                         |    |    |   |   |   |   |
| <b>FN0082</b> | 1.343                  | 9.229                |          |          | 20   |     | 26.0323    |          | AAL94295.1  Ethanolamine utilization protein eutM            |                         |    |    |   |   |   |   |
| <b>FN0083</b> | 0.714                  | 15.208               | 2.881e-3 | 1.066e-2 | 164  | 132 | 213.4651   | 170.9268 | AAL94296.1  Ethanolamine utilization protein eutM precursor  |                         |    |    |   |   |   |   |
| <b>FN0084</b> | -0.211                 | 10.727               | 3.136e-2 | 1.681e-1 | 25   | 36  | 32.5404    | 46.6164  | AAL94297.1  Acetaldehyde dehydrogenase (acetylating)         |                         |    |    |   |   |   |   |
| <b>FN0087</b> |                        |                      |          |          | 5    |     | 5.0000     |          | AAL94300.1  Ethanolamine utilization protein eutN            |                         |    |    |   |   |   |   |
| <b>FN0088</b> | 0.686                  | 5.654                |          |          | 9    | 4   | 9.0000     | 5.5936   | AAL94301.1  Hypothetical protein                             |                         |    |    |   |   |   |   |
| <b>FN0090</b> |                        |                      |          |          | 7    |     | 9.1113     |          | AAL94303.1  Ethanolamine utilization protein eutQ            |                         |    |    |   |   |   |   |
| <b>FN0092</b> | 0.830                  | 11.203               | 1.614e-5 | 1.197e-5 | 48   | 26  | 62.4776    | 33.6674  | AAL94305.1  NADPH-dependent butanol dehydrogenase            |                         |    |    |   |   |   |   |
| <b>FN0093</b> | -1.914                 | 15.202               | 4.362e-4 | 1.028e-3 | 83   | 323 | 108.0342   | 418.2528 | AAL94306.1  Thioredoxin                                      |                         |    |    |   |   |   |   |
| <b>FN0100</b> | -1.531                 | 9.011                | 2.386e-3 | 8.457e-3 | 9    | 24  | 11.7145    | 31.0776  | AAL94309.1  Flavodoxins/hemoproteins                         |                         |    |    |   |   |   |   |
| <b>FN0102</b> |                        |                      |          |          |      | 12  |            | 15.5388  | AAL94311.1  Ribonucleoside-diphosphate reductase alpha chain |                         |    |    |   |   |   |   |
| <b>FN0103</b> |                        |                      |          |          |      | 7   |            | 9.0643   | AAL94312.1  Ribonucleoside-diphosphate reductase beta chain  |                         |    |    |   |   |   |   |
|               |                        |                      |          |          |      | 8   |            | 11.1873  |                                                              |                         |    |    |   |   |   |   |

Show detected proteins only  
 Show all proteins  
 Filter by category:

Proteins found: 1358

Enter (or paste) list of ORFs

Test Cutoff

| Signif | Direction | Applies To   |
|--------|-----------|--------------|
| yes    | +         | ratios, bars |
| no     | n/a       | bars         |
| yes    | -         | ratios, bars |
| yes    | +         | p-, q-Values |
| yes    | -         | p-, q-Values |

Fn Summary Table FnPg vs Fn FnSg vs Fn FnPgSg vs Fn FnPgSg vs FnPg FnSg vs FnPg FnPgSg vs FnSg Fn Coverage

| Protein | FnSg vs Fn             |                      |          |          | Raw  |     | Normalized |           | Description                                             | Log <sub>2</sub> Ratios |    |    |   |   |   |   |
|---------|------------------------|----------------------|----------|----------|------|-----|------------|-----------|---------------------------------------------------------|-------------------------|----|----|---|---|---|---|
|         | Log <sub>2</sub> Ratio | Log <sub>2</sub> Sum | q-Value  | p-Value  | FnSg | Fn  | FnSg       | Fn        |                                                         | -6                      | -4 | -2 | 0 | 2 | 4 | 6 |
| FN0106  | 0.078                  | 13.533               | 4.921e-2 | 2.742e-1 | 82   | 87  | 106.7326   | 112.6563  | AAL94315.1  Hypothetical protein                        |                         |    |    |   |   |   |   |
|         |                        |                      |          |          | 117  | 71  | 117.0000   | 99.2871   |                                                         |                         |    |    |   |   |   |   |
| FN0108  | 1.487                  | 8.008                | 9.4e-4   | 2.763e-3 | 19   | 4   | 24.7307    | 5.1796    | AAL94317.1  Microcin C7 self-immunity protein mccF      |                         |    |    |   |   |   |   |
|         |                        |                      |          |          | 29   | 10  | 29.0000    | 13.9841   |                                                         |                         |    |    |   |   |   |   |
| FN0110  | -0.130                 | 17.494               | 4.738e-3 | 1.946e-2 | 303  | 352 | 394.3898   | 455.8049  | AAL94319.1  Seryl-tRNA synthetase                       |                         |    |    |   |   |   |   |
|         |                        |                      |          |          | 427  | 317 | 427.0000   | 443.2959  |                                                         |                         |    |    |   |   |   |   |
| FN0113  | 1.648                  | 12.879               | 2.225e-5 | 1.905e-5 | 114  | 39  | 148.3843   | 50.5011   | AAL94322.1  Heat-inducible transcription repressor hrcA |                         |    |    |   |   |   |   |
|         |                        |                      |          |          | 159  | 34  | 159.0000   | 47.5459   |                                                         |                         |    |    |   |   |   |   |
| FN0114  | -0.075                 | 14.091               | 1.259e-1 | 7.656e-1 | 71   | 109 | 92.4148    | 141.1441  | AAL94323.1  GrpE protein                                |                         |    |    |   |   |   |   |
|         |                        |                      |          |          | 165  | 93  | 165.0000   | 130.0521  |                                                         |                         |    |    |   |   |   |   |
| FN0116  | 0.796                  | 20.976               | 2.799e-2 | 1.482e-1 | 902  | 797 | 1174.0581  | 1032.0355 | AAL94325.1  Chaperone protein dnaK                      |                         |    |    |   |   |   |   |
|         |                        |                      |          |          | 2611 | 821 | 2611.0000  | 1148.0944 |                                                         |                         |    |    |   |   |   |   |
| FN0117  | 1.687                  | 7.298                |          |          | 10   |     | 13.0162    |           | AAL94326.1  O6-methylguanine-DNA methyltransferase      |                         |    |    |   |   |   |   |
|         |                        |                      |          |          | 32   | 5   | 32.0000    | 6.9920    |                                                         |                         |    |    |   |   |   |   |
| FN0118  | -0.444                 | 12.870               | 2.452e-3 | 8.742e-3 | 51   | 77  | 66.3824    | 99.7073   | AAL94327.1  Chaperone protein dnaJ                      |                         |    |    |   |   |   |   |
|         |                        |                      |          |          | 82   | 73  | 82.0000    | 102.0839  |                                                         |                         |    |    |   |   |   |   |
| FN0119  | 2.217                  | 9.566                | 7.543e-3 | 3.351e-2 | 29   | 10  | 37.7469    | 12.9490   | AAL94328.1  Flavodoxin                                  |                         |    |    |   |   |   |   |
|         |                        |                      |          |          | 81   | 9   | 81.0000    | 12.5857   |                                                         |                         |    |    |   |   |   |   |
| FN0123  | -0.005                 | 5.782                | 1.538e-1 | 9.655e-1 | 6    | 5   | 7.8097     | 6.4745    | AAL94332.1  ATPase                                      |                         |    |    |   |   |   |   |
|         |                        |                      |          |          | 7    | 6   | 7.0000     | 8.3905    |                                                         |                         |    |    |   |   |   |   |
| FN0127  |                        |                      |          |          | 5    |     | 6.5081     |           | AAL94333.1  Fe-S oxidoreductase                         |                         |    |    |   |   |   |   |
|         |                        |                      |          |          | 7    |     | 7.0000     |           |                                                         |                         |    |    |   |   |   |   |
| FN0128  | -0.987                 | 9.255                | 6.848e-3 | 2.989e-2 | 7    | 30  | 9.1113     | 38.8470   | AAL94334.1  Spermidine/putrescine-binding protein       |                         |    |    |   |   |   |   |
|         |                        |                      |          |          | 26   | 22  | 26.0000    | 30.7650   |                                                         |                         |    |    |   |   |   |   |
| FN0129  |                        |                      |          |          |      |     |            | 3.8847    | AAL94335.1  Urease accessory protein ureG               |                         |    |    |   |   |   |   |
|         |                        |                      |          |          |      |     |            |           |                                                         |                         |    |    |   |   |   |   |
| FN0130  | -0.093                 | 8.466                |          |          | 8    | 15  | 10.4129    | 19.4235   | AAL94336.1  ABC transporter ATP-binding protein         |                         |    |    |   |   |   |   |
|         |                        |                      |          |          | 26   |     | 26.0000    |           |                                                         |                         |    |    |   |   |   |   |
| FN0132  | -0.484                 | 5.654                |          |          |      |     |            | 8.3905    | AAL93916.1  Hemolysin                                   |                         |    |    |   |   |   |   |
|         |                        |                      |          |          | 6    | 6   | 6.0000     |           |                                                         |                         |    |    |   |   |   |   |
| FN0147  | -0.653                 | 10.659               | 7.029e-4 | 1.917e-3 | 27   | 39  | 35.1436    | 50.5011   | AAL94353.1  PLSX protein                                |                         |    |    |   |   |   |   |
|         |                        |                      |          |          | 29   | 36  | 29.0000    | 50.3427   |                                                         |                         |    |    |   |   |   |   |

Show detected proteins only  
 Show all proteins  
 Filter by category:

Proteins found:  
1358

Test Cutoff

| Signif | Direction | Applies To   |
|--------|-----------|--------------|
| yes    | +         | ratios, bars |
| no     | n/a       | bars         |
| yes    | -         | ratios, bars |
| yes    | +         | p-, q-Values |
| yes    | -         |              |

Fn Summary Table FnPg vs Fn FnSg vs Fn FnPgSg vs Fn FnPgSg vs FnPg FnSg vs FnPg FnPgSg vs FnSg Fn Coverage

| Protein | FnSg vs Fn             |                      |          |          | Raw  |     | Normalized |           | Description                                                   | Log <sub>2</sub> Ratios |    |    |   |   |   |   |
|---------|------------------------|----------------------|----------|----------|------|-----|------------|-----------|---------------------------------------------------------------|-------------------------|----|----|---|---|---|---|
|         | Log <sub>2</sub> Ratio | Log <sub>2</sub> Sum | q-Value  | p-Value  | FnSg | Fn  | FnSg       | Fn        |                                                               | -6                      | -4 | -2 | 0 | 2 | 4 | 6 |
| FN0148  | -0.203                 | 16.184               | 7.082e-2 | 4.05e-1  | 248  | 234 | 322.8009   | 303.0067  | AAL94354.1  3-oxoacyl-[acyl-carrier-protein] synthase III     |                         |    |    |   |   |   |   |
|         |                        |                      |          |          | 186  | 202 | 186.0000   | 282.4788  |                                                               |                         |    |    |   |   |   |   |
| FN0149  | -1.231                 | 15.077               | 7.309e-4 | 2.022e-3 | 115  | 252 | 149.6859   | 326.3149  | AAL94355.1  Malonyl-CoA-[acyl-carrier-protein] transacylase   |                         |    |    |   |   |   |   |
|         |                        |                      |          |          | 93   | 174 | 93.0000    | 243.3233  |                                                               |                         |    |    |   |   |   |   |
| FN0150  | -1.071                 | 11.516               | 6.755e-5 | 9.361e-5 | 32   | 65  | 41.6517    | 84.1685   | AAL94356.1  Acyl carrier protein                              |                         |    |    |   |   |   |   |
|         |                        |                      |          |          | 33   | 52  | 33.0000    | 72.7173   |                                                               |                         |    |    |   |   |   |   |
| FN0151  | -0.661                 | 19.578               | 7.627e-3 | 3.394e-2 | 389  | 825 | 506.3288   | 1068.2927 | AAL94357.1  3-oxoacyl-[acyl-carrier-protein] synthase         |                         |    |    |   |   |   |   |
|         |                        |                      |          |          | 901  | 827 | 901.0000   | 1156.4848 |                                                               |                         |    |    |   |   |   |   |
| FN0152  | 0.571                  | 5.429                |          |          |      | 4   |            | 5.1796    | AAL94358.1  Ribonuclease III                                  |                         |    |    |   |   |   |   |
|         |                        |                      |          |          | 8    | 4   | 8.0000     | 5.5936    |                                                               |                         |    |    |   |   |   |   |
| FN0153  |                        |                      |          |          |      |     |            |           | AAL94359.1  Oxygen-independent coproporphyrinogen III oxidase |                         |    |    |   |   |   |   |
|         |                        |                      |          |          | 13   |     | 13.0000    |           |                                                               |                         |    |    |   |   |   |   |
| FN0154  |                        |                      |          |          |      | 7   |            | 9.0643    | AAL94360.1  Ribonuclease G                                    |                         |    |    |   |   |   |   |
|         |                        |                      |          |          |      |     |            |           |                                                               |                         |    |    |   |   |   |   |
| FN0155  | -1.221                 | 5.865                |          |          |      | 9   |            | 11.6541   | AAL94361.1  Hypothetical protein                              |                         |    |    |   |   |   |   |
|         |                        |                      |          |          | 5    |     | 5.0000     |           |                                                               |                         |    |    |   |   |   |   |
| FN0156  | -0.196                 | 7.832                | 1.188e-1 | 7.161e-1 | 4    | 12  | 5.2065     | 15.5388   | AAL94362.1  Phosphopantetheine adenylyltransferase            |                         |    |    |   |   |   |   |
|         |                        |                      |          |          | 23   | 12  | 23.0000    | 16.7809   |                                                               |                         |    |    |   |   |   |   |
| FN0157  | -0.237                 | 6.014                | 1.592e-3 | 5.208e-3 | 6    | 7   | 7.8097     | 9.0643    | AAL94363.1  DNA repair protein RadA                           |                         |    |    |   |   |   |   |
|         |                        |                      |          |          | 7    | 6   | 7.0000     | 8.3905    |                                                               |                         |    |    |   |   |   |   |
| FN0158  | 0.623                  | 10.543               | 2.694e-3 | 9.808e-3 | 36   | 20  | 46.8582    | 25.8980   | AAL94364.1  DNA-binding protein                               |                         |    |    |   |   |   |   |
|         |                        |                      |          |          | 49   | 26  | 49.0000    | 36.3587   |                                                               |                         |    |    |   |   |   |   |
| FN0161  |                        |                      |          |          |      |     |            |           | AAL94367.1  RNA-directed DNA polymerase                       |                         |    |    |   |   |   |   |
|         |                        |                      |          |          | 3    |     | 3.0000     |           |                                                               |                         |    |    |   |   |   |   |
| FN0164  | -0.239                 | 16.573               | 5.724e-2 | 3.226e-1 | 278  | 243 | 361.8494   | 314.6608  | AAL94370.1  Anhydro-N-acetylmuramyl-tripeptide amidase        |                         |    |    |   |   |   |   |
|         |                        |                      |          |          | 213  | 260 | 213.0000   | 363.5865  |                                                               |                         |    |    |   |   |   |   |
| FN0170  | 0.706                  | 14.509               | 8.89e-3  | 4.064e-2 | 179  | 95  | 232.9894   | 123.0155  | AAL94376.1  GTP-binding protein                               |                         |    |    |   |   |   |   |
|         |                        |                      |          |          | 157  | 83  | 157.0000   | 116.0680  |                                                               |                         |    |    |   |   |   |   |
| FN0173  | 0.018                  | 11.786               | 1.478e-1 | 9.213e-1 | 55   | 48  | 71.5889    | 62.1552   | AAL94379.1  Hypothetical protein                              |                         |    |    |   |   |   |   |
|         |                        |                      |          |          | 48   | 40  | 48.0000    | 55.9364   |                                                               |                         |    |    |   |   |   |   |
| FN0174  | -0.094                 | 12.923               | 4.424e-2 | 2.442e-1 | 65   | 65  | 84.6051    | 84.1685   | AAL94380.1  Enoyl-[acyl-carrier-protein] reductase            |                         |    |    |   |   |   |   |
|         |                        |                      |          |          | 86   | 70  | 86.0000    | 97.8887   |                                                               |                         |    |    |   |   |   |   |

Show detected proteins only  
 Show all proteins  
 Filter by category:

Proteins found: 1358

Test Cutoff

| Signif | Direction | Applies To   |
|--------|-----------|--------------|
| yes    | +         | ratios, bars |
| no     | n/a       | bars         |
| yes    | -         | ratios, bars |
| yes    | +         | p-, q-Values |
| yes    | -         |              |

Fn Summary Table FnPg vs Fn FnSg vs Fn FnPgSg vs Fn FnPgSg vs FnPg FnSg vs FnPg FnPgSg vs FnSg Fn Coverage

| Protein | FnSg vs Fn             |                      |          |          | Raw  |     | Normalized |          | Description                                         | Log <sub>2</sub> Ratios |    |    |   |   |   |   |
|---------|------------------------|----------------------|----------|----------|------|-----|------------|----------|-----------------------------------------------------|-------------------------|----|----|---|---|---|---|
|         | Log <sub>2</sub> Ratio | Log <sub>2</sub> Sum | q-Value  | p-Value  | FnSg | Fn  | FnSg       | Fn       |                                                     | -6                      | -4 | -2 | 0 | 2 | 4 | 6 |
| FN0175  | 0.907                  | 9.357                | 1.103e-3 | 3.347e-3 | 27   | 17  | 35.1436    | 22.0133  | AAL94381.1  Cell division inhibitor MinC            |                         |    |    |   |   |   |   |
|         |                        |                      |          |          | 35   | 11  | 35.0000    | 15.3825  |                                                     |                         |    |    |   |   |   |   |
| FN0176  | 0.785                  | 15.983               | 1.232e-4 | 2.054e-4 | 272  | 158 | 354.0397   | 204.5942 | AAL94382.1  Cell division inhibitor MinD            |                         |    |    |   |   |   |   |
|         |                        |                      |          |          | 314  | 131 | 314.0000   | 183.1917 |                                                     |                         |    |    |   |   |   |   |
| FN0177  |                        |                      |          |          |      | 10  |            | 12.9490  | AAL94383.1  Cell division inhibitor MinE            |                         |    |    |   |   |   |   |
|         |                        |                      |          |          |      | 12  |            | 16.7809  |                                                     |                         |    |    |   |   |   |   |
| FN0178  | -1.525                 | 11.866               | 9.301e-7 | 1.343e-7 | 30   | 78  | 39.0485    | 101.0022 | AAL94384.1  UNC-44 ankyrins                         |                         |    |    |   |   |   |   |
|         |                        |                      |          |          | 33   | 76  | 33.0000    | 106.2791 |                                                     |                         |    |    |   |   |   |   |
| FN0179  | -0.200                 | 10.006               | 8.015e-2 | 4.63e-1  | 16   | 25  | 20.8259    | 32.3725  | AAL94385.1  Ankyrin repeat proteins                 |                         |    |    |   |   |   |   |
|         |                        |                      |          |          | 39   | 26  | 39.0000    | 36.3587  |                                                     |                         |    |    |   |   |   |   |
| FN0180  |                        |                      |          |          | 4    |     | 5.2065     |          | AAL94386.1  Tetratricopeptide repeat family protein |                         |    |    |   |   |   |   |
|         |                        |                      |          |          | 6    |     | 6.0000     |          |                                                     |                         |    |    |   |   |   |   |
| FN0181  | 0.505                  | 9.734                | 1.944e-2 | 9.927e-2 | 25   | 13  | 32.5404    | 16.8337  | AAL94387.1  Hypothetical protein                    |                         |    |    |   |   |   |   |
|         |                        |                      |          |          | 37   | 23  | 37.0000    | 32.1634  |                                                     |                         |    |    |   |   |   |   |
| FN0182  | 3.099                  | 15.422               | 3.534e-7 | 3.74e-8  | 474  | 49  | 616.9663   | 63.4501  | AAL94388.1  Sarcosine oxidase alpha subunit         |                         |    |    |   |   |   |   |
|         |                        |                      |          |          | 610  | 57  | 610.0000   | 79.7094  |                                                     |                         |    |    |   |   |   |   |
| FN0183  | 1.523                  | 15.550               | 3.969e-5 | 4.325e-5 | 274  | 97  | 356.6429   | 125.6053 | AAL94389.1  Glycerol-3-phosphate dehydrogenase      |                         |    |    |   |   |   |   |
|         |                        |                      |          |          | 386  | 95  | 386.0000   | 132.8489 |                                                     |                         |    |    |   |   |   |   |
| FN0185  | 0.084                  | 8.597                | 1.319e-1 | 8.073e-1 | 15   | 9   | 19.5242    | 11.6541  | AAL94391.1  Hypothetical protein                    |                         |    |    |   |   |   |   |
|         |                        |                      |          |          | 21   | 19  | 21.0000    | 26.5698  |                                                     |                         |    |    |   |   |   |   |
| FN0188  |                        |                      |          |          |      | 13  |            | 16.8337  | AAL94394.1  Peptide methionine sulfoxide reductase  |                         |    |    |   |   |   |   |
|         |                        |                      |          |          |      |     |            |          |                                                     |                         |    |    |   |   |   |   |
| FN0189  |                        |                      |          |          | 12   |     | 15.6194    |          | AAL94395.1  Two-component response regulator yesN   |                         |    |    |   |   |   |   |
|         |                        |                      |          |          | 12   |     | 12.0000    |          |                                                     |                         |    |    |   |   |   |   |
| FN0190  | -0.535                 | 6.047                |          |          | 5    |     | 6.5081     |          | AAL94396.1  Two-component sensor kinase yesM        |                         |    |    |   |   |   |   |
|         |                        |                      |          |          | 7    | 7   | 7.0000     | 9.7889   |                                                     |                         |    |    |   |   |   |   |
| FN0191  | 0.605                  | 9.874                | 1.279e-2 | 6.207e-2 | 35   | 20  | 45.5566    | 25.8980  | AAL94397.1  helix-turn-helix DNA-binding protein    |                         |    |    |   |   |   |   |
|         |                        |                      |          |          | 30   | 17  | 30.0000    | 23.7730  |                                                     |                         |    |    |   |   |   |   |
| FN0192  | -2.532                 | 11.379               | 5.468e-5 | 6.886e-5 | 13   | 88  | 16.9210    | 113.9512 | AAL94398.1  Dipeptide-binding protein               |                         |    |    |   |   |   |   |
|         |                        |                      |          |          | 26   | 96  | 26.0000    | 134.2473 |                                                     |                         |    |    |   |   |   |   |
| FN0197  | -0.162                 | 4.806                |          |          |      |     |            |          | AAL94403.1  Methyltransferase                       |                         |    |    |   |   |   |   |
|         |                        |                      |          |          | 5    | 4   | 5.0000     | 5.5936   |                                                     |                         |    |    |   |   |   |   |

Show detected proteins only  
 Show all proteins  
 Filter by category:

Proteins found:  
1358

Test Cutoff

| Signif | Direction | Applies To   |
|--------|-----------|--------------|
| yes    | +         | ratios, bars |
| no     | n/a       | bars         |
| yes    | -         | ratios, bars |
| yes    | +         | p-, q-Values |
| yes    | -         | p-, q-Values |

Fn Summary Table FnPg vs Fn FnSg vs Fn FnPgSg vs Fn FnPgSg vs FnPg FnSg vs FnPg FnPgSg vs FnSg Fn Coverage

| Protein | FnSg vs Fn             |                      |          |          | Raw  |      | Normalized |           | Description                                                                 | Log <sub>2</sub> Ratios |    |    |   |   |   |   |
|---------|------------------------|----------------------|----------|----------|------|------|------------|-----------|-----------------------------------------------------------------------------|-------------------------|----|----|---|---|---|---|
|         | Log <sub>2</sub> Ratio | Log <sub>2</sub> Sum | q-Value  | p-Value  | FnSg | Fn   | FnSg       | Fn        |                                                                             | -6                      | -4 | -2 | 0 | 2 | 4 | 6 |
| FN0198  |                        |                      |          |          |      | 6    |            | 7.7694    | AAL94404.1  Transcriptional regulatory protein                              |                         |    |    |   |   |   |   |
|         |                        |                      |          |          |      | 4    |            | 5.5936    |                                                                             |                         |    |    |   |   |   |   |
| FN0199  | 0.776                  | 11.484               | 1.755e-4 | 3.272e-4 | 50   | 34   | 65.0808    | 44.0266   | AAL94405.1  Hypothetical protein                                            |                         |    |    |   |   |   |   |
|         |                        |                      |          |          | 75   | 27   | 75.0000    | 37.7571   |                                                                             |                         |    |    |   |   |   |   |
| FN0200  | -2.133                 | 19.975               | 1.742e-7 | 1.324e-8 | 385  | 1665 | 501.1224   | 2156.0089 | AAL94406.1  Biotin carboxyl carrier protein of glutaconyl-CoA decarboxylase |                         |    |    |   |   |   |   |
|         |                        |                      |          |          | 468  | 1499 | 468.0000   | 2096.2162 |                                                                             |                         |    |    |   |   |   |   |
| FN0202  | -0.967                 | 19.622               | 6.741e-5 | 9.332e-5 | 454  | 1032 | 590.9339   | 1336.3371 | AAL94408.1  Glutaconate CoA-transferase subunit A                           |                         |    |    |   |   |   |   |
|         |                        |                      |          |          | 694  | 840  | 694.0000   | 1174.6642 |                                                                             |                         |    |    |   |   |   |   |
| FN0203  | -0.582                 | 20.663               | 7.506e-4 | 2.098e-3 | 730  | 1114 | 950.1801   | 1442.5189 | AAL94409.1  Glutaconate CoA-transferase subunit B                           |                         |    |    |   |   |   |   |
|         |                        |                      |          |          | 1156 | 1223 | 1156.0000  | 1710.2551 |                                                                             |                         |    |    |   |   |   |   |
| FN0204  | -0.312                 | 21.692               | 7.16e-3  | 3.155e-2 | 1129 | 1600 | 1469.5251  | 2071.8404 | AAL94410.1  Glutaconyl-CoA decarboxylase A subunit                          |                         |    |    |   |   |   |   |
|         |                        |                      |          |          | 1835 | 1452 | 1835.0000  | 2030.4909 |                                                                             |                         |    |    |   |   |   |   |
| FN0206  | -1.164                 | 12.032               | 2.516e-4 | 5.09e-4  | 38   | 74   | 49.4614    | 95.8226   | AAL94412.1  Activator of (R)-2-hydroxyglutaryl-CoA dehydratase              |                         |    |    |   |   |   |   |
|         |                        |                      |          |          | 37   | 70   | 37.0000    | 97.8887   |                                                                             |                         |    |    |   |   |   |   |
| FN0207  | -0.565                 | 18.986               | 1.392e-5 | 9.757e-6 | 444  | 681  | 577.9178   | 881.8271  | AAL94413.1  (R)-2-hydroxyglutaryl-CoA dehydratase alpha-subunit             |                         |    |    |   |   |   |   |
|         |                        |                      |          |          | 607  | 623  | 607.0000   | 871.2093  |                                                                             |                         |    |    |   |   |   |   |
| FN0208  | -0.732                 | 17.742               | 3.443e-4 | 7.682e-4 | 254  | 461  | 330.6106   | 596.9490  | AAL94414.1  (R)-2-hydroxyglutaryl-CoA dehydratase beta-subunit              |                         |    |    |   |   |   |   |
|         |                        |                      |          |          | 396  | 436  | 396.0000   | 609.7066  |                                                                             |                         |    |    |   |   |   |   |
| FN0209  | -0.604                 | 17.952               | 5.39e-3  | 2.255e-2 | 248  | 486  | 322.8009   | 629.3215  | AAL94415.1  Hypothetical cytosolic protein                                  |                         |    |    |   |   |   |   |
|         |                        |                      |          |          | 494  | 438  | 494.0000   | 612.5035  |                                                                             |                         |    |    |   |   |   |   |
| FN0212  | -0.493                 | 8.850                | 1.5e-3   | 4.861e-3 | 14   | 21   | 18.2226    | 27.1929   | AAL94418.1  Hypothetical protein                                            |                         |    |    |   |   |   |   |
|         |                        |                      |          |          | 18   | 17   | 18.0000    | 23.7730   |                                                                             |                         |    |    |   |   |   |   |
| FN0218  | -0.964                 | 13.314               | 7.957e-5 | 1.179e-4 | 48   | 114  | 62.4776    | 147.6186  | AAL94424.1  Anthranilate synthase component II                              |                         |    |    |   |   |   |   |
|         |                        |                      |          |          | 82   | 96   | 82.0000    | 134.2473  |                                                                             |                         |    |    |   |   |   |   |
| FN0219  | 1.435                  | 6.180                |          |          |      | 4    |            | 5.1796    | AAL94425.1  Autolysin response regulator                                    |                         |    |    |   |   |   |   |
|         |                        |                      |          |          | 14   |      | 14.0000    |           |                                                                             |                         |    |    |   |   |   |   |
| FN0221  | -0.581                 | 10.846               | 2.334e-5 | 2.036e-5 | 27   | 40   | 35.1436    | 51.7960   | AAL94427.1  Carbon starvation protein A                                     |                         |    |    |   |   |   |   |
|         |                        |                      |          |          | 35   | 38   | 35.0000    | 53.1396   |                                                                             |                         |    |    |   |   |   |   |
| FN0224  | -1.410                 | 8.676                | 1.294e-3 | 4.071e-3 | 6    | 25   | 7.8097     | 32.3725   | AAL94430.1  Excinuclease ABC subunit B                                      |                         |    |    |   |   |   |   |
|         |                        |                      |          |          | 17   | 24   | 17.0000    | 33.5618   |                                                                             |                         |    |    |   |   |   |   |
| FN0225  |                        |                      |          |          |      |      |            |           | AAL94431.1  Gluconate permease                                              |                         |    |    |   |   |   |   |
|         |                        |                      |          |          | 3    |      | 3.0000     |           |                                                                             |                         |    |    |   |   |   |   |

Show detected proteins only  
 Show all proteins  
 Filter by category:

Proteins found: 1358

Test Cutoff

| Signif | Direction | Applies To   |
|--------|-----------|--------------|
| yes    | +         | ratios, bars |
| no     | n/a       | bars         |
| yes    | -         | ratios, bars |
| yes    | +         | p-, q-Values |
| yes    | -         | p-, q-Values |



Fn Summary Table FnPg vs Fn FnSg vs Fn FnPgSg vs Fn FnPgSg vs FnPg FnSg vs FnPg FnPgSg vs FnSg Fn Coverage

| Protein | FnSg vs Fn             |                      |          |          | Raw  |     | Normalized |          | Description                                               | Log <sub>2</sub> Ratios |    |    |   |   |   |   |
|---------|------------------------|----------------------|----------|----------|------|-----|------------|----------|-----------------------------------------------------------|-------------------------|----|----|---|---|---|---|
|         | Log <sub>2</sub> Ratio | Log <sub>2</sub> Sum | q-Value  | p-Value  | FnSg | Fn  | FnSg       | Fn       |                                                           | -6                      | -4 | -2 | 0 | 2 | 4 | 6 |
| FN0226  | -1.034                 | 11.561               | 2.8e-4   | 5.852e-4 | 26   | 61  | 33.8420    | 78.9889  | AAL94432.1  Pyridoxal phosphate biosynthetic protein pdxA |                         |    |    |   |   |   |   |
|         |                        |                      |          |          | 43   | 56  | 43.0000    | 78.3109  |                                                           |                         |    |    |   |   |   |   |
| FN0227  |                        |                      |          |          | 5    |     |            | 5.0000   | AAL94433.1  Hypothetical protein                          |                         |    |    |   |   |   |   |
|         |                        |                      |          |          |      |     |            |          |                                                           |                         |    |    |   |   |   |   |
| FN0233  | -0.734                 | 12.106               | 2.775e-4 | 5.783e-4 | 43   | 61  | 55.9695    | 78.9889  | AAL94439.1  Hypothetical protein                          |                         |    |    |   |   |   |   |
|         |                        |                      |          |          | 47   | 66  | 47.0000    | 92.2950  |                                                           |                         |    |    |   |   |   |   |
| FN0234  | -0.310                 | 7.958                | 1.264e-2 | 6.125e-2 | 11   | 12  | 14.3178    | 15.5388  | AAL94440.1  unknown                                       |                         |    |    |   |   |   |   |
|         |                        |                      |          |          | 14   | 14  | 14.0000    | 19.5777  |                                                           |                         |    |    |   |   |   |   |
| FN0236  | -1.222                 | 14.608               | 2.996e-4 | 6.409e-4 | 76   | 172 | 98.9229    | 222.7228 | AAL94442.1  ABC transporter substrate-binding protein     |                         |    |    |   |   |   |   |
|         |                        |                      |          |          | 108  | 186 | 108.0000   | 260.1042 |                                                           |                         |    |    |   |   |   |   |
| FN0238  | -1.033                 | 10.270               | 1.535e-4 | 2.777e-4 | 17   | 42  | 22.1275    | 54.3858  | AAL94444.1  Hypothetical protein                          |                         |    |    |   |   |   |   |
|         |                        |                      |          |          | 27   | 33  | 27.0000    | 46.1475  |                                                           |                         |    |    |   |   |   |   |
| FN0240  | -0.797                 | 12.601               | 8.865e-4 | 2.574e-3 | 55   | 87  | 71.5889    | 112.6563 | AAL94446.1  Thymidylate synthase                          |                         |    |    |   |   |   |   |
|         |                        |                      |          |          | 48   | 68  | 48.0000    | 95.0919  |                                                           |                         |    |    |   |   |   |   |
| FN0241  | 0.394                  | 9.714                | 2.811e-2 | 1.489e-1 | 28   | 25  | 36.4453    | 32.3725  | AAL94447.1  Dihydrofolate reductase                       |                         |    |    |   |   |   |   |
|         |                        |                      |          |          | 30   | 13  | 30.0000    | 18.1793  |                                                           |                         |    |    |   |   |   |   |
| FN0242  | 0.936                  | 13.142               | 2.68e-3  | 9.744e-3 | 116  | 50  | 150.9875   | 64.7450  | AAL94448.1  Trk system potassium uptake protein trkA      |                         |    |    |   |   |   |   |
|         |                        |                      |          |          | 112  | 52  | 112.0000   | 72.7173  |                                                           |                         |    |    |   |   |   |   |
| FN0243  | 0.487                  | 9.651                | 5.927e-2 | 3.348e-1 | 17   | 10  | 22.1275    | 12.9490  | AAL94449.1  Poly(A) polymerase                            |                         |    |    |   |   |   |   |
|         |                        |                      |          |          | 45   | 25  | 45.0000    | 34.9602  |                                                           |                         |    |    |   |   |   |   |
| FN0244  | -1.640                 | 7.571                |          |          | 6    | 16  | 7.8097     | 20.7184  | AAL94450.1  COP associated protein                        |                         |    |    |   |   |   |   |
|         |                        |                      |          |          |      | 20  |            | 27.9682  |                                                           |                         |    |    |   |   |   |   |
| FN0245  | -0.330                 | 7.699                | 2.374e-3 | 8.403e-3 | 9    | 12  | 11.7145    | 15.5388  | AAL94451.1  Copper-exporting ATPase                       |                         |    |    |   |   |   |   |
|         |                        |                      |          |          | 14   | 12  | 14.0000    | 16.7809  |                                                           |                         |    |    |   |   |   |   |
| FN0247  | -0.290                 | 15.475               | 6.662e-8 | 3.15e-9  | 149  | 183 | 193.9409   | 236.9667 | AAL94453.1  Hypothetical cytosolic protein                |                         |    |    |   |   |   |   |
|         |                        |                      |          |          | 192  | 168 | 192.0000   | 234.9328 |                                                           |                         |    |    |   |   |   |   |
| FN0248  |                        |                      |          |          | 28   |     | 36.4453    |          | AAL94454.1  Hypothetical Exported Protein                 |                         |    |    |   |   |   |   |
|         |                        |                      |          |          | 65   |     | 65.0000    |          |                                                           |                         |    |    |   |   |   |   |
| FN0249  | -1.817                 | 14.263               | 4.337e-4 | 1.021e-3 | 81   | 210 | 105.4309   | 271.9291 | AAL94455.1  unknown                                       |                         |    |    |   |   |   |   |
|         |                        |                      |          |          | 44   | 182 | 44.0000    | 254.5106 |                                                           |                         |    |    |   |   |   |   |
| FN0250  | -0.996                 | 13.556               | 3.358e-3 | 1.293e-2 | 81   | 113 | 105.4309   | 146.3237 | AAL94456.1  unknown                                       |                         |    |    |   |   |   |   |
|         |                        |                      |          |          | 50   | 117 | 50.0000    | 163.6139 |                                                           |                         |    |    |   |   |   |   |

Show detected proteins only  
 Show all proteins  
 Filter by category:

Proteins found: 1358

Enter (or paste) list of ORFs

Find ORFs

Test Cutoff

q-Value p-Value

.005

| Signif | Direction | Applies To   |
|--------|-----------|--------------|
| yes    | +         | ratios, bars |
| no     | n/a       | bars         |
| yes    | -         | ratios, bars |
| yes    | +         | p-, q-Values |
| yes    | -         | p-, q-Values |

Dot Plots Dot Plots

Fn Summary Table

FnPg vs Fn

FnSg vs Fn

FnPgSg vs Fn

FnPgSg vs FnPg

FnSg vs FnPg

FnPgSg vs FnSg

Fn Coverage

| Protein | FnSg vs Fn             |                      |          |          | Raw  |      | Normalized |           | Description                                                  | Log <sub>2</sub> Ratios |    |    |   |   |   |   |
|---------|------------------------|----------------------|----------|----------|------|------|------------|-----------|--------------------------------------------------------------|-------------------------|----|----|---|---|---|---|
|         | Log <sub>2</sub> Ratio | Log <sub>2</sub> Sum | q-Value  | p-Value  | FnSg | Fn   | FnSg       | Fn        |                                                              | -6                      | -4 | -2 | 0 | 2 | 4 | 6 |
| FN0251  | -2.496                 | 13.698               | 1.488e-4 | 2.659e-4 | 40   | 195  | 52.0647    | 252.5055  | AAL94457.1  Hypothetical membrane-spanning Protein           |                         |    |    |   |   |   |   |
|         |                        |                      |          |          | 45   | 211  | 45.0000    | 295.0644  |                                                              |                         |    |    |   |   |   |   |
| FN0252  | 0.575                  | 17.548               | 2.44e-4  | 4.894e-4 | 430  | 270  | 559.6951   | 349.6231  | AAL94458.1  unknown                                          |                         |    |    |   |   |   |   |
|         |                        |                      |          |          | 509  | 263  | 509.0000   | 367.7818  |                                                              |                         |    |    |   |   |   |   |
| FN0253  | 0.460                  | 16.509               | 4.768e-2 | 2.649e-1 | 180  | 198  | 234.2910   | 256.3902  | AAL94459.1  Outer membrane protein                           |                         |    |    |   |   |   |   |
|         |                        |                      |          |          | 482  | 189  | 482.0000   | 264.2994  |                                                              |                         |    |    |   |   |   |   |
| FN0254  | -1.035                 | 19.228               | 3.087e-6 | 9.382e-7 | 444  | 851  | 577.9178   | 1101.9601 | AAL94460.1  Fusobacterium outer membrane protein family      |                         |    |    |   |   |   |   |
|         |                        |                      |          |          | 517  | 816  | 517.0000   | 1141.1023 |                                                              |                         |    |    |   |   |   |   |
| FN0258  | -1.188                 | 6.803                |          |          |      | 16   |            | 20.7184   | AAL94464.1  Zinc-transporting ATPase                         |                         |    |    |   |   |   |   |
|         |                        |                      |          |          | 7    | 8    | 7.0000     | 11.1873   |                                                              |                         |    |    |   |   |   |   |
| FN0260  |                        |                      |          |          |      |      |            |           | AAL94466.1  Transcriptional repressor smtB                   |                         |    |    |   |   |   |   |
|         |                        |                      |          |          |      | 5    |            | 6.9920    |                                                              |                         |    |    |   |   |   |   |
| FN0261  | -1.840                 | 8.927                | 1.912e-5 | 1.542e-5 | 11   | 31   | 14.3178    | 40.1419   | AAL94467.1  Pyruvate formate-lyase activating enzyme         |                         |    |    |   |   |   |   |
|         |                        |                      |          |          | 9    | 31   | 9.0000     | 43.3507   |                                                              |                         |    |    |   |   |   |   |
| FN0262  | -2.335                 | 22.689               | 1.237e-5 | 8.314e-6 | 878  | 4406 | 1142.8193  | 5705.3305 | AAL94468.1  Formate acetyltransferase                        |                         |    |    |   |   |   |   |
|         |                        |                      |          |          | 1173 | 4274 | 1173.0000  | 5976.8031 |                                                              |                         |    |    |   |   |   |   |
| FN0263  | -1.850                 | 15.700               | 1.178e-5 | 7.68e-6  | 106  | 358  | 137.9714   | 463.5743  | AAL94469.1  Peptidyl-prolyl cis-trans isomerase              |                         |    |    |   |   |   |   |
|         |                        |                      |          |          | 105  | 295  | 105.0000   | 412.5309  |                                                              |                         |    |    |   |   |   |   |
| FN0264  | -0.960                 | 16.331               | 3.951e-3 | 1.586e-2 | 211  | 314  | 274.6411   | 406.5987  | AAL94470.1  Hypothetical protein                             |                         |    |    |   |   |   |   |
|         |                        |                      |          |          | 137  | 282  | 137.0000   | 394.3515  |                                                              |                         |    |    |   |   |   |   |
| FN0265  | -1.763                 | 7.956                | 4.807e-4 | 1.165e-3 | 7    | 20   | 9.1113     | 25.8980   | AAL94471.1  Cell division protein ftsX                       |                         |    |    |   |   |   |   |
|         |                        |                      |          |          | 8    | 23   | 8.0000     | 32.1634   |                                                              |                         |    |    |   |   |   |   |
| FN0266  |                        |                      |          |          |      | 14   |            | 18.1286   | AAL94472.1  membrane protein related to metalloendopeptidase |                         |    |    |   |   |   |   |
|         |                        |                      |          |          |      | 14   |            | 19.5777   |                                                              |                         |    |    |   |   |   |   |
| FN0267  | -0.436                 | 6.436                |          |          |      | 7    |            | 9.0643    | AAL94473.1  ATP-NAD kinase                                   |                         |    |    |   |   |   |   |
|         |                        |                      |          |          | 8    | 9    | 8.0000     | 12.5857   |                                                              |                         |    |    |   |   |   |   |
| FN0268  | 0.250                  | 8.535                |          |          |      | 10   |            | 12.9490   | AAL94474.1  DNA repair protein recN                          |                         |    |    |   |   |   |   |
|         |                        |                      |          |          | 21   | 16   | 21.0000    | 22.3746   |                                                              |                         |    |    |   |   |   |   |
| FN0270  | -1.169                 | 5.872                | 7.405e-4 | 2.059e-3 | 4    | 8    | 5.2065     | 10.3592   | AAL94476.1  GTP-binding protein era                          |                         |    |    |   |   |   |   |
|         |                        |                      |          |          | 5    | 9    | 5.0000     | 12.5857   |                                                              |                         |    |    |   |   |   |   |
| FN0271  | 0.093                  | 6.327                | 1.263e-1 | 7.684e-1 | 5    | 8    | 6.5081     | 10.3592   | AAL94477.1  Enoyl-CoA hydratase                              |                         |    |    |   |   |   |   |
|         |                        |                      |          |          | 12   | 5    | 12.0000    | 6.9920    |                                                              |                         |    |    |   |   |   |   |

Show detected proteins only  
 Show all proteins  
 Filter by category:

Proteins found: 1358

Test Cutoff

| Signif | Direction | Applies To   |
|--------|-----------|--------------|
| yes    | +         | ratios, bars |
| no     | n/a       | bars         |
| yes    | -         | ratios, bars |
| yes    | +         | p-, q-Values |
| yes    | -         | p-, q-Values |

Fn Summary Table FnPg vs Fn FnSg vs Fn FnPgSg vs Fn FnPgSg vs FnPg FnSg vs FnPg FnPgSg vs FnSg Fn Coverage

| Protein | FnSg vs Fn             |                      |          |          | Raw  |     | Normalized |          | Description                                                       | Log <sub>2</sub> Ratios |    |    |   |   |   |   |
|---------|------------------------|----------------------|----------|----------|------|-----|------------|----------|-------------------------------------------------------------------|-------------------------|----|----|---|---|---|---|
|         | Log <sub>2</sub> Ratio | Log <sub>2</sub> Sum | q-Value  | p-Value  | FnSg | Fn  | FnSg       | Fn       |                                                                   | -6                      | -4 | -2 | 0 | 2 | 4 | 6 |
| FN0272  | 0.588                  | 6.199                |          |          | 10   |     | 13.0162    |          | AAL94478.1  Acetoacetate: butyrate/acetate coenzyme A transferase |                         |    |    |   |   |   |   |
|         |                        |                      |          |          | 8    | 5   | 8.0000     | 6.9920   |                                                                   |                         |    |    |   |   |   |   |
| FN0273  |                        |                      |          |          | 4    |     | 5.2065     |          | AAL94479.1  Butyrate-acetoacetate CoA-transferase subunit B       |                         |    |    |   |   |   |   |
|         |                        |                      |          |          | 11   |     | 11.0000    |          |                                                                   |                         |    |    |   |   |   |   |
| FN0276  | 1.928                  | 9.815                |          |          | 50   |     | 65.0808    |          | AAL94482.1  Sodium-dependent phosphate transporter                |                         |    |    |   |   |   |   |
|         |                        |                      |          |          | 52   | 11  | 52.0000    | 15.3825  |                                                                   |                         |    |    |   |   |   |   |
| FN0277  | -0.494                 | 7.388                | 2.194e-2 | 1.134e-1 | 6    | 14  | 7.8097     | 18.1286  | AAL94483.1  Hypothetical protein                                  |                         |    |    |   |   |   |   |
|         |                        |                      |          |          | 14   | 9   | 14.0000    | 12.5857  |                                                                   |                         |    |    |   |   |   |   |
| FN0278  | -0.560                 | 15.924               | 4.407e-5 | 5.09e-5  | 158  | 230 | 205.6554   | 297.8271 | AAL94484.1  Xaa-His dipeptidase                                   |                         |    |    |   |   |   |   |
|         |                        |                      |          |          | 205  | 220 | 205.0000   | 307.6501 |                                                                   |                         |    |    |   |   |   |   |
| FN0279  | 1.561                  | 13.927               | 1.692e-4 | 3.134e-4 | 175  | 55  | 227.7829   | 71.2195  | AAL94485.1  Lipoprotein                                           |                         |    |    |   |   |   |   |
|         |                        |                      |          |          | 201  | 53  | 201.0000   | 74.1157  |                                                                   |                         |    |    |   |   |   |   |
| FN0280  | -0.787                 | 13.745               | 4.364e-5 | 5.015e-5 | 71   | 119 | 92.4148    | 154.0931 | AAL94486.1  Hypothetical protein                                  |                         |    |    |   |   |   |   |
|         |                        |                      |          |          | 86   | 110 | 86.0000    | 153.8251 |                                                                   |                         |    |    |   |   |   |   |
| FN0281  | 0.841                  | 13.430               | 6.426e-3 | 2.77e-2  | 87   | 64  | 113.2406   | 82.8736  | AAL94487.1  DNA polymerase III alpha subunit                      |                         |    |    |   |   |   |   |
|         |                        |                      |          |          | 168  | 53  | 168.0000   | 74.1157  |                                                                   |                         |    |    |   |   |   |   |
| FN0282  | 0.138                  | 11.307               | 6.655e-2 | 3.789e-1 | 45   | 32  | 58.5727    | 41.4368  | AAL94488.1  Hypothetical protein                                  |                         |    |    |   |   |   |   |
|         |                        |                      |          |          | 47   | 39  | 47.0000    | 54.5380  |                                                                   |                         |    |    |   |   |   |   |
| FN0283  | -1.636                 | 7.976                |          |          |      |     |            |          | AAL94489.1  tRNA (Guanine-N1) - methyltransferase                 |                         |    |    |   |   |   |   |
|         |                        |                      |          |          | 9    | 20  | 9.0000     | 27.9682  |                                                                   |                         |    |    |   |   |   |   |
| FN0284  | 1.667                  | 9.668                | 1.303e-3 | 4.103e-3 | 32   | 15  | 41.6517    | 19.4235  | AAL94490.1  16S rRNA processing protein rimM                      |                         |    |    |   |   |   |   |
|         |                        |                      |          |          | 60   | 9   | 60.0000    | 12.5857  |                                                                   |                         |    |    |   |   |   |   |
| FN0285  |                        |                      |          |          |      | 4   |            | 5.1796   | AAL94491.1  RNA binding protein                                   |                         |    |    |   |   |   |   |
|         |                        |                      |          |          |      |     |            |          |                                                                   |                         |    |    |   |   |   |   |
| FN0287  | -0.460                 | 7.032                | 2.728e-2 | 1.441e-1 | 5    | 11  | 6.5081     | 14.2439  | AAL94493.1  Dimethyladenosine transferase                         |                         |    |    |   |   |   |   |
|         |                        |                      |          |          | 13   | 9   | 13.0000    | 12.5857  |                                                                   |                         |    |    |   |   |   |   |
| FN0288  | 0.674                  | 10.925               | 4.516e-5 | 5.287e-5 | 41   | 28  | 53.3663    | 36.2572  | AAL94494.1  Hypoxanthine-guanine phosphoribosyltransferase        |                         |    |    |   |   |   |   |
|         |                        |                      |          |          | 58   | 24  | 58.0000    | 33.5618  |                                                                   |                         |    |    |   |   |   |   |
| FN0291  | 0.253                  | 4.391                |          |          |      |     |            |          | AAL94497.1  Hemolysin                                             |                         |    |    |   |   |   |   |
|         |                        |                      |          |          | 5    | 3   | 5.0000     | 4.1952   |                                                                   |                         |    |    |   |   |   |   |
| FN0294  | -1.901                 | 14.385               | 2.457e-5 | 2.192e-5 | 71   | 212 | 92.4148    | 274.5189 | AAL94500.1  Transketolase subunit A                               |                         |    |    |   |   |   |   |
|         |                        |                      |          |          | 59   | 208 | 59.0000    | 290.8692 |                                                                   |                         |    |    |   |   |   |   |

Show detected proteins only  
 Show all proteins  
 Filter by category:

Proteins found: 1358

Test Cutoff

| Signif | Direction | Applies To   |
|--------|-----------|--------------|
| yes    | +         | ratios, bars |
| no     | n/a       | bars         |
| yes    | -         | ratios, bars |
| yes    | +         | p-, q-Values |
| yes    | -         | p-, q-Values |

Fn Summary Table

FnPg vs Fn

FnSg vs Fn

FnPgSg vs Fn

FnPgSg vs FnPg

FnSg vs FnPg

FnPgSg vs FnSg

Fn Coverage

| Protein | FnSg vs Fn             |                      |          |          | Raw  |     | Normalized |          | Description                                                            | Log <sub>2</sub> Ratios |    |    |   |   |
|---------|------------------------|----------------------|----------|----------|------|-----|------------|----------|------------------------------------------------------------------------|-------------------------|----|----|---|---|
|         | Log <sub>2</sub> Ratio | Log <sub>2</sub> Sum | q-Value  | p-Value  | FnSg | Fn  | FnSg       | Fn       |                                                                        | -6                      | -4 | -2 | 0 | 2 |
| FN0295  | -0.904                 | 14.198               | 1.199e-4 | 1.978e-4 | 71   | 146 | 92.4148    | 189.0554 | AAL94501.1  Transketolase                                              |                         |    |    |   |   |
|         |                        |                      |          |          | 108  | 133 | 108.0000   | 185.9885 |                                                                        |                         |    |    |   |   |
| FN0296  | 0.166                  | 11.396               | 6.794e-4 | 1.83e-3  | 43   | 39  | 55.9695    | 50.5011  | AAL94502.1  Hypothetical cytosolic protein                             |                         |    |    |   |   |
|         |                        |                      |          |          | 54   | 34  | 54.0000    | 47.5459  |                                                                        |                         |    |    |   |   |
| FN0297  | 1.165                  | 8.400                | 1.973e-3 | 6.701e-3 | 20   | 6   | 26.0323    | 7.7694   | AAL94503.1  ATPase associated with chromosome architecture/replication |                         |    |    |   |   |
|         |                        |                      |          |          | 29   | 12  | 29.0000    | 16.7809  |                                                                        |                         |    |    |   |   |
| FN0298  | 0.466                  | 15.903               | 6.287e-4 | 1.652e-3 | 225  | 173 | 292.8637   | 224.0177 | AAL94504.1  Histidyl-tRNA synthetase                                   |                         |    |    |   |   |
|         |                        |                      |          |          | 289  | 141 | 289.0000   | 197.1758 |                                                                        |                         |    |    |   |   |
| FN0299  | -0.265                 | 16.401               | 6.204e-4 | 1.623e-3 | 198  | 239 | 257.7201   | 309.4812 | AAL94505.1  Aspartyl-tRNA synthetase                                   |                         |    |    |   |   |
|         |                        |                      |          |          | 279  | 240 | 279.0000   | 335.6183 |                                                                        |                         |    |    |   |   |
| FN0305  |                        |                      |          |          |      |     |            |          | AAL94511.1  Iron(III) dicitrate-binding protein                        |                         |    |    |   |   |
|         |                        |                      |          |          |      | 3   |            | 4.1952   |                                                                        |                         |    |    |   |   |
| FN0308  | 0.247                  | 17.772               | 2.211e-3 | 7.692e-3 | 417  | 347 | 542.7741   | 449.3304 | AAL94514.1  Iron(III)-binding protein                                  |                         |    |    |   |   |
|         |                        |                      |          |          | 488  | 300 | 488.0000   | 419.5229 |                                                                        |                         |    |    |   |   |
| FN0309  |                        |                      |          |          |      |     |            |          | AAL94515.1  Iron(III)-transport system permease protein sfuB           |                         |    |    |   |   |
|         |                        |                      |          |          |      | 8   |            | 11.1873  |                                                                        |                         |    |    |   |   |
| FN0310  | -1.748                 | 13.044               | 7.401e-6 | 3.645e-6 | 44   | 123 | 57.2711    | 159.2727 | AAL94516.1  Iron(III)-transport ATP-binding protein sfuC               |                         |    |    |   |   |
|         |                        |                      |          |          | 43   | 127 | 43.0000    | 177.5980 |                                                                        |                         |    |    |   |   |
| FN0311  | 0.278                  | 14.409               | 2.202e-3 | 7.657e-3 | 132  | 100 | 171.8134   | 129.4900 | AAL94517.1  Anaerobic ribonucleoside-triphosphate reductase            |                         |    |    |   |   |
|         |                        |                      |          |          | 153  | 99  | 153.0000   | 138.4426 |                                                                        |                         |    |    |   |   |
| FN0313  | -0.127                 | 9.558                | 1.263e-1 | 7.682e-1 | 25   | 13  | 32.5404    | 16.8337  | AAL94519.1  16S rRNA m(5)C 967 methyltransferase                       |                         |    |    |   |   |
|         |                        |                      |          |          | 20   | 29  | 20.0000    | 40.5539  |                                                                        |                         |    |    |   |   |
| FN0314  |                        |                      |          |          | 9    |     | 11.7145    |          | AAL94520.1  Caffeoyl-CoA O-methyltransferase                           |                         |    |    |   |   |
|         |                        |                      |          |          | 9    |     | 9.0000     |          |                                                                        |                         |    |    |   |   |
| FN0315  |                        |                      |          |          | 5    |     | 6.5081     |          | AAL94521.1  Transcriptional regulator, AraC family                     |                         |    |    |   |   |
|         |                        |                      |          |          | 10   |     | 10.0000    |          |                                                                        |                         |    |    |   |   |
| FN0316  | -1.888                 | 8.548                | 1.29e-3  | 4.053e-3 | 7    | 24  | 9.1113     | 31.0776  | AAL94522.1  Hypothetical protein                                       |                         |    |    |   |   |
|         |                        |                      |          |          | 11   | 31  | 11.0000    | 43.3507  |                                                                        |                         |    |    |   |   |
| FN0317  | 1.397                  | 9.164                | 1.666e-6 | 3.453e-7 | 29   | 12  | 37.7469    | 15.5388  | AAL94523.1  Tryptophan synthase beta chain                             |                         |    |    |   |   |
|         |                        |                      |          |          | 40   | 10  | 40.0000    | 13.9841  |                                                                        |                         |    |    |   |   |
| FN0319  | -0.061                 | 6.574                | 1.346e-1 | 8.262e-1 | 7    | 10  | 9.1113     | 12.9490  | AAL94525.1  Citrate (pro-3S)-lyase ligase                              |                         |    |    |   |   |
|         |                        |                      |          |          | 10   | 5   | 10.0000    | 6.9920   |                                                                        |                         |    |    |   |   |

- Show detected proteins only
- Show all proteins

Filter by category:  
GO: amino acid transport

Proteins found:  
1358

Enter (or paste) list of ORFs

Find ORFs

Test

Cutoff

q-Value

p-Value

.005

| Signif | Direction | Applies To   |
|--------|-----------|--------------|
| yes    | +         | ratios, bars |
| no     | n/a       | bars         |
| yes    | -         | ratios, bars |
| yes    | +         | p-, q-Values |
| yes    | -         | p-, q-Values |

Dot Plots Dot Plots

Fn Summary Table FnPg vs Fn FnSg vs Fn FnPgSg vs Fn FnPgSg vs FnPg FnSg vs FnPg FnPgSg vs FnSg Fn Coverage

| Protein | FnSg vs Fn             |                      |          |          | Raw  |      |           |           | Normalized |    |      |    | Description | Log <sub>2</sub> Ratios |    |    |   |   |   |   |  |
|---------|------------------------|----------------------|----------|----------|------|------|-----------|-----------|------------|----|------|----|-------------|-------------------------|----|----|---|---|---|---|--|
|         | Log <sub>2</sub> Ratio | Log <sub>2</sub> Sum | q-Value  | p-Value  | FnSg | Fn   | FnSg      | Fn        | FnSg       | Fn | FnSg | Fn |             | -6                      | -4 | -2 | 0 | 2 | 4 | 6 |  |
| FN0320  | -1.308                 | 8.395                | 3.111e-4 | 6.747e-4 | 11   | 23   | 14.3178   | 29.7827   |            |    |      |    |             |                         |    |    |   |   |   |   |  |
|         |                        |                      |          |          | 9    | 20   | 9.0000    | 27.9682   |            |    |      |    |             |                         |    |    |   |   |   |   |  |
| FN0321  | 0.889                  | 14.701               | 4.346e-3 | 1.766e-2 | 140  | 101  | 182.2263  | 130.7849  |            |    |      |    |             |                         |    |    |   |   |   |   |  |
|         |                        |                      |          |          | 262  | 78   | 262.0000  | 109.0760  |            |    |      |    |             |                         |    |    |   |   |   |   |  |
| FN0322  | 0.336                  | 21.739               | 1.279e-2 | 6.211e-2 | 1816 | 1315 | 2363.7357 | 1702.7938 |            |    |      |    |             |                         |    |    |   |   |   |   |  |
|         |                        |                      |          |          | 1839 | 1164 | 1839.0000 | 1627.7489 |            |    |      |    |             |                         |    |    |   |   |   |   |  |
| FN0325  | -4.235                 | 8.235                |          |          |      | 58   |           | 75.1042   |            |    |      |    |             |                         |    |    |   |   |   |   |  |
|         |                        |                      |          |          | 4    | 54   | 4.0000    | 75.5141   |            |    |      |    |             |                         |    |    |   |   |   |   |  |
| FN0326  |                        |                      |          |          |      | 7    |           | 9.0643    |            |    |      |    |             |                         |    |    |   |   |   |   |  |
|         |                        |                      |          |          |      |      |           |           |            |    |      |    |             |                         |    |    |   |   |   |   |  |
| FN0327  | -1.747                 | 11.489               | 4.453e-4 | 1.056e-3 | 15   | 75   | 19.5242   | 97.1175   |            |    |      |    |             |                         |    |    |   |   |   |   |  |
|         |                        |                      |          |          | 39   | 71   | 39.0000   | 99.2871   |            |    |      |    |             |                         |    |    |   |   |   |   |  |
| FN0329  | -0.950                 | 17.849               | 1.405e-4 | 2.458e-4 | 243  | 528  | 316.2928  | 683.7073  |            |    |      |    |             |                         |    |    |   |   |   |   |  |
|         |                        |                      |          |          | 383  | 477  | 383.0000  | 667.0414  |            |    |      |    |             |                         |    |    |   |   |   |   |  |
| FN0330  | -1.857                 | 11.791               | 2.129e-4 | 4.128e-4 | 35   | 81   | 45.5566   | 104.8869  |            |    |      |    |             |                         |    |    |   |   |   |   |  |
|         |                        |                      |          |          | 17   | 87   | 17.0000   | 121.6616  |            |    |      |    |             |                         |    |    |   |   |   |   |  |
| FN0331  | -0.199                 | 12.270               | 2.748e-2 | 1.452e-1 | 57   | 58   | 74.1921   | 75.1042   |            |    |      |    |             |                         |    |    |   |   |   |   |  |
|         |                        |                      |          |          | 57   | 54   | 57.0000   | 75.5141   |            |    |      |    |             |                         |    |    |   |   |   |   |  |
| FN0332  |                        |                      |          |          | 13   |      | 16.9210   |           |            |    |      |    |             |                         |    |    |   |   |   |   |  |
|         |                        |                      |          |          | 8    |      | 8.0000    |           |            |    |      |    |             |                         |    |    |   |   |   |   |  |
| FN0333  |                        |                      |          |          | 5    |      | 6.5081    |           |            |    |      |    |             |                         |    |    |   |   |   |   |  |
|         |                        |                      |          |          | 9    |      | 9.0000    |           |            |    |      |    |             |                         |    |    |   |   |   |   |  |
| FN0334  | 0.615                  | 15.196               | 1.787e-3 | 5.959e-3 | 168  | 123  | 218.6716  | 159.2727  |            |    |      |    |             |                         |    |    |   |   |   |   |  |
|         |                        |                      |          |          | 261  | 110  | 261.0000  | 153.8251  |            |    |      |    |             |                         |    |    |   |   |   |   |  |
| FN0335  | 0.528                  | 21.589               | 2.478e-3 | 8.853e-3 | 1798 | 1093 | 2340.3066 | 1415.3260 |            |    |      |    |             |                         |    |    |   |   |   |   |  |
|         |                        |                      |          |          | 1925 | 1103 | 1925.0000 | 1542.4459 |            |    |      |    |             |                         |    |    |   |   |   |   |  |
| FN0336  | -1.423                 | 12.122               | 2.481e-4 | 5e-4     | 35   | 76   | 45.5566   | 98.4124   |            |    |      |    |             |                         |    |    |   |   |   |   |  |
|         |                        |                      |          |          | 36   | 86   | 36.0000   | 120.2632  |            |    |      |    |             |                         |    |    |   |   |   |   |  |
| FN0341  | -2.957                 | 9.423                | 2.092e-4 | 4.04e-4  | 6    | 62   | 7.8097    | 80.2838   |            |    |      |    |             |                         |    |    |   |   |   |   |  |
|         |                        |                      |          |          | 11   | 47   | 11.0000   | 65.7253   |            |    |      |    |             |                         |    |    |   |   |   |   |  |
| FN0342  | -0.833                 | 10.292               | 1.718e-2 | 8.673e-2 | 30   | 46   | 39.0485   | 59.5654   |            |    |      |    |             |                         |    |    |   |   |   |   |  |
|         |                        |                      |          |          | 14   | 25   | 14.0000   | 34.9602   |            |    |      |    |             |                         |    |    |   |   |   |   |  |

Show detected proteins only  
 Show all proteins  
 Filter by category:

Proteins found:  
1358

Test Cutoff

| Signif | Direction | Applies To   |
|--------|-----------|--------------|
| yes    | +         | ratios, bars |
| no     | n/a       | bars         |
| yes    | -         | ratios, bars |
| yes    | +         | p-, q-Values |
| yes    | -         | p-, q-Values |

Fn Summary Table FnPg vs Fn FnSg vs Fn FnPgSg vs Fn FnPgSg vs FnPg FnSg vs FnPg FnPgSg vs FnSg Fn Coverage

| Protein | FnSg vs Fn             |                      |          |          | Raw  |     |          |          | Normalized |    |      |    | Description | Log <sub>2</sub> Ratios |    |    |   |   |   |   |
|---------|------------------------|----------------------|----------|----------|------|-----|----------|----------|------------|----|------|----|-------------|-------------------------|----|----|---|---|---|---|
|         | Log <sub>2</sub> Ratio | Log <sub>2</sub> Sum | q-Value  | p-Value  | FnSg | Fn  | FnSg     | Fn       | FnSg       | Fn | FnSg | Fn |             | -6                      | -4 | -2 | 0 | 2 | 4 | 6 |
| FN0343  |                        |                      |          |          |      | 4   |          | 5.1796   |            |    |      |    |             |                         |    |    |   |   |   |   |
| FN0344  | -2.069                 | 5.239                |          |          |      |     |          |          |            |    |      |    |             |                         |    |    |   |   |   |   |
| FN0347  | -0.674                 | 12.887               | 4.826e-4 | 1.171e-3 | 49   | 78  | 63.7792  | 101.0022 |            |    |      |    |             |                         |    |    |   |   |   |   |
| FN0348  | -0.391                 | 16.381               | 1.208e-2 | 5.806e-2 | 233  | 279 | 303.2767 | 361.2772 |            |    |      |    |             |                         |    |    |   |   |   |   |
| FN0349  | 1.812                  | 8.670                | 3.665e-3 | 1.446e-2 | 22   | 8   | 28.6356  | 10.3592  |            |    |      |    |             |                         |    |    |   |   |   |   |
| FN0351  | -2.482                 | 12.351               | 3.184e-4 | 6.951e-4 | 27   | 117 | 35.1436  | 151.5033 |            |    |      |    |             |                         |    |    |   |   |   |   |
| FN0352  | -0.286                 | 11.121               | 3.59e-2  | 1.95e-1  | 38   | 47  | 49.4614  | 60.8603  |            |    |      |    |             |                         |    |    |   |   |   |   |
| FN0355  | -0.041                 | 15.483               | 1.287e-1 | 7.85e-1  | 189  | 170 | 246.0055 | 220.1330 |            |    |      |    |             |                         |    |    |   |   |   |   |
| FN0356  | -2.283                 | 8.658                |          |          | 7    | 35  | 9.1113   | 45.3215  |            |    |      |    |             |                         |    |    |   |   |   |   |
| FN0357  | -0.449                 | 7.657                | 4.661e-2 | 2.584e-1 | 11   | 17  | 14.3178  | 22.0133  |            |    |      |    |             |                         |    |    |   |   |   |   |
| FN0358  | -0.347                 | 18.121               | 1.156e-2 | 5.518e-2 | 420  | 470 | 546.6790 | 608.6031 |            |    |      |    |             |                         |    |    |   |   |   |   |
| FN0359  | -0.269                 | 12.511               | 2.135e-3 | 7.37e-3  | 57   | 68  | 74.1921  | 88.0532  |            |    |      |    |             |                         |    |    |   |   |   |   |
| FN0360  | 0.487                  | 14.273               | 2.811e-3 | 1.034e-2 | 140  | 95  | 182.2263 | 123.0155 |            |    |      |    |             |                         |    |    |   |   |   |   |
| FN0361  | -0.759                 | 10.265               | 9.707e-3 | 4.517e-2 | 13   | 37  | 16.9210  | 47.9113  |            |    |      |    |             |                         |    |    |   |   |   |   |
| FN0362  | -0.065                 | 11.135               | 1.364e-1 | 8.393e-1 | 29   | 49  | 37.7469  | 63.4501  |            |    |      |    |             |                         |    |    |   |   |   |   |
| FN0364  |                        |                      |          |          |      | 3   |          | 4.1952   |            |    |      |    |             |                         |    |    |   |   |   |   |

Show detected proteins only  
 Show all proteins  
 Filter by category:

Proteins found:  
1358

Test Cutoff

| Signif | Direction | Applies To   |
|--------|-----------|--------------|
| yes    | +         | ratios, bars |
| no     | n/a       | bars         |
| yes    | -         | ratios, bars |
| yes    | +         | p-, q-Values |
| yes    | -         | p-, q-Values |

Fn Summary Table

FnPg vs Fn

FnSg vs Fn

FnPgSg vs Fn

FnPgSg vs FnPg

FnSg vs FnPg

FnPgSg vs FnSg

Fn Coverage

| Protein | FnSg vs Fn             |                      |          |          | Raw  |     | Normalized |          | Description                                                    | Log <sub>2</sub> Ratios |    |    |   |   |   |   |
|---------|------------------------|----------------------|----------|----------|------|-----|------------|----------|----------------------------------------------------------------|-------------------------|----|----|---|---|---|---|
|         | Log <sub>2</sub> Ratio | Log <sub>2</sub> Sum | q-Value  | p-Value  | FnSg | Fn  | FnSg       | Fn       |                                                                | -6                      | -4 | -2 | 0 | 2 | 4 | 6 |
| FN0366  | -0.416                 | 15.974               | 6.335e-3 | 2.724e-2 | 193  | 228 | 251.2120   | 295.2373 | AAL94569.1  Phosphoglucosamine mutase                          |                         |    |    |   |   |   |   |
|         |                        |                      |          |          | 188  | 208 | 188.0000   | 290.8692 |                                                                |                         |    |    |   |   |   |   |
| FN0368  | -0.530                 | 12.567               | 2.842e-3 | 1.048e-2 | 42   | 69  | 54.6679    | 89.3481  | AAL94571.1  Adenylosuccinate lyase                             |                         |    |    |   |   |   |   |
|         |                        |                      |          |          | 75   | 70  | 75.0000    | 97.8887  |                                                                |                         |    |    |   |   |   |   |
| FN0370  | -0.772                 | 10.147               | 5.368e-3 | 2.244e-2 | 25   | 28  | 32.5404    | 36.2572  | AAL94573.1  Signal peptidase I                                 |                         |    |    |   |   |   |   |
|         |                        |                      |          |          | 19   | 37  | 19.0000    | 51.7412  |                                                                |                         |    |    |   |   |   |   |
| FN0371  | -2.901                 | 10.001               |          |          | 9    | 66  | 11.7145    | 85.4634  | AAL94574.1  Hypothetical protein                               |                         |    |    |   |   |   |   |
|         |                        |                      |          |          |      | 64  |            | 89.4982  |                                                                |                         |    |    |   |   |   |   |
| FN0374  | 2.077                  | 6.567                |          |          |      | 3   |            | 3.8847   | AAL94577.1  Single-stranded-DNA-specific exonuclease recJ      |                         |    |    |   |   |   |   |
|         |                        |                      |          |          | 20   | 4   | 20.0000    | 5.5936   |                                                                |                         |    |    |   |   |   |   |
| FN0375  | 1.101                  | 18.363               | 1.719e-3 | 5.694e-3 | 740  | 297 | 963.1963   | 384.5854 | AAL94578.1  Iron(III)-binding protein                          |                         |    |    |   |   |   |   |
|         |                        |                      |          |          | 738  | 292 | 738.0000   | 408.3356 |                                                                |                         |    |    |   |   |   |   |
| FN0376  | 1.150                  | 13.536               | 3.241e-4 | 7.114e-4 | 115  | 59  | 149.6859   | 76.3991  | AAL94579.1  Iron(III)-transport ATP-binding protein sfuC       |                         |    |    |   |   |   |   |
|         |                        |                      |          |          | 175  | 50  | 175.0000   | 69.9205  |                                                                |                         |    |    |   |   |   |   |
| FN0377  | -1.332                 | 5.976                |          |          |      |     |            |          | AAL94580.1  Iron(III)-transport system permease protein sfuB   |                         |    |    |   |   |   |   |
|         |                        |                      |          |          | 5    | 9   | 5.0000     | 12.5857  |                                                                |                         |    |    |   |   |   |   |
| FN0378  | -0.339                 | 6.134                | 7.115e-2 | 4.071e-1 | 3    | 7   | 3.9048     | 9.0643   | AAL94581.1  UDP-glucose 4-epimerase                            |                         |    |    |   |   |   |   |
|         |                        |                      |          |          | 11   | 7   | 11.0000    | 9.7889   |                                                                |                         |    |    |   |   |   |   |
| FN0379  | -1.155                 | 6.325                |          |          |      | 12  |            | 15.5388  | AAL94582.1  Hypothetical protein                               |                         |    |    |   |   |   |   |
|         |                        |                      |          |          | 6    | 8   | 6.0000     | 11.1873  |                                                                |                         |    |    |   |   |   |   |
| FN0380  |                        |                      |          |          |      | 26  |            | 33.6674  | AAL94583.1  unknown                                            |                         |    |    |   |   |   |   |
|         |                        |                      |          |          |      | 17  |            | 23.7730  |                                                                |                         |    |    |   |   |   |   |
| FN0381  |                        |                      |          |          |      | 15  |            | 19.4235  | AAL94584.1  unknown                                            |                         |    |    |   |   |   |   |
|         |                        |                      |          |          |      | 15  |            | 20.9761  |                                                                |                         |    |    |   |   |   |   |
| FN0382  |                        |                      |          |          |      | 8   |            | 10.3592  | AAL94585.1  Hypothetical protein                               |                         |    |    |   |   |   |   |
|         |                        |                      |          |          |      | 8   |            | 11.1873  |                                                                |                         |    |    |   |   |   |   |
| FN0383  |                        |                      |          |          |      | 7   |            | 9.0643   | AAL94586.1  Lipopolysaccharide N-acetylglucosaminyltransferase |                         |    |    |   |   |   |   |
|         |                        |                      |          |          |      | 10  |            | 13.9841  |                                                                |                         |    |    |   |   |   |   |
| FN0384  | -3.317                 | 7.723                | 2.241e-4 | 4.398e-4 | 4    | 32  | 5.2065     | 41.4368  | AAL94587.1  Hypothetical protein                               |                         |    |    |   |   |   |   |
|         |                        |                      |          |          | 4    | 36  | 4.0000     | 50.3427  |                                                                |                         |    |    |   |   |   |   |
| FN0386  |                        |                      |          |          |      | 12  |            | 15.5388  | AAL94589.1  Hypothetical protein                               |                         |    |    |   |   |   |   |
|         |                        |                      |          |          |      | 11  |            | 15.3825  |                                                                |                         |    |    |   |   |   |   |

- Show detected proteins only
- Show all proteins

Filter by category:  
GO: amino acid transport

Proteins found:  
1358

Enter (or paste) list of ORFs

Find ORFs

Test

q-Value

p-Value

Cutoff

.005

| Signif | Direction | Applies To   |
|--------|-----------|--------------|
| yes    | +         | ratios, bars |
| no     | n/a       | bars         |
| yes    | -         | ratios, bars |
| yes    | +         | p-, q-Values |
| yes    | -         | p-, q-Values |

Dot Plots Dot Plots

Fn Summary Table

FnPg vs Fn

FnSg vs Fn

FnPgSg vs Fn

FnPgSg vs FnPg

FnSg vs FnPg

FnPgSg vs FnSg

Fn Coverage

| Protein | FnSg vs Fn             |                      |          |          | Raw  |      | Normalized |           | Description                                                                  | Log <sub>2</sub> Ratios |    |    |   |   |   |   |
|---------|------------------------|----------------------|----------|----------|------|------|------------|-----------|------------------------------------------------------------------------------|-------------------------|----|----|---|---|---|---|
|         | Log <sub>2</sub> Ratio | Log <sub>2</sub> Sum | q-Value  | p-Value  | FnSg | Fn   | FnSg       | Fn        |                                                                              | -6                      | -4 | -2 | 0 | 2 | 4 | 6 |
| FN0387  | -2.598                 | 12.135               | 2.352e-4 | 4.672e-4 | 5    | 121  | 6.5081     | 156.6829  | AAL94590.1  Fusobacterium outer membrane protein family                      |                         |    |    |   |   |   |   |
|         |                        |                      |          |          | 48   | 124  | 48.0000    | 173.4028  |                                                                              |                         |    |    |   |   |   |   |
| FN0390  | 0.760                  | 11.704               | 2.097e-3 | 7.21e-3  | 64   | 34   | 83.3035    | 44.0266   | AAL94593.1  Hypothetical protein                                             |                         |    |    |   |   |   |   |
|         |                        |                      |          |          | 67   | 32   | 67.0000    | 44.7491   |                                                                              |                         |    |    |   |   |   |   |
| FN0391  | 0.573                  | 9.238                | 6.047e-5 | 7.95e-5  | 23   | 16   | 29.9372    | 20.7184   | AAL94594.1  Hydrolase (HAD superfamily)                                      |                         |    |    |   |   |   |   |
|         |                        |                      |          |          | 30   | 14   | 30.0000    | 19.5777   |                                                                              |                         |    |    |   |   |   |   |
| FN0392  | -1.839                 | 6.626                | 3.636e-5 | 3.78e-5  | 5    | 15   | 6.5081     | 19.4235   | AAL94595.1  Oxygen-independent coproporphyrinogen III oxidase                |                         |    |    |   |   |   |   |
|         |                        |                      |          |          | 4    | 13   | 4.0000     | 18.1793   |                                                                              |                         |    |    |   |   |   |   |
| FN0393  | 1.616                  | 8.281                | 3.461e-3 | 1.344e-2 | 29   | 8    | 37.7469    | 10.3592   | AAL94596.1  Polysaccharide deacetylase                                       |                         |    |    |   |   |   |   |
|         |                        |                      |          |          | 24   | 7    | 24.0000    | 9.7889    |                                                                              |                         |    |    |   |   |   |   |
| FN0394  | -0.481                 | 6.856                |          |          | 7    | 11   | 9.1113     | 14.2439   | AAL94597.1  Outer membrane protein                                           |                         |    |    |   |   |   |   |
|         |                        |                      |          |          |      | 8    |            | 11.1873   |                                                                              |                         |    |    |   |   |   |   |
| FN0396  | 0.640                  | 24.426               | 9.475e-3 | 4.386e-2 | 5397 | 2994 | 7024.8246  | 3876.9313 | AAL94599.1  Dipeptide-binding protein                                        |                         |    |    |   |   |   |   |
|         |                        |                      |          |          | 4827 | 2667 | 4827.0000  | 3729.5587 |                                                                              |                         |    |    |   |   |   |   |
| FN0397  | -0.015                 | 11.126               | 1.467e-1 | 9.138e-1 | 40   | 41   | 52.0647    | 53.0909   | AAL94600.1  Dipeptide transport permease protein dppB                        |                         |    |    |   |   |   |   |
|         |                        |                      |          |          | 42   | 30   | 42.0000    | 41.9523   |                                                                              |                         |    |    |   |   |   |   |
| FN0398  | -0.502                 | 12.128               | 1.843e-3 | 6.179e-3 | 38   | 56   | 49.4614    | 72.5144   | AAL94601.1  Dipeptide transport system permease protein dppC                 |                         |    |    |   |   |   |   |
|         |                        |                      |          |          | 63   | 62   | 63.0000    | 86.7014   |                                                                              |                         |    |    |   |   |   |   |
| FN0399  | -0.236                 | 15.770               | 3.738e-2 | 2.036e-1 | 138  | 178  | 179.6231   | 230.4922  | AAL94602.1  Dipeptide transport ATP-binding protein dppD                     |                         |    |    |   |   |   |   |
|         |                        |                      |          |          | 256  | 202  | 256.0000   | 282.4788  |                                                                              |                         |    |    |   |   |   |   |
| FN0400  | -0.487                 | 18.187               | 6.672e-4 | 1.787e-3 | 331  | 498  | 430.8351   | 644.8603  | AAL94603.1  Dipeptide transport ATP-binding protein dppF                     |                         |    |    |   |   |   |   |
|         |                        |                      |          |          | 492  | 464  | 492.0000   | 648.8621  |                                                                              |                         |    |    |   |   |   |   |
| FN0405  | -0.293                 | 13.086               | 7.528e-3 | 3.343e-2 | 58   | 86   | 75.4938    | 111.3614  | AAL94608.1  Tryptophanyl-tRNA synthetase                                     |                         |    |    |   |   |   |   |
|         |                        |                      |          |          | 93   | 68   | 93.0000    | 95.0919   |                                                                              |                         |    |    |   |   |   |   |
| FN0406  | -1.516                 | 11.223               | 5.528e-4 | 1.399e-3 | 16   | 64   | 20.8259    | 82.8736   | AAL94609.1  Alanine racemase, biosynthetic                                   |                         |    |    |   |   |   |   |
|         |                        |                      |          |          | 37   | 59   | 37.0000    | 82.5062   |                                                                              |                         |    |    |   |   |   |   |
| FN0407  | -1.735                 | 11.438               | 4.116e-5 | 4.583e-5 | 19   | 75   | 24.7307    | 97.1175   | AAL94610.1  Hypothetical protein                                             |                         |    |    |   |   |   |   |
|         |                        |                      |          |          | 33   | 68   | 33.0000    | 95.0919   |                                                                              |                         |    |    |   |   |   |   |
| FN0408  | -0.129                 | 13.191               | 4.838e-2 | 2.692e-1 | 76   | 86   | 98.9229    | 111.3614  | AAL94611.1  Acetyl-coenzyme A carboxylase carboxyl transferase subunit beta  |                         |    |    |   |   |   |   |
|         |                        |                      |          |          | 86   | 65   | 86.0000    | 90.8966   |                                                                              |                         |    |    |   |   |   |   |
| FN0409  | -0.987                 | 17.352               | 2.609e-6 | 6.883e-7 | 219  | 453  | 285.0540   | 586.5898  | AAL94612.1  Acetyl-coenzyme A carboxylase carboxyl transferase subunit alpha |                         |    |    |   |   |   |   |
|         |                        |                      |          |          | 296  | 404  | 296.0000   | 564.9575  |                                                                              |                         |    |    |   |   |   |   |

- Show detected proteins only
- Show all proteins

Filter by category:  
GO: amino acid transport

Proteins found:  
1358

Enter (or paste) list of ORFs

Find ORFs

Test

Cutoff

q-Value

p-Value

.005

| Signif | Direction | Applies To   |
|--------|-----------|--------------|
| yes    | +         | ratios, bars |
| no     | n/a       | bars         |
| yes    | -         | ratios, bars |
| yes    | +         | p-, q-Values |
| yes    | -         | p-, q-Values |

Dot Plots Dot Plots



Fn Summary Table

FnPg vs Fn

FnSg vs Fn

FnPgSg vs Fn

FnPgSg vs FnPg

FnSg vs FnPg

FnPgSg vs FnSg

Fn Coverage

| Protein       | FnSg vs Fn             |                      |          |          | Raw  |     |          |          | Normalized |    |    |   | Description | Log <sub>2</sub> Ratios |   |   |  |  |  |  |
|---------------|------------------------|----------------------|----------|----------|------|-----|----------|----------|------------|----|----|---|-------------|-------------------------|---|---|--|--|--|--|
|               | Log <sub>2</sub> Ratio | Log <sub>2</sub> Sum | q-Value  | p-Value  | FnSg | Fn  | FnSg     | Fn       |            |    |    |   |             |                         |   |   |  |  |  |  |
|               |                        |                      |          |          |      |     |          |          | -6         | -4 | -2 | 0 |             | 2                       | 4 | 6 |  |  |  |  |
| <b>FN0410</b> | -0.464                 | 14.068               | 6.416e-4 | 1.696e-3 | 80   | 120 | 104.1293 | 155.3880 |            |    |    |   |             |                         |   |   |  |  |  |  |
|               |                        |                      |          |          | 119  | 109 | 119.0000 | 152.4267 |            |    |    |   |             |                         |   |   |  |  |  |  |
| <b>FN0411</b> | 0.597                  | 7.565                |          |          | 13   |     | 16.9210  |          |            |    |    |   |             |                         |   |   |  |  |  |  |
|               |                        |                      |          |          |      | 8   |          | 11.1873  |            |    |    |   |             |                         |   |   |  |  |  |  |
| <b>FN0412</b> |                        |                      |          |          |      |     |          |          |            |    |    |   |             |                         |   |   |  |  |  |  |
|               |                        |                      |          |          |      | 10  |          | 13.9841  |            |    |    |   |             |                         |   |   |  |  |  |  |
| <b>FN0413</b> |                        |                      |          |          |      |     |          |          |            |    |    |   |             |                         |   |   |  |  |  |  |
|               |                        |                      |          |          |      | 3   |          | 3.8847   |            |    |    |   |             |                         |   |   |  |  |  |  |
| <b>FN0414</b> |                        |                      |          |          |      |     |          |          |            |    |    |   |             |                         |   |   |  |  |  |  |
|               |                        |                      |          |          |      | 4   |          | 4.0000   |            |    |    |   |             |                         |   |   |  |  |  |  |
| <b>FN0416</b> |                        |                      |          |          |      |     |          |          |            |    |    |   |             |                         |   |   |  |  |  |  |
|               |                        |                      |          |          |      | 18  |          | 23.3082  |            |    |    |   |             |                         |   |   |  |  |  |  |
| <b>FN0417</b> |                        |                      |          |          |      |     |          |          |            |    |    |   |             |                         |   |   |  |  |  |  |
|               | -2.598                 | 9.242                |          |          |      | 46  |          | 59.5654  |            |    |    |   |             |                         |   |   |  |  |  |  |
| <b>FN0418</b> |                        |                      |          |          |      |     |          |          |            |    |    |   |             |                         |   |   |  |  |  |  |
|               |                        |                      |          |          |      | 77  |          | 100.2245 |            |    |    |   |             |                         |   |   |  |  |  |  |
| <b>FN0419</b> |                        |                      |          |          |      |     |          |          |            |    |    |   |             |                         |   |   |  |  |  |  |
|               |                        |                      |          |          |      | 90  |          | 90.0000  |            |    |    |   |             |                         |   |   |  |  |  |  |
| <b>FN0420</b> |                        |                      |          |          |      |     |          |          |            |    |    |   |             |                         |   |   |  |  |  |  |
|               | -0.540                 | 6.849                |          |          |      | 6   | 10       | 7.8097   | 12.9490    |    |    |   |             |                         |   |   |  |  |  |  |
| <b>FN0421</b> |                        |                      |          |          |      |     |          |          |            |    |    |   |             |                         |   |   |  |  |  |  |
|               |                        |                      |          |          |      | 10  | 44       | 10.0000  | 61.5300    |    |    |   |             |                         |   |   |  |  |  |  |
| <b>FN0422</b> |                        |                      |          |          |      |     |          |          |            |    |    |   |             |                         |   |   |  |  |  |  |
|               | 1.325                  | 9.226                | 7.44e-3  | 3.298e-2 | 38   | 12  | 49.4614  | 15.5388  |            |    |    |   |             |                         |   |   |  |  |  |  |
| <b>FN0423</b> |                        |                      |          |          |      |     |          |          |            |    |    |   |             |                         |   |   |  |  |  |  |
|               |                        |                      |          |          |      | 28  | 11       | 28.0000  | 15.3825    |    |    |   |             |                         |   |   |  |  |  |  |
| <b>FN0424</b> |                        |                      |          |          |      |     |          |          |            |    |    |   |             |                         |   |   |  |  |  |  |
|               | 0.333                  | 9.614                | 2.941e-3 | 1.095e-2 | 26   | 18  | 33.8420  | 23.3082  |            |    |    |   |             |                         |   |   |  |  |  |  |
| <b>FN0425</b> |                        |                      |          |          |      |     |          |          |            |    |    |   |             |                         |   |   |  |  |  |  |
|               |                        |                      |          |          |      | 29  | 19       | 29.0000  | 26.5698    |    |    |   |             |                         |   |   |  |  |  |  |
| <b>FN0426</b> |                        |                      |          |          |      |     |          |          |            |    |    |   |             |                         |   |   |  |  |  |  |
|               | 0.151                  | 15.001               | 2.346e-2 | 1.22e-1  | 158  | 125 | 205.6554 | 161.8625 |            |    |    |   |             |                         |   |   |  |  |  |  |
| <b>FN0427</b> |                        |                      |          |          |      |     |          |          |            |    |    |   |             |                         |   |   |  |  |  |  |
|               |                        |                      |          |          |      | 176 | 130      | 176.0000 | 181.7933   |    |    |   |             |                         |   |   |  |  |  |  |
| <b>FN0428</b> |                        |                      |          |          |      |     |          |          |            |    |    |   |             |                         |   |   |  |  |  |  |
|               | 1.262                  | 8.485                | 7.005e-4 | 1.908e-3 | 22   | 7   | 28.6356  | 9.0643   |            |    |    |   |             |                         |   |   |  |  |  |  |
| <b>FN0429</b> |                        |                      |          |          |      |     |          |          |            |    |    |   |             |                         |   |   |  |  |  |  |
|               |                        |                      |          |          |      | 30  | 11       | 30.0000  | 15.3825    |    |    |   |             |                         |   |   |  |  |  |  |
| <b>FN0430</b> |                        |                      |          |          |      |     |          |          |            |    |    |   |             |                         |   |   |  |  |  |  |
|               | 1.988                  | 6.847                | 1.193e-3 | 3.68e-3  | 19   | 4   | 24.7307  | 5.1796   |            |    |    |   |             |                         |   |   |  |  |  |  |
| <b>FN0431</b> |                        |                      |          |          |      |     |          |          |            |    |    |   |             |                         |   |   |  |  |  |  |
|               |                        |                      |          |          |      | 18  | 4        | 18.0000  | 5.5936     |    |    |   |             |                         |   |   |  |  |  |  |
| <b>FN0432</b> |                        |                      |          |          |      |     |          |          |            |    |    |   |             |                         |   |   |  |  |  |  |
|               | 1.669                  | 9.837                | 1.307e-4 | 2.226e-4 | 46   | 10  | 59.8744  | 12.9490  |            |    |    |   |             |                         |   |   |  |  |  |  |
| <b>FN0433</b> |                        |                      |          |          |      |     |          |          |            |    |    |   |             |                         |   |   |  |  |  |  |
|               |                        |                      |          |          |      | 48  | 15       | 48.0000  | 20.9761    |    |    |   |             |                         |   |   |  |  |  |  |
| <b>FN0434</b> |                        |                      |          |          |      |     |          |          |            |    |    |   |             |                         |   |   |  |  |  |  |
|               | -0.086                 | 11.660               | 7.203e-2 | 4.125e-1 | 38   | 43  | 49.4614  | 55.6807  |            |    |    |   |             |                         |   |   |  |  |  |  |
| <b>FN0435</b> |                        |                      |          |          |      |     |          |          |            |    |    |   |             |                         |   |   |  |  |  |  |
|               |                        |                      |          |          |      | 61  | 44       | 61.0000  | 61.5300    |    |    |   |             |                         |   |   |  |  |  |  |

- Show detected proteins only  
 Show all proteins

Filter by category:  
 GO: amino acid transport

Proteins found:  
1358

Enter (or  
paste) list  
of ORFs

Find ORFs

Test

q-Value

p-Value

Cutoff

.005

| Signif | Direction | Applies To   |
|--------|-----------|--------------|
| yes    | +         | ratios, bars |
| no     | n/a       | bars         |
| yes    | -         | ratios, bars |
| yes    | +         | p-, q-Values |
| yes    | -         | p-, q-Values |

Dot Plots

Dot Plots

Fn Summary Table FnPg vs Fn FnSg vs Fn FnPgSg vs Fn FnPgSg vs FnPg FnSg vs FnPg FnPgSg vs FnSg Fn Coverage

| Protein | FnSg vs Fn             |                      |          |          | Raw  |     | Normalized |          | Description                                                                  | Log <sub>2</sub> Ratios |    |    |   |   |
|---------|------------------------|----------------------|----------|----------|------|-----|------------|----------|------------------------------------------------------------------------------|-------------------------|----|----|---|---|
|         | Log <sub>2</sub> Ratio | Log <sub>2</sub> Sum | q-Value  | p-Value  | FnSg | Fn  | FnSg       | Fn       |                                                                              | -6                      | -4 | -2 | 0 | 2 |
| FN0430  | -0.701                 | 15.787               | 1.786e-4 | 3.339e-4 | 159  | 223 | 206.9570   | 288.7628 | AAL94633.1  LSU ribosomal protein L19P                                       |                         |    |    |   |   |
|         |                        |                      |          |          | 166  | 227 | 166.0000   | 317.4390 |                                                                              |                         |    |    |   |   |
| FN0435  | 0.052                  | 11.668               | 1.009e-1 | 5.961e-1 | 47   | 39  | 61.1760    | 50.5011  | AAL94634.1  Purine nucleoside phosphorylase                                  |                         |    |    |   |   |
|         |                        |                      |          |          | 55   | 44  | 55.0000    | 61.5300  |                                                                              |                         |    |    |   |   |
| FN0436  | 1.333                  | 11.299               | 1.074e-2 | 5.071e-2 | 41   | 24  | 53.3663    | 31.0776  | AAL94635.1  regulator of kinase autophosphorylation inhibitor                |                         |    |    |   |   |
|         |                        |                      |          |          | 106  | 23  | 106.0000   | 32.1634  |                                                                              |                         |    |    |   |   |
| FN0437  | 0.806                  | 7.847                | 7.057e-4 | 1.927e-3 | 17   | 8   | 22.1275    | 10.3592  | AAL94636.1  kinase autophosphorylation inhibitor KipI                        |                         |    |    |   |   |
|         |                        |                      |          |          | 18   | 9   | 18.0000    | 12.5857  |                                                                              |                         |    |    |   |   |
| FN0438  |                        |                      |          |          |      | 9   |            | 12.5857  | AAL94637.1  transporter protein                                              |                         |    |    |   |   |
|         |                        |                      |          |          |      |     |            |          |                                                                              |                         |    |    |   |   |
| FN0439  | -0.040                 | 11.845               | 1.436e-1 | 8.912e-1 | 32   | 41  | 41.6517    | 53.0909  | AAL94638.1  Lactam utilization protein LAMB                                  |                         |    |    |   |   |
|         |                        |                      |          |          | 78   | 50  | 78.0000    | 69.9205  |                                                                              |                         |    |    |   |   |
| FN0445  | -0.008                 | 5.178                |          |          |      | 5   |            | 6.4745   | AAL94641.1  Hypothetical protein                                             |                         |    |    |   |   |
|         |                        |                      |          |          |      | 6   | 4          | 6.0000   |                                                                              |                         |    |    |   |   |
| FN0446  | 0.027                  | 8.501                | 1.438e-1 | 8.924e-1 | 18   | 14  | 23.4291    | 18.1286  | AAL94642.1  Hypothetical protein                                             |                         |    |    |   |   |
|         |                        |                      |          |          |      | 15  | 14         | 15.0000  |                                                                              |                         |    |    |   |   |
| FN0447  | 1.685                  | 6.516                | 9.326e-4 | 2.737e-3 | 11   | 5   | 14.3178    | 6.4745   | AAL94643.1  NIFS protein                                                     |                         |    |    |   |   |
|         |                        |                      |          |          | 20   | 3   | 20.0000    | 4.1952   |                                                                              |                         |    |    |   |   |
| FN0450  | -0.482                 | 10.411               | 4.827e-2 | 2.685e-1 | 18   | 22  | 23.4291    | 28.4878  | AAL94646.1  ABC transporter ATP-binding protein                              |                         |    |    |   |   |
|         |                        |                      |          |          | 39   | 42  | 39.0000    | 58.7332  |                                                                              |                         |    |    |   |   |
| FN0451  | -0.319                 | 6.512                | 3.795e-2 | 2.069e-1 | 7    | 10  | 9.1113     | 12.9490  | AAL94647.1  Hypothetical protein                                             |                         |    |    |   |   |
|         |                        |                      |          |          | 8    | 6   | 8.0000     | 8.3905   |                                                                              |                         |    |    |   |   |
| FN0452  | -1.837                 | 17.252               | 5.216e-6 | 2.031e-6 | 136  | 592 | 177.0199   | 766.5809 | AAL94648.1  Glucosamine--fructose-6-phosphate aminotransferase (isomerizing) |                         |    |    |   |   |
|         |                        |                      |          |          | 241  | 520 | 241.0000   | 727.1731 |                                                                              |                         |    |    |   |   |
| FN0453  | 0.296                  | 16.195               | 2.768e-3 | 1.014e-2 | 219  | 195 | 285.0540   | 252.5055 | AAL94649.1  Xaa-Pro aminopeptidase                                           |                         |    |    |   |   |
|         |                        |                      |          |          | 322  | 173 | 322.0000   | 241.9249 |                                                                              |                         |    |    |   |   |
| FN0454  | 1.417                  | 14.629               | 1.243e-3 | 3.873e-3 | 173  | 77  | 225.1797   | 99.7073  | AAL94650.1  Aldehyde dehydrogenase B                                         |                         |    |    |   |   |
|         |                        |                      |          |          | 295  | 68  | 295.0000   | 95.0919  |                                                                              |                         |    |    |   |   |
| FN0455  | 1.718                  | 16.964               | 4.709e-4 | 1.134e-3 | 547  | 150 | 711.9843   | 194.2350 | AAL94651.1  Rubrerythrin                                                     |                         |    |    |   |   |
|         |                        |                      |          |          | 585  | 143 | 585.0000   | 199.9726 |                                                                              |                         |    |    |   |   |
| FN0456  | -2.542                 | 10.127               | 1.164e-5 | 7.519e-6 | 9    | 62  | 11.7145    | 80.2838  | AAL94652.1  Hypothetical cytosolic protein                                   |                         |    |    |   |   |
|         |                        |                      |          |          | 16   | 58  | 16.0000    | 81.1078  |                                                                              |                         |    |    |   |   |

Show detected proteins only  
 Show all proteins  
 Filter by category:

Proteins found: 1358

Enter (or paste) list of ORFs

Find ORFs

Test Cutoff

q-Value p-Value

.005

| Signif | Direction | Applies To   |
|--------|-----------|--------------|
| yes    | +         | ratios, bars |
| no     | n/a       | bars         |
| yes    | -         | ratios, bars |
| yes    | +         | p-, q-Values |
| yes    | -         | p-, q-Values |

Dot Plots Dot Plots

Fn Summary Table FnPg vs Fn FnSg vs Fn FnPgSg vs Fn FnPgSg vs FnPg FnSg vs FnPg FnPgSg vs FnSg Fn Coverage

| Protein | FnSg vs Fn             |                      |          |          | Raw  |      | Normalized |           | Description                                                    | Log <sub>2</sub> Ratios |    |    |   |   |   |   |
|---------|------------------------|----------------------|----------|----------|------|------|------------|-----------|----------------------------------------------------------------|-------------------------|----|----|---|---|---|---|
|         | Log <sub>2</sub> Ratio | Log <sub>2</sub> Sum | q-Value  | p-Value  | FnSg | Fn   | FnSg       | Fn        |                                                                | -6                      | -4 | -2 | 0 | 2 | 4 | 6 |
| FN0458  | 0.808                  | 5.266                | 1.363e-2 | 6.682e-2 | 8    | 4    | 10.4129    | 5.1796    | AAL94654.1  Hypothetical Exported Protein                      |                         |    |    |   |   |   |   |
|         |                        |                      |          |          | 6    | 3    | 6.0000     | 4.1952    |                                                                |                         |    |    |   |   |   |   |
| FN0459  |                        |                      |          |          |      | 8    |            | 10.3592   | AAL94655.1  Hypothetical exported 24-amino acid repeat protein |                         |    |    |   |   |   |   |
|         |                        |                      |          |          |      | 8    |            | 11.1873   |                                                                |                         |    |    |   |   |   |   |
| FN0460  | -2.267                 | 9.924                | 2.218e-5 | 1.897e-5 | 8    | 57   | 10.4129    | 73.8093   | AAL94656.1  Delta-aminolevulinic acid dehydratase              |                         |    |    |   |   |   |   |
|         |                        |                      |          |          | 18   | 45   | 18.0000    | 62.9284   |                                                                |                         |    |    |   |   |   |   |
| FN0461  | -0.447                 | 16.045               | 3.707e-5 | 3.893e-5 | 177  | 227  | 230.3861   | 293.9424  | AAL94657.1  Probable sigma(54) modulation protein              |                         |    |    |   |   |   |   |
|         |                        |                      |          |          | 215  | 224  | 215.0000   | 313.2438  |                                                                |                         |    |    |   |   |   |   |
| FN0462  | 1.070                  | 12.379               | 5.154e-3 | 2.142e-2 | 98   | 40   | 127.5584   | 51.7960   | AAL94658.1  DNA mismatch repair protein mutL                   |                         |    |    |   |   |   |   |
|         |                        |                      |          |          | 84   | 35   | 84.0000    | 48.9443   |                                                                |                         |    |    |   |   |   |   |
| FN0465  | -0.612                 | 15.596               | 3.061e-3 | 1.151e-2 | 166  | 195  | 216.0683   | 252.5055  | AAL94661.1  Hypothetical protein                               |                         |    |    |   |   |   |   |
|         |                        |                      |          |          | 144  | 213  | 144.0000   | 297.8613  |                                                                |                         |    |    |   |   |   |   |
| FN0466  | 0.347                  | 17.710               | 9.443e-3 | 4.369e-2 | 446  | 323  | 580.5210   | 418.2528  | AAL94662.1  Lysyl-tRNA synthetase                              |                         |    |    |   |   |   |   |
|         |                        |                      |          |          | 464  | 288  | 464.0000   | 402.7420  |                                                                |                         |    |    |   |   |   |   |
| FN0469  |                        |                      |          |          |      |      |            |           | AAL94665.1  Copper homeostasis protein cutC                    |                         |    |    |   |   |   |   |
|         |                        |                      |          |          | 4    |      | 4.0000     |           |                                                                |                         |    |    |   |   |   |   |
| FN0470  | -0.411                 | 18.091               | 3.507e-3 | 1.366e-2 | 310  | 430  | 403.5011   | 556.8071  | AAL94666.1  Putative efflux pump component MtrF                |                         |    |    |   |   |   |   |
|         |                        |                      |          |          | 513  | 473  | 513.0000   | 661.4478  |                                                                |                         |    |    |   |   |   |   |
| FN0472  | 1.030                  | 23.996               | 1.242e-7 | 7.722e-9 | 4554 | 2271 | 5927.5618  | 2940.7185 | AAL94668.1  Flavodoxin                                         |                         |    |    |   |   |   |   |
|         |                        |                      |          |          | 5764 | 1990 | 5764.0000  | 2782.8353 |                                                                |                         |    |    |   |   |   |   |
| FN0474  | -0.688                 | 5.449                |          |          | 4    |      | 5.2065     |           | AAL94670.1  Acriflavin resistance protein B                    |                         |    |    |   |   |   |   |
|         |                        |                      |          |          |      | 6    | 8.3905     |           |                                                                |                         |    |    |   |   |   |   |
| FN0475  | -1.090                 | 11.110               | 3.04e-4  | 6.535e-4 | 28   | 53   | 36.4453    | 68.6297   | AAL94671.1  MIAB protein                                       |                         |    |    |   |   |   |   |
|         |                        |                      |          |          | 28   | 49   | 28.0000    | 68.5221   |                                                                |                         |    |    |   |   |   |   |
| FN0476  | 0.309                  | 12.427               | 8.648e-3 | 3.932e-2 | 57   | 49   | 74.1921    | 63.4501   | AAL94672.1  Transcription termination factor rho               |                         |    |    |   |   |   |   |
|         |                        |                      |          |          | 91   | 50   | 91.0000    | 69.9205   |                                                                |                         |    |    |   |   |   |   |
| FN0477  | -1.264                 | 11.449               | 3.036e-6 | 9.079e-7 | 24   | 65   | 31.2388    | 84.1685   | AAL94673.1  Cell wall endopeptidase family M23/M37             |                         |    |    |   |   |   |   |
|         |                        |                      |          |          | 37   | 57   | 37.0000    | 79.7094   |                                                                |                         |    |    |   |   |   |   |
| FN0478  | 1.215                  | 8.853                | 5.409e-8 | 1.765e-9 | 25   | 11   | 32.5404    | 14.2439   | AAL94674.1  GcpE protein                                       |                         |    |    |   |   |   |   |
|         |                        |                      |          |          | 33   | 10   | 33.0000    | 13.9841   |                                                                |                         |    |    |   |   |   |   |
| FN0479  |                        |                      |          |          | 9    |      | 11.7145    |           | AAL94675.1  RNA polymerase sigma-E factor                      |                         |    |    |   |   |   |   |
|         |                        |                      |          |          | 25   |      | 25.0000    |           |                                                                |                         |    |    |   |   |   |   |

Show detected proteins only  
 Show all proteins  
 Filter by category:

Proteins found:  
1358

Test Cutoff

| Signif | Direction | Applies To   |
|--------|-----------|--------------|
| yes    | +         | ratios, bars |
| no     | n/a       | bars         |
| yes    | -         | ratios, bars |
| yes    | +         | p-, q-Values |
| yes    | -         |              |

Fn Summary Table FnPg vs Fn FnSg vs Fn FnPgSg vs Fn FnPgSg vs FnPg FnSg vs FnPg FnPgSg vs FnSg Fn Coverage

| Protein | FnSg vs Fn             |                      |          |          | Raw  |      | Normalized |           | Description                                           | Log <sub>2</sub> Ratios |    |    |   |   |   |   |
|---------|------------------------|----------------------|----------|----------|------|------|------------|-----------|-------------------------------------------------------|-------------------------|----|----|---|---|---|---|
|         | Log <sub>2</sub> Ratio | Log <sub>2</sub> Sum | q-Value  | p-Value  | FnSg | Fn   | FnSg       | Fn        |                                                       | -6                      | -4 | -2 | 0 | 2 | 4 | 6 |
| FN0480  |                        |                      |          |          | 4    |      | 4.0000     |           | AAL94676.1  unknown                                   |                         |    |    |   |   |   |   |
| FN0481  | -1.008                 | 7.489                | 1.335e-2 | 6.525e-2 | 3    | 11   | 3.9048     | 14.2439   | AAL94677.1  unknown                                   |                         |    |    |   |   |   |   |
| FN0482  |                        |                      |          |          |      | 44   |            | 56.9756   | AAL94678.1  LSU ribosomal protein L31P                |                         |    |    |   |   |   |   |
| FN0483  | -1.286                 | 13.140               | 8.803e-6 | 4.795e-6 | 52   | 120  | 67.6841    | 155.3880  | AAL94679.1  Uracil phosphoribosyltransferase          |                         |    |    |   |   |   |   |
| FN0484  | -0.185                 | 6.561                |          |          | 7    | 8    | 9.1113     | 10.3592   | AAL94680.1  Lipase                                    |                         |    |    |   |   |   |   |
| FN0487  | -0.012                 | 20.576               | 1.472e-1 | 9.17e-1  | 1078 | 933  | 1403.1427  | 1208.1419 | AAL94683.1  2-hydroxyglutarate dehydrogenase          |                         |    |    |   |   |   |   |
| FN0488  | 0.468                  | 23.904               | 5.984e-3 | 2.547e-2 | 4005 | 2530 | 5212.9743  | 3276.0976 | AAL94684.1  NAD-specific glutamate dehydrogenase      |                         |    |    |   |   |   |   |
| FN0489  | -1.567                 | 7.907                |          |          |      | 25   |            | 32.3725   | AAL94685.1  Prolipoprotein diacylglycerol transferase |                         |    |    |   |   |   |   |
| FN0490  |                        |                      |          |          |      |      |            |           | AAL94686.1  Integral membrane protein                 |                         |    |    |   |   |   |   |
| FN0491  | 1.725                  | 13.527               | 1.111e-3 | 3.377e-3 | 123  | 61   | 160.0988   | 78.9889   | AAL94687.1  Alanine racemase                          |                         |    |    |   |   |   |   |
| FN0493  | -0.771                 | 8.440                | 8.499e-3 | 3.853e-2 | 15   | 16   | 19.5242    | 20.7184   | AAL94689.1  Hypothetical protein                      |                         |    |    |   |   |   |   |
| FN0494  | -2.331                 | 16.329               | 9.05e-6  | 5.001e-6 | 69   | 464  | 89.8115    | 600.8337  | AAL94690.1  Short chain dehydrogenase                 |                         |    |    |   |   |   |   |
| FN0495  | 0.783                  | 25.644               | 2.586e-6 | 6.78e-7  | 7402 | 4420 | 9634.5658  | 5723.4591 | AAL94691.1  Acetyl-CoA acetyltransferase              |                         |    |    |   |   |   |   |
| FN0496  |                        |                      |          |          |      |      |            |           | AAL94692.1  unknown                                   |                         |    |    |   |   |   |   |
| FN0501  | 1.084                  | 17.363               | 2.303e-4 | 4.551e-4 | 420  | 199  | 546.6790   | 257.6851  | AAL94697.1  Ornithine decarboxylase                   |                         |    |    |   |   |   |   |
| FN0502  | 1.003                  | 8.044                |          |          |      | 8    |            | 10.3592   | AAL94698.1  Phosphoheptose isomerase                  |                         |    |    |   |   |   |   |

Show detected proteins only  
 Show all proteins  
 Filter by category:

Proteins found: 1358

Test Cutoff

| Signif | Direction | Applies To   |
|--------|-----------|--------------|
| yes    | +         | ratios, bars |
| no     | n/a       | bars         |
| yes    | -         | ratios, bars |
| yes    | +         | p-, q-Values |
| yes    | -         |              |

Fn Summary Table FnPg vs Fn FnSg vs Fn FnPgSg vs Fn FnPgSg vs FnPg FnSg vs FnPg FnPgSg vs FnSg Fn Coverage

| Protein | FnSg vs Fn             |                      |          |          | Raw  |      | Normalized |           | Description                                                    | Log <sub>2</sub> Ratios |    |    |   |   |   |   |
|---------|------------------------|----------------------|----------|----------|------|------|------------|-----------|----------------------------------------------------------------|-------------------------|----|----|---|---|---|---|
|         | Log <sub>2</sub> Ratio | Log <sub>2</sub> Sum | q-Value  | p-Value  | FnSg | Fn   | FnSg       | Fn        |                                                                | -6                      | -4 | -2 | 0 | 2 | 4 | 6 |
| FN0503  | -0.224                 | 11.590               | 8.655e-3 | 3.936e-2 | 39   | 43   | 50.7630    | 55.6807   | AAL94699.1  Transcriptional regulatory protein, LYSR family    |                         |    |    |   |   |   |   |
|         |                        |                      |          |          | 52   | 46   | 52.0000    | 64.3268   |                                                                |                         |    |    |   |   |   |   |
| FN0505  | -0.293                 | 10.222               | 3.952e-2 | 2.162e-1 | 18   | 31   | 23.4291    | 40.1419   | AAL94701.1  Anthranilate synthase component II                 |                         |    |    |   |   |   |   |
|         |                        |                      |          |          | 39   | 26   | 39.0000    | 36.3587   |                                                                |                         |    |    |   |   |   |   |
| FN0506  | -1.284                 | 14.532               | 3.941e-5 | 4.277e-5 | 67   | 182  | 87.2083    | 235.6718  | AAL94702.1  Arginyl-tRNA synthetase                            |                         |    |    |   |   |   |   |
|         |                        |                      |          |          | 110  | 175  | 110.0000   | 244.7217  |                                                                |                         |    |    |   |   |   |   |
| FN0511  | 0.593                  | 11.550               | 2.722e-3 | 9.935e-3 | 58   | 30   | 75.4938    | 38.8470   | AAL94707.1  D-lactate dehydrogenase                            |                         |    |    |   |   |   |   |
|         |                        |                      |          |          | 59   | 36   | 59.0000    | 50.3427   |                                                                |                         |    |    |   |   |   |   |
| FN0512  | 0.226                  | 15.475               | 1.275e-3 | 3.995e-3 | 171  | 145  | 222.5764   | 187.7605  | AAL94708.1  Flavoprotein                                       |                         |    |    |   |   |   |   |
|         |                        |                      |          |          | 239  | 148  | 239.0000   | 206.9646  |                                                                |                         |    |    |   |   |   |   |
| FN0513  | -1.158                 | 9.508                | 5.895e-4 | 1.519e-3 | 17   | 32   | 22.1275    | 41.4368   | AAL94709.1  Flavodoxin                                         |                         |    |    |   |   |   |   |
|         |                        |                      |          |          | 14   | 28   | 14.0000    | 39.1555   |                                                                |                         |    |    |   |   |   |   |
| FN0515  | 0.321                  | 5.532                | 6.431e-2 | 3.652e-1 | 4    | 4    | 5.2065     | 5.1796    | AAL94711.1  Acriflavin resistance protein D                    |                         |    |    |   |   |   |   |
|         |                        |                      |          |          | 10   | 5    | 10.0000    | 6.9920    |                                                                |                         |    |    |   |   |   |   |
| FN0517  |                        |                      |          |          | 10   |      | 13.0162    |           | AAL94713.1  Outer membrane protein tolC                        |                         |    |    |   |   |   |   |
|         |                        |                      |          |          | 8    |      | 8.0000     |           |                                                                |                         |    |    |   |   |   |   |
| FN0519  | -0.386                 | 6.680                | 6.403e-2 | 3.635e-1 | 9    | 6    | 11.7145    | 7.7694    | AAL94715.1  Hypothetical exported 24-amino acid repeat protein |                         |    |    |   |   |   |   |
|         |                        |                      |          |          | 6    | 11   | 6.0000     | 15.3825   |                                                                |                         |    |    |   |   |   |   |
| FN0522  | 1.464                  | 6.626                | 2.139e-3 | 7.388e-3 | 10   | 6    | 13.0162    | 7.7694    | AAL94718.1  Exonuclease SBCC                                   |                         |    |    |   |   |   |   |
|         |                        |                      |          |          | 20   | 3    | 20.0000    | 4.1952    |                                                                |                         |    |    |   |   |   |   |
| FN0523  | -1.612                 | 7.522                | 1.603e-3 | 5.249e-3 | 5    | 15   | 6.5081     | 19.4235   | AAL94719.1  Exonuclease SBCD                                   |                         |    |    |   |   |   |   |
|         |                        |                      |          |          | 9    | 20   | 9.0000     | 27.9682   |                                                                |                         |    |    |   |   |   |   |
| FN0524  |                        |                      |          |          | 5    |      | 6.5081     |           | AAL94720.1  DNA helicase II                                    |                         |    |    |   |   |   |   |
|         |                        |                      |          |          | 12   |      | 12.0000    |           |                                                                |                         |    |    |   |   |   |   |
| FN0525  | -0.149                 | 15.969               | 6.84e-2  | 3.902e-1 | 219  | 196  | 285.0540   | 253.8004  | AAL94721.1  Penicillin-binding protein                         |                         |    |    |   |   |   |   |
|         |                        |                      |          |          | 196  | 200  | 196.0000   | 279.6819  |                                                                |                         |    |    |   |   |   |   |
| FN0526  | 0.275                  | 11.555               | 8.998e-3 | 4.123e-2 | 42   | 36   | 54.6679    | 46.6164   | AAL94722.1  Florfenicol resistance protein                     |                         |    |    |   |   |   |   |
|         |                        |                      |          |          | 66   | 38   | 66.0000    | 53.1396   |                                                                |                         |    |    |   |   |   |   |
| FN0527  | 1.118                  | 10.139               | 1.279e-3 | 4.01e-3  | 33   | 19   | 42.9533    | 24.6031   | AAL94723.1  Alanyl-tRNA synthetase                             |                         |    |    |   |   |   |   |
|         |                        |                      |          |          | 56   | 15   | 56.0000    | 20.9761   |                                                                |                         |    |    |   |   |   |   |
| FN0528  | -5.943                 | 15.825               | 2.971e-6 | 8.705e-7 | 28   | 1436 | 36.4453    | 1859.4768 | AAL94724.1  Cold shock protein                                 |                         |    |    |   |   |   |   |
|         |                        |                      |          |          | 25   | 1373 | 25.0000    | 1920.0165 |                                                                |                         |    |    |   |   |   |   |

Show detected proteins only  
 Show all proteins  
 Filter by category:

Proteins found: 1358

Test Cutoff

| Signif | Direction | Applies To   |
|--------|-----------|--------------|
| yes    | +         | ratios, bars |
| no     | n/a       | bars         |
| yes    | -         | ratios, bars |
| yes    | +         | p-, q-Values |
| yes    | -         |              |

Fn Summary Table FnPg vs Fn FnSg vs Fn FnPgSg vs Fn FnPgSg vs FnPg FnSg vs FnPg FnPgSg vs FnSg Fn Coverage

| Protein | FnSg vs Fn             |                      |          |          | Raw  |     | Normalized |          | Description                                                   | Log <sub>2</sub> Ratios |    |    |   |   |   |   |
|---------|------------------------|----------------------|----------|----------|------|-----|------------|----------|---------------------------------------------------------------|-------------------------|----|----|---|---|---|---|
|         | Log <sub>2</sub> Ratio | Log <sub>2</sub> Sum | q-Value  | p-Value  | FnSg | Fn  | FnSg       | Fn       |                                                               | -6                      | -4 | -2 | 0 | 2 | 4 | 6 |
| FN0535  | -0.144                 | 10.016               | 6.605e-2 | 3.758e-1 | 24   | 22  | 31.2388    | 28.4878  | AAL94731.1  Hypothetical protein                              |                         |    |    |   |   |   |   |
|         |                        |                      |          |          | 30   | 28  | 30.0000    | 39.1555  |                                                               |                         |    |    |   |   |   |   |
| FN0536  | -0.290                 | 15.482               | 2.938e-3 | 1.093e-2 | 159  | 184 | 206.9570   | 238.2616 | AAL94732.1  DNA polymerase III, beta chain                    |                         |    |    |   |   |   |   |
|         |                        |                      |          |          | 180  | 168 | 180.0000   | 234.9328 |                                                               |                         |    |    |   |   |   |   |
| FN0540  | -0.525                 | 11.624               | 7.07e-4  | 1.932e-3 | 32   | 49  | 41.6517    | 63.4501  | AAL94736.1  Glutamate-1-semialdehyde 2,1-aminomutase          |                         |    |    |   |   |   |   |
|         |                        |                      |          |          | 52   | 51  | 52.0000    | 71.3189  |                                                               |                         |    |    |   |   |   |   |
| FN0541  | -0.612                 | 7.079                | 5.117e-2 | 2.862e-1 | 6    | 6   | 7.8097     | 7.7694   | AAL94737.1  polysaccharide deacetylase                        |                         |    |    |   |   |   |   |
|         |                        |                      |          |          | 11   | 15  | 11.0000    | 20.9761  |                                                               |                         |    |    |   |   |   |   |
| FN0542  | 1.042                  | 9.148                | 2.806e-3 | 1.032e-2 | 31   | 17  | 40.3501    | 22.0133  | AAL94738.1  Beta 1,4 glucosyltransferase                      |                         |    |    |   |   |   |   |
|         |                        |                      |          |          | 28   | 8   | 28.0000    | 11.1873  |                                                               |                         |    |    |   |   |   |   |
| FN0543  | -1.605                 | 9.994                | 5.674e-6 | 2.34e-6  | 12   | 45  | 15.6194    | 58.2705  | AAL94739.1  Lipopolysaccharide heptosyltransferase-1          |                         |    |    |   |   |   |   |
|         |                        |                      |          |          | 21   | 38  | 21.0000    | 53.1396  |                                                               |                         |    |    |   |   |   |   |
| FN0546  |                        |                      |          |          |      | 6   |            | 7.7694   | AAL94742.1  Lipopolysaccharide core biosynthesis protein rfaQ |                         |    |    |   |   |   |   |
|         |                        |                      |          |          |      |     |            |          |                                                               |                         |    |    |   |   |   |   |
| FN0547  | -0.434                 | 17.816               | 9.961e-5 | 1.555e-4 | 304  | 425 | 395.6914   | 550.3326 | AAL94743.1  RecA protein                                      |                         |    |    |   |   |   |   |
|         |                        |                      |          |          | 431  | 405 | 431.0000   | 566.3559 |                                                               |                         |    |    |   |   |   |   |
| FN0549  | 1.632                  | 5.769                |          |          |      |     |            |          | AAL94745.1  O-sialoglycoprotein endopeptidase                 |                         |    |    |   |   |   |   |
|         |                        |                      |          |          | 13   | 3   | 13.0000    | 4.1952   |                                                               |                         |    |    |   |   |   |   |
| FN0550  |                        |                      |          |          | 12   |     | 15.6194    |          | AAL94746.1  hypothetical Protein                              |                         |    |    |   |   |   |   |
|         |                        |                      |          |          | 10   |     | 10.0000    |          |                                                               |                         |    |    |   |   |   |   |
| FN0552  | 0.596                  | 8.994                | 2.955e-2 | 1.574e-1 | 15   | 10  | 19.5242    | 12.9490  | AAL94748.1  Serine racemase                                   |                         |    |    |   |   |   |   |
|         |                        |                      |          |          | 36   | 17  | 36.0000    | 23.7730  |                                                               |                         |    |    |   |   |   |   |
| FN0553  | 1.235                  | 14.471               | 3.442e-3 | 1.334e-2 | 144  | 75  | 187.4328   | 97.1175  | AAL94749.1  D-serine dehydratase                              |                         |    |    |   |   |   |   |
|         |                        |                      |          |          | 275  | 71  | 275.0000   | 99.2871  |                                                               |                         |    |    |   |   |   |   |
| FN0554  | 1.980                  | 6.947                |          |          | 17   |     | 22.1275    |          | AAL94750.1  D-serine permease                                 |                         |    |    |   |   |   |   |
|         |                        |                      |          |          | 22   | 4   | 22.0000    | 5.5936   |                                                               |                         |    |    |   |   |   |   |
| FN0555  |                        |                      |          |          | 6    |     | 7.8097     |          | AAL94751.1  Transcriptional regulator, MerR family            |                         |    |    |   |   |   |   |
|         |                        |                      |          |          |      |     |            |          |                                                               |                         |    |    |   |   |   |   |
| FN0556  | -0.711                 | 11.901               | 3.251e-4 | 7.142e-4 | 42   | 65  | 54.6679    | 84.1685  | AAL94752.1  unknown                                           |                         |    |    |   |   |   |   |
|         |                        |                      |          |          | 42   | 53  | 42.0000    | 74.1157  |                                                               |                         |    |    |   |   |   |   |
| FN0557  | 2.218                  | 13.666               | 4.033e-3 | 1.624e-2 | 242  | 46  | 314.9912   | 59.5654  | AAL94753.1  unknown                                           |                         |    |    |   |   |   |   |
|         |                        |                      |          |          | 177  | 33  | 177.0000   | 46.1475  |                                                               |                         |    |    |   |   |   |   |

Show detected proteins only  
 Show all proteins  
 Filter by category:

Proteins found: 1358

Test Cutoff

| Signif | Direction | Applies To   |
|--------|-----------|--------------|
| yes    | +         | ratios, bars |
| no     | n/a       | bars         |
| yes    | -         | ratios, bars |
| yes    | +         | p-, q-Values |
| yes    | -         |              |

Fn Summary Table

FnPg vs Fn

FnSg vs Fn

FnPgSg vs Fn

FnPgSg vs FnPg

FnSg vs FnPg

FnPgSg vs FnSg

Fn Coverage

| Protein | FnSg vs Fn             |                      |          |          | Raw  |     | Normalized |          | Description                                                                         | Log <sub>2</sub> Ratios |    |    |   |   |   |   |
|---------|------------------------|----------------------|----------|----------|------|-----|------------|----------|-------------------------------------------------------------------------------------|-------------------------|----|----|---|---|---|---|
|         | Log <sub>2</sub> Ratio | Log <sub>2</sub> Sum | q-Value  | p-Value  | FnSg | Fn  | FnSg       | Fn       |                                                                                     |                         |    |    |   |   |   |   |
|         |                        |                      |          |          |      |     |            |          |                                                                                     | -6                      | -4 | -2 | 0 | 2 | 4 | 6 |
| FN0558  | 0.685                  | 12.886               | 1.435e-2 | 7.097e-2 | 105  | 52  | 136.6697   | 67.3348  | AAL94754.1  TraT complement resistance protein precursor                            |                         |    |    |   |   |   |   |
|         |                        |                      |          |          | 84   | 50  | 84.0000    | 69.9205  |                                                                                     |                         |    |    |   |   |   |   |
| FN0559  | 0.719                  | 14.477               | 4.336e-6 | 1.524e-6 | 151  | 90  | 196.5441   | 116.5410 | AAL94755.1  Phosphoglucomutase                                                      |                         |    |    |   |   |   |   |
|         |                        |                      |          |          | 191  | 85  | 191.0000   | 118.8648 |                                                                                     |                         |    |    |   |   |   |   |
| FN0560  |                        |                      |          |          | 6    |     | 6.0000     |          | AAL94756.1  Oxygen-independent coproporphyrinogen III oxidase                       |                         |    |    |   |   |   |   |
|         |                        |                      |          |          |      |     |            |          |                                                                                     |                         |    |    |   |   |   |   |
| FN0561  | -0.899                 | 10.531               | 3.948e-5 | 4.288e-5 | 21   | 39  | 27.3339    | 50.5011  | AAL94757.1  Proline synthetase associated protein                                   |                         |    |    |   |   |   |   |
|         |                        |                      |          |          | 29   | 39  | 29.0000    | 54.5380  |                                                                                     |                         |    |    |   |   |   |   |
| FN0562  | -0.432                 | 13.848               | 6.443e-3 | 2.779e-2 | 93   | 98  | 121.0503   | 126.9002 | AAL94758.1  Hypothetical cytosolic protein                                          |                         |    |    |   |   |   |   |
|         |                        |                      |          |          | 88   | 111 | 88.0000    | 155.2235 |                                                                                     |                         |    |    |   |   |   |   |
| FN0563  | -1.280                 | 8.291                | 6.724e-8 | 3.251e-9 | 9    | 21  | 11.7145    | 27.1929  | AAL94759.1  putative tRNA (5-methylaminomethyl-2-thiouridylate) - methyltransferase |                         |    |    |   |   |   |   |
|         |                        |                      |          |          | 11   | 20  | 11.0000    | 27.9682  |                                                                                     |                         |    |    |   |   |   |   |
| FN0574  |                        |                      |          |          |      | 3   |            | 3.8847   | AAL94770.1  Hypothetical cytosolic protein                                          |                         |    |    |   |   |   |   |
|         |                        |                      |          |          |      |     |            |          |                                                                                     |                         |    |    |   |   |   |   |
| FN0576  | 0.165                  | 12.661               | 8.411e-2 | 4.88e-1  | 81   | 58  | 105.4309   | 75.1042  | AAL94772.1  hypothetical protein                                                    |                         |    |    |   |   |   |   |
|         |                        |                      |          |          | 65   | 55  | 65.0000    | 76.9125  |                                                                                     |                         |    |    |   |   |   |   |
| FN0577  | 1.419                  | 6.387                |          |          | 13   |     | 16.9210    |          | AAL94773.1  Hypothetical protein                                                    |                         |    |    |   |   |   |   |
|         |                        |                      |          |          | 13   | 4   | 13.0000    | 5.5936   |                                                                                     |                         |    |    |   |   |   |   |
| FN0579  | 0.552                  | 18.117               | 1.224e-2 | 5.897e-2 | 588  | 341 | 765.3505   | 441.5610 | AAL94775.1  Hypothetical cytosolic protein                                          |                         |    |    |   |   |   |   |
|         |                        |                      |          |          | 526  | 314 | 526.0000   | 439.1006 |                                                                                     |                         |    |    |   |   |   |   |
| FN0580  | -1.525                 | 8.325                | 2.408e-4 | 4.815e-4 | 7    | 21  | 9.1113     | 27.1929  | AAL94776.1  Penicillin-binding protein                                              |                         |    |    |   |   |   |   |
|         |                        |                      |          |          | 12   | 24  | 12.0000    | 33.5618  |                                                                                     |                         |    |    |   |   |   |   |
| FN0581  | -0.356                 | 8.287                |          |          | 12   | 19  | 15.6194    | 24.6031  | AAL94777.1  Lipoprotein releasing system transmembrane protein lolE                 |                         |    |    |   |   |   |   |
|         |                        |                      |          |          |      | 11  |            | 15.3825  |                                                                                     |                         |    |    |   |   |   |   |
| FN0582  | -0.387                 | 11.018               | 1.503e-2 | 7.478e-2 | 32   | 34  | 41.6517    | 44.0266  | AAL94778.1  Lipoprotein releasing system ATP-binding protein lolD                   |                         |    |    |   |   |   |   |
|         |                        |                      |          |          | 38   | 43  | 38.0000    | 60.1316  |                                                                                     |                         |    |    |   |   |   |   |
| FN0583  | 0.411                  | 6.772                |          |          | 7    | 7   | 9.1113     | 9.0643   | AAL94779.1  Hypothetical Exported Protein                                           |                         |    |    |   |   |   |   |
|         |                        |                      |          |          | 15   |     | 15.0000    |          |                                                                                     |                         |    |    |   |   |   |   |
| FN0585  | 0.034                  | 6.524                | 1.367e-1 | 8.413e-1 | 8    | 6   | 10.4129    | 7.7694   | AAL94781.1  Two-component response regulator czcR                                   |                         |    |    |   |   |   |   |
|         |                        |                      |          |          | 9    | 8   | 9.0000     | 11.1873  |                                                                                     |                         |    |    |   |   |   |   |
| FN0586  | 0.459                  | 6.286                | 5.033e-2 | 2.811e-1 | 9    | 3   | 11.7145    | 3.8847   | AAL94782.1  Two-component sensor kinase czcS                                        |                         |    |    |   |   |   |   |
|         |                        |                      |          |          | 9    | 8   | 9.0000     | 11.1873  |                                                                                     |                         |    |    |   |   |   |   |

Show detected proteins only

Show all proteins

Filter by category:

GO: amino acid transport

Proteins found: 1358

Enter (or paste) list of ORFs

Find ORFs

Test Cutoff

q-Value

p-Value

.005

| Signif | Direction | Applies To   |
|--------|-----------|--------------|
| yes    | +         | ratios, bars |
| no     | n/a       | bars         |
| yes    | -         | ratios, bars |
| yes    | +         | p-, q-Values |
| yes    | -         | p-, q-Values |

Dot Plots

Fn Summary Table

FnPg vs Fn

FnSg vs Fn

FnPgSg vs Fn

FnPgSg vs FnPg

FnSg vs FnPg

FnPgSg vs FnSg

Fn Coverage

| Protein | FnSg vs Fn             |                      |          |           | Raw  |     | Normalized |          | Description                                                                       | Log <sub>2</sub> Ratios |    |    |   |   |   |   |
|---------|------------------------|----------------------|----------|-----------|------|-----|------------|----------|-----------------------------------------------------------------------------------|-------------------------|----|----|---|---|---|---|
|         | Log <sub>2</sub> Ratio | Log <sub>2</sub> Sum | q-Value  | p-Value   | FnSg | Fn  | FnSg       | Fn       |                                                                                   | -6                      | -4 | -2 | 0 | 2 | 4 | 6 |
| FN0590  | 1.373                  | 9.254                | 1.808e-3 | 6.042e-3  | 25   | 14  | 32.5404    | 18.1286  | AAL94786.1  N-acyl-L-amino acid amidohydrolase                                    |                         |    |    |   |   |   |   |
|         |                        |                      |          |           | 47   | 9   | 47.0000    | 12.5857  |                                                                                   |                         |    |    |   |   |   |   |
| FN0592  | -0.258                 | 13.368               | 5.754e-2 | 3.244e-1  | 93   | 84  | 121.0503   | 108.7716 | AAL94788.1  ATP-dependent DNA helicase pcrA                                       |                         |    |    |   |   |   |   |
|         |                        |                      |          |           | 67   | 83  | 67.0000    | 116.0680 |                                                                                   |                         |    |    |   |   |   |   |
| FN0593  | -0.312                 | 10.969               | 3.579e-3 | 1.403e-2  | 31   | 36  | 40.3501    | 46.6164  | AAL94789.1  UDP-3-O-[3-hydroxymyristoyl] N-acetylglucosamine deacetylase          |                         |    |    |   |   |   |   |
|         |                        |                      |          |           | 40   | 38  | 40.0000    | 53.1396  |                                                                                   |                         |    |    |   |   |   |   |
| FN0594  | 3.705                  | 10.066               |          |           | 91   | 7   | 118.4471   | 9.0643   | AAL94790.1  (3R)-hydroxymyristoyl-[acyl carrier protein] dehydratase              |                         |    |    |   |   |   |   |
|         |                        |                      |          |           | 118  |     | 118.0000   |          |                                                                                   |                         |    |    |   |   |   |   |
| FN0595  | -0.840                 | 8.012                | 5.036e-5 | 6.152e-5  | 10   | 17  | 13.0162    | 22.0133  | AAL94791.1  Acyl-[acyl-carrier-protein]-UDP-N-acetylglucosamine O-acyltransferase |                         |    |    |   |   |   |   |
|         |                        |                      |          |           | 11   | 15  | 11.0000    | 20.9761  |                                                                                   |                         |    |    |   |   |   |   |
| FN0596  | -0.667                 | 9.548                | 3.358e-3 | 1.293e-2  | 18   | 23  | 23.4291    | 29.7827  | AAL94792.1  Hypothetical protein                                                  |                         |    |    |   |   |   |   |
|         |                        |                      |          |           | 20   | 28  | 20.0000    | 39.1555  |                                                                                   |                         |    |    |   |   |   |   |
| FN0597  | -0.322                 | 10.315               | 2.133e-2 | 1.099e-1  | 26   | 26  | 33.8420    | 33.6674  | AAL94793.1  Lipid-A-disaccharide synthase                                         |                         |    |    |   |   |   |   |
|         |                        |                      |          |           | 30   | 33  | 30.0000    | 46.1475  |                                                                                   |                         |    |    |   |   |   |   |
| FN0598  | -0.762                 | 9.422                | 2.596e-3 | 9.369e-3  | 14   | 30  | 18.2226    | 38.8470  | AAL94794.1  Phospholipid-lipopolysaccharide ABC transporter                       |                         |    |    |   |   |   |   |
|         |                        |                      |          |           | 22   | 21  | 22.0000    | 29.3666  |                                                                                   |                         |    |    |   |   |   |   |
| FN0600  | -0.004                 | 12.761               | 1.483e-1 | 9.256e-1  | 61   | 63  | 79.3986    | 81.5787  | AAL94796.1  Hypothetical protein                                                  |                         |    |    |   |   |   |   |
|         |                        |                      |          |           | 87   | 61  | 87.0000    | 85.3030  |                                                                                   |                         |    |    |   |   |   |   |
| FN0601  |                        |                      |          |           |      | 31  |            | 40.1419  | AAL94797.1  Hypothetical exported 24-amino acid repeat protein                    |                         |    |    |   |   |   |   |
|         |                        |                      |          |           |      | 27  |            | 37.7571  |                                                                                   |                         |    |    |   |   |   |   |
| FN0602  | -1.050                 | 13.985               | 1.203e-5 | 7.965e-6  | 63   | 148 | 82.0018    | 191.6452 | AAL94798.1  Hypothetical protein                                                  |                         |    |    |   |   |   |   |
|         |                        |                      |          |           | 95   | 125 | 95.0000    | 174.8012 |                                                                                   |                         |    |    |   |   |   |   |
| FN0603  | 1.234                  | 6.202                |          |           | 11   |     | 14.3178    |          | AAL94799.1  Transcriptional regulatory protein, LYSR family                       |                         |    |    |   |   |   |   |
|         |                        |                      |          |           | 12   | 4   | 12.0000    | 5.5936   |                                                                                   |                         |    |    |   |   |   |   |
| FN0608  | 1.631                  | 12.861               | 3.087e-8 | 6.398e-10 | 118  | 39  | 153.5908   | 50.5011  | AAL94804.1  Exoribonuclease II                                                    |                         |    |    |   |   |   |   |
|         |                        |                      |          |           | 150  | 34  | 150.0000   | 47.5459  |                                                                                   |                         |    |    |   |   |   |   |
| FN0609  |                        |                      |          |           |      |     |            |          | AAL94805.1  Small protein B                                                       |                         |    |    |   |   |   |   |
|         |                        |                      |          |           | 11   |     | 11.0000    |          |                                                                                   |                         |    |    |   |   |   |   |
| FN0610  | -0.706                 | 15.862               | 7.534e-6 | 3.747e-6  | 153  | 248 | 199.1473   | 321.1353 | AAL94806.1  unknown                                                               |                         |    |    |   |   |   |   |
|         |                        |                      |          |           | 183  | 216 | 183.0000   | 302.0565 |                                                                                   |                         |    |    |   |   |   |   |
| FN0611  | 0.328                  | 19.160               | 3.215e-3 | 1.223e-2  | 612  | 541 | 796.5893   | 700.5410 | AAL94807.1  Threonyl-tRNA synthetase                                              |                         |    |    |   |   |   |   |
|         |                        |                      |          |           | 918  | 476 | 918.0000   | 665.6430 |                                                                                   |                         |    |    |   |   |   |   |

Show detected proteins only  
 Show all proteins  
 Filter by category:

Proteins found: 1358

Enter (or paste) list of ORFs

Find ORFs

Test Cutoff

q-Value

p-Value

.005

| Signif | Direction | Applies To   |
|--------|-----------|--------------|
| yes    | +         | ratios, bars |
| no     | n/a       | bars         |
| yes    | -         | ratios, bars |
| yes    | +         | p-, q-Values |
| yes    | -         | p-, q-Values |

Dot Plots

Dot Plots



Fn Summary Table FnPg vs Fn FnSg vs Fn FnPgSg vs Fn FnPgSg vs FnPg FnSg vs FnPg FnPgSg vs FnSg Fn Coverage

| Protein | FnSg vs Fn             |                      |          |          | Raw  |     | Normalized |          | Description                                                                  | Log <sub>2</sub> Ratios |    |    |   |   |   |   |
|---------|------------------------|----------------------|----------|----------|------|-----|------------|----------|------------------------------------------------------------------------------|-------------------------|----|----|---|---|---|---|
|         | Log <sub>2</sub> Ratio | Log <sub>2</sub> Sum | q-Value  | p-Value  | FnSg | Fn  | FnSg       | Fn       |                                                                              | -6                      | -4 | -2 | 0 | 2 | 4 | 6 |
| FN0612  | -1.557                 | 13.116               | 7.648e-4 | 2.154e-3 | 36   | 107 | 46.8582    | 138.5543 | AAL94808.1  Hypothetical protein                                             |                         |    |    |   |   |   |   |
|         |                        |                      |          |          | 63   | 132 | 63.0000    | 184.5901 |                                                                              |                         |    |    |   |   |   |   |
| FN0614  |                        |                      |          |          |      |     |            |          | AAL94810.1  Export ABC transporter                                           |                         |    |    |   |   |   |   |
|         |                        |                      |          |          | 3    |     | 3.0000     |          |                                                                              |                         |    |    |   |   |   |   |
| FN0616  |                        |                      |          |          |      |     |            |          | AAL94812.1  Hypothetical protein                                             |                         |    |    |   |   |   |   |
|         |                        |                      |          |          |      | 53  |            | 68.6297  |                                                                              |                         |    |    |   |   |   |   |
| FN0617  | -1.376                 | 14.679               | 5.643e-6 | 2.319e-6 | 73   | 200 | 95.0180    | 258.9800 | AAL94813.1  DNA polymerase III, beta chain                                   |                         |    |    |   |   |   |   |
|         |                        |                      |          |          | 106  | 188 | 106.0000   | 262.9010 |                                                                              |                         |    |    |   |   |   |   |
| FN0618  | -0.791                 | 13.948               | 2.997e-3 | 1.121e-2 | 90   | 128 | 117.1455   | 165.7472 | AAL94814.1  Spermidine/putrescine-binding protein                            |                         |    |    |   |   |   |   |
|         |                        |                      |          |          | 74   | 118 | 74.0000    | 165.0123 |                                                                              |                         |    |    |   |   |   |   |
| FN0619  | -1.120                 | 8.589                | 4.304e-4 | 1.011e-3 | 12   | 22  | 15.6194    | 28.4878  | AAL94815.1  Small-conductance mechanosensitive channel                       |                         |    |    |   |   |   |   |
|         |                        |                      |          |          | 11   | 21  | 11.0000    | 29.3666  |                                                                              |                         |    |    |   |   |   |   |
| FN0621  | -0.505                 | 11.363               | 2.115e-3 | 7.286e-3 | 37   | 48  | 48.1598    | 62.1552  | AAL94817.1  4-hydroxybutyrate coenzyme A transferase                         |                         |    |    |   |   |   |   |
|         |                        |                      |          |          | 38   | 43  | 38.0000    | 60.1316  |                                                                              |                         |    |    |   |   |   |   |
| FN0622  | 3.782                  | 9.284                | 1.265e-3 | 3.955e-3 | 57   | 5   | 74.1921    | 6.4745   | AAL94818.1  8-oxoguanine DNA glycosylase                                     |                         |    |    |   |   |   |   |
|         |                        |                      |          |          | 111  | 5   | 111.0000   | 6.9920   |                                                                              |                         |    |    |   |   |   |   |
| FN0625  | -0.989                 | 8.803                |          |          |      | 19  |            | 24.6031  | AAL94821.1  Aspartate aminotransferase                                       |                         |    |    |   |   |   |   |
|         |                        |                      |          |          | 15   | 25  | 15.0000    | 34.9602  |                                                                              |                         |    |    |   |   |   |   |
| FN0626  |                        |                      |          |          |      |     |            |          | AAL94822.1  Hypothetical cytosolic protein                                   |                         |    |    |   |   |   |   |
|         |                        |                      |          |          | 12   |     | 12.0000    |          |                                                                              |                         |    |    |   |   |   |   |
| FN0627  | -0.867                 | 14.665               | 2.127e-4 | 4.124e-4 | 95   | 158 | 123.6536   | 204.5942 | AAL94823.1  Glucosamine--fructose-6-phosphate aminotransferase (isomerizing) |                         |    |    |   |   |   |   |
|         |                        |                      |          |          | 115  | 165 | 115.0000   | 230.7376 |                                                                              |                         |    |    |   |   |   |   |
| FN0628  | -0.018                 | 5.529                | 1.536e-1 | 9.644e-1 | 5    | 3   | 6.5081     | 3.8847   | AAL94824.1  Glucosamine--fructose-6-phosphate aminotransferase (isomerizing) |                         |    |    |   |   |   |   |
|         |                        |                      |          |          | 7    | 7   | 7.0000     | 9.7889   |                                                                              |                         |    |    |   |   |   |   |
| FN0629  | 0.344                  | 9.031                | 4.925e-2 | 2.745e-1 | 25   | 13  | 32.5404    | 16.8337  | AAL94825.1  PTS system, IID component                                        |                         |    |    |   |   |   |   |
|         |                        |                      |          |          | 19   | 17  | 19.0000    | 23.7730  |                                                                              |                         |    |    |   |   |   |   |
| FN0630  |                        |                      |          |          |      |     |            |          | AAL94826.1  PTS system, IIC component                                        |                         |    |    |   |   |   |   |
|         |                        |                      |          |          |      | 11  |            | 15.3825  |                                                                              |                         |    |    |   |   |   |   |
| FN0631  | -0.404                 | 8.623                | 5.102e-3 | 2.117e-2 | 15   | 18  | 19.5242    | 23.3082  | AAL94827.1  PTS system, IIB component                                        |                         |    |    |   |   |   |   |
|         |                        |                      |          |          | 15   | 16  | 15.0000    | 22.3746  |                                                                              |                         |    |    |   |   |   |   |
| FN0633  | 0.057                  | 6.916                | 7.709e-2 | 4.439e-1 | 8    | 8   | 10.4129    | 10.3592  | AAL94829.1  Replication protein                                              |                         |    |    |   |   |   |   |
|         |                        |                      |          |          | 12   | 8   | 12.0000    | 11.1873  |                                                                              |                         |    |    |   |   |   |   |

Show detected proteins only  
 Show all proteins  
 Filter by category:

Proteins found: 1358

Test Cutoff

| Signif | Direction | Applies To   |
|--------|-----------|--------------|
| yes    | +         | ratios, bars |
| no     | n/a       | bars         |
| yes    | -         | ratios, bars |
| yes    | +         | p-, q-Values |
| yes    | -         |              |

Fn Summary Table FnPg vs Fn FnSg vs Fn FnPgSg vs Fn FnPgSg vs FnPg FnSg vs FnPg FnPgSg vs FnSg Fn Coverage

| Protein | FnSg vs Fn             |                      |          |          | Raw  |      | Normalized |           | Description                                                    | Log <sub>2</sub> Ratios |    |    |   |   |   |   |
|---------|------------------------|----------------------|----------|----------|------|------|------------|-----------|----------------------------------------------------------------|-------------------------|----|----|---|---|---|---|
|         | Log <sub>2</sub> Ratio | Log <sub>2</sub> Sum | q-Value  | p-Value  | FnSg | Fn   | FnSg       | Fn        |                                                                | -6                      | -4 | -2 | 0 | 2 | 4 | 6 |
| FN0634  | -2.139                 | 12.536               | 1.339e-4 | 2.301e-4 | 28   | 117  | 36.4453    | 151.5033  | AAL94830.1  GTP-binding protein TypA/BipA                      |                         |    |    |   |   |   |   |
|         |                        |                      |          |          | 37   | 123  | 37.0000    | 172.0044  |                                                                |                         |    |    |   |   |   |   |
| FN0636  |                        |                      |          |          |      | 6    |            | 7.7694    | AAL94832.1  Hypothetical protein                               |                         |    |    |   |   |   |   |
|         |                        |                      |          |          |      |      |            |           |                                                                |                         |    |    |   |   |   |   |
| FN0637  |                        |                      |          |          |      | 6    |            | 7.7694    | AAL94833.1  Hypothetical exported 24-amino acid repeat protein |                         |    |    |   |   |   |   |
|         |                        |                      |          |          |      |      |            |           |                                                                |                         |    |    |   |   |   |   |
| FN0643  | 0.129                  | 8.587                | 1.19e-1  | 7.175e-1 | 10   | 16   | 13.0162    | 20.7184   | AAL94839.1  hypothetical DNA-binding protein                   |                         |    |    |   |   |   |   |
|         |                        |                      |          |          | 28   | 12   | 28.0000    | 16.7809   |                                                                |                         |    |    |   |   |   |   |
| FN0644  | -0.635                 | 10.907               | 3.776e-3 | 1.502e-2 | 21   | 39   | 27.3339    | 50.5011   | AAL94840.1  Uroporphyrin-III C-methyltransferase               |                         |    |    |   |   |   |   |
|         |                        |                      |          |          | 43   | 42   | 43.0000    | 58.7332   |                                                                |                         |    |    |   |   |   |   |
| FN0645  | -0.851                 | 6.021                |          |          |      | 7    |            | 9.0643    | AAL94841.1  Porphobilinogen deaminase                          |                         |    |    |   |   |   |   |
|         |                        |                      |          |          | 6    | 9    | 6.0000     | 12.5857   |                                                                |                         |    |    |   |   |   |   |
| FN0646  |                        |                      |          |          |      |      |            |           | AAL94842.1  Glutamyl-tRNA reductase                            |                         |    |    |   |   |   |   |
|         |                        |                      |          |          | 3    |      | 3.0000     |           |                                                                |                         |    |    |   |   |   |   |
| FN0651  |                        |                      |          |          |      |      |            |           | AAL94847.1  Ribosomal large subunit pseudouridine synthase D   |                         |    |    |   |   |   |   |
|         |                        |                      |          |          | 6    |      | 6.0000     |           |                                                                |                         |    |    |   |   |   |   |
| FN0652  | 1.685                  | 24.463               | 5.153e-4 | 1.277e-3 | 5960 | 2050 | 7757.6347  | 2654.5455 | AAL94848.1  Glyceraldehyde 3-phosphate dehydrogenase           |                         |    |    |   |   |   |   |
|         |                        |                      |          |          | 9493 | 1937 | 9493.0000  | 2708.7196 |                                                                |                         |    |    |   |   |   |   |
| FN0653  | 0.939                  | 12.582               | 4.025e-3 | 1.62e-2  | 69   | 42   | 89.8115    | 54.3858   | AAL94849.1  unknown                                            |                         |    |    |   |   |   |   |
|         |                        |                      |          |          | 127  | 42   | 127.0000   | 58.7332   |                                                                |                         |    |    |   |   |   |   |
| FN0654  | 0.924                  | 19.929               | 7.066e-4 | 1.93e-3  | 1156 | 532  | 1504.6687  | 688.8869  | AAL94850.1  Phosphoglycerate kinase                            |                         |    |    |   |   |   |   |
|         |                        |                      |          |          | 1248 | 545  | 1248.0000  | 762.1333  |                                                                |                         |    |    |   |   |   |   |
| FN0655  | -2.362                 | 10.514               | 8.012e-4 | 2.282e-3 | 19   | 54   | 24.7307    | 69.9246   | AAL94851.1  unknown                                            |                         |    |    |   |   |   |   |
|         |                        |                      |          |          | 9    | 74   | 9.0000     | 103.4823  |                                                                |                         |    |    |   |   |   |   |
| FN0656  |                        |                      |          |          |      | 64   |            | 82.8736   | AAL94852.1  Hypothetical protein                               |                         |    |    |   |   |   |   |
|         |                        |                      |          |          |      |      |            |           |                                                                |                         |    |    |   |   |   |   |
| FN0657  | 2.260                  | 9.346                |          |          | 42   | 9    | 54.6679    | 11.6541   | AAL94853.1  Acetyltransferase                                  |                         |    |    |   |   |   |   |
|         |                        |                      |          |          | 57   |      | 57.0000    |           |                                                                |                         |    |    |   |   |   |   |
| FN0658  | -1.617                 | 13.256               | 5.919e-5 | 7.705e-5 | 43   | 139  | 55.9695    | 179.9911  | AAL94854.1  ABC transporter substrate-binding protein          |                         |    |    |   |   |   |   |
|         |                        |                      |          |          | 57   | 119  | 57.0000    | 166.4108  |                                                                |                         |    |    |   |   |   |   |
| FN0660  | -0.733                 | 6.770                | 1.002e-2 | 4.685e-2 | 4    | 10   | 5.2065     | 12.9490   | AAL94856.1  ABC transporter ATP-binding protein                |                         |    |    |   |   |   |   |
|         |                        |                      |          |          | 11   | 10   | 11.0000    | 13.9841   |                                                                |                         |    |    |   |   |   |   |

Show detected proteins only  
 Show all proteins  
 Filter by category:

Proteins found: 1358

Enter (or paste) list of ORFs

Find ORFs

Test Cutoff

q-Value p-Value

.005

| Signif | Direction | Applies To   |
|--------|-----------|--------------|
| yes    | +         | ratios, bars |
| no     | n/a       | bars         |
| yes    | -         | ratios, bars |
| yes    | +         | p-, q-Values |
| yes    | -         | p-, q-Values |

Dot Plots Dot Plots

Fn Summary Table

FnPg vs Fn

FnSg vs Fn

FnPgSg vs Fn

FnPgSg vs FnPg

FnSg vs FnPg

FnPgSg vs FnSg

Fn Coverage

| Protein | FnSg vs Fn             |                      |          |          | Raw  |     | Normalized |           | Description                                                         | Log <sub>2</sub> Ratios |         |    |   |   |   |   |
|---------|------------------------|----------------------|----------|----------|------|-----|------------|-----------|---------------------------------------------------------------------|-------------------------|---------|----|---|---|---|---|
|         | Log <sub>2</sub> Ratio | Log <sub>2</sub> Sum | q-Value  | p-Value  | FnSg | Fn  | FnSg       | Fn        |                                                                     | -6                      | -4      | -2 | 0 | 2 | 4 | 6 |
| FN0662  | 0.581                  | 11.423               | 6.587e-4 | 1.756e-3 | 47   | 37  | 61.1760    | 47.9113   | AAL94858.1  Formiminoglutamase                                      |                         |         |    |   |   |   |   |
|         |                        |                      |          |          | 67   | 27  | 67.0000    | 37.7571   |                                                                     |                         |         |    |   |   |   |   |
| FN0664  | -0.313                 | 14.662               | 9.048e-2 | 5.286e-1 | 46   | 126 | 59.8744    | 163.1574  | AAL94860.1  2-nitropropane dioxygenase                              |                         |         |    |   |   |   |   |
|         |                        |                      |          |          | 229  | 140 | 229.0000   | 195.7774  |                                                                     |                         |         |    |   |   |   |   |
| FN0666  | -1.071                 | 6.290                | 1.61e-4  | 2.956e-4 | 4    | 9   | 5.2065     | 11.6541   | AAL94862.1  Hypothetical protein                                    |                         |         |    |   |   |   |   |
|         |                        |                      |          |          | 7    | 10  | 7.0000     | 13.9841   |                                                                     |                         |         |    |   |   |   |   |
| FN0668  | -0.869                 | 9.550                | 1.004e-6 | 1.511e-7 | 15   | 28  | 19.5242    | 36.2572   | AAL94864.1  High-affinity zinc uptake system protein znuA precursor |                         |         |    |   |   |   |   |
|         |                        |                      |          |          | 21   | 27  | 21.0000    | 37.7571   |                                                                     |                         |         |    |   |   |   |   |
| FN0672  |                        |                      |          |          | 17   |     | 22.1275    |           | AAL94868.1  ATPase                                                  |                         |         |    |   |   |   |   |
|         |                        |                      |          |          | 11   |     | 11.0000    |           |                                                                     |                         |         |    |   |   |   |   |
| FN0675  | 1.552                  | 22.124               | 6.365e-3 | 2.739e-2 | 2016 | 936 | 2624.0590  | 1212.0266 | AAL94871.1  60 kDa chaperonin GROEL                                 |                         |         |    |   |   |   |   |
|         |                        |                      |          |          | 4698 | 919 | 4698.0000  | 1285.1385 |                                                                     |                         |         |    |   |   |   |   |
| FN0676  | -2.415                 | 13.229               | 3.02e-4  | 6.479e-4 | 36   | 193 | 46.8582    | 249.9157  | AAL94872.1  10 kDa chaperonin GROES                                 |                         |         |    |   |   |   |   |
|         |                        |                      |          |          | 38   | 145 | 38.0000    | 202.7694  |                                                                     |                         |         |    |   |   |   |   |
| FN0677  | -0.420                 | 12.645               | 9.004e-4 | 2.623e-3 | 51   | 76  | 66.3824    | 98.4124   | AAL94873.1  Hypothetical protein                                    |                         |         |    |   |   |   |   |
|         |                        |                      |          |          | 72   | 62  | 72.0000    | 86.7014   |                                                                     |                         |         |    |   |   |   |   |
| FN0678  | -0.741                 | 12.419               | 6.85e-5  | 9.561e-5 | 48   | 70  | 62.4776    | 90.6430   | AAL94874.1  Ser/Thr protein kinase                                  |                         |         |    |   |   |   |   |
|         |                        |                      |          |          | 52   | 72  | 52.0000    | 100.6855  |                                                                     |                         |         |    |   |   |   |   |
| FN0679  | -1.004                 | 7.344                |          |          |      | 16  |            | 20.7184   | AAL94875.1  GTPase                                                  |                         |         |    |   |   |   |   |
|         |                        |                      |          |          |      |     | 9          | 11        |                                                                     | 9.0000                  | 15.3825 |    |   |   |   |   |
| FN0680  |                        |                      |          |          |      |     |            |           | AAL94876.1  Ribulose-phosphate 3-epimerase                          |                         |         |    |   |   |   |   |
|         |                        |                      |          |          | 13   |     | 13.0000    |           |                                                                     |                         |         |    |   |   |   |   |
| FN0681  | -0.045                 | 16.507               | 1.015e-1 | 6.006e-1 | 212  | 227 | 275.9427   | 293.9424  | AAL94877.1  Transcriptional regulator, MarR family                  |                         |         |    |   |   |   |   |
|         |                        |                      |          |          | 325  | 233 | 325.0000   | 325.8295  |                                                                     |                         |         |    |   |   |   |   |
| FN0682  | 0.352                  | 9.756                | 1.795e-2 | 9.098e-2 | 28   | 24  | 36.4453    | 31.0776   | AAL94878.1  Fibronectin-binding protein-like protein A              |                         |         |    |   |   |   |   |
|         |                        |                      |          |          | 30   | 15  | 30.0000    | 20.9761   |                                                                     |                         |         |    |   |   |   |   |
| FN0684  |                        |                      |          |          | 16   |     | 20.8259    |           | AAL94880.1  Prismane protein                                        |                         |         |    |   |   |   |   |
|         |                        |                      |          |          | 8    |     | 8.0000     |           |                                                                     |                         |         |    |   |   |   |   |
| FN0685  | 1.229                  | 11.493               | 8.405e-3 | 3.802e-2 | 81   | 25  | 105.4309   | 32.3725   | AAL94881.1  Sodium/pantothenate symporter                           |                         |         |    |   |   |   |   |
|         |                        |                      |          |          | 59   | 27  | 59.0000    | 37.7571   |                                                                     |                         |         |    |   |   |   |   |
| FN0688  | 0.481                  | 11.908               | 1.35e-4  | 2.328e-4 | 58   | 40  | 75.4938    | 51.7960   | AAL94884.1  Hypothetical protein                                    |                         |         |    |   |   |   |   |
|         |                        |                      |          |          | 71   | 38  | 71.0000    | 53.1396   |                                                                     |                         |         |    |   |   |   |   |

- Show detected proteins only  
 Show all proteins

Filter by category:  
 GO: amino acid transport

Proteins found:  
1358

Enter (or  
paste) list  
of ORFs

Find ORFs

Test

q-Value

p-Value

Cutoff

.005

| Signif | Direction | Applies To   |
|--------|-----------|--------------|
| yes    | +         | ratios, bars |
| no     | n/a       | bars         |
| yes    | -         | ratios, bars |
| yes    | +         | p-, q-Values |
| yes    | -         | p-, q-Values |

Dot Plots Dot Plots

Fn Summary Table FnPg vs Fn FnSg vs Fn FnPgSg vs Fn FnPgSg vs FnPg FnSg vs FnPg FnPgSg vs FnSg Fn Coverage

| Protein | FnSg vs Fn             |                      |          |          | Raw  |     | Normalized |          | Description                                      | Log <sub>2</sub> Ratios |    |    |   |   |
|---------|------------------------|----------------------|----------|----------|------|-----|------------|----------|--------------------------------------------------|-------------------------|----|----|---|---|
|         | Log <sub>2</sub> Ratio | Log <sub>2</sub> Sum | q-Value  | p-Value  | FnSg | Fn  | FnSg       | Fn       |                                                  | -6                      | -4 | -2 | 0 | 2 |
| FN0689  | -0.705                 | 15.913               | 7.982e-3 | 3.579e-2 | 196  | 234 | 255.1168   | 303.0067 | AAL94885.1  Hypothetical protein                 |                         |    |    |   |   |
|         |                        |                      |          |          | 134  | 237 | 134.0000   | 331.4231 |                                                  |                         |    |    |   |   |
| FN0692  | -1.624                 | 7.070                | 3.245e-3 | 1.238e-2 | 4    | 12  | 5.2065     | 15.5388  | AAL94888.1  Nitrogen regulation protein NIFR3    |                         |    |    |   |   |
|         |                        |                      |          |          | 8    | 18  | 8.0000     | 25.1714  |                                                  |                         |    |    |   |   |
| FN0693  |                        |                      |          |          |      | 21  |            | 27.1929  | AAL94889.1  DNA mismatch repair protein mutS     |                         |    |    |   |   |
|         |                        |                      |          |          |      | 32  |            | 44.7491  |                                                  |                         |    |    |   |   |
| FN0694  | -0.540                 | 12.624               | 2.427e-3 | 8.634e-3 | 49   | 67  | 63.7792    | 86.7583  | AAL94890.1  S-layer protein                      |                         |    |    |   |   |
|         |                        |                      |          |          | 68   | 75  | 68.0000    | 104.8807 |                                                  |                         |    |    |   |   |
| FN0695  | 0.494                  | 10.669               | 8.939e-3 | 4.09e-2  | 39   | 32  | 50.7630    | 41.4368  | AAL94891.1  ABC transporter ATP-binding protein  |                         |    |    |   |   |
|         |                        |                      |          |          | 45   | 19  | 45.0000    | 26.5698  |                                                  |                         |    |    |   |   |
| FN0697  | -0.654                 | 15.441               | 2.525e-4 | 5.114e-4 | 117  | 210 | 152.2891   | 271.9291 | AAL94893.1  Alanyl-tRNA synthetase               |                         |    |    |   |   |
|         |                        |                      |          |          | 184  | 184 | 184.0000   | 257.3074 |                                                  |                         |    |    |   |   |
| FN0699  | -2.538                 | 11.782               | 4.124e-5 | 4.597e-5 | 24   | 101 | 31.2388    | 130.7849 | AAL94895.1  Protein translocase subunit secD     |                         |    |    |   |   |
|         |                        |                      |          |          | 18   | 111 | 18.0000    | 155.2235 |                                                  |                         |    |    |   |   |
| FN0700  | -3.208                 | 9.117                | 4.85e-4  | 1.179e-3 | 5    | 48  | 6.5081     | 62.1552  | AAL94896.1  Protein translocase subunit secF     |                         |    |    |   |   |
|         |                        |                      |          |          | 9    | 58  | 9.0000     | 81.1078  |                                                  |                         |    |    |   |   |
| FN0701  | -0.888                 | 14.791               | 1.253e-5 | 8.483e-6 | 88   | 182 | 114.5423   | 235.6718 | AAL94897.1  Methyltransferase                    |                         |    |    |   |   |
|         |                        |                      |          |          | 133  | 159 | 133.0000   | 222.3471 |                                                  |                         |    |    |   |   |
| FN0705  | -0.554                 | 13.935               | 1.123e-4 | 1.815e-4 | 75   | 123 | 97.6212    | 159.2727 | AAL94901.1  DNA polymerase I                     |                         |    |    |   |   |
|         |                        |                      |          |          | 109  | 103 | 109.0000   | 144.0362 |                                                  |                         |    |    |   |   |
| FN0706  | -1.443                 | 5.443                |          |          |      | 6   |            | 7.7694   | AAL94902.1  Hypothetical cytosolic protein       |                         |    |    |   |   |
|         |                        |                      |          |          | 4    | 10  | 4.0000     | 13.9841  |                                                  |                         |    |    |   |   |
| FN0707  | -1.677                 | 7.767                | 9.49e-4  | 2.796e-3 | 5    | 17  | 6.5081     | 22.0133  | AAL94903.1  Riboflavin kinase                    |                         |    |    |   |   |
|         |                        |                      |          |          | 10   | 22  | 10.0000    | 30.7650  |                                                  |                         |    |    |   |   |
| FN0710  | -0.551                 | 11.934               | 2.344e-3 | 8.271e-3 | 41   | 64  | 53.3663    | 82.8736  | AAL94906.1  Hypothetical protein                 |                         |    |    |   |   |
|         |                        |                      |          |          | 50   | 49  | 50.0000    | 68.5221  |                                                  |                         |    |    |   |   |
| FN0711  | 1.073                  | 8.284                | 1.013e-2 | 4.741e-2 | 14   | 8   | 18.2226    | 10.3592  | AAL94907.1  Phosphopantothenate--cysteine ligase |                         |    |    |   |   |
|         |                        |                      |          |          | 33   | 10  | 33.0000    | 13.9841  |                                                  |                         |    |    |   |   |
| FN0714  |                        |                      |          |          | 8    |     | 10.4129    |          | AAL94910.1  NADH oxidase                         |                         |    |    |   |   |
|         |                        |                      |          |          | 16   |     | 16.0000    |          |                                                  |                         |    |    |   |   |
| FN0715  | 0.029                  | 14.392               | 9.823e-2 | 5.789e-1 | 120  | 113 | 156.1940   | 146.3237 | AAL94911.1  Hypothetical protein                 |                         |    |    |   |   |
|         |                        |                      |          |          | 140  | 103 | 140.0000   | 144.0362 |                                                  |                         |    |    |   |   |

Show detected proteins only  
 Show all proteins  
 Filter by category:  
 GO: amino acid transport

Proteins found:  
 1358

Enter (or paste) list of ORFs

Test Cutoff

| Signif | Direction | Applies To   |
|--------|-----------|--------------|
| yes    | +         | ratios, bars |
| no     | n/a       | bars         |
| yes    | -         | ratios, bars |
| yes    | +         | p-, q-Values |
| yes    | -         | p-, q-Values |

Fn Summary Table FnPg vs Fn FnSg vs Fn FnPgSg vs Fn FnPgSg vs FnPg FnSg vs FnPg FnPgSg vs FnSg Fn Coverage

| Protein | FnSg vs Fn             |                      |          |          | Raw  |     | Normalized |          | Description                                                  | Log <sub>2</sub> Ratios |    |    |   |   |   |   |
|---------|------------------------|----------------------|----------|----------|------|-----|------------|----------|--------------------------------------------------------------|-------------------------|----|----|---|---|---|---|
|         | Log <sub>2</sub> Ratio | Log <sub>2</sub> Sum | q-Value  | p-Value  | FnSg | Fn  | FnSg       | Fn       |                                                              | -6                      | -4 | -2 | 0 | 2 | 4 | 6 |
| FN0716  | -0.235                 | 12.221               | 2.347e-2 | 1.221e-1 | 51   | 65  | 66.3824    | 84.1685  | AAL94912.1  hypothetical protein                             |                         |    |    |   |   |   |   |
|         |                        |                      |          |          | 61   | 47  | 61.0000    | 65.7253  |                                                              |                         |    |    |   |   |   |   |
| FN0717  | -0.747                 | 5.391                |          |          |      |     |            |          | AAL94913.1  Ribosomal small subunit pseudouridine synthase A |                         |    |    |   |   |   |   |
|         |                        |                      |          |          | 5    | 6   | 5.0000     | 8.3905   |                                                              |                         |    |    |   |   |   |   |
| FN0719  |                        |                      |          |          |      |     |            |          | AAL94915.1  Hypothetical cytosolic protein                   |                         |    |    |   |   |   |   |
|         |                        |                      |          |          |      | 9   |            | 11.6541  |                                                              |                         |    |    |   |   |   |   |
| FN0720  | -1.166                 | 13.952               | 2.368e-3 | 8.377e-3 | 40   | 139 | 52.0647    | 179.9911 | AAL94916.1  Protein Translation Elongation Factor P (EF-P)   |                         |    |    |   |   |   |   |
|         |                        |                      |          |          | 116  | 141 | 116.0000   | 197.1758 |                                                              |                         |    |    |   |   |   |   |
| FN0721  | -1.317                 | 11.714               | 9.684e-7 | 1.428e-7 | 28   | 70  | 36.4453    | 90.6430  | AAL94917.1  Hypothetical protein                             |                         |    |    |   |   |   |   |
|         |                        |                      |          |          | 37   | 66  | 37.0000    | 92.2950  |                                                              |                         |    |    |   |   |   |   |
| FN0722  | -0.475                 | 7.658                | 1.291e-2 | 6.278e-2 | 7    | 14  | 9.1113     | 18.1286  | AAL94918.1  WD-repeat family protein                         |                         |    |    |   |   |   |   |
|         |                        |                      |          |          | 15   | 11  | 15.0000    | 15.3825  |                                                              |                         |    |    |   |   |   |   |
| FN0723  |                        |                      |          |          |      |     |            |          | AAL94919.1  Hypothetical protein                             |                         |    |    |   |   |   |   |
|         |                        |                      |          |          | 5    |     | 5.0000     |          |                                                              |                         |    |    |   |   |   |   |
| FN0724  | 0.725                  | 11.343               | 9.616e-3 | 4.466e-2 | 40   | 31  | 52.0647    | 40.1419  | AAL94920.1  Flavodoxin                                       |                         |    |    |   |   |   |   |
|         |                        |                      |          |          | 79   | 28  | 79.0000    | 39.1555  |                                                              |                         |    |    |   |   |   |   |
| FN0725  | 1.581                  | 8.595                | 3.629e-3 | 1.428e-2 | 20   | 10  | 26.0323    | 12.9490  | AAL94921.1  Molybdopterin biosynthesis MoeB protein          |                         |    |    |   |   |   |   |
|         |                        |                      |          |          | 42   | 7   | 42.0000    | 9.7889   |                                                              |                         |    |    |   |   |   |   |
| FN0728  | 0.434                  | 10.640               | 5.332e-4 | 1.337e-3 | 36   | 25  | 46.8582    | 32.3725  | AAL94924.1  Hypothetical protein                             |                         |    |    |   |   |   |   |
|         |                        |                      |          |          | 46   | 26  | 46.0000    | 36.3587  |                                                              |                         |    |    |   |   |   |   |
| FN0729  | -1.268                 | 14.581               | 6.792e-5 | 9.439e-5 | 92   | 197 | 119.7487   | 255.0953 | AAL94925.1  Phosphoglycerate mutase                          |                         |    |    |   |   |   |   |
|         |                        |                      |          |          | 82   | 165 | 82.0000    | 230.7376 |                                                              |                         |    |    |   |   |   |   |
| FN0731  | -0.446                 | 8.740                | 2.745e-2 | 1.451e-1 | 18   | 20  | 23.4291    | 25.8980  | AAL94927.1  Hypothetical protein                             |                         |    |    |   |   |   |   |
|         |                        |                      |          |          | 12   | 16  | 12.0000    | 22.3746  |                                                              |                         |    |    |   |   |   |   |
| FN0733  | -1.280                 | 12.632               | 1.505e-5 | 1.085e-5 | 34   | 100 | 44.2550    | 129.4900 | AAL94929.1  Peptidase T                                      |                         |    |    |   |   |   |   |
|         |                        |                      |          |          | 58   | 85  | 58.0000    | 118.8648 |                                                              |                         |    |    |   |   |   |   |
| FN0734  | -1.617                 | 5.582                | 5.426e-5 | 6.813e-5 | 3    | 9   | 3.9048     | 11.6541  | AAL94930.1  Fe-S oxidoreductase                              |                         |    |    |   |   |   |   |
|         |                        |                      |          |          | 4    | 9   | 4.0000     | 12.5857  |                                                              |                         |    |    |   |   |   |   |
| FN0735  | -1.818                 | 12.063               | 7.361e-6 | 3.616e-6 | 32   | 99  | 41.6517    | 128.1951 | AAL94931.1  Cell surface protein                             |                         |    |    |   |   |   |   |
|         |                        |                      |          |          | 28   | 84  | 28.0000    | 117.4664 |                                                              |                         |    |    |   |   |   |   |
| FN0736  |                        |                      |          |          | 16   |     | 20.8259    |          | AAL94932.1  Methyltransferase                                |                         |    |    |   |   |   |   |
|         |                        |                      |          |          | 17   |     | 17.0000    |          |                                                              |                         |    |    |   |   |   |   |

Show detected proteins only  
 Show all proteins  
 Filter by category:

Proteins found: 1358

Test Cutoff

| Signif | Direction | Applies To   |
|--------|-----------|--------------|
| yes    | +         | ratios, bars |
| no     | n/a       | bars         |
| yes    | -         | ratios, bars |
| yes    | +         | p-, q-Values |
| yes    | -         |              |

Fn Summary Table FnPg vs Fn FnSg vs Fn FnPgSg vs Fn FnPgSg vs FnPg FnSg vs FnPg FnPgSg vs FnSg Fn Coverage

| Protein | FnSg vs Fn             |                      |          |          | Raw  |     | Normalized |          | Description                                                    | Log <sub>2</sub> Ratios |    |    |   |   |   |   |
|---------|------------------------|----------------------|----------|----------|------|-----|------------|----------|----------------------------------------------------------------|-------------------------|----|----|---|---|---|---|
|         | Log <sub>2</sub> Ratio | Log <sub>2</sub> Sum | q-Value  | p-Value  | FnSg | Fn  | FnSg       | Fn       |                                                                | -6                      | -4 | -2 | 0 | 2 | 4 | 6 |
| FN0738  | -0.943                 | 11.505               | 2.79e-3  | 1.024e-2 | 39   | 55  | 50.7630    | 71.2195  | AAL94934.1  Hypothetical exported 24-amino acid repeat protein |                         |    |    |   |   |   |   |
|         |                        |                      |          |          | 27   | 56  | 27.0000    | 78.3109  |                                                                |                         |    |    |   |   |   |   |
| FN0739  | -0.733                 | 15.416               | 5.84e-4  | 1.501e-3 | 144  | 196 | 187.4328   | 253.8004 | AAL94935.1  Formiminotetrahydrofolate cyclodeaminase           |                         |    |    |   |   |   |   |
|         |                        |                      |          |          | 137  | 204 | 137.0000   | 285.2756 |                                                                |                         |    |    |   |   |   |   |
| FN0740  | 0.434                  | 18.450               | 1.528e-2 | 7.616e-2 | 625  | 401 | 813.5104   | 519.2550 | AAL94936.1  Imidazolonepropionase                              |                         |    |    |   |   |   |   |
|         |                        |                      |          |          | 578  | 365 | 578.0000   | 510.4195 |                                                                |                         |    |    |   |   |   |   |
| FN0741  | -0.038                 | 18.686               | 1.211e-1 | 7.32e-1  | 551  | 525 | 717.1907   | 679.8226 | AAL94937.1  Glutamate formiminotransferase                     |                         |    |    |   |   |   |   |
|         |                        |                      |          |          | 565  | 455 | 565.0000   | 636.2764 |                                                                |                         |    |    |   |   |   |   |
| FN0742  | -0.576                 | 12.074               | 7.048e-3 | 3.095e-2 | 35   | 72  | 45.5566    | 93.2328  | AAL94938.1  unknown                                            |                         |    |    |   |   |   |   |
|         |                        |                      |          |          | 62   | 48  | 62.0000    | 67.1237  |                                                                |                         |    |    |   |   |   |   |
| FN0743  | -1.291                 | 5.907                | 1.824e-4 | 3.424e-4 | 3    | 9   | 3.9048     | 11.6541  | AAL94939.1  ATP-dependent helicase, DinG family                |                         |    |    |   |   |   |   |
|         |                        |                      |          |          | 6    | 9   | 6.0000     | 12.5857  |                                                                |                         |    |    |   |   |   |   |
| FN0745  | -0.104                 | 15.243               | 1.099e-1 | 6.559e-1 | 179  | 135 | 232.9894   | 174.8115 | AAL94941.1  metal dependent phosphohydrolase                   |                         |    |    |   |   |   |   |
|         |                        |                      |          |          | 147  | 167 | 147.0000   | 233.5344 |                                                                |                         |    |    |   |   |   |   |
| FN0746  | 0.239                  | 7.325                |          |          | 5    | 9   | 6.5081     | 11.6541  | AAL94942.1  Hypothetical Metal-Binding Protein                 |                         |    |    |   |   |   |   |
|         |                        |                      |          |          | 21   |     | 21.0000    |          |                                                                |                         |    |    |   |   |   |   |
| FN0749  |                        |                      |          |          |      | 10  |            | 12.9490  | AAL94945.1  Hypothetical protein                               |                         |    |    |   |   |   |   |
|         |                        |                      |          |          |      | 6   |            | 8.3905   |                                                                |                         |    |    |   |   |   |   |
| FN0750  | 0.682                  | 11.143               | 3.125e-5 | 3.036e-5 | 48   | 31  | 62.4776    | 40.1419  | AAL94946.1  Hypothetical protein                               |                         |    |    |   |   |   |   |
|         |                        |                      |          |          | 58   | 25  | 58.0000    | 34.9602  |                                                                |                         |    |    |   |   |   |   |
| FN0751  | 0.312                  | 9.598                | 2.544e-2 | 1.334e-1 | 20   | 17  | 26.0323    | 22.0133  | AAL94947.1  L-asparaginase I                                   |                         |    |    |   |   |   |   |
|         |                        |                      |          |          | 36   | 20  | 36.0000    | 27.9682  |                                                                |                         |    |    |   |   |   |   |
| FN0752  | 0.104                  | 8.868                | 3.433e-2 | 1.859e-1 | 16   | 16  | 20.8259    | 20.7184  | AAL94948.1  Proline iminopeptidase                             |                         |    |    |   |   |   |   |
|         |                        |                      |          |          | 24   | 15  | 24.0000    | 20.9761  |                                                                |                         |    |    |   |   |   |   |
| FN0753  | -0.116                 | 12.044               | 8.057e-2 | 4.656e-1 | 46   | 44  | 59.8744    | 56.9756  | AAL94949.1  Glutamyl-tRNA(Gln) amidotransferase subunit B      |                         |    |    |   |   |   |   |
|         |                        |                      |          |          | 65   | 56  | 65.0000    | 78.3109  |                                                                |                         |    |    |   |   |   |   |
| FN0754  | -0.420                 | 13.694               | 9.565e-3 | 4.437e-2 | 63   | 102 | 82.0018    | 132.0798 | AAL94950.1  Glutamyl-tRNA(Gln) amidotransferase subunit A      |                         |    |    |   |   |   |   |
|         |                        |                      |          |          | 117  | 96  | 117.0000   | 134.2473 |                                                                |                         |    |    |   |   |   |   |
| FN0755  | -1.054                 | 11.105               | 7.568e-4 | 2.122e-3 | 27   | 58  | 35.1436    | 75.1042  | AAL94951.1  Glutamyl-tRNA(Gln) amidotransferase subunit C      |                         |    |    |   |   |   |   |
|         |                        |                      |          |          | 30   | 43  | 30.0000    | 60.1316  |                                                                |                         |    |    |   |   |   |   |
| FN0758  | -0.123                 | 15.712               | 8.126e-2 | 4.7e-1   | 202  | 179 | 262.9265   | 231.7871 | AAL94954.1  Rod shape-determining protein mreB                 |                         |    |    |   |   |   |   |
|         |                        |                      |          |          | 181  | 180 | 181.0000   | 251.7137 |                                                                |                         |    |    |   |   |   |   |

Show detected proteins only  
 Show all proteins  
 Filter by category:

Proteins found:  
1358

Test Cutoff

| Signif | Direction | Applies To   |
|--------|-----------|--------------|
| yes    | +         | ratios, bars |
| no     | n/a       | bars         |
| yes    | -         | ratios, bars |
| yes    | +         | p-, q-Values |
| yes    | -         | p-, q-Values |

Fn Summary Table FnPg vs Fn FnSg vs Fn FnPgSg vs Fn FnPgSg vs FnPg FnSg vs FnPg FnPgSg vs FnSg Fn Coverage

| Protein | FnSg vs Fn             |                      |          |          | Raw  |      | Normalized |           | Description                                                               | Log <sub>2</sub> Ratios |    |    |   |   |   |   |
|---------|------------------------|----------------------|----------|----------|------|------|------------|-----------|---------------------------------------------------------------------------|-------------------------|----|----|---|---|---|---|
|         | Log <sub>2</sub> Ratio | Log <sub>2</sub> Sum | q-Value  | p-Value  | FnSg | Fn   | FnSg       | Fn        |                                                                           | -6                      | -4 | -2 | 0 | 2 | 4 | 6 |
| FN0761  | 0.070                  | 8.459                | 1.305e-1 | 7.978e-1 | 18   | 11   | 23.4291    | 14.2439   | AAL94957.1  Bvg accessory factor                                          |                         |    |    |   |   |   |   |
|         |                        |                      |          |          | 15   | 16   | 15.0000    | 22.3746   |                                                                           |                         |    |    |   |   |   |   |
| FN0765  | -2.020                 | 5.190                |          |          |      | 8    |            | 10.3592   | AAL94961.1  tRNA (5-methylaminomethyl-2-thiouridylate) -methyltransferase |                         |    |    |   |   |   |   |
|         |                        |                      |          |          | 3    | 10   | 3.0000     | 13.9841   |                                                                           |                         |    |    |   |   |   |   |
| FN0766  |                        |                      |          |          |      | 15   |            | 19.4235   | AAL94962.1  Large-conductance mechanosensitive channel                    |                         |    |    |   |   |   |   |
|         |                        |                      |          |          |      | 16   |            | 22.3746   |                                                                           |                         |    |    |   |   |   |   |
| FN0768  |                        |                      |          |          |      | 10   |            | 12.9490   | AAL94964.1  Hemin receptor                                                |                         |    |    |   |   |   |   |
|         |                        |                      |          |          |      | 8    |            | 11.1873   |                                                                           |                         |    |    |   |   |   |   |
| FN0771  | -1.844                 | 6.738                |          |          | 3    |      | 3.9048     |           | AAL94967.1  Oxygen-independent coproporphyrinogen III oxidase             |                         |    |    |   |   |   |   |
|         |                        |                      |          |          | 7    | 14   | 7.0000     | 19.5777   |                                                                           |                         |    |    |   |   |   |   |
| FN0772  |                        |                      |          |          |      | 7    |            | 9.0643    | AAL94968.1  Flavodoxin                                                    |                         |    |    |   |   |   |   |
|         |                        |                      |          |          |      | 3    |            | 4.1952    |                                                                           |                         |    |    |   |   |   |   |
| FN0774  | -3.087                 | 12.161               | 1.752e-5 | 1.35e-5  | 18   | 148  | 23.4291    | 191.6452  | AAL94970.1  Hypothetical cytosolic protein                                |                         |    |    |   |   |   |   |
|         |                        |                      |          |          | 23   | 145  | 23.0000    | 202.7694  |                                                                           |                         |    |    |   |   |   |   |
| FN0775  | -0.491                 | 16.796               | 1.102e-4 | 1.771e-4 | 229  | 313  | 298.0702   | 405.3038  | AAL94971.1  Aspartyl aminopeptidase                                       |                         |    |    |   |   |   |   |
|         |                        |                      |          |          | 271  | 282  | 271.0000   | 394.3515  |                                                                           |                         |    |    |   |   |   |   |
| FN0776  | 0.001                  | 13.548               | 1.573e-1 | 9.918e-1 | 86   | 75   | 111.9390   | 97.1175   | AAL94972.1  Aspartate-ammonia ligase                                      |                         |    |    |   |   |   |   |
|         |                        |                      |          |          | 107  | 87   | 107.0000   | 121.6616  |                                                                           |                         |    |    |   |   |   |   |
| FN0777  | 0.035                  | 12.600               | 1.364e-1 | 8.395e-1 | 68   | 50   | 88.5099    | 64.7450   | AAL94973.1  GTP-binding protein lepA                                      |                         |    |    |   |   |   |   |
|         |                        |                      |          |          | 71   | 65   | 71.0000    | 90.8966   |                                                                           |                         |    |    |   |   |   |   |
| FN0778  | -0.442                 | 9.755                | 5.398e-4 | 1.358e-3 | 18   | 27   | 23.4291    | 34.9623   | AAL94974.1  Methyltransferase                                             |                         |    |    |   |   |   |   |
|         |                        |                      |          |          | 27   | 24   | 27.0000    | 33.5618   |                                                                           |                         |    |    |   |   |   |   |
| FN0779  |                        |                      |          |          | 6    |      | 7.8097     |           | AAL94975.1  Putative GTPases (G3E family)                                 |                         |    |    |   |   |   |   |
|         |                        |                      |          |          | 11   |      | 11.0000    |           |                                                                           |                         |    |    |   |   |   |   |
| FN0783  | -0.196                 | 22.959               | 1.153e-2 | 5.503e-2 | 1871 | 2445 | 2435.3246  | 3166.0311 | AAL94979.1  acyl-CoA dehydrogenase                                        |                         |    |    |   |   |   |   |
|         |                        |                      |          |          | 2900 | 2107 | 2900.0000  | 2946.4493 |                                                                           |                         |    |    |   |   |   |   |
| FN0784  | -0.325                 | 22.572               | 7.081e-3 | 3.113e-2 | 1910 | 2170 | 2486.0876  | 2809.9335 | AAL94980.1  Electron transfer flavoprotein beta-subunit                   |                         |    |    |   |   |   |   |
|         |                        |                      |          |          | 1976 | 1988 | 1976.0000  | 2780.0385 |                                                                           |                         |    |    |   |   |   |   |
| FN0785  | -0.067                 | 21.932               | 1.008e-1 | 5.956e-1 | 1307 | 1670 | 1701.2128  | 2162.4834 | AAL94981.1  Electron transfer flavoprotein alpha-subunit                  |                         |    |    |   |   |   |   |
|         |                        |                      |          |          | 2208 | 1381 | 2208.0000  | 1931.2038 |                                                                           |                         |    |    |   |   |   |   |
| FN0788  | 0.484                  | 9.531                | 9.059e-3 | 4.156e-2 | 21   | 15   | 27.3339    | 19.4235   | AAL94984.1  unknown                                                       |                         |    |    |   |   |   |   |
|         |                        |                      |          |          | 37   | 19   | 37.0000    | 26.5698   |                                                                           |                         |    |    |   |   |   |   |

Show detected proteins only  
 Show all proteins  
 Filter by category:

Proteins found: 1358

Test Cutoff

| Signif | Direction | Applies To   |
|--------|-----------|--------------|
| yes    | +         | ratios, bars |
| no     | n/a       | bars         |
| yes    | -         | ratios, bars |
| yes    | +         | p-, q-Values |
| yes    | -         |              |

Fn Summary Table FnPg vs Fn FnSg vs Fn FnPgSg vs Fn FnPgSg vs FnPg FnSg vs FnPg FnPgSg vs FnSg Fn Coverage

| Protein | FnSg vs Fn             |                      |          |          | Raw  |      | Normalized |           | Description                                               | Log <sub>2</sub> Ratios |    |    |   |   |
|---------|------------------------|----------------------|----------|----------|------|------|------------|-----------|-----------------------------------------------------------|-------------------------|----|----|---|---|
|         | Log <sub>2</sub> Ratio | Log <sub>2</sub> Sum | q-Value  | p-Value  | FnSg | Fn   | FnSg       | Fn        |                                                           | -6                      | -4 | -2 | 0 | 2 |
| FN0790  | -0.605                 | 7.860                | 1.985e-5 | 1.632e-5 | 9    | 15   | 11.7145    | 19.4235   | AAL94986.1  Xylose repressor                              |                         |    |    |   |   |
|         |                        |                      |          |          | 13   | 13   | 13.0000    | 18.1793   |                                                           |                         |    |    |   |   |
| FN0791  | -0.247                 | 18.614               | 2.21e-2  | 1.143e-1 | 513  | 558  | 667.7293   | 722.5543  | AAL94987.1  Histidine ammonia-lyase                       |                         |    |    |   |   |
|         |                        |                      |          |          | 495  | 470  | 495.0000   | 657.2526  |                                                           |                         |    |    |   |   |
| FN0792  | 0.238                  | 20.822               | 5.849e-4 | 1.504e-3 | 1095 | 1002 | 1425.2701  | 1297.4900 | AAL94988.1  Urocanate hydratase                           |                         |    |    |   |   |
|         |                        |                      |          |          | 1532 | 865  | 1532.0000  | 1209.6244 |                                                           |                         |    |    |   |   |
| FN0793  |                        |                      |          |          |      | 17   |            | 22.0133   | AAL94989.1  Sodium/glutamate symport carrier protein      |                         |    |    |   |   |
|         |                        |                      |          |          |      | 15   |            | 20.9761   |                                                           |                         |    |    |   |   |
| FN0794  | 1.117                  | 7.976                | 1.338e-4 | 2.299e-4 | 19   | 8    | 24.7307    | 10.3592   | AAL94990.1  Hypothetical protein                          |                         |    |    |   |   |
|         |                        |                      |          |          | 22   | 8    | 22.0000    | 11.1873   |                                                           |                         |    |    |   |   |
| FN0796  | -0.217                 | 15.204               | 1.154e-3 | 3.536e-3 | 144  | 168  | 187.4328   | 217.5432  | AAL94992.1  Pyruvate,phosphate dikinase                   |                         |    |    |   |   |
|         |                        |                      |          |          | 173  | 144  | 173.0000   | 201.3710  |                                                           |                         |    |    |   |   |
| FN0798  | 1.292                  | 8.982                | 2.66e-2  | 1.401e-1 | 41   | 6    | 53.3663    | 7.7694    | AAL94994.1  Fructose-1,6-bisphosphatase                   |                         |    |    |   |   |
|         |                        |                      |          |          | 17   | 15   | 17.0000    | 20.9761   |                                                           |                         |    |    |   |   |
| FN0799  | 0.442                  | 8.575                | 8.966e-3 | 4.105e-2 | 15   | 14   | 19.5242    | 18.1286   | AAL94995.1  Isoamylase                                    |                         |    |    |   |   |
|         |                        |                      |          |          | 26   | 11   | 26.0000    | 15.3825   |                                                           |                         |    |    |   |   |
| FN0800  | 0.133                  | 10.934               | 4.685e-2 | 2.599e-1 | 32   | 35   | 41.6517    | 45.3215   | AAL94996.1  Amino acid-binding protein                    |                         |    |    |   |   |
|         |                        |                      |          |          | 51   | 28   | 51.0000    | 39.1555   |                                                           |                         |    |    |   |   |
| FN0801  | 0.906                  | 8.105                | 6.488e-6 | 2.993e-6 | 18   | 9    | 23.4291    | 11.6541   | AAL94997.1  Amino acid transport ATP-binding protein      |                         |    |    |   |   |
|         |                        |                      |          |          | 22   | 9    | 22.0000    | 12.5857   |                                                           |                         |    |    |   |   |
| FN0803  | -1.679                 | 12.233               | 1.802e-3 | 6.016e-3 | 25   | 114  | 32.5404    | 147.6186  | AAL94999.1  Cytochrome C-TYPE biogenesis protein ccdA     |                         |    |    |   |   |
|         |                        |                      |          |          | 45   | 72   | 45.0000    | 100.6855  |                                                           |                         |    |    |   |   |
| FN0805  | 0.966                  | 6.577                |          |          | 11   |      | 14.3178    |           | AAL95001.1  Hypothetical protein                          |                         |    |    |   |   |
|         |                        |                      |          |          | 13   | 5    | 13.0000    | 6.9920    |                                                           |                         |    |    |   |   |
| FN0806  | -0.810                 | 13.300               | 1.075e-3 | 3.245e-3 | 62   | 92   | 80.7002    | 119.1308  | AAL95002.1  SpoIID homolog                                |                         |    |    |   |   |
|         |                        |                      |          |          | 71   | 105  | 71.0000    | 146.8330  |                                                           |                         |    |    |   |   |
| FN0807  | -1.467                 | 9.175                | 3.587e-3 | 1.407e-2 | 13   | 38   | 16.9210    | 49.2062   | AAL95003.1  3-deoxy-manno-octulosonate cytidyltransferase |                         |    |    |   |   |
|         |                        |                      |          |          | 12   | 22   | 12.0000    | 30.7650   |                                                           |                         |    |    |   |   |
| FN0808  | 0.309                  | 12.415               | 3.683e-3 | 1.456e-2 | 68   | 55   | 88.5099    | 71.2195   | AAL95004.1  Phosphoglycerate mutase                       |                         |    |    |   |   |
|         |                        |                      |          |          | 76   | 44   | 76.0000    | 61.5300   |                                                           |                         |    |    |   |   |
| FN0809  | -0.780                 | 8.780                |          |          |      | 23   |            | 29.7827   | AAL95005.1  23S rRNA methyltransferase                    |                         |    |    |   |   |
|         |                        |                      |          |          | 16   | 18   | 16.0000    | 25.1714   |                                                           |                         |    |    |   |   |

Show detected proteins only  
 Show all proteins  
 Filter by category:

Proteins found: 1358

Test Cutoff

| Signif | Direction | Applies To   |
|--------|-----------|--------------|
| yes    | +         | ratios, bars |
| no     | n/a       | bars         |
| yes    | -         | ratios, bars |
| yes    | +         | p-, q-Values |
| yes    | -         |              |



Fn Summary Table

FnPg vs Fn

FnSg vs Fn

FnPgSg vs Fn

FnPgSg vs FnPg

FnSg vs FnPg

FnPgSg vs FnSg

Fn Coverage

| Protein | FnSg vs Fn             |                      |          |          | Raw  |     | Normalized |           | Description                                         | Log <sub>2</sub> Ratios |    |    |   |   |   |   |
|---------|------------------------|----------------------|----------|----------|------|-----|------------|-----------|-----------------------------------------------------|-------------------------|----|----|---|---|---|---|
|         | Log <sub>2</sub> Ratio | Log <sub>2</sub> Sum | q-Value  | p-Value  | FnSg | Fn  | FnSg       | Fn        |                                                     | -6                      | -4 | -2 | 0 | 2 | 4 | 6 |
| FN0810  | 0.027                  | 11.872               | 1.541e-1 | 9.681e-1 | 12   | 44  | 15.6194    | 56.9756   | AAL95006.1  Low-specificity threonine aldolase      |                         |    |    |   |   |   |   |
|         |                        |                      |          |          | 108  | 46  | 108.0000   | 64.3268   |                                                     |                         |    |    |   |   |   |   |
| FN0811  |                        |                      |          |          | 4    |     | 5.2065     |           | AAL95007.1  Hypothetical protein                    |                         |    |    |   |   |   |   |
|         |                        |                      |          |          | 5    |     | 5.0000     |           |                                                     |                         |    |    |   |   |   |   |
| FN0813  | 2.271                  | 9.608                | 2.515e-6 | 6.469e-7 | 49   | 11  | 63.7792    | 14.2439   | AAL95009.1  Transcriptional regulator, TetR family  |                         |    |    |   |   |   |   |
|         |                        |                      |          |          | 59   | 8   | 59.0000    | 11.1873   |                                                     |                         |    |    |   |   |   |   |
| FN0814  | -4.936                 | 12.593               | 2.075e-5 | 1.732e-5 | 8    | 322 | 10.4129    | 416.9579  | AAL95010.1  Propionate CoA-transferase              |                         |    |    |   |   |   |   |
|         |                        |                      |          |          | 18   | 324 | 18.0000    | 453.0847  |                                                     |                         |    |    |   |   |   |   |
| FN0815  |                        |                      |          |          |      | 47  |            | 60.8603   | AAL95011.1  Propionate permease                     |                         |    |    |   |   |   |   |
|         |                        |                      |          |          |      | 39  |            | 54.5380   |                                                     |                         |    |    |   |   |   |   |
| FN0816  |                        |                      |          |          |      | 228 |            | 295.2373  | AAL95012.1  dehydrogenase with MaoC-like domain     |                         |    |    |   |   |   |   |
|         |                        |                      |          |          |      | 231 |            | 323.0326  |                                                     |                         |    |    |   |   |   |   |
| FN0818  | -2.046                 | 18.049               | 3.655e-5 | 3.81e-5  | 224  | 761 | 291.5621   | 985.4191  | AAL95014.1  DNA-binding protein HU                  |                         |    |    |   |   |   |   |
|         |                        |                      |          |          | 221  | 809 | 221.0000   | 1131.3135 |                                                     |                         |    |    |   |   |   |   |
| FN0819  | -0.439                 | 12.040               | 2.865e-3 | 1.059e-2 | 38   | 53  | 49.4614    | 68.6297   | AAL95015.1  Tetratricopeptide repeat family protein |                         |    |    |   |   |   |   |
|         |                        |                      |          |          | 62   | 59  | 62.0000    | 82.5062   |                                                     |                         |    |    |   |   |   |   |
| FN0820  | -0.261                 | 14.685               | 3.42e-2  | 1.851e-1 | 91   | 134 | 118.4471   | 173.5166  | AAL95016.1  Mercuric reductase                      |                         |    |    |   |   |   |   |
|         |                        |                      |          |          | 178  | 130 | 178.0000   | 181.7933  |                                                     |                         |    |    |   |   |   |   |
| FN0821  | -1.906                 | 11.708               | 3.531e-5 | 3.619e-5 | 29   | 79  | 37.7469    | 102.2971  | AAL95017.1  Hypothetical protein                    |                         |    |    |   |   |   |   |
|         |                        |                      |          |          | 22   | 87  | 22.0000    | 121.6616  |                                                     |                         |    |    |   |   |   |   |
| FN0823  | 2.457                  | 11.051               | 2.501e-6 | 6.407e-7 | 79   | 12  | 102.8277   | 15.5388   | AAL95019.1  GTP-binding protein hflX                |                         |    |    |   |   |   |   |
|         |                        |                      |          |          | 113  | 17  | 113.0000   | 23.7730   |                                                     |                         |    |    |   |   |   |   |
| FN0824  |                        |                      |          |          | 4    |     | 5.2065     |           | AAL95020.1  hypothetical cytosolic protein          |                         |    |    |   |   |   |   |
|         |                        |                      |          |          |      |     |            |           |                                                     |                         |    |    |   |   |   |   |
| FN0825  | -1.849                 | 11.592               | 1.905e-6 | 4.211e-7 | 25   | 83  | 32.5404    | 107.4767  | AAL95021.1  Hypothetical cytosolic protein          |                         |    |    |   |   |   |   |
|         |                        |                      |          |          | 26   | 74  | 26.0000    | 103.4823  |                                                     |                         |    |    |   |   |   |   |
| FN0826  | -1.468                 | 9.967                | 3.602e-4 | 8.111e-4 | 20   | 37  | 26.0323    | 47.9113   | AAL95022.1  periplasmic component of efflux system  |                         |    |    |   |   |   |   |
|         |                        |                      |          |          | 12   | 41  | 12.0000    | 57.3348   |                                                     |                         |    |    |   |   |   |   |
| FN0827  | -0.594                 | 11.207               | 1.769e-2 | 8.952e-2 | 27   | 35  | 35.1436    | 45.3215   | AAL95023.1  ABC transporter ATP-binding protein     |                         |    |    |   |   |   |   |
|         |                        |                      |          |          | 44   | 53  | 44.0000    | 74.1157   |                                                     |                         |    |    |   |   |   |   |
| FN0828  | -1.864                 | 6.988                | 2.085e-4 | 4.025e-4 | 6    | 17  | 7.8097     | 22.0133   | AAL95024.1  ABC transporter permease protein        |                         |    |    |   |   |   |   |
|         |                        |                      |          |          | 4    | 15  | 4.0000     | 20.9761   |                                                     |                         |    |    |   |   |   |   |

Show detected proteins only  
 Show all proteins  
 Filter by category:

Proteins found: 1358

Enter (or paste) list of ORFs

Find ORFs

Test Cutoff

q-Value

p-Value

.005

| Signif | Direction | Applies To   |
|--------|-----------|--------------|
| yes    | +         | ratios, bars |
| no     | n/a       | bars         |
| yes    | -         | ratios, bars |
| yes    | +         | p-, q-Values |
| yes    | -         | p-, q-Values |

Dot Plots Dot Plots

Fn Summary Table

FnPg vs Fn

FnSg vs Fn

FnPgSg vs Fn

FnPgSg vs FnPg

FnSg vs FnPg

FnPgSg vs FnSg

Fn Coverage

| Protein | FnSg vs Fn             |                      |          |          | Raw  |     | Normalized |          | Description                                         | Log <sub>2</sub> Ratios |    |    |   |   |   |   |
|---------|------------------------|----------------------|----------|----------|------|-----|------------|----------|-----------------------------------------------------|-------------------------|----|----|---|---|---|---|
|         | Log <sub>2</sub> Ratio | Log <sub>2</sub> Sum | q-Value  | p-Value  | FnSg | Fn  | FnSg       | Fn       |                                                     | -6                      | -4 | -2 | 0 | 2 | 4 | 6 |
| FN0830  | 1.224                  | 11.557               | 1.181e-4 | 1.94e-4  | 59   | 22  | 76.7954    | 28.4878  | AAL95026.1  Hypothetical protein                    |                         |    |    |   |   |   |   |
|         |                        |                      |          |          | 91   | 31  | 91.0000    | 43.3507  |                                                     |                         |    |    |   |   |   |   |
| FN0832  | -1.488                 | 11.225               | 9.803e-5 | 1.524e-4 | 18   | 65  | 23.4291    | 84.1685  | AAL95028.1  Hypothetical protein                    |                         |    |    |   |   |   |   |
|         |                        |                      |          |          | 35   | 57  | 35.0000    | 79.7094  |                                                     |                         |    |    |   |   |   |   |
| FN0833  | -1.099                 | 10.852               | 1.368e-3 | 4.349e-3 | 29   | 41  | 37.7469    | 53.0909  | AAL95029.1  Hypothetical protein                    |                         |    |    |   |   |   |   |
|         |                        |                      |          |          | 21   | 52  | 21.0000    | 72.7173  |                                                     |                         |    |    |   |   |   |   |
| FN0834  | -1.783                 | 9.118                | 2.469e-5 | 2.207e-5 | 8    | 33  | 10.4129    | 42.7317  | AAL95030.1  Hypothetical Exported Protein           |                         |    |    |   |   |   |   |
|         |                        |                      |          |          | 15   | 32  | 15.0000    | 44.7491  |                                                     |                         |    |    |   |   |   |   |
| FN0836  | -0.069                 | 7.941                | 9.826e-2 | 5.79e-1  | 12   | 14  | 15.6194    | 18.1286  | AAL95032.1  Hypothetical protein                    |                         |    |    |   |   |   |   |
|         |                        |                      |          |          | 15   | 10  | 15.0000    | 13.9841  |                                                     |                         |    |    |   |   |   |   |
| FN0837  |                        |                      |          |          |      |     |            |          | AAL95033.1  Integrase/recombinase                   |                         |    |    |   |   |   |   |
|         |                        |                      |          |          | 8    |     | 8.0000     |          |                                                     |                         |    |    |   |   |   |   |
| FN0846  | -0.255                 | 13.195               | 1.815e-2 | 9.21e-2  | 74   | 91  | 96.3196    | 117.8359 | AAL95042.1  Hypothetical Exported Protein           |                         |    |    |   |   |   |   |
|         |                        |                      |          |          | 81   | 67  | 81.0000    | 93.6935  |                                                     |                         |    |    |   |   |   |   |
| FN0847  | -1.184                 | 8.319                | 7.413e-5 | 1.081e-4 | 9    | 20  | 11.7145    | 25.8980  | AAL95043.1  TPR-repeat-containing proteins          |                         |    |    |   |   |   |   |
|         |                        |                      |          |          | 12   | 20  | 12.0000    | 27.9682  |                                                     |                         |    |    |   |   |   |   |
| FN0849  | 0.565                  | 11.018               | 1.443e-3 | 4.635e-3 | 39   | 33  | 50.7630    | 42.7317  | AAL95045.1  8-amino-7-oxononanoate synthase         |                         |    |    |   |   |   |   |
|         |                        |                      |          |          | 60   | 23  | 60.0000    | 32.1634  |                                                     |                         |    |    |   |   |   |   |
| FN0850  | 1.012                  | 10.133               | 2.691e-5 | 2.476e-5 | 37   | 17  | 48.1598    | 22.0133  | AAL95046.1  Hypothetical cytosolic protein          |                         |    |    |   |   |   |   |
|         |                        |                      |          |          | 47   | 18  | 47.0000    | 25.1714  |                                                     |                         |    |    |   |   |   |   |
| FN0853  | 0.915                  | 12.750               | 1.01e-3  | 3.013e-3 | 96   | 48  | 124.9552   | 62.1552  | AAL95049.1  Glycogen synthase                       |                         |    |    |   |   |   |   |
|         |                        |                      |          |          | 103  | 42  | 103.0000   | 58.7332  |                                                     |                         |    |    |   |   |   |   |
| FN0854  | 1.493                  | 13.145               | 4.839e-5 | 5.831e-5 | 114  | 39  | 148.3843   | 50.5011  | AAL95050.1  Glucose-1-phosphate adenylyltransferase |                         |    |    |   |   |   |   |
|         |                        |                      |          |          | 171  | 45  | 171.0000   | 62.9284  |                                                     |                         |    |    |   |   |   |   |
| FN0855  | 1.104                  | 15.358               | 5.2e-5   | 6.425e-5 | 238  | 109 | 309.7847   | 141.1441 | AAL95051.1  Glucose-1-phosphate adenylyltransferase |                         |    |    |   |   |   |   |
|         |                        |                      |          |          | 291  | 99  | 291.0000   | 138.4426 |                                                     |                         |    |    |   |   |   |   |
| FN0856  | 0.971                  | 13.500               | 1.32e-4  | 2.256e-4 | 124  | 55  | 161.4005   | 71.2195  | AAL95052.1  1,4-alpha-glucan branching enzyme       |                         |    |    |   |   |   |   |
|         |                        |                      |          |          | 140  | 59  | 140.0000   | 82.5062  |                                                     |                         |    |    |   |   |   |   |
| FN0857  | 0.743                  | 16.433               | 5.978e-5 | 7.818e-5 | 304  | 192 | 395.6914   | 248.6208 | AAL95053.1  Glycogen phosphorylase                  |                         |    |    |   |   |   |   |
|         |                        |                      |          |          | 374  | 151 | 374.0000   | 211.1599 |                                                     |                         |    |    |   |   |   |   |
| FN0858  | 1.165                  | 10.752               | 1.401e-2 | 6.904e-2 | 31   | 18  | 40.3501    | 23.3082  | AAL95054.1  4-alpha-glucanotransferase              |                         |    |    |   |   |   |   |
|         |                        |                      |          |          | 84   | 23  | 84.0000    | 32.1634  |                                                     |                         |    |    |   |   |   |   |

Show detected proteins only

Show all proteins

Filter by category:

GO: amino acid transport

Proteins found: 1358

Enter (or paste) list of ORFs

Find ORFs

Test Cutoff

q-Value p-Value

.005

| Signif | Direction | Applies To   |
|--------|-----------|--------------|
| yes    | +         | ratios, bars |
| no     | n/a       | bars         |
| yes    | -         | ratios, bars |
| yes    | +         | p-, q-Values |
| yes    | -         | p-, q-Values |

Dot Plots

Fn Summary Table FnPg vs Fn FnSg vs Fn FnPgSg vs Fn FnPgSg vs FnPg FnSg vs FnPg FnPgSg vs FnSg Fn Coverage

| Protein | FnSg vs Fn             |                      |          |          | Raw  |     | Normalized |          | Description                                                  | Log <sub>2</sub> Ratios |    |    |   |   |
|---------|------------------------|----------------------|----------|----------|------|-----|------------|----------|--------------------------------------------------------------|-------------------------|----|----|---|---|
|         | Log <sub>2</sub> Ratio | Log <sub>2</sub> Sum | q-Value  | p-Value  | FnSg | Fn  | FnSg       | Fn       |                                                              | -6                      | -4 | -2 | 0 | 2 |
| FN0865  | 2.373                  | 13.122               | 4.153e-6 | 1.431e-6 | 172  | 36  | 223.8780   | 46.6164  | AAL95061.1  unknown                                          |                         |    |    |   |   |
|         |                        |                      |          |          | 206  | 26  | 206.0000   | 36.3587  |                                                              |                         |    |    |   |   |
| FN0867  | -1.510                 | 13.119               | 1.533e-6 | 3.026e-7 | 39   | 126 | 50.7630    | 163.1574 | AAL95063.1  Long-chain-fatty-acid--CoA ligase                |                         |    |    |   |   |
|         |                        |                      |          |          | 61   | 111 | 61.0000    | 155.2235 |                                                              |                         |    |    |   |   |
| FN0868  | -0.117                 | 6.117                |          |          |      | 8   |            | 10.3592  | AAL95064.1  ATPases of the PP superfamily                    |                         |    |    |   |   |
|         |                        |                      |          |          | 8    | 5   | 8.0000     | 6.9920   |                                                              |                         |    |    |   |   |
| FN0869  | 0.239                  | 5.851                |          |          | 5    |     | 6.5081     |          | AAL95065.1  Hydrolase (HAD superfamily)                      |                         |    |    |   |   |
|         |                        |                      |          |          | 10   | 5   | 10.0000    | 6.9920   |                                                              |                         |    |    |   |   |
| FN0870  |                        |                      |          |          |      |     |            |          | AAL95066.1  Rhodanese-related sulfurtransferases             |                         |    |    |   |   |
|         |                        |                      |          |          |      | 5   |            | 6.9920   |                                                              |                         |    |    |   |   |
| FN0871  | -0.520                 | 7.278                | 2.177e-2 | 1.125e-1 | 6    | 9   | 7.8097     | 11.6541  | AAL95067.1  3-dehydroquinate synthase                        |                         |    |    |   |   |
|         |                        |                      |          |          | 13   | 13  | 13.0000    | 18.1793  |                                                              |                         |    |    |   |   |
| FN0873  | 1.275                  | 10.316               | 2.23e-3  | 7.777e-3 | 50   | 16  | 65.0808    | 20.7184  | AAL95069.1  Protease IV                                      |                         |    |    |   |   |
|         |                        |                      |          |          | 46   | 18  | 46.0000    | 25.1714  |                                                              |                         |    |    |   |   |
| FN0874  |                        |                      |          |          |      |     |            |          | AAL95070.1  Phosphohydrolase (MUTT/NUDIX family protein)     |                         |    |    |   |   |
|         |                        |                      |          |          | 5    |     | 5.0000     |          |                                                              |                         |    |    |   |   |
| FN0875  |                        |                      |          |          | 6    |     | 7.8097     |          | AAL95071.1  23S rRNA methyltransferase                       |                         |    |    |   |   |
|         |                        |                      |          |          |      |     |            |          |                                                              |                         |    |    |   |   |
| FN0878  | 0.183                  | 9.147                | 5.429e-2 | 3.049e-1 | 19   | 14  | 24.7307    | 18.1286  | AAL95074.1  Transcriptional regulator, GntR family           |                         |    |    |   |   |
|         |                        |                      |          |          | 26   | 19  | 26.0000    | 26.5698  |                                                              |                         |    |    |   |   |
| FN0884  |                        |                      |          |          | 3    |     | 3.9048     |          | AAL95079.1  Hemin transport system permease protein hmuU     |                         |    |    |   |   |
|         |                        |                      |          |          |      |     |            |          |                                                              |                         |    |    |   |   |
| FN0885  |                        |                      |          |          |      |     |            |          | AAL95081.1  Hemin-binding periplasmic protein hmuT precursor |                         |    |    |   |   |
|         |                        |                      |          |          |      | 10  |            | 13.9841  |                                                              |                         |    |    |   |   |
| FN0886  |                        |                      |          |          |      |     |            |          | AAL95082.1  Hemin receptor                                   |                         |    |    |   |   |
|         |                        |                      |          |          |      | 15  |            | 19.4235  |                                                              |                         |    |    |   |   |
| FN0887  | -1.043                 | 11.455               | 8.556e-6 | 4.576e-6 | 26   | 57  | 33.8420    | 73.8093  | AAL95083.1  Oligoendopeptidase F                             |                         |    |    |   |   |
|         |                        |                      |          |          | 40   | 56  | 40.0000    | 78.3109  |                                                              |                         |    |    |   |   |
| FN0888  |                        |                      |          |          |      | 29  |            | 37.5521  | AAL95084.1  Uracil permease                                  |                         |    |    |   |   |
|         |                        |                      |          |          |      | 27  |            | 37.7571  |                                                              |                         |    |    |   |   |
| FN0889  | -0.253                 | 6.592                |          |          |      | 9   |            | 11.6541  | AAL95085.1  hypothetical protein                             |                         |    |    |   |   |
|         |                        |                      |          |          | 9    | 7   | 9.0000     | 9.7889   |                                                              |                         |    |    |   |   |

Show detected proteins only  
 Show all proteins  
 Filter by category:

Proteins found: 1358

Enter (or paste) list of ORFs

Find ORFs

Test Cutoff

q-Value

p-Value

.005

| Signif | Direction | Applies To   |
|--------|-----------|--------------|
| yes    | +         | ratios, bars |
| no     | n/a       | bars         |
| yes    | -         | ratios, bars |
| yes    | +         | p-, q-Values |
| yes    | -         | p-, q-Values |

Dot Plots  Dot Plots

Fn Summary Table FnPg vs Fn FnSg vs Fn FnPgSg vs Fn FnPgSg vs FnPg FnSg vs FnPg FnPgSg vs FnSg Fn Coverage

| Protein | FnSg vs Fn             |                      |          |          | Raw  |     | Normalized |          | Description                                                                        | Log <sub>2</sub> Ratios |    |    |   |   |   |   |
|---------|------------------------|----------------------|----------|----------|------|-----|------------|----------|------------------------------------------------------------------------------------|-------------------------|----|----|---|---|---|---|
|         | Log <sub>2</sub> Ratio | Log <sub>2</sub> Sum | q-Value  | p-Value  | FnSg | Fn  | FnSg       | Fn       |                                                                                    | -6                      | -4 | -2 | 0 | 2 | 4 | 6 |
| FN0892  |                        |                      |          |          | 10   |     | 13.0162    |          | AAL95088.1  Phosphoserine phosphatase                                              |                         |    |    |   |   |   |   |
|         |                        |                      |          |          | 5    |     | 5.0000     |          |                                                                                    |                         |    |    |   |   |   |   |
| FN0893  | -0.571                 | 8.186                |          |          |      | 17  |            | 22.0133  | AAL95089.1  Hypothetical protein                                                   |                         |    |    |   |   |   |   |
|         |                        |                      |          |          | 14   | 14  | 14.0000    | 19.5777  |                                                                                    |                         |    |    |   |   |   |   |
| FN0896  | -1.044                 | 7.977                | 1.496e-4 | 2.678e-4 | 7    | 19  | 9.1113     | 24.6031  | AAL95092.1  Hypothetical protein                                                   |                         |    |    |   |   |   |   |
|         |                        |                      |          |          | 13   | 15  | 13.0000    | 20.9761  |                                                                                    |                         |    |    |   |   |   |   |
| FN0898  |                        |                      |          |          | 6    |     | 7.8097     |          | AAL95094.1  Hypothetical protein                                                   |                         |    |    |   |   |   |   |
|         |                        |                      |          |          | 6    |     | 6.0000     |          |                                                                                    |                         |    |    |   |   |   |   |
| FN0900  | 1.716                  | 6.927                |          |          |      | 4   |            | 5.1796   | AAL95096.1  Metal dependent hydrolase                                              |                         |    |    |   |   |   |   |
|         |                        |                      |          |          | 20   | 5   | 20.0000    | 6.9920   |                                                                                    |                         |    |    |   |   |   |   |
| FN0901  | 1.053                  | 6.665                |          |          | 10   |     | 13.0162    |          | AAL95097.1  DNA polymerase, bacteriophage-type                                     |                         |    |    |   |   |   |   |
|         |                        |                      |          |          | 16   | 5   | 16.0000    | 6.9920   |                                                                                    |                         |    |    |   |   |   |   |
| FN0903  | 0.982                  | 8.331                | 4.677e-4 | 1.124e-3 | 18   | 10  | 23.4291    | 12.9490  | AAL95099.1  Polysialic acid capsule expression protein kpsF                        |                         |    |    |   |   |   |   |
|         |                        |                      |          |          | 27   | 9   | 27.0000    | 12.5857  |                                                                                    |                         |    |    |   |   |   |   |
| FN0905  |                        |                      |          |          |      | 17  |            | 22.0133  | AAL95101.1  Hypothetical protein                                                   |                         |    |    |   |   |   |   |
|         |                        |                      |          |          |      | 15  |            | 20.9761  |                                                                                    |                         |    |    |   |   |   |   |
| FN0906  | 0.421                  | 9.992                | 3.309e-3 | 1.269e-2 | 26   | 21  | 33.8420    | 27.1929  | AAL95102.1  Glycerol-3-phosphate dehydrogenase [NAD(P)+]                           |                         |    |    |   |   |   |   |
|         |                        |                      |          |          | 40   | 20  | 40.0000    | 27.9682  |                                                                                    |                         |    |    |   |   |   |   |
| FN0908  | -1.015                 | 8.896                | 5.304e-4 | 1.328e-3 | 9    | 22  | 11.7145    | 28.4878  | AAL95104.1  Tpl protein                                                            |                         |    |    |   |   |   |   |
|         |                        |                      |          |          | 19   | 24  | 19.0000    | 33.5618  |                                                                                    |                         |    |    |   |   |   |   |
| FN0910  | -0.352                 | 5.732                | 9.654e-2 | 5.678e-1 | 3    | 3   | 3.9048     | 3.8847   | AAL95106.1  Nicotinate-nucleotide--dimethylbenzimidazole phosphoribosyltransferase |                         |    |    |   |   |   |   |
|         |                        |                      |          |          | 9    | 9   | 9.0000     | 12.5857  |                                                                                    |                         |    |    |   |   |   |   |
| FN0911  | -0.764                 | 6.276                | 1.296e-3 | 4.076e-3 | 5    | 8   | 6.5081     | 10.3592  | AAL95107.1  Alpha-ribazole-5'-phosphate phosphatase                                |                         |    |    |   |   |   |   |
|         |                        |                      |          |          | 7    | 9   | 7.0000     | 12.5857  |                                                                                    |                         |    |    |   |   |   |   |
| FN0912  |                        |                      |          |          | 9    |     | 11.7145    |          | AAL95108.1  Cobalamin [5'-phosphate] synthase                                      |                         |    |    |   |   |   |   |
|         |                        |                      |          |          | 7    |     | 7.0000     |          |                                                                                    |                         |    |    |   |   |   |   |
| FN0913  | -0.237                 | 6.237                |          |          |      | 7   |            | 9.0643   | AAL95109.1  Cobinamide kinase                                                      |                         |    |    |   |   |   |   |
|         |                        |                      |          |          | 8    | 7   | 8.0000     | 9.7889   |                                                                                    |                         |    |    |   |   |   |   |
| FN0915  | 1.056                  | 10.765               | 3.335e-3 | 1.282e-2 | 54   | 22  | 70.2873    | 28.4878  | AAL95111.1  PTS system, N-acetylglucosamine-specific IIA component                 |                         |    |    |   |   |   |   |
|         |                        |                      |          |          | 50   | 21  | 50.0000    | 29.3666  |                                                                                    |                         |    |    |   |   |   |   |
| FN0916  | -0.058                 | 15.153               | 8.072e-2 | 4.666e-1 | 153  | 141 | 199.1473   | 182.5809 | AAL95112.1  Hypothetical Exported Protein                                          |                         |    |    |   |   |   |   |
|         |                        |                      |          |          | 175  | 148 | 175.0000   | 206.9646 |                                                                                    |                         |    |    |   |   |   |   |

Show detected proteins only  
 Show all proteins  
 Filter by category:

Proteins found: 1358

Test Cutoff

| Signif | Direction | Applies To   |
|--------|-----------|--------------|
| yes    | +         | ratios, bars |
| no     | n/a       | bars         |
| yes    | -         | ratios, bars |
| yes    | +         | p-, q-Values |
| yes    | -         |              |

Fn Summary Table

FnPg vs Fn

FnSg vs Fn

FnPgSg vs Fn

FnPgSg vs FnPg

FnSg vs FnPg

FnPgSg vs FnSg

Fn Coverage

| Protein | FnSg vs Fn             |                      |          |          | Raw  |     | Normalized |          | Description                                         | Log <sub>2</sub> Ratios |    |    |   |   |   |   |
|---------|------------------------|----------------------|----------|----------|------|-----|------------|----------|-----------------------------------------------------|-------------------------|----|----|---|---|---|---|
|         | Log <sub>2</sub> Ratio | Log <sub>2</sub> Sum | q-Value  | p-Value  | FnSg | Fn  | FnSg       | Fn       |                                                     | -6                      | -4 | -2 | 0 | 2 | 4 | 6 |
| FN0917  | 0.180                  | 7.233                | 1.004e-1 | 5.928e-1 | 7    | 7   | 9.1113     | 9.0643   | AAL95113.1  Hypothetical protein                    |                         |    |    |   |   |   |   |
|         |                        |                      |          |          | 17   | 10  | 17.0000    | 13.9841  |                                                     |                         |    |    |   |   |   |   |
| FN0920  |                        |                      |          |          |      | 7   |            | 9.7889   | AAL95116.1  Protease HTPX                           |                         |    |    |   |   |   |   |
|         |                        |                      |          |          |      |     |            |          |                                                     |                         |    |    |   |   |   |   |
| FN0921  | 1.838                  | 8.123                | 1.24e-4  | 2.07e-4  | 27   | 5   | 35.1436    | 6.4745   | AAL95117.1  Hypothetical protein                    |                         |    |    |   |   |   |   |
|         |                        |                      |          |          | 28   | 8   | 28.0000    | 11.1873  |                                                     |                         |    |    |   |   |   |   |
| FN0925  | -0.349                 | 7.023                | 7.453e-2 | 4.28e-1  | 4    | 8   | 5.2065     | 10.3592  | AAL95121.1  Hypothetical protein                    |                         |    |    |   |   |   |   |
|         |                        |                      |          |          | 15   | 11  | 15.0000    | 15.3825  |                                                     |                         |    |    |   |   |   |   |
| FN0926  | 2.328                  | 8.244                |          |          | 30   | 6   | 39.0485    | 7.7694   | AAL95122.1  GTP pyrophosphokinase                   |                         |    |    |   |   |   |   |
|         |                        |                      |          |          | 39   |     | 39.0000    |          |                                                     |                         |    |    |   |   |   |   |
| FN0928  | -0.189                 | 6.172                |          |          | 3    | 7   | 3.9048     | 9.0643   | AAL95124.1  O-sialoglycoprotein endopeptidase       |                         |    |    |   |   |   |   |
|         |                        |                      |          |          | 12   |     | 12.0000    |          |                                                     |                         |    |    |   |   |   |   |
| FN0929  |                        |                      |          |          | 22   |     | 28.6356    |          | AAL95125.1  ATP/GTP hydrolase                       |                         |    |    |   |   |   |   |
|         |                        |                      |          |          | 26   |     | 26.0000    |          |                                                     |                         |    |    |   |   |   |   |
| FN0930  | -2.011                 | 6.654                |          |          |      | 16  |            | 20.7184  | AAL95126.1  Glycerol-3-phosphate cytidyltransferase |                         |    |    |   |   |   |   |
|         |                        |                      |          |          | 5    | 14  | 5.0000     | 19.5777  |                                                     |                         |    |    |   |   |   |   |
| FN0932  | -0.123                 | 8.440                | 1.146e-1 | 6.879e-1 | 9    | 16  | 11.7145    | 20.7184  | AAL95128.1  Hypothetical protein                    |                         |    |    |   |   |   |   |
|         |                        |                      |          |          | 24   | 13  | 24.0000    | 18.1793  |                                                     |                         |    |    |   |   |   |   |
| FN0934  | 1.772                  | 8.230                | 2.848e-3 | 1.051e-2 | 30   | 8   | 39.0485    | 10.3592  | AAL95130.1  Chorismate synthase                     |                         |    |    |   |   |   |   |
|         |                        |                      |          |          | 25   | 6   | 25.0000    | 8.3905   |                                                     |                         |    |    |   |   |   |   |
| FN0938  |                        |                      |          |          | 42   |     | 54.6679    |          | AAL95134.1  Hypothetical protein                    |                         |    |    |   |   |   |   |
|         |                        |                      |          |          | 37   |     | 37.0000    |          |                                                     |                         |    |    |   |   |   |   |
| FN0940  |                        |                      |          |          | 14   |     | 18.2226    |          | AAL95136.1  Hypothetical protein                    |                         |    |    |   |   |   |   |
|         |                        |                      |          |          | 24   |     | 24.0000    |          |                                                     |                         |    |    |   |   |   |   |
| FN0941  | 0.983                  | 10.104               | 7.167e-3 | 3.159e-2 | 44   | 17  | 57.2711    | 22.0133  | AAL95137.1  Gamma-glutamyltranspeptidase            |                         |    |    |   |   |   |   |
|         |                        |                      |          |          | 36   | 18  | 36.0000    | 25.1714  |                                                     |                         |    |    |   |   |   |   |
| FN0943  | 1.376                  | 7.849                | 8.893e-3 | 4.065e-2 | 13   | 7   | 16.9210    | 9.0643   | AAL95139.1  Sensory Transduction Protein Kinase     |                         |    |    |   |   |   |   |
|         |                        |                      |          |          | 32   | 7   | 32.0000    | 9.7889   |                                                     |                         |    |    |   |   |   |   |
| FN0947  | -1.150                 | 12.309               | 8.938e-4 | 2.6e-3   | 32   | 71  | 41.6517    | 91.9379  | AAL95143.1  Hypothetical protein                    |                         |    |    |   |   |   |   |
|         |                        |                      |          |          | 54   | 86  | 54.0000    | 120.2632 |                                                     |                         |    |    |   |   |   |   |
| FN0949  | -2.512                 | 14.308               | 4.18e-5  | 4.698e-5 | 44   | 251 | 57.2711    | 325.0200 | AAL95145.1  DNA helicase                            |                         |    |    |   |   |   |   |
|         |                        |                      |          |          | 62   | 254 | 62.0000    | 355.1961 |                                                     |                         |    |    |   |   |   |   |

Show detected proteins only  
 Show all proteins  
 Filter by category:

Proteins found: 1358

Test Cutoff

| Signif | Direction | Applies To   |
|--------|-----------|--------------|
| yes    | +         | ratios, bars |
| no     | n/a       | bars         |
| yes    | -         | ratios, bars |
| yes    | +         | p-, q-Values |
| yes    | -         | p-, q-Values |

Fn Summary Table

FnPg vs Fn

FnSg vs Fn

FnPgSg vs Fn

FnPgSg vs FnPg

FnSg vs FnPg

FnPgSg vs FnSg

Fn Coverage

| Protein | FnSg vs Fn             |                      |          |          | Raw  |    | Normalized |         | Description                                                        | Log <sub>2</sub> Ratios |    |    |   |   |   |   |
|---------|------------------------|----------------------|----------|----------|------|----|------------|---------|--------------------------------------------------------------------|-------------------------|----|----|---|---|---|---|
|         | Log <sub>2</sub> Ratio | Log <sub>2</sub> Sum | q-Value  | p-Value  | FnSg | Fn | FnSg       | Fn      |                                                                    | -6                      | -4 | -2 | 0 | 2 | 4 | 6 |
| FN0951  | -1.474                 | 7.089                |          |          |      | 16 |            | 20.7184 | AAL95147.1  Precorrin-3B C17-methyltransferase                     |                         |    |    |   |   |   |   |
|         |                        |                      |          |          | 7    | 13 | 7.0000     | 18.1793 |                                                                    |                         |    |    |   |   |   |   |
| FN0952  |                        |                      |          |          |      |    |            |         | AAL95148.1  Cobalamin biosynthesis protein G                       |                         |    |    |   |   |   |   |
|         |                        |                      |          |          |      | 6  |            | 8.3905  |                                                                    |                         |    |    |   |   |   |   |
| FN0957  | -0.807                 | 7.335                | 1.344e-2 | 6.575e-2 | 4    | 13 | 5.2065     | 16.8337 | AAL95153.1  Precorrin-4 C11-methyltransferase                      |                         |    |    |   |   |   |   |
|         |                        |                      |          |          | 14   | 12 | 14.0000    | 16.7809 |                                                                    |                         |    |    |   |   |   |   |
| FN0958  | -1.973                 | 7.588                |          |          |      | 23 |            | 29.7827 | AAL95154.1  unknown                                                |                         |    |    |   |   |   |   |
|         |                        |                      |          |          | 7    | 18 | 7.0000     | 25.1714 |                                                                    |                         |    |    |   |   |   |   |
| FN0959  | -2.898                 | 7.542                |          |          |      | 23 |            | 29.7827 | AAL95155.1  Precorrin-2 C20-methyltransferase                      |                         |    |    |   |   |   |   |
|         |                        |                      |          |          | 5    | 32 | 5.0000     | 44.7491 |                                                                    |                         |    |    |   |   |   |   |
| FN0961  | 1.938                  | 7.463                |          |          |      | 4  |            | 5.1796  | AAL95157.1  Hypothetical protein                                   |                         |    |    |   |   |   |   |
|         |                        |                      |          |          | 26   | 6  | 26.0000    | 8.3905  |                                                                    |                         |    |    |   |   |   |   |
| FN0962  | -1.888                 | 9.545                | 1.759e-5 | 1.358e-5 | 8    | 38 | 10.4129    | 49.2062 | AAL95158.1  Hypothetical cytosolic protein                         |                         |    |    |   |   |   |   |
|         |                        |                      |          |          | 18   | 40 | 18.0000    | 55.9364 |                                                                    |                         |    |    |   |   |   |   |
| FN0964  |                        |                      |          |          | 7    |    | 9.1113     |         | AAL95160.1  Precorrin-8W decarboxylase                             |                         |    |    |   |   |   |   |
|         |                        |                      |          |          | 8    |    | 8.0000     |         |                                                                    |                         |    |    |   |   |   |   |
| FN0965  | 0.869                  | 11.020               | 6.598e-3 | 2.859e-2 | 57   | 24 | 74.1921    | 31.0776 | AAL95161.1  D-3-phosphoglycerate dehydrogenase                     |                         |    |    |   |   |   |   |
|         |                        |                      |          |          | 49   | 26 | 49.0000    | 36.3587 |                                                                    |                         |    |    |   |   |   |   |
| FN0966  |                        |                      |          |          |      |    |            |         | AAL95162.1  Precorrin-6Y C5,15-methyltransferase (decarboxylating) |                         |    |    |   |   |   |   |
|         |                        |                      |          |          | 5    |    | 5.0000     |         |                                                                    |                         |    |    |   |   |   |   |
| FN0967  |                        |                      |          |          |      |    |            |         | AAL95163.1  CbiD protein                                           |                         |    |    |   |   |   |   |
|         |                        |                      |          |          | 6    |    | 6.0000     |         |                                                                    |                         |    |    |   |   |   |   |
| FN0970  | -1.208                 | 8.061                | 2.347e-3 | 8.283e-3 | 5    | 20 | 6.5081     | 25.8980 | AAL95166.1  Precorrin-8X methylmutase                              |                         |    |    |   |   |   |   |
|         |                        |                      |          |          | 15   | 17 | 15.0000    | 23.7730 |                                                                    |                         |    |    |   |   |   |   |
| FN0971  |                        |                      |          |          | 4    |    | 5.2065     |         | AAL95167.1  hypothetical cytosolic protein                         |                         |    |    |   |   |   |   |
|         |                        |                      |          |          |      |    |            |         |                                                                    |                         |    |    |   |   |   |   |
| FN0972  |                        |                      |          |          | 8    |    | 10.4129    |         | AAL95168.1  Cobyrinic acid a,c-diamide synthase                    |                         |    |    |   |   |   |   |
|         |                        |                      |          |          | 32   |    | 32.0000    |         |                                                                    |                         |    |    |   |   |   |   |
| FN0976  | 0.356                  | 11.171               | 3.725e-2 | 2.029e-1 | 32   | 31 | 41.6517    | 40.1419 | AAL95172.1  Hypothetical protein                                   |                         |    |    |   |   |   |   |
|         |                        |                      |          |          | 67   | 32 | 67.0000    | 44.7491 |                                                                    |                         |    |    |   |   |   |   |
| FN0977  | 1.904                  | 8.650                |          |          | 35   | 8  | 45.5566    | 10.3592 | AAL95173.1  Cobyrinic acid synthase                                |                         |    |    |   |   |   |   |
|         |                        |                      |          |          | 32   |    | 32.0000    |         |                                                                    |                         |    |    |   |   |   |   |

Show detected proteins only  
 Show all proteins  
 Filter by category:

Proteins found:  
1358

Enter (or paste) list of ORFs

Test Cutoff

| Signif | Direction | Applies To   |
|--------|-----------|--------------|
| yes    | +         | ratios, bars |
| no     | n/a       | bars         |
| yes    | -         | ratios, bars |
| yes    | +         | p-, q-Values |
| yes    | -         |              |

Fn Summary Table FnPg vs Fn FnSg vs Fn FnPgSg vs Fn FnPgSg vs FnPg FnSg vs FnPg FnPgSg vs FnSg Fn Coverage

| Protein | FnSg vs Fn             |                      |          |          | Raw  |      |           |           | Normalized                                                               |    |      |    | Description | Log <sub>2</sub> Ratios |    |    |   |   |   |   |
|---------|------------------------|----------------------|----------|----------|------|------|-----------|-----------|--------------------------------------------------------------------------|----|------|----|-------------|-------------------------|----|----|---|---|---|---|
|         | Log <sub>2</sub> Ratio | Log <sub>2</sub> Sum | q-Value  | p-Value  | FnSg | Fn   | FnSg      | Fn        | FnSg                                                                     | Fn | FnSg | Fn |             | -6                      | -4 | -2 | 0 | 2 | 4 | 6 |
| FN0981  | -1.046                 | 12.949               | 1.416e-3 | 4.534e-3 | 59   | 98   | 76.7954   | 126.9002  | AAL95177.1  Phosphoribosylamine--glycine ligase                          |    |      |    |             |                         |    |    |   |   |   |   |
|         |                        |                      |          |          | 47   | 92   | 47.0000   | 128.6537  |                                                                          |    |      |    |             |                         |    |    |   |   |   |   |
| FN0982  | -0.717                 | 16.261               | 7.407e-5 | 1.079e-4 | 180  | 272  | 234.2910  | 352.2129  | AAL95178.1  Phosphoribosylaminoimidazolecarboxamide formyltransferase    |    |      |    |             |                         |    |    |   |   |   |   |
|         |                        |                      |          |          | 203  | 262  | 203.0000  | 366.3833  |                                                                          |    |      |    |             |                         |    |    |   |   |   |   |
| FN0983  | -0.131                 | 14.870               | 3.37e-2  | 1.821e-1 | 115  | 135  | 149.6859  | 174.8115  | AAL95179.1  Hypothetical protein                                         |    |      |    |             |                         |    |    |   |   |   |   |
|         |                        |                      |          |          | 181  | 134  | 181.0000  | 187.3869  |                                                                          |    |      |    |             |                         |    |    |   |   |   |   |
| FN0984  | 1.135                  | 10.768               | 2.169e-6 | 5.104e-7 | 49   | 23   | 63.7792   | 29.7827   | AAL95180.1  Tetracenomycin polyketide synthesis O-methyltransferase tcmP |    |      |    |             |                         |    |    |   |   |   |   |
|         |                        |                      |          |          | 60   | 19   | 60.0000   | 26.5698   |                                                                          |    |      |    |             |                         |    |    |   |   |   |   |
| FN0985  | 0.877                  | 7.512                | 3.077e-3 | 1.159e-2 | 12   | 10   | 15.6194   | 12.9490   | AAL95181.1  Phosphoribosylglycinamide formyltransferase                  |    |      |    |             |                         |    |    |   |   |   |   |
|         |                        |                      |          |          | 21   | 5    | 21.0000   | 6.9920    |                                                                          |    |      |    |             |                         |    |    |   |   |   |   |
| FN0986  | 0.475                  | 15.021               | 3.343e-2 | 1.805e-1 | 119  | 119  | 154.8924  | 154.0931  | AAL95182.1  Phosphoribosylformylglycinamide cyclase                      |    |      |    |             |                         |    |    |   |   |   |   |
|         |                        |                      |          |          | 275  | 111  | 275.0000  | 155.2235  |                                                                          |    |      |    |             |                         |    |    |   |   |   |   |
| FN0987  | 0.022                  | 14.528               | 1.348e-1 | 8.278e-1 | 112  | 106  | 145.7811  | 137.2594  | AAL95183.1  Amidophosphoribosyltransferase                               |    |      |    |             |                         |    |    |   |   |   |   |
|         |                        |                      |          |          | 164  | 120  | 164.0000  | 167.8092  |                                                                          |    |      |    |             |                         |    |    |   |   |   |   |
| FN0988  | -0.386                 | 16.254               | 1.078e-2 | 5.092e-2 | 156  | 243  | 203.0522  | 314.6608  | AAL95184.1  Phosphoribosylamidoimidazole-succinocarboxamide synthase     |    |      |    |             |                         |    |    |   |   |   |   |
|         |                        |                      |          |          | 286  | 232  | 286.0000  | 324.4311  |                                                                          |    |      |    |             |                         |    |    |   |   |   |   |
| FN0989  | 0.205                  | 15.133               | 7.669e-2 | 4.414e-1 | 116  | 141  | 150.9875  | 182.5809  | AAL95185.1  Phosphoribosylaminoimidazole carboxylase catalytic subunit   |    |      |    |             |                         |    |    |   |   |   |   |
|         |                        |                      |          |          | 256  | 122  | 256.0000  | 170.6060  |                                                                          |    |      |    |             |                         |    |    |   |   |   |   |
| FN0990  | 0.344                  | 21.397               | 1.098e-5 | 6.798e-6 | 1412 | 1164 | 1837.8826 | 1507.2639 | AAL95186.1  Phosphoribosylformylglycinamide synthase                     |    |      |    |             |                         |    |    |   |   |   |   |
|         |                        |                      |          |          | 1907 | 1032 | 1907.0000 | 1443.1588 |                                                                          |    |      |    |             |                         |    |    |   |   |   |   |
| FN0991  | 0.565                  | 9.062                | 8.382e-3 | 3.79e-2  | 24   | 11   | 31.2388   | 14.2439   | AAL95187.1  CDP-diacylglycerol--serine O-phosphatidyltransferase         |    |      |    |             |                         |    |    |   |   |   |   |
|         |                        |                      |          |          | 25   | 17   | 25.0000   | 23.7730   |                                                                          |    |      |    |             |                         |    |    |   |   |   |   |
| FN0992  | -0.278                 | 10.387               | 6.06e-3  | 2.585e-2 | 28   | 32   | 36.4453   | 41.4368   | AAL95188.1  ADP-heptose:LPS heptosyltransferase II                       |    |      |    |             |                         |    |    |   |   |   |   |
|         |                        |                      |          |          | 30   | 28   | 30.0000   | 39.1555   |                                                                          |    |      |    |             |                         |    |    |   |   |   |   |
| FN0994  | -0.481                 | 13.827               | 1.253e-2 | 6.059e-2 | 60   | 112  | 78.0970   | 145.0288  | AAL95190.1  Hypothetical protein                                         |    |      |    |             |                         |    |    |   |   |   |   |
|         |                        |                      |          |          | 126  | 100  | 126.0000  | 139.8410  |                                                                          |    |      |    |             |                         |    |    |   |   |   |   |
| FN0997  | 0.845                  | 11.311               | 3.85e-3  | 1.54e-2  | 60   | 30   | 78.0970   | 38.8470   | AAL95193.1  Hypothetical protein                                         |    |      |    |             |                         |    |    |   |   |   |   |
|         |                        |                      |          |          | 57   | 26   | 57.0000   | 36.3587   |                                                                          |    |      |    |             |                         |    |    |   |   |   |   |
| FN0998  | 0.938                  | 15.794               | 2.681e-5 | 2.464e-5 | 248  | 132  | 322.8009  | 170.9268  | AAL95194.1  Dipeptide-binding protein                                    |    |      |    |             |                         |    |    |   |   |   |   |
|         |                        |                      |          |          | 337  | 124  | 337.0000  | 173.4028  |                                                                          |    |      |    |             |                         |    |    |   |   |   |   |
| FN0999  | 0.532                  | 10.149               | 6.355e-3 | 2.734e-2 | 30   | 26   | 39.0485   | 33.6674   | AAL95195.1  Deblocking aminopeptidase                                    |    |      |    |             |                         |    |    |   |   |   |   |
|         |                        |                      |          |          | 42   | 16   | 42.0000   | 22.3746   |                                                                          |    |      |    |             |                         |    |    |   |   |   |   |

Show detected proteins only  
 Show all proteins  
 Filter by category:

Proteins found: 1358

Test Cutoff

| Signif | Direction | Applies To   |
|--------|-----------|--------------|
| yes    | +         | ratios, bars |
| no     | n/a       | bars         |
| yes    | -         | ratios, bars |
| yes    | +         | p-, q-Values |
| yes    | -         | p-, q-Values |

Fn Summary Table FnPg vs Fn FnSg vs Fn FnPgSg vs Fn FnPgSg vs FnPg FnSg vs FnPg FnPgSg vs FnSg Fn Coverage

| Protein | FnSg vs Fn             |                      |          |          | Raw  |     | Normalized |          | Description                                                            | Log <sub>2</sub> Ratios |    |    |   |   |   |   |
|---------|------------------------|----------------------|----------|----------|------|-----|------------|----------|------------------------------------------------------------------------|-------------------------|----|----|---|---|---|---|
|         | Log <sub>2</sub> Ratio | Log <sub>2</sub> Sum | q-Value  | p-Value  | FnSg | Fn  | FnSg       | Fn       |                                                                        | -6                      | -4 | -2 | 0 | 2 | 4 | 6 |
| FN1000  |                        |                      |          |          |      | 63  |            | 81.5787  | AAL95196.1  Biotin synthase                                            |                         |    |    |   |   |   |   |
|         |                        |                      |          |          |      | 52  |            | 72.7173  |                                                                        |                         |    |    |   |   |   |   |
| FN1001  | 0.526                  | 10.371               | 7.727e-4 | 2.185e-3 | 31   | 22  | 40.3501    | 28.4878  | AAL95197.1  Dethiobiotin synthetase                                    |                         |    |    |   |   |   |   |
|         |                        |                      |          |          | 47   | 23  | 47.0000    | 32.1634  |                                                                        |                         |    |    |   |   |   |   |
| FN1002  | -1.433                 | 10.841               | 7.26e-5  | 1.046e-4 | 17   | 59  | 22.1275    | 76.3991  | AAL95198.1  Adenosylmethionine-8-amino-7-oxononanoate aminotransferase |                         |    |    |   |   |   |   |
|         |                        |                      |          |          | 30   | 46  | 30.0000    | 64.3268  |                                                                        |                         |    |    |   |   |   |   |
| FN1003  | 1.665                  | 12.176               | 3.113e-4 | 6.751e-4 | 84   | 32  | 109.3358   | 41.4368  | AAL95199.1  Outer membrane protein P1 precursor                        |                         |    |    |   |   |   |   |
|         |                        |                      |          |          | 133  | 25  | 133.0000   | 34.9602  |                                                                        |                         |    |    |   |   |   |   |
| FN1004  | 0.192                  | 8.589                | 1.141e-1 | 6.845e-1 | 23   | 10  | 29.9372    | 12.9490  | AAL95200.1  Transcriptional regulator, TetR family                     |                         |    |    |   |   |   |   |
|         |                        |                      |          |          | 12   | 17  | 12.0000    | 23.7730  |                                                                        |                         |    |    |   |   |   |   |
| FN1005  | -0.969                 | 12.157               | 4.793e-4 | 1.161e-3 | 45   | 78  | 58.5727    | 101.0022 | AAL95201.1  Hypothetical protein                                       |                         |    |    |   |   |   |   |
|         |                        |                      |          |          | 38   | 63  | 38.0000    | 88.0998  |                                                                        |                         |    |    |   |   |   |   |
| FN1006  |                        |                      |          |          | 12   |     |            | 12.0000  | AAL95202.1  Acetyltransferase                                          |                         |    |    |   |   |   |   |
| FN1008  |                        |                      |          |          |      | 4   |            | 5.1796   | AAL95204.1  Hypothetical protein                                       |                         |    |    |   |   |   |   |
| FN1009  |                        |                      |          |          |      | 8   |            | 10.3592  | AAL95205.1  Hypothetical protein                                       |                         |    |    |   |   |   |   |
|         |                        |                      |          |          |      | 3   |            | 4.1952   |                                                                        |                         |    |    |   |   |   |   |
| FN1010  | -0.758                 | 14.147               | 2.453e-4 | 4.93e-4  | 90   | 128 | 117.1455   | 165.7472 | AAL95206.1  Hypothetical cytosolic protein                             |                         |    |    |   |   |   |   |
|         |                        |                      |          |          | 90   | 132 | 90.0000    | 184.5901 |                                                                        |                         |    |    |   |   |   |   |
| FN1011  | -0.124                 | 7.260                | 1.113e-1 | 6.653e-1 | 9    | 7   | 11.7145    | 9.0643   | AAL95207.1  MGPA protein                                               |                         |    |    |   |   |   |   |
|         |                        |                      |          |          | 12   | 12  | 12.0000    | 16.7809  |                                                                        |                         |    |    |   |   |   |   |
| FN1012  | 0.830                  | 9.761                | 3.931e-3 | 1.577e-2 | 25   | 19  | 32.5404    | 24.6031  | AAL95208.1  HPR(Ser) kinase                                            |                         |    |    |   |   |   |   |
|         |                        |                      |          |          | 46   | 14  | 46.0000    | 19.5777  |                                                                        |                         |    |    |   |   |   |   |
| FN1014  | 0.418                  | 9.669                | 4.723e-2 | 2.622e-1 | 33   | 23  | 42.9533    | 29.7827  | AAL95210.1  Folylpolyglutamate synthase                                |                         |    |    |   |   |   |   |
|         |                        |                      |          |          | 23   | 14  | 23.0000    | 19.5777  |                                                                        |                         |    |    |   |   |   |   |
| FN1015  | -1.189                 | 8.409                | 6.532e-3 | 2.825e-2 | 8    | 16  | 10.4129    | 20.7184  | AAL95211.1  5'-methylthioadenosine nucleosidase                        |                         |    |    |   |   |   |   |
|         |                        |                      |          |          | 14   | 25  | 14.0000    | 34.9602  |                                                                        |                         |    |    |   |   |   |   |
| FN1016  | 0.269                  | 9.840                | 1.155e-2 | 5.513e-2 | 28   | 21  | 36.4453    | 27.1929  | AAL95212.1  Lipid A biosynthesis lauroyl acyltransferase               |                         |    |    |   |   |   |   |
|         |                        |                      |          |          | 30   | 20  | 30.0000    | 27.9682  |                                                                        |                         |    |    |   |   |   |   |
| FN1017  | -0.888                 | 13.443               | 3.443e-4 | 7.683e-4 | 70   | 104 | 91.1132    | 134.6696 | AAL95213.1  Hypothetical Exported Protein                              |                         |    |    |   |   |   |   |
|         |                        |                      |          |          | 64   | 109 | 64.0000    | 152.4267 |                                                                        |                         |    |    |   |   |   |   |

Show detected proteins only  
 Show all proteins  
 Filter by category:

Proteins found:  
1358

Test Cutoff

| Signif | Direction | Applies To   |
|--------|-----------|--------------|
| yes    | +         | ratios, bars |
| no     | n/a       | bars         |
| yes    | -         | ratios, bars |
| yes    | +         | p-, q-Values |
| yes    | -         |              |



Fn Summary Table

FnPg vs Fn

FnSg vs Fn

FnPgSg vs Fn

FnPgSg vs FnPg

FnSg vs FnPg

FnPgSg vs FnSg

Fn Coverage

| Protein | FnSg vs Fn             |                      |          |          | Raw  |      |           |           | Normalized                                                   |    |      |    | Description | Log <sub>2</sub> Ratios |    |    |   |   |   |   |
|---------|------------------------|----------------------|----------|----------|------|------|-----------|-----------|--------------------------------------------------------------|----|------|----|-------------|-------------------------|----|----|---|---|---|---|
|         | Log <sub>2</sub> Ratio | Log <sub>2</sub> Sum | q-Value  | p-Value  | FnSg | Fn   | FnSg      | Fn        | FnSg                                                         | Fn | FnSg | Fn |             |                         |    |    |   |   |   |   |
|         |                        |                      |          |          |      |      |           |           |                                                              |    |      |    |             | -6                      | -4 | -2 | 0 | 2 | 4 | 6 |
| FN1019  | 1.342                  | 22.254               | 4.353e-5 | 4.996e-5 | 2651 | 1077 | 3450.5855 | 1394.6076 | AAL95215.1  3-hydroxybutyryl-CoA dehydrogenase               |    |      |    |             |                         |    |    |   |   |   |   |
|         |                        |                      |          |          | 3671 | 1012 | 3671.0000 | 1415.1906 |                                                              |    |      |    |             |                         |    |    |   |   |   |   |
| FN1020  | 1.016                  | 16.956               | 7.01e-3  | 3.075e-2 | 478  | 195  | 622.1727  | 252.5055  | AAL95216.1  3-hydroxybutyryl-CoA dehydratase                 |    |      |    |             |                         |    |    |   |   |   |   |
|         |                        |                      |          |          | 392  | 178  | 392.0000  | 248.9169  |                                                              |    |      |    |             |                         |    |    |   |   |   |   |
| FN1022  |                        |                      |          |          |      | 26   |           | 33.6674   | AAL95218.1  Calcium-transporting ATPase                      |    |      |    |             |                         |    |    |   |   |   |   |
|         |                        |                      |          |          |      | 45   |           | 62.9284   |                                                              |    |      |    |             |                         |    |    |   |   |   |   |
| FN1023  |                        |                      |          |          | 24   |      | 31.2388   |           | AAL95219.1  5-Nitroimidazole antibiotic resistance protein   |    |      |    |             |                         |    |    |   |   |   |   |
|         |                        |                      |          |          | 15   |      | 15.0000   |           |                                                              |    |      |    |             |                         |    |    |   |   |   |   |
| FN1024  | -0.340                 | 20.600               | 1.236e-2 | 5.962e-2 | 726  | 1079 | 944.9736  | 1397.1974 | AAL95220.1  DNA-binding protein HU                           |    |      |    |             |                         |    |    |   |   |   |   |
|         |                        |                      |          |          | 1296 | 1029 | 1296.0000 | 1438.9636 |                                                              |    |      |    |             |                         |    |    |   |   |   |   |
| FN1025  | -0.683                 | 7.327                |          |          |      | 14   |           | 18.1286   | AAL95221.1  Guanine-hypoxanthine permease                    |    |      |    |             |                         |    |    |   |   |   |   |
|         |                        |                      |          |          | 10   | 10   | 10.0000   | 13.9841   |                                                              |    |      |    |             |                         |    |    |   |   |   |   |
| FN1026  | -1.144                 | 6.314                |          |          |      | 14   |           | 18.1286   | AAL95222.1  tRNA pseudouridine synthase A                    |    |      |    |             |                         |    |    |   |   |   |   |
|         |                        |                      |          |          | 6    | 6    | 6.0000    | 8.3905    |                                                              |    |      |    |             |                         |    |    |   |   |   |   |
| FN1028  | -0.896                 | 10.271               | 8.173e-3 | 3.679e-2 | 25   | 46   | 32.5404   | 59.5654   | AAL95224.1  Deoxyuridine 5'-triphosphate nucleotidohydrolase |    |      |    |             |                         |    |    |   |   |   |   |
|         |                        |                      |          |          | 19   | 26   | 19.0000   | 36.3587   |                                                              |    |      |    |             |                         |    |    |   |   |   |   |
| FN1029  | -1.376                 | 12.703               | 1.812e-5 | 1.419e-5 | 41   | 106  | 53.3663   | 137.2594  | AAL95225.1  Zinc protease                                    |    |      |    |             |                         |    |    |   |   |   |   |
|         |                        |                      |          |          | 48   | 90   | 48.0000   | 125.8569  |                                                              |    |      |    |             |                         |    |    |   |   |   |   |
| FN1030  | 2.408                  | 6.323                |          |          | 14   | 3    | 18.2226   | 3.8847    | AAL95226.1  Hypothetical membrane-spanning protein           |    |      |    |             |                         |    |    |   |   |   |   |
|         |                        |                      |          |          | 23   |      | 23.0000   |           |                                                              |    |      |    |             |                         |    |    |   |   |   |   |
| FN1031  | 0.112                  | 6.807                |          |          |      | 6    |           | 7.7694    | AAL95227.1  Hypothetical membrane-spanning protein           |    |      |    |             |                         |    |    |   |   |   |   |
|         |                        |                      |          |          | 11   | 9    | 11.0000   | 12.5857   |                                                              |    |      |    |             |                         |    |    |   |   |   |   |
| FN1033  | -0.763                 | 12.293               | 2.02e-3  | 6.894e-3 | 49   | 81   | 63.7792   | 104.8869  | AAL95229.1  Methyltransferase                                |    |      |    |             |                         |    |    |   |   |   |   |
|         |                        |                      |          |          | 45   | 57   | 45.0000   | 79.7094   |                                                              |    |      |    |             |                         |    |    |   |   |   |   |
| FN1034  |                        |                      |          |          | 5    |      | 6.5081    |           | AAL95230.1  Transcriptional regulator, TetR family           |    |      |    |             |                         |    |    |   |   |   |   |
|         |                        |                      |          |          | 13   |      | 13.0000   |           |                                                              |    |      |    |             |                         |    |    |   |   |   |   |
| FN1035  |                        |                      |          |          | 3    |      | 3.0000    |           | AAL95231.1  Iron-sulfur flavoprotein                         |    |      |    |             |                         |    |    |   |   |   |   |
|         |                        |                      |          |          | 3    |      | 3.9048    |           | AAL95232.1  Hypothetical protein                             |    |      |    |             |                         |    |    |   |   |   |   |
| FN1036  |                        |                      |          |          | 4    |      | 4.0000    |           |                                                              |    |      |    |             |                         |    |    |   |   |   |   |
|         |                        |                      |          |          | 11   |      | 14.3178   |           | AAL95233.1  Hypothetical cytosolic protein                   |    |      |    |             |                         |    |    |   |   |   |   |
| FN1037  |                        |                      |          |          | 20   |      | 20.0000   |           |                                                              |    |      |    |             |                         |    |    |   |   |   |   |

Show detected proteins only  
 Show all proteins  
 Filter by category:

Proteins found: 1358

Enter (or paste) list of ORFs

Find ORFs

Test Cutoff

q-Value p-Value

.005

| Signif | Direction | Applies To   |
|--------|-----------|--------------|
| yes    | +         | ratios, bars |
| no     | n/a       | bars         |
| yes    | -         | ratios, bars |
| yes    | +         | p-, q-Values |
| yes    | -         | p-, q-Values |

Dot Plots Dot Plots

Fn Summary Table FnPg vs Fn FnSg vs Fn FnPgSg vs Fn FnPgSg vs FnPg FnSg vs FnPg FnPgSg vs FnSg Fn Coverage

| Protein | FnSg vs Fn             |                      |          |          | Raw  |     | Normalized |          | Description                                         | Log <sub>2</sub> Ratios |    |    |   |   |   |   |
|---------|------------------------|----------------------|----------|----------|------|-----|------------|----------|-----------------------------------------------------|-------------------------|----|----|---|---|---|---|
|         | Log <sub>2</sub> Ratio | Log <sub>2</sub> Sum | q-Value  | p-Value  | FnSg | Fn  | FnSg       | Fn       |                                                     | -6                      | -4 | -2 | 0 | 2 | 4 | 6 |
| FN1041  |                        |                      |          |          | 11   |     | 14.3178    |          | AAL95237.1  Acetyltransferase                       |                         |    |    |   |   |   |   |
|         |                        |                      |          |          | 19   |     | 19.0000    |          |                                                     |                         |    |    |   |   |   |   |
| FN1042  | -2.845                 | 11.186               | 1.938e-5 | 1.574e-5 | 10   | 107 | 13.0162    | 138.5543 | AAL95238.1  S1 RNA binding domain                   |                         |    |    |   |   |   |   |
|         |                        |                      |          |          | 23   | 86  | 23.0000    | 120.2632 |                                                     |                         |    |    |   |   |   |   |
| FN1045  |                        |                      |          |          |      | 7   |            | 9.0643   | AAL95241.1  Hypothetical protein                    |                         |    |    |   |   |   |   |
|         |                        |                      |          |          |      | 4   |            | 5.5936   |                                                     |                         |    |    |   |   |   |   |
| FN1048  |                        |                      |          |          | 3    |     | 3.9048     |          | AAL95244.1  Hypothetical membrane-spanning protein  |                         |    |    |   |   |   |   |
|         |                        |                      |          |          |      |     |            |          |                                                     |                         |    |    |   |   |   |   |
| FN1050  |                        |                      |          |          |      | 7   |            | 9.0643   | AAL95246.1  Lactoylglutathione lyase                |                         |    |    |   |   |   |   |
|         |                        |                      |          |          |      |     |            |          |                                                     |                         |    |    |   |   |   |   |
| FN1055  | 0.291                  | 12.045               | 8.966e-3 | 4.105e-2 | 59   | 40  | 76.7954    | 51.7960  | AAL95251.1  Cysteine synthase                       |                         |    |    |   |   |   |   |
|         |                        |                      |          |          | 67   | 47  | 67.0000    | 65.7253  |                                                     |                         |    |    |   |   |   |   |
| FN1057  | 0.533                  | 6.990                | 7.972e-2 | 4.603e-1 | 17   | 8   | 22.1275    | 10.3592  | AAL95253.1  Diamine acetyltransferase               |                         |    |    |   |   |   |   |
|         |                        |                      |          |          | 5    | 6   | 5.0000     | 8.3905   |                                                     |                         |    |    |   |   |   |   |
| FN1060  | 0.612                  | 10.239               | 1.057e-3 | 3.183e-3 | 33   | 24  | 42.9533    | 31.0776  | AAL95256.1  hypothetical cytosolic protein          |                         |    |    |   |   |   |   |
|         |                        |                      |          |          | 43   | 18  | 43.0000    | 25.1714  |                                                     |                         |    |    |   |   |   |   |
| FN1062  | -1.435                 | 11.992               | 5.281e-4 | 1.32e-3  | 22   | 80  | 28.6356    | 103.5920 | AAL95258.1  Hydrolase                               |                         |    |    |   |   |   |   |
|         |                        |                      |          |          | 49   | 76  | 49.0000    | 106.2791 |                                                     |                         |    |    |   |   |   |   |
| FN1063  | 1.285                  | 8.472                | 8.544e-3 | 3.876e-2 | 16   | 10  | 20.8259    | 12.9490  | AAL95259.1  N-acyl-L-amino acid amidohydrolase      |                         |    |    |   |   |   |   |
|         |                        |                      |          |          | 38   | 8   | 38.0000    | 11.1873  |                                                     |                         |    |    |   |   |   |   |
| FN1066  | 0.902                  | 7.375                | 1.146e-5 | 7.309e-6 | 14   | 7   | 18.2226    | 9.0643   | AAL95262.1  Exodeoxyribonuclease VII large subunit  |                         |    |    |   |   |   |   |
|         |                        |                      |          |          | 17   | 7   | 17.0000    | 9.7889   |                                                     |                         |    |    |   |   |   |   |
| FN1067  | -0.182                 | 12.727               | 3.395e-2 | 1.836e-1 | 65   | 75  | 84.6051    | 97.1175  | AAL95263.1  Tetratricopeptide repeat family protein |                         |    |    |   |   |   |   |
|         |                        |                      |          |          | 70   | 56  | 70.0000    | 78.3109  |                                                     |                         |    |    |   |   |   |   |
| FN1068  |                        |                      |          |          | 16   |     | 20.8259    |          | AAL95264.1  Smf protein                             |                         |    |    |   |   |   |   |
|         |                        |                      |          |          | 13   |     | 13.0000    |          |                                                     |                         |    |    |   |   |   |   |
| FN1069  | -1.288                 | 11.991               | 5.692e-4 | 1.452e-3 | 22   | 73  | 28.6356    | 94.5277  | AAL95265.1  DNA topoisomerase I                     |                         |    |    |   |   |   |   |
|         |                        |                      |          |          | 53   | 75  | 53.0000    | 104.8807 |                                                     |                         |    |    |   |   |   |   |
| FN1070  | -1.303                 | 7.724                | 9.517e-4 | 2.805e-3 | 5    | 18  | 6.5081     | 23.3082  | AAL95266.1  Glucose inhibited division protein A    |                         |    |    |   |   |   |   |
|         |                        |                      |          |          | 12   | 16  | 12.0000    | 22.3746  |                                                     |                         |    |    |   |   |   |   |
| FN1071  | -0.484                 | 4.484                |          |          |      |     |            |          | AAL95267.1  Integrase/recombinase                   |                         |    |    |   |   |   |   |
|         |                        |                      |          |          | 4    | 4   | 4.0000     | 5.5936   |                                                     |                         |    |    |   |   |   |   |

Show detected proteins only  
 Show all proteins  
 Filter by category:

Proteins found:  
1358

Test Cutoff

| Signif | Direction | Applies To   |
|--------|-----------|--------------|
| yes    | +         | ratios, bars |
| no     | n/a       | bars         |
| yes    | -         | ratios, bars |
| yes    | +         | p-, q-Values |
| yes    | -         |              |

Fn Summary Table FnPg vs Fn FnSg vs Fn FnPgSg vs Fn FnPgSg vs FnPg FnSg vs FnPg FnPgSg vs FnSg Fn Coverage

| Protein | FnSg vs Fn             |                      |          |          | Raw  |     | Normalized |          | Description                                                                       | Log <sub>2</sub> Ratios |    |    |   |   |   |   |
|---------|------------------------|----------------------|----------|----------|------|-----|------------|----------|-----------------------------------------------------------------------------------|-------------------------|----|----|---|---|---|---|
|         | Log <sub>2</sub> Ratio | Log <sub>2</sub> Sum | q-Value  | p-Value  | FnSg | Fn  | FnSg       | Fn       |                                                                                   | -6                      | -4 | -2 | 0 | 2 | 4 | 6 |
| FN1072  | -1.506                 | 10.713               | 3.42e-4  | 7.616e-4 | 12   | 57  | 15.6194    | 73.8093  | AAL95268.1  GTP-binding protein                                                   |                         |    |    |   |   |   |   |
|         |                        |                      |          |          | 33   | 46  | 33.0000    | 64.3268  |                                                                                   |                         |    |    |   |   |   |   |
| FN1073  | -0.586                 | 7.052                | 3.602e-3 | 1.414e-2 | 6    | 11  | 7.8097     | 14.2439  | AAL95269.1  Hypothetical protein                                                  |                         |    |    |   |   |   |   |
|         |                        |                      |          |          | 11   | 10  | 11.0000    | 13.9841  |                                                                                   |                         |    |    |   |   |   |   |
| FN1074  | -0.271                 | 10.300               | 1.087e-2 | 5.138e-2 | 22   | 30  | 28.6356    | 38.8470  | AAL95270.1  Signal recognition particle receptor FtsY                             |                         |    |    |   |   |   |   |
|         |                        |                      |          |          | 36   | 28  | 36.0000    | 39.1555  |                                                                                   |                         |    |    |   |   |   |   |
| FN1075  |                        |                      |          |          |      |     |            |          | AAL95271.1  Hypothetical protein                                                  |                         |    |    |   |   |   |   |
|         |                        |                      |          |          | 7    |     | 7.0000     |          |                                                                                   |                         |    |    |   |   |   |   |
| FN1077  | 0.234                  | 6.594                |          |          | 11   | 7   | 14.3178    | 9.0643   | AAL95273.1  Hypothetical protein                                                  |                         |    |    |   |   |   |   |
|         |                        |                      |          |          | 7    |     | 7.0000     |          |                                                                                   |                         |    |    |   |   |   |   |
| FN1078  | -0.089                 | 15.193               | 5.043e-2 | 2.817e-1 | 144  | 142 | 187.4328   | 183.8758 | AAL95274.1  Hypothetical exported 24-amino acid repeat protein                    |                         |    |    |   |   |   |   |
|         |                        |                      |          |          | 188  | 154 | 188.0000   | 215.3551 |                                                                                   |                         |    |    |   |   |   |   |
| FN1079  | 0.970                  | 18.635               | 7.349e-4 | 2.037e-3 | 748  | 364 | 973.6092   | 471.3437 | AAL95275.1  Neutrophil-activating protein A                                       |                         |    |    |   |   |   |   |
|         |                        |                      |          |          | 812  | 315 | 812.0000   | 440.4991 |                                                                                   |                         |    |    |   |   |   |   |
| FN1080  | 0.710                  | 6.498                | 5.753e-3 | 2.432e-2 | 11   | 5   | 14.3178    | 6.4745   | AAL95276.1  Export ABC transporter                                                |                         |    |    |   |   |   |   |
|         |                        |                      |          |          | 10   | 6   | 10.0000    | 8.3905   |                                                                                   |                         |    |    |   |   |   |   |
| FN1081  |                        |                      |          |          |      | 34  |            | 44.0266  | AAL95277.1  unknown                                                               |                         |    |    |   |   |   |   |
|         |                        |                      |          |          |      | 25  |            | 34.9602  |                                                                                   |                         |    |    |   |   |   |   |
| FN1084  | -2.644                 | 10.928               | 5.242e-4 | 1.307e-3 | 11   | 97  | 14.3178    | 125.6053 | AAL95280.1  unknown                                                               |                         |    |    |   |   |   |   |
|         |                        |                      |          |          | 21   | 68  | 21.0000    | 95.0919  |                                                                                   |                         |    |    |   |   |   |   |
| FN1085  | 1.003                  | 12.351               | 6.321e-4 | 1.663e-3 | 85   | 40  | 110.6374   | 51.7960  | AAL95281.1  4-methyl-5(B-hydroxyethyl)-thiazole monophosphate biosynthesis enzyme |                         |    |    |   |   |   |   |
|         |                        |                      |          |          | 94   | 36  | 94.0000    | 50.3427  |                                                                                   |                         |    |    |   |   |   |   |
| FN1086  | 1.114                  | 7.603                | 7.851e-3 | 3.51e-2  | 20   | 6   | 26.0323    | 7.7694   | AAL95282.1  Transporter                                                           |                         |    |    |   |   |   |   |
|         |                        |                      |          |          | 15   | 8   | 15.0000    | 11.1873  |                                                                                   |                         |    |    |   |   |   |   |
| FN1088  | 0.353                  | 10.067               | 7.738e-4 | 2.19e-3  | 30   | 21  | 39.0485    | 27.1929  | AAL95284.1  NADH oxidase                                                          |                         |    |    |   |   |   |   |
|         |                        |                      |          |          | 35   | 22  | 35.0000    | 30.7650  |                                                                                   |                         |    |    |   |   |   |   |
| FN1089  | 2.829                  | 13.093               | 6.809e-4 | 1.836e-3 | 164  | 25  | 213.4651   | 32.3725  | AAL95285.1  ATP-binding protein (contains P-loop)                                 |                         |    |    |   |   |   |   |
|         |                        |                      |          |          | 285  | 27  | 285.0000   | 37.7571  |                                                                                   |                         |    |    |   |   |   |   |
| FN1091  | -0.843                 | 8.500                | 2.384e-3 | 8.445e-3 | 8    | 21  | 10.4129    | 27.1929  | AAL95287.1  Sigma factor sigB regulation protein rsbU                             |                         |    |    |   |   |   |   |
|         |                        |                      |          |          | 18   | 17  | 18.0000    | 23.7730  |                                                                                   |                         |    |    |   |   |   |   |
| FN1092  | 0.908                  | 11.784               | 1.32e-3  | 4.169e-3 | 62   | 27  | 80.7002    | 34.9623  | AAL95288.1  Hypothetical protein                                                  |                         |    |    |   |   |   |   |
|         |                        |                      |          |          | 82   | 37  | 82.0000    | 51.7412  |                                                                                   |                         |    |    |   |   |   |   |

Show detected proteins only  
 Show all proteins  
 Filter by category:

Proteins found: 1358

Test Cutoff

| Signif | Direction | Applies To   |
|--------|-----------|--------------|
| yes    | +         | ratios, bars |
| no     | n/a       | bars         |
| yes    | -         | ratios, bars |
| yes    | +         | p-, q-Values |
| yes    | -         |              |

Fn Summary Table FnPg vs Fn FnSg vs Fn FnPgSg vs Fn FnPgSg vs FnPg FnSg vs FnPg FnPgSg vs FnSg Fn Coverage

| Protein | FnSg vs Fn             |                      |          |          | Raw  |     | Normalized |          | Description                                         | Log <sub>2</sub> Ratios |    |    |   |   |   |   |
|---------|------------------------|----------------------|----------|----------|------|-----|------------|----------|-----------------------------------------------------|-------------------------|----|----|---|---|---|---|
|         | Log <sub>2</sub> Ratio | Log <sub>2</sub> Sum | q-Value  | p-Value  | FnSg | Fn  | FnSg       | Fn       |                                                     | -6                      | -4 | -2 | 0 | 2 | 4 | 6 |
| FN1093  | -1.931                 | 11.305               | 1.177e-4 | 1.931e-4 | 15   | 75  | 19.5242    | 97.1175  | AAL95289.1  Hypothetical protein                    |                         |    |    |   |   |   |   |
|         |                        |                      |          |          | 32   | 71  | 32.0000    | 99.2871  |                                                     |                         |    |    |   |   |   |   |
| FN1094  |                        |                      |          |          | 13   |     | 16.9210    |          | AAL95290.1  Dolichol-phosphate mannosyltransferase  |                         |    |    |   |   |   |   |
|         |                        |                      |          |          | 24   |     | 24.0000    |          |                                                     |                         |    |    |   |   |   |   |
| FN1096  | -0.910                 | 10.411               | 7.755e-4 | 2.196e-3 | 16   | 36  | 20.8259    | 46.6164  | AAL95292.1  Hypothetical protein                    |                         |    |    |   |   |   |   |
|         |                        |                      |          |          | 33   | 39  | 33.0000    | 54.5380  |                                                     |                         |    |    |   |   |   |   |
| FN1097  | -3.311                 | 9.311                |          |          |      | 47  |            | 60.8603  | AAL95293.1  Hypothetical protein                    |                         |    |    |   |   |   |   |
|         |                        |                      |          |          | 8    | 70  | 8.0000     | 97.8887  |                                                     |                         |    |    |   |   |   |   |
| FN1101  | 0.305                  | 5.695                |          |          |      | 5   |            | 6.4745   | AAL95297.1  ATPase                                  |                         |    |    |   |   |   |   |
|         |                        |                      |          |          | 8    |     | 8.0000     |          |                                                     |                         |    |    |   |   |   |   |
| FN1102  | -2.018                 | 8.662                |          |          |      | 28  |            | 36.2572  | AAL95298.1  tRNA 2'phosphotransferase               |                         |    |    |   |   |   |   |
|         |                        |                      |          |          | 10   | 32  | 10.0000    | 44.7491  |                                                     |                         |    |    |   |   |   |   |
| FN1103  | -0.839                 | 12.838               | 1.675e-4 | 3.098e-4 | 43   | 85  | 55.9695    | 110.0665 | AAL95299.1  Excinuclease ABC subunit A              |                         |    |    |   |   |   |   |
|         |                        |                      |          |          | 72   | 85  | 72.0000    | 118.8648 |                                                     |                         |    |    |   |   |   |   |
| FN1105  | -1.252                 | 12.275               | 5.963e-4 | 1.541e-3 | 34   | 76  | 44.2550    | 98.4124  | AAL95301.1  Hypothetical protein                    |                         |    |    |   |   |   |   |
|         |                        |                      |          |          | 47   | 85  | 47.0000    | 118.8648 |                                                     |                         |    |    |   |   |   |   |
| FN1106  | -0.775                 | 12.697               | 3.518e-4 | 7.885e-4 | 55   | 88  | 71.5889    | 113.9512 | AAL95302.1  L-serine dehydratase                    |                         |    |    |   |   |   |   |
|         |                        |                      |          |          | 53   | 71  | 53.0000    | 99.2871  |                                                     |                         |    |    |   |   |   |   |
| FN1111  | 0.485                  | 7.453                |          |          | 11   |     | 14.3178    |          | AAL95307.1  Dipeptide-binding protein               |                         |    |    |   |   |   |   |
|         |                        |                      |          |          | 17   | 8   | 17.0000    | 11.1873  |                                                     |                         |    |    |   |   |   |   |
| FN1117  | -1.871                 | 9.855                | 8.249e-4 | 2.362e-3 | 16   | 37  | 20.8259    | 47.9113  | AAL95313.1  LSU ribosomal protein L21P              |                         |    |    |   |   |   |   |
|         |                        |                      |          |          | 11   | 49  | 11.0000    | 68.5221  |                                                     |                         |    |    |   |   |   |   |
| FN1119  | -2.497                 | 12.350               | 1.089e-5 | 6.706e-6 | 16   | 142 | 20.8259    | 183.8758 | AAL95315.1  LSU ribosomal protein L27P              |                         |    |    |   |   |   |   |
|         |                        |                      |          |          | 40   | 114 | 40.0000    | 159.4187 |                                                     |                         |    |    |   |   |   |   |
| FN1120  | 0.750                  | 15.433               | 8.342e-4 | 2.394e-3 | 207  | 109 | 269.4346   | 141.1441 | AAL95316.1  Phosphoenolpyruvate carboxykinase (ATP) |                         |    |    |   |   |   |   |
|         |                        |                      |          |          | 276  | 131 | 276.0000   | 183.1917 |                                                     |                         |    |    |   |   |   |   |
| FN1121  | -0.163                 | 12.497               | 2.032e-2 | 1.042e-1 | 52   | 67  | 67.6841    | 86.7583  | AAL95317.1  hypothetical cytosolic protein          |                         |    |    |   |   |   |   |
|         |                        |                      |          |          | 76   | 53  | 76.0000    | 74.1157  |                                                     |                         |    |    |   |   |   |   |
| FN1122  | -1.834                 | 14.132               | 2.495e-4 | 5.036e-4 | 66   | 219 | 85.9067    | 283.5832 | AAL95318.1  Long-chain-fatty-acid--CoA ligase       |                         |    |    |   |   |   |   |
|         |                        |                      |          |          | 56   | 159 | 56.0000    | 222.3471 |                                                     |                         |    |    |   |   |   |   |
| FN1123  | -1.550                 | 8.094                | 1.478e-3 | 4.775e-3 | 11   | 21  | 14.3178    | 27.1929  | AAL95319.1  Thioredoxin-like protein                |                         |    |    |   |   |   |   |
|         |                        |                      |          |          | 5    | 21  | 5.0000     | 29.3666  |                                                     |                         |    |    |   |   |   |   |

Show detected proteins only  
 Show all proteins  
 Filter by category:

Proteins found: 1358

Test Cutoff

| Signif | Direction | Applies To   |
|--------|-----------|--------------|
| yes    | +         | ratios, bars |
| no     | n/a       | bars         |
| yes    | -         | ratios, bars |
| yes    | +         | p-, q-Values |
| yes    | -         |              |

Fn Summary Table

FnPg vs Fn

FnSg vs Fn

FnPgSg vs Fn

FnPgSg vs FnPg

FnSg vs FnPg

FnPgSg vs FnSg

Fn Coverage

| Protein | FnSg vs Fn             |                      |          |          | Raw  |     | Normalized |          | Description                                                    | Log <sub>2</sub> Ratios |    |    |   |   |
|---------|------------------------|----------------------|----------|----------|------|-----|------------|----------|----------------------------------------------------------------|-------------------------|----|----|---|---|
|         | Log <sub>2</sub> Ratio | Log <sub>2</sub> Sum | q-Value  | p-Value  | FnSg | Fn  | FnSg       | Fn       |                                                                | -6                      | -4 | -2 | 0 | 2 |
| FN1124  | -0.264                 | 17.404               | 3.451e-5 | 3.499e-5 | 286  | 356 | 372.2623   | 460.9845 | AAL95320.1  Outer membrane porin F                             |                         |    |    |   |   |
|         |                        |                      |          |          | 388  | 323 | 388.0000   | 451.6863 |                                                                |                         |    |    |   |   |
| FN1125  | 1.202                  | 11.928               | 1.85e-3  | 6.205e-3 | 84   | 29  | 109.3358   | 37.5521  | AAL95321.1  LemA protein                                       |                         |    |    |   |   |
|         |                        |                      |          |          | 80   | 32  | 80.0000    | 44.7491  |                                                                |                         |    |    |   |   |
| FN1127  | 0.590                  | 11.548               | 8.464e-4 | 2.436e-3 | 54   | 30  | 70.2873    | 38.8470  | AAL95323.1  Hypothetical membrane-spanning protein             |                         |    |    |   |   |
|         |                        |                      |          |          | 64   | 36  | 64.0000    | 50.3427  |                                                                |                         |    |    |   |   |
| FN1128  | -0.399                 | 15.526               | 2.826e-4 | 5.924e-4 | 140  | 193 | 182.2263   | 249.9157 | AAL95324.1  Acylamino-acid-releasing enzyme                    |                         |    |    |   |   |
|         |                        |                      |          |          | 196  | 178 | 196.0000   | 248.9169 |                                                                |                         |    |    |   |   |
| FN1129  | -1.502                 | 7.539                | 2.65e-4  | 5.444e-4 | 4    | 16  | 5.2065     | 20.7184  | AAL95325.1  Chromosome partition protein smc                   |                         |    |    |   |   |
|         |                        |                      |          |          | 11   | 18  | 11.0000    | 25.1714  |                                                                |                         |    |    |   |   |
| FN1130  | -0.550                 | 7.469                |          |          |      | 13  |            | 16.8337  | AAL95326.1  Tetraacyldisaccharide 4'-kinase                    |                         |    |    |   |   |
|         |                        |                      |          |          | 11   | 11  | 11.0000    | 15.3825  |                                                                |                         |    |    |   |   |
| FN1131  | -0.484                 | 6.098                |          |          |      |     |            |          | AAL95327.1  Hypothetical protein                               |                         |    |    |   |   |
|         |                        |                      |          |          | 7    | 7   | 7.0000     | 9.7889   |                                                                |                         |    |    |   |   |
| FN1133  | 0.040                  | 9.875                | 1.23e-1  | 7.452e-1 | 27   | 24  | 35.1436    | 31.0776  | AAL95329.1  N-acetylglucosamine-6-phosphate deacetylase        |                         |    |    |   |   |
|         |                        |                      |          |          | 27   | 21  | 27.0000    | 29.3666  |                                                                |                         |    |    |   |   |
| FN1134  | -2.614                 | 8.614                |          |          |      | 40  |            | 51.7960  | AAL95330.1  Hypothetical cytosolic protein                     |                         |    |    |   |   |
|         |                        |                      |          |          | 8    | 33  | 8.0000     | 46.1475  |                                                                |                         |    |    |   |   |
| FN1135  | -0.530                 | 14.510               | 1.273e-3 | 3.987e-3 | 107  | 142 | 139.2730   | 183.8758 | AAL95331.1  Phosphonates-binding protein                       |                         |    |    |   |   |
|         |                        |                      |          |          | 115  | 131 | 115.0000   | 183.1917 |                                                                |                         |    |    |   |   |
| FN1136  | 1.407                  | 8.072                | 9.993e-4 | 2.976e-3 | 18   | 8   | 23.4291    | 10.3592  | AAL95332.1  Phosphonates transport ATP-binding protein phnC    |                         |    |    |   |   |
|         |                        |                      |          |          | 30   | 7   | 30.0000    | 9.7889   |                                                                |                         |    |    |   |   |
| FN1138  | -0.681                 | 18.642               | 6.319e-3 | 2.716e-2 | 491  | 644 | 639.0937   | 833.9158 | AAL95334.1  Hypothetical cytosolic protein                     |                         |    |    |   |   |
|         |                        |                      |          |          | 371  | 562 | 371.0000   | 785.9063 |                                                                |                         |    |    |   |   |
| FN1139  | 1.010                  | 13.601               | 1.441e-3 | 4.628e-3 | 107  | 63  | 139.2730   | 81.5787  | AAL95335.1  Activator of (R)-2-hydroxyglutaryl-CoA dehydratase |                         |    |    |   |   |
|         |                        |                      |          |          | 177  | 54  | 177.0000   | 75.5141  |                                                                |                         |    |    |   |   |
| FN1140  | 1.120                  | 7.800                | 2.05e-2  | 1.052e-1 | 10   | 7   | 13.0162    | 9.0643   | AAL95336.1  hypothetical protein                               |                         |    |    |   |   |
|         |                        |                      |          |          | 31   | 8   | 31.0000    | 11.1873  |                                                                |                         |    |    |   |   |
| FN1142  | -1.166                 | 6.612                | 3.314e-4 | 7.316e-4 | 4    | 11  | 5.2065     | 14.2439  | AAL95338.1  Oxygen-independent coproporphyrinogen III oxidase  |                         |    |    |   |   |
|         |                        |                      |          |          | 8    | 11  | 8.0000     | 15.3825  |                                                                |                         |    |    |   |   |
| FN1143  | 1.365                  | 14.666               | 4.372e-3 | 1.777e-2 | 244  | 72  | 317.5944   | 93.2328  | AAL95339.1  Glucosamine-6-phosphate isomerase                  |                         |    |    |   |   |
|         |                        |                      |          |          | 200  | 77  | 200.0000   | 107.6775 |                                                                |                         |    |    |   |   |

Show detected proteins only  
 Show all proteins  
 Filter by category:

Proteins found: 1358

Enter (or paste) list of ORFs

Find ORFs

Test Cutoff

q-Value p-Value

.005

| Signif | Direction | Applies To   |
|--------|-----------|--------------|
| yes    | +         | ratios, bars |
| no     | n/a       | bars         |
| yes    | -         | ratios, bars |
| yes    | +         | p-, q-Values |
| yes    | -         | p-, q-Values |

Dot Plots Dot Plots

Fn Summary Table FnPg vs Fn FnSg vs Fn FnPgSg vs Fn FnPgSg vs FnPg FnSg vs FnPg FnPgSg vs FnSg Fn Coverage

| Protein | FnSg vs Fn             |                      |          |          | Raw  |     | Normalized |          | Description                                                    | Log <sub>2</sub> Ratios |    |    |   |   |   |   |
|---------|------------------------|----------------------|----------|----------|------|-----|------------|----------|----------------------------------------------------------------|-------------------------|----|----|---|---|---|---|
|         | Log <sub>2</sub> Ratio | Log <sub>2</sub> Sum | q-Value  | p-Value  | FnSg | Fn  | FnSg       | Fn       |                                                                | -6                      | -4 | -2 | 0 | 2 | 4 | 6 |
| FN1144  | -1.023                 | 15.026               | 1.15e-5  | 7.354e-6 | 107  | 210 | 139.2730   | 271.9291 | AAL95340.1  Hypothetical Exported Protein                      |                         |    |    |   |   |   |   |
|         |                        |                      |          |          | 117  | 178 | 117.0000   | 248.9169 |                                                                |                         |    |    |   |   |   |   |
| FN1145  | -0.261                 | 8.956                | 8.845e-2 | 5.156e-1 | 9    | 15  | 11.7145    | 19.4235  | AAL95341.1  Oligoendopeptidase F                               |                         |    |    |   |   |   |   |
|         |                        |                      |          |          | 29   | 21  | 29.0000    | 29.3666  |                                                                |                         |    |    |   |   |   |   |
| FN1146  |                        |                      |          |          |      | 24  |            | 31.0776  | AAL95342.1  Hypothetical exported 24-amino acid repeat protein |                         |    |    |   |   |   |   |
|         |                        |                      |          |          |      | 20  |            | 27.9682  |                                                                |                         |    |    |   |   |   |   |
| FN1147  |                        |                      |          |          |      | 20  |            | 25.8980  | AAL95343.1  Hypothetical protein                               |                         |    |    |   |   |   |   |
|         |                        |                      |          |          |      | 17  |            | 23.7730  |                                                                |                         |    |    |   |   |   |   |
| FN1148  | 0.232                  | 11.418               | 5.646e-3 | 2.379e-2 | 41   | 40  | 53.3663    | 51.7960  | AAL95344.1  Serine/threonine sodium symporter                  |                         |    |    |   |   |   |   |
|         |                        |                      |          |          | 60   | 32  | 60.0000    | 44.7491  |                                                                |                         |    |    |   |   |   |   |
| FN1149  | -0.203                 | 8.048                | 2.973e-3 | 1.11e-2  | 11   | 14  | 14.3178    | 18.1286  | AAL95345.1  ATP-dependent nuclease subunit A                   |                         |    |    |   |   |   |   |
|         |                        |                      |          |          | 16   | 12  | 16.0000    | 16.7809  |                                                                |                         |    |    |   |   |   |   |
| FN1150  | -0.484                 | 6.098                |          |          |      |     |            |          | AAL95346.1  unknown                                            |                         |    |    |   |   |   |   |
|         |                        |                      |          |          | 7    | 7   | 7.0000     | 9.7889   |                                                                |                         |    |    |   |   |   |   |
| FN1152  | -0.662                 | 13.990               | 9.151e-5 | 1.399e-4 | 79   | 128 | 102.8277   | 165.7472 | AAL95348.1  Aspartate aminotransferase                         |                         |    |    |   |   |   |   |
|         |                        |                      |          |          | 100  | 111 | 100.0000   | 155.2235 |                                                                |                         |    |    |   |   |   |   |
| FN1153  |                        |                      |          |          |      | 36  |            | 46.6164  | AAL95349.1  Hypothetical protein                               |                         |    |    |   |   |   |   |
|         |                        |                      |          |          |      | 26  |            | 36.3587  |                                                                |                         |    |    |   |   |   |   |
| FN1154  | 0.060                  | 6.643                |          |          | 8    |     | 10.4129    |          | AAL95350.1  Ribonuclease BN                                    |                         |    |    |   |   |   |   |
|         |                        |                      |          |          | 10   | 7   | 10.0000    | 9.7889   |                                                                |                         |    |    |   |   |   |   |
| FN1155  | -1.457                 | 5.766                | 5.269e-3 | 2.197e-2 | 3    | 7   | 3.9048     | 9.0643   | AAL95351.1  Cell division protein ftsI                         |                         |    |    |   |   |   |   |
|         |                        |                      |          |          | 5    | 11  | 5.0000     | 15.3825  |                                                                |                         |    |    |   |   |   |   |
| FN1156  |                        |                      |          |          | 10   |     | 13.0162    |          | AAL95352.1  Primosomal protein N'                              |                         |    |    |   |   |   |   |
|         |                        |                      |          |          | 5    |     | 5.0000     |          |                                                                |                         |    |    |   |   |   |   |
| FN1157  |                        |                      |          |          |      | 7   |            | 9.0643   | AAL95353.1  Polypeptide deformylase                            |                         |    |    |   |   |   |   |
|         |                        |                      |          |          |      | 7   |            | 9.7889   |                                                                |                         |    |    |   |   |   |   |
| FN1159  | 0.801                  | 14.088               | 3.377e-4 | 7.494e-4 | 137  | 68  | 178.3215   | 88.0532  | AAL95355.1  Fructose-1,6-bisphosphatase                        |                         |    |    |   |   |   |   |
|         |                        |                      |          |          | 170  | 80  | 170.0000   | 111.8728 |                                                                |                         |    |    |   |   |   |   |
| FN1160  | -0.124                 | 6.144                | 7.389e-2 | 4.24e-1  | 7    | 6   | 9.1113     | 7.7694   | AAL95356.1  SWF/SNF family helicase                            |                         |    |    |   |   |   |   |
|         |                        |                      |          |          | 7    | 7   | 7.0000     | 9.7889   |                                                                |                         |    |    |   |   |   |   |
| FN1161  | -0.986                 | 6.896                | 3.008e-3 | 1.126e-2 | 5    | 14  | 6.5081     | 18.1286  | AAL95357.1  Glutamate racemase                                 |                         |    |    |   |   |   |   |
|         |                        |                      |          |          | 9    | 9   | 9.0000     | 12.5857  |                                                                |                         |    |    |   |   |   |   |

Show detected proteins only  
 Show all proteins  
 Filter by category:

Proteins found: 1358

Test Cutoff

| Signif | Direction | Applies To   |
|--------|-----------|--------------|
| yes    | +         | ratios, bars |
| no     | n/a       | bars         |
| yes    | -         | ratios, bars |
| yes    | +         | p-, q-Values |
| yes    | -         |              |

Fn Summary Table

FnPg vs Fn

FnSg vs Fn

FnPgSg vs Fn

FnPgSg vs FnPg

FnSg vs FnPg

FnPgSg vs FnSg

Fn Coverage

| Protein | FnSg vs Fn             |                      |          |          | Raw  |      | Normalized |           | Description                                                    | Log <sub>2</sub> Ratios |    |    |   |   |   |   |
|---------|------------------------|----------------------|----------|----------|------|------|------------|-----------|----------------------------------------------------------------|-------------------------|----|----|---|---|---|---|
|         | Log <sub>2</sub> Ratio | Log <sub>2</sub> Sum | q-Value  | p-Value  | FnSg | Fn   | FnSg       | Fn        |                                                                | -6                      | -4 | -2 | 0 | 2 | 4 | 6 |
| FN1162  | 0.121                  | 5.732                |          |          | 4    |      | 5.2065     |           | AAL95358.1  Hydroxyacylglutathione hydrolase                   |                         |    |    |   |   |   |   |
|         |                        |                      |          |          | 10   | 5    | 10.0000    | 6.9920    |                                                                |                         |    |    |   |   |   |   |
| FN1163  | -0.499                 | 11.635               | 1.334e-2 | 6.521e-2 | 46   | 56   | 59.8744    | 72.5144   | AAL95359.1  Thioredoxin reductase                              |                         |    |    |   |   |   |   |
|         |                        |                      |          |          | 35   | 44   | 35.0000    | 61.5300   |                                                                |                         |    |    |   |   |   |   |
| FN1164  | -0.764                 | 8.088                | 5.827e-4 | 1.496e-3 | 11   | 17   | 14.3178    | 22.0133   | AAL95360.1  Glucokinase                                        |                         |    |    |   |   |   |   |
|         |                        |                      |          |          | 11   | 15   | 11.0000    | 20.9761   |                                                                |                         |    |    |   |   |   |   |
| FN1165  | 0.138                  | 24.291               | 6.285e-2 | 3.564e-1 | 4182 | 3391 | 5443.3605  | 4391.0067 | AAL95361.1  D-galactose-binding protein                        |                         |    |    |   |   |   |   |
|         |                        |                      |          |          | 4062 | 3036 | 4062.0000  | 4245.5719 |                                                                |                         |    |    |   |   |   |   |
| FN1166  | -0.107                 | 15.858               | 4.275e-2 | 2.353e-1 | 178  | 179  | 231.6877   | 231.7871  | AAL95362.1  Galactoside transport ATP-binding protein mgIA     |                         |    |    |   |   |   |   |
|         |                        |                      |          |          | 238  | 196  | 238.0000   | 274.0883  |                                                                |                         |    |    |   |   |   |   |
| FN1167  | -1.960                 | 9.059                | 1.49e-2  | 7.405e-2 | 8    | 52   | 10.4129    | 67.3348   | AAL95363.1  Galactoside transport system permease protein mgIC |                         |    |    |   |   |   |   |
|         |                        |                      |          |          | 13   | 17   | 13.0000    | 23.7730   |                                                                |                         |    |    |   |   |   |   |
| FN1169  | -0.078                 | 17.277               | 1.066e-1 | 6.339e-1 | 245  | 330  | 318.8961   | 427.3171  | AAL95365.1  L-lactate dehydrogenase                            |                         |    |    |   |   |   |   |
|         |                        |                      |          |          | 457  | 280  | 457.0000   | 391.5547  |                                                                |                         |    |    |   |   |   |   |
| FN1170  | 0.364                  | 25.271               | 8.773e-6 | 4.768e-6 | 5624 | 4375 | 7320.2915  | 5665.1886 | AAL95366.1  Pyruvate-flavodoxin oxidoreductase                 |                         |    |    |   |   |   |   |
|         |                        |                      |          |          | 7117 | 3972 | 7117.0000  | 5554.4834 |                                                                |                         |    |    |   |   |   |   |
| FN1171  | -0.013                 | 19.843               | 1.435e-1 | 8.903e-1 | 673  | 793  | 875.9879   | 1026.8559 | AAL95367.1  Acetate kinase                                     |                         |    |    |   |   |   |   |
|         |                        |                      |          |          | 1055 | 659  | 1055.0000  | 921.5520  |                                                                |                         |    |    |   |   |   |   |
| FN1172  | -0.600                 | 18.793               | 4.171e-5 | 4.682e-5 | 397  | 627  | 516.7418   | 811.9025  | AAL95368.1  Phosphate acetyltransferase                        |                         |    |    |   |   |   |   |
|         |                        |                      |          |          | 578  | 606  | 578.0000   | 847.4363  |                                                                |                         |    |    |   |   |   |   |
| FN1179  | 0.101                  | 5.069                |          |          |      |      |            |           | AAL95375.1  ATP-dependent RNA helicase                         |                         |    |    |   |   |   |   |
|         |                        |                      |          |          | 6    | 4    | 6.0000     | 5.5936    |                                                                |                         |    |    |   |   |   |   |
| FN1180  | -0.700                 | 6.314                |          |          |      | 10   |            | 12.9490   | AAL95376.1  Hypothetical protein                               |                         |    |    |   |   |   |   |
|         |                        |                      |          |          | 7    | 7    | 7.0000     | 9.7889    |                                                                |                         |    |    |   |   |   |   |
| FN1181  | -0.991                 | 12.938               | 1.55e-4  | 2.816e-4 | 42   | 99   | 54.6679    | 128.1951  | AAL95377.1  unknown                                            |                         |    |    |   |   |   |   |
|         |                        |                      |          |          | 71   | 87   | 71.0000    | 121.6616  |                                                                |                         |    |    |   |   |   |   |
| FN1182  | -0.935                 | 6.105                |          |          |      | 8    |            | 10.3592   | AAL95378.1  Hypothetical protein                               |                         |    |    |   |   |   |   |
|         |                        |                      |          |          | 6    | 9    | 6.0000     | 12.5857   |                                                                |                         |    |    |   |   |   |   |
| FN1183  | 0.873                  | 6.883                | 1.428e-2 | 7.06e-2  | 8    | 7    | 10.4129    | 9.0643    | AAL95379.1  Hypothetical cytosolic protein                     |                         |    |    |   |   |   |   |
|         |                        |                      |          |          | 19   | 5    | 19.0000    | 6.9920    |                                                                |                         |    |    |   |   |   |   |
| FN1185  | -0.111                 | 10.095               | 5.219e-2 | 2.924e-1 | 22   | 25   | 28.6356    | 32.3725   | AAL95381.1  SIR2 family protein                                |                         |    |    |   |   |   |   |
|         |                        |                      |          |          | 35   | 26   | 35.0000    | 36.3587   |                                                                |                         |    |    |   |   |   |   |

Show detected proteins only  
 Show all proteins  
 Filter by category:

Proteins found: 1358

Enter (or paste) list of ORFs

Find ORFs

Test Cutoff

q-Value .005

p-Value

| Signif | Direction | Applies To   |
|--------|-----------|--------------|
| yes    | +         | ratios, bars |
| no     | n/a       | bars         |
| yes    | -         | ratios, bars |
| yes    | +         | p-, q-Values |
| yes    | -         |              |

Dot Plots Dot Plots

Fn Summary Table FnPg vs Fn FnSg vs Fn FnPgSg vs Fn FnPgSg vs FnPg FnSg vs FnPg FnPgSg vs FnSg Fn Coverage

| Protein | FnSg vs Fn             |                      |          |          | Raw  |     |          |          | Normalized                                       |    |      |    | Description | Log <sub>2</sub> Ratios |    |    |   |   |   |   |
|---------|------------------------|----------------------|----------|----------|------|-----|----------|----------|--------------------------------------------------|----|------|----|-------------|-------------------------|----|----|---|---|---|---|
|         | Log <sub>2</sub> Ratio | Log <sub>2</sub> Sum | q-Value  | p-Value  | FnSg | Fn  | FnSg     | Fn       | FnSg                                             | Fn | FnSg | Fn |             | -6                      | -4 | -2 | 0 | 2 | 4 | 6 |
| FN1186  | 4.461                  | 12.950               | 1.95e-5  | 1.59e-5  | 308  | 12  | 400.8979 | 15.5388  | AAL95382.1  Amidohydrolase                       |    |      |    |             |                         |    |    |   |   |   |   |
|         |                        |                      |          |          | 434  | 16  | 434.0000 | 22.3746  |                                                  |    |      |    |             |                         |    |    |   |   |   |   |
| FN1187  |                        |                      |          |          | 85   |     | 110.6374 |          | AAL95383.1  Amino acid-binding protein           |    |      |    |             |                         |    |    |   |   |   |   |
|         |                        |                      |          |          | 61   |     | 61.0000  |          |                                                  |    |      |    |             |                         |    |    |   |   |   |   |
| FN1188  | 0.226                  | 13.192               | 1.158e-2 | 5.527e-2 | 87   | 69  | 113.2406 | 89.3481  | AAL95384.1  Hypothetical protein                 |    |      |    |             |                         |    |    |   |   |   |   |
|         |                        |                      |          |          | 96   | 64  | 96.0000  | 89.4982  |                                                  |    |      |    |             |                         |    |    |   |   |   |   |
| FN1189  | -0.599                 | 12.549               | 5.336e-3 | 2.229e-2 | 59   | 77  | 76.7954  | 99.7073  | AAL95385.1  Hypothetical protein                 |    |      |    |             |                         |    |    |   |   |   |   |
|         |                        |                      |          |          | 49   | 65  | 49.0000  | 90.8966  |                                                  |    |      |    |             |                         |    |    |   |   |   |   |
| FN1190  | 0.102                  | 14.748               | 2.297e-3 | 8.066e-3 | 135  | 121 | 175.7182 | 156.6829 | AAL95386.1  Probable cadmium-transporting ATPase |    |      |    |             |                         |    |    |   |   |   |   |
|         |                        |                      |          |          | 168  | 117 | 168.0000 | 163.6139 |                                                  |    |      |    |             |                         |    |    |   |   |   |   |
| FN1191  | 1.230                  | 12.311               | 5.734e-3 | 2.423e-2 | 104  | 33  | 135.3681 | 42.7317  | AAL95387.1  unknown                              |    |      |    |             |                         |    |    |   |   |   |   |
|         |                        |                      |          |          | 83   | 36  | 83.0000  | 50.3427  |                                                  |    |      |    |             |                         |    |    |   |   |   |   |
| FN1192  | 0.877                  | 17.961               | 2.91e-3  | 1.08e-2  | 451  | 298 | 587.0291 | 385.8803 | AAL95388.1  unknown                              |    |      |    |             |                         |    |    |   |   |   |   |
|         |                        |                      |          |          | 782  | 257 | 782.0000 | 359.3913 |                                                  |    |      |    |             |                         |    |    |   |   |   |   |
| FN1198  | 1.280                  | 10.701               | 1.881e-5 | 1.503e-5 | 47   | 21  | 61.1760  | 27.1929  | AAL95394.1  Transporter                          |    |      |    |             |                         |    |    |   |   |   |   |
|         |                        |                      |          |          | 66   | 18  | 66.0000  | 25.1714  |                                                  |    |      |    |             |                         |    |    |   |   |   |   |
| FN1200  |                        |                      |          |          | 253  |     | 329.3090 |          | AAL95396.1  Hypothetical protein                 |    |      |    |             |                         |    |    |   |   |   |   |
|         |                        |                      |          |          | 252  |     | 252.0000 |          |                                                  |    |      |    |             |                         |    |    |   |   |   |   |
| FN1201  |                        |                      |          |          | 7    |     | 7.0000   |          | AAL95397.1  unknown                              |    |      |    |             |                         |    |    |   |   |   |   |
|         |                        |                      |          |          |      |     |          |          |                                                  |    |      |    |             |                         |    |    |   |   |   |   |
| FN1202  | 1.295                  | 8.041                |          |          | 26   | 8   | 33.8420  | 10.3592  | AAL95398.1  NH(3)-dependent NAD(+) synthetase    |    |      |    |             |                         |    |    |   |   |   |   |
|         |                        |                      |          |          | 17   |     | 17.0000  |          |                                                  |    |      |    |             |                         |    |    |   |   |   |   |
| FN1203  | -0.412                 | 7.199                |          |          | 10   |     | 13.0162  |          | AAL95399.1  GTP-binding protein                  |    |      |    |             |                         |    |    |   |   |   |   |
|         |                        |                      |          |          | 8    | 10  | 8.0000   | 13.9841  |                                                  |    |      |    |             |                         |    |    |   |   |   |   |
| FN1204  | 0.512                  | 7.398                | 1.83e-2  | 9.29e-2  | 10   | 6   | 13.0162  | 7.7694   | AAL95400.1  Methyltransferase                    |    |      |    |             |                         |    |    |   |   |   |   |
|         |                        |                      |          |          | 18   | 10  | 18.0000  | 13.9841  |                                                  |    |      |    |             |                         |    |    |   |   |   |   |
| FN1205  | -0.761                 | 12.337               | 9.387e-3 | 4.337e-2 | 58   | 69  | 75.4938  | 89.3481  | AAL95401.1  Protease                             |    |      |    |             |                         |    |    |   |   |   |   |
|         |                        |                      |          |          | 35   | 70  | 35.0000  | 97.8887  |                                                  |    |      |    |             |                         |    |    |   |   |   |   |
| FN1206  |                        |                      |          |          |      | 8   |          | 11.1873  | AAL95402.1  Hemolysin                            |    |      |    |             |                         |    |    |   |   |   |   |
|         |                        |                      |          |          |      |     |          |          |                                                  |    |      |    |             |                         |    |    |   |   |   |   |
| FN1208  | 0.580                  | 7.594                |          |          |      | 10  |          | 12.9490  | AAL95404.1  1-deoxyxylulose-5-phosphate synthase |    |      |    |             |                         |    |    |   |   |   |   |
|         |                        |                      |          |          | 17   | 7   | 17.0000  | 9.7889   |                                                  |    |      |    |             |                         |    |    |   |   |   |   |

Show detected proteins only  
 Show all proteins  
 Filter by category:

Proteins found: 1358

Test Cutoff

| Signif      | Direction | Applies To |
|-------------|-----------|------------|
| red         | yes       | +          |
| yellow      | no        | n/a        |
| green       | yes       | -          |
| pink        | yes       | +          |
| light green | yes       | -          |

Applies To: ratios, bars; ratios, bars; ratios, bars; p-, q-Values



Fn Summary Table FnPg vs Fn FnSg vs Fn FnPgSg vs Fn FnPgSg vs FnPg FnSg vs FnPg FnPgSg vs FnSg Fn Coverage

| Protein | FnSg vs Fn             |                      |          |          | Raw  |     | Normalized |          | Description                                                                    | Log <sub>2</sub> Ratios |    |    |   |   |   |   |
|---------|------------------------|----------------------|----------|----------|------|-----|------------|----------|--------------------------------------------------------------------------------|-------------------------|----|----|---|---|---|---|
|         | Log <sub>2</sub> Ratio | Log <sub>2</sub> Sum | q-Value  | p-Value  | FnSg | Fn  | FnSg       | Fn       |                                                                                | -6                      | -4 | -2 | 0 | 2 | 4 | 6 |
| FN1209  | -1.872                 | 10.844               | 2.67e-3  | 9.698e-3 | 16   | 77  | 20.8259    | 99.7073  | AAL95405.1  Hypothetical RNA binding protein                                   |                         |    |    |   |   |   |   |
|         |                        |                      |          |          | 24   | 46  | 24.0000    | 64.3268  |                                                                                |                         |    |    |   |   |   |   |
| FN1210  | -1.032                 | 12.066               | 5.966e-3 | 2.538e-2 | 45   | 55  | 58.5727    | 71.2195  | AAL95406.1  Metal dependent hydrolase                                          |                         |    |    |   |   |   |   |
|         |                        |                      |          |          | 33   | 83  | 33.0000    | 116.0680 |                                                                                |                         |    |    |   |   |   |   |
| FN1211  | -0.699                 | 8.252                | 3.479e-3 | 1.353e-2 | 8    | 16  | 10.4129    | 20.7184  | AAL95407.1  Cell division protein ftsI                                         |                         |    |    |   |   |   |   |
|         |                        |                      |          |          | 17   | 17  | 17.0000    | 23.7730  |                                                                                |                         |    |    |   |   |   |   |
| FN1213  | -0.421                 | 12.327               | 2.328e-3 | 8.199e-3 | 46   | 59  | 59.8744    | 76.3991  | AAL95409.1  Hypothetical protein                                               |                         |    |    |   |   |   |   |
|         |                        |                      |          |          | 64   | 64  | 64.0000    | 89.4982  |                                                                                |                         |    |    |   |   |   |   |
| FN1216  | -0.881                 | 9.049                | 1.107e-2 | 5.249e-2 | 13   | 18  | 16.9210    | 23.3082  | AAL95412.1  RRF2 family protein                                                |                         |    |    |   |   |   |   |
|         |                        |                      |          |          | 17   | 28  | 17.0000    | 39.1555  |                                                                                |                         |    |    |   |   |   |   |
| FN1217  | -0.122                 | 9.171                | 9.118e-2 | 5.332e-1 | 20   | 16  | 26.0323    | 20.7184  | AAL95413.1  Holliday junction DNA helicase ruvB                                |                         |    |    |   |   |   |   |
|         |                        |                      |          |          | 20   | 21  | 20.0000    | 29.3666  |                                                                                |                         |    |    |   |   |   |   |
| FN1218  |                        |                      |          |          | 13   |     | 16.9210    |          | AAL95414.1  unknown                                                            |                         |    |    |   |   |   |   |
|         |                        |                      |          |          | 19   |     | 19.0000    |          |                                                                                |                         |    |    |   |   |   |   |
| FN1219  | 0.075                  | 7.863                | 9.847e-2 | 5.804e-1 | 11   | 10  | 14.3178    | 12.9490  | AAL95415.1  Hypothetical protein                                               |                         |    |    |   |   |   |   |
|         |                        |                      |          |          | 17   | 12  | 17.0000    | 16.7809  |                                                                                |                         |    |    |   |   |   |   |
| FN1220  | 0.134                  | 15.776               | 9.04e-2  | 5.281e-1 | 150  | 183 | 195.2425   | 236.9667 | AAL95416.1  Cysteine synthase                                                  |                         |    |    |   |   |   |   |
|         |                        |                      |          |          | 301  | 154 | 301.0000   | 215.3551 |                                                                                |                         |    |    |   |   |   |   |
| FN1221  | 0.628                  | 9.110                | 1.698e-2 | 8.559e-2 | 28   | 13  | 36.4453    | 16.8337  | AAL95417.1  Hypothetical protein                                               |                         |    |    |   |   |   |   |
|         |                        |                      |          |          | 22   | 15  | 22.0000    | 20.9761  |                                                                                |                         |    |    |   |   |   |   |
| FN1222  | -2.965                 | 7.609                |          |          |      | 29  |            | 37.5521  | AAL95418.1  Hypothetical protein                                               |                         |    |    |   |   |   |   |
|         |                        |                      |          |          | 5    | 29  | 5.0000     | 40.5539  |                                                                                |                         |    |    |   |   |   |   |
| FN1223  | -1.197                 | 10.940               | 1.036e-5 | 6.173e-6 | 25   | 54  | 32.5404    | 69.9246  | AAL95419.1  Oxygen-insensitive NAD(P)H nitroreductase                          |                         |    |    |   |   |   |   |
|         |                        |                      |          |          | 26   | 46  | 26.0000    | 64.3268  |                                                                                |                         |    |    |   |   |   |   |
| FN1224  | -1.022                 | 13.632               | 4.285e-4 | 1.006e-3 | 47   | 113 | 61.1760    | 146.3237 | AAL95420.1  2-dehydro-3-deoxyphosphooctonate aldolase                          |                         |    |    |   |   |   |   |
|         |                        |                      |          |          | 97   | 125 | 97.0000    | 174.8012 |                                                                                |                         |    |    |   |   |   |   |
| FN1225  | -0.427                 | 13.491               | 1.198e-2 | 5.752e-2 | 60   | 82  | 78.0970    | 106.1818 | AAL95421.1  UDP-N-acetylmuramoyl-L-alanyl-D-glutamate--meso-lanthionine ligase |                         |    |    |   |   |   |   |
|         |                        |                      |          |          | 107  | 102 | 107.0000   | 142.6378 |                                                                                |                         |    |    |   |   |   |   |
| FN1226  | 0.365                  | 15.117               | 2.48e-2  | 1.297e-1 | 195  | 127 | 253.8152   | 164.4523 | AAL95422.1  Uracil-DNA glycosylase                                             |                         |    |    |   |   |   |   |
|         |                        |                      |          |          | 174  | 120 | 174.0000   | 167.8092 |                                                                                |                         |    |    |   |   |   |   |
| FN1229  |                        |                      |          |          |      | 5   |            | 6.4745   | AAL95425.1  Hypothetical protein                                               |                         |    |    |   |   |   |   |
|         |                        |                      |          |          |      | 7   |            | 9.7889   |                                                                                |                         |    |    |   |   |   |   |

Show detected proteins only  
 Show all proteins  
 Filter by category:

Proteins found: 1358

Enter (or paste) list of ORFs

Find ORFs

Test Cutoff

q-Value

p-Value

.005

| Signif | Direction | Applies To   |
|--------|-----------|--------------|
| yes    | +         | ratios, bars |
| no     | n/a       | bars         |
| yes    | -         | ratios, bars |
| yes    | +         | p-, q-Values |
| yes    | -         | p-, q-Values |

Dot Plots Dot Plots

Fn Summary Table

FnPg vs Fn

FnSg vs Fn

FnPgSg vs Fn

FnPgSg vs FnPg

FnSg vs FnPg

FnPgSg vs FnSg

Fn Coverage

| Protein | FnSg vs Fn             |                      |          |          | Raw  |     | Normalized |          | Description                                                   | Log <sub>2</sub> Ratios |    |    |   |   |   |   |
|---------|------------------------|----------------------|----------|----------|------|-----|------------|----------|---------------------------------------------------------------|-------------------------|----|----|---|---|---|---|
|         | Log <sub>2</sub> Ratio | Log <sub>2</sub> Sum | q-Value  | p-Value  | FnSg | Fn  | FnSg       | Fn       |                                                               | -6                      | -4 | -2 | 0 | 2 | 4 | 6 |
| FN1230  |                        |                      |          |          |      | 50  |            | 64.7450  | AAL95426.1  Hypothetical cytosolic protein                    |                         |    |    |   |   |   |   |
|         |                        |                      |          |          |      | 43  |            | 60.1316  |                                                               |                         |    |    |   |   |   |   |
| FN1231  | 0.921                  | 19.191               | 1.093e-4 | 1.752e-4 | 788  | 431 | 1025.6739  | 558.1020 | AAL95427.1  Inosine-5'-monophosphate dehydrogenase            |                         |    |    |   |   |   |   |
|         |                        |                      |          |          | 1104 | 405 | 1104.0000  | 566.3559 |                                                               |                         |    |    |   |   |   |   |
| FN1233  | 0.340                  | 4.830                |          |          |      | 3   |            | 3.8847   | AAL95429.1  Putative NAD(P)H oxidoreductase                   |                         |    |    |   |   |   |   |
|         |                        |                      |          |          | 6    | 4   | 6.0000     | 5.5936   |                                                               |                         |    |    |   |   |   |   |
| FN1234  | 0.160                  | 8.625                |          |          |      | 15  |            | 19.4235  | AAL95430.1  Hypothetical protein                              |                         |    |    |   |   |   |   |
|         |                        |                      |          |          | 21   | 13  | 21.0000    | 18.1793  |                                                               |                         |    |    |   |   |   |   |
| FN1235  | 1.768                  | 8.128                |          |          | 29   | 7   | 37.7469    | 9.0643   | AAL95431.1  Ankyrin repeat proteins                           |                         |    |    |   |   |   |   |
|         |                        |                      |          |          | 24   |     | 24.0000    |          |                                                               |                         |    |    |   |   |   |   |
| FN1237  | 2.287                  | 11.853               | 2.375e-4 | 4.73e-4  | 112  | 22  | 145.7811   | 28.4878  | AAL95433.1  Choline kinase                                    |                         |    |    |   |   |   |   |
|         |                        |                      |          |          | 123  | 19  | 123.0000   | 26.5698  |                                                               |                         |    |    |   |   |   |   |
| FN1238  |                        |                      |          |          |      |     |            |          | AAL95434.1  Hypothetical protein                              |                         |    |    |   |   |   |   |
|         |                        |                      |          |          | 4    |     | 4.0000     |          |                                                               |                         |    |    |   |   |   |   |
| FN1240  | -2.598                 | 8.173                | 6.78e-5  | 9.412e-5 | 6    | 30  | 7.8097     | 38.8470  | AAL95436.1  Lipopolysaccharide core biosynthesis protein rfaY |                         |    |    |   |   |   |   |
|         |                        |                      |          |          | 6    | 32  | 6.0000     | 44.7491  |                                                               |                         |    |    |   |   |   |   |
| FN1241  | 0.491                  | 6.482                | 1.888e-2 | 9.616e-2 | 8    | 8   | 10.4129    | 10.3592  | AAL95437.1  polysaccharide biosynthesis protein               |                         |    |    |   |   |   |   |
|         |                        |                      |          |          | 12   | 4   | 12.0000    | 5.5936   |                                                               |                         |    |    |   |   |   |   |
| FN1242  | 1.104                  | 8.315                | 6.253e-5 | 8.35e-5  | 21   | 8   | 27.3339    | 10.3592  | AAL95438.1  Polysaccharide deacetylase                        |                         |    |    |   |   |   |   |
|         |                        |                      |          |          | 25   | 10  | 25.0000    | 13.9841  |                                                               |                         |    |    |   |   |   |   |
| FN1243  | -0.234                 | 7.523                | 3.163e-2 | 1.697e-1 | 10   | 13  | 13.0162    | 16.8337  | AAL95439.1  Glycosyl transferase                              |                         |    |    |   |   |   |   |
|         |                        |                      |          |          | 12   | 9   | 12.0000    | 12.5857  |                                                               |                         |    |    |   |   |   |   |
| FN1244  | 0.771                  | 8.692                | 3.719e-3 | 1.473e-2 | 17   | 10  | 22.1275    | 12.9490  | AAL95440.1  Polysaccharide deacetylase                        |                         |    |    |   |   |   |   |
|         |                        |                      |          |          | 31   | 13  | 31.0000    | 18.1793  |                                                               |                         |    |    |   |   |   |   |
| FN1245  | -1.567                 | 7.344                | 7.032e-3 | 3.087e-2 | 6    | 22  | 7.8097     | 28.4878  | AAL95441.1  Glycosyl transferase                              |                         |    |    |   |   |   |   |
|         |                        |                      |          |          | 7    | 11  | 7.0000     | 15.3825  |                                                               |                         |    |    |   |   |   |   |
| FN1246  | -0.141                 | 8.601                | 7.953e-2 | 4.591e-1 | 15   | 19  | 19.5242    | 24.6031  | AAL95442.1  Lipooligosaccharide cholinephosphotransferase     |                         |    |    |   |   |   |   |
|         |                        |                      |          |          | 18   | 12  | 18.0000    | 16.7809  |                                                               |                         |    |    |   |   |   |   |
| FN1247  | 0.349                  | 9.857                | 5.002e-2 | 2.792e-1 | 19   | 19  | 24.7307    | 24.6031  | AAL95443.1  LOS biosynthesis enzyme LBGB                      |                         |    |    |   |   |   |   |
|         |                        |                      |          |          | 44   | 21  | 44.0000    | 29.3666  |                                                               |                         |    |    |   |   |   |   |
| FN1248  |                        |                      |          |          |      | 5   |            | 6.4745   | AAL95444.1  Hypothetical cytosolic protein                    |                         |    |    |   |   |   |   |
|         |                        |                      |          |          |      |     |            |          |                                                               |                         |    |    |   |   |   |   |

Show detected proteins only  
 Show all proteins  
 Filter by category:

Proteins found: 1358

Test Cutoff

| Signif | Direction | Applies To   |
|--------|-----------|--------------|
| yes    | +         | ratios, bars |
| no     | n/a       | bars         |
| yes    | -         | ratios, bars |
| yes    | +         | p-, q-Values |
| yes    | -         |              |

Fn Summary Table

FnPg vs Fn

FnSg vs Fn

FnPgSg vs Fn

FnPgSg vs FnPg

FnSg vs FnPg

FnPgSg vs FnSg

Fn Coverage

| Protein | FnSg vs Fn             |                      |          |          | Raw  |      | Normalized |           | Description                                              | Log <sub>2</sub> Ratios |    |    |   |   |   |   |
|---------|------------------------|----------------------|----------|----------|------|------|------------|-----------|----------------------------------------------------------|-------------------------|----|----|---|---|---|---|
|         | Log <sub>2</sub> Ratio | Log <sub>2</sub> Sum | q-Value  | p-Value  | FnSg | Fn   | FnSg       | Fn        |                                                          | -6                      | -4 | -2 | 0 | 2 | 4 | 6 |
| FN1250  | -1.336                 | 10.150               | 4.866e-4 | 1.184e-3 | 18   | 46   | 23.4291    | 59.5654   | AAL95446.1  Guanine-hypoxanthine permease                |                         |    |    |   |   |   |   |
|         |                        |                      |          |          | 19   | 34   | 19.0000    | 47.5459   |                                                          |                         |    |    |   |   |   |   |
| FN1251  | 0.025                  | 6.884                | 1.53e-1  | 9.601e-1 | 13   | 8    | 16.9210    | 10.3592   | AAL95447.1  High-affinity iron permease                  |                         |    |    |   |   |   |   |
|         |                        |                      |          |          | 5    | 8    | 5.0000     | 11.1873   |                                                          |                         |    |    |   |   |   |   |
| FN1252  | -1.187                 | 18.460               | 1.159e-4 | 1.892e-4 | 361  | 638  | 469.8836   | 826.1464  | AAL95448.1  34 kDa membrane antigen precursor            |                         |    |    |   |   |   |   |
|         |                        |                      |          |          | 326  | 705  | 326.0000   | 985.8788  |                                                          |                         |    |    |   |   |   |   |
| FN1253  | -0.732                 | 16.347               | 1.505e-4 | 2.701e-4 | 186  | 268  | 242.1007   | 347.0333  | AAL95449.1  unknown                                      |                         |    |    |   |   |   |   |
|         |                        |                      |          |          | 206  | 284  | 206.0000   | 397.1484  |                                                          |                         |    |    |   |   |   |   |
| FN1254  | -1.036                 | 12.873               | 8.79e-5  | 1.331e-4 | 53   | 103  | 68.9857    | 133.3747  | AAL95450.1  Oxygen-insensitive NAD(P)H nitroreductase    |                         |    |    |   |   |   |   |
|         |                        |                      |          |          | 52   | 82   | 52.0000    | 114.6696  |                                                          |                         |    |    |   |   |   |   |
| FN1255  |                        |                      |          |          |      | 15   |            | 19.4235   | AAL95451.1  NagD protein                                 |                         |    |    |   |   |   |   |
|         |                        |                      |          |          |      | 14   |            | 19.5777   |                                                          |                         |    |    |   |   |   |   |
| FN1256  |                        |                      |          |          |      | 5    |            | 6.4745    | AAL95452.1  C4-dicarboxylate transporter large subunit   |                         |    |    |   |   |   |   |
|         |                        |                      |          |          |      |      |            |           |                                                          |                         |    |    |   |   |   |   |
| FN1258  | -0.557                 | 20.198               | 1.495e-4 | 2.677e-4 | 741  | 1049 | 964.4979   | 1358.3504 | AAL95454.1  C4-dicarboxylate-binding protein             |                         |    |    |   |   |   |   |
|         |                        |                      |          |          | 844  | 931  | 844.0000   | 1301.9194 |                                                          |                         |    |    |   |   |   |   |
| FN1259  |                        |                      |          |          |      |      |            |           | AAL95455.1  hypothetical protein                         |                         |    |    |   |   |   |   |
|         |                        |                      |          |          | 9    |      | 9.0000     |           |                                                          |                         |    |    |   |   |   |   |
| FN1260  |                        |                      |          |          |      | 4    |            | 5.1796    | AAL95456.1  Sensory Transduction Protein Kinase          |                         |    |    |   |   |   |   |
|         |                        |                      |          |          |      |      |            |           |                                                          |                         |    |    |   |   |   |   |
| FN1261  |                        |                      |          |          |      | 4    |            | 5.5936    | AAL95457.1  Two-component response regulator             |                         |    |    |   |   |   |   |
|         |                        |                      |          |          |      |      |            |           |                                                          |                         |    |    |   |   |   |   |
| FN1262  | 1.407                  | 6.796                |          |          | 21   | 5    | 27.3339    | 6.4745    | AAL95458.1  Integral membrane protein                    |                         |    |    |   |   |   |   |
|         |                        |                      |          |          | 7    |      | 7.0000     |           |                                                          |                         |    |    |   |   |   |   |
| FN1263  | -0.159                 | 9.189                | 1.724e-2 | 8.706e-2 | 19   | 20   | 24.7307    | 25.8980   | AAL95459.1  Cobalt chelatase                             |                         |    |    |   |   |   |   |
|         |                        |                      |          |          | 21   | 18   | 21.0000    | 25.1714   |                                                          |                         |    |    |   |   |   |   |
| FN1264  | -0.747                 | 8.802                | 6.873e-3 | 3.003e-2 | 12   | 25   | 15.6194    | 32.3725   | AAL95460.1  Hypothetical protein                         |                         |    |    |   |   |   |   |
|         |                        |                      |          |          | 17   | 16   | 17.0000    | 22.3746   |                                                          |                         |    |    |   |   |   |   |
| FN1265  | -0.208                 | 13.076               | 3.209e-2 | 1.724e-1 | 76   | 83   | 98.9229    | 107.4767  | AAL95461.1  Outer membrane protein                       |                         |    |    |   |   |   |   |
|         |                        |                      |          |          | 74   | 66   | 74.0000    | 92.2950   |                                                          |                         |    |    |   |   |   |   |
| FN1266  | -0.726                 | 14.326               | 1.444e-3 | 4.639e-3 | 99   | 140  | 128.8600   | 181.2860  | AAL95462.1  UTP--glucose-1-phosphate uridylyltransferase |                         |    |    |   |   |   |   |
|         |                        |                      |          |          | 94   | 134  | 94.0000    | 187.3869  |                                                          |                         |    |    |   |   |   |   |

- Show detected proteins only
- Show all proteins

Filter by category:  
GO: amino acid transport

Proteins found:  
1358

Enter (or paste) list of ORFs

Find ORFs

Test

Cutoff

q-Value

p-Value

.005

| Signif | Direction | Applies To   |
|--------|-----------|--------------|
| yes    | +         | ratios, bars |
| no     | n/a       | bars         |
| yes    | -         | ratios, bars |
| yes    | +         | p-, q-Values |
| yes    | -         | p-, q-Values |

Dot Plots Dot Plots

Fn Summary Table

FnPg vs Fn

FnSg vs Fn

FnPgSg vs Fn

FnPgSg vs FnPg

FnSg vs FnPg

FnPgSg vs FnSg

Fn Coverage

| Protein | FnSg vs Fn             |                      |          |          | Raw  |     | Normalized |          | Description                                             | Log <sub>2</sub> Ratios |    |    |   |   |   |   |
|---------|------------------------|----------------------|----------|----------|------|-----|------------|----------|---------------------------------------------------------|-------------------------|----|----|---|---|---|---|
|         | Log <sub>2</sub> Ratio | Log <sub>2</sub> Sum | q-Value  | p-Value  | FnSg | Fn  | FnSg       | Fn       |                                                         | -6                      | -4 | -2 | 0 | 2 | 4 | 6 |
| FN1267  | -0.323                 | 10.440               | 3.336e-2 | 1.8e-1   | 32   | 32  | 41.6517    | 41.4368  | AAL95463.1  Hypothetical protein                        |                         |    |    |   |   |   |   |
|         |                        |                      |          |          | 25   | 30  | 25.0000    | 41.9523  |                                                         |                         |    |    |   |   |   |   |
| FN1268  | -1.071                 | 15.511               | 1.415e-3 | 4.529e-3 | 120  | 272 | 156.1940   | 352.2129 | AAL95464.1  Methionyl-tRNA synthetase                   |                         |    |    |   |   |   |   |
|         |                        |                      |          |          | 142  | 196 | 142.0000   | 274.0883 |                                                         |                         |    |    |   |   |   |   |
| FN1269  | -0.946                 | 7.322                |          |          | 7    | 12  | 9.1113     | 15.5388  | AAL95465.1  Hypothetical lipoprotein                    |                         |    |    |   |   |   |   |
|         |                        |                      |          |          |      | 14  |            | 19.5777  |                                                         |                         |    |    |   |   |   |   |
| FN1270  | -3.588                 | 10.689               |          |          | 9    | 115 | 11.7145    | 148.9135 | AAL95466.1  Hypothetical cytosolic protein              |                         |    |    |   |   |   |   |
|         |                        |                      |          |          |      | 95  |            | 132.8489 |                                                         |                         |    |    |   |   |   |   |
| FN1271  | -0.271                 | 11.721               | 3.333e-2 | 1.799e-1 | 49   | 50  | 63.7792    | 64.7450  | AAL95467.1  Protease IV                                 |                         |    |    |   |   |   |   |
|         |                        |                      |          |          | 42   | 45  | 42.0000    | 62.9284  |                                                         |                         |    |    |   |   |   |   |
| FN1273  | 0.531                  | 11.522               | 2.203e-2 | 1.139e-1 | 51   | 47  | 66.3824    | 60.8603  | AAL95469.1  Outer membrane protein tolC                 |                         |    |    |   |   |   |   |
|         |                        |                      |          |          | 64   | 21  | 64.0000    | 29.3666  |                                                         |                         |    |    |   |   |   |   |
| FN1274  | -1.250                 | 10.223               | 5.095e-4 | 1.258e-3 | 16   | 37  | 20.8259    | 47.9113  | AAL95470.1  Acriflavin resistance protein E             |                         |    |    |   |   |   |   |
|         |                        |                      |          |          | 24   | 42  | 24.0000    | 58.7332  |                                                         |                         |    |    |   |   |   |   |
| FN1275  | -1.572                 | 10.413               | 2.811e-4 | 5.884e-4 | 16   | 53  | 20.8259    | 68.6297  | AAL95471.1  Acriflavin resistance protein B             |                         |    |    |   |   |   |   |
|         |                        |                      |          |          | 22   | 42  | 22.0000    | 58.7332  |                                                         |                         |    |    |   |   |   |   |
| FN1276  |                        |                      |          |          | 13   |     | 16.9210    |          | AAL95472.1  Hypothetical protein                        |                         |    |    |   |   |   |   |
|         |                        |                      |          |          | 22   |     | 22.0000    |          |                                                         |                         |    |    |   |   |   |   |
| FN1277  | 0.267                  | 15.369               | 6.773e-3 | 2.95e-2  | 160  | 133 | 208.2587   | 172.2217 | AAL95473.1  Aminoacyl-histidine dipeptidase             |                         |    |    |   |   |   |   |
|         |                        |                      |          |          | 243  | 145 | 243.0000   | 202.7694 |                                                         |                         |    |    |   |   |   |   |
| FN1278  |                        |                      |          |          |      |     |            |          | AAL95474.1  Acetyltransferase                           |                         |    |    |   |   |   |   |
|         |                        |                      |          |          | 11   |     | 11.0000    |          |                                                         |                         |    |    |   |   |   |   |
| FN1279  | -0.890                 | 12.061               | 1.02e-4  | 1.603e-4 | 40   | 64  | 52.0647    | 82.8736  | AAL95475.1  Zinc metallohydrolase, glyoxalase II family |                         |    |    |   |   |   |   |
|         |                        |                      |          |          | 44   | 68  | 44.0000    | 95.0919  |                                                         |                         |    |    |   |   |   |   |
| FN1280  | 3.038                  | 10.375               | 3.156e-4 | 6.873e-4 | 89   | 11  | 115.8439   | 14.2439  | AAL95476.1  Serine protease, V8 family                  |                         |    |    |   |   |   |   |
|         |                        |                      |          |          | 93   | 8   | 93.0000    | 11.1873  |                                                         |                         |    |    |   |   |   |   |
| FN1281  | 0.629                  | 9.636                | 4.332e-3 | 1.759e-2 | 27   | 21  | 35.1436    | 27.1929  | AAL95477.1  Cysteine protease                           |                         |    |    |   |   |   |   |
|         |                        |                      |          |          | 35   | 13  | 35.0000    | 18.1793  |                                                         |                         |    |    |   |   |   |   |
| FN1282  | 0.250                  | 12.338               | 1.182e-2 | 5.664e-2 | 66   | 49  | 85.9067    | 63.4501  | AAL95478.1  LSU ribosomal protein L17P                  |                         |    |    |   |   |   |   |
|         |                        |                      |          |          | 71   | 49  | 71.0000    | 68.5221  |                                                         |                         |    |    |   |   |   |   |
| FN1283  | 0.423                  | 18.195               | 1.589e-2 | 7.951e-2 | 404  | 383 | 525.8531   | 495.9468 | AAL95479.1  DNA-directed RNA polymerase alpha chain     |                         |    |    |   |   |   |   |
|         |                        |                      |          |          | 743  | 322 | 743.0000   | 450.2879 |                                                         |                         |    |    |   |   |   |   |

Show detected proteins only  
 Show all proteins  
 Filter by category:

Proteins found: 1358

Enter (or paste) list of ORFs

Find ORFs

Test Cutoff

q-Value .005

p-Value

| Signif | Direction | Applies To   |
|--------|-----------|--------------|
| yes    | +         | ratios, bars |
| no     | n/a       | bars         |
| yes    | -         | ratios, bars |
| yes    | +         | p-, q-Values |
| yes    | -         |              |

Dot Plots Dot Plots

Fn Summary Table

FnPg vs Fn

FnSg vs Fn

FnPgSg vs Fn

FnPgSg vs FnPg

FnSg vs FnPg

FnPgSg vs FnSg

Fn Coverage

| Protein       | FnSg vs Fn             |                      |          |          | Raw      |     | Normalized |          | Description                                                          | Log <sub>2</sub> Ratios |                                       |    |   |   |   |   |
|---------------|------------------------|----------------------|----------|----------|----------|-----|------------|----------|----------------------------------------------------------------------|-------------------------|---------------------------------------|----|---|---|---|---|
|               | Log <sub>2</sub> Ratio | Log <sub>2</sub> Sum | q-Value  | p-Value  | FnSg     | Fn  | FnSg       | Fn       |                                                                      | -6                      | -4                                    | -2 | 0 | 2 | 4 | 6 |
|               | <b>FN1284</b>          | -1.208               | 18.516   | 3.448e-7 | 3.598e-8 | 324 | 705        | 421.7238 |                                                                      | 912.9047                | AAL95480.1  SSU ribosomal protein S4P |    |   |   |   |   |
|               |                        |                      |          |          | 384      | 678 | 384.0000   | 948.1218 |                                                                      |                         |                                       |    |   |   |   |   |
| <b>FN1285</b> | -2.246                 | 11.238               | 2.49e-5  | 2.234e-5 | 17       | 80  | 22.1275    | 103.5920 | AAL95481.1  SSU ribosomal protein S11P                               |                         |                                       |    |   |   |   |   |
|               |                        |                      |          |          | 23       | 79  | 23.0000    | 110.4744 |                                                                      |                         |                                       |    |   |   |   |   |
| <b>FN1286</b> | -2.156                 | 15.369               | 1.562e-6 | 3.129e-7 | 66       | 323 | 85.9067    | 418.2528 | AAL95482.1  SSU ribosomal protein S13P                               |                         |                                       |    |   |   |   |   |
|               |                        |                      |          |          | 109      | 322 | 109.0000   | 450.2879 |                                                                      |                         |                                       |    |   |   |   |   |
| <b>FN1287</b> | -2.227                 | 8.844                | 5.401e-5 | 6.771e-5 | 6        | 36  | 7.8097     | 46.6164  | AAL95483.1  Bacterial Protein Translation Initiation Factor 1 (IF-1) |                         |                                       |    |   |   |   |   |
|               |                        |                      |          |          | 12       | 33  | 12.0000    | 46.1475  |                                                                      |                         |                                       |    |   |   |   |   |
| <b>FN1290</b> | -0.935                 | 9.035                | 3.475e-3 | 1.35e-2  | 17       | 23  | 22.1275    | 29.7827  | AAL95486.1  Hypothetical protein                                     |                         |                                       |    |   |   |   |   |
|               |                        |                      |          |          | 11       | 24  | 11.0000    | 33.5618  |                                                                      |                         |                                       |    |   |   |   |   |
| <b>FN1293</b> | -0.864                 | 5.625                |          |          | 4        | 6   | 5.2065     | 7.7694   | AAL95489.1  Hypothetical protein                                     |                         |                                       |    |   |   |   |   |
|               |                        |                      |          |          |          | 8   |            | 11.1873  |                                                                      |                         |                                       |    |   |   |   |   |
| <b>FN1296</b> |                        |                      |          |          |          | 29  |            | 37.5521  |                                                                      | AAL95492.1  unknown     |                                       |    |   |   |   |   |
|               |                        |                      |          |          |          | 16  |            | 22.3746  |                                                                      |                         |                                       |    |   |   |   |   |
| <b>FN1297</b> | -0.261                 | 10.208               | 5.042e-3 | 2.088e-2 | 26       | 29  | 33.8420    | 37.5521  | AAL95493.1  Methionine aminopeptidase                                |                         |                                       |    |   |   |   |   |
|               |                        |                      |          |          | 29       | 27  | 29.0000    | 37.7571  |                                                                      |                         |                                       |    |   |   |   |   |
| <b>FN1298</b> | -1.411                 | 12.551               | 2.195e-3 | 7.624e-3 | 53       | 99  | 68.9857    | 128.1951 | AAL95494.1  Adenylate kinase                                         |                         |                                       |    |   |   |   |   |
|               |                        |                      |          |          | 26       | 89  | 26.0000    | 124.4585 |                                                                      |                         |                                       |    |   |   |   |   |
| <b>FN1299</b> |                        |                      |          |          | 4        |     | 5.2065     |          | AAL95495.1  dTDP-glucose 4,6-dehydratase                             |                         |                                       |    |   |   |   |   |
|               |                        |                      |          |          | 7        |     | 7.0000     |          |                                                                      |                         |                                       |    |   |   |   |   |
| <b>FN1301</b> | -1.250                 | 12.528               | 5.191e-6 | 2.015e-6 | 42       | 88  | 54.6679    | 113.9512 | AAL95497.1  ABC transporter ATP-binding protein                      |                         |                                       |    |   |   |   |   |
|               |                        |                      |          |          | 45       | 88  | 45.0000    | 123.0601 |                                                                      |                         |                                       |    |   |   |   |   |
| <b>FN1302</b> | -1.858                 | 15.374               | 1.188e-3 | 3.661e-3 | 81       | 349 | 105.4309   | 451.9202 | AAL95498.1  Hypothetical protein                                     |                         |                                       |    |   |   |   |   |
|               |                        |                      |          |          | 111      | 238 | 111.0000   | 332.8215 |                                                                      |                         |                                       |    |   |   |   |   |
| <b>FN1303</b> | -0.799                 | 12.879               | 3.786e-5 | 4.019e-5 | 55       | 85  | 71.5889    | 110.0665 | AAL95499.1  hypothetical cytosolic protein                           |                         |                                       |    |   |   |   |   |
|               |                        |                      |          |          | 60       | 85  | 60.0000    | 118.8648 |                                                                      |                         |                                       |    |   |   |   |   |
| <b>FN1304</b> | -0.525                 | 14.306               | 1.29e-4  | 2.185e-4 | 87       | 133 | 113.2406   | 172.2217 | AAL95500.1  Single-strand DNA binding protein                        |                         |                                       |    |   |   |   |   |
|               |                        |                      |          |          | 124      | 121 | 124.0000   | 169.2076 |                                                                      |                         |                                       |    |   |   |   |   |
| <b>FN1305</b> | -0.035                 | 10.780               | 1.491e-1 | 9.309e-1 | 46       | 31  | 59.8744    | 40.1419  | AAL95501.1  Hypothetical cytosolic protein                           |                         |                                       |    |   |   |   |   |
|               |                        |                      |          |          | 23       | 32  | 23.0000    | 44.7491  |                                                                      |                         |                                       |    |   |   |   |   |
| <b>FN1306</b> | 1.030                  | 14.306               | 2.074e-3 | 7.116e-3 | 135      | 75  | 175.7182   | 97.1175  | AAL95502.1  Methyltransferase                                        |                         |                                       |    |   |   |   |   |
|               |                        |                      |          |          | 231      | 73  | 231.0000   | 102.0839 |                                                                      |                         |                                       |    |   |   |   |   |

Show detected proteins only  
 Show all proteins  
 Filter by category:

Proteins found:  
1358

Test Cutoff

| Signif | Direction | Applies To   |
|--------|-----------|--------------|
| yes    | +         | ratios, bars |
| no     | n/a       | bars         |
| yes    | -         | ratios, bars |
| yes    | +         | p-, q-Values |
| yes    | -         |              |

Fn Summary Table

FnPg vs Fn

FnSg vs Fn

FnPgSg vs Fn

FnPgSg vs FnPg

FnSg vs FnPg

FnPgSg vs FnSg

Fn Coverage

| Protein | FnSg vs Fn             |                      |          |          | Raw  |      | Normalized |           | Description                                                 | Log <sub>2</sub> Ratios |    |    |   |   |   |   |
|---------|------------------------|----------------------|----------|----------|------|------|------------|-----------|-------------------------------------------------------------|-------------------------|----|----|---|---|---|---|
|         | Log <sub>2</sub> Ratio | Log <sub>2</sub> Sum | q-Value  | p-Value  | FnSg | Fn   | FnSg       | Fn        |                                                             | -6                      | -4 | -2 | 0 | 2 | 4 | 6 |
| FN1309  | -1.337                 | 15.556               | 2.779e-4 | 5.794e-4 | 87   | 272  | 113.2406   | 352.2129  | AAL95505.1  Hypothetical protein                            |                         |    |    |   |   |   |   |
|         |                        |                      |          |          | 163  | 247  | 163.0000   | 345.4072  |                                                             |                         |    |    |   |   |   |   |
| FN1311  |                        |                      |          |          |      |      |            |           | AAL95507.1  Biopolymer transport exbD protein               |                         |    |    |   |   |   |   |
|         |                        |                      |          |          |      | 8    |            | 11.1873   |                                                             |                         |    |    |   |   |   |   |
| FN1312  |                        |                      |          |          |      |      |            |           | AAL95508.1  Biopolymer transport exbB protein               |                         |    |    |   |   |   |   |
|         |                        |                      |          |          |      | 44   |            | 56.9756   |                                                             |                         |    |    |   |   |   |   |
| FN1313  | -0.678                 | 12.885               | 1.501e-4 | 2.691e-4 |      |      |            |           | AAL95509.1  Oligopeptide-binding protein oppA               |                         |    |    |   |   |   |   |
|         |                        |                      |          |          |      | 58   | 90         | 75.4938   |                                                             |                         |    |    |   |   |   |   |
| FN1315  | -0.215                 | 6.145                |          |          |      |      |            |           | AAL95511.1  Hypothetical protein                            |                         |    |    |   |   |   |   |
|         |                        |                      |          |          |      | 62   | 74         | 62.0000   |                                                             |                         |    |    |   |   |   |   |
| FN1317  | -0.766                 | 7.607                | 6.868e-4 | 1.857e-3 |      |      |            |           | AAL95513.1  RNA polymerase sigma factor                     |                         |    |    |   |   |   |   |
|         |                        |                      |          |          |      | 6    | 7          | 7.8097    |                                                             |                         |    |    |   |   |   |   |
| FN1318  | -0.955                 | 9.979                | 9.638e-4 | 2.849e-3 |      |      |            |           | AAL95514.1  RNA polymerase sigma factor rpoD                |                         |    |    |   |   |   |   |
|         |                        |                      |          |          |      | 8    | 13         | 10.4129   |                                                             |                         |    |    |   |   |   |   |
| FN1319  | 0.640                  | 8.531                | 4.834e-2 | 2.689e-1 |      |      |            |           | AAL95515.1  DNA primase                                     |                         |    |    |   |   |   |   |
|         |                        |                      |          |          |      | 11   | 14         | 11.0000   |                                                             |                         |    |    |   |   |   |   |
| FN1320  | -1.364                 | 16.471               | 5.345e-5 | 6.673e-5 |      |      |            |           | AAL95516.1  Peptidyl-prolyl cis-trans isomerase             |                         |    |    |   |   |   |   |
|         |                        |                      |          |          |      | 22   | 37         | 28.6356   |                                                             |                         |    |    |   |   |   |   |
| FN1321  | 0.313                  | 20.055               | 7.656e-4 | 2.157e-3 |      |      |            |           | AAL95517.1  Acetoacetate metabolism regulatory protein atoC |                         |    |    |   |   |   |   |
|         |                        |                      |          |          |      | 17   | 29         | 17.0000   |                                                             |                         |    |    |   |   |   |   |
| FN1322  | 0.166                  | 8.530                | 7.725e-2 | 4.449e-1 |      |      |            |           | AAL95518.1  Membrane metalloprotease                        |                         |    |    |   |   |   |   |
|         |                        |                      |          |          |      | 10   | 13         | 13.0162   |                                                             |                         |    |    |   |   |   |   |
| FN1323  | -1.237                 | 7.014                | 7.975e-6 | 4.09e-6  |      |      |            |           | AAL95519.1  Thymidylate kinase                              |                         |    |    |   |   |   |   |
|         |                        |                      |          |          |      | 35   | 10         | 35.0000   |                                                             |                         |    |    |   |   |   |   |
| FN1324  | 0.430                  | 10.702               | 4.974e-3 | 2.057e-2 |      |      |            |           | AAL95520.1  1-deoxy-D-xylulose 5-phosphate reductoisomerase |                         |    |    |   |   |   |   |
|         |                        |                      |          |          |      | 168  | 385        | 218.6716  |                                                             |                         |    |    |   |   |   |   |
| FN1326  | -1.212                 | 6.826                |          |          |      |      |            |           | AAL95522.1  Undecaprenyl pyrophosphate synthetase           |                         |    |    |   |   |   |   |
|         |                        |                      |          |          |      | 157  | 335        | 157.0000  |                                                             |                         |    |    |   |   |   |   |
| FN1327  | 1.946                  | 6.083                |          |          |      |      |            |           | AAL95523.1  Dimethylallyltransferase                        |                         |    |    |   |   |   |   |
|         |                        |                      |          |          |      | 849  | 752        | 1105.0725 |                                                             |                         |    |    |   |   |   |   |
| FN1328  |                        |                      |          |          |      |      |            |           | AAL95524.1  Exodeoxyribonuclease VII small subunit          |                         |    |    |   |   |   |   |
|         |                        |                      |          |          |      | 1221 | 643        | 1221.0000 |                                                             |                         |    |    |   |   |   |   |

Show detected proteins only  
 Show all proteins  
 Filter by category:

Proteins found: 1358

Enter (or paste) list of ORFs

Find ORFs

Test Cutoff

q-Value

p-Value

.005

| Signif | Direction | Applies To   |
|--------|-----------|--------------|
| yes    | +         | ratios, bars |
| no     | n/a       | bars         |
| yes    | -         | ratios, bars |
| yes    | +         | p-, q-Values |
| yes    | -         | p-, q-Values |

Dot Plots  Dot Plots

Fn Summary Table

FnPg vs Fn

FnSg vs Fn

FnPgSg vs Fn

FnPgSg vs FnPg

FnSg vs FnPg

FnPgSg vs FnSg

Fn Coverage

| Protein | FnSg vs Fn             |                      |          |          | Raw  |     | Normalized |          | Description                                                        | Log <sub>2</sub> Ratios |    |    |   |   |   |   |
|---------|------------------------|----------------------|----------|----------|------|-----|------------|----------|--------------------------------------------------------------------|-------------------------|----|----|---|---|---|---|
|         | Log <sub>2</sub> Ratio | Log <sub>2</sub> Sum | q-Value  | p-Value  | FnSg | Fn  | FnSg       | Fn       |                                                                    | -6                      | -4 | -2 | 0 | 2 | 4 | 6 |
| FN1330  | 0.042                  | 3.958                |          |          |      | 3   |            | 3.8847   | AAL95526.1  S-adenosylmethionine:tRNA ribosyltransferase-isomerase |                         |    |    |   |   |   |   |
|         |                        |                      |          |          | 4    |     | 4.0000     |          |                                                                    |                         |    |    |   |   |   |   |
| FN1331  |                        |                      |          |          |      | 5   |            | 6.4745   | AAL95527.1  Methyltransferase                                      |                         |    |    |   |   |   |   |
|         |                        |                      |          |          |      | 8   |            | 11.1873  |                                                                    |                         |    |    |   |   |   |   |
| FN1332  | -1.174                 | 11.189               | 2.072e-4 | 3.995e-4 | 21   | 57  | 27.3339    | 73.8093  | AAL95528.1  Bacterial Peptide Chain Release Factor 1 (RF-1)        |                         |    |    |   |   |   |   |
|         |                        |                      |          |          | 37   | 51  | 37.0000    | 71.3189  |                                                                    |                         |    |    |   |   |   |   |
| FN1333  |                        |                      |          |          | 7    |     | 9.1113     |          | AAL95529.1  Hypothetical protein                                   |                         |    |    |   |   |   |   |
|         |                        |                      |          |          | 18   |     | 18.0000    |          |                                                                    |                         |    |    |   |   |   |   |
| FN1334  | -1.623                 | 6.842                | 6.51e-6  | 3.013e-6 | 4    | 15  | 5.2065     | 19.4235  | AAL95530.1  N-acetylmuramoyl-L-alanine amidase                     |                         |    |    |   |   |   |   |
|         |                        |                      |          |          | 7    | 13  | 7.0000     | 18.1793  |                                                                    |                         |    |    |   |   |   |   |
| FN1335  | -1.236                 | 12.265               | 2.61e-3  | 9.432e-3 | 18   | 95  | 23.4291    | 123.0155 | AAL95531.1  Protein translocase subunit YajC                       |                         |    |    |   |   |   |   |
|         |                        |                      |          |          | 68   | 66  | 68.0000    | 92.2950  |                                                                    |                         |    |    |   |   |   |   |
| FN1336  | -1.084                 | 8.699                |          |          |      | 21  |            | 27.1929  | AAL95532.1  Hypothetical protein                                   |                         |    |    |   |   |   |   |
|         |                        |                      |          |          | 14   | 23  | 14.0000    | 32.1634  |                                                                    |                         |    |    |   |   |   |   |
| FN1337  | -2.361                 | 7.976                |          |          |      | 21  |            | 27.1929  | AAL95533.1  unknown                                                |                         |    |    |   |   |   |   |
|         |                        |                      |          |          | 7    | 32  | 7.0000     | 44.7491  |                                                                    |                         |    |    |   |   |   |   |
| FN1340  | -0.680                 | 16.630               | 3.063e-4 | 6.604e-4 | 173  | 288 | 225.1797   | 372.9313 | AAL95536.1  Glutamyl-tRNA synthetase                               |                         |    |    |   |   |   |   |
|         |                        |                      |          |          | 278  | 310 | 278.0000   | 433.5070 |                                                                    |                         |    |    |   |   |   |   |
| FN1341  | -0.459                 | 7.432                | 2.206e-3 | 7.673e-3 | 8    | 13  | 10.4129    | 16.8337  | AAL95537.1  Bacterial Peptide Chain Release Factor 2 (RF-2)        |                         |    |    |   |   |   |   |
|         |                        |                      |          |          | 12   | 10  | 12.0000    | 13.9841  |                                                                    |                         |    |    |   |   |   |   |
| FN1343  | 0.735                  | 8.881                |          |          | 20   | 13  | 26.0323    | 16.8337  | AAL95539.1  seC-independent protein TATD                           |                         |    |    |   |   |   |   |
|         |                        |                      |          |          | 30   |     | 30.0000    |          |                                                                    |                         |    |    |   |   |   |   |
| FN1345  |                        |                      |          |          |      |     |            |          | AAL95541.1  2-hydroxy-6-oxo-6-phenylhexa-2,4-dienoate hydrolase    |                         |    |    |   |   |   |   |
| FN1346  |                        |                      |          |          | 15   |     | 19.5242    |          | AAL95542.1  Hypothetical cytosolic protein                         |                         |    |    |   |   |   |   |
|         |                        |                      |          |          | 19   |     | 19.0000    |          |                                                                    |                         |    |    |   |   |   |   |
| FN1347  | -2.035                 | 7.547                | 5.083e-4 | 1.254e-3 | 5    | 19  | 6.5081     | 24.6031  | AAL95543.1  Hypothetical cytosolic protein                         |                         |    |    |   |   |   |   |
|         |                        |                      |          |          | 7    | 22  | 7.0000     | 30.7650  |                                                                    |                         |    |    |   |   |   |   |
| FN1348  | 0.261                  | 9.781                | 3.153e-2 | 1.691e-1 | 23   | 17  | 29.9372    | 22.0133  | AAL95544.1  ABC transporter ATP-binding protein                    |                         |    |    |   |   |   |   |
|         |                        |                      |          |          | 35   | 23  | 35.0000    | 32.1634  |                                                                    |                         |    |    |   |   |   |   |
| FN1349  | -2.175                 | 8.687                | 1.369e-4 | 2.374e-4 | 7    | 31  | 9.1113     | 40.1419  | AAL95545.1  ABC transporter permease protein                       |                         |    |    |   |   |   |   |
|         |                        |                      |          |          | 10   | 33  | 10.0000    | 46.1475  |                                                                    |                         |    |    |   |   |   |   |

Show detected proteins only  
 Show all proteins  
 Filter by category:

Proteins found: 1358

Test Cutoff

| Signif | Direction | Applies To   |
|--------|-----------|--------------|
| yes    | +         | ratios, bars |
| no     | n/a       | bars         |
| yes    | -         | ratios, bars |
| yes    | +         | p-, q-Values |
| yes    | -         | p-, q-Values |

Fn Summary Table

FnPg vs Fn

FnSg vs Fn

FnPgSg vs Fn

FnPgSg vs FnPg

FnSg vs FnPg

FnPgSg vs FnSg

Fn Coverage

| Protein | FnSg vs Fn             |                      |          |          | Raw  |     | Normalized |          | Description                                              | Log <sub>2</sub> Ratios |    |    |   |   |   |   |
|---------|------------------------|----------------------|----------|----------|------|-----|------------|----------|----------------------------------------------------------|-------------------------|----|----|---|---|---|---|
|         | Log <sub>2</sub> Ratio | Log <sub>2</sub> Sum | q-Value  | p-Value  | FnSg | Fn  | FnSg       | Fn       |                                                          |                         |    |    |   |   |   |   |
|         |                        |                      |          |          |      |     |            |          |                                                          | -6                      | -4 | -2 | 0 | 2 | 4 | 6 |
| FN1351  | -0.432                 | 11.235               | 3.188e-2 | 1.711e-1 | 35   | 33  | 45.5566    | 42.7317  | AAL95547.1  15 kDa lipoprotein precursor                 |                         |    |    |   |   |   |   |
|         |                        |                      |          |          | 39   | 51  | 39.0000    | 71.3189  |                                                          |                         |    |    |   |   |   |   |
| FN1352  | -0.474                 | 11.918               | 3.852e-3 | 1.541e-2 | 35   | 56  | 45.5566    | 72.5144  | AAL95548.1  ABC transporter ATP-binding protein          |                         |    |    |   |   |   |   |
|         |                        |                      |          |          | 60   | 53  | 60.0000    | 74.1157  |                                                          |                         |    |    |   |   |   |   |
| FN1353  | -0.205                 | 7.892                | 1.059e-1 | 6.293e-1 | 9    | 18  | 11.7145    | 23.3082  | AAL95549.1  ABC transporter permease protein             |                         |    |    |   |   |   |   |
|         |                        |                      |          |          | 17   | 7   | 17.0000    | 9.7889   |                                                          |                         |    |    |   |   |   |   |
| FN1354  | -0.699                 | 9.626                | 3.802e-3 | 1.516e-2 | 17   | 24  | 22.1275    | 31.0776  | AAL95550.1  ABC transporter permease protein             |                         |    |    |   |   |   |   |
|         |                        |                      |          |          | 22   | 29  | 22.0000    | 40.5539  |                                                          |                         |    |    |   |   |   |   |
| FN1355  |                        |                      |          |          |      | 4   |            | 5.1796   | AAL95551.1  Integral membrane protein                    |                         |    |    |   |   |   |   |
|         |                        |                      |          |          |      | 7   |            | 9.7889   |                                                          |                         |    |    |   |   |   |   |
| FN1358  |                        |                      |          |          | 22   |     | 28.6356    |          | AAL95554.1  Hypothetical protein                         |                         |    |    |   |   |   |   |
|         |                        |                      |          |          | 46   |     | 46.0000    |          |                                                          |                         |    |    |   |   |   |   |
| FN1359  | 2.297                  | 17.119               | 1.388e-3 | 4.424e-3 | 760  | 116 | 989.2286   | 150.2084 | AAL95555.1  Dipeptide-binding protein                    |                         |    |    |   |   |   |   |
|         |                        |                      |          |          | 683  | 136 | 683.0000   | 190.1837 |                                                          |                         |    |    |   |   |   |   |
| FN1362  |                        |                      |          |          | 76   |     | 98.9229    |          | AAL95558.1  Dipeptide transport ATP-binding protein dppD |                         |    |    |   |   |   |   |
|         |                        |                      |          |          | 82   |     | 82.0000    |          |                                                          |                         |    |    |   |   |   |   |
| FN1363  | 2.705                  | 9.941                | 2.934e-4 | 6.228e-4 | 70   | 6   | 91.1132    | 7.7694   | AAL95559.1  Dipeptide transport ATP-binding protein dppF |                         |    |    |   |   |   |   |
|         |                        |                      |          |          | 69   | 12  | 69.0000    | 16.7809  |                                                          |                         |    |    |   |   |   |   |
| FN1364  |                        |                      |          |          |      | 79  |            | 102.2971 | AAL95560.1  LSU ribosomal protein L32P                   |                         |    |    |   |   |   |   |
|         |                        |                      |          |          |      | 86  |            | 120.2632 |                                                          |                         |    |    |   |   |   |   |
| FN1365  | 0.155                  | 15.281               | 6.373e-2 | 3.617e-1 | 136  | 156 | 177.0199   | 202.0044 | AAL95561.1  GTP-binding protein                          |                         |    |    |   |   |   |   |
|         |                        |                      |          |          | 244  | 126 | 244.0000   | 176.1996 |                                                          |                         |    |    |   |   |   |   |
| FN1366  | -0.778                 | 14.823               | 8.148e-4 | 2.328e-3 | 83   | 190 | 108.0342   | 246.0310 | AAL95562.1  Triosephosphate isomerase                    |                         |    |    |   |   |   |   |
|         |                        |                      |          |          | 152  | 143 | 152.0000   | 199.9726 |                                                          |                         |    |    |   |   |   |   |
| FN1368  |                        |                      |          |          |      |     |            |          | AAL95564.1  COMF operon protein 3                        |                         |    |    |   |   |   |   |
|         |                        |                      |          |          | 4    |     | 4.0000     |          |                                                          |                         |    |    |   |   |   |   |
| FN1371  |                        |                      |          |          |      |     |            |          | AAL95567.1  Ribonuclease HII                             |                         |    |    |   |   |   |   |
|         |                        |                      |          |          | 5    |     | 5.0000     |          |                                                          |                         |    |    |   |   |   |   |
| FN1373  |                        |                      |          |          |      |     |            |          | AAL95569.1  regulatory protein                           |                         |    |    |   |   |   |   |
|         |                        |                      |          |          | 5    |     | 5.0000     |          |                                                          |                         |    |    |   |   |   |   |
| FN1374  | -0.819                 | 6.819                |          |          |      | 11  |            | 14.2439  | AAL95570.1  Transcriptional regulator                    |                         |    |    |   |   |   |   |
|         |                        |                      |          |          | 8    | 10  | 8.0000     | 13.9841  |                                                          |                         |    |    |   |   |   |   |

Show detected proteins only  
 Show all proteins  
 Filter by category:

Proteins found: 1358

Test Cutoff

| Signif | Direction | Applies To   |
|--------|-----------|--------------|
| yes    | +         | ratios, bars |
| no     | n/a       | bars         |
| yes    | -         | ratios, bars |
| yes    | +         | p-, q-Values |
| yes    | -         |              |



Fn Summary Table

FnPg vs Fn

FnSg vs Fn

FnPgSg vs Fn

FnPgSg vs FnPg

FnSg vs FnPg

FnPgSg vs FnSg

Fn Coverage

| Protein | FnSg vs Fn             |                      |          |           | Raw  |     | Normalized |          | Description                                                | Log <sub>2</sub> Ratios |    |    |   |   |   |   |
|---------|------------------------|----------------------|----------|-----------|------|-----|------------|----------|------------------------------------------------------------|-------------------------|----|----|---|---|---|---|
|         | Log <sub>2</sub> Ratio | Log <sub>2</sub> Sum | q-Value  | p-Value   | FnSg | Fn  | FnSg       | Fn       |                                                            | -6                      | -4 | -2 | 0 | 2 | 4 | 6 |
| FN1375  | 0.467                  | 10.557               | 2.935e-2 | 1.562e-1  | 44   | 24  | 57.2711    | 31.0776  | AAL95571.1  Citrate-sodium symport                         |                         |    |    |   |   |   |   |
|         |                        |                      |          |           | 34   | 25  | 34.0000    | 34.9602  |                                                            |                         |    |    |   |   |   |   |
| FN1376  | 0.702                  | 19.411               | 1.056e-2 | 4.97e-2   | 647  | 510 | 842.1459   | 660.3991 | AAL95572.1  Oxaloacetate decarboxylase alpha chain         |                         |    |    |   |   |   |   |
|         |                        |                      |          |           | 1288 | 464 | 1288.0000  | 648.8621 |                                                            |                         |    |    |   |   |   |   |
| FN1377  |                        |                      |          |           | 9    |     | 11.7145    |          | AAL95573.1  CITG protein                                   |                         |    |    |   |   |   |   |
|         |                        |                      |          |           |      |     |            |          |                                                            |                         |    |    |   |   |   |   |
| FN1378  | -0.568                 | 10.247               |          |           | 22   | 31  | 28.6356    | 40.1419  | AAL95574.1  Citrate lyase acyl carrier protein             |                         |    |    |   |   |   |   |
|         |                        |                      |          |           |      | 32  |            | 44.7491  |                                                            |                         |    |    |   |   |   |   |
| FN1379  | 0.954                  | 16.471               | 1.937e-5 | 1.573e-5  | 328  | 179 | 426.9302   | 231.7871 | AAL95575.1  Citrate lyase beta chain                       |                         |    |    |   |   |   |   |
|         |                        |                      |          |           | 412  | 144 | 412.0000   | 201.3710 |                                                            |                         |    |    |   |   |   |   |
| FN1380  | 0.865                  | 18.410               | 1.552e-2 | 7.749e-2  | 431  | 344 | 560.9967   | 445.4457 | AAL95576.1  Citrate lyase beta chain                       |                         |    |    |   |   |   |   |
|         |                        |                      |          |           | 1032 | 307 | 1032.0000  | 429.3118 |                                                            |                         |    |    |   |   |   |   |
| FN1381  |                        |                      |          |           |      | 4   |            | 5.1796   | AAL95577.1  unknown                                        |                         |    |    |   |   |   |   |
|         |                        |                      |          |           |      | 4   |            | 5.5936   |                                                            |                         |    |    |   |   |   |   |
| FN1382  |                        |                      |          |           |      |     |            |          | AAL95578.1  ATPase                                         |                         |    |    |   |   |   |   |
|         |                        |                      |          |           | 7    |     | 7.0000     |          |                                                            |                         |    |    |   |   |   |   |
| FN1383  |                        |                      |          |           | 11   |     | 14.3178    |          | AAL95579.1  DNA polymerase III alpha subunit               |                         |    |    |   |   |   |   |
|         |                        |                      |          |           | 16   |     | 16.0000    |          |                                                            |                         |    |    |   |   |   |   |
| FN1385  | 0.228                  | 6.718                | 1.125e-1 | 6.736e-1  | 4    | 6   | 5.2065     | 7.7694   | AAL95581.1  Hypothetical protein                           |                         |    |    |   |   |   |   |
|         |                        |                      |          |           | 17   | 8   | 17.0000    | 11.1873  |                                                            |                         |    |    |   |   |   |   |
| FN1386  | 1.846                  | 7.654                | 2.145e-3 | 7.413e-3  | 16   | 4   | 20.8259    | 5.1796   | AAL95582.1  SWF/SNF family helicase                        |                         |    |    |   |   |   |   |
|         |                        |                      |          |           | 33   | 7   | 33.0000    | 9.7889   |                                                            |                         |    |    |   |   |   |   |
| FN1391  | -1.705                 | 12.244               | 3.054e-4 | 6.578e-4  | 37   | 110 | 48.1598    | 142.4390 | AAL95584.1  Acetyltransferase                              |                         |    |    |   |   |   |   |
|         |                        |                      |          |           | 29   | 78  | 29.0000    | 109.0760 |                                                            |                         |    |    |   |   |   |   |
| FN1392  | -1.845                 | 13.878               | 1.15e-8  | 1.589e-10 | 48   | 181 | 62.4776    | 234.3769 | AAL95585.1  SSU ribosomal protein S16P                     |                         |    |    |   |   |   |   |
|         |                        |                      |          |           | 67   | 165 | 67.0000    | 230.7376 |                                                            |                         |    |    |   |   |   |   |
| FN1393  | -0.634                 | 11.554               | 1.046e-3 | 3.141e-3  | 30   | 58  | 39.0485    | 75.1042  | AAL95586.1  Signal recognition particle, subunit FFH/SRP54 |                         |    |    |   |   |   |   |
|         |                        |                      |          |           | 49   | 44  | 49.0000    | 61.5300  |                                                            |                         |    |    |   |   |   |   |
| FN1397  | -1.981                 | 13.445               | 3.795e-6 | 1.258e-6  | 44   | 161 | 57.2711    | 208.4789 | AAL95590.1  Glutaminase                                    |                         |    |    |   |   |   |   |
|         |                        |                      |          |           | 49   | 151 | 49.0000    | 211.1599 |                                                            |                         |    |    |   |   |   |   |
| FN1398  | -1.505                 | 12.465               | 3.555e-3 | 1.391e-2  | 34   | 119 | 44.2550    | 154.0931 | AAL95591.1  Amino acid carrier protein alsT                |                         |    |    |   |   |   |   |
|         |                        |                      |          |           | 45   | 71  | 45.0000    | 99.2871  |                                                            |                         |    |    |   |   |   |   |

Show detected proteins only  
 Show all proteins  
 Filter by category:

Proteins found:  
1358

Enter (or paste) list of ORFs

Find ORFs

Test Cutoff

q-Value

p-Value

.005

| Signif | Direction | Applies To   |
|--------|-----------|--------------|
| yes    | +         | ratios, bars |
| no     | n/a       | bars         |
| yes    | -         | ratios, bars |
| yes    | +         | p-, q-Values |
| yes    | -         | p-, q-Values |

Dot Plots  Dot Plots

Fn Summary Table

FnPg vs Fn

FnSg vs Fn

FnPgSg vs Fn

FnPgSg vs FnPg

FnSg vs FnPg

FnPgSg vs FnSg

Fn Coverage

| Protein | FnSg vs Fn             |                      |          |          | Raw  |     | Normalized |           | Description                                                              | Log <sub>2</sub> Ratios |    |    |   |   |   |   |
|---------|------------------------|----------------------|----------|----------|------|-----|------------|-----------|--------------------------------------------------------------------------|-------------------------|----|----|---|---|---|---|
|         | Log <sub>2</sub> Ratio | Log <sub>2</sub> Sum | q-Value  | p-Value  | FnSg | Fn  | FnSg       | Fn        |                                                                          | -6                      | -4 | -2 | 0 | 2 | 4 | 6 |
| FN1399  |                        |                      |          |          | 3    |     | 3.0000     |           | AAL95592.1  Hypothetical cytosolic protein                               |                         |    |    |   |   |   |   |
| FN1406  | 0.273                  | 12.219               | 1.037e-2 | 4.869e-2 | 59   | 43  | 76.7954    | 55.6807   | AAL95599.1  Histidine ammonia-lyase                                      |                         |    |    |   |   |   |   |
| FN1407  | 1.445                  | 8.655                | 9.711e-3 | 4.519e-2 | 34   | 8   | 44.2550    | 10.3592   | AAL95600.1  Glutamate formiminotransferase                               |                         |    |    |   |   |   |   |
| FN1411  | 2.355                  | 16.868               | 1.15e-8  | 1.52e-10 | 594  | 112 | 773.1602   | 145.0288  | AAL95604.1  Threonine dehydratase                                        |                         |    |    |   |   |   |   |
| FN1412  |                        |                      |          |          | 6    |     | 7.8097     |           | AAL95605.1  5-methylthioribose kinase                                    |                         |    |    |   |   |   |   |
| FN1413  |                        |                      |          |          | 4    |     | 4.0000     |           | AAL95606.1  Translation initiation factor EIF-2B subunit 1               |                         |    |    |   |   |   |   |
| FN1415  |                        |                      |          |          | 13   |     | 13.0000    |           | AAL95608.1  NADH-dependent butanol dehydrogenase A                       |                         |    |    |   |   |   |   |
| FN1416  |                        |                      |          |          | 4    |     | 4.0000     |           | AAL95609.1  Transcriptional regulator, GntR family                       |                         |    |    |   |   |   |   |
| FN1417  | 0.839                  | 5.807                |          |          | 10   |     | 13.0162    |           | AAL95610.1  L-fucose phosphate aldolase                                  |                         |    |    |   |   |   |   |
| FN1418  | -0.696                 | 4.271                |          |          | 3    |     | 3.9048     |           | AAL95611.1  Transcriptional regulator, GntR family                       |                         |    |    |   |   |   |   |
| FN1419  | 2.422                  | 21.045               | 1.67e-3  | 5.504e-3 | 2104 | 475 | 2738.6012  | 615.0776  | AAL95612.1  Methionine gamma-lyase                                       |                         |    |    |   |   |   |   |
| FN1421  | 0.598                  | 20.931               | 6.024e-5 | 7.904e-5 | 1356 | 842 | 1764.9921  | 1090.3060 | AAL95614.1  Pyruvate-flavodoxin oxidoreductase                           |                         |    |    |   |   |   |   |
| FN1423  | 0.373                  | 15.542               | 1.053e-4 | 1.669e-4 | 186  | 155 | 242.1007   | 200.7095  | AAL95616.1  Flavoprotein                                                 |                         |    |    |   |   |   |   |
| FN1424  | 0.371                  | 17.677               | 4.366e-3 | 1.774e-2 | 362  | 329 | 471.1852   | 426.0222  | AAL95617.1  ACYL-COA dehydrogenase, short-chain specific                 |                         |    |    |   |   |   |   |
| FN1426  | -1.045                 | 17.652               | 1.195e-6 | 1.975e-7 | 232  | 496 | 301.9750   | 642.2705  | AAL95619.1  Serine protease                                              |                         |    |    |   |   |   |   |
| FN1429  |                        |                      |          |          |      | 7   |            | 9.0643    | AAL95622.1  Branched-chain amino acid transport ATP-binding protein livG |                         |    |    |   |   |   |   |

Show detected proteins only  
 Show all proteins  
 Filter by category:

Proteins found: 1358

Test Cutoff

| Signif | Direction | Applies To   |
|--------|-----------|--------------|
| yes    | +         | ratios, bars |
| no     | n/a       | bars         |
| yes    | -         | ratios, bars |
| yes    | +         | p-, q-Values |
| yes    | -         |              |

Fn Summary Table

FnPg vs Fn

FnSg vs Fn

FnPgSg vs Fn

FnPgSg vs FnPg

FnSg vs FnPg

FnPgSg vs FnSg

Fn Coverage

| Protein | FnSg vs Fn             |                      |          |          | Raw  |     |          |          | Normalized                                                                          |    |      |    | Description | Log <sub>2</sub> Ratios |    |    |   |   |   |   |
|---------|------------------------|----------------------|----------|----------|------|-----|----------|----------|-------------------------------------------------------------------------------------|----|------|----|-------------|-------------------------|----|----|---|---|---|---|
|         | Log <sub>2</sub> Ratio | Log <sub>2</sub> Sum | q-Value  | p-Value  | FnSg | Fn  | FnSg     | Fn       | FnSg                                                                                | Fn | FnSg | Fn |             | -6                      | -4 | -2 | 0 | 2 | 4 | 6 |
| FN1432  | -3.913                 | 7.913                |          |          |      | 52  |          | 67.3348  | AAL95625.1  Leucine-, isoleucine-, valine-, threonine-, and alanine-binding protein |    |      |    |             |                         |    |    |   |   |   |   |
|         |                        |                      |          |          | 4    | 38  | 4.0000   | 53.1396  |                                                                                     |    |      |    |             |                         |    |    |   |   |   |   |
| FN1433  | -0.433                 | 15.634               | 7.703e-4 | 2.176e-3 | 150  | 193 | 195.2425 | 249.9157 | AAL95626.1  Short chain dehydrogenase                                               |    |      |    |             |                         |    |    |   |   |   |   |
|         |                        |                      |          |          | 193  | 196 | 193.0000 | 274.0883 |                                                                                     |    |      |    |             |                         |    |    |   |   |   |   |
| FN1434  | -0.115                 | 14.548               | 2.146e-2 | 1.107e-1 | 114  | 117 | 148.3843 | 151.5033 | AAL95627.1  Tetratricopeptide repeat family protein                                 |    |      |    |             |                         |    |    |   |   |   |   |
|         |                        |                      |          |          | 149  | 122 | 149.0000 | 170.6060 |                                                                                     |    |      |    |             |                         |    |    |   |   |   |   |
| FN1437  | -2.113                 | 14.242               | 4.812e-6 | 1.785e-6 | 56   | 215 | 72.8905  | 278.4036 | AAL95630.1  LSU ribosomal protein L28P                                              |    |      |    |             |                         |    |    |   |   |   |   |
|         |                        |                      |          |          | 61   | 215 | 61.0000  | 300.6581 |                                                                                     |    |      |    |             |                         |    |    |   |   |   |   |
| FN1439  | -3.837                 | 10.146               | 9.237e-4 | 2.705e-3 | 6    | 81  | 7.8097   | 104.8869 | AAL95632.1  Transcriptional regulator, DeoR family                                  |    |      |    |             |                         |    |    |   |   |   |   |
|         |                        |                      |          |          | 10   | 107 | 10.0000  | 149.6298 |                                                                                     |    |      |    |             |                         |    |    |   |   |   |   |
| FN1440  | -2.917                 | 11.540               | 7.387e-5 | 1.075e-4 | 9    | 128 | 11.7145  | 165.7472 | AAL95633.1  1-phosphofructokinase                                                   |    |      |    |             |                         |    |    |   |   |   |   |
|         |                        |                      |          |          | 28   | 96  | 28.0000  | 134.2473 |                                                                                     |    |      |    |             |                         |    |    |   |   |   |   |
| FN1441  | -0.907                 | 14.935               | 6.787e-5 | 9.427e-5 | 111  | 195 | 144.4794 | 252.5055 | AAL95634.1  PTS system, fructose-specific IIABC component                           |    |      |    |             |                         |    |    |   |   |   |   |
|         |                        |                      |          |          | 114  | 166 | 114.0000 | 232.1360 |                                                                                     |    |      |    |             |                         |    |    |   |   |   |   |
| FN1444  | -0.325                 | 17.546               | 2.296e-3 | 8.058e-3 | 274  | 362 | 356.6429 | 468.7539 | AAL95637.1  GMP synthase (glutamine-hydrolyzing)                                    |    |      |    |             |                         |    |    |   |   |   |   |
|         |                        |                      |          |          | 425  | 365 | 425.0000 | 510.4195 |                                                                                     |    |      |    |             |                         |    |    |   |   |   |   |
| FN1445  | -2.200                 | 10.101               | 1.068e-3 | 3.221e-3 | 13   | 46  | 16.9210  | 59.5654  | AAL95638.1  DNA helicase                                                            |    |      |    |             |                         |    |    |   |   |   |   |
|         |                        |                      |          |          | 14   | 59  | 14.0000  | 82.5062  |                                                                                     |    |      |    |             |                         |    |    |   |   |   |   |
| FN1448  |                        |                      |          |          |      |     |          |          | AAL95641.1  Hypothetical cytosolic protein                                          |    |      |    |             |                         |    |    |   |   |   |   |
|         |                        |                      |          |          | 4    |     | 4.0000   |          |                                                                                     |    |      |    |             |                         |    |    |   |   |   |   |
| FN1449  | -4.909                 | 14.158               | 5.988e-6 | 2.575e-6 | 21   | 560 | 27.3339  | 725.1441 | AAL95642.1  Fusobacterium outer membrane protein family                             |    |      |    |             |                         |    |    |   |   |   |   |
|         |                        |                      |          |          | 22   | 541 | 22.0000  | 756.5397 |                                                                                     |    |      |    |             |                         |    |    |   |   |   |   |
| FN1450  | 0.525                  | 9.952                |          |          | 29   | 20  | 37.7469  | 25.8980  | AAL95643.1  Integral membrane protein                                               |    |      |    |             |                         |    |    |   |   |   |   |
|         |                        |                      |          |          |      | 19  |          | 26.5698  |                                                                                     |    |      |    |             |                         |    |    |   |   |   |   |
| FN1451  | 0.586                  | 15.628               | 1.133e-4 | 1.837e-4 | 204  | 139 | 265.5298 | 179.9911 | AAL95644.1  Cell division protein ftsZ                                              |    |      |    |             |                         |    |    |   |   |   |   |
|         |                        |                      |          |          | 286  | 134 | 286.0000 | 187.3869 |                                                                                     |    |      |    |             |                         |    |    |   |   |   |   |
| FN1452  | 0.362                  | 14.120               | 6.061e-3 | 2.585e-2 | 108  | 103 | 140.5746 | 133.3747 | AAL95645.1  Cell division protein ftsA                                              |    |      |    |             |                         |    |    |   |   |   |   |
|         |                        |                      |          |          | 162  | 73  | 162.0000 | 102.0839 |                                                                                     |    |      |    |             |                         |    |    |   |   |   |   |
| FN1454  | -0.589                 | 9.784                | 4.074e-2 | 2.233e-1 | 8    | 26  | 10.4129  | 33.6674  | AAL95647.1  D-alanine--D-alanine ligase                                             |    |      |    |             |                         |    |    |   |   |   |   |
|         |                        |                      |          |          | 38   | 28  | 38.0000  | 39.1555  |                                                                                     |    |      |    |             |                         |    |    |   |   |   |   |
| FN1455  | -0.013                 | 8.644                | 1.432e-1 | 8.879e-1 | 16   | 17  | 20.8259  | 22.0133  | AAL95648.1  UDP-N-acetylenolpyruvoylglucosamine reductase                           |    |      |    |             |                         |    |    |   |   |   |   |
|         |                        |                      |          |          | 19   | 13  | 19.0000  | 18.1793  |                                                                                     |    |      |    |             |                         |    |    |   |   |   |   |

Show detected proteins only  
 Show all proteins  
 Filter by category:  
 GO: amino acid transport

Proteins found:  
 1358

Enter (or paste) list of ORFs

| Test    | Cutoff |
|---------|--------|
| q-Value | .005   |
| p-Value |        |

| Signif | Direction | Applies To   |
|--------|-----------|--------------|
| yes    | +         | ratios, bars |
| no     | n/a       | bars         |
| yes    | -         | ratios, bars |
| yes    | +         | p-, q-Values |
| yes    | -         | p-, q-Values |

Fn Summary Table FnPg vs Fn FnSg vs Fn FnPgSg vs Fn FnPgSg vs FnPg FnSg vs FnPg FnPgSg vs FnSg Fn Coverage

| Protein | FnSg vs Fn             |                      |          |          | Raw  |     | Normalized |          | Description                                                                                     | Log <sub>2</sub> Ratios |    |    |   |   |   |   |
|---------|------------------------|----------------------|----------|----------|------|-----|------------|----------|-------------------------------------------------------------------------------------------------|-------------------------|----|----|---|---|---|---|
|         | Log <sub>2</sub> Ratio | Log <sub>2</sub> Sum | q-Value  | p-Value  | FnSg | Fn  | FnSg       | Fn       |                                                                                                 | -6                      | -4 | -2 | 0 | 2 | 4 | 6 |
| FN1456  | -0.316                 | 12.360               | 2.725e-3 | 9.948e-3 | 53   | 58  | 68.9857    | 75.1042  | AAL95649.1  UDP-N-acetylmuramate--alanine ligase                                                |                         |    |    |   |   |   |   |
|         |                        |                      |          |          | 61   | 62  | 61.0000    | 86.7014  |                                                                                                 |                         |    |    |   |   |   |   |
| FN1457  | -0.428                 | 11.775               | 2.24e-2  | 1.161e-1 | 50   | 51  | 65.0808    | 66.0399  | AAL95650.1  UDP-N-acetylglucosamine-N-acetylmuramyl-Pentapeptide pyrophosphoryl-undecaprenol N- |                         |    |    |   |   |   |   |
|         |                        |                      |          |          | 37   | 51  | 37.0000    | 71.3189  |                                                                                                 |                         |    |    |   |   |   |   |
| FN1458  | -0.350                 | 12.361               | 2.451e-2 | 1.28e-1  | 38   | 66  | 49.4614    | 85.4634  | AAL95651.1  UDP-N-acetylmuramoylalanine--D-glutamate ligase                                     |                         |    |    |   |   |   |   |
|         |                        |                      |          |          | 79   | 56  | 79.0000    | 78.3109  |                                                                                                 |                         |    |    |   |   |   |   |
| FN1459  |                        |                      |          |          |      |     |            |          | AAL95652.1  Phospho-N-acetylmuramoyl-pentapeptide-transferase                                   |                         |    |    |   |   |   |   |
|         |                        |                      |          |          |      | 12  |            | 16.7809  |                                                                                                 |                         |    |    |   |   |   |   |
| FN1461  | -1.210                 | 10.023               | 5.029e-3 | 2.083e-2 | 8    | 38  | 10.4129    | 49.2062  | AAL95654.1  Histidinol-phosphatase                                                              |                         |    |    |   |   |   |   |
|         |                        |                      |          |          | 32   | 35  | 32.0000    | 48.9443  |                                                                                                 |                         |    |    |   |   |   |   |
| FN1462  |                        |                      |          |          | 3    |     | 3.9048     |          | AAL95655.1  Transcriptional regulator, GntR family                                              |                         |    |    |   |   |   |   |
|         |                        |                      |          |          |      |     |            |          |                                                                                                 |                         |    |    |   |   |   |   |
| FN1463  | 0.404                  | 17.015               | 5.54e-5  | 7.014e-5 | 332  | 236 | 432.1367   | 305.5965 | AAL95656.1  pyridoxine biosynthesis protein                                                     |                         |    |    |   |   |   |   |
|         |                        |                      |          |          | 405  | 234 | 405.0000   | 327.2279 |                                                                                                 |                         |    |    |   |   |   |   |
| FN1464  | 0.524                  | 16.620               | 6.288e-5 | 8.419e-5 | 302  | 209 | 393.0882   | 270.6342 | AAL95657.1  1-deoxyxylulose-5-phosphate synthase                                                |                         |    |    |   |   |   |   |
|         |                        |                      |          |          | 368  | 185 | 368.0000   | 258.7058 |                                                                                                 |                         |    |    |   |   |   |   |
| FN1470  | -4.032                 | 8.649                | 2.359e-4 | 4.691e-4 | 3    | 69  | 3.9048     | 89.3481  | AAL95663.1  Hypothetical protein                                                                |                         |    |    |   |   |   |   |
|         |                        |                      |          |          | 6    | 52  | 6.0000     | 72.7173  |                                                                                                 |                         |    |    |   |   |   |   |
| FN1471  | -1.987                 | 5.952                | 7.154e-3 | 3.152e-2 | 3    | 8   | 3.9048     | 10.3592  | AAL95664.1  LACI-family transcription regulator                                                 |                         |    |    |   |   |   |   |
|         |                        |                      |          |          | 4    | 15  | 4.0000     | 20.9761  |                                                                                                 |                         |    |    |   |   |   |   |
| FN1472  | -3.429                 | 12.792               | 4.04e-4  | 9.34e-4  | 21   | 239 | 27.3339    | 309.4812 | AAL95665.1  N-acetylneuraminate-binding protein                                                 |                         |    |    |   |   |   |   |
|         |                        |                      |          |          | 24   | 174 | 24.0000    | 243.3233 |                                                                                                 |                         |    |    |   |   |   |   |
| FN1474  |                        |                      |          |          |      | 8   |            | 10.3592  | AAL95667.1  N-acetylmannosamine kinase                                                          |                         |    |    |   |   |   |   |
|         |                        |                      |          |          |      | 7   |            | 9.7889   |                                                                                                 |                         |    |    |   |   |   |   |
| FN1475  | -2.397                 | 9.041                |          |          |      | 36  |            | 46.6164  | AAL95668.1  N-acetylneuraminate lyase                                                           |                         |    |    |   |   |   |   |
|         |                        |                      |          |          | 10   | 42  | 10.0000    | 58.7332  |                                                                                                 |                         |    |    |   |   |   |   |
| FN1476  |                        |                      |          |          |      | 19  |            | 24.6031  | AAL95669.1  N-acetylmannosamine-6-phosphate 2-epimerase                                         |                         |    |    |   |   |   |   |
|         |                        |                      |          |          |      | 18  |            | 25.1714  |                                                                                                 |                         |    |    |   |   |   |   |
| FN1478  |                        |                      |          |          | 16   |     | 20.8259    |          | AAL95671.1  Hypothetical protein                                                                |                         |    |    |   |   |   |   |
|         |                        |                      |          |          |      |     |            |          |                                                                                                 |                         |    |    |   |   |   |   |
| FN1479  | -0.758                 | 9.918                | 2.551e-4 | 5.183e-4 | 16   | 29  | 20.8259    | 37.5521  | AAL95672.1  Hypothetical protein                                                                |                         |    |    |   |   |   |   |
|         |                        |                      |          |          | 27   | 31  | 27.0000    | 43.3507  |                                                                                                 |                         |    |    |   |   |   |   |

Show detected proteins only  
 Show all proteins  
 Filter by category:

Proteins found: 1358

Enter (or paste) list of ORFs

Find ORFs

Test Cutoff

q-Value p-Value

.005

| Signif | Direction | Applies To   |
|--------|-----------|--------------|
| yes    | +         | ratios, bars |
| no     | n/a       | bars         |
| yes    | -         | ratios, bars |
| yes    | +         | p-, q-Values |
| yes    | -         | p-, q-Values |

Dot Plots Dot Plots

Fn Summary Table

FnPg vs Fn

FnSg vs Fn

FnPgSg vs Fn

FnPgSg vs FnPg

FnSg vs FnPg

FnPgSg vs FnSg

Fn Coverage

| Protein | FnSg vs Fn             |                      |          |          | Raw  |     | Normalized |          | Description                                                           | Log <sub>2</sub> Ratios |    |    |   |   |   |   |
|---------|------------------------|----------------------|----------|----------|------|-----|------------|----------|-----------------------------------------------------------------------|-------------------------|----|----|---|---|---|---|
|         | Log <sub>2</sub> Ratio | Log <sub>2</sub> Sum | q-Value  | p-Value  | FnSg | Fn  | FnSg       | Fn       |                                                                       | -6                      | -4 | -2 | 0 | 2 | 4 | 6 |
| FN1480  | 0.738                  | 9.502                | 6.281e-4 | 1.649e-3 | 25   | 16  | 32.5404    | 20.7184  | AAL95673.1  MG2+ transporter MGTE                                     |                         |    |    |   |   |   |   |
|         |                        |                      |          |          | 37   | 15  | 37.0000    | 20.9761  |                                                                       |                         |    |    |   |   |   |   |
| FN1481  | 0.319                  | 6.311                | 1.055e-1 | 6.27e-1  | 3    | 8   | 3.9048     | 10.3592  | AAL95674.1  Queuine tRNA-ribosyltransferase                           |                         |    |    |   |   |   |   |
|         |                        |                      |          |          | 16   | 4   | 16.0000    | 5.5936   |                                                                       |                         |    |    |   |   |   |   |
| FN1482  | 0.667                  | 12.619               | 3.33e-3  | 1.279e-2 | 66   | 40  | 85.9067    | 51.7960  | AAL95675.1  Guanosine-3',5'-bis (Diphosphate) 3'-pyrophosphohydrolase |                         |    |    |   |   |   |   |
|         |                        |                      |          |          | 114  | 53  | 114.0000   | 74.1157  |                                                                       |                         |    |    |   |   |   |   |
| FN1483  | -1.057                 | 10.294               | 1.05e-4  | 1.663e-4 | 17   | 39  | 22.1275    | 50.5011  | AAL95676.1  Adenine phosphoribosyltransferase                         |                         |    |    |   |   |   |   |
|         |                        |                      |          |          | 27   | 37  | 27.0000    | 51.7412  |                                                                       |                         |    |    |   |   |   |   |
| FN1484  | -0.972                 | 6.825                | 5.444e-3 | 2.281e-2 | 4    | 9   | 5.2065     | 11.6541  | AAL95677.1  Tetratricopeptide repeat family protein                   |                         |    |    |   |   |   |   |
|         |                        |                      |          |          | 10   | 13  | 10.0000    | 18.1793  |                                                                       |                         |    |    |   |   |   |   |
| FN1485  |                        |                      |          |          | 4    |     | 4.0000     |          | AAL95678.1  Transporter                                               |                         |    |    |   |   |   |   |
| FN1486  | -0.572                 | 5.216                |          |          |      | 5   |            | 6.4745   | AAL95679.1  magnesium and cobalt efflux protein CorC                  |                         |    |    |   |   |   |   |
|         |                        |                      |          |          | 5    | 6   | 5.0000     | 8.3905   |                                                                       |                         |    |    |   |   |   |   |
| FN1487  | -0.972                 | 15.222               | 1.898e-6 | 4.186e-7 | 110  | 207 | 143.1778   | 268.0444 | AAL95681.1  Chorismate mutase                                         |                         |    |    |   |   |   |   |
|         |                        |                      |          |          | 136  | 200 | 136.0000   | 279.6819 |                                                                       |                         |    |    |   |   |   |   |
| FN1488  |                        |                      |          |          | 17   |     | 17.0000    |          | AAL95682.1  Methylenetetrahydrofolate dehydrogenase (NADP+)           |                         |    |    |   |   |   |   |
| FN1489  | -0.369                 | 9.486                | 1.483e-2 | 7.364e-2 | 17   | 20  | 22.1275    | 25.8980  | AAL95683.1  Methionyl-tRNA formyltransferase                          |                         |    |    |   |   |   |   |
|         |                        |                      |          |          | 25   | 25  | 25.0000    | 34.9602  |                                                                       |                         |    |    |   |   |   |   |
| FN1490  | 1.571                  | 8.471                | 6.866e-3 | 2.999e-2 | 33   | 5   | 42.9533    | 6.4745   | AAL95684.1  putative regulatory protein                               |                         |    |    |   |   |   |   |
| FN1491  | -0.293                 | 8.675                |          |          | 15   |     | 19.5242    |          | AAL95685.1  PTS system, IIA component                                 |                         |    |    |   |   |   |   |
|         |                        |                      |          |          | 17   | 16  | 17.0000    | 22.3746  |                                                                       |                         |    |    |   |   |   |   |
| FN1492  |                        |                      |          |          | 4    |     | 4.0000     |          | AAL95686.1  DNA repair protein recO                                   |                         |    |    |   |   |   |   |
| FN1493  | -2.101                 | 7.150                | 2.027e-3 | 6.924e-3 | 5    | 23  | 6.5081     | 29.7827  | AAL95687.1  Hypothetical protein                                      |                         |    |    |   |   |   |   |
|         |                        |                      |          |          | 5    | 14  | 5.0000     | 19.5777  |                                                                       |                         |    |    |   |   |   |   |
| FN1494  | -1.536                 | 8.430                | 4.557e-4 | 1.088e-3 | 6    | 24  | 7.8097     | 31.0776  | AAL95680.1  Rod shape-determining protein mreC                        |                         |    |    |   |   |   |   |
|         |                        |                      |          |          | 14   | 23  | 14.0000    | 32.1634  |                                                                       |                         |    |    |   |   |   |   |
| FN1496  | -1.536                 | 8.430                | 4.557e-4 | 1.088e-3 | 6    | 24  | 7.8097     | 31.0776  | AAL95680.1  Rod shape-determining protein mreC                        |                         |    |    |   |   |   |   |
|         |                        |                      |          |          | 14   | 23  | 14.0000    | 32.1634  |                                                                       |                         |    |    |   |   |   |   |

Show detected proteins only  
 Show all proteins  
 Filter by category:

Proteins found: 1358

Enter (or paste) list of ORFs

Find ORFs

Test Cutoff

q-Value

p-Value

| Signif | Direction | Applies To   |
|--------|-----------|--------------|
| yes    | +         | ratios, bars |
| no     | n/a       | bars         |
| yes    | -         | ratios, bars |
| yes    | +         | p-, q-Values |
| yes    | -         | p-, q-Values |

Dot Plots  Dot Plots

Fn Summary Table FnPg vs Fn FnSg vs Fn FnPgSg vs Fn FnPgSg vs FnPg FnSg vs FnPg FnPgSg vs FnSg Fn Coverage

| Protein | FnSg vs Fn             |                      |          |          | Raw  |      | Normalized |           | Description                                                       | Log <sub>2</sub> Ratios |    |    |   |   |
|---------|------------------------|----------------------|----------|----------|------|------|------------|-----------|-------------------------------------------------------------------|-------------------------|----|----|---|---|
|         | Log <sub>2</sub> Ratio | Log <sub>2</sub> Sum | q-Value  | p-Value  | FnSg | Fn   | FnSg       | Fn        |                                                                   | -6                      | -4 | -2 | 0 | 2 |
| FN1499  | -1.628                 | 10.800               | 8.446e-4 | 2.429e-3 | 20   | 65   | 26.0323    | 84.1685   | AAL93625.1  Cell surface protein                                  |                         |    |    |   |   |
|         |                        |                      |          |          | 22   | 46   | 22.0000    | 64.3268   |                                                                   |                         |    |    |   |   |
| FN1504  | -0.873                 | 14.681               | 3.772e-3 | 1.5e-2   | 121  | 179  | 157.4956   | 231.7871  | AAL93630.1  Nickel-binding protein                                |                         |    |    |   |   |
|         |                        |                      |          |          | 82   | 148  | 82.0000    | 206.9646  |                                                                   |                         |    |    |   |   |
| FN1505  | -0.463                 | 15.961               | 1.136e-3 | 3.469e-3 | 183  | 215  | 238.1958   | 278.4036  | AAL93631.1  6,7-dimethyl-8-ribityllumazine synthase               |                         |    |    |   |   |
|         |                        |                      |          |          | 192  | 225  | 192.0000   | 314.6422  |                                                                   |                         |    |    |   |   |
| FN1506  | -0.525                 | 6.865                |          |          |      | 10   |            | 12.9490   | AAL93632.1  Diaminohydroxyphosphoribosylaminopyrimidine deaminase |                         |    |    |   |   |
|         |                        |                      |          |          | 9    |      | 9.0000     |           |                                                                   |                         |    |    |   |   |
| FN1507  |                        |                      |          |          |      |      |            |           | AAL93633.1  Riboflavin synthase alpha chain                       |                         |    |    |   |   |
|         |                        |                      |          |          | 8    |      | 8.0000     |           |                                                                   |                         |    |    |   |   |
| FN1508  | -0.566                 | 12.519               | 1.493e-2 | 7.418e-2 | 33   | 77   | 42.9533    | 99.7073   | AAL93634.1  GTP cyclohydrolase II                                 |                         |    |    |   |   |
|         |                        |                      |          |          | 83   | 62   | 83.0000    | 86.7014   |                                                                   |                         |    |    |   |   |
| FN1512  |                        |                      |          |          |      | 11   |            | 14.2439   | AAL93638.1  hypothetical exported 24-amino acid repeat protein    |                         |    |    |   |   |
|         |                        |                      |          |          |      | 8    |            | 11.1873   |                                                                   |                         |    |    |   |   |
| FN1517  | -0.956                 | 15.597               | 5.742e-4 | 1.469e-3 | 115  | 262  | 149.6859   | 339.2639  | AAL93643.1  Leucyl-tRNA synthetase                                |                         |    |    |   |   |
|         |                        |                      |          |          |      | 170  | 201        | 170.0000  |                                                                   |                         |    |    |   |   |
| FN1518  | -0.740                 | 5.910                |          |          |      | 9    |            | 11.6541   | AAL93644.1  RNA polymerase sigma-H factor                         |                         |    |    |   |   |
|         |                        |                      |          |          | 6    | 6    | 6.0000     | 8.3905    |                                                                   |                         |    |    |   |   |
| FN1519  | -0.504                 | 8.993                | 1.798e-3 | 6.002e-3 | 13   | 21   | 16.9210    | 27.1929   | AAL93645.1  23S rRNA methyltransferase                            |                         |    |    |   |   |
|         |                        |                      |          |          |      | 21   | 19         | 21.0000   |                                                                   |                         |    |    |   |   |
| FN1520  | -1.051                 | 11.266               | 4.193e-5 | 4.721e-5 | 23   | 52   | 29.9372    | 67.3348   | AAL93646.1  UDP-N-acetylglucosamine 1-carboxyvinyltransferase     |                         |    |    |   |   |
|         |                        |                      |          |          |      | 39   | 54         | 39.0000   |                                                                   |                         |    |    |   |   |
| FN1521  |                        |                      |          |          |      | 15   |            | 19.4235   | AAL93647.1  Dipeptide transport system permease protein dppB      |                         |    |    |   |   |
|         |                        |                      |          |          |      |      | 16         |           |                                                                   |                         |    |    |   |   |
| FN1523  | -2.225                 | 15.021               | 2.363e-7 | 2.072e-8 | 72   | 299  | 93.7164    | 387.1752  | AAL93649.1  Dipeptide-binding protein                             |                         |    |    |   |   |
|         |                        |                      |          |          |      | 75   | 287        | 75.0000   |                                                                   |                         |    |    |   |   |
| FN1524  |                        |                      |          |          |      | 5    |            | 6.4745    | AAL93650.1  Dipeptide transport ATP-binding protein dppD          |                         |    |    |   |   |
|         |                        |                      |          |          |      |      | 5          |           |                                                                   |                         |    |    |   |   |
| FN1525  |                        |                      |          |          |      | 5    |            | 6.4745    | AAL93651.1  Dipeptide transport ATP-binding protein dppF          |                         |    |    |   |   |
|         |                        |                      |          |          |      |      | 5          |           |                                                                   |                         |    |    |   |   |
| FN1526  | -2.550                 | 20.542               | 5.399e-6 | 2.151e-6 | 332  | 2415 | 432.1367   | 3127.1841 | AAL93652.1  Fusobacterium outer membrane protein family           |                         |    |    |   |   |
|         |                        |                      |          |          |      | 589  | 2039       | 589.0000  |                                                                   |                         |    |    |   |   |

Show detected proteins only  
 Show all proteins  
 Filter by category:

Proteins found: 1358

Enter (or paste) list of ORFs

Find ORFs

Test Cutoff

q-Value p-Value

.005

| Signif      | Direction | Applies To |
|-------------|-----------|------------|
| red         | yes       | +          |
| yellow      | no        | n/a        |
| green       | yes       | -          |
| pink        | yes       | +          |
| light green | yes       | -          |

Applies To: ratios, bars; ratios, bars; ratios, bars; p-, q-Values

Dot Plots Dot Plots

Fn Summary Table FnPg vs Fn FnSg vs Fn FnPgSg vs Fn FnPgSg vs FnPg FnSg vs FnPg FnPgSg vs FnSg Fn Coverage

| Protein | FnSg vs Fn             |                      |          |          | Raw  |     | Normalized |           | Description                                                                     | Log <sub>2</sub> Ratios |    |    |   |   |   |   |
|---------|------------------------|----------------------|----------|----------|------|-----|------------|-----------|---------------------------------------------------------------------------------|-------------------------|----|----|---|---|---|---|
|         | Log <sub>2</sub> Ratio | Log <sub>2</sub> Sum | q-Value  | p-Value  | FnSg | Fn  | FnSg       | Fn        |                                                                                 | -6                      | -4 | -2 | 0 | 2 | 4 | 6 |
| FN1527  | -3.030                 | 12.651               | 5.453e-5 | 6.86e-5  | 17   | 164 | 22.1275    | 212.3636  | AAL93653.1  Hypothetical protein                                                |                         |    |    |   |   |   |   |
|         |                        |                      |          |          | 34   | 176 | 34.0000    | 246.1201  |                                                                                 |                         |    |    |   |   |   |   |
| FN1528  | -1.980                 | 13.695               | 7.134e-5 | 1.018e-4 | 33   | 173 | 42.9533    | 224.0177  | AAL93654.1  Hypothetical protein                                                |                         |    |    |   |   |   |   |
|         |                        |                      |          |          | 73   | 167 | 73.0000    | 233.5344  |                                                                                 |                         |    |    |   |   |   |   |
| FN1529  | -2.743                 | 10.835               | 1.903e-5 | 1.53e-5  | 20   | 79  | 26.0323    | 102.2971  | AAL93655.1  Hypothetical protein                                                |                         |    |    |   |   |   |   |
|         |                        |                      |          |          | 7    | 85  | 7.0000     | 118.8648  |                                                                                 |                         |    |    |   |   |   |   |
| FN1531  | 0.931                  | 10.693               | 2.863e-5 | 2.691e-5 | 41   | 25  | 53.3663    | 32.3725   | AAL93657.1  murein hydrolase export regulator                                   |                         |    |    |   |   |   |   |
|         |                        |                      |          |          | 59   | 19  | 59.0000    | 26.5698   |                                                                                 |                         |    |    |   |   |   |   |
| FN1533  | -0.564                 | 18.290               | 6.836e-4 | 1.846e-3 | 329  | 534 | 428.2318   | 691.4767  | AAL93659.1  Electron transfer flavoprotein alpha-subunit                        |                         |    |    |   |   |   |   |
|         |                        |                      |          |          | 503  | 490 | 503.0000   | 685.2208  |                                                                                 |                         |    |    |   |   |   |   |
| FN1534  | -0.096                 | 19.572               | 3.63e-2  | 1.973e-1 | 651  | 657 | 847.3524   | 850.7495  | AAL93660.1  Electron transfer flavoprotein beta-subunit                         |                         |    |    |   |   |   |   |
|         |                        |                      |          |          | 860  | 697 | 860.0000   | 974.6916  |                                                                                 |                         |    |    |   |   |   |   |
| FN1535  | 0.483                  | 20.907               | 6.664e-3 | 2.893e-2 | 1107 | 873 | 1440.8895  | 1130.4479 | AAL93661.1  Acyl-CoA dehydrogenase, short-chain specific                        |                         |    |    |   |   |   |   |
|         |                        |                      |          |          | 1875 | 888 | 1875.0000  | 1241.7878 |                                                                                 |                         |    |    |   |   |   |   |
| FN1536  | 1.421                  | 19.115               | 1.569e-3 | 5.121e-3 | 806  | 369 | 1049.1029  | 477.8182  | AAL93662.1  (S)-2-hydroxy-acid oxidase chain D                                  |                         |    |    |   |   |   |   |
|         |                        |                      |          |          | 1417 | 317 | 1417.0000  | 443.2959  |                                                                                 |                         |    |    |   |   |   |   |
| FN1537  | -1.040                 | 5.684                |          |          |      | 4   |            | 5.1796    | AAL93663.1  Arsenical pump-driving ATPase                                       |                         |    |    |   |   |   |   |
|         |                        |                      |          |          | 5    | 11  | 5.0000     | 15.3825   |                                                                                 |                         |    |    |   |   |   |   |
| FN1538  | 0.712                  | 8.750                | 4.796e-3 | 1.973e-2 | 17   | 11  | 22.1275    | 14.2439   | AAL93664.1  Arsenical pump-driving ATPase                                       |                         |    |    |   |   |   |   |
|         |                        |                      |          |          | 31   | 13  | 31.0000    | 18.1793   |                                                                                 |                         |    |    |   |   |   |   |
| FN1539  | -0.327                 | 15.678               | 1.615e-4 | 2.967e-4 | 162  | 205 | 210.8619   | 265.4546  | AAL93665.1  Iron-sulfur cluster-binding protein                                 |                         |    |    |   |   |   |   |
|         |                        |                      |          |          | 198  | 177 | 198.0000   | 247.5185  |                                                                                 |                         |    |    |   |   |   |   |
| FN1540  | 0.786                  | 16.744               | 1.611e-4 | 2.958e-4 | 355  | 205 | 462.0739   | 265.4546  | AAL93666.1  Iron-sulfur cluster-binding protein                                 |                         |    |    |   |   |   |   |
|         |                        |                      |          |          | 408  | 171 | 408.0000   | 239.1281  |                                                                                 |                         |    |    |   |   |   |   |
| FN1544  | 1.512                  | 17.022               | 4.949e-4 | 1.211e-3 | 428  | 162 | 557.0919   | 209.7738  | AAL93670.1  Probable electron transfer flavoprotein-quinone oxidoreductase ydiS |                         |    |    |   |   |   |   |
|         |                        |                      |          |          | 675  | 159 | 675.0000   | 222.3471  |                                                                                 |                         |    |    |   |   |   |   |
| FN1545  | 0.334                  | 10.149               | 2.383e-2 | 1.242e-1 | 32   | 28  | 41.6517    | 36.2572   | AAL93671.1  Ferredoxin like protein                                             |                         |    |    |   |   |   |   |
|         |                        |                      |          |          | 34   | 17  | 34.0000    | 23.7730   |                                                                                 |                         |    |    |   |   |   |   |
| FN1546  | 0.545                  | 20.470               | 5.559e-4 | 1.409e-3 | 1041 | 730 | 1354.9828  | 945.2772  | AAL93672.1  Protein Translation Elongation Factor G (EF-G)                      |                         |    |    |   |   |   |   |
|         |                        |                      |          |          | 1557 | 751 | 1557.0000  | 1050.2057 |                                                                                 |                         |    |    |   |   |   |   |
| FN1547  | -0.863                 | 14.636               | 2.552e-5 | 2.31e-5  | 95   | 165 | 123.6536   | 213.6585  | AAL93673.1  PTS permease for N-acetylglucosamine and glucose                    |                         |    |    |   |   |   |   |
|         |                        |                      |          |          | 113  | 155 | 113.0000   | 216.7535  |                                                                                 |                         |    |    |   |   |   |   |

Show detected proteins only  
 Show all proteins  
 Filter by category:

Proteins found: 1358

Enter (or paste) list of ORFs

Find ORFs

Test Cutoff

q-Value p-Value

.005

| Signif | Direction | Applies To   |
|--------|-----------|--------------|
| yes    | +         | ratios, bars |
| no     | n/a       | bars         |
| yes    | -         | ratios, bars |
| yes    | +         | p-, q-Values |
| yes    | -         | p-, q-Values |

Dot Plots Dot Plots

Fn Summary Table FnPg vs Fn FnSg vs Fn FnPgSg vs Fn FnPgSg vs FnPg FnSg vs FnPg FnPgSg vs FnSg Fn Coverage

| Protein | FnSg vs Fn             |                      |          |          | Raw  |      | Normalized |           | Description                                                           | Log <sub>2</sub> Ratios |    |    |   |   |   |   |
|---------|------------------------|----------------------|----------|----------|------|------|------------|-----------|-----------------------------------------------------------------------|-------------------------|----|----|---|---|---|---|
|         | Log <sub>2</sub> Ratio | Log <sub>2</sub> Sum | q-Value  | p-Value  | FnSg | Fn   | FnSg       | Fn        |                                                                       | -6                      | -4 | -2 | 0 | 2 | 4 | 6 |
| FN1548  | -0.370                 | 10.345               | 7.522e-2 | 4.322e-1 | 38   | 32   | 49.4614    | 41.4368   | AAL93674.1  Hypothetical protein                                      |                         |    |    |   |   |   |   |
|         |                        |                      |          |          | 14   | 29   | 14.0000    | 40.5539   |                                                                       |                         |    |    |   |   |   |   |
| FN1549  | -0.254                 | 19.544               | 4.367e-2 | 2.407e-1 | 750  | 667  | 976.2124   | 863.6985  | AAL93675.1  Stomatin like protein                                     |                         |    |    |   |   |   |   |
|         |                        |                      |          |          | 625  | 748  | 625.0000   | 1046.0105 |                                                                       |                         |    |    |   |   |   |   |
| FN1552  | -0.844                 | 7.184                |          |          |      | 12   |            | 15.5388   | AAL93678.1  abortive phage resistance protein                         |                         |    |    |   |   |   |   |
|         |                        |                      |          |          | 9    | 12   | 9.0000     | 16.7809   |                                                                       |                         |    |    |   |   |   |   |
| FN1553  | -0.142                 | 9.062                | 1.157e-1 | 6.955e-1 | 10   | 17   | 13.0162    | 22.0133   | AAL93679.1  abortive phage resistance protein                         |                         |    |    |   |   |   |   |
|         |                        |                      |          |          | 31   | 19   | 31.0000    | 26.5698   |                                                                       |                         |    |    |   |   |   |   |
| FN1554  | -1.338                 | 16.473               | 1.007e-4 | 1.577e-4 | 114  | 337  | 148.3843   | 436.3814  | AAL93680.1  Fusobacterium outer membrane protein family               |                         |    |    |   |   |   |   |
|         |                        |                      |          |          | 231  | 374  | 231.0000   | 523.0052  |                                                                       |                         |    |    |   |   |   |   |
| FN1555  | 0.072                  | 24.020               | 1.043e-2 | 4.901e-2 | 3291 | 3198 | 4283.6201  | 4141.0910 | AAL93681.1  Protein Translation Elongation Factor Tu                  |                         |    |    |   |   |   |   |
|         |                        |                      |          |          | 4174 | 2792 | 4174.0000  | 3904.3599 |                                                                       |                         |    |    |   |   |   |   |
| FN1556  | -1.342                 | 19.883               | 4.77e-4  | 1.154e-3 | 372  | 1210 | 484.2014   | 1566.8293 | AAL93682.1  Protein Translation Elongation Factor G (EF-G)            |                         |    |    |   |   |   |   |
|         |                        |                      |          |          | 751  | 1119 | 751.0000   | 1564.8205 |                                                                       |                         |    |    |   |   |   |   |
| FN1557  | 0.505                  | 13.816               | 6.96e-5  | 9.795e-5 | 113  | 79   | 147.0827   | 102.2971  | AAL93683.1  SSU ribosomal protein S7P                                 |                         |    |    |   |   |   |   |
|         |                        |                      |          |          | 139  | 71   | 139.0000   | 99.2871   |                                                                       |                         |    |    |   |   |   |   |
| FN1560  | 0.726                  | 15.424               | 1.205e-5 | 7.989e-6 | 200  | 133  | 260.3233   | 172.2217  | AAL93686.1  unknown                                                   |                         |    |    |   |   |   |   |
|         |                        |                      |          |          | 279  | 110  | 279.0000   | 153.8251  |                                                                       |                         |    |    |   |   |   |   |
| FN1562  | -0.144                 | 7.989                | 2.775e-2 | 1.468e-1 | 11   | 14   | 14.3178    | 18.1286   | AAL93688.1  Phospho-2-dehydro-3-deoxyheptonate aldolase               |                         |    |    |   |   |   |   |
|         |                        |                      |          |          | 16   | 11   | 16.0000    | 15.3825   |                                                                       |                         |    |    |   |   |   |   |
| FN1576  |                        |                      |          |          | 5    |      | 6.5081     |           | AAL93691.1  ATPases and helicase subunits involved in DNA replication |                         |    |    |   |   |   |   |
| FN1577  | 1.133                  | 16.169               | 4.636e-5 | 5.509e-5 | 325  | 134  | 423.0254   | 173.5166  | AAL93692.1  Rod shape-determining protein mreB                        |                         |    |    |   |   |   |   |
|         |                        |                      |          |          | 381  | 138  | 381.0000   | 192.9805  |                                                                       |                         |    |    |   |   |   |   |
| FN1579  | 0.259                  | 13.276               | 1.429e-2 | 7.063e-2 | 76   | 78   | 98.9229    | 101.0022  | AAL93694.1  CysteinyI-tRNA synthetase                                 |                         |    |    |   |   |   |   |
|         |                        |                      |          |          | 119  | 58   | 119.0000   | 81.1078   |                                                                       |                         |    |    |   |   |   |   |
| FN1580  | -1.373                 | 4.543                |          |          |      | 6    |            | 7.7694    | AAL93695.1  2-C-methyl-D-erythritol 4-phosphate cytidylyltransferase  |                         |    |    |   |   |   |   |
|         |                        |                      |          |          | 3    |      | 3.0000     |           |                                                                       |                         |    |    |   |   |   |   |
| FN1581  | 0.409                  | 11.994               | 2.001e-2 | 1.025e-1 | 67   | 37   | 87.2083    | 47.9113   | AAL93696.1  DNA mismatch repair protein mutS                          |                         |    |    |   |   |   |   |
|         |                        |                      |          |          | 60   | 45   | 60.0000    | 62.9284   |                                                                       |                         |    |    |   |   |   |   |
| FN1582  | 0.568                  | 8.455                |          |          | 12   |      | 15.6194    |           | AAL93697.1  Hypothetical protein                                      |                         |    |    |   |   |   |   |
|         |                        |                      |          |          | 30   | 11   | 30.0000    | 15.3825   |                                                                       |                         |    |    |   |   |   |   |

Show detected proteins only  
 Show all proteins  
 Filter by category:

Proteins found: 1358

Enter (or paste) list of ORFs

Find ORFs

Test Cutoff

q-Value p-Value

.005

| Signif | Direction | Applies To   |
|--------|-----------|--------------|
| yes    | +         | ratios, bars |
| no     | n/a       | bars         |
| yes    | -         | ratios, bars |
| yes    | +         | p-, q-Values |
| yes    | -         | p-, q-Values |

Dot Plots Dot Plots



Fn Summary Table FnPg vs Fn FnSg vs Fn FnPgSg vs Fn FnPgSg vs FnPg FnSg vs FnPg FnPgSg vs FnSg Fn Coverage

| Protein | FnSg vs Fn             |                      |          |          | Raw  |      | Normalized |           | Description                                                      | Log <sub>2</sub> Ratios |    |    |   |   |   |   |
|---------|------------------------|----------------------|----------|----------|------|------|------------|-----------|------------------------------------------------------------------|-------------------------|----|----|---|---|---|---|
|         | Log <sub>2</sub> Ratio | Log <sub>2</sub> Sum | q-Value  | p-Value  | FnSg | Fn   | FnSg       | Fn        |                                                                  | -6                      | -4 | -2 | 0 | 2 | 4 | 6 |
| FN1586  |                        |                      |          |          | 9    |      | 11.7145    |           | AAL93701.1  O-succinylbenzoate-CoA synthase                      |                         |    |    |   |   |   |   |
|         |                        |                      |          |          | 9    |      | 9.0000     |           |                                                                  |                         |    |    |   |   |   |   |
| FN1589  | -0.798                 | 10.823               | 3.784e-3 | 1.506e-2 | 25   | 37   | 32.5404    | 47.9113   | AAL93704.1  LexA repressor                                       |                         |    |    |   |   |   |   |
|         |                        |                      |          |          | 32   | 46   | 32.0000    | 64.3268   |                                                                  |                         |    |    |   |   |   |   |
| FN1590  |                        |                      |          |          | 3    |      | 3.9048     |           | AAL93705.1  Hypothetical lipoprotein                             |                         |    |    |   |   |   |   |
|         |                        |                      |          |          | 4    |      | 4.0000     |           |                                                                  |                         |    |    |   |   |   |   |
| FN1591  | -0.828                 | 15.915               | 1.573e-3 | 5.135e-3 | 173  | 247  | 225.1797   | 319.8404  | AAL93706.1  RNFB-related protein                                 |                         |    |    |   |   |   |   |
|         |                        |                      |          |          | 148  | 245  | 148.0000   | 342.6104  |                                                                  |                         |    |    |   |   |   |   |
| FN1592  |                        |                      |          |          |      |      |            |           | AAL93707.1  Na(+)-translocating NADH-quinone reductase subunit D |                         |    |    |   |   |   |   |
|         |                        |                      |          |          | 6    |      | 6.0000     |           |                                                                  |                         |    |    |   |   |   |   |
| FN1594  | -0.772                 | 11.027               | 3.114e-4 | 6.754e-4 | 23   | 49   | 29.9372    | 63.4501   | AAL93709.1  Nitrogen fixation protein RNFG                       |                         |    |    |   |   |   |   |
|         |                        |                      |          |          | 40   | 40   | 40.0000    | 55.9364   |                                                                  |                         |    |    |   |   |   |   |
| FN1595  | -0.390                 | 13.951               | 3.337e-3 | 1.283e-2 | 76   | 121  | 98.9229    | 156.6829  | AAL93710.1  Na(+)-translocating NADH-quinone reductase subunit B |                         |    |    |   |   |   |   |
|         |                        |                      |          |          | 121  | 94   | 121.0000   | 131.4505  |                                                                  |                         |    |    |   |   |   |   |
| FN1596  | -1.721                 | 19.116               | 5.396e-5 | 6.761e-5 | 359  | 1055 | 467.2803   | 1366.1198 | AAL93711.1  Nitrogen fixation iron-sulphur protein RNFC          |                         |    |    |   |   |   |   |
|         |                        |                      |          |          | 363  | 980  | 363.0000   | 1370.4415 |                                                                  |                         |    |    |   |   |   |   |
| FN1597  |                        |                      |          |          |      | 11   |            | 14.2439   | AAL93712.1  Peptidyl-tRNA hydrolase                              |                         |    |    |   |   |   |   |
|         |                        |                      |          |          |      | 14   |            | 19.5777   |                                                                  |                         |    |    |   |   |   |   |
| FN1600  | -0.202                 | 5.714                |          |          | 5    | 6    | 6.5081     | 7.7694    | AAL93715.1  tRNA pseudouridine synthase A                        |                         |    |    |   |   |   |   |
|         |                        |                      |          |          | 7    |      | 7.0000     |           |                                                                  |                         |    |    |   |   |   |   |
| FN1601  | 0.726                  | 5.694                |          |          | 5    |      | 6.5081     |           | AAL93716.1  Hypothetical cytosolic protein                       |                         |    |    |   |   |   |   |
|         |                        |                      |          |          | 12   | 4    | 12.0000    | 5.5936    |                                                                  |                         |    |    |   |   |   |   |
| FN1603  | -2.466                 | 6.871                | 4.153e-4 | 9.665e-4 | 4    | 22   | 5.2065     | 28.4878   | AAL93718.1  2',3'-cyclic nucleotide 3'-phosphodiesterase         |                         |    |    |   |   |   |   |
|         |                        |                      |          |          | 4    | 16   | 4.0000     | 22.3746   |                                                                  |                         |    |    |   |   |   |   |
| FN1605  | -0.305                 | 16.915               | 9.648e-4 | 2.853e-3 | 240  | 314  | 312.3880   | 406.5987  | AAL93720.1  Adenylosuccinate synthetase                          |                         |    |    |   |   |   |   |
|         |                        |                      |          |          | 320  | 268  | 320.0000   | 374.7738  |                                                                  |                         |    |    |   |   |   |   |
| FN1606  | -0.891                 | 11.047               | 8.397e-5 | 1.259e-4 | 25   | 46   | 32.5404    | 59.5654   | AAL93721.1  3-deoxy-D-manno-octulosonic-acid transferase         |                         |    |    |   |   |   |   |
|         |                        |                      |          |          | 35   | 47   | 35.0000    | 65.7253   |                                                                  |                         |    |    |   |   |   |   |
| FN1607  | -0.342                 | 8.914                | 5.076e-2 | 2.837e-1 | 10   | 22   | 13.0162    | 28.4878   | AAL93722.1  Cytidylate kinase                                    |                         |    |    |   |   |   |   |
|         |                        |                      |          |          | 26   | 15   | 26.0000    | 20.9761   |                                                                  |                         |    |    |   |   |   |   |
| FN1608  |                        |                      |          |          | 7    |      | 9.1113     |           | AAL93723.1  Ribosomal protein L11 methyltransferase              |                         |    |    |   |   |   |   |
|         |                        |                      |          |          | 9    |      | 9.0000     |           |                                                                  |                         |    |    |   |   |   |   |

Show detected proteins only  
 Show all proteins  
 Filter by category:

Proteins found: 1358

Enter (or paste) list of ORFs

Find ORFs

Test Cutoff

q-Value

p-Value

.005

| Signif | Direction | Applies To   |
|--------|-----------|--------------|
| yes    | +         | ratios, bars |
| no     | n/a       | bars         |
| yes    | -         | ratios, bars |
| yes    | +         | p-, q-Values |
| yes    | -         | p-, q-Values |

Dot Plots Dot Plots

Fn Summary Table FnPg vs Fn FnSg vs Fn FnPgSg vs Fn FnPgSg vs FnPg FnSg vs FnPg FnPgSg vs FnSg Fn Coverage

| Protein | FnSg vs Fn             |                      |          |          | Raw  |      | Normalized |           | Description                                          | Log <sub>2</sub> Ratios |    |    |   |   |
|---------|------------------------|----------------------|----------|----------|------|------|------------|-----------|------------------------------------------------------|-------------------------|----|----|---|---|
|         | Log <sub>2</sub> Ratio | Log <sub>2</sub> Sum | q-Value  | p-Value  | FnSg | Fn   | FnSg       | Fn        |                                                      | -6                      | -4 | -2 | 0 | 2 |
| FN1609  | -3.883                 | 8.192                | 1.548e-4 | 2.81e-4  | 3    | 55   | 3.9048     | 71.2195   | AAL93724.1  Hypothetical protein                     |                         |    |    |   |   |
|         |                        |                      |          |          | 5    | 43   | 5.0000     | 60.1316   |                                                      |                         |    |    |   |   |
| FN1610  | 0.512                  | 9.873                | 4.198e-4 | 9.797e-4 | 27   | 18   | 35.1436    | 23.3082   | AAL93725.1  33 kDa chaperonin                        |                         |    |    |   |   |
|         |                        |                      |          |          | 38   | 20   | 38.0000    | 27.9682   |                                                      |                         |    |    |   |   |
| FN1611  |                        |                      |          |          |      |      |            |           | AAL93726.1  Competence protein                       |                         |    |    |   |   |
|         |                        |                      |          |          |      | 3    |            | 4.1952    |                                                      |                         |    |    |   |   |
| FN1613  | -0.305                 | 8.802                | 5.135e-2 | 2.873e-1 | 10   | 19   | 13.0162    | 24.6031   | AAL93728.1  Hypothetical protein                     |                         |    |    |   |   |
|         |                        |                      |          |          | 25   | 16   | 25.0000    | 22.3746   |                                                      |                         |    |    |   |   |
| FN1614  | -1.318                 | 9.373                | 3.635e-3 | 1.431e-2 | 12   | 25   | 15.6194    | 32.3725   | AAL93729.1  MG(2+) chelatase family protein          |                         |    |    |   |   |
|         |                        |                      |          |          | 17   | 35   | 17.0000    | 48.9443   |                                                      |                         |    |    |   |   |
| FN1616  | -0.652                 | 7.822                |          |          |      | 14   |            | 18.1286   | AAL93731.1  N utilization substance protein B        |                         |    |    |   |   |
|         |                        |                      |          |          | 12   | 14   | 12.0000    | 19.5777   |                                                      |                         |    |    |   |   |
| FN1618  | 0.513                  | 10.982               | 2.119e-3 | 7.304e-3 | 38   | 29   | 49.4614    | 37.5521   | AAL93733.1  Hypothetical protein                     |                         |    |    |   |   |
|         |                        |                      |          |          | 58   | 27   | 58.0000    | 37.7571   |                                                      |                         |    |    |   |   |
| FN1619  | 1.088                  | 14.596               | 8.853e-3 | 4.044e-2 | 129  | 90   | 167.9085   | 116.5410  | AAL93734.1  Hypothetical cytosolic protein           |                         |    |    |   |   |
|         |                        |                      |          |          | 291  | 71   | 291.0000   | 99.2871   |                                                      |                         |    |    |   |   |
| FN1620  | -1.141                 | 18.170               | 5.5e-5   | 6.944e-5 | 296  | 589  | 385.2785   | 762.6962  | AAL93735.1  SSU ribosomal protein S2P                |                         |    |    |   |   |
|         |                        |                      |          |          | 346  | 608  | 346.0000   | 850.2331  |                                                      |                         |    |    |   |   |
| FN1621  | -1.772                 | 19.966               | 2.151e-6 | 5.041e-7 | 379  | 1389 | 493.3127   | 1798.6164 | AAL93736.1  Protein Translation Elongation Factor Ts |                         |    |    |   |   |
|         |                        |                      |          |          | 602  | 1388 | 602.0000   | 1940.9927 |                                                      |                         |    |    |   |   |
| FN1622  | -1.300                 | 14.828               | 2.136e-3 | 7.376e-3 | 51   | 207  | 66.3824    | 268.0444  | AAL93737.1  Uridylate kinase                         |                         |    |    |   |   |
|         |                        |                      |          |          | 151  | 191  | 151.0000   | 267.0963  |                                                      |                         |    |    |   |   |
| FN1623  | -2.822                 | 11.066               | 3.864e-4 | 8.838e-4 | 16   | 107  | 20.8259    | 138.5543  | AAL93738.1  Ribosome Recycling Factor (RRF)          |                         |    |    |   |   |
|         |                        |                      |          |          | 14   | 77   | 14.0000    | 107.6775  |                                                      |                         |    |    |   |   |
| FN1624  | -2.311                 | 10.807               |          |          |      | 70   |            | 90.6430   | AAL93739.1  Protein translocase subunit secY         |                         |    |    |   |   |
|         |                        |                      |          |          | 19   | 70   | 19.0000    | 97.8887   |                                                      |                         |    |    |   |   |
| FN1625  | -1.252                 | 13.608               | 3.134e-5 | 3.048e-5 | 59   | 140  | 76.7954    | 181.2860  | AAL93740.1  LSU ribosomal protein L15P               |                         |    |    |   |   |
|         |                        |                      |          |          | 68   | 117  | 68.0000    | 163.6139  |                                                      |                         |    |    |   |   |
| FN1626  | -4.316                 | 8.960                |          |          |      | 75   |            | 97.1175   | AAL93741.1  LSU ribosomal protein L30P               |                         |    |    |   |   |
|         |                        |                      |          |          | 5    | 73   | 5.0000     | 102.0839  |                                                      |                         |    |    |   |   |
| FN1627  | -1.029                 | 17.054               | 6.439e-6 | 2.95e-6  | 184  | 397  | 239.4974   | 514.0754  | AAL93742.1  SSU ribosomal protein S5P                |                         |    |    |   |   |
|         |                        |                      |          |          | 277  | 386  | 277.0000   | 539.7861  |                                                      |                         |    |    |   |   |

Show detected proteins only  
 Show all proteins  
 Filter by category:

Proteins found:  
1358

Test Cutoff

| Signif | Direction | Applies To   |
|--------|-----------|--------------|
| yes    | +         | ratios, bars |
| no     | n/a       | bars         |
| yes    | -         | ratios, bars |
| yes    | +         | p-, q-Values |
| yes    | -         | p-, q-Values |

Fn Summary Table FnPg vs Fn FnSg vs Fn FnPgSg vs Fn FnPgSg vs FnPg FnSg vs FnPg FnPgSg vs FnSg Fn Coverage

| Protein | FnSg vs Fn             |                      |          |          | Raw  |     | Normalized |           | Description                            | Log <sub>2</sub> Ratios |    |    |   |   |   |   |
|---------|------------------------|----------------------|----------|----------|------|-----|------------|-----------|----------------------------------------|-------------------------|----|----|---|---|---|---|
|         | Log <sub>2</sub> Ratio | Log <sub>2</sub> Sum | q-Value  | p-Value  | FnSg | Fn  | FnSg       | Fn        |                                        | -6                      | -4 | -2 | 0 | 2 | 4 | 6 |
| FN1628  | -3.678                 | 11.608               |          |          | 12   | 177 | 15.6194    | 229.1973  | AAL93743.1  LSU ribosomal protein L18P |                         |    |    |   |   |   |   |
|         |                        |                      |          |          |      | 122 |            | 170.6060  |                                        |                         |    |    |   |   |   |   |
| FN1629  | -1.720                 | 16.996               | 1.419e-6 | 2.647e-7 | 167  | 524 | 217.3700   | 678.5277  | AAL93744.1  LSU ribosomal protein L6P  |                         |    |    |   |   |   |   |
|         |                        |                      |          |          | 181  | 453 | 181.0000   | 633.4796  |                                        |                         |    |    |   |   |   |   |
| FN1630  | -0.930                 | 13.178               | 2.757e-5 | 2.558e-5 | 58   | 108 | 75.4938    | 139.8492  | AAL93745.1  SSU ribosomal protein S8P  |                         |    |    |   |   |   |   |
|         |                        |                      |          |          | 64   | 90  | 64.0000    | 125.8569  |                                        |                         |    |    |   |   |   |   |
| FN1631  | -1.730                 | 5.660                |          |          | 3    | 10  | 3.9048     | 12.9490   | AAL93746.1  SSU ribosomal protein S14P |                         |    |    |   |   |   |   |
|         |                        |                      |          |          |      |     |            |           |                                        |                         |    |    |   |   |   |   |
| FN1632  | -0.907                 | 16.744               | 6.301e-5 | 8.445e-5 | 208  | 367 | 270.7362   | 475.2284  | AAL93747.1  LSU ribosomal protein L5P  |                         |    |    |   |   |   |   |
|         |                        |                      |          |          | 213  | 309 | 213.0000   | 432.1086  |                                        |                         |    |    |   |   |   |   |
| FN1634  | -1.227                 | 9.388                |          |          | 13   | 32  | 16.9210    | 41.4368   | AAL93749.1  LSU ribosomal protein L24P |                         |    |    |   |   |   |   |
|         |                        |                      |          |          |      | 27  |            | 37.7571   |                                        |                         |    |    |   |   |   |   |
| FN1635  | -2.045                 | 9.144                | 5.747e-6 | 2.393e-6 | 8    | 39  | 10.4129    | 50.5011   | AAL93750.1  LSU ribosomal protein L14P |                         |    |    |   |   |   |   |
|         |                        |                      |          |          | 13   | 33  | 13.0000    | 46.1475   |                                        |                         |    |    |   |   |   |   |
| FN1636  | -0.115                 | 12.651               | 8.779e-2 | 5.114e-1 | 60   | 76  | 78.0970    | 98.4124   | AAL93751.1  SSU ribosomal protein S17P |                         |    |    |   |   |   |   |
|         |                        |                      |          |          | 76   | 49  | 76.0000    | 68.5221   |                                        |                         |    |    |   |   |   |   |
| FN1637  |                        |                      |          |          |      | 18  |            | 23.3082   | AAL93752.1  LSU ribosomal protein L29P |                         |    |    |   |   |   |   |
|         |                        |                      |          |          |      | 57  |            | 79.7094   |                                        |                         |    |    |   |   |   |   |
| FN1638  | -3.449                 | 13.521               | 2.494e-5 | 2.24e-5  | 22   | 264 | 28.6356    | 341.8537  | AAL93753.1  LSU ribosomal protein L16P |                         |    |    |   |   |   |   |
|         |                        |                      |          |          | 37   | 268 | 37.0000    | 374.7738  |                                        |                         |    |    |   |   |   |   |
| FN1639  | -1.073                 | 18.973               | 3.058e-6 | 9.209e-7 | 355  | 778 | 462.0739   | 1007.4324 | AAL93754.1  SSU ribosomal protein S3P  |                         |    |    |   |   |   |   |
|         |                        |                      |          |          | 527  | 768 | 527.0000   | 1073.9787 |                                        |                         |    |    |   |   |   |   |
| FN1640  | -2.077                 | 12.650               | 1.394e-6 | 2.562e-7 | 30   | 128 | 39.0485    | 165.7472  | AAL93755.1  LSU ribosomal protein L22P |                         |    |    |   |   |   |   |
|         |                        |                      |          |          | 39   | 117 | 39.0000    | 163.6139  |                                        |                         |    |    |   |   |   |   |
| FN1641  | -3.818                 | 12.292               | 1.272e-4 | 2.145e-4 | 9    | 225 | 11.7145    | 291.3526  | AAL93756.1  SSU ribosomal protein S19P |                         |    |    |   |   |   |   |
|         |                        |                      |          |          | 26   | 172 | 26.0000    | 240.5265  |                                        |                         |    |    |   |   |   |   |
| FN1642  | -1.562                 | 16.848               | 1.176e-5 | 7.651e-6 | 175  | 429 | 227.7829   | 555.5122  | AAL93757.1  LSU ribosomal protein L2P  |                         |    |    |   |   |   |   |
|         |                        |                      |          |          | 172  | 447 | 172.0000   | 625.0891  |                                        |                         |    |    |   |   |   |   |
| FN1643  | -1.515                 | 11.817               | 4.153e-5 | 4.649e-5 | 30   | 78  | 39.0485    | 101.0022  | AAL93758.1  LSU ribosomal protein L23P |                         |    |    |   |   |   |   |
|         |                        |                      |          |          | 32   | 73  | 32.0000    | 102.0839  |                                        |                         |    |    |   |   |   |   |
| FN1644  | -0.267                 | 19.903               | 2.718e-4 | 5.627e-4 | 721  | 862 | 938.4655   | 1116.2040 | AAL93759.1  LSU ribosomal protein L1E  |                         |    |    |   |   |   |   |
|         |                        |                      |          |          | 867  | 755 | 867.0000   | 1055.7993 |                                        |                         |    |    |   |   |   |   |

Show detected proteins only  
 Show all proteins  
 Filter by category:

Proteins found: 1358

Enter (or paste) list of ORFs

Find ORFs

Test Cutoff

q-Value

p-Value

.005

| Signif | Direction | Applies To   |
|--------|-----------|--------------|
| yes    | +         | ratios, bars |
| no     | n/a       | bars         |
| yes    | -         | ratios, bars |
| yes    | +         | p-, q-Values |
| yes    | -         | p-, q-Values |

Dot Plots Dot Plots

Fn Summary Table

FnPg vs Fn

FnSg vs Fn

FnPgSg vs Fn

FnPgSg vs FnPg

FnSg vs FnPg

FnPgSg vs FnSg

Fn Coverage

| Protein | FnSg vs Fn             |                      |          |          | Raw    |        | Normalized |          | Description                                     | Log <sub>2</sub> Ratios |    |    |   |   |   |   |
|---------|------------------------|----------------------|----------|----------|--------|--------|------------|----------|-------------------------------------------------|-------------------------|----|----|---|---|---|---|
|         | Log <sub>2</sub> Ratio | Log <sub>2</sub> Sum | q-Value  | p-Value  | FnSg   | Fn     | FnSg       | Fn       |                                                 | -6                      | -4 | -2 | 0 | 2 | 4 | 6 |
| FN1645  | -2.777                 | 15.931               | 4.367e-5 | 5.02e-5  | 76     | 528    | 98.9229    | 683.7073 | AAL93760.1  LSU ribosomal protein L3P           |                         |    |    |   |   |   |   |
|         |                        |                      |          |          | 92     | 447    | 92.0000    | 625.0891 |                                                 |                         |    |    |   |   |   |   |
| FN1646  | -1.473                 | 14.933               | 1.283e-6 | 2.219e-7 | 84     | 223    | 109.3358   | 288.7628 | AAL93761.1  SSU ribosomal protein S10P          |                         |    |    |   |   |   |   |
|         |                        |                      |          |          | 103    | 215    | 103.0000   | 300.6581 |                                                 |                         |    |    |   |   |   |   |
| FN1647  | -1.901                 | 15.663               | 6.584e-4 | 1.755e-3 | 82     | 384    | 106.7326   | 497.2417 | AAL93762.1  Hypothetical protein                |                         |    |    |   |   |   |   |
|         |                        |                      |          |          | 129    | 274    | 129.0000   | 383.1643 |                                                 |                         |    |    |   |   |   |   |
| FN1652  | -1.609                 | 13.990               | 1.009e-6 | 1.521e-7 | 60     | 167    | 78.0970    | 216.2483 | AAL93767.1  Oligopeptide-binding protein oppA   |                         |    |    |   |   |   |   |
|         |                        |                      |          |          | 68     | 164    | 68.0000    | 229.3392 |                                                 |                         |    |    |   |   |   |   |
| FN1654  | 1.958                  | 11.991               | 2.458e-7 | 2.208e-8 | 98     | 23     | 127.5584   | 29.7827  | AAL93769.1  Hypothetical protein                |                         |    |    |   |   |   |   |
|         |                        |                      |          |          | 124    | 25     | 124.0000   | 34.9602  |                                                 |                         |    |    |   |   |   |   |
| FN1655  | 0.897                  | 14.134               | 1.694e-2 | 8.536e-2 | 96     | 74     | 124.9552   | 95.8226  | AAL93770.1  Hypothetical cytosolic protein      |                         |    |    |   |   |   |   |
|         |                        |                      |          |          | 241    | 72     | 241.0000   | 100.6855 |                                                 |                         |    |    |   |   |   |   |
| FN1657  | -2.064                 | 13.610               | 1.355e-4 | 2.341e-4 | 41     | 188    | 53.3663    | 243.4412 | AAL93772.1  SSU ribosomal protein S6P           |                         |    |    |   |   |   |   |
|         |                        |                      |          |          | 56     | 153    | 56.0000    | 213.9567 |                                                 |                         |    |    |   |   |   |   |
| FN1658  | -0.854                 | 14.776               | 4.036e-4 | 9.329e-4 | 90     | 188    | 117.1455   | 243.4412 | AAL93773.1  Prolyl-tRNA synthetase              |                         |    |    |   |   |   |   |
|         |                        |                      |          |          | 132    | 148    | 132.0000   | 206.9646 |                                                 |                         |    |    |   |   |   |   |
| FN1660  | -0.162                 | 4.806                |          |          |        |        |            |          | AAL93775.1  ATP-dependent DNA helicase recG     |                         |    |    |   |   |   |   |
|         |                        |                      | 5        | 4        | 5.0000 | 5.5936 |            |          |                                                 |                         |    |    |   |   |   |   |
| FN1661  | -1.264                 | 10.098               | 4.791e-3 | 1.971e-2 | 19     | 49     | 24.7307    | 63.4501  | AAL93776.1  Hypothetical cytosolic protein      |                         |    |    |   |   |   |   |
|         |                        |                      |          |          | 18     | 28     | 18.0000    | 39.1555  |                                                 |                         |    |    |   |   |   |   |
| FN1662  | -0.007                 | 10.895               | 1.503e-1 | 9.397e-1 | 30     | 33     | 39.0485    | 42.7317  | AAL93777.1  Hypothetical protein                |                         |    |    |   |   |   |   |
|         |                        |                      |          |          | 48     | 32     | 48.0000    | 44.7491  |                                                 |                         |    |    |   |   |   |   |
| FN1663  | -0.316                 | 7.033                | 5.836e-2 | 3.294e-1 | 5      | 10     | 6.5081     | 12.9490  | AAL93778.1  Hypothetical protein                |                         |    |    |   |   |   |   |
|         |                        |                      |          |          | 14     | 9      | 14.0000    | 12.5857  |                                                 |                         |    |    |   |   |   |   |
| FN1666  |                        |                      |          |          |        |        |            |          | AAL93781.1  Hypothetical protein                |                         |    |    |   |   |   |   |
|         |                        |                      |          |          |        | 3      |            | 4.1952   |                                                 |                         |    |    |   |   |   |   |
| FN1667  |                        |                      |          |          |        |        |            |          | AAL93782.1  dTDP-glucose 4,6-dehydratase        |                         |    |    |   |   |   |   |
|         |                        |                      |          |          | 3      |        | 3.0000     |          |                                                 |                         |    |    |   |   |   |   |
| FN1668  |                        |                      |          |          |        |        |            |          | AAL93783.1  Cholinephosphate cytidyltransferase |                         |    |    |   |   |   |   |
|         |                        |                      |          |          | 3      |        | 3.0000     |          |                                                 |                         |    |    |   |   |   |   |
| FN1670  | -1.179                 | 11.194               | 6.02e-5  | 7.896e-5 | 21     | 52     | 27.3339    | 67.3348  | AAL93785.1  Choline kinase                      |                         |    |    |   |   |   |   |
|         |                        |                      |          |          | 37     | 56     | 37.0000    | 78.3109  |                                                 |                         |    |    |   |   |   |   |

Show detected proteins only  
 Show all proteins  
 Filter by category:

Proteins found:  
1358

Test Cutoff

| Signif | Direction | Applies To   |
|--------|-----------|--------------|
| yes    | +         | ratios, bars |
| no     | n/a       | bars         |
| yes    | -         | ratios, bars |
| yes    | +         | p-, q-Values |
| yes    | -         | p-, q-Values |

Fn Summary Table FnPg vs Fn FnSg vs Fn FnPgSg vs Fn FnPgSg vs FnPg FnSg vs FnPg FnPgSg vs FnSg Fn Coverage

| Protein | FnSg vs Fn             |                      |          |          | Raw  |     |          |          | Normalized |    |      |    | Description | Log <sub>2</sub> Ratios |    |    |   |   |   |   |
|---------|------------------------|----------------------|----------|----------|------|-----|----------|----------|------------|----|------|----|-------------|-------------------------|----|----|---|---|---|---|
|         | Log <sub>2</sub> Ratio | Log <sub>2</sub> Sum | q-Value  | p-Value  | FnSg | Fn  | FnSg     | Fn       | FnSg       | Fn | FnSg | Fn |             | -6                      | -4 | -2 | 0 | 2 | 4 | 6 |
| FN1671  |                        |                      |          |          |      | 5   |          | 6.4745   |            |    |      |    |             |                         |    |    |   |   |   |   |
|         |                        |                      |          |          |      | 4   |          | 5.5936   |            |    |      |    |             |                         |    |    |   |   |   |   |
| FN1676  |                        |                      |          |          |      |     |          |          |            |    |      |    |             |                         |    |    |   |   |   |   |
|         |                        |                      |          |          | 3    |     | 3.0000   |          |            |    |      |    |             |                         |    |    |   |   |   |   |
| FN1679  | 0.683                  | 17.706               | 1.196e-4 | 1.972e-4 | 423  | 258 | 550.5838 | 334.0843 |            |    |      |    |             |                         |    |    |   |   |   |   |
|         |                        |                      |          |          | 621  | 283 | 621.0000 | 395.7499 |            |    |      |    |             |                         |    |    |   |   |   |   |
| FN1683  | -1.444                 | 12.543               | 3.667e-5 | 3.829e-5 | 42   | 91  | 54.6679  | 117.8359 |            |    |      |    |             |                         |    |    |   |   |   |   |
|         |                        |                      |          |          | 39   | 98  | 39.0000  | 137.0442 |            |    |      |    |             |                         |    |    |   |   |   |   |
| FN1684  | -0.478                 | 16.316               | 1.065e-2 | 5.019e-2 | 146  | 257 | 190.0360 | 332.7894 |            |    |      |    |             |                         |    |    |   |   |   |   |
|         |                        |                      |          |          | 294  | 244 | 294.0000 | 341.2120 |            |    |      |    |             |                         |    |    |   |   |   |   |
| FN1685  | -0.582                 | 12.102               | 5.844e-3 | 2.477e-2 | 41   | 54  | 53.3663  | 69.9246  |            |    |      |    |             |                         |    |    |   |   |   |   |
|         |                        |                      |          |          | 55   | 66  | 55.0000  | 92.2950  |            |    |      |    |             |                         |    |    |   |   |   |   |
| FN1686  | 0.013                  | 15.829               | 1.43e-1  | 8.869e-1 | 168  | 182 | 218.6716 | 235.6718 |            |    |      |    |             |                         |    |    |   |   |   |   |
|         |                        |                      |          |          | 266  | 175 | 266.0000 | 244.7217 |            |    |      |    |             |                         |    |    |   |   |   |   |
| FN1687  | -0.434                 | 15.507               | 1.237e-2 | 5.971e-2 | 117  | 221 | 152.2891 | 286.1730 |            |    |      |    |             |                         |    |    |   |   |   |   |
|         |                        |                      |          |          | 219  | 154 | 219.0000 | 215.3551 |            |    |      |    |             |                         |    |    |   |   |   |   |
| FN1688  | -0.403                 | 11.523               | 5.263e-3 | 2.194e-2 | 31   | 51  | 40.3501  | 66.0399  |            |    |      |    |             |                         |    |    |   |   |   |   |
|         |                        |                      |          |          | 54   | 42  | 54.0000  | 58.7332  |            |    |      |    |             |                         |    |    |   |   |   |   |
| FN1689  | -1.273                 | 17.395               | 6.858e-6 | 3.251e-6 | 226  | 484 | 294.1653 | 626.7317 |            |    |      |    |             |                         |    |    |   |   |   |   |
|         |                        |                      |          |          | 240  | 475 | 240.0000 | 664.2446 |            |    |      |    |             |                         |    |    |   |   |   |   |
| FN1690  | -0.929                 | 11.719               | 4.889e-4 | 1.191e-3 | 27   | 60  | 35.1436  | 77.6940  |            |    |      |    |             |                         |    |    |   |   |   |   |
|         |                        |                      |          |          | 49   | 59  | 49.0000  | 82.5062  |            |    |      |    |             |                         |    |    |   |   |   |   |
| FN1692  | -0.777                 | 12.069               | 4.528e-4 | 1.079e-3 | 37   | 71  | 48.1598  | 91.9379  |            |    |      |    |             |                         |    |    |   |   |   |   |
|         |                        |                      |          |          | 52   | 57  | 52.0000  | 79.7094  |            |    |      |    |             |                         |    |    |   |   |   |   |
| FN1693  | -0.842                 | 7.929                | 1.27e-3  | 3.976e-3 | 11   | 15  | 14.3178  | 19.4235  |            |    |      |    |             |                         |    |    |   |   |   |   |
|         |                        |                      |          |          | 9    | 16  | 9.0000   | 22.3746  |            |    |      |    |             |                         |    |    |   |   |   |   |
| FN1694  | -1.700                 | 12.483               | 1.062e-5 | 6.429e-6 | 33   | 108 | 42.9533  | 139.8492 |            |    |      |    |             |                         |    |    |   |   |   |   |
|         |                        |                      |          |          | 41   | 95  | 41.0000  | 132.8489 |            |    |      |    |             |                         |    |    |   |   |   |   |
| FN1695  | -0.820                 | 9.444                | 1.831e-3 | 6.132e-3 | 19   | 25  | 24.7307  | 32.3725  |            |    |      |    |             |                         |    |    |   |   |   |   |
|         |                        |                      |          |          | 15   | 27  | 15.0000  | 37.7571  |            |    |      |    |             |                         |    |    |   |   |   |   |
| FN1696  | 0.243                  | 15.439               | 1.068e-2 | 5.038e-2 | 161  | 147 | 209.5603 | 190.3503 |            |    |      |    |             |                         |    |    |   |   |   |   |
|         |                        |                      |          |          | 249  | 141 | 249.0000 | 197.1758 |            |    |      |    |             |                         |    |    |   |   |   |   |

Show detected proteins only  
 Show all proteins  
 Filter by category:

Proteins found: 1358

Test Cutoff

| Signif | Direction | Applies To   |
|--------|-----------|--------------|
| yes    | +         | ratios, bars |
| no     | n/a       | bars         |
| yes    | -         | ratios, bars |
| yes    | +         | p-, q-Values |
| yes    | -         |              |

Fn Summary Table FnPg vs Fn FnSg vs Fn FnPgSg vs Fn FnPgSg vs FnPg FnSg vs FnPg FnPgSg vs FnSg Fn Coverage

| Protein | FnSg vs Fn             |                      |          |          | Raw  |     |          |          | Normalized |    |      |    | Description | Log <sub>2</sub> Ratios |    |    |   |   |   |   |  |
|---------|------------------------|----------------------|----------|----------|------|-----|----------|----------|------------|----|------|----|-------------|-------------------------|----|----|---|---|---|---|--|
|         | Log <sub>2</sub> Ratio | Log <sub>2</sub> Sum | q-Value  | p-Value  | FnSg | Fn  | FnSg     | Fn       | FnSg       | Fn | FnSg | Fn |             | -6                      | -4 | -2 | 0 | 2 | 4 | 6 |  |
| FN1697  | -0.736                 | 14.540               | 1.497e-3 | 4.847e-3 | 100  | 136 | 130.1617 | 176.1064 |            |    |      |    |             |                         |    |    |   |   |   |   |  |
|         |                        |                      |          |          | 109  | 159 | 109.0000 | 222.3471 |            |    |      |    |             |                         |    |    |   |   |   |   |  |
| FN1698  | 1.236                  | 14.573               | 1.44e-4  | 2.542e-4 | 183  | 88  | 238.1958 | 113.9512 |            |    |      |    |             |                         |    |    |   |   |   |   |  |
|         |                        |                      |          |          | 241  | 64  | 241.0000 | 89.4982  |            |    |      |    |             |                         |    |    |   |   |   |   |  |
| FN1700  | -1.688                 | 5.619                |          |          | 3    |     | 3.9048   |          |            |    |      |    |             |                         |    |    |   |   |   |   |  |
|         |                        |                      |          |          |      | 9   |          | 12.5857  |            |    |      |    |             |                         |    |    |   |   |   |   |  |
| FN1701  | -0.217                 | 12.200               | 1.37e-2  | 6.722e-2 | 44   | 57  | 57.2711  | 73.8093  |            |    |      |    |             |                         |    |    |   |   |   |   |  |
|         |                        |                      |          |          | 70   | 53  | 70.0000  | 74.1157  |            |    |      |    |             |                         |    |    |   |   |   |   |  |
| FN1703  | -0.011                 | 14.808               | 1.465e-1 | 9.123e-1 | 144  | 133 | 187.4328 | 172.2217 |            |    |      |    |             |                         |    |    |   |   |   |   |  |
|         |                        |                      |          |          | 150  | 120 | 150.0000 | 167.8092 |            |    |      |    |             |                         |    |    |   |   |   |   |  |
| FN1704  | -0.812                 | 8.215                | 4.075e-5 | 4.509e-5 | 10   | 18  | 13.0162  | 23.3082  |            |    |      |    |             |                         |    |    |   |   |   |   |  |
|         |                        |                      |          |          | 13   | 16  | 13.0000  | 22.3746  |            |    |      |    |             |                         |    |    |   |   |   |   |  |
| FN1707  |                        |                      |          |          |      | 7   |          | 9.0643   |            |    |      |    |             |                         |    |    |   |   |   |   |  |
|         |                        |                      |          |          |      | 4   |          | 5.5936   |            |    |      |    |             |                         |    |    |   |   |   |   |  |
| FN1708  | -0.649                 | 18.681               | 3.79e-7  | 4.189e-8 | 406  | 634 | 528.4563 | 820.9668 |            |    |      |    |             |                         |    |    |   |   |   |   |  |
|         |                        |                      |          |          | 507  | 574 | 507.0000 | 802.6872 |            |    |      |    |             |                         |    |    |   |   |   |   |  |
| FN1711  |                        |                      |          |          |      | 14  |          | 18.1286  |            |    |      |    |             |                         |    |    |   |   |   |   |  |
|         |                        |                      |          |          |      | 12  |          | 16.7809  |            |    |      |    |             |                         |    |    |   |   |   |   |  |
| FN1713  | 1.188                  | 7.325                |          |          | 14   |     | 18.2226  |          |            |    |      |    |             |                         |    |    |   |   |   |   |  |
|         |                        |                      |          |          | 20   | 6   | 20.0000  | 8.3905   |            |    |      |    |             |                         |    |    |   |   |   |   |  |
| FN1715  |                        |                      |          |          | 9    |     | 11.7145  |          |            |    |      |    |             |                         |    |    |   |   |   |   |  |
|         |                        |                      |          |          | 9    |     | 9.0000   |          |            |    |      |    |             |                         |    |    |   |   |   |   |  |
| FN1716  |                        |                      |          |          |      |     |          |          |            |    |      |    |             |                         |    |    |   |   |   |   |  |
|         |                        |                      |          |          | 5    |     | 5.0000   |          |            |    |      |    |             |                         |    |    |   |   |   |   |  |
| FN1717  | -2.513                 | 10.140               | 1.731e-5 | 1.326e-5 | 7    | 57  | 9.1113   | 73.8093  |            |    |      |    |             |                         |    |    |   |   |   |   |  |
|         |                        |                      |          |          | 19   | 62  | 19.0000  | 86.7014  |            |    |      |    |             |                         |    |    |   |   |   |   |  |
| FN1718  | -1.084                 | 18.165               | 3.61e-4  | 8.134e-4 | 284  | 569 | 369.6591 | 736.7982 |            |    |      |    |             |                         |    |    |   |   |   |   |  |
|         |                        |                      |          |          | 375  | 602 | 375.0000 | 841.8426 |            |    |      |    |             |                         |    |    |   |   |   |   |  |
| FN1719  | -0.008                 | 17.678               | 1.521e-1 | 9.536e-1 | 405  | 341 | 527.1547 | 441.5610 |            |    |      |    |             |                         |    |    |   |   |   |   |  |
|         |                        |                      |          |          | 386  | 341 | 386.0000 | 476.8577 |            |    |      |    |             |                         |    |    |   |   |   |   |  |
| FN1722  | -0.891                 | 4.856                | 9.382e-3 | 4.335e-2 | 3    | 7   | 3.9048   | 9.0643   |            |    |      |    |             |                         |    |    |   |   |   |   |  |
|         |                        |                      |          |          | 4    | 4   | 4.0000   | 5.5936   |            |    |      |    |             |                         |    |    |   |   |   |   |  |

Show detected proteins only  
 Show all proteins  
 Filter by category:

Proteins found:  
1358

Enter (or paste) list of ORFs

Test Cutoff

| Signif | Direction | Applies To   |
|--------|-----------|--------------|
| yes    | +         | ratios, bars |
| no     | n/a       | bars         |
| yes    | -         | ratios, bars |
| yes    | +         | p-, q-Values |
| yes    | -         | p-, q-Values |

Fn Summary Table

FnPg vs Fn

FnSg vs Fn

FnPgSg vs Fn

FnPgSg vs FnPg

FnSg vs FnPg

FnPgSg vs FnSg

Fn Coverage

| Protein | FnSg vs Fn             |                      |          |          | Raw  |     | Normalized |          | Description                                          | Log <sub>2</sub> Ratios |    |    |   |   |   |   |
|---------|------------------------|----------------------|----------|----------|------|-----|------------|----------|------------------------------------------------------|-------------------------|----|----|---|---|---|---|
|         | Log <sub>2</sub> Ratio | Log <sub>2</sub> Sum | q-Value  | p-Value  | FnSg | Fn  | FnSg       | Fn       |                                                      | -6                      | -4 | -2 | 0 | 2 | 4 | 6 |
| FN1723  | -0.775                 | 13.186               | 1.12e-3  | 3.41e-3  | 65   | 86  | 84.6051    | 111.3614 | AAL93838.1   Glucose inhibited division protein A    |                         |    |    |   |   |   |   |
|         |                        |                      |          |          | 63   | 101 | 63.0000    | 141.2394 |                                                      |                         |    |    |   |   |   |   |
| FN1724  | 1.009                  | 8.673                |          |          | 11   | 11  | 14.3178    | 14.2439  | AAL93839.1   Potassium uptake protein KtrA           |                         |    |    |   |   |   |   |
|         |                        |                      |          |          | 43   |     | 43.0000    |          |                                                      |                         |    |    |   |   |   |   |
| FN1727  |                        |                      |          |          | 5    |     | 6.5081     |          | AAL93842.1   Chloride channel protein                |                         |    |    |   |   |   |   |
|         |                        |                      |          |          |      |     |            |          |                                                      |                         |    |    |   |   |   |   |
| FN1728  | -1.320                 | 7.878                | 3.995e-6 | 1.353e-6 | 8    | 18  | 10.4129    | 23.3082  | AAL93843.1   Pyrrolidone-carboxylate peptidase       |                         |    |    |   |   |   |   |
|         |                        |                      |          |          | 9    | 18  | 9.0000     | 25.1714  |                                                      |                         |    |    |   |   |   |   |
| FN1730  | 0.233                  | 9.170                | 2.828e-3 | 1.042e-2 | 20   | 18  | 26.0323    | 23.3082  | AAL93845.1   Para-aminobenzoate synthase component I |                         |    |    |   |   |   |   |
|         |                        |                      |          |          | 26   | 15  | 26.0000    | 20.9761  |                                                      |                         |    |    |   |   |   |   |
| FN1731  |                        |                      |          |          | 6    |     | 7.8097     |          | AAL93846.1   Anthranilate synthase component II      |                         |    |    |   |   |   |   |
|         |                        |                      |          |          | 6    |     | 6.0000     |          |                                                      |                         |    |    |   |   |   |   |
| FN1732  | 1.181                  | 10.736               | 1.07e-3  | 3.228e-3 | 41   | 24  | 53.3663    | 31.0776  | AAL93847.1   Hypothetical protein                    |                         |    |    |   |   |   |   |
|         |                        |                      |          |          | 71   | 17  | 71.0000    | 23.7730  |                                                      |                         |    |    |   |   |   |   |
| FN1733  |                        |                      |          |          | 9    |     | 11.7145    |          | AAL93848.1   V-type sodium ATP synthase subunit D    |                         |    |    |   |   |   |   |
|         |                        |                      |          |          | 22   |     | 22.0000    |          |                                                      |                         |    |    |   |   |   |   |
| FN1734  | 0.735                  | 14.394               | 8.88e-5  | 1.348e-4 | 151  | 86  | 196.5441   | 111.3614 | AAL93849.1   V-type sodium ATP synthase subunit B    |                         |    |    |   |   |   |   |
|         |                        |                      |          |          | 182  | 83  | 182.0000   | 116.0680 |                                                      |                         |    |    |   |   |   |   |
| FN1735  | 1.703                  | 13.940               | 3.393e-5 | 3.414e-5 | 184  | 49  | 239.4974   | 63.4501  | AAL93850.1   V-type sodium ATP synthase subunit A    |                         |    |    |   |   |   |   |
|         |                        |                      |          |          | 213  | 54  | 213.0000   | 75.5141  |                                                      |                         |    |    |   |   |   |   |
| FN1736  | 1.958                  | 9.725                | 3.525e-5 | 3.611e-5 | 42   | 12  | 54.6679    | 15.5388  | AAL93851.1   V-type sodium ATP synthase subunit A    |                         |    |    |   |   |   |   |
|         |                        |                      |          |          | 60   | 10  | 60.0000    | 13.9841  |                                                      |                         |    |    |   |   |   |   |
| FN1737  | 0.730                  | 7.235                | 8.316e-3 | 3.755e-2 | 12   | 5   | 15.6194    | 6.4745   | AAL93852.1   V-type sodium ATP synthase subunit G    |                         |    |    |   |   |   |   |
|         |                        |                      |          |          | 16   | 9   | 16.0000    | 12.5857  |                                                      |                         |    |    |   |   |   |   |
| FN1738  | 1.818                  | 11.075               | 9.609e-5 | 1.487e-4 | 61   | 22  | 79.3986    | 28.4878  | AAL93853.1   V-type sodium ATP synthase subunit C    |                         |    |    |   |   |   |   |
|         |                        |                      |          |          | 95   | 15  | 95.0000    | 20.9761  |                                                      |                         |    |    |   |   |   |   |
| FN1739  | -0.103                 | 5.508                |          |          | 5    |     | 6.5081     |          | AAL93854.1   V-type sodium ATP synthase subunit E    |                         |    |    |   |   |   |   |
|         |                        |                      |          |          |      | 5   |            | 6.9920   |                                                      |                         |    |    |   |   |   |   |
| FN1740  |                        |                      |          |          |      |     |            |          | AAL93855.1   V-type sodium ATP synthase subunit K    |                         |    |    |   |   |   |   |
|         |                        |                      |          |          | 114  |     | 114.0000   |          |                                                      |                         |    |    |   |   |   |   |
| FN1741  | 0.833                  | 9.603                | 2.926e-5 | 2.772e-5 | 28   | 15  | 36.4453    | 19.4235  | AAL93856.1   V-type sodium ATP synthase subunit I    |                         |    |    |   |   |   |   |
|         |                        |                      |          |          | 38   | 16  | 38.0000    | 22.3746  |                                                      |                         |    |    |   |   |   |   |

Show detected proteins only  
 Show all proteins  
 Filter by category:

Proteins found: 1358

Test Cutoff

| Signif | Direction | Applies To   |
|--------|-----------|--------------|
| yes    | +         | ratios, bars |
| no     | n/a       | bars         |
| yes    | -         | ratios, bars |
| yes    | +         | p-, q-Values |
| yes    | -         | p-, q-Values |

Fn Summary Table

FnPg vs Fn

FnSg vs Fn

FnPgSg vs Fn

FnPgSg vs FnPg

FnSg vs FnPg

FnPgSg vs FnSg

Fn Coverage

| Protein | FnSg vs Fn             |                      |          |          | Raw  |      | Normalized |           | Description                                                      | Log <sub>2</sub> Ratios |    |    |   |   |
|---------|------------------------|----------------------|----------|----------|------|------|------------|-----------|------------------------------------------------------------------|-------------------------|----|----|---|---|
|         | Log <sub>2</sub> Ratio | Log <sub>2</sub> Sum | q-Value  | p-Value  | FnSg | Fn   | FnSg       | Fn        |                                                                  | -6                      | -4 | -2 | 0 | 2 |
| FN1745  | 2.001                  | 7.212                | 1.028e-5 | 6.096e-6 | 19   | 4    | 24.7307    | 5.1796    | AAL93860.1  Cystathionine gamma-synthase                         |                         |    |    |   |   |
|         |                        |                      |          |          | 24   | 5    | 24.0000    | 6.9920    |                                                                  |                         |    |    |   |   |
| FN1746  |                        |                      |          |          | 8    |      | 10.4129    |           | AAL93861.1  Cystathionine beta-lyase                             |                         |    |    |   |   |
|         |                        |                      |          |          | 15   |      | 15.0000    |           |                                                                  |                         |    |    |   |   |
| FN1762  |                        |                      |          |          | 4    |      | 5.2065     |           | AAL93875.1  Protein yaaA                                         |                         |    |    |   |   |
|         |                        |                      |          |          |      |      |            |           |                                                                  |                         |    |    |   |   |
| FN1763  | 2.008                  | 10.242               | 9.797e-6 | 5.649e-6 | 55   | 16   | 71.5889    | 20.7184   | AAL93876.1  Hypothetical cytosolic protein                       |                         |    |    |   |   |
|         |                        |                      |          |          | 68   | 10   | 68.0000    | 13.9841   |                                                                  |                         |    |    |   |   |
| FN1764  | 0.963                  | 24.808               | 9.803e-6 | 5.654e-6 | 5881 | 3002 | 7654.8070  | 3887.2905 | AAL93877.1  Enolase                                              |                         |    |    |   |   |
|         |                        |                      |          |          | 7477 | 2773 | 7477.0000  | 3877.7901 |                                                                  |                         |    |    |   |   |
| FN1765  | -0.922                 | 19.718               | 1.549e-4 | 2.812e-4 | 535  | 933  | 696.3649   | 1208.1419 | AAL93878.1  Pyruvate kinase                                      |                         |    |    |   |   |
|         |                        |                      |          |          | 653  | 964  | 653.0000   | 1348.0670 |                                                                  |                         |    |    |   |   |
| FN1780  | -1.274                 | 8.859                | 6.736e-5 | 9.32e-5  | 9    | 28   | 11.7145    | 36.2572   | AAL93879.1  Hypothetical protein                                 |                         |    |    |   |   |
|         |                        |                      |          |          | 16   | 22   | 16.0000    | 30.7650   |                                                                  |                         |    |    |   |   |
| FN1781  | -0.665                 | 18.753               | 7.157e-5 | 1.022e-4 | 374  | 666  | 486.8046   | 862.4036  | AAL93880.1  LytB protein                                         |                         |    |    |   |   |
|         |                        |                      |          |          | 569  | 580  | 569.0000   | 811.0776  |                                                                  |                         |    |    |   |   |
| FN1783  |                        |                      |          |          |      |      |            |           | AAL93882.1  Ethanolamine utilization protein eutJ                |                         |    |    |   |   |
|         |                        |                      |          |          | 8    |      | 8.0000     |           |                                                                  |                         |    |    |   |   |
| FN1784  | -0.466                 | 9.445                | 1.392e-2 | 6.853e-2 | 13   | 22   | 16.9210    | 28.4878   | AAL93883.1  unknown                                              |                         |    |    |   |   |
|         |                        |                      |          |          | 28   | 24   | 28.0000    | 33.5618   |                                                                  |                         |    |    |   |   |
| FN1785  | -1.124                 | 8.804                |          |          | 11   | 32   | 14.3178    | 41.4368   | AAL93884.1  Hypothetical protein                                 |                         |    |    |   |   |
|         |                        |                      |          |          |      | 15   |            | 20.9761   |                                                                  |                         |    |    |   |   |
| FN1786  | -0.867                 | 11.781               | 8.295e-6 | 4.353e-6 | 36   | 60   | 46.8582    | 77.6940   | AAL93885.1  ADP-heptose synthase                                 |                         |    |    |   |   |
|         |                        |                      |          |          | 41   | 59   | 41.0000    | 82.5062   |                                                                  |                         |    |    |   |   |
| FN1787  | -2.366                 | 10.179               |          |          |      | 60   |            | 77.6940   | AAL93886.1  Tetratricopeptide repeat family protein              |                         |    |    |   |   |
|         |                        |                      |          |          | 15   | 55   | 15.0000    | 76.9125   |                                                                  |                         |    |    |   |   |
| FN1788  | -0.505                 | 8.757                | 3.007e-3 | 1.126e-2 | 13   | 21   | 16.9210    | 27.1929   | AAL93887.1  2C-methyl-D-erythritol 2,4-cyclodiphosphate synthase |                         |    |    |   |   |
|         |                        |                      |          |          | 18   | 16   | 18.0000    | 22.3746   |                                                                  |                         |    |    |   |   |
| FN1790  | 3.530                  | 7.668                |          |          | 23   |      | 29.9372    |           | AAL93889.1  Cob(I)alamin adenosyltransferase                     |                         |    |    |   |   |
|         |                        |                      |          |          | 67   | 3    | 67.0000    | 4.1952    |                                                                  |                         |    |    |   |   |
| FN1791  |                        |                      |          |          | 3    |      | 3.9048     |           | AAL93890.1  Mutator MutT protein                                 |                         |    |    |   |   |
|         |                        |                      |          |          | 5    |      | 5.0000     |           |                                                                  |                         |    |    |   |   |

Show detected proteins only

Show all proteins

Filter by category:

GO: amino acid transport

Proteins found: 1358

Enter (or paste) list of ORFs

Find ORFs

Test Cutoff

q-Value

p-Value

.005

| Signif      | Direction | Applies To |
|-------------|-----------|------------|
| red         | yes       | +          |
| yellow      | no        | n/a        |
| green       | yes       | -          |
| pink        | yes       | +          |
| light green | yes       | -          |

Applies To: ratios, bars

Applies To: ratios, bars

Applies To: p-, q-Values

Dot Plots

Dot Plots



Fn Summary Table FnPg vs Fn FnSg vs Fn FnPgSg vs Fn FnPgSg vs FnPg FnSg vs FnPg FnPgSg vs FnSg Fn Coverage

| Protein | FnSg vs Fn             |                      |          |          | Raw  |      |           |           | Normalized |    |      |    | Description | Log <sub>2</sub> Ratios |    |    |   |   |   |   |
|---------|------------------------|----------------------|----------|----------|------|------|-----------|-----------|------------|----|------|----|-------------|-------------------------|----|----|---|---|---|---|
|         | Log <sub>2</sub> Ratio | Log <sub>2</sub> Sum | q-Value  | p-Value  | FnSg | Fn   | FnSg      | Fn        | FnSg       | Fn | FnSg | Fn |             | -6                      | -4 | -2 | 0 | 2 | 4 | 6 |
| FN1792  | -0.244                 | 22.170               | 3.243e-2 | 1.745e-1 | 1257 | 1765 | 1636.1320 | 2285.4989 |            |    |      |    |             |                         |    |    |   |   |   |   |
|         |                        |                      |          |          | 2356 | 1746 | 2356.0000 | 2441.6234 |            |    |      |    |             |                         |    |    |   |   |   |   |
| FN1793  | 0.619                  | 15.293               | 1.327e-4 | 2.272e-4 | 201  | 131  | 261.6249  | 169.6319  |            |    |      |    |             |                         |    |    |   |   |   |   |
|         |                        |                      |          |          | 235  | 110  | 235.0000  | 153.8251  |            |    |      |    |             |                         |    |    |   |   |   |   |
| FN1794  | -2.139                 | 13.189               | 5.94e-5  | 7.745e-5 | 50   | 148  | 65.0808   | 191.6452  |            |    |      |    |             |                         |    |    |   |   |   |   |
|         |                        |                      |          |          | 27   | 153  | 27.0000   | 213.9567  |            |    |      |    |             |                         |    |    |   |   |   |   |
| FN1795  |                        |                      |          |          |      |      |           |           |            |    |      |    |             |                         |    |    |   |   |   |   |
|         |                        |                      |          |          | 12   |      | 12.0000   |           |            |    |      |    |             |                         |    |    |   |   |   |   |
| FN1796  | 0.194                  | 5.806                |          |          |      |      |           |           |            |    |      |    |             |                         |    |    |   |   |   |   |
|         |                        |                      |          |          | 8    | 5    | 8.0000    | 6.9920    |            |    |      |    |             |                         |    |    |   |   |   |   |
| FN1797  | -0.397                 | 12.940               | 5.661e-3 | 2.387e-2 | 68   | 74   | 88.5099   | 95.8226   |            |    |      |    |             |                         |    |    |   |   |   |   |
|         |                        |                      |          |          | 66   | 77   | 66.0000   | 107.6775  |            |    |      |    |             |                         |    |    |   |   |   |   |
| FN1798  | -1.055                 | 6.832                |          |          | 6    |      | 7.8097    |           |            |    |      |    |             |                         |    |    |   |   |   |   |
|         |                        |                      |          |          | 7    | 11   | 7.0000    | 15.3825   |            |    |      |    |             |                         |    |    |   |   |   |   |
| FN1800  | -0.041                 | 15.581               | 1.268e-1 | 7.719e-1 | 141  | 172  | 183.5279  | 222.7228  |            |    |      |    |             |                         |    |    |   |   |   |   |
|         |                        |                      |          |          | 253  | 162  | 253.0000  | 226.5424  |            |    |      |    |             |                         |    |    |   |   |   |   |
| FN1801  | 1.049                  | 8.356                |          |          | 20   |      | 26.0323   |           |            |    |      |    |             |                         |    |    |   |   |   |   |
|         |                        |                      |          |          |      | 9    |           | 12.5857   |            |    |      |    |             |                         |    |    |   |   |   |   |
| FN1803  | 0.128                  | 6.488                |          |          | 6    | 7    | 7.8097    | 9.0643    |            |    |      |    |             |                         |    |    |   |   |   |   |
|         |                        |                      |          |          | 12   |      | 12.0000   |           |            |    |      |    |             |                         |    |    |   |   |   |   |
| FN1804  | 1.168                  | 8.806                | 7.785e-3 | 3.476e-2 | 18   | 11   | 23.4291   | 14.2439   |            |    |      |    |             |                         |    |    |   |   |   |   |
|         |                        |                      |          |          | 40   | 10   | 40.0000   | 13.9841   |            |    |      |    |             |                         |    |    |   |   |   |   |
| FN1807  | -1.080                 | 16.630               | 3.196e-5 | 3.133e-5 | 186  | 348  | 242.1007  | 450.6253  |            |    |      |    |             |                         |    |    |   |   |   |   |
|         |                        |                      |          |          | 196  | 340  | 196.0000  | 475.4593  |            |    |      |    |             |                         |    |    |   |   |   |   |
| FN1808  | -4.066                 | 9.997                |          |          | 6    | 93   | 7.8097    | 120.4257  |            |    |      |    |             |                         |    |    |   |   |   |   |
|         |                        |                      |          |          |      | 101  |           | 141.2394  |            |    |      |    |             |                         |    |    |   |   |   |   |
| FN1809  | -0.448                 | 8.634                | 4.384e-2 | 2.418e-1 | 17   | 23   | 22.1275   | 29.7827   |            |    |      |    |             |                         |    |    |   |   |   |   |
|         |                        |                      |          |          | 12   | 12   | 12.0000   | 16.7809   |            |    |      |    |             |                         |    |    |   |   |   |   |
| FN1811  | -2.238                 | 10.721               | 4.003e-5 | 4.383e-5 | 16   | 73   | 20.8259   | 94.5277   |            |    |      |    |             |                         |    |    |   |   |   |   |
|         |                        |                      |          |          | 17   | 60   | 17.0000   | 83.9046   |            |    |      |    |             |                         |    |    |   |   |   |   |
| FN1812  | -2.463                 | 13.109               | 6.056e-6 | 2.629e-6 | 30   | 167  | 39.0485   | 216.2483  |            |    |      |    |             |                         |    |    |   |   |   |   |
|         |                        |                      |          |          | 41   | 161  | 41.0000   | 225.1440  |            |    |      |    |             |                         |    |    |   |   |   |   |

Show detected proteins only  
 Show all proteins  
 Filter by category:

Proteins found: 1358

Test Cutoff

| Signif | Direction | Applies To   |
|--------|-----------|--------------|
| yes    | +         | ratios, bars |
| no     | n/a       | bars         |
| yes    | -         | ratios, bars |
| yes    | +         | p-, q-Values |
| yes    | -         | p-, q-Values |

Fn Summary Table

FnPg vs Fn

FnSg vs Fn

FnPgSg vs Fn

FnPgSg vs FnPg

FnSg vs FnPg

FnPgSg vs FnSg

Fn Coverage

| Protein | FnSg vs Fn             |                      |          |          | Raw  |     | Normalized |          | Description                                           | Log <sub>2</sub> Ratios |    |    |   |   |
|---------|------------------------|----------------------|----------|----------|------|-----|------------|----------|-------------------------------------------------------|-------------------------|----|----|---|---|
|         | Log <sub>2</sub> Ratio | Log <sub>2</sub> Sum | q-Value  | p-Value  | FnSg | Fn  | FnSg       | Fn       |                                                       | -6                      | -4 | -2 | 0 | 2 |
| FN1813  | -2.467                 | 8.610                | 4.626e-5 | 5.489e-5 | 6    | 34  | 7.8097     | 44.0266  | AAL93912.1  Manganese-binding protein                 |                         |    |    |   |   |
|         |                        |                      |          |          | 9    | 35  | 9.0000     | 48.9443  |                                                       |                         |    |    |   |   |
| FN1814  | -1.854                 | 8.615                |          |          | 8    | 29  | 10.4129    | 37.5521  | AAL93913.1  Hypothetical protein                      |                         |    |    |   |   |
|         |                        |                      |          |          |      | 27  |            | 37.7571  |                                                       |                         |    |    |   |   |
| FN1816  | 1.563                  | 8.052                |          |          |      | 6   |            | 7.7694   | AAL93915.1  unknown                                   |                         |    |    |   |   |
|         |                        |                      |          |          | 28   | 8   | 28.0000    | 11.1873  |                                                       |                         |    |    |   |   |
| FN1817  | -0.484                 | 5.654                |          |          |      |     |            |          | AAL93916.1  Hemolysin                                 |                         |    |    |   |   |
|         |                        |                      |          |          | 6    | 6   | 6.0000     | 8.3905   |                                                       |                         |    |    |   |   |
| FN1819  |                        |                      |          |          |      | 8   |            | 10.3592  | AAL93918.1  Export ABC transporter                    |                         |    |    |   |   |
|         |                        |                      |          |          |      | 12  |            | 16.7809  |                                                       |                         |    |    |   |   |
| FN1820  |                        |                      |          |          |      | 8   |            | 10.3592  | AAL93919.1  Export ABC transporter                    |                         |    |    |   |   |
|         |                        |                      |          |          |      | 6   |            | 8.3905   |                                                       |                         |    |    |   |   |
| FN1822  |                        |                      |          |          |      | 16  |            | 20.7184  | AAL93921.1  Flavodoxin                                |                         |    |    |   |   |
|         |                        |                      |          |          |      | 10  |            | 13.9841  |                                                       |                         |    |    |   |   |
| FN1826  | -1.115                 | 11.313               | 5.451e-4 | 1.375e-3 | 25   | 52  | 32.5404    | 67.3348  | AAL93925.1  Protease                                  |                         |    |    |   |   |
|         |                        |                      |          |          | 36   | 58  | 36.0000    | 81.1078  |                                                       |                         |    |    |   |   |
| FN1827  | 0.562                  | 12.697               | 3.596e-3 | 1.412e-2 | 83   | 42  | 108.0342   | 54.3858  | AAL93926.1  Replicative DNA helicase                  |                         |    |    |   |   |
|         |                        |                      |          |          | 90   | 57  | 90.0000    | 79.7094  |                                                       |                         |    |    |   |   |
| FN1828  | -1.611                 | 11.985               | 1.875e-4 | 3.539e-4 | 26   | 79  | 33.8420    | 102.2971 | AAL93927.1  LSU ribosomal protein L9P                 |                         |    |    |   |   |
|         |                        |                      |          |          | 39   | 86  | 39.0000    | 120.2632 |                                                       |                         |    |    |   |   |
| FN1830  | 0.831                  | 10.973               | 7.067e-3 | 3.105e-2 | 55   | 26  | 71.5889    | 33.6674  | AAL93929.1  DNA polymerase III subunits gamma and tau |                         |    |    |   |   |
|         |                        |                      |          |          | 48   | 24  | 48.0000    | 33.5618  |                                                       |                         |    |    |   |   |
| FN1831  | 0.765                  | 13.132               | 3.158e-6 | 9.818e-7 | 93   | 55  | 121.0503   | 71.2195  | AAL93930.1  Nitrogen assimilation regulatory protein  |                         |    |    |   |   |
|         |                        |                      |          |          | 126  | 53  | 126.0000   | 74.1157  |                                                       |                         |    |    |   |   |
| FN1832  |                        |                      |          |          | 6    |     | 7.8097     |          | AAL93931.1  TonB protein                              |                         |    |    |   |   |
|         |                        |                      |          |          |      |     |            |          |                                                       |                         |    |    |   |   |
| FN1834  | -1.470                 | 10.736               | 1.335e-5 | 9.22e-6  | 22   | 50  | 28.6356    | 64.7450  | AAL93933.1  Biopolymer transport exbB protein         |                         |    |    |   |   |
|         |                        |                      |          |          | 21   | 52  | 21.0000    | 72.7173  |                                                       |                         |    |    |   |   |
| FN1836  | -1.081                 | 12.848               | 2.971e-5 | 2.831e-5 | 40   | 100 | 52.0647    | 129.4900 | AAL93935.1  Tetratricopeptide repeat family protein   |                         |    |    |   |   |
|         |                        |                      |          |          | 66   | 86  | 66.0000    | 120.2632 |                                                       |                         |    |    |   |   |
| FN1839  | 2.490                  | 17.447               | 1.467e-3 | 4.729e-3 | 914  | 135 | 1189.6775  | 174.8115 | AAL93938.1  Glycerol kinase                           |                         |    |    |   |   |
|         |                        |                      |          |          | 814  | 130 | 814.0000   | 181.7933 |                                                       |                         |    |    |   |   |

Show detected proteins only  
 Show all proteins  
 Filter by category:

Proteins found: 1358

Enter (or paste) list of ORFs

Find ORFs

Test Cutoff

q-Value .005

p-Value

| Signif | Direction | Applies To   |
|--------|-----------|--------------|
| yes    | +         | ratios, bars |
| no     | n/a       | bars         |
| yes    | -         | ratios, bars |
| yes    | +         | p-, q-Values |
| yes    | -         |              |

Dot Plots  Dot Plots

Fn Summary Table

FnPg vs Fn

FnSg vs Fn

FnPgSg vs Fn

FnPgSg vs FnPg

FnSg vs FnPg

FnPgSg vs FnSg

Fn Coverage

| Protein | FnSg vs Fn             |                      |          |          | Raw   |      | Normalized |           | Description                                                       | Log <sub>2</sub> Ratios |    |    |   |   |   |   |
|---------|------------------------|----------------------|----------|----------|-------|------|------------|-----------|-------------------------------------------------------------------|-------------------------|----|----|---|---|---|---|
|         | Log <sub>2</sub> Ratio | Log <sub>2</sub> Sum | q-Value  | p-Value  | FnSg  | Fn   | FnSg       | Fn        |                                                                   | -6                      | -4 | -2 | 0 | 2 | 4 | 6 |
| FN1840  | 1.229                  | 11.257               | 8.826e-6 | 4.817e-6 | 58    | 24   | 75.4938    | 31.0776   | AAL93939.1  Dihydroxyacetone kinase                               |                         |    |    |   |   |   |   |
|         |                        |                      |          |          | 76    | 24   | 76.0000    | 33.5618   |                                                                   |                         |    |    |   |   |   |   |
| FN1841  | -1.358                 | 8.103                | 9.292e-3 | 4.284e-2 | 9     | 14   | 11.7145    | 18.1286   | AAL93940.1  Dihydroxyacetone kinase                               |                         |    |    |   |   |   |   |
|         |                        |                      |          |          | 9     | 25   | 9.0000     | 34.9602   |                                                                   |                         |    |    |   |   |   |   |
| FN1842  | 0.002                  | 9.721                | 1.576e-1 | 9.943e-1 | 17    | 20   | 22.1275    | 25.8980   | AAL93941.1  Dihydroxyacetone kinase phosphotransfer protein       |                         |    |    |   |   |   |   |
|         |                        |                      |          |          | 36    | 23   | 36.0000    | 32.1634   |                                                                   |                         |    |    |   |   |   |   |
| FN1844  | -0.425                 | 7.186                |          |          | 8     |      | 10.4129    |           | AAL93943.1  Ketoacyl reductase hetN                               |                         |    |    |   |   |   |   |
|         |                        |                      |          |          |       | 10   |            | 13.9841   |                                                                   |                         |    |    |   |   |   |   |
| FN1847  | 1.144                  | 7.764                | 3.63e-3  | 1.429e-2 | 16    | 11   | 20.8259    | 14.2439   | AAL93946.1  DTD-4-dehydrorhamnose 3,5-epimerase                   |                         |    |    |   |   |   |   |
|         |                        |                      |          |          | 23    | 4    | 23.0000    | 5.5936    |                                                                   |                         |    |    |   |   |   |   |
| FN1849  | 0.102                  | 9.988                | 1.094e-1 | 6.529e-1 | 20    | 27   | 26.0323    | 34.9623   | AAL93948.1  Coenzyme F390 synthetase                              |                         |    |    |   |   |   |   |
|         |                        |                      |          |          | 40    | 19   | 40.0000    | 26.5698   |                                                                   |                         |    |    |   |   |   |   |
| FN1850  | 2.599                  | 8.646                | 5.51e-3  | 2.313e-2 | 25    | 5    | 32.5404    | 6.4745    | AAL93949.1  3-oxoacyl-[acyl-carrier-protein] synthase III         |                         |    |    |   |   |   |   |
|         |                        |                      |          |          | 66    | 7    | 66.0000    | 9.7889    |                                                                   |                         |    |    |   |   |   |   |
| FN1851  | 1.168                  | 13.475               | 6.998e-5 | 9.877e-5 | 129   | 57   | 167.9085   | 73.8093   | AAL93950.1  Ribonuclease PH                                       |                         |    |    |   |   |   |   |
|         |                        |                      |          |          | 152   | 49   | 152.0000   | 68.5221   |                                                                   |                         |    |    |   |   |   |   |
| FN1852  | -0.796                 | 10.238               | 1.207e-2 | 5.8e-2   | 29    | 34   | 37.7469    | 44.0266   | AAL93951.1  unknown                                               |                         |    |    |   |   |   |   |
|         |                        |                      |          |          | 15    | 34   | 15.0000    | 47.5459   |                                                                   |                         |    |    |   |   |   |   |
| FN1853  | -0.311                 | 7.446                | 1.997e-2 | 1.022e-1 | 9     | 13   | 11.7145    | 16.8337   | AAL93952.1  Methylaspartate mutase                                |                         |    |    |   |   |   |   |
|         |                        |                      |          |          | 12    | 9    | 12.0000    | 12.5857   |                                                                   |                         |    |    |   |   |   |   |
| FN1854  | -0.685                 | 11.090               | 4.229e-3 | 1.713e-2 | 22    | 45   | 28.6356    | 58.2705   | AAL93953.1  Methylaspartate mutase                                |                         |    |    |   |   |   |   |
|         |                        |                      |          |          | 45    | 43   | 45.0000    | 60.1316   |                                                                   |                         |    |    |   |   |   |   |
| FN1855  |                        |                      |          |          | 4     |      | 5.2065     |           | AAL93954.1  Methylaspartate mutase                                |                         |    |    |   |   |   |   |
|         |                        |                      |          |          | 7     |      | 7.0000     |           |                                                                   |                         |    |    |   |   |   |   |
| FN1856  | 0.079                  | 23.790               | 1.052e-1 | 6.249e-1 | 2497  | 2855 | 3250.1366  | 3696.9402 | AAL93955.1  Butyrate-acetoacetate CoA-transferase subunit B       |                         |    |    |   |   |   |   |
|         |                        |                      |          |          | 4579  | 2657 | 4579.0000  | 3715.5746 |                                                                   |                         |    |    |   |   |   |   |
| FN1857  | 0.978                  | 20.153               | 6.443e-6 | 2.954e-6 | 1208  | 633  | 1572.3528  | 819.6719  | AAL93956.1  Acetoacetate: butyrate/acetate coenzyme A transferase |                         |    |    |   |   |   |   |
|         |                        |                      |          |          | 1459  | 514  | 1459.0000  | 718.7826  |                                                                   |                         |    |    |   |   |   |   |
| FN1858  |                        |                      |          |          |       | 60   |            | 77.6940   | AAL93957.1  Short-chain fatty acids transporter                   |                         |    |    |   |   |   |   |
|         |                        |                      |          |          |       | 59   |            | 82.5062   |                                                                   |                         |    |    |   |   |   |   |
| FN1859  | 1.188                  | 25.876               | 6.908e-3 | 3.021e-2 | 11444 | 4473 | 14895.699  | 5792.0888 | AAL93958.1  Major outer membrane protein                          |                         |    |    |   |   |   |   |
|         |                        |                      |          |          | 8794  | 3294 | 8794.0000  | 4606.3616 |                                                                   |                         |    |    |   |   |   |   |

Show detected proteins only

Show all proteins

Filter by category:

GO: amino acid transport

Proteins found: 1358

Enter (or paste) list of ORFs

Find ORFs

Test Cutoff

q-Value

p-Value

.005

| Signif | Direction | Applies To   |
|--------|-----------|--------------|
| yes    | +         | ratios, bars |
| no     | n/a       | bars         |
| yes    | -         | ratios, bars |
| yes    | +         | p-, q-Values |
| yes    | -         | p-, q-Values |

Dot Plots

Dot Plots

Fn Summary Table

FnPg vs Fn

FnSg vs Fn

FnPgSg vs Fn

FnPgSg vs FnPg

FnSg vs FnPg

FnPgSg vs FnSg

Fn Coverage

| Protein | FnSg vs Fn             |                      |          |          | Raw  |      |          |           | Normalized                                                                 |    |      |    | Description | Log <sub>2</sub> Ratios |    |    |   |   |   |   |
|---------|------------------------|----------------------|----------|----------|------|------|----------|-----------|----------------------------------------------------------------------------|----|------|----|-------------|-------------------------|----|----|---|---|---|---|
|         | Log <sub>2</sub> Ratio | Log <sub>2</sub> Sum | q-Value  | p-Value  | FnSg | Fn   | FnSg     | Fn        | FnSg                                                                       | Fn | FnSg | Fn |             |                         |    |    |   |   |   |   |
|         |                        |                      |          |          |      |      |          |           |                                                                            |    |      |    |             | -6                      | -4 | -2 | 0 | 2 | 4 | 6 |
| FN1860  | -0.166                 | 9.450                | 8.739e-2 | 5.089e-1 | 23   | 26   | 29.9372  | 33.6674   | AAL93959.1  NA+/H+ antiporter NHAC                                         |    |      |    |             |                         |    |    |   |   |   |   |
|         |                        |                      |          |          | 20   | 16   | 20.0000  | 22.3746   |                                                                            |    |      |    |             |                         |    |    |   |   |   |   |
| FN1862  | -1.177                 | 14.864               | 2.363e-5 | 2.073e-5 | 82   | 211  | 106.7326 | 273.2240  | AAL93961.1  L-beta-lysine 5,6-aminomutase beta subunit                     |    |      |    |             |                         |    |    |   |   |   |   |
|         |                        |                      |          |          | 123  | 176  | 123.0000 | 246.1201  |                                                                            |    |      |    |             |                         |    |    |   |   |   |   |
| FN1863  | -0.558                 | 16.269               | 7.702e-4 | 2.175e-3 | 183  | 246  | 238.1958 | 318.5455  | AAL93962.1  L-beta-lysine 5,6-aminomutase alpha subunit                    |    |      |    |             |                         |    |    |   |   |   |   |
|         |                        |                      |          |          | 225  | 260  | 225.0000 | 363.5865  |                                                                            |    |      |    |             |                         |    |    |   |   |   |   |
| FN1864  | -2.269                 | 7.056                | 2.158e-3 | 7.469e-3 | 5    | 24   | 6.5081   | 31.0776   | AAL93963.1  DNA mismatch repair protein mutS                               |    |      |    |             |                         |    |    |   |   |   |   |
|         |                        |                      |          |          | 4    | 14   | 4.0000   | 19.5777   |                                                                            |    |      |    |             |                         |    |    |   |   |   |   |
| FN1865  |                        |                      |          |          |      | 4    |          | 5.1796    | AAL93964.1  Hypothetical protein                                           |    |      |    |             |                         |    |    |   |   |   |   |
|         |                        |                      |          |          |      |      |          |           |                                                                            |    |      |    |             |                         |    |    |   |   |   |   |
| FN1866  | -0.891                 | 20.673               | 3.507e-5 | 3.583e-5 | 722  | 1326 | 939.7672 | 1717.0377 | AAL93965.1  Lysine 2,3-aminomutase                                         |    |      |    |             |                         |    |    |   |   |   |   |
|         |                        |                      |          |          | 959  | 1291 | 959.0000 | 1805.3469 |                                                                            |    |      |    |             |                         |    |    |   |   |   |   |
| FN1867  | -1.299                 | 18.415               | 7.08e-6  | 3.409e-6 | 281  | 736  | 365.7543 | 953.0466  | AAL93966.1  Zn-dependent alcohol dehydrogenases and related dehydrogenases |    |      |    |             |                         |    |    |   |   |   |   |
|         |                        |                      |          |          | 388  | 645  | 388.0000 | 901.9743  |                                                                            |    |      |    |             |                         |    |    |   |   |   |   |
| FN1868  | -1.524                 | 14.040               | 1.152e-4 | 1.877e-4 | 60   | 179  | 78.0970  | 231.7871  | AAL93967.1  Hypothetical cytosolic protein                                 |    |      |    |             |                         |    |    |   |   |   |   |
|         |                        |                      |          |          | 75   | 149  | 75.0000  | 208.3630  |                                                                            |    |      |    |             |                         |    |    |   |   |   |   |
| FN1869  | -1.440                 | 14.549               | 9.958e-5 | 1.555e-4 | 63   | 180  | 82.0018  | 233.0820  | AAL93968.1  Hypothetical protein                                           |    |      |    |             |                         |    |    |   |   |   |   |
|         |                        |                      |          |          | 106  | 198  | 106.0000 | 276.8851  |                                                                            |    |      |    |             |                         |    |    |   |   |   |   |
| FN1870  |                        |                      |          |          |      | 6    |          | 8.3905    | AAL93969.1  unknown                                                        |    |      |    |             |                         |    |    |   |   |   |   |
|         |                        |                      |          |          |      |      |          |           |                                                                            |    |      |    |             |                         |    |    |   |   |   |   |
| FN1871  |                        |                      |          |          |      | 9    |          | 11.6541   | AAL93970.1  unknown                                                        |    |      |    |             |                         |    |    |   |   |   |   |
|         |                        |                      |          |          |      |      |          |           |                                                                            |    |      |    |             |                         |    |    |   |   |   |   |
| FN1872  | -2.280                 | 6.924                |          |          |      | 17   |          | 22.0133   | AAL93971.1  unknown                                                        |    |      |    |             |                         |    |    |   |   |   |   |
|         |                        |                      |          |          | 5    | 19   | 5.0000   | 26.5698   |                                                                            |    |      |    |             |                         |    |    |   |   |   |   |
| FN1873  | -2.301                 | 10.116               | 1.864e-5 | 1.482e-5 | 10   | 57   | 13.0162  | 73.8093   | AAL93972.1  Bis(5'-nucleosyl)-tetraphosphatase                             |    |      |    |             |                         |    |    |   |   |   |   |
|         |                        |                      |          |          | 17   | 53   | 17.0000  | 74.1157   |                                                                            |    |      |    |             |                         |    |    |   |   |   |   |
| FN1874  | -1.455                 | 10.186               | 3.119e-5 | 3.028e-5 | 14   | 43   | 18.2226  | 55.6807   | AAL93973.1  Ribose 5-phosphate isomerase                                   |    |      |    |             |                         |    |    |   |   |   |   |
|         |                        |                      |          |          | 23   | 41   | 23.0000  | 57.3348   |                                                                            |    |      |    |             |                         |    |    |   |   |   |   |
| FN1875  | 0.587                  | 14.875               | 4.876e-3 | 2.011e-2 | 159  | 131  | 206.9570 | 169.6319  | AAL93974.1  Peptidyl-prolyl cis-trans isomerase                            |    |      |    |             |                         |    |    |   |   |   |   |
|         |                        |                      |          |          | 218  | 81   | 218.0000 | 113.2712  |                                                                            |    |      |    |             |                         |    |    |   |   |   |   |
| FN1878  |                        |                      |          |          |      | 11   |          | 14.2439   | AAL93977.1  unknown                                                        |    |      |    |             |                         |    |    |   |   |   |   |
|         |                        |                      |          |          |      | 9    |          | 12.5857   |                                                                            |    |      |    |             |                         |    |    |   |   |   |   |

Show detected proteins only  
 Show all proteins  
 Filter by category:

Proteins found: 1358

Enter (or paste) list of ORFs

Find ORFs

Test Cutoff

q-Value

p-Value

.005

| Signif | Direction | Applies To   |
|--------|-----------|--------------|
| yes    | +         | ratios, bars |
| no     | n/a       | bars         |
| yes    | -         | ratios, bars |
| yes    | +         | p-, q-Values |
| yes    | -         | p-, q-Values |

Dot Plots

Fn Summary Table FnPg vs Fn FnSg vs Fn FnPgSg vs Fn FnPgSg vs FnPg FnSg vs FnPg FnPgSg vs FnSg Fn Coverage

| Protein | FnSg vs Fn             |                      |          |          | Raw  |     | Normalized |          | Description                                                                 | Log <sub>2</sub> Ratios |    |    |   |   |   |   |
|---------|------------------------|----------------------|----------|----------|------|-----|------------|----------|-----------------------------------------------------------------------------|-------------------------|----|----|---|---|---|---|
|         | Log <sub>2</sub> Ratio | Log <sub>2</sub> Sum | q-Value  | p-Value  | FnSg | Fn  | FnSg       | Fn       |                                                                             | -6                      | -4 | -2 | 0 | 2 | 4 | 6 |
| FN1879  |                        |                      |          |          |      | 33  |            | 46.1475  | AAL93978.1  SSU ribosomal protein S20P                                      |                         |    |    |   |   |   |   |
| FN1880  | 1.246                  | 12.413               | 1.623e-3 | 5.324e-3 | 101  | 33  | 131.4633   | 42.7317  | AAL93979.1  Oxygen-insensitive NAD(P)H nitroreductase                       |                         |    |    |   |   |   |   |
| FN1881  |                        |                      |          |          | 8    |     | 10.4129    |          | AAL93980.1  Esterase                                                        |                         |    |    |   |   |   |   |
| FN1884  |                        |                      |          |          |      | 55  |            | 71.2195  | AAL93983.1  unknown                                                         |                         |    |    |   |   |   |   |
| FN1890  |                        |                      |          |          |      | 8   |            | 10.3592  | AAL93989.1  Hypothetical protein                                            |                         |    |    |   |   |   |   |
| FN1891  | 1.317                  | 8.923                | 3.924e-4 | 9.01e-4  | 25   | 14  | 32.5404    | 18.1286  | AAL93990.1  Glycerophosphoryl diester phosphodiesterase                     |                         |    |    |   |   |   |   |
| FN1893  | -0.896                 | 18.566               | 4.388e-6 | 1.551e-6 | 336  | 648 | 437.3432   | 839.0954 | AAL93991.1  Fusobacterium outer membrane protein family                     |                         |    |    |   |   |   |   |
| FN1898  | -0.046                 | 11.871               | 1.335e-1 | 8.185e-1 | 38   | 55  | 49.4614    | 71.2195  | AAL93997.1  Sugar transport ATP-binding protein                             |                         |    |    |   |   |   |   |
| FN1899  | 0.424                  | 15.968               | 6.625e-4 | 1.77e-3  | 230  | 181 | 299.3718   | 234.3769 | AAL93998.1  Hypothetical lipoprotein                                        |                         |    |    |   |   |   |   |
| FN1901  |                        |                      |          |          | 8    |     | 8.0000     |          | AAL94000.1  Transcription regulator, CRP family                             |                         |    |    |   |   |   |   |
| FN1902  | -0.543                 | 9.769                | 8.229e-3 | 3.709e-2 | 23   | 27  | 29.9372    | 34.9623  | AAL94001.1  Deoxycytidylate deaminase                                       |                         |    |    |   |   |   |   |
| FN1903  |                        |                      |          |          |      | 55  |            | 71.2195  | AAL94002.1  Coenzyme A disulfide reductase/ disulfide bond regulator domain |                         |    |    |   |   |   |   |
| FN1905  | -0.069                 | 4.069                |          |          | 4    | 3   | 4.0000     | 4.1952   | AAL94004.1  outer membrane protein                                          |                         |    |    |   |   |   |   |
| FN1906  | 0.904                  | 17.655               | 3.077e-3 | 1.158e-2 | 408  | 257 | 531.0596   | 332.7894 | AAL94005.1  Cytosol aminopeptidase                                          |                         |    |    |   |   |   |   |
| FN1908  | 0.545                  | 16.741               | 6.616e-4 | 1.767e-3 | 330  | 233 | 429.5335   | 301.7118 | AAL94007.1  Glycerophosphoryl diester phosphodiesterase                     |                         |    |    |   |   |   |   |
| FN1909  | -1.182                 | 13.653               | 2.194e-5 | 1.868e-5 | 52   | 129 | 67.6841    | 167.0421 | AAL94008.1  UDP-3-O-[3-hydroxymyristoyl] glucosamine N-acyltransferase      |                         |    |    |   |   |   |   |

Show detected proteins only  
 Show all proteins  
 Filter by category:

Proteins found: 1358

Enter (or paste) list of ORFs

Find ORFs

Test Cutoff

q-Value

p-Value

.005

| Signif | Direction | Applies To   |
|--------|-----------|--------------|
| yes    | +         | ratios, bars |
| no     | n/a       | bars         |
| yes    | -         | ratios, bars |
| yes    | +         | p-, q-Values |
| yes    | -         | p-, q-Values |

Dot Plots Dot Plots

Fn Summary Table FnPg vs Fn FnSg vs Fn FnPgSg vs Fn FnPgSg vs FnPg FnSg vs FnPg FnPgSg vs FnSg Fn Coverage

| Protein | FnSg vs Fn             |                      |          |          | Raw  |      |           |           | Normalized |    |      |    | Description | Log <sub>2</sub> Ratios |    |    |   |   |   |   |
|---------|------------------------|----------------------|----------|----------|------|------|-----------|-----------|------------|----|------|----|-------------|-------------------------|----|----|---|---|---|---|
|         | Log <sub>2</sub> Ratio | Log <sub>2</sub> Sum | q-Value  | p-Value  | FnSg | Fn   | FnSg      | Fn        | FnSg       | Fn | FnSg | Fn |             | -6                      | -4 | -2 | 0 | 2 | 4 | 6 |
| FN1910  | -1.868                 | 15.301               | 2.212e-4 | 4.327e-4 | 107  | 257  | 139.2730  | 332.7894  |            |    |      |    |             |                         |    |    |   |   |   |   |
|         |                        |                      |          |          | 71   | 311  | 71.0000   | 434.9054  |            |    |      |    |             |                         |    |    |   |   |   |   |
| FN1911  | -0.044                 | 21.247               | 1.147e-1 | 6.882e-1 | 1320 | 1318 | 1718.1339 | 1706.6785 |            |    |      |    |             |                         |    |    |   |   |   |   |
|         |                        |                      |          |          | 1389 | 1070 | 1389.0000 | 1496.2984 |            |    |      |    |             |                         |    |    |   |   |   |   |
| FN1912  | -1.482                 | 8.543                | 3.111e-4 | 6.746e-4 | 7    | 25   | 9.1113    | 32.3725   |            |    |      |    |             |                         |    |    |   |   |   |   |
|         |                        |                      |          |          | 14   | 23   | 14.0000   | 32.1634   |            |    |      |    |             |                         |    |    |   |   |   |   |
| FN1913  | -0.721                 | 12.805               | 9.018e-4 | 2.628e-3 | 49   | 77   | 63.7792   | 99.7073   |            |    |      |    |             |                         |    |    |   |   |   |   |
|         |                        |                      |          |          | 68   | 84   | 68.0000   | 117.4664  |            |    |      |    |             |                         |    |    |   |   |   |   |
| FN1914  | -0.288                 | 13.220               | 8.128e-3 | 3.655e-2 | 69   | 76   | 89.8115   | 98.4124   |            |    |      |    |             |                         |    |    |   |   |   |   |
|         |                        |                      |          |          | 87   | 84   | 87.0000   | 117.4664  |            |    |      |    |             |                         |    |    |   |   |   |   |
| FN1917  | 1.633                  | 5.771                |          |          | 10   |      | 13.0162   |           |            |    |      |    |             |                         |    |    |   |   |   |   |
|         |                        |                      |          |          |      | 3    |           | 4.1952    |            |    |      |    |             |                         |    |    |   |   |   |   |
| FN1918  | 0.327                  | 12.767               | 1.635e-5 | 1.22e-5  | 73   | 59   | 95.0180   | 76.3991   |            |    |      |    |             |                         |    |    |   |   |   |   |
|         |                        |                      |          |          | 92   | 52   | 92.0000   | 72.7173   |            |    |      |    |             |                         |    |    |   |   |   |   |
| FN1919  | -2.663                 | 9.083                | 2.691e-6 | 7.264e-7 | 5    | 43   | 6.5081    | 55.6807   |            |    |      |    |             |                         |    |    |   |   |   |   |
|         |                        |                      |          |          | 12   | 44   | 12.0000   | 61.5300   |            |    |      |    |             |                         |    |    |   |   |   |   |
| FN1920  |                        |                      |          |          |      |      |           |           |            |    |      |    |             |                         |    |    |   |   |   |   |
|         |                        |                      |          |          | 4    |      | 4.0000    |           |            |    |      |    |             |                         |    |    |   |   |   |   |
| FN1922  | -0.162                 | 6.865                | 2.667e-4 | 5.49e-4  | 8    | 9    | 10.4129   | 11.6541   |            |    |      |    |             |                         |    |    |   |   |   |   |
|         |                        |                      |          |          | 10   | 8    | 10.0000   | 11.1873   |            |    |      |    |             |                         |    |    |   |   |   |   |
| FN1923  | -0.788                 | 3.958                |          |          |      | 4    |           | 5.1796    |            |    |      |    |             |                         |    |    |   |   |   |   |
|         |                        |                      |          |          | 3    |      | 3.0000    |           |            |    |      |    |             |                         |    |    |   |   |   |   |
| FN1926  | 0.441                  | 12.145               | 1.104e-5 | 6.865e-6 | 59   | 46   | 76.7954   | 59.5654   |            |    |      |    |             |                         |    |    |   |   |   |   |
|         |                        |                      |          |          | 80   | 40   | 80.0000   | 55.9364   |            |    |      |    |             |                         |    |    |   |   |   |   |
| FN1927  | 1.612                  | 15.520               | 5.807e-5 | 7.498e-5 | 272  | 104  | 354.0397  | 134.6696  |            |    |      |    |             |                         |    |    |   |   |   |   |
|         |                        |                      |          |          | 404  | 81   | 404.0000  | 113.2712  |            |    |      |    |             |                         |    |    |   |   |   |   |
| FN1928  | 0.431                  | 8.043                |          |          | 9    |      | 11.7145   |           |            |    |      |    |             |                         |    |    |   |   |   |   |
|         |                        |                      |          |          | 26   | 10   | 26.0000   | 13.9841   |            |    |      |    |             |                         |    |    |   |   |   |   |
| FN1929  | 0.184                  | 12.529               | 1.035e-1 | 6.135e-1 | 46   | 38   | 59.8744   | 49.2062   |            |    |      |    |             |                         |    |    |   |   |   |   |
|         |                        |                      |          |          | 104  | 68   | 104.0000  | 95.0919   |            |    |      |    |             |                         |    |    |   |   |   |   |
| FN1931  | 1.095                  | 6.306                |          |          |      | 4    |           | 5.1796    |            |    |      |    |             |                         |    |    |   |   |   |   |
|         |                        |                      |          |          | 13   | 5    | 13.0000   | 6.9920    |            |    |      |    |             |                         |    |    |   |   |   |   |

Show detected proteins only  
 Show all proteins  
 Filter by category:

Proteins found:  
1358

Test Cutoff

| Signif | Direction | Applies To   |
|--------|-----------|--------------|
| yes    | +         | ratios, bars |
| no     | n/a       | bars         |
| yes    | -         | ratios, bars |
| yes    | +         | p-, q-Values |
| yes    | -         | p-, q-Values |

Fn Summary Table FnPg vs Fn FnSg vs Fn FnPgSg vs Fn FnPgSg vs FnPg FnSg vs FnPg FnPgSg vs FnSg Fn Coverage

| Protein | FnSg vs Fn             |                      |          |          | Raw  |     | Normalized |           | Description                                                            | Log <sub>2</sub> Ratios |    |    |   |   |   |   |
|---------|------------------------|----------------------|----------|----------|------|-----|------------|-----------|------------------------------------------------------------------------|-------------------------|----|----|---|---|---|---|
|         | Log <sub>2</sub> Ratio | Log <sub>2</sub> Sum | q-Value  | p-Value  | FnSg | Fn  | FnSg       | Fn        |                                                                        | -6                      | -4 | -2 | 0 | 2 | 4 | 6 |
| FN1933  | -0.669                 | 7.482                | 2.596e-2 | 1.364e-1 | 4    | 12  | 5.2065     | 15.5388   | AAL94032.1  Hypothetical protein                                       |                         |    |    |   |   |   |   |
|         |                        |                      |          |          | 16   | 13  | 16.0000    | 18.1793   |                                                                        |                         |    |    |   |   |   |   |
| FN1935  | -0.378                 | 6.688                | 5.619e-2 | 3.163e-1 | 6    | 6   | 7.8097     | 7.7694    | AAL94034.1  Adenine-specific methyltransferase                         |                         |    |    |   |   |   |   |
|         |                        |                      |          |          | 10   | 11  | 10.0000    | 15.3825   |                                                                        |                         |    |    |   |   |   |   |
| FN1939  | -0.375                 | 7.536                | 5.459e-2 | 3.067e-1 | 13   | 11  | 16.9210    | 14.2439   | AAL94038.1  Hypothetical protein                                       |                         |    |    |   |   |   |   |
|         |                        |                      |          |          | 7    | 12  | 7.0000     | 16.7809   |                                                                        |                         |    |    |   |   |   |   |
| FN1941  | 1.994                  | 15.848               | 1.202e-3 | 3.715e-3 | 314  | 94  | 408.7076   | 121.7206  | AAL94040.1  ClpB protein                                               |                         |    |    |   |   |   |   |
|         |                        |                      |          |          | 561  | 87  | 561.0000   | 121.6616  |                                                                        |                         |    |    |   |   |   |   |
| FN1942  | -0.373                 | 4.373                |          |          |      | 4   |            | 5.1796    | AAL94041.1  putative DNA-binding protein                               |                         |    |    |   |   |   |   |
|         |                        |                      |          |          | 4    |     | 4.0000     |           |                                                                        |                         |    |    |   |   |   |   |
| FN1943  | 1.724                  | 22.081               | 1.794e-5 | 1.398e-5 | 2836 | 929 | 3691.3846  | 1202.9623 | AAL94042.1  Tryptophanase                                              |                         |    |    |   |   |   |   |
|         |                        |                      |          |          | 3965 | 797 | 3965.0000  | 1114.5325 |                                                                        |                         |    |    |   |   |   |   |
| FN1948  |                        |                      |          |          | 10   |     | 13.0162    |           | AAL94044.1  Hypothetical protein                                       |                         |    |    |   |   |   |   |
|         |                        |                      |          |          | 6    |     | 6.0000     |           |                                                                        |                         |    |    |   |   |   |   |
| FN1949  | 2.545                  | 9.559                | 1.518e-7 | 1.049e-8 | 52   | 10  | 67.6841    | 12.9490   | AAL94045.1  Xaa-Pro dipeptidase                                        |                         |    |    |   |   |   |   |
|         |                        |                      |          |          | 65   | 7   | 65.0000    | 9.7889    |                                                                        |                         |    |    |   |   |   |   |
| FN1950  |                        |                      |          |          |      | 55  |            | 71.2195   | AAL94046.1  Serine protease                                            |                         |    |    |   |   |   |   |
|         |                        |                      |          |          |      | 43  |            | 60.1316   |                                                                        |                         |    |    |   |   |   |   |
| FN1951  | -0.914                 | 4.914                |          |          |      | 3   |            | 3.8847    | AAL94047.1  ATPase associated with chromosome architecture/replication |                         |    |    |   |   |   |   |
|         |                        |                      |          |          | 4    | 8   | 4.0000     | 11.1873   |                                                                        |                         |    |    |   |   |   |   |
| FN1956  |                        |                      |          |          | 10   |     | 13.0162    |           | AAL94052.1  Hypothetical protein                                       |                         |    |    |   |   |   |   |
|         |                        |                      |          |          | 13   |     | 13.0000    |           |                                                                        |                         |    |    |   |   |   |   |
| FN1964  | -1.125                 | 8.710                | 1.536e-4 | 2.78e-4  | 9    | 24  | 11.7145    | 31.0776   | AAL94054.1  O-linked GLCNAC transferase                                |                         |    |    |   |   |   |   |
|         |                        |                      |          |          | 16   | 21  | 16.0000    | 29.3666   |                                                                        |                         |    |    |   |   |   |   |
| FN1965  | 0.148                  | 10.770               | 9.843e-2 | 5.801e-1 | 43   | 30  | 55.9695    | 38.8470   | AAL94055.1  Tetratricopeptide repeat family protein                    |                         |    |    |   |   |   |   |
|         |                        |                      |          |          | 32   | 29  | 32.0000    | 40.5539   |                                                                        |                         |    |    |   |   |   |   |
| FN1966  | 0.307                  | 12.286               | 1.663e-2 | 8.362e-2 | 67   | 42  | 87.2083    | 54.3858   | AAL94056.1  Hypothetical protein                                       |                         |    |    |   |   |   |   |
|         |                        |                      |          |          | 70   | 52  | 70.0000    | 72.7173   |                                                                        |                         |    |    |   |   |   |   |
| FN1970  |                        |                      |          |          |      | 4   |            | 5.1796    | AAL94060.1  Hemin-binding periplasmic protein hmuT precursor           |                         |    |    |   |   |   |   |
|         |                        |                      |          |          |      | 5   |            | 6.9920    |                                                                        |                         |    |    |   |   |   |   |
| FN1971  | -1.568                 | 7.478                | 9.772e-4 | 2.897e-3 | 5    | 15  | 6.5081     | 19.4235   | AAL94061.1  Hemin receptor                                             |                         |    |    |   |   |   |   |
|         |                        |                      |          |          | 9    | 19  | 9.0000     | 26.5698   |                                                                        |                         |    |    |   |   |   |   |

Show detected proteins only  
 Show all proteins  
 Filter by category:

Proteins found: 1358

Test Cutoff

| Signif | Direction | Applies To   |
|--------|-----------|--------------|
| yes    | +         | ratios, bars |
| no     | n/a       | bars         |
| yes    | -         | ratios, bars |
| yes    | +         | p-, q-Values |
| yes    | -         |              |

Fn Summary Table FnPg vs Fn FnSg vs Fn FnPgSg vs Fn FnPgSg vs FnPg FnSg vs FnPg FnPgSg vs FnSg Fn Coverage

| Protein | FnSg vs Fn             |                      |          |          | Raw  |     | Normalized |          | Description                                           | Log <sub>2</sub> Ratios |    |    |   |   |   |   |
|---------|------------------------|----------------------|----------|----------|------|-----|------------|----------|-------------------------------------------------------|-------------------------|----|----|---|---|---|---|
|         | Log <sub>2</sub> Ratio | Log <sub>2</sub> Sum | q-Value  | p-Value  | FnSg | Fn  | FnSg       | Fn       |                                                       | -6                      | -4 | -2 | 0 | 2 | 4 | 6 |
| FN1972  | 1.441                  | 8.932                | 1.657e-2 | 8.333e-2 | 16   | 11  | 20.8259    | 14.2439  | AAL94062.1  unknown                                   |                         |    |    |   |   |   |   |
|         |                        |                      |          |          | 52   | 9   | 52.0000    | 12.5857  |                                                       | ■                       |    |    |   |   |   |   |
| FN1973  | 0.927                  | 10.956               | 5.059e-3 | 2.097e-2 | 56   | 24  | 72.8905    | 31.0776  | AAL94063.1  Translation initiation inhibitor          |                         |    |    |   |   |   |   |
|         |                        |                      |          |          | 50   | 24  | 50.0000    | 33.5618  |                                                       | ■                       |    |    |   |   |   |   |
| FN1974  | -0.437                 | 6.052                |          |          |      | 6   |            | 7.7694   | AAL94064.1  DNA/RNA helicase (DEAD/DEAH BOX family)   |                         |    |    |   |   |   |   |
|         |                        |                      |          |          | 7    | 8   | 7.0000     | 11.1873  |                                                       | ■                       |    |    |   |   |   |   |
| FN1975  | -0.734                 | 14.551               | 6.127e-4 | 1.597e-3 | 107  | 164 | 139.2730   | 212.3636 | AAL94065.1  ATP-dependent RNA helicase                |                         |    |    |   |   |   |   |
|         |                        |                      |          |          | 101  | 134 | 101.0000   | 187.3869 |                                                       | ■                       |    |    |   |   |   |   |
| FN1976  | 0.411                  | 11.821               | 1.555e-2 | 7.767e-2 | 62   | 46  | 80.7002    | 59.5654  | AAL94066.1  4-amino-4-deoxychorismate lyase           |                         |    |    |   |   |   |   |
|         |                        |                      |          |          | 58   | 32  | 58.0000    | 44.7491  |                                                       | ■                       |    |    |   |   |   |   |
| FN1977  | 0.169                  | 6.403                | 1.065e-1 | 6.335e-1 | 5    | 8   | 6.5081     | 10.3592  | AAL94067.1  Cell cycle protein MesJ                   |                         |    |    |   |   |   |   |
|         |                        |                      |          |          | 13   | 5   | 13.0000    | 6.9920   |                                                       | ■                       |    |    |   |   |   |   |
| FN1978  | -1.358                 | 14.502               | 1.201e-5 | 7.948e-6 | 64   | 178 | 83.3035    | 230.4922 | AAL94068.1  Cell division protein ftsH                |                         |    |    |   |   |   |   |
|         |                        |                      |          |          | 107  | 184 | 107.0000   | 257.3074 |                                                       | ■                       |    |    |   |   |   |   |
| FN1979  |                        |                      |          |          |      | 75  |            | 97.1175  | AAL94069.1  SSU ribosomal protein S15P                |                         |    |    |   |   |   |   |
|         |                        |                      |          |          |      | 86  |            | 120.2632 |                                                       |                         |    |    |   |   |   |   |
| FN1980  |                        |                      |          |          | 4    |     | 5.2065     |          | AAL94070.1  Transporter                               |                         |    |    |   |   |   |   |
| FN1983  | -1.088                 | 16.748               | 5.663e-6 | 2.333e-6 | 186  | 380 | 242.1007   | 492.0621 | AAL94073.1  Alkyl hydroperoxide reductase C22 protein |                         |    |    |   |   |   |   |
|         |                        |                      |          |          | 213  | 340 | 213.0000   | 475.4593 |                                                       | ■                       |    |    |   |   |   |   |
| FN1984  | -0.591                 | 16.170               | 4.172e-4 | 9.723e-4 | 154  | 276 | 200.4490   | 357.3925 | AAL94074.1  Thioredoxin reductase                     |                         |    |    |   |   |   |   |
|         |                        |                      |          |          | 242  | 221 | 242.0000   | 309.0485 |                                                       | ■                       |    |    |   |   |   |   |
| FN1985  | -0.248                 | 13.209               | 2.038e-2 | 1.046e-1 | 65   | 72  | 84.6051    | 93.2328  | AAL94075.1  Inner membrane protein                    |                         |    |    |   |   |   |   |
|         |                        |                      |          |          | 94   | 85  | 94.0000    | 118.8648 |                                                       | ■                       |    |    |   |   |   |   |
| FN1986  | -0.445                 | 16.161               | 1.66e-2  | 8.349e-2 | 222  | 248 | 288.9589   | 321.1353 | AAL94076.1  Hypothetical protein                      |                         |    |    |   |   |   |   |
|         |                        |                      |          |          | 175  | 222 | 175.0000   | 310.4470 |                                                       | ■                       |    |    |   |   |   |   |
| FN1987  | -0.299                 | 5.469                |          |          |      | 6   |            | 7.7694   | AAL94077.1  Transcriptional regulator, GntR family    |                         |    |    |   |   |   |   |
|         |                        |                      |          |          | 6    | 5   | 6.0000     | 6.9920   |                                                       | ■                       |    |    |   |   |   |   |
| FN1988  | 4.705                  | 16.346               | 1.624e-3 | 5.33e-3  | 1391 | 43  | 1810.5486  | 55.6807  | AAL94078.1  Tyrosine phenol-lyase                     |                         |    |    |   |   |   |   |
|         |                        |                      |          |          | 1137 | 41  | 1137.0000  | 57.3348  |                                                       | ■                       |    |    |   |   |   |   |
| FN1989  |                        |                      |          |          | 12   |     | 15.6194    |          | AAL94079.1  Sodium-dependent tyrosine transporter     |                         |    |    |   |   |   |   |
|         |                        |                      |          |          | 8    |     | 8.0000     |          |                                                       |                         |    |    |   |   |   |   |

Show detected proteins only  
 Show all proteins  
 Filter by category:

Proteins found: 1358

Enter (or paste) list of ORFs

Find ORFs

Test Cutoff

q-Value p-Value

.005

| Signif | Direction | Applies To   |
|--------|-----------|--------------|
| ■      | yes +     | ratios, bars |
| ■      | no n/a    | bars         |
| ■      | yes -     | ratios, bars |
| ■      | yes +     | p-, q-Values |
| ■      | yes -     | p-, q-Values |

Dot Plots Dot Plots



Fn Summary Table FnPg vs Fn FnSg vs Fn FnPgSg vs Fn FnPgSg vs FnPg FnSg vs FnPg FnPgSg vs FnSg Fn Coverage

| Protein | FnSg vs Fn             |                      |          |          | Raw  |     | Normalized |          | Description                                                     | Log <sub>2</sub> Ratios |    |    |   |   |   |   |
|---------|------------------------|----------------------|----------|----------|------|-----|------------|----------|-----------------------------------------------------------------|-------------------------|----|----|---|---|---|---|
|         | Log <sub>2</sub> Ratio | Log <sub>2</sub> Sum | q-Value  | p-Value  | FnSg | Fn  | FnSg       | Fn       |                                                                 | -6                      | -4 | -2 | 0 | 2 | 4 | 6 |
| FN1991  | -0.176                 | 17.229               | 1.402e-2 | 6.907e-2 | 260  | 326 | 338.4203   | 422.1375 | AAL94081.1  Glucosamine-1-phosphate acetyltransferase           |                         |    |    |   |   |   |   |
|         |                        |                      |          |          | 399  | 294 | 399.0000   | 411.1325 |                                                                 |                         |    |    |   |   |   |   |
| FN1992  | 0.654                  | 16.533               | 5.373e-3 | 2.247e-2 | 340  | 187 | 442.5496   | 242.1463 | AAL94082.1  Ribose-phosphate pyrophosphokinase                  |                         |    |    |   |   |   |   |
|         |                        |                      |          |          | 330  | 178 | 330.0000   | 248.9169 |                                                                 |                         |    |    |   |   |   |   |
| FN1993  | -0.248                 | 5.142                |          |          | 3    | 5   | 3.9048     | 6.4745   | AAL94083.1  SUA5 protein                                        |                         |    |    |   |   |   |   |
|         |                        |                      |          |          | 7    |     | 7.0000     |          |                                                                 |                         |    |    |   |   |   |   |
| FN1994  | -1.234                 | 10.496               | 1.32e-2  | 6.439e-2 | 35   | 49  | 45.5566    | 63.4501  | AAL94084.1  Hypothetical protein                                |                         |    |    |   |   |   |   |
|         |                        |                      |          |          | 4    | 38  | 4.0000     | 53.1396  |                                                                 |                         |    |    |   |   |   |   |
| FN1995  |                        |                      |          |          |      | 6   |            | 7.7694   | AAL94085.1  Hypothetical protein                                |                         |    |    |   |   |   |   |
|         |                        |                      |          |          |      | 8   |            | 11.1873  |                                                                 |                         |    |    |   |   |   |   |
| FN2001  | 0.893                  | 7.921                | 1.367e-3 | 4.347e-3 | 18   | 9   | 23.4291    | 11.6541  | AAL94091.1  Hypothetical protein                                |                         |    |    |   |   |   |   |
|         |                        |                      |          |          | 19   | 8   | 19.0000    | 11.1873  |                                                                 |                         |    |    |   |   |   |   |
| FN2002  |                        |                      |          |          |      |     |            |          | AAL94092.1  Permease                                            |                         |    |    |   |   |   |   |
|         |                        |                      |          |          | 3    |     | 3.0000     |          |                                                                 |                         |    |    |   |   |   |   |
| FN2007  | -1.896                 | 7.321                | 1.205e-3 | 3.725e-3 | 7    | 15  | 9.1113     | 19.4235  | AAL94097.1  Glutathione peroxidase                              |                         |    |    |   |   |   |   |
|         |                        |                      |          |          | 4    | 21  | 4.0000     | 29.3666  |                                                                 |                         |    |    |   |   |   |   |
| FN2008  | 0.312                  | 4.449                |          |          | 4    |     | 5.2065     |          | AAL94098.1  Glycine betaine transport ATP-binding protein       |                         |    |    |   |   |   |   |
|         |                        |                      |          |          |      | 3   |            | 4.1952   |                                                                 |                         |    |    |   |   |   |   |
| FN2009  |                        |                      |          |          | 6    |     | 7.8097     |          | AAL94099.1  Glycine betaine transport system permease protein   |                         |    |    |   |   |   |   |
|         |                        |                      |          |          | 8    |     | 8.0000     |          |                                                                 |                         |    |    |   |   |   |   |
| FN2011  | -0.766                 | 14.767               | 1.108e-2 | 5.252e-2 | 60   | 171 | 78.0970    | 221.4279 | AAL94101.1  Valyl-tRNA synthetase                               |                         |    |    |   |   |   |   |
|         |                        |                      |          |          | 178  | 153 | 178.0000   | 213.9567 |                                                                 |                         |    |    |   |   |   |   |
| FN2013  | -0.050                 | 5.340                |          |          | 5    | 5   | 6.5081     | 6.4745   | AAL94103.1  GTP-binding protein                                 |                         |    |    |   |   |   |   |
|         |                        |                      |          |          | 6    |     | 6.0000     |          |                                                                 |                         |    |    |   |   |   |   |
| FN2014  | -1.139                 | 15.688               | 8.765e-6 | 4.761e-6 | 128  | 275 | 166.6069   | 356.0976 | AAL94104.1  ATP-dependent protease La                           |                         |    |    |   |   |   |   |
|         |                        |                      |          |          | 143  | 233 | 143.0000   | 325.8295 |                                                                 |                         |    |    |   |   |   |   |
| FN2015  | -0.392                 | 14.086               | 2.191e-3 | 7.61e-3  | 97   | 108 | 126.2568   | 139.8492 | AAL94105.1  ATP-dependent clp protease ATP-binding subunit clpX |                         |    |    |   |   |   |   |
|         |                        |                      |          |          | 104  | 116 | 104.0000   | 162.2155 |                                                                 |                         |    |    |   |   |   |   |
| FN2016  | -1.657                 | 9.704                | 6.144e-5 | 8.136e-5 | 15   | 36  | 19.5242    | 46.6164  | AAL94106.1  ATP-dependent Clp protease proteolytic subunit      |                         |    |    |   |   |   |   |
|         |                        |                      |          |          | 13   | 40  | 13.0000    | 55.9364  |                                                                 |                         |    |    |   |   |   |   |
| FN2017  | -1.253                 | 18.465               | 1.917e-5 | 1.548e-5 | 273  | 728 | 355.3413   | 942.6874 | AAL94107.1  Trigger factor, ppiase                              |                         |    |    |   |   |   |   |
|         |                        |                      |          |          | 424  | 654 | 424.0000   | 914.5600 |                                                                 |                         |    |    |   |   |   |   |

Show detected proteins only  
 Show all proteins  
 Filter by category:

Proteins found: 1358

Test Cutoff

| Signif | Direction | Applies To   |
|--------|-----------|--------------|
| yes    | +         | ratios, bars |
| no     | n/a       | bars         |
| yes    | -         | ratios, bars |
| yes    | +         | p-, q-Values |
| yes    | -         | p-, q-Values |

Fn Summary Table FnPg vs Fn FnSg vs Fn FnPgSg vs Fn FnPgSg vs FnPg FnSg vs FnPg FnPgSg vs FnSg Fn Coverage

| Protein | FnSg vs Fn             |                      |          |          | Raw  |     | Normalized |          | Description                                                          | Log <sub>2</sub> Ratios |    |    |   |   |   |   |
|---------|------------------------|----------------------|----------|----------|------|-----|------------|----------|----------------------------------------------------------------------|-------------------------|----|----|---|---|---|---|
|         | Log <sub>2</sub> Ratio | Log <sub>2</sub> Sum | q-Value  | p-Value  | FnSg | Fn  | FnSg       | Fn       |                                                                      | -6                      | -4 | -2 | 0 | 2 | 4 | 6 |
| FN2018  | -1.817                 | 9.504                | 3.3e-5   | 3.28e-5  | 9    | 36  | 11.7145    | 46.6164  | AAL94108.1  Single-stranded-DNA-specific exonuclease recJ            |                         |    |    |   |   |   |   |
|         |                        |                      |          |          | 17   | 39  | 17.0000    | 54.5380  |                                                                      |                         |    |    |   |   |   |   |
| FN2019  | -3.061                 | 8.231                |          |          |      | 32  |            | 41.4368  | AAL94109.1  Ribosome-binding factor A                                |                         |    |    |   |   |   |   |
|         |                        |                      |          |          | 6    | 42  | 6.0000     | 58.7332  |                                                                      |                         |    |    |   |   |   |   |
| FN2020  | 0.002                  | 16.611               | 1.571e-1 | 9.905e-1 | 196  | 242 | 255.1168   | 313.3659 | AAL94110.1  Bacterial Protein Translation Initiation Factor 2 (IF-2) |                         |    |    |   |   |   |   |
|         |                        |                      |          |          | 378  | 228 | 378.0000   | 318.8374 |                                                                      |                         |    |    |   |   |   |   |
| FN2022  | -0.330                 | 13.326               | 4.754e-4 | 1.149e-3 | 72   | 88  | 93.7164    | 113.9512 | AAL94112.1  N utilization substance protein A                        |                         |    |    |   |   |   |   |
|         |                        |                      |          |          | 87   | 81  | 87.0000    | 113.2712 |                                                                      |                         |    |    |   |   |   |   |
| FN2023  | 0.634                  | 7.675                | 2.435e-3 | 8.665e-3 | 12   | 8   | 15.6194    | 10.3592  | AAL94113.1  Hypothetical cytosolic protein                           |                         |    |    |   |   |   |   |
|         |                        |                      |          |          | 20   | 9   | 20.0000    | 12.5857  |                                                                      |                         |    |    |   |   |   |   |
| FN2030  | -2.696                 | 13.977               | 1.006e-4 | 1.575e-4 | 39   | 265 | 50.7630    | 343.1486 | AAL94115.1  Inorganic pyrophosphatase                                |                         |    |    |   |   |   |   |
|         |                        |                      |          |          | 49   | 217 | 49.0000    | 303.4549 |                                                                      |                         |    |    |   |   |   |   |
| FN2031  | -2.199                 | 6.199                |          |          |      | 10  |            | 12.9490  | AAL94116.1  Thiamine biosynthesis lipoprotein appE                   |                         |    |    |   |   |   |   |
|         |                        |                      |          |          | 4    | 17  | 4.0000     | 23.7730  |                                                                      |                         |    |    |   |   |   |   |
| FN2033  | -0.528                 | 7.929                |          |          |      | 16  |            | 20.7184  | AAL94118.1  Guanylate kinase                                         |                         |    |    |   |   |   |   |
|         |                        |                      |          |          | 13   | 12  | 13.0000    | 16.7809  |                                                                      |                         |    |    |   |   |   |   |
| FN2034  | -0.761                 | 8.605                | 3.446e-3 | 1.336e-2 | 11   | 17  | 14.3178    | 22.0133  | AAL94119.1  Protein yicC                                             |                         |    |    |   |   |   |   |
|         |                        |                      |          |          | 16   | 21  | 16.0000    | 29.3666  |                                                                      |                         |    |    |   |   |   |   |
| FN2035  | -0.199                 | 18.360               | 1.235e-2 | 5.959e-2 | 453  | 490 | 589.6323   | 634.5011 | AAL94120.1  DNA-directed RNA polymerase beta' chain                  |                         |    |    |   |   |   |   |
|         |                        |                      |          |          | 493  | 435 | 493.0000   | 608.3082 |                                                                      |                         |    |    |   |   |   |   |
| FN2036  | -0.392                 | 17.925               | 8.896e-4 | 2.585e-3 | 318  | 469 | 413.9141   | 607.3082 | AAL94121.1  DNA-directed RNA polymerase beta chain                   |                         |    |    |   |   |   |   |
|         |                        |                      |          |          | 457  | 383 | 457.0000   | 535.5909 |                                                                      |                         |    |    |   |   |   |   |
| FN2037  | -0.522                 | 19.081               | 2.186e-2 | 1.13e-1  | 315  | 682 | 410.0092   | 883.1220 | AAL94122.1  LSU ribosomal protein L12P (L7/L12)                      |                         |    |    |   |   |   |   |
|         |                        |                      |          |          | 833  | 645 | 833.0000   | 901.9743 |                                                                      |                         |    |    |   |   |   |   |
| FN2038  | -1.449                 | 15.646               | 1.934e-3 | 6.543e-3 | 103  | 242 | 134.0665   | 313.3659 | AAL94123.1  LSU ribosomal protein L10P                               |                         |    |    |   |   |   |   |
|         |                        |                      |          |          | 140  | 311 | 140.0000   | 434.9054 |                                                                      |                         |    |    |   |   |   |   |
| FN2039  | -0.652                 | 16.992               | 1.718e-3 | 5.69e-3  | 252  | 349 | 328.0074   | 451.9202 | AAL94124.1  LSU ribosomal protein L1P                                |                         |    |    |   |   |   |   |
|         |                        |                      |          |          | 248  | 324 | 248.0000   | 453.0847 |                                                                      |                         |    |    |   |   |   |   |
| FN2040  | -2.637                 | 11.403               | 5.239e-4 | 1.306e-3 | 19   | 114 | 24.7307    | 147.6186 | AAL94125.1  LSU ribosomal protein L11P                               |                         |    |    |   |   |   |   |
|         |                        |                      |          |          | 17   | 80  | 17.0000    | 111.8728 |                                                                      |                         |    |    |   |   |   |   |
| FN2041  | -1.140                 | 10.526               | 2.006e-4 | 3.838e-4 | 19   | 47  | 24.7307    | 60.8603  | AAL94126.1  Transcription antitermination protein nusG               |                         |    |    |   |   |   |   |
|         |                        |                      |          |          | 27   | 38  | 27.0000    | 53.1396  |                                                                      |                         |    |    |   |   |   |   |

Show detected proteins only  
 Show all proteins  
 Filter by category:

Proteins found:  
1358

Test Cutoff

| Signif | Direction | Applies To   |
|--------|-----------|--------------|
| yes    | +         | ratios, bars |
| no     | n/a       | bars         |
| yes    | -         | ratios, bars |
| yes    | +         | p-, q-Values |
| yes    | -         |              |

Fn Summary Table FnPg vs Fn FnSg vs Fn FnPgSg vs Fn FnPgSg vs FnPg FnSg vs FnPg FnPgSg vs FnSg Fn Coverage

| Protein | FnSg vs Fn             |                      |          |          | Raw  |     |          |          | Normalized |    |      |    | Description                                             | Log <sub>2</sub> Ratios |    |    |   |   |   |   |
|---------|------------------------|----------------------|----------|----------|------|-----|----------|----------|------------|----|------|----|---------------------------------------------------------|-------------------------|----|----|---|---|---|---|
|         | Log <sub>2</sub> Ratio | Log <sub>2</sub> Sum | q-Value  | p-Value  | FnSg | Fn  | FnSg     | Fn       | FnSg       | Fn | FnSg | Fn |                                                         | -6                      | -4 | -2 | 0 | 2 | 4 | 6 |
| FN2045  |                        |                      |          |          | 7    |     | 9.1113   |          |            |    |      |    | AAL94129.1  Ferric uptake regulation protein            |                         |    |    |   |   |   |   |
|         |                        |                      |          |          | 17   |     | 17.0000  |          |            |    |      |    |                                                         |                         |    |    |   |   |   |   |
| FN2046  |                        |                      |          |          | 16   |     | 20.8259  |          |            |    |      |    | AAL94130.1  Acetyltransferase                           |                         |    |    |   |   |   |   |
|         |                        |                      |          |          | 14   |     | 14.0000  |          |            |    |      |    |                                                         |                         |    |    |   |   |   |   |
| FN2047  | -2.828                 | 16.814               | 1.022e-6 | 1.554e-7 | 92   | 685 | 119.7487 | 887.0067 |            |    |      |    | AAL94131.1  Fusobacterium outer membrane protein family |                         |    |    |   |   |   |   |
|         |                        |                      |          |          | 135  | 659 | 135.0000 | 921.5520 |            |    |      |    |                                                         |                         |    |    |   |   |   |   |
| FN2048  | 0.460                  | 16.509               | 4.768e-2 | 2.649e-1 | 180  | 198 | 234.2910 | 256.3902 |            |    |      |    | AAL94132.1  Outer membrane protein                      |                         |    |    |   |   |   |   |
|         |                        |                      |          |          | 482  | 189 | 482.0000 | 264.2994 |            |    |      |    |                                                         |                         |    |    |   |   |   |   |
| FN2049  | 0.575                  | 17.548               | 2.44e-4  | 4.894e-4 | 430  | 270 | 559.6951 | 349.6231 |            |    |      |    | AAL94133.1  unknown                                     |                         |    |    |   |   |   |   |
|         |                        |                      |          |          | 509  | 263 | 509.0000 | 367.7818 |            |    |      |    |                                                         |                         |    |    |   |   |   |   |
| FN2050  | -2.496                 | 13.698               | 1.488e-4 | 2.659e-4 | 40   | 195 | 52.0647  | 252.5055 |            |    |      |    | AAL94134.1  Hypothetical membrane-spanning protein      |                         |    |    |   |   |   |   |
|         |                        |                      |          |          | 45   | 211 | 45.0000  | 295.0644 |            |    |      |    |                                                         |                         |    |    |   |   |   |   |
| FN2051  | -0.996                 | 13.556               | 3.358e-3 | 1.293e-2 | 81   | 113 | 105.4309 | 146.3237 |            |    |      |    | AAL94135.1  unknown                                     |                         |    |    |   |   |   |   |
|         |                        |                      |          |          | 50   | 117 | 50.0000  | 163.6139 |            |    |      |    |                                                         |                         |    |    |   |   |   |   |
| FN2052  | -1.817                 | 14.263               | 4.337e-4 | 1.021e-3 | 81   | 210 | 105.4309 | 271.9291 |            |    |      |    | AAL94136.1  unknown                                     |                         |    |    |   |   |   |   |
|         |                        |                      |          |          | 44   | 182 | 44.0000  | 254.5106 |            |    |      |    |                                                         |                         |    |    |   |   |   |   |
| FN2053  | -0.412                 | 11.942               | 8.627e-3 | 3.921e-2 | 49   | 61  | 63.7792  | 78.9889  |            |    |      |    | AAL94137.1  Serine/threonine sodium symporter           |                         |    |    |   |   |   |   |
|         |                        |                      |          |          | 45   | 47  | 45.0000  | 65.7253  |            |    |      |    |                                                         |                         |    |    |   |   |   |   |
| FN2054  | -1.117                 | 14.807               | 4.601e-5 | 5.443e-5 | 96   | 195 | 124.9552 | 252.5055 |            |    |      |    | AAL94138.1  Glucose-6-phosphate isomerase               |                         |    |    |   |   |   |   |
|         |                        |                      |          |          | 105  | 176 | 105.0000 | 246.1201 |            |    |      |    |                                                         |                         |    |    |   |   |   |   |
| FN2058  | -1.249                 | 16.655               | 1.385e-6 | 2.534e-7 | 155  | 374 | 201.7506 | 484.2927 |            |    |      |    | AAL94142.1  Fusobacterium outer membrane protein family |                         |    |    |   |   |   |   |
|         |                        |                      |          |          | 215  | 362 | 215.0000 | 506.2243 |            |    |      |    |                                                         |                         |    |    |   |   |   |   |
| FN2059  | 0.460                  | 16.509               | 4.768e-2 | 2.649e-1 | 180  | 198 | 234.2910 | 256.3902 |            |    |      |    | AAL94143.1  Outer membrane protein                      |                         |    |    |   |   |   |   |
|         |                        |                      |          |          | 482  | 189 | 482.0000 | 264.2994 |            |    |      |    |                                                         |                         |    |    |   |   |   |   |
| FN2060  | 0.575                  | 17.548               | 2.44e-4  | 4.894e-4 | 430  | 270 | 559.6951 | 349.6231 |            |    |      |    | AAL94144.1  unknown                                     |                         |    |    |   |   |   |   |
|         |                        |                      |          |          | 509  | 263 | 509.0000 | 367.7818 |            |    |      |    |                                                         |                         |    |    |   |   |   |   |
| FN2061  | -2.496                 | 13.698               | 1.488e-4 | 2.659e-4 | 40   | 195 | 52.0647  | 252.5055 |            |    |      |    | AAL94145.1  Hypothetical membrane-spanning protein      |                         |    |    |   |   |   |   |
|         |                        |                      |          |          | 45   | 211 | 45.0000  | 295.0644 |            |    |      |    |                                                         |                         |    |    |   |   |   |   |
| FN2062  | -0.996                 | 13.556               | 3.358e-3 | 1.293e-2 | 81   | 113 | 105.4309 | 146.3237 |            |    |      |    | AAL94146.1  unknown                                     |                         |    |    |   |   |   |   |
|         |                        |                      |          |          | 50   | 117 | 50.0000  | 163.6139 |            |    |      |    |                                                         |                         |    |    |   |   |   |   |
| FN2063  | -1.817                 | 14.263               | 4.337e-4 | 1.021e-3 | 81   | 210 | 105.4309 | 271.9291 |            |    |      |    | AAL94147.1  unknown                                     |                         |    |    |   |   |   |   |
|         |                        |                      |          |          | 44   | 182 | 44.0000  | 254.5106 |            |    |      |    |                                                         |                         |    |    |   |   |   |   |

Show detected proteins only  
 Show all proteins  
 Filter by category:

Proteins found:  
1358

Enter (or paste) list of ORFs

Find ORFs

Test Cutoff

q-Value

p-Value

.005

| Signif | Direction | Applies To   |
|--------|-----------|--------------|
| yes    | +         | ratios, bars |
| no     | n/a       | bars         |
| yes    | -         | ratios, bars |
| yes    | +         | p-, q-Values |
| yes    | -         | p-, q-Values |

Dot Plots

 Dot Plots

Fn Summary Table

FnPg vs Fn

FnSg vs Fn

FnPgSg vs Fn

FnPgSg vs FnPg

FnSg vs FnPg

FnPgSg vs FnSg

Fn Coverage

| Protein | FnSg vs Fn             |                      |          |          | Raw  |      | Normalized |           | Description                                                | Log <sub>2</sub> Ratios |    |    |   |   |   |   |
|---------|------------------------|----------------------|----------|----------|------|------|------------|-----------|------------------------------------------------------------|-------------------------|----|----|---|---|---|---|
|         | Log <sub>2</sub> Ratio | Log <sub>2</sub> Sum | q-Value  | p-Value  | FnSg | Fn   | FnSg       | Fn        |                                                            | -6                      | -4 | -2 | 0 | 2 | 4 | 6 |
| FN2067  | -0.420                 | 5.590                |          |          | 6    | 7    | 6.0000     | 9.0643    | AAL94151.1  Thiol:disulfide interchange protein tlpA       |                         |    |    |   |   |   |   |
| FN2068  | 1.442                  | 7.210                | 2.632e-2 | 1.385e-1 | 31   | 6    | 31.0000    | 7.7694    | AAL94152.1  dGTP triphosphohydrolase                       |                         |    |    |   |   |   |   |
| FN2069  |                        |                      |          |          |      | 4    |            | 5.5936    | AAL94153.1  Amino acid carrier protein alsT                |                         |    |    |   |   |   |   |
| FN2070  | -0.680                 | 8.083                | 4.726e-6 | 1.736e-6 | 10   | 16   | 13.0162    | 20.7184   | AAL94154.1  Cobyric acid synthase                          |                         |    |    |   |   |   |   |
| FN2073  | 1.727                  | 10.592               | 2.867e-3 | 1.06e-2  | 43   | 15   | 55.9695    | 19.4235   | AAL94157.1  Adenine phosphoribosyltransferase              |                         |    |    |   |   |   |   |
| FN2075  | -1.773                 | 10.224               | 6.886e-4 | 1.864e-3 | 8    | 48   | 10.4129    | 62.1552   | AAL94159.1  Hypothetical protein                           |                         |    |    |   |   |   |   |
| FN2078  | 0.627                  | 5.373                |          |          | 8    | 4    | 8.0000     | 5.1796    | AAL94162.1  Transcriptional regulator, DeoR family         |                         |    |    |   |   |   |   |
| FN2081  |                        |                      |          |          |      | 20   |            | 25.8980   | AAL94165.1  ABC transporter substrate-binding protein      |                         |    |    |   |   |   |   |
| FN2082  | 0.195                  | 21.152               | 1.292e-2 | 6.282e-2 | 1156 | 1045 | 1504.6687  | 1353.1708 | AAL94166.1  Formate--tetrahydrofolate ligase               |                         |    |    |   |   |   |   |
| FN2093  | -1.909                 | 9.515                | 7.33e-5  | 1.061e-4 | 13   | 41   | 16.9210    | 53.0909   | AAL94177.1  General secretion pathway protein G            |                         |    |    |   |   |   |   |
| FN2098  |                        |                      |          |          | 7    |      | 9.1113     |           | AAL94182.1  MRP-family nucleotide-binding protein          |                         |    |    |   |   |   |   |
| FN2100  | -1.352                 | 10.984               | 5.926e-8 | 2.217e-9 | 21   | 56   | 27.3339    | 72.5144   | AAL94184.1  Hypothetical protein                           |                         |    |    |   |   |   |   |
| FN2102  | 0.005                  | 9.342                | 1.537e-1 | 9.65e-1  | 20   | 22   | 26.0323    | 28.4878   | AAL94186.1  ABC transporter ATP-binding protein            |                         |    |    |   |   |   |   |
| FN2103  | -0.489                 | 19.701               | 5.074e-4 | 1.251e-3 | 651  | 873  | 847.3524   | 1130.4479 | AAL94187.1  tricarboxylate-binding protein                 |                         |    |    |   |   |   |   |
| FN2105  |                        |                      |          |          |      | 12   |            | 15.5388   | AAL94189.1  tricarboxylate transport membrane protein RctA |                         |    |    |   |   |   |   |
| FN2106  | -0.528                 | 14.281               | 5.001e-4 | 1.227e-3 | 96   | 131  | 124.9552   | 169.6319  | AAL94190.1  Transporter                                    |                         |    |    |   |   |   |   |

Show detected proteins only  
 Show all proteins  
 Filter by category:

Proteins found: 1358

Test Cutoff

| Signif | Direction | Applies To   |
|--------|-----------|--------------|
| yes    | +         | ratios, bars |
| no     | n/a       | bars         |
| yes    | -         | ratios, bars |
| yes    | +         | p-, q-Values |
| yes    | -         |              |

Fn Summary Table

FnPg vs Fn

FnSg vs Fn

FnPgSg vs Fn

FnPgSg vs FnPg

FnSg vs FnPg

FnPgSg vs FnSg

Fn Coverage

| Protein | FnSg vs Fn             |                      |          |          | Raw  |     | Normalized |          | Description                                                    | Log <sub>2</sub> Ratios |    |    |   |   |   |   |
|---------|------------------------|----------------------|----------|----------|------|-----|------------|----------|----------------------------------------------------------------|-------------------------|----|----|---|---|---|---|
|         | Log <sub>2</sub> Ratio | Log <sub>2</sub> Sum | q-Value  | p-Value  | FnSg | Fn  | FnSg       | Fn       |                                                                | -6                      | -4 | -2 | 0 | 2 | 4 | 6 |
| FN2107  | -2.959                 | 10.249               | 4.61e-4  | 1.104e-3 | 10   | 66  | 13.0162    | 85.4634  | AAL94191.1  Galactokinase                                      |                         |    |    |   |   |   |   |
|         |                        |                      |          |          | 12   | 78  | 12.0000    | 109.0760 |                                                                |                         |    |    |   |   |   |   |
| FN2108  | -1.343                 | 9.826                | 9.941e-4 | 2.957e-3 | 16   | 32  | 20.8259    | 41.4368  | AAL94192.1  Galactose-1-phosphate uridylyltransferase          |                         |    |    |   |   |   |   |
|         |                        |                      |          |          | 17   | 39  | 17.0000    | 54.5380  |                                                                |                         |    |    |   |   |   |   |
| FN2109  | -0.173                 | 11.703               | 9.735e-3 | 4.533e-2 | 39   | 45  | 50.7630    | 58.2705  | AAL94193.1  UDP-glucose 4-epimerase                            |                         |    |    |   |   |   |   |
|         |                        |                      |          |          | 58   | 46  | 58.0000    | 64.3268  |                                                                |                         |    |    |   |   |   |   |
| FN2116  | -2.952                 | 10.112               | 5.602e-6 | 2.29e-6  | 13   | 76  | 16.9210    | 98.4124  | AAL94200.1  Hypothetical exported 24-amino acid repeat protein |                         |    |    |   |   |   |   |
|         |                        |                      |          |          | 7    | 62  | 7.0000     | 86.7014  |                                                                |                         |    |    |   |   |   |   |
| FN2117  | -1.371                 | 7.711                |          |          |      | 23  |            | 29.7827  | AAL94201.1  Hypothetical exported 24-amino acid repeat protein |                         |    |    |   |   |   |   |
|         |                        |                      |          |          | 9    | 12  | 9.0000     | 16.7809  |                                                                |                         |    |    |   |   |   |   |
| FN2118  | -3.296                 | 8.466                |          |          |      | 50  |            | 64.7450  | AAL94202.1  Hypothetical exported 24-amino acid repeat protein |                         |    |    |   |   |   |   |
|         |                        |                      |          |          | 6    | 38  | 6.0000     | 53.1396  |                                                                |                         |    |    |   |   |   |   |
| FN2119  | -1.111                 | 9.452                | 7.31e-4  | 2.023e-3 | 10   | 32  | 13.0162    | 41.4368  | AAL94203.1  Hypothetical exported 24-amino acid repeat protein |                         |    |    |   |   |   |   |
|         |                        |                      |          |          | 23   | 26  | 23.0000    | 36.3587  |                                                                |                         |    |    |   |   |   |   |
| FN2120  |                        |                      |          |          |      | 24  |            | 31.0776  | AAL94204.1  Hypothetical exported 24-amino acid repeat protein |                         |    |    |   |   |   |   |
|         |                        |                      |          |          |      | 30  |            | 41.9523  |                                                                |                         |    |    |   |   |   |   |
| FN2121  | -4.149                 | 11.554               |          |          | 10   | 171 | 13.0162    | 221.4279 | AAL94205.1  Hypothetical exported 24-amino acid repeat protein |                         |    |    |   |   |   |   |
|         |                        |                      |          |          |      | 172 |            | 240.5265 |                                                                |                         |    |    |   |   |   |   |
| FN2122  | -0.033                 | 16.936               | 3.383e-2 | 1.829e-1 | 275  | 280 | 357.9446   | 362.5721 | AAL94206.1  Phenylalanyl-tRNA synthetase beta chain            |                         |    |    |   |   |   |   |
|         |                        |                      |          |          | 342  | 253 | 342.0000   | 353.7977 |                                                                |                         |    |    |   |   |   |   |
| FN2123  | 0.116                  | 13.623               | 1.097e-1 | 6.545e-1 | 66   | 77  | 85.9067    | 99.7073  | AAL94207.1  Phenylalanyl-tRNA synthetase alpha chain           |                         |    |    |   |   |   |   |
|         |                        |                      |          |          | 148  | 83  | 148.0000   | 116.0680 |                                                                |                         |    |    |   |   |   |   |
| FN2125  | -1.475                 | 13.917               | 6.497e-5 | 8.833e-5 | 57   | 154 | 74.1921    | 199.4146 | AAL94209.1  DNA gyrase subunit A                               |                         |    |    |   |   |   |   |
|         |                        |                      |          |          | 75   | 154 | 75.0000    | 215.3551 |                                                                |                         |    |    |   |   |   |   |
| FN2126  | -2.209                 | 11.693               | 9.972e-5 | 1.558e-4 | 15   | 95  | 19.5242    | 123.0155 | AAL94210.1  DNA gyrase subunit B                               |                         |    |    |   |   |   |   |
|         |                        |                      |          |          | 34   | 89  | 34.0000    | 124.4585 |                                                                |                         |    |    |   |   |   |   |
| FN2128  |                        |                      |          |          |      | 3   |            | 3.8847   | AAL94212.1  RECF protein                                       |                         |    |    |   |   |   |   |
|         |                        |                      |          |          |      |     |            |          |                                                                |                         |    |    |   |   |   |   |

Show detected proteins only  
 Show all proteins  
 Filter by category:

Proteins found: 1358

Enter (or paste) list of ORFs

Find ORFs

Test Cutoff

q-Value

p-Value

.005

| Signif | Direction | Applies To   |
|--------|-----------|--------------|
| yes    | +         | ratios, bars |
| no     | n/a       | bars         |
| yes    | -         | ratios, bars |
| yes    | +         | p-, q-Values |
| yes    | -         | p-, q-Values |

Dot Plots
