# Supplementary material for: Proteomics of Fusobacterium nucleatum within a model developing oral microbial community
Source: PubMed Central journal article supplement (PMC4234264; doi:10.1002/mbo3.204), 2014-08-25
Supplement: mbo30003-0729-sd10.pdf [file mbo30003-0729-sd10.pdf]

Fn Summary Table FnPg vs Fn FnSg vs Fn FnPgSg vs Fn FnPgSg vs FnPg FnSg vs FnPg FnPgSg vs FnSg Fn Coverage

| Protein | FnPgSg vs FnPg         |                      |          |          | Raw    |      | Normalized |          | Description                                                    | Log <sub>2</sub> Ratios |    |    |   |   |   |   |
|---------|------------------------|----------------------|----------|----------|--------|------|------------|----------|----------------------------------------------------------------|-------------------------|----|----|---|---|---|---|
|         | Log <sub>2</sub> Ratio | Log <sub>2</sub> Sum | q-Value  | p-Value  | FnPgSg | FnPg | FnPgSg     | FnPg     |                                                                | -6                      | -4 | -2 | 0 | 2 | 4 | 6 |
| FN0001  | -1.135                 | 6.216                | 1e-1     | 2.195e-1 | 7      | 15   | 7.5124     | 20.5521  | AAL94214.1  Chromosomal replication initiator protein dnaA     |                         |    |    |   |   |   |   |
|         |                        |                      |          |          | 3      | 5    | 4.1251     | 5.0000   |                                                                |                         |    |    |   |   |   |   |
| FN0004  | 1.354                  | 12.583               |          |          | 145    |      | 155.6134   |          | AAL94217.1  Inner membrane protein                             |                         |    |    |   |   |   |   |
|         |                        |                      |          |          | 69     | 49   | 94.8764    | 49.0000  |                                                                |                         |    |    |   |   |   |   |
| FN0005  | 2.402                  | 9.430                | 1.077e-4 | 9.734e-6 | 60     | 5    | 64.3917    | 6.8507   | AAL94218.1  Jag protein                                        |                         |    |    |   |   |   |   |
|         |                        |                      |          |          | 41     | 16   | 56.3758    | 16.0000  |                                                                |                         |    |    |   |   |   |   |
| FN0006  | -0.797                 | 7.988                |          |          | 11     |      | 11.8052    |          | AAL94219.1  Thiophene and furan oxidation protein THDF         |                         |    |    |   |   |   |   |
|         |                        |                      |          |          | 9      | 21   | 12.3752    | 21.0000  |                                                                |                         |    |    |   |   |   |   |
| FN0007  | -0.200                 | 6.476                | 1.591e-1 | 4.339e-1 | 10     | 6    | 10.7320    | 8.2208   | AAL94220.1  Glucose inhibited division protein A               |                         |    |    |   |   |   |   |
|         |                        |                      |          |          | 5      | 12   | 6.8751     | 12.0000  |                                                                |                         |    |    |   |   |   |   |
| FN0008  |                        |                      |          |          |        |      |            |          | AAL94221.1  Quinolinate synthetase A                           |                         |    |    |   |   |   |   |
|         |                        |                      |          |          |        | 13   |            | 13.0000  |                                                                |                         |    |    |   |   |   |   |
| FN0009  |                        |                      |          |          |        |      |            |          | AAL94222.1  L-aspartate oxidase                                |                         |    |    |   |   |   |   |
|         |                        |                      |          |          |        | 29   |            | 29.0000  |                                                                |                         |    |    |   |   |   |   |
| FN0018  | 0.731                  | 9.778                |          |          | 34     |      | 36.4887    |          | AAL94231.1  Hypothetical protein                               |                         |    |    |   |   |   |   |
|         |                        |                      |          |          | 29     | 23   | 39.8756    | 23.0000  |                                                                |                         |    |    |   |   |   |   |
| FN0019  |                        |                      |          |          |        |      |            |          | AAL94232.1  Transcription-repair coupling factor               |                         |    |    |   |   |   |   |
|         |                        |                      |          |          | 4      |      | 5.5001     |          |                                                                |                         |    |    |   |   |   |   |
| FN0022  | -1.261                 | 11.838               | 1.31e-1  | 3.315e-1 | 28     | 128  | 30.0495    | 175.3779 | AAL94235.1  Hypothetical protein                               |                         |    |    |   |   |   |   |
|         |                        |                      |          |          | 35     | 12   | 48.1257    | 12.0000  |                                                                |                         |    |    |   |   |   |   |
| FN0023  | 0.322                  | 7.241                |          |          |        |      |            |          | AAL94236.1  Short-chain fatty acids transporter                |                         |    |    |   |   |   |   |
|         |                        |                      |          |          | 10     | 11   | 13.7502    | 11.0000  |                                                                |                         |    |    |   |   |   |   |
| FN0024  | 0.902                  | 8.830                | 3.244e-2 | 4.269e-2 | 30     | 6    | 32.1959    | 8.2208   | AAL94237.1  Hypothetical exported 24-amino acid repeat protein |                         |    |    |   |   |   |   |
|         |                        |                      |          |          | 19     | 23   | 26.1254    | 23.0000  |                                                                |                         |    |    |   |   |   |   |
| FN0025  | 0.459                  | 6.074                |          |          |        |      |            |          | AAL94238.1  Hypothetical exported 24-amino acid repeat protein |                         |    |    |   |   |   |   |
|         |                        |                      |          |          | 7      | 7    | 9.6251     | 7.0000   |                                                                |                         |    |    |   |   |   |   |
| FN0026  |                        |                      |          |          | 40     |      | 42.9278    |          | AAL94239.1  Hypothetical exported 24-amino acid repeat protein |                         |    |    |   |   |   |   |
|         |                        |                      |          |          | 20     |      | 27.5004    |          |                                                                |                         |    |    |   |   |   |   |
| FN0029  |                        |                      |          |          | 5      |      | 5.3660     |          | AAL94242.1  Flavodoxin                                         |                         |    |    |   |   |   |   |
|         |                        |                      |          |          |        |      |            |          |                                                                |                         |    |    |   |   |   |   |
| FN0030  | -0.969                 | 12.713               | 2.885e-2 | 3.595e-2 | 63     | 63   | 67.6113    | 86.3188  | AAL94243.1  5-nitroimidazole antibiotic resistance protein     |                         |    |    |   |   |   |   |
|         |                        |                      |          |          | 36     | 143  | 49.5007    | 143.0000 |                                                                |                         |    |    |   |   |   |   |

Show detected proteins only  
 Show all proteins  
 Filter by category:  
 GO: amino acid transport

Proteins found:  
1305

Enter (or paste) list of ORFs

Test Cutoff  
  
 .005

| Signif | Direction | Applies To   |
|--------|-----------|--------------|
| yes    | +         | ratios, bars |
| no     | n/a       | bars         |
| yes    | -         | ratios, bars |
| yes    | +         | p-, q-Values |
| yes    | -         | p-, q-Values |

Fn Summary Table FnPg vs Fn FnSg vs Fn FnPgSg vs FnPg FnPgSg vs FnPg FnSg vs FnPg FnPgSg vs FnSg Fn Coverage

| Protein | FnPgSg vs FnPg         |                      |          |          | Raw    |      | Normalized |          | Description                                                              | Log <sub>2</sub> Ratios |    |    |   |   |   |   |
|---------|------------------------|----------------------|----------|----------|--------|------|------------|----------|--------------------------------------------------------------------------|-------------------------|----|----|---|---|---|---|
|         | Log <sub>2</sub> Ratio | Log <sub>2</sub> Sum | q-Value  | p-Value  | FnPgSg | FnPg | FnPgSg     | FnPg     |                                                                          | -6                      | -4 | -2 | 0 | 2 | 4 | 6 |
| FN0031  | -1.429                 | 8.250                | 8.203e-3 | 5.576e-3 | 7      | 25   | 7.5124     | 34.2535  | AAL94244.1  unknown                                                      |                         |    |    |   |   |   |   |
|         |                        |                      |          |          | 10     | 23   | 13.7502    | 23.0000  |                                                                          |                         |    |    |   |   |   |   |
| FN0033  | -0.485                 | 11.626               | 1.056e-1 | 2.401e-1 | 45     | 65   | 48.2938    | 89.0591  | AAL94246.1  unknown                                                      |                         |    |    |   |   |   |   |
|         |                        |                      |          |          | 34     | 44   | 46.7507    | 44.0000  |                                                                          |                         |    |    |   |   |   |   |
| FN0034  | 0.587                  | 10.302               | 3.262e-2 | 4.304e-2 | 44     | 27   | 47.2206    | 36.9938  | AAL94247.1  unknown                                                      |                         |    |    |   |   |   |   |
|         |                        |                      |          |          | 29     | 21   | 39.8756    | 21.0000  |                                                                          |                         |    |    |   |   |   |   |
| FN0038  |                        |                      |          |          |        | 77   |            | 105.5008 | AAL94251.1  unknown                                                      |                         |    |    |   |   |   |   |
| FN0039  |                        |                      |          |          |        |      |            |          | AAL94252.1  DNA primase (bacterial type) and small primase-like proteins |                         |    |    |   |   |   |   |
| FN0040  | -0.137                 | 17.908               | 1.011e-1 | 2.234e-1 | 424    | 341  | 455.0350   | 467.2177 | AAL94253.1  Asparaginyl-tRNA synthetase                                  |                         |    |    |   |   |   |   |
|         |                        |                      |          |          | 357    | 573  | 490.8824   | 573.0000 |                                                                          |                         |    |    |   |   |   |   |
| FN0041  | 0.127                  | 5.742                |          |          | 4      |      | 4.2928     |          | AAL94254.1  unknown                                                      |                         |    |    |   |   |   |   |
|         |                        |                      |          |          | 8      | 7    | 11.0002    | 7.0000   |                                                                          |                         |    |    |   |   |   |   |
| FN0043  | -0.898                 | 5.102                |          |          | 4      |      | 4.2928     |          | AAL94256.1  Hypothetical exported 24-amino acid repeat protein           |                         |    |    |   |   |   |   |
|         |                        |                      |          |          |        | 8    |            | 8.0000   |                                                                          |                         |    |    |   |   |   |   |
| FN0046  | 0.683                  | 6.236                |          |          |        | 5    |            | 6.8507   | AAL94259.1  3-dehydroquinate dehydratase                                 |                         |    |    |   |   |   |   |
|         |                        |                      |          |          | 8      |      | 11.0002    |          |                                                                          |                         |    |    |   |   |   |   |
| FN0047  | 0.362                  | 12.015               | 5.7e-2   | 9.732e-2 | 68     | 50   | 72.9773    | 68.5070  | AAL94260.1  Exodeoxyribonuclease III                                     |                         |    |    |   |   |   |   |
|         |                        |                      |          |          | 53     | 45   | 72.8761    | 45.0000  |                                                                          |                         |    |    |   |   |   |   |
| FN0048  | 0.432                  | 7.715                | 1.458e-2 | 1.347e-2 | 16     | 8    | 17.1711    | 10.9611  | AAL94261.1  4-nitrophenylphosphatase                                     |                         |    |    |   |   |   |   |
|         |                        |                      |          |          | 12     | 14   | 16.5002    | 14.0000  |                                                                          |                         |    |    |   |   |   |   |
| FN0049  |                        |                      |          |          |        | 9    |            | 12.3313  | AAL94262.1  Hypothetical protein                                         |                         |    |    |   |   |   |   |
|         |                        |                      |          |          |        | 31   |            | 31.0000  |                                                                          |                         |    |    |   |   |   |   |
| FN0050  | 1.779                  | 18.713               | 7.945e-3 | 5.254e-3 | 906    | 194  | 972.3154   | 265.8071 | AAL94263.1  Fumarate reductase flavoprotein subunit                      |                         |    |    |   |   |   |   |
|         |                        |                      |          |          | 1059   | 442  | 1456.1470  | 442.0000 |                                                                          |                         |    |    |   |   |   |   |
| FN0052  | 0.645                  | 8.723                |          |          | 21     | 12   | 22.5371    | 16.4417  | AAL94265.1  Arsenate reductase                                           |                         |    |    |   |   |   |   |
|         |                        |                      |          |          | 21     |      | 28.8754    |          |                                                                          |                         |    |    |   |   |   |   |
| FN0054  | 0.836                  | 14.613               | 2.865e-2 | 3.557e-2 | 193    | 54   | 207.1268   | 73.9876  | AAL94267.1  Tyrosyl-tRNA synthetase                                      |                         |    |    |   |   |   |   |
|         |                        |                      |          |          | 157    | 163  | 215.8783   | 163.0000 |                                                                          |                         |    |    |   |   |   |   |
| FN0058  | -0.746                 | 14.267               | 1.756e-2 | 1.775e-2 | 106    | 153  | 113.7587   | 209.6314 | AAL94271.1  Cysteine desulfhydrase                                       |                         |    |    |   |   |   |   |
|         |                        |                      |          |          | 75     | 154  | 103.1266   | 154.0000 |                                                                          |                         |    |    |   |   |   |   |

Show detected proteins only  
 Show all proteins  
 Filter by category:  
 GO: amino acid transport

Proteins found:  
1305

Enter (or paste) list of ORFs

Find ORFs

Test Cutoff

q-Value

p-Value

.005

| Signif      | Direction | Applies To |
|-------------|-----------|------------|
| red         | yes       | +          |
| yellow      | no        | n/a        |
| green       | yes       | -          |
| pink        | yes       | +          |
| light green | yes       | -          |

ratios, bars  
ratios, bars  
ratios, bars  
p-, q-Values

Dot Plots Dot Plots

Fn Summary Table FnPg vs Fn FnSg vs Fn FnPgSg vs Fn FnPgSg vs FnPg FnSg vs FnPg FnPgSg vs FnSg Fn Coverage

| Protein | FnPgSg vs FnPg         |                      |          |          | Raw    |      | Normalized |          | Description                                                                      | Log <sub>2</sub> Ratios |    |    |   |   |   |   |
|---------|------------------------|----------------------|----------|----------|--------|------|------------|----------|----------------------------------------------------------------------------------|-------------------------|----|----|---|---|---|---|
|         | Log <sub>2</sub> Ratio | Log <sub>2</sub> Sum | q-Value  | p-Value  | FnPgSg | FnPg | FnPgSg     | FnPg     |                                                                                  | -6                      | -4 | -2 | 0 | 2 | 4 | 6 |
| FN0059  | 0.859                  | 9.963                | 9.856e-4 | 2.352e-4 | 37     | 16   | 39.7082    | 21.9222  | AAL94272.1  NifU protein                                                         |                         |    |    |   |   |   |   |
|         |                        |                      |          |          | 33     | 25   | 45.3757    | 25.0000  |                                                                                  |                         |    |    |   |   |   |   |
| FN0060  | 1.047                  | 7.669                | 1.152e-2 | 9.384e-3 | 19     | 5    | 20.3907    | 6.8507   | AAL94273.1  D-alanyl-D-alanine carboxypeptidase                                  |                         |    |    |   |   |   |   |
|         |                        |                      |          |          | 15     | 13   | 20.6253    | 13.0000  |                                                                                  |                         |    |    |   |   |   |   |
| FN0061  | -0.075                 | 12.801               | 2.744e-1 | 9.066e-1 | 74     | 20   | 79.4165    | 27.4028  | AAL94274.1  Thermostable carboxypeptidase 1                                      |                         |    |    |   |   |   |   |
|         |                        |                      |          |          | 62     | 146  | 85.2513    | 146.0000 |                                                                                  |                         |    |    |   |   |   |   |
| FN0062  | 1.277                  | 6.447                |          |          | 13     |      | 13.9515    |          | AAL94275.1  Hypothetical cytosolic protein                                       |                         |    |    |   |   |   |   |
|         |                        |                      |          |          | 11     | 6    | 15.1252    | 6.0000   |                                                                                  |                         |    |    |   |   |   |   |
| FN0065  | 0.513                  | 12.942               | 1.35e-3  | 3.901e-4 | 95     | 50   | 101.9536   | 68.5070  | AAL94278.1  Transcription accessory protein (S1 RNA binding domain)              |                         |    |    |   |   |   |   |
|         |                        |                      |          |          | 80     | 80   | 110.0017   | 80.0000  |                                                                                  |                         |    |    |   |   |   |   |
| FN0067  | 0.458                  | 16.642               | 2.677e-2 | 3.218e-2 | 341    | 234  | 365.9598   | 320.6127 | AAL94280.1  Isoleucyl-tRNA synthetase                                            |                         |    |    |   |   |   |   |
|         |                        |                      |          |          | 279    | 225  | 383.6308   | 225.0000 |                                                                                  |                         |    |    |   |   |   |   |
| FN0069  | -0.457                 | 15.217               | 5.162e-2 | 8.355e-2 | 163    | 198  | 174.9309   | 271.2877 | AAL94282.1  Glycyl-tRNA synthetase alpha chain                                   |                         |    |    |   |   |   |   |
|         |                        |                      |          |          | 115    | 186  | 158.1274   | 186.0000 |                                                                                  |                         |    |    |   |   |   |   |
| FN0070  | -0.161                 | 17.077               | 1.322e-1 | 3.363e-1 | 326    | 241  | 349.8618   | 330.2037 | AAL94283.1  Glycyl-tRNA synthetase beta chain                                    |                         |    |    |   |   |   |   |
|         |                        |                      |          |          | 257    | 456  | 353.3803   | 456.0000 |                                                                                  |                         |    |    |   |   |   |   |
| FN0071  |                        |                      |          |          |        |      |            |          | AAL94284.1  GTP cyclohydrolase I                                                 |                         |    |    |   |   |   |   |
|         |                        |                      |          |          |        | 8    |            | 8.0000   |                                                                                  |                         |    |    |   |   |   |   |
| FN0072  | -0.643                 | 12.460               | 9.599e-2 | 2.054e-1 | 53     | 42   | 56.8794    | 57.5459  | AAL94285.1  2-amino-4-hydroxy-6-hydroxymethylidihydropteridine pyrophosphokinase |                         |    |    |   |   |   |   |
|         |                        |                      |          |          | 46     | 130  | 63.2510    | 130.0000 |                                                                                  |                         |    |    |   |   |   |   |
| FN0073  | -0.323                 | 8.984                | 1.884e-1 | 5.471e-1 | 17     | 9    | 18.2443    | 12.3313  | AAL94286.1  Dihydropteroate synthase                                             |                         |    |    |   |   |   |   |
|         |                        |                      |          |          | 16     | 38   | 22.0003    | 38.0000  |                                                                                  |                         |    |    |   |   |   |   |
| FN0074  | -0.439                 | 7.561                |          |          | 11     |      | 11.8052    |          | AAL94287.1  Ethanolamine utilization protein eutS                                |                         |    |    |   |   |   |   |
|         |                        |                      |          |          |        | 16   |            | 16.0000  |                                                                                  |                         |    |    |   |   |   |   |
| FN0076  |                        |                      |          |          |        |      |            |          | AAL94289.1  Ethanolamine two-component response regulator                        |                         |    |    |   |   |   |   |
|         |                        |                      |          |          |        | 4    |            | 4.0000   |                                                                                  |                         |    |    |   |   |   |   |
| FN0077  |                        |                      |          |          |        |      |            |          | AAL94290.1  Ethanolamine two-component sensor kinase                             |                         |    |    |   |   |   |   |
|         |                        |                      |          |          |        | 3    |            | 3.0000   |                                                                                  |                         |    |    |   |   |   |   |
| FN0078  | -2.092                 | 7.626                | 8.903e-4 | 2.004e-4 | 5      | 19   | 5.3660     | 26.0327  | AAL94291.1  Ethanolamine utilization protein eutA                                |                         |    |    |   |   |   |   |
|         |                        |                      |          |          | 6      | 32   | 8.2501     | 32.0000  |                                                                                  |                         |    |    |   |   |   |   |
| FN0079  | -2.464                 | 12.415               | 5.957e-2 | 1.037e-1 | 33     | 49   | 35.4155    | 67.1369  | AAL94292.1  Ethanolamine ammonia-lyase heavy chain                               |                         |    |    |   |   |   |   |
|         |                        |                      |          |          | 20     | 280  | 27.5004    | 280.0000 |                                                                                  |                         |    |    |   |   |   |   |

Show detected proteins only  
 Show all proteins  
 Filter by category:

Proteins found: 1305

Enter (or paste) list of ORFs

Find ORFs

Test Cutoff

q-Value

p-Value

.005

| Signif | Direction | Applies To   |
|--------|-----------|--------------|
| yes    | +         | ratios, bars |
| no     | n/a       | bars         |
| yes    | -         | ratios, bars |
| yes    | +         | p-, q-Values |
| yes    | -         | p-, q-Values |

Dot Plots Dot Plots

Fn Summary Table FnPg vs Fn FnSg vs Fn FnPgSg vs Fn FnPgSg vs FnPg FnSg vs FnPg FnPgSg vs FnSg Fn Coverage

| Protein | FnPgSg vs FnPg         |                      |          |          | Raw    |      | Normalized |          | Description                                                  | Log <sub>2</sub> Ratios |    |    |   |   |   |   |
|---------|------------------------|----------------------|----------|----------|--------|------|------------|----------|--------------------------------------------------------------|-------------------------|----|----|---|---|---|---|
|         | Log <sub>2</sub> Ratio | Log <sub>2</sub> Sum | q-Value  | p-Value  | FnPgSg | FnPg | FnPgSg     | FnPg     |                                                              | -6                      | -4 | -2 | 0 | 2 | 4 | 6 |
| FN0080  | -1.834                 | 13.691               | 3.228e-6 | 6.998e-8 | 52     | 163  | 55.8062    | 223.3328 | AAL94293.1  Ethanolamine ammonia-lyase light chain           |                         |    |    |   |   |   |   |
|         |                        |                      |          |          | 48     | 211  | 66.0010    | 211.0000 |                                                              |                         |    |    |   |   |   |   |
| FN0081  | -2.656                 | 12.749               | 3.831e-2 | 5.419e-2 | 27     | 80   | 28.9763    | 109.6112 | AAL94294.1  Ethanolamine utilization protein eutL            |                         |    |    |   |   |   |   |
|         |                        |                      |          |          | 27     | 307  | 37.1256    | 307.0000 |                                                              |                         |    |    |   |   |   |   |
| FN0082  | -0.522                 | 9.292                |          |          | 21     |      | 22.5371    |          | AAL94295.1  Ethanolamine utilization protein eutM            |                         |    |    |   |   |   |   |
|         |                        |                      |          |          | 14     | 30   | 19.2503    | 30.0000  |                                                              |                         |    |    |   |   |   |   |
| FN0083  | -2.079                 | 14.531               | 4.203e-2 | 6.167e-2 | 78     | 126  | 83.7093    | 172.6376 | AAL94296.1  Ethanolamine utilization protein eutM precursor  |                         |    |    |   |   |   |   |
|         |                        |                      |          |          | 48     | 460  | 66.0010    | 460.0000 |                                                              |                         |    |    |   |   |   |   |
| FN0084  | -1.048                 | 9.943                | 4.175e-3 | 1.977e-3 | 24     | 33   | 25.7567    | 45.2146  | AAL94297.1  Acetaldehyde dehydrogenase (acetylating)         |                         |    |    |   |   |   |   |
|         |                        |                      |          |          | 13     | 45   | 17.8753    | 45.0000  |                                                              |                         |    |    |   |   |   |   |
| FN0086  |                        |                      |          |          |        |      |            | 9.5910   | AAL94299.1  Hypothetical protein                             |                         |    |    |   |   |   |   |
|         |                        |                      |          |          |        |      |            |          |                                                              |                         |    |    |   |   |   |   |
| FN0087  |                        |                      |          |          |        |      |            | 17.8118  | AAL94300.1  Ethanolamine utilization protein eutN            |                         |    |    |   |   |   |   |
|         |                        |                      |          |          |        |      |            |          |                                                              |                         |    |    |   |   |   |   |
| FN0089  |                        |                      |          |          | 4      |      | 4.2928     |          | AAL94302.1  Ethanolamine permease                            |                         |    |    |   |   |   |   |
|         |                        |                      |          |          |        |      |            |          |                                                              |                         |    |    |   |   |   |   |
| FN0090  |                        |                      |          |          |        |      |            | 12.3313  | AAL94303.1  Ethanolamine utilization protein eutQ            |                         |    |    |   |   |   |   |
|         |                        |                      |          |          |        |      |            | 6.0000   |                                                              |                         |    |    |   |   |   |   |
| FN0091  |                        |                      |          |          |        |      |            | 8.2208   | AAL94304.1  Phosphoserine phosphatase                        |                         |    |    |   |   |   |   |
|         |                        |                      |          |          |        |      |            |          |                                                              |                         |    |    |   |   |   |   |
| FN0092  | -2.272                 | 8.900                | 7.374e-2 | 1.389e-1 | 7      | 11   | 7.5124     | 15.0715  | AAL94305.1  NADPH-dependent butanol dehydrogenase            |                         |    |    |   |   |   |   |
|         |                        |                      |          |          | 9      | 81   | 12.3752    | 81.0000  |                                                              |                         |    |    |   |   |   |   |
| FN0093  | 0.798                  | 16.047               | 1.861e-4 | 2.318e-5 | 305    | 153  | 327.3247   | 209.6314 | AAL94306.1  Thioredoxin                                      |                         |    |    |   |   |   |   |
|         |                        |                      |          |          | 261    | 185  | 358.8804   | 185.0000 |                                                              |                         |    |    |   |   |   |   |
| FN0100  | 0.886                  | 8.609                | 3.179e-3 | 1.339e-3 | 27     | 11   | 28.9763    | 15.0715  | AAL94309.1  Flavodoxins/hemoproteins                         |                         |    |    |   |   |   |   |
|         |                        |                      |          |          | 18     | 14   | 24.7504    | 14.0000  |                                                              |                         |    |    |   |   |   |   |
| FN0102  |                        |                      |          |          | 5      |      | 5.3660     |          | AAL94311.1  Ribonucleoside-diphosphate reductase alpha chain |                         |    |    |   |   |   |   |
|         |                        |                      |          |          | 8      |      | 11.0002    |          |                                                              |                         |    |    |   |   |   |   |
| FN0103  |                        |                      |          |          | 4      |      | 4.2928     |          | AAL94312.1  Ribonucleoside-diphosphate reductase beta chain  |                         |    |    |   |   |   |   |
|         |                        |                      |          |          |        |      |            |          |                                                              |                         |    |    |   |   |   |   |
| FN0106  | -0.359                 | 13.873               | 1.242e-2 | 1.048e-2 | 94     | 93   | 100.8804   | 127.4230 | AAL94315.1  Hypothetical protein                             |                         |    |    |   |   |   |   |
|         |                        |                      |          |          | 84     | 150  | 115.5017   | 150.0000 |                                                              |                         |    |    |   |   |   |   |

Show detected proteins only  
 Show all proteins  
 Filter by category:

Proteins found:  
1305

Test Cutoff

| Signif | Direction | Applies To   |
|--------|-----------|--------------|
| yes    | +         | ratios, bars |
| no     | n/a       | bars         |
| yes    | -         | ratios, bars |
| yes    | +         | p-, q-Values |
| yes    | -         |              |

Fn Summary Table FnPg vs Fn FnSg vs Fn FnPgSg vs Fn FnPgSg vs FnPg FnSg vs FnPg FnPgSg vs FnSg Fn Coverage

| Protein | FnPgSg vs FnPg         |                      |          |          | Raw    |      | Normalized |           | Description                                               | Log <sub>2</sub> Ratios |    |    |   |   |   |   |
|---------|------------------------|----------------------|----------|----------|--------|------|------------|-----------|-----------------------------------------------------------|-------------------------|----|----|---|---|---|---|
|         | Log <sub>2</sub> Ratio | Log <sub>2</sub> Sum | q-Value  | p-Value  | FnPgSg | FnPg | FnPgSg     | FnPg      |                                                           | -6                      | -4 | -2 | 0 | 2 | 4 | 6 |
| FN0108  | -1.507                 | 8.051                |          |          | 9      | 16   | 9.6588     | 21.9222   | AAL94317.1  Microcin C7 self-immunity protein mccF        |                         |    |    |   |   |   |   |
|         |                        |                      |          |          |        |      |            | 33        |                                                           | 33.0000                 |    |    |   |   |   |   |
| FN0110  | -0.302                 | 17.590               | 1.079e-1 | 2.49e-1  | 342    | 442  | 367.0329   | 605.6018  | AAL94319.1  Seryl-tRNA synthetase                         |                         |    |    |   |   |   |   |
|         |                        |                      |          |          | 315    | 381  | 433.1315   | 381.0000  |                                                           |                         |    |    |   |   |   |   |
| FN0111  |                        |                      |          |          |        |      |            |           | AAL94320.1  unknown                                       |                         |    |    |   |   |   |   |
|         |                        |                      |          |          |        |      |            | 5         |                                                           | 5.0000                  |    |    |   |   |   |   |
| FN0113  | -2.117                 | 10.223               | 2.542e-3 | 9.639e-4 | 13     | 46   | 13.9515    | 63.0264   | AAL94322.1  Heat-inducible transcription repressor hrcA   |                         |    |    |   |   |   |   |
|         |                        |                      |          |          | 14     | 81   | 19.2503    | 81.0000   |                                                           |                         |    |    |   |   |   |   |
| FN0114  | 0.507                  | 14.093               | 1.711e-2 | 1.713e-2 | 163    | 83   | 174.9309   | 113.7216  | AAL94323.1  GrpE protein                                  |                         |    |    |   |   |   |   |
|         |                        |                      |          |          | 102    | 108  | 140.2521   | 108.0000  |                                                           |                         |    |    |   |   |   |   |
| FN0116  | -0.263                 | 20.290               | 1.638e-1 | 4.51e-1  | 1009   | 604  | 1082.8545  | 827.5645  | AAL94325.1  Chaperone protein dnaK                        |                         |    |    |   |   |   |   |
|         |                        |                      |          |          | 716    | 1653 | 984.5148   | 1653.0000 |                                                           |                         |    |    |   |   |   |   |
| FN0117  |                        |                      |          |          |        |      |            |           | AAL94326.1  O6-methylguanine-DNA methyltransferase        |                         |    |    |   |   |   |   |
|         |                        |                      |          |          |        |      |            | 14        |                                                           | 14.0000                 |    |    |   |   |   |   |
| FN0118  | 0.675                  | 11.837               | 1.078e-2 | 8.521e-3 | 72     | 29   | 77.2701    | 39.7341   | AAL94327.1  Chaperone protein dnaJ                        |                         |    |    |   |   |   |   |
|         |                        |                      |          |          | 55     | 56   | 75.6261    | 56.0000   |                                                           |                         |    |    |   |   |   |   |
| FN0119  |                        |                      |          |          |        |      |            |           | AAL94328.1  Flavodoxin                                    |                         |    |    |   |   |   |   |
|         |                        |                      |          |          |        |      |            | 47        |                                                           | 47.0000                 |    |    |   |   |   |   |
| FN0123  |                        |                      |          |          |        |      |            |           | AAL94332.1  ATPase                                        |                         |    |    |   |   |   |   |
|         |                        |                      |          |          |        |      |            | 5         |                                                           | 5.0000                  |    |    |   |   |   |   |
| FN0127  |                        |                      |          |          |        |      |            |           | AAL94333.1  Fe-S oxidoreductase                           |                         |    |    |   |   |   |   |
|         |                        |                      |          |          |        |      |            | 4         |                                                           | 5.4806                  |    |    |   |   |   |   |
| FN0128  | -0.658                 | 7.437                | 8.064e-3 | 5.4e-3   | 8      | 11   | 8.5856     | 15.0715   | AAL94334.1  Spermidine/putrescine-binding protein         |                         |    |    |   |   |   |   |
|         |                        |                      |          |          | 9      | 18   | 12.3752    | 18.0000   |                                                           |                         |    |    |   |   |   |   |
| FN0130  | 1.028                  | 7.028                |          |          | 24     |      | 25.7567    |           | AAL94336.1  ABC transporter ATP-binding protein           |                         |    |    |   |   |   |   |
|         |                        |                      |          |          | 5      | 8    | 6.8751     | 8.0000    |                                                           |                         |    |    |   |   |   |   |
| FN0132  | 0.803                  | 5.999                | 3.244e-2 | 4.268e-2 | 12     | 3    | 12.8783    | 4.1104    | AAL93916.1  Hemolysin                                     |                         |    |    |   |   |   |   |
|         |                        |                      |          |          | 6      | 8    | 8.2501     | 8.0000    |                                                           |                         |    |    |   |   |   |   |
| FN0147  | 0.129                  | 9.325                | 2.133e-1 | 6.501e-1 | 25     | 12   | 26.8299    | 16.4417   | AAL94353.1  PLSX protein                                  |                         |    |    |   |   |   |   |
|         |                        |                      |          |          | 19     | 32   | 26.1254    | 32.0000   |                                                           |                         |    |    |   |   |   |   |
| FN0148  | 0.123                  | 15.972               | 1.034e-1 | 2.317e-1 | 242    | 159  | 259.7134   | 217.8522  | AAL94354.1  3-oxoacyl-[acyl-carrier-protein] synthase III |                         |    |    |   |   |   |   |
|         |                        |                      |          |          | 196    | 268  | 269.5041   | 268.0000  |                                                           |                         |    |    |   |   |   |   |

Show detected proteins only  
 Show all proteins  
 Filter by category:

Proteins found:  
1305

Test Cutoff

| Signif | Direction | Applies To   |
|--------|-----------|--------------|
| yes    | +         | ratios, bars |
| no     | n/a       | bars         |
| yes    | -         | ratios, bars |
| yes    | +         | p-, q-Values |
| yes    | -         | p-, q-Values |

| Fn Summary Table |                        | FnPg vs Fn           |          | FnSg vs Fn |        | FnPgSg vs Fn |           | FnPgSg vs FnPg |                                                             | FnSg vs FnPg |    | FnPgSg vs FnSg |                         | Fn Coverage |   |   |
|------------------|------------------------|----------------------|----------|------------|--------|--------------|-----------|----------------|-------------------------------------------------------------|--------------|----|----------------|-------------------------|-------------|---|---|
| Protein          | FnPgSg vs FnPg         |                      |          |            | Raw    |              |           |                | Normalized                                                  |              |    |                | Log <sub>2</sub> Ratios |             |   |   |
|                  | Log <sub>2</sub> Ratio | Log <sub>2</sub> Sum | q-Value  | p-Value    | FnPgSg | FnPg         | FnPgSg    | FnPg           | Description                                                 | -6           | -4 | -2             | 0                       | 2           | 4 | 6 |
| FN0149           | 0.068                  | 15.772               | 2.541e-1 | 8.167e-1   | 190    | 219          | 203.9072  | 300.0606       | AAL94355.1  Malonyl-CoA-[acyl-carrier-protein] transacylase |              |    |                |                         |             |   |   |
|                  |                        |                      |          |            | 204    | 162          | 280.5042  | 162.0000       |                                                             |              |    |                |                         |             |   |   |
| FN0150           | 0.548                  | 11.458               | 3.038e-3 | 1.249e-3   | 58     | 29           | 62.2454   | 39.7341        | AAL94356.1  Acyl carrier protein                            |              |    |                |                         |             |   |   |
|                  |                        |                      |          |            | 48     | 48           | 66.0010   | 48.0000        |                                                             |              |    |                |                         |             |   |   |
| FN0151           | 0.776                  | 19.246               | 5.85e-2  | 1.01e-1    | 893    | 205          | 958.3638  | 280.8787       | AAL94357.1  3-oxoacyl-[acyl-carrier-protein] synthase       |              |    |                |                         |             |   |   |
|                  |                        |                      |          |            | 804    | 924          | 1105.5167 | 924.0000       |                                                             |              |    |                |                         |             |   |   |
| FN0152           | -0.219                 | 5.781                |          |            |        |              |           |                | AAL94358.1  Ribonuclease III                                |              |    |                |                         |             |   |   |
|                  |                        |                      |          |            | 5      | 8            | 6.8751    | 8.0000         |                                                             |              |    |                |                         |             |   |   |
| FN0154           |                        |                      |          |            |        |              |           |                | AAL94360.1  Ribonuclease G                                  |              |    |                |                         |             |   |   |
|                  |                        |                      |          |            | 5      |              | 6.8751    |                |                                                             |              |    |                |                         |             |   |   |
| FN0155           |                        |                      |          |            |        |              |           |                | AAL94361.1  Hypothetical protein                            |              |    |                |                         |             |   |   |
|                  |                        |                      |          |            | 13     |              | 13.9515   |                |                                                             |              |    |                |                         |             |   |   |
| FN0156           |                        |                      |          |            | 5      |              | 6.8751    |                |                                                             |              |    |                |                         |             |   |   |
|                  | 0.804                  | 7.654                | 4.903e-2 | 7.721e-2   | 17     | 4            | 18.2443   | 5.4806         | AAL94362.1  Phosphopantetheine adenylyltransferase          |              |    |                |                         |             |   |   |
| FN0158           |                        |                      |          |            | 14     | 16           | 19.2503   | 16.0000        |                                                             |              |    |                |                         |             |   |   |
|                  | -0.200                 | 8.476                | 1.591e-1 | 4.339e-1   | 20     | 12           | 21.4639   | 16.4417        | AAL94364.1  DNA-binding protein                             |              |    |                |                         |             |   |   |
| FN0164           |                        |                      |          |            | 10     | 24           | 13.7502   | 24.0000        |                                                             |              |    |                |                         |             |   |   |
|                  | -0.528                 | 14.561               | 2.508e-2 | 2.927e-2   | 117    | 155          | 125.5639  | 212.3717       | AAL94370.1  Anhydro-N-acetylmuramyl-tripeptide amidase      |              |    |                |                         |             |   |   |
| FN0170           |                        |                      |          |            | 97     | 161          | 133.3770  | 161.0000       |                                                             |              |    |                |                         |             |   |   |
|                  | 0.025                  | 13.867               | 2.779e-1 | 9.227e-1   | 117    | 63           | 125.5639  | 86.3188        | AAL94376.1  GTP-binding protein                             |              |    |                |                         |             |   |   |
| FN0173           |                        |                      |          |            | 88     | 156          | 121.0018  | 156.0000       |                                                             |              |    |                |                         |             |   |   |
|                  | 1.062                  | 11.089               | 4.654e-2 | 7.143e-2   | 68     | 7            | 72.9773   | 9.5910         | AAL94379.1  Hypothetical protein                            |              |    |                |                         |             |   |   |
| FN0174           |                        |                      |          |            | 45     | 55           | 61.8759   | 55.0000        |                                                             |              |    |                |                         |             |   |   |
|                  | 0.973                  | 13.558               | 1.273e-2 | 1.087e-2   | 165    | 56           | 177.0773  | 76.7278        | AAL94380.1  Enoyl-[acyl-carrier-protein] reductase          |              |    |                |                         |             |   |   |
| FN0175           |                        |                      |          |            | 95     | 80           | 130.6270  | 80.0000        |                                                             |              |    |                |                         |             |   |   |
|                  | -0.068                 | 7.905                |          |            |        | 10           |           | 13.7014        | AAL94381.1  Cell division inhibitor MinC                    |              |    |                |                         |             |   |   |
| FN0176           |                        |                      |          |            | 11     | 18           | 15.1252   | 18.0000        |                                                             |              |    |                |                         |             |   |   |
|                  | 0.063                  | 15.369               | 2.052e-1 | 6.188e-1   | 174    | 134          | 186.7361  | 183.5987       | AAL94382.1  Cell division inhibitor MinD                    |              |    |                |                         |             |   |   |
| FN0177           |                        |                      |          |            | 170    | 219          | 233.7535  | 219.0000       |                                                             |              |    |                |                         |             |   |   |
|                  | 1.712                  | 5.790                |          |            | 11     | 3            | 11.8052   | 4.1104         | AAL94383.1  Cell division inhibitor MinE                    |              |    |                |                         |             |   |   |
| FN0178           |                        |                      |          |            | 11     |              | 15.1252   |                |                                                             |              |    |                |                         |             |   |   |
|                  | 0.251                  | 10.999               | 7.306e-2 | 1.371e-1   | 42     | 35           | 45.0742   | 47.9549        | AAL94384.1  UNC-44 ankyrins                                 |              |    |                |                         |             |   |   |
|                  |                        |                      |          |            | 39     | 35           | 53.6258   | 35.0000        |                                                             |              |    |                |                         |             |   |   |

Show detected proteins only  
 Show all proteins  
 Filter by category:

Proteins found: 1305

Test Cutoff

| Signif | Direction | Applies To   |
|--------|-----------|--------------|
| yes    | +         | ratios, bars |
| no     | n/a       | bars         |
| yes    | -         | ratios, bars |
| yes    | +         | p-, q-Values |
| yes    | -         |              |

Fn Summary Table FnPg vs Fn FnSg vs Fn FnPgSg vs Fn FnPgSg vs FnPg FnSg vs FnPg FnPgSg vs FnSg Fn Coverage

| Protein | FnPgSg vs FnPg         |                      |          |          | Raw    |      | Normalized |           | Description                                                                 | Log <sub>2</sub> Ratios |    |    |   |   |   |   |
|---------|------------------------|----------------------|----------|----------|--------|------|------------|-----------|-----------------------------------------------------------------------------|-------------------------|----|----|---|---|---|---|
|         | Log <sub>2</sub> Ratio | Log <sub>2</sub> Sum | q-Value  | p-Value  | FnPgSg | FnPg | FnPgSg     | FnPg      |                                                                             | -6                      | -4 | -2 | 0 | 2 | 4 | 6 |
| FN0179  | -1.721                 | 10.821               | 8.15e-2  | 1.602e-1 | 27     | 93   | 28.9763    | 127.4230  | AAL94385.1  Ankyrin repeat proteins                                         |                         |    |    |   |   |   |   |
|         |                        |                      |          |          | 13     | 27   | 17.8753    | 27.0000   |                                                                             |                         |    |    |   |   |   |   |
| FN0180  |                        |                      |          |          | 8      |      | 8.5856     |           | AAL94386.1  Tetratricopeptide repeat family protein                         |                         |    |    |   |   |   |   |
|         |                        |                      |          |          |        |      |            |           |                                                                             |                         |    |    |   |   |   |   |
| FN0181  | -1.006                 | 8.713                | 8.424e-2 | 1.682e-1 | 9      | 11   | 9.6588     | 15.0715   | AAL94387.1  Hypothetical protein                                            |                         |    |    |   |   |   |   |
|         |                        |                      |          |          | 14     | 43   | 19.2503    | 43.0000   |                                                                             |                         |    |    |   |   |   |   |
| FN0182  | -1.761                 | 13.860               | 9.97e-2  | 2.183e-1 | 76     | 35   | 81.5629    | 47.9549   | AAL94388.1  Sarcosine oxidase alpha subunit                                 |                         |    |    |   |   |   |   |
|         |                        |                      |          |          | 37     | 401  | 50.8758    | 401.0000  |                                                                             |                         |    |    |   |   |   |   |
| FN0183  | -0.448                 | 14.734               | 1.98e-1  | 5.877e-1 | 152    | 34   | 163.1258   | 46.5848   | AAL94389.1  Glycerol-3-phosphate dehydrogenase                              |                         |    |    |   |   |   |   |
|         |                        |                      |          |          | 87     | 339  | 119.6268   | 339.0000  |                                                                             |                         |    |    |   |   |   |   |
| FN0185  | -0.513                 | 7.436                | 6.967e-3 | 4.177e-3 | 9      | 12   | 9.6588     | 16.4417   | AAL94391.1  Hypothetical protein                                            |                         |    |    |   |   |   |   |
|         |                        |                      |          |          | 9      | 15   | 12.3752    | 15.0000   |                                                                             |                         |    |    |   |   |   |   |
| FN0189  | -1.400                 | 7.244                |          |          | 9      |      | 9.6588     |           | AAL94395.1  Two-component response regulator yesN                           |                         |    |    |   |   |   |   |
|         |                        |                      |          |          | 4      | 20   | 5.5001     | 20.0000   |                                                                             |                         |    |    |   |   |   |   |
| FN0190  |                        |                      |          |          |        | 6    |            | 8.2208    | AAL94396.1  Two-component sensor kinase yesM                                |                         |    |    |   |   |   |   |
|         |                        |                      |          |          |        | 3    |            | 3.0000    |                                                                             |                         |    |    |   |   |   |   |
| FN0191  | -1.092                 | 8.263                | 2.389e-2 | 2.73e-2  | 7      | 14   | 7.5124     | 19.1820   | AAL94397.1  helix-turn-helix DNA-binding protein                            |                         |    |    |   |   |   |   |
|         |                        |                      |          |          | 12     | 32   | 16.5002    | 32.0000   |                                                                             |                         |    |    |   |   |   |   |
| FN0192  | 1.303                  | 9.303                |          |          | 39     |      | 41.8546    |           | AAL94398.1  Dipeptide-binding protein                                       |                         |    |    |   |   |   |   |
|         |                        |                      |          |          | 27     | 16   | 37.1256    | 16.0000   |                                                                             |                         |    |    |   |   |   |   |
| FN0198  |                        |                      |          |          | 5      |      | 5.3660     |           | AAL94404.1  Transcriptional regulatory protein                              |                         |    |    |   |   |   |   |
|         |                        |                      |          |          | 6      |      | 8.2501     |           |                                                                             |                         |    |    |   |   |   |   |
| FN0199  | -0.556                 | 11.146               | 2.543e-2 | 2.985e-2 | 45     | 39   | 48.2938    | 53.4355   | AAL94405.1  Hypothetical protein                                            |                         |    |    |   |   |   |   |
|         |                        |                      |          |          | 22     | 62   | 30.2505    | 62.0000   |                                                                             |                         |    |    |   |   |   |   |
| FN0200  | -0.244                 | 19.007               | 2.26e-1  | 6.999e-1 | 609    | 942  | 653.5762   | 1290.6717 | AAL94406.1  Biotin carboxyl carrier protein of glutaconyl-CoA decarboxylase |                         |    |    |   |   |   |   |
|         |                        |                      |          |          | 495    | 289  | 680.6353   | 289.0000  |                                                                             |                         |    |    |   |   |   |   |
| FN0202  | 0.637                  | 19.860               | 3.092e-2 | 3.975e-2 | 1335   | 585  | 1432.7163  | 801.5318  | AAL94408.1  Glutaconate CoA-transferase subunit A                           |                         |    |    |   |   |   |   |
|         |                        |                      |          |          | 727    | 763  | 999.6401   | 763.0000  |                                                                             |                         |    |    |   |   |   |   |
| FN0203  | -0.654                 | 20.575               | 3.03e-2  | 3.86e-2  | 833    | 1361 | 893.9721   | 1864.7603 | AAL94409.1  Glutaconate CoA-transferase subunit B                           |                         |    |    |   |   |   |   |
|         |                        |                      |          |          | 799    | 1270 | 1098.6416  | 1270.0000 |                                                                             |                         |    |    |   |   |   |   |
| FN0204  | 0.282                  | 21.116               | 5.991e-2 | 1.045e-1 | 1462   | 833  | 1569.0122  | 1141.3265 | AAL94410.1  Glutaconyl-CoA decarboxylase A subunit                          |                         |    |    |   |   |   |   |
|         |                        |                      |          |          | 1277   | 1593 | 1755.9015  | 1593.0000 |                                                                             |                         |    |    |   |   |   |   |

Show detected proteins only  
 Show all proteins  
 Filter by category:

Proteins found: 1305

Test Cutoff

| Signif      | Direction | Applies To |
|-------------|-----------|------------|
| red         | yes       | +          |
| yellow      | no        | n/a        |
| green       | yes       | -          |
| pink        | yes       | +          |
| light green | yes       | -          |

Applies To: ratios, bars; ratios, bars; ratios, bars; p-, q-Values

Fn Summary Table FnPg vs Fn FnSg vs Fn FnPgSg vs Fn FnPgSg vs FnPg FnSg vs FnPg FnPgSg vs FnSg Fn Coverage

| Protein | FnPgSg vs FnPg         |                      |          |          | Raw    |      | Normalized |          | Description                                                     | Log <sub>2</sub> Ratios |    |    |   |   |   |   |
|---------|------------------------|----------------------|----------|----------|--------|------|------------|----------|-----------------------------------------------------------------|-------------------------|----|----|---|---|---|---|
|         | Log <sub>2</sub> Ratio | Log <sub>2</sub> Sum | q-Value  | p-Value  | FnPgSg | FnPg | FnPgSg     | FnPg     |                                                                 | -6                      | -4 | -2 | 0 | 2 | 4 | 6 |
| FN0206  | -0.550                 | 11.572               | 1.166e-1 | 2.787e-1 | 44     | 69   | 47.2206    | 94.5396  | AAL94412.1  Activator of (R)-2-hydroxyglutaryl-CoA dehydratase  |                         |    |    |   |   |   |   |
|         |                        |                      |          |          | 32     | 39   | 44.0007    | 39.0000  |                                                                 |                         |    |    |   |   |   |   |
| FN0207  | -0.011                 | 18.701               | 2.878e-1 | 9.689e-1 | 620    | 632  | 665.3814   | 865.9284 | AAL94413.1  (R)-2-hydroxyglutaryl-CoA dehydratase alpha-subunit |                         |    |    |   |   |   |   |
|         |                        |                      |          |          | 462    | 445  | 635.2596   | 445.0000 |                                                                 |                         |    |    |   |   |   |   |
| FN0208  | 0.222                  | 17.601               | 1.793e-2 | 1.826e-2 | 435    | 280  | 466.8402   | 383.6392 | AAL94414.1  (R)-2-hydroxyglutaryl-CoA dehydratase beta-subunit  |                         |    |    |   |   |   |   |
|         |                        |                      |          |          | 361    | 442  | 496.3825   | 442.0000 |                                                                 |                         |    |    |   |   |   |   |
| FN0209  | -0.069                 | 17.531               | 8.653e-2 | 1.75e-1  | 383    | 339  | 411.0340   | 464.4774 | AAL94415.1  Hypothetical cytosolic protein                      |                         |    |    |   |   |   |   |
|         |                        |                      |          |          | 319    | 427  | 438.6316   | 427.0000 |                                                                 |                         |    |    |   |   |   |   |
| FN0212  | -0.584                 | 8.556                | 8.801e-2 | 1.795e-1 | 18     | 23   | 19.3175    | 31.5132  | AAL94418.1  Hypothetical protein                                |                         |    |    |   |   |   |   |
|         |                        |                      |          |          | 9      | 16   | 12.3752    | 16.0000  |                                                                 |                         |    |    |   |   |   |   |
| FN0214  |                        |                      |          |          |        |      |            | 4.1104   | AAL94420.1  Crossover junction endodeoxyribonuclease ruvC       |                         |    |    |   |   |   |   |
|         |                        |                      |          |          |        |      |            |          |                                                                 |                         |    |    |   |   |   |   |
| FN0218  | -1.665                 | 13.460               | 1.814e-2 | 1.856e-2 | 56     | 173  | 60.0990    | 237.0342 | AAL94424.1  Anthranilate synthase component II                  |                         |    |    |   |   |   |   |
|         |                        |                      |          |          | 43     | 141  | 59.1259    | 141.0000 |                                                                 |                         |    |    |   |   |   |   |
| FN0219  | 0.682                  | 5.852                |          |          |        |      |            |          | AAL94425.1  Autolysin response regulator                        |                         |    |    |   |   |   |   |
|         |                        |                      |          |          | 7      | 6    | 9.6251     | 6.0000   |                                                                 |                         |    |    |   |   |   |   |
| FN0221  | 0.463                  | 12.145               | 4.803e-2 | 7.484e-2 | 87     | 45   | 93.3680    | 61.6563  | AAL94427.1  Carbon starvation protein A                         |                         |    |    |   |   |   |   |
|         |                        |                      |          |          | 47     | 53   | 64.6260    | 53.0000  |                                                                 |                         |    |    |   |   |   |   |
| FN0224  | 0.274                  | 8.356                | 1.616e-1 | 4.431e-1 | 23     | 16   | 24.6835    | 21.9222  | AAL94430.1  Excinuclease ABC subunit B                          |                         |    |    |   |   |   |   |
|         |                        |                      |          |          | 11     | 11   | 15.1252    | 11.0000  |                                                                 |                         |    |    |   |   |   |   |
| FN0225  |                        |                      |          |          |        |      |            |          | AAL94431.1  Gluconate permease                                  |                         |    |    |   |   |   |   |
|         |                        |                      |          |          |        | 4    |            | 4.0000   |                                                                 |                         |    |    |   |   |   |   |
| FN0226  | -0.183                 | 11.711               | 1.556e-2 | 1.502e-2 | 50     | 47   | 53.6598    | 64.3966  | AAL94432.1  Pyridoxal phosphate biosynthetic protein pdxA       |                         |    |    |   |   |   |   |
|         |                        |                      |          |          | 40     | 59   | 55.0008    | 59.0000  |                                                                 |                         |    |    |   |   |   |   |
| FN0227  |                        |                      |          |          |        |      |            |          | AAL94433.1  Hypothetical protein                                |                         |    |    |   |   |   |   |
|         |                        |                      |          |          |        | 4    |            | 4.0000   |                                                                 |                         |    |    |   |   |   |   |
| FN0233  | -0.266                 | 12.035               | 1.317e-1 | 3.341e-1 | 55     | 65   | 59.0258    | 89.0591  | AAL94439.1  Hypothetical protein                                |                         |    |    |   |   |   |   |
|         |                        |                      |          |          | 43     | 53   | 59.1259    | 53.0000  |                                                                 |                         |    |    |   |   |   |   |
| FN0234  |                        |                      |          |          |        |      |            |          | AAL94440.1  unknown                                             |                         |    |    |   |   |   |   |
|         |                        |                      |          |          |        | 11   |            | 11.0000  |                                                                 |                         |    |    |   |   |   |   |
| FN0235  |                        |                      |          |          |        |      |            |          | AAL94441.1  ABC transporter ATP-binding protein                 |                         |    |    |   |   |   |   |
|         |                        |                      |          |          |        | 16   |            | 21.9222  |                                                                 |                         |    |    |   |   |   |   |

Show detected proteins only  
 Show all proteins  
 Filter by category:

Proteins found: 1305

Enter (or paste) list of ORFs

Find ORFs

Test Cutoff

q-Value p-Value

.005

| Signif | Direction | Applies To   |
|--------|-----------|--------------|
| yes    | +         | ratios, bars |
| no     | n/a       | bars         |
| yes    | -         | ratios, bars |
| yes    | +         | p-, q-Values |
| yes    | -         | p-, q-Values |

Dot Plots Dot Plots



Fn Summary Table FnPg vs Fn FnSg vs Fn FnPgSg vs Fn FnPgSg vs FnPg FnSg vs FnPg FnPgSg vs FnSg Fn Coverage

| Protein | FnPgSg vs FnPg         |                      |          |          | Raw    |      | Normalized |           | Description                                           | Log <sub>2</sub> Ratios |    |    |   |   |   |   |
|---------|------------------------|----------------------|----------|----------|--------|------|------------|-----------|-------------------------------------------------------|-------------------------|----|----|---|---|---|---|
|         | Log <sub>2</sub> Ratio | Log <sub>2</sub> Sum | q-Value  | p-Value  | FnPgSg | FnPg | FnPgSg     | FnPg      |                                                       | -6                      | -4 | -2 | 0 | 2 | 4 | 6 |
| FN0236  | -1.091                 | 16.017               | 1.278e-1 | 3.191e-1 | 152    | 486  | 163.1258   | 665.8880  | AAL94442.1  ABC transporter substrate-binding protein |                         |    |    |   |   |   |   |
|         |                        |                      |          |          | 138    | 86   | 189.7529   | 86.0000   |                                                       |                         |    |    |   |   |   |   |
| FN0237  |                        |                      |          |          |        | 3    |            | 4.1104    | AAL94443.1  ABC transporter permease protein          |                         |    |    |   |   |   |   |
|         |                        |                      |          |          |        |      |            |           |                                                       |                         |    |    |   |   |   |   |
| FN0238  | -0.410                 | 10.436               | 1.077e-1 | 2.483e-1 | 23     | 40   | 24.6835    | 54.8056   | AAL94444.1  Hypothetical protein                      |                         |    |    |   |   |   |   |
|         |                        |                      |          |          | 29     | 31   | 39.8756    | 31.0000   |                                                       |                         |    |    |   |   |   |   |
| FN0240  | -0.077                 | 12.981               | 1.268e-1 | 3.154e-1 | 76     | 64   | 81.5629    | 87.6890   | AAL94446.1  Thymidylate synthase                      |                         |    |    |   |   |   |   |
|         |                        |                      |          |          | 68     | 97   | 93.5014    | 97.0000   |                                                       |                         |    |    |   |   |   |   |
| FN0241  | -1.464                 | 8.002                | 2.475e-2 | 2.871e-2 | 9      | 14   | 9.6588     | 19.1820   | AAL94447.1  Dihydrofolate reductase                   |                         |    |    |   |   |   |   |
|         |                        |                      |          |          | 7      | 34   | 9.6251     | 34.0000   |                                                       |                         |    |    |   |   |   |   |
| FN0242  | -1.737                 | 10.263               |          |          | 14     |      | 15.0247    |           | AAL94448.1  Trk system potassium uptake protein trkA  |                         |    |    |   |   |   |   |
|         |                        |                      |          |          | 17     | 64   | 23.3754    | 64.0000   |                                                       |                         |    |    |   |   |   |   |
| FN0243  | -2.241                 | 7.160                |          |          |        |      |            |           | AAL94449.1  Poly(A) polymerase                        |                         |    |    |   |   |   |   |
|         |                        |                      |          |          | 4      | 26   | 5.5001     | 26.0000   |                                                       |                         |    |    |   |   |   |   |
| FN0244  |                        |                      |          |          |        |      |            |           | AAL94450.1  COP associated protein                    |                         |    |    |   |   |   |   |
|         |                        |                      |          |          |        | 10   |            | 10.0000   |                                                       |                         |    |    |   |   |   |   |
| FN0245  | -0.313                 | 5.687                |          |          | 6      |      | 6.4392     |           | AAL94451.1  Copper-exporting ATPase                   |                         |    |    |   |   |   |   |
|         |                        |                      |          |          |        | 8    |            | 8.0000    |                                                       |                         |    |    |   |   |   |   |
| FN0247  | 0.982                  | 14.343               | 2.788e-2 | 3.415e-2 | 229    | 41   | 245.7618   | 56.1757   | AAL94453.1  Hypothetical cytosolic protein            |                         |    |    |   |   |   |   |
|         |                        |                      |          |          | 116    | 149  | 159.5024   | 149.0000  |                                                       |                         |    |    |   |   |   |   |
| FN0248  | -2.120                 | 8.664                |          |          | 9      |      | 9.6588     |           | AAL94454.1  Hypothetical Exported Protein             |                         |    |    |   |   |   |   |
|         |                        |                      |          |          |        | 42   |            | 42.0000   |                                                       |                         |    |    |   |   |   |   |
| FN0249  | 0.814                  | 13.456               | 5.184e-2 | 8.412e-2 | 121    | 89   | 129.8567   | 121.9424  | AAL94455.1  unknown                                   |                         |    |    |   |   |   |   |
|         |                        |                      |          |          | 110    | 38   | 151.2523   | 38.0000   |                                                       |                         |    |    |   |   |   |   |
| FN0250  | 0.652                  | 13.840               | 7.563e-2 | 1.439e-1 | 142    | 106  | 152.3938   | 145.2348  | AAL94456.1  unknown                                   |                         |    |    |   |   |   |   |
|         |                        |                      |          |          | 110    | 48   | 151.2523   | 48.0000   |                                                       |                         |    |    |   |   |   |   |
| FN0251  | 0.257                  | 15.544               | 2.138e-1 | 6.518e-1 | 175    | 240  | 187.8093   | 328.8336  | AAL94457.1  Hypothetical membrane-spanning Protein    |                         |    |    |   |   |   |   |
|         |                        |                      |          |          | 211    | 71   | 290.1294   | 71.0000   |                                                       |                         |    |    |   |   |   |   |
| FN0252  | -1.438                 | 17.551               | 5.197e-2 | 8.444e-2 | 231    | 753  | 247.9082   | 1031.7153 | AAL94458.1  unknown                                   |                         |    |    |   |   |   |   |
|         |                        |                      |          |          | 207    | 411  | 284.6293   | 411.0000  |                                                       |                         |    |    |   |   |   |   |
| FN0253  | 0.488                  | 15.687               |          |          | 234    |      | 251.1278   |           | AAL94459.1  Outer membrane protein                    |                         |    |    |   |   |   |   |
|         |                        |                      |          |          | 213    | 194  | 292.8794   | 194.0000  |                                                       |                         |    |    |   |   |   |   |

Show detected proteins only  
 Show all proteins  
 Filter by category:

Proteins found:  
1305

Enter (or paste) list of ORFs

Find ORFs

Test Cutoff

q-Value

p-Value

.005

| Signif | Direction | Applies To   |
|--------|-----------|--------------|
| yes    | +         | ratios, bars |
| no     | n/a       | bars         |
| yes    | -         | ratios, bars |
| yes    | +         | p-, q-Values |
| yes    | -         | p-, q-Values |

Dot Plots

Fn Summary Table FnPg vs Fn FnSg vs Fn FnPgSg vs Fn FnPgSg vs FnPg FnSg vs FnPg FnPgSg vs FnSg Fn Coverage

| Protein | FnPgSg vs FnPg         |                      |          |          | Raw    |      | Normalized |           | Description                                                       | Log <sub>2</sub> Ratios |    |    |   |   |   |   |
|---------|------------------------|----------------------|----------|----------|--------|------|------------|-----------|-------------------------------------------------------------------|-------------------------|----|----|---|---|---|---|
|         | Log <sub>2</sub> Ratio | Log <sub>2</sub> Sum | q-Value  | p-Value  | FnPgSg | FnPg | FnPgSg     | FnPg      |                                                                   | -6                      | -4 | -2 | 0 | 2 | 4 | 6 |
| FN0254  | -0.256                 | 18.094               | 1.078e-1 | 2.488e-1 | 373    | 352  | 400.3020   | 482.2892  | AAL94460.1  Fusobacterium outer membrane protein family           |                         |    |    |   |   |   |   |
|         |                        |                      |          |          | 413    | 674  | 567.8836   | 674.0000  |                                                                   |                         |    |    |   |   |   |   |
| FN0258  | -0.370                 | 5.289                |          |          |        | 6    |            | 8.2208    | AAL94464.1  Zinc-transporting ATPase                              |                         |    |    |   |   |   |   |
|         |                        |                      |          |          | 4      | 6    | 5.5001     | 6.0000    |                                                                   |                         |    |    |   |   |   |   |
| FN0259  |                        |                      |          |          | 11     |      |            | 11.8052   | AAL94465.1  Zinc-transporting ATPase                              |                         |    |    |   |   |   |   |
|         |                        |                      |          |          | 12     |      |            | 16.5002   |                                                                   |                         |    |    |   |   |   |   |
| FN0261  | -0.304                 | 7.774                |          |          | 12     | 12   | 12.8783    | 16.4417   | AAL94467.1  Pyruvate formate-lyase activating enzyme              |                         |    |    |   |   |   |   |
|         |                        |                      |          |          | 10     |      |            | 13.7502   |                                                                   |                         |    |    |   |   |   |   |
| FN0262  | 1.627                  | 22.818               | 9.508e-3 | 6.973e-3 | 4443   | 1745 | 4768.2087  | 2390.8940 | AAL94468.1  Formate acetyltransferase                             |                         |    |    |   |   |   |   |
|         |                        |                      |          |          | 3482   | 704  | 4787.8222  | 704.0000  |                                                                   |                         |    |    |   |   |   |   |
| FN0263  | -0.896                 | 15.729               | 1.265e-1 | 3.142e-1 | 180    | 386  | 193.1752   | 528.8740  | AAL94469.1  Peptidyl-prolyl cis-trans isomerase                   |                         |    |    |   |   |   |   |
|         |                        |                      |          |          | 108    | 107  | 148.5022   | 107.0000  |                                                                   |                         |    |    |   |   |   |   |
| FN0264  | 0.647                  | 15.932               | 4.078e-2 | 5.91e-2  | 273    | 96   | 292.9824   | 131.5334  | AAL94470.1  Hypothetical protein                                  |                         |    |    |   |   |   |   |
|         |                        |                      |          |          | 242    | 268  | 332.7550   | 268.0000  |                                                                   |                         |    |    |   |   |   |   |
| FN0265  | -0.773                 | 6.146                |          |          | 6      |      | 6.4392     |           | AAL94471.1  Cell division protein ftsX                            |                         |    |    |   |   |   |   |
|         |                        |                      |          |          |        |      |            | 11.0000   |                                                                   |                         |    |    |   |   |   |   |
| FN0266  | -0.956                 | 5.044                |          |          |        |      |            |           | AAL94472.1  membrane protein related to metalloendopeptidase      |                         |    |    |   |   |   |   |
|         |                        |                      |          |          | 3      | 8    | 4.1251     | 8.0000    |                                                                   |                         |    |    |   |   |   |   |
| FN0267  |                        |                      |          |          |        |      |            |           | AAL94473.1  ATP-NAD kinase                                        |                         |    |    |   |   |   |   |
|         |                        |                      |          |          |        |      |            | 6.0000    |                                                                   |                         |    |    |   |   |   |   |
| FN0268  | -1.869                 | 5.958                |          |          |        |      |            | 15.0715   | AAL94474.1  DNA repair protein recN                               |                         |    |    |   |   |   |   |
|         |                        |                      |          |          | 3      |      | 4.1251     |           |                                                                   |                         |    |    |   |   |   |   |
| FN0270  |                        |                      |          |          | 4      |      | 4.2928     |           | AAL94476.1  GTP-binding protein era                               |                         |    |    |   |   |   |   |
|         |                        |                      |          |          | 4      |      | 5.5001     |           |                                                                   |                         |    |    |   |   |   |   |
| FN0271  | -1.705                 | 5.909                |          |          | 4      |      | 4.2928     |           | AAL94477.1  Enoyl-CoA hydratase                                   |                         |    |    |   |   |   |   |
|         |                        |                      |          |          |        | 14   |            | 14.0000   |                                                                   |                         |    |    |   |   |   |   |
| FN0272  |                        |                      |          |          |        |      |            | 4.0000    | AAL94478.1  Acetoacetate: butyrate/acetate coenzyme A transferase |                         |    |    |   |   |   |   |
|         |                        |                      |          |          |        | 4    |            |           |                                                                   |                         |    |    |   |   |   |   |
| FN0273  |                        |                      |          |          |        |      |            | 16.0000   | AAL94479.1  Butyrate-acetoacetate CoA-transferase subunit B       |                         |    |    |   |   |   |   |
|         |                        |                      |          |          |        | 16   |            |           |                                                                   |                         |    |    |   |   |   |   |
| FN0276  | -3.068                 | 7.272                |          |          | 4      |      | 4.2928     |           | AAL94482.1  Sodium-dependent phosphate transporter                |                         |    |    |   |   |   |   |
|         |                        |                      |          |          |        | 36   |            | 36.0000   |                                                                   |                         |    |    |   |   |   |   |

Show detected proteins only  
 Show all proteins  
 Filter by category:

Proteins found: 1305

Test Cutoff

| Signif      | Direction | Applies To |
|-------------|-----------|------------|
| red         | yes       | +          |
| yellow      | no        | n/a        |
| green       | yes       | -          |
| pink        | yes       | +          |
| light green | yes       | -          |

ratios, bars  
bars  
ratios, bars  
p-, q-Values

Fn Summary Table FnPg vs Fn FnSg vs Fn FnPgSg vs Fn FnPgSg vs FnPg FnSg vs FnPg FnPgSg vs FnSg Fn Coverage

| Protein | FnPgSg vs FnPg         |                      |          |          | Raw    |      | Normalized |          | Description                                                | Log <sub>2</sub> Ratios |    |    |   |   |   |   |
|---------|------------------------|----------------------|----------|----------|--------|------|------------|----------|------------------------------------------------------------|-------------------------|----|----|---|---|---|---|
|         | Log <sub>2</sub> Ratio | Log <sub>2</sub> Sum | q-Value  | p-Value  | FnPgSg | FnPg | FnPgSg     | FnPg     |                                                            | -6                      | -4 | -2 | 0 | 2 | 4 | 6 |
| FN0277  | -0.275                 | 6.814                | 1.447e-2 | 1.332e-2 | 9      | 9    | 9.6588     | 12.3313  | AAL94483.1  Hypothetical protein                           |                         |    |    |   |   |   |   |
|         |                        |                      |          |          | 7      | 11   | 9.6251     | 11.0000  |                                                            |                         |    |    |   |   |   |   |
| FN0278  | 0.373                  | 16.480               | 3.447e-2 | 4.684e-2 | 362    | 209  | 388.4969   | 286.3592 | AAL94484.1  Xaa-His dipeptidase                            |                         |    |    |   |   |   |   |
|         |                        |                      |          |          | 218    | 245  | 299.7545   | 245.0000 |                                                            |                         |    |    |   |   |   |   |
| FN0279  | -1.504                 | 12.570               | 1.006e-1 | 2.215e-1 | 44     | 26   | 47.2206    | 35.6236  | AAL94485.1  Lipoprotein                                    |                         |    |    |   |   |   |   |
|         |                        |                      |          |          | 33     | 227  | 45.3757    | 227.0000 |                                                            |                         |    |    |   |   |   |   |
| FN0280  | 0.183                  | 12.558               | 2.323e-1 | 7.252e-1 | 76     | 21   | 81.5629    | 28.7729  | AAL94486.1  Hypothetical protein                           |                         |    |    |   |   |   |   |
|         |                        |                      |          |          | 61     | 117  | 83.8763    | 117.0000 |                                                            |                         |    |    |   |   |   |   |
| FN0281  | -1.437                 | 9.985                | 5.448e-2 | 9.099e-2 | 13     | 21   | 13.9515    | 28.7729  | AAL94487.1  DNA polymerase III alpha subunit               |                         |    |    |   |   |   |   |
|         |                        |                      |          |          | 18     | 76   | 24.7504    | 76.0000  |                                                            |                         |    |    |   |   |   |   |
| FN0282  | -0.148                 | 10.803               | 1.813e-1 | 5.182e-1 | 30     | 27   | 32.1959    | 36.9938  | AAL94488.1  Hypothetical protein                           |                         |    |    |   |   |   |   |
|         |                        |                      |          |          | 35     | 52   | 48.1257    | 52.0000  |                                                            |                         |    |    |   |   |   |   |
| FN0283  | -0.541                 | 6.103                |          |          |        |      |            |          | AAL94489.1  tRNA (Guanine-N1) - methyltransferase          |                         |    |    |   |   |   |   |
|         |                        |                      |          |          | 5      | 10   | 6.8751     | 10.0000  |                                                            |                         |    |    |   |   |   |   |
| FN0284  | -1.455                 | 9.946                |          |          | 11     |      | 11.8052    |          | AAL94490.1  16S rRNA processing protein rimM               |                         |    |    |   |   |   |   |
|         |                        |                      |          |          | 19     | 52   | 26.1254    | 52.0000  |                                                            |                         |    |    |   |   |   |   |
| FN0285  | -0.531                 | 8.978                |          |          | 22     |      | 23.6103    |          | AAL94491.1  RNA binding protein                            |                         |    |    |   |   |   |   |
|         |                        |                      |          |          | 10     | 27   | 13.7502    | 27.0000  |                                                            |                         |    |    |   |   |   |   |
| FN0287  | -0.722                 | 6.679                |          |          | 7      |      | 7.5124     |          | AAL94493.1  Dimethyladenosine transferase                  |                         |    |    |   |   |   |   |
|         |                        |                      |          |          | 6      | 13   | 8.2501     | 13.0000  |                                                            |                         |    |    |   |   |   |   |
| FN0288  | -0.468                 | 11.210               | 1.418e-1 | 3.721e-1 | 31     | 23   | 33.2691    | 31.5132  | AAL94494.1  Hypoxanthine-guanine phosphoribosyltransferase |                         |    |    |   |   |   |   |
|         |                        |                      |          |          | 36     | 83   | 49.5007    | 83.0000  |                                                            |                         |    |    |   |   |   |   |
| FN0290  |                        |                      |          |          |        |      |            |          | AAL94496.1  Hemolysin                                      |                         |    |    |   |   |   |   |
|         |                        |                      |          |          | 3      |      | 4.1251     |          |                                                            |                         |    |    |   |   |   |   |
| FN0291  | -1.075                 | 5.568                |          |          | 5      |      | 5.3660     |          | AAL94497.1  Hemolysin                                      |                         |    |    |   |   |   |   |
|         |                        |                      |          |          | 3      | 10   | 4.1251     | 10.0000  |                                                            |                         |    |    |   |   |   |   |
| FN0294  | 0.403                  | 14.893               | 5.492e-2 | 9.217e-2 | 188    | 136  | 201.7608   | 186.3390 | AAL94500.1  Transketolase subunit A                        |                         |    |    |   |   |   |   |
|         |                        |                      |          |          | 145    | 117  | 199.3780   | 117.0000 |                                                            |                         |    |    |   |   |   |   |
| FN0295  | -0.510                 | 14.457               | 8.978e-2 | 1.851e-1 | 106    | 170  | 113.7587   | 232.9238 | AAL94501.1  Transketolase                                  |                         |    |    |   |   |   |   |
|         |                        |                      |          |          | 100    | 125  | 137.5021   | 125.0000 |                                                            |                         |    |    |   |   |   |   |
| FN0296  | 0.363                  | 11.980               | 8.364e-2 | 1.664e-1 | 60     | 30   | 64.3917    | 41.1042  | AAL94502.1  Hypothetical cytosolic protein                 |                         |    |    |   |   |   |   |
|         |                        |                      |          |          | 58     | 71   | 79.7512    | 71.0000  |                                                            |                         |    |    |   |   |   |   |

Show detected proteins only  
 Show all proteins  
 Filter by category:

Proteins found: 1305

Test Cutoff

| Signif | Direction | Applies To   |
|--------|-----------|--------------|
| yes    | +         | ratios, bars |
| no     | n/a       | bars         |
| yes    | -         | ratios, bars |
| yes    | +         | p-, q-Values |
| yes    | -         | p-, q-Values |

Fn Summary Table FnPg vs Fn FnSg vs Fn FnPgSg vs Fn FnPgSg vs FnPg FnSg vs FnPg FnPgSg vs FnSg Fn Coverage

| Protein | FnPgSg vs FnPg         |                      |          |          | Raw    |      |          |          | Normalized |      |        |        | Description                                                            | Log <sub>2</sub> Ratios |    |    |   |   |   |   |
|---------|------------------------|----------------------|----------|----------|--------|------|----------|----------|------------|------|--------|--------|------------------------------------------------------------------------|-------------------------|----|----|---|---|---|---|
|         | Log <sub>2</sub> Ratio | Log <sub>2</sub> Sum | q-Value  | p-Value  | FnPgSg | FnPg | FnPgSg   | FnPg     | FnPgSg     | FnPg | FnPgSg | FnPg   |                                                                        | -6                      | -4 | -2 | 0 | 2 | 4 | 6 |
| FN0297  | -0.755                 | 6.844                |          |          |        | 5    |          | 6.8507   |            |      |        | 6.8507 | AAL94503.1  ATPase associated with chromosome architecture/replication |                         |    |    |   |   |   |   |
|         |                        |                      |          |          |        | 6    | 21       | 8.2501   | 21.0000    |      |        |        | AAL94504.1  Histidyl-tRNA synthetase                                   |                         |    |    |   |   |   |   |
| FN0298  | -0.434                 | 15.615               | 1.604e-1 | 4.385e-1 | 181    | 94   | 194.2484 | 128.7931 |            |      |        |        | AAL94505.1  Aspartyl-tRNA synthetase                                   |                         |    |    |   |   |   |   |
|         |                        |                      |          |          |        | 139  | 392      | 191.1279 | 392.0000   |      |        |        | AAL94511.1  Iron(III) dicitrate-binding protein                        |                         |    |    |   |   |   |   |
| FN0299  | 0.439                  | 15.864               | 9.365e-2 | 1.976e-1 | 262    | 96   | 281.1773 | 131.5334 |            |      |        |        | AAL94513.1  Iron(III) dicitrate transport ATP-binding protein fecE     |                         |    |    |   |   |   |   |
|         |                        |                      |          |          |        | 209  | 288      | 287.3793 | 288.0000   |      |        |        | AAL94514.1  Iron(III)-binding protein                                  |                         |    |    |   |   |   |   |
| FN0305  |                        |                      |          |          | 3      |      | 3.2196   |          |            |      |        |        | AAL94515.1  Iron(III)-transport system permease protein sfuB           |                         |    |    |   |   |   |   |
|         |                        |                      |          |          | 3      |      | 4.1251   |          |            |      |        |        | AAL94516.1  Iron(III)-transport ATP-binding protein sfuC               |                         |    |    |   |   |   |   |
| FN0307  |                        |                      |          |          |        |      |          |          |            |      |        |        | AAL94517.1  Anaerobic ribonucleoside-triphosphate reductase            |                         |    |    |   |   |   |   |
|         |                        |                      |          |          |        | 3    |          | 4.1251   |            |      |        |        | AAL94519.1  16S rRNA m(5)C 967 methyltransferase                       |                         |    |    |   |   |   |   |
| FN0308  | 0.174                  | 16.482               | 1.426e-1 | 3.748e-1 | 354    | 191  | 379.9113 | 261.6967 |            |      |        |        | AAL94520.1  Caffeoyl-CoA O-methyltransferase                           |                         |    |    |   |   |   |   |
|         |                        |                      |          |          |        | 191  | 308      | 262.6290 | 308.0000   |      |        |        | AAL94521.1  Transcriptional regulator, AraC family                     |                         |    |    |   |   |   |   |
| FN0309  |                        |                      |          |          | 5      |      | 5.3660   |          |            |      |        |        | AAL94522.1  Hypothetical protein                                       |                         |    |    |   |   |   |   |
|         |                        |                      |          |          | 8      |      | 11.0002  |          |            |      |        |        | AAL94523.1  Tryptophan synthase beta chain                             |                         |    |    |   |   |   |   |
| FN0310  | 0.287                  | 13.118               | 1.467e-1 | 3.896e-1 | 116    | 83   | 124.4907 | 113.7216 |            |      |        |        | AAL94525.1  Citrate (pro-3S)-lyase ligase                              |                         |    |    |   |   |   |   |
|         |                        |                      |          |          |        | 61   | 57       | 83.8763  | 57.0000    |      |        |        | AAL94526.1  Hypothetical cytosolic protein                             |                         |    |    |   |   |   |   |
| FN0311  | 0.706                  | 12.789               | 4.3e-2   | 6.368e-2 | 90     | 29   | 96.5876  | 39.7341  |            |      |        |        | AAL94526.1  Hypothetical cytosolic protein                             |                         |    |    |   |   |   |   |
|         |                        |                      |          |          |        | 86   | 92       | 118.2518 | 92.0000    |      |        |        | AAL94526.1  Hypothetical cytosolic protein                             |                         |    |    |   |   |   |   |
| FN0313  | -1.384                 | 6.231                |          |          | 5      |      | 5.3660   |          |            |      |        |        | AAL94526.1  Hypothetical cytosolic protein                             |                         |    |    |   |   |   |   |
|         |                        |                      |          |          |        |      | 14       |          | 14.0000    |      |        |        | AAL94526.1  Hypothetical cytosolic protein                             |                         |    |    |   |   |   |   |
| FN0314  |                        |                      |          |          |        |      |          |          |            |      |        |        | AAL94526.1  Hypothetical cytosolic protein                             |                         |    |    |   |   |   |   |
|         |                        |                      |          |          |        |      | 8        |          | 8.0000     |      |        |        | AAL94526.1  Hypothetical cytosolic protein                             |                         |    |    |   |   |   |   |
| FN0315  |                        |                      |          |          |        |      |          |          |            |      |        |        | AAL94526.1  Hypothetical cytosolic protein                             |                         |    |    |   |   |   |   |
|         |                        |                      |          |          |        |      | 10       |          | 10.0000    |      |        |        | AAL94526.1  Hypothetical cytosolic protein                             |                         |    |    |   |   |   |   |
| FN0316  | 0.361                  | 9.445                |          |          | 25     | 17   | 26.8299  | 23.2924  |            |      |        |        | AAL94526.1  Hypothetical cytosolic protein                             |                         |    |    |   |   |   |   |
|         |                        |                      |          |          |        | 24   |          | 33.0005  |            |      |        |        | AAL94526.1  Hypothetical cytosolic protein                             |                         |    |    |   |   |   |   |
| FN0317  | -1.298                 | 7.167                | 6.799e-2 | 1.241e-1 | 4      | 7    | 4.2928   | 9.5910   |            |      |        |        | AAL94526.1  Hypothetical cytosolic protein                             |                         |    |    |   |   |   |   |
|         |                        |                      |          |          |        | 8    | 28       | 11.0002  | 28.0000    |      |        |        | AAL94526.1  Hypothetical cytosolic protein                             |                         |    |    |   |   |   |   |
| FN0319  | -0.348                 | 5.267                |          |          |        |      |          |          |            |      |        |        | AAL94526.1  Hypothetical cytosolic protein                             |                         |    |    |   |   |   |   |
|         |                        |                      |          |          |        | 4    | 7        | 5.5001   | 7.0000     |      |        |        | AAL94526.1  Hypothetical cytosolic protein                             |                         |    |    |   |   |   |   |
| FN0320  | 0.573                  | 9.914                | 9.886e-3 | 7.411e-3 | 36     | 16   | 38.6350  | 21.9222  |            |      |        |        | AAL94526.1  Hypothetical cytosolic protein                             |                         |    |    |   |   |   |   |
|         |                        |                      |          |          |        | 27   | 29       | 37.1256  | 29.0000    |      |        |        | AAL94526.1  Hypothetical cytosolic protein                             |                         |    |    |   |   |   |   |

Show detected proteins only  
 Show all proteins  
 Filter by category:

Proteins found: 1305

Enter (or paste) list of ORFs

Find ORFs

Test Cutoff

q-Value

p-Value

.005

| Signif | Direction | Applies To   |
|--------|-----------|--------------|
| yes    | +         | ratios, bars |
| no     | n/a       | bars         |
| yes    | -         | ratios, bars |
| yes    | +         | p-, q-Values |
| yes    | -         | p-, q-Values |

Dot Plots Dot Plots

Fn Summary Table FnPg vs Fn FnSg vs Fn FnPgSg vs Fn FnPgSg vs FnPg FnSg vs FnPg FnPgSg vs FnSg Fn Coverage

| Protein | FnPgSg vs FnPg         |                      |          |          | Raw    |      |           |           | Normalized                                                           |      |        |      | Description | Log <sub>2</sub> Ratios |    |    |   |   |   |   |  |
|---------|------------------------|----------------------|----------|----------|--------|------|-----------|-----------|----------------------------------------------------------------------|------|--------|------|-------------|-------------------------|----|----|---|---|---|---|--|
|         | Log <sub>2</sub> Ratio | Log <sub>2</sub> Sum | q-Value  | p-Value  | FnPgSg | FnPg | FnPgSg    | FnPg      | FnPgSg                                                               | FnPg | FnPgSg | FnPg |             | -6                      | -4 | -2 | 0 | 2 | 4 | 6 |  |
| FN0321  | -0.193                 | 13.971               | 1.807e-1 | 5.161e-1 | 103    | 70   | 110.5392  | 95.9098   |                                                                      |      |        |      |             |                         |    |    |   |   |   |   |  |
|         |                        |                      |          |          | 92     | 175  | 126.5019  | 175.0000  | AAL94527.1  Heat shock protein htpG                                  |      |        |      |             |                         |    |    |   |   |   |   |  |
| FN0322  | -0.065                 | 21.505               | 2.509e-1 | 8.028e-1 | 1688   | 934  | 1811.5544 | 1279.7106 |                                                                      |      |        |      |             |                         |    |    |   |   |   |   |  |
|         |                        |                      |          |          | 1136   | 2250 | 1562.0235 | 2250.0000 | AAL94528.1  Fructose-bisphosphate aldolase                           |      |        |      |             |                         |    |    |   |   |   |   |  |
| FN0325  | 5.242                  | 9.320                |          |          | 122    | 3    | 130.9299  | 4.1104    |                                                                      |      |        |      |             |                         |    |    |   |   |   |   |  |
|         |                        |                      |          |          | 131    |      | 180.1277  |           | AAL94529.1  LSU ribosomal protein L20P                               |      |        |      |             |                         |    |    |   |   |   |   |  |
| FN0326  |                        |                      |          |          | 16     |      | 17.1711   |           |                                                                      |      |        |      |             |                         |    |    |   |   |   |   |  |
|         |                        |                      |          |          | 18     |      | 24.7504   |           | AAL94530.1  LSU ribosomal protein L35P                               |      |        |      |             |                         |    |    |   |   |   |   |  |
| FN0327  | 0.147                  | 9.194                |          |          | 18     |      | 19.3175   |           |                                                                      |      |        |      |             |                         |    |    |   |   |   |   |  |
|         |                        |                      |          |          | 23     | 23   | 31.6255   | 23.0000   | AAL94531.1  Bacterial Protein Translation Initiation Factor 3 (IF-3) |      |        |      |             |                         |    |    |   |   |   |   |  |
| FN0329  | -0.292                 | 17.604               | 1.452e-1 | 3.843e-1 | 347    | 472  | 372.3989  | 646.7060  |                                                                      |      |        |      |             |                         |    |    |   |   |   |   |  |
|         |                        |                      |          |          | 316    | 341  | 434.5066  | 341.0000  | AAL94533.1  LSU ribosomal protein L13P                               |      |        |      |             |                         |    |    |   |   |   |   |  |
| FN0330  | 1.977                  | 13.137               | 1.227e-4 | 1.328e-5 | 187    | 45   | 200.6876  | 61.6563   |                                                                      |      |        |      |             |                         |    |    |   |   |   |   |  |
|         |                        |                      |          |          | 128    | 34   | 176.0027  | 34.0000   | AAL94534.1  SSU ribosomal protein S9P                                |      |        |      |             |                         |    |    |   |   |   |   |  |
| FN0331  | 0.862                  | 10.992               | 6.879e-2 | 1.261e-1 | 57     | 8    | 61.1722   | 10.9611   |                                                                      |      |        |      |             |                         |    |    |   |   |   |   |  |
|         |                        |                      |          |          | 44     | 56   | 60.5009   | 56.0000   | AAL94535.1  Hypothetical protein                                     |      |        |      |             |                         |    |    |   |   |   |   |  |
| FN0332  | 0.102                  | 5.717                |          |          | 7      |      | 7.5124    |           |                                                                      |      |        |      |             |                         |    |    |   |   |   |   |  |
|         |                        |                      |          |          |        | 7    |           | 7.0000    | AAL94536.1  Magnesium and cobalt transport protein corA              |      |        |      |             |                         |    |    |   |   |   |   |  |
| FN0333  |                        |                      |          |          |        |      |           |           |                                                                      |      |        |      |             |                         |    |    |   |   |   |   |  |
|         |                        |                      |          |          |        | 8    |           | 8.0000    | AAL94537.1  Glycerol uptake operon antiterminator regulatory protein |      |        |      |             |                         |    |    |   |   |   |   |  |
| FN0334  | 0.084                  | 14.135               | 2.331e-1 | 7.288e-1 | 128    | 69   | 137.3691  | 94.5396   |                                                                      |      |        |      |             |                         |    |    |   |   |   |   |  |
|         |                        |                      |          |          | 101    | 166  | 138.8771  | 166.0000  | AAL94538.1  Aspartate/aromatic aminotransferase                      |      |        |      |             |                         |    |    |   |   |   |   |  |
| FN0335  | -0.207                 | 19.484               | 1.993e-1 | 5.932e-1 | 764    | 932  | 819.9216  | 1276.9703 |                                                                      |      |        |      |             |                         |    |    |   |   |   |   |  |
|         |                        |                      |          |          | 563    | 563  | 774.1367  | 563.0000  | AAL94539.1  Outer membrane porin F                                   |      |        |      |             |                         |    |    |   |   |   |   |  |
| FN0336  | 0.969                  | 10.878               |          |          | 67     |      | 71.9041   |           |                                                                      |      |        |      |             |                         |    |    |   |   |   |   |  |
|         |                        |                      |          |          | 36     | 31   | 49.5007   | 31.0000   | AAL94540.1  Hypothetical protein                                     |      |        |      |             |                         |    |    |   |   |   |   |  |
| FN0341  | 1.228                  | 11.871               |          |          | 90     |      | 96.5876   |           |                                                                      |      |        |      |             |                         |    |    |   |   |   |   |  |
|         |                        |                      |          |          | 66     | 40   | 90.7514   | 40.0000   | AAL94545.1  transport protein                                        |      |        |      |             |                         |    |    |   |   |   |   |  |
| FN0342  | 0.387                  | 10.885               | 1.069e-1 | 2.45e-1  | 44     | 38   | 47.2206   | 52.0653   |                                                                      |      |        |      |             |                         |    |    |   |   |   |   |  |
|         |                        |                      |          |          | 38     | 24   | 52.2508   | 24.0000   | AAL94546.1  Peptidyl-prolyl cis-trans isomerase                      |      |        |      |             |                         |    |    |   |   |   |   |  |
| FN0347  | -0.747                 | 10.242               | 1.255e-1 | 3.104e-1 | 27     | 14   | 28.9763   | 19.1820   |                                                                      |      |        |      |             |                         |    |    |   |   |   |   |  |
|         |                        |                      |          |          | 18     | 71   | 24.7504   | 71.0000   | AAL94551.1  Phosphatidylserine decarboxylase                         |      |        |      |             |                         |    |    |   |   |   |   |  |

Show detected proteins only  
 Show all proteins  
 Filter by category:

Proteins found: 1305

Enter (or paste) list of ORFs

Find ORFs

Test Cutoff

q-Value

p-Value

.005

| Signif | Direction | Applies To   |
|--------|-----------|--------------|
| yes    | +         | ratios, bars |
| no     | n/a       | bars         |
| yes    | -         | ratios, bars |
| yes    | +         | p-, q-Values |
| yes    | -         | p-, q-Values |

Dot Plots Dot Plots

Fn Summary Table FnPg vs Fn FnSg vs Fn FnPgSg vs Fn FnPgSg vs FnPg FnSg vs FnPg FnPgSg vs FnSg Fn Coverage

| Protein | FnPgSg vs FnPg         |                      |          |          | Raw    |      | Normalized |          | Description                                                 | Log <sub>2</sub> Ratios |    |    |   |   |   |   |
|---------|------------------------|----------------------|----------|----------|--------|------|------------|----------|-------------------------------------------------------------|-------------------------|----|----|---|---|---|---|
|         | Log <sub>2</sub> Ratio | Log <sub>2</sub> Sum | q-Value  | p-Value  | FnPgSg | FnPg | FnPgSg     | FnPg     |                                                             | -6                      | -4 | -2 | 0 | 2 | 4 | 6 |
| FN0348  | -0.139                 | 15.529               | 2.036e-1 | 6.118e-1 | 203    | 120  | 217.8587   | 164.4168 | AAL94552.1  Nicotinate phosphoribosyltransferase            |                         |    |    |   |   |   |   |
|         |                        |                      |          |          | 143    | 292  | 196.6280   | 292.0000 |                                                             |                         |    |    |   |   |   |   |
| FN0349  | -1.005                 | 7.853                |          |          | 10     | 11   | 10.7320    | 15.0715  | AAL94553.1  D-Tyr-tRNATyr deacylase                         |                         |    |    |   |   |   |   |
|         |                        |                      |          |          |        | 28   |            | 28.0000  |                                                             |                         |    |    |   |   |   |   |
| FN0351  | 0.241                  | 13.866               | 2.225e-1 | 6.861e-1 | 122    | 140  | 130.9299   | 191.8196 | AAL94555.1  unknown                                         |                         |    |    |   |   |   |   |
|         |                        |                      |          |          | 98     | 33   | 134.7520   | 33.0000  |                                                             |                         |    |    |   |   |   |   |
| FN0352  | -0.831                 | 10.479               | 8.637e-2 | 1.745e-1 | 31     | 21   | 33.2691    | 28.7729  | AAL94556.1  NA+/H+ antiporter NHAC                          |                         |    |    |   |   |   |   |
|         |                        |                      |          |          | 17     | 72   | 23.3754    | 72.0000  |                                                             |                         |    |    |   |   |   |   |
| FN0355  | -0.394                 | 14.520               | 1.029e-1 | 2.298e-1 | 116    | 93   | 124.4907   | 127.4230 | AAL94558.1  S-adenosylmethionine synthetase                 |                         |    |    |   |   |   |   |
|         |                        |                      |          |          | 104    | 224  | 143.0022   | 224.0000 |                                                             |                         |    |    |   |   |   |   |
| FN0356  | -1.084                 | 8.239                | 6.211e-2 | 1.098e-1 | 12     | 26   | 12.8783    | 35.6236  | AAL94559.1  Lactoylglutathione lyase                        |                         |    |    |   |   |   |   |
|         |                        |                      |          |          | 8      | 15   | 11.0002    | 15.0000  |                                                             |                         |    |    |   |   |   |   |
| FN0357  | 0.188                  | 7.458                | 2.124e-1 | 6.466e-1 | 11     | 5    | 11.8052    | 6.8507   | AAL94560.1  ATP synthase epsilon chain, sodium ion specific |                         |    |    |   |   |   |   |
|         |                        |                      |          |          | 12     | 18   | 16.5002    | 18.0000  |                                                             |                         |    |    |   |   |   |   |
| FN0358  | -0.063                 | 16.363               | 2.578e-2 | 3.046e-2 | 268    | 212  | 287.6165   | 290.4696 | AAL94561.1  ATP synthase beta chain, sodium ion specific    |                         |    |    |   |   |   |   |
|         |                        |                      |          |          | 204    | 303  | 280.5042   | 303.0000 |                                                             |                         |    |    |   |   |   |   |
| FN0359  | 0.050                  | 11.378               | 2.594e-1 | 8.397e-1 | 53     | 47   | 56.8794    | 64.3966  | AAL94562.1  ATP synthase gamma chain, sodium ion specific   |                         |    |    |   |   |   |   |
|         |                        |                      |          |          | 35     | 37   | 48.1257    | 37.0000  |                                                             |                         |    |    |   |   |   |   |
| FN0360  | -0.161                 | 13.845               | 2.234e-2 | 2.484e-2 | 101    | 96   | 108.3928   | 131.5334 | AAL94563.1  ATP synthase alpha chain, sodium ion specific   |                         |    |    |   |   |   |   |
|         |                        |                      |          |          | 88     | 125  | 121.0018   | 125.0000 |                                                             |                         |    |    |   |   |   |   |
| FN0361  | 0.258                  | 9.481                | 1.512e-1 | 4.057e-1 | 25     | 24   | 26.8299    | 32.8834  | AAL94564.1  ATP synthase delta chain, sodium ion specific   |                         |    |    |   |   |   |   |
|         |                        |                      |          |          | 23     | 16   | 31.6255    | 16.0000  |                                                             |                         |    |    |   |   |   |   |
| FN0362  | 0.017                  | 9.926                |          |          | 29     |      | 31.1227    |          | AAL94565.1  ATP synthase B chain, sodium ion specific       |                         |    |    |   |   |   |   |
|         |                        |                      |          |          | 23     | 31   | 31.6255    | 31.0000  |                                                             |                         |    |    |   |   |   |   |
| FN0364  | -0.653                 | 6.748                |          |          | 9      |      | 9.6588     |          | AAL94567.1  ATP synthase A chain, sodium ion specific       |                         |    |    |   |   |   |   |
|         |                        |                      |          |          | 5      | 13   | 6.8751     | 13.0000  |                                                             |                         |    |    |   |   |   |   |
| FN0366  | 0.610                  | 15.795               | 2.972e-3 | 1.209e-3 | 253    | 127  | 271.5185   | 174.0078 | AAL94569.1  Phosphoglucosamine mutase                       |                         |    |    |   |   |   |   |
|         |                        |                      |          |          | 231    | 212  | 317.6298   | 212.0000 |                                                             |                         |    |    |   |   |   |   |
| FN0368  | -0.245                 | 13.315               | 1.467e-1 | 3.897e-1 | 78     | 59   | 83.7093    | 80.8383  | AAL94571.1  Adenylosuccinate lyase                          |                         |    |    |   |   |   |   |
|         |                        |                      |          |          | 74     | 139  | 101.7515   | 139.0000 |                                                             |                         |    |    |   |   |   |   |
| FN0370  | -0.329                 | 9.055                | 1.841e-1 | 5.298e-1 | 14     | 10   | 15.0247    | 13.7014  | AAL94573.1  Signal peptidase I                              |                         |    |    |   |   |   |   |
|         |                        |                      |          |          | 19     | 38   | 26.1254    | 38.0000  |                                                             |                         |    |    |   |   |   |   |

Show detected proteins only  
 Show all proteins  
 Filter by category:

Proteins found: 1305

Test Cutoff

| Signif | Direction | Applies To   |
|--------|-----------|--------------|
| yes    | +         | ratios, bars |
| no     | n/a       | bars         |
| yes    | -         | ratios, bars |
| yes    | +         | p-, q-Values |
| yes    | -         |              |

Fn Summary Table FnPg vs Fn FnSg vs Fn FnPgSg vs Fn FnPgSg vs FnPg FnSg vs FnPg FnPgSg vs FnSg Fn Coverage

| Protein | FnPgSg vs FnPg         |                      |          |          | Raw    |      | Normalized |          | Description                                                   | Log <sub>2</sub> Ratios |    |    |   |   |   |   |
|---------|------------------------|----------------------|----------|----------|--------|------|------------|----------|---------------------------------------------------------------|-------------------------|----|----|---|---|---|---|
|         | Log <sub>2</sub> Ratio | Log <sub>2</sub> Sum | q-Value  | p-Value  | FnPgSg | FnPg | FnPgSg     | FnPg     |                                                               | -6                      | -4 | -2 | 0 | 2 | 4 | 6 |
| FN0371  | 1.802                  | 11.250               | 5.343e-3 | 2.773e-3 | 100    | 32   | 107.3196   | 43.8445  | AAL94574.1  Hypothetical protein                              |                         |    |    |   |   |   |   |
|         |                        |                      |          |          | 56     | 9    | 77.0012    | 9.0000   |                                                               |                         |    |    |   |   |   |   |
| FN0374  |                        |                      |          |          |        |      |            |          | AAL94577.1  Single-stranded-DNA-specific exonuclease recJ     |                         |    |    |   |   |   |   |
|         |                        |                      |          |          |        | 9    |            | 12.3313  |                                                               |                         |    |    |   |   |   |   |
| FN0375  | 0.020                  | 18.116               | 2.581e-1 | 8.339e-1 | 466    | 353  | 500.1092   | 483.6594 | AAL94578.1  Iron(III)-binding protein                         |                         |    |    |   |   |   |   |
|         |                        |                      |          |          | 417    | 575  | 573.3836   | 575.0000 |                                                               |                         |    |    |   |   |   |   |
| FN0376  | -1.174                 | 11.959               | 4.776e-3 | 2.368e-3 | 36     | 61   | 38.6350    | 83.5785  | AAL94579.1  Iron(III)-transport ATP-binding protein sfuC      |                         |    |    |   |   |   |   |
|         |                        |                      |          |          | 33     | 106  | 45.3757    | 106.0000 |                                                               |                         |    |    |   |   |   |   |
| FN0377  |                        |                      |          |          | 39     |      | 41.8546    |          | AAL94580.1  Iron(III)-transport system permease protein sfuB  |                         |    |    |   |   |   |   |
|         |                        |                      |          |          | 7      |      | 9.6251     |          |                                                               |                         |    |    |   |   |   |   |
| FN0378  |                        |                      |          |          | 6      |      | 6.4392     |          | AAL94581.1  UDP-glucose 4-epimerase                           |                         |    |    |   |   |   |   |
|         |                        |                      |          |          | 11     |      | 15.1252    |          |                                                               |                         |    |    |   |   |   |   |
| FN0379  | 0.544                  | 6.537                | 9.755e-2 | 2.107e-1 | 14     | 8    | 15.0247    | 10.9611  | AAL94582.1  Hypothetical protein                              |                         |    |    |   |   |   |   |
|         |                        |                      |          |          | 6      | 5    | 8.2501     | 5.0000   |                                                               |                         |    |    |   |   |   |   |
| FN0380  | 0.459                  | 5.629                |          |          |        |      |            |          | AAL94583.1  unknown                                           |                         |    |    |   |   |   |   |
|         |                        |                      |          |          | 6      | 6    | 8.2501     | 6.0000   |                                                               |                         |    |    |   |   |   |   |
| FN0381  |                        |                      |          |          | 20     |      | 21.4639    |          | AAL94584.1  unknown                                           |                         |    |    |   |   |   |   |
|         |                        |                      |          |          | 18     |      | 24.7504    |          |                                                               |                         |    |    |   |   |   |   |
| FN0384  | 1.679                  | 5.758                |          |          | 13     | 3    | 13.9515    | 4.1104   | AAL94587.1  Hypothetical protein                              |                         |    |    |   |   |   |   |
|         |                        |                      |          |          | 9      |      | 12.3752    |          |                                                               |                         |    |    |   |   |   |   |
| FN0385  |                        |                      |          |          |        |      |            |          | AAL94588.1  Hypothetical protein                              |                         |    |    |   |   |   |   |
|         |                        |                      |          |          |        | 5    |            | 5.0000   |                                                               |                         |    |    |   |   |   |   |
| FN0387  | 0.954                  | 9.949                | 9.124e-4 | 2.082e-4 | 38     | 14   | 40.7814    | 19.1820  | AAL94590.1  Fusobacterium outer membrane protein family       |                         |    |    |   |   |   |   |
|         |                        |                      |          |          | 34     | 26   | 46.7507    | 26.0000  |                                                               |                         |    |    |   |   |   |   |
| FN0390  | 0.143                  | 13.042               | 2.207e-1 | 6.789e-1 | 103    | 40   | 110.5392   | 54.8056  | AAL94593.1  Hypothetical protein                              |                         |    |    |   |   |   |   |
|         |                        |                      |          |          | 60     | 120  | 82.5012    | 120.0000 |                                                               |                         |    |    |   |   |   |   |
| FN0391  | -0.910                 | 8.767                | 1.328e-1 | 3.384e-1 | 13     | 6    | 13.9515    | 8.2208   | AAL94594.1  Hydrolase (HAD superfamily)                       |                         |    |    |   |   |   |   |
|         |                        |                      |          |          | 12     | 49   | 16.5002    | 49.0000  |                                                               |                         |    |    |   |   |   |   |
| FN0392  | 0.656                  | 5.300                |          |          | 7      |      | 7.5124     |          | AAL94595.1  Oxygen-independent coproporphyrinogen III oxidase |                         |    |    |   |   |   |   |
|         |                        |                      |          |          | 6      | 5    | 8.2501     | 5.0000   |                                                               |                         |    |    |   |   |   |   |
| FN0393  | -1.731                 | 6.615                | 7.869e-3 | 5.162e-3 | 5      | 11   | 5.3660     | 15.0715  | AAL94596.1  Polysaccharide deacetylase                        |                         |    |    |   |   |   |   |
|         |                        |                      |          |          | 4      | 21   | 5.5001     | 21.0000  |                                                               |                         |    |    |   |   |   |   |

Show detected proteins only  
 Show all proteins  
 Filter by category:

Proteins found: 1305

Test Cutoff

| Signif | Direction | Applies To   |
|--------|-----------|--------------|
| yes    | +         | ratios, bars |
| no     | n/a       | bars         |
| yes    | -         | ratios, bars |
| yes    | +         | p-, q-Values |
| yes    | -         |              |

Fn Summary Table FnPg vs Fn FnSg vs Fn FnPgSg vs Fn FnPgSg vs FnPg FnSg vs FnPg FnPgSg vs FnSg Fn Coverage

| Protein | FnPgSg vs FnPg         |                      |          |          | Raw    |      |           |           | Normalized |      |        |      | Description | Log <sub>2</sub> Ratios |    |    |   |   |   |   |  |  |
|---------|------------------------|----------------------|----------|----------|--------|------|-----------|-----------|------------|------|--------|------|-------------|-------------------------|----|----|---|---|---|---|--|--|
|         | Log <sub>2</sub> Ratio | Log <sub>2</sub> Sum | q-Value  | p-Value  | FnPgSg | FnPg | FnPgSg    | FnPg      | FnPgSg     | FnPg | FnPgSg | FnPg |             | -6                      | -4 | -2 | 0 | 2 | 4 | 6 |  |  |
| FN0394  | -1.421                 | 6.795                |          |          | 6      | 4    | 6.4392    | 5.4806    |            |      |        |      |             |                         |    |    |   |   |   |   |  |  |
|         |                        |                      |          |          |        |      |           |           |            |      |        |      |             |                         |    |    |   |   |   |   |  |  |
| FN0396  | -0.014                 | 24.392               | 2.315e-1 | 7.221e-1 | 4210   | 3549 | 4518.1541 | 4862.6263 |            |      |        |      |             |                         |    |    |   |   |   |   |  |  |
|         |                        |                      |          |          | 3505   | 4566 | 4819.4477 | 4566.0000 |            |      |        |      |             |                         |    |    |   |   |   |   |  |  |
| FN0397  | 0.344                  | 11.196               |          |          | 53     |      | 56.8794   |           |            |      |        |      |             |                         |    |    |   |   |   |   |  |  |
|         |                        |                      |          |          | 38     | 43   | 52.2508   | 43.0000   |            |      |        |      |             |                         |    |    |   |   |   |   |  |  |
| FN0398  | 0.552                  | 10.881               | 6.125e-3 | 3.399e-3 | 48     | 29   | 51.5134   | 39.7341   |            |      |        |      |             |                         |    |    |   |   |   |   |  |  |
|         |                        |                      |          |          | 39     | 32   | 53.6258   | 32.0000   |            |      |        |      |             |                         |    |    |   |   |   |   |  |  |
| FN0399  | 0.176                  | 14.911               | 1.494e-1 | 3.993e-1 | 149    | 98   | 159.9062  | 134.2737  |            |      |        |      |             |                         |    |    |   |   |   |   |  |  |
|         |                        |                      |          |          | 155    | 196  | 213.1282  | 196.0000  |            |      |        |      |             |                         |    |    |   |   |   |   |  |  |
| FN0400  | -0.490                 | 16.632               | 1.36e-2  | 1.205e-2 | 227    | 306  | 243.6154  | 419.2628  |            |      |        |      |             |                         |    |    |   |   |   |   |  |  |
|         |                        |                      |          |          | 214    | 336  | 294.2544  | 336.0000  |            |      |        |      |             |                         |    |    |   |   |   |   |  |  |
| FN0405  | 1.026                  | 13.653               | 1.135e-2 | 9.178e-3 | 175    | 38   | 187.8093  | 52.0653   |            |      |        |      |             |                         |    |    |   |   |   |   |  |  |
|         |                        |                      |          |          | 99     | 107  | 136.1271  | 107.0000  |            |      |        |      |             |                         |    |    |   |   |   |   |  |  |
| FN0406  | 0.769                  | 10.997               | 6.987e-3 | 4.197e-3 | 60     | 25   | 64.3917   | 34.2535   |            |      |        |      |             |                         |    |    |   |   |   |   |  |  |
|         |                        |                      |          |          | 39     | 35   | 53.6258   | 35.0000   |            |      |        |      |             |                         |    |    |   |   |   |   |  |  |
| FN0407  | 2.268                  | 11.053               |          |          | 104    |      | 111.6124  |           |            |      |        |      |             |                         |    |    |   |   |   |   |  |  |
|         |                        |                      |          |          | 66     | 21   | 90.7514   | 21.0000   |            |      |        |      |             |                         |    |    |   |   |   |   |  |  |
| FN0408  | 0.375                  | 12.016               | 1.543e-1 | 4.166e-1 | 61     | 19   | 65.4649   | 26.0327   |            |      |        |      |             |                         |    |    |   |   |   |   |  |  |
|         |                        |                      |          |          | 59     | 87   | 81.1262   | 87.0000   |            |      |        |      |             |                         |    |    |   |   |   |   |  |  |
| FN0409  | 1.127                  | 17.122               | 9.283e-4 | 2.139e-4 | 475    | 219  | 509.7680  | 300.0606  |            |      |        |      |             |                         |    |    |   |   |   |   |  |  |
|         |                        |                      |          |          | 441    | 211  | 606.3841  | 211.0000  |            |      |        |      |             |                         |    |    |   |   |   |   |  |  |
| FN0410  | 0.368                  | 13.319               | 1.163e-3 | 3.104e-4 | 109    | 62   | 116.9783  | 84.9487   |            |      |        |      |             |                         |    |    |   |   |   |   |  |  |
|         |                        |                      |          |          | 82     | 93   | 112.7517  | 93.0000   |            |      |        |      |             |                         |    |    |   |   |   |   |  |  |
| FN0413  | -0.701                 | 4.905                |          |          | 4      | 8    | 4.2928    | 10.9611   |            |      |        |      |             |                         |    |    |   |   |   |   |  |  |
|         |                        |                      |          |          |        |      |           |           |            |      |        |      |             |                         |    |    |   |   |   |   |  |  |
| FN0414  |                        |                      |          |          | 6      |      | 6.4392    |           |            |      |        |      |             |                         |    |    |   |   |   |   |  |  |
|         |                        |                      |          |          |        |      |           |           |            |      |        |      |             |                         |    |    |   |   |   |   |  |  |
| FN0416  | -0.163                 | 7.086                |          |          | 9      | 9    | 9.6588    | 12.3313   |            |      |        |      |             |                         |    |    |   |   |   |   |  |  |
|         |                        |                      |          |          | 9      |      | 12.3752   |           |            |      |        |      |             |                         |    |    |   |   |   |   |  |  |
| FN0417  | -0.434                 | 7.645                |          |          | 15     | 12   | 16.0979   | 16.4417   |            |      |        |      |             |                         |    |    |   |   |   |   |  |  |
|         |                        |                      |          |          | 6      |      | 8.2501    |           |            |      |        |      |             |                         |    |    |   |   |   |   |  |  |

Show detected proteins only  
 Show all proteins  
 Filter by category:  
 GO: amino acid transport

Proteins found:  
 1305

Enter (or paste) list of ORFs

**Test**      **Cutoff**

q-Value

p-Value      .005

| Signif | Direction | Applies To   |
|--------|-----------|--------------|
| yes    | +         | ratios, bars |
| no     | n/a       | bars         |
| yes    | -         | ratios, bars |
| yes    | +         | p-, q-Values |
| yes    | -         | p-, q-Values |



Fn Summary Table FnPg vs Fn FnSg vs Fn FnPgSg vs Fn FnPgSg vs FnPg FnSg vs FnPg FnPgSg vs FnSg Fn Coverage

| Protein | FnPgSg vs FnPg         |                      |          |          | Raw    |      | Normalized |          | Description                                                        | Log <sub>2</sub> Ratios |    |    |   |   |   |   |
|---------|------------------------|----------------------|----------|----------|--------|------|------------|----------|--------------------------------------------------------------------|-------------------------|----|----|---|---|---|---|
|         | Log <sub>2</sub> Ratio | Log <sub>2</sub> Sum | q-Value  | p-Value  | FnPgSg | FnPg | FnPgSg     | FnPg     |                                                                    | -6                      | -4 | -2 | 0 | 2 | 4 | 6 |
| FN0418  | -3.964                 | 8.168                |          |          | 4      |      | 4.2928     |          | AAL94621.1  Uracil phosphoribosyltransferase                       |                         |    |    |   |   |   |   |
|         |                        |                      |          |          |        | 67   |            | 67.0000  |                                                                    |                         |    |    |   |   |   |   |
| FN0419  | -0.968                 | 6.780                | 1.024e-2 | 7.839e-3 | 5      | 9    | 5.3660     | 12.3313  | AAL94622.1  Aspartate carbamoyltransferase                         |                         |    |    |   |   |   |   |
|         |                        |                      |          |          | 7      | 17   | 9.6251     | 17.0000  |                                                                    |                         |    |    |   |   |   |   |
| FN0420  | -3.225                 | 6.599                |          |          | 3      | 6    | 3.2196     | 8.2208   | AAL94623.1  Dihydroorotase                                         |                         |    |    |   |   |   |   |
|         |                        |                      |          |          |        | 52   |            | 52.0000  |                                                                    |                         |    |    |   |   |   |   |
| FN0421  | -2.316                 | 8.328                |          |          | 6      |      | 6.4392     |          | AAL94624.1  Carbamoyl-phosphate synthase small chain               |                         |    |    |   |   |   |   |
|         |                        |                      |          |          | 7      | 40   | 9.6251     | 40.0000  |                                                                    |                         |    |    |   |   |   |   |
| FN0422  | -0.392                 | 12.843               | 2.026e-1 | 6.076e-1 | 69     | 20   | 74.0505    | 27.4028  | AAL94625.1  Carbamoyl-phosphate synthase large chain               |                         |    |    |   |   |   |   |
|         |                        |                      |          |          | 55     | 169  | 75.6261    | 169.0000 |                                                                    |                         |    |    |   |   |   |   |
| FN0423  | -1.386                 | 6.614                |          |          | 5      |      | 5.3660     |          | AAL94626.1  Dihydroorotase dehydrogenase electron transfer subunit |                         |    |    |   |   |   |   |
|         |                        |                      |          |          | 5      | 16   | 6.8751     | 16.0000  |                                                                    |                         |    |    |   |   |   |   |
| FN0424  | -1.643                 | 5.017                |          |          | 3      | 3    | 3.2196     | 4.1104   | AAL94627.1  Dihydroorotase dehydrogenase                           |                         |    |    |   |   |   |   |
|         |                        |                      |          |          |        | 16   |            | 16.0000  |                                                                    |                         |    |    |   |   |   |   |
| FN0426  | -0.596                 | 9.561                | 1.705e-1 | 4.762e-1 | 25     | 7    | 26.8299    | 9.5910   | AAL94629.1  Orotidine 5'-phosphate decarboxylase                   |                         |    |    |   |   |   |   |
|         |                        |                      |          |          | 13     | 58   | 17.8753    | 58.0000  |                                                                    |                         |    |    |   |   |   |   |
| FN0427  | -0.244                 | 11.133               | 4.001e-2 | 5.756e-2 | 44     | 41   | 47.2206    | 56.1757  | AAL94630.1  Orotate phosphoribosyltransferase                      |                         |    |    |   |   |   |   |
|         |                        |                      |          |          | 29     | 47   | 39.8756    | 47.0000  |                                                                    |                         |    |    |   |   |   |   |
| FN0430  | 0.730                  | 14.369               | 3.995e-2 | 5.745e-2 | 171    | 51   | 183.5165   | 69.8771  | AAL94633.1  LSU ribosomal protein L19P                             |                         |    |    |   |   |   |   |
|         |                        |                      |          |          | 139    | 156  | 191.1279   | 156.0000 |                                                                    |                         |    |    |   |   |   |   |
| FN0435  | -0.888                 | 11.004               | 1.248e-1 | 3.081e-1 | 48     | 17   | 51.5134    | 23.2924  | AAL94634.1  Purine nucleoside phosphorylase                        |                         |    |    |   |   |   |   |
|         |                        |                      |          |          | 11     | 100  | 15.1252    | 100.0000 |                                                                    |                         |    |    |   |   |   |   |
| FN0436  | -1.698                 | 10.539               | 2.224e-2 | 2.468e-2 | 13     | 35   | 13.9515    | 47.9549  | AAL94635.1  regulator of kinase autophosphorylation inhibitor      |                         |    |    |   |   |   |   |
|         |                        |                      |          |          | 21     | 91   | 28.8754    | 91.0000  |                                                                    |                         |    |    |   |   |   |   |
| FN0437  | -0.877                 | 6.536                | 1.355e-1 | 3.493e-1 | 3      | 3    | 3.2196     | 4.1104   | AAL94636.1  kinase autophosphorylation inhibitor KipI              |                         |    |    |   |   |   |   |
|         |                        |                      |          |          | 8      | 22   | 11.0002    | 22.0000  |                                                                    |                         |    |    |   |   |   |   |
| FN0439  | -0.348                 | 12.026               | 2.208e-1 | 6.794e-1 | 58     | 10   | 62.2454    | 13.7014  | AAL94638.1  Lactam utilization protein LAMB                        |                         |    |    |   |   |   |   |
|         |                        |                      |          |          | 38     | 132  | 52.2508    | 132.0000 |                                                                    |                         |    |    |   |   |   |   |
| FN0445  |                        |                      |          |          | 6      |      | 6.4392     |          | AAL94641.1  Hypothetical protein                                   |                         |    |    |   |   |   |   |
|         |                        |                      |          |          | 4      |      | 5.5001     |          |                                                                    |                         |    |    |   |   |   |   |
| FN0446  | 0.441                  | 6.714                | 7.506e-3 | 4.744e-3 | 12     | 7    | 12.8783    | 9.5910   | AAL94642.1  Hypothetical protein                                   |                         |    |    |   |   |   |   |
|         |                        |                      |          |          | 8      | 8    | 11.0002    | 8.0000   |                                                                    |                         |    |    |   |   |   |   |

Show detected proteins only  
 Show all proteins  
 Filter by category:

Proteins found: 1305

Enter (or paste) list of ORFs

Find ORFs

Test Cutoff

q-Value .005

p-Value

| Signif | Direction | Applies To   |
|--------|-----------|--------------|
| yes    | +         | ratios, bars |
| no     | n/a       | bars         |
| yes    | -         | ratios, bars |
| yes    | +         | p-, q-Values |
| yes    | -         |              |

Dot Plots Dot Plots

Fn Summary Table FnPg vs Fn FnSg vs Fn FnPgSg vs Fn FnPgSg vs FnPg FnSg vs FnPg FnPgSg vs FnSg Fn Coverage

| Protein | FnPgSg vs FnPg         |                      |          |          | Raw    |      | Normalized |          | Description                                                                  | Log <sub>2</sub> Ratios |    |    |   |   |   |   |
|---------|------------------------|----------------------|----------|----------|--------|------|------------|----------|------------------------------------------------------------------------------|-------------------------|----|----|---|---|---|---|
|         | Log <sub>2</sub> Ratio | Log <sub>2</sub> Sum | q-Value  | p-Value  | FnPgSg | FnPg | FnPgSg     | FnPg     |                                                                              | -6                      | -4 | -2 | 0 | 2 | 4 | 6 |
| FN0447  | -0.483                 | 4.687                |          |          | 4      |      | 4.2928     |          | AAL94643.1  NIFS protein                                                     |                         |    |    |   |   |   |   |
|         |                        |                      |          |          |        | 6    |            | 6.0000   |                                                                              |                         |    |    |   |   |   |   |
| FN0448  |                        |                      |          |          | 3      |      | 4.1251     |          | AAL94644.1  DNA-repair protein                                               |                         |    |    |   |   |   |   |
|         |                        |                      |          |          |        |      |            |          |                                                                              |                         |    |    |   |   |   |   |
| FN0450  | 0.197                  | 8.552                | 9.774e-2 | 2.114e-1 | 22     | 14   | 23.6103    | 19.1820  | AAL94646.1  ABC transporter ATP-binding protein                              |                         |    |    |   |   |   |   |
|         |                        |                      |          |          | 13     | 17   | 17.8753    | 17.0000  |                                                                              |                         |    |    |   |   |   |   |
| FN0451  | -0.348                 | 5.267                |          |          |        |      |            |          | AAL94647.1  Hypothetical protein                                             |                         |    |    |   |   |   |   |
|         |                        |                      |          |          | 4      | 7    | 5.5001     | 7.0000   |                                                                              |                         |    |    |   |   |   |   |
| FN0452  | 0.444                  | 18.490               | 1.609e-1 | 4.405e-1 | 663    | 647  | 711.5288   | 886.4805 | AAL94648.1  Glucosamine--fructose-6-phosphate aminotransferase (isomerizing) |                         |    |    |   |   |   |   |
|         |                        |                      |          |          | 512    | 154  | 704.0106   | 154.0000 |                                                                              |                         |    |    |   |   |   |   |
| FN0453  | -1.007                 | 16.282               | 7.377e-3 | 4.603e-3 | 198    | 255  | 212.4928   | 349.3857 | AAL94649.1  Xaa-Pro aminopeptidase                                           |                         |    |    |   |   |   |   |
|         |                        |                      |          |          | 135    | 451  | 185.6278   | 451.0000 |                                                                              |                         |    |    |   |   |   |   |
| FN0454  | -1.363                 | 13.375               | 5.399e-2 | 8.967e-2 | 57     | 69   | 61.1722    | 94.5396  | AAL94650.1  Aldehyde dehydrogenase B                                         |                         |    |    |   |   |   |   |
|         |                        |                      |          |          | 49     | 236  | 67.3760    | 236.0000 |                                                                              |                         |    |    |   |   |   |   |
| FN0455  | 0.106                  | 17.315               | 1.844e-1 | 5.307e-1 | 331    | 315  | 355.2278   | 431.5941 | AAL94651.1  Rubrerythrin                                                     |                         |    |    |   |   |   |   |
|         |                        |                      |          |          | 351    | 347  | 482.6323   | 347.0000 |                                                                              |                         |    |    |   |   |   |   |
| FN0456  | 1.270                  | 8.967                | 1.495e-3 | 4.502e-4 | 34     | 13   | 36.4887    | 17.8118  | AAL94652.1  Hypothetical cytosolic protein                                   |                         |    |    |   |   |   |   |
|         |                        |                      |          |          | 24     | 11   | 33.0005    | 11.0000  |                                                                              |                         |    |    |   |   |   |   |
| FN0458  | -0.888                 | 6.451                |          |          |        | 12   |            | 16.4417  | AAL94654.1  Hypothetical Exported Protein                                    |                         |    |    |   |   |   |   |
|         |                        |                      |          |          | 5      | 9    | 6.8751     | 9.0000   |                                                                              |                         |    |    |   |   |   |   |
| FN0460  | -1.301                 | 10.313               |          |          | 18     |      | 19.3175    |          | AAL94656.1  Delta-aminolevulinic acid dehydratase                            |                         |    |    |   |   |   |   |
|         |                        |                      |          |          | 19     | 56   | 26.1254    | 56.0000  |                                                                              |                         |    |    |   |   |   |   |
| FN0461  | -0.798                 | 16.288               | 8.224e-2 | 1.623e-1 | 187    | 381  | 200.6876   | 522.0233 | AAL94657.1  Probable sigma(54) modulation protein                            |                         |    |    |   |   |   |   |
|         |                        |                      |          |          | 166    | 224  | 228.2534   | 224.0000 |                                                                              |                         |    |    |   |   |   |   |
| FN0462  | -1.445                 | 9.770                | 3.763e-2 | 5.285e-2 | 18     | 23   | 19.3175    | 31.5132  | AAL94658.1  DNA mismatch repair protein mutL                                 |                         |    |    |   |   |   |   |
|         |                        |                      |          |          | 12     | 66   | 16.5002    | 66.0000  |                                                                              |                         |    |    |   |   |   |   |
| FN0465  | -1.526                 | 15.038               | 8.973e-2 | 1.849e-1 | 104    | 377  | 111.6124   | 516.5427 | AAL94661.1  Hypothetical protein                                             |                         |    |    |   |   |   |   |
|         |                        |                      |          |          | 76     | 106  | 104.5016   | 106.0000 |                                                                              |                         |    |    |   |   |   |   |
| FN0466  | -0.443                 | 17.501               | 4.501e-2 | 6.802e-2 | 295    | 428  | 316.5927   | 586.4199 | AAL94662.1  Lysyl-tRNA synthetase                                            |                         |    |    |   |   |   |   |
|         |                        |                      |          |          | 307    | 418  | 422.1314   | 418.0000 |                                                                              |                         |    |    |   |   |   |   |
| FN0470  | -0.229                 | 18.019               | 9.585e-2 | 2.049e-1 | 427    | 343  | 458.2546   | 469.9580 | AAL94666.1  Putative efflux pump component MtrF                              |                         |    |    |   |   |   |   |
|         |                        |                      |          |          | 359    | 646  | 493.6324   | 646.0000 |                                                                              |                         |    |    |   |   |   |   |

Show detected proteins only  
 Show all proteins  
 Filter by category:

Proteins found: 1305

Enter (or paste) list of ORFs

Find ORFs

Test Cutoff

q-Value

p-Value

.005

| Signif | Direction | Applies To   |
|--------|-----------|--------------|
| yes    | +         | ratios, bars |
| no     | n/a       | bars         |
| yes    | -         | ratios, bars |
| yes    | +         | p-, q-Values |
| yes    | -         | p-, q-Values |

Dot Plots Dot Plots

Fn Summary Table FnPg vs Fn FnSg vs Fn FnPgSg vs Fn FnPgSg vs FnPg FnSg vs FnPg FnPgSg vs FnSg Fn Coverage

| Protein | FnPgSg vs FnPg         |                      |          |          | Raw    |       |           |           | Normalized                                            |      |        |      | Description | Log <sub>2</sub> Ratios |    |    |   |   |   |   |
|---------|------------------------|----------------------|----------|----------|--------|-------|-----------|-----------|-------------------------------------------------------|------|--------|------|-------------|-------------------------|----|----|---|---|---|---|
|         | Log <sub>2</sub> Ratio | Log <sub>2</sub> Sum | q-Value  | p-Value  | FnPgSg | FnPg  | FnPgSg    | FnPg      | FnPgSg                                                | FnPg | FnPgSg | FnPg |             | -6                      | -4 | -2 | 0 | 2 | 4 | 6 |
| FN0472  | 0.089                  | 26.187               | 1.916e-1 | 5.605e-1 | 8444   | 7225  | 9062.0649 | 9899.2604 |                                                       |      |        |      |             |                         |    |    |   |   |   |   |
|         |                        |                      |          |          | 6518   | 7052  | 8962.3851 | 7052.0000 | AAL94668.1  Flavodoxin                                |      |        |      |             |                         |    |    |   |   |   |   |
| FN0475  | -0.503                 | 8.416                |          |          | 11     |       | 11.8052   |           |                                                       |      |        |      |             |                         |    |    |   |   |   |   |
|         |                        |                      |          |          | 14     | 22    | 19.2503   | 22.0000   | AAL94671.1  MIAB protein                              |      |        |      |             |                         |    |    |   |   |   |   |
| FN0476  | 0.593                  | 12.038               | 4.505e-2 | 6.809e-2 | 69     | 26    | 74.0505   | 35.6236   |                                                       |      |        |      |             |                         |    |    |   |   |   |   |
|         |                        |                      |          |          | 62     | 70    | 85.2513   | 70.0000   | AAL94672.1  Transcription termination factor rho      |      |        |      |             |                         |    |    |   |   |   |   |
| FN0477  | -0.362                 | 7.423                | 1.064e-2 | 8.346e-3 | 10     | 10    | 10.7320   | 13.7014   |                                                       |      |        |      |             |                         |    |    |   |   |   |   |
|         |                        |                      |          |          | 9      | 16    | 12.3752   | 16.0000   | AAL94673.1  Cell wall endopeptidase family M23/M37    |      |        |      |             |                         |    |    |   |   |   |   |
| FN0478  | -1.686                 | 8.489                |          |          | 12     |       | 12.8783   |           |                                                       |      |        |      |             |                         |    |    |   |   |   |   |
|         |                        |                      |          |          | 6      | 34    | 8.2501    | 34.0000   | AAL94674.1  GcpE protein                              |      |        |      |             |                         |    |    |   |   |   |   |
| FN0481  |                        |                      |          |          |        |       |           |           |                                                       |      |        |      |             |                         |    |    |   |   |   |   |
|         |                        |                      |          |          |        |       | 11        | 11.0000   | AAL94677.1  unknown                                   |      |        |      |             |                         |    |    |   |   |   |   |
| FN0482  | 3.233                  | 8.403                |          |          | 59     |       | 63.3185   |           |                                                       |      |        |      |             |                         |    |    |   |   |   |   |
|         |                        |                      |          |          | 36     | 6     | 49.5007   | 6.0000    | AAL94678.1  LSU ribosomal protein L31P                |      |        |      |             |                         |    |    |   |   |   |   |
| FN0483  | 0.718                  | 12.927               | 2.902e-2 | 3.626e-2 | 111    | 34    | 119.1247  | 46.5848   |                                                       |      |        |      |             |                         |    |    |   |   |   |   |
|         |                        |                      |          |          | 78     | 91    | 107.2516  | 91.0000   | AAL94679.1  Uracil phosphoribosyltransferase          |      |        |      |             |                         |    |    |   |   |   |   |
| FN0484  | -0.220                 | 4.424                |          |          | 4      |       | 4.2928    |           |                                                       |      |        |      |             |                         |    |    |   |   |   |   |
|         |                        |                      |          |          |        | 5     | 5.0000    |           | AAL94680.1  Lipase                                    |      |        |      |             |                         |    |    |   |   |   |   |
| FN0487  | 0.119                  | 20.282               | 2.164e-1 | 6.62e-1  | 1065   | 548   | 1142.9535 | 750.8366  |                                                       |      |        |      |             |                         |    |    |   |   |   |   |
|         |                        |                      |          |          | 880    | 1416  | 1210.0182 | 1416.0000 | AAL94683.1  2-hydroxyglutarate dehydrogenase          |      |        |      |             |                         |    |    |   |   |   |   |
| FN0488  | -0.073                 | 23.789               | 2.513e-1 | 8.049e-1 | 3228   | 1959  | 3464.2759 | 2684.1040 |                                                       |      |        |      |             |                         |    |    |   |   |   |   |
|         |                        |                      |          |          | 2879   | 5124  | 3958.6847 | 5124.0000 | AAL94684.1  NAD-specific glutamate dehydrogenase      |      |        |      |             |                         |    |    |   |   |   |   |
| FN0489  | 1.675                  | 8.594                |          |          | 36     |       | 38.6350   |           |                                                       |      |        |      |             |                         |    |    |   |   |   |   |
|         |                        |                      |          |          | 23     | 11    | 31.6255   | 11.0000   | AAL94685.1  Prolipoprotein diacylglyceryl transferase |      |        |      |             |                         |    |    |   |   |   |   |
| FN0491  | -2.093                 | 12.665               | 5.09e-2  | 8.176e-2 | 33     | 59    | 35.4155   | 80.8383   |                                                       |      |        |      |             |                         |    |    |   |   |   |   |
|         |                        |                      |          |          | 31     | 252   | 42.6256   | 252.0000  | AAL94687.1  Alanine racemase                          |      |        |      |             |                         |    |    |   |   |   |   |
| FN0493  | -2.003                 | 6.496                | 3.013e-2 | 3.827e-2 | 5      | 19    | 5.3660    | 26.0327   |                                                       |      |        |      |             |                         |    |    |   |   |   |   |
|         |                        |                      |          |          | 3      | 12    | 4.1251    | 12.0000   | AAL94689.1  Hypothetical protein                      |      |        |      |             |                         |    |    |   |   |   |   |
| FN0494  | 1.067                  | 16.710               | 9.095e-4 | 2.072e-4 | 409    | 136   | 438.9371  | 186.3390  |                                                       |      |        |      |             |                         |    |    |   |   |   |   |
|         |                        |                      |          |          | 370    | 266   | 508.7577  | 266.0000  | AAL94690.1  Short chain dehydrogenase                 |      |        |      |             |                         |    |    |   |   |   |   |
| FN0495  | -0.693                 | 26.215               | 5.156e-5 | 2.831e-6 | 6337   | 8224  | 6800.8415 | 11268.030 |                                                       |      |        |      |             |                         |    |    |   |   |   |   |
|         |                        |                      |          |          | 5153   | 11175 | 7085.4818 | 11175.000 | AAL94691.1  Acetyl-CoA acetyltransferase              |      |        |      |             |                         |    |    |   |   |   |   |

Show detected proteins only  
 Show all proteins  
 Filter by category:

Proteins found: 1305

Test Cutoff

| Signif | Direction | Applies To   |
|--------|-----------|--------------|
| yes    | +         | ratios, bars |
| no     | n/a       | bars         |
| yes    | -         | ratios, bars |
| yes    | +         | p-, q-Values |
| yes    | -         | p-, q-Values |

Fn Summary Table FnPg vs Fn FnSg vs Fn FnPgSg vs Fn FnPgSg vs FnPg FnSg vs FnPg FnPgSg vs FnSg Fn Coverage

| Protein | FnPgSg vs FnPg         |                      |          |          | Raw    |      | Normalized |          | Description                                                    | Log <sub>2</sub> Ratios |    |    |   |   |   |   |
|---------|------------------------|----------------------|----------|----------|--------|------|------------|----------|----------------------------------------------------------------|-------------------------|----|----|---|---|---|---|
|         | Log <sub>2</sub> Ratio | Log <sub>2</sub> Sum | q-Value  | p-Value  | FnPgSg | FnPg | FnPgSg     | FnPg     |                                                                | -6                      | -4 | -2 | 0 | 2 | 4 | 6 |
| FN0497  |                        |                      |          |          | 5      |      | 6.8751     |          | AAL94693.1  Plasmid addiction system poison protein            |                         |    |    |   |   |   |   |
| FN0501  | -1.208                 | 16.157               | 5.254e-2 | 8.588e-2 | 156    | 183  | 167.4185   | 250.7356 | AAL94697.1  Ornithine decarboxylase                            |                         |    |    |   |   |   |   |
| FN0502  | 0.127                  | 9.046                |          |          | 23     |      | 24.6835    |          | AAL94698.1  Phosphoheptose isomerase                           |                         |    |    |   |   |   |   |
| FN0503  | 0.456                  | 10.900               | 7.943e-2 | 1.543e-1 | 48     | 18   | 51.5134    | 24.6625  | AAL94699.1  Transcriptional regulatory protein, LYSR family    |                         |    |    |   |   |   |   |
| FN0504  |                        |                      |          |          | 3      |      | 4.1251     |          | AAL94700.1  Arginine permease                                  |                         |    |    |   |   |   |   |
| FN0505  | -1.445                 | 10.779               | 5.441e-2 | 9.08e-2  | 23     | 28   | 24.6835    | 38.3639  | AAL94701.1  Anthranilate synthase component II                 |                         |    |    |   |   |   |   |
| FN0506  | 0.847                  | 15.202               | 1.271e-2 | 1.085e-2 | 279    | 134  | 299.4216   | 183.5987 | AAL94702.1  Arginyl-tRNA synthetase                            |                         |    |    |   |   |   |   |
| FN0511  | -1.270                 | 10.311               | 1.143e-1 | 2.706e-1 | 21     | 10   | 22.5371    | 13.7014  | AAL94707.1  D-lactate dehydrogenase                            |                         |    |    |   |   |   |   |
| FN0512  | -0.540                 | 15.954               | 2.949e-7 | 1.311e-9 | 196    | 223  | 210.3464   | 305.5412 | AAL94708.1  Flavoprotein                                       |                         |    |    |   |   |   |   |
| FN0513  | 2.104                  | 9.160                | 5.135e-4 | 9.2e-5   | 45     | 11   | 48.2938    | 15.0715  | AAL94709.1  Flavodoxin                                         |                         |    |    |   |   |   |   |
| FN0515  |                        |                      |          |          |        |      |            |          | AAL94711.1  Acriflavin resistance protein D                    |                         |    |    |   |   |   |   |
| FN0516  |                        |                      |          |          |        |      |            |          | AAL94712.1  Acriflavin resistance protein E                    |                         |    |    |   |   |   |   |
| FN0517  |                        |                      |          |          |        |      |            |          | AAL94713.1  Outer membrane protein toIC                        |                         |    |    |   |   |   |   |
| FN0519  | -1.477                 | 5.566                |          |          |        | 8    |            | 10.9611  | AAL94715.1  Hypothetical exported 24-amino acid repeat protein |                         |    |    |   |   |   |   |
| FN0522  | -1.278                 | 5.366                |          |          | 3      | 12   | 4.1251     | 12.0000  | AAL94718.1  Exonuclease SBCC                                   |                         |    |    |   |   |   |   |
| FN0523  |                        |                      |          |          |        | 3    |            | 4.1104   | AAL94719.1  Exonuclease SBCCD                                  |                         |    |    |   |   |   |   |

Show detected proteins only  
 Show all proteins  
 Filter by category:

Proteins found:  
1305

Test Cutoff

| Signif | Direction | Applies To   |
|--------|-----------|--------------|
| yes    | +         | ratios, bars |
| no     | n/a       | bars         |
| yes    | -         | ratios, bars |
| yes    | +         | p-, q-Values |
| yes    | -         | p-, q-Values |

Fn Summary Table FnPg vs Fn FnSg vs Fn FnPgSg vs Fn FnPgSg vs FnPg FnSg vs FnPg FnPgSg vs FnSg Fn Coverage

| Protein | FnPgSg vs FnPg         |                      |          |          | Raw    |      | Normalized |          | Description                                                   | Log <sub>2</sub> Ratios |    |    |   |   |   |   |
|---------|------------------------|----------------------|----------|----------|--------|------|------------|----------|---------------------------------------------------------------|-------------------------|----|----|---|---|---|---|
|         | Log <sub>2</sub> Ratio | Log <sub>2</sub> Sum | q-Value  | p-Value  | FnPgSg | FnPg | FnPgSg     | FnPg     |                                                               | -6                      | -4 | -2 | 0 | 2 | 4 | 6 |
| FN0524  | 1.188                  | 7.161                | 1.317e-3 | 3.751e-4 | 17     | 5    | 18.2443    | 6.8507   | AAL94720.1  DNA helicase II                                   |                         |    |    |   |   |   |   |
|         |                        |                      |          |          | 13     | 9    | 17.8753    | 9.0000   |                                                               |                         |    |    |   |   |   |   |
| FN0525  | 0.038                  | 13.901               | 2.818e-1 | 9.405e-1 | 108    | 38   | 115.9051   | 52.0653  | AAL94721.1  Penicillin-binding protein                        |                         |    |    |   |   |   |   |
|         |                        |                      |          |          | 98     | 192  | 134.7520   | 192.0000 |                                                               |                         |    |    |   |   |   |   |
| FN0526  | -0.479                 | 11.237               |          |          | 34     |      | 36.4887    |          | AAL94722.1  Florfenicol resistance protein                    |                         |    |    |   |   |   |   |
|         |                        |                      |          |          | 34     | 58   | 46.7507    | 58.0000  |                                                               |                         |    |    |   |   |   |   |
| FN0527  | -1.927                 | 8.810                | 5.171e-3 | 2.646e-3 | 10     | 26   | 10.7320    | 35.6236  | AAL94723.1  Alanyl-tRNA synthetase                            |                         |    |    |   |   |   |   |
|         |                        |                      |          |          | 8      | 47   | 11.0002    | 47.0000  |                                                               |                         |    |    |   |   |   |   |
| FN0528  | 1.857                  | 17.912               | 9.068e-3 | 6.487e-3 | 951    | 340  | 1020.6092  | 465.8475 | AAL94724.1  Cold shock protein                                |                         |    |    |   |   |   |   |
|         |                        |                      |          |          | 633    | 56   | 870.3881   | 56.0000  |                                                               |                         |    |    |   |   |   |   |
| FN0535  | 0.476                  | 11.748               | 1.946e-3 | 6.75e-4  | 61     | 39   | 65.4649    | 53.4355  | AAL94731.1  Hypothetical protein                              |                         |    |    |   |   |   |   |
|         |                        |                      |          |          | 53     | 46   | 72.8761    | 46.0000  |                                                               |                         |    |    |   |   |   |   |
| FN0536  | 0.579                  | 15.463               | 3.396e-2 | 4.578e-2 | 242    | 94   | 259.7134   | 128.7931 | AAL94732.1  DNA polymerase III, beta chain                    |                         |    |    |   |   |   |   |
|         |                        |                      |          |          | 189    | 219  | 259.8789   | 219.0000 |                                                               |                         |    |    |   |   |   |   |
| FN0540  | 0.149                  | 10.225               | 2.428e-1 | 7.688e-1 | 32     | 10   | 34.3423    | 13.7014  | AAL94736.1  Glutamate-1-semialdehyde 2,1-aminomutase          |                         |    |    |   |   |   |   |
|         |                        |                      |          |          | 28     | 52   | 38.5006    | 52.0000  |                                                               |                         |    |    |   |   |   |   |
| FN0542  | -0.621                 | 9.000                |          |          | 17     | 3    | 18.2443    | 4.1104   | AAL94738.1  Beta 1,4 glucosyltransferase                      |                         |    |    |   |   |   |   |
|         |                        |                      |          |          |        | 52   |            | 52.0000  |                                                               |                         |    |    |   |   |   |   |
| FN0543  | 0.163                  | 9.390                | 2.35e-1  | 7.363e-1 | 28     | 8    | 30.0495    | 10.9611  | AAL94739.1  Lipopolysaccharide heptosyltransferase-1          |                         |    |    |   |   |   |   |
|         |                        |                      |          |          | 18     | 38   | 24.7504    | 38.0000  |                                                               |                         |    |    |   |   |   |   |
| FN0544  |                        |                      |          |          |        |      |            |          | AAL94740.1  ADP-heptose:LPS heptosyltransferase II            |                         |    |    |   |   |   |   |
|         |                        |                      |          |          |        | 3    |            | 3.0000   |                                                               |                         |    |    |   |   |   |   |
| FN0546  |                        |                      |          |          |        |      |            |          | AAL94742.1  Lipopolysaccharide core biosynthesis protein rfaQ |                         |    |    |   |   |   |   |
|         |                        |                      |          |          |        | 6    |            | 6.0000   |                                                               |                         |    |    |   |   |   |   |
| FN0547  | 0.493                  | 15.891               | 9.93e-2  | 2.168e-1 | 326    | 88   | 349.8618   | 120.5723 | AAL94743.1  RecA protein                                      |                         |    |    |   |   |   |   |
|         |                        |                      |          |          | 171    | 295  | 235.1285   | 295.0000 |                                                               |                         |    |    |   |   |   |   |
| FN0550  | -0.696                 | 9.240                |          |          | 18     | 34   | 19.3175    | 46.5848  | AAL94746.1  hypothetical Protein                              |                         |    |    |   |   |   |   |
|         |                        |                      |          |          |        | 16   |            | 16.0000  |                                                               |                         |    |    |   |   |   |   |
| FN0552  | -1.736                 | 7.554                |          |          | 7      | 19   | 7.5124     | 26.0327  | AAL94748.1  Serine racemase                                   |                         |    |    |   |   |   |   |
|         |                        |                      |          |          |        | 24   |            | 24.0000  |                                                               |                         |    |    |   |   |   |   |
| FN0553  | -0.866                 | 13.607               | 8.074e-2 | 1.58e-1  | 85     | 64   | 91.2216    | 87.6890  | AAL94749.1  D-serine dehydratase                              |                         |    |    |   |   |   |   |
|         |                        |                      |          |          | 54     | 214  | 74.2511    | 214.0000 |                                                               |                         |    |    |   |   |   |   |

Show detected proteins only  
 Show all proteins  
 Filter by category:

Proteins found: 1305

Test Cutoff

| Signif | Direction | Applies To   |
|--------|-----------|--------------|
| yes    | +         | ratios, bars |
| no     | n/a       | bars         |
| yes    | -         | ratios, bars |
| yes    | +         | p-, q-Values |
| yes    | -         | p-, q-Values |

Fn Summary Table FnPg vs Fn FnSg vs Fn FnPgSg vs Fn FnPgSg vs FnPg FnSg vs FnPg FnPgSg vs FnSg Fn Coverage

| Protein | FnPgSg vs FnPg         |                      |          |          | Raw    |      | Normalized |           | Description                                                                         | Log <sub>2</sub> Ratios |    |    |   |   |   |   |
|---------|------------------------|----------------------|----------|----------|--------|------|------------|-----------|-------------------------------------------------------------------------------------|-------------------------|----|----|---|---|---|---|
|         | Log <sub>2</sub> Ratio | Log <sub>2</sub> Sum | q-Value  | p-Value  | FnPgSg | FnPg | FnPgSg     | FnPg      |                                                                                     | -6                      | -4 | -2 | 0 | 2 | 4 | 6 |
| FN0554  | -2.399                 | 5.773                |          |          | 3      | 8    | 3.2196     | 10.9611   | AAL94750.1  D-serine permease                                                       |                         |    |    |   |   |   |   |
|         |                        |                      |          |          |        |      |            | 23        |                                                                                     | 23.0000                 |    |    |   |   |   |   |
| FN0556  | -1.821                 | 10.218               | 6.762e-2 | 1.232e-1 | 15     | 75   | 16.0979    | 102.7605  | AAL94752.1  unknown                                                                 |                         |    |    |   |   |   |   |
|         |                        |                      |          |          | 15     | 27   | 20.6253    | 27.0000   |                                                                                     |                         |    |    |   |   |   |   |
| FN0557  | -2.576                 | 11.851               | 3.589e-2 | 4.95e-2  | 31     | 59   | 33.2691    | 80.8383   | AAL94753.1  unknown                                                                 |                         |    |    |   |   |   |   |
|         |                        |                      |          |          | 12     | 216  | 16.5002    | 216.0000  |                                                                                     |                         |    |    |   |   |   |   |
| FN0558  | -3.288                 | 13.072               |          |          | 31     |      | 33.2691    |           | AAL94754.1  TraT complement resistance protein precursor                            |                         |    |    |   |   |   |   |
|         |                        |                      |          |          | 19     | 290  | 26.1254    | 290.0000  |                                                                                     |                         |    |    |   |   |   |   |
| FN0559  | -0.786                 | 14.769               | 6.733e-2 | 1.224e-1 | 100    | 105  | 107.3196   | 143.8647  | AAL94755.1  Phosphoglucomutase                                                      |                         |    |    |   |   |   |   |
|         |                        |                      |          |          | 107    | 295  | 147.1272   | 295.0000  |                                                                                     |                         |    |    |   |   |   |   |
| FN0561  | -0.726                 | 10.269               | 1.729e-2 | 1.737e-2 | 24     | 28   | 25.7567    | 38.3639   | AAL94757.1  Proline synthetase associated protein                                   |                         |    |    |   |   |   |   |
|         |                        |                      |          |          | 21     | 52   | 28.8754    | 52.0000   |                                                                                     |                         |    |    |   |   |   |   |
| FN0562  | 0.599                  | 14.030               | 1.887e-2 | 1.958e-2 | 157    | 60   | 168.4917   | 82.2084   | AAL94758.1  Hypothetical cytosolic protein                                          |                         |    |    |   |   |   |   |
|         |                        |                      |          |          | 109    | 128  | 149.8773   | 128.0000  |                                                                                     |                         |    |    |   |   |   |   |
| FN0563  | 0.162                  | 6.285                | 2.466e-1 | 7.849e-1 | 11     | 10   | 11.8052    | 13.7014   | AAL94759.1  putative tRNA (5-methylaminomethyl-2-thiouridylate) - methyltransferase |                         |    |    |   |   |   |   |
|         |                        |                      |          |          | 5      | 3    | 6.8751     | 3.0000    |                                                                                     |                         |    |    |   |   |   |   |
| FN0574  |                        |                      |          |          | 4      |      | 4.2928     |           | AAL94770.1  Hypothetical cytosolic protein                                          |                         |    |    |   |   |   |   |
|         |                        |                      |          |          |        |      |            |           |                                                                                     |                         |    |    |   |   |   |   |
| FN0576  | -0.250                 | 10.474               | 1.173e-1 | 2.812e-1 | 26     | 25   | 27.9031    | 34.2535   | AAL94772.1  hypothetical protein                                                    |                         |    |    |   |   |   |   |
|         |                        |                      |          |          | 30     | 48   | 41.2506    | 48.0000   |                                                                                     |                         |    |    |   |   |   |   |
| FN0577  |                        |                      |          |          |        |      |            |           | AAL94773.1  Hypothetical protein                                                    |                         |    |    |   |   |   |   |
|         |                        |                      |          |          |        |      |            | 11        |                                                                                     | 11.0000                 |    |    |   |   |   |   |
| FN0579  | -1.593                 | 18.792               | 2.565e-2 | 3.024e-2 | 350    | 1109 | 375.6185   | 1519.4851 | AAL94775.1  Hypothetical cytosolic protein                                          |                         |    |    |   |   |   |   |
|         |                        |                      |          |          | 291    | 821  | 400.1310   | 821.0000  |                                                                                     |                         |    |    |   |   |   |   |
| FN0580  |                        |                      |          |          |        |      |            |           | AAL94776.1  Penicillin-binding protein                                              |                         |    |    |   |   |   |   |
|         |                        |                      |          |          |        |      |            | 4         |                                                                                     | 4.0000                  |    |    |   |   |   |   |
| FN0581  | -0.219                 | 5.781                |          |          |        |      |            |           | AAL94777.1  Lipoprotein releasing system transmembrane protein l0E                  |                         |    |    |   |   |   |   |
|         |                        |                      |          |          | 5      | 8    | 6.8751     | 8.0000    |                                                                                     |                         |    |    |   |   |   |   |
| FN0582  | 0.210                  | 8.550                |          |          | 26     |      | 27.9031    |           | AAL94778.1  Lipoprotein releasing system ATP-binding protein l0D                    |                         |    |    |   |   |   |   |
|         |                        |                      |          |          | 10     | 18   | 13.7502    | 18.0000   |                                                                                     |                         |    |    |   |   |   |   |
| FN0583  |                        |                      |          |          |        |      |            |           | AAL94779.1  Hypothetical Exported Protein                                           |                         |    |    |   |   |   |   |
|         |                        |                      |          |          |        |      |            | 21        |                                                                                     | 21.0000                 |    |    |   |   |   |   |

Show detected proteins only  
 Show all proteins  
 Filter by category:

Proteins found: 1305

Enter (or paste) list of ORFs

Find ORFs

Test Cutoff

q-Value

p-Value

| Signif | Direction | Applies To   |
|--------|-----------|--------------|
| yes    | +         | ratios, bars |
| no     | n/a       | bars         |
| yes    | -         | ratios, bars |
| yes    | +         | p-, q-Values |
| yes    | -         | p-, q-Values |

Dot Plots  Dot Plots

| Protein | FnPgSg vs FnPg         |                      |          |          | Raw    |      | Normalized |          | Description                                                                        | Log <sub>2</sub> Ratios |    |    |   |   |   |   |
|---------|------------------------|----------------------|----------|----------|--------|------|------------|----------|------------------------------------------------------------------------------------|-------------------------|----|----|---|---|---|---|
|         | Log <sub>2</sub> Ratio | Log <sub>2</sub> Sum | q-Value  | p-Value  | FnPgSg | FnPg | FnPgSg     | FnPg     |                                                                                    |                         |    |    |   |   |   |   |
|         |                        |                      |          |          |        |      |            |          |                                                                                    | -6                      | -4 | -2 | 0 | 2 | 4 | 6 |
| FN0585  | -1.944                 | 6.148                |          |          | 4      | 19   | 4.2928     | 26.0327  | AAL94781.1   Two-component response regulator czcR                                 |                         |    |    |   |   |   |   |
|         |                        |                      |          |          |        |      |            | 7        |                                                                                    | 7.0000                  |    |    |   |   |   |   |
| FN0586  | -1.599                 | 5.802                |          |          | 4      |      | 4.2928     |          | AAL94782.1   Two-component sensor kinase czcS                                      |                         |    |    |   |   |   |   |
|         |                        |                      |          |          |        |      |            | 13       |                                                                                    | 13.0000                 |    |    |   |   |   |   |
| FN0590  | -2.019                 | 7.489                | 6.446e-2 | 1.154e-1 | 6      | 8    | 6.4392     | 10.9611  | AAL94786.1   N-acyl-L-amino acid amidohydrolase                                    |                         |    |    |   |   |   |   |
|         |                        |                      |          |          | 5      | 43   | 6.8751     | 43.0000  |                                                                                    |                         |    |    |   |   |   |   |
| FN0592  | -0.173                 | 12.083               | 1.066e-1 | 2.44e-1  | 49     | 51   | 52.5866    | 69.8771  | AAL94788.1   ATP-dependent DNA helicase pcrA                                       |                         |    |    |   |   |   |   |
|         |                        |                      |          |          | 52     | 70   | 71.5011    | 70.0000  |                                                                                    |                         |    |    |   |   |   |   |
| FN0593  | 0.047                  | 11.121               | 1.803e-1 | 5.145e-1 | 42     | 32   | 45.0742    | 43.8445  | AAL94789.1   UDP-3-O-[3-hydroxymyristoyl] N-acetylglucosamine deacetylase          |                         |    |    |   |   |   |   |
|         |                        |                      |          |          | 37     | 49   | 50.8758    | 49.0000  |                                                                                    |                         |    |    |   |   |   |   |
| FN0594  | -4.406                 | 10.610               |          |          | 8      |      | 8.5856     |          | AAL94790.1   (3R)-hydroxymyristoyl-[acyl carrier protein] dehydratase              |                         |    |    |   |   |   |   |
|         |                        |                      |          |          |        |      |            | 182      |                                                                                    | 182.0000                |    |    |   |   |   |   |
| FN0595  | 0.403                  | 9.913                |          |          | 14     |      | 15.0247    |          | AAL94791.1   Acyl-[acyl-carrier-protein]-UDP-N-acetylglucosamine O-acyltransferase |                         |    |    |   |   |   |   |
|         |                        |                      |          |          | 41     | 27   | 56.3758    | 27.0000  |                                                                                    |                         |    |    |   |   |   |   |
| FN0596  | -0.441                 | 7.815                |          |          | 12     | 8    | 12.8783    | 10.9611  | AAL94792.1   Hypothetical protein                                                  |                         |    |    |   |   |   |   |
|         |                        |                      |          |          |        |      |            | 24       |                                                                                    | 24.0000                 |    |    |   |   |   |   |
| FN0597  | -1.184                 | 9.156                | 2.985e-3 | 1.217e-3 | 18     | 27   | 19.3175    | 36.9938  | AAL94793.1   Lipid-A-disaccharide synthase                                         |                         |    |    |   |   |   |   |
|         |                        |                      |          |          | 9      | 35   | 12.3752    | 35.0000  |                                                                                    |                         |    |    |   |   |   |   |
| FN0598  | 0.864                  | 8.436                | 1.403e-2 | 1.267e-2 | 25     | 7    | 26.8299    | 9.5910   | AAL94794.1   Phospholipid-lipopolysaccharide ABC transporter                       |                         |    |    |   |   |   |   |
|         |                        |                      |          |          | 17     | 18   | 23.3754    | 18.0000  |                                                                                    |                         |    |    |   |   |   |   |
| FN0600  | 0.296                  | 12.609               | 2.003e-1 | 5.977e-1 | 94     | 18   | 100.8804   | 24.6625  | AAL94796.1   Hypothetical protein                                                  |                         |    |    |   |   |   |   |
|         |                        |                      |          |          | 54     | 118  | 74.2511    | 118.0000 |                                                                                    |                         |    |    |   |   |   |   |
| FN0602  | -0.033                 | 13.917               | 2.575e-1 | 8.315e-1 | 110    | 107  | 118.0515   | 146.6050 | AAL94798.1   Hypothetical protein                                                  |                         |    |    |   |   |   |   |
|         |                        |                      |          |          | 93     | 105  | 127.8769   | 105.0000 |                                                                                    |                         |    |    |   |   |   |   |
| FN0603  |                        |                      |          |          |        |      |            |          | AAL94799.1   Transcriptional regulatory protein, LYSR family                       |                         |    |    |   |   |   |   |
|         |                        |                      |          |          |        | 8    | 8.0000     |          |                                                                                    |                         |    |    |   |   |   |   |
| FN0605  |                        |                      |          |          |        |      |            |          | AAL94801.1   Aspartate aminotransferase                                            |                         |    |    |   |   |   |   |
|         |                        |                      |          |          | 5      |      | 6.8751     |          |                                                                                    |                         |    |    |   |   |   |   |
| FN0608  | -1.241                 | 12.447               | 3.975e-2 | 5.704e-2 | 47     | 56   | 50.4402    | 76.7278  | AAL94804.1   Exoribonuclease II                                                    |                         |    |    |   |   |   |   |
|         |                        |                      |          |          | 34     | 153  | 46.7507    | 153.0000 |                                                                                    |                         |    |    |   |   |   |   |
| FN0609  |                        |                      |          |          |        |      |            |          | AAL94805.1   Small protein B                                                       |                         |    |    |   |   |   |   |
|         |                        |                      |          |          |        | 6    | 6.0000     |          |                                                                                    |                         |    |    |   |   |   |   |

Show detected proteins only  
 Show all proteins  
 Filter by category:

Proteins found:  
1305

Enter (or paste) list of ORFs

Find ORFs

**Test**      **Cutoff**

q-Value      .005

p-Value

| Signif | Direction | Applies To   |
|--------|-----------|--------------|
| yes    | +         | ratios, bars |
| no     | n/a       | bars         |
| yes    | -         | ratios, bars |
| yes    | +         | p-, q-Values |
| yes    | -         | p-, q-Values |

Dot Plots Dot Plots

Fn Summary Table FnPg vs Fn FnSg vs Fn FnPgSg vs Fn FnPgSg vs FnPg FnSg vs FnPg FnPgSg vs FnSg Fn Coverage

| Protein | FnPgSg vs FnPg         |                      |          |          | Raw    |      | Normalized |          | Description                                                                  | Log <sub>2</sub> Ratios |    |    |   |   |   |   |
|---------|------------------------|----------------------|----------|----------|--------|------|------------|----------|------------------------------------------------------------------------------|-------------------------|----|----|---|---|---|---|
|         | Log <sub>2</sub> Ratio | Log <sub>2</sub> Sum | q-Value  | p-Value  | FnPgSg | FnPg | FnPgSg     | FnPg     |                                                                              | -6                      | -4 | -2 | 0 | 2 | 4 | 6 |
| FN0610  | -0.157                 | 15.454               | 2.281e-1 | 7.085e-1 | 201    | 93   | 215.7123   | 127.4230 | AAL94806.1  unknown                                                          |                         |    |    |   |   |   |   |
|         |                        |                      |          |          | 135    | 320  | 185.6278   | 320.0000 |                                                                              |                         |    |    |   |   |   |   |
| FN0611  | -0.502                 | 18.161               | 8.272e-3 | 5.665e-3 | 471    | 461  | 505.4752   | 631.6345 | AAL94807.1  Threonyl-tRNA synthetase                                         |                         |    |    |   |   |   |   |
|         |                        |                      |          |          | 294    | 657  | 404.2561   | 657.0000 |                                                                              |                         |    |    |   |   |   |   |
| FN0612  | 1.495                  | 12.095               | 3.393e-2 | 4.572e-2 | 66     | 13   | 70.8309    | 17.8118  | AAL94808.1  Hypothetical protein                                             |                         |    |    |   |   |   |   |
|         |                        |                      |          |          | 110    | 61   | 151.2523   | 61.0000  |                                                                              |                         |    |    |   |   |   |   |
| FN0615  |                        |                      |          |          |        |      |            |          | AAL94811.1  Export ABC transporter                                           |                         |    |    |   |   |   |   |
|         |                        |                      |          |          |        | 3    |            | 4.1104   |                                                                              |                         |    |    |   |   |   |   |
| FN0616  | 2.583                  | 8.198                |          |          | 50     |      | 53.6598    |          | AAL94812.1  Hypothetical protein                                             |                         |    |    |   |   |   |   |
|         |                        |                      |          |          | 22     | 7    | 30.2505    | 7.0000   |                                                                              |                         |    |    |   |   |   |   |
| FN0617  | -0.985                 | 15.912               | 8.778e-2 | 1.788e-1 | 170    | 380  | 182.4433   | 520.6531 | AAL94813.1  DNA polymerase III, beta chain                                   |                         |    |    |   |   |   |   |
|         |                        |                      |          |          | 124    | 178  | 170.5026   | 178.0000 |                                                                              |                         |    |    |   |   |   |   |
| FN0618  | -0.609                 | 13.016               | 1.303e-1 | 3.288e-1 | 72     | 40   | 77.2701    | 54.8056  | AAL94814.1  Spermidine/putrescine-binding protein                            |                         |    |    |   |   |   |   |
|         |                        |                      |          |          | 51     | 170  | 70.1261    | 170.0000 |                                                                              |                         |    |    |   |   |   |   |
| FN0619  | 0.192                  | 7.646                |          |          |        | 4    |            | 5.4806   | AAL94815.1  Small-conductance mechanosensitive channel                       |                         |    |    |   |   |   |   |
|         |                        |                      |          |          | 11     | 21   | 15.1252    | 21.0000  |                                                                              |                         |    |    |   |   |   |   |
| FN0621  | 0.106                  | 11.642               | 2.437e-1 | 7.723e-1 | 67     | 54   | 71.9041    | 73.9876  | AAL94817.1  4-hydroxybutyrate coenzyme A transferase                         |                         |    |    |   |   |   |   |
|         |                        |                      |          |          | 33     | 35   | 45.3757    | 35.0000  |                                                                              |                         |    |    |   |   |   |   |
| FN0622  | -3.105                 | 7.252                | 4.485e-2 | 6.767e-2 | 4      | 12   | 4.2928     | 16.4417  | AAL94818.1  8-oxoguanine DNA glycosylase                                     |                         |    |    |   |   |   |   |
|         |                        |                      |          |          | 3      | 56   | 4.1251     | 56.0000  |                                                                              |                         |    |    |   |   |   |   |
| FN0625  | 1.071                  | 9.793                |          |          | 51     | 15   | 54.7330    | 20.5521  | AAL94821.1  Aspartate aminotransferase                                       |                         |    |    |   |   |   |   |
|         |                        |                      |          |          | 23     |      | 31.6255    |          |                                                                              |                         |    |    |   |   |   |   |
| FN0627  | 1.648                  | 14.798               | 6.612e-3 | 3.834e-3 | 284    | 37   | 304.7876   | 50.6952  | AAL94823.1  Glucosamine--fructose-6-phosphate aminotransferase (isomerizing) |                         |    |    |   |   |   |   |
|         |                        |                      |          |          | 213    | 140  | 292.8794   | 140.0000 |                                                                              |                         |    |    |   |   |   |   |
| FN0628  |                        |                      |          |          | 20     |      | 21.4639    |          | AAL94824.1  Glucosamine--fructose-6-phosphate aminotransferase (isomerizing) |                         |    |    |   |   |   |   |
|         |                        |                      |          |          | 14     |      | 19.2503    |          |                                                                              |                         |    |    |   |   |   |   |
| FN0629  | 1.353                  | 9.353                |          |          | 39     |      | 41.8546    |          | AAL94825.1  PTS system, IID component                                        |                         |    |    |   |   |   |   |
|         |                        |                      |          |          | 29     | 16   | 39.8756    | 16.0000  |                                                                              |                         |    |    |   |   |   |   |
| FN0630  |                        |                      |          |          | 34     |      | 36.4887    |          | AAL94826.1  PTS system, IIC component                                        |                         |    |    |   |   |   |   |
|         |                        |                      |          |          | 11     |      | 15.1252    |          |                                                                              |                         |    |    |   |   |   |   |
| FN0631  | -0.378                 | 7.797                |          |          | 9      |      | 9.6588     |          | AAL94827.1  PTS system, IIB component                                        |                         |    |    |   |   |   |   |
|         |                        |                      |          |          | 12     | 17   | 16.5002    | 17.0000  |                                                                              |                         |    |    |   |   |   |   |

Show detected proteins only  
 Show all proteins  
 Filter by category:

Proteins found: 1305

Enter (or paste) list of ORFs

Find ORFs

Test Cutoff

q-Value

p-Value

.005

| Signif | Direction | Applies To   |
|--------|-----------|--------------|
| yes    | +         | ratios, bars |
| no     | n/a       | bars         |
| yes    | -         | ratios, bars |
| yes    | +         | p-, q-Values |
| yes    | -         | p-, q-Values |

Dot Plots Dot Plots



Fn Summary Table FnPg vs Fn FnSg vs Fn FnPgSg vs Fn FnPgSg vs FnPg FnSg vs FnPg FnPgSg vs FnSg Fn Coverage

| Protein | FnPgSg vs FnPg         |                      |          |          | Raw    |      |           |           | Normalized                                                      |      |        |      | Description | Log <sub>2</sub> Ratios |    |    |   |   |   |   |
|---------|------------------------|----------------------|----------|----------|--------|------|-----------|-----------|-----------------------------------------------------------------|------|--------|------|-------------|-------------------------|----|----|---|---|---|---|
|         | Log <sub>2</sub> Ratio | Log <sub>2</sub> Sum | q-Value  | p-Value  | FnPgSg | FnPg | FnPgSg    | FnPg      | FnPgSg                                                          | FnPg | FnPgSg | FnPg |             | -6                      | -4 | -2 | 0 | 2 | 4 | 6 |
| FN0633  | -1.077                 | 6.737                |          |          | 3      |      | 3.2196    |           |                                                                 |      |        |      |             |                         |    |    |   |   |   |   |
|         |                        |                      |          |          | 8      | 15   | 11.0002   | 15.0000   | AAL94829.1   Replication protein                                |      |        |      |             |                         |    |    |   |   |   |   |
| FN0634  | 0.016                  | 13.546               | 2.897e-1 | 9.78e-1  | 105    | 131  | 112.6856  | 179.4883  | AAL94830.1   GTP-binding protein TypA/BipA                      |      |        |      |             |                         |    |    |   |   |   |   |
|         |                        |                      |          |          | 78     | 38   | 107.2516  | 38.0000   |                                                                 |      |        |      |             |                         |    |    |   |   |   |   |
| FN0637  |                        |                      |          |          | 4      |      | 4.2928    |           | AAL94833.1   Hypothetical exported 24-amino acid repeat protein |      |        |      |             |                         |    |    |   |   |   |   |
|         |                        |                      |          |          | 5      |      | 6.8751    |           |                                                                 |      |        |      |             |                         |    |    |   |   |   |   |
| FN0643  | -1.016                 | 8.785                | 4.744e-2 | 7.347e-2 | 16     | 29   | 17.1711   | 39.7341   | AAL94839.1   hypothetical DNA-binding protein                   |      |        |      |             |                         |    |    |   |   |   |   |
|         |                        |                      |          |          | 9      | 20   | 12.3752   | 20.0000   |                                                                 |      |        |      |             |                         |    |    |   |   |   |   |
| FN0644  | -0.395                 | 10.952               | 9.26e-2  | 1.941e-1 | 48     | 38   | 51.5134   | 52.0653   | AAL94840.1   Uroporphyrin-III C-methyltransferase               |      |        |      |             |                         |    |    |   |   |   |   |
|         |                        |                      |          |          | 19     | 50   | 26.1254   | 50.0000   |                                                                 |      |        |      |             |                         |    |    |   |   |   |   |
| FN0645  | -0.136                 | 5.670                | 2.437e-1 | 7.726e-1 | 5      | 8    | 5.3660    | 10.9611   | AAL94841.1   Porphobilinogen deaminase                          |      |        |      |             |                         |    |    |   |   |   |   |
|         |                        |                      |          |          | 6      | 4    | 8.2501    | 4.0000    |                                                                 |      |        |      |             |                         |    |    |   |   |   |   |
| FN0646  |                        |                      |          |          | 11     |      | 11.8052   |           | AAL94842.1   Glutamyl-tRNA reductase                            |      |        |      |             |                         |    |    |   |   |   |   |
|         |                        |                      |          |          |        |      |           |           |                                                                 |      |        |      |             |                         |    |    |   |   |   |   |
| FN0647  |                        |                      |          |          | 5      |      | 5.3660    |           | AAL94843.1   transcriptional regulator                          |      |        |      |             |                         |    |    |   |   |   |   |
|         |                        |                      |          |          |        |      |           |           |                                                                 |      |        |      |             |                         |    |    |   |   |   |   |
| FN0649  |                        |                      |          |          |        | 6    |           | 8.2208    | AAL94845.1   Exoenzymes regulatory protein aepA precursor       |      |        |      |             |                         |    |    |   |   |   |   |
|         |                        |                      |          |          |        |      |           |           |                                                                 |      |        |      |             |                         |    |    |   |   |   |   |
| FN0652  | -1.204                 | 23.474               | 5.014e-2 | 7.989e-2 | 2302   | 2352 | 2470.4966 | 3222.5689 | AAL94848.1   Glyceraldehyde 3-phosphate dehydrogenase           |      |        |      |             |                         |    |    |   |   |   |   |
|         |                        |                      |          |          | 1474   | 7137 | 2026.7806 | 7137.0000 |                                                                 |      |        |      |             |                         |    |    |   |   |   |   |
| FN0653  | -1.484                 | 10.535               | 2.845e-2 | 3.52e-2  | 16     | 32   | 17.1711   | 43.8445   | AAL94849.1   unknown                                            |      |        |      |             |                         |    |    |   |   |   |   |
|         |                        |                      |          |          | 21     | 85   | 28.8754   | 85.0000   |                                                                 |      |        |      |             |                         |    |    |   |   |   |   |
| FN0654  | -0.528                 | 18.139               | 5.338e-2 | 8.806e-2 | 366    | 368  | 392.7896  | 504.2115  | AAL94850.1   Phosphoglycerate kinase                            |      |        |      |             |                         |    |    |   |   |   |   |
|         |                        |                      |          |          | 365    | 786  | 501.8826  | 786.0000  |                                                                 |      |        |      |             |                         |    |    |   |   |   |   |
| FN0655  | 2.287                  | 9.206                |          |          | 36     |      | 38.6350   |           | AAL94851.1   unknown                                            |      |        |      |             |                         |    |    |   |   |   |   |
|         |                        |                      |          |          | 50     | 11   | 68.7510   | 11.0000   |                                                                 |      |        |      |             |                         |    |    |   |   |   |   |
| FN0656  |                        |                      |          |          | 33     |      | 35.4155   |           | AAL94852.1   Hypothetical protein                               |      |        |      |             |                         |    |    |   |   |   |   |
|         |                        |                      |          |          | 26     |      | 35.7505   |           |                                                                 |      |        |      |             |                         |    |    |   |   |   |   |
| FN0657  |                        |                      |          |          |        |      |           |           | AAL94853.1   Acetyltransferase                                  |      |        |      |             |                         |    |    |   |   |   |   |
|         |                        |                      |          |          |        | 22   |           | 22.0000   |                                                                 |      |        |      |             |                         |    |    |   |   |   |   |
| FN0658  | 1.414                  | 13.378               | 1.064e-6 | 1.419e-8 | 155    | 47   | 166.3453  | 64.3966   | AAL94854.1   ABC transporter substrate-binding protein          |      |        |      |             |                         |    |    |   |   |   |   |
|         |                        |                      |          |          | 124    | 62   | 170.5026  | 62.0000   |                                                                 |      |        |      |             |                         |    |    |   |   |   |   |

Show detected proteins only  
 Show all proteins  
 Filter by category:

Proteins found: 1305

Test Cutoff

| Signif | Direction | Applies To   |
|--------|-----------|--------------|
| yes    | +         | ratios, bars |
| no     | n/a       | bars         |
| yes    | -         | ratios, bars |
| yes    | +         | p-, q-Values |
| yes    | -         |              |

Fn Summary Table FnPg vs Fn FnSg vs Fn FnPgSg vs Fn FnPgSg vs FnPg FnSg vs FnPg FnPgSg vs FnSg Fn Coverage

| Protein | FnPgSg vs FnPg         |                      |          |          | Raw    |      | Normalized |           | Description                                                         | Log <sub>2</sub> Ratios |    |    |   |   |   |   |
|---------|------------------------|----------------------|----------|----------|--------|------|------------|-----------|---------------------------------------------------------------------|-------------------------|----|----|---|---|---|---|
|         | Log <sub>2</sub> Ratio | Log <sub>2</sub> Sum | q-Value  | p-Value  | FnPgSg | FnPg | FnPgSg     | FnPg      |                                                                     | -6                      | -4 | -2 | 0 | 2 | 4 | 6 |
| FN0660  | -0.340                 | 6.351                | 1.009e-1 | 2.225e-1 | 6      | 9    | 6.4392     | 12.3313   | AAL94856.1  ABC transporter ATP-binding protein                     |                         |    |    |   |   |   |   |
|         |                        |                      |          |          | 7      | 8    | 9.6251     | 8.0000    |                                                                     |                         |    |    |   |   |   |   |
| FN0662  | -0.121                 | 11.303               | 2.691e-1 | 8.829e-1 | 45     | 5    | 48.2938    | 6.8507    | AAL94858.1  Formiminoglutamase                                      |                         |    |    |   |   |   |   |
|         |                        |                      |          |          | 35     | 98   | 48.1257    | 98.0000   |                                                                     |                         |    |    |   |   |   |   |
| FN0664  | 0.742                  | 12.874               | 5.797e-2 | 9.97e-2  | 123    | 73   | 132.0031   | 100.0202  | AAL94860.1  2-nitropropane dioxygenase                              |                         |    |    |   |   |   |   |
|         |                        |                      |          |          | 67     | 34   | 92.1264    | 34.0000   |                                                                     |                         |    |    |   |   |   |   |
| FN0668  | -0.710                 | 7.754                | 1.171e-1 | 2.803e-1 | 15     | 7    | 16.0979    | 9.5910    | AAL94864.1  High-affinity zinc uptake system protein znuA precursor |                         |    |    |   |   |   |   |
|         |                        |                      |          |          | 5      | 28   | 6.8751     | 28.0000   |                                                                     |                         |    |    |   |   |   |   |
| FN0672  | 0.629                  | 6.629                |          |          |        |      |            |           | AAL94868.1  ATPase                                                  |                         |    |    |   |   |   |   |
|         |                        |                      |          |          | 9      | 8    | 12.3752    | 8.0000    |                                                                     |                         |    |    |   |   |   |   |
| FN0675  | -0.340                 | 20.634               | 2.088e-1 | 6.325e-1 | 974    | 331  | 1045.2927  | 453.5163  | AAL94871.1  60 kDa chaperonin GROEL                                 |                         |    |    |   |   |   |   |
|         |                        |                      |          |          | 889    | 2417 | 1222.3934  | 2417.0000 |                                                                     |                         |    |    |   |   |   |   |
| FN0676  | 0.993                  | 11.977               |          |          | 76     |      | 81.5629    |           | AAL94872.1  10 kDa chaperonin GROES                                 |                         |    |    |   |   |   |   |
|         |                        |                      |          |          | 71     | 45   | 97.6265    | 45.0000   |                                                                     |                         |    |    |   |   |   |   |
| FN0677  | -1.397                 | 10.579               | 3.454e-2 | 4.698e-2 | 18     | 62   | 19.3175    | 84.9487   | AAL94873.1  Hypothetical protein                                    |                         |    |    |   |   |   |   |
|         |                        |                      |          |          | 21     | 42   | 28.8754    | 42.0000   |                                                                     |                         |    |    |   |   |   |   |
| FN0678  | 1.217                  | 10.191               | 3.294e-2 | 4.369e-2 | 51     | 5    | 54.7330    | 6.8507    | AAL94874.1  Ser/Thr protein kinase                                  |                         |    |    |   |   |   |   |
|         |                        |                      |          |          | 36     | 38   | 49.5007    | 38.0000   |                                                                     |                         |    |    |   |   |   |   |
| FN0679  | -1.990                 | 6.079                |          |          |        | 21   |            | 28.7729   | AAL94875.1  GTPase                                                  |                         |    |    |   |   |   |   |
|         |                        |                      |          |          | 3      | 4    | 4.1251     | 4.0000    |                                                                     |                         |    |    |   |   |   |   |
| FN0680  | -0.422                 | 5.578                |          |          | 6      |      | 6.4392     |           | AAL94876.1  Ribulose-phosphate 3-epimerase                          |                         |    |    |   |   |   |   |
|         |                        |                      |          |          | 4      | 8    | 5.5001     | 8.0000    |                                                                     |                         |    |    |   |   |   |   |
| FN0681  | -0.701                 | 15.810               | 2.402e-2 | 2.75e-2  | 176    | 260  | 188.8825   | 356.2364  | AAL94877.1  Transcriptional regulator, MarR family                  |                         |    |    |   |   |   |   |
|         |                        |                      |          |          | 136    | 255  | 187.0028   | 255.0000  |                                                                     |                         |    |    |   |   |   |   |
| FN0682  | -0.111                 | 8.535                | 2.443e-1 | 7.748e-1 | 23     | 19   | 24.6835    | 26.0327   | AAL94878.1  Fibronectin-binding protein-like protein A              |                         |    |    |   |   |   |   |
|         |                        |                      |          |          | 9      | 14   | 12.3752    | 14.0000   |                                                                     |                         |    |    |   |   |   |   |
| FN0684  | -2.867                 | 6.240                |          |          | 3      | 8    | 3.2196     | 10.9611   | AAL94880.1  Prismane protein                                        |                         |    |    |   |   |   |   |
|         |                        |                      |          |          |        | 36   |            | 36.0000   |                                                                     |                         |    |    |   |   |   |   |
| FN0685  | -3.531                 | 9.978                |          |          | 11     |      | 11.8052    |           | AAL94881.1  Sodium/pantothenate symporter                           |                         |    |    |   |   |   |   |
|         |                        |                      |          |          | 5      | 108  | 6.8751     | 108.0000  |                                                                     |                         |    |    |   |   |   |   |
| FN0688  | -1.621                 | 7.994                |          |          | 8      |      | 8.5856     |           | AAL94884.1  Hypothetical protein                                    |                         |    |    |   |   |   |   |
|         |                        |                      |          |          | 7      | 28   | 9.6251     | 28.0000   |                                                                     |                         |    |    |   |   |   |   |

Show detected proteins only  
 Show all proteins  
 Filter by category:

Proteins found: 1305

Test Cutoff

| Signif      | Direction | Applies To |
|-------------|-----------|------------|
| red         | yes       | +          |
| yellow      | no        | n/a        |
| green       | yes       | -          |
| pink        | yes       | +          |
| light green | yes       | -          |

Applies To: ratios, bars; bars; ratios, bars; p-, q-Values

Fn Summary Table FnPg vs Fn FnSg vs Fn FnPgSg vs Fn FnPgSg vs FnPg FnSg vs FnPg FnPgSg vs FnSg Fn Coverage

| Protein | FnPgSg vs FnPg         |                      |          |          | Raw    |      | Normalized |          | Description                                      | Log <sub>2</sub> Ratios |    |    |   |   |   |   |
|---------|------------------------|----------------------|----------|----------|--------|------|------------|----------|--------------------------------------------------|-------------------------|----|----|---|---|---|---|
|         | Log <sub>2</sub> Ratio | Log <sub>2</sub> Sum | q-Value  | p-Value  | FnPgSg | FnPg | FnPgSg     | FnPg     |                                                  | -6                      | -4 | -2 | 0 | 2 | 4 | 6 |
| FN0689  | 0.123                  | 13.758               | 2.44e-1  | 7.739e-1 | 120    | 42   | 128.7835   | 57.5459  | AAL94885.1  Hypothetical protein                 |                         |    |    |   |   |   |   |
|         |                        |                      |          |          | 85     | 168  | 116.8768   | 168.0000 |                                                  |                         |    |    |   |   |   |   |
| FN0692  |                        |                      |          |          |        |      |            |          | AAL94888.1  Nitrogen regulation protein NIFR3    |                         |    |    |   |   |   |   |
|         |                        |                      |          |          | 3      |      | 4.1251     |          |                                                  |                         |    |    |   |   |   |   |
| FN0693  | -0.800                 | 7.923                |          |          | 11     | 15   | 11.8052    | 20.5521  | AAL94889.1  DNA mismatch repair protein mutS     |                         |    |    |   |   |   |   |
|         |                        |                      |          |          |        |      |            |          |                                                  |                         |    |    |   |   |   |   |
| FN0694  | 0.324                  | 10.894               | 2.604e-2 | 3.092e-2 | 41     | 27   | 44.0010    | 36.9938  | AAL94890.1  S-layer protein                      |                         |    |    |   |   |   |   |
|         |                        |                      |          |          | 39     | 41   | 53.6258    | 41.0000  |                                                  |                         |    |    |   |   |   |   |
| FN0695  | -0.077                 | 9.403                | 2.599e-1 | 8.421e-1 | 28     | 12   | 30.0495    | 16.4417  | AAL94891.1  ABC transporter ATP-binding protein  |                         |    |    |   |   |   |   |
|         |                        |                      |          |          | 15     | 37   | 20.6253    | 37.0000  |                                                  |                         |    |    |   |   |   |   |
| FN0697  | 0.610                  | 14.744               | 8.259e-3 | 5.648e-3 | 202    | 114  | 216.7855   | 156.1959 | AAL94893.1  Alanyl-tRNA synthetase               |                         |    |    |   |   |   |   |
|         |                        |                      |          |          | 140    | 112  | 192.5029   | 112.0000 |                                                  |                         |    |    |   |   |   |   |
| FN0699  | 1.455                  | 11.509               | 6.894e-3 | 4.104e-3 | 82     | 33   | 88.0021    | 45.2146  | AAL94895.1  Protein translocase subunit secD     |                         |    |    |   |   |   |   |
|         |                        |                      |          |          | 66     | 20   | 90.7514    | 20.0000  |                                                  |                         |    |    |   |   |   |   |
| FN0700  | 0.847                  | 9.046                | 2.532e-2 | 2.968e-2 | 28     | 17   | 30.0495    | 23.2924  | AAL94896.1  Protein translocase subunit secF     |                         |    |    |   |   |   |   |
|         |                        |                      |          |          | 23     | 11   | 31.6255    | 11.0000  |                                                  |                         |    |    |   |   |   |   |
| FN0701  | 0.082                  | 14.930               | 7.371e-2 | 1.388e-1 | 176    | 120  | 188.8825   | 164.4168 | AAL94897.1  Methyltransferase                    |                         |    |    |   |   |   |   |
|         |                        |                      |          |          | 127    | 179  | 174.6276   | 179.0000 |                                                  |                         |    |    |   |   |   |   |
| FN0705  | 0.020                  | 12.428               | 2.809e-1 | 9.364e-1 | 65     | 39   | 69.7577    | 53.4355  | AAL94901.1  DNA polymerase I                     |                         |    |    |   |   |   |   |
|         |                        |                      |          |          | 58     | 94   | 79.7512    | 94.0000  |                                                  |                         |    |    |   |   |   |   |
| FN0706  |                        |                      |          |          | 6      |      | 6.4392     |          | AAL94902.1  Hypothetical cytosolic protein       |                         |    |    |   |   |   |   |
|         |                        |                      |          |          |        |      |            |          |                                                  |                         |    |    |   |   |   |   |
| FN0707  | -0.572                 | 6.849                | 1.271e-1 | 3.164e-1 | 10     | 14   | 10.7320    | 19.1820  | AAL94903.1  Riboflavin kinase                    |                         |    |    |   |   |   |   |
|         |                        |                      |          |          | 5      | 7    | 6.8751     | 7.0000   |                                                  |                         |    |    |   |   |   |   |
| FN0710  | -0.314                 | 11.337               | 5.238e-2 | 8.549e-2 | 44     | 47   | 47.2206    | 64.3966  | AAL94906.1  Hypothetical protein                 |                         |    |    |   |   |   |   |
|         |                        |                      |          |          | 32     | 49   | 44.0007    | 49.0000  |                                                  |                         |    |    |   |   |   |   |
| FN0711  | -0.854                 | 7.321                |          |          | 6      |      | 6.4392     |          | AAL94907.1  Phosphopantothenate--cysteine ligase |                         |    |    |   |   |   |   |
|         |                        |                      |          |          | 9      | 17   | 12.3752    | 17.0000  |                                                  |                         |    |    |   |   |   |   |
| FN0714  |                        |                      |          |          |        | 7    |            | 9.5910   | AAL94910.1  NADH oxidase                         |                         |    |    |   |   |   |   |
|         |                        |                      |          |          |        | 7    |            | 7.0000   |                                                  |                         |    |    |   |   |   |   |
| FN0715  | 0.717                  | 15.170               | 8.524e-2 | 1.711e-1 | 264    | 177  | 283.3237   | 242.5148 | AAL94911.1  Hypothetical protein                 |                         |    |    |   |   |   |   |
|         |                        |                      |          |          | 152    | 57   | 209.0032   | 57.0000  |                                                  |                         |    |    |   |   |   |   |

Show detected proteins only  
 Show all proteins  
 Filter by category:

Proteins found:  
1305

Test Cutoff

| Signif | Direction | Applies To   |
|--------|-----------|--------------|
| yes    | +         | ratios, bars |
| no     | n/a       | bars         |
| yes    | -         | ratios, bars |
| yes    | +         | p-, q-Values |
| yes    | -         |              |

Fn Summary Table FnPg vs Fn FnSg vs Fn FnPgSg vs Fn FnPgSg vs FnPg FnSg vs FnPg FnPgSg vs FnSg Fn Coverage

| Protein | FnPgSg vs FnPg         |                      |          |          | Raw    |      | Normalized |          | Description                                                    | Log <sub>2</sub> Ratios |    |    |   |   |   |   |
|---------|------------------------|----------------------|----------|----------|--------|------|------------|----------|----------------------------------------------------------------|-------------------------|----|----|---|---|---|---|
|         | Log <sub>2</sub> Ratio | Log <sub>2</sub> Sum | q-Value  | p-Value  | FnPgSg | FnPg | FnPgSg     | FnPg     |                                                                | -6                      | -4 | -2 | 0 | 2 | 4 | 6 |
| FN0716  | -0.331                 | 10.001               | 1.889e-1 | 5.491e-1 | 25     | 40   | 26.8299    | 54.8056  | AAL94912.1  hypothetical protein                               |                         |    |    |   |   |   |   |
|         |                        |                      |          |          | 22     | 17   | 30.2505    | 17.0000  |                                                                |                         |    |    |   |   |   |   |
| FN0717  |                        |                      |          |          | 5      |      | 5.3660     |          | AAL94913.1  Ribosomal small subunit pseudouridine synthase A   |                         |    |    |   |   |   |   |
|         |                        |                      |          |          |        |      |            |          |                                                                |                         |    |    |   |   |   |   |
| FN0720  | -0.610                 | 11.783               | 2.682e-2 | 3.226e-2 | 46     | 45   | 49.3670    | 61.6563  | AAL94916.1  Protein Translation Elongation Factor P (EF-P)     |                         |    |    |   |   |   |   |
|         |                        |                      |          |          | 34     | 85   | 46.7507    | 85.0000  |                                                                |                         |    |    |   |   |   |   |
| FN0721  | 1.392                  | 9.191                | 9.474e-3 | 6.935e-3 | 32     | 5    | 34.3423    | 6.8507   | AAL94917.1  Hypothetical protein                               |                         |    |    |   |   |   |   |
|         |                        |                      |          |          | 32     | 23   | 44.0007    | 23.0000  |                                                                |                         |    |    |   |   |   |   |
| FN0722  | -1.198                 | 5.402                |          |          | 4      | 10   | 4.2928     | 13.7014  | AAL94918.1  WD-repeat family protein                           |                         |    |    |   |   |   |   |
|         |                        |                      |          |          |        | 6    |            | 6.0000   |                                                                |                         |    |    |   |   |   |   |
| FN0723  |                        |                      |          |          |        |      |            |          | AAL94919.1  Hypothetical protein                               |                         |    |    |   |   |   |   |
|         |                        |                      |          |          |        | 4    |            | 4.0000   |                                                                |                         |    |    |   |   |   |   |
| FN0724  | -0.183                 | 11.305               | 9.02e-2  | 1.864e-1 | 38     | 41   | 40.7814    | 56.1757  | AAL94920.1  Flavodoxin                                         |                         |    |    |   |   |   |   |
|         |                        |                      |          |          | 39     | 51   | 53.6258    | 51.0000  |                                                                |                         |    |    |   |   |   |   |
| FN0725  | -0.623                 | 7.485                | 1.33e-1  | 3.392e-1 | 6      | 6    | 6.4392     | 8.2208   | AAL94921.1  Molybdopterin biosynthesis MoeB protein            |                         |    |    |   |   |   |   |
|         |                        |                      |          |          | 11     | 25   | 15.1252    | 25.0000  |                                                                |                         |    |    |   |   |   |   |
| FN0728  | -0.092                 | 10.709               | 2.338e-2 | 2.648e-2 | 38     | 31   | 40.7814    | 42.4743  | AAL94924.1  Hypothetical protein                               |                         |    |    |   |   |   |   |
|         |                        |                      |          |          | 28     | 42   | 38.5006    | 42.0000  |                                                                |                         |    |    |   |   |   |   |
| FN0729  | 0.074                  | 14.548               | 2.571e-1 | 8.297e-1 | 146    | 153  | 156.6866   | 209.6314 | AAL94925.1  Phosphoglycerate mutase                            |                         |    |    |   |   |   |   |
|         |                        |                      |          |          | 117    | 92   | 160.8774   | 92.0000  |                                                                |                         |    |    |   |   |   |   |
| FN0731  | -1.028                 | 9.912                | 6.179e-2 | 1.091e-1 | 20     | 45   | 21.4639    | 61.6563  | AAL94927.1  Hypothetical protein                               |                         |    |    |   |   |   |   |
|         |                        |                      |          |          | 16     | 27   | 22.0003    | 27.0000  |                                                                |                         |    |    |   |   |   |   |
| FN0733  | 1.123                  | 13.570               | 3.011e-3 | 1.233e-3 | 147    | 66   | 157.7598   | 90.4292  | AAL94929.1  Peptidase T                                        |                         |    |    |   |   |   |   |
|         |                        |                      |          |          | 122    | 59   | 167.7525   | 59.0000  |                                                                |                         |    |    |   |   |   |   |
| FN0735  | -0.072                 | 13.661               | 2.727e-1 | 8.987e-1 | 89     | 136  | 95.5144    | 186.3390 | AAL94931.1  Cell surface protein                               |                         |    |    |   |   |   |   |
|         |                        |                      |          |          | 92     | 47   | 126.5019   | 47.0000  |                                                                |                         |    |    |   |   |   |   |
| FN0736  | 0.349                  | 5.716                | 1.385e-1 | 3.605e-1 | 5      | 5    | 5.3660     | 6.8507   | AAL94932.1  Methyltransferase                                  |                         |    |    |   |   |   |   |
|         |                        |                      |          |          | 8      | 6    | 11.0002    | 6.0000   |                                                                |                         |    |    |   |   |   |   |
| FN0737  | -0.908                 | 8.707                |          |          | 15     |      | 16.0979    |          | AAL94933.1  Hypothetical protein                               |                         |    |    |   |   |   |   |
|         |                        |                      |          |          | 10     | 28   | 13.7502    | 28.0000  |                                                                |                         |    |    |   |   |   |   |
| FN0738  | -0.894                 | 9.757                | 9.526e-3 | 6.993e-3 | 21     | 33   | 22.5371    | 45.2146  | AAL94934.1  Hypothetical exported 24-amino acid repeat protein |                         |    |    |   |   |   |   |
|         |                        |                      |          |          | 15     | 35   | 20.6253    | 35.0000  |                                                                |                         |    |    |   |   |   |   |

Show detected proteins only  
 Show all proteins  
 Filter by category:

Proteins found: 1305

Enter (or paste) list of ORFs

Find ORFs

Test Cutoff

q-Value p-Value

.005

| Signif | Direction | Applies To   |
|--------|-----------|--------------|
| yes    | +         | ratios, bars |
| no     | n/a       | bars         |
| yes    | -         | ratios, bars |
| yes    | +         | p-, q-Values |
| yes    | -         | p-, q-Values |

Dot Plots Dot Plots

Fn Summary Table FnPg vs Fn FnSg vs Fn FnPgSg vs Fn FnPgSg vs FnPg FnSg vs FnPg FnPgSg vs FnSg Fn Coverage

| Protein | FnPgSg vs FnPg         |                      |          |          | Raw    |      | Normalized |          | Description                                               | Log <sub>2</sub> Ratios |    |    |   |   |   |   |
|---------|------------------------|----------------------|----------|----------|--------|------|------------|----------|-----------------------------------------------------------|-------------------------|----|----|---|---|---|---|
|         | Log <sub>2</sub> Ratio | Log <sub>2</sub> Sum | q-Value  | p-Value  | FnPgSg | FnPg | FnPgSg     | FnPg     |                                                           | -6                      | -4 | -2 | 0 | 2 | 4 | 6 |
| FN0739  | 1.104                  | 16.041               | 5.335e-4 | 9.82e-5  | 338    | 125  | 362.7402   | 171.2675 | AAL94935.1  Formiminotetrahydrofolate cyclodeaminase      |                         |    |    |   |   |   |   |
|         |                        |                      |          |          | 290    | 183  | 398.7560   | 183.0000 |                                                           |                         |    |    |   |   |   |   |
| FN0740  | -0.393                 | 16.992               | 1.717e-1 | 4.807e-1 | 308    | 147  | 330.5443   | 201.4106 | AAL94936.1  Imidazolonepropionase                         |                         |    |    |   |   |   |   |
|         |                        |                      |          |          | 218    | 626  | 299.7545   | 626.0000 |                                                           |                         |    |    |   |   |   |   |
| FN0741  | 0.542                  | 18.574               | 8.821e-2 | 1.802e-1 | 659    | 206  | 707.2360   | 282.2488 | AAL94937.1  Glutamate formiminotransferase                |                         |    |    |   |   |   |   |
|         |                        |                      |          |          | 582    | 753  | 800.2621   | 753.0000 |                                                           |                         |    |    |   |   |   |   |
| FN0742  | -0.060                 | 11.605               |          |          | 66     |      | 70.8309    |          | AAL94938.1  unknown                                       |                         |    |    |   |   |   |   |
|         |                        |                      |          |          | 28     | 57   | 38.5006    | 57.0000  |                                                           |                         |    |    |   |   |   |   |
| FN0743  |                        |                      |          |          | 13     |      | 13.9515    |          | AAL94939.1  ATP-dependent helicase, DinG family           |                         |    |    |   |   |   |   |
|         |                        |                      |          |          | 9      |      | 12.3752    |          |                                                           |                         |    |    |   |   |   |   |
| FN0745  | 0.039                  | 13.594               | 2.765e-1 | 9.162e-1 | 114    | 47   | 122.3443   | 64.3966  | AAL94941.1  metal dependent phosphohydrolase              |                         |    |    |   |   |   |   |
|         |                        |                      |          |          | 75     | 155  | 103.1266   | 155.0000 |                                                           |                         |    |    |   |   |   |   |
| FN0746  |                        |                      |          |          |        |      |            |          | AAL94942.1  Hypothetical Metal-Binding Protein            |                         |    |    |   |   |   |   |
|         |                        |                      |          |          |        |      | 17         | 23.2924  |                                                           |                         |    |    |   |   |   |   |
| FN0749  |                        |                      |          |          |        |      |            |          | AAL94945.1  Hypothetical protein                          |                         |    |    |   |   |   |   |
|         |                        |                      |          |          | 4      |      | 5.5001     |          |                                                           |                         |    |    |   |   |   |   |
| FN0750  | -1.055                 | 7.594                | 2.892e-2 | 3.608e-2 | 9      | 11   | 9.6588     | 15.0715  | AAL94946.1  Hypothetical protein                          |                         |    |    |   |   |   |   |
|         |                        |                      |          |          | 7      | 25   | 9.6251     | 25.0000  |                                                           |                         |    |    |   |   |   |   |
| FN0751  | -0.070                 | 7.927                | 2.538e-1 | 8.153e-1 | 13     | 8    | 13.9515    | 10.9611  | AAL94947.1  L-asparaginase I                              |                         |    |    |   |   |   |   |
|         |                        |                      |          |          | 12     | 21   | 16.5002    | 21.0000  |                                                           |                         |    |    |   |   |   |   |
| FN0752  | -1.180                 | 6.584                | 1.005e-1 | 2.212e-1 | 7      | 4    | 7.5124     | 5.4806   | AAL94948.1  Proline iminopeptidase                        |                         |    |    |   |   |   |   |
|         |                        |                      |          |          | 4      | 24   | 5.5001     | 24.0000  |                                                           |                         |    |    |   |   |   |   |
| FN0753  | 0.384                  | 13.604               | 4.261e-4 | 6.832e-5 | 121    | 74   | 129.8567   | 101.3903 | AAL94949.1  Glutamyl-tRNA(Gln) amidotransferase subunit B |                         |    |    |   |   |   |   |
|         |                        |                      |          |          | 91     | 94   | 125.1269   | 94.0000  |                                                           |                         |    |    |   |   |   |   |
| FN0754  | 0.132                  | 13.730               | 1.904e-1 | 5.553e-1 | 130    | 64   | 139.5154   | 87.6890  | AAL94950.1  Glutamyl-tRNA(Gln) amidotransferase subunit A |                         |    |    |   |   |   |   |
|         |                        |                      |          |          | 76     | 135  | 104.5016   | 135.0000 |                                                           |                         |    |    |   |   |   |   |
| FN0755  | 0.249                  | 10.243               | 6.245e-2 | 1.106e-1 | 31     | 24   | 33.2691    | 32.8834  | AAL94951.1  Glutamyl-tRNA(Gln) amidotransferase subunit C |                         |    |    |   |   |   |   |
|         |                        |                      |          |          | 31     | 31   | 42.6256    | 31.0000  |                                                           |                         |    |    |   |   |   |   |
| FN0758  | -0.315                 | 14.064               | 2.591e-2 | 3.069e-2 | 111    | 97   | 119.1247   | 132.9036 | AAL94954.1  Rod shape-determining protein mreB            |                         |    |    |   |   |   |   |
|         |                        |                      |          |          | 84     | 159  | 115.5017   | 159.0000 |                                                           |                         |    |    |   |   |   |   |
| FN0761  | -1.488                 | 9.008                |          |          | 15     |      | 16.0979    |          | AAL94957.1  Bvg accessory factor                          |                         |    |    |   |   |   |   |
|         |                        |                      |          |          | 8      | 38   | 11.0002    | 38.0000  |                                                           |                         |    |    |   |   |   |   |

Show detected proteins only  
 Show all proteins  
 Filter by category:

Proteins found: 1305

Enter (or paste) list of ORFs

Find ORFs

Test Cutoff

q-Value

p-Value

.005

| Signif | Direction | Applies To   |
|--------|-----------|--------------|
| yes    | +         | ratios, bars |
| no     | n/a       | bars         |
| yes    | -         | ratios, bars |
| yes    | +         | p-, q-Values |
| yes    | -         | p-, q-Values |

Dot Plots Dot Plots

Fn Summary Table FnPg vs Fn FnSg vs Fn FnPgSg vs Fn FnPgSg vs FnPg FnSg vs FnPg FnPgSg vs FnSg Fn Coverage

| Protein       | FnPgSg vs FnPg         |                      |          |          | Raw    |      | Normalized |           | Description                                                                | Log <sub>2</sub> Ratios |    |    |   |   |   |   |
|---------------|------------------------|----------------------|----------|----------|--------|------|------------|-----------|----------------------------------------------------------------------------|-------------------------|----|----|---|---|---|---|
|               | Log <sub>2</sub> Ratio | Log <sub>2</sub> Sum | q-Value  | p-Value  | FnPgSg | FnPg | FnPgSg     | FnPg      |                                                                            | -6                      | -4 | -2 | 0 | 2 | 4 | 6 |
| <b>FN0765</b> | -0.705                 | 4.909                |          |          | 4      | 7    | 4.2928     | 7.0000    | AAL94961.1  tRNA (5-methylaminomethyl -2-thiouridylate) -methyltransferase |                         |    |    |   |   |   |   |
| <b>FN0766</b> |                        |                      |          |          | 20     |      | 27.5004    |           | AAL94962.1  Large-conductance mechanosensitive channel                     |                         |    |    |   |   |   |   |
| <b>FN0768</b> | 0.102                  | 4.102                |          |          | 4      | 4    | 4.2928     | 4.0000    | AAL94964.1  Hemin receptor                                                 |                         |    |    |   |   |   |   |
| <b>FN0774</b> | 1.049                  | 13.142               | 9.962e-3 | 7.501e-3 | 105    | 60   | 112.6856   | 82.2084   | AAL94970.1  Hypothetical cytosolic protein                                 |                         |    |    |   |   |   |   |
| <b>FN0775</b> | -0.334                 | 16.039               | 1.62e-1  | 4.443e-1 | 218    | 126  | 233.9567   | 172.6376  | AAL94971.1  Aspartyl aminopeptidase                                        |                         |    |    |   |   |   |   |
| <b>FN0776</b> | -0.264                 | 12.011               | 1.524e-2 | 1.451e-2 | 58     | 48   | 62.2454    | 65.7667   | AAL94972.1  Aspartate-ammonia ligase                                       |                         |    |    |   |   |   |   |
| <b>FN0777</b> | 1.076                  | 12.019               | 1.108e-4 | 1.037e-5 | 91     | 29   | 97.6608    | 39.7341   | AAL94973.1  GTP-binding protein lepA                                       |                         |    |    |   |   |   |   |
| <b>FN0778</b> | -0.074                 | 7.912                |          |          |        | 5    |            | 6.8507    | AAL94974.1  Methyltransferase                                              |                         |    |    |   |   |   |   |
| <b>FN0779</b> |                        |                      |          |          |        |      |            | 5.0000    | AAL94975.1  Putative GTPases (G3E family)                                  |                         |    |    |   |   |   |   |
| <b>FN0783</b> | 0.817                  | 24.016               | 1.433e-2 | 1.31e-2  | 5918   | 2527 | 6351.1725  | 3462.3434 | AAL94979.1  acyl-CoA dehydrogenase                                         |                         |    |    |   |   |   |   |
| <b>FN0784</b> | 0.218                  | 22.331               | 1.348e-1 | 3.467e-1 | 1997   | 1903 | 2143.1719  | 2607.3761 | AAL94980.1  Electron transfer flavoprotein beta-subunit                    |                         |    |    |   |   |   |   |
| <b>FN0785</b> | -0.366                 | 21.485               | 1.978e-2 | 2.089e-2 | 1458   | 1553 | 1564.7194  | 2127.8272 | AAL94981.1  Electron transfer flavoprotein alpha-subunit                   |                         |    |    |   |   |   |   |
| <b>FN0788</b> | -0.581                 | 9.475                | 1.342e-2 | 1.181e-2 | 24     | 25   | 25.7567    | 34.2535   | AAL94984.1  unknown                                                        |                         |    |    |   |   |   |   |
| <b>FN0790</b> | -0.174                 | 5.022                |          |          | 5      | 3    | 5.3660     | 4.1104    | AAL94986.1  Xylose repressor                                               |                         |    |    |   |   |   |   |
| <b>FN0791</b> | -0.262                 | 18.129               | 7.291e-2 | 1.367e-1 | 459    | 367  | 492.5969   | 502.8413  | AAL94987.1  Histidine ammonia-lyase                                        |                         |    |    |   |   |   |   |
| <b>FN0792</b> | -0.382                 | 20.099               | 1.319e-1 | 3.348e-1 | 823    | 573  | 883.2401   | 785.0901  | AAL94988.1  Urocanate hydratase                                            |                         |    |    |   |   |   |   |

Show detected proteins only  
 Show all proteins  
 Filter by category:

Proteins found:  
1305

Test Cutoff

| Signif | Direction | Applies To   |
|--------|-----------|--------------|
| yes    | +         | ratios, bars |
| no     | n/a       | bars         |
| yes    | -         | ratios, bars |
| yes    | +         | p-, q-Values |
| yes    | -         |              |

| Fn Summary Table |                        | FnPg vs Fn           |          | FnSg vs Fn |        | FnPgSg vs Fn |          | FnPgSg vs FnPg |            | FnSg vs FnPg |                                                           | FnPgSg vs FnSg |                         | Fn Coverage |   |   |   |   |
|------------------|------------------------|----------------------|----------|------------|--------|--------------|----------|----------------|------------|--------------|-----------------------------------------------------------|----------------|-------------------------|-------------|---|---|---|---|
| Protein          | FnPgSg vs FnPg         |                      |          |            | Raw    |              |          |                | Normalized |              |                                                           |                | Log <sub>2</sub> Ratios |             |   |   |   |   |
|                  | Log <sub>2</sub> Ratio | Log <sub>2</sub> Sum | q-Value  | p-Value    | FnPgSg | FnPg         | FnPgSg   | FnPg           | FnPgSg     | FnPg         | Description                                               | -6             | -4                      | -2          | 0 | 2 | 4 | 6 |
| <b>FN0793</b>    | 1.334                  | 8.504                |          |            | 22     | 12           | 30.2505  | 12.0000        |            |              | AAL94989.1  Sodium/glutamate symport carrier protein      |                |                         |             |   |   |   |   |
| <b>FN0794</b>    | -0.998                 | 6.816                |          |            | 7      |              | 7.5124   |                |            |              | AAL94990.1  Hypothetical protein                          |                |                         |             |   |   |   |   |
| <b>FN0796</b>    | -0.387                 | 14.519               | 6.494e-2 | 1.166e-1   | 128    | 104          | 137.3691 | 142.4945       |            |              | AAL94992.1  Pyruvate,phosphate dikinase                   |                |                         |             |   |   |   |   |
| <b>FN0798</b>    | 0.512                  | 7.554                | 1.03e-1  | 2.302e-1   | 10     | 8            | 10.7320  | 10.9611        |            |              | AAL94994.1  Fructose-1,6-bisphosphatase                   |                |                         |             |   |   |   |   |
| <b>FN0799</b>    | -0.589                 | 8.193                |          |            | 13     | 8            | 13.9515  | 10.9611        |            |              | AAL94995.1  Isoamylase                                    |                |                         |             |   |   |   |   |
| <b>FN0800</b>    | 1.601                  | 11.811               | 1.504e-2 | 1.419e-2   | 110    | 5            | 118.0515 | 6.8507         |            |              | AAL94996.1  Amino acid-binding protein                    |                |                         |             |   |   |   |   |
| <b>FN0801</b>    |                        |                      |          |            |        |              |          |                |            |              | AAL94997.1  Amino acid transport ATP-binding protein      |                |                         |             |   |   |   |   |
| <b>FN0802</b>    |                        |                      |          |            |        |              |          |                |            |              | AAL94998.1  Amino acid transport system permease protein  |                |                         |             |   |   |   |   |
| <b>FN0803</b>    | -0.030                 | 11.480               | 2.651e-1 | 8.648e-1   | 55     | 46           | 59.0258  | 63.0264        |            |              | AAL94999.1  Cytochrome C-TYPE biogenesis protein ccdA     |                |                         |             |   |   |   |   |
| <b>FN0805</b>    | -1.738                 | 5.884                | 1.516e-3 | 4.597e-4   | 4      | 11           | 4.2928   | 15.0715        |            |              | AAL95001.1  Hypothetical protein                          |                |                         |             |   |   |   |   |
| <b>FN0806</b>    | 0.253                  | 12.312               | 5.498e-2 | 9.234e-2   | 81     | 45           | 86.9289  | 61.6563        |            |              | AAL95002.1  SpoIID homolog                                |                |                         |             |   |   |   |   |
| <b>FN0807</b>    | -0.207                 | 10.006               | 2.849e-2 | 3.526e-2   | 30     | 24           | 32.1959  | 32.8834        |            |              | AAL95003.1  3-deoxy-manno-octulosonate cytidyltransferase |                |                         |             |   |   |   |   |
| <b>FN0808</b>    | -0.586                 | 11.723               | 1.062e-2 | 8.316e-3   | 50     | 58           | 53.6598  | 79.4681        |            |              | AAL95004.1  Phosphoglycerate mutase                       |                |                         |             |   |   |   |   |
| <b>FN0809</b>    | 0.561                  | 6.561                |          |            | 11     |              | 11.8052  |                |            |              | AAL95005.1  23S rRNA methyltransferase                    |                |                         |             |   |   |   |   |
| <b>FN0810</b>    | -1.603                 | 9.977                | 3.696e-3 | 1.683e-3   | 16     | 45           | 17.1711  | 61.6563        |            |              | AAL95006.1  Low-specificity threonine aldolase            |                |                         |             |   |   |   |   |
| <b>FN0813</b>    | -2.063                 | 8.581                |          |            | 14     |              | 15.0247  |                |            |              | AAL95009.1  Transcriptional regulator, TetR family        |                |                         |             |   |   |   |   |

Show detected proteins only  
 Show all proteins  
 Filter by category:

Proteins found: 1305

Test Cutoff

q-Value

p-Value

| Signif | Direction | Applies To   |
|--------|-----------|--------------|
| yes    | +         | ratios, bars |
| no     | n/a       | bars         |
| yes    | -         | ratios, bars |
| yes    | +         | p-, q-Values |
| yes    | -         | p-, q-Values |

Fn Summary Table FnPg vs Fn FnSg vs Fn FnPgSg vs Fn FnPgSg vs FnPg FnSg vs FnPg FnPgSg vs FnSg Fn Coverage

| Protein | FnPgSg vs FnPg         |                      |          |          | Raw    |      | Normalized |          | Description                                         | Log <sub>2</sub> Ratios |    |    |   |   |   |   |
|---------|------------------------|----------------------|----------|----------|--------|------|------------|----------|-----------------------------------------------------|-------------------------|----|----|---|---|---|---|
|         | Log <sub>2</sub> Ratio | Log <sub>2</sub> Sum | q-Value  | p-Value  | FnPgSg | FnPg | FnPgSg     | FnPg     |                                                     | -6                      | -4 | -2 | 0 | 2 | 4 | 6 |
| FN0814  | 3.210                  | 12.677               | 1.028e-4 | 8.812e-6 | 241    | 33   | 258.6402   | 45.2146  | AAL95010.1  Propionate CoA-transferase              |                         |    |    |   |   |   |   |
|         |                        |                      |          |          | 170    | 8    | 233.7535   | 8.0000   |                                                     |                         |    |    |   |   |   |   |
| FN0815  |                        |                      |          |          | 61     |      | 65.4649    |          | AAL95011.1  Propionate permease                     |                         |    |    |   |   |   |   |
|         |                        |                      |          |          | 41     |      | 56.3758    |          |                                                     |                         |    |    |   |   |   |   |
| FN0816  | 0.574                  | 12.126               |          |          | 70     | 40   | 75.1237    | 54.8056  | AAL95012.1  dehydrogenase with MaoC-like domain     |                         |    |    |   |   |   |   |
|         |                        |                      |          |          | 64     |      | 88.0013    |          |                                                     |                         |    |    |   |   |   |   |
| FN0818  | 0.777                  | 19.073               | 3.084e-2 | 3.959e-2 | 852    | 567  | 914.3628   | 776.8693 | AAL95014.1  DNA-binding protein HU                  |                         |    |    |   |   |   |   |
|         |                        |                      |          |          | 749    | 358  | 1029.8905  | 358.0000 |                                                     |                         |    |    |   |   |   |   |
| FN0819  | 0.453                  | 11.837               | 6.012e-2 | 1.051e-1 | 55     | 47   | 59.0258    | 64.3966  | AAL95015.1  Tetratricopeptide repeat family protein |                         |    |    |   |   |   |   |
|         |                        |                      |          |          | 60     | 39   | 82.5012    | 39.0000  |                                                     |                         |    |    |   |   |   |   |
| FN0820  | -0.211                 | 14.484               | 1.36e-1  | 3.515e-1 | 120    | 94   | 128.7835   | 128.7931 | AAL95016.1  Mercuric reductase                      |                         |    |    |   |   |   |   |
|         |                        |                      |          |          | 111    | 197  | 152.6273   | 197.0000 |                                                     |                         |    |    |   |   |   |   |
| FN0821  | -0.841                 | 11.986               | 1.092e-1 | 2.534e-1 | 40     | 96   | 42.9278    | 131.5334 | AAL95017.1  Hypothetical protein                    |                         |    |    |   |   |   |   |
|         |                        |                      |          |          | 38     | 39   | 52.2508    | 39.0000  |                                                     |                         |    |    |   |   |   |   |
| FN0823  | -0.979                 | 9.728                | 4.119e-2 | 5.994e-2 | 22     | 21   | 23.6103    | 28.7729  | AAL95019.1  GTP-binding protein hflX                |                         |    |    |   |   |   |   |
|         |                        |                      |          |          | 13     | 53   | 17.8753    | 53.0000  |                                                     |                         |    |    |   |   |   |   |
| FN0825  | -0.461                 | 10.661               | 1.347e-1 | 3.462e-1 | 37     | 20   | 39.7082    | 27.4028  | AAL95021.1  Hypothetical cytosolic protein          |                         |    |    |   |   |   |   |
|         |                        |                      |          |          | 21     | 67   | 28.8754    | 67.0000  |                                                     |                         |    |    |   |   |   |   |
| FN0826  | 1.282                  | 8.916                | 4.308e-3 | 2.06e-3  | 28     | 14   | 30.0495    | 19.1820  | AAL95022.1  periplasmic component of efflux system  |                         |    |    |   |   |   |   |
|         |                        |                      |          |          | 28     | 9    | 38.5006    | 9.0000   |                                                     |                         |    |    |   |   |   |   |
| FN0827  | 0.587                  | 7.870                | 6.144e-3 | 3.415e-3 | 17     | 8    | 18.2443    | 10.9611  | AAL95023.1  ABC transporter ATP-binding protein     |                         |    |    |   |   |   |   |
|         |                        |                      |          |          | 14     | 14   | 19.2503    | 14.0000  |                                                     |                         |    |    |   |   |   |   |
| FN0828  |                        |                      |          |          | 6      |      | 6.4392     |          | AAL95024.1  ABC transporter permease protein        |                         |    |    |   |   |   |   |
|         |                        |                      |          |          |        |      |            |          |                                                     |                         |    |    |   |   |   |   |
| FN0830  | -2.398                 | 9.868                | 1.125e-3 | 2.942e-4 | 12     | 55   | 12.8783    | 75.3577  | AAL95026.1  Hypothetical protein                    |                         |    |    |   |   |   |   |
|         |                        |                      |          |          | 10     | 65   | 13.7502    | 65.0000  |                                                     |                         |    |    |   |   |   |   |
| FN0831  |                        |                      |          |          |        | 13   |            | 17.8118  | AAL95027.1  Hemin receptor                          |                         |    |    |   |   |   |   |
|         |                        |                      |          |          |        | 6    |            | 6.0000   |                                                     |                         |    |    |   |   |   |   |
| FN0832  | 0.117                  | 12.865               | 2.631e-1 | 8.56e-1  | 92     | 105  | 98.7340    | 143.8647 | AAL95028.1  Hypothetical protein                    |                         |    |    |   |   |   |   |
|         |                        |                      |          |          | 59     | 22   | 81.1262    | 22.0000  |                                                     |                         |    |    |   |   |   |   |
| FN0833  | 1.516                  | 6.160                |          |          | 10     |      | 10.7320    |          | AAL95029.1  Hypothetical protein                    |                         |    |    |   |   |   |   |
|         |                        |                      |          |          | 13     | 5    | 17.8753    | 5.0000   |                                                     |                         |    |    |   |   |   |   |

Show detected proteins only  
 Show all proteins  
 Filter by category:

Proteins found: 1305

Test Cutoff

| Signif | Direction | Applies To   |
|--------|-----------|--------------|
| yes    | +         | ratios, bars |
| no     | n/a       | bars         |
| yes    | -         | ratios, bars |
| yes    | +         | p-, q-Values |
| yes    | -         | p-, q-Values |



| Protein | FnPgSg vs FnPg         |                      |          |          | Raw    |      | Normalized |          | Description                                         | Log <sub>2</sub> Ratios |    |    |   |   |   |   |
|---------|------------------------|----------------------|----------|----------|--------|------|------------|----------|-----------------------------------------------------|-------------------------|----|----|---|---|---|---|
|         | Log <sub>2</sub> Ratio | Log <sub>2</sub> Sum | q-Value  | p-Value  | FnPgSg | FnPg | FnPgSg     | FnPg     |                                                     |                         |    |    |   |   |   |   |
|         |                        |                      |          |          |        |      |            |          |                                                     | -6                      | -4 | -2 | 0 | 2 | 4 | 6 |
| FN0834  | -0.455                 | 9.246                | 1.962e-1 | 5.8e-1   | 20     | 37   | 21.4639    | 50.6952  | AAL95030.1  Hypothetical Exported Protein           |                         |    |    |   |   |   |   |
|         |                        |                      |          |          | 15     | 7    | 20.6253    | 7.0000   |                                                     |                         |    |    |   |   |   |   |
| FN0835  |                        |                      |          |          |        | 27   |            | 36.9938  | AAL95031.1  Hypothetical protein                    |                         |    |    |   |   |   |   |
|         |                        |                      |          |          |        | 4    |            | 4.0000   |                                                     |                         |    |    |   |   |   |   |
| FN0836  | -0.677                 | 9.270                | 1.011e-1 | 2.233e-1 | 11     | 32   | 11.8052    | 43.8445  | AAL95032.1  Hypothetical protein                    |                         |    |    |   |   |   |   |
|         |                        |                      |          |          | 20     | 19   | 27.5004    | 19.0000  |                                                     |                         |    |    |   |   |   |   |
| FN0846  | -1.126                 | 12.326               | 1.663e-3 | 5.269e-4 | 43     | 83   | 46.1474    | 113.7216 | AAL95042.1  Hypothetical Exported Protein           |                         |    |    |   |   |   |   |
|         |                        |                      |          |          | 37     | 98   | 50.8758    | 98.0000  |                                                     |                         |    |    |   |   |   |   |
| FN0847  | -0.233                 | 5.767                |          |          | 5      |      | 5.3660     |          | AAL95043.1  TPR-repeat-containing proteins          |                         |    |    |   |   |   |   |
|         |                        |                      |          |          | 6      | 8    | 8.2501     | 8.0000   |                                                     |                         |    |    |   |   |   |   |
| FN0848  |                        |                      |          |          |        | 5    |            | 6.8507   | AAL95044.1  Hypothetical protein                    |                         |    |    |   |   |   |   |
|         |                        |                      |          |          |        |      |            |          |                                                     |                         |    |    |   |   |   |   |
| FN0849  | -1.551                 | 10.246               | 3.315e-6 | 7.371e-8 | 20     | 44   | 21.4639    | 60.2862  | AAL95045.1  8-amino-7-oxononanoate synthase         |                         |    |    |   |   |   |   |
|         |                        |                      |          |          | 14     | 59   | 19.2503    | 59.0000  |                                                     |                         |    |    |   |   |   |   |
| FN0850  | -1.578                 | 7.854                | 1.143e-2 | 9.277e-3 | 10     | 15   | 10.7320    | 20.5521  | AAL95046.1  Hypothetical cytosolic protein          |                         |    |    |   |   |   |   |
|         |                        |                      |          |          | 5      | 32   | 6.8751     | 32.0000  |                                                     |                         |    |    |   |   |   |   |
| FN0853  | -1.742                 | 11.830               | 4.891e-3 | 2.447e-3 | 32     | 91   | 34.3423    | 124.6827 | AAL95049.1  Glycogen synthase                       |                         |    |    |   |   |   |   |
|         |                        |                      |          |          | 23     | 96   | 31.6255    | 96.0000  |                                                     |                         |    |    |   |   |   |   |
| FN0854  | -1.404                 | 13.323               | 6.587e-3 | 3.811e-3 | 66     | 139  | 70.8309    | 190.4494 | AAL95050.1  Glucose-1-phosphate adenylyltransferase |                         |    |    |   |   |   |   |
|         |                        |                      |          |          | 39     | 139  | 53.6258    | 139.0000 |                                                     |                         |    |    |   |   |   |   |
| FN0855  | -1.327                 | 13.719               | 2.082e-2 | 2.247e-2 | 70     | 102  | 75.1237    | 139.7543 | AAL95051.1  Glucose-1-phosphate adenylyltransferase |                         |    |    |   |   |   |   |
|         |                        |                      |          |          | 52     | 228  | 71.5011    | 228.0000 |                                                     |                         |    |    |   |   |   |   |
| FN0856  | -1.851                 | 12.942               | 1.324e-3 | 3.785e-4 | 55     | 124  | 59.0258    | 169.8973 | AAL95052.1  1,4-alpha-glucan branching enzyme       |                         |    |    |   |   |   |   |
|         |                        |                      |          |          | 25     | 167  | 34.3755    | 167.0000 |                                                     |                         |    |    |   |   |   |   |
| FN0857  | -0.663                 | 15.476               | 3.839e-2 | 5.435e-2 | 165    | 155  | 177.0773   | 212.3717 | AAL95053.1  Glycogen phosphorylase                  |                         |    |    |   |   |   |   |
|         |                        |                      |          |          | 118    | 325  | 162.2524   | 325.0000 |                                                     |                         |    |    |   |   |   |   |
| FN0858  | -3.221                 | 8.261                | 6.376e-4 | 1.248e-4 | 3      | 35   | 3.2196     | 47.9549  | AAL95054.1  4-alpha-glucanotransferase              |                         |    |    |   |   |   |   |
|         |                        |                      |          |          | 6      | 59   | 8.2501     | 59.0000  |                                                     |                         |    |    |   |   |   |   |
| FN0865  | -3.055                 | 12.095               | 8.846e-2 | 1.809e-1 | 12     | 17   | 12.8783    | 23.2924  | AAL95061.1  unknown                                 |                         |    |    |   |   |   |   |
|         |                        |                      |          |          | 24     | 358  | 33.0005    | 358.0000 |                                                     |                         |    |    |   |   |   |   |
| FN0867  | 1.450                  | 11.533               | 1.722e-3 | 5.555e-4 | 78     | 24   | 83.7093    | 32.8834  | AAL95063.1  Long-chain-fatty-acid--CoA ligase       |                         |    |    |   |   |   |   |
|         |                        |                      |          |          | 70     | 33   | 96.2515    | 33.0000  |                                                     |                         |    |    |   |   |   |   |

Show detected proteins only  
 Show all proteins  
 Filter by category:

Proteins found: 1305

Enter (or paste) list of ORFs

Find ORFs

Test Cutoff

q-Value

p-Value

.005

| Signif | Direction | Applies To   |
|--------|-----------|--------------|
| yes    | +         | ratios, bars |
| no     | n/a       | bars         |
| yes    | -         | ratios, bars |
| yes    | +         | p-, q-Values |
| yes    | -         | p-, q-Values |

Dot Plots

Fn Summary Table FnPg vs Fn FnSg vs Fn FnPgSg vs Fn FnPgSg vs FnPg FnSg vs FnPg FnPgSg vs FnSg Fn Coverage

| Protein | FnPgSg vs FnPg         |                      |          |          | Raw    |      | Normalized |          | Description                                              | Log <sub>2</sub> Ratios |    |    |   |   |   |   |
|---------|------------------------|----------------------|----------|----------|--------|------|------------|----------|----------------------------------------------------------|-------------------------|----|----|---|---|---|---|
|         | Log <sub>2</sub> Ratio | Log <sub>2</sub> Sum | q-Value  | p-Value  | FnPgSg | FnPg | FnPgSg     | FnPg     |                                                          | -6                      | -4 | -2 | 0 | 2 | 4 | 6 |
| FN0869  | -0.313                 | 3.687                |          |          | 3      |      | 3.2196     |          | AAL95065.1  Hydrolase (HAD superfamily)                  |                         |    |    |   |   |   |   |
|         |                        |                      |          |          |        | 4    |            | 4.0000   |                                                          |                         |    |    |   |   |   |   |
| FN0870  |                        |                      |          |          | 10     |      | 10.7320    |          | AAL95066.1  Rhodanese-related sulfurtransferases         |                         |    |    |   |   |   |   |
|         |                        |                      |          |          | 9      |      | 12.3752    |          |                                                          |                         |    |    |   |   |   |   |
| FN0871  | -0.728                 | 7.272                |          |          | 9      |      | 9.6588     |          | AAL95067.1  3-dehydroquinase synthase                    |                         |    |    |   |   |   |   |
|         |                        |                      |          |          |        | 16   |            | 16.0000  |                                                          |                         |    |    |   |   |   |   |
| FN0873  | -1.577                 | 10.347               | 7.887e-2 | 1.527e-1 | 21     | 18   | 22.5371    | 24.6625  | AAL95069.1  Protease IV                                  |                         |    |    |   |   |   |   |
|         |                        |                      |          |          | 14     | 100  | 19.2503    | 100.0000 |                                                          |                         |    |    |   |   |   |   |
| FN0874  |                        |                      |          |          |        |      |            |          | AAL95070.1  Phosphohydrolase (MUTT/NUDIX family protein) |                         |    |    |   |   |   |   |
|         |                        |                      |          |          |        | 11   |            | 11.0000  |                                                          |                         |    |    |   |   |   |   |
| FN0875  |                        |                      |          |          | 5      |      | 5.3660     |          | AAL95071.1  23S rRNA methyltransferase                   |                         |    |    |   |   |   |   |
|         |                        |                      |          |          |        |      |            |          |                                                          |                         |    |    |   |   |   |   |
| FN0878  | 1.112                  | 8.383                | 1.551e-2 | 1.494e-2 | 27     | 5    | 28.9763    | 6.8507   | AAL95074.1  Transcriptional regulator, GntR family       |                         |    |    |   |   |   |   |
|         |                        |                      |          |          | 18     | 18   | 24.7504    | 18.0000  |                                                          |                         |    |    |   |   |   |   |
| FN0886  |                        |                      |          |          | 3      |      | 3.2196     |          | AAL95082.1  Hemin receptor                               |                         |    |    |   |   |   |   |
|         |                        |                      |          |          |        |      |            |          |                                                          |                         |    |    |   |   |   |   |
| FN0887  | 0.587                  | 10.397               | 3.454e-2 | 4.699e-2 | 48     | 16   | 51.5134    | 21.9222  | AAL95083.1  Oligoendopeptidase F                         |                         |    |    |   |   |   |   |
|         |                        |                      |          |          | 28     | 38   | 38.5006    | 38.0000  |                                                          |                         |    |    |   |   |   |   |
| FN0888  | 0.754                  | 8.976                | 3.335e-2 | 4.452e-2 | 21     | 15   | 22.5371    | 20.5521  | AAL95084.1  Uracil permease                              |                         |    |    |   |   |   |   |
|         |                        |                      |          |          | 26     | 14   | 35.7505    | 14.0000  |                                                          |                         |    |    |   |   |   |   |
| FN0889  |                        |                      |          |          |        | 37   |            | 50.6952  | AAL95085.1  hypothetical protein                         |                         |    |    |   |   |   |   |
|         |                        |                      |          |          |        | 9    |            | 9.0000   |                                                          |                         |    |    |   |   |   |   |
| FN0893  | 0.733                  | 6.348                |          |          | 14     |      | 15.0247    |          | AAL95089.1  Hypothetical protein                         |                         |    |    |   |   |   |   |
|         |                        |                      |          |          | 6      | 7    | 8.2501     | 7.0000   |                                                          |                         |    |    |   |   |   |   |
| FN0896  | 0.187                  | 7.824                | 2.098e-1 | 6.365e-1 | 12     | 6    | 12.8783    | 8.2208   | AAL95092.1  Hypothetical protein                         |                         |    |    |   |   |   |   |
|         |                        |                      |          |          | 14     | 20   | 19.2503    | 20.0000  |                                                          |                         |    |    |   |   |   |   |
| FN0898  |                        |                      |          |          |        |      |            |          | AAL95094.1  Hypothetical protein                         |                         |    |    |   |   |   |   |
|         |                        |                      |          |          |        | 5    |            | 5.0000   |                                                          |                         |    |    |   |   |   |   |
| FN0900  |                        |                      |          |          |        | 6    |            | 8.2208   | AAL95096.1  Metal dependent hydrolase                    |                         |    |    |   |   |   |   |
|         |                        |                      |          |          |        | 3    |            | 3.0000   |                                                          |                         |    |    |   |   |   |   |
| FN0901  |                        |                      |          |          |        |      |            |          | AAL95097.1  DNA polymerase, bacteriophage-type           |                         |    |    |   |   |   |   |
|         |                        |                      |          |          |        | 9    |            | 9.0000   |                                                          |                         |    |    |   |   |   |   |

Show detected proteins only  
 Show all proteins  
 Filter by category:

Proteins found:  
1305

Test Cutoff

| Signif      | Direction | Applies To |
|-------------|-----------|------------|
| red         | yes       | +          |
| yellow      | no        | n/a        |
| green       | yes       | -          |
| pink        | yes       | +          |
| light green | yes       | -          |

Applies To: ratios, bars; bars; ratios, bars; p-, q-Values

| Protein | FnPgSg vs FnPg         |                      |          |          | Raw    |      | Normalized |          | Description                                                                        | Log <sub>2</sub> Ratios |    |    |   |   |   |   |
|---------|------------------------|----------------------|----------|----------|--------|------|------------|----------|------------------------------------------------------------------------------------|-------------------------|----|----|---|---|---|---|
|         | Log <sub>2</sub> Ratio | Log <sub>2</sub> Sum | q-Value  | p-Value  | FnPgSg | FnPg | FnPgSg     | FnPg     |                                                                                    |                         |    |    |   |   |   |   |
|         |                        |                      |          |          |        |      |            |          |                                                                                    | -6                      | -4 | -2 | 0 | 2 | 4 | 6 |
| FN0902  |                        |                      |          |          | 6      |      | 6.4392     |          | AAL95098.1  5-formyltetrahydrofolate cyclo-ligase                                  |                         |    |    |   |   |   |   |
|         |                        |                      |          |          | 8      |      | 11.0002    |          |                                                                                    |                         |    |    |   |   |   |   |
| FN0903  | -0.527                 | 8.607                | 2.865e-2 | 3.556e-2 | 14     | 20   | 15.0247    | 27.4028  | AAL95099.1  Polysialic acid capsule expression protein kpsF                        |                         |    |    |   |   |   |   |
|         |                        |                      |          |          | 13     | 20   | 17.8753    | 20.0000  |                                                                                    |                         |    |    |   |   |   |   |
| FN0904  |                        |                      |          |          |        |      |            |          | AAL95100.1  NAD(FAD)-utilizing dehydrogenases                                      |                         |    |    |   |   |   |   |
|         |                        |                      |          |          |        | 4    |            | 4.0000   |                                                                                    |                         |    |    |   |   |   |   |
| FN0905  |                        |                      |          |          | 11     |      | 11.8052    |          | AAL95101.1  Hypothetical protein                                                   |                         |    |    |   |   |   |   |
|         |                        |                      |          |          | 10     |      | 13.7502    |          |                                                                                    |                         |    |    |   |   |   |   |
| FN0906  | -0.981                 | 8.100                | 3.369e-3 | 1.468e-3 | 13     | 15   | 13.9515    | 20.5521  | AAL95102.1  Glycerol-3-phosphate dehydrogenase [NAD(P)+]                           |                         |    |    |   |   |   |   |
|         |                        |                      |          |          | 7      | 26   | 9.6251     | 26.0000  |                                                                                    |                         |    |    |   |   |   |   |
| FN0908  | 0.159                  | 7.973                |          |          | 12     |      | 12.8783    |          | AAL95104.1  Tpl protein                                                            |                         |    |    |   |   |   |   |
|         |                        |                      |          |          | 15     | 15   | 20.6253    | 15.0000  |                                                                                    |                         |    |    |   |   |   |   |
| FN0909  |                        |                      |          |          |        |      |            |          | AAL95105.1  DNA repair protein radC                                                |                         |    |    |   |   |   |   |
|         |                        |                      |          |          |        | 7    |            | 9.5910   |                                                                                    |                         |    |    |   |   |   |   |
| FN0910  |                        |                      |          |          |        |      |            |          | AAL95106.1  Nicotinate-nucleotide--dimethylbenzimidazole phosphoribosyltransferase |                         |    |    |   |   |   |   |
|         |                        |                      |          |          |        | 8    |            | 8.0000   |                                                                                    |                         |    |    |   |   |   |   |
| FN0911  | -0.261                 | 6.079                |          |          | 7      |      | 7.5124     |          | AAL95107.1  Alpha-ribazole-5'-phosphate phosphatase                                |                         |    |    |   |   |   |   |
|         |                        |                      |          |          |        | 9    |            | 9.0000   |                                                                                    |                         |    |    |   |   |   |   |
| FN0912  |                        |                      |          |          |        |      |            |          | AAL95108.1  Cobalamin [5'-phosphate] synthase                                      |                         |    |    |   |   |   |   |
|         |                        |                      |          |          |        | 19   |            | 19.0000  |                                                                                    |                         |    |    |   |   |   |   |
| FN0913  | -1.635                 | 5.009                |          |          | 3      |      | 3.2196     |          | AAL95109.1  Cobinamide kinase                                                      |                         |    |    |   |   |   |   |
|         |                        |                      |          |          |        | 10   |            | 10.0000  |                                                                                    |                         |    |    |   |   |   |   |
| FN0915  | -0.471                 | 10.179               | 1.562e-1 | 4.232e-1 | 27     | 14   | 28.9763    | 19.1820  | AAL95111.1  PTS system, N-acetylglucosamine-specific IIA component                 |                         |    |    |   |   |   |   |
|         |                        |                      |          |          | 21     | 61   | 28.8754    | 61.0000  |                                                                                    |                         |    |    |   |   |   |   |
| FN0916  | 1.052                  | 15.226               | 7.365e-3 | 4.589e-3 | 301    | 70   | 323.0319   | 95.9098  | AAL95112.1  Hypothetical Exported Protein                                          |                         |    |    |   |   |   |   |
|         |                        |                      |          |          | 175    | 176  | 240.6286   | 176.0000 |                                                                                    |                         |    |    |   |   |   |   |
| FN0917  | 0.044                  | 4.044                |          |          |        |      |            |          | AAL95113.1  Hypothetical protein                                                   |                         |    |    |   |   |   |   |
|         |                        |                      |          |          | 3      | 4    | 4.1251     | 4.0000   |                                                                                    |                         |    |    |   |   |   |   |
| FN0920  | -0.475                 | 6.169                |          |          | 7      |      | 7.5124     |          | AAL95116.1  Protease HTPX                                                          |                         |    |    |   |   |   |   |
|         |                        |                      |          |          | 5      | 10   | 6.8751     | 10.0000  |                                                                                    |                         |    |    |   |   |   |   |
| FN0921  | -2.019                 | 8.964                |          |          | 13     |      | 13.9515    |          | AAL95117.1  Hypothetical protein                                                   |                         |    |    |   |   |   |   |
|         |                        |                      |          |          | 6      | 45   | 8.2501     | 45.0000  |                                                                                    |                         |    |    |   |   |   |   |

Show detected proteins only  
 Show all proteins  
 Filter by category:

Proteins found: 1305

Enter (or paste) list of ORFs

Find ORFs

Test Cutoff

q-Value

p-Value

.005

| Signif | Direction | Applies To   |
|--------|-----------|--------------|
| yes    | +         | ratios, bars |
| no     | n/a       | bars         |
| yes    | -         | ratios, bars |
| yes    | +         | p-, q-Values |
| yes    | -         | p-, q-Values |

Dot Plots  Dot Plots

Fn Summary Table FnPg vs Fn FnSg vs Fn FnPgSg vs Fn FnPgSg vs FnPg FnSg vs FnPg FnPgSg vs FnSg Fn Coverage

| Protein | FnPgSg vs FnPg         |                      |          |          | Raw    |      | Normalized |         | Description                                              | Log <sub>2</sub> Ratios            |    |    |   |   |   |   |
|---------|------------------------|----------------------|----------|----------|--------|------|------------|---------|----------------------------------------------------------|------------------------------------|----|----|---|---|---|---|
|         | Log <sub>2</sub> Ratio | Log <sub>2</sub> Sum | q-Value  | p-Value  | FnPgSg | FnPg | FnPgSg     | FnPg    |                                                          | -6                                 | -4 | -2 | 0 | 2 | 4 | 6 |
| FN0922  |                        |                      |          |          | 3      |      | 3.2196     |         | AAL95118.1  Homoserine kinase                            |                                    |    |    |   |   |   |   |
| FN0923  |                        |                      |          |          |        |      |            | 4       | 4.0000                                                   | AAL95119.1  Cardiolipin synthetase |    |    |   |   |   |   |
| FN0924  |                        |                      |          |          |        |      |            |         |                                                          | AAL95120.1  Hypothetical protein   |    |    |   |   |   |   |
| FN0925  | 0.578                  | 5.748                |          |          | 9      |      | 9.6588     |         | AAL95121.1  Hypothetical protein                         |                                    |    |    |   |   |   |   |
|         |                        |                      |          |          | 6      | 6    | 8.2501     | 6.0000  |                                                          |                                    |    |    |   |   |   |   |
| FN0926  | -2.171                 | 8.664                | 1.13e-4  | 1.085e-5 | 10     | 31   | 10.7320    | 42.4743 | AAL95122.1  GTP pyrophosphokinase                        |                                    |    |    |   |   |   |   |
|         |                        |                      |          |          | 6      | 43   | 8.2501     | 43.0000 |                                                          |                                    |    |    |   |   |   |   |
| FN0928  | -0.654                 | 5.990                |          |          | 8      |      | 8.5856     |         | AAL95124.1  O-sialoglycoprotein endopeptidase            |                                    |    |    |   |   |   |   |
|         |                        |                      |          |          | 3      | 10   | 4.1251     | 10.0000 |                                                          |                                    |    |    |   |   |   |   |
| FN0929  | -1.182                 | 7.271                |          |          |        |      |            |         | AAL95125.1  ATP/GTP hydrolase                            |                                    |    |    |   |   |   |   |
|         |                        |                      |          |          | 6      | 21   | 8.2501     | 21.0000 |                                                          |                                    |    |    |   |   |   |   |
| FN0930  |                        |                      |          |          |        | 7    |            | 9.5910  | AAL95126.1  Glycerol-3-phosphate cytidyltransferase      |                                    |    |    |   |   |   |   |
|         |                        |                      |          |          |        | 3    |            | 3.0000  |                                                          |                                    |    |    |   |   |   |   |
| FN0932  | -1.329                 | 6.485                |          |          | 6      |      | 6.4392     |         | AAL95128.1  Hypothetical protein                         |                                    |    |    |   |   |   |   |
|         |                        |                      |          |          | 4      | 15   | 5.5001     | 15.0000 |                                                          |                                    |    |    |   |   |   |   |
| FN0933  |                        |                      |          |          | 3      |      | 3.2196     |         | AAL95129.1  3-phosphoshikimate 1-carboxyvinyltransferase |                                    |    |    |   |   |   |   |
| FN0934  |                        |                      |          |          |        |      |            |         | AAL95130.1  Chorismate synthase                          |                                    |    |    |   |   |   |   |
| FN0938  |                        |                      |          |          |        |      |            |         | AAL95134.1  Hypothetical protein                         |                                    |    |    |   |   |   |   |
| FN0940  | -1.827                 | 8.888                |          |          | 10     |      | 10.7320    |         | AAL95136.1  Hypothetical protein                         |                                    |    |    |   |   |   |   |
|         |                        |                      |          |          | 9      | 41   | 12.3752    | 41.0000 |                                                          |                                    |    |    |   |   |   |   |
| FN0941  | -1.101                 | 11.022               | 6.863e-3 | 4.075e-3 | 26     | 42   | 27.9031    | 57.5459 | AAL95137.1  Gamma-glutamyltranspeptidase                 |                                    |    |    |   |   |   |   |
|         |                        |                      |          |          | 25     | 76   | 34.3755    | 76.0000 |                                                          |                                    |    |    |   |   |   |   |
| FN0943  | -2.841                 | 7.334                |          |          | 5      |      | 5.3660     |         | AAL95139.1  Sensory Transduction Protein Kinase          |                                    |    |    |   |   |   |   |
|         |                        |                      |          |          | 3      | 34   | 4.1251     | 34.0000 |                                                          |                                    |    |    |   |   |   |   |
| FN0944  |                        |                      |          |          |        |      |            |         | AAL95140.1  Na+ driven multidrug efflux pump             |                                    |    |    |   |   |   |   |

Show detected proteins only  
 Show all proteins  
 Filter by category:

Proteins found: 1305

Enter (or paste) list of ORFs

Find ORFs

Test Cutoff

q-Value

p-Value

.005

| Signif | Direction | Applies To   |
|--------|-----------|--------------|
| yes    | +         | ratios, bars |
| no     | n/a       | bars         |
| yes    | -         | ratios, bars |
| yes    | +         | p-, q-Values |
| yes    | -         | p-, q-Values |

Dot Plots Dot Plots

Fn Summary Table FnPg vs Fn FnSg vs Fn FnPgSg vs Fn FnPgSg vs FnPg FnSg vs FnPg FnPgSg vs FnSg Fn Coverage

| Protein | FnPgSg vs FnPg         |                      |          |          | Raw    |      | Normalized |          | Description                                                        | Log <sub>2</sub> Ratios |    |    |   |   |   |   |
|---------|------------------------|----------------------|----------|----------|--------|------|------------|----------|--------------------------------------------------------------------|-------------------------|----|----|---|---|---|---|
|         | Log <sub>2</sub> Ratio | Log <sub>2</sub> Sum | q-Value  | p-Value  | FnPgSg | FnPg | FnPgSg     | FnPg     |                                                                    | -6                      | -4 | -2 | 0 | 2 | 4 | 6 |
| FN0947  | 0.359                  | 13.050               | 1.111e-1 | 2.599e-1 | 88     | 80   | 94.4412    | 109.6112 | AAL95143.1  Hypothetical protein                                   |                         |    |    |   |   |   |   |
|         |                        |                      |          |          | 83     | 53   | 114.1267   | 53.0000  |                                                                    |                         |    |    |   |   |   |   |
| FN0949  | 0.379                  | 14.813               | 1.925e-1 | 5.644e-1 | 185    | 196  | 198.5412   | 268.5474 | AAL95145.1  DNA helicase                                           |                         |    |    |   |   |   |   |
|         |                        |                      |          |          | 137    | 29   | 188.3778   | 29.0000  |                                                                    |                         |    |    |   |   |   |   |
| FN0951  |                        |                      |          |          |        | 4    |            | 5.4806   | AAL95147.1  Precorrin-3B C17-methyltransferase                     |                         |    |    |   |   |   |   |
|         |                        |                      |          |          |        | 17   |            | 17.0000  |                                                                    |                         |    |    |   |   |   |   |
| FN0957  | -0.064                 | 9.114                | 2.587e-1 | 8.367e-1 | 16     | 22   | 17.1711    | 30.1431  | AAL95153.1  Precorrin-4 C11-methyltransferase                      |                         |    |    |   |   |   |   |
|         |                        |                      |          |          | 21     | 18   | 28.8754    | 18.0000  |                                                                    |                         |    |    |   |   |   |   |
| FN0958  |                        |                      |          |          |        | 20   |            | 27.4028  | AAL95154.1  unknown                                                |                         |    |    |   |   |   |   |
|         |                        |                      |          |          |        |      |            |          |                                                                    |                         |    |    |   |   |   |   |
| FN0959  | 0.212                  | 7.633                | 2.124e-1 | 6.467e-1 | 18     | 14   | 19.3175    | 19.1820  | AAL95155.1  Precorrin-2 C20-methyltransferase                      |                         |    |    |   |   |   |   |
|         |                        |                      |          |          | 8      | 7    | 11.0002    | 7.0000   |                                                                    |                         |    |    |   |   |   |   |
| FN0961  |                        |                      |          |          |        | 6    |            | 8.2208   | AAL95157.1  Hypothetical protein                                   |                         |    |    |   |   |   |   |
|         |                        |                      |          |          |        | 18   |            | 18.0000  |                                                                    |                         |    |    |   |   |   |   |
| FN0962  | -0.721                 | 9.470                | 7.793e-3 | 5.072e-3 | 22     | 28   | 23.6103    | 38.3639  | AAL95158.1  Hypothetical cytosolic protein                         |                         |    |    |   |   |   |   |
|         |                        |                      |          |          | 13     | 30   | 17.8753    | 30.0000  |                                                                    |                         |    |    |   |   |   |   |
| FN0964  | 0.098                  | 5.465                |          |          |        | 5    |            | 6.8507   | AAL95160.1  Precorrin-8W decarboxylase                             |                         |    |    |   |   |   |   |
|         |                        |                      |          |          | 5      | 6    | 6.8751     | 6.0000   |                                                                    |                         |    |    |   |   |   |   |
| FN0965  | -0.478                 | 11.451               | 4.843e-2 | 7.579e-2 | 31     | 51   | 33.2691    | 69.8771  | AAL95161.1  D-3-phosphoglycerate dehydrogenase                     |                         |    |    |   |   |   |   |
|         |                        |                      |          |          | 41     | 55   | 56.3758    | 55.0000  |                                                                    |                         |    |    |   |   |   |   |
| FN0966  |                        |                      |          |          |        | 3    |            | 3.0000   | AAL95162.1  Precorrin-6Y C5,15-methyltransferase (decarboxylating) |                         |    |    |   |   |   |   |
|         |                        |                      |          |          |        |      |            |          |                                                                    |                         |    |    |   |   |   |   |
| FN0967  | -1.575                 | 4.949                |          |          | 3      | 7    | 3.2196     | 9.5910   | AAL95163.1  CbiD protein                                           |                         |    |    |   |   |   |   |
|         |                        |                      |          |          |        |      |            |          |                                                                    |                         |    |    |   |   |   |   |
| FN0970  | 0.581                  | 7.829                |          |          | 19     | 9    | 20.3907    | 12.3313  | AAL95166.1  Precorrin-8X methylmutase                              |                         |    |    |   |   |   |   |
|         |                        |                      |          |          | 12     |      | 16.5002    |          |                                                                    |                         |    |    |   |   |   |   |
| FN0972  |                        |                      |          |          |        | 3    |            | 4.1104   | AAL95168.1  Cobyrinic acid a,c-diamide synthase                    |                         |    |    |   |   |   |   |
|         |                        |                      |          |          |        | 22   |            | 22.0000  |                                                                    |                         |    |    |   |   |   |   |
| FN0974  |                        |                      |          |          |        | 4    |            | 4.0000   | AAL95170.1  Lactoylglutathione lyase                               |                         |    |    |   |   |   |   |
|         |                        |                      |          |          |        |      |            |          |                                                                    |                         |    |    |   |   |   |   |
| FN0976  | -0.113                 | 10.941               | 1.466e-2 | 1.36e-2  | 41     | 33   | 44.0010    | 45.2146  | AAL95172.1  Hypothetical protein                                   |                         |    |    |   |   |   |   |
|         |                        |                      |          |          | 30     | 47   | 41.2506    | 47.0000  |                                                                    |                         |    |    |   |   |   |   |

Show detected proteins only  
 Show all proteins  
 Filter by category:

Proteins found: 1305

Test Cutoff

| Signif | Direction | Applies To   |
|--------|-----------|--------------|
| yes    | +         | ratios, bars |
| no     | n/a       | bars         |
| yes    | -         | ratios, bars |
| yes    | +         | p-, q-Values |
| yes    | -         |              |

Fn Summary Table FnPg vs Fn FnSg vs Fn FnPgSg vs Fn FnPgSg vs FnPg FnSg vs FnPg FnPgSg vs FnSg Fn Coverage

| Protein | FnPgSg vs FnPg         |                      |          |          | Raw    |      | Normalized |           | Description                                                              | Log <sub>2</sub> Ratios |    |    |   |   |   |   |
|---------|------------------------|----------------------|----------|----------|--------|------|------------|-----------|--------------------------------------------------------------------------|-------------------------|----|----|---|---|---|---|
|         | Log <sub>2</sub> Ratio | Log <sub>2</sub> Sum | q-Value  | p-Value  | FnPgSg | FnPg | FnPgSg     | FnPg      |                                                                          | -6                      | -4 | -2 | 0 | 2 | 4 | 6 |
| FN0977  | 0.440                  | 7.934                | 1.22e-1  | 2.977e-1 | 16     | 5    | 17.1711    | 6.8507    | AAL95173.1  Cobyric acid synthase                                        |                         |    |    |   |   |   |   |
|         |                        |                      |          |          | 14     | 20   | 19.2503    | 20.0000   |                                                                          |                         |    |    |   |   |   |   |
| FN0981  | 0.767                  | 13.495               | 5.68e-2  | 9.683e-2 | 142    | 29   | 152.3938   | 39.7341   | AAL95177.1  Phosphoribosylamine--glycine ligase                          |                         |    |    |   |   |   |   |
|         |                        |                      |          |          | 93     | 125  | 127.8769   | 125.0000  |                                                                          |                         |    |    |   |   |   |   |
| FN0982  | 0.353                  | 15.183               | 5.256e-2 | 8.594e-2 | 223    | 101  | 239.3227   | 138.3841  | AAL95178.1  Phosphoribosylaminoimidazolecarboxamide formyltransferase    |                         |    |    |   |   |   |   |
|         |                        |                      |          |          | 143    | 203  | 196.6280   | 203.0000  |                                                                          |                         |    |    |   |   |   |   |
| FN0983  | -0.264                 | 13.579               | 9.395e-2 | 1.985e-1 | 101    | 104  | 108.3928   | 142.4945  | AAL95179.1  Hypothetical protein                                         |                         |    |    |   |   |   |   |
|         |                        |                      |          |          | 68     | 100  | 93.5014    | 100.0000  |                                                                          |                         |    |    |   |   |   |   |
| FN0984  | -1.717                 | 8.256                | 5.642e-3 | 3.003e-3 | 9      | 20   | 9.6588     | 27.4028   | AAL95180.1  Tetracenomycin polyketide synthesis O-methyltransferase tcmP |                         |    |    |   |   |   |   |
|         |                        |                      |          |          | 7      | 36   | 9.6251     | 36.0000   |                                                                          |                         |    |    |   |   |   |   |
| FN0985  | 1.047                  | 7.047                |          |          | 18     |      | 19.3175    |           | AAL95181.1  Phosphoribosylglycinamide formyltransferase                  |                         |    |    |   |   |   |   |
|         |                        |                      |          |          | 10     | 8    | 13.7502    | 8.0000    |                                                                          |                         |    |    |   |   |   |   |
| FN0986  | 0.056                  | 14.906               | 2.727e-1 | 8.988e-1 | 151    | 64   | 162.0526   | 87.6890   | AAL95182.1  Phosphoribosylformylglycinamide cyclo-ligase                 |                         |    |    |   |   |   |   |
|         |                        |                      |          |          | 142    | 256  | 195.2529   | 256.0000  |                                                                          |                         |    |    |   |   |   |   |
| FN0987  | -0.090                 | 12.716               | 2.716e-1 | 8.939e-1 | 70     | 17   | 75.1237    | 23.2924   | AAL95183.1  Amidophosphoribosyltransferase                               |                         |    |    |   |   |   |   |
|         |                        |                      |          |          | 61     | 146  | 83.8763    | 146.0000  |                                                                          |                         |    |    |   |   |   |   |
| FN0988  | 0.723                  | 16.285               | 2.183e-2 | 2.406e-2 | 351    | 116  | 376.6917   | 158.9362  | AAL95184.1  Phosphoribosylamidoimidazole-succinocarboxamide synthase     |                         |    |    |   |   |   |   |
|         |                        |                      |          |          | 254    | 281  | 349.2553   | 281.0000  |                                                                          |                         |    |    |   |   |   |   |
| FN0989  | 0.212                  | 15.265               | 5.29e-2  | 8.682e-2 | 184    | 121  | 197.4680   | 165.7869  | AAL95185.1  Phosphoribosylaminoimidazole carboxylase catalytic subunit   |                         |    |    |   |   |   |   |
|         |                        |                      |          |          | 167    | 203  | 229.6285   | 203.0000  |                                                                          |                         |    |    |   |   |   |   |
| FN0990  | 0.279                  | 20.169               | 1.644e-1 | 4.532e-1 | 1063   | 411  | 1140.8071  | 563.1275  | AAL95186.1  Phosphoribosylformylglycinamide synthase                     |                         |    |    |   |   |   |   |
|         |                        |                      |          |          | 910    | 1408 | 1251.2689  | 1408.0000 |                                                                          |                         |    |    |   |   |   |   |
| FN0991  | 0.239                  | 9.861                | 2.17e-2  | 2.385e-2 | 31     | 22   | 33.2691    | 30.1431   | AAL95187.1  CDP-diacylglycerol--serine O-phosphatidyltransferase         |                         |    |    |   |   |   |   |
|         |                        |                      |          |          | 24     | 26   | 33.0005    | 26.0000   |                                                                          |                         |    |    |   |   |   |   |
| FN0992  | 0.614                  | 8.754                | 6.609e-2 | 1.194e-1 | 21     | 7    | 22.5371    | 9.5910    | AAL95188.1  ADP-heptose:LPS heptosyltransferase II                       |                         |    |    |   |   |   |   |
|         |                        |                      |          |          | 21     | 24   | 28.8754    | 24.0000   |                                                                          |                         |    |    |   |   |   |   |
| FN0994  | 0.689                  | 13.770               | 7.093e-2 | 1.315e-1 | 140    | 33   | 150.2474   | 45.2146   | AAL95190.1  Hypothetical protein                                         |                         |    |    |   |   |   |   |
|         |                        |                      |          |          | 109    | 141  | 149.8773   | 141.0000  |                                                                          |                         |    |    |   |   |   |   |
| FN0997  | -0.400                 | 10.273               | 1.803e-1 | 5.145e-1 | 34     | 13   | 36.4887    | 17.8118   | AAL95193.1  Hypothetical protein                                         |                         |    |    |   |   |   |   |
|         |                        |                      |          |          | 18     | 63   | 24.7504    | 63.0000   |                                                                          |                         |    |    |   |   |   |   |
| FN0998  | -0.437                 | 13.307               | 1.323e-1 | 3.367e-1 | 69     | 52   | 74.0505    | 71.2473   | AAL95194.1  Dipeptide-binding protein                                    |                         |    |    |   |   |   |   |
|         |                        |                      |          |          | 72     | 163  | 99.0015    | 163.0000  |                                                                          |                         |    |    |   |   |   |   |

Show detected proteins only  
 Show all proteins  
 Filter by category:

Proteins found:  
1305

Test Cutoff

| Signif | Direction | Applies To   |
|--------|-----------|--------------|
| yes    | +         | ratios, bars |
| no     | n/a       | bars         |
| yes    | -         | ratios, bars |
| yes    | +         | p-, q-Values |
| yes    | -         |              |

Fn Summary Table FnPg vs Fn FnSg vs Fn FnPgSg vs Fn FnPgSg vs FnPg FnSg vs FnPg FnPgSg vs FnSg Fn Coverage

| Protein | FnPgSg vs FnPg         |                      |          |          | Raw    |      | Normalized |           | Description                                                            | Log <sub>2</sub> Ratios |    |    |   |   |   |   |
|---------|------------------------|----------------------|----------|----------|--------|------|------------|-----------|------------------------------------------------------------------------|-------------------------|----|----|---|---|---|---|
|         | Log <sub>2</sub> Ratio | Log <sub>2</sub> Sum | q-Value  | p-Value  | FnPgSg | FnPg | FnPgSg     | FnPg      |                                                                        | -6                      | -4 | -2 | 0 | 2 | 4 | 6 |
| FN0999  | -2.963                 | 8.807                | 6.27e-2  | 1.112e-1 | 9      | 14   | 9.6588     | 19.1820   | AAL95195.1  Deblocking aminopeptidase                                  |                         |    |    |   |   |   |   |
|         |                        |                      |          |          | 4      | 99   | 5.5001     | 99.0000   |                                                                        |                         |    |    |   |   |   |   |
| FN1000  | 1.050                  | 9.958                |          |          | 41     | 16   | 44.0010    | 21.9222   | AAL95196.1  Biotin synthase                                            |                         |    |    |   |   |   |   |
|         |                        |                      |          |          | 34     |      | 46.7507    |           |                                                                        |                         |    |    |   |   |   |   |
| FN1001  | -0.746                 | 9.641                | 1.053e-1 | 2.39e-1  | 24     | 14   | 25.7567    | 19.1820   | AAL95197.1  Dethiobiotin synthetase                                    |                         |    |    |   |   |   |   |
|         |                        |                      |          |          | 13     | 54   | 17.8753    | 54.0000   |                                                                        |                         |    |    |   |   |   |   |
| FN1002  | -0.828                 | 11.337               | 7.835e-2 | 1.513e-1 | 34     | 69   | 36.4887    | 94.5396   | AAL95198.1  Adenosylmethionine-8-amino-7-oxononanoate aminotransferase |                         |    |    |   |   |   |   |
|         |                        |                      |          |          | 29     | 41   | 39.8756    | 41.0000   |                                                                        |                         |    |    |   |   |   |   |
| FN1003  | -2.119                 | 13.112               | 1.106e-1 | 2.583e-1 | 47     | 6    | 50.4402    | 8.2208    | AAL95199.1  Outer membrane protein P1 precursor                        |                         |    |    |   |   |   |   |
|         |                        |                      |          |          | 29     | 384  | 39.8756    | 384.0000  |                                                                        |                         |    |    |   |   |   |   |
| FN1004  | -0.423                 | 7.705                | 1.482e-2 | 1.385e-2 | 13     | 12   | 13.9515    | 16.4417   | AAL95200.1  Transcriptional regulator, TetR family                     |                         |    |    |   |   |   |   |
|         |                        |                      |          |          | 8      | 17   | 11.0002    | 17.0000   |                                                                        |                         |    |    |   |   |   |   |
| FN1005  | -0.264                 | 9.910                |          |          | 22     |      | 23.6103    |           | AAL95201.1  Hypothetical protein                                       |                         |    |    |   |   |   |   |
|         |                        |                      |          |          | 24     | 34   | 33.0005    | 34.0000   |                                                                        |                         |    |    |   |   |   |   |
| FN1006  |                        |                      |          |          |        |      |            |           | AAL95202.1  Acetyltransferase                                          |                         |    |    |   |   |   |   |
|         |                        |                      |          |          |        | 21   |            | 21.0000   |                                                                        |                         |    |    |   |   |   |   |
| FN1010  | 0.065                  | 14.806               | 2.626e-1 | 8.539e-1 | 165    | 73   | 177.0773   | 100.0202  | AAL95206.1  Hypothetical cytosolic protein                             |                         |    |    |   |   |   |   |
|         |                        |                      |          |          | 123    | 231  | 169.1275   | 231.0000  |                                                                        |                         |    |    |   |   |   |   |
| FN1011  | -1.022                 | 5.940                |          |          |        | 9    |            | 12.3313   | AAL95207.1  MGPA protein                                               |                         |    |    |   |   |   |   |
|         |                        |                      |          |          | 4      | 10   | 5.5001     | 10.0000   |                                                                        |                         |    |    |   |   |   |   |
| FN1012  | -1.421                 | 8.405                | 4.169e-3 | 1.973e-3 | 12     | 25   | 12.8783    | 34.2535   | AAL95208.1  HPR(Ser) kinase                                            |                         |    |    |   |   |   |   |
|         |                        |                      |          |          | 7      | 26   | 9.6251     | 26.0000   |                                                                        |                         |    |    |   |   |   |   |
| FN1014  | -1.725                 | 7.194                |          |          | 6      |      | 6.4392     |           | AAL95210.1  Folylpolylglutamate synthase                               |                         |    |    |   |   |   |   |
|         |                        |                      |          |          | 5      | 22   | 6.8751     | 22.0000   |                                                                        |                         |    |    |   |   |   |   |
| FN1015  | -0.665                 | 9.051                |          |          | 20     |      | 21.4639    |           | AAL95211.1  5'-methylthioadenosine nucleosidase                        |                         |    |    |   |   |   |   |
|         |                        |                      |          |          | 11     | 29   | 15.1252    | 29.0000   |                                                                        |                         |    |    |   |   |   |   |
| FN1016  | -1.045                 | 6.515                | 1.04e-1  | 2.341e-1 | 6      | 4    | 6.4392     | 5.4806    | AAL95212.1  Lipid A biosynthesis lauroyl acyltransferase               |                         |    |    |   |   |   |   |
|         |                        |                      |          |          | 5      | 22   | 6.8751     | 22.0000   |                                                                        |                         |    |    |   |   |   |   |
| FN1017  | 0.421                  | 12.947               | 1.035e-1 | 2.322e-1 | 93     | 34   | 99.8072    | 46.5848   | AAL95213.1  Hypothetical Exported Protein                              |                         |    |    |   |   |   |   |
|         |                        |                      |          |          | 77     | 107  | 105.8766   | 107.0000  |                                                                        |                         |    |    |   |   |   |   |
| FN1019  | -0.359                 | 24.345               | 8.252e-3 | 5.639e-3 | 3484   | 3572 | 3739.0140  | 4894.1395 | AAL95215.1  3-hydroxybutyryl-CoA dehydrogenase                         |                         |    |    |   |   |   |   |
|         |                        |                      |          |          | 3209   | 5563 | 4412.4415  | 5563.0000 |                                                                        |                         |    |    |   |   |   |   |

Show detected proteins only  
 Show all proteins  
 Filter by category:

Proteins found: 1305

Test Cutoff

| Signif | Direction | Applies To   |
|--------|-----------|--------------|
| yes    | +         | ratios, bars |
| no     | n/a       | bars         |
| yes    | -         | ratios, bars |
| yes    | +         | p-, q-Values |
| yes    | -         |              |

Fn Summary Table FnPg vs Fn FnSg vs Fn FnPgSg vs Fn FnPgSg vs FnPg FnSg vs FnPg FnPgSg vs FnSg Fn Coverage

| Protein | FnPgSg vs FnPg         |                      |          |          | Raw    |      | Normalized |           | Description                                                  | Log <sub>2</sub> Ratios |    |    |   |   |   |   |
|---------|------------------------|----------------------|----------|----------|--------|------|------------|-----------|--------------------------------------------------------------|-------------------------|----|----|---|---|---|---|
|         | Log <sub>2</sub> Ratio | Log <sub>2</sub> Sum | q-Value  | p-Value  | FnPgSg | FnPg | FnPgSg     | FnPg      |                                                              | -6                      | -4 | -2 | 0 | 2 | 4 | 6 |
| FN1020  | -0.548                 | 17.993               | 1.455e-2 | 1.343e-2 | 331    | 460  | 355.2278   | 630.2643  | AAL95216.1  3-hydroxybutyryl-CoA dehydratase                 |                         |    |    |   |   |   |   |
|         |                        |                      |          |          | 356    | 605  | 489.5074   | 605.0000  |                                                              |                         |    |    |   |   |   |   |
| FN1022  |                        |                      |          |          | 9      |      | 9.6588     |           | AAL95218.1  Calcium-transporting ATPase                      |                         |    |    |   |   |   |   |
|         |                        |                      |          |          | 12     |      | 16.5002    |           |                                                              |                         |    |    |   |   |   |   |
| FN1023  | -1.178                 | 6.997                |          |          | 7      |      | 7.5124     |           | AAL95219.1  5-Nitroimidazole antibiotic resistance protein   |                         |    |    |   |   |   |   |
|         |                        |                      |          |          |        | 17   |            | 17.0000   |                                                              |                         |    |    |   |   |   |   |
| FN1024  | 0.096                  | 20.332               | 2.291e-1 | 7.125e-1 | 1379   | 934  | 1479.9369  | 1279.7106 | AAL95220.1  DNA-binding protein HU                           |                         |    |    |   |   |   |   |
|         |                        |                      |          |          | 651    | 943  | 895.1385   | 943.0000  |                                                              |                         |    |    |   |   |   |   |
| FN1025  | -0.143                 | 8.197                |          |          | 15     |      | 16.0979    |           | AAL95221.1  Guanine-hypoxanthine permease                    |                         |    |    |   |   |   |   |
|         |                        |                      |          |          | 12     | 18   | 16.5002    | 18.0000   |                                                              |                         |    |    |   |   |   |   |
| FN1028  | 0.415                  | 10.018               | 9.453e-4 | 2.2e-4   | 36     | 21   | 38.6350    | 28.7729   | AAL95224.1  Deoxyuridine 5'-triphosphate nucleotidohydrolase |                         |    |    |   |   |   |   |
|         |                        |                      |          |          | 26     | 27   | 35.7505    | 27.0000   |                                                              |                         |    |    |   |   |   |   |
| FN1029  | -0.211                 | 12.329               | 9.931e-2 | 2.169e-1 | 73     | 55   | 78.3433    | 75.3577   | AAL95225.1  Zinc protease                                    |                         |    |    |   |   |   |   |
|         |                        |                      |          |          | 40     | 79   | 55.0008    | 79.0000   |                                                              |                         |    |    |   |   |   |   |
| FN1030  | -1.483                 | 7.687                |          |          | 8      |      | 8.5856     |           | AAL95226.1  Hypothetical membrane-spanning protein           |                         |    |    |   |   |   |   |
|         |                        |                      |          |          |        | 24   |            | 24.0000   |                                                              |                         |    |    |   |   |   |   |
| FN1031  | -1.541                 | 5.629                |          |          |        |      |            |           | AAL95227.1  Hypothetical membrane-spanning protein           |                         |    |    |   |   |   |   |
|         |                        |                      |          |          | 3      | 12   | 4.1251     | 12.0000   |                                                              |                         |    |    |   |   |   |   |
| FN1033  | -1.263                 | 10.623               | 3.927e-5 | 1.921e-6 | 26     | 46   | 27.9031    | 63.0264   | AAL95229.1  Methyltransferase                                |                         |    |    |   |   |   |   |
|         |                        |                      |          |          | 17     | 60   | 23.3754    | 60.0000   |                                                              |                         |    |    |   |   |   |   |
| FN1034  |                        |                      |          |          | 4      |      | 4.2928     |           | AAL95230.1  Transcriptional regulator, TetR family           |                         |    |    |   |   |   |   |
|         |                        |                      |          |          |        |      |            |           |                                                              |                         |    |    |   |   |   |   |
| FN1037  | -2.220                 | 5.594                |          |          | 3      |      | 3.2196     |           | AAL95233.1  Hypothetical cytosolic protein                   |                         |    |    |   |   |   |   |
|         |                        |                      |          |          |        | 15   |            | 15.0000   |                                                              |                         |    |    |   |   |   |   |
| FN1041  | -0.327                 | 6.701                | 1.623e-1 | 4.455e-1 | 8      | 5    | 8.5856     | 6.8507    | AAL95237.1  Acetyltransferase                                |                         |    |    |   |   |   |   |
|         |                        |                      |          |          | 7      | 16   | 9.6251     | 16.0000   |                                                              |                         |    |    |   |   |   |   |
| FN1042  | 0.555                  | 8.572                | 1.808e-2 | 1.847e-2 | 21     | 14   | 22.5371    | 19.1820   | AAL95238.1  S1 RNA binding domain                            |                         |    |    |   |   |   |   |
|         |                        |                      |          |          | 18     | 13   | 24.7504    | 13.0000   |                                                              |                         |    |    |   |   |   |   |
| FN1048  |                        |                      |          |          | 3      |      | 3.2196     |           | AAL95244.1  Hypothetical membrane-spanning protein           |                         |    |    |   |   |   |   |
|         |                        |                      |          |          |        |      |            |           |                                                              |                         |    |    |   |   |   |   |
| FN1050  |                        |                      |          |          |        | 22   |            | 30.1431   | AAL95246.1  Lactoylglutathione lyase                         |                         |    |    |   |   |   |   |
|         |                        |                      |          |          |        | 3    |            | 3.0000    |                                                              |                         |    |    |   |   |   |   |

Show detected proteins only  
 Show all proteins  
 Filter by category:

Proteins found: 1305

Enter (or paste) list of ORFs

Find ORFs

Test Cutoff

q-Value p-Value

.005

| Signif | Direction | Applies To   |
|--------|-----------|--------------|
| yes    | +         | ratios, bars |
| no     | n/a       | bars         |
| yes    | -         | ratios, bars |
| yes    | +         | p-, q-Values |
| yes    | -         | p-, q-Values |

Dot Plots Dot Plots



Fn Summary Table FnPg vs Fn FnSg vs Fn FnPgSg vs Fn FnPgSg vs FnPg FnSg vs FnPg FnPgSg vs FnSg Fn Coverage

| Protein       | FnPgSg vs FnPg         |                      |          |          | Raw    |      | Normalized |          | Description                                                    | Log <sub>2</sub> Ratios |    |    |   |   |   |   |
|---------------|------------------------|----------------------|----------|----------|--------|------|------------|----------|----------------------------------------------------------------|-------------------------|----|----|---|---|---|---|
|               | Log <sub>2</sub> Ratio | Log <sub>2</sub> Sum | q-Value  | p-Value  | FnPgSg | FnPg | FnPgSg     | FnPg     |                                                                | -6                      | -4 | -2 | 0 | 2 | 4 | 6 |
| <b>FN1053</b> |                        |                      |          |          |        | 8    |            | 10.9611  | AAL95249.1  Hypothetical protein                               |                         |    |    |   |   |   |   |
| <b>FN1055</b> | -0.631                 | 11.357               | 8.252e-2 | 1.631e-1 | 37     | 31   | 39.7082    | 42.4743  | AAL95251.1  Cysteine synthase                                  |                         |    |    |   |   |   |   |
| <b>FN1060</b> | -0.300                 | 9.661                | 1.346e-2 | 1.186e-2 | 26     | 22   | 27.9031    | 30.1431  | AAL95256.1  hypothetical cytosolic protein                     |                         |    |    |   |   |   |   |
| <b>FN1062</b> | 0.964                  | 13.036               | 6.708e-3 | 3.924e-3 | 113    | 60   | 121.2711   | 82.2084  | AAL95258.1  Hydrolase                                          |                         |    |    |   |   |   |   |
| <b>FN1063</b> | -2.594                 | 6.798                |          |          | 4      | 5    | 4.2928     | 6.8507   | AAL95259.1  N-acyl-L-amino acid amidohydrolase                 |                         |    |    |   |   |   |   |
| <b>FN1066</b> | 0.035                  | 6.290                | 2.769e-1 | 9.179e-1 | 9      | 4    | 9.6588     | 5.4806   | AAL95262.1  Exodeoxyribonuclease VII large subunit             |                         |    |    |   |   |   |   |
| <b>FN1067</b> | 0.386                  | 9.812                | 1.109e-1 | 2.592e-1 | 28     | 12   | 30.0495    | 16.4417  | AAL95263.1  Tetratricopeptide repeat family protein            |                         |    |    |   |   |   |   |
| <b>FN1068</b> |                        |                      |          |          |        | 3    |            | 4.1104   | AAL95264.1  Smf protein                                        |                         |    |    |   |   |   |   |
| <b>FN1069</b> | -0.299                 | 11.491               | 1.064e-2 | 8.34e-3  | 44     | 46   | 47.2206    | 63.0264  | AAL95265.1  DNA topoisomerase I                                |                         |    |    |   |   |   |   |
| <b>FN1070</b> | 0.653                  | 6.993                |          |          | 11     |      | 11.8052    |          | AAL95266.1  Glucose inhibited division protein A               |                         |    |    |   |   |   |   |
| <b>FN1071</b> |                        |                      |          |          | 6      |      | 6.4392     |          | AAL95267.1  Integrase/recombinase                              |                         |    |    |   |   |   |   |
| <b>FN1072</b> | -0.490                 | 10.065               | 5.198e-2 | 8.445e-2 | 22     | 34   | 23.6103    | 46.5848  | AAL95268.1  GTP-binding protein                                |                         |    |    |   |   |   |   |
| <b>FN1073</b> | -0.541                 | 4.629                |          |          |        |      |            |          | AAL95269.1  Hypothetical protein                               |                         |    |    |   |   |   |   |
| <b>FN1074</b> | -0.246                 | 8.852                | 1.45e-1  | 3.834e-1 | 15     | 13   | 16.0979    | 17.8118  | AAL95270.1  Signal recognition particle receptor FtsY          |                         |    |    |   |   |   |   |
| <b>FN1077</b> | 0.353                  | 10.611               |          |          | 41     |      | 44.0010    |          | AAL95273.1  Hypothetical protein                               |                         |    |    |   |   |   |   |
| <b>FN1078</b> | -0.476                 | 15.254               | 3.081e-2 | 3.954e-2 | 133    | 195  | 142.7350   | 267.1773 | AAL95274.1  Hypothetical exported 24-amino acid repeat protein |                         |    |    |   |   |   |   |

Show detected proteins only  
 Show all proteins  
 Filter by category:

Proteins found: 1305

Enter (or paste) list of ORFs

Find ORFs

Test Cutoff

q-Value

p-Value

.005

| Signif | Direction | Applies To   |
|--------|-----------|--------------|
| yes    | +         | ratios, bars |
| no     | n/a       | bars         |
| yes    | -         | ratios, bars |
| yes    | +         | p-, q-Values |
| yes    | -         | p-, q-Values |

Dot Plots Dot Plots

Fn Summary Table FnPg vs Fn FnSg vs Fn FnPgSg vs Fn FnPgSg vs FnPg FnSg vs FnPg FnPgSg vs FnSg Fn Coverage

| Protein | FnPgSg vs FnPg         |                      |          |          | Raw    |      | Normalized |          | Description                                                                       | Log <sub>2</sub> Ratios |    |    |   |   |   |   |
|---------|------------------------|----------------------|----------|----------|--------|------|------------|----------|-----------------------------------------------------------------------------------|-------------------------|----|----|---|---|---|---|
|         | Log <sub>2</sub> Ratio | Log <sub>2</sub> Sum | q-Value  | p-Value  | FnPgSg | FnPg | FnPgSg     | FnPg     |                                                                                   | -6                      | -4 | -2 | 0 | 2 | 4 | 6 |
| FN1079  | 0.039                  | 18.565               | 2.765e-1 | 9.161e-1 | 638    | 267  | 684.6989   | 365.8273 | AAL95275.1  Neutrophil-activating protein A                                       |                         |    |    |   |   |   |   |
|         |                        |                      |          |          | 420    | 863  | 577.5087   | 863.0000 |                                                                                   |                         |    |    |   |   |   |   |
| FN1080  | 0.748                  | 4.408                | 3.152e-3 | 1.322e-3 | 6      | 3    | 6.4392     | 4.1104   | AAL95276.1  Export ABC transporter                                                |                         |    |    |   |   |   |   |
|         |                        |                      |          |          | 4      | 3    | 5.5001     | 3.0000   |                                                                                   |                         |    |    |   |   |   |   |
| FN1081  | -0.778                 | 9.418                |          |          | 18     | 25   | 19.3175    | 34.2535  | AAL95277.1  unknown                                                               |                         |    |    |   |   |   |   |
|         |                        |                      |          |          | 15     |      | 20.6253    |          |                                                                                   |                         |    |    |   |   |   |   |
| FN1082  |                        |                      |          |          | 4      |      | 4.2928     |          | AAL95278.1  unknown                                                               |                         |    |    |   |   |   |   |
|         |                        |                      |          |          |        |      |            |          |                                                                                   |                         |    |    |   |   |   |   |
| FN1084  | 1.622                  | 11.687               | 7.835e-3 | 5.122e-3 | 75     | 31   | 80.4897    | 42.4743  | AAL95280.1  unknown                                                               |                         |    |    |   |   |   |   |
|         |                        |                      |          |          | 88     | 23   | 121.0018   | 23.0000  |                                                                                   |                         |    |    |   |   |   |   |
| FN1085  | -1.217                 | 12.707               | 1.667e-3 | 5.287e-4 | 41     | 101  | 44.0010    | 138.3841 | AAL95281.1  4-methyl-5(B-hydroxyethyl)-thiazole monophosphate biosynthesis enzyme |                         |    |    |   |   |   |   |
|         |                        |                      |          |          | 46     | 111  | 63.2510    | 111.0000 |                                                                                   |                         |    |    |   |   |   |   |
| FN1086  | 0.733                  | 6.348                |          |          | 14     |      | 15.0247    |          | AAL95282.1  Transporter                                                           |                         |    |    |   |   |   |   |
|         |                        |                      |          |          | 6      | 7    | 8.2501     | 7.0000   |                                                                                   |                         |    |    |   |   |   |   |
| FN1088  | 0.703                  | 9.585                | 1.4e-2   | 1.262e-2 | 30     | 12   | 32.1959    | 16.4417  | AAL95284.1  NADH oxidase                                                          |                         |    |    |   |   |   |   |
|         |                        |                      |          |          | 28     | 27   | 38.5006    | 27.0000  |                                                                                   |                         |    |    |   |   |   |   |
| FN1089  | -2.153                 | 12.090               | 2.185e-2 | 2.41e-2  | 34     | 69   | 36.4887    | 94.5396  | AAL95285.1  ATP-binding protein (contains P-loop)                                 |                         |    |    |   |   |   |   |
|         |                        |                      |          |          | 19     | 184  | 26.1254    | 184.0000 |                                                                                   |                         |    |    |   |   |   |   |
| FN1091  | 1.040                  | 6.623                | 9.028e-3 | 6.443e-3 | 15     | 5    | 16.0979    | 6.8507   | AAL95287.1  Sigma factor sigB regulation protein rsbU                             |                         |    |    |   |   |   |   |
|         |                        |                      |          |          | 9      | 7    | 12.3752    | 7.0000   |                                                                                   |                         |    |    |   |   |   |   |
| FN1092  | -0.693                 | 10.392               | 1.753e-1 | 4.947e-1 | 14     | 6    | 15.0247    | 8.2208   | AAL95288.1  Hypothetical protein                                                  |                         |    |    |   |   |   |   |
|         |                        |                      |          |          | 31     | 85   | 42.6256    | 85.0000  |                                                                                   |                         |    |    |   |   |   |   |
| FN1093  | 0.845                  | 11.009               | 6.844e-3 | 4.056e-3 | 57     | 29   | 61.1722    | 39.7341  | AAL95289.1  Hypothetical protein                                                  |                         |    |    |   |   |   |   |
|         |                        |                      |          |          | 44     | 28   | 60.5009    | 28.0000  |                                                                                   |                         |    |    |   |   |   |   |
| FN1094  |                        |                      |          |          |        |      |            |          | AAL95290.1  Dolichol-phosphate mannosyltransferase                                |                         |    |    |   |   |   |   |
|         |                        |                      |          |          |        |      | 33         | 33.0000  |                                                                                   |                         |    |    |   |   |   |   |
| FN1095  |                        |                      |          |          |        |      |            |          | AAL95291.1  unknown                                                               |                         |    |    |   |   |   |   |
|         |                        |                      |          |          |        |      | 8          | 10.9611  |                                                                                   |                         |    |    |   |   |   |   |
| FN1096  | -0.076                 | 10.723               | 2.707e-1 | 8.896e-1 | 49     | 47   | 52.5866    | 64.3966  | AAL95292.1  Hypothetical protein                                                  |                         |    |    |   |   |   |   |
|         |                        |                      |          |          | 20     | 20   | 27.5004    | 20.0000  |                                                                                   |                         |    |    |   |   |   |   |
| FN1097  | -1.149                 | 9.161                |          |          | 12     | 26   | 12.8783    | 35.6236  | AAL95293.1  Hypothetical protein                                                  |                         |    |    |   |   |   |   |
|         |                        |                      |          |          | 14     |      | 19.2503    |          |                                                                                   |                         |    |    |   |   |   |   |

Show detected proteins only  
 Show all proteins  
 Filter by category:

Proteins found:  
1305

Enter (or paste) list of ORFs

Find ORFs

Test Cutoff

q-Value

p-Value

| Signif | Direction | Applies To   |
|--------|-----------|--------------|
| yes    | +         | ratios, bars |
| no     | n/a       | bars         |
| yes    | -         | ratios, bars |
| yes    | +         | p-, q-Values |
| yes    | -         | p-, q-Values |

Dot Plots  Dot Plots

Fn Summary Table FnPg vs Fn FnSg vs Fn FnPgSg vs Fn FnPgSg vs FnPg FnSg vs FnPg FnPgSg vs FnSg Fn Coverage

| Protein | FnPgSg vs FnPg         |                      |          |          | Raw    |      | Normalized |          | Description                                         | Log <sub>2</sub> Ratios |    |    |   |   |   |   |
|---------|------------------------|----------------------|----------|----------|--------|------|------------|----------|-----------------------------------------------------|-------------------------|----|----|---|---|---|---|
|         | Log <sub>2</sub> Ratio | Log <sub>2</sub> Sum | q-Value  | p-Value  | FnPgSg | FnPg | FnPgSg     | FnPg     |                                                     | -6                      | -4 | -2 | 0 | 2 | 4 | 6 |
| FN1101  |                        |                      |          |          | 3      |      | 3.2196     |          | AAL95297.1  ATPase                                  |                         |    |    |   |   |   |   |
| FN1103  | -0.444                 | 9.579                | 6.127e-2 | 1.078e-1 | 16     | 23   | 17.1711    | 31.5132  | AAL95299.1  Excinuclease ABC subunit A              |                         |    |    |   |   |   |   |
|         |                        |                      |          |          | 22     | 33   | 30.2505    | 33.0000  |                                                     |                         |    |    |   |   |   |   |
| FN1104  |                        |                      |          |          | 5      |      | 5.3660     |          | AAL95300.1  Holliday junction DNA helicase ruvA     |                         |    |    |   |   |   |   |
| FN1105  | -0.054                 | 12.708               | 2.666e-1 | 8.714e-1 | 74     | 83   | 79.4165    | 113.7216 | AAL95301.1  Hypothetical protein                    |                         |    |    |   |   |   |   |
|         |                        |                      |          |          | 59     | 53   | 81.1262    | 53.0000  |                                                     |                         |    |    |   |   |   |   |
| FN1106  | -0.563                 | 11.411               | 1.249e-2 | 1.057e-2 | 39     | 51   | 41.8546    | 69.8771  | AAL95302.1  L-serine dehydratase                    |                         |    |    |   |   |   |   |
|         |                        |                      |          |          | 32     | 57   | 44.0007    | 57.0000  |                                                     |                         |    |    |   |   |   |   |
| FN1111  |                        |                      |          |          | 9      |      | 9.6588     |          | AAL95307.1  Dipeptide-binding protein               |                         |    |    |   |   |   |   |
|         |                        |                      |          |          | 7      |      | 9.6251     |          |                                                     |                         |    |    |   |   |   |   |
| FN1117  | 1.286                  | 11.603               | 1.516e-2 | 1.439e-2 | 79     | 39   | 84.7825    | 53.4355  | AAL95313.1  LSU ribosomal protein L21P              |                         |    |    |   |   |   |   |
|         |                        |                      |          |          | 65     | 18   | 89.3763    | 18.0000  |                                                     |                         |    |    |   |   |   |   |
| FN1119  | 1.378                  | 14.322               | 9.072e-3 | 6.491e-3 | 230    | 96   | 246.8350   | 131.5334 | AAL95315.1  LSU ribosomal protein L27P              |                         |    |    |   |   |   |   |
|         |                        |                      |          |          | 156    | 46   | 214.5032   | 46.0000  |                                                     |                         |    |    |   |   |   |   |
| FN1120  | -0.953                 | 15.144               | 1.162e-2 | 9.5e-3   | 128    | 166  | 137.3691   | 227.4432 | AAL95316.1  Phosphoenolpyruvate carboxykinase (ATP) |                         |    |    |   |   |   |   |
|         |                        |                      |          |          | 99     | 302  | 136.1271   | 302.0000 |                                                     |                         |    |    |   |   |   |   |
| FN1121  | 0.527                  | 12.258               | 2.112e-2 | 2.294e-2 | 72     | 34   | 77.2701    | 46.5848  | AAL95317.1  hypothetical cytosolic protein          |                         |    |    |   |   |   |   |
|         |                        |                      |          |          | 66     | 70   | 90.7514    | 70.0000  |                                                     |                         |    |    |   |   |   |   |
| FN1122  | 1.326                  | 13.071               | 2.949e-4 | 4.086e-5 | 143    | 41   | 153.4670   | 56.1757  | AAL95318.1  Long-chain-fatty-acid--CoA ligase       |                         |    |    |   |   |   |   |
|         |                        |                      |          |          | 102    | 61   | 140.2521   | 61.0000  |                                                     |                         |    |    |   |   |   |   |
| FN1123  | 2.377                  | 7.745                | 2.844e-2 | 3.518e-2 | 43     | 5    | 46.1474    | 6.8507   | AAL95319.1  Thioredoxin-like protein                |                         |    |    |   |   |   |   |
|         |                        |                      |          |          | 15     | 6    | 20.6253    | 6.0000   |                                                     |                         |    |    |   |   |   |   |
| FN1124  | 0.779                  | 16.209               | 1.569e-3 | 4.833e-4 | 312    | 133  | 334.8371   | 182.2286 | AAL95320.1  Outer membrane porin F                  |                         |    |    |   |   |   |   |
|         |                        |                      |          |          | 281    | 238  | 386.3808   | 238.0000 |                                                     |                         |    |    |   |   |   |   |
| FN1125  | -0.372                 | 11.858               | 1.974e-1 | 5.849e-1 | 46     | 18   | 49.3670    | 24.6625  | AAL95321.1  LemA protein                            |                         |    |    |   |   |   |   |
|         |                        |                      |          |          | 42     | 114  | 57.7509    | 114.0000 |                                                     |                         |    |    |   |   |   |   |
| FN1127  | -1.102                 | 11.845               | 3.37e-2  | 4.523e-2 | 40     | 83   | 42.9278    | 113.7216 | AAL95323.1  Hypothetical membrane-spanning protein  |                         |    |    |   |   |   |   |
|         |                        |                      |          |          | 29     | 64   | 39.8756    | 64.0000  |                                                     |                         |    |    |   |   |   |   |
| FN1128  | -0.752                 | 15.657               | 4.541e-2 | 6.888e-2 | 156    | 270  | 167.4185   | 369.9378 | AAL95324.1  Acylamino-acid-releasing enzyme         |                         |    |    |   |   |   |   |
|         |                        |                      |          |          | 133    | 220  | 182.8778   | 220.0000 |                                                     |                         |    |    |   |   |   |   |

Show detected proteins only  
 Show all proteins  
 Filter by category:

Proteins found:  
1305

Test Cutoff

| Signif | Direction | Applies To   |
|--------|-----------|--------------|
| yes    | +         | ratios, bars |
| no     | n/a       | bars         |
| yes    | -         | ratios, bars |
| yes    | +         | p-, q-Values |
| yes    | -         | p-, q-Values |

| Fn Summary Table |                        | FnPg vs Fn           |          | FnSg vs Fn |        | FnPgSg vs Fn |           | FnPgSg vs FnPg |                                                                 | FnSg vs FnPg |             | FnPgSg vs FnSg |                         | Fn Coverage |   |   |   |   |
|------------------|------------------------|----------------------|----------|------------|--------|--------------|-----------|----------------|-----------------------------------------------------------------|--------------|-------------|----------------|-------------------------|-------------|---|---|---|---|
| Protein          | FnPgSg vs FnPg         |                      |          |            | Raw    |              |           |                | Normalized                                                      |              |             |                | Log <sub>2</sub> Ratios |             |   |   |   |   |
|                  | Log <sub>2</sub> Ratio | Log <sub>2</sub> Sum | q-Value  | p-Value    | FnPgSg | FnPg         | FnPgSg    | FnPg           | FnPgSg                                                          | FnPg         | Description | -6             | -4                      | -2          | 0 | 2 | 4 | 6 |
| FN1129           | 0.553                  | 5.723                |          |            | 10     |              | 10.7320   |                | AAL95325.1  Chromosome partition protein smc                    |              |             |                |                         |             |   |   |   |   |
|                  |                        |                      |          |            | 5      | 6            | 6.8751    | 6.0000         |                                                                 |              |             |                |                         |             |   |   |   |   |
| FN1130           | 0.780                  | 5.424                |          |            | 8      |              | 8.5856    |                | AAL95326.1  Tetraacyldisaccharide 4'-kinase                     |              |             |                |                         |             |   |   |   |   |
|                  |                        |                      |          |            |        | 5            |           | 5.0000         |                                                                 |              |             |                |                         |             |   |   |   |   |
| FN1131           | -2.014                 | 5.387                |          |            | 3      |              | 3.2196    |                | AAL95327.1  Hypothetical protein                                |              |             |                |                         |             |   |   |   |   |
|                  |                        |                      |          |            |        | 13           |           | 13.0000        |                                                                 |              |             |                |                         |             |   |   |   |   |
| FN1133           | -0.425                 | 10.296               | 1.69e-1  | 4.706e-1   | 25     | 14           | 26.8299   | 19.1820        | AAL95329.1  N-acetylglucosamine-6-phosphate deacetylase         |              |             |                |                         |             |   |   |   |   |
|                  |                        |                      |          |            | 25     | 63           | 34.3755   | 63.0000        |                                                                 |              |             |                |                         |             |   |   |   |   |
| FN1134           | -0.212                 | 9.331                | 1.827e-1 | 5.238e-1   | 26     | 26           | 27.9031   | 35.6236        | AAL95330.1  Hypothetical cytosolic protein                      |              |             |                |                         |             |   |   |   |   |
|                  |                        |                      |          |            | 14     | 19           | 19.2503   | 19.0000        |                                                                 |              |             |                |                         |             |   |   |   |   |
| FN1135           | -0.578                 | 14.741               | 1.373e-1 | 3.561e-1   | 123    | 225          | 132.0031  | 308.2815       | AAL95331.1  Phosphonates-binding protein                        |              |             |                |                         |             |   |   |   |   |
|                  |                        |                      |          |            | 101    | 96           | 138.8771  | 96.0000        |                                                                 |              |             |                |                         |             |   |   |   |   |
| FN1136           | -0.989                 | 8.181                |          |            | 11     |              | 11.8052   |                | AAL95332.1  Phosphonates transport ATP-binding protein phnC     |              |             |                |                         |             |   |   |   |   |
|                  |                        |                      |          |            | 9      | 24           | 12.3752   | 24.0000        |                                                                 |              |             |                |                         |             |   |   |   |   |
| FN1137           |                        |                      |          |            |        |              |           |                | AAL95333.1  Phosphonates transport system permease protein phnE |              |             |                |                         |             |   |   |   |   |
|                  |                        |                      |          |            | 3      |              | 4.1251    |                |                                                                 |              |             |                |                         |             |   |   |   |   |
| FN1138           | 0.684                  | 19.288               | 3.659e-2 | 5.085e-2   | 1147   | 349          | 1230.9555 | 478.1788       | AAL95334.1  Hypothetical cytosolic protein                      |              |             |                |                         |             |   |   |   |   |
|                  |                        |                      |          |            | 580    | 784          | 797.5120  | 784.0000       |                                                                 |              |             |                |                         |             |   |   |   |   |
| FN1139           | -3.066                 | 9.513                | 5.823e-2 | 1.003e-1   | 11     | 20           | 11.8052   | 27.4028        | AAL95335.1  Activator of (R)-2-hydroxyglutaryl-CoA dehydratase  |              |             |                |                         |             |   |   |   |   |
|                  |                        |                      |          |            | 5      | 129          | 6.8751    | 129.0000       |                                                                 |              |             |                |                         |             |   |   |   |   |
| FN1140           |                        |                      |          |            |        |              |           |                | AAL95336.1  hypothetical protein                                |              |             |                |                         |             |   |   |   |   |
|                  |                        |                      |          |            |        | 25           |           | 25.0000        |                                                                 |              |             |                |                         |             |   |   |   |   |
| FN1142           | -0.635                 | 4.009                |          |            | 3      |              | 3.2196    |                | AAL95338.1  Oxygen-independent coproporphyrinogen III oxidase   |              |             |                |                         |             |   |   |   |   |
|                  |                        |                      |          |            |        | 5            |           | 5.0000         |                                                                 |              |             |                |                         |             |   |   |   |   |
| FN1143           | -0.289                 | 13.429               | 1.993e-1 | 5.93e-1    | 104    | 41           | 111.6124  | 56.1757        | AAL95339.1  Glucosamine-6-phosphate isomerase                   |              |             |                |                         |             |   |   |   |   |
|                  |                        |                      |          |            | 57     | 176          | 78.3762   | 176.0000       |                                                                 |              |             |                |                         |             |   |   |   |   |
| FN1144           | 1.772                  | 13.589               | 4.621e-3 | 2.264e-3   | 199    | 22           | 213.5660  | 30.1431        | AAL95340.1  Hypothetical Exported Protein                       |              |             |                |                         |             |   |   |   |   |
|                  |                        |                      |          |            | 143    | 90           | 196.6280  | 90.0000        |                                                                 |              |             |                |                         |             |   |   |   |   |
| FN1145           | 0.131                  | 8.843                | 2.379e-1 | 7.483e-1   | 20     | 8            | 21.4639   | 10.9611        | AAL95341.1  Oligoendopeptidase F                                |              |             |                |                         |             |   |   |   |   |
|                  |                        |                      |          |            | 17     | 30           | 23.3754   | 30.0000        |                                                                 |              |             |                |                         |             |   |   |   |   |
| FN1146           | 1.432                  | 7.511                |          |            | 17     | 6            | 18.2443   | 8.2208         | AAL95342.1  Hypothetical exported 24-amino acid repeat protein  |              |             |                |                         |             |   |   |   |   |
|                  |                        |                      |          |            | 19     |              | 26.1254   |                |                                                                 |              |             |                |                         |             |   |   |   |   |

Show detected proteins only  
 Show all proteins  
 Filter by category:

Proteins found: 1305

Test Cutoff

| Signif | Direction | Applies To   |
|--------|-----------|--------------|
| yes    | +         | ratios, bars |
| no     | n/a       | bars         |
| yes    | -         | ratios, bars |
| yes    | +         | p-, q-Values |
| yes    | -         | p-, q-Values |

Fn Summary Table FnPg vs Fn FnSg vs Fn FnPgSg vs Fn FnPgSg vs FnPg FnSg vs FnPg FnPgSg vs FnSg Fn Coverage

| Protein | FnPgSg vs FnPg         |                      |          |          | Raw    |      | Normalized |           | Description                                                | Log <sub>2</sub> Ratios |    |    |   |   |   |   |
|---------|------------------------|----------------------|----------|----------|--------|------|------------|-----------|------------------------------------------------------------|-------------------------|----|----|---|---|---|---|
|         | Log <sub>2</sub> Ratio | Log <sub>2</sub> Sum | q-Value  | p-Value  | FnPgSg | FnPg | FnPgSg     | FnPg      |                                                            | -6                      | -4 | -2 | 0 | 2 | 4 | 6 |
| FN1147  |                        |                      |          |          | 33     |      | 35.4155    |           | AAL95343.1  Hypothetical protein                           |                         |    |    |   |   |   |   |
|         |                        |                      |          |          | 43     |      | 59.1259    |           |                                                            |                         |    |    |   |   |   |   |
| FN1148  | -0.208                 | 11.035               | 2.527e-1 | 8.105e-1 | 41     | 4    | 44.0010    | 5.4806    | AAL95344.1  Serine/threonine sodium symporter              |                         |    |    |   |   |   |   |
|         |                        |                      |          |          | 30     | 93   | 41.2506    | 93.0000   |                                                            |                         |    |    |   |   |   |   |
| FN1149  | -0.202                 | 6.072                | 2.01e-1  | 6.004e-1 | 4      | 7    | 4.2928     | 9.5910    | AAL95345.1  ATP-dependent nuclease subunit A               |                         |    |    |   |   |   |   |
|         |                        |                      |          |          | 8      | 8    | 11.0002    | 8.0000    |                                                            |                         |    |    |   |   |   |   |
| FN1150  | 0.459                  | 4.459                |          |          |        |      |            |           | AAL95346.1  unknown                                        |                         |    |    |   |   |   |   |
|         |                        |                      |          |          | 4      | 4    | 5.5001     | 4.0000    |                                                            |                         |    |    |   |   |   |   |
| FN1152  | 0.567                  | 13.821               | 6.229e-2 | 1.102e-1 | 146    | 45   | 156.6866   | 61.6563   | AAL95348.1  Aspartate aminotransferase                     |                         |    |    |   |   |   |   |
|         |                        |                      |          |          | 99     | 136  | 136.1271   | 136.0000  |                                                            |                         |    |    |   |   |   |   |
| FN1153  |                        |                      |          |          | 37     |      | 39.7082    |           | AAL95349.1  Hypothetical protein                           |                         |    |    |   |   |   |   |
|         |                        |                      |          |          | 29     |      | 39.8756    |           |                                                            |                         |    |    |   |   |   |   |
| FN1154  |                        |                      |          |          |        |      |            |           | AAL95350.1  Ribonuclease BN                                |                         |    |    |   |   |   |   |
|         |                        |                      |          |          |        | 20   |            | 20.0000   |                                                            |                         |    |    |   |   |   |   |
| FN1157  |                        |                      |          |          | 12     |      | 12.8783    |           | AAL95353.1  Polypeptide deformylase                        |                         |    |    |   |   |   |   |
|         |                        |                      |          |          | 16     |      | 22.0003    |           |                                                            |                         |    |    |   |   |   |   |
| FN1159  | -0.542                 | 13.574               | 4.806e-2 | 7.492e-2 | 77     | 77   | 82.6361    | 105.5008  | AAL95355.1  Fructose-1,6-bisphosphatase                    |                         |    |    |   |   |   |   |
|         |                        |                      |          |          | 73     | 161  | 100.3765   | 161.0000  |                                                            |                         |    |    |   |   |   |   |
| FN1160  | 1.684                  | 4.854                |          |          | 9      |      | 9.6588     |           | AAL95356.1  SWF/SNF family helicase                        |                         |    |    |   |   |   |   |
|         |                        |                      |          |          | 7      | 3    | 9.6251     | 3.0000    |                                                            |                         |    |    |   |   |   |   |
| FN1161  | 0.874                  | 4.044                |          |          |        |      |            |           | AAL95357.1  Glutamate racemase                             |                         |    |    |   |   |   |   |
|         |                        |                      |          |          | 4      | 3    | 5.5001     | 3.0000    |                                                            |                         |    |    |   |   |   |   |
| FN1162  |                        |                      |          |          |        |      |            |           | AAL95358.1  Hydroxyacylglutathione hydrolase               |                         |    |    |   |   |   |   |
|         |                        |                      |          |          |        | 21   |            | 21.0000   |                                                            |                         |    |    |   |   |   |   |
| FN1163  | 0.413                  | 12.393               | 9.506e-2 | 2.023e-1 | 77     | 30   | 82.6361    | 41.1042   | AAL95359.1  Thioredoxin reductase                          |                         |    |    |   |   |   |   |
|         |                        |                      |          |          | 63     | 86   | 86.6263    | 86.0000   |                                                            |                         |    |    |   |   |   |   |
| FN1164  | -0.511                 | 6.073                |          |          |        | 7    |            | 9.5910    | AAL95360.1  Glucokinase                                    |                         |    |    |   |   |   |   |
|         |                        |                      |          |          | 5      | 10   | 6.8751     | 10.0000   |                                                            |                         |    |    |   |   |   |   |
| FN1165  | 1.181                  | 24.201               | 5.659e-5 | 3.271e-6 | 6372   | 2224 | 6838.4033  | 3047.1910 | AAL95361.1  D-galactose-binding protein                    |                         |    |    |   |   |   |   |
|         |                        |                      |          |          | 4643   | 2786 | 6384.2212  | 2786.0000 |                                                            |                         |    |    |   |   |   |   |
| FN1166  | -0.428                 | 14.385               | 5.173e-4 | 9.314e-5 | 112    | 128  | 120.1979   | 175.3779  | AAL95362.1  Galactoside transport ATP-binding protein mglA |                         |    |    |   |   |   |   |
|         |                        |                      |          |          | 96     | 164  | 132.0020   | 164.0000  |                                                            |                         |    |    |   |   |   |   |

Show detected proteins only  
 Show all proteins  
 Filter by category:  
 GO: amino acid transport

Proteins found:  
1305

Enter (or paste) list of ORFs

Test Cutoff  
  
 .005

| Signif | Direction | Applies To   |
|--------|-----------|--------------|
| yes    | +         | ratios, bars |
| no     | n/a       | bars         |
| yes    | -         | ratios, bars |
| yes    | +         | p-, q-Values |
| yes    | -         | p-, q-Values |

Dot Plots  Dot Plots

Fn Summary Table FnPg vs Fn FnSg vs Fn FnPgSg vs Fn FnPgSg vs FnPg FnSg vs FnPg FnPgSg vs FnSg Fn Coverage

| Protein | FnPgSg vs FnPg         |                      |          |          | Raw    |      | Normalized |           | Description                                                    | Log <sub>2</sub> Ratios |    |    |   |   |   |   |
|---------|------------------------|----------------------|----------|----------|--------|------|------------|-----------|----------------------------------------------------------------|-------------------------|----|----|---|---|---|---|
|         | Log <sub>2</sub> Ratio | Log <sub>2</sub> Sum | q-Value  | p-Value  | FnPgSg | FnPg | FnPgSg     | FnPg      |                                                                | -6                      | -4 | -2 | 0 | 2 | 4 | 6 |
| FN1167  |                        |                      |          |          | 26     |      | 27.9031    |           | AAL95363.1  Galactoside transport system permease protein mgIC |                         |    |    |   |   |   |   |
|         |                        |                      |          |          | 14     |      | 19.2503    |           |                                                                |                         |    |    |   |   |   |   |
| FN1169  | -0.285                 | 16.174               | 9.312e-2 | 1.958e-1 | 217    | 260  | 232.8835   | 356.2364  | AAL95365.1  L-lactate dehydrogenase                            |                         |    |    |   |   |   |   |
|         |                        |                      |          |          | 189    | 244  | 259.8789   | 244.0000  |                                                                |                         |    |    |   |   |   |   |
| FN1170  | -0.807                 | 24.928               | 4.348e-2 | 6.47e-2  | 3813   | 6878 | 4092.0954  | 9423.8219 | AAL95366.1  Pyruvate-flavodoxin oxidoreductase                 |                         |    |    |   |   |   |   |
|         |                        |                      |          |          | 3237   | 5525 | 4450.9421  | 5525.0000 |                                                                |                         |    |    |   |   |   |   |
| FN1171  | -0.388                 | 19.701               | 7.863e-2 | 1.521e-1 | 767    | 936  | 823.1411   | 1282.4509 | AAL95367.1  Acetate kinase                                     |                         |    |    |   |   |   |   |
|         |                        |                      |          |          | 575    | 830  | 790.6369   | 830.0000  |                                                                |                         |    |    |   |   |   |   |
| FN1172  | 0.499                  | 18.447               | 2.845e-3 | 1.133e-3 | 704    | 348  | 755.5298   | 476.8087  | AAL95368.1  Phosphate acetyltransferase                        |                         |    |    |   |   |   |   |
|         |                        |                      |          |          | 484    | 529  | 665.5100   | 529.0000  |                                                                |                         |    |    |   |   |   |   |
| FN1176  |                        |                      |          |          |        |      |            | 5.4806    | AAL95372.1  Hypothetical cytosolic protein                     |                         |    |    |   |   |   |   |
|         |                        |                      |          |          |        |      |            |           |                                                                |                         |    |    |   |   |   |   |
| FN1179  |                        |                      |          |          |        |      |            | 19.1820   | AAL95375.1  ATP-dependent RNA helicase                         |                         |    |    |   |   |   |   |
|         |                        |                      |          |          |        |      |            |           |                                                                |                         |    |    |   |   |   |   |
| FN1180  |                        |                      |          |          |        |      |            | 13.7014   | AAL95376.1  Hypothetical protein                               |                         |    |    |   |   |   |   |
|         |                        |                      |          |          |        |      |            |           |                                                                |                         |    |    |   |   |   |   |
| FN1181  | -1.956                 | 14.495               | 1.022e-1 | 2.275e-1 | 81     | 404  | 86.9289    | 553.5365  | AAL95377.1  unknown                                            |                         |    |    |   |   |   |   |
|         |                        |                      |          |          | 49     | 45   | 67.3760    | 45.0000   |                                                                |                         |    |    |   |   |   |   |
| FN1182  |                        |                      |          |          |        |      |            | 13.7014   | AAL95378.1  Hypothetical protein                               |                         |    |    |   |   |   |   |
|         |                        |                      |          |          |        |      |            |           |                                                                |                         |    |    |   |   |   |   |
| FN1183  | -1.422                 | 6.503                | 1.305e-2 | 1.13e-2  | 7      | 14   | 7.5124     | 19.1820   | AAL95379.1  Hypothetical cytosolic protein                     |                         |    |    |   |   |   |   |
|         |                        |                      |          |          | 3      | 12   | 4.1251     | 12.0000   |                                                                |                         |    |    |   |   |   |   |
| FN1184  |                        |                      |          |          |        |      |            | 5.4806    | AAL95380.1  Hypothetical protein                               |                         |    |    |   |   |   |   |
|         |                        |                      |          |          |        |      |            |           |                                                                |                         |    |    |   |   |   |   |
| FN1185  | -0.600                 | 10.578               | 1.248e-1 | 3.079e-1 | 31     | 52   | 33.2691    | 71.2473   | AAL95381.1  SIR2 family protein                                |                         |    |    |   |   |   |   |
|         |                        |                      |          |          | 22     | 25   | 30.2505    | 25.0000   |                                                                |                         |    |    |   |   |   |   |
| FN1186  | -3.651                 | 13.097               | 5.602e-2 | 9.491e-2 | 30     | 82   | 32.1959    | 112.3515  | AAL95382.1  Amidohydrolase                                     |                         |    |    |   |   |   |   |
|         |                        |                      |          |          | 15     | 551  | 20.6253    | 551.0000  |                                                                |                         |    |    |   |   |   |   |
| FN1187  | -0.476                 | 10.886               | 1.992e-1 | 5.927e-1 | 38     | 7    | 40.7814    | 9.5910    | AAL95383.1  Amino acid-binding protein                         |                         |    |    |   |   |   |   |
|         |                        |                      |          |          | 24     | 93   | 33.0005    | 93.0000   |                                                                |                         |    |    |   |   |   |   |
| FN1188  | 0.162                  | 11.071               | 2.475e-1 | 7.886e-1 | 53     | 10   | 56.8794    | 13.7014   | AAL95384.1  Hypothetical protein                               |                         |    |    |   |   |   |   |
|         |                        |                      |          |          | 30     | 74   | 41.2506    | 74.0000   |                                                                |                         |    |    |   |   |   |   |

Show detected proteins only  
 Show all proteins  
 Filter by category:

Proteins found:  
1305

Test Cutoff

| Signif | Direction | Applies To   |
|--------|-----------|--------------|
| yes    | +         | ratios, bars |
| no     | n/a       | bars         |
| yes    | -         | ratios, bars |
| yes    | +         | p-, q-Values |
| yes    | -         | p-, q-Values |

Fn Summary Table FnPg vs Fn FnSg vs Fn FnPgSg vs Fn FnPgSg vs FnPg FnSg vs FnPg FnPgSg vs FnSg Fn Coverage

| Protein | FnPgSg vs FnPg         |                      |          |          | Raw    |      | Normalized |          | Description                                      | Log <sub>2</sub> Ratios |    |    |   |   |   |   |
|---------|------------------------|----------------------|----------|----------|--------|------|------------|----------|--------------------------------------------------|-------------------------|----|----|---|---|---|---|
|         | Log <sub>2</sub> Ratio | Log <sub>2</sub> Sum | q-Value  | p-Value  | FnPgSg | FnPg | FnPgSg     | FnPg     |                                                  | -6                      | -4 | -2 | 0 | 2 | 4 | 6 |
| FN1189  | -0.362                 | 11.639               | 4.426e-4 | 7.239e-5 | 48     | 46   | 51.5134    | 63.0264  | AAL95385.1  Hypothetical protein                 |                         |    |    |   |   |   |   |
|         |                        |                      |          |          | 35     | 65   | 48.1257    | 65.0000  |                                                  |                         |    |    |   |   |   |   |
| FN1190  | 0.164                  | 12.753               | 4.181e-2 | 6.12e-2  | 87     | 54   | 93.3680    | 73.9876  | AAL95386.1  Probable cadmium-transporting ATPase |                         |    |    |   |   |   |   |
|         |                        |                      |          |          | 60     | 83   | 82.5012    | 83.0000  |                                                  |                         |    |    |   |   |   |   |
| FN1191  | -1.354                 | 9.630                |          |          | 20     |      | 21.4639    |          | AAL95387.1  unknown                              |                         |    |    |   |   |   |   |
|         |                        |                      |          |          | 10     | 45   | 13.7502    | 45.0000  |                                                  |                         |    |    |   |   |   |   |
| FN1192  | 0.813                  | 17.884               | 2.569e-3 | 9.785e-4 | 642    | 227  | 688.9917   | 311.0217 | AAL95388.1  unknown                              |                         |    |    |   |   |   |   |
|         |                        |                      |          |          | 447    | 431  | 614.6343   | 431.0000 |                                                  |                         |    |    |   |   |   |   |
| FN1198  | -0.414                 | 9.587                | 5.934e-2 | 1.031e-1 | 23     | 19   | 24.6835    | 26.0327  | AAL95394.1  Transporter                          |                         |    |    |   |   |   |   |
|         |                        |                      |          |          | 17     | 38   | 23.3754    | 38.0000  |                                                  |                         |    |    |   |   |   |   |
| FN1200  | -5.133                 | 12.533               |          |          | 5      |      | 5.3660     |          | AAL95396.1  Hypothetical protein                 |                         |    |    |   |   |   |   |
|         |                        |                      |          |          | 15     | 456  | 20.6253    | 456.0000 |                                                  |                         |    |    |   |   |   |   |
| FN1202  | -0.858                 | 8.687                | 6.926e-3 | 4.136e-3 | 14     | 18   | 15.0247    | 24.6625  | AAL95398.1  NH(3)-dependent NAD(+) synthetase    |                         |    |    |   |   |   |   |
|         |                        |                      |          |          | 11     | 30   | 15.1252    | 30.0000  |                                                  |                         |    |    |   |   |   |   |
| FN1203  |                        |                      |          |          |        |      | 8          | 10.9611  | AAL95399.1  GTP-binding protein                  |                         |    |    |   |   |   |   |
|         |                        |                      |          |          |        |      | 5          | 5.0000   |                                                  |                         |    |    |   |   |   |   |
| FN1204  |                        |                      |          |          |        |      | 10         | 13.7014  | AAL95400.1  Methyltransferase                    |                         |    |    |   |   |   |   |
|         |                        |                      |          |          |        |      | 13         | 13.0000  |                                                  |                         |    |    |   |   |   |   |
| FN1205  | 0.300                  | 11.847               | 1.744e-1 | 4.912e-1 | 55     | 20   | 59.0258    | 27.4028  | AAL95401.1  Protease                             |                         |    |    |   |   |   |   |
|         |                        |                      |          |          | 55     | 82   | 75.6261    | 82.0000  |                                                  |                         |    |    |   |   |   |   |
| FN1208  | -0.596                 | 5.444                |          |          | 5      | 6    | 5.3660     | 8.2208   | AAL95404.1  1-deoxyxylulose-5-phosphate synthase |                         |    |    |   |   |   |   |
|         |                        |                      |          |          |        | 8    |            | 8.0000   |                                                  |                         |    |    |   |   |   |   |
| FN1209  | 1.880                  | 9.694                |          |          | 67     |      | 71.9041    |          | AAL95405.1  Hypothetical RNA binding protein     |                         |    |    |   |   |   |   |
|         |                        |                      |          |          | 28     | 15   | 38.5006    | 15.0000  |                                                  |                         |    |    |   |   |   |   |
| FN1210  | 0.253                  | 10.168               | 1.046e-1 | 2.361e-1 | 28     | 22   | 30.0495    | 30.1431  | AAL95406.1  Metal dependent hydrolase            |                         |    |    |   |   |   |   |
|         |                        |                      |          |          | 32     | 32   | 44.0007    | 32.0000  |                                                  |                         |    |    |   |   |   |   |
| FN1211  | 1.275                  | 6.642                | 4.827e-2 | 7.542e-2 | 20     | 5    | 21.4639    | 6.8507   | AAL95407.1  Cell division protein ftsI           |                         |    |    |   |   |   |   |
|         |                        |                      |          |          | 7      | 6    | 9.6251     | 6.0000   |                                                  |                         |    |    |   |   |   |   |
| FN1213  | 0.479                  | 10.515               | 1.034e-1 | 2.319e-1 | 47     | 13   | 50.4402    | 17.8118  | AAL95409.1  Hypothetical protein                 |                         |    |    |   |   |   |   |
|         |                        |                      |          |          | 29     | 47   | 39.8756    | 47.0000  |                                                  |                         |    |    |   |   |   |   |
| FN1214  |                        |                      |          |          | 6      |      | 6.4392     |          | AAL95410.1  Fe-S oxidoreductase                  |                         |    |    |   |   |   |   |
|         |                        |                      |          |          | 5      |      | 6.8751     |          |                                                  |                         |    |    |   |   |   |   |

Show detected proteins only  
 Show all proteins  
 Filter by category:

Proteins found:  
1305

Test Cutoff

| Signif      | Direction | Applies To |
|-------------|-----------|------------|
| red         | yes       | +          |
| yellow      | no        | n/a        |
| green       | yes       | -          |
| pink        | yes       | +          |
| light green | yes       | -          |

Applies To: ratios, bars; bars; ratios, bars; p-, q-Values

Fn Summary Table FnPg vs Fn FnSg vs Fn FnPgSg vs Fn FnPgSg vs FnPg FnSg vs FnPg FnPgSg vs FnSg Fn Coverage

| Protein | FnPgSg vs FnPg         |                      |          |          | Raw    |      | Normalized |           | Description                                                                    | Log <sub>2</sub> Ratios |    |    |   |   |   |   |
|---------|------------------------|----------------------|----------|----------|--------|------|------------|-----------|--------------------------------------------------------------------------------|-------------------------|----|----|---|---|---|---|
|         | Log <sub>2</sub> Ratio | Log <sub>2</sub> Sum | q-Value  | p-Value  | FnPgSg | FnPg | FnPgSg     | FnPg      |                                                                                | -6                      | -4 | -2 | 0 | 2 | 4 | 6 |
| FN1216  | -0.675                 | 6.335                | 8.412e-2 | 1.678e-1 | 3      | 10   | 3.2196     | 13.7014   | AAL95412.1  RRF2 family protein                                                |                         |    |    |   |   |   |   |
|         |                        |                      |          |          | 8      | 9    | 11.0002    | 9.0000    |                                                                                | ■                       |    |    |   |   |   |   |
| FN1217  | -0.561                 | 5.054                |          |          | 5      |      | 5.3660     |           | AAL95413.1  Holliday junction DNA helicase ruvB                                |                         |    |    |   |   |   |   |
|         |                        |                      |          |          | 3      | 7    | 4.1251     | 7.0000    |                                                                                | ■                       |    |    |   |   |   |   |
| FN1218  |                        |                      |          |          |        |      |            |           | AAL95414.1  unknown                                                            |                         |    |    |   |   |   |   |
|         |                        |                      |          |          |        | 13   |            | 13.0000   |                                                                                |                         |    |    |   |   |   |   |
| FN1219  | 0.072                  | 8.375                | 2.487e-1 | 7.936e-1 | 22     | 15   | 23.6103    | 20.5521   | AAL95415.1  Hypothetical protein                                               |                         |    |    |   |   |   |   |
|         |                        |                      |          |          | 10     | 15   | 13.7502    | 15.0000   |                                                                                |                         |    |    |   |   |   |   |
| FN1220  | 0.173                  | 15.321               | 5.507e-2 | 9.256e-2 | 212    | 127  | 227.5175   | 174.0078  | AAL95416.1  Cysteine synthase                                                  |                         |    |    |   |   |   |   |
|         |                        |                      |          |          | 147    | 207  | 202.1280   | 207.0000  |                                                                                | ■                       |    |    |   |   |   |   |
| FN1221  | -0.040                 | 8.520                | 2.832e-1 | 9.47e-1  | 16     | 5    | 17.1711    | 6.8507    | AAL95417.1  Hypothetical protein                                               |                         |    |    |   |   |   |   |
|         |                        |                      |          |          | 15     | 32   | 20.6253    | 32.0000   |                                                                                |                         |    |    |   |   |   |   |
| FN1222  | -0.009                 | 7.575                | 2.889e-1 | 9.741e-1 | 9      | 10   | 9.6588     | 13.7014   | AAL95418.1  Hypothetical protein                                               |                         |    |    |   |   |   |   |
|         |                        |                      |          |          | 13     | 14   | 17.8753    | 14.0000   |                                                                                |                         |    |    |   |   |   |   |
| FN1223  | 0.124                  | 12.932               | 1.753e-1 | 4.947e-1 | 90     | 74   | 96.5876    | 101.3903  | AAL95419.1  Oxygen-insensitive NAD(P)H nitroreductase                          |                         |    |    |   |   |   |   |
|         |                        |                      |          |          | 64     | 68   | 88.0013    | 68.0000   |                                                                                |                         |    |    |   |   |   |   |
| FN1224  | -0.022                 | 13.201               | 2.847e-1 | 9.542e-1 | 100    | 42   | 107.3196   | 57.5459   | AAL95420.1  2-dehydro-3-deoxyphosphooctonate aldolase                          |                         |    |    |   |   |   |   |
|         |                        |                      |          |          | 62     | 138  | 85.2513    | 138.0000  |                                                                                |                         |    |    |   |   |   |   |
| FN1225  | 0.586                  | 13.839               | 5.862e-2 | 1.013e-1 | 147    | 45   | 157.7598   | 61.6563   | AAL95421.1  UDP-N-acetylmuramoyl-L-alanyl-D-glutamate--meso-lanthionine ligase |                         |    |    |   |   |   |   |
|         |                        |                      |          |          | 101    | 136  | 138.8771   | 136.0000  |                                                                                | ■                       |    |    |   |   |   |   |
| FN1226  | 0.351                  | 12.669               | 1.612e-1 | 4.415e-1 | 84     | 24   | 90.1484    | 32.8834   | AAL95422.1  Uracil-DNA glycosylase                                             |                         |    |    |   |   |   |   |
|         |                        |                      |          |          | 67     | 110  | 92.1264    | 110.0000  |                                                                                | ■                       |    |    |   |   |   |   |
| FN1230  |                        |                      |          |          | 62     |      | 66.5381    |           | AAL95426.1  Hypothetical cytosolic protein                                     |                         |    |    |   |   |   |   |
|         |                        |                      |          |          | 37     |      | 50.8758    |           |                                                                                |                         |    |    |   |   |   |   |
| FN1231  | -0.113                 | 18.873               | 2.642e-1 | 8.607e-1 | 592    | 166  | 635.3319   | 227.4432  | AAL95427.1  Inosine-5'-monophosphate dehydrogenase                             |                         |    |    |   |   |   |   |
|         |                        |                      |          |          | 507    | 1214 | 697.1355   | 1214.0000 |                                                                                | ■                       |    |    |   |   |   |   |
| FN1234  |                        |                      |          |          | 8      |      | 8.5856     |           | AAL95430.1  Hypothetical protein                                               |                         |    |    |   |   |   |   |
|         |                        |                      |          |          | 5      |      | 6.8751     |           |                                                                                |                         |    |    |   |   |   |   |
| FN1235  | -0.850                 | 8.132                | 1.028e-1 | 2.297e-1 | 13     | 8    | 13.9515    | 10.9611   | AAL95431.1  Ankyrin repeat proteins                                            |                         |    |    |   |   |   |   |
|         |                        |                      |          |          | 8      | 34   | 11.0002    | 34.0000   |                                                                                | ■                       |    |    |   |   |   |   |
| FN1237  | -1.431                 | 11.101               | 2.257e-3 | 8.196e-4 | 25     | 51   | 26.8299    | 69.8771   | AAL95433.1  Choline kinase                                                     |                         |    |    |   |   |   |   |
|         |                        |                      |          |          | 22     | 84   | 30.2505    | 84.0000   |                                                                                | ■                       |    |    |   |   |   |   |

Show detected proteins only  
 Show all proteins  
 Filter by category:

Proteins found: 1305

Test Cutoff

| Signif | Direction | Applies To   |
|--------|-----------|--------------|
| ■      | +         | ratios, bars |
| ■      | n/a       | bars         |
| ■      | -         | ratios, bars |
| ■      | +         | p-, q-Values |
| ■      | -         |              |





Fn Summary Table FnPg vs Fn FnSg vs Fn FnPgSg vs Fn FnPgSg vs FnPg FnSg vs FnPg FnPgSg vs FnSg Fn Coverage

| Protein | FnPgSg vs FnPg         |                      |          |          | Raw    |      | Normalized |          | Description                                              | Log <sub>2</sub> Ratios |    |    |   |   |   |   |
|---------|------------------------|----------------------|----------|----------|--------|------|------------|----------|----------------------------------------------------------|-------------------------|----|----|---|---|---|---|
|         | Log <sub>2</sub> Ratio | Log <sub>2</sub> Sum | q-Value  | p-Value  | FnPgSg | FnPg | FnPgSg     | FnPg     |                                                          | -6                      | -4 | -2 | 0 | 2 | 4 | 6 |
| FN1258  | 0.524                  | 19.520               | 1.03e-2  | 7.915e-3 | 987    | 595  | 1059.2442  | 815.2332 | AAL95454.1  C4-dicarboxylate-binding protein             |                         |    |    |   |   |   |   |
|         |                        |                      |          |          | 742    | 631  | 1020.2654  | 631.0000 |                                                          |                         |    |    |   |   |   |   |
| FN1260  |                        |                      |          |          | 3      |      | 3.2196     |          | AAL95456.1  Sensory Transduction Protein Kinase          |                         |    |    |   |   |   |   |
|         |                        |                      |          |          |        |      |            |          |                                                          |                         |    |    |   |   |   |   |
| FN1261  |                        |                      |          |          |        | 10   |            | 13.7014  | AAL95457.1  Two-component response regulator             |                         |    |    |   |   |   |   |
|         |                        |                      |          |          |        |      |            |          |                                                          |                         |    |    |   |   |   |   |
| FN1262  |                        |                      |          |          |        | 20   |            | 20.0000  | AAL95458.1  Integral membrane protein                    |                         |    |    |   |   |   |   |
|         |                        |                      |          |          |        |      |            |          |                                                          |                         |    |    |   |   |   |   |
| FN1263  | 0.379                  | 7.675                | 5.1e-2   | 8.2e-2   | 15     | 11   | 16.0979    | 15.0715  | AAL95459.1  Cobalt chelataase                            |                         |    |    |   |   |   |   |
|         |                        |                      |          |          | 12     | 10   | 16.5002    | 10.0000  |                                                          |                         |    |    |   |   |   |   |
| FN1264  |                        |                      |          |          | 11     |      | 11.8052    |          | AAL95460.1  Hypothetical protein                         |                         |    |    |   |   |   |   |
|         |                        |                      |          |          | 8      |      | 11.0002    |          |                                                          |                         |    |    |   |   |   |   |
| FN1265  | -0.535                 | 12.631               | 2.142e-2 | 2.341e-2 | 49     | 64   | 52.5866    | 87.6890  | AAL95461.1  Outer membrane protein                       |                         |    |    |   |   |   |   |
|         |                        |                      |          |          | 58     | 104  | 79.7512    | 104.0000 |                                                          |                         |    |    |   |   |   |   |
| FN1266  | 0.191                  | 13.555               | 1.125e-1 | 2.645e-1 | 98     | 63   | 105.1732   | 86.3188  | AAL95462.1  UTP--glucose-1-phosphate uridylyltransferase |                         |    |    |   |   |   |   |
|         |                        |                      |          |          | 94     | 119  | 129.2519   | 119.0000 |                                                          |                         |    |    |   |   |   |   |
| FN1267  | -0.450                 | 10.393               | 5.226e-2 | 8.518e-2 | 29     | 37   | 31.1227    | 50.6952  | AAL95463.1  Hypothetical protein                         |                         |    |    |   |   |   |   |
|         |                        |                      |          |          | 23     | 35   | 31.6255    | 35.0000  |                                                          |                         |    |    |   |   |   |   |
| FN1268  | -0.103                 | 15.280               | 3.814e-2 | 5.386e-2 | 187    | 155  | 200.6876   | 212.3717 | AAL95464.1  Methionyl-tRNA synthetase                    |                         |    |    |   |   |   |   |
|         |                        |                      |          |          | 134    | 201  | 184.2528   | 201.0000 |                                                          |                         |    |    |   |   |   |   |
| FN1269  | 0.044                  | 4.044                |          |          |        |      |            |          | AAL95465.1  Hypothetical lipoprotein                     |                         |    |    |   |   |   |   |
|         |                        |                      |          |          | 3      | 4    | 4.1251     | 4.0000   |                                                          |                         |    |    |   |   |   |   |
| FN1270  | 3.182                  | 11.966               |          |          | 177    |      | 189.9556   |          | AAL95466.1  Hypothetical cytosolic protein               |                         |    |    |   |   |   |   |
|         |                        |                      |          |          | 139    | 21   | 191.1279   | 21.0000  |                                                          |                         |    |    |   |   |   |   |
| FN1271  | 0.679                  | 10.509               | 8.683e-2 | 1.759e-1 | 49     | 9    | 52.5866    | 12.3313  | AAL95467.1  Protease IV                                  |                         |    |    |   |   |   |   |
|         |                        |                      |          |          | 32     | 48   | 44.0007    | 48.0000  |                                                          |                         |    |    |   |   |   |   |
| FN1273  | -1.537                 | 9.617                | 1.198e-1 | 2.898e-1 | 14     | 4    | 15.0247    | 5.4806   | AAL95469.1  Outer membrane protein tolC                  |                         |    |    |   |   |   |   |
|         |                        |                      |          |          | 13     | 90   | 17.8753    | 90.0000  |                                                          |                         |    |    |   |   |   |   |
| FN1274  | 0.433                  | 7.366                | 1.519e-1 | 4.081e-1 | 15     | 3    | 16.0979    | 4.1104   | AAL95470.1  Acriflavin resistance protein E              |                         |    |    |   |   |   |   |
|         |                        |                      |          |          | 10     | 18   | 13.7502    | 18.0000  |                                                          |                         |    |    |   |   |   |   |
| FN1275  | 0.666                  | 8.536                | 4.553e-2 | 6.916e-2 | 26     | 7    | 27.9031    | 9.5910   | AAL95471.1  Acriflavin resistance protein B              |                         |    |    |   |   |   |   |
|         |                        |                      |          |          | 15     | 21   | 20.6253    | 21.0000  |                                                          |                         |    |    |   |   |   |   |

Show detected proteins only  
 Show all proteins  
 Filter by category:

Proteins found: 1305

Test Cutoff

| Signif | Direction | Applies To   |
|--------|-----------|--------------|
| yes    | +         | ratios, bars |
| no     | n/a       | bars         |
| yes    | -         | ratios, bars |
| yes    | +         | p-, q-Values |
| yes    | -         |              |

Fn Summary Table FnPg vs Fn FnSg vs Fn FnPgSg vs Fn FnPgSg vs FnPg FnSg vs FnPg FnPgSg vs FnSg Fn Coverage

| Protein | FnPgSg vs FnPg         |                      |          |          | Raw    |      | Normalized |          | Description                                                          | Log <sub>2</sub> Ratios |    |    |   |   |   |   |
|---------|------------------------|----------------------|----------|----------|--------|------|------------|----------|----------------------------------------------------------------------|-------------------------|----|----|---|---|---|---|
|         | Log <sub>2</sub> Ratio | Log <sub>2</sub> Sum | q-Value  | p-Value  | FnPgSg | FnPg | FnPgSg     | FnPg     |                                                                      | -6                      | -4 | -2 | 0 | 2 | 4 | 6 |
| FN1276  | -1.157                 | 7.168                | 3.697e-3 | 1.684e-3 | 6      | 13   | 6.4392     | 17.8118  | AAL95472.1  Hypothetical protein                                     |                         |    |    |   |   |   |   |
|         |                        |                      |          |          | 7      | 18   | 9.6251     | 18.0000  |                                                                      |                         |    |    |   |   |   |   |
| FN1277  | -0.298                 | 15.359               | 1.58e-1  | 4.298e-1 | 169    | 107  | 181.3701   | 146.6050 | AAL95473.1  Aminoacyl-histidine dipeptidase                          |                         |    |    |   |   |   |   |
|         |                        |                      |          |          | 137    | 308  | 188.3778   | 308.0000 |                                                                      |                         |    |    |   |   |   |   |
| FN1278  | 2.044                  | 5.214                |          |          |        |      |            |          | AAL95474.1  Acetyltransferase                                        |                         |    |    |   |   |   |   |
|         |                        |                      |          |          | 9      | 3    | 12.3752    | 3.0000   |                                                                      |                         |    |    |   |   |   |   |
| FN1279  | -0.194                 | 11.489               | 8.004e-2 | 1.56e-1  | 46     | 37   | 49.3670    | 50.6952  | AAL95475.1  Zinc metallohydrolase, glyoxalase II family              |                         |    |    |   |   |   |   |
|         |                        |                      |          |          | 37     | 64   | 50.8758    | 64.0000  |                                                                      |                         |    |    |   |   |   |   |
| FN1280  | -1.994                 | 9.717                | 5.39e-4  | 9.995e-5 | 13     | 40   | 13.9515    | 54.8056  | AAL95476.1  Serine protease, V8 family                               |                         |    |    |   |   |   |   |
|         |                        |                      |          |          | 11     | 61   | 15.1252    | 61.0000  |                                                                      |                         |    |    |   |   |   |   |
| FN1281  |                        |                      |          |          |        |      |            |          | AAL95477.1  Cysteine protease                                        |                         |    |    |   |   |   |   |
|         |                        |                      |          |          |        |      |            |          |                                                                      | 12                      |    |    |   |   |   |   |
| FN1282  | 0.233                  | 13.079               | 1.369e-1 | 3.545e-1 | 97     | 80   | 104.1000   | 109.6112 | AAL95478.1  LSU ribosomal protein L17P                               |                         |    |    |   |   |   |   |
|         |                        |                      |          |          | 71     | 62   | 97.6265    | 62.0000  |                                                                      |                         |    |    |   |   |   |   |
| FN1283  | 1.265                  | 18.687               | 8.716e-5 | 6.423e-6 | 947    | 287  | 1016.3164  | 393.2301 | AAL95479.1  DNA-directed RNA polymerase alpha chain                  |                         |    |    |   |   |   |   |
|         |                        |                      |          |          | 726    | 445  | 998.2650   | 445.0000 |                                                                      |                         |    |    |   |   |   |   |
| FN1284  | 0.448                  | 18.380               | 1.071e-1 | 2.46e-1  | 628    | 525  | 673.9669   | 719.3234 | AAL95480.1  SSU ribosomal protein S4P                                |                         |    |    |   |   |   |   |
|         |                        |                      |          |          | 502    | 281  | 690.2604   | 281.0000 |                                                                      |                         |    |    |   |   |   |   |
| FN1285  | -1.064                 | 15.052               | 1.489e-1 | 3.973e-1 | 112    | 373  | 120.1979   | 511.0622 | AAL95481.1  SSU ribosomal protein S11P                               |                         |    |    |   |   |   |   |
|         |                        |                      |          |          | 98     | 22   | 134.7520   | 22.0000  |                                                                      |                         |    |    |   |   |   |   |
| FN1286  | 1.043                  | 12.504               | 1.179e-2 | 9.704e-3 | 118    | 41   | 126.6371   | 56.1757  | AAL95482.1  SSU ribosomal protein S13P                               |                         |    |    |   |   |   |   |
|         |                        |                      |          |          | 67     | 50   | 92.1264    | 50.0000  |                                                                      |                         |    |    |   |   |   |   |
| FN1287  | -1.375                 | 7.470                | 7.396e-2 | 1.394e-1 | 9      | 24   | 9.6588     | 32.8834  | AAL95483.1  Bacterial Protein Translation Initiation Factor 1 (IF-1) |                         |    |    |   |   |   |   |
|         |                        |                      |          |          | 5      | 10   | 6.8751     | 10.0000  |                                                                      |                         |    |    |   |   |   |   |
| FN1290  | -2.128                 | 8.949                | 9.586e-2 | 2.05e-1  | 7      | 62   | 7.5124     | 84.9487  | AAL95486.1  Hypothetical protein                                     |                         |    |    |   |   |   |   |
|         |                        |                      |          |          | 10     | 8    | 13.7502    | 8.0000   |                                                                      |                         |    |    |   |   |   |   |
| FN1293  |                        |                      |          |          |        |      |            |          | AAL95489.1  Hypothetical protein                                     |                         |    |    |   |   |   |   |
|         |                        |                      |          |          | 4      |      | 5.5001     |          |                                                                      |                         |    |    |   |   |   |   |
| FN1296  |                        |                      |          |          |        |      |            |          | AAL95492.1  unknown                                                  |                         |    |    |   |   |   |   |
|         |                        |                      |          |          | 10     |      | 10.7320    |          |                                                                      |                         |    |    |   |   |   |   |
| FN1297  | 1.292                  | 9.895                | 1.69e-3  | 5.399e-4 | 40     | 12   | 42.9278    | 16.4417  | AAL95493.1  Methionine aminopeptidase                                |                         |    |    |   |   |   |   |
|         |                        |                      |          |          | 39     | 23   | 53.6258    | 23.0000  |                                                                      |                         |    |    |   |   |   |   |

Show detected proteins only  
 Show all proteins  
 Filter by category:

Proteins found: 1305

Enter (or paste) list of ORFs

Find ORFs

Test Cutoff

q-Value

p-Value

.005

| Signif | Direction | Applies To   |
|--------|-----------|--------------|
| yes    | +         | ratios, bars |
| no     | n/a       | bars         |
| yes    | -         | ratios, bars |
| yes    | +         | p-, q-Values |
| yes    | -         | p-, q-Values |

Dot Plots

Fn Summary Table FnPg vs Fn FnSg vs Fn FnPgSg vs Fn FnPgSg vs FnPg FnSg vs FnPg FnPgSg vs FnSg Fn Coverage

| Protein | FnPgSg vs FnPg         |                      |          |          | Raw    |      | Normalized |          | Description                                                 | Log <sub>2</sub> Ratios |    |    |   |   |   |   |
|---------|------------------------|----------------------|----------|----------|--------|------|------------|----------|-------------------------------------------------------------|-------------------------|----|----|---|---|---|---|
|         | Log <sub>2</sub> Ratio | Log <sub>2</sub> Sum | q-Value  | p-Value  | FnPgSg | FnPg | FnPgSg     | FnPg     |                                                             | -6                      | -4 | -2 | 0 | 2 | 4 | 6 |
| FN1298  | 0.289                  | 12.628               | 1.183e-1 | 2.843e-1 | 64     | 62   | 68.6845    | 84.9487  | AAL95494.1  Adenylate kinase                                |                         |    |    |   |   |   |   |
|         |                        |                      |          |          | 78     | 59   | 107.2516   | 59.0000  |                                                             |                         |    |    |   |   |   |   |
| FN1299  |                        |                      |          |          |        |      |            |          | AAL95495.1  dTDP-glucose 4,6-dehydratase                    |                         |    |    |   |   |   |   |
|         |                        |                      |          |          |        | 6    |            | 6.0000   |                                                             |                         |    |    |   |   |   |   |
| FN1301  | 0.371                  | 12.414               | 1.407e-1 | 3.68e-1  | 72     | 70   | 77.2701    | 95.9098  | AAL95497.1  ABC transporter ATP-binding protein             |                         |    |    |   |   |   |   |
|         |                        |                      |          |          | 66     | 34   | 90.7514    | 34.0000  |                                                             |                         |    |    |   |   |   |   |
| FN1302  | 0.452                  | 17.786               | 1.5e-1   | 4.013e-1 | 566    | 489  | 607.4288   | 669.9984 | AAL95498.1  Hypothetical protein                            |                         |    |    |   |   |   |   |
|         |                        |                      |          |          | 367    | 143  | 504.6326   | 143.0000 |                                                             |                         |    |    |   |   |   |   |
| FN1303  | -0.130                 | 12.095               | 1.106e-1 | 2.58e-1  | 64     | 55   | 68.6845    | 75.3577  | AAL95499.1  hypothetical cytosolic protein                  |                         |    |    |   |   |   |   |
|         |                        |                      |          |          | 42     | 63   | 57.7509    | 63.0000  |                                                             |                         |    |    |   |   |   |   |
| FN1304  | 0.162                  | 14.215               | 1.013e-1 | 2.242e-1 | 145    | 83   | 155.6134   | 113.7216 | AAL95500.1  Single-strand DNA binding protein               |                         |    |    |   |   |   |   |
|         |                        |                      |          |          | 99     | 147  | 136.1271   | 147.0000 |                                                             |                         |    |    |   |   |   |   |
| FN1305  | -0.851                 | 10.558               | 1.935e-2 | 2.027e-2 | 18     | 36   | 19.3175    | 49.3250  | AAL95501.1  Hypothetical cytosolic protein                  |                         |    |    |   |   |   |   |
|         |                        |                      |          |          | 28     | 55   | 38.5006    | 55.0000  |                                                             |                         |    |    |   |   |   |   |
| FN1306  | -2.626                 | 12.326               |          |          | 23     |      | 24.6835    |          | AAL95502.1  Methyltransferase                               |                         |    |    |   |   |   |   |
|         |                        |                      |          |          | 24     | 178  | 33.0005    | 178.0000 |                                                             |                         |    |    |   |   |   |   |
| FN1309  | 1.405                  | 15.589               | 4.227e-4 | 6.75e-5  | 312    | 121  | 334.8371   | 165.7869 | AAL95505.1  Hypothetical protein                            |                         |    |    |   |   |   |   |
|         |                        |                      |          |          | 282    | 107  | 387.7558   | 107.0000 |                                                             |                         |    |    |   |   |   |   |
| FN1313  | 0.203                  | 12.132               | 1.645e-1 | 4.536e-1 | 84     | 51   | 90.1484    | 69.8771  | AAL95509.1  Oligopeptide-binding protein oppA               |                         |    |    |   |   |   |   |
|         |                        |                      |          |          | 39     | 55   | 53.6258    | 55.0000  |                                                             |                         |    |    |   |   |   |   |
| FN1317  |                        |                      |          |          |        |      |            |          | AAL95513.1  RNA polymerase sigma factor                     |                         |    |    |   |   |   |   |
|         |                        |                      |          |          |        | 12   |            | 16.4417  |                                                             |                         |    |    |   |   |   |   |
| FN1318  | 0.262                  | 9.943                | 8.204e-2 | 1.617e-1 | 32     | 17   | 34.3423    | 23.2924  | AAL95514.1  RNA polymerase sigma factor rpoD                |                         |    |    |   |   |   |   |
|         |                        |                      |          |          | 25     | 34   | 34.3755    | 34.0000  |                                                             |                         |    |    |   |   |   |   |
| FN1319  | -0.286                 | 6.298                | 7.803e-2 | 1.504e-1 | 6      | 7    | 6.4392     | 9.5910   | AAL95515.1  DNA primase                                     |                         |    |    |   |   |   |   |
|         |                        |                      |          |          | 7      | 10   | 9.6251     | 10.0000  |                                                             |                         |    |    |   |   |   |   |
| FN1320  | 0.643                  | 15.331               | 1.754e-2 | 1.772e-2 | 205    | 116  | 220.0051   | 158.9362 | AAL95516.1  Peptidyl-prolyl cis-trans isomerase             |                         |    |    |   |   |   |   |
|         |                        |                      |          |          | 209    | 166  | 287.3793   | 166.0000 |                                                             |                         |    |    |   |   |   |   |
| FN1321  | 0.032                  | 19.594               | 2.554e-1 | 8.225e-1 | 969    | 641  | 1039.9267  | 878.2596 | AAL95517.1  Acetoacetate metabolism regulatory protein atoC |                         |    |    |   |   |   |   |
|         |                        |                      |          |          | 552    | 881  | 759.0114   | 881.0000 |                                                             |                         |    |    |   |   |   |   |
| FN1322  | -2.664                 | 7.511                |          |          | 5      |      | 5.3660     |          | AAL95518.1  Membrane metalloprotease                        |                         |    |    |   |   |   |   |
|         |                        |                      |          |          |        | 34   |            | 34.0000  |                                                             |                         |    |    |   |   |   |   |

Show detected proteins only  
 Show all proteins  
 Filter by category:

Proteins found:  
1305

Test Cutoff

| Signif | Direction | Applies To   |
|--------|-----------|--------------|
| yes    | +         | ratios, bars |
| no     | n/a       | bars         |
| yes    | -         | ratios, bars |
| yes    | +         | p-, q-Values |
| yes    | -         |              |

Fn Summary Table FnPg vs Fn FnSg vs Fn FnPgSg vs Fn FnPgSg vs FnPg FnSg vs FnPg FnPgSg vs FnSg Fn Coverage

| Protein | FnPgSg vs FnPg         |                      |          |          | Raw    |      | Normalized |          | Description                                                        | Log <sub>2</sub> Ratios |    |    |   |   |   |   |
|---------|------------------------|----------------------|----------|----------|--------|------|------------|----------|--------------------------------------------------------------------|-------------------------|----|----|---|---|---|---|
|         | Log <sub>2</sub> Ratio | Log <sub>2</sub> Sum | q-Value  | p-Value  | FnPgSg | FnPg | FnPgSg     | FnPg     |                                                                    | -6                      | -4 | -2 | 0 | 2 | 4 | 6 |
| FN1323  | -0.092                 | 6.341                | 2.242e-1 | 6.929e-1 | 6      | 7    | 6.4392     | 9.5910   | AAL95519.1  Thymidylate kinase                                     |                         |    |    |   |   |   |   |
|         |                        |                      |          |          | 8      | 9    | 11.0002    | 9.0000   |                                                                    |                         |    |    |   |   |   |   |
| FN1324  | -0.778                 | 9.503                | 8.943e-2 | 1.84e-1  | 14     | 15   | 15.0247    | 20.5521  | AAL95520.1  1-deoxy-D-xylulose 5-phosphate reductoisomerase        |                         |    |    |   |   |   |   |
|         |                        |                      |          |          | 19     | 50   | 26.1254    | 50.0000  |                                                                    |                         |    |    |   |   |   |   |
| FN1326  | 0.267                  | 6.267                |          |          |        |      |            |          | AAL95522.1  Undecaprenyl pyrophosphate synthetase                  |                         |    |    |   |   |   |   |
|         |                        |                      |          |          | 7      | 8    | 9.6251     | 8.0000   |                                                                    |                         |    |    |   |   |   |   |
| FN1327  |                        |                      |          |          | 8      |      | 8.5856     |          | AAL95523.1  Dimethylallyltransferase                               |                         |    |    |   |   |   |   |
|         |                        |                      |          |          |        |      |            |          |                                                                    |                         |    |    |   |   |   |   |
| FN1328  |                        |                      |          |          | 4      |      | 4.2928     |          | AAL95524.1  Exodeoxyribonuclease VII small subunit                 |                         |    |    |   |   |   |   |
|         |                        |                      |          |          | 3      |      | 4.1251     |          |                                                                    |                         |    |    |   |   |   |   |
| FN1330  |                        |                      |          |          |        |      |            |          | AAL95526.1  S-adenosylmethionine:tRNA ribosyltransferase-isomerase |                         |    |    |   |   |   |   |
|         |                        |                      |          |          |        | 3    |            | 3.0000   |                                                                    |                         |    |    |   |   |   |   |
| FN1331  |                        |                      |          |          | 14     |      | 15.0247    |          | AAL95527.1  Methyltransferase                                      |                         |    |    |   |   |   |   |
|         |                        |                      |          |          | 4      |      | 5.5001     |          |                                                                    |                         |    |    |   |   |   |   |
| FN1332  | 0.677                  | 10.946               | 9.577e-3 | 7.052e-3 | 47     | 25   | 50.4402    | 34.2535  | AAL95528.1  Bacterial Peptide Chain Release Factor 1 (RF-1)        |                         |    |    |   |   |   |   |
|         |                        |                      |          |          | 45     | 36   | 61.8759    | 36.0000  |                                                                    |                         |    |    |   |   |   |   |
| FN1334  | -1.119                 | 8.493                |          |          | 12     | 35   | 12.8783    | 47.9549  | AAL95530.1  N-acetylmuramoyl-L-alanine amidase                     |                         |    |    |   |   |   |   |
|         |                        |                      |          |          |        | 8    |            | 8.0000   |                                                                    |                         |    |    |   |   |   |   |
| FN1335  | 1.764                  | 14.060               | 1.02e-2  | 7.791e-3 | 176    | 40   | 188.8825   | 54.8056  | AAL95531.1  Protein translocase subunit YajC                       |                         |    |    |   |   |   |   |
|         |                        |                      |          |          | 213    | 87   | 292.8794   | 87.0000  |                                                                    |                         |    |    |   |   |   |   |
| FN1336  |                        |                      |          |          |        |      |            |          | AAL95532.1  Hypothetical protein                                   |                         |    |    |   |   |   |   |
|         |                        |                      |          |          |        | 16   |            | 21.9222  |                                                                    |                         |    |    |   |   |   |   |
| FN1337  | -0.216                 | 5.590                |          |          | 6      | 8    | 6.4392     | 10.9611  | AAL95533.1  unknown                                                |                         |    |    |   |   |   |   |
|         |                        |                      |          |          |        | 4    |            | 4.0000   |                                                                    |                         |    |    |   |   |   |   |
| FN1340  | 0.565                  | 16.702               | 4.847e-2 | 7.589e-2 | 403    | 259  | 432.4979   | 354.8662 | AAL95536.1  Glutamyl-tRNA synthetase                               |                         |    |    |   |   |   |   |
|         |                        |                      |          |          | 263    | 182  | 361.6305   | 182.0000 |                                                                    |                         |    |    |   |   |   |   |
| FN1341  | 0.678                  | 7.848                |          |          | 14     |      | 15.0247    |          | AAL95537.1  Bacterial Peptide Chain Release Factor 2 (RF-2)        |                         |    |    |   |   |   |   |
|         |                        |                      |          |          | 17     | 12   | 23.3754    | 12.0000  |                                                                    |                         |    |    |   |   |   |   |
| FN1343  |                        |                      |          |          |        |      |            |          | AAL95539.1  seC-independent protein TATD                           |                         |    |    |   |   |   |   |
|         |                        |                      |          |          |        | 45   |            | 45.0000  |                                                                    |                         |    |    |   |   |   |   |
| FN1346  |                        |                      |          |          |        |      |            |          | AAL95542.1  Hypothetical cytosolic protein                         |                         |    |    |   |   |   |   |
|         |                        |                      |          |          |        | 6    |            | 6.0000   |                                                                    |                         |    |    |   |   |   |   |

Show detected proteins only  
 Show all proteins  
 Filter by category:

Proteins found: 1305

Test Cutoff

| Signif | Direction | Applies To   |
|--------|-----------|--------------|
| yes    | +         | ratios, bars |
| no     | n/a       | bars         |
| yes    | -         | ratios, bars |
| yes    | +         | p-, q-Values |
| yes    | -         | p-, q-Values |

Fn Summary Table FnPg vs Fn FnSg vs Fn FnPgSg vs Fn FnPgSg vs FnPg FnSg vs FnPg FnPgSg vs FnSg Fn Coverage

| Protein | FnPgSg vs FnPg         |                      |          |          | Raw    |      | Normalized |          | Description                                              | Log <sub>2</sub> Ratios |    |    |   |   |   |   |
|---------|------------------------|----------------------|----------|----------|--------|------|------------|----------|----------------------------------------------------------|-------------------------|----|----|---|---|---|---|
|         | Log <sub>2</sub> Ratio | Log <sub>2</sub> Sum | q-Value  | p-Value  | FnPgSg | FnPg | FnPgSg     | FnPg     |                                                          | -6                      | -4 | -2 | 0 | 2 | 4 | 6 |
| FN1347  | 0.638                  | 6.423                | 1.853e-3 | 6.23e-4  | 10     | 5    | 10.7320    | 6.8507   | AAL95543.1  Hypothetical cytosolic protein               |                         |    |    |   |   |   |   |
|         |                        |                      |          |          | 9      | 8    | 12.3752    | 8.0000   |                                                          |                         |    |    |   |   |   |   |
| FN1348  | 0.864                  | 7.845                | 1.433e-1 | 3.773e-1 | 33     | 4    | 35.4155    | 5.4806   | AAL95544.1  ABC transporter ATP-binding protein          |                         |    |    |   |   |   |   |
|         |                        |                      |          |          | 4      | 17   | 5.5001     | 17.0000  |                                                          |                         |    |    |   |   |   |   |
| FN1349  | 0.295                  | 5.909                |          |          | 8      |      | 8.5856     |          | AAL95545.1  ABC transporter permease protein             |                         |    |    |   |   |   |   |
|         |                        |                      |          |          |        | 7    |            | 7.0000   |                                                          |                         |    |    |   |   |   |   |
| FN1351  | -0.686                 | 9.966                | 2.08e-2  | 2.244e-2 | 17     | 33   | 18.2443    | 45.2146  | AAL95547.1  15 kDa lipoprotein precursor                 |                         |    |    |   |   |   |   |
|         |                        |                      |          |          |        | 23   | 35         | 31.6255  |                                                          |                         |    |    |   |   |   |   |
| FN1352  | 0.330                  | 11.495               | 1.903e-2 | 1.981e-2 | 61     | 32   | 65.4649    | 43.8445  | AAL95548.1  ABC transporter ATP-binding protein          |                         |    |    |   |   |   |   |
|         |                        |                      |          |          |        | 40   | 52         | 55.0008  |                                                          |                         |    |    |   |   |   |   |
| FN1353  | -0.427                 | 7.188                |          |          | 13     |      | 13.9515    |          | AAL95549.1  ABC transporter permease protein             |                         |    |    |   |   |   |   |
|         |                        |                      |          |          | 5      | 14   | 6.8751     | 14.0000  |                                                          |                         |    |    |   |   |   |   |
| FN1354  | -0.395                 | 9.513                |          |          | 26     |      | 27.9031    |          | AAL95550.1  ABC transporter permease protein             |                         |    |    |   |   |   |   |
|         |                        |                      |          |          | 14     | 31   | 19.2503    | 31.0000  |                                                          |                         |    |    |   |   |   |   |
| FN1355  |                        |                      |          |          | 3      |      | 3.2196     |          | AAL95551.1  Integral membrane protein                    |                         |    |    |   |   |   |   |
|         |                        |                      |          |          |        |      |            |          |                                                          |                         |    |    |   |   |   |   |
| FN1358  | -0.327                 | 10.843               |          |          | 38     |      | 40.7814    |          | AAL95554.1  Hypothetical protein                         |                         |    |    |   |   |   |   |
|         |                        |                      |          |          | 26     | 48   | 35.7505    | 48.0000  |                                                          |                         |    |    |   |   |   |   |
| FN1359  | -2.440                 | 15.548               | 5.137e-2 | 8.292e-2 | 97     | 167  | 104.1000   | 228.8134 | AAL95555.1  Dipeptide-binding protein                    |                         |    |    |   |   |   |   |
|         |                        |                      |          |          | 61     | 791  | 83.8763    | 791.0000 |                                                          |                         |    |    |   |   |   |   |
| FN1362  |                        |                      |          |          |        | 25   |            | 34.2535  | AAL95558.1  Dipeptide transport ATP-binding protein dppD |                         |    |    |   |   |   |   |
|         |                        |                      |          |          |        | 70   |            | 70.0000  |                                                          |                         |    |    |   |   |   |   |
| FN1363  | -3.037                 | 7.531                | 3.106e-2 | 4.001e-2 | 5      | 16   | 5.3660     | 21.9222  | AAL95559.1  Dipeptide transport ATP-binding protein dppF |                         |    |    |   |   |   |   |
|         |                        |                      |          |          | 3      | 56   | 4.1251     | 56.0000  |                                                          |                         |    |    |   |   |   |   |
| FN1364  | 0.510                  | 11.233               |          |          | 54     | 30   | 57.9526    | 41.1042  | AAL95560.1  LSU ribosomal protein L32P                   |                         |    |    |   |   |   |   |
|         |                        |                      |          |          | 43     |      | 59.1259    |          |                                                          |                         |    |    |   |   |   |   |
| FN1365  | 0.808                  | 14.560               | 4.973e-2 | 7.89e-2  | 186    | 43   | 199.6144   | 58.9160  | AAL95561.1  GTP-binding protein                          |                         |    |    |   |   |   |   |
|         |                        |                      |          |          | 154    | 176  | 211.7532   | 176.0000 |                                                          |                         |    |    |   |   |   |   |
| FN1366  | 1.333                  | 15.947               | 1.247e-4 | 1.386e-5 | 350    | 99   | 375.6185   | 135.6438 | AAL95562.1  Triosephosphate isomerase                    |                         |    |    |   |   |   |   |
|         |                        |                      |          |          | 307    | 181  | 422.1314   | 181.0000 |                                                          |                         |    |    |   |   |   |   |
| FN1371  |                        |                      |          |          |        |      |            |          | AAL95567.1  Ribonuclease HII                             |                         |    |    |   |   |   |   |
|         |                        |                      |          |          |        | 4    |            | 4.0000   |                                                          |                         |    |    |   |   |   |   |

Show detected proteins only  
 Show all proteins  
 Filter by category:

Proteins found: 1305

Test Cutoff

| Signif      | Direction | Applies To |
|-------------|-----------|------------|
| red         | yes       | +          |
| yellow      | no        | n/a        |
| green       | yes       | -          |
| pink        | yes       | +          |
| light green | yes       | -          |

Applies To: ratios, bars; bars; ratios, bars; p-, q-Values

| Fn Summary Table |                        | FnPg vs Fn           |          | FnSg vs Fn |        | FnPgSg vs Fn |          | FnPgSg vs FnPg |            | FnSg vs FnPg |                                                            | FnPgSg vs FnSg |                         | Fn Coverage |   |   |   |   |
|------------------|------------------------|----------------------|----------|------------|--------|--------------|----------|----------------|------------|--------------|------------------------------------------------------------|----------------|-------------------------|-------------|---|---|---|---|
| Protein          | FnPgSg vs FnPg         |                      |          |            | Raw    |              |          |                | Normalized |              |                                                            |                | Log <sub>2</sub> Ratios |             |   |   |   |   |
|                  | Log <sub>2</sub> Ratio | Log <sub>2</sub> Sum | q-Value  | p-Value    | FnPgSg | FnPg         | FnPgSg   | FnPg           | FnPgSg     | FnPg         | Description                                                | -6             | -4                      | -2          | 0 | 2 | 4 | 6 |
| FN1374           | 0.464                  | 6.079                |          |            | 9      |              | 9.6588   |                |            |              | AAL95570.1  Transcriptional regulator                      |                |                         |             |   |   |   |   |
|                  |                        |                      |          |            |        | 7            |          | 7.0000         |            |              |                                                            |                |                         |             |   |   |   |   |
| FN1375           | -1.984                 | 11.274               |          |            | 21     |              | 22.5371  |                |            |              | AAL95571.1  Citrate-sodium symport                         |                |                         |             |   |   |   |   |
|                  |                        |                      |          |            | 20     | 99           | 27.5004  | 99.0000        |            |              |                                                            |                |                         |             |   |   |   |   |
| FN1376           | -0.980                 | 17.500               | 5.701e-2 | 9.735e-2   | 319    | 282          | 342.3494 | 386.3794       |            |              | AAL95572.1  Oxaloacetate decarboxylase alpha chain         |                |                         |             |   |   |   |   |
|                  |                        |                      |          |            | 197    | 823          | 270.8791 | 823.0000       |            |              |                                                            |                |                         |             |   |   |   |   |
| FN1378           | 0.296                  | 9.334                | 2.048e-1 | 6.171e-1   | 23     | 5            | 24.6835  | 6.8507         |            |              | AAL95574.1  Citrate lyase acyl carrier protein             |                |                         |             |   |   |   |   |
|                  |                        |                      |          |            | 23     | 39           | 31.6255  | 39.0000        |            |              |                                                            |                |                         |             |   |   |   |   |
| FN1379           | -0.539                 | 15.584               | 1.748e-1 | 4.929e-1   | 185    | 60           | 198.5412 | 82.2084        |            |              | AAL95575.1  Citrate lyase beta chain                       |                |                         |             |   |   |   |   |
|                  |                        |                      |          |            | 123    | 452          | 169.1275 | 452.0000       |            |              |                                                            |                |                         |             |   |   |   |   |
| FN1380           | -0.467                 | 17.815               | 1.994e-1 | 5.936e-1   | 359    | 81           | 385.2773 | 110.9813       |            |              | AAL95576.1  Citrate lyase beta chain                       |                |                         |             |   |   |   |   |
|                  |                        |                      |          |            | 314    | 1018         | 431.7565 | 1018.0000      |            |              |                                                            |                |                         |             |   |   |   |   |
| FN1381           |                        |                      |          |            |        |              |          |                |            |              | AAL95577.1  unknown                                        |                |                         |             |   |   |   |   |
|                  |                        |                      |          |            | 3      |              | 4.1251   |                |            |              |                                                            |                |                         |             |   |   |   |   |
| FN1382           |                        |                      |          |            |        |              |          |                |            |              | AAL95578.1  ATPase                                         |                |                         |             |   |   |   |   |
|                  |                        |                      |          |            |        | 13           |          | 13.0000        |            |              |                                                            |                |                         |             |   |   |   |   |
| FN1383           | -1.428                 | 4.802                |          |            | 3      | 9            | 3.2196   | 12.3313        |            |              | AAL95579.1  DNA polymerase III alpha subunit               |                |                         |             |   |   |   |   |
|                  |                        |                      |          |            |        | 5            |          | 5.0000         |            |              |                                                            |                |                         |             |   |   |   |   |
| FN1385           |                        |                      |          |            |        |              |          |                |            |              | AAL95581.1  Hypothetical protein                           |                |                         |             |   |   |   |   |
|                  |                        |                      |          |            |        | 3            |          | 3.0000         |            |              |                                                            |                |                         |             |   |   |   |   |
| FN1386           | 0.411                  | 7.330                |          |            | 17     |              | 18.2443  |                |            |              | AAL95582.1  SWF/SNF family helicase                        |                |                         |             |   |   |   |   |
|                  |                        |                      |          |            | 8      | 11           | 11.0002  | 11.0000        |            |              |                                                            |                |                         |             |   |   |   |   |
| FN1391           | -0.221                 | 11.457               | 1.331e-1 | 3.396e-1   | 39     | 50           | 41.8546  | 68.5070        |            |              | AAL95584.1  Acetyltransferase                              |                |                         |             |   |   |   |   |
|                  |                        |                      |          |            | 41     | 46           | 56.3758  | 46.0000        |            |              |                                                            |                |                         |             |   |   |   |   |
| FN1392           | 0.468                  | 14.662               | 1.487e-1 | 3.967e-1   | 185    | 167          | 198.5412 | 228.8134       |            |              | AAL95585.1  SSU ribosomal protein S16P                     |                |                         |             |   |   |   |   |
|                  |                        |                      |          |            | 131    | 45           | 180.1277 | 45.0000        |            |              |                                                            |                |                         |             |   |   |   |   |
| FN1393           | 0.974                  | 8.961                | 3.775e-2 | 5.309e-2   | 25     | 5            | 26.8299  | 6.8507         |            |              | AAL95586.1  Signal recognition particle, subunit FFH/SRP54 |                |                         |             |   |   |   |   |
|                  |                        |                      |          |            | 26     | 25           | 35.7505  | 25.0000        |            |              |                                                            |                |                         |             |   |   |   |   |
| FN1397           | 1.005                  | 13.309               | 1.533e-2 | 1.465e-2   | 157    | 33           | 168.4917 | 45.2146        |            |              | AAL95590.1  Glutaminase                                    |                |                         |             |   |   |   |   |
|                  |                        |                      |          |            | 85     | 97           | 116.8768 | 97.0000        |            |              |                                                            |                |                         |             |   |   |   |   |
| FN1398           | 1.722                  | 13.334               | 9.724e-3 | 7.22e-3    | 171    | 16           | 183.5165 | 21.9222        |            |              | AAL95591.1  Amino acid carrier protein alsT                |                |                         |             |   |   |   |   |
|                  |                        |                      |          |            | 135    | 90           | 185.6278 | 90.0000        |            |              |                                                            |                |                         |             |   |   |   |   |

Show detected proteins only  
 Show all proteins  
 Filter by category:

Proteins found: 1305

Test Cutoff

| Signif | Direction | Applies To   |
|--------|-----------|--------------|
| yes    | +         | ratios, bars |
| no     | n/a       | bars         |
| yes    | -         | ratios, bars |
| yes    | +         | p-, q-Values |
| yes    | -         |              |

Fn Summary Table FnPg vs Fn FnSg vs Fn FnPgSg vs Fn FnPgSg vs FnPg FnSg vs FnPg FnPgSg vs FnSg Fn Coverage

| Protein | FnPgSg vs FnPg         |                      |          |          | Raw    |      |           |           | Normalized                                                 |      |        |      | Description | Log <sub>2</sub> Ratios |    |    |   |   |   |   |
|---------|------------------------|----------------------|----------|----------|--------|------|-----------|-----------|------------------------------------------------------------|------|--------|------|-------------|-------------------------|----|----|---|---|---|---|
|         | Log <sub>2</sub> Ratio | Log <sub>2</sub> Sum | q-Value  | p-Value  | FnPgSg | FnPg | FnPgSg    | FnPg      | FnPgSg                                                     | FnPg | FnPgSg | FnPg |             | -6                      | -4 | -2 | 0 | 2 | 4 | 6 |
| FN1400  | 1.437                  | 5.097                |          |          |        | 3    |           | 4.1104    |                                                            |      |        |      |             |                         |    |    |   |   |   |   |
|         |                        |                      |          |          | 7      | 3    | 9.6251    | 3.0000    | AAL95593.1  serine/threonine kinase                        |      |        |      |             |                         |    |    |   |   |   |   |
| FN1406  | -0.229                 | 11.949               | 2.214e-1 | 6.816e-1 | 48     | 22   | 51.5134   | 30.1431   |                                                            |      |        |      |             |                         |    |    |   |   |   |   |
|         |                        |                      |          |          | 47     | 106  | 64.6260   | 106.0000  | AAL95599.1  Histidine ammonia-lyase                        |      |        |      |             |                         |    |    |   |   |   |   |
| FN1407  | -0.870                 | 9.130                |          |          | 7      |      | 7.5124    |           |                                                            |      |        |      |             |                         |    |    |   |   |   |   |
|         |                        |                      |          |          | 20     | 32   | 27.5004   | 32.0000   | AAL95600.1  Glutamate formiminotransferase                 |      |        |      |             |                         |    |    |   |   |   |   |
| FN1411  | -1.075                 | 16.082               | 3.508e-2 | 4.799e-2 | 210    | 196  | 225.3711  | 268.5474  |                                                            |      |        |      |             |                         |    |    |   |   |   |   |
|         |                        |                      |          |          | 100    | 496  | 137.5021  | 496.0000  | AAL95604.1  Threonine dehydratase                          |      |        |      |             |                         |    |    |   |   |   |   |
| FN1412  |                        |                      |          |          |        | 20   |           | 27.4028   |                                                            |      |        |      |             |                         |    |    |   |   |   |   |
|         |                        |                      |          |          |        |      |           |           | AAL95605.1  5-methylthioribose kinase                      |      |        |      |             |                         |    |    |   |   |   |   |
| FN1413  | -2.089                 | 5.463                |          |          | 3      | 10   | 3.2196    | 13.7014   |                                                            |      |        |      |             |                         |    |    |   |   |   |   |
|         |                        |                      |          |          |        |      |           |           | AAL95606.1  Translation initiation factor EIF-2B subunit 1 |      |        |      |             |                         |    |    |   |   |   |   |
| FN1415  |                        |                      |          |          |        | 11   |           | 15.0715   |                                                            |      |        |      |             |                         |    |    |   |   |   |   |
|         |                        |                      |          |          |        | 7    |           | 7.0000    | AAL95608.1  NADH-dependent butanol dehydrogenase A         |      |        |      |             |                         |    |    |   |   |   |   |
| FN1416  | -2.338                 | 6.832                |          |          | 5      |      | 5.3660    |           |                                                            |      |        |      |             |                         |    |    |   |   |   |   |
|         |                        |                      |          |          | 3      | 24   | 4.1251    | 24.0000   | AAL95609.1  Transcriptional regulator, GntR family         |      |        |      |             |                         |    |    |   |   |   |   |
| FN1417  | -1.009                 | 5.856                |          |          | 5      | 7    | 5.3660    | 9.5910    |                                                            |      |        |      |             |                         |    |    |   |   |   |   |
|         |                        |                      |          |          |        | 12   |           | 12.0000   | AAL95610.1  L-fucose phosphate aldolase                    |      |        |      |             |                         |    |    |   |   |   |   |
| FN1418  |                        |                      |          |          |        | 3    |           | 4.1104    |                                                            |      |        |      |             |                         |    |    |   |   |   |   |
|         |                        |                      |          |          |        |      |           |           | AAL95611.1  Transcriptional regulator, GntR family         |      |        |      |             |                         |    |    |   |   |   |   |
| FN1419  | -1.223                 | 23.727               | 6.688e-2 | 1.213e-1 | 2312   | 6075 | 2481.2286 | 8323.5996 |                                                            |      |        |      |             |                         |    |    |   |   |   |   |
|         |                        |                      |          |          | 1743   | 3065 | 2396.6611 | 3065.0000 | AAL95612.1  Methionine gamma-lyase                         |      |        |      |             |                         |    |    |   |   |   |   |
| FN1420  | -1.344                 | 9.163                |          |          | 14     | 44   | 15.0247   | 60.2862   |                                                            |      |        |      |             |                         |    |    |   |   |   |   |
|         |                        |                      |          |          |        | 16   |           | 16.0000   | AAL95613.1  NA+/H+ antiporter NHAC                         |      |        |      |             |                         |    |    |   |   |   |   |
| FN1421  | -0.809                 | 21.378               | 7.487e-2 | 1.419e-1 | 1134   | 2193 | 1217.0040 | 3004.7167 |                                                            |      |        |      |             |                         |    |    |   |   |   |   |
|         |                        |                      |          |          | 929    | 1365 | 1277.3943 | 1365.0000 | AAL95614.1  Pyruvate-flavodoxin oxidoreductase             |      |        |      |             |                         |    |    |   |   |   |   |
| FN1423  | 1.183                  | 14.461               | 1.71e-2  | 1.712e-2 | 227    | 36   | 243.6154  | 49.3250   |                                                            |      |        |      |             |                         |    |    |   |   |   |   |
|         |                        |                      |          |          | 152    | 150  | 209.0032  | 150.0000  | AAL95616.1  Flavoprotein                                   |      |        |      |             |                         |    |    |   |   |   |   |
| FN1424  | 1.480                  | 16.056               | 1.038e-2 | 8.016e-3 | 478    | 45   | 512.9876  | 61.6563   |                                                            |      |        |      |             |                         |    |    |   |   |   |   |
|         |                        |                      |          |          | 261    | 251  | 358.8804  | 251.0000  | AAL95617.1  ACYL-COA dehydrogenase, short-chain specific   |      |        |      |             |                         |    |    |   |   |   |   |
| FN1426  | 0.252                  | 14.534               | 2.048e-1 | 6.173e-1 | 130    | 44   | 139.5154  | 60.2862   |                                                            |      |        |      |             |                         |    |    |   |   |   |   |
|         |                        |                      |          |          | 143    | 222  | 196.6280  | 222.0000  | AAL95619.1  Serine protease                                |      |        |      |             |                         |    |    |   |   |   |   |

Show detected proteins only  
 Show all proteins  
 Filter by category:

Proteins found: 1305

Enter (or paste) list of ORFs

Find ORFs

Test Cutoff

q-Value

p-Value

.005

| Signif | Direction | Applies To   |
|--------|-----------|--------------|
| yes    | +         | ratios, bars |
| no     | n/a       | bars         |
| yes    | -         | ratios, bars |
| yes    | +         | p-, q-Values |
| yes    | -         | p-, q-Values |

Dot Plots Dot Plots



Fn Summary Table FnPg vs Fn FnSg vs Fn FnPgSg vs Fn FnPgSg vs FnPg FnSg vs FnPg FnPgSg vs FnSg Fn Coverage

| Protein | FnPgSg vs FnPg         |                      |          |          | Raw    |      |          |          | Normalized                                                                          |      |        |      | Description | Log <sub>2</sub> Ratios |    |    |   |   |   |   |
|---------|------------------------|----------------------|----------|----------|--------|------|----------|----------|-------------------------------------------------------------------------------------|------|--------|------|-------------|-------------------------|----|----|---|---|---|---|
|         | Log <sub>2</sub> Ratio | Log <sub>2</sub> Sum | q-Value  | p-Value  | FnPgSg | FnPg | FnPgSg   | FnPg     | FnPgSg                                                                              | FnPg | FnPgSg | FnPg |             | -6                      | -4 | -2 | 0 | 2 | 4 | 6 |
| FN1427  | -0.744                 | 5.900                |          |          | 6      |      | 6.4392   |          | AAL95620.1  Phenazine biosynthesis protein phzF                                     |      |        |      |             |                         |    |    |   |   |   |   |
|         |                        |                      |          |          | 4      | 10   | 5.5001   | 10.0000  |                                                                                     |      |        |      |             |                         |    |    |   |   |   |   |
| FN1432  |                        |                      |          |          | 25     |      | 26.8299  |          | AAL95625.1  Leucine-, isoleucine-, valine-, threonine-, and alanine-binding protein |      |        |      |             |                         |    |    |   |   |   |   |
|         |                        |                      |          |          | 19     |      | 26.1254  |          |                                                                                     |      |        |      |             |                         |    |    |   |   |   |   |
| FN1433  | 0.278                  | 16.457               | 3.338e-2 | 4.457e-2 | 336    | 202  | 360.5938 | 276.7682 | AAL95626.1  Short chain dehydrogenase                                               |      |        |      |             |                         |    |    |   |   |   |   |
|         |                        |                      |          |          | 218    | 268  | 299.7545 | 268.0000 |                                                                                     |      |        |      |             |                         |    |    |   |   |   |   |
| FN1434  | -0.143                 | 13.211               | 2.049e-1 | 6.177e-1 | 92     | 53   | 98.7340  | 72.6174  | AAL95627.1  Tetratricopeptide repeat family protein                                 |      |        |      |             |                         |    |    |   |   |   |   |
|         |                        |                      |          |          | 63     | 132  | 86.6263  | 132.0000 |                                                                                     |      |        |      |             |                         |    |    |   |   |   |   |
| FN1437  | 0.330                  | 13.980               | 1.178e-1 | 2.828e-1 | 117    | 110  | 125.5639 | 150.7154 | AAL95630.1  LSU ribosomal protein L28P                                              |      |        |      |             |                         |    |    |   |   |   |   |
|         |                        |                      |          |          | 116    | 76   | 159.5024 | 76.0000  |                                                                                     |      |        |      |             |                         |    |    |   |   |   |   |
| FN1439  | 0.413                  | 9.460                |          |          | 34     |      | 36.4887  |          | AAL95632.1  Transcriptional regulator, DeoR family                                  |      |        |      |             |                         |    |    |   |   |   |   |
|         |                        |                      |          |          | 18     | 23   | 24.7504  | 23.0000  |                                                                                     |      |        |      |             |                         |    |    |   |   |   |   |
| FN1440  | 0.397                  | 10.717               | 1.84e-2  | 1.892e-2 | 48     | 23   | 51.5134  | 31.5132  | AAL95633.1  1-phosphofructokinase                                                   |      |        |      |             |                         |    |    |   |   |   |   |
|         |                        |                      |          |          | 31     | 40   | 42.6256  | 40.0000  |                                                                                     |      |        |      |             |                         |    |    |   |   |   |   |
| FN1441  | 1.419                  | 12.966               | 9.978e-3 | 7.52e-3  | 129    | 20   | 138.4423 | 27.4028  | AAL95634.1  PTS system, fructose-specific IIABC component                           |      |        |      |             |                         |    |    |   |   |   |   |
|         |                        |                      |          |          | 112    | 82   | 154.0023 | 82.0000  |                                                                                     |      |        |      |             |                         |    |    |   |   |   |   |
| FN1444  | -0.302                 | 17.446               | 2.514e-2 | 2.937e-2 | 375    | 374  | 402.4484 | 512.4323 | AAL95637.1  GMP synthase (glutamine-hydrolyzing)                                    |      |        |      |             |                         |    |    |   |   |   |   |
|         |                        |                      |          |          | 261    | 426  | 358.8804 | 426.0000 |                                                                                     |      |        |      |             |                         |    |    |   |   |   |   |
| FN1445  | 0.798                  | 9.316                | 9.897e-3 | 7.423e-3 | 30     | 17   | 32.1959  | 23.2924  | AAL95638.1  DNA helicase                                                            |      |        |      |             |                         |    |    |   |   |   |   |
|         |                        |                      |          |          | 25     | 15   | 34.3755  | 15.0000  |                                                                                     |      |        |      |             |                         |    |    |   |   |   |   |
| FN1449  | 1.945                  | 13.670               | 8.015e-3 | 5.339e-3 | 165    | 55   | 177.0773 | 75.3577  | AAL95642.1  Fusobacterium outer membrane protein family                             |      |        |      |             |                         |    |    |   |   |   |   |
|         |                        |                      |          |          | 197    | 41   | 270.8791 | 41.0000  |                                                                                     |      |        |      |             |                         |    |    |   |   |   |   |
| FN1450  | -0.659                 | 7.681                |          |          | 11     |      | 11.8052  |          | AAL95643.1  Integral membrane protein                                               |      |        |      |             |                         |    |    |   |   |   |   |
|         |                        |                      |          |          | 8      | 18   | 11.0002  | 18.0000  |                                                                                     |      |        |      |             |                         |    |    |   |   |   |   |
| FN1451  | -0.324                 | 14.456               | 2.679e-2 | 3.221e-2 | 110    | 120  | 118.0515 | 164.4168 | AAL95644.1  Cell division protein ftsZ                                              |      |        |      |             |                         |    |    |   |   |   |   |
|         |                        |                      |          |          | 109    | 171  | 149.8773 | 171.0000 |                                                                                     |      |        |      |             |                         |    |    |   |   |   |   |
| FN1452  | -0.652                 | 12.996               | 1.991e-2 | 2.109e-2 | 78     | 96   | 83.7093  | 131.5334 | AAL95645.1  Cell division protein ftsA                                              |      |        |      |             |                         |    |    |   |   |   |   |
|         |                        |                      |          |          | 44     | 95   | 60.5009  | 95.0000  |                                                                                     |      |        |      |             |                         |    |    |   |   |   |   |
| FN1454  | 0.400                  | 9.184                |          |          | 26     |      | 27.9031  |          | AAL95647.1  D-alanine--D-alanine ligase                                             |      |        |      |             |                         |    |    |   |   |   |   |
|         |                        |                      |          |          | 20     | 21   | 27.5004  | 21.0000  |                                                                                     |      |        |      |             |                         |    |    |   |   |   |   |
| FN1455  | -0.668                 | 8.119                | 5.658e-2 | 9.629e-2 | 8      | 19   | 8.5856   | 26.0327  | AAL95648.1  UDP-N-acetylenolpyruvoylglucosamine reductase                           |      |        |      |             |                         |    |    |   |   |   |   |
|         |                        |                      |          |          | 13     | 16   | 17.8753  | 16.0000  |                                                                                     |      |        |      |             |                         |    |    |   |   |   |   |

Show detected proteins only  
 Show all proteins  
 Filter by category:

Proteins found:  
1305

Test Cutoff

| Signif | Direction | Applies To   |
|--------|-----------|--------------|
| yes    | +         | ratios, bars |
| no     | n/a       | bars         |
| yes    | -         | ratios, bars |
| yes    | +         | p-, q-Values |
| yes    | -         | p-, q-Values |

Fn Summary Table FnPg vs Fn FnSg vs Fn FnPgSg vs Fn FnPgSg vs FnPg FnSg vs FnPg FnPgSg vs FnSg Fn Coverage

| Protein | FnPgSg vs FnPg         |                      |          |          | Raw    |      | Normalized |          | Description                                                                                     | Log <sub>2</sub> Ratios |    |    |   |   |   |   |
|---------|------------------------|----------------------|----------|----------|--------|------|------------|----------|-------------------------------------------------------------------------------------------------|-------------------------|----|----|---|---|---|---|
|         | Log <sub>2</sub> Ratio | Log <sub>2</sub> Sum | q-Value  | p-Value  | FnPgSg | FnPg | FnPgSg     | FnPg     |                                                                                                 | -6                      | -4 | -2 | 0 | 2 | 4 | 6 |
| FN1456  | -0.141                 | 11.337               | 1.179e-1 | 2.831e-1 | 39     | 40   | 41.8546    | 54.8056  | AAL95649.1  UDP-N-acetylmuramate--alanine ligase                                                |                         |    |    |   |   |   |   |
|         |                        |                      |          |          | 40     | 52   | 55.0008    | 52.0000  |                                                                                                 |                         |    |    |   |   |   |   |
| FN1457  | -0.882                 | 9.875                | 1.051e-1 | 2.38e-1  | 19     | 14   | 20.3907    | 19.1820  | AAL95650.1  UDP-N-acetylglucosamine-N-acetylmuramyl-Pentapeptide pyrophosphoryl-undecaprenol N- |                         |    |    |   |   |   |   |
|         |                        |                      |          |          | 18     | 64   | 24.7504    | 64.0000  |                                                                                                 |                         |    |    |   |   |   |   |
| FN1458  | -0.882                 | 11.745               | 8.629e-2 | 1.743e-1 | 42     | 84   | 45.0742    | 115.0917 | AAL95651.1  UDP-N-acetylmuramoylalanine--D-glutamate ligase                                     |                         |    |    |   |   |   |   |
|         |                        |                      |          |          | 30     | 44   | 41.2506    | 44.0000  |                                                                                                 |                         |    |    |   |   |   |   |
| FN1461  | -0.519                 | 9.012                | 1.223e-2 | 1.024e-2 | 20     | 20   | 21.4639    | 27.4028  | AAL95654.1  Histidinol-phosphatase                                                              |                         |    |    |   |   |   |   |
|         |                        |                      |          |          | 12     | 27   | 16.5002    | 27.0000  |                                                                                                 |                         |    |    |   |   |   |   |
| FN1463  | 0.460                  | 17.251               | 2.016e-2 | 2.146e-2 | 448    | 285  | 480.7917   | 390.4899 | AAL95656.1  pyridoxine biosynthesis protein                                                     |                         |    |    |   |   |   |   |
|         |                        |                      |          |          | 324    | 283  | 445.5067   | 283.0000 |                                                                                                 |                         |    |    |   |   |   |   |
| FN1464  | -0.614                 | 15.050               | 1.163e-1 | 2.776e-1 | 125    | 91   | 134.1495   | 124.6827 | AAL95657.1  1-deoxyxylulose-5-phosphate synthase                                                |                         |    |    |   |   |   |   |
|         |                        |                      |          |          | 119    | 331  | 163.6275   | 331.0000 |                                                                                                 |                         |    |    |   |   |   |   |
| FN1470  | 2.237                  | 10.196               | 2.787e-4 | 3.797e-5 | 63     | 15   | 67.6113    | 20.5521  | AAL95663.1  Hypothetical protein                                                                |                         |    |    |   |   |   |   |
|         |                        |                      |          |          | 59     | 11   | 81.1262    | 11.0000  |                                                                                                 |                         |    |    |   |   |   |   |
| FN1471  |                        |                      |          |          | 5      |      | 5.3660     |          | AAL95664.1  LACI-family transcription regulator                                                 |                         |    |    |   |   |   |   |
|         |                        |                      |          |          |        |      |            |          |                                                                                                 |                         |    |    |   |   |   |   |
| FN1472  | 2.046                  | 11.534               | 5.896e-3 | 3.207e-3 | 105    | 7    | 112.6856   | 9.5910   | AAL95665.1  N-acetylneuraminate-binding protein                                                 |                         |    |    |   |   |   |   |
|         |                        |                      |          |          | 79     | 44   | 108.6266   | 44.0000  |                                                                                                 |                         |    |    |   |   |   |   |
| FN1475  | 2.477                  | 10.769               | 6.392e-4 | 1.253e-4 | 103    | 20   | 110.5392   | 27.4028  | AAL95668.1  N-acetylneuraminate lyase                                                           |                         |    |    |   |   |   |   |
|         |                        |                      |          |          | 63     | 8    | 86.6263    | 8.0000   |                                                                                                 |                         |    |    |   |   |   |   |
| FN1476  |                        |                      |          |          | 11     |      | 11.8052    |          | AAL95669.1  N-acetylmannosamine-6-phosphate 2-epimerase                                         |                         |    |    |   |   |   |   |
|         |                        |                      |          |          | 9      |      | 12.3752    |          |                                                                                                 |                         |    |    |   |   |   |   |
| FN1478  | -0.894                 | 8.153                |          |          | 9      | 23   | 12.3752    | 23.0000  | AAL95671.1  Hypothetical protein                                                                |                         |    |    |   |   |   |   |
|         |                        |                      |          |          |        |      |            |          |                                                                                                 |                         |    |    |   |   |   |   |
| FN1479  | 0.090                  | 8.784                | 2.494e-1 | 7.965e-1 | 25     | 10   | 26.8299    | 13.7014  | AAL95672.1  Hypothetical protein                                                                |                         |    |    |   |   |   |   |
|         |                        |                      |          |          | 12     | 27   | 16.5002    | 27.0000  |                                                                                                 |                         |    |    |   |   |   |   |
| FN1480  | -1.480                 | 7.050                | 3.565e-3 | 1.595e-3 | 9      | 12   | 9.6588     | 16.4417  | AAL95673.1  MG2+ transporter MGTE                                                               |                         |    |    |   |   |   |   |
|         |                        |                      |          |          | 3      | 22   | 4.1251     | 22.0000  |                                                                                                 |                         |    |    |   |   |   |   |
| FN1481  | -1.722                 | 5.926                |          |          | 4      | 9    | 4.2928     | 12.3313  | AAL95674.1  Queuine tRNA-ribosyltransferase                                                     |                         |    |    |   |   |   |   |
|         |                        |                      |          |          |        | 16   |            | 16.0000  |                                                                                                 |                         |    |    |   |   |   |   |
| FN1482  | -1.516                 | 9.828                | 1.034e-4 | 8.913e-6 | 14     | 35   | 15.0247    | 47.9549  | AAL95675.1  Guanosine-3',5'-bis(Diphosphate) 3'-pyrophosphohydrolase                            |                         |    |    |   |   |   |   |
|         |                        |                      |          |          | 15     | 54   | 20.6253    | 54.0000  |                                                                                                 |                         |    |    |   |   |   |   |

Show detected proteins only  
 Show all proteins  
 Filter by category:

Proteins found: 1305

Enter (or paste) list of ORFs

Find ORFs

Test Cutoff

q-Value p-Value

.005

| Signif | Direction | Applies To   |
|--------|-----------|--------------|
| yes    | +         | ratios, bars |
| no     | n/a       | bars         |
| yes    | -         | ratios, bars |
| yes    | +         | p-, q-Values |
| yes    | -         | p-, q-Values |

Dot Plots Dot Plots

Fn Summary Table FnPg vs Fn FnSg vs Fn FnPgSg vs Fn FnPgSg vs FnPg FnSg vs FnPg FnPgSg vs FnSg Fn Coverage

| Protein | FnPgSg vs FnPg         |                      |          |          | Raw    |      | Normalized |          | Description                                                       | Log <sub>2</sub> Ratios |    |    |   |   |   |   |
|---------|------------------------|----------------------|----------|----------|--------|------|------------|----------|-------------------------------------------------------------------|-------------------------|----|----|---|---|---|---|
|         | Log <sub>2</sub> Ratio | Log <sub>2</sub> Sum | q-Value  | p-Value  | FnPgSg | FnPg | FnPgSg     | FnPg     |                                                                   | -6                      | -4 | -2 | 0 | 2 | 4 | 6 |
| FN1483  | 0.976                  | 10.717               | 9.76e-5  | 7.935e-6 | 56     | 23   | 60.0990    | 31.5132  | AAL95676.1  Adenine phosphoribosyltransferase                     |                         |    |    |   |   |   |   |
|         |                        |                      |          |          | 40     | 27   | 55.0008    | 27.0000  |                                                                   |                         |    |    |   |   |   |   |
| FN1484  |                        |                      |          |          | 8      |      | 8.5856     |          | AAL95677.1  Tetratricopeptide repeat family protein               |                         |    |    |   |   |   |   |
|         |                        |                      |          |          | 5      |      | 6.8751     |          |                                                                   |                         |    |    |   |   |   |   |
| FN1486  |                        |                      |          |          | 5      |      | 5.3660     |          | AAL95679.1  magnesium and cobalt efflux protein CorC              |                         |    |    |   |   |   |   |
|         |                        |                      |          |          | 3      |      | 4.1251     |          |                                                                   |                         |    |    |   |   |   |   |
| FN1487  | 0.896                  | 14.076               | 2.117e-2 | 2.301e-2 | 197    | 45   | 211.4196   | 61.6563  | AAL95681.1  Chorismate mutase                                     |                         |    |    |   |   |   |   |
|         |                        |                      |          |          | 107    | 131  | 147.1272   | 131.0000 |                                                                   |                         |    |    |   |   |   |   |
| FN1488  | -0.722                 | 8.073                | 9.775e-2 | 2.114e-1 | 11     | 22   | 11.8052    | 30.1431  | AAL95682.1  Methylenetetrahydrofolate dehydrogenase (NADP+)       |                         |    |    |   |   |   |   |
|         |                        |                      |          |          | 10     | 12   | 13.7502    | 12.0000  |                                                                   |                         |    |    |   |   |   |   |
| FN1489  | -1.192                 | 7.310                | 1.698e-2 | 1.695e-2 | 4      | 11   | 4.2928     | 15.0715  | AAL95683.1  Methionyl-tRNA formyltransferase                      |                         |    |    |   |   |   |   |
|         |                        |                      |          |          | 9      | 23   | 12.3752    | 23.0000  |                                                                   |                         |    |    |   |   |   |   |
| FN1490  | -1.192                 | 7.011                |          |          | 7      | 9    | 7.5124     | 12.3313  | AAL95684.1  putative regulatory protein                           |                         |    |    |   |   |   |   |
|         |                        |                      |          |          |        | 22   |            | 22.0000  |                                                                   |                         |    |    |   |   |   |   |
| FN1491  |                        |                      |          |          |        |      |            |          | AAL95685.1  PTS system, IIA component                             |                         |    |    |   |   |   |   |
|         |                        |                      |          |          |        | 10   |            | 10.0000  |                                                                   |                         |    |    |   |   |   |   |
| FN1493  |                        |                      |          |          |        |      |            | 9.5910   | AAL95687.1  Hypothetical protein                                  |                         |    |    |   |   |   |   |
|         |                        |                      |          |          |        | 12   |            | 12.0000  |                                                                   |                         |    |    |   |   |   |   |
| FN1494  | 0.525                  | 7.169                |          |          | 14     |      | 15.0247    |          | AAL95680.1  Rod shape-determining protein mreC                    |                         |    |    |   |   |   |   |
|         |                        |                      |          |          | 10     | 10   | 13.7502    | 10.0000  |                                                                   |                         |    |    |   |   |   |   |
| FN1496  | 0.525                  | 7.169                |          |          | 14     |      | 15.0247    |          | AAL95680.1  Rod shape-determining protein mreC                    |                         |    |    |   |   |   |   |
|         |                        |                      |          |          | 10     | 10   | 13.7502    | 10.0000  |                                                                   |                         |    |    |   |   |   |   |
| FN1499  | 1.149                  | 12.680               | 3.316e-2 | 4.413e-2 | 98     | 13   | 105.1732   | 17.8118  | AAL93625.1  Cell surface protein                                  |                         |    |    |   |   |   |   |
|         |                        |                      |          |          | 99     | 91   | 136.1271   | 91.0000  |                                                                   |                         |    |    |   |   |   |   |
| FN1501  |                        |                      |          |          |        |      |            |          | AAL93627.1  Nickel transport ATP-binding protein nikD             |                         |    |    |   |   |   |   |
|         |                        |                      |          |          | 3      |      | 4.1251     |          |                                                                   |                         |    |    |   |   |   |   |
| FN1504  | 0.693                  | 12.929               | 7.972e-3 | 5.287e-3 | 117    | 43   | 125.5639   | 58.9160  | AAL93630.1  Nickel-binding protein                                |                         |    |    |   |   |   |   |
|         |                        |                      |          |          | 72     | 80   | 99.0015    | 80.0000  |                                                                   |                         |    |    |   |   |   |   |
| FN1505  | -0.756                 | 15.444               | 1.474e-2 | 1.372e-2 | 158    | 172  | 169.5649   | 235.6641 | AAL93631.1  6,7-dimethyl-8-ribityllumazine synthase               |                         |    |    |   |   |   |   |
|         |                        |                      |          |          | 113    | 313  | 155.3773   | 313.0000 |                                                                   |                         |    |    |   |   |   |   |
| FN1506  | 0.033                  | 8.606                | 2.755e-1 | 9.117e-1 | 18     | 19   | 19.3175    | 26.0327  | AAL93632.1  Diaminohydroxyphosphoribosylaminopyrimidine deaminase |                         |    |    |   |   |   |   |
|         |                        |                      |          |          | 15     | 13   | 20.6253    | 13.0000  |                                                                   |                         |    |    |   |   |   |   |

Show detected proteins only  
 Show all proteins  
 Filter by category:

Proteins found: 1305

Test Cutoff

| Signif | Direction | Applies To   |
|--------|-----------|--------------|
| yes    | +         | ratios, bars |
| no     | n/a       | bars         |
| yes    | -         | ratios, bars |
| yes    | +         | p-, q-Values |
| yes    | -         |              |

Fn Summary Table FnPg vs Fn FnSg vs Fn FnPgSg vs Fn FnPgSg vs FnPg FnSg vs FnPg FnPgSg vs FnSg Fn Coverage

| Protein | FnPgSg vs FnPg         |                      |          |          | Raw    |      | Normalized |           | Description                                                    | Log <sub>2</sub> Ratios |    |    |   |   |   |   |
|---------|------------------------|----------------------|----------|----------|--------|------|------------|-----------|----------------------------------------------------------------|-------------------------|----|----|---|---|---|---|
|         | Log <sub>2</sub> Ratio | Log <sub>2</sub> Sum | q-Value  | p-Value  | FnPgSg | FnPg | FnPgSg     | FnPg      |                                                                | -6                      | -4 | -2 | 0 | 2 | 4 | 6 |
| FN1508  | 0.397                  | 13.751               | 7.947e-2 | 1.544e-1 | 123    | 53   | 132.0031   | 72.6174   | AAL93634.1  GTP cyclohydrolase II                              |                         |    |    |   |   |   |   |
|         |                        |                      |          |          | 100    | 132  | 137.5021   | 132.0000  |                                                                |                         |    |    |   |   |   |   |
| FN1512  |                        |                      |          |          | 3      |      | 3.2196     |           | AAL93638.1  hypothetical exported 24-amino acid repeat protein |                         |    |    |   |   |   |   |
|         |                        |                      |          |          | 3      |      | 4.1251     |           |                                                                |                         |    |    |   |   |   |   |
| FN1517  | 0.306                  | 15.584               | 1.128e-1 | 2.654e-1 | 235    | 102  | 252.2010   | 139.7543  | AAL93643.1  Leucyl-tRNA synthetase                             |                         |    |    |   |   |   |   |
|         |                        |                      |          |          | 175    | 259  | 240.6286   | 259.0000  |                                                                |                         |    |    |   |   |   |   |
| FN1519  | 0.904                  | 8.305                |          |          | 21     |      | 22.5371    |           | AAL93645.1  23S rRNA methyltransferase                         |                         |    |    |   |   |   |   |
|         |                        |                      |          |          | 19     | 13   | 26.1254    | 13.0000   |                                                                |                         |    |    |   |   |   |   |
| FN1520  | 1.973                  | 11.802               | 1.938e-3 | 6.702e-4 | 122    | 9    | 130.9299   | 12.3313   | AAL93646.1  UDP-N-acetylglucosamine 1-carboxyvinyltransferase  |                         |    |    |   |   |   |   |
|         |                        |                      |          |          | 77     | 48   | 105.8766   | 48.0000   |                                                                |                         |    |    |   |   |   |   |
| FN1523  | 1.503                  | 14.521               | 7.781e-4 | 1.643e-4 | 253    | 68   | 271.5185   | 93.1695   | AAL93649.1  Dipeptide-binding protein                          |                         |    |    |   |   |   |   |
|         |                        |                      |          |          | 178    | 89   | 244.7537   | 89.0000   |                                                                |                         |    |    |   |   |   |   |
| FN1525  |                        |                      |          |          |        |      |            |           | AAL93651.1  Dipeptide transport ATP-binding protein dppF       |                         |    |    |   |   |   |   |
|         |                        |                      |          |          | 6      |      | 8.2501     |           |                                                                |                         |    |    |   |   |   |   |
| FN1526  | -0.286                 | 21.917               | 2.052e-1 | 6.188e-1 | 1491   | 2501 | 1600.1349  | 3426.7198 | AAL93652.1  Fusobacterium outer membrane protein family        |                         |    |    |   |   |   |   |
|         |                        |                      |          |          | 1457   | 968  | 2003.4052  | 968.0000  |                                                                |                         |    |    |   |   |   |   |
| FN1527  | 1.938                  | 11.812               | 2.33e-3  | 8.551e-4 | 97     | 25   | 104.1000   | 34.2535   | AAL93653.1  Hypothetical protein                               |                         |    |    |   |   |   |   |
|         |                        |                      |          |          | 95     | 27   | 130.6270   | 27.0000   |                                                                |                         |    |    |   |   |   |   |
| FN1528  | 1.037                  | 12.554               | 1.318e-2 | 1.148e-2 | 84     | 52   | 90.1484    | 71.2473   | AAL93654.1  Hypothetical protein                               |                         |    |    |   |   |   |   |
|         |                        |                      |          |          | 96     | 37   | 132.0020   | 37.0000   |                                                                |                         |    |    |   |   |   |   |
| FN1529  | 0.058                  | 12.459               | 2.761e-1 | 9.146e-1 | 53     | 84   | 56.8794    | 115.0917  | AAL93655.1  Hypothetical protein                               |                         |    |    |   |   |   |   |
|         |                        |                      |          |          | 70     | 32   | 96.2515    | 32.0000   |                                                                |                         |    |    |   |   |   |   |
| FN1531  | 0.554                  | 10.667               | 9.789e-2 | 2.119e-1 | 59     | 15   | 63.3185    | 20.5521   | AAL93657.1  murein hydrolase export regulator                  |                         |    |    |   |   |   |   |
|         |                        |                      |          |          | 25     | 46   | 34.3755    | 46.0000   |                                                                |                         |    |    |   |   |   |   |
| FN1533  | -0.141                 | 19.382               | 2.545e-1 | 8.186e-1 | 744    | 1043 | 798.4576   | 1429.0559 | AAL93659.1  Electron transfer flavoprotein alpha-subunit       |                         |    |    |   |   |   |   |
|         |                        |                      |          |          | 564    | 307  | 775.5117   | 307.0000  |                                                                |                         |    |    |   |   |   |   |
| FN1534  | -0.628                 | 20.216               | 1.251e-1 | 3.091e-1 | 868    | 1502 | 931.5339   | 2057.9500 | AAL93660.1  Electron transfer flavoprotein beta-subunit        |                         |    |    |   |   |   |   |
|         |                        |                      |          |          | 614    | 686  | 844.2627   | 686.0000  |                                                                |                         |    |    |   |   |   |   |
| FN1535  | -0.790                 | 21.547               | 1.079e-2 | 8.541e-3 | 1208   | 1883 | 1296.4205  | 2579.9733 | AAL93661.1  Acyl-CoA dehydrogenase, short-chain specific       |                         |    |    |   |   |   |   |
|         |                        |                      |          |          | 993    | 2023 | 1365.3956  | 2023.0000 |                                                                |                         |    |    |   |   |   |   |
| FN1536  | -1.310                 | 19.626               | 6.391e-3 | 3.632e-3 | 539    | 905  | 578.4525   | 1239.9766 | AAL93662.1  (S)-2-hydroxy-acid oxidase chain D                 |                         |    |    |   |   |   |   |
|         |                        |                      |          |          | 410    | 1593 | 563.7585   | 1593.0000 |                                                                |                         |    |    |   |   |   |   |

Show detected proteins only  
 Show all proteins  
 Filter by category:

Proteins found:  
1305

Test Cutoff

| Signif | Direction | Applies To   |
|--------|-----------|--------------|
| yes    | +         | ratios, bars |
| no     | n/a       | bars         |
| yes    | -         | ratios, bars |
| yes    | +         | p-, q-Values |
| yes    | -         |              |

Fn Summary Table FnPg vs Fn FnSg vs Fn FnPgSg vs Fn FnPgSg vs FnPg FnSg vs FnPg FnPgSg vs FnSg Fn Coverage

| Protein | FnPgSg vs FnPg         |                      |          |          | Raw    |      |           |           | Normalized |      |                                                                                 |      | Description | Log <sub>2</sub> Ratios |    |    |   |   |   |   |
|---------|------------------------|----------------------|----------|----------|--------|------|-----------|-----------|------------|------|---------------------------------------------------------------------------------|------|-------------|-------------------------|----|----|---|---|---|---|
|         | Log <sub>2</sub> Ratio | Log <sub>2</sub> Sum | q-Value  | p-Value  | FnPgSg | FnPg | FnPgSg    | FnPg      | FnPgSg     | FnPg | FnPgSg                                                                          | FnPg |             | -6                      | -4 | -2 | 0 | 2 | 4 | 6 |
| FN1537  |                        |                      |          |          |        | 4    |           | 5.4806    |            |      | AAL93663.1  Arsenical pump-driving ATPase                                       |      |             |                         |    |    |   |   |   |   |
| FN1538  | -0.584                 | 7.128                |          |          | 9      | 8    | 9.6588    | 10.9611   |            |      | AAL93664.1  Arsenical pump-driving ATPase                                       |      |             |                         |    |    |   |   |   |   |
| FN1539  | -0.510                 | 15.676               | 6.401e-2 | 1.143e-1 | 187    | 246  | 200.6876  | 337.0544  |            |      | AAL93665.1  Iron-sulfur cluster-binding protein                                 |      |             |                         |    |    |   |   |   |   |
| FN1540  | -1.799                 | 16.108               | 1.516e-2 | 1.439e-2 | 122    | 450  | 130.9299  | 616.5629  |            |      | AAL93666.1  Iron-sulfur cluster-binding protein                                 |      |             |                         |    |    |   |   |   |   |
| FN1544  | -1.944                 | 17.036               | 4.389e-2 | 6.559e-2 | 156    | 762  | 167.4185  | 1044.0466 |            |      | AAL93670.1  Probable electron transfer flavoprotein-quinone oxidoreductase ydiS |      |             |                         |    |    |   |   |   |   |
| FN1545  | -2.497                 | 11.678               | 7.813e-2 | 1.507e-1 | 18     | 173  | 19.3175   | 237.0342  |            |      | AAL93671.1  Ferredoxin like protein                                             |      |             |                         |    |    |   |   |   |   |
| FN1546  | -0.465                 | 21.417               | 1.501e-1 | 4.019e-1 | 1330   | 2138 | 1427.3504 | 2929.3590 |            |      | AAL93672.1  Protein Translation Elongation Factor G (EF-G)                      |      |             |                         |    |    |   |   |   |   |
| FN1547  | 0.404                  | 14.279               | 2.769e-2 | 3.382e-2 | 151    | 76   | 162.0526  | 104.1306  |            |      | AAL93673.1  PTS permease for N-acetylglucosamine and glucose                    |      |             |                         |    |    |   |   |   |   |
| FN1548  | 0.967                  | 10.518               | 3.4e-2   | 4.586e-2 | 37     | 21   | 39.7082   | 28.7729   |            |      | AAL93674.1  Hypothetical protein                                                |      |             |                         |    |    |   |   |   |   |
| FN1549  | 0.945                  | 19.354               | 1.889e-3 | 6.427e-4 | 1019   | 362  | 1093.5865 | 495.9906  |            |      | AAL93675.1  Stomatin like protein                                               |      |             |                         |    |    |   |   |   |   |
| FN1552  |                        |                      |          |          |        | 4    |           | 4.0000    |            |      | AAL93678.1  abortive phage resistance protein                                   |      |             |                         |    |    |   |   |   |   |
| FN1553  | 1.083                  | 7.862                | 2.959e-2 | 3.729e-2 | 26     | 8    | 27.9031   | 10.9611   |            |      | AAL93679.1  abortive phage resistance protein                                   |      |             |                         |    |    |   |   |   |   |
| FN1554  | -0.065                 | 15.787               | 2.053e-1 | 6.193e-1 | 195    | 158  | 209.2732  | 216.4821  |            |      | AAL93680.1  Fusobacterium outer membrane protein family                         |      |             |                         |    |    |   |   |   |   |
| FN1555  | 0.590                  | 24.162               | 3.299e-5 | 1.409e-6 | 5050   | 2528 | 5419.6386 | 3463.7135 |            |      | AAL93681.1  Protein Translation Elongation Factor Tu                            |      |             |                         |    |    |   |   |   |   |
| FN1556  | 1.026                  | 20.209               | 1.398e-4 | 1.616e-5 | 1392   | 621  | 1493.8885 | 850.8568  |            |      | AAL93682.1  Protein Translation Elongation Factor G (EF-G)                      |      |             |                         |    |    |   |   |   |   |
| FN1557  | 1.182                  | 16.033               | 9.898e-4 | 2.369e-4 | 381    | 124  | 408.8876  | 169.8973  |            |      | AAL93683.1  SSU ribosomal protein S7P                                           |      |             |                         |    |    |   |   |   |   |

Show detected proteins only  
 Show all proteins  
 Filter by category:

Proteins found: 1305

Enter (or paste) list of ORFs

Find ORFs

Test Cutoff

q-Value p-Value

.005

| Signif | Direction | Applies To   |
|--------|-----------|--------------|
| yes    | +         | ratios, bars |
| no     | n/a       | bars         |
| yes    | -         | ratios, bars |
| yes    | +         | p-, q-Values |
| yes    | -         | p-, q-Values |

Dot Plots Dot Plots

| Fn Summary Table |                        | FnPg vs Fn           |          | FnSg vs Fn |        | FnPgSg vs Fn |          | FnPgSg vs FnPg |            | FnSg vs FnPg |                                                                  | FnPgSg vs FnSg |                         | Fn Coverage |   |   |   |   |
|------------------|------------------------|----------------------|----------|------------|--------|--------------|----------|----------------|------------|--------------|------------------------------------------------------------------|----------------|-------------------------|-------------|---|---|---|---|
| Protein          | FnPgSg vs FnPg         |                      |          |            | Raw    |              |          |                | Normalized |              |                                                                  |                | Log <sub>2</sub> Ratios |             |   |   |   |   |
|                  | Log <sub>2</sub> Ratio | Log <sub>2</sub> Sum | q-Value  | p-Value    | FnPgSg | FnPg         | FnPgSg   | FnPg           | FnPgSg     | FnPg         | Description                                                      | -6             | -4                      | -2          | 0 | 2 | 4 | 6 |
| FN1558           | 0.138                  | 13.531               |          |            |        | 128          |          | 175.3779       |            |              | AAL93684.1  SSU ribosomal protein S12P                           |                |                         |             |   |   |   |   |
|                  |                        |                      |          |            |        | 83           | 32       | 114.1267       | 32.0000    |              |                                                                  |                |                         |             |   |   |   |   |
| FN1560           | -0.096                 | 13.297               | 2.736e-1 | 9.028e-1   | 86     | 12           | 92.2948  | 16.4417        |            |              | AAL93686.1  unknown                                              |                |                         |             |   |   |   |   |
|                  |                        |                      |          |            |        | 74           | 191      | 101.7515       | 191.0000   |              |                                                                  |                |                         |             |   |   |   |   |
| FN1562           | -0.395                 | 5.243                |          |            | 5      | 3            | 5.3660   | 4.1104         |            |              | AAL93688.1  Phospho-2-dehydro-3-deoxyheptonate aldolase          |                |                         |             |   |   |   |   |
|                  |                        |                      |          |            |        |              | 10       | 10.0000        |            |              |                                                                  |                |                         |             |   |   |   |   |
| FN1577           | -0.517                 | 15.208               | 1.011e-1 | 2.234e-1   | 152    | 112          | 163.1258 | 153.4557       |            |              | AAL93692.1  Rod shape-determining protein mreB                   |                |                         |             |   |   |   |   |
|                  |                        |                      |          |            |        | 118          | 312      | 162.2524       | 312.0000   |              |                                                                  |                |                         |             |   |   |   |   |
| FN1579           | -0.425                 | 12.341               | 1.029e-1 | 2.3e-1     | 62     | 43           | 66.5381  | 58.9160        |            |              | AAL93694.1  Cysteinyl-tRNA synthetase                            |                |                         |             |   |   |   |   |
|                  |                        |                      |          |            |        | 42           | 108      | 57.7509        | 108.0000   |              |                                                                  |                |                         |             |   |   |   |   |
| FN1581           | -0.035                 | 10.214               | 2.59e-1  | 8.38e-1    | 34     | 21           | 36.4887  | 28.7729        |            |              | AAL93696.1  DNA mismatch repair protein mutS                     |                |                         |             |   |   |   |   |
|                  |                        |                      |          |            |        | 23           | 41       | 31.6255        | 41.0000    |              |                                                                  |                |                         |             |   |   |   |   |
| FN1582           |                        |                      |          |            |        |              |          |                |            |              | AAL93697.1  Hypothetical protein                                 |                |                         |             |   |   |   |   |
|                  |                        |                      |          |            |        |              | 22       | 22.0000        |            |              |                                                                  |                |                         |             |   |   |   |   |
| FN1586           |                        |                      |          |            |        |              |          |                |            |              | AAL93701.1  O-succinylbenzoate-CoA synthase                      |                |                         |             |   |   |   |   |
|                  |                        |                      |          |            |        |              | 18       | 18.0000        |            |              |                                                                  |                |                         |             |   |   |   |   |
| FN1589           | 0.495                  | 8.389                | 1.205e-1 | 2.925e-1   | 20     | 5            | 21.4639  | 6.8507         |            |              | AAL93704.1  LexA repressor                                       |                |                         |             |   |   |   |   |
|                  |                        |                      |          |            |        | 16           | 24       | 22.0003        | 24.0000    |              |                                                                  |                |                         |             |   |   |   |   |
| FN1590           |                        |                      |          |            |        |              |          |                |            |              | AAL93705.1  Hypothetical lipoprotein                             |                |                         |             |   |   |   |   |
|                  |                        |                      |          |            |        |              | 5        | 5.0000         |            |              |                                                                  |                |                         |             |   |   |   |   |
| FN1591           | 0.431                  | 15.252               | 1.435e-2 | 1.313e-2   | 202    | 141          | 216.7855 | 193.1897       |            |              | AAL93706.1  RNFB-related protein                                 |                |                         |             |   |   |   |   |
|                  |                        |                      |          |            |        | 176          | 147      | 242.0036       | 147.0000   |              |                                                                  |                |                         |             |   |   |   |   |
| FN1592           | 0.344                  | 7.745                |          |            |        |              |          |                |            |              | AAL93707.1  Na(+)-translocating NADH-quinone reductase subunit D |                |                         |             |   |   |   |   |
|                  |                        |                      |          |            |        | 12           | 13       | 16.5002        | 13.0000    |              |                                                                  |                |                         |             |   |   |   |   |
| FN1594           | 1.334                  | 11.910               | 2.603e-3 | 9.967e-4   | 90     | 22           | 96.5876  | 30.1431        |            |              | AAL93709.1  Nitrogen fixation protein RNFG                       |                |                         |             |   |   |   |   |
|                  |                        |                      |          |            |        | 73           | 48       | 100.3765       | 48.0000    |              |                                                                  |                |                         |             |   |   |   |   |
| FN1595           | 0.361                  | 14.681               | 1.798e-1 | 5.125e-1   | 177    | 35           | 189.9556 | 47.9549        |            |              | AAL93710.1  Na(+)-translocating NADH-quinone reductase subunit B |                |                         |             |   |   |   |   |
|                  |                        |                      |          |            |        | 129          | 238      | 177.3777       | 238.0000   |              |                                                                  |                |                         |             |   |   |   |   |
| FN1596           | 0.350                  | 19.226               | 1.36e-1  | 3.515e-1   | 748    | 722          | 802.7504 | 989.2410       |            |              | AAL93711.1  Nitrogen fixation iron-sulphur protein RNFC          |                |                         |             |   |   |   |   |
|                  |                        |                      |          |            |        | 702          | 398      | 965.2646       | 398.0000   |              |                                                                  |                |                         |             |   |   |   |   |
| FN1597           | -2.674                 | 6.878                |          |            | 4      | 20           | 4.2928   | 27.4028        |            |              | AAL93712.1  Peptidyl-tRNA hydrolase                              |                |                         |             |   |   |   |   |
|                  |                        |                      |          |            |        |              |          |                |            |              |                                                                  |                |                         |             |   |   |   |   |

Show detected proteins only  
 Show all proteins  
 Filter by category:

Proteins found: 1305

Enter (or paste) list of ORFs

Find ORFs

Test Cutoff

q-Value

p-Value

.005

| Signif | Direction | Applies To   |
|--------|-----------|--------------|
| yes    | +         | ratios, bars |
| no     | n/a       | bars         |
| yes    | -         | ratios, bars |
| yes    | +         | p-, q-Values |
| yes    | -         | p-, q-Values |

Dot Plots Dot Plots

Fn Summary Table FnPg vs Fn FnSg vs Fn FnPgSg vs Fn FnPgSg vs FnPg FnSg vs FnPg FnPgSg vs FnSg Fn Coverage

| Protein | FnPgSg vs FnPg         |                      |          |          | Raw    |      |           |           | Normalized |      |        |      | Description                                              | Log <sub>2</sub> Ratios |    |    |   |   |   |   |
|---------|------------------------|----------------------|----------|----------|--------|------|-----------|-----------|------------|------|--------|------|----------------------------------------------------------|-------------------------|----|----|---|---|---|---|
|         | Log <sub>2</sub> Ratio | Log <sub>2</sub> Sum | q-Value  | p-Value  | FnPgSg | FnPg | FnPgSg    | FnPg      | FnPgSg     | FnPg | FnPgSg | FnPg |                                                          | -6                      | -4 | -2 | 0 | 2 | 4 | 6 |
| FN1600  |                        |                      |          |          |        | 11   |           | 11.0000   |            |      |        |      | AAL93715.1  tRNA pseudouridine synthase A                |                         |    |    |   |   |   |   |
| FN1602  |                        |                      |          |          | 4      |      | 5.5001    |           |            |      |        |      | AAL93717.1  Hypothetical cytosolic protein               |                         |    |    |   |   |   |   |
| FN1603  | 0.345                  | 5.253                |          |          | 4      | 4    | 4.2928    | 5.4806    |            |      |        |      | AAL93718.1  2',3'-cyclic nucleotide 3'-phosphodiesterase |                         |    |    |   |   |   |   |
| FN1605  | -0.233                 | 16.203               | 1.305e-1 | 3.296e-1 | 239    | 169  | 256.4938  | 231.5536  |            |      |        |      | AAL93720.1  Adenylosuccinate synthetase                  |                         |    |    |   |   |   |   |
| FN1606  | -0.294                 | 8.179                | 1.352e-1 | 3.481e-1 | 12     | 10   | 12.8783   | 13.7014   |            |      |        |      | AAL93721.1  3-deoxy-D-manno-octulosonic-acid transferase |                         |    |    |   |   |   |   |
| FN1607  | -0.673                 | 7.592                |          |          |        | 11   |           | 15.0715   |            |      |        |      | AAL93722.1  Cytidylate kinase                            |                         |    |    |   |   |   |   |
| FN1608  |                        |                      |          |          |        | 8    |           | 8.0000    |            |      |        |      | AAL93723.1  Ribosomal protein L11 methyltransferase      |                         |    |    |   |   |   |   |
| FN1609  | -1.483                 | 5.687                |          |          | 4      |      | 4.2928    |           |            |      |        |      | AAL93724.1  Hypothetical protein                         |                         |    |    |   |   |   |   |
| FN1610  | -1.511                 | 9.013                | 3.332e-5 | 1.433e-6 | 11     | 29   | 11.8052   | 39.7341   |            |      |        |      | AAL93725.1  33 kDa chaperonin                            |                         |    |    |   |   |   |   |
| FN1613  | 0.062                  | 8.599                | 1.88e-1  | 5.455e-1 | 17     | 15   | 18.2443   | 20.5521   |            |      |        |      | AAL93728.1  Hypothetical protein                         |                         |    |    |   |   |   |   |
| FN1614  | -0.524                 | 9.186                | 2.064e-2 | 2.22e-2  | 17     | 24   | 18.2443   | 32.8834   |            |      |        |      | AAL93729.1  MG(2+) chelatase family protein              |                         |    |    |   |   |   |   |
| FN1616  | 1.848                  | 9.848                |          |          | 74     |      | 79.4165   |           |            |      |        |      | AAL93731.1  N utilization substance protein B            |                         |    |    |   |   |   |   |
| FN1618  | 0.500                  | 10.812               | 6.944e-2 | 1.277e-1 | 44     | 17   | 47.2206   | 23.2924   |            |      |        |      | AAL93733.1  Hypothetical protein                         |                         |    |    |   |   |   |   |
| FN1619  | 0.725                  | 16.205               | 1.195e-2 | 9.897e-3 | 282    | 134  | 302.6412  | 183.5987  |            |      |        |      | AAL93734.1  Hypothetical cytosolic protein               |                         |    |    |   |   |   |   |
| FN1620  | 0.500                  | 18.254               | 7.539e-2 | 1.433e-1 | 624    | 468  | 669.6741  | 641.2254  |            |      |        |      | AAL93735.1  SSU ribosomal protein S2P                    |                         |    |    |   |   |   |   |
| FN1621  | 0.551                  | 20.474               | 3.868e-2 | 5.494e-2 | 1181   | 923  | 1267.4442 | 1264.6391 |            |      |        |      | AAL93736.1  Protein Translation Elongation Factor Ts     |                         |    |    |   |   |   |   |

Show detected proteins only  
 Show all proteins  
 Filter by category:

Proteins found: 1305

Enter (or paste) list of ORFs

Find ORFs

Test Cutoff

q-Value

p-Value

.005

| Signif | Direction | Applies To   |
|--------|-----------|--------------|
| yes    | +         | ratios, bars |
| no     | n/a       | bars         |
| yes    | -         | ratios, bars |
| yes    | +         | p-, q-Values |
| yes    | -         | p-, q-Values |

Dot Plots Dot Plots

Fn Summary Table FnPg vs Fn FnSg vs Fn FnPgSg vs Fn FnPgSg vs FnPg FnSg vs FnPg FnPgSg vs FnSg Fn Coverage

| Protein | FnPgSg vs FnPg         |                      |          |          | Raw    |      | Normalized |          | Description                                  | Log <sub>2</sub> Ratios |    |    |   |   |   |   |
|---------|------------------------|----------------------|----------|----------|--------|------|------------|----------|----------------------------------------------|-------------------------|----|----|---|---|---|---|
|         | Log <sub>2</sub> Ratio | Log <sub>2</sub> Sum | q-Value  | p-Value  | FnPgSg | FnPg | FnPgSg     | FnPg     |                                              | -6                      | -4 | -2 | 0 | 2 | 4 | 6 |
| FN1622  | 1.232                  | 14.365               | 1.129e-3 | 2.962e-4 | 224    | 53   | 240.3958   | 72.6174  | AAL93737.1  Uridylate kinase                 |                         |    |    |   |   |   |   |
|         |                        |                      |          |          | 149    | 117  | 204.8781   | 117.0000 |                                              |                         |    |    |   |   |   |   |
| FN1623  | 0.982                  | 11.407               | 3.319e-3 | 1.433e-3 | 66     | 22   | 70.8309    | 30.1431  | AAL93738.1  Ribosome Recycling Factor (RRF)  |                         |    |    |   |   |   |   |
|         |                        |                      |          |          | 55     | 44   | 75.6261    | 44.0000  |                                              |                         |    |    |   |   |   |   |
| FN1624  | 1.666                  | 10.584               |          |          | 66     |      | 70.8309    |          | AAL93739.1  Protein translocase subunit secY |                         |    |    |   |   |   |   |
|         |                        |                      |          |          | 50     | 22   | 68.7510    | 22.0000  |                                              |                         |    |    |   |   |   |   |
| FN1625  | 0.625                  | 13.277               | 6.993e-2 | 1.29e-1  | 114    | 85   | 122.3443   | 116.4619 | AAL93740.1  LSU ribosomal protein L15P       |                         |    |    |   |   |   |   |
|         |                        |                      |          |          | 91     | 44   | 125.1269   | 44.0000  |                                              |                         |    |    |   |   |   |   |
| FN1626  | 2.475                  | 8.815                |          |          | 51     |      | 54.7330    |          | AAL93741.1  LSU ribosomal protein L30P       |                         |    |    |   |   |   |   |
|         |                        |                      |          |          | 33     | 9    | 45.3757    | 9.0000   |                                              |                         |    |    |   |   |   |   |
| FN1627  | 1.420                  | 17.495               | 1.469e-2 | 1.365e-2 | 791    | 193  | 848.8978   | 264.4370 | AAL93742.1  SSU ribosomal protein S5P        |                         |    |    |   |   |   |   |
|         |                        |                      |          |          | 405    | 261  | 556.8834   | 261.0000 |                                              |                         |    |    |   |   |   |   |
| FN1628  | -0.145                 | 15.795               |          |          | 242    | 183  | 259.7134   | 250.7356 | AAL93743.1  LSU ribosomal protein L18P       |                         |    |    |   |   |   |   |
|         |                        |                      |          |          | 141    |      | 193.8779   |          |                                              |                         |    |    |   |   |   |   |
| FN1629  | -0.359                 | 16.420               | 1.793e-1 | 5.103e-1 | 217    | 369  | 232.8835   | 505.5816 | AAL93744.1  LSU ribosomal protein L6P        |                         |    |    |   |   |   |   |
|         |                        |                      |          |          | 211    | 165  | 290.1294   | 165.0000 |                                              |                         |    |    |   |   |   |   |
| FN1630  | 1.095                  | 13.592               | 4.901e-2 | 7.716e-2 | 204    | 57   | 218.9319   | 78.0980  | AAL93745.1  SSU ribosomal protein S8P        |                         |    |    |   |   |   |   |
|         |                        |                      |          |          | 77     | 74   | 105.8766   | 74.0000  |                                              |                         |    |    |   |   |   |   |
| FN1631  | 2.663                  | 7.307                |          |          | 27     |      | 28.9763    |          | AAL93746.1  SSU ribosomal protein S14P       |                         |    |    |   |   |   |   |
|         |                        |                      |          |          | 25     | 5    | 34.3755    | 5.0000   |                                              |                         |    |    |   |   |   |   |
| FN1632  | 0.770                  | 16.207               | 3.245e-4 | 4.639e-5 | 326    | 152  | 349.8618   | 208.2613 | AAL93747.1  LSU ribosomal protein L5P        |                         |    |    |   |   |   |   |
|         |                        |                      |          |          | 268    | 213  | 368.5056   | 213.0000 |                                              |                         |    |    |   |   |   |   |
| FN1634  | -0.445                 | 11.573               |          |          | 51     | 47   | 54.7330    | 64.3966  | AAL93749.1  LSU ribosomal protein L24P       |                         |    |    |   |   |   |   |
|         |                        |                      |          |          | 29     |      | 39.8756    |          |                                              |                         |    |    |   |   |   |   |
| FN1635  | 2.328                  | 10.593               | 6.093e-3 | 3.372e-3 | 68     | 11   | 72.9773    | 15.0715  | AAL93750.1  LSU ribosomal protein L14P       |                         |    |    |   |   |   |   |
|         |                        |                      |          |          | 75     | 20   | 103.1266   | 20.0000  |                                              |                         |    |    |   |   |   |   |
| FN1636  | 0.556                  | 9.799                | 1.266e-1 | 3.146e-1 | 29     | 6    | 31.1227    | 8.2208   | AAL93751.1  SSU ribosomal protein S17P       |                         |    |    |   |   |   |   |
|         |                        |                      |          |          | 30     | 41   | 41.2506    | 41.0000  |                                              |                         |    |    |   |   |   |   |
| FN1637  |                        |                      |          |          | 34     |      | 36.4887    |          | AAL93752.1  LSU ribosomal protein L29P       |                         |    |    |   |   |   |   |
|         |                        |                      |          |          | 31     |      | 42.6256    |          |                                              |                         |    |    |   |   |   |   |
| FN1638  | 2.135                  | 14.475               | 1.758e-3 | 5.738e-4 | 292    | 73   | 313.3732   | 100.0202 | AAL93753.1  LSU ribosomal protein L16P       |                         |    |    |   |   |   |   |
|         |                        |                      |          |          | 232    | 44   | 319.0048   | 44.0000  |                                              |                         |    |    |   |   |   |   |

Show detected proteins only  
 Show all proteins  
 Filter by category:  
 GO: amino acid transport

Proteins found:  
 1305

Enter (or paste) list of ORFs

Test Cutoff

| Signif      | Direction | Applies To |
|-------------|-----------|------------|
| red         | yes       | +          |
| yellow      | no        | n/a        |
| green       | yes       | -          |
| pink        | yes       | +          |
| light green | yes       | -          |



Fn Summary Table FnPg vs Fn FnSg vs Fn FnPgSg vs Fn FnPgSg vs FnPg FnSg vs FnPg FnPgSg vs FnSg Fn Coverage

| Protein | FnPgSg vs FnPg         |                      |          |          | Raw    |      |           |          | Normalized                                    |      |        |      | Description | Log <sub>2</sub> Ratios |    |    |   |   |   |   |  |
|---------|------------------------|----------------------|----------|----------|--------|------|-----------|----------|-----------------------------------------------|------|--------|------|-------------|-------------------------|----|----|---|---|---|---|--|
|         | Log <sub>2</sub> Ratio | Log <sub>2</sub> Sum | q-Value  | p-Value  | FnPgSg | FnPg | FnPgSg    | FnPg     | FnPgSg                                        | FnPg | FnPgSg | FnPg |             | -6                      | -4 | -2 | 0 | 2 | 4 | 6 |  |
| FN1639  | 0.889                  | 19.546               | 1.293e-2 | 1.113e-2 | 1241   | 619  | 1331.8359 | 848.1166 |                                               |      |        |      |             |                         |    |    |   |   |   |   |  |
|         |                        |                      |          |          | 763    | 438  | 1049.1408 | 438.0000 | AAL93754.1  SSU ribosomal protein S3P         |      |        |      |             |                         |    |    |   |   |   |   |  |
| FN1640  | 2.300                  | 15.503               | 1.902e-3 | 6.501e-4 | 380    | 98   | 407.8144  | 134.2737 |                                               |      |        |      |             |                         |    |    |   |   |   |   |  |
|         |                        |                      |          |          | 399    | 60   | 548.6333  | 60.0000  | AAL93755.1  LSU ribosomal protein L22P        |      |        |      |             |                         |    |    |   |   |   |   |  |
| FN1641  | 0.916                  | 14.954               | 4.351e-2 | 6.477e-2 | 246    | 147  | 264.0062  | 201.4106 |                                               |      |        |      |             |                         |    |    |   |   |   |   |  |
|         |                        |                      |          |          | 164    | 58   | 225.5034  | 58.0000  | AAL93756.1  SSU ribosomal protein S19P        |      |        |      |             |                         |    |    |   |   |   |   |  |
| FN1642  | 0.080                  | 15.932               | 2.689e-1 | 8.816e-1 | 233    | 285  | 250.0546  | 390.4899 |                                               |      |        |      |             |                         |    |    |   |   |   |   |  |
|         |                        |                      |          |          | 192    | 96   | 264.0040  | 96.0000  | AAL93757.1  LSU ribosomal protein L2P         |      |        |      |             |                         |    |    |   |   |   |   |  |
| FN1643  | -0.241                 | 13.367               | 2.237e-1 | 6.907e-1 | 84     | 131  | 90.1484   | 179.4883 |                                               |      |        |      |             |                         |    |    |   |   |   |   |  |
|         |                        |                      |          |          | 72     | 44   | 99.0015   | 44.0000  | AAL93758.1  LSU ribosomal protein L23P        |      |        |      |             |                         |    |    |   |   |   |   |  |
| FN1644  | 0.978                  | 19.726               | 7.507e-3 | 4.746e-3 | 1202   | 594  | 1289.9813 | 813.8631 |                                               |      |        |      |             |                         |    |    |   |   |   |   |  |
|         |                        |                      |          |          | 963    | 513  | 1324.1450 | 513.0000 | AAL93759.1  LSU ribosomal protein L1E         |      |        |      |             |                         |    |    |   |   |   |   |  |
| FN1645  | 1.949                  | 17.537               | 3.325e-3 | 1.438e-3 | 764    | 248  | 819.9216  | 339.7947 |                                               |      |        |      |             |                         |    |    |   |   |   |   |  |
|         |                        |                      |          |          | 650    | 104  | 893.7635  | 104.0000 | AAL93760.1  LSU ribosomal protein L3P         |      |        |      |             |                         |    |    |   |   |   |   |  |
| FN1646  | 0.215                  | 15.106               | 1.93e-1  | 5.663e-1 | 163    | 180  | 174.9309  | 246.6252 |                                               |      |        |      |             |                         |    |    |   |   |   |   |  |
|         |                        |                      |          |          | 167    | 102  | 229.6285  | 102.0000 | AAL93761.1  SSU ribosomal protein S10P        |      |        |      |             |                         |    |    |   |   |   |   |  |
| FN1647  | 0.589                  | 17.336               | 1.227e-1 | 3.002e-1 | 530    | 409  | 568.7937  | 560.3872 |                                               |      |        |      |             |                         |    |    |   |   |   |   |  |
|         |                        |                      |          |          | 312    | 103  | 429.0065  | 103.0000 | AAL93762.1  Hypothetical protein              |      |        |      |             |                         |    |    |   |   |   |   |  |
| FN1652  | 0.828                  | 12.259               | 2.003e-5 | 6.731e-7 | 88     | 38   | 94.4412   | 52.0653  |                                               |      |        |      |             |                         |    |    |   |   |   |   |  |
|         |                        |                      |          |          | 67     | 53   | 92.1264   | 53.0000  | AAL93767.1  Oligopeptide-binding protein oppA |      |        |      |             |                         |    |    |   |   |   |   |  |
| FN1654  | -0.612                 | 11.064               | 1.319e-1 | 3.35e-1  | 39     | 20   | 41.8546   | 27.4028  |                                               |      |        |      |             |                         |    |    |   |   |   |   |  |
|         |                        |                      |          |          | 24     | 87   | 33.0005   | 87.0000  | AAL93769.1  Hypothetical protein              |      |        |      |             |                         |    |    |   |   |   |   |  |
| FN1655  | -1.076                 | 11.732               | 4.52e-2  | 6.843e-2 | 39     | 82   | 41.8546   | 112.3515 |                                               |      |        |      |             |                         |    |    |   |   |   |   |  |
|         |                        |                      |          |          | 28     | 57   | 38.5006   | 57.0000  | AAL93770.1  Hypothetical cytosolic protein    |      |        |      |             |                         |    |    |   |   |   |   |  |
| FN1656  |                        |                      |          |          | 21     |      | 22.5371   |          |                                               |      |        |      |             |                         |    |    |   |   |   |   |  |
|         |                        |                      |          |          | 27     |      | 37.1256   |          | AAL93771.1  SSU ribosomal protein S18P        |      |        |      |             |                         |    |    |   |   |   |   |  |
| FN1657  | -0.687                 | 12.974               | 1.618e-1 | 4.438e-1 | 60     | 145  | 64.3917   | 198.6703 |                                               |      |        |      |             |                         |    |    |   |   |   |   |  |
|         |                        |                      |          |          | 56     | 29   | 77.0012   | 29.0000  | AAL93772.1  SSU ribosomal protein S6P         |      |        |      |             |                         |    |    |   |   |   |   |  |
| FN1658  | 1.436                  | 14.077               | 1.326e-3 | 3.795e-4 | 189    | 59   | 202.8340  | 80.8383  |                                               |      |        |      |             |                         |    |    |   |   |   |   |  |
|         |                        |                      |          |          | 167    | 79   | 229.6285  | 79.0000  | AAL93773.1  Prolyl-tRNA synthetase            |      |        |      |             |                         |    |    |   |   |   |   |  |
| FN1661  | 0.507                  | 10.602               | 6.373e-3 | 3.615e-3 | 44     | 22   | 47.2206   | 30.1431  |                                               |      |        |      |             |                         |    |    |   |   |   |   |  |
|         |                        |                      |          |          | 34     | 36   | 46.7507   | 36.0000  | AAL93776.1  Hypothetical cytosolic protein    |      |        |      |             |                         |    |    |   |   |   |   |  |

Show detected proteins only  
 Show all proteins  
 Filter by category:

Proteins found:  
1305

Test Cutoff

| Signif | Direction | Applies To   |
|--------|-----------|--------------|
| yes    | +         | ratios, bars |
| no     | n/a       | bars         |
| yes    | -         | ratios, bars |
| yes    | +         | p-, q-Values |
| yes    | -         | p-, q-Values |

Fn Summary Table FnPg vs Fn FnSg vs Fn FnPgSg vs Fn FnPgSg vs FnPg FnSg vs FnPg FnPgSg vs FnSg Fn Coverage

| Protein | FnPgSg vs FnPg         |                      |          |          | Raw    |      | Normalized |          | Description                                                     | Log <sub>2</sub> Ratios |    |    |   |   |   |   |
|---------|------------------------|----------------------|----------|----------|--------|------|------------|----------|-----------------------------------------------------------------|-------------------------|----|----|---|---|---|---|
|         | Log <sub>2</sub> Ratio | Log <sub>2</sub> Sum | q-Value  | p-Value  | FnPgSg | FnPg | FnPgSg     | FnPg     |                                                                 | -6                      | -4 | -2 | 0 | 2 | 4 | 6 |
| FN1662  | 0.220                  | 9.356                | 1.743e-1 | 4.909e-1 | 31     | 12   | 33.2691    | 16.4417  | AAL93777.1  Hypothetical protein                                |                         |    |    |   |   |   |   |
|         |                        |                      |          |          | 16     | 31   | 22.0003    | 31.0000  |                                                                 |                         |    |    |   |   |   |   |
| FN1663  | 1.099                  | 7.439                |          |          | 18     |      | 19.3175    |          | AAL93778.1  Hypothetical protein                                |                         |    |    |   |   |   |   |
|         |                        |                      |          |          | 14     | 9    | 19.2503    | 9.0000   |                                                                 |                         |    |    |   |   |   |   |
| FN1667  |                        |                      |          |          |        | 3    |            | 4.1104   | AAL93782.1  dTDP-glucose 4,6-dehydratase                        |                         |    |    |   |   |   |   |
|         |                        |                      |          |          |        |      |            |          |                                                                 |                         |    |    |   |   |   |   |
| FN1668  |                        |                      |          |          |        |      |            |          | AAL93783.1  Cholinephosphate cytidyltransferase                 |                         |    |    |   |   |   |   |
|         |                        |                      |          |          |        | 5    |            | 5.0000   |                                                                 |                         |    |    |   |   |   |   |
| FN1670  | -0.256                 | 9.582                | 8.4e-2   | 1.675e-1 | 28     | 23   | 30.0495    | 31.5132  | AAL93785.1  Choline kinase                                      |                         |    |    |   |   |   |   |
|         |                        |                      |          |          | 15     | 29   | 20.6253    | 29.0000  |                                                                 |                         |    |    |   |   |   |   |
| FN1679  | -0.323                 | 17.283               | 1.052e-1 | 2.385e-1 | 354    | 249  | 379.9113   | 341.1648 | AAL93794.1  LPS biosynthesis protein WbpG                       |                         |    |    |   |   |   |   |
|         |                        |                      |          |          | 243    | 552  | 334.1300   | 552.0000 |                                                                 |                         |    |    |   |   |   |   |
| FN1683  | 0.896                  | 10.706               | 4.808e-2 | 7.497e-2 | 68     | 16   | 72.9773    | 21.9222  | AAL93798.1  Acetyltransferase                                   |                         |    |    |   |   |   |   |
|         |                        |                      |          |          | 28     | 38   | 38.5006    | 38.0000  |                                                                 |                         |    |    |   |   |   |   |
| FN1684  | -0.166                 | 17.072               | 1.777e-1 | 5.042e-1 | 311    | 358  | 333.7639   | 490.5101 | AAL93799.1  N-acetylneuraminate synthase                        |                         |    |    |   |   |   |   |
|         |                        |                      |          |          | 267    | 296  | 367.1305   | 296.0000 |                                                                 |                         |    |    |   |   |   |   |
| FN1685  | -0.271                 | 11.975               | 1.921e-1 | 5.627e-1 | 50     | 74   | 53.6598    | 101.3903 | AAL93800.1  dTDP-4-dehydrorhamnose reductase                    |                         |    |    |   |   |   |   |
|         |                        |                      |          |          | 45     | 38   | 61.8759    | 38.0000  |                                                                 |                         |    |    |   |   |   |   |
| FN1686  | -0.161                 | 15.922               | 2.246e-1 | 6.942e-1 | 256    | 270  | 274.7381   | 369.9378 | AAL93801.1  Spore coat polysaccharide biosynthesis protein spsF |                         |    |    |   |   |   |   |
|         |                        |                      |          |          | 143    | 157  | 196.6280   | 157.0000 |                                                                 |                         |    |    |   |   |   |   |
| FN1687  | 0.119                  | 15.373               | 1.23e-1  | 3.015e-1 | 222    | 147  | 238.2495   | 201.4106 | AAL93802.1  Gluconate 5-dehydrogenase                           |                         |    |    |   |   |   |   |
|         |                        |                      |          |          | 139    | 194  | 191.1279   | 194.0000 |                                                                 |                         |    |    |   |   |   |   |
| FN1688  | -0.486                 | 13.781               | 1.738e-1 | 4.888e-1 | 92     | 167  | 98.7340    | 228.8134 | AAL93803.1  Oxidoreductase                                      |                         |    |    |   |   |   |   |
|         |                        |                      |          |          | 74     | 52   | 101.7515   | 52.0000  |                                                                 |                         |    |    |   |   |   |   |
| FN1689  | 0.804                  | 17.324               | 1.119e-3 | 2.917e-4 | 494    | 241  | 530.1587   | 330.2037 | AAL93804.1  UDP-N-acetylglucosamine 4,6-dehydratase             |                         |    |    |   |   |   |   |
|         |                        |                      |          |          | 393    | 283  | 540.3831   | 283.0000 |                                                                 |                         |    |    |   |   |   |   |
| FN1690  | -0.975                 | 10.093               | 4.943e-2 | 7.816e-2 | 26     | 45   | 27.9031    | 61.6563  | AAL93805.1  Hypothetical protein                                |                         |    |    |   |   |   |   |
|         |                        |                      |          |          | 14     | 31   | 19.2503    | 31.0000  |                                                                 |                         |    |    |   |   |   |   |
| FN1692  | 0.499                  | 10.397               | 1.218e-1 | 2.969e-1 | 57     | 21   | 61.1722    | 28.7729  | AAL93807.1  Glycosyl transferase                                |                         |    |    |   |   |   |   |
|         |                        |                      |          |          | 19     | 33   | 26.1254    | 33.0000  |                                                                 |                         |    |    |   |   |   |   |
| FN1693  | 0.183                  | 8.180                | 1.997e-1 | 5.95e-1  | 21     | 8    | 22.5371    | 10.9611  | AAL93808.1  Hypothetical protein                                |                         |    |    |   |   |   |   |
|         |                        |                      |          |          | 10     | 21   | 13.7502    | 21.0000  |                                                                 |                         |    |    |   |   |   |   |

Show detected proteins only  
 Show all proteins  
 Filter by category:

Proteins found: 1305

Enter (or paste) list of ORFs

Find ORFs

Test Cutoff

q-Value

p-Value

.005

| Signif | Direction | Applies To   |
|--------|-----------|--------------|
| yes    | +         | ratios, bars |
| no     | n/a       | bars         |
| yes    | -         | ratios, bars |
| yes    | +         | p-, q-Values |
| yes    | -         | p-, q-Values |

Dot Plots Dot Plots

Fn Summary Table FnPg vs Fn FnSg vs Fn FnPgSg vs Fn FnPgSg vs FnPg FnSg vs FnPg FnPgSg vs FnSg Fn Coverage

| Protein | FnPgSg vs FnPg         |                      |          |          | Raw    |      | Normalized |          | Description                                           | Log <sub>2</sub> Ratios |    |    |   |   |   |   |
|---------|------------------------|----------------------|----------|----------|--------|------|------------|----------|-------------------------------------------------------|-------------------------|----|----|---|---|---|---|
|         | Log <sub>2</sub> Ratio | Log <sub>2</sub> Sum | q-Value  | p-Value  | FnPgSg | FnPg | FnPgSg     | FnPg     |                                                       | -6                      | -4 | -2 | 0 | 2 | 4 | 6 |
| FN1694  | 0.870                  | 12.342               | 2.391e-2 | 2.733e-2 | 88     | 53   | 94.4412    | 72.6174  | AAL93809.1  UDP-N-acetyl-D-quinovosamine 4-epimerase  |                         |    |    |   |   |   |   |
|         |                        |                      |          |          | 73     | 34   | 100.3765   | 34.0000  |                                                       |                         |    |    |   |   |   |   |
| FN1695  | 1.619                  | 9.044                | 2.539e-3 | 9.623e-4 | 43     | 6    | 46.1474    | 8.2208   | AAL93810.1  Probable quinovosaminephosphotransferase  |                         |    |    |   |   |   |   |
|         |                        |                      |          |          | 25     | 18   | 34.3755    | 18.0000  |                                                       |                         |    |    |   |   |   |   |
| FN1696  | 0.020                  | 14.703               | 2.774e-1 | 9.202e-1 | 163    | 93   | 174.9309   | 127.4230 | AAL93811.1  UDP-N-acetylglucosamine 4,6-dehydratase   |                         |    |    |   |   |   |   |
|         |                        |                      |          |          | 112    | 197  | 154.0023   | 197.0000 |                                                       |                         |    |    |   |   |   |   |
| FN1697  | -0.155                 | 12.913               | 2.349e-1 | 7.36e-1  | 68     | 36   | 72.9773    | 49.3250  | AAL93812.1  Hypothetical protein                      |                         |    |    |   |   |   |   |
|         |                        |                      |          |          | 68     | 136  | 93.5014    | 136.0000 |                                                       |                         |    |    |   |   |   |   |
| FN1698  | -0.733                 | 13.739               | 5.955e-2 | 1.036e-1 | 78     | 77   | 83.7093    | 105.5008 | AAL93813.1  dTDP-4-dehydrorhamnose reductase          |                         |    |    |   |   |   |   |
|         |                        |                      |          |          | 71     | 196  | 97.6265    | 196.0000 |                                                       |                         |    |    |   |   |   |   |
| FN1701  | -0.358                 | 10.081               | 5.329e-2 | 8.782e-2 | 26     | 23   | 27.9031    | 31.5132  | AAL93816.1  ABC transporter ATP-binding protein       |                         |    |    |   |   |   |   |
|         |                        |                      |          |          | 22     | 43   | 30.2505    | 43.0000  |                                                       |                         |    |    |   |   |   |   |
| FN1703  | -0.779                 | 13.578               | 1.007e-1 | 2.219e-1 | 74     | 56   | 79.4165    | 76.7278  | AAL93818.1  ADP-L-glycero-D-manno-heptose-6-epimerase |                         |    |    |   |   |   |   |
|         |                        |                      |          |          | 65     | 213  | 89.3763    | 213.0000 |                                                       |                         |    |    |   |   |   |   |
| FN1704  | -0.299                 | 6.117                |          |          | 7      | 4    | 7.5124     | 5.4806   | AAL93819.1  Serine protease                           |                         |    |    |   |   |   |   |
|         |                        |                      |          |          |        | 13   |            | 13.0000  |                                                       |                         |    |    |   |   |   |   |
| FN1708  | 0.356                  | 17.781               | 5.334e-4 | 9.817e-5 | 488    | 294  | 523.7195   | 402.8211 | AAL93823.1  Polyribonucleotide nucleotidyltransferase |                         |    |    |   |   |   |   |
|         |                        |                      |          |          | 400    | 436  | 550.0083   | 436.0000 |                                                       |                         |    |    |   |   |   |   |
| FN1711  |                        |                      |          |          | 3      |      | 3.2196     |          | AAL93826.1  Methyltransferase                         |                         |    |    |   |   |   |   |
|         |                        |                      |          |          | 3      |      | 4.1251     |          |                                                       |                         |    |    |   |   |   |   |
| FN1713  |                        |                      |          |          |        |      |            |          | AAL93828.1  tRNA (Uracil-5-) - methyltransferase      |                         |    |    |   |   |   |   |
|         |                        |                      |          |          |        | 11   |            | 11.0000  |                                                       |                         |    |    |   |   |   |   |
| FN1715  |                        |                      |          |          |        |      |            |          | AAL93830.1  ATPase                                    |                         |    |    |   |   |   |   |
|         |                        |                      |          |          |        | 3    |            | 3.0000   |                                                       |                         |    |    |   |   |   |   |
| FN1717  | -0.404                 | 7.988                | 1.247e-1 | 3.078e-1 | 13     | 18   | 13.9515    | 24.6625  | AAL93832.1  NAD-dependent DNA ligase                  |                         |    |    |   |   |   |   |
|         |                        |                      |          |          | 10     | 12   | 13.7502    | 12.0000  |                                                       |                         |    |    |   |   |   |   |
| FN1718  | 0.130                  | 17.029               | 1.095e-1 | 2.543e-1 | 372    | 284  | 399.2288   | 389.1197 | AAL93833.1  Protein translocase subunit secA          |                         |    |    |   |   |   |   |
|         |                        |                      |          |          | 266    | 310  | 365.7555   | 310.0000 |                                                       |                         |    |    |   |   |   |   |
| FN1719  | -0.176                 | 16.248               | 7.711e-2 | 1.479e-1 | 261    | 238  | 280.1041   | 326.0933 | AAL93834.1  Hypothetical protein                      |                         |    |    |   |   |   |   |
|         |                        |                      |          |          | 178    | 267  | 244.7537   | 267.0000 |                                                       |                         |    |    |   |   |   |   |
| FN1723  | 0.619                  | 12.380               | 8.064e-3 | 5.4e-3   | 93     | 40   | 99.8072    | 54.8056  | AAL93838.1  Glucose inhibited division protein A      |                         |    |    |   |   |   |   |
|         |                        |                      |          |          | 59     | 63   | 81.1262    | 63.0000  |                                                       |                         |    |    |   |   |   |   |

Show detected proteins only  
 Show all proteins  
 Filter by category:

Proteins found:  
1305

Enter (or paste) list of ORFs

Find ORFs

Test Cutoff

q-Value

p-Value

.005

| Signif | Direction | Applies To   |
|--------|-----------|--------------|
| yes    | +         | ratios, bars |
| no     | n/a       | bars         |
| yes    | -         | ratios, bars |
| yes    | +         | p-, q-Values |
| yes    | -         | p-, q-Values |

Dot Plots

Fn Summary Table FnPg vs Fn FnSg vs Fn FnPgSg vs Fn FnPgSg vs FnPg FnSg vs FnPg FnPgSg vs FnSg Fn Coverage

| Protein | FnPgSg vs FnPg         |                      |          |          | Raw    |      | Normalized |          | Description                                         | Log <sub>2</sub> Ratios |    |    |   |   |   |   |
|---------|------------------------|----------------------|----------|----------|--------|------|------------|----------|-----------------------------------------------------|-------------------------|----|----|---|---|---|---|
|         | Log <sub>2</sub> Ratio | Log <sub>2</sub> Sum | q-Value  | p-Value  | FnPgSg | FnPg | FnPgSg     | FnPg     |                                                     | -6                      | -4 | -2 | 0 | 2 | 4 | 6 |
| FN1724  | -1.154                 | 7.479                | 1.061e-1 | 2.421e-1 | 9      | 5    | 9.6588     | 6.8507   | AAL93839.1  Potassium uptake protein KtrA           |                         |    |    |   |   |   |   |
|         |                        |                      |          |          | 6      | 33   | 8.2501     | 33.0000  |                                                     |                         |    |    |   |   |   |   |
| FN1727  |                        |                      |          |          | 4      |      | 4.2928     |          | AAL93842.1  Chloride channel protein                |                         |    |    |   |   |   |   |
|         |                        |                      |          |          | 4      |      | 5.5001     |          |                                                     |                         |    |    |   |   |   |   |
| FN1728  | -1.508                 | 6.735                | 8.793e-5 | 6.524e-6 | 5      | 13   | 5.3660     | 17.8118  | AAL93843.1  Pyrrolidone-carboxylate peptidase       |                         |    |    |   |   |   |   |
|         |                        |                      |          |          | 5      | 17   | 6.8751     | 17.0000  |                                                     |                         |    |    |   |   |   |   |
| FN1730  | -0.688                 | 6.777                |          |          |        | 7    |            | 9.5910   | AAL93845.1  Para-aminobenzoate synthase component I |                         |    |    |   |   |   |   |
|         |                        |                      |          |          | 6      | 17   | 8.2501     | 17.0000  |                                                     |                         |    |    |   |   |   |   |
| FN1731  | 0.965                  | 7.239                |          |          | 16     | 7    | 17.1711    | 9.5910   | AAL93846.1  Anthranilate synthase component II      |                         |    |    |   |   |   |   |
|         |                        |                      |          |          |        | 8    |            | 8.0000   |                                                     |                         |    |    |   |   |   |   |
| FN1732  | -1.246                 | 10.006               | 5.457e-2 | 9.121e-2 | 26     | 21   | 27.9031    | 28.7729  | AAL93847.1  Hypothetical protein                    |                         |    |    |   |   |   |   |
|         |                        |                      |          |          | 10     | 70   | 13.7502    | 70.0000  |                                                     |                         |    |    |   |   |   |   |
| FN1733  |                        |                      |          |          |        |      |            |          | AAL93848.1  V-type sodium ATP synthase subunit D    |                         |    |    |   |   |   |   |
|         |                        |                      |          |          |        | 8    |            | 8.0000   |                                                     |                         |    |    |   |   |   |   |
| FN1734  | -0.129                 | 14.167               | 1.446e-1 | 3.821e-1 | 102    | 99   | 109.4660   | 135.6438 | AAL93849.1  V-type sodium ATP synthase subunit B    |                         |    |    |   |   |   |   |
|         |                        |                      |          |          | 109    | 148  | 149.8773   | 148.0000 |                                                     |                         |    |    |   |   |   |   |
| FN1735  | -1.290                 | 12.238               | 5.271e-2 | 8.632e-2 | 38     | 47   | 40.7814    | 64.3966  | AAL93850.1  V-type sodium ATP synthase subunit A    |                         |    |    |   |   |   |   |
|         |                        |                      |          |          | 35     | 153  | 48.1257    | 153.0000 |                                                     |                         |    |    |   |   |   |   |
| FN1736  | -1.821                 | 8.019                | 2.54e-2  | 2.981e-2 | 7      | 15   | 7.5124     | 20.5521  | AAL93851.1  V-type sodium ATP synthase subunit A    |                         |    |    |   |   |   |   |
|         |                        |                      |          |          | 7      | 40   | 9.6251     | 40.0000  |                                                     |                         |    |    |   |   |   |   |
| FN1737  |                        |                      |          |          |        | 3    |            | 4.1104   | AAL93852.1  V-type sodium ATP synthase subunit G    |                         |    |    |   |   |   |   |
|         |                        |                      |          |          |        | 6    |            | 6.0000   |                                                     |                         |    |    |   |   |   |   |
| FN1738  | -2.659                 | 10.305               | 3.368e-2 | 4.519e-2 | 11     | 94   | 11.8052    | 128.7931 | AAL93853.1  V-type sodium ATP synthase subunit C    |                         |    |    |   |   |   |   |
|         |                        |                      |          |          | 12     | 50   | 16.5002    | 50.0000  |                                                     |                         |    |    |   |   |   |   |
| FN1739  | 1.155                  | 7.194                | 8.725e-7 | 7.771e-9 | 17     | 6    | 18.2443    | 8.2208   | AAL93854.1  V-type sodium ATP synthase subunit E    |                         |    |    |   |   |   |   |
|         |                        |                      |          |          | 13     | 8    | 17.8753    | 8.0000   |                                                     |                         |    |    |   |   |   |   |
| FN1740  |                        |                      |          |          |        |      |            |          | AAL93855.1  V-type sodium ATP synthase subunit K    |                         |    |    |   |   |   |   |
|         |                        |                      |          |          |        | 185  |            | 185.0000 |                                                     |                         |    |    |   |   |   |   |
| FN1741  | -2.087                 | 7.840                | 2.797e-3 | 1.105e-3 | 6      | 20   | 6.4392     | 27.4028  | AAL93856.1  V-type sodium ATP synthase subunit I    |                         |    |    |   |   |   |   |
|         |                        |                      |          |          | 6      | 35   | 8.2501     | 35.0000  |                                                     |                         |    |    |   |   |   |   |
| FN1742  |                        |                      |          |          |        | 9    |            | 12.3313  | AAL93857.1  V-type sodium ATP synthase subunit G    |                         |    |    |   |   |   |   |
|         |                        |                      |          |          |        | 8    |            | 8.0000   |                                                     |                         |    |    |   |   |   |   |

Show detected proteins only  
 Show all proteins  
 Filter by category:

Proteins found: 1305

Test Cutoff

| Signif | Direction | Applies To   |
|--------|-----------|--------------|
| yes    | +         | ratios, bars |
| no     | n/a       | bars         |
| yes    | -         | ratios, bars |
| yes    | +         | p-, q-Values |
| yes    | -         | p-, q-Values |

Fn Summary Table FnPg vs Fn FnSg vs Fn FnPgSg vs Fn FnPgSg vs FnPg FnSg vs FnPg FnPgSg vs FnSg Fn Coverage

| Protein | FnPgSg vs FnPg         |                      |          |          | Raw    |      |           |           | Normalized |      |        |      | Description | Log <sub>2</sub> Ratios |    |    |   |   |   |   |
|---------|------------------------|----------------------|----------|----------|--------|------|-----------|-----------|------------|------|--------|------|-------------|-------------------------|----|----|---|---|---|---|
|         | Log <sub>2</sub> Ratio | Log <sub>2</sub> Sum | q-Value  | p-Value  | FnPgSg | FnPg | FnPgSg    | FnPg      | FnPgSg     | FnPg | FnPgSg | FnPg |             | -6                      | -4 | -2 | 0 | 2 | 4 | 6 |
| FN1743  |                        |                      |          |          |        |      |           | 8         |            |      | 8.0000 |      |             |                         |    |    |   |   |   |   |
| FN1745  | -1.461                 | 7.709                |          |          | 6      |      | 6.4392    |           |            |      |        |      |             |                         |    |    |   |   |   |   |
| FN1746  |                        |                      |          |          |        |      |           |           |            |      |        |      |             |                         |    |    |   |   |   |   |
| FN1752  |                        |                      |          |          |        |      |           |           |            |      |        |      |             |                         |    |    |   |   |   |   |
| FN1754  |                        |                      |          |          |        |      |           |           |            |      |        |      |             |                         |    |    |   |   |   |   |
| FN1763  | -2.203                 | 9.765                |          |          |        |      |           |           |            |      |        |      |             |                         |    |    |   |   |   |   |
| FN1764  | -0.410                 | 23.624               | 1.963e-1 | 5.803e-1 | 2954   | 926  | 3170.2203 | 1268.7495 |            |      |        |      |             |                         |    |    |   |   |   |   |
| FN1765  | 0.411                  | 18.283               | 1.14e-1  | 2.698e-1 | 563    | 207  | 604.2092  | 283.6189  |            |      |        |      |             |                         |    |    |   |   |   |   |
| FN1780  | 1.215                  | 8.485                | 1.004e-2 | 7.598e-3 | 23     | 5    | 24.6835   | 6.8507    |            |      |        |      |             |                         |    |    |   |   |   |   |
| FN1781  | 0.121                  | 17.972               | 1.867e-1 | 5.402e-1 | 496    | 433  | 532.3051  | 593.2706  |            |      |        |      |             |                         |    |    |   |   |   |   |
| FN1783  |                        |                      |          |          |        |      |           |           |            |      |        |      |             |                         |    |    |   |   |   |   |
| FN1784  | -0.541                 | 6.103                |          |          |        |      |           |           |            |      |        |      |             |                         |    |    |   |   |   |   |
| FN1785  | 1.793                  | 9.194                |          |          | 25     |      | 26.8299   |           |            |      |        |      |             |                         |    |    |   |   |   |   |
| FN1786  | 1.290                  | 10.539               | 1.576e-2 | 1.535e-2 | 56     | 9    | 60.0990   | 12.3313   |            |      |        |      |             |                         |    |    |   |   |   |   |
| FN1787  | 1.097                  | 9.179                | 1.653e-2 | 1.635e-2 | 40     | 16   | 42.9278   | 21.9222   |            |      |        |      |             |                         |    |    |   |   |   |   |
| FN1788  | 0.044                  | 9.299                | 2.706e-1 | 8.895e-1 | 27     | 12   | 28.9763   | 16.4417   |            |      |        |      |             |                         |    |    |   |   |   |   |

Show detected proteins only  
 Show all proteins  
 Filter by category:

Proteins found:  
1305

Enter (or paste) list of ORFs

Find ORFs

Test Cutoff

q-Value

p-Value

.005

| Signif | Direction | Applies To   |
|--------|-----------|--------------|
| yes    | +         | ratios, bars |
| no     | n/a       | bars         |
| yes    | -         | ratios, bars |
| yes    | +         | p-, q-Values |
| yes    | -         | p-, q-Values |

Dot Plots  Dot Plots

Fn Summary Table FnPg vs Fn FnSg vs Fn FnPgSg vs Fn FnPgSg vs FnPg FnSg vs FnPg FnPgSg vs FnSg Fn Coverage

| Protein | FnPgSg vs FnPg         |                      |          |          | Raw    |      |           |           | Normalized                                                               |      |        |      | Description | Log <sub>2</sub> Ratios |    |    |   |   |   |   |
|---------|------------------------|----------------------|----------|----------|--------|------|-----------|-----------|--------------------------------------------------------------------------|------|--------|------|-------------|-------------------------|----|----|---|---|---|---|
|         | Log <sub>2</sub> Ratio | Log <sub>2</sub> Sum | q-Value  | p-Value  | FnPgSg | FnPg | FnPgSg    | FnPg      | FnPgSg                                                                   | FnPg | FnPgSg | FnPg |             | -6                      | -4 | -2 | 0 | 2 | 4 | 6 |
| FN1790  | -1.822                 | 8.430                | 1.002e-1 | 2.2e-1   | 12     | 5    | 12.8783   | 6.8507    | AAL93889.1  Cob(I)alamin adenosyltransferase                             |      |        |      |             |                         |    |    |   |   |   |   |
|         |                        |                      |          |          | 5      | 63   | 6.8751    | 63.0000   |                                                                          |      |        |      |             |                         |    |    |   |   |   |   |
| FN1792  | 1.318                  | 25.036               | 7.919e-3 | 5.222e-3 | 8681   | 3669 | 9316.4123 | 5027.0431 | AAL93891.1  Hypothetical protein                                         |      |        |      |             |                         |    |    |   |   |   |   |
|         |                        |                      |          |          | 6695   | 2401 | 9205.7638 | 2401.0000 |                                                                          |      |        |      |             |                         |    |    |   |   |   |   |
| FN1793  | -0.993                 | 14.177               | 1.286e-1 | 3.223e-1 | 85     | 38   | 91.2216   | 52.0653   | AAL93892.1  Phosphoenolpyruvate-protein phosphotransferase               |      |        |      |             |                         |    |    |   |   |   |   |
|         |                        |                      |          |          | 74     | 332  | 101.7515  | 332.0000  |                                                                          |      |        |      |             |                         |    |    |   |   |   |   |
| FN1794  | 1.911                  | 12.582               | 1.253e-2 | 1.062e-2 | 110    | 29   | 118.0515  | 39.7341   | AAL93893.1  Phosphocarrier protein HPr                                   |      |        |      |             |                         |    |    |   |   |   |   |
|         |                        |                      |          |          | 135    | 41   | 185.6278  | 41.0000   |                                                                          |      |        |      |             |                         |    |    |   |   |   |   |
| FN1797  | -0.700                 | 10.522               | 9.57e-2  | 2.044e-1 | 33     | 21   | 35.4155   | 28.7729   | AAL93896.1  Spermidine/putrescine transport ATP-binding protein potA     |      |        |      |             |                         |    |    |   |   |   |   |
|         |                        |                      |          |          | 18     | 69   | 24.7504   | 69.0000   |                                                                          |      |        |      |             |                         |    |    |   |   |   |   |
| FN1798  | -0.744                 | 5.900                |          |          | 6      |      | 6.4392    |           | AAL93897.1  Spermidine/putrescine transport system permease protein potB |      |        |      |             |                         |    |    |   |   |   |   |
|         |                        |                      |          |          | 4      | 10   | 5.5001    | 10.0000   |                                                                          |      |        |      |             |                         |    |    |   |   |   |   |
| FN1800  | 0.853                  | 13.964               | 4.957e-3 | 2.494e-3 | 177    | 57   | 189.9556  | 78.0980   | AAL93899.1  Peptidyl-prolyl cis-trans isomerase                          |      |        |      |             |                         |    |    |   |   |   |   |
|         |                        |                      |          |          | 109    | 110  | 149.8773  | 110.0000  |                                                                          |      |        |      |             |                         |    |    |   |   |   |   |
| FN1801  | -1.949                 | 7.767                |          |          | 7      |      | 7.5124    |           | AAL93900.1  Sodium/glutamate symport carrier protein                     |      |        |      |             |                         |    |    |   |   |   |   |
|         |                        |                      |          |          |        | 29   |           | 29.0000   |                                                                          |      |        |      |             |                         |    |    |   |   |   |   |
| FN1803  |                        |                      |          |          | 22     |      | 23.6103   |           | AAL93902.1  Transcriptional regulator, TetR family                       |      |        |      |             |                         |    |    |   |   |   |   |
|         |                        |                      |          |          |        |      |           |           |                                                                          |      |        |      |             |                         |    |    |   |   |   |   |
| FN1804  |                        |                      |          |          |        |      |           |           | AAL93903.1  Aminoacyl-histidine dipeptidase                              |      |        |      |             |                         |    |    |   |   |   |   |
|         |                        |                      |          |          |        | 22   |           | 22.0000   |                                                                          |      |        |      |             |                         |    |    |   |   |   |   |
| FN1807  | 0.435                  | 17.149               | 1.233e-3 | 3.388e-4 | 407    | 251  | 436.7907  | 343.9051  | AAL93906.1  Hypothetical protein                                         |      |        |      |             |                         |    |    |   |   |   |   |
|         |                        |                      |          |          | 327    | 312  | 449.6318  | 312.0000  |                                                                          |      |        |      |             |                         |    |    |   |   |   |   |
| FN1808  | 1.442                  | 8.612                |          |          | 30     |      | 32.1959   |           | AAL93907.1  Hypothetical protein                                         |      |        |      |             |                         |    |    |   |   |   |   |
|         |                        |                      |          |          | 24     | 12   | 33.0005   | 12.0000   |                                                                          |      |        |      |             |                         |    |    |   |   |   |   |
| FN1809  | 0.210                  | 9.201                | 2.412e-1 | 7.621e-1 | 23     | 3    | 24.6835   | 4.1104    | AAL93908.1  Iron/zinc/copper-binding protein                             |      |        |      |             |                         |    |    |   |   |   |   |
|         |                        |                      |          |          | 20     | 41   | 27.5004   | 41.0000   |                                                                          |      |        |      |             |                         |    |    |   |   |   |   |
| FN1811  | 0.301                  | 9.176                | 1.695e-1 | 4.725e-1 | 19     | 9    | 20.3907   | 12.3313   | AAL93910.1  Manganese transport system ATP-binding protein mntA          |      |        |      |             |                         |    |    |   |   |   |   |
|         |                        |                      |          |          | 24     | 31   | 33.0005   | 31.0000   |                                                                          |      |        |      |             |                         |    |    |   |   |   |   |
| FN1812  | -0.120                 | 13.739               | 2.616e-1 | 8.492e-1 | 95     | 148  | 101.9536  | 202.7807  | AAL93911.1  Manganese-binding protein                                    |      |        |      |             |                         |    |    |   |   |   |   |
|         |                        |                      |          |          | 89     | 41   | 122.3768  | 41.0000   |                                                                          |      |        |      |             |                         |    |    |   |   |   |   |
| FN1813  | 0.809                  | 7.453                |          |          | 16     |      | 17.1711   |           | AAL93912.1  Manganese-binding protein                                    |      |        |      |             |                         |    |    |   |   |   |   |
|         |                        |                      |          |          | 13     | 10   | 17.8753   | 10.0000   |                                                                          |      |        |      |             |                         |    |    |   |   |   |   |

Show detected proteins only  
 Show all proteins  
 Filter by category:

Proteins found: 1305

Test Cutoff

| Signif | Direction | Applies To   |
|--------|-----------|--------------|
| yes    | +         | ratios, bars |
| no     | n/a       | bars         |
| yes    | -         | ratios, bars |
| yes    | +         | p-, q-Values |
| yes    | -         | p-, q-Values |

Fn Summary Table FnPg vs Fn FnSg vs Fn FnPgSg vs Fn FnPgSg vs FnPg FnSg vs FnPg FnPgSg vs FnSg Fn Coverage

| Protein | FnPgSg vs FnPg         |                      |          |          | Raw    |      | Normalized |          | Description                                           | Log <sub>2</sub> Ratios |    |    |   |   |   |   |
|---------|------------------------|----------------------|----------|----------|--------|------|------------|----------|-------------------------------------------------------|-------------------------|----|----|---|---|---|---|
|         | Log <sub>2</sub> Ratio | Log <sub>2</sub> Sum | q-Value  | p-Value  | FnPgSg | FnPg | FnPgSg     | FnPg     |                                                       | -6                      | -4 | -2 | 0 | 2 | 4 | 6 |
| FN1814  |                        |                      |          |          | 18     |      | 19.3175    |          | AAL93913.1  Hypothetical protein                      |                         |    |    |   |   |   |   |
|         |                        |                      |          |          | 5      |      | 6.8751     |          |                                                       |                         |    |    |   |   |   |   |
| FN1816  | -0.398                 | 6.092                | 4.697e-2 | 7.241e-2 | 7      | 8    | 7.5124     | 10.9611  | AAL93915.1  unknown                                   |                         |    |    |   |   |   |   |
|         |                        |                      |          |          | 5      | 8    | 6.8751     | 8.0000   |                                                       |                         |    |    |   |   |   |   |
| FN1817  | 0.803                  | 5.999                | 3.244e-2 | 4.268e-2 | 12     | 3    | 12.8783    | 4.1104   | AAL93916.1  Hemolysin                                 |                         |    |    |   |   |   |   |
|         |                        |                      |          |          | 6      | 8    | 8.2501     | 8.0000   |                                                       |                         |    |    |   |   |   |   |
| FN1825  |                        |                      |          |          | 10     |      | 10.7320    |          | AAL93924.1  Hypothetical protein                      |                         |    |    |   |   |   |   |
|         |                        |                      |          |          | 7      |      | 9.6251     |          |                                                       |                         |    |    |   |   |   |   |
| FN1826  | 0.832                  | 10.592               | 3.215e-3 | 1.363e-3 | 49     | 24   | 52.5866    | 32.8834  | AAL93925.1  Protease                                  |                         |    |    |   |   |   |   |
|         |                        |                      |          |          | 38     | 26   | 52.2508    | 26.0000  |                                                       |                         |    |    |   |   |   |   |
| FN1827  | -0.438                 | 10.598               | 7.193e-2 | 1.341e-1 | 31     | 26   | 33.2691    | 35.6236  | AAL93926.1  Replicative DNA helicase                  |                         |    |    |   |   |   |   |
|         |                        |                      |          |          | 25     | 56   | 34.3755    | 56.0000  |                                                       |                         |    |    |   |   |   |   |
| FN1828  | -0.942                 | 11.784               | 1.199e-1 | 2.902e-1 | 35     | 99   | 37.5619    | 135.6438 | AAL93927.1  LSU ribosomal protein L9P                 |                         |    |    |   |   |   |   |
|         |                        |                      |          |          | 35     | 29   | 48.1257    | 29.0000  |                                                       |                         |    |    |   |   |   |   |
| FN1830  | -1.284                 | 9.311                | 4.641e-2 | 7.113e-2 | 16     | 18   | 17.1711    | 24.6625  | AAL93929.1  DNA polymerase III subunits gamma and tau |                         |    |    |   |   |   |   |
|         |                        |                      |          |          | 11     | 54   | 15.1252    | 54.0000  |                                                       |                         |    |    |   |   |   |   |
| FN1831  | -1.301                 | 11.892               | 9.341e-4 | 2.159e-4 | 45     | 77   | 48.2938    | 105.5008 | AAL93930.1  Nitrogen assimilation regulatory protein  |                         |    |    |   |   |   |   |
|         |                        |                      |          |          | 22     | 88   | 30.2505    | 88.0000  |                                                       |                         |    |    |   |   |   |   |
| FN1832  |                        |                      |          |          | 4      |      | 4.2928     |          | AAL93931.1  TonB protein                              |                         |    |    |   |   |   |   |
|         |                        |                      |          |          |        |      |            |          |                                                       |                         |    |    |   |   |   |   |
| FN1833  | 0.448                  | 8.623                |          |          | 24     |      | 25.7567    |          | AAL93932.1  Biopolymer transport exbD protein         |                         |    |    |   |   |   |   |
|         |                        |                      |          |          | 15     | 17   | 20.6253    | 17.0000  |                                                       |                         |    |    |   |   |   |   |
| FN1834  | 0.395                  | 9.960                | 3.835e-2 | 5.428e-2 | 29     | 19   | 31.1227    | 26.0327  | AAL93933.1  Biopolymer transport exbB protein         |                         |    |    |   |   |   |   |
|         |                        |                      |          |          | 30     | 29   | 41.2506    | 29.0000  |                                                       |                         |    |    |   |   |   |   |
| FN1836  | 0.846                  | 11.849               | 6.353e-3 | 3.598e-3 | 80     | 26   | 85.8557    | 35.6236  | AAL93935.1  Tetratricopeptide repeat family protein   |                         |    |    |   |   |   |   |
|         |                        |                      |          |          | 56     | 55   | 77.0012    | 55.0000  |                                                       |                         |    |    |   |   |   |   |
| FN1838  | -1.439                 | 8.561                |          |          | 11     |      | 11.8052    |          | AAL93937.1  Glycerol uptake facilitator protein       |                         |    |    |   |   |   |   |
|         |                        |                      |          |          |        | 32   |            | 32.0000  |                                                       |                         |    |    |   |   |   |   |
| FN1839  | -0.907                 | 17.801               | 7.273e-2 | 1.362e-1 | 284    | 286  | 304.7876   | 391.8600 | AAL93938.1  Glycerol kinase                           |                         |    |    |   |   |   |   |
|         |                        |                      |          |          | 286    | 917  | 393.2559   | 917.0000 |                                                       |                         |    |    |   |   |   |   |
| FN1840  | 0.195                  | 13.008               | 8.779e-2 | 1.789e-1 | 90     | 53   | 96.5876    | 72.6174  | AAL93939.1  Dihydroxyacetone kinase                   |                         |    |    |   |   |   |   |
|         |                        |                      |          |          | 71     | 97   | 97.6265    | 97.0000  |                                                       |                         |    |    |   |   |   |   |

Show detected proteins only  
 Show all proteins  
 Filter by category:

Proteins found:  
1305

Enter (or paste) list of ORFs

Find ORFs

Test Cutoff

q-Value

p-Value

.005

| Signif | Direction | Applies To   |
|--------|-----------|--------------|
| yes    | +         | ratios, bars |
| no     | n/a       | bars         |
| yes    | -         | ratios, bars |
| yes    | +         | p-, q-Values |
| yes    | -         |              |

Dot Plots

Fn Summary Table FnPg vs Fn FnSg vs Fn FnPgSg vs Fn FnPgSg vs FnPg FnSg vs FnPg FnPgSg vs FnSg Fn Coverage

| Protein | FnPgSg vs FnPg         |                      |          |          | Raw    |      | Normalized |           | Description                                                        | Log <sub>2</sub> Ratios |    |    |   |   |   |   |
|---------|------------------------|----------------------|----------|----------|--------|------|------------|-----------|--------------------------------------------------------------------|-------------------------|----|----|---|---|---|---|
|         | Log <sub>2</sub> Ratio | Log <sub>2</sub> Sum | q-Value  | p-Value  | FnPgSg | FnPg | FnPgSg     | FnPg      |                                                                    | -6                      | -4 | -2 | 0 | 2 | 4 | 6 |
| FN1841  | -0.334                 | 8.117                | 1.795e-1 | 5.11e-1  | 11     | 20   | 11.8052    | 27.4028   | AAL93940.1   Dihydroxyacetone kinase                               |                         |    |    |   |   |   |   |
|         |                        |                      |          |          | 13     | 10   | 17.8753    | 10.0000   |                                                                    |                         |    |    |   |   |   |   |
| FN1842  | 1.112                  | 10.308               | 5.622e-3 | 2.987e-3 | 54     | 12   | 57.9526    | 16.4417   | AAL93941.1   Dihydroxyacetone kinase phosphotransfer protein       |                         |    |    |   |   |   |   |
|         |                        |                      |          |          | 34     | 32   | 46.7507    | 32.0000   |                                                                    |                         |    |    |   |   |   |   |
| FN1843  |                        |                      |          |          |        | 3    |            | 4.1104    | AAL93942.1   Surface antigen                                       |                         |    |    |   |   |   |   |
|         |                        |                      |          |          |        |      |            |           |                                                                    |                         |    |    |   |   |   |   |
| FN1844  |                        |                      |          |          |        |      |            | 5.0000    | AAL93943.1   Ketoacyl reductase hetN                               |                         |    |    |   |   |   |   |
|         |                        |                      |          |          |        |      | 5          |           |                                                                    |                         |    |    |   |   |   |   |
| FN1847  |                        |                      |          |          |        |      |            | 6.8507    | AAL93946.1   DTD-4-dehydrorhamnose 3,5-epimerase                   |                         |    |    |   |   |   |   |
|         |                        |                      |          |          |        |      | 24         | 24.0000   |                                                                    |                         |    |    |   |   |   |   |
| FN1848  | 0.138                  | 4.781                |          |          |        |      |            |           | AAL93947.1   Metal dependent hydrolase                             |                         |    |    |   |   |   |   |
|         |                        |                      |          |          | 4      | 5    | 5.5001     | 5.0000    |                                                                    |                         |    |    |   |   |   |   |
| FN1849  | -2.483                 | 6.687                |          |          |        |      |            | 4.2928    | AAL93948.1   Coenzyme F390 synthetase                              |                         |    |    |   |   |   |   |
|         |                        |                      |          |          |        |      | 24         | 24.0000   |                                                                    |                         |    |    |   |   |   |   |
| FN1850  |                        |                      |          |          |        |      |            |           | AAL93949.1   3-oxoacyl-[acyl-carrier-protein] synthase III         |                         |    |    |   |   |   |   |
|         |                        |                      |          |          |        |      | 48         | 48.0000   |                                                                    |                         |    |    |   |   |   |   |
| FN1851  | -1.047                 | 12.055               | 1.144e-1 | 2.709e-1 | 41     | 23   | 44.0010    | 31.5132   | AAL93950.1   Ribonuclease PH                                       |                         |    |    |   |   |   |   |
|         |                        |                      |          |          | 34     | 156  | 46.7507    | 156.0000  |                                                                    |                         |    |    |   |   |   |   |
| FN1852  | 0.471                  | 10.512               | 6.999e-2 | 1.291e-1 | 39     | 16   | 41.8546    | 21.9222   | AAL93951.1   unknown                                               |                         |    |    |   |   |   |   |
|         |                        |                      |          |          | 35     | 43   | 48.1257    | 43.0000   |                                                                    |                         |    |    |   |   |   |   |
| FN1853  | -1.649                 | 6.877                | 4.563e-2 | 6.937e-2 | 5      | 20   | 5.3660     | 27.4028   | AAL93952.1   Methylaspartate mutase                                |                         |    |    |   |   |   |   |
|         |                        |                      |          |          | 5      | 11   | 6.8751     | 11.0000   |                                                                    |                         |    |    |   |   |   |   |
| FN1854  | -0.352                 | 10.114               | 8.161e-2 | 1.605e-1 | 28     | 33   | 30.0495    | 45.2146   | AAL93953.1   Methylaspartate mutase                                |                         |    |    |   |   |   |   |
|         |                        |                      |          |          | 21     | 30   | 28.8754    | 30.0000   |                                                                    |                         |    |    |   |   |   |   |
| FN1855  |                        |                      |          |          |        |      |            | 4.0000    | AAL93954.1   Methylaspartate mutase                                |                         |    |    |   |   |   |   |
|         |                        |                      |          |          |        |      | 4          |           |                                                                    |                         |    |    |   |   |   |   |
| FN1856  | -0.081                 | 23.136               | 1.603e-1 | 4.384e-1 | 2988   | 2099 | 3206.7089  | 2875.9235 | AAL93955.1   Butyrate-acetoacetate CoA-transferase subunit B       |                         |    |    |   |   |   |   |
|         |                        |                      |          |          | 1963   | 3369 | 2699.1657  | 3369.0000 |                                                                    |                         |    |    |   |   |   |   |
| FN1857  | -0.611                 | 19.981               | 3.737e-3 | 1.711e-3 | 687    | 897  | 737.2855   | 1229.0154 | AAL93956.1   Acetoacetate: butyrate/acetate coenzyme A transferase |                         |    |    |   |   |   |   |
|         |                        |                      |          |          | 661    | 1285 | 908.8887   | 1285.0000 |                                                                    |                         |    |    |   |   |   |   |
| FN1858  | 1.480                  | 12.203               |          |          | 92     | 30   | 98.7340    | 41.1042   | AAL93957.1   Short-chain fatty acids transporter                   |                         |    |    |   |   |   |   |
|         |                        |                      |          |          | 95     |      | 130.6270   |           |                                                                    |                         |    |    |   |   |   |   |

Show detected proteins only  
 Show all proteins  
 Filter by category:

Proteins found: 1305

Test Cutoff

| Signif | Direction | Applies To   |
|--------|-----------|--------------|
| yes    | +         | ratios, bars |
| no     | n/a       | bars         |
| yes    | -         | ratios, bars |
| yes    | +         | p-, q-Values |
| yes    | -         |              |



Fn Summary Table FnPg vs Fn FnSg vs Fn FnPgSg vs Fn FnPgSg vs FnPg FnSg vs FnPg FnPgSg vs FnSg Fn Coverage

| Protein | FnPgSg vs FnPg         |                      |          |          | Raw    |      | Normalized |           | Description                                                                | Log <sub>2</sub> Ratios |    |    |   |   |   |   |
|---------|------------------------|----------------------|----------|----------|--------|------|------------|-----------|----------------------------------------------------------------------------|-------------------------|----|----|---|---|---|---|
|         | Log <sub>2</sub> Ratio | Log <sub>2</sub> Sum | q-Value  | p-Value  | FnPgSg | FnPg | FnPgSg     | FnPg      |                                                                            | -6                      | -4 | -2 | 0 | 2 | 4 | 6 |
| FN1859  | -1.872                 | 22.626               | 1.071e-1 | 2.46e-1  | 1120   | 443  | 1201.9792  | 606.9720  | AAL93958.1  Major outer membrane protein                                   |                         |    |    |   |   |   |   |
|         |                        |                      |          |          | 1060   | 9128 | 1457.5220  | 9128.0000 |                                                                            |                         |    |    |   |   |   |   |
| FN1860  | -0.814                 | 11.403               |          |          | 27     |      | 28.9763    |           | AAL93959.1  NA+/H+ antiporter NHAC                                         |                         |    |    |   |   |   |   |
|         |                        |                      |          |          | 36     | 69   | 49.5007    | 69.0000   |                                                                            |                         |    |    |   |   |   |   |
| FN1862  | 0.128                  | 15.880               | 2.215e-1 | 6.821e-1 | 249    | 232  | 267.2257   | 317.8724  | AAL93961.1  L-beta-lysine 5,6-aminomutase beta subunit                     |                         |    |    |   |   |   |   |
|         |                        |                      |          |          | 179    | 152  | 246.1287   | 152.0000  |                                                                            |                         |    |    |   |   |   |   |
| FN1863  | -0.463                 | 18.754               | 1.856e-1 | 5.357e-1 | 483    | 957  | 518.3535   | 1311.2238 | AAL93962.1  L-beta-lysine 5,6-aminomutase alpha subunit                    |                         |    |    |   |   |   |   |
|         |                        |                      |          |          | 447    | 250  | 614.6343   | 250.0000  |                                                                            |                         |    |    |   |   |   |   |
| FN1864  | 0.671                  | 8.212                | 1.062e-1 | 2.425e-1 | 20     | 17   | 21.4639    | 23.2924   | AAL93963.1  DNA mismatch repair protein mutS                               |                         |    |    |   |   |   |   |
|         |                        |                      |          |          | 16     | 4    | 22.0003    | 4.0000    |                                                                            |                         |    |    |   |   |   |   |
| FN1865  |                        |                      |          |          | 3      |      | 3.2196     |           | AAL93964.1  Hypothetical protein                                           |                         |    |    |   |   |   |   |
|         |                        |                      |          |          |        |      |            |           |                                                                            |                         |    |    |   |   |   |   |
| FN1866  | 0.438                  | 20.860               | 6.768e-2 | 1.233e-1 | 1420   | 1117 | 1523.9380  | 1530.4462 | AAL93965.1  Lysine 2,3-aminomutase                                         |                         |    |    |   |   |   |   |
|         |                        |                      |          |          | 1227   | 840  | 1687.1504  | 840.0000  |                                                                            |                         |    |    |   |   |   |   |
| FN1867  | 0.197                  | 20.209               | 1.97e-1  | 5.833e-1 | 1165   | 1058 | 1250.2731  | 1449.6080 | AAL93966.1  Zn-dependent alcohol dehydrogenases and related dehydrogenases |                         |    |    |   |   |   |   |
|         |                        |                      |          |          | 805    | 607  | 1106.8917  | 607.0000  |                                                                            |                         |    |    |   |   |   |   |
| FN1868  | 0.761                  | 14.237               | 1.486e-2 | 1.39e-2  | 168    | 96   | 180.2969   | 131.5334  | AAL93967.1  Hypothetical cytosolic protein                                 |                         |    |    |   |   |   |   |
|         |                        |                      |          |          | 132    | 82   | 181.5027   | 82.0000   |                                                                            |                         |    |    |   |   |   |   |
| FN1869  | 0.057                  | 14.998               | 2.608e-1 | 8.458e-1 | 167    | 172  | 179.2237   | 235.6641  | AAL93968.1  Hypothetical protein                                           |                         |    |    |   |   |   |   |
|         |                        |                      |          |          | 138    | 119  | 189.7529   | 119.0000  |                                                                            |                         |    |    |   |   |   |   |
| FN1870  |                        |                      |          |          |        |      |            |           | AAL93969.1  unknown                                                        |                         |    |    |   |   |   |   |
|         |                        |                      |          |          | 3      |      | 4.1251     |           |                                                                            |                         |    |    |   |   |   |   |
| FN1873  | 0.956                  | 11.028               | 6.534e-3 | 3.762e-3 | 52     | 26   | 55.8062    | 35.6236   | AAL93972.1  Bis(5'-nucleosyl)-tetraphosphatase                             |                         |    |    |   |   |   |   |
|         |                        |                      |          |          | 52     | 30   | 71.5011    | 30.0000   |                                                                            |                         |    |    |   |   |   |   |
| FN1874  | 0.311                  | 8.979                | 1.413e-1 | 3.702e-1 | 21     | 9    | 22.5371    | 12.3313   | AAL93973.1  Ribose 5-phosphate isomerase                                   |                         |    |    |   |   |   |   |
|         |                        |                      |          |          | 20     | 28   | 27.5004    | 28.0000   |                                                                            |                         |    |    |   |   |   |   |
| FN1875  | -0.098                 | 14.092               | 1.804e-1 | 5.147e-1 | 133    | 112  | 142.7350   | 153.4557  | AAL93974.1  Peptidyl-prolyl cis-trans isomerase                            |                         |    |    |   |   |   |   |
|         |                        |                      |          |          | 82     | 120  | 112.7517   | 120.0000  |                                                                            |                         |    |    |   |   |   |   |
| FN1877  | 0.324                  | 5.494                |          |          | 7      |      | 7.5124     |           | AAL93976.1  Guanine-hypoxanthine permease                                  |                         |    |    |   |   |   |   |
|         |                        |                      |          |          |        | 6    |            | 6.0000    |                                                                            |                         |    |    |   |   |   |   |
| FN1878  |                        |                      |          |          | 5      |      | 5.3660     |           | AAL93977.1  unknown                                                        |                         |    |    |   |   |   |   |
|         |                        |                      |          |          |        |      |            |           |                                                                            |                         |    |    |   |   |   |   |

Show detected proteins only  
 Show all proteins  
 Filter by category:

Proteins found: 1305

Test Cutoff

| Signif | Direction | Applies To   |
|--------|-----------|--------------|
| yes    | +         | ratios, bars |
| no     | n/a       | bars         |
| yes    | -         | ratios, bars |
| yes    | +         | p-, q-Values |
| yes    | -         |              |

Fn Summary Table FnPg vs Fn FnSg vs Fn FnPgSg vs Fn FnPgSg vs FnPg FnSg vs FnPg FnPgSg vs FnSg Fn Coverage

| Protein | FnPgSg vs FnPg         |                      |          |          | Raw    |      |          |          | Normalized |      |                                                                             |    | Log <sub>2</sub> Ratios |    |   |   |   |   |  |
|---------|------------------------|----------------------|----------|----------|--------|------|----------|----------|------------|------|-----------------------------------------------------------------------------|----|-------------------------|----|---|---|---|---|--|
|         | Log <sub>2</sub> Ratio | Log <sub>2</sub> Sum | q-Value  | p-Value  | FnPgSg | FnPg | FnPgSg   | FnPg     | FnPgSg     | FnPg | Description                                                                 | -6 | -4                      | -2 | 0 | 2 | 4 | 6 |  |
| FN1879  |                        |                      |          |          | 25     |      | 26.8299  |          |            |      | AAL93978.1  SSU ribosomal protein S20P                                      |    |                         |    |   |   |   |   |  |
|         |                        |                      |          |          | 23     |      | 31.6255  |          |            |      |                                                                             |    |                         |    |   |   |   |   |  |
| FN1880  | -1.546                 | 13.050               | 1.109e-3 | 2.871e-4 | 62     | 118  | 66.5381  | 161.6765 | 62         | 118  | AAL93979.1  Oxygen-insensitive NAD(P)H nitroreductase                       |    |                         |    |   |   |   |   |  |
|         |                        |                      |          |          | 30     | 153  | 41.2506  | 153.0000 | 30         | 153  |                                                                             |    |                         |    |   |   |   |   |  |
| FN1881  | -0.635                 | 6.009                |          |          | 6      |      | 6.4392   |          | 6          |      | AAL93980.1  Esterase                                                        |    |                         |    |   |   |   |   |  |
|         |                        |                      |          |          |        | 10   |          | 10.0000  |            | 10   |                                                                             |    |                         |    |   |   |   |   |  |
| FN1884  | 1.301                  | 12.209               |          |          | 77     | 32   | 82.6361  | 43.8445  | 77         | 32   | AAL93983.1  unknown                                                         |    |                         |    |   |   |   |   |  |
|         |                        |                      |          |          | 97     |      | 133.3770 |          | 97         |      |                                                                             |    |                         |    |   |   |   |   |  |
| FN1890  | -0.572                 | 9.255                |          |          | 16     | 22   | 17.1711  | 30.1431  | 16         | 22   | AAL93989.1  Hypothetical protein                                            |    |                         |    |   |   |   |   |  |
|         |                        |                      |          |          | 17     |      | 23.3754  |          | 17         |      |                                                                             |    |                         |    |   |   |   |   |  |
| FN1891  | -0.788                 | 8.512                | 1.377e-1 | 3.577e-1 | 13     | 6    | 13.9515  | 8.2208   | 13         | 6    | AAL93990.1  Glycerophosphoryl diester phosphodiesterase                     |    |                         |    |   |   |   |   |  |
|         |                        |                      |          |          | 11     | 42   | 15.1252  | 42.0000  | 11         | 42   |                                                                             |    |                         |    |   |   |   |   |  |
| FN1893  | -0.469                 | 17.642               | 1.688e-2 | 1.682e-2 | 309    | 389  | 331.6175 | 532.9844 | 309        | 389  | AAL93991.1  Fusobacterium outer membrane protein family                     |    |                         |    |   |   |   |   |  |
|         |                        |                      |          |          | 318    | 531  | 437.2566 | 531.0000 | 318        | 531  |                                                                             |    |                         |    |   |   |   |   |  |
| FN1895  |                        |                      |          |          | 5      |      | 5.3660   |          | 5          |      | AAL93994.1  Hypothetical protein                                            |    |                         |    |   |   |   |   |  |
|         |                        |                      |          |          |        |      |          |          |            |      |                                                                             |    |                         |    |   |   |   |   |  |
| FN1898  | 0.557                  | 9.976                | 1.009e-1 | 2.226e-1 | 32     | 9    | 34.3423  | 12.3313  | 32         | 9    | AAL93997.1  Sugar transport ATP-binding protein                             |    |                         |    |   |   |   |   |  |
|         |                        |                      |          |          | 31     | 40   | 42.6256  | 40.0000  | 31         | 40   |                                                                             |    |                         |    |   |   |   |   |  |
| FN1899  | -0.695                 | 14.785               | 3.412e-2 | 4.611e-2 | 109    | 123  | 116.9783 | 168.5272 | 109        | 123  | AAL93998.1  Hypothetical lipoprotein                                        |    |                         |    |   |   |   |   |  |
|         |                        |                      |          |          | 107    | 259  | 147.1272 | 259.0000 | 107        | 259  |                                                                             |    |                         |    |   |   |   |   |  |
| FN1902  | -0.186                 | 9.886                | 1.019e-1 | 2.263e-1 | 23     | 26   | 24.6835  | 35.6236  | 23         | 26   | AAL94001.1  Deoxycytidylate deaminase                                       |    |                         |    |   |   |   |   |  |
|         |                        |                      |          |          | 24     | 30   | 33.0005  | 30.0000  | 24         | 30   |                                                                             |    |                         |    |   |   |   |   |  |
| FN1903  | 3.357                  | 10.898               | 1.618e-4 | 1.943e-5 | 126    | 17   | 135.2227 | 23.2924  | 126        | 17   | AAL94002.1  Coenzyme A disulfide reductase/ disulfide bond regulator domain |    |                         |    |   |   |   |   |  |
|         |                        |                      |          |          | 105    | 4    | 144.3772 | 4.0000   | 105        | 4    |                                                                             |    |                         |    |   |   |   |   |  |
| FN1905  |                        |                      |          |          | 3      |      | 3.2196   |          | 3          |      | AAL94004.1  outer membrane protein                                          |    |                         |    |   |   |   |   |  |
|         |                        |                      |          |          |        |      |          |          |            |      |                                                                             |    |                         |    |   |   |   |   |  |
| FN1906  | -0.593                 | 17.157               | 9.311e-2 | 1.958e-1 | 320    | 222  | 343.4226 | 304.1710 | 320        | 222  | AAL94005.1  Cytosol aminopeptidase                                          |    |                         |    |   |   |   |   |  |
|         |                        |                      |          |          | 203    | 635  | 279.1292 | 635.0000 | 203        | 635  |                                                                             |    |                         |    |   |   |   |   |  |
| FN1908  | -0.756                 | 16.023               | 1.28e-2  | 1.097e-2 | 192    | 213  | 206.0536 | 291.8398 | 192        | 213  | AAL94007.1  Glycerophosphoryl diester phosphodiesterase                     |    |                         |    |   |   |   |   |  |
|         |                        |                      |          |          | 139    | 379  | 191.1279 | 379.0000 | 139        | 379  |                                                                             |    |                         |    |   |   |   |   |  |
| FN1909  | 0.723                  | 13.471               | 8.19e-3  | 5.559e-3 | 127    | 51   | 136.2959 | 69.8771  | 127        | 51   | AAL94008.1  UDP-3-O-[3-hydroxymyristoyl] glucosamine N-acyltransferase      |    |                         |    |   |   |   |   |  |
|         |                        |                      |          |          | 100    | 96   | 137.5021 | 96.0000  | 100        | 96   |                                                                             |    |                         |    |   |   |   |   |  |

Show detected proteins only  
 Show all proteins  
 Filter by category:

Proteins found:  
1305

Test Cutoff

| Signif | Direction | Applies To   |
|--------|-----------|--------------|
| yes    | +         | ratios, bars |
| no     | n/a       | bars         |
| yes    | -         | ratios, bars |
| yes    | +         | p-, q-Values |
| yes    | -         | p-, q-Values |

Fn Summary Table FnPg vs Fn FnSg vs Fn FnPgSg vs Fn FnPgSg vs FnPg FnSg vs FnPg FnPgSg vs FnSg Fn Coverage

| Protein | FnPgSg vs FnPg         |                      |          |          | Raw    |      |           |           | Normalized |      |                                                                          |    | Log <sub>2</sub> Ratios |    |   |   |   |   |
|---------|------------------------|----------------------|----------|----------|--------|------|-----------|-----------|------------|------|--------------------------------------------------------------------------|----|-------------------------|----|---|---|---|---|
|         | Log <sub>2</sub> Ratio | Log <sub>2</sub> Sum | q-Value  | p-Value  | FnPgSg | FnPg | FnPgSg    | FnPg      | FnPgSg     | FnPg | Description                                                              | -6 | -4                      | -2 | 0 | 2 | 4 | 6 |
| FN1910  | 1.607                  | 16.441               | 1.193e-4 | 1.237e-5 | 454    | 148  | 487.2309  | 202.7807  |            |      | AAL94009.1  periplasmic protein                                          |    |                         |    |   |   |   |   |
|         |                        |                      |          |          | 403    | 139  | 554.1334  | 139.0000  |            |      |                                                                          |    |                         |    |   |   |   |   |
| FN1911  | -0.434                 | 21.749               | 3.584e-2 | 4.941e-2 | 1561   | 1822 | 1675.2586 | 2496.3948 |            |      | AAL94010.1  Outer membrane protein                                       |    |                         |    |   |   |   |   |
|         |                        |                      |          |          | 1131   | 1869 | 1555.1484 | 1869.0000 |            |      |                                                                          |    |                         |    |   |   |   |   |
| FN1912  | -0.955                 | 5.874                |          |          |        | 9    |           | 12.3313   |            |      | AAL94011.1  Hypothetical protein                                         |    |                         |    |   |   |   |   |
|         |                        |                      |          |          | 4      | 9    | 5.5001    | 9.0000    |            |      |                                                                          |    |                         |    |   |   |   |   |
| FN1913  | -0.294                 | 11.654               | 1.722e-1 | 4.826e-1 | 43     | 64   | 46.1474   | 87.6890   |            |      | AAL94012.1  hydrolase (HD superfamily)                                   |    |                         |    |   |   |   |   |
|         |                        |                      |          |          | 41     | 38   | 56.3758   | 38.0000   |            |      |                                                                          |    |                         |    |   |   |   |   |
| FN1914  | -1.278                 | 13.356               | 1.248e-1 | 3.081e-1 | 70     | 213  | 75.1237   | 291.8398  |            |      | AAL94013.1  Anti-sigma F factor antagonist                               |    |                         |    |   |   |   |   |
|         |                        |                      |          |          | 41     | 27   | 56.3758   | 27.0000   |            |      |                                                                          |    |                         |    |   |   |   |   |
| FN1917  |                        |                      |          |          |        |      |           |           |            |      | AAL94016.1  tRNA delta(2)-isopentenylpyrophosphate transferase           |    |                         |    |   |   |   |   |
|         |                        |                      |          |          |        | 6    |           | 6.0000    |            |      |                                                                          |    |                         |    |   |   |   |   |
| FN1918  | 0.846                  | 11.987               | 3.456e-2 | 4.702e-2 | 90     | 19   | 96.5876   | 26.0327   |            |      | AAL94017.1  SPO0B-associated GTP-binding protein                         |    |                         |    |   |   |   |   |
|         |                        |                      |          |          | 54     | 69   | 74.2511   | 69.0000   |            |      |                                                                          |    |                         |    |   |   |   |   |
| FN1919  | 0.091                  | 5.897                | 2.678e-1 | 8.767e-1 | 11     | 8    | 11.8052   | 10.9611   |            |      | AAL94018.1  Methyltransferase                                            |    |                         |    |   |   |   |   |
|         |                        |                      |          |          | 3      | 4    | 4.1251    | 4.0000    |            |      |                                                                          |    |                         |    |   |   |   |   |
| FN1920  |                        |                      |          |          |        | 7    |           | 9.5910    |            |      | AAL94019.1  tRNA (5-methylaminomethyl-2-thiouridylate)-methyltransferase |    |                         |    |   |   |   |   |
|         |                        |                      |          |          |        |      |           |           |            |      |                                                                          |    |                         |    |   |   |   |   |
| FN1922  | -0.975                 | 7.064                |          |          |        | 12   |           | 16.4417   |            |      | AAL94021.1  Hypothetical protein                                         |    |                         |    |   |   |   |   |
|         |                        |                      |          |          | 6      | 16   | 8.2501    | 16.0000   |            |      |                                                                          |    |                         |    |   |   |   |   |
| FN1925  |                        |                      |          |          |        |      |           |           |            |      | AAL94024.1  Arsenical pump membrane protein                              |    |                         |    |   |   |   |   |
|         |                        |                      |          |          |        | 6    |           | 6.0000    |            |      |                                                                          |    |                         |    |   |   |   |   |
| FN1926  | -0.291                 | 12.422               | 1.894e-1 | 5.513e-1 | 71     | 32   | 76.1969   | 43.8445   |            |      | AAL94025.1  Nitrogen regulatory IIA protein                              |    |                         |    |   |   |   |   |
|         |                        |                      |          |          | 42     | 120  | 57.7509   | 120.0000  |            |      |                                                                          |    |                         |    |   |   |   |   |
| FN1927  | -1.243                 | 13.796               | 5.654e-2 | 9.618e-2 | 74     | 78   | 79.4165   | 106.8709  |            |      | AAL94026.1  DEGV protein                                                 |    |                         |    |   |   |   |   |
|         |                        |                      |          |          | 55     | 260  | 75.6261   | 260.0000  |            |      |                                                                          |    |                         |    |   |   |   |   |
| FN1928  | -0.908                 | 8.707                |          |          | 15     |      | 16.0979   |           |            |      | AAL94027.1  Transcriptional regulator, MerR family                       |    |                         |    |   |   |   |   |
|         |                        |                      |          |          | 10     | 28   | 13.7502   | 28.0000   |            |      |                                                                          |    |                         |    |   |   |   |   |
| FN1929  | -0.666                 | 10.168               | 1.428e-1 | 3.756e-1 | 22     | 12   | 23.6103   | 16.4417   |            |      | AAL94028.1  Competence-damage protein cinA                               |    |                         |    |   |   |   |   |
|         |                        |                      |          |          | 22     | 69   | 30.2505   | 69.0000   |            |      |                                                                          |    |                         |    |   |   |   |   |
| FN1931  |                        |                      |          |          |        |      |           |           |            |      | AAL94030.1  Protease                                                     |    |                         |    |   |   |   |   |
|         |                        |                      |          |          |        | 7    |           | 7.0000    |            |      |                                                                          |    |                         |    |   |   |   |   |

Show detected proteins only  
 Show all proteins  
 Filter by category:

Proteins found: 1305

Test Cutoff

| Signif | Direction | Applies To   |
|--------|-----------|--------------|
| yes    | +         | ratios, bars |
| no     | n/a       | bars         |
| yes    | -         | ratios, bars |
| yes    | +         | p-, q-Values |
| yes    | -         |              |

Fn Summary Table FnPg vs Fn FnSg vs Fn FnPgSg vs Fn FnPgSg vs FnPg FnSg vs FnPg FnPgSg vs FnSg Fn Coverage

| Protein | FnPgSg vs FnPg         |                      |          |          | Raw    |      | Normalized |           | Description                                                   | Log <sub>2</sub> Ratios |    |    |   |   |   |   |
|---------|------------------------|----------------------|----------|----------|--------|------|------------|-----------|---------------------------------------------------------------|-------------------------|----|----|---|---|---|---|
|         | Log <sub>2</sub> Ratio | Log <sub>2</sub> Sum | q-Value  | p-Value  | FnPgSg | FnPg | FnPgSg     | FnPg      |                                                               | -6                      | -4 | -2 | 0 | 2 | 4 | 6 |
| FN1933  | 1.040                  | 6.623                | 9.028e-3 | 6.443e-3 | 15     | 5    | 16.0979    | 6.8507    | AAL94032.1   Hypothetical protein                             |                         |    |    |   |   |   |   |
|         |                        |                      |          |          | 9      | 7    | 12.3752    | 7.0000    |                                                               |                         |    |    |   |   |   |   |
| FN1935  | -0.898                 | 4.272                |          |          | 3      |      | 3.2196     |           | AAL94034.1   Adenine-specific methyltransferase               |                         |    |    |   |   |   |   |
|         |                        |                      |          |          |        | 6    |            | 6.0000    |                                                               |                         |    |    |   |   |   |   |
| FN1939  | -0.699                 | 7.797                |          |          | 9      |      | 9.6588     |           | AAL94038.1   Hypothetical protein                             |                         |    |    |   |   |   |   |
|         |                        |                      |          |          | 10     | 19   | 13.7502    | 19.0000   |                                                               |                         |    |    |   |   |   |   |
| FN1941  | -1.674                 | 14.958               | 4.273e-6 | 1.14e-7  | 99     | 239  | 106.2464   | 327.4634  | AAL94040.1   ClpB protein                                     |                         |    |    |   |   |   |   |
|         |                        |                      |          |          | 68     | 310  | 93.5014    | 310.0000  |                                                               |                         |    |    |   |   |   |   |
| FN1942  |                        |                      |          |          |        | 8    |            | 10.9611   | AAL94041.1   putative DNA-binding protein                     |                         |    |    |   |   |   |   |
| FN1943  | -2.422                 | 22.014               | 5.062e-3 | 2.568e-3 | 828    | 4000 | 888.6061   | 5480.5594 | AAL94042.1   Tryptophanase                                    |                         |    |    |   |   |   |   |
|         |                        |                      |          |          | 647    | 4049 | 889.6384   | 4049.0000 |                                                               |                         |    |    |   |   |   |   |
| FN1948  |                        |                      |          |          |        | 7    |            | 7.0000    | AAL94044.1   Hypothetical protein                             |                         |    |    |   |   |   |   |
| FN1949  | -3.735                 | 7.824                |          |          |        | 24   |            | 32.8834   | AAL94045.1   Xaa-Pro dipeptidase                              |                         |    |    |   |   |   |   |
|         |                        |                      |          |          | 3      | 77   | 4.1251     | 77.0000   |                                                               |                         |    |    |   |   |   |   |
| FN1950  |                        |                      |          |          |        | 4    |            | 5.5001    | AAL94046.1   Serine protease                                  |                         |    |    |   |   |   |   |
| FN1956  |                        |                      |          |          |        | 15   |            | 15.0000   | AAL94052.1   Hypothetical protein                             |                         |    |    |   |   |   |   |
| FN1964  | -0.196                 | 8.237                | 1.749e-1 | 4.93e-1  | 20     | 14   | 21.4639    | 19.1820   | AAL94054.1   O-linked GLCNAC transferase                      |                         |    |    |   |   |   |   |
|         |                        |                      |          |          | 8      | 18   | 11.0002    | 18.0000   |                                                               |                         |    |    |   |   |   |   |
| FN1965  | -0.230                 | 11.179               | 1.057e-1 | 2.403e-1 | 47     | 44   | 50.4402    | 60.2862   | AAL94055.1   Tetratricopeptide repeat family protein          |                         |    |    |   |   |   |   |
|         |                        |                      |          |          | 28     | 44   | 38.5006    | 44.0000   |                                                               |                         |    |    |   |   |   |   |
| FN1966  | 0.792                  | 10.885               | 9.561e-3 | 7.033e-3 | 49     | 30   | 52.5866    | 41.1042   | AAL94056.1   Hypothetical protein                             |                         |    |    |   |   |   |   |
|         |                        |                      |          |          | 45     | 25   | 61.8759    | 25.0000   |                                                               |                         |    |    |   |   |   |   |
| FN1970  |                        |                      |          |          | 14     |      | 15.0247    |           | AAL94060.1   Hemin-binding periplasmic protein hmuT precursor |                         |    |    |   |   |   |   |
| FN1971  | -0.670                 | 9.749                |          |          | 19     |      | 20.3907    |           | AAL94061.1   Hemin receptor                                   |                         |    |    |   |   |   |   |
|         |                        |                      |          |          | 19     | 37   | 26.1254    | 37.0000   |                                                               |                         |    |    |   |   |   |   |
| FN1972  | -2.046                 | 9.816                |          |          | 16     |      | 17.1711    |           | AAL94062.1   unknown                                          |                         |    |    |   |   |   |   |
|         |                        |                      |          |          | 9      | 61   | 12.3752    | 61.0000   |                                                               |                         |    |    |   |   |   |   |

Show detected proteins only  
 Show all proteins  
 Filter by category:

Proteins found: 1305

Test Cutoff

| Signif | Direction | Applies To   |
|--------|-----------|--------------|
| yes    | +         | ratios, bars |
| no     | n/a       | bars         |
| yes    | -         | ratios, bars |
| yes    | +         | p-, q-Values |
| yes    | -         | p-, q-Values |

Fn Summary Table FnPg vs Fn FnSg vs Fn FnPgSg vs Fn FnPgSg vs FnPg FnSg vs FnPg FnPgSg vs FnSg Fn Coverage

| Protein | FnPgSg vs FnPg         |                      |          |          | Raw    |      | Normalized |          | Description                                           | Log <sub>2</sub> Ratios |    |    |   |   |   |   |
|---------|------------------------|----------------------|----------|----------|--------|------|------------|----------|-------------------------------------------------------|-------------------------|----|----|---|---|---|---|
|         | Log <sub>2</sub> Ratio | Log <sub>2</sub> Sum | q-Value  | p-Value  | FnPgSg | FnPg | FnPgSg     | FnPg     |                                                       | -6                      | -4 | -2 | 0 | 2 | 4 | 6 |
| FN1973  | 0.430                  | 14.638               | 8.101e-3 | 5.447e-3 | 166    | 111  | 178.1505   | 152.0855 | AAL94063.1  Translation initiation inhibitor          |                         |    |    |   |   |   |   |
|         |                        |                      |          |          | 140    | 123  | 192.5029   | 123.0000 |                                                       |                         |    |    |   |   |   |   |
| FN1975  | 0.746                  | 13.048               | 2.137e-3 | 7.62e-4  | 103    | 49   | 110.5392   | 67.1369  | AAL94065.1  ATP-dependent RNA helicase                |                         |    |    |   |   |   |   |
|         |                        |                      |          |          | 93     | 75   | 127.8769   | 75.0000  |                                                       |                         |    |    |   |   |   |   |
| FN1976  | -0.403                 | 9.223                | 2.016e-1 | 6.031e-1 | 14     | 6    | 15.0247    | 8.2208   | AAL94066.1  4-amino-4-deoxychorismate lyase           |                         |    |    |   |   |   |   |
|         |                        |                      |          |          | 20     | 48   | 27.5004    | 48.0000  |                                                       |                         |    |    |   |   |   |   |
| FN1977  | -1.160                 | 5.364                |          |          | 4      | 7    | 4.2928     | 9.5910   | AAL94067.1  Cell cycle protein MesJ                   |                         |    |    |   |   |   |   |
|         |                        |                      |          |          |        |      |            |          |                                                       |                         |    |    |   |   |   |   |
| FN1978  | 1.336                  | 13.142               | 1.571e-2 | 1.528e-2 | 129    | 18   | 138.4423   | 24.6625  | AAL94068.1  Cell division protein ftsH                |                         |    |    |   |   |   |   |
|         |                        |                      |          |          | 119    | 95   | 163.6275   | 95.0000  |                                                       |                         |    |    |   |   |   |   |
| FN1979  | 4.204                  | 11.772               | 2.512e-3 | 9.481e-4 | 204    | 15   | 218.9319   | 20.5521  | AAL94069.1  SSU ribosomal protein S15P                |                         |    |    |   |   |   |   |
|         |                        |                      |          |          | 210    | 7    | 288.7544   | 7.0000   |                                                       |                         |    |    |   |   |   |   |
| FN1980  |                        |                      |          |          |        |      |            |          | AAL94070.1  Transporter                               |                         |    |    |   |   |   |   |
|         |                        |                      |          |          | 3      |      | 4.1251     |          |                                                       |                         |    |    |   |   |   |   |
| FN1983  | 1.624                  | 17.136               | 1.102e-3 | 2.838e-4 | 564    | 139  | 605.2824   | 190.4494 | AAL94073.1  Alkyl hydroperoxide reductase C22 protein |                         |    |    |   |   |   |   |
|         |                        |                      |          |          | 529    | 242  | 727.3860   | 242.0000 |                                                       |                         |    |    |   |   |   |   |
| FN1984  | 0.309                  | 17.296               | 1.223e-1 | 2.988e-1 | 376    | 348  | 403.5216   | 476.8087 | AAL94074.1  Thioredoxin reductase                     |                         |    |    |   |   |   |   |
|         |                        |                      |          |          | 356    | 244  | 489.5074   | 244.0000 |                                                       |                         |    |    |   |   |   |   |
| FN1985  | -0.134                 | 11.973               | 2.613e-1 | 8.482e-1 | 50     | 13   | 53.6598    | 17.8118  | AAL94075.1  Inner membrane protein                    |                         |    |    |   |   |   |   |
|         |                        |                      |          |          | 49     | 115  | 67.3760    | 115.0000 |                                                       |                         |    |    |   |   |   |   |
| FN1986  | -0.356                 | 16.065               | 6.746e-2 | 1.227e-1 | 234    | 255  | 251.1278   | 349.3857 | AAL94076.1  Hypothetical protein                      |                         |    |    |   |   |   |   |
|         |                        |                      |          |          | 154    | 243  | 211.7532   | 243.0000 |                                                       |                         |    |    |   |   |   |   |
| FN1987  | -2.667                 | 7.160                |          |          | 5      | 22   | 5.3660     | 30.1431  | AAL94077.1  Transcriptional regulator, GntR family    |                         |    |    |   |   |   |   |
|         |                        |                      |          |          | 3      |      | 4.1251     |          |                                                       |                         |    |    |   |   |   |   |
| FN1988  | -2.609                 | 16.039               | 4.636e-2 | 7.101e-2 | 92     | 221  | 98.7340    | 302.8009 | AAL94078.1  Tyrosine phenol-lyase                     |                         |    |    |   |   |   |   |
|         |                        |                      |          |          | 81     | 979  | 111.3767   | 979.0000 |                                                       |                         |    |    |   |   |   |   |
| FN1989  |                        |                      |          |          |        |      |            |          | AAL94079.1  Sodium-dependent tyrosine transporter     |                         |    |    |   |   |   |   |
|         |                        |                      |          |          |        | 16   |            | 16.0000  |                                                       |                         |    |    |   |   |   |   |
| FN1991  | -0.159                 | 17.343               | 3.886e-2 | 5.53e-2  | 349    | 334  | 374.5453   | 457.6267 | AAL94081.1  Glucosamine-1-phosphate acetyltransferase |                         |    |    |   |   |   |   |
|         |                        |                      |          |          | 289    | 404  | 397.3810   | 404.0000 |                                                       |                         |    |    |   |   |   |   |
| FN1992  | -0.845                 | 16.012               | 1.1e-2   | 8.775e-3 | 173    | 219  | 185.6629   | 300.0606 | AAL94082.1  Ribose-phosphate pyrophosphokinase        |                         |    |    |   |   |   |   |
|         |                        |                      |          |          | 144    | 389  | 198.0030   | 389.0000 |                                                       |                         |    |    |   |   |   |   |

Show detected proteins only  
 Show all proteins  
 Filter by category:

Proteins found:  
1305

Test Cutoff

| Signif | Direction | Applies To   |
|--------|-----------|--------------|
| yes    | +         | ratios, bars |
| no     | n/a       | bars         |
| yes    | -         | ratios, bars |
| yes    | +         | p-, q-Values |
| yes    | -         |              |

Fn Summary Table FnPg vs Fn FnSg vs Fn FnPgSg vs Fn FnPgSg vs FnPg FnSg vs FnPg FnPgSg vs FnSg Fn Coverage

| Protein       | FnPgSg vs FnPg         |                      |          |          | Raw    |      | Normalized |          | Description                                                          | Log <sub>2</sub> Ratios |    |    |   |   |   |   |
|---------------|------------------------|----------------------|----------|----------|--------|------|------------|----------|----------------------------------------------------------------------|-------------------------|----|----|---|---|---|---|
|               | Log <sub>2</sub> Ratio | Log <sub>2</sub> Sum | q-Value  | p-Value  | FnPgSg | FnPg | FnPgSg     | FnPg     |                                                                      | -6                      | -4 | -2 | 0 | 2 | 4 | 6 |
| <b>FN1993</b> | 0.196                  | 5.366                |          |          |        |      |            |          | AAL94083.1  SUA5 protein                                             |                         |    |    |   |   |   |   |
|               |                        |                      |          |          | 5      | 6    | 6.8751     | 6.0000   |                                                                      |                         |    |    |   |   |   |   |
| <b>FN1994</b> | -0.235                 | 11.134               | 2.212e-1 | 6.809e-1 | 43     | 59   | 46.1474    | 80.8383  | AAL94084.1  Hypothetical protein                                     |                         |    |    |   |   |   |   |
|               |                        |                      |          |          | 30     | 22   | 41.2506    | 22.0000  |                                                                      |                         |    |    |   |   |   |   |
| <b>FN1995</b> | 2.161                  | 6.161                |          |          | 9      |      | 9.6588     |          | AAL94085.1  Hypothetical protein                                     |                         |    |    |   |   |   |   |
|               |                        |                      |          |          | 19     | 4    | 26.1254    | 4.0000   |                                                                      |                         |    |    |   |   |   |   |
| <b>FN2001</b> |                        |                      |          |          |        |      |            |          | AAL94091.1  Hypothetical protein                                     |                         |    |    |   |   |   |   |
|               |                        |                      |          |          |        | 20   |            | 20.0000  |                                                                      |                         |    |    |   |   |   |   |
| <b>FN2007</b> | -1.027                 | 6.324                | 1.069e-1 | 2.45e-1  | 4      | 15   | 4.2928     | 20.5521  | AAL94097.1  Glutathione peroxidase                                   |                         |    |    |   |   |   |   |
|               |                        |                      |          |          | 6      | 5    | 8.2501     | 5.0000   |                                                                      |                         |    |    |   |   |   |   |
| <b>FN2008</b> |                        |                      |          |          |        |      |            |          | AAL94098.1  Glycine betaine transport ATP-binding protein            |                         |    |    |   |   |   |   |
|               |                        |                      |          |          |        | 19   |            | 19.0000  |                                                                      |                         |    |    |   |   |   |   |
| <b>FN2009</b> |                        |                      |          |          |        |      |            |          | AAL94099.1  Glycine betaine transport system permease protein        |                         |    |    |   |   |   |   |
|               |                        |                      |          |          |        | 8    |            | 8.0000   |                                                                      |                         |    |    |   |   |   |   |
| <b>FN2011</b> | 0.379                  | 13.053               | 1.128e-1 | 2.655e-1 | 87     | 37   | 93.3680    | 50.6952  | AAL94101.1  Valyl-tRNA synthetase                                    |                         |    |    |   |   |   |   |
|               |                        |                      |          |          | 85     | 111  | 116.8768   | 111.0000 |                                                                      |                         |    |    |   |   |   |   |
| <b>FN2013</b> |                        |                      |          |          |        |      |            |          | AAL94103.1  GTP-binding protein                                      |                         |    |    |   |   |   |   |
|               |                        |                      |          |          |        | 5    |            | 5.0000   |                                                                      |                         |    |    |   |   |   |   |
| <b>FN2014</b> | 0.531                  | 14.339               | 5.067e-3 | 2.571e-3 | 152    | 77   | 163.1258   | 105.5008 | AAL94104.1  ATP-dependent protease La                                |                         |    |    |   |   |   |   |
|               |                        |                      |          |          | 133    | 134  | 182.8778   | 134.0000 |                                                                      |                         |    |    |   |   |   |   |
| <b>FN2015</b> | 0.061                  | 12.857               | 1.945e-1 | 5.725e-1 | 73     | 64   | 78.3433    | 87.6890  | AAL94105.1  ATP-dependent clp protease ATP-binding subunit clpX      |                         |    |    |   |   |   |   |
|               |                        |                      |          |          | 71     | 81   | 97.6265    | 81.0000  |                                                                      |                         |    |    |   |   |   |   |
| <b>FN2016</b> | 0.540                  | 10.256               |          |          | 35     |      | 37.5619    |          | AAL94106.1  ATP-dependent Clp protease proteolytic subunit           |                         |    |    |   |   |   |   |
|               |                        |                      |          |          | 34     | 29   | 46.7507    | 29.0000  |                                                                      |                         |    |    |   |   |   |   |
| <b>FN2017</b> | 0.549                  | 18.938               | 3.72e-2  | 5.202e-2 | 711    | 543  | 763.0422   | 743.9859 | AAL94107.1  Trigger factor, ppiase                                   |                         |    |    |   |   |   |   |
|               |                        |                      |          |          | 692    | 428  | 951.5143   | 428.0000 |                                                                      |                         |    |    |   |   |   |   |
| <b>FN2018</b> | 1.108                  | 8.570                | 2.515e-2 | 2.937e-2 | 29     | 15   | 31.1227    | 20.5521  | AAL94108.1  Single-stranded-DNA-specific exonuclease recJ            |                         |    |    |   |   |   |   |
|               |                        |                      |          |          | 19     | 6    | 26.1254    | 6.0000   |                                                                      |                         |    |    |   |   |   |   |
| <b>FN2019</b> | -0.432                 | 10.192               |          |          | 19     | 29   | 20.3907    | 39.7341  | AAL94109.1  Ribosome-binding factor A                                |                         |    |    |   |   |   |   |
|               |                        |                      |          |          | 28     |      | 38.5006    |          |                                                                      |                         |    |    |   |   |   |   |
| <b>FN2020</b> | 0.058                  | 15.945               | 1.263e-1 | 3.136e-1 | 243    | 190  | 260.7866   | 260.3266 | AAL94110.1  Bacterial Protein Translation Initiation Factor 2 (IF-2) |                         |    |    |   |   |   |   |
|               |                        |                      |          |          | 183    | 232  | 251.6288   | 232.0000 |                                                                      |                         |    |    |   |   |   |   |

Show detected proteins only  
 Show all proteins  
 Filter by category:

Proteins found: 1305

Test Cutoff

| Signif | Direction | Applies To   |
|--------|-----------|--------------|
| yes    | +         | ratios, bars |
| no     | n/a       | bars         |
| yes    | -         | ratios, bars |
| yes    | +         | p-, q-Values |
| yes    | -         |              |

Fn Summary Table FnPg vs Fn FnSg vs Fn FnPgSg vs Fn FnPgSg vs FnPg FnSg vs FnPg FnPgSg vs FnSg Fn Coverage

| Protein | FnPgSg vs FnPg         |                      |          |          | Raw    |      | Normalized |           | Description                                             | Log <sub>2</sub> Ratios |    |    |   |   |   |   |
|---------|------------------------|----------------------|----------|----------|--------|------|------------|-----------|---------------------------------------------------------|-------------------------|----|----|---|---|---|---|
|         | Log <sub>2</sub> Ratio | Log <sub>2</sub> Sum | q-Value  | p-Value  | FnPgSg | FnPg | FnPgSg     | FnPg      |                                                         | -6                      | -4 | -2 | 0 | 2 | 4 | 6 |
| FN2022  | 0.518                  | 11.948               | 3.487e-5 | 1.551e-6 | 71     | 38   | 76.1969    | 52.0653   | AAL94112.1  N utilization substance protein A           |                         |    |    |   |   |   |   |
|         |                        |                      |          |          | 54     | 53   | 74.2511    | 53.0000   |                                                         |                         |    |    |   |   |   |   |
| FN2023  | -0.526                 | 7.510                | 1.771e-1 | 5.018e-1 | 12     | 20   | 12.8783    | 27.4028   | AAL94113.1  Hypothetical cytosolic protein              |                         |    |    |   |   |   |   |
|         |                        |                      |          |          | 7      | 5    | 9.6251     | 5.0000    |                                                         |                         |    |    |   |   |   |   |
| FN2030  | 2.142                  | 12.663               | 2.631e-4 | 3.529e-5 | 150    | 18   | 160.9794   | 24.6625   | AAL94115.1  Inorganic pyrophosphatase                   |                         |    |    |   |   |   |   |
|         |                        |                      |          |          | 129    | 52   | 177.3777   | 52.0000   |                                                         |                         |    |    |   |   |   |   |
| FN2031  | 1.255                  | 6.164                |          |          | 9      | 4    | 9.6588     | 5.4806    | AAL94116.1  Thiamine biosynthesis lipoprotein appE      |                         |    |    |   |   |   |   |
|         |                        |                      |          |          | 12     |      | 16.5002    |           |                                                         |                         |    |    |   |   |   |   |
| FN2033  |                        |                      |          |          |        | 15   |            | 20.5521   | AAL94118.1  Guanylate kinase                            |                         |    |    |   |   |   |   |
| FN2034  | 0.987                  | 9.218                | 2.408e-2 | 2.759e-2 | 32     | 18   | 34.3423    | 24.6625   | AAL94119.1  Protein yicC                                |                         |    |    |   |   |   |   |
|         |                        |                      |          |          | 25     | 10   | 34.3755    | 10.0000   |                                                         |                         |    |    |   |   |   |   |
| FN2035  | 0.036                  | 17.698               | 2.41e-1  | 7.613e-1 | 418    | 375  | 448.5958   | 513.8024  | AAL94120.1  DNA-directed RNA polymerase beta' chain     |                         |    |    |   |   |   |   |
|         |                        |                      |          |          | 353    | 397  | 485.3823   | 397.0000  |                                                         |                         |    |    |   |   |   |   |
| FN2036  | 0.358                  | 16.689               | 6.347e-2 | 1.131e-1 | 327    | 163  | 350.9350   | 223.3328  | AAL94121.1  DNA-directed RNA polymerase beta chain      |                         |    |    |   |   |   |   |
|         |                        |                      |          |          | 280    | 351  | 385.0058   | 351.0000  |                                                         |                         |    |    |   |   |   |   |
| FN2037  | 2.416                  | 22.416               | 1.069e-3 | 2.693e-4 | 4959   | 1107 | 5321.9777  | 1516.7448 | AAL94122.1  LSU ribosomal protein L12P (L7/L12)         |                         |    |    |   |   |   |   |
|         |                        |                      |          |          | 4077   | 531  | 5605.9595  | 531.0000  |                                                         |                         |    |    |   |   |   |   |
| FN2038  | 1.072                  | 16.309               | 2.7e-2   | 3.258e-2 | 383    | 216  | 411.0340   | 295.9502  | AAL94123.1  LSU ribosomal protein L10P                  |                         |    |    |   |   |   |   |
|         |                        |                      |          |          | 302    | 97   | 415.2563   | 97.0000   |                                                         |                         |    |    |   |   |   |   |
| FN2039  | 0.322                  | 16.555               | 3.595e-3 | 1.615e-3 | 316    | 214  | 339.1299   | 293.2099  | AAL94124.1  LSU ribosomal protein L1P                   |                         |    |    |   |   |   |   |
|         |                        |                      |          |          | 258    | 262  | 354.7553   | 262.0000  |                                                         |                         |    |    |   |   |   |   |
| FN2040  | 2.026                  | 13.565               | 5.44e-4  | 1.016e-4 | 223    | 57   | 239.3227   | 78.0980   | AAL94125.1  LSU ribosomal protein L11P                  |                         |    |    |   |   |   |   |
|         |                        |                      |          |          | 149    | 31   | 204.8781   | 31.0000   |                                                         |                         |    |    |   |   |   |   |
| FN2041  | -1.166                 | 11.436               | 9.352e-2 | 1.971e-1 | 36     | 91   | 38.6350    | 124.6827  | AAL94126.1  Transcription antitermination protein nusG  |                         |    |    |   |   |   |   |
|         |                        |                      |          |          | 23     | 33   | 31.6255    | 33.0000   |                                                         |                         |    |    |   |   |   |   |
| FN2045  |                        |                      |          |          |        | 18   |            | 18.0000   | AAL94129.1  Ferric uptake regulation protein            |                         |    |    |   |   |   |   |
| FN2046  |                        |                      |          |          |        | 24   |            | 24.0000   | AAL94130.1  Acetyltransferase                           |                         |    |    |   |   |   |   |
| FN2047  | 0.226                  | 13.426               | 1.36e-1  | 3.511e-1 | 91     | 54   | 97.6608    | 73.9876   | AAL94131.1  Fusobacterium outer membrane protein family |                         |    |    |   |   |   |   |
|         |                        |                      |          |          | 94     | 120  | 129.2519   | 120.0000  |                                                         |                         |    |    |   |   |   |   |

Show detected proteins only  
 Show all proteins  
 Filter by category:

Proteins found: 1305

Enter (or paste) list of ORFs

Find ORFs

Test Cutoff

q-Value

p-Value

.005

| Signif | Direction | Applies To   |
|--------|-----------|--------------|
| yes    | +         | ratios, bars |
| no     | n/a       | bars         |
| yes    | -         | ratios, bars |
| yes    | +         | p-, q-Values |
| yes    | -         | p-, q-Values |

Dot Plots

Fn Summary Table FnPg vs Fn FnSg vs Fn FnPgSg vs Fn FnPgSg vs FnPg FnSg vs FnPg FnPgSg vs FnSg Fn Coverage

| Protein | FnPgSg vs FnPg         |                      |          |          | Raw    |      |          |           | Normalized                                              |      |        |      | Description | Log <sub>2</sub> Ratios |    |    |   |   |   |   |
|---------|------------------------|----------------------|----------|----------|--------|------|----------|-----------|---------------------------------------------------------|------|--------|------|-------------|-------------------------|----|----|---|---|---|---|
|         | Log <sub>2</sub> Ratio | Log <sub>2</sub> Sum | q-Value  | p-Value  | FnPgSg | FnPg | FnPgSg   | FnPg      | FnPgSg                                                  | FnPg | FnPgSg | FnPg |             | -6                      | -4 | -2 | 0 | 2 | 4 | 6 |
| FN2048  | 0.488                  | 15.687               |          |          | 234    |      | 251.1278 |           |                                                         |      |        |      |             |                         |    |    |   |   |   |   |
|         |                        |                      |          |          | 213    | 194  | 292.8794 | 194.0000  | AAL94132.1  Outer membrane protein                      |      |        |      |             |                         |    |    |   |   |   |   |
| FN2049  | -1.438                 | 17.551               | 5.197e-2 | 8.444e-2 | 231    | 753  | 247.9082 | 1031.7153 |                                                         |      |        |      |             |                         |    |    |   |   |   |   |
|         |                        |                      |          |          | 207    | 411  | 284.6293 | 411.0000  | AAL94133.1  unknown                                     |      |        |      |             |                         |    |    |   |   |   |   |
| FN2050  | 0.257                  | 15.544               | 2.138e-1 | 6.518e-1 | 175    | 240  | 187.8093 | 328.8336  |                                                         |      |        |      |             |                         |    |    |   |   |   |   |
|         |                        |                      |          |          | 211    | 71   | 290.1294 | 71.0000   | AAL94134.1  Hypothetical membrane-spanning protein      |      |        |      |             |                         |    |    |   |   |   |   |
| FN2051  | 0.652                  | 13.840               | 7.563e-2 | 1.439e-1 | 142    | 106  | 152.3938 | 145.2348  |                                                         |      |        |      |             |                         |    |    |   |   |   |   |
|         |                        |                      |          |          | 110    | 48   | 151.2523 | 48.0000   | AAL94135.1  unknown                                     |      |        |      |             |                         |    |    |   |   |   |   |
| FN2052  | 0.814                  | 13.456               | 5.184e-2 | 8.412e-2 | 121    | 89   | 129.8567 | 121.9424  |                                                         |      |        |      |             |                         |    |    |   |   |   |   |
|         |                        |                      |          |          | 110    | 38   | 151.2523 | 38.0000   | AAL94136.1  unknown                                     |      |        |      |             |                         |    |    |   |   |   |   |
| FN2053  | 0.872                  | 12.941               | 2.047e-2 | 2.193e-2 | 98     | 30   | 105.1732 | 41.1042   |                                                         |      |        |      |             |                         |    |    |   |   |   |   |
|         |                        |                      |          |          | 98     | 90   | 134.7520 | 90.0000   | AAL94137.1  Serine/threonine sodium symporter           |      |        |      |             |                         |    |    |   |   |   |   |
| FN2054  | 0.661                  | 15.070               | 3.764e-4 | 5.696e-5 | 227    | 100  | 243.6154 | 137.0140  |                                                         |      |        |      |             |                         |    |    |   |   |   |   |
|         |                        |                      |          |          | 162    | 158  | 222.7534 | 158.0000  | AAL94138.1  Glucose-6-phosphate isomerase               |      |        |      |             |                         |    |    |   |   |   |   |
| FN2058  | -1.075                 | 17.602               | 7.17e-2  | 1.335e-1 | 269    | 683  | 288.6897 | 935.8055  |                                                         |      |        |      |             |                         |    |    |   |   |   |   |
|         |                        |                      |          |          | 237    | 359  | 325.8799 | 359.0000  | AAL94142.1  Fusobacterium outer membrane protein family |      |        |      |             |                         |    |    |   |   |   |   |
| FN2059  | 0.488                  | 15.687               |          |          | 234    |      | 251.1278 |           |                                                         |      |        |      |             |                         |    |    |   |   |   |   |
|         |                        |                      |          |          | 213    | 194  | 292.8794 | 194.0000  | AAL94143.1  Outer membrane protein                      |      |        |      |             |                         |    |    |   |   |   |   |
| FN2060  | -1.438                 | 17.551               | 5.197e-2 | 8.444e-2 | 231    | 753  | 247.9082 | 1031.7153 |                                                         |      |        |      |             |                         |    |    |   |   |   |   |
|         |                        |                      |          |          | 207    | 411  | 284.6293 | 411.0000  | AAL94144.1  unknown                                     |      |        |      |             |                         |    |    |   |   |   |   |
| FN2061  | 0.257                  | 15.544               | 2.138e-1 | 6.518e-1 | 175    | 240  | 187.8093 | 328.8336  |                                                         |      |        |      |             |                         |    |    |   |   |   |   |
|         |                        |                      |          |          | 211    | 71   | 290.1294 | 71.0000   | AAL94145.1  Hypothetical membrane-spanning protein      |      |        |      |             |                         |    |    |   |   |   |   |
| FN2062  | 0.652                  | 13.840               | 7.563e-2 | 1.439e-1 | 142    | 106  | 152.3938 | 145.2348  |                                                         |      |        |      |             |                         |    |    |   |   |   |   |
|         |                        |                      |          |          | 110    | 48   | 151.2523 | 48.0000   | AAL94146.1  unknown                                     |      |        |      |             |                         |    |    |   |   |   |   |
| FN2063  | 0.814                  | 13.456               | 5.184e-2 | 8.412e-2 | 121    | 89   | 129.8567 | 121.9424  |                                                         |      |        |      |             |                         |    |    |   |   |   |   |
|         |                        |                      |          |          | 110    | 38   | 151.2523 | 38.0000   | AAL94147.1  unknown                                     |      |        |      |             |                         |    |    |   |   |   |   |
| FN2067  |                        |                      |          |          | 10     |      | 10.7320  |           |                                                         |      |        |      |             |                         |    |    |   |   |   |   |
|         |                        |                      |          |          | 13     |      | 17.8753  |           | AAL94151.1  Thiol:disulfide interchange protein tlpA    |      |        |      |             |                         |    |    |   |   |   |   |
| FN2068  | -2.271                 | 6.475                |          |          | 4      | 12   | 4.2928   | 16.4417   |                                                         |      |        |      |             |                         |    |    |   |   |   |   |
|         |                        |                      |          |          |        |      | 25       | 25.0000   | AAL94152.1  dGTP triphosphohydrolase                    |      |        |      |             |                         |    |    |   |   |   |   |
| FN2070  | -1.358                 | 5.561                |          |          | 4      |      | 4.2928   |           |                                                         |      |        |      |             |                         |    |    |   |   |   |   |
|         |                        |                      |          |          |        | 11   | 11.0000  |           | AAL94154.1  Cobyric acid synthase                       |      |        |      |             |                         |    |    |   |   |   |   |

Show detected proteins only  
 Show all proteins  
 Filter by category:

Proteins found:  
1305

Test Cutoff

| Signif | Direction | Applies To   |
|--------|-----------|--------------|
| yes    | +         | ratios, bars |
| no     | n/a       | bars         |
| yes    | -         | ratios, bars |
| yes    | +         | p-, q-Values |
| yes    | -         |              |



Fn Summary Table FnPg vs Fn FnSg vs Fn FnPgSg vs Fn FnPgSg vs FnPg FnSg vs FnPg FnPgSg vs FnSg Fn Coverage

| Protein | FnPgSg vs FnPg         |                      |          |          | Raw    |      | Normalized |           | Description                                                | Log <sub>2</sub> Ratios |    |    |   |   |   |   |
|---------|------------------------|----------------------|----------|----------|--------|------|------------|-----------|------------------------------------------------------------|-------------------------|----|----|---|---|---|---|
|         | Log <sub>2</sub> Ratio | Log <sub>2</sub> Sum | q-Value  | p-Value  | FnPgSg | FnPg | FnPgSg     | FnPg      |                                                            | -6                      | -4 | -2 | 0 | 2 | 4 | 6 |
| FN2073  | -1.325                 | 8.288                | 8.984e-2 | 1.853e-1 | 8      | 8    | 8.5856     | 10.9611   | AAL94157.1  Adenine phosphoribosyltransferase              |                         |    |    |   |   |   |   |
|         |                        |                      |          |          | 10     | 45   | 13.7502    | 45.0000   |                                                            |                         |    |    |   |   |   |   |
| FN2074  | 0.874                  | 4.044                |          |          |        |      |            |           | AAL94158.1  BslIM                                          |                         |    |    |   |   |   |   |
|         |                        |                      |          |          | 4      | 3    | 5.5001     | 3.0000    |                                                            |                         |    |    |   |   |   |   |
| FN2075  | 0.620                  | 9.329                | 3.111e-2 | 4.011e-2 | 24     | 16   | 25.7567    | 21.9222   | AAL94159.1  Hypothetical protein                           |                         |    |    |   |   |   |   |
|         |                        |                      |          |          | 27     | 19   | 37.1256    | 19.0000   |                                                            |                         |    |    |   |   |   |   |
| FN2076  |                        |                      |          |          |        |      |            |           | AAL94160.1  MunI regulatory protein                        |                         |    |    |   |   |   |   |
|         |                        |                      |          |          | 3      |      | 4.1251     |           |                                                            |                         |    |    |   |   |   |   |
| FN2078  |                        |                      |          |          |        |      |            |           | AAL94162.1  Transcriptional regulator, DeoR family         |                         |    |    |   |   |   |   |
|         |                        |                      |          |          |        |      | 3          | 3.0000    |                                                            |                         |    |    |   |   |   |   |
| FN2082  | -0.060                 | 20.845               | 2.705e-1 | 8.89e-1  | 1557   | 599  | 1670.9658  | 820.7138  | AAL94166.1  Formate--tetrahydrofolate ligase               |                         |    |    |   |   |   |   |
|         |                        |                      |          |          | 740    | 1981 | 1017.5153  | 1981.0000 |                                                            |                         |    |    |   |   |   |   |
| FN2093  | 0.035                  | 9.642                | 2.836e-1 | 9.489e-1 | 20     | 32   | 21.4639    | 43.8445   | AAL94177.1  General secretion pathway protein G            |                         |    |    |   |   |   |   |
|         |                        |                      |          |          | 26     | 12   | 35.7505    | 12.0000   |                                                            |                         |    |    |   |   |   |   |
| FN2098  | -1.026                 | 4.400                |          |          | 3      | 3    | 3.2196     | 4.1104    | AAL94182.1  MRP-family nucleotide-binding protein          |                         |    |    |   |   |   |   |
|         |                        |                      |          |          |        |      | 9          | 9.0000    |                                                            |                         |    |    |   |   |   |   |
| FN2100  | 0.521                  | 10.477               | 2.095e-2 | 2.267e-2 | 42     | 19   | 45.0742    | 26.0327   | AAL94184.1  Hypothetical protein                           |                         |    |    |   |   |   |   |
|         |                        |                      |          |          | 33     | 37   | 45.3757    | 37.0000   |                                                            |                         |    |    |   |   |   |   |
| FN2102  | -0.784                 | 7.298                | 7.281e-2 | 1.364e-1 | 5      | 16   | 5.3660     | 21.9222   | AAL94186.1  ABC transporter ATP-binding protein            |                         |    |    |   |   |   |   |
|         |                        |                      |          |          | 10     | 11   | 13.7502    | 11.0000   |                                                            |                         |    |    |   |   |   |   |
| FN2103  | 0.230                  | 19.069               | 1.024e-1 | 2.28e-1  | 788    | 598  | 845.6783   | 819.3436  | AAL94187.1  tricarboxylate-binding protein                 |                         |    |    |   |   |   |   |
|         |                        |                      |          |          | 553    | 550  | 760.3865   | 550.0000  |                                                            |                         |    |    |   |   |   |   |
| FN2105  | 0.851                  | 6.466                |          |          | 12     |      | 12.8783    |           | AAL94189.1  tricarboxylate transport membrane protein RctA |                         |    |    |   |   |   |   |
|         |                        |                      |          |          | 9      | 7    | 12.3752    | 7.0000    |                                                            |                         |    |    |   |   |   |   |
| FN2106  | -0.814                 | 14.771               | 1.085e-1 | 2.51e-1  | 112    | 247  | 120.1979   | 338.4245  | AAL94190.1  Transporter                                    |                         |    |    |   |   |   |   |
|         |                        |                      |          |          | 96     | 105  | 132.0020   | 105.0000  |                                                            |                         |    |    |   |   |   |   |
| FN2107  | 0.891                  | 10.878               | 5.318e-2 | 8.754e-2 | 55     | 37   | 59.0258    | 50.6952   | AAL94191.1  Galactokinase                                  |                         |    |    |   |   |   |   |
|         |                        |                      |          |          | 43     | 13   | 59.1259    | 13.0000   |                                                            |                         |    |    |   |   |   |   |
| FN2108  | 0.547                  | 9.658                | 7.714e-3 | 4.98e-3  | 32     | 19   | 34.3423    | 26.0327   | AAL94192.1  Galactose-1-phosphate uridylyltransferase      |                         |    |    |   |   |   |   |
|         |                        |                      |          |          | 25     | 21   | 34.3755    | 21.0000   |                                                            |                         |    |    |   |   |   |   |
| FN2109  | -0.171                 | 12.235               | 1.342e-1 | 3.441e-1 | 63     | 63   | 67.6113    | 86.3188   | AAL94193.1  UDP-glucose 4-epimerase                        |                         |    |    |   |   |   |   |
|         |                        |                      |          |          | 46     | 61   | 63.2510    | 61.0000   |                                                            |                         |    |    |   |   |   |   |

Show detected proteins only  
 Show all proteins  
 Filter by category:

Proteins found: 1305

Enter (or paste) list of ORFs

Find ORFs

Test Cutoff

q-Value

p-Value

.005

| Signif | Direction | Applies To   |
|--------|-----------|--------------|
| yes    | +         | ratios, bars |
| no     | n/a       | bars         |
| yes    | -         | ratios, bars |
| yes    | +         | p-, q-Values |
| yes    | -         | p-, q-Values |

Dot Plots Dot Plots

Fn Summary Table FnPg vs Fn FnSg vs Fn FnPgSg vs Fn FnPgSg vs FnPg FnSg vs FnPg FnPgSg vs FnSg Fn Coverage

| Protein | FnPgSg vs FnPg         |                      |          |          | Raw    |      |          |          | Normalized                                                     |      |        |      | Description | Log <sub>2</sub> Ratios |    |    |   |   |   |   |
|---------|------------------------|----------------------|----------|----------|--------|------|----------|----------|----------------------------------------------------------------|------|--------|------|-------------|-------------------------|----|----|---|---|---|---|
|         | Log <sub>2</sub> Ratio | Log <sub>2</sub> Sum | q-Value  | p-Value  | FnPgSg | FnPg | FnPgSg   | FnPg     | FnPgSg                                                         | FnPg | FnPgSg | FnPg |             | -6                      | -4 | -2 | 0 | 2 | 4 | 6 |
| FN2116  | -2.030                 | 7.258                |          |          | 5      |      | 5.3660   |          | AAL94200.1  Hypothetical exported 24-amino acid repeat protein |      |        |      |             |                         |    |    |   |   |   |   |
|         |                        |                      |          |          | 5      | 25   | 6.8751   | 25.0000  |                                                                |      |        |      |             |                         |    |    |   |   |   |   |
| FN2117  |                        |                      |          |          |        |      |          |          | AAL94201.1  Hypothetical exported 24-amino acid repeat protein |      |        |      |             |                         |    |    |   |   |   |   |
|         |                        |                      |          |          |        | 6    |          | 6.0000   |                                                                |      |        |      |             |                         |    |    |   |   |   |   |
| FN2118  | 1.444                  | 7.059                |          |          | 15     |      | 16.0979  |          | AAL94202.1  Hypothetical exported 24-amino acid repeat protein |      |        |      |             |                         |    |    |   |   |   |   |
|         |                        |                      |          |          | 16     | 7    | 22.0003  | 7.0000   |                                                                |      |        |      |             |                         |    |    |   |   |   |   |
| FN2119  | -0.996                 | 9.500                |          |          | 15     |      | 16.0979  |          | AAL94203.1  Hypothetical exported 24-amino acid repeat protein |      |        |      |             |                         |    |    |   |   |   |   |
|         |                        |                      |          |          | 16     | 38   | 22.0003  | 38.0000  |                                                                |      |        |      |             |                         |    |    |   |   |   |   |
| FN2121  | 0.317                  | 12.713               | 2.038e-1 | 6.13e-1  | 91     | 94   | 97.6608  | 128.7931 | AAL94205.1  Hypothetical exported 24-amino acid repeat protein |      |        |      |             |                         |    |    |   |   |   |   |
|         |                        |                      |          |          | 62     | 18   | 85.2513  | 18.0000  |                                                                |      |        |      |             |                         |    |    |   |   |   |   |
| FN2122  | -0.487                 | 16.941               | 3.608e-2 | 4.988e-2 | 297    | 356  | 318.7391 | 487.7698 | AAL94206.1  Phenylalanyl-tRNA synthetase beta chain            |      |        |      |             |                         |    |    |   |   |   |   |
|         |                        |                      |          |          | 204    | 352  | 280.5042 | 352.0000 |                                                                |      |        |      |             |                         |    |    |   |   |   |   |
| FN2123  | -0.606                 | 12.629               | 1.18e-1  | 2.833e-1 | 60     | 39   | 64.3917  | 53.4355  | AAL94207.1  Phenylalanyl-tRNA synthetase alpha chain           |      |        |      |             |                         |    |    |   |   |   |   |
|         |                        |                      |          |          | 47     | 143  | 64.6260  | 143.0000 |                                                                |      |        |      |             |                         |    |    |   |   |   |   |
| FN2125  | -0.458                 | 12.308               | 1.447e-1 | 3.824e-1 | 53     | 89   | 56.8794  | 121.9424 | AAL94209.1  DNA gyrase subunit A                               |      |        |      |             |                         |    |    |   |   |   |   |
|         |                        |                      |          |          | 47     | 45   | 64.6260  | 45.0000  |                                                                |      |        |      |             |                         |    |    |   |   |   |   |
| FN2126  | 1.530                  | 11.374               | 1.21e-4  | 1.281e-5 | 85     | 26   | 91.2216  | 35.6236  | AAL94210.1  DNA gyrase subunit B                               |      |        |      |             |                         |    |    |   |   |   |   |
|         |                        |                      |          |          | 61     | 25   | 83.8763  | 25.0000  |                                                                |      |        |      |             |                         |    |    |   |   |   |   |

- Show detected proteins only
- Show all proteins

Proteins found: 1305

Filter by category:

GO: amino acid transport

Enter (or paste) list of ORFs

Find ORFs

Test

q-Value

p-Value

Cutoff

.005

| Signif | Direction | Applies To   |
|--------|-----------|--------------|
| yes    | +         | ratios, bars |
| no     | n/a       | bars         |
| yes    | -         | ratios, bars |
| yes    | +         | p-, q-Values |
| yes    | -         | p-, q-Values |

Dot Plots Dot Plots
