# Supplementary material for: Proteomics of Fusobacterium nucleatum within a model developing oral microbial community
Source: PubMed Central journal article supplement (PMC4234264; doi:10.1002/mbo3.204), 2014-08-25
Supplement: mbo30003-0729-sd11.pdf [file mbo30003-0729-sd11.pdf]

| ORF    | FnPg vs Fn                                                         |        |          |          | FnSg vs Fn |        |          |          | FnPgSg vs Fn |        |          |          | FnPgSg vs FnPg |        |          |          | FnSg vs FnPg |        |          |          | FnPgSg vs FnSg |        |          |          | Log <sub>2</sub> Ratios |     |       |       |    |    |    |   |   |   |   |  |
|--------|--------------------------------------------------------------------|--------|----------|----------|------------|--------|----------|----------|--------------|--------|----------|----------|----------------|--------|----------|----------|--------------|--------|----------|----------|----------------|--------|----------|----------|-------------------------|-----|-------|-------|----|----|----|---|---|---|---|--|
|        | Ratio                                                              | Sum    | q-Val    | p-Val    | Ratio      | Sum    | q-Val    | p-Val    | Ratio        | Sum    | q-Val    | p-Val    | Ratio          | Sum    | q-Val    | p-Val    | Ratio        | Sum    | q-Val    | p-Val    | Ratio          | Sum    | q-Val    | p-Val    | Ratio                   | Sum | q-Val | p-Val | -6 | -4 | -2 | 0 | 2 | 4 | 6 |  |
| FN0074 | -0.272                                                             | 8.272  |          |          | -0.234     | 8.494  | 9.103e-2 | 5.322e-1 | -0.710       | 7.629  |          |          | -0.439         | 7.561  |          |          | 0.038        | 8.222  |          |          | -0.476         | 7.784  |          |          |                         |     |       |       |    |    |    |   |   |   |   |  |
|        | AAL94287.1  Ethanolamine utilization protein eutS                  |        |          |          |            |        |          |          |              |        |          |          |                |        |          |          |              |        |          |          |                |        |          |          |                         |     |       |       |    |    |    |   |   |   |   |  |
| FN0076 | AAL94289.1  Ethanolamine two-component response regulator          |        |          |          |            |        |          |          |              |        |          |          |                |        |          |          |              |        |          |          |                |        |          |          |                         |     |       |       |    |    |    |   |   |   |   |  |
| FN0077 | -1.392                                                             | 4.561  |          |          | 0.632      | 6.769  |          |          |              |        |          |          |                |        |          |          | 2.023        | 5.378  |          |          |                |        |          |          |                         |     |       |       |    |    |    |   |   |   |   |  |
|        | AAL94290.1  Ethanolamine two-component sensor kinase               |        |          |          |            |        |          |          |              |        |          |          |                |        |          |          |              |        |          |          |                |        |          |          |                         |     |       |       |    |    |    |   |   |   |   |  |
| FN0078 | 1.882                                                              | 7.835  |          |          | 1.437      | 7.574  |          |          | -0.209       | 5.540  |          |          | -2.092         | 7.626  | 8.903e-4 | 2.004e-4 | -0.445       | 9.457  | 4.438e-2 | 1.819e-2 | -1.646         | 7.365  | 7.87e-5  | 6.302e-5 |                         |     |       |       |    |    |    |   |   |   |   |  |
|        | AAL94291.1  Ethanolamine utilization protein eutA                  |        |          |          |            |        |          |          |              |        |          |          |                |        |          |          |              |        |          |          |                |        |          |          |                         |     |       |       |    |    |    |   |   |   |   |  |
| FN0079 | 0.842                                                              | 14.037 | 1.25e-1  | 3.005e-1 | 1.007      | 14.387 | 4.635e-5 | 5.505e-5 | -1.622       | 11.369 | 8.866e-5 | 9.065e-5 | -2.464         | 12.415 | 5.967e-2 | 1.037e-1 | 0.165        | 15.228 | 3.665e-3 | 7.552e-1 | -2.629         | 12.764 | 5.003e-5 | 4.262e-5 |                         |     |       |       |    |    |    |   |   |   |   |  |
|        | AAL94292.1  Ethanolamine ammonia-lyase heavy chain                 |        |          |          |            |        |          |          |              |        |          |          |                |        |          |          |              |        |          |          |                |        |          |          |                         |     |       |       |    |    |    |   |   |   |   |  |
| FN0080 | 0.902                                                              | 14.623 | 4.69e-4  | 1.392e-4 | 0.180      | 14.085 | 3.374e-2 | 1.823e-1 | -0.932       | 12.585 | 9.368e-4 | 2.197e-3 | -1.834         | 13.691 | 3.228e-5 | 6.999e-5 | -0.723       | 14.987 | 3.075e-3 | 2.684e-4 | -1.112         | 13.153 | 5.42e-4  | 8.365e-4 |                         |     |       |       |    |    |    |   |   |   |   |  |
|        | AAL94293.1  Ethanolamine ammonia-lyase light chain                 |        |          |          |            |        |          |          |              |        |          |          |                |        |          |          |              |        |          |          |                |        |          |          |                         |     |       |       |    |    |    |   |   |   |   |  |
| FN0081 | 1.042                                                              | 14.363 | 7.517e-2 | 1.565e-1 | 1.350      | 14.856 | 2.767e-3 | 1.014e-2 | -1.614       | 11.503 | 3.069e-5 | 1.767e-5 | -2.656         | 12.749 | 3.831e-2 | 5.419e-2 | 0.308        | 15.898 | 2.664e-1 | 4.741e-1 | -2.954         | 13.242 | 1.679e-3 | 3.729e-3 |                         |     |       |       |    |    |    |   |   |   |   |  |
|        | AAL94294.1  Ethanolamine utilization protein eutL                  |        |          |          |            |        |          |          |              |        |          |          |                |        |          |          |              |        |          |          |                |        |          |          |                         |     |       |       |    |    |    |   |   |   |   |  |
| FN0082 | 1.056                                                              | 8.758  |          |          | 1.343      | 9.229  |          |          | 0.534        | 8.032  |          |          | -0.522         | 9.292  |          |          | 0.287        | 10.285 |          |          | -0.809         | 9.763  | 2.699e-2 | 1.106e-1 |                         |     |       |       |    |    |    |   |   |   |   |  |
|        | AAL94295.1  Ethanolamine utilization protein eutM                  |        |          |          |            |        |          |          |              |        |          |          |                |        |          |          |              |        |          |          |                |        |          |          |                         |     |       |       |    |    |    |   |   |   |   |  |
| FN0083 | 1.151                                                              | 15.460 | 6.376e-2 | 1.263e-1 | 0.714      | 15.208 | 2.881e-3 | 1.066e-2 | -0.929       | 13.177 | 1.214e-3 | 3.115e-3 | -2.079         | 14.531 | 4.203e-2 | 6.167e-2 | -0.436       | 16.359 | 2.349e-1 | 3.977e-1 | -1.643         | 14.280 | 1.247e-3 | 2.574e-3 |                         |     |       |       |    |    |    |   |   |   |   |  |
|        | AAL94296.1  Ethanolamine utilization protein eutM precursor        |        |          |          |            |        |          |          |              |        |          |          |                |        |          |          |              |        |          |          |                |        |          |          |                         |     |       |       |    |    |    |   |   |   |   |  |
| FN0084 | 0.119                                                              | 10.872 | 4.019e-2 | 6.639e-2 | -0.211     | 10.727 | 3.136e-2 | 1.681e-1 | -0.929       | 9.620  | 4.389e-4 | 8.395e-4 | -1.048         | 9.943  | 4.175e-3 | 1.977e-3 | -0.329       | 10.846 | 8.359e-2 | 5.918e-2 | -0.719         | 9.798  | 4.306e-3 | 1.232e-2 |                         |     |       |       |    |    |    |   |   |   |   |  |
|        | AAL94297.1  Acetaldehyde dehydrogenase (acetylating)               |        |          |          |            |        |          |          |              |        |          |          |                |        |          |          |              |        |          |          |                |        |          |          |                         |     |       |       |    |    |    |   |   |   |   |  |
| FN0086 | AAL94299.1  Hypothetical protein                                   |        |          |          |            |        |          |          |              |        |          |          |                |        |          |          |              |        |          |          |                |        |          |          |                         |     |       |       |    |    |    |   |   |   |   |  |
| FN0087 | AAL94300.1  Ethanolamine utilization protein eutN                  |        |          |          |            |        |          |          |              |        |          |          |                |        |          |          |              |        |          |          |                |        |          |          |                         |     |       |       |    |    |    |   |   |   |   |  |
| FN0088 | AAL94301.1  Hypothetical protein                                   |        |          |          |            |        |          |          |              |        |          |          |                |        |          |          |              |        |          |          |                |        |          |          |                         |     |       |       |    |    |    |   |   |   |   |  |
| FN0090 | AAL94303.1  Ethanolamine utilization protein eutQ                  |        |          |          |            |        |          |          |              |        |          |          |                |        |          |          |              |        |          |          |                |        |          |          |                         |     |       |       |    |    |    |   |   |   |   |  |
| FN1891 | 0.939                                                              | 8.361  | 1.275e-1 | 3.085e-1 | 1.317      | 8.923  | 3.924e-4 | 9.01e-4  | 0.151        | 7.369  | 1.013e-1 | 5.703e-1 | -0.788         | 8.512  | 1.377e-1 | 3.577e-1 | 0.377        | 9.862  | 2.765e-1 | 4.99e-1  | -1.168         | 9.074  | 2.615e-4 | 3.219e-4 |                         |     |       |       |    |    |    |   |   |   |   |  |
|        | AAL93990.1  Glycerophosphoryl diester phosphodiesterase            |        |          |          |            |        |          |          |              |        |          |          |                |        |          |          |              |        |          |          |                |        |          |          |                         |     |       |       |    |    |    |   |   |   |   |  |
| FN1908 | 0.384                                                              | 16.395 | 2.988e-2 | 4.49e-2  | 0.545      | 16.741 | 6.616e-4 | 1.767e-3 | -0.372       | 15.435 | 6.722e-3 | 2.592e-2 | -0.756         | 16.023 | 1.28e-2  | 1.097e-2 | 0.161        | 17.125 | 1.713e-1 | 2.414e-1 | -0.917         | 16.369 | 6.053e-4 | 9.818e-4 |                         |     |       |       |    |    |    |   |   |   |   |  |
|        | AAL94007.1  Glycerophosphoryl diester phosphodiesterase            |        |          |          |            |        |          |          |              |        |          |          |                |        |          |          |              |        |          |          |                |        |          |          |                         |     |       |       |    |    |    |   |   |   |   |  |
| FN0089 | AAL94302.1  Ethanolamine permease                                  |        |          |          |            |        |          |          |              |        |          |          |                |        |          |          |              |        |          |          |                |        |          |          |                         |     |       |       |    |    |    |   |   |   |   |  |
| FN0075 | AAL94288.1  Ethanolamine utilization protein eutP                  |        |          |          |            |        |          |          |              |        |          |          |                |        |          |          |              |        |          |          |                |        |          |          |                         |     |       |       |    |    |    |   |   |   |   |  |
| FN0085 | AAL94298.1  Ethanolamine utilization cobalamin adenosyltransferase |        |          |          |            |        |          |          |              |        |          |          |                |        |          |          |              |        |          |          |                |        |          |          |                         |     |       |       |    |    |    |   |   |   |   |  |
| FN1954 | AAL94050.1  Glycerophosphoryl diester phosphodiesterase            |        |          |          |            |        |          |          |              |        |          |          |                |        |          |          |              |        |          |          |                |        |          |          |                         |     |       |       |    |    |    |   |   |   |   |  |
