# Supplementary material for: Proteomics of Fusobacterium nucleatum within a model developing oral microbial community
Source: PubMed Central journal article supplement (PMC4234264; doi:10.1002/mbo3.204), 2014-08-25
Supplement: mbo30003-0729-sd13.pdf [file mbo30003-0729-sd13.pdf]

| ORF    | FnPg vs Fn                                          |        |          |          | FnSg vs Fn |        |          |          | FnPgSg vs Fn |        |          |          | FnPgSg vs FnPg |        |          |          | FnSg vs FnPg |       |          |          | FnPgSg vs FnSg |        |          |          | Log <sub>2</sub> Ratios |     |       |       |    |    |    |   |   |   |
|--------|-----------------------------------------------------|--------|----------|----------|------------|--------|----------|----------|--------------|--------|----------|----------|----------------|--------|----------|----------|--------------|-------|----------|----------|----------------|--------|----------|----------|-------------------------|-----|-------|-------|----|----|----|---|---|---|
|        | Ratio                                               | Sum    | q-Val    | p-Val    | Ratio      | Sum    | q-Val    | p-Val    | Ratio        | Sum    | q-Val    | p-Val    | Ratio          | Sum    | q-Val    | p-Val    | Ratio        | Sum   | q-Val    | p-Val    | Ratio          | Sum    | q-Val    | p-Val    | Ratio                   | Sum | q-Val | p-Val | -6 | -4 | -2 | 0 | 2 | 4 |
| FN0699 | -2.041                                              | 12.095 | 2.411e-4 | 5.119e-5 | -2.538     | 11.782 | 4.124e-5 | 4.597e-5 | -0.586       | 13.346 | 2.028e-3 | 6.159e-3 | 1.455          | 11.509 | 6.894e-3 | 4.104e-3 | -0.498       | 9.741 | 1.948e-1 | 3.009e-1 | 1.952          | 11.196 | 1.933e-4 | 2.055e-4 |                         |     |       |       |    |    |    |   |   |   |
|        | AAL94895.1   Protein translocase subunit secD       |        |          |          |            |        |          |          |              |        |          |          |                |        |          |          |              |       |          |          |                |        |          |          |                         |     |       |       |    |    |    |   |   |   |
| FN0700 | -1.970                                              | 10.170 | 8.457e-4 | 3.581e-4 | -3.208     | 9.117  | 4.65e-4  | 1.179e-3 | -1.124       | 10.813 | 1.864e-3 | 5.557e-3 | 0.847          | 9.046  | 2.532e-2 | 2.968e-2 | -1.237       | 7.147 | 8.819e-2 | 6.643e-2 | 2.084          | 7.994  | 3.144e-6 | 5.274e-7 |                         |     |       |       |    |    |    |   |   |   |
|        | AAL94896.1   Protein translocase subunit secF       |        |          |          |            |        |          |          |              |        |          |          |                |        |          |          |              |       |          |          |                |        |          |          |                         |     |       |       |    |    |    |   |   |   |
| FN0826 | -1.809                                              | 9.442  | 4.137e-4 | 1.131e-4 | -1.468     | 9.967  | 3.602e-4 | 8.111e-4 | -0.526       | 10.521 | 1.786e-3 | 5.264e-3 | 1.282          | 8.916  | 4.308e-3 | 2.06e-3  | 0.340        | 8.158 | 2.634e-1 | 4.669e-1 | 0.942          | 9.440  | 4.821e-3 | 1.433e-2 |                         |     |       |       |    |    |    |   |   |   |
|        | AAL95022.1   periplasmic component of efflux system |        |          |          |            |        |          |          |              |        |          |          |                |        |          |          |              |       |          |          |                |        |          |          |                         |     |       |       |    |    |    |   |   |   |
| FN1274 | -2.178                                              | 9.111  | 8.321e-4 | 3.478e-4 | -1.250     | 10.223 | 5.095e-4 | 1.258e-3 | -1.745       | 9.340  | 4.319e-4 | 8.273e-4 | 0.433          | 7.366  | 1.519e-1 | 4.081e-1 | 0.927        | 8.045 | 1.006e-1 | 8.603e-2 | -0.494         | 8.478  | 8.989e-4 | 1.686e-3 |                         |     |       |       |    |    |    |   |   |   |
|        | AAL95470.1   Acriflavin resistance protein E        |        |          |          |            |        |          |          |              |        |          |          |                |        |          |          |              |       |          |          |                |        |          |          |                         |     |       |       |    |    |    |   |   |   |
| FN2093 | -0.816                                              | 10.423 | 5.559e-2 | 1.039e-1 | -1.908     | 9.515  | 7.33e-5  | 1.061e-4 | -0.781       | 10.254 | 4.272e-3 | 1.511e-2 | 0.035          | 9.642  | 2.836e-1 | 9.489e-1 | -1.092       | 8.699 | 1.561e-1 | 2.051e-1 | 1.127          | 8.734  | 7.759e-3 | 2.596e-2 |                         |     |       |       |    |    |    |   |   |   |
|        | AAL94177.1   General secretion pathway protein G    |        |          |          |            |        |          |          |              |        |          |          |                |        |          |          |              |       |          |          |                |        |          |          |                         |     |       |       |    |    |    |   |   |   |
