# Supplementary material for: Proteomics of Fusobacterium nucleatum within a model developing oral microbial community
Source: PubMed Central journal article supplement (PMC4234264; doi:10.1002/mbo3.204), 2014-08-25
Supplement: mbo30003-0729-sd14.pdf [file mbo30003-0729-sd14.pdf]

| ORF    | FnPg vs Fn                                                   |        |          |          | FnSg vs Fn |        |          |          | FnPgSg vs Fn |        |          |          | FnPgSg vs FnPg |        |          |          | FnSg vs FnPg |        |          |          | FnPgSg vs FnSg |        |          |          | Log <sub>2</sub> Ratios |     |       |       |    |    |    |   |   |   |   |  |
|--------|--------------------------------------------------------------|--------|----------|----------|------------|--------|----------|----------|--------------|--------|----------|----------|----------------|--------|----------|----------|--------------|--------|----------|----------|----------------|--------|----------|----------|-------------------------|-----|-------|-------|----|----|----|---|---|---|---|--|
|        | Ratio                                                        | Sum    | q-Val    | p-Val    | Ratio      | Sum    | q-Val    | p-Val    | Ratio        | Sum    | q-Val    | p-Val    | Ratio          | Sum    | q-Val    | p-Val    | Ratio        | Sum    | q-Val    | p-Val    | Ratio          | Sum    | q-Val    | p-Val    | Ratio                   | Sum | q-Val | p-Val | -6 | -4 | -2 | 0 | 2 | 4 | 6 |  |
| FN0113 | 0.647                                                        | 11.693 | 1.201e-2 | 1.411e-2 | 1.648      | 12.879 | 2.225e-5 | 1.905e-5 | -1.470       | 9.373  | 3.872e-5 | 2.807e-5 | -2.117         | 10.223 | 2.542e-3 | 9.639e-4 | 1.001        | 13.526 | 1.855e-3 | 1.012e-4 | -3.118         | 11.409 | 3.382e-6 | 5.898e-7 |                         |     |       |       |    |    |    |   |   |   |   |  |
|        | AAL94322.1   Heat-inducible transcription repressor hrcA     |        |          |          |            |        |          |          |              |        |          |          |                |        |          |          |              |        |          |          |                |        |          |          |                         |     |       |       |    |    |    |   |   |   |   |  |
| FN0189 |                                                              |        |          |          |            |        |          |          |              |        |          |          | -1.400         | 7.244  |          |          | -0.627       | 8.202  |          |          | -0.773         | 6.802  | 4.787e-3 | 1.42e-2  |                         |     |       |       |    |    |    |   |   |   |   |  |
|        | AAL94395.1   Two-component response regulator yesN           |        |          |          |            |        |          |          |              |        |          |          |                |        |          |          |              |        |          |          |                |        |          |          |                         |     |       |       |    |    |    |   |   |   |   |  |
| FN0503 | -0.592                                                       | 11.037 | 4.431e-2 | 7.591e-2 | -0.224     | 11.590 | 8.655e-3 | 3.936e-2 | -0.137       | 11.289 | 2.524e-2 | 1.175e-1 | 0.456          | 10.900 | 7.943e-2 | 1.543e-1 | 0.369        | 10.998 | 1.683e-1 | 2.34e-1  | 0.087          | 11.453 | 4.988e-4 | 7.451e-4 |                         |     |       |       |    |    |    |   |   |   |   |  |
|        | AAL94699.1   Transcriptional regulatory protein, LYSR family |        |          |          |            |        |          |          |              |        |          |          |                |        |          |          |              |        |          |          |                |        |          |          |                         |     |       |       |    |    |    |   |   |   |   |  |
| FN0528 | -2.764                                                       | 18.819 | 1.531e-3 | 8.813e-4 | -5.943     | 15.825 | 2.971e-5 | 8.705e-7 | -0.907       | 20.473 | 7.938e-5 | 7.754e-5 | 1.857          | 17.912 | 9.089e-3 | 6.487e-3 | -3.178       | 13.061 | 1.321e-1 | 1.446e-1 | 5.036          | 14.918 | 2e-4     | 2.185e-4 |                         |     |       |       |    |    |    |   |   |   |   |  |
|        | AAL94724.1   Cold shock protein                              |        |          |          |            |        |          |          |              |        |          |          |                |        |          |          |              |        |          |          |                |        |          |          |                         |     |       |       |    |    |    |   |   |   |   |  |
| FN0681 | 0.072                                                        | 16.439 | 2.266e-1 | 6.533e-1 | -0.045     | 16.507 | 1.015e-1 | 6.006e-1 | -0.629       | 15.534 | 5.92e-4  | 1.237e-3 | -0.701         | 15.810 | 2.402e-2 | 2.75e-2  | -0.117       | 16.579 | 2.764e-1 | 4.986e-1 | -0.585         | 15.877 | 2.382e-4 | 5.789e-3 |                         |     |       |       |    |    |    |   |   |   |   |  |
|        | AAL94877.1   Transcriptional regulator, MarR family          |        |          |          |            |        |          |          |              |        |          |          |                |        |          |          |              |        |          |          |                |        |          |          |                         |     |       |       |    |    |    |   |   |   |   |  |
| FN0813 | 1.746                                                        | 8.898  |          |          | 2.271      | 9.608  | 2.515e-6 | 6.489e-7 | -0.317       | 6.632  | 9.265e-2 | 5.199e-1 | -2.063         | 8.581  |          |          | 0.526        | 11.354 |          |          | -2.588         | 9.291  | 1.507e-4 | 1.494e-4 |                         |     |       |       |    |    |    |   |   |   |   |  |
|        | AAL95009.1   Transcriptional regulator, TetR family          |        |          |          |            |        |          |          |              |        |          |          |                |        |          |          |              |        |          |          |                |        |          |          |                         |     |       |       |    |    |    |   |   |   |   |  |
| FN0943 | 1.943                                                        | 8.232  |          |          | 1.376      | 7.849  | 8.893e-3 | 4.065e-2 | -0.898       | 5.187  | 1.816e-4 | 2.518e-4 | -2.841         | 7.334  |          |          | -0.567       | 9.792  |          |          | -2.274         | 6.951  | 6.429e-3 | 2.057e-2 |                         |     |       |       |    |    |    |   |   |   |   |  |
|        | AAL95139.1   Sensory Transduction Protein Kinase             |        |          |          |            |        |          |          |              |        |          |          |                |        |          |          |              |        |          |          |                |        |          |          |                         |     |       |       |    |    |    |   |   |   |   |  |
| FN1091 | -1.787                                                       | 7.371  | 8.297e-4 | 3.461e-4 | -0.843     | 8.500  | 2.384e-3 | 8.445e-3 | -0.748       | 8.207  | 3.135e-4 | 5.364e-4 | 1.040          | 6.623  | 9.028e-3 | 6.443e-3 | 0.944        | 6.713  | 7.9e-2   | 5.261e-2 | 0.095          | 7.752  | 1.414e-1 | 7.125e-1 |                         |     |       |       |    |    |    |   |   |   |   |  |
|        | AAL95287.1   Sigma factor sigB regulation protein rsbU       |        |          |          |            |        |          |          |              |        |          |          |                |        |          |          |              |        |          |          |                |        |          |          |                         |     |       |       |    |    |    |   |   |   |   |  |
| FN1317 | -0.425                                                       | 7.763  | 6.64e-2  | 1.333e-1 | -0.766     | 7.607  | 6.868e-4 | 1.857e-3 |              |        |          |          |                |        |          |          | -0.341       | 7.182  | 1.95e-1  | 3.013e-1 |                |        |          |          |                         |     |       |       |    |    |    |   |   |   |   |  |
|        | AAL95513.1   RNA polymerase sigma factor                     |        |          |          |            |        |          |          |              |        |          |          |                |        |          |          |              |        |          |          |                |        |          |          |                         |     |       |       |    |    |    |   |   |   |   |  |
| FN1318 | -0.535                                                       | 10.215 | 1.379e-2 | 1.671e-2 | -0.955     | 9.979  | 9.638e-4 | 2.849e-3 | -0.272       | 10.274 | 9.167e-3 | 3.726e-2 | 0.262          | 9.943  | 8.204e-2 | 1.617e-1 | -0.420       | 9.445  | 1.354e-1 | 1.52e-1  | 0.683          | 9.707  | 7.783e-3 | 2.806e-2 |                         |     |       |       |    |    |    |   |   |   |   |  |
|        | AAL95514.1   RNA polymerase sigma factor rpoD                |        |          |          |            |        |          |          |              |        |          |          |                |        |          |          |              |        |          |          |                |        |          |          |                         |     |       |       |    |    |    |   |   |   |   |  |
| FN1321 | 0.002                                                        | 19.560 | 3.006e-1 | 9.58e-1  | 0.313      | 20.055 | 7.656e-4 | 2.157e-3 | 0.034        | 19.388 | 1.389e-1 | 8.162e-1 | 0.032          | 19.594 | 2.554e-1 | 8.225e-1 | 0.311        | 20.057 | 2.495e-2 | 6.668e-3 | -0.279         | 20.089 | 2.344e-2 | 9.448e-2 |                         |     |       |       |    |    |    |   |   |   |   |  |
|        | AAL95517.1   Acetoacetate metabolism regulatory protein atoC |        |          |          |            |        |          |          |              |        |          |          |                |        |          |          |              |        |          |          |                |        |          |          |                         |     |       |       |    |    |    |   |   |   |   |  |
| FN1439 | -2.376                                                       | 11.423 |          |          | -3.837     | 10.146 | 9.237e-4 | 2.705e-3 | -1.963       | 11.632 | 1.338e-3 | 3.882e-3 | 0.413          | 9.460  |          |          | -1.461       | 7.770  |          |          | 1.874          | 8.183  | 2.529e-3 | 6.227e-3 |                         |     |       |       |    |    |    |   |   |   |   |  |
|        | AAL95632.1   Transcriptional regulator, DeoR family          |        |          |          |            |        |          |          |              |        |          |          |                |        |          |          |              |        |          |          |                |        |          |          |                         |     |       |       |    |    |    |   |   |   |   |  |
| FN1831 | 0.505                                                        | 12.687 | 8.971e-3 | 9.957e-3 | 0.765      | 13.132 | 3.158e-5 | 9.618e-7 | -0.796       | 11.183 | 3.185e-3 | 1.06e-2  | -1.301         | 11.892 | 9.341e-4 | 2.159e-4 | 0.260        | 13.637 | 5.632e-2 | 2.828e-2 | -1.561         | 12.336 | 2.961e-4 | 3.795e-4 |                         |     |       |       |    |    |    |   |   |   |   |  |
|        | AAL93930.1   Nitrogen assimilation regulatory protein        |        |          |          |            |        |          |          |              |        |          |          |                |        |          |          |              |        |          |          |                |        |          |          |                         |     |       |       |    |    |    |   |   |   |   |  |
| FN1914 | 0.655                                                        | 13.979 | 1.845e-1 | 5.029e-1 | -0.288     | 13.220 | 8.129e-3 | 3.656e-2 | -0.623       | 12.497 | 1.233e-3 | 3.184e-3 | -1.278         | 13.356 | 1.249e-1 | 3.081e-1 | -0.943       | 13.875 | 2.323e-1 | 3.908e-1 | -0.335         | 12.597 | 1.324e-2 | 4.887e-2 |                         |     |       |       |    |    |    |   |   |   |   |  |
|        | AAL94013.1   Anti-sigma F factor antagonist                  |        |          |          |            |        |          |          |              |        |          |          |                |        |          |          |              |        |          |          |                |        |          |          |                         |     |       |       |    |    |    |   |   |   |   |  |
| FN1987 | 2.122                                                        | 7.705  |          |          | -0.299     | 5.469  |          |          | -0.545       | 4.834  | 1.357e-3 | 3.658e-3 | -2.667         | 7.160  |          |          | -2.421       | 7.591  |          |          | -0.246         | 4.924  |          |          |                         |     |       |       |    |    |    |   |   |   |   |  |
|        | AAL94077.1   Transcriptional regulator, GntR family          |        |          |          |            |        |          |          |              |        |          |          |                |        |          |          |              |        |          |          |                |        |          |          |                         |     |       |       |    |    |    |   |   |   |   |  |
