# Supplementary material for: Proteomics of Fusobacterium nucleatum within a model developing oral microbial community
Source: Microbiologyopen. 2014 Aug 25;3(5):729–51. doi: 10.1002/mbo3.204 (PMC4234264; doi:10.1002/mbo3.204)
Supplement: Table S10 — FileMaker results for adhesion and outer membrane proteins. Results and color coding as listed in Table S9 above. [file mbo30003-0729-sd12.pdf]

| ORF    | FnPg vs Fn                                              |        |          |          | FnSg vs Fn |        |          |          | FnPgSg vs Fn |        |          |          | FnPgSg vs FnPg |        |          |          | FnSg vs FnPg |        |          |          | FnPgSg vs FnSg |        |          |          | Log <sub>2</sub> Ratios |    |    |   |   |   |   |
|--------|---------------------------------------------------------|--------|----------|----------|------------|--------|----------|----------|--------------|--------|----------|----------|----------------|--------|----------|----------|--------------|--------|----------|----------|----------------|--------|----------|----------|-------------------------|----|----|---|---|---|---|
|        | Ratio                                                   | Sum    | q-Val    | p-Val    | Ratio      | Sum    | q-Val    | p-Val    | Ratio        | Sum    | q-Val    | p-Val    | Ratio          | Sum    | q-Val    | p-Val    | Ratio        | Sum    | q-Val    | p-Val    | Ratio          | Sum    | q-Val    | p-Val    | -6                      | -4 | -2 | 0 | 2 | 4 | 6 |
| FN0264 | -0.911                                                  | 16.196 | 1.619e-2 | 2.05e-2  | -0.960     | 16.331 | 3.951e-3 | 1.586e-2 | -0.264       | 16.639 | 2.791e-3 | 9.036e-3 | 0.647          | 15.932 | 4.078e-2 | 5.91e-2  | -0.049       | 15.420 | 4.096e-1 | 9.050e-1 | 0.696          | 16.067 | 1.196e-2 | 4.339e-2 |                         |    |    |   |   |   |   |
|        | AAL94470.1  Hypothetical protein                        |        |          |          |            |        |          |          |              |        |          |          |                |        |          |          |              |        |          |          |                |        |          |          |                         |    |    |   |   |   |   |
| FN0682 | -0.287                                                  | 8.933  | 1.441e-1 | 3.602e-1 | 0.352      | 9.756  | 1.795e-2 | 9.099e-2 | -0.398       | 8.618  | 4.682e-2 | 2.403e-1 | -0.111         | 8.535  | 2.443e-1 | 7.748e-1 | 0.639        | 9.469  | 6.915e-2 | 4.046e-2 | -0.750         | 9.358  | 8.597e-3 | 2.926e-2 |                         |    |    |   |   |   |   |
|        | AAL94878.1  Fibronectin-binding protein-like protein A  |        |          |          |            |        |          |          |              |        |          |          |                |        |          |          |              |        |          |          |                |        |          |          |                         |    |    |   |   |   |   |
| FN1526 | -0.352                                                  | 22.555 | 1.721e-1 | 4.564e-1 | -2.550     | 20.542 | 5.399e-6 | 2.151e-6 | -0.638       | 22.065 | 3.842e-4 | 7.109e-4 | -0.286         | 21.917 | 2.052e-1 | 6.188e-1 | -2.198       | 20.190 | 1.055e-1 | 9.383e-2 | 1.911          | 19.903 | 4.134e-4 | 5.800e-4 |                         |    |    |   |   |   |   |
|        | AAL93652.1  Fusobacterium outer membrane protein family |        |          |          |            |        |          |          |              |        |          |          |                |        |          |          |              |        |          |          |                |        |          |          |                         |    |    |   |   |   |   |
| FN1529 | -0.496                                                  | 12.897 | 1.244e-1 | 2.989e-1 | -2.743     | 10.835 | 1.903e-6 | 1.53e-6  | -0.438       | 12.752 | 2.029e-2 | 9.178e-2 | 0.058          | 12.459 | 2.761e-1 | 9.146e-1 | -2.247       | 10.339 | 1.041e-1 | 9.151e-2 | 2.305          | 10.397 | 2.849e-3 | 7.201e-3 |                         |    |    |   |   |   |   |
|        | AAL93655.1  Hypothetical protein                        |        |          |          |            |        |          |          |              |        |          |          |                |        |          |          |              |        |          |          |                |        |          |          |                         |    |    |   |   |   |   |
| FN1859 | -0.003                                                  | 24.501 | 3.09e-1  | 9.971e-1 | 1.188      | 25.876 | 6.909e-3 | 3.021e-2 | -1.875       | 22.425 | 5.322e-4 | 1.08e-3  | -1.872         | 22.626 | 1.071e-1 | 2.46e-1  | 1.191        | 25.873 | 1.005e-1 | 8.631e-2 | -3.063         | 24.001 | 3.561e-3 | 9.549e-3 |                         |    |    |   |   |   |   |
|        | AAL93958.1  Major outer membrane protein                |        |          |          |            |        |          |          |              |        |          |          |                |        |          |          |              |        |          |          |                |        |          |          |                         |    |    |   |   |   |   |
